# Supplementary material for: Adverse events associated with Implantable Collamer Lens: insights from the FDA MAUDE database
Source: Front Med (Lausanne). 2025 Jul 21;12:1613060. doi: 10.3389/fmed.2025.1613060 (PMC12319018; doi:10.3389/fmed.2025.1613060)
Supplement: Supplementary file 4 [file Table_3.XLSX]

## Sheet: Original_MTA
Web Address	Report Number	Event Date	Event Type	Manufacturer	Date Received	Product Code	Brand Name	Device Problem	Patient Problem	PMA/PMN Number	Number of Events	Event Text
https://www.accessdata.fda.gov/scripts/cdrh/cfdocs/cfMAUDE/Detail.CFM?MDRFOI__ID=13765543&pc=MTA	2023826-2022-00787	2022-01-21 05:00:00	Malfunction	STAAR SURGICAL COMPANY	2022-03-15 04:00:00	MTA	IMPLANTABLE COLLAMER LENS (ICL)	No Apparent Adverse Event			1	Event Description: THE REPORTER INDICATED THAT WHILE ATTEMPTING TO IMPLANT A 12.6MM VICM5_12.6; -7.5 DIOPTER IMPLANTABLE COLLAMER LENS INTO THE PATIENT'S RIGHT EYE (OD) ON (B)(6) 2022; THE LENS TORE. THERE WAS NO PATIENT CONTACT. A REPLACEMENT LENS OF THE SAME MODEL/LENGTH WAS IMPLANTED AND THIS RESOLVED THE PROBLEM. THE CAUSE OF THE EVENT WAS REPORTED AS UNKNOWN. Manufacturer Narrative: PMA/510(…
https://www.accessdata.fda.gov/scripts/cdrh/cfdocs/cfMAUDE/Detail.CFM?MDRFOI__ID=11713110&pc=MTA	2023826-2021-01141	2018-09-01 04:00:00	Injury	STAAR SURGICAL COMPANY	2021-04-23 04:00:00	MTA	IMPLANTABLE COLLAMER LENS (ICL)	Adverse Event Without Identified Device or Use Problem	Appropriate Clinical Signs, Symptoms, Conditions Term / Code Not Available	NA	1	Event Description: THE REPORTER INDICATED THE SURGEON IMPLANTED A 13.2MM VICMO13.2 IMPLANTABLE COLLAMER LENS, -18.00 DIOPTER, IN THE PATIENTS RIGHT EYE (OD) ON (B)(6) 2017. THE REPORTER INDICATED THE PATIENT HAD SIGNIFICANT REDUCTION OF ENDOTHELIAL CELL COUNT OR SIGNIFICANT ENDOTHELIAL CELL LOSS OVER A PERIOD OF 3 YEARS. THE SURGEON HAS DECIDED TO LEAVE THE LENS IMPLANTED AND THE PATIENT WILL BE …
https://www.accessdata.fda.gov/scripts/cdrh/cfdocs/cfMAUDE/Detail.CFM?MDRFOI__ID=11738872&pc=MTA	2023826-2021-01192	2018-10-31	Injury	STAAR SURGICAL COMPANY	2021-04-28	MTA	IMPLANTABLE COLLAMER LENS (ICL)	Adverse Event Without Identified Device or Use Problem	Appropriate Clinical Signs, Symptoms, Conditions Term / Code Not Available	N/A	1	Event Description: THE REPORTER INDICATED THAT THE SURGEON IMPLANTED A 13.2MM VICMO13.2, -09.50 DIOPTER, IMPLANTABLE COLLAMER LENS INTO THE PATIENT'S LEFT EYE (OS) ON (B)(6) 2018. THE LENS WAS EXPLANTED ON (B)(6) 2019 DUE TO PIGMENT DISPERSION. THIS RESOLVED THE PROBLEM. REPORTEDLY, IN ORDER TO PREVENT THE ADVERSE EFFECTS CAUSED BY LONG-TERM EXISTENCE IN THE FUTURE, THE LENS WAS REMOVED FROM POST…
https://www.accessdata.fda.gov/scripts/cdrh/cfdocs/cfMAUDE/Detail.CFM?MDRFOI__ID=10900025&pc=MTA	2023826-2020-02749	2020-10-14 04:00:00	Injury	STAAR SURGICAL COMPANY	2020-11-25 05:00:00	MTA	IMPLANTABLE COLLAMER LENS (ICL)	Adverse Event Without Identified Device or Use Problem	Appropriate Clinical Signs, Symptoms, Conditions Term / Code Not Available	NA#S-P#NA	1	Event Description: THE REPORTER INDICATED THE SURGEON INSERTED AND REMOVED A 12.6MM VICMO12.6 IMPLANTABLE COLLAMER LENS, -13.00 DIOPTER, WITHIN THE SAME SURGERY DUE TO THE LENS TORE DURING DELIVERY INTO THE PATIENTS RIGHT EYE (OD). APPROXIMATELY 2 WEEKS LATER IT WAS FOUND THE PATIENTS ENDOTHELIAL VALUE HAD DECREASED SIGNIFICANTLY. THE SURGEON DID NOT IMPLANT ANOTHER ICL LENS, AND THE PATIENT IS B…
https://www.accessdata.fda.gov/scripts/cdrh/cfdocs/cfMAUDE/Detail.CFM?MDRFOI__ID=11507492&pc=MTA	2023826-2021-00661	2021-01-29	Injury	STAAR SURGICAL COMPANY	2021-03-17	MTA	IMPLANTABLE COLLAMER LENS	Adverse Event Without Identified Device or Use Problem	Appropriate Clinical Signs, Symptoms, Conditions Term / Code Not Available	NA	1	Event Description: THE REPORTER INDICATED THAT THE SURGEON IMPLANTED A 12.1MM VICMO12.1 IMPLANTABLE COLLAMER LENS, -16.5 DIOPTER INTO THE PATIENT'S RIGHT EYE (OD) ON (B)(6) 2021. THE SURGEON REPORTS AN UNREACTIVE (FIXED) PUPIL. REPORTEDLY, THE LENS REMAINS IMPLANTED. THE CAUSE IS REPORTED AS OTHER: THE SURGEON THINKS IT'S RELATED TO OVD REMANANT. THE PUPIL IS UNREACTIVE, EVEN WITH PIL TREATMENT T…
https://www.accessdata.fda.gov/scripts/cdrh/cfdocs/cfMAUDE/Detail.CFM?MDRFOI__ID=12443637&pc=MTA	2023826-2021-03481	2021-06-07 04:00:00	Injury	STAAR SURGICAL COMPANY	2021-09-08 04:00:00	MTA	IMPLANTABLE COLLAMER LENS (ICL)	Adverse Event Without Identified Device or Use Problem	Appropriate Clinical Signs, Symptoms, Conditions Term / Code Not Available	NA	1	Event Description: THE REPORTER INDICATED THE SURGEON IMPLANTED A 12.1MM VICM5_12.1 IMPLANTABLE COLLAMER LENS, -09.00 DIOPTER, INTO THE PATIENTS RIGHT EYE (OD), ON (B)(6) 2021. THE LENS WAS EXPLANTED ON (B)(6) 2021 DUE TO THE PATIENT EXPECTED A BETTER NEAR VISION OUTCOME. THE LENS WAS REPLACED WITH ANOTHER SAME MODEL/LENGTH BUT DIFFERENT DIOPTER LENS BUT THE PROBLEM WAS NOT RESOLVED. POST-OP THE …
https://www.accessdata.fda.gov/scripts/cdrh/cfdocs/cfMAUDE/Detail.CFM?MDRFOI__ID=12478420&pc=MTA	2023826-2021-03565	2021-09-01 04:00:00	Malfunction	STAAR SURGICAL COMPANY	2021-09-15 04:00:00	MTA	IMPLANTABLE COLLAMER LENS (ICL)	Adverse Event Without Identified Device or Use Problem	Appropriate Clinical Signs, Symptoms, Conditions Term / Code Not Available	P030016	1	Event Description: THE REPORTER INDICATED THE SURGEON INSERTED AND REMOVED A 13.2MM MICL13.2 IMPLANTABLE COLLAMER LENS, -10.50 DIOPTER, INTO THE PATIENTS RIGHT EYE (OD) 2 TIMES, DURING THE SAME SURGERY DUE TO THE LENS WOULD NOT UNFOLD. THERE WAS SOME IRIS PROLAPSE DURING THE PROCEDURE. AFTER THE SECOND TRY, THE SURGEON REPLACED THE LENS WITH ANOTHER SAME MODEL/LENGTH LENS AND THE PROBLEM WAS RESO…
https://www.accessdata.fda.gov/scripts/cdrh/cfdocs/cfMAUDE/Detail.CFM?MDRFOI__ID=14107551&pc=MTA	2023826-2022-01197	2022-02-18 05:00:00	Injury	STAAR SURGICAL COMPANY	2022-04-13 04:00:00	MTA	IMPLANTABLE COLLAMER LENS (ICL)	Adverse Event Without Identified Device or Use Problem	Appropriate Clinical Signs, Symptoms, Conditions Term / Code Not Available	P030016	1	Event Description: THE REPORTER INDICATED THE SURGEON IMPLANTED A SPHERICAL NON-TORIC ICL IMPLANTABLE COLLAMER LENS, IN THE PATIENTS LEFT EYE (OS) ON (B)(6) 2022. THE PATIENT UNDERWENT PRK SURGERY FOR ASTIGMATISM ON (B)(6) 2022 AND IS NOW DOING WELL. THE LENS REMAINED IMPLANTED. ADDITIONAL INFORMATION HAS BEEN REQUESTED BUT NONE HAS BEEN FORTHCOMING. Manufacturer Narrative: WEIGHT: UNK. ETHNICITY…
https://www.accessdata.fda.gov/scripts/cdrh/cfdocs/cfMAUDE/Detail.CFM?MDRFOI__ID=14310615&pc=MTA	2023826-2022-01395	2022-04-01 04:00:00	Malfunction	STAAR SURGICAL COMPANY	2022-05-06 04:00:00	MTA	IMPLANTABLE COLLAMER LENS (ICL)	Adverse Event Without Identified Device or Use Problem	Appropriate Clinical Signs, Symptoms, Conditions Term / Code Not Available	P030016	1	Event Description: THE REPORTER INDICATED THAT A 13.2MM, MICL13.2, -7.0 DIOPTER IMPLANTABLE COLLAMER LENS WAS IMPLANTED INTO THE PATIENTS RIGHT EYE (OD) ON (B)(6) 2022. PIGMENT DISPERSION, IRIS ATROPHY, FIXED PUPIL WITH DIFFUSE TRANSILLUMINATION IRIS DEFECTS (TID) WAS OBSERVED, LENS REMAINS IMPLANTED. IN THE REPORTER OPINION THE CAUSE OF THIS EVENT IS UNKNOWN. IT WAS ALSO REPORTED THAT THE DEVICE…
https://www.accessdata.fda.gov/scripts/cdrh/cfdocs/cfMAUDE/Detail.CFM?MDRFOI__ID=15937259&pc=MTA	2023826-2022-04286	2022-05-16 04:00:00	Injury	STAAR SURGICAL COMPANY	2022-12-07 05:00:00	MTA	IMPLANTABLE COLLAMER LENS (ICL)	Adverse Event Without Identified Device or Use Problem	Appropriate Clinical Signs, Symptoms, Conditions Term / Code Not Available	P030016	1	Event Description: THE REPORTER INDICATED THAT A 13.2MM VICM5 13.2 IMPLANTABLE COLLAMER LENS OF -8.00 DIOPTER WAS IMPLANTED INTO THE PATIENTS LEFT EYE (OS) ON (B)(6) 2021. ON (B)(6) 2022 THE LENS WAS EXCHANGED FOR A SAME MODEL;SIZE LENS BUT DIFFERENT DIOPTER DUE TO PATIENT DISSATISFACTION DUE TO UNDER CORRECTION. THE REPLACEMENT LENS RESOLVED THE PROBLEM. Manufacturer Narrative: (B)(4). CLAIM# (B…
https://www.accessdata.fda.gov/scripts/cdrh/cfdocs/cfMAUDE/Detail.CFM?MDRFOI__ID=16032620&pc=MTA	2023826-2022-04640	2022-07-18 04:00:00	Injury	STAAR SURGICAL COMPANY	2022-12-22 05:00:00	MTA	IMPLANTABLE COLLAMER LENS (ICL)	Adverse Event Without Identified Device or Use Problem	Appropriate Clinical Signs, Symptoms, Conditions Term / Code Not Available	P030016	1	Event Description: THE REPORTER INDICATED THAT A 12.6MM VICMO12.6 -7.00 DIOPTER IMPLANTABLE COLLAMER LENS WAS IMPLANTED INTO THE PATIENTS RIGHT EYE (OD) ON (B)(6) 2022. ON (B)(6) 2022 THE LENS WAS EXPLANTED DUE TO SIGNIFICANT REDUCTION OF ENDOTHELIAL CELL LOSS/COUNT. IT WAS REPORTED THAT THE PROBLEM RESOLVED. Manufacturer Narrative: (B)(4). LENS WORK ORDER SEARCH: NO SIMILAR COMPLAINT TYPE EVENTS…
https://www.accessdata.fda.gov/scripts/cdrh/cfdocs/cfMAUDE/Detail.CFM?MDRFOI__ID=16032644&pc=MTA	2023826-2022-04641	2022-07-18 04:00:00	Injury	STAAR SURGICAL COMPANY	2022-12-22 05:00:00	MTA	IMPLANTABLE COLLAMER LENS (ICL)	Adverse Event Without Identified Device or Use Problem	Appropriate Clinical Signs, Symptoms, Conditions Term / Code Not Available	P030016	1	Event Description: THE REPORTER INDICATED THAT A 12.6MM VICMO12.6 -7.00 DIOPTER IMPLANTABLE COLLAMER LENS WAS IMPLANTED INTO THE PATIENTS LEFT EYE (OS) ON (B)(6) 2022. ON (B)(6) 2022 THE LENS WAS EXPLANTED DUE TO SIGNIFICANT REDUCTION OF ENDOTHELIAL CELL LOSS/COUNT. IT WAS REPORTED THAT THE PROBLEM RESOLVED. Manufacturer Narrative: (B)(4). LENS WORK ORDER SEARCH: NO SIMILAR COMPLAINT TYPE EVENTS …
https://www.accessdata.fda.gov/scripts/cdrh/cfdocs/cfMAUDE/Detail.CFM?MDRFOI__ID=16018654&pc=MTA	2023826-2022-04627	2022-09-27 04:00:00	Injury	STAAR SURGICAL COMPANY	2022-12-20 05:00:00	MTA	IMPLANTABLE COLLAMER LENS (ICL)	Adverse Event Without Identified Device or Use Problem	Appropriate Clinical Signs, Symptoms, Conditions Term / Code Not Available	P030016	1	Event Description: THE REPORTER INDICATED THAT A 12.6MM VICMO12.6 IMPLANTABLE COLLAMER LENS -8.50 DIOPTER WAS IMPLANTED INTO THE PATIENT'S RIGHT EYE (OD) ON (B)(6) 2022. ON (B)(6) 2022 THE LENS WAS EXCHANGED FOR A SHORTER LENGTH LENS DUE TO SIGNIFICANT REDUCTION OF IRIDO-CORNEAL ANGELS. THE EXCHANGE RESOLVED THE PROBLEM. CAUSE OF EVENT WAS REPORTED AS UNKNOWN. Manufacturer Narrative: (B)(4). CLAI…
https://www.accessdata.fda.gov/scripts/cdrh/cfdocs/cfMAUDE/Detail.CFM?MDRFOI__ID=16018234&pc=MTA	2023826-2022-04628	2022-09-28 04:00:00	Injury	STAAR SURGICAL COMPANY	2022-12-20 05:00:00	MTA	IMPLANTABLE COLLAMER LENS (ICL)	Adverse Event Without Identified Device or Use Problem	Appropriate Clinical Signs, Symptoms, Conditions Term / Code Not Available	P030016	1	Event Description: THE REPORTER INDICATED THAT A 12.6MM VICMO12.6 IMPLANTABLE COLLAMER LENS -8.50 DIOPTER WAS IMPLANTED INTO THE PATIENT'S LEFT EYE (OS) ON (B)(6) 2022. ON (B)(6) 2022 THE LENS WAS EXCHANGED FOR A SHORTER LENGTH LENS DUE TO SIGNIFICANT REDUCTION OF IRIDO-CORNEAL ANGELS. THE EXCHANGE RESOLVED THE PROBLEM. CAUSE OF EVENT WAS REPORTED AS UNKNOWN. Manufacturer Narrative: (B)(4). CLAIM…
https://www.accessdata.fda.gov/scripts/cdrh/cfdocs/cfMAUDE/Detail.CFM?MDRFOI__ID=16034514&pc=MTA	2023826-2022-04643	2022-11-10 05:00:00	Injury	STAAR SURGICAL COMPANY	2022-12-22 05:00:00	MTA	IMPLANTABLE COLLAMER LENS (ICL)	Adverse Event Without Identified Device or Use Problem	Appropriate Clinical Signs, Symptoms, Conditions Term / Code Not Available	P030016	1	Event Description: THE REPORTER INDICATED THAT A 13.2MM VICM5_13.2 IMPLANTABLE COLLAMER LENS OF -3.00 DIOPTER WAS IMPLANTED INTO THE PATIENT'S RIGHT EYE (OD) ON (B)(6) 2022. ON (B)(6) 2022 THE LENS WAS EXPLANTED. THE REPORTER STATED "WE EXPLANTED THE LENS BECAUSE THE PATIENT WAS NOT PHYSICALLY SATISFIED. SHE SAW ONE PUPIL BIGGER THAN THE OTHER. SHE NOTICED THE PUPIL OF THE RIGHT EYE WAS LARGER TH…
https://www.accessdata.fda.gov/scripts/cdrh/cfdocs/cfMAUDE/Detail.CFM?MDRFOI__ID=18014407&pc=MTA	2023826-2023-04782	2023-01-20 05:00:00	Injury	STAAR SURGICAL COMPANY	2023-10-26 04:00:00	MTA	IMPLANTABLE COLLAMER LENS (ICL)	Adverse Event Without Identified Device or Use Problem	Appropriate Clinical Signs, Symptoms, Conditions Term / Code Not Available	P030016	1	Event Description: THE REPORTER INDICATED THAT A 12.1MM VICM5 12.1 IMPLANTABLE COLLAMER LENS OF -12.00 DIOPTER WAS IMPLANTED INTO THE PATIENTS RIGHT EYE (OD) ON (B)(6) 2023. ON (B)(6) 2023 THE LENS WAS EXCHANGED FOR A TORIC LENS DUE TO PATIENT DISSATISFACTION. THE REPLACEMENT LENS RESOLVED THE PROBLEM. Manufacturer Narrative: H6-CLINICAL CODE: 4681- PATIENT DISSATISFACTION. H6-INVESTIGATION TYPE …
https://www.accessdata.fda.gov/scripts/cdrh/cfdocs/cfMAUDE/Detail.CFM?MDRFOI__ID=16739732&pc=MTA	2023826-2023-01369	2023-03-20 04:00:00	Malfunction	STAAR SURGICAL COMPANY	2023-04-13 04:00:00	MTA	IMPLANTABLE COLLAMER LENS (ICL)	Adverse Event Without Identified Device or Use Problem	Appropriate Clinical Signs, Symptoms, Conditions Term / Code Not Available	P030016	1	Event Description: THE REPORTER INDICATED THAT THE SURGEON IMPLANTED A 13.2MM VICMO13.2; -7.50 DIOPTER IMPLANTABLE COLLAMER LENS INTO THE PATIENT'S RIGHT EYE (OD) ON (B)(6) 2023. THE SURGEON NOTES THE PATIENT HAD "BIGGER PUPIL DIAMETER POSTOP THAN PREOP". LENS REMAINS IMPLANTED. THE CAUSE OF THE EVENT WAS REPORTED AS UNKNOWN. Manufacturer Narrative: CORRECTED DATA: B5: SHOULD BE CORRECTED TO: THE…
https://www.accessdata.fda.gov/scripts/cdrh/cfdocs/cfMAUDE/Detail.CFM?MDRFOI__ID=17225357&pc=MTA	2023826-2023-02469	2023-03-22 04:00:00	Injury	STAAR SURGICAL COMPANY	2023-06-29 04:00:00	MTA	IMPLANTABLE COLLAMER LENS (ICL)	Adverse Event Without Identified Device or Use Problem	Appropriate Clinical Signs, Symptoms, Conditions Term / Code Not Available	P030016	1	Event Description: THE REPORTER INDICATED THE SURGEON IMPLANTED A 12.6MM VICM5_12.6 IMPLANTABLE COLLAMER LENS, -14.00 DIOPTER, IN THE PATIENTS LEFT EYE (OS) ON (B)(6) 2023. THE LENS WAS REMOVED ON (B)(6) 2023 DUE TO PATIENT EXPERIENCED REFRACTIVE CHANGE OVERTIME. THE LENS WAS REPLACED WITH A DIFFERENT MODEL/POWER LENS AND THE PROBLEM WAS RESOLVED. THE CAUSE OF THE EVENT WAS UNKNOWN. Manufacturer …
https://www.accessdata.fda.gov/scripts/cdrh/cfdocs/cfMAUDE/Detail.CFM?MDRFOI__ID=18116582&pc=MTA	2023826-2023-04949	2023-06-08 04:00:00	Injury	STAAR SURGICAL COMPANY	2023-11-10 05:00:00	MTA	IMPLANTABLE COLLAMER LENS (ICL)	Adverse Event Without Identified Device or Use Problem	Appropriate Clinical Signs, Symptoms, Conditions Term / Code Not Available	P030016	1	Event Description: THE REPORTER INDICATED THAT A 12.6MM VICM5 12.6 IMPLANTABLE COLLAMER LENS OF -5.00 DIOPTER WAS IMPLANTED INTO THE PATIENTS LEFT EYE (OS) ON (B)(6) 2023. ON (B)(6) 2023 THE LENS WAS EXCHANGED FOR A TORIC LENS DUE TO PATIENT DISSATISFACTION-VISUAL ACUITY. THE REPLACEMENT LENS RESOLVED THE PROBLEM. Manufacturer Narrative: H6-CLINICAL CODE 4581: PATIENT DISSATISFACTION WITH VISUAL …
https://www.accessdata.fda.gov/scripts/cdrh/cfdocs/cfMAUDE/Detail.CFM?MDRFOI__ID=18249912&pc=MTA	2023826-2023-05298	2023-07-25 04:00:00	Injury	STAAR SURGICAL COMPANY	2023-12-01 05:00:00	MTA	IMPLANTABLE COLLAMER LENS (ICL)	Adverse Event Without Identified Device or Use Problem	Appropriate Clinical Signs, Symptoms, Conditions Term / Code Not Available	P030016	1	Event Description: THE REPORTER INDICATED THE SURGEON IMPLANTED A 12.6MM VICM5_12.6 IMPLANTABLE COLLAMER LENS, 09.50 DIOPTER, INTO THE PATIENTS LEFT EYE (OS) ON (B)(6) 2022. THE SURGEON PERFORMED AN LRI TO CORRECT ASTIGMATISM BUT THE ASTIGMATISM WAS NOT FULLY CORRECTED. THE LENS WAS REMOVED ON (B)(6) 2023 DUE TO THE PATIENT WAS DISSATISFIED WITH VISUAL ACUITY. THE LENS WAS REPLACED WITH A DIFFERE…
https://www.accessdata.fda.gov/scripts/cdrh/cfdocs/cfMAUDE/Detail.CFM?MDRFOI__ID=17655765&pc=MTA	2023826-2023-03799	2023-07-26 04:00:00	Malfunction	STAAR SURGICAL COMPANY	2023-08-30 04:00:00	MTA	IMPLANTABLE COLLAMER LENS (ICL)	Adverse Event Without Identified Device or Use Problem	Appropriate Clinical Signs, Symptoms, Conditions Term / Code Not Available	P030016	1	Event Description: THE REPORTER INDICATED THAT THE SURGEON IMPLANTED A 13.2MM VICMO13.2; -10.0 DIOPTER IMPLANTABLE COLLAMER LENS INTO THE PATIENT'S LEFT EYE (OS) ON (B)(6) 2023. THE SURGEON NOTES THERE WAS INTRAOCULAR HEMORRHAGE AND INTRAOPERATIVELY THE LENS WAS REMOVED. ON (B)(6) 2023 A REPLACEMENT LENS OF SHORTER LENGTH WAS IMPLANTED AND THIS RESOLVED THE PROBLEM. THE CAUSE OF THE EVENT WAS REP…
https://www.accessdata.fda.gov/scripts/cdrh/cfdocs/cfMAUDE/Detail.CFM?MDRFOI__ID=18376653&pc=MTA	2023826-2023-05568	2023-09-09 04:00:00	Injury	STAAR SURGICAL COMPANY	2023-12-21 05:00:00	MTA	IMPLANTABLE COLLAMER LENS (ICL)	Adverse Event Without Identified Device or Use Problem	Appropriate Clinical Signs, Symptoms, Conditions Term / Code Not Available	P030016	1	Event Description: THE REPORTER INDICATED THE SURGEON IMPLANTED A 12.1MM VICM5_12.1 IMPLANTABLE COLLAMER LENS, -02.75 DIOPTER, INTO THE PATIENTS RIGHT EYE (OD) ON (B)(6) 2023. THE LENS WAS EXPLANTED ON (B)(6) 2023 DUE TO PATIENT DISSATISFACTION WITH NEAR VISION. THE LENS WAS REPLACED WITH ANOTHER SAME MODEL/LENGTH BUT DIFFERENT DIOPTER (02.25) LENS AND THE PROBLEM WAS RESOLVED. Manufacturer Narra…
https://www.accessdata.fda.gov/scripts/cdrh/cfdocs/cfMAUDE/Detail.CFM?MDRFOI__ID=10659707&pc=MTA	2023826-2020-02350		Injury	STAAR SUGICAL COMPANY	2020-10-09 04:00:00	MTA	IMPLANTABLE COLLAMER LENS (ICL)	Adverse Event Without Identified Device or Use Problem	Appropriate Clinical Signs, Symptoms, Conditions Term / Code Not Available	P030016	1	Event Description: THE REPORTER INDICATED THAT A 12.6MM, MICL12.6,-5.0 DIOPTER IMPLANTABLE COLLAMER LENS WAS IMPLANTED INTO THE PATIENTS EYE ON (B)(6) 2020. ON (B)(6) 2020 A REMOVAL AND EXCHANGE WAS PERFORMED DUE TO SIZING AND ANGLE CLOSURE. THE REPORTER STATED " NO PERMANENT PATIENT INJURY ALTHOUGH THERE HAD BEEN TEMPORARY ANGLE CLOSURE NECESSITATING ADDITIONAL PI'S AND INTERVENTION." ADDITIONAL…
https://www.accessdata.fda.gov/scripts/cdrh/cfdocs/cfMAUDE/Detail.CFM?MDRFOI__ID=11091994&pc=MTA	2023826-2020-03227		Malfunction	STAAR SURGICAL COMPANY	2020-12-29 05:00:00	MTA	IMPLANTABLE COLLAMER LENS (ICL)	Adverse Event Without Identified Device or Use Problem	Appropriate Clinical Signs, Symptoms, Conditions Term / Code Not Available	NA#S-P#NA	1	Event Description: THE REPORTER INDICATED THE SURGEON IMPLANTED AN EVO IMPLANTABLE COLLAMER LENS, IN THE PATIENTS RIGHT EYE (OD). THE PATIENT COMPLAINED OF CENTRAL CIRCULAR DYSPHOTOPSIA. THE LENS REMAINED IMPLANTED. ADDITIONAL INFORMATION HAS BEEN REQUESTED BUT NONE HAS BEEN FORTHCOMING. IF ADDITIONAL INFORMATION IS RECEIVED, A SUPPLEMENTAL MEDWATCH WILL BE SUBMITTED. Manufacturer Narrative: CLAI…
https://www.accessdata.fda.gov/scripts/cdrh/cfdocs/cfMAUDE/Detail.CFM?MDRFOI__ID=11092002&pc=MTA	2023826-2020-03228		Malfunction	STAAR SURGICAL COMPANY	2020-12-29 05:00:00	MTA	IMPLANTABLE COLLAMER LENS (ICL)	Adverse Event Without Identified Device or Use Problem	Appropriate Clinical Signs, Symptoms, Conditions Term / Code Not Available	NA#S-P#NA	1	Event Description: THE REPORTER INDICATED THE SURGEON IMPLANTED AN EVO IMPLANTABLE COLLAMER LENS, IN THE PATIENTS LEFT EYE (OS). THE PATIENT COMPLAINED OF CENTRAL CIRCULAR DYSPHOTOPSIA. THE LENS REMAINED IMPLANTED. ADDITIONAL INFORMATION HAS BEEN REQUESTED BUT NONE HAS BEEN FORTHCOMING. IF ADDITIONAL INFORMATION IS RECEIVED, A SUPPLEMENTAL MEDWATCH WILL BE SUBMITTED. Manufacturer Narrative: CLAIM…
https://www.accessdata.fda.gov/scripts/cdrh/cfdocs/cfMAUDE/Detail.CFM?MDRFOI__ID=11651548&pc=MTA	2023826-2021-00887		Injury	STAAR SURGICAL COMPANY	2021-04-12 04:00:00	MTA	IMPLANTABLE COLLAMER LENS (ICL)	Adverse Event Without Identified Device or Use Problem	Appropriate Clinical Signs, Symptoms, Conditions Term / Code Not Available	P030016	1	Event Description: THE REPORTER INDICATED THAT THE SURGEON IMPLANTED A 13.2MM MICL 13.2, -12.0 DIOPTER, IMPLANTABLE COLLAMER LENS INTO THE PATIENT'S RIGHT EYE (OD) ON (B)(6) 2020. REPORTEDLY, LENS IS TOO BIG AND CAUSING NARROW ANGLES. SURGEON WOULD LIKE TO EXCHANGE FOR A SHORTER LENGTH LENS. LENS REMAINS IMPLANTED. ADDITIONAL INFORMATION HAS BEEN REQUESTED BUT NONE HAS BEEN FORTHCOMING. IF ADDITI…
https://www.accessdata.fda.gov/scripts/cdrh/cfdocs/cfMAUDE/Detail.CFM?MDRFOI__ID=11738951&pc=MTA	2023826-2021-01202		Malfunction	STAAR SURGICAL COMPANY	2021-04-28	MTA	IMPLANTABLE COLLAMER LENS (ICL)	Adverse Event Without Identified Device or Use Problem	Appropriate Clinical Signs, Symptoms, Conditions Term / Code Not Available	P030016	1	Event Description: THE REPORTER INDICATED THAT THE SURGEON IMPLANTED A 12.6MM MICL12.6, -12.0 DIOPTER, IMPLANTABLE COLLAMER LENS, INTO THE PATIENT'S RIGHT EYE(OD) ON (B)(6) 2021. NARROW ANGLES ARE BEING OBSERVED. LENS REMAINS IMPLANTED AND PATIENT IS UNDER OBSERVATION. PER REPORTER ON (B)(6) 2021, "ANGLE HAS OPENED MORE AND THE PRESSURE IS STABILIZED TO NORMAL. THE SURGEON IS CLOSLY WATCHING THE …
https://www.accessdata.fda.gov/scripts/cdrh/cfdocs/cfMAUDE/Detail.CFM?MDRFOI__ID=13002075&pc=MTA	2023826-2021-04802		Injury	STAAR SURGICAL COMPANY	2021-12-14 05:00:00	MTA	IMPLANTABLE COLLAMER LENS (ICL)	Adverse Event Without Identified Device or Use Problem	Appropriate Clinical Signs, Symptoms, Conditions Term / Code Not Available	NA	1	Event Description: THE REPORTER INDICATED THE SURGEON IMPLANTED A 13.2MM VICM5_13.2 IMPLANTABLE COLLAMER LENS, -09.50 DIOPTER INTO THE PATIENTS RIGHT EYE (OD) ON (B)(6) 2021. THIS LENS WAS THE REPLACEMENT LENS FOR MFR. REPORT#: 2023826-2021-03077. DUE TO IRIS PROLAPSE DURING THE EXCHANGE, THE PUPIL WAS DISTORTED TEMPORALLY OUTWARD. THE IRIS PROLAPSE HAS BEEN RESOLVED AND NO SURGICAL INTERVENTION …
https://www.accessdata.fda.gov/scripts/cdrh/cfdocs/cfMAUDE/Detail.CFM?MDRFOI__ID=13006655&pc=MTA	2023826-2021-04886		Malfunction	STAAR SURGICAL COMPANY	2021-12-14 05:00:00	MTA	IMPLANTABLE COLLAMER LENS (ICL)	Adverse Event Without Identified Device or Use Problem	Appropriate Clinical Signs, Symptoms, Conditions Term / Code Not Available		1	Event Description: THE REPORTER INDICATED THAT THE SURGEON IMPLANTED A 13.2MM VICM5_13.2; -2.50 DIOPTER IMPLANTABLE COLLAMER LENS INTO THE PATIENT'S RIGHT EYE (OD) ON (B)(6) 2021 AS A REPLACEMENT LENS. THE PATIENT EXPERIENCED "MINOR VOLCANO EFFECT" AND NOTED "BUT THE CHAMBER IS DEEP". LENS REMAINS IMPLANTED.Event Description: THE REPORTER INDICATED THAT THE SURGEON IMPLANTED A 13.2MM VICM5_13.2; …
https://www.accessdata.fda.gov/scripts/cdrh/cfdocs/cfMAUDE/Detail.CFM?MDRFOI__ID=14150295&pc=MTA	2023826-2022-01240		Malfunction	STAAR SURGICAL COMPANY	2022-04-19 04:00:00	MTA	IMPLANTABLE COLLAMER LENS (ICL)	Adverse Event Without Identified Device or Use Problem	Appropriate Clinical Signs, Symptoms, Conditions Term / Code Not Available	NA	1	Event Description: THE REPORTER INDICATED THAT THE A PATIENT EXPERIENCED RETINAL DETACHMENT AFTER ICL IMPLANTATION 3 OR 4 MONTHS POST OP. REPORTEDLY IT HAS BEEN FIXED AND DOCTOR BELIEVES IT IS OKAY. Manufacturer Narrative: PATIENT IDENTIFIER-RACE: UNK. DATE OF EVENT: UNK. EXPIRATION DATE, IMPLANT DATE, EXPLANT DATE: UNK. CLAIM#: (B)(4). Manufacturer Narrative: (B)(4).
https://www.accessdata.fda.gov/scripts/cdrh/cfdocs/cfMAUDE/Detail.CFM?MDRFOI__ID=14220985&pc=MTA	2023826-2022-01152		Injury	STAAR SURGICAL COMPANY	2022-04-27 04:00:00	MTA	IMPLANTABLE COLLAMER LENS (ICL)	Adverse Event Without Identified Device or Use Problem	Appropriate Clinical Signs, Symptoms, Conditions Term / Code Not Available	NA	1	Event Description: REPORTS FOR REDUCTION IN ENDOTHELIAL CELL COUNT IN PATIENTS RIGHT EYE. SEE MFR. REP#2023826-2022-01153 FOR FELLOW EYE. LENS REMAINS IMPLANTED. Manufacturer Narrative: (B)(4). CLAIM# (B)(4).
https://www.accessdata.fda.gov/scripts/cdrh/cfdocs/cfMAUDE/Detail.CFM?MDRFOI__ID=14221078&pc=MTA	2023826-2022-01153		Injury	STAAR SURGICAL COMPANY	2022-04-27 04:00:00	MTA	IMPLANTABLE COLLAMER LENS (ICL)	Adverse Event Without Identified Device or Use Problem	Appropriate Clinical Signs, Symptoms, Conditions Term / Code Not Available	NA	1	Event Description: REPORTS FOR REDUCTION IN ENDOTHELIAL CELL COUNT IN PATIENTS LEFT EYE. SEE MFR. REP#2023826-2022-01152 FOR FELLOW EYE. LENS REMAINS IMPLANTED. Manufacturer Narrative: (B)(4). CLAIM# (B)(4).
https://www.accessdata.fda.gov/scripts/cdrh/cfdocs/cfMAUDE/Detail.CFM?MDRFOI__ID=15153632&pc=MTA	2023826-2022-02509		Injury	STAAR SURGICAL COMPANY	2022-08-02 04:00:00	MTA	IMPLANTABLE COLLAMER LENS (ICL)	Adverse Event Without Identified Device or Use Problem	Appropriate Clinical Signs, Symptoms, Conditions Term / Code Not Available	NA	1	Event Description: THE REPORTER INDICATED THE SURGEON IMPLANTED A 12.6MM VICM6_12.6 IMPLANTABLE COLLAMER LENS, -08.50 DIOPTER INTO THE PATIENTS RIGHT EYE (OD) ON (B)(6) 2021. THE LENS WAS EXPLANTED ON (B)(6) 2022 DUE TO PATIENT EXPERIENCED PERMANENT LOSS OF BCVA AND THE PROBLEM WAS RESOLVED. THE PATIENT HAD A REFRACTIVE LENS EXCHANGE WITH A TRIFOCAL LIO. THE CAUSE OF THE EVENT WAS UNKNOWN. Manufa…
https://www.accessdata.fda.gov/scripts/cdrh/cfdocs/cfMAUDE/Detail.CFM?MDRFOI__ID=15414373&pc=MTA	2023826-2022-03108		Injury	STAAR SURGICAL COMPANY	2022-09-13 04:00:00	MTA	IMPLANTABLE COLLAMER LENS (ICL)	Adverse Event Without Identified Device or Use Problem	Appropriate Clinical Signs, Symptoms, Conditions Term / Code Not Available	P030016	1	Event Description: THE REPORTER INDICATED THAT THE SURGEON IMPLANTED AN IMPLANTABLE COLLAMER LENS INTO THE PATIENT'S RIGHT EYE (OD). THE SURGEON REPORTS THE PATIENT IS HAVING DIFFICULTY READING/SEEING; AND WAS PRESCRIBED MULTIPLE MEDICATIONS WITH A PLANNED FOLLOW UP VISIT. LENS REMAINS IMPLANTED. ATTEMPTS TO OBTAIN ADDITIONAL INFORMATION HAVE NOT BEEN SUCCESSFUL. IF ADDITIONAL INFORMATION IS RECE…
https://www.accessdata.fda.gov/scripts/cdrh/cfdocs/cfMAUDE/Detail.CFM?MDRFOI__ID=15498836&pc=MTA	2023826-2022-03340		Malfunction	STAAR SURGICAL COMPANY	2022-09-28 04:00:00	MTA	IMPLANTABLE COLLAMER LENS (ICL)	Adverse Event Without Identified Device or Use Problem	Appropriate Clinical Signs, Symptoms, Conditions Term / Code Not Available	P030016	1	Event Description: THE REPORTER INDICATED THAT A 12.6MM VICM5_12.6 IMPLANTABLE COLLAMER LENS -8.5 DIOPTER WAS IMPLANTED INTO THE PATIENT'S RIGHT EYE (OD) ON (B)(6) 2022 AS A REPLACEMENT LENS TO ADDRESS LOW VAULT. THE LOW VAULT ISSUE WAS RESOLVED BUT " MILD MYDRIASIS DUE TO SECTORAL ATROPHY OF THE PUPILLARY SPHINCTER " WAS REPORTED FOR STATUS OF THE EYE (SIGNS/SYMPTOMS). ADDITIONAL INFORMATION HAS…
https://www.accessdata.fda.gov/scripts/cdrh/cfdocs/cfMAUDE/Detail.CFM?MDRFOI__ID=15555886&pc=MTA	2023826-2022-03513		Malfunction	STAAR SURGICAL COMPANY	2022-10-06 04:00:00	MTA	IMPLANTABLE COLLAMER LENS (ICL)	Adverse Event Without Identified Device or Use Problem	Appropriate Clinical Signs, Symptoms, Conditions Term / Code Not Available	P030016	1	Event Description: THE REPORTER INDICATED THAT A 13.2MM, VICM5_13.2, -5.50 DIOPTER IMPLANTABLE COLLAMER LENS WAS IMPLANTED INTO THE PATIENTS LEFT EYE (OS) ON (B)(6) 2022 AS A REPLACEMENT LENS TO ADDRESS LOW VAULT. IT WAS REPORTED THAT THE VAULT ISSUE RESOLVED BUT FOR SATUS OF THE EYE (SIGNS/SYMPTOMS) THE REPORTER STATED " PERSISTENT RESIDUAL ASTIGMATISM." ADDITIONAL INFORMATION HAS BEEN REQUESTED…
https://www.accessdata.fda.gov/scripts/cdrh/cfdocs/cfMAUDE/Detail.CFM?MDRFOI__ID=16603911&pc=MTA	2023826-2023-00946		Injury	STAAR SURGICAL COMPANY	2023-03-23 04:00:00	MTA	IMPLANTABLE COLLAMER LENS (ICL)	Adverse Event Without Identified Device or Use Problem	Appropriate Clinical Signs, Symptoms, Conditions Term / Code Not Available	P030016	1	Event Description: THE REPORTER INDICATED THE SURGEON IMPLANTED AND REMOVED AN ICL IMPLANTABLE COLLAMER LENS, DUE TO THE SURGEON NOTED PIGMENT DISPERSION. ADDITIONAL INFORMATION HAS BEEN REQUESTED BUT NONE HAS BEEN FORTHCOMING. Manufacturer Narrative: ADDITONAL DATA: B5- THE REPORTER INDICATED THAT THE SURGEON IMPLANTED AN IMPLANTABLE COLLAMER LENS INTO THE PATIENT'S EYE. THE PATIENT EXPERIENCED …
https://www.accessdata.fda.gov/scripts/cdrh/cfdocs/cfMAUDE/Detail.CFM?MDRFOI__ID=16769941&pc=MTA	2023826-2023-01373		Malfunction	STAAR SURGICAL COMPANY	2023-04-19 04:00:00	MTA	IMPLANTABLE COLLAMER LENS (ICL)	Adverse Event Without Identified Device or Use Problem	Appropriate Clinical Signs, Symptoms, Conditions Term / Code Not Available	P030016	1	Event Description: RECEIVED A COPY OF AN ARTICLE IN REGARD TO "A HYPOTHESES TO EXPLAIN ACUTE ADJUSTMENT DISORDER AFTER PHAKIC INTRAOCULAR LENS IMPLANTATION IN A HIGHLY MYOPIC PATIENT: POTENTIAL CAUSES AND SUGGESTED REMEDIES". THE ARTICLE INVOLVED A 35 YEAR OLD FEMALE WITH HIGH MYOPIA FOLLOWING POST BILATERAL ICL PLACEMENT. AT ONE WEEK POST-OP, THE PATIENT WAS HAVING DIFFICULTY ADJUSTING TO THE VI…
https://www.accessdata.fda.gov/scripts/cdrh/cfdocs/cfMAUDE/Detail.CFM?MDRFOI__ID=16925028&pc=MTA	2023826-2023-01809		Malfunction	STAAR SURGICAL COMPANY	2023-05-12 04:00:00	MTA	IMPLANTABLE COLLAMER LENS (ICL)	Adverse Event Without Identified Device or Use Problem	Appropriate Clinical Signs, Symptoms, Conditions Term / Code Not Available	P030016	1	Event Description: RECEIVED A VOLUNTARY MEDICAL DEVICE REPORT FROM FDA- MDR REPORT # MW5116464 ON 13-APR-2023. THE PATIENT REPORTED ON (B)(6) 2023, A "SERIOUS INJURY" EVENT REPORT WITH OUTCOMES OF "DISABILITY OR PERMANENT DAMAGE". THE PATIENT STATED "HAD STAAR MEDICAL'S IMPLANTABLE COLLAMER LENS, EVO ICL IMPLANTED INTO BOTH RIGHT AND LEFT EYE. NOTICED NEXT DAY A LOSS OF PERIPHERAL VISION. RETURNE…
https://www.accessdata.fda.gov/scripts/cdrh/cfdocs/cfMAUDE/Detail.CFM?MDRFOI__ID=16925033&pc=MTA	2023826-2023-01810		Malfunction	STAAR SURGICAL COMPANY	2023-05-12 04:00:00	MTA	IMPLANTABLE COLLAMER LENS (ICL)	Adverse Event Without Identified Device or Use Problem	Appropriate Clinical Signs, Symptoms, Conditions Term / Code Not Available	P030016	1	Event Description: RECEIVED A VOLUNTARY MEDICAL DEVICE REPORT FROM FDA- MDR REPORT # MW5116465 ON 13-APR-2023. THE PATIENT REPORTED ON (B)(6) 2023, A "SERIOUS INJURY" EVENT REPORT WITH OUTCOMES OF "DISABILITY OR PERMANENT DAMAGE". THE PATIENT STATED "HAD STAAR MEDICAL'S IMPLANTABLE COLLAMER LENS, EVO ICL IMPLANTED INTO BOTH RIGHT AND LEFT EYE. NOTICED NEXT DAY A LOSS OF PERIPHERAL VISION. RETURNE…
https://www.accessdata.fda.gov/scripts/cdrh/cfdocs/cfMAUDE/Detail.CFM?MDRFOI__ID=12222300&pc=MTA	2023826-2021-02817	2021-06-07 04:00:00	Injury	STAAR SURGICAL COMPANY	2021-07-23 04:00:00	MTA	IMPLANTABLE COLLAMER LENS (ICL)	Adverse Event Without Identified Device or Use Problem; No Apparent Adverse Event	Appropriate Clinical Signs, Symptoms, Conditions Term / Code Not Available	N/A	1	Event Description: THE REPORTER INDICATED THAT THE SURGEON IMPLANTED A 13.2MM VICM6_13.2 IMPLANTABLE COLLAMER LENS, -6.5 DIOPTER INTO THE PATIENT'S RIGHT EYE (OD). THE SURGEON REPORTS THE PATIENT IS UNHAPPY WITH THE VISUAL OUTCOME. REPORTEDLY, THE LENS REMAINS IMPLANTED. Manufacturer Narrative: B1: UPDATED; B5: UPDATED INFORMATION: ON (B)(6) 2021, THE LENS WAS EXCHANGED WITH A SAME SIZE DIFFERENT…
https://www.accessdata.fda.gov/scripts/cdrh/cfdocs/cfMAUDE/Detail.CFM?MDRFOI__ID=12457497&pc=MTA	2023826-2021-03549	2021-08-17 04:00:00	Injury	STAAR SURGICAL COMPANY	2021-09-10 04:00:00	MTA	IMPLANTABLE COLLAMER LENS (ICL)	Adverse Event Without Identified Device or Use Problem; No Apparent Adverse Event	Appropriate Clinical Signs, Symptoms, Conditions Term / Code Not Available	N/A	1	Event Description: THE REPORTER INDICATED THAT THE SURGEON IMPLANTED A 13.2MM VICM5_13.2 IMPLANTABLE COLLAMER LENS, -9.5 DIOPTER INTO THE PATIENT'S RIGHT EYE (OD) ON (B)(6) 2020. THE SURGEON REPORTS IRIS TRANSILLUMINATION DEFECTS. REPORTEDLY, THE LENS REMAINS IMPLANTED AND THE PATIENT IS SATISFIED WITH THEIR VISION; NO OTHER SYMPTOMS. THE CAUSE OF THE EVENT IS REPORTED AS DEVICE. Manufacturer Nar…
https://www.accessdata.fda.gov/scripts/cdrh/cfdocs/cfMAUDE/Detail.CFM?MDRFOI__ID=13795209&pc=MTA	2023826-2022-00794		Injury	STAAR SURGICAL COMPANY	2022-03-17 04:00:00	MTA	IMPLANTABLE COLLAMER LENS (ICL)	Adverse Event Without Identified Device or Use Problem; No Apparent Adverse Event	Appropriate Clinical Signs, Symptoms, Conditions Term / Code Not Available	NA	1	Event Description: THE REPORTER INDICATED THE SURGEON IMPLANTED AN ICL IMPLANTABLE COLLAMER LENS INTO THE PATIENTS EYE. THE PATIENT WAS NOT HAPPY WITH HER QUALITY OF VISION AS HER DISTANCE WAS DOWN 2 LINES. THE SURGEON IS PLANNING TO EXPLANT AND EXCHANGE THE LENS. THE LENS REMAINED IMPLANTED. ADDITIONAL INFORMATION HAS BEEN REQUESTED BUT NONE HAS BEEN FORTHCOMING. Manufacturer Narrative: B5- PER …
https://www.accessdata.fda.gov/scripts/cdrh/cfdocs/cfMAUDE/Detail.CFM?MDRFOI__ID=14221081&pc=MTA	2023826-2022-01154		Injury	STAAR SURGICAL COMPANY	2022-04-27 04:00:00	MTA	IMPLANTABLE COLLAMER LENS (ICL)	Device Dislodged or Dislocated	Appropriate Clinical Signs, Symptoms, Conditions Term / Code Not Available	NA	1	Event Description: REPORTS OF LENS ROTATION AND BLOCKING PI IN RIGHT EYE. PLANNED LENS EXCHANGE. SEE MFR. REP# 2023826-2022-01155 FOR FELLOW EYE. LENS REMAINS IMPLANTED. Manufacturer Narrative: PATIENT IDENTIFIER: UNKNOWN, AGE OR DATE OF BIRTH: UNKNOWN, SEX: UNKNOWN, WEIGHT: UNKNOWN, ETHNICITY: UNKNOWN, RACE: UNKNOWN. DATE OF EVENT: UNKNOWN. MODEL, IMPLANT DATE, EXPLANT DATE: UNKNOWN. (B)(4). CLA…
https://www.accessdata.fda.gov/scripts/cdrh/cfdocs/cfMAUDE/Detail.CFM?MDRFOI__ID=14221127&pc=MTA	2023826-2022-01155		Injury	STAAR SURGICAL COMPANY	2022-04-27 04:00:00	MTA	IMPLANTABLE COLLAMER LENS (ICL)	Device Dislodged or Dislocated	Appropriate Clinical Signs, Symptoms, Conditions Term / Code Not Available	NA	1	Event Description: REPORTS OF LENS ROTATION AND BLOCKING PI IN LEFT EYE. PLANNED LENS EXCHANGE. SEE MFR. REP#2023826-2022-01154 FOR FELLOW EYE. LENS REMAINS IMPLANTED. Manufacturer Narrative: (B)(4). CLAIM# (B)(4). Manufacturer Narrative: CLAIM# (B)(4).
https://www.accessdata.fda.gov/scripts/cdrh/cfdocs/cfMAUDE/Detail.CFM?MDRFOI__ID=11878443&pc=MTA	2023826-2021-01611	2017-06-12	Injury	STAAR SURGICAL COMPANY	2021-05-25	MTA	IMPLANTABLE COLLAMER LENS (ICL)	Inadequacy of Device Shape and/or Size	Appropriate Clinical Signs, Symptoms, Conditions Term / Code Not Available	N/A	1	Event Description: THE REPORTER INDICATED THAT THE SURGEON IMPLANTED A 13.7MM VICMO13.2, IMPLANTABLE COLLAMER LENS INTO THE PATIENT'S RIGHT EYE (OD) ON (B)(6) 2017. THE LENS WAS EXCHANGED WITH A SHORTER LENGTH LENS DUE TO SIGNIFICANT REDUCTION OF ENDOTHELIAL CELL COUNT OR SIGNIFICANT ENDOTHELIAL CELL LOSS AND EXCESSIVE VAULT ON (B)(6) 2019. THIS RESOLVED THE PROBLEM.CAUSE OF THE EVENT IS REPORTED…
https://www.accessdata.fda.gov/scripts/cdrh/cfdocs/cfMAUDE/Detail.CFM?MDRFOI__ID=11878372&pc=MTA	2023826-2021-01612	2017-06-26	Injury	STAAR SURGICAL COMPANY	2021-05-25	MTA	IMPLANTABLE COLLAMER LENS (ICL)	Inadequacy of Device Shape and/or Size	Appropriate Clinical Signs, Symptoms, Conditions Term / Code Not Available	N/A	1	Event Description: THE REPORTER INDICATED THAT THE SURGEON IMPLANTED A 13.7MM VICMO13.7, -1700 DIOPTER, IMPLANTABLE COLLAMER LENS INTO THE PATIENT'S LEFT EYE (OS) ON (B)(6) 2017. SIGNIFICANT REDUCTION OF ENDOTHELIAL CELL COUNT OR SIGNIFICANT ENDOTHELIAL CELL LOSS AND EXCESSIVE VAULT WERE OBSERVED. THE LENS REMAINS IMPLANTED. CAUSE OF THE EVENT IS REPORTED AS UNKNOWN. REPORTEDLY, THERE ARE PLANS T…
https://www.accessdata.fda.gov/scripts/cdrh/cfdocs/cfMAUDE/Detail.CFM?MDRFOI__ID=11405440&pc=MTA	2023826-2021-00554	2020-04-23	Injury	STAAR SURGICAL COMPANY	2021-03-03	MTA	IMPLANTABLE COLLAMER LENS (ICL)	Inadequacy of Device Shape and/or Size	Appropriate Clinical Signs, Symptoms, Conditions Term / Code Not Available	NA#S-P#NA	1	Event Description: THE REPORTER INDICATED THE SURGEON IMPLANTED A 13.2MM VICMO13.2 IMPLANTABLE COLLAMER LENS, -05.50 DIOPTER, IN THE PATIENTS LEFT EYE (OS), ON (B)(6) 2017. THE LENS WAS EXPLANTED ON (B)(6) 2020 DUE TO EXCESSIVE VAULTING AND SIGNIFICANT REDUCTION OF IRIDO-CORNEAL ANGLES. THE LENS WAS EXCHANGED FOR A SHORTER LENS AND THE PROBLEM WAS RESOLVED. THE CAUSE OF THE EVENT WAS UNKNOWN. Man…
https://www.accessdata.fda.gov/scripts/cdrh/cfdocs/cfMAUDE/Detail.CFM?MDRFOI__ID=10619476&pc=MTA	2023826-2020-02276	2020-07-13 04:00:00	Injury	STAAR SURGICAL COMPANY	2020-10-02 04:00:00	MTA	IMPLANTABLE COLLAMER LENS (ICL)	Inadequacy of Device Shape and/or Size	Appropriate Clinical Signs, Symptoms, Conditions Term / Code Not Available	N/A	1	Event Description: THE REPORTER INDICATED THAT A 13.2 MM, VICMO13.2, -15.50 DIOPTER, IMPLANTABLE COLLAMER LENS WAS IMPLANTED INTO THE PATIENTS RIGHT EYE (OD) ON (B)(6) 2020. ON (B)(6) 2020 THE LENS WAS EXCHANGED FOR A SHORTER LENGTH LENS DUE TO EXCESSIVE VAULT AND SIGNIFICANT REDUCTION OF IRIDO-CORNEAL ANGLES. THIS EXCHANGE RESOLVED THE PROBLEM. Manufacturer Narrative: ADDITIONAL INFORMATION: H3-…
https://www.accessdata.fda.gov/scripts/cdrh/cfdocs/cfMAUDE/Detail.CFM?MDRFOI__ID=10639546&pc=MTA	2023826-2020-02304	2020-08-20 04:00:00	Injury	STAAR SURGICAL COMPANY	2020-10-06 04:00:00	MTA	IMPLANTABLE COLLAMER LENS (ICL)	Inadequacy of Device Shape and/or Size	Appropriate Clinical Signs, Symptoms, Conditions Term / Code Not Available	NA	1	Event Description: THE REPORTER INDICATED THAT A 13.2MM, VICM5_13.2, -11.50 DIOPTER, IMPLANTABLE COLLAMER LENS WAS IMPLANTED INTO THE PATIENTS LEFT EYE (OS) ON (B)(6) 2020. ON (B)(6) 2020 THE LENS WAS EXCHANGED FOR A SHORTER LENGTH LENS DUE TO EXCESSIVE VAULT AND SIGNIFICANT REDUCTION OF IRIDO-CORNEAL ANGLES. THIS EXCHANGE RESOLVED THE PROBLEM. Manufacturer Narrative: H3- DEVICE EVALUATION: LENS …
https://www.accessdata.fda.gov/scripts/cdrh/cfdocs/cfMAUDE/Detail.CFM?MDRFOI__ID=10755792&pc=MTA	2023826-2020-02465	2020-09-08 04:00:00	Injury	STAAR SURGICAL COMPANY	2020-10-29 04:00:00	MTA	IMPLANTABLE COLLAMER LENS (ICL)	Inadequacy of Device Shape and/or Size	Appropriate Clinical Signs, Symptoms, Conditions Term / Code Not Available	N/A	1	Event Description: THE REPORTER INDICATED THAT A 13.2MM, VICH13.2, +02.75 DIOPTER, IMPLANTABLE COLLAMER LENS WAS IMPLANTED INTO THE PATIENT'S RIGHT EYE (OD) ON (B)(6) 2020. SIGNIFICANT REDUCTION OF IRIDO-CORNEAL ANGELS AND EXCESSIVE VAULT WERE OBSERVED, THE LENS WAS REMOVED AND EXCHANGED FOR A SHORTER LENGTH LENS ON (B)(6) 2020 AND THE PROBLEM WAS RESOLVED. CAUSE OF THE EVENT IS REPORTED AS UNKNO…
https://www.accessdata.fda.gov/scripts/cdrh/cfdocs/cfMAUDE/Detail.CFM?MDRFOI__ID=10755801&pc=MTA	2023826-2020-02466	2020-09-08 04:00:00	Injury	STAAR SURGICAL COMPANY	2020-10-29 04:00:00	MTA	IMPLANTABLE COLLAMER LENS (ICL)	Inadequacy of Device Shape and/or Size	Appropriate Clinical Signs, Symptoms, Conditions Term / Code Not Available	N/A	1	Event Description: THE REPORTER INDICATED THAT A 13.2MM, VICH13.2, +04.00 DIOPTER, IMPLANTABLE COLLAMER LENS WAS IMPLANTED INTO THE PATIENT'S LEFT EYE (OS) ON (B)(6) 2020. SIGNIFICANT REDUCTION OF IRIDO-CORNEAL ANGELS AND EXCESSIVE VAULT WERE OBSERVED, THE LENS WAS REMOVED AND EXCHANGED FOR A SHORTER LENGTH LENS ON (B)(6) 2020 AND THE PROBLEM WAS RESOLVED. CAUSE OF THE EVENT IS REPORTED AS UNKNOW…
https://www.accessdata.fda.gov/scripts/cdrh/cfdocs/cfMAUDE/Detail.CFM?MDRFOI__ID=10980484&pc=MTA	2023826-2020-02940	2020-09-13 04:00:00	Injury	STAAR SURGICAL COMPANY	2020-12-09 05:00:00	MTA	IMPLANTABLE COLLAMER LENS (ICL)	Inadequacy of Device Shape and/or Size	Appropriate Clinical Signs, Symptoms, Conditions Term / Code Not Available	N/A	1	Event Description: THE REPORTER INDICATED THE SURGEON IMPLANTED A 13.2MM VICMO13.2 IMPLANTABLE COLLAMER LENS, DIOPTER -2.75 INTO THE PATIENT'S LEFT EYE (OS) ON (B)(6) 2020. ON (B)(6) 2020 THE LENS WAS EXCHANGED WITH A SHORTER LENS DUE TO EXCESSIVE VAULT AND SIGNIFICANT REDUCTION OF IRIDO-CORNEAL ANGLES (ICA) AND THE PROBLEM WAS RESOLVED. THE CAUSE OF THE EVENT IS REPORTED AS UNKNOWN. Manufacturer…
https://www.accessdata.fda.gov/scripts/cdrh/cfdocs/cfMAUDE/Detail.CFM?MDRFOI__ID=10980525&pc=MTA	2023826-2020-02939	2020-09-13 04:00:00	Injury	STAAR SURGICAL COMPANY	2020-12-09 05:00:00	MTA	IMPLANTABLE COLLAMER LENS (ICL)	Inadequacy of Device Shape and/or Size	Appropriate Clinical Signs, Symptoms, Conditions Term / Code Not Available	N/A	1	Event Description: THE REPORTER INDICATED THE SURGEON IMPLANTED A 13.2MM VICMO13.2 IMPLANTABLE COLLAMER LENS, DIOPTER -3.0 INTO THE PATIENT'S RIGHT EYE (OD) ON (B)(6) 2020. ON (B)(6) 2020 THE LENS WAS EXCHANGED WITH A SHORTER LENS DUE TO EXCESSIVE VAULT AND SIGNIFICANT REDUCTION OF IRIDO-CORNEAL ANGLES (ICA) AND THE PROBLEM WAS RESOLVED. THE CAUSE OF THE EVENT IS REPORTED AS UNKNOWN. Manufacturer…
https://www.accessdata.fda.gov/scripts/cdrh/cfdocs/cfMAUDE/Detail.CFM?MDRFOI__ID=11405412&pc=MTA	2023826-2021-00553	2020-10-05 04:00:00	Injury	STAAR SURGICAL COMPANY	2021-03-03 05:00:00	MTA	IMPLANTABLE COLLAMER LENS (ICL)	Inadequacy of Device Shape and/or Size	Appropriate Clinical Signs, Symptoms, Conditions Term / Code Not Available	NA#S-P#NA	1	Event Description: THE REPORTER INDICATED THE SURGEON IMPLANTED A 12.6MM VICMO12.6 IMPLANTABLE COLLAMER LENS, -07.50 DIOPTER, IN THE PATIENTS RIGHT EYE (OD), ON (B)(6) 2020. THE LENS WAS EXPLANTED ON (B)(6) 2020 DUE TO EXCESSIVE VAULTING AND SIGNIFICANT REDUCTION OF IRIDO-CORNEAL ANGLES. THE LENS WAS EXCHANGED FOR A SHORTER LENS AND THE PROBLEM WAS RESOLVED. THE CAUSE OF THE EVENT WAS UNKNOWN. Ma…
https://www.accessdata.fda.gov/scripts/cdrh/cfdocs/cfMAUDE/Detail.CFM?MDRFOI__ID=10989738&pc=MTA	2023826-2020-02967	2020-11-11	Injury	STAAR SURGICAL COMPANY	2020-12-11	MTA	IMPLANTABLE COLLAMER LENS (ICL)	Inadequacy of Device Shape and/or Size	Appropriate Clinical Signs, Symptoms, Conditions Term / Code Not Available	NA	1	Event Description: THE REPORTER INDICATED THAT A 12.6MM, VICM5_12.6, -7.00 DIOPTER, IMPLANTABLE COLLAMER LENS WAS IMPLANTED INTO THE PATIENTS RIGHT EYE (OD) ON (B)(6) 2020. MEDICAL INTERVENTION (DIAMOX) WAS PRESCRIBED DUE TO HIGH VAULT ONE DAY POST OP. LENS REMAINS IMPLANTED. IT WAS REPORTED THAT PERIPHERAL ANTERIOR CHAMBER IS SHALLOW AND THAT THE DOCTOR WILL MONITOR CLOSELY. IF ADDITIONAL INFORM…
https://www.accessdata.fda.gov/scripts/cdrh/cfdocs/cfMAUDE/Detail.CFM?MDRFOI__ID=11161162&pc=MTA	2023826-2021-00129	2020-11-21	Malfunction	STAAR SURGICAL COMPANY	2021-01-13	MTA	IMPLANTABLE COLLAMER LENS (ICL)	Inadequacy of Device Shape and/or Size	Appropriate Clinical Signs, Symptoms, Conditions Term / Code Not Available	NA	1	Event Description: THE REPORTER INDICATED THAT A 13.7MM, VICM5_13.7, -8.00 DIOPTER, IMPLANTABLE COLLAMER LENS WAS IMPLANTED INTO THE PATIENTS LEFT EYE (OS) ON (B)(6) 2020. EXCESSIVE VAULT WAS OBSERVED. FOR STATUS OF THE EYE (SIGNS/SYMPTOMS) THE REPORTER STATED " NORMAL - SHALLOW AC, AC DEPTH PREOPERATIVE 3.87 AC DEPTH POSTOPERATIVE 2.6". ADDITIONAL INFORMATION HAS BEEN REQUESTED BUT NONE HAS BEEN…
https://www.accessdata.fda.gov/scripts/cdrh/cfdocs/cfMAUDE/Detail.CFM?MDRFOI__ID=12102590&pc=MTA	2023826-2021-02135	2020-11-26	Injury	STAAR SURGICAL COMPANY	2021-07-01	MTA	IMPLANTABLE COLLAMER LENS (ICL)	Inadequacy of Device Shape and/or Size	Appropriate Clinical Signs, Symptoms, Conditions Term / Code Not Available	N/A	1	Event Description: THE REPORTER INDICATED THAT THE SURGEON IMPLANTED A 13.2MM VICM5 13.2, -07.50 DIOPTER, IMPLANTABLE COLLAMER LENS INTO THE PATIENT'S LEFT EYE (OS) ON (B)(6) 2020. THE LENS WAS REPLACED WITH A SHORTER LENGTH LENS DUE TO EXCESSIVE VAULT AND NARROW ANGLE ON (B)(6)2021. THIS RESOLVED THE PROBLEM. CAUSE OF THE EVENT IS REPORTED AS PATIENT RELATED FACTOR, "BIOLOGIC VARIATION." Manufac…
https://www.accessdata.fda.gov/scripts/cdrh/cfdocs/cfMAUDE/Detail.CFM?MDRFOI__ID=11556080&pc=MTA	2023826-2021-00746	2020-12-15 05:00:00	Malfunction	STAAR SURGICAL COMPANY	2021-03-23 04:00:00	MTA	IMPLANTABLE COLLAMER LENS (ICL)	Inadequacy of Device Shape and/or Size	Appropriate Clinical Signs, Symptoms, Conditions Term / Code Not Available	NA	1	Event Description: THE REPORTER INDICATED THE SURGEON INSERTED AND REMOVED A 13.2MM VICMO13.2 IMPLANTABLE COLLAMER LENS, -06.50 DIOPTER, WITHIN THE SAME SURGERY DUE TO EXCESSIVE VAULTING AND SIGNIFICANT REDUCTION OF IRIDO-CORNEAL ANGLES. THE LENS WAS REPLACED DURING THE SAME SURGERY WITH A SHORTER LENS AND THE PROBLEM WAS RESOLVED. CAUSE OF THE EVENT WAS UNKNOWN. Manufacturer Narrative: H3 - DEVI…
https://www.accessdata.fda.gov/scripts/cdrh/cfdocs/cfMAUDE/Detail.CFM?MDRFOI__ID=12271707&pc=MTA	2023826-2021-03037	2021-02-10	Injury	STAAR SURGICAL COMPANY	2021-08-03	MTA	IMPLANTABLE COLLAMER LENS (ICL)	Inadequacy of Device Shape and/or Size	Appropriate Clinical Signs, Symptoms, Conditions Term / Code Not Available	NA	1	Event Description: THE REPORTER INDICATED THE SURGEON IMPLANTED A 13.2MM VICH13.2 IMPLANTABLE COLLAMER LENS, +05.50 DIOPTER, INTO THE PATIENTS LEFT EYE (OS), ON (B)(6) 2021. THE LENS WAS EXPLANTED ON (B)(6) 2021 DUE TO EXCESSIVE VAULTING AND SIGNIFICANT REDUCTION OF IRIDO-CORNEAL ANGLES. THE LENS WAS REPLACED WITH A SHORTER LENS AND THE PROBLEM WAS RESOLVED. THE CAUSE OF THE EVENT WAS UNKNOWN. Ma…
https://www.accessdata.fda.gov/scripts/cdrh/cfdocs/cfMAUDE/Detail.CFM?MDRFOI__ID=11722565&pc=MTA	2023826-2021-01210	2021-03-16 04:00:00	Injury	STAAR SURGICAL COMPANY	2021-04-26 04:00:00	MTA	IMPLANTABLE COLLAMER LENS (ICL)	Inadequacy of Device Shape and/or Size	Appropriate Clinical Signs, Symptoms, Conditions Term / Code Not Available	NA	1	Event Description: THE REPORTER INDICATED THAT A 13.2MM, VICMO13.2, -18.00 DIOPTER, IMPLANTABLE COLLAMER LENS WAS IMPLANTED INTO THE PATIENTS RIGHT EYE (OD) ON (B)(6) 2021. ON (B)(6) 2021 THE LENS WAS EXCHANGED FOR A SHORTER LENGTH LENS DUE TO EXCESSIVE VAULT AND SIGNIFICANT REDUCTION OF IRIDO-CORNEAL ANGLES. THIS EXCHANGE DID NOT RESOLVE THE PROBLEM. Manufacturer Narrative: ADDITIONAL INFORMATIO…
https://www.accessdata.fda.gov/scripts/cdrh/cfdocs/cfMAUDE/Detail.CFM?MDRFOI__ID=11938943&pc=MTA	2023826-2021-01643	2021-04-06	Injury	STAAR SURGICAL COMPANY	2021-06-04	MTA	IMPLANTABLE COLLAMER LENS (ICL)	Inadequacy of Device Shape and/or Size	Appropriate Clinical Signs, Symptoms, Conditions Term / Code Not Available	N/A	1	Event Description: THE REPORTER INDICATED THAT THE SURGEON IMPLANTED A 13.2MM VICMO 13.2, -15.00 DIOPTER, IMPLANTABLE COLLAMER LENS INTO THE PATIENT'S LEFT EYE (OS) ON (B)(6) 2021. THE LENS WAS EXCHANGED WITH A SHORTER LENGTH LENS DUE TO SIGNIFICANT REDUCTION OF IRIDO-CORNEAL ANGLES AND EXCESSIVE VAULT ON (B)(6) 2021. THIS RESOLVED THE PROBLEM. CAUSE OF THE EVENT IS REPORTED AS DEVICE, NOT ACCURA…
https://www.accessdata.fda.gov/scripts/cdrh/cfdocs/cfMAUDE/Detail.CFM?MDRFOI__ID=11938948&pc=MTA	2023826-2021-01642	2021-04-06	Injury	STAAR SURGICAL COMPANY	2021-06-04	MTA	IMPLANTABLE COLLAMER LENS (ICL)	Inadequacy of Device Shape and/or Size	Appropriate Clinical Signs, Symptoms, Conditions Term / Code Not Available	N/A	1	Event Description: THE REPORTER INDICATED THAT THE SURGEON IMPLANTED A 13.2MM VICM5 13.2, -12.50 DIOPTER, IMPLANTABLE COLLAMER LENS INTO THE PATIENT'S RIGHT EYE (OD) ON (B)(6) 2021. THE LENS WAS EXCHANGED WITH A SHORTER LENGTH LENS DUE TO SIGNIFICANT REDUCTION OF IRIDO-CORNEAL ANGLES AND EXCESSIVE VAULT ON (B)(6) 2021. THIS RESOLVED THE PROBLEM. CAUSE OF THE EVENT IS REPORTED AS DEVICE, NOT ACCUR…
https://www.accessdata.fda.gov/scripts/cdrh/cfdocs/cfMAUDE/Detail.CFM?MDRFOI__ID=11855169&pc=MTA	2023826-2021-01505	2021-04-06 04:00:00	Injury	STAAR SURGICAL COMPANY	2021-05-20 04:00:00	MTA	IMPLANTABLE COLLAMER LENS (ICL)	Inadequacy of Device Shape and/or Size	Appropriate Clinical Signs, Symptoms, Conditions Term / Code Not Available	N/A	1	Event Description: THE REPORTER INDICATED THAT THE SURGEON IMPLANTED A 12.6MM VICMO12.6, -09.00 DIOPTER, IMPLANTABLE COLLAMER LENS INTO THE PATIENT'S RIGHT EYE (OD) ON (B)(6) 2021. THE LENS WAS EXPLANTED DUE TO LOW VAULT IN A SECOND SURGERY ON (B)(6) 2021. THIS RESOLVED THE PROBLEM. CAUSE OF THE EVENT IS REPORTED AS UNKNOWN. REPORTEDLY, 'AFTER SURGERY PATIENT'S ARCH WAS TOO HIGH AND TOO LOW." AFT…
https://www.accessdata.fda.gov/scripts/cdrh/cfdocs/cfMAUDE/Detail.CFM?MDRFOI__ID=11855176&pc=MTA	2023826-2021-01506	2021-04-06 04:00:00	Injury	STAAR SURGICAL COMPANY	2021-05-20 04:00:00	MTA	IMPLANTABLE COLLAMER LENS (ICL)	Inadequacy of Device Shape and/or Size	Appropriate Clinical Signs, Symptoms, Conditions Term / Code Not Available	N/A	1	Event Description: THE REPORTER INDICATED THAT THE SURGEON IMPLANTED A 12.6MM VICMO12.6, -08.50 DIOPTER, IMPLANTABLE COLLAMER LENS INTO THE PATIENT'S LEFT EYE (OS) ON (B)(6) 2021. THE LENS WAS EXPLANTED DUE TO LOW VAULT IN A SECOND SURGERY ON (B)(6) 2021. THIS RESOLVED THE PROBLEM. CAUSE OF THE EVENT IS REPORTED AS UNKNOWN. REPORTEDLY, 'AFTER SURGERY PATIENT'S ARCH WAS TOO HIGH AND TOO LOW." AFTE…
https://www.accessdata.fda.gov/scripts/cdrh/cfdocs/cfMAUDE/Detail.CFM?MDRFOI__ID=12167107&pc=MTA	2023826-2021-02524	2021-05-14	Injury	STAAR SURGICAL COMPANY	2021-07-14	MTA	IMPLANTABLE COLLAMER LENS (ICL)	Inadequacy of Device Shape and/or Size	Appropriate Clinical Signs, Symptoms, Conditions Term / Code Not Available	P030016	1	Event Description: THE REPORTER INDICATED THAT THE SURGEON IMPLANTED A 13.2MM MICL 13.2, -12.0 DIOPTER, IMPLANTABLE COLLAMER LENS INTO THE PATIENT'S RIGHT EYE (OD) ON (B)(6) 2021. THE LENS WAS REPLACED WITH A SHORTER LENGTH LENS DUE TO SIGNIFICANT REDUCTION OF IRIDO-CORNEAL ANGLES AND EXCESSIVE VAULT ON (B)(6) 2021. THIS RESOLVED THE PROBLEM. CAUSE OF THE EVENT IS REPORTED AS DEVICE, TOO LARGE/LO…
https://www.accessdata.fda.gov/scripts/cdrh/cfdocs/cfMAUDE/Detail.CFM?MDRFOI__ID=13664247&pc=MTA	2023826-2022-00662	2021-06-01 04:00:00	Injury	STAAR SURGICAL COMPANY	2022-03-03 05:00:00	MTA	IMPLANTABLE COLLAMER LENS (ICL)	Inadequacy of Device Shape and/or Size	Appropriate Clinical Signs, Symptoms, Conditions Term / Code Not Available	N/A	1	Event Description: THE REPORTER INDICATED THE SURGEON IMPLANTED A 12.6MM VICM5_12.6 IMPLANTABLE COLLAMER LENS, DIOPTER -7.0 INTO THE PATIENT'S RIGHT EYE (OD) ON (B)(6) 2021. ON (B)(6) 2021 THE LENS WAS EXCHANGED WITH A LONGER LENS DUE TO LOW VAULT AND SIGNIFICANT REDUCTION OF IRIDO-CORNEAL ANGLES (ICA). THE PROBLEM WAS RESOLVED. THE CAUSE OF THE EVENT IS REPORTED AS UNKNOWN. Manufacturer Narrativ…
https://www.accessdata.fda.gov/scripts/cdrh/cfdocs/cfMAUDE/Detail.CFM?MDRFOI__ID=12443620&pc=MTA	2023826-2021-03493	2021-07-21	Injury	STAAR SURGICAL COMPANY	2021-09-08	MTA	IMPLANTABLE COLLAMER LENS (ICL)	Inadequacy of Device Shape and/or Size	Appropriate Clinical Signs, Symptoms, Conditions Term / Code Not Available	P030016	1	Event Description: THE REPORTER INDICATED THE SURGEON SAW A FEMALE PATIENT WITH PLUS POWERED ICL IMPLANTABLE COLLAMER LENS, IMPLANTED IN RIGHT EYE (OD) IN 2004 - 2005. THE LENS WAS REPORTED AS HAVING A LARGE VAULT, WITH SHALLOW ANTERIOR CHAMBER. THE PIS WERE PATENT AND IOP WAS NORMAL. THE ENDOTHELIAL CELL COUNT WAS LOW (1200). THE LENS REMAINED IMPLANTED. ADDITIONAL INFORMATION HAS BEEN REQUESTED…
https://www.accessdata.fda.gov/scripts/cdrh/cfdocs/cfMAUDE/Detail.CFM?MDRFOI__ID=12449010&pc=MTA	2023826-2021-03494	2021-07-21	Injury	STAAR SURGICAL COMPANY	2021-09-09	MTA	IMPLANTABLE COLLAMER LENS (ICL)	Inadequacy of Device Shape and/or Size	Appropriate Clinical Signs, Symptoms, Conditions Term / Code Not Available	P030016	1	Event Description: THE REPORTER INDICATED THE SURGEON SAW A FEMALE PATIENT WITH PLUS POWERED ICL IMPLANTABLE COLLAMER LENS, IMPLANTED IN LEFT EYE (OS) IN 2004 - 2005. THE LENS WAS REPORTED AS HAVING A LOW VAULT. THE ENDOTHELIAL CELL COUNT WAS LOW (1500). THE LENS REMAINED IMPLANTED. ADDITIONAL INFORMATION HAS BEEN REQUESTED BUT NONE HAS BEEN FORTHCOMING. Manufacturer Narrative: AGE, WEIGHT, ETHNI…
https://www.accessdata.fda.gov/scripts/cdrh/cfdocs/cfMAUDE/Detail.CFM?MDRFOI__ID=15504589&pc=MTA	2023826-2022-03343	2021-09-09 04:00:00	Injury	STAAR SURGICAL COMPANY	2022-09-29 04:00:00	MTA	IMPLANTABLE COLLAMER LENS (ICL)	Inadequacy of Device Shape and/or Size	Appropriate Clinical Signs, Symptoms, Conditions Term / Code Not Available	P030016	1	Event Description: THE REPORTER INDICATED THAT A 12.6MM VICM5_12.6 IMPLANTABLE COLLAMER LENS -12.0 DIOPTER WAS IMPLANTED INTO THE PATIENT'S RIGHT EYE (OD) ON (B)(6) 2021. EXCESSIVE VAULT AND ANGLE CLOSURE WITH ELEVATED INTRAOCULAR PRESSURE WAS OBSERVED POST ICL IMPLANTATION. THE LENS WAS EXPLANTED ON THE SAME DATE AS IMPLANTATION BUT IN A DIFFERENT SURGERY. ON (B)(6) 2021 A REPLACEMENT LENS OF SH…
https://www.accessdata.fda.gov/scripts/cdrh/cfdocs/cfMAUDE/Detail.CFM?MDRFOI__ID=12599725&pc=MTA	2023826-2021-03916	2021-09-10 04:00:00	Injury	STAAR SURGICAL COMPANY	2021-10-08 04:00:00	MTA	IMPLANTABLE COLLAMER LENS (ICL)	Inadequacy of Device Shape and/or Size	Appropriate Clinical Signs, Symptoms, Conditions Term / Code Not Available	N/A	1	Event Description: THE REPORTER INDICATED THE SURGEON IMPLANTED A 13.2MM VICMO13.2 IMPLANTABLE COLLAMER LENS, DIOPTER -9.5 INTO THE PATIENT'S LEFT EYE (OS) ON (B)(6) 2020. THE SURGEON REPORTS LOW VAULT AND PIGMENT DISPERSION. REPORTEDLY, "THE REFRACTIVE RESULT HAS BEEN ACHIEVED. DURING THE NEXT CONTROL OBSERVATION IT WAS NOTED THAT THE LENS HAS DROPPED AND THE VAULT IS A CRITICAL MARK OF 120UM. I…
https://www.accessdata.fda.gov/scripts/cdrh/cfdocs/cfMAUDE/Detail.CFM?MDRFOI__ID=12599739&pc=MTA	2023826-2021-03915	2021-09-10 04:00:00	Injury	STAAR SURGICAL COMPANY	2021-10-08 04:00:00	MTA	IMPLANTABLE COLLAMER LENS (ICL)	Inadequacy of Device Shape and/or Size	Appropriate Clinical Signs, Symptoms, Conditions Term / Code Not Available	N/A	1	Event Description: THE REPORTER INDICATED THE SURGEON IMPLANTED A 13.2MM VICMO13.2 IMPLANTABLE COLLAMER LENS, DIOPTER -9.0 INTO THE PATIENT'S RIGHT EYE (OD) ON (B)(6) 2020. THE SURGEON REPORTS LOW VAULT AND PIGMENT DISPERSION. REPORTEDLY, "THE REFRACTIVE RESULT HAS BEEN ACHIEVED. DURING THE NEXT CONTROL OBSERVATION IT WAS NOTED THAT THE LENS HAS DROPPED AND THE VAULT IS A CRITICAL MARK OF 105UM. …
https://www.accessdata.fda.gov/scripts/cdrh/cfdocs/cfMAUDE/Detail.CFM?MDRFOI__ID=12716124&pc=MTA	2023826-2021-04134	2021-09-14	Injury	STAAR SURGICAL COMPANY	2021-10-28	MTA	IMPLANTABLE COLLAMER LENS (ICL)	Inadequacy of Device Shape and/or Size	Appropriate Clinical Signs, Symptoms, Conditions Term / Code Not Available	NA	1	Event Description: THE REPORTER INDICATED THE SURGEON IMPLANTED A 13.2MM VICM5_13.2 IMPLANTABLE COLLAMER LENS, -06.50 DIOPTER, INTO THE PATIENTS LEFT EYE (OS) ON (B)(6) 2021. THE LENS WAS EXPLANTED ON (B)(6) 2021 DUE TO EXCESSIVE VAULTING AND SIGNIFICANT REDUCTION OF IRIDO-CORNEAL ANGLES. THE LENS WAS REPLACED WITH A SHORTER LENS AND THE PROBLEM WAS RESOLVED. Manufacturer Narrative: WEIGHT: UNK. …
https://www.accessdata.fda.gov/scripts/cdrh/cfdocs/cfMAUDE/Detail.CFM?MDRFOI__ID=12619778&pc=MTA	2023826-2021-03984	2021-09-24	Injury	STAAR SURGICAL COMPANY	2021-10-12	MTA	IMPLANTABLE COLLAMER LENS (ICL)	Inadequacy of Device Shape and/or Size	Appropriate Clinical Signs, Symptoms, Conditions Term / Code Not Available	P030016	1	Event Description: THE REPORTER INDICATED THE SURGEON IMPLANTED A 13.2MM MICL13.2 IMPLANTABLE COLLAMER LENS, -08.50 DIOPTER, IN THE PATIENTS RIGHT EYE (OD) ON (B)(6) 2021. THE LENS WAS EXPLANTED ON (B)(6) 2021 DUE TO EXCESSIVE VAULTING AND ANGLE CLOSURE. THE LENS WAS REPLACED WITH A SHORTER LENS AND THE PROBLEM WAS RESOLVED. Manufacturer Narrative: WEIGHT - UNK. ETHNICITY - UNK. RACE - UNK. (B)(4…
https://www.accessdata.fda.gov/scripts/cdrh/cfdocs/cfMAUDE/Detail.CFM?MDRFOI__ID=13442385&pc=MTA	2023826-2022-00315	2021-10-23 04:00:00	Injury	STAAR SURGICAL COMPANY	2022-02-03 05:00:00	MTA	IMPLANTABLE COLLAMER LENS (ICL)	Inadequacy of Device Shape and/or Size	Appropriate Clinical Signs, Symptoms, Conditions Term / Code Not Available	NA	1	Event Description: THE REPORTER INDICATED THAT A 12.6MM VICMO 12.6IMPLANTABLE COLLAMER LENS OF -6.5 DIOPTER WAS IMPLANTED INTO THE PATIENTS RIGHT EYE (OD) ON (B)(6) 2021. ON (B)(6) 2021 THE LENS WAS EXCHANGED FOR A SHORTER LENGTH LENS DUE TO EXCESSIVE VAULT AND SIGNIFICANT REDUCTION OF CORNEAL ANGLES. THE EXCHANGE RESOLVED THE PROBLEM. "DURING THE OPERATION, THE DOCTOR USED THE OPERATING MICROSCO…
https://www.accessdata.fda.gov/scripts/cdrh/cfdocs/cfMAUDE/Detail.CFM?MDRFOI__ID=13006620&pc=MTA	2023826-2021-04885	2021-11-02 04:00:00	Malfunction	STAAR SURGICAL COMPANY	2021-12-14 05:00:00	MTA	IMPLANTABLE COLLAMER LENS (ICL)	Inadequacy of Device Shape and/or Size	Appropriate Clinical Signs, Symptoms, Conditions Term / Code Not Available		1	Event Description: THE REPORTER INDICATED THAT THE SURGEON IMPLANTED A 13.7MM VICM5_13.7; -2.50 DIOPTER IMPLANTABLE COLLAMER LENS INTO THE PATIENT'S RIGHT EYE (OD) ON (B)(6) 2021. INTRAOPERATIVELY IT WAS REMOVED DUE TO EXCESSIVE VAULTING. ON THE SAME DATE A REPLACEMENT LENS OF SHORTER LENGTHS WAS IMPLANTED. POSTOP RESULTS NOTED "MINOR VOLCANO EFFECT BUT CHAMBER IS DEEP". CAUSE OF THE EVENT WAS RE…
https://www.accessdata.fda.gov/scripts/cdrh/cfdocs/cfMAUDE/Detail.CFM?MDRFOI__ID=14030248&pc=MTA	2023826-2022-01090	2021-11-10 05:00:00	Injury	STAAR SURGICAL COMPANY	2022-04-06 04:00:00	MTA	IMPLANTABLE COLLAMER LENS (ICL)	Inadequacy of Device Shape and/or Size	Appropriate Clinical Signs, Symptoms, Conditions Term / Code Not Available	NA	1	Event Description: THE REPORTER INDICATED THE SURGEON IMPLANTED A 13.7MM VICMO13.7 IMPLANTABLE COLLAMER LENS, -10.50 DIOPTER, IN THE PATIENTS LEFT EYE (OS). THE LENS WAS EXPLANTED DUE TO EXCESSIVE VAULTING AND SIGNIFICANT REDUCTION OF IRIDO-CORNEAL ANGLES (THE PATIENT DID NOT HAVE THE EXPECTED RESULT). THE LENS WAS REPLACED WITH A SMALLER SIZE LENS (12.1) WITH THE SAME DIOPTER. THE CAUSE OF THE E…
https://www.accessdata.fda.gov/scripts/cdrh/cfdocs/cfMAUDE/Detail.CFM?MDRFOI__ID=13082670&pc=MTA	2023826-2021-04922	2021-12-15 05:00:00	Injury	STAAR SURGICAL COMPANY	2021-12-23 05:00:00	MTA	IMPLANTABLE COLLAMER LENS (ICL)	Inadequacy of Device Shape and/or Size	Appropriate Clinical Signs, Symptoms, Conditions Term / Code Not Available	NA	1	Event Description: THE REPORTER INDICATED THE SURGEON IMPLANTED A 13.2MM IMPLANTABLE COLLAMER LENS INTO THE PATIENTS EYE. THE LENS WAS REPORTED AS EXCESSIVE VAULTING, WITH NARROW ANGLES AND REMAINED IMPLANTED. ADDITIONAL INFORMATION HAS BEEN REQUESTED BUT NONE HAS BEEN FORTHCOMING. Manufacturer Narrative: THIS PRODUCT IS MANUFACTURED IN THE U.S. BUT NOT MARKETED IN THE U.S. CLAIM # (B)(4). Manufa…
https://www.accessdata.fda.gov/scripts/cdrh/cfdocs/cfMAUDE/Detail.CFM?MDRFOI__ID=14639226&pc=MTA	2023826-2022-01791	2021-12-28 05:00:00	Injury	STAAR SURGICAL COMPANY	2022-06-08 04:00:00	MTA	IMPLANTABLE COLLAMER LENS (ICL)	Inadequacy of Device Shape and/or Size	Appropriate Clinical Signs, Symptoms, Conditions Term / Code Not Available	P030016	1	Event Description: THE REPORTER INDICATED THE SURGEON IMPLANTED A 13.2MM VICM5_13.2 IMPLANTABLE COLLAMER LENS, -10.50 DIOPTER, INTO THE PATIENTS RIGHT EYE (OD) ON (B)(6) 2021. THE LENS WAS EXPLANTED ON (B)(6) 2022 DUE TO LOW VAULTING AND PERMANENT LOSS OF BCVA. THE LENS WAS REPLACED WIH A LONGER LENS AND THE PROBLEM WAS RESOLVED. Manufacturer Narrative: (B)(4). CLAIM # (B)(4).
https://www.accessdata.fda.gov/scripts/cdrh/cfdocs/cfMAUDE/Detail.CFM?MDRFOI__ID=14647871&pc=MTA	2023826-2022-01792	2021-12-29 05:00:00	Injury	STAAR SURGICAL COMPANY	2022-06-09 04:00:00	MTA	IMPLANTABLE COLLAMER LENS (ICL)	Inadequacy of Device Shape and/or Size	Appropriate Clinical Signs, Symptoms, Conditions Term / Code Not Available	P030016	1	Event Description: THE REPORTER INDICATED THE SURGEON IMPLANTED A 13.2MM VICM5_13.2 IMPLANTABLE COLLAMER LENS, -10.50 DIOPTER, INTO THE PATIENTS LEFT EYE (OS) ON (B)(6) 2021. THE LENS WAS EXPLANTED ON (B)(6) 2022 DUE TO LOW VAULTING AND PERMANENT LOSS OF BCVA. THE LENS WAS REPLACED WITH A LONGER LENS AND THE PROBLEM WAS RESOLVED. Manufacturer Narrative: (B)(4). CLAIM # (B)(4).
https://www.accessdata.fda.gov/scripts/cdrh/cfdocs/cfMAUDE/Detail.CFM?MDRFOI__ID=13553238&pc=MTA	2023826-2022-00539	2022-02-02 05:00:00	Injury	STAAR SURGICAL COMPANY	2022-02-17 05:00:00	MTA	IMPLANTABLE COLLAMER LENS (ICL)	Inadequacy of Device Shape and/or Size	Appropriate Clinical Signs, Symptoms, Conditions Term / Code Not Available		1	Event Description: THE REPORTER INDICATED THAT THE SURGEON IMPLANTED A 13.7MM VICM5_13.7; -2.75 DIOPTER IMPLANTABLE COLLAMER LENS INTO THE PATIENT'S RIGHT EYE (OD) ON (B)(6) 2022. THE PATIENT EXPERIENCED EXCESSIVE VAULTING AND SIGNIFICANT REDUCTION OF IRIDO-CORNEAL ANGLES. ON (B)(6) 2022 THE LENS WAS EXCHANGED WITH A SHORTER LENGTH LENS AND THIS RESOLVED THE PROBLEM. THE CAUSE OF THE EVENT WAS RE…
https://www.accessdata.fda.gov/scripts/cdrh/cfdocs/cfMAUDE/Detail.CFM?MDRFOI__ID=13553240&pc=MTA	2023826-2022-00540	2022-02-02 05:00:00	Injury	STAAR SURGICAL COMPANY	2022-02-17 05:00:00	MTA	IMPLANTABLE COLLAMER LENS (ICL)	Inadequacy of Device Shape and/or Size	Appropriate Clinical Signs, Symptoms, Conditions Term / Code Not Available		1	Event Description: THE REPORTER INDICATED THAT THE SURGEON IMPLANTED A 13.7MM VICM5_13.7; -2.25 DIOPTER IMPLANTABLE COLLAMER LENS INTO THE PATIENT'S LEFT EYE (OS) ON (B)(6) 2022. THE PATIENT EXPERIENCED EXCESSIVE VAULTING AND SIGNIFICANT REDUCTION OF IRIDO-CORNEAL ANGLES. ON (B)(6) 2022 THE LENS WAS EXCHANGED WITH A SHORTER LENGTH LENS AND THIS RESOLVED THE PROBLEM. THE CAUSE OF THE EVENT WAS REP…
https://www.accessdata.fda.gov/scripts/cdrh/cfdocs/cfMAUDE/Detail.CFM?MDRFOI__ID=13726657&pc=MTA	2023826-2022-00757	2022-02-14 05:00:00	Injury	STAAR SURGICAL COMPANY	2022-03-10 05:00:00	MTA	IMPLANTABLE COLLAMER LENS (ICL)	Inadequacy of Device Shape and/or Size	Appropriate Clinical Signs, Symptoms, Conditions Term / Code Not Available	NA	1	Event Description: THE REPORTER INDICATED THE SURGEON IMPLANTED A 13.2MM VICM5_13.2 IMPLANTABLE COLLAMER LENS, -04.50 DIOPTER INTO THE PATIENTS LEFT EYE (OS) ON (B)(6) 2021. THE LENS WAS EXPLANTED ON (B)(6) 2022 DUE TO EXCESSIVE VAULTING AND VARIATION IN ELEVATED INTRAOCULAR PRESSURE (IOP) (NO ELEVATED IOP PEAKS MEASURABLE). THE LENS WAS REPLACED WITH A SHORTER LENS. THE CAUSE OF THE EVENT WAS UN…
https://www.accessdata.fda.gov/scripts/cdrh/cfdocs/cfMAUDE/Detail.CFM?MDRFOI__ID=13796099&pc=MTA	2023826-2022-00785	2022-02-15 05:00:00	Injury	STAAR SURGICAL COMPANY	2022-03-17 04:00:00	MTA	IMPLANTABLE COLLAMER LENS (ICL)	Inadequacy of Device Shape and/or Size	Appropriate Clinical Signs, Symptoms, Conditions Term / Code Not Available		1	Event Description: THE REPORTER INDICATED THAT A 13.2MM VICM5 13.2 IMPLANTABLE COLLAMER LENS OF -5.50 DIOPTER WAS IMPLANTED INTO THE PATIENT'S LEFT EYE (OS) ON (B)(6)2020. EXCESSIVE VAULT AND SIGNIFICANT REDUCTION OF ENDOTHELIAL CELL COUNT OR SIGNIFICANT ENDOTHELIAL CELL LOSS WAS OBSERVED. ON (B)(6)2022 THE LENS WAS REPOSITIONED TO VERTICAL ORIENTATION AND THE PROBLEM WAS RESOLVED FOR VAULT. "(EC…
https://www.accessdata.fda.gov/scripts/cdrh/cfdocs/cfMAUDE/Detail.CFM?MDRFOI__ID=14287983&pc=MTA	2023826-2022-01305	2022-04-07 04:00:00	Malfunction	STAAR SURGICAL COMPANY	2022-05-05 04:00:00	MTA	IMPLANTABLE COLLAMER LENS (ICL)	Inadequacy of Device Shape and/or Size	Appropriate Clinical Signs, Symptoms, Conditions Term / Code Not Available	NA	1	Event Description: THE REPORTER INDICATED THE SURGEON IMPLANTED A 13.2MM VICM13.2 IMPLANTABLE COLLAMER LENS, -08.00 DIOPTER INTO THE PATIENTS RIGHT EYE (OD). THE LENS WAS REPORTED AS LOW VAULTING AND REFRACTIVE CHANGE OVERTIME. THE LENS REMAINED IMPLANTED. THE CAUSE OF THE EVENT WAS UNKNOWN. ADDITIONAL INFORMATION HAS BEEN REQUESTED BUT NONE HAS BEEN FORTHCOMING. Manufacturer Narrative: ADDITIONA…
https://www.accessdata.fda.gov/scripts/cdrh/cfdocs/cfMAUDE/Detail.CFM?MDRFOI__ID=14292696&pc=MTA	2023826-2022-01306	2022-04-07 04:00:00	Malfunction	STAAR SURGICAL COMPANY	2022-05-05 04:00:00	MTA	IMPLANTABLE COLLAMER LENS (ICL)	Inadequacy of Device Shape and/or Size	Appropriate Clinical Signs, Symptoms, Conditions Term / Code Not Available	NA	1	Event Description: THE REPORTER INDICATED THE SURGEON IMPLANTED A 12.5MM ICM125V4 IMPLANTABLE COLLAMER LENS, -12.50 DIOPTER INTO THE PATIENTS LEFT EYE (OS). THE LENS WAS REPORTED AS LOW VAULTING AND REFRACTIVE CHANGE OVERTIME. THE LENS REMAINED IMPLANTED. THE CAUSE OF THE EVENT WAS UNKNOWN. ADDITIONAL INFORMATION HAS BEEN REQUESTED BUT NONE HAS BEEN FORTHCOMING. Manufacturer Narrative: ADDITIONAL…
https://www.accessdata.fda.gov/scripts/cdrh/cfdocs/cfMAUDE/Detail.CFM?MDRFOI__ID=14598572&pc=MTA	2023826-2022-01740	2022-05-04 04:00:00	Injury	STAAR SURGICAL COMPANY	2022-06-03 04:00:00	MTA	IMPLANTABLE COLLAMER LENS (ICL)	Inadequacy of Device Shape and/or Size	Appropriate Clinical Signs, Symptoms, Conditions Term / Code Not Available	NA	1	Event Description: THE REPORTER INDICATED THAT A 13.2MM VICH13.2 IMPLANTABLE COLLAMER LENS OF +7.50 DIOPTER WAS IMPLANTED INTO THE PATIENT'S LEFT EYE (OS) ON (B)(6) 2022. EXESSIVE VAULT AND SIGNIFICANT REDUCTION OF ICA WERE REPORTED. THE LENS REMAINS IMPLANTED. CAUSE OF EVENT IS UNKNOWN. Manufacturer Narrative: B5 - THE REPORTER INDICATED THAT A 13.2MM VICH13.2 IMPLANTABLE COLLAMER LENS OF +7.50 …
https://www.accessdata.fda.gov/scripts/cdrh/cfdocs/cfMAUDE/Detail.CFM?MDRFOI__ID=14985565&pc=MTA	2023826-2022-02143	2022-05-27 04:00:00	Injury	STAAR SURGICAL COMPANY	2022-07-12 04:00:00	MTA	IMPLANTABLE COLLAMER LENS (ICL)	Inadequacy of Device Shape and/or Size	Appropriate Clinical Signs, Symptoms, Conditions Term / Code Not Available	P030016	1	Event Description: THE REPORTER INDICATED THAT THE SURGEON IMPLANTED A 12.6MM VICM5 12.6, -9.00 DIOPTER, IMPLANTABLE COLLAMER LENS INTO THE PATIENT'S RIGHT EYE (OD) ON (B)(6) 2022. THE LENS WAS REPLACED WITH A SHORTER LENGTH LENS DUE TO SIGNIFICANT REDUCTION OF IRIDO-CORNEAL ANGLES AND EXCESSIVE VAULT ON (B)(6) 2022. THIS RESOLVED THE PROBLEM. CAUSE OF THE EVENT IS REPORTED AS UNKNOWN. Manufactur…
https://www.accessdata.fda.gov/scripts/cdrh/cfdocs/cfMAUDE/Detail.CFM?MDRFOI__ID=15010000&pc=MTA	2023826-2022-02231	2022-06-08 04:00:00	Injury	STAAR SURGICAL COMPANY	2022-07-14 04:00:00	MTA	IMPLANTABLE COLLAMER LENS (ICL)	Inadequacy of Device Shape and/or Size	Appropriate Clinical Signs, Symptoms, Conditions Term / Code Not Available	P030016	1	Event Description: THE REPORTER INDICATED THAT A 13.7MM VICMO13.7 IMPLANTABLE COLLAMER LENS OF -4.00 DIOPTER WAS IMPLANTED INTO THE PATIENT'S RIGHT EYE (OD) ON (B)(6) 2022. ON (B)(6) 2022 THE LENS WAS EXCHANGED WITH A SHORTER LENGTH LENS DUE TO EXCESSIVE VAULT AND SIGNIFICANT REDUCTION OF IRIDOCORNEAL ANGLES. THE EXCHANGE RESOLVED THE PROBLEM. "OVERSIZE LENS" WAS REPORTED FOR CAUSE DETAILS. Manuf…
https://www.accessdata.fda.gov/scripts/cdrh/cfdocs/cfMAUDE/Detail.CFM?MDRFOI__ID=15010097&pc=MTA	2023826-2022-02232	2022-06-08 04:00:00	Injury	STAAR SURGICAL COMPANY	2022-07-14 04:00:00	MTA	IMPLANTABLE COLLAMER LENS (ICL)	Inadequacy of Device Shape and/or Size	Appropriate Clinical Signs, Symptoms, Conditions Term / Code Not Available	P030016	1	Event Description: THE REPORTER INDICATED THAT A 13.7MM VICMO13.7 IMPLANTABLE COLLAMER LENS OF -4.50 DIOPTER WAS IMPLANTED INTO THE PATIENT'S LEFT EYE (OS) ON (B)(6) 2022. ON (B)(6) 2022 THE LENS WAS EXCHANGED WITH A SHORTER LENGTH LENS DUE TO EXCESSIVE VAULT AND SIGNIFICANT REDUCTION OF IRIDOCORNEAL ANGLES. THE EXCHANGE RESOLVED THE PROBLEM. " OVERSIZE LENS" WAS REPORTED FOR CAUSE DETAILS. Manuf…
https://www.accessdata.fda.gov/scripts/cdrh/cfdocs/cfMAUDE/Detail.CFM?MDRFOI__ID=15135244&pc=MTA	2023826-2022-02454	2022-06-08 04:00:00	Malfunction	STAAR SURGICAL COMPANY	2022-07-29 04:00:00	MTA	IMPLANTABLE COLLAMER LENS (ICL)	Inadequacy of Device Shape and/or Size	Appropriate Clinical Signs, Symptoms, Conditions Term / Code Not Available	NA	1	Event Description: THE REPORTER INDICATED THAT A 13.2MM VICM5_13.2 IMPLANTABLE COLLAMER LENS OF -7.00 DIOPTER WAS IMPLANTED INTO THE PATIENT'S LEFT EYE (OS) ON (B)(6) 2022. EXCESSIVE VAULT AND NARROW ANGLES WAS OBSERVED, LENS REMAINS IMPLANTED. IT WAS REPORTED THAT THE DEVICE DID NOT FAIL TO PERFORM AS INTENDED. IF ADDITIONAL INFORMATION IS RECEIVED A SUPPLEMENTAL MEDWATCH REPORT WILL BE SUBMITTE…
https://www.accessdata.fda.gov/scripts/cdrh/cfdocs/cfMAUDE/Detail.CFM?MDRFOI__ID=15583834&pc=MTA	2023826-2022-03523	2022-08-18 04:00:00	Injury	STAAR SURGICAL COMPANY	2022-10-11 04:00:00	MTA	IMPLANTABLE COLLAMER LENS (ICL)	Inadequacy of Device Shape and/or Size	Appropriate Clinical Signs, Symptoms, Conditions Term / Code Not Available	P030016	1	Event Description: THE REPORTER INDICATED THAT A 13.2MM VICMO 13.2 IMPLANTABLE COLLAMER LENS OF -12.0 DIOPTER WAS IMPLANTED INTO THE PATIENT'S LEFT EYE (OS) ON (B)(6) 2022. ON (B)(6) 2022 THE LENS WAS EXPLANTED AND A SHORTER LENS WAS IMPLANTED DUE TO SHALLOW AC AND EXCESSIVE VAULT. THE REPLACEMENT LENS RESOLVED THE PROBLEM. CAUSE REPORTED AS DEVICE AND PATIENT RELATED FACTOR. Manufacturer Narrati…
https://www.accessdata.fda.gov/scripts/cdrh/cfdocs/cfMAUDE/Detail.CFM?MDRFOI__ID=15584122&pc=MTA	2023826-2022-03522	2022-08-18 04:00:00	Injury	STAAR SURGICAL COMPANY	2022-10-11 04:00:00	MTA	IMPLANTABLE COLLAMER LENS (ICL)	Inadequacy of Device Shape and/or Size	Appropriate Clinical Signs, Symptoms, Conditions Term / Code Not Available	P030016	1	Event Description: THE REPORTER INDICATED THAT A 13.2MM VICMO 13.2 IMPLANTABLE COLLAMER LENS OF -17.0 DIOPTER WAS IMPLANTED INTO THE PATIENT'S RIGHT EYE (OD) ON (B)(6) 2022. ON (B)(6) 2022 THE LENS WAS EXPLANTED AND A SHORTER LENS WAS IMPLANTED DUE TO SHALLOW AC AND EXCESSIVE VAULT. THE REPLACEMENT LENS RESOLVED THE PROBLEM. CAUSE REPORTED AS DEVICE AND PATIENT RELATED FACTOR. Manufacturer Narrat…
https://www.accessdata.fda.gov/scripts/cdrh/cfdocs/cfMAUDE/Detail.CFM?MDRFOI__ID=16620686&pc=MTA	2023826-2023-01029	2022-10-05 04:00:00	Injury	STAAR SURGICAL COMPANY	2023-03-27 04:00:00	MTA	IMPLANTABLE COLLAMER LENS (ICL)	Inadequacy of Device Shape and/or Size	Appropriate Clinical Signs, Symptoms, Conditions Term / Code Not Available	P030016	1	Event Description: THE REPORTER INDICATED THAT THE SURGEON IMPLANTED A 12.1MM VICM5 12.1, -09.00 DIOPTER, IMPLANTABLE COLLAMER LENS INTO THE PATIENT'S RIGHT EYE (OD) ON (B)(6) 2022. THE LENS WAS EXPLANTED ON (B)(6) 2022 DUE TO LOW VAULT. A LONGER LENGTH LENS WAS IMPLANTED ON 05/OCT/2022. THIS RESOLVED THE PROBLEM. CAUSE OF THE EVENT IS REPORTED AS UNKNOWN. Manufacturer Narrative: (B)(4).
https://www.accessdata.fda.gov/scripts/cdrh/cfdocs/cfMAUDE/Detail.CFM?MDRFOI__ID=16877955&pc=MTA	2023826-2023-01617	2022-10-12 04:00:00	Malfunction	STAAR SURGICAL COMPANY	2023-05-05 04:00:00	MTA	IMPLANTABLE COLLAMER LENS (ICL)	Inadequacy of Device Shape and/or Size	Appropriate Clinical Signs, Symptoms, Conditions Term / Code Not Available	P030016	1	Event Description: THE REPORTER INDICATED THAT A 13.7MM VICM5_13.7 IMPLANTABLE COLLAMER LENS OF -13.00 DIOPTER WAS IMPLANTED INTO THE PATIENT'S LEFT EYE (OS) ON (B)(6) 2022. EXCESSIVE VAULT AND SIGNIFICANT REDUCTION OF IRIDOCORNEAL ANGLES WAS OBSERVED. THE LENS REMAINS IMPLANTED. IF ADDITIONAL INFORMATION IS RECEIVED A SUPPLEMENTAL MEDWATCH REPORT WILL BE SUBMITTED. Manufacturer Narrative: H6- HE…
https://www.accessdata.fda.gov/scripts/cdrh/cfdocs/cfMAUDE/Detail.CFM?MDRFOI__ID=16877979&pc=MTA	2023826-2023-01616	2022-10-12 04:00:00	Malfunction	STAAR SURGICAL COMPANY	2023-05-05 04:00:00	MTA	IMPLANTABLE COLLAMER LENS (ICL)	Inadequacy of Device Shape and/or Size	Appropriate Clinical Signs, Symptoms, Conditions Term / Code Not Available	P030016	1	Event Description: THE REPORTER INDICATED THAT A 13.7MM VICM5_13.7 IMPLANTABLE COLLAMER LENS OF -13.00 DIOPTER WAS IMPLANTED INTO THE PATIENT'S RIGHT EYE (OD) ON (B)(6) 2022. EXCESSIVE VAULT AND SIGNIFICANT REDUCTION OF IRIDOCORNEAL ANGLES WAS OBSERVED. THE LENS REMAINS IMPLANTED. IF ADDITIONAL INFORMATION IS RECEIVED A SUPPLEMENTAL MEDWATCH REPORT WILL BE SUBMITTED. Manufacturer Narrative: H6- H…
https://www.accessdata.fda.gov/scripts/cdrh/cfdocs/cfMAUDE/Detail.CFM?MDRFOI__ID=15830802&pc=MTA	2023826-2022-04016	2022-10-14 04:00:00	Injury	STAAR SURGICAL COMPANY	2022-11-19 05:00:00	MTA	IMPLANTABLE COLLAMER LENS (ICL)	Inadequacy of Device Shape and/or Size	Appropriate Clinical Signs, Symptoms, Conditions Term / Code Not Available	P030016	1	Event Description: THE REPORTER INDICATED THAT THE SURGEON IMPLANTED A 13.7MM VICM5 13.7 IMPLANTABLE COLLAMER LENS OF -5.0 DIOPTER WAS IMPLANTED INTO THE PATIENTS RIGHT EYE (OD) ON (B)(6) 2022. EXCESSIVE VAULT WAS OBSERVED WITH SIGNIFICANT REDUCTION OF IRIDOCORNEAL ANGLES. ON (B)(6) 2022 THE LENS WAS EXPLANTED AND ON THE SAME DAY DIFFERENT SURGERY A REPLACEMENT OF SHORTER LENGTH WAS IMPLANTED AND…
https://www.accessdata.fda.gov/scripts/cdrh/cfdocs/cfMAUDE/Detail.CFM?MDRFOI__ID=15759256&pc=MTA	2023826-2022-03827	2022-10-20 04:00:00	Malfunction	STAAR SURGICAL COMPANY	2022-11-09 05:00:00	MTA	IMPLANTABLE COLLAMER LENS (ICL)	Inadequacy of Device Shape and/or Size	Appropriate Clinical Signs, Symptoms, Conditions Term / Code Not Available	P030016	1	Event Description: THE REPORTER INDICATED THAT A 13.2MM VICM513.2, -10.00 DIOPTER, IMPLANTABLE COLLAMER LENS WAS IMPLANTED, REMOVED, AND REPLACED INTRAOPERATIVELY WITH A SHORTER LENGTH LENS ON (B)(6) 2022 FROM PATIENT'S RIGHT EYE (OD) DUE TO EXCESSIVE VAULT.THIS RESOLVED THE PROBLEM. Manufacturer Narrative: RACE- UNK. ETHNICITY - UNK. WEIGHT - UNK. CLAIM# (B)(4).
https://www.accessdata.fda.gov/scripts/cdrh/cfdocs/cfMAUDE/Detail.CFM?MDRFOI__ID=16035511&pc=MTA	2023826-2022-04577	2022-11-02 04:00:00	Injury	STAAR SURGICAL COMPANY	2022-12-22 05:00:00	MTA	IMPLANTABLE COLLAMER LENS (ICL)	Inadequacy of Device Shape and/or Size	Appropriate Clinical Signs, Symptoms, Conditions Term / Code Not Available	P030016	1	Event Description: THE REPORTER INDICATED THAT THE SURGEON IMPLANTED A 12.1MM VICM5_12.1, -5.50 DIOPTER, IMPLANTABLE COLLAMER LENS INTO THE PATIENT'S LEFT EYE (OS) ON (B)(6) 2022. THE LENS WAS EXPLANTED ON (B)(6) 2022 DUE TO LOW VAULT. IN A SECOND SURGERY ON (B)(6) 2022 A LONGER LENGTH LENS WAS IMPLANTED. THIS RESOLVED THE PROBLEM. CAUSE OF THE EVENT IS REPORTED AS UNKNOWN. Manufacturer Narrative…
https://www.accessdata.fda.gov/scripts/cdrh/cfdocs/cfMAUDE/Detail.CFM?MDRFOI__ID=16330310&pc=MTA	2023826-2023-00473	2022-11-05 04:00:00	Injury	STAAR SURGICAL COMPANY	2023-02-08 05:00:00	MTA	IMPLANTABLE COLLAMER LENS (ICL)	Inadequacy of Device Shape and/or Size	Appropriate Clinical Signs, Symptoms, Conditions Term / Code Not Available	P030016	1	Event Description: THE REPORTER INDICATED THAT THE SURGEON IMPLANTED A 12.6MM VICMO12.6; -6.5 DIOPTER IMPLANTABLE COLLAMER LENS INTO THE PATIENT'S RIGHT EYE (OD) ON (B)(6) 2022 AS A REPLACEMENT LENS TO A PREVIOUS ISSUE. THE SURGEON NOTED "PRO2H; VOMIT; THERE IS EXUDATIVE MEMBRANE IN THE POSTERIOR CHAMBER". ON THIS SAME DATE THE LENS WAS EXPLANTED IN A SECOND SURGERY AND IT WAS NOTED "PATIENT FEEL…
https://www.accessdata.fda.gov/scripts/cdrh/cfdocs/cfMAUDE/Detail.CFM?MDRFOI__ID=15991899&pc=MTA	2023826-2022-04413	2022-11-11 05:00:00	Injury	STAAR SURGICAL COMPANY	2022-12-15 05:00:00	MTA	IMPLANTABLE COLLAMER LENS (ICL)	Inadequacy of Device Shape and/or Size	Appropriate Clinical Signs, Symptoms, Conditions Term / Code Not Available	P030016	1	Event Description: THE REPORTER INDICATED THAT A 13.2MM VICM5 13.2 IMPLANTABLE COLLAMER LENS OF -9.00 DIOPTER WAS IMPLANTED INTO THE LEFT EYE (OS) ON (B)(6) 2022. ON (B)(6) 2022 THE LENS EXPLANTED DUE TO EXCESSIVE VAULT. CAUSE REPORTED AS UNKNOWN. REPORTER STATED " PATIENT GOT COVID, SO THE SECONDARY IMPLANT IS POSTPONED." IF ADDITIONAL INFORMATION IS RECEIVED A SUPPLEMENTAL MEDWATCH REPORT WILL …
https://www.accessdata.fda.gov/scripts/cdrh/cfdocs/cfMAUDE/Detail.CFM?MDRFOI__ID=16210216&pc=MTA	2023826-2023-00206	2022-12-08 05:00:00	Injury	STAAR SURGICAL COMPANY	2023-01-19 05:00:00	MTA	IMPLANTABLE COLLAMER LENS (ICL)	Inadequacy of Device Shape and/or Size	Appropriate Clinical Signs, Symptoms, Conditions Term / Code Not Available	P030016	1	Event Description: THE REPORTER INDICATED THAT A 13.2MM VICM5_13.2 -10.00 DIOPTER IMPLANTABLE COLLAMER LENS WAS IMPLANTED INTO THE PATIENT'S LEFT EYE (OS) ON (B)(6) 2022. ON (B)(6) 2022 THE LENS WAS EXPLANTED DUE TO OBSERVATION OF EXCESSIVE VAULT AND SIGNIFICANT REDUCTION OF IRIDOCORNEAL ANGLES. THIS EXPLANT RESOLVED THE PROBLEM. THE REPORTER STATES THE CAUSE OF THIS EVENT IS DUE TO PATIENT RELAT…
https://www.accessdata.fda.gov/scripts/cdrh/cfdocs/cfMAUDE/Detail.CFM?MDRFOI__ID=16301127&pc=MTA	2023826-2023-00434	2022-12-13 05:00:00	Injury	STAAR SURGICAL COMPANY	2023-02-04 05:00:00	MTA	IMPLANTABLE COLLAMER LENS (ICL)	Inadequacy of Device Shape and/or Size	Appropriate Clinical Signs, Symptoms, Conditions Term / Code Not Available	P030016	1	Event Description: THE REPORTER INDICATED THAT A 12.6MM, VICMO12.6, -15.50 DIOPTER, IMPLANTABLE COLLAMER LENS WAS IMPLANTED INTO THE PATIENTS RIGHT EYE (OD) ON (B)(6) 2022. ON (B)(6) 2022 THE LENS WAS EXPLANTED DUE TO EXCESSIVE VAULT AND SIGNIFICANT REDUCTION OR IRIDOCORNEAL ANGLES. A REPLACEMENT LENS OF SHORTER LENGTH WAS LATER IMPLANTED AND THE PROBLEM RESOLVED. Manufacturer Narrative: HEALTH E…
https://www.accessdata.fda.gov/scripts/cdrh/cfdocs/cfMAUDE/Detail.CFM?MDRFOI__ID=17061378&pc=MTA	2023826-2023-02030	2023-01-17 05:00:00	Malfunction	STAAR SURGICAL COMPANY	2023-06-05 04:00:00	MTA	IMPLANTABLE COLLAMER LENS (ICL)	Inadequacy of Device Shape and/or Size	Appropriate Clinical Signs, Symptoms, Conditions Term / Code Not Available	P030016	1	Event Description: THE REPORTER INDICATED THAT A 13.2MM VICMO13.2, -10.0 DIOPTER, IMPLANTABLE COLLAMER LENS WAS IMPLANTED, REMOVED, AND REPLACED INTRAOPERATIVELY WITH A SHORTER LENGTH LENS ON (B)(6) 2023 FROM PATIENT'S RIGHT EYE (OD) DUE TO SIGNIFICANT REDUCTION OF IRIDO-CORNEL ANGLES AND EXCESSIVE VAULT.THIS RESOLVED THE PROBLEM. CAUSE OF THE EVENT IS REPORTED AS UNKNOWN. Manufacturer Narrative:…
https://www.accessdata.fda.gov/scripts/cdrh/cfdocs/cfMAUDE/Detail.CFM?MDRFOI__ID=16562713&pc=MTA	2023826-2023-00883	2023-01-25 05:00:00	Injury	STAAR SURGICAL COMPANY	2023-03-17 04:00:00	MTA	IMPLANTABLE COLLAMER LENS (ICL)	Inadequacy of Device Shape and/or Size	Appropriate Clinical Signs, Symptoms, Conditions Term / Code Not Available	P030016	1	Event Description: THE REPORTER INDICATED THAT A 13.2MM VICM5_13.2 IMPLANTABLE COLLAMER LENS OF -11.00 DIOPTER WAS IMPLANTED INTO THE PATIENT'S RIGHT EYE (OD) ON (B)(6) 2023. ON (B)(6) 2023 THE LENS WAS EXCHANGED FOR A SHORTER LENGTH LENS DUE TO EXCESSIVE VAULT AND SIGNIFICANT REDUCTION OF IRIDOCORNEAL ANGLES. THIS EXCHANGE RESOLVED THE PROBLEM. Manufacturer Narrative: CORRECTED DATA: B5- THE REP…
https://www.accessdata.fda.gov/scripts/cdrh/cfdocs/cfMAUDE/Detail.CFM?MDRFOI__ID=16713974&pc=MTA	2023826-2023-01216	2023-02-03 05:00:00	Injury	STAAR SURGICAL COMPANY	2023-04-11 04:00:00	MTA	IMPLANTABLE COLLAMER LENS (ICL)	Inadequacy of Device Shape and/or Size	Appropriate Clinical Signs, Symptoms, Conditions Term / Code Not Available	P030016	1	Event Description: THE REPORTER INDICATED THAT THE SURGEON IMPLANTED A 12.6MM VICMO12.6, -08.50 DIOPTER, IMPLANTABLE COLLAMER LENS INTO THE PATIENT'S LEFT EYE (OS) ON (B)(6) 2023. THE LENS WAS REPLACED WITH A SHORTER LENGTH LENS DUE TO EXCESSIVE VAULT ON (B)(6) 2023. THIS RESOLVED THE PROBLEM. CAUSE OF THE EVENT IS REPORTED AS UNKNOWN. Manufacturer Narrative: PATIENT WEIGHT, ETHNICITY & RACE UNKN…
https://www.accessdata.fda.gov/scripts/cdrh/cfdocs/cfMAUDE/Detail.CFM?MDRFOI__ID=16620714&pc=MTA	2023826-2023-01025	2023-02-06 05:00:00	Injury	STAAR SURGICAL COMPANY	2023-03-27 04:00:00	MTA	IMPLANTABLE COLLAMER LENS (ICL)	Inadequacy of Device Shape and/or Size	Appropriate Clinical Signs, Symptoms, Conditions Term / Code Not Available	P030016	1	Event Description: THE REPORTER INDICATED THAT THE SURGEON IMPLANTED A 12.6MM VICMO12.6, -04.00 DIOPTER, IMPLANTABLE COLLAMER LENS INTO THE PATIENT'S LEFT EYE (OS) ON (B)(6) 2022. THE LENS WAS REPLACED WITH A SHORTER LENGTH LENS DUE TO EXCESSIVE VAULT ON (B)(6) 2023. THIS RESOLVED THE PROBLEM. CAUSE OF THE EVENT IS REPORTED AS UNKNOWN. Manufacturer Narrative: PATIENT INFORMATION UNKNOWN. CLAIM# (…
https://www.accessdata.fda.gov/scripts/cdrh/cfdocs/cfMAUDE/Detail.CFM?MDRFOI__ID=17770485&pc=MTA	2023826-2023-04102	2023-03-29 04:00:00	Malfunction	STAAR SURGICAL COMPANY	2023-09-18 04:00:00	MTA	IMPLANTABLE COLLAMER LENS (ICL)	Inadequacy of Device Shape and/or Size	Appropriate Clinical Signs, Symptoms, Conditions Term / Code Not Available	P030016	1	Event Description: THE REPORTER INDICATED THAT THE SURGEON IMPLANTED A 12.6MM VICM5_12.6, -9.00 DIOPTER IMPLANTABLE COLLAMER LENS INTO THE PATIENT'S LEFT EYE (OS) ON (B)(6) 2023. THE SURGEON REPORTS THERE IS LOW VAULTING AND THERE WAS DECREASED NEAR VISION IN BRIGHT LIGHT. LENS REMAINS IMPLANTED WITH A PLANNED LENS EXCHANGED. THE CAUSE OF THE EVENT WAS REPORTED AS OTHER AND NOTED "BRIGHT LIGHT CO…
https://www.accessdata.fda.gov/scripts/cdrh/cfdocs/cfMAUDE/Detail.CFM?MDRFOI__ID=18341176&pc=MTA	2023826-2023-05644	2023-04-19 04:00:00	Injury	STAAR SURGICAL COMPANY	2023-12-15 05:00:00	MTA	IMPLANTABLE COLLAMER LENS (ICL)	Inadequacy of Device Shape and/or Size	Appropriate Clinical Signs, Symptoms, Conditions Term / Code Not Available	P030016	1	Event Description: THE REPORTER INDICATED THAT THE SURGEON IMPLANTED A 13.2MM VICM5_13.2 IMPLANTABLE COLLAMER LENS OF DIOPTER -16.0 INTO THE PATIENT'S LEFT EYE (OS) ON (B)(6) 2023. EXCESSIVE VAULTING WAS NOTED AND SIGNIFICANT REDUCTION OF IRIDO-CORNEAL ANGLES DESCRIBED AS "ANGLE 19.7°" WAS REPORTED. IT WAS ALSO MARKED THAT LENS REPOSITIONING DID NOT RESOLVE THE ISSUE; HOWEVER, NO REPOSITIONING DA…
https://www.accessdata.fda.gov/scripts/cdrh/cfdocs/cfMAUDE/Detail.CFM?MDRFOI__ID=18080759&pc=MTA	2023826-2023-04993	2023-04-25 04:00:00	Injury	STAAR SURGICAL COMPANY	2023-11-06 05:00:00	MTA	IMPLANTABLE COLLAMER LENS (ICL)	Inadequacy of Device Shape and/or Size	Appropriate Clinical Signs, Symptoms, Conditions Term / Code Not Available	P030016	1	Event Description: THE REPORTER INDICATED THAT THE SURGEON IMPLANTED A 12.6MM VICMO12.6; -5.0 DIOPTER IMPLANTABLE COLLAMER LENS INTO THE PATIENT'S LEFT EYE (OS) ON (B)(6) 2022. THE PATIENT EXPERIENCED EXCESSIVE VAULTING AND SIGNIFICANT REDUCTION OF IRIDO-CORNEAL ANGLES. ON (B)(6) 2023 THE LENS WAS EXCHANGED WITH A SHORTER LENGTH LENS AND THE PROBLEM WAS RESOLVED. THE CAUSE OF THE EVENT WAS REPORT…
https://www.accessdata.fda.gov/scripts/cdrh/cfdocs/cfMAUDE/Detail.CFM?MDRFOI__ID=17081937&pc=MTA	2023826-2023-02273	2023-04-26 04:00:00	Injury	STAAR SURGICAL COMPANY	2023-06-07 04:00:00	MTA	IMPLANTABLE COLLAMER LENS (ICL)	Inadequacy of Device Shape and/or Size	Appropriate Clinical Signs, Symptoms, Conditions Term / Code Not Available	P030016	1	Event Description: THE REPORTER INDICATED THAT THE SURGEON IMPLANTED A 12.6MM VICM5_12.6 IMPLANTABLE COLLAMER LENS OF DIOPTER -10.0 INTO THE PATIENT'S RIGHT EYE (OD) ON (B)(6) 2023. THE LENS WAS EXCHANGED ON (B)(6) 2023 FOR A LONGER LENGTH LENS DUE TO LOW VAULT. THIS RESOLVED THE PROBLEM. THE REPORTER DID NOT GIVE A CAUSE FOR THIS EVENT. Manufacturer Narrative: B5: THE REPORTER INDICATED THAT THE…
https://www.accessdata.fda.gov/scripts/cdrh/cfdocs/cfMAUDE/Detail.CFM?MDRFOI__ID=17167038&pc=MTA	2023826-2023-02367	2023-05-01 04:00:00	Injury	STAAR SURGICAL COMPANY	2023-06-20 04:00:00	MTA	IMPLANTABLE COLLAMER LENS (ICL)	Inadequacy of Device Shape and/or Size	Appropriate Clinical Signs, Symptoms, Conditions Term / Code Not Available	P030016	1	Event Description: THE REPORTER INDICATED THE SURGEON IMPLANTED A 12.6MM VICMO12.6 IMPLANTABLE COLLAMER LENS, -05.00 DIOPTER, IN THE PATIENTS LEFT EYE (OS), ON (B)(6) 2023. THE LENS WAS EXPLANTED ON (B)(6) 2023 DUE TO EXCESSIVE VAULTING AND SIGNIFICANT REDUCTION OF IRIDO-CORNEAL ANGLES. THE CORNEAL ENDOTHELIUM WAS EDEMATOUS AND THE CENTRAL ENDOTHELIUM WAS TURBID. THE AQUEOUS HUMOR WAS SPARKLING (…
https://www.accessdata.fda.gov/scripts/cdrh/cfdocs/cfMAUDE/Detail.CFM?MDRFOI__ID=17321985&pc=MTA	2023826-2023-02898	2023-06-16 04:00:00	Malfunction	STAAR SURGICAL COMPANY	2023-07-13 04:00:00	MTA	IMPLANTABLE COLLAMER LENS (ICL)	Inadequacy of Device Shape and/or Size	Appropriate Clinical Signs, Symptoms, Conditions Term / Code Not Available	P030016	1	Event Description: THE REPORTER INDICATED THAT THE SURGEON IMPLANTED A 13.2MM VICM5_13.2; -7.50 DIOPTER IMPLANTABLE COLLAMER LENS INTO THE PATIENT'S LEFT EYE (OS) ON 03-JUN-2020. THE PATIENT EXPERIENCED EXCESSIVE VAULTING AND SHALLOW ANGLE TEMPORAL. THE SURGEON NOTES THERE ARE NO SYMPTOMS AND PRESSURE IS NORMAL, SHALLOW TEMPORAL COMPARED TO NASAL. THE PATIENT IS HAPPY BUT VAULT IS HIGH AND TEMPOR…
https://www.accessdata.fda.gov/scripts/cdrh/cfdocs/cfMAUDE/Detail.CFM?MDRFOI__ID=17654640&pc=MTA	2023826-2023-03440	2023-08-07 04:00:00	Injury	STAAR SURGICAL COMPANY	2023-08-30 04:00:00	MTA	IMPLANTABLE COLLAMER LENS (ICL)	Inadequacy of Device Shape and/or Size	Appropriate Clinical Signs, Symptoms, Conditions Term / Code Not Available	P030016	1	Event Description: THE REPORTER INDICATED THAT A 13.7MM VICM5 13.7 IMPLANTABLE COLLAMER LENS OF -14.00 DIOPTER WAS IMPLANTED INTO THE PATIENTS LEFT EYE (OS) ON (B)(6) 2023. EXCESSIVE VAULT WAS OBSERVED WITH SIGNIFICANT REDUCTION OF IRIDOCORNEAL ANGLES.. THE LENS REMAINS IMPLANTED. REPORTER STATES. "PATIENT SCHEDULED FOR REPLACEMENT OF ICL." IF ADDITIONAL INFORMATION IS RECEIVED A SUPPLEMENTAL MED…
https://www.accessdata.fda.gov/scripts/cdrh/cfdocs/cfMAUDE/Detail.CFM?MDRFOI__ID=17932866&pc=MTA	2023826-2023-04401	2023-09-05 04:00:00	Injury	STAAR SURGICAL COMPANY	2023-10-13 04:00:00	MTA	IMPLANTABLE COLLAMER LENS (ICL)	Inadequacy of Device Shape and/or Size	Appropriate Clinical Signs, Symptoms, Conditions Term / Code Not Available	P030016	1	Event Description: THE REPORTER INDICATED THE SURGEON IMPLANTED A 13.2MM VICM5_13.2 IMPLANTABLE COLLAMER LENS, -08.50 DIOPTER, INTO THE PATIENTS LEFT EYE (OS) ON (B)(6) 2023. THE LENS WAS REMOVED ON (B)(6) 2023 DUE TO EXCESSIVE VAULTING AND SIGNIFICANT REDUCTION OF IRIDO-CORNEAL ANGLES. THE LENS WAS REPLACED WITH A SHORTER LENS AND THE PROBLEM WAS RESOLVED. THE CAUSE OF THE EVENT WAS UNKNOWN. Man…
https://www.accessdata.fda.gov/scripts/cdrh/cfdocs/cfMAUDE/Detail.CFM?MDRFOI__ID=18414575&pc=MTA	2023826-2023-05821	2023-09-15 04:00:00	Injury	STAAR SURGICAL COMPANY	2023-12-28 05:00:00	MTA	IMPLANTABLE COLLAMER LENS (ICL)	Inadequacy of Device Shape and/or Size	Appropriate Clinical Signs, Symptoms, Conditions Term / Code Not Available	P030016	1	Event Description: THE REPORTER INDICATED THAT THE SURGEON IMPLANTED A 12.6MM VICMO12.6 IMPLANTABLE COLLAMER LENS OF DIOPTER -5.0 INTO THE PATIENT'S LEFT EYE (OS) ON (B)(6) 2023. THE LENS WAS REMOVED ON (B)(6) 2023 DUE TO EXCESSIVE VAULT AND SIGNIFICANT REDUCTION OF IRIDO-CORNEAL ANGLES. IN A SEPARATE SURGERY THAT DAY A SHORTER LENGTH LENS WAS IMPLANTED AND THE PROBLEM RESOLVED. CAUSE OF EVENT RE…
https://www.accessdata.fda.gov/scripts/cdrh/cfdocs/cfMAUDE/Detail.CFM?MDRFOI__ID=18414605&pc=MTA	2023826-2023-05820	2023-09-15 04:00:00	Injury	STAAR SURGICAL COMPANY	2023-12-28 05:00:00	MTA	IMPLANTABLE COLLAMER LENS (ICL)	Inadequacy of Device Shape and/or Size	Appropriate Clinical Signs, Symptoms, Conditions Term / Code Not Available	P030016	1	Event Description: THE REPORTER INDICATED THAT THE SURGEON IMPLANTED A 12.6MM VICMO12.6 IMPLANTABLE COLLAMER LENS OF DIOPTER -5.5 INTO THE PATIENT'S RIGHT EYE (OD) ON (B)(6) 2023. THE LENS WAS REMOVED ON (B)(6) 2023 DUE TO EXCESSIVE VAULT AND SIGNIFICANT REDUCTION OF IRIDO-CORNEAL ANGLES. IN A SEPARATE SURGERY THAT DAY A SHORTER LENGTH LENS WAS IMPLANTED AND THE PROBLEM RESOLVED. CAUSE OF EVENT R…
https://www.accessdata.fda.gov/scripts/cdrh/cfdocs/cfMAUDE/Detail.CFM?MDRFOI__ID=18166351&pc=MTA	2023826-2023-05180	2023-09-25 04:00:00	Injury	STAAR SURGICAL COMPANY	2023-11-17 05:00:00	MTA	IMPLANTABLE COLLAMER LENS (ICL)	Inadequacy of Device Shape and/or Size	Appropriate Clinical Signs, Symptoms, Conditions Term / Code Not Available	P030016	1	Event Description: THE REPORTER INDICATED THAT THE SURGEON IMPLANTED A 13.7MM VICM5 13.7 IMPLANTABLE COLLAMER LENS OF -8.0 INTO THE PATIENTS RIGHT EYE (OD) ON (B)(6) 2023. EXCESSIVE VAULT WAS OBSERVED WITH SIGNIFICANT REDUCTION OF IRIDOCORNEAL ANGLES. ON (B)(6) 2023 THE LENS WAS EXPLANTED AND ON THE SAME DAY DIFFERENT SURGERY A REPLACEMENT OF SHORTER LENGTH WAS IMPLANTED AND THE PROBLEM WAS RESOL…
https://www.accessdata.fda.gov/scripts/cdrh/cfdocs/cfMAUDE/Detail.CFM?MDRFOI__ID=18414574&pc=MTA	2023826-2023-05824	2023-10-11 04:00:00	Injury	STAAR SURGICAL COMPANY	2023-12-28 05:00:00	MTA	IMPLANTABLE COLLAMER LENS (ICL)	Inadequacy of Device Shape and/or Size	Appropriate Clinical Signs, Symptoms, Conditions Term / Code Not Available	P030016	1	Event Description: THE REPORTER INDICATED THAT THE SURGEON IMPLANTED A 13.2MM VICM5_13.2 IMPLANTABLE COLLAMER LENS OF DIOPTER -13.0 INTO THE PATIENT'S LEFT EYE (OS) ON (B)(6) 2023. THE LENS WAS EXPLANTED ON (B)(6) 2023 DUE TO EXCESSIVE VAULT AND SIGNIFICANT REDUCTION OF IRIDO-CORNEAL ANGLES. IN A SEPARATE SURGERY THAT DAY A LENS TWO SIZES SHORTER IN LENGTH WAS IMPLANTED AND THE PROBLEM WAS RESOLV…
https://www.accessdata.fda.gov/scripts/cdrh/cfdocs/cfMAUDE/Detail.CFM?MDRFOI__ID=18472104&pc=MTA	2023826-2024-00113	2023-11-07 05:00:00	Injury	STAAR SURGICAL COMPANY	2024-01-08 05:00:00	MTA	IMPLANTABLE COLLAMER LENS (ICL)	Inadequacy of Device Shape and/or Size	Appropriate Clinical Signs, Symptoms, Conditions Term / Code Not Available	P030016	1	Event Description: THE REPORTER INDICATED THAT A 13.7MM VICM5_13.7 IMPLANTABLE COLLAMER LENS OF -12.50 DIOPTER WAS IMPLANTED INTO THE PATIENT'S LEFT EYE (OS) ON (B)(6) 2023. ON (B)(6) 2023 THE LENS WAS EXCHANGED WITH A SHORTER LENGTH LENS DUE TO EXCESSIVE VAULT AND SIGNIFICANT REDUCTION OF IRIDOCORNEAL ANGLES. THE EXCHANGE RESOLVED THE PROBLEM, THE REPORTER STATED " VAULT REDUCED TO NORMAL AND PA…
https://www.accessdata.fda.gov/scripts/cdrh/cfdocs/cfMAUDE/Detail.CFM?MDRFOI__ID=11010454&pc=MTA	2023826-2020-03078		Injury	STAAR SURGICAL COMPANY	2020-12-15 05:00:00	MTA	IMPLANTABLE COLLAMER LENS (ICL)	Inadequacy of Device Shape and/or Size	Appropriate Clinical Signs, Symptoms, Conditions Term / Code Not Available	N/A	1	Event Description: THE REPORTER INDICATED THAT A 13.2MM, VICM5_13.2,-5.00 DIOPTER, IMPLANTABLE COLLAMER LENS WAS IMPLANTED INTO THE PATIENTS RIGHT EYE (OD) ON (B)(6) 2020. ON (B)(6) 2020 THE LENS WAS EXCHANGED FOR A SHORTER LENGTH LENS DUE TO EXCESSIVE VAULT AND SIGNIFICANT REDUCTION OF ICA. THIS EXCHANGE RESOLVED THE PROBLEM. Manufacturer Narrative: ADDITIONAL INFORMATION: H3- DEVICE EVALUATION:…
https://www.accessdata.fda.gov/scripts/cdrh/cfdocs/cfMAUDE/Detail.CFM?MDRFOI__ID=11119581&pc=MTA	2023826-2021-00005		Malfunction	STAAR SURGICAL COMPANY	2021-01-05	MTA	IMPLANTABLE COLLAMER LENS (ICL)	Inadequacy of Device Shape and/or Size	Appropriate Clinical Signs, Symptoms, Conditions Term / Code Not Available	P030016	1	Event Description: THE REPORTER INDICATED THE SURGEON IMPLANTED AN IMPLANTABLE COLLAMER LENS, IN THE PATIENTS LEFT EYE (OS). THE LENS WAS REPORTED AS HAVING HIGH VAULTING AND NARROW ANTERIOR CHAMBER ANGLES BUT WITH NORMAL INTRAOCULAR PRESSURE. ADDITIONAL INFORMATION HAS BEEN REQUESTED BUT NONE HAS BEEN FORTHCOMING. IF ADDITIONAL INFORMATION IS RECEIVED, A SUPPLEMENTAL MEDWATCH WILL BE SUBMITTED. …
https://www.accessdata.fda.gov/scripts/cdrh/cfdocs/cfMAUDE/Detail.CFM?MDRFOI__ID=11119599&pc=MTA	2023826-2021-00006		Malfunction	STAAR SURGICAL COMPANY	2021-01-05	MTA	IMPLANTABLE COLLAMER LENS (ICL)	Inadequacy of Device Shape and/or Size	Appropriate Clinical Signs, Symptoms, Conditions Term / Code Not Available	P030016	1	Event Description: THE REPORTER INDICATED THE SURGEON IMPLANTED AN IMPLANTABLE COLLAMER LENS, IN THE PATIENTS RIGHT EYE (OD). THE LENS WAS REPORTED AS HAVING HIGH VAULTING AND NARROW ANTERIOR CHAMBER ANGLES BUT WITH NORMAL INTRAOCULAR PRESSURE. ADDITIONAL INFORMATION HAS BEEN REQUESTED BUT NONE HAS BEEN FORTHCOMING. IF ADDITIONAL INFORMATION IS RECEIVED, A SUPPLEMENTAL MEDWATCH WILL BE SUBMITTED.…
https://www.accessdata.fda.gov/scripts/cdrh/cfdocs/cfMAUDE/Detail.CFM?MDRFOI__ID=12119242&pc=MTA	2023826-2021-02325		Malfunction	STAAR SURGICAL COMPANY	2021-07-05	MTA	IMPLANTABLE COLLAMER LENS (ICL)	Inadequacy of Device Shape and/or Size	Appropriate Clinical Signs, Symptoms, Conditions Term / Code Not Available	NA	1	Event Description: THE REPORTER INDICATED THAT THE SURGEON IMPLANTED AN IMPLANTABLE COLLAMER LENS INTO THE PATIENT'S EYE. THE SURGEON REPORTS EXCESSIVE VAULT AND SHALLOW AC. REPORTEDLY, THE LENS REMAINS IMPLANTED. ATTEMPTS TO OBTAIN ADDITIONAL INFORMATION HAVE NOT BEEN SUCCESSFUL. Manufacturer Narrative: PRODUCT CODE: UNK; ESUBMITTER SOFTWARE DOES NOT ALLOW FOR BLANK OR UNK ENTRY PMA/510(K): THIS…
https://www.accessdata.fda.gov/scripts/cdrh/cfdocs/cfMAUDE/Detail.CFM?MDRFOI__ID=13082714&pc=MTA	2023826-2021-04988		Injury	STAAR SURGICAL COMPANY	2021-12-23 05:00:00	MTA	IMPLANTABLE COLLAMER LENS (ICL)	Inadequacy of Device Shape and/or Size	Appropriate Clinical Signs, Symptoms, Conditions Term / Code Not Available	NA	1	Event Description: AN ARTICLE WAS RECEIVED FOR "URRETS-ZAVALIA SYNDROME AFTER IMPLANTATION OF A PHAKIC INTRAOCULAR LENS". THE REPORTER INDICATED THE SURGEON IMPLANTED AN ICL IMPLANTABLE COLLAMER LENS, INTO THE PATIENTS LEFT EYE (OS). THE LENS WAS REPORTED AS OVERSIZED AND WAS EXPLANTED AND EXCHANGED FOR A SHORTER LENS LENGTH. A FEW WEEKS LATER, THE PATIENT HAD AN ATONIC, MID-DILATED PUPIL, WITH N…
https://www.accessdata.fda.gov/scripts/cdrh/cfdocs/cfMAUDE/Detail.CFM?MDRFOI__ID=13911479&pc=MTA	2023826-2022-00971		Malfunction	STAAR SURGICAL COMPANY	2022-03-25 04:00:00	MTA	IMPLANTABLE COLLAMER LENS (ICL)	Inadequacy of Device Shape and/or Size	Appropriate Clinical Signs, Symptoms, Conditions Term / Code Not Available	N/A	1	Event Description: THE REPORTER INDICATED THE SURGEON IMPLANTED A 13.2MM VICM5_13.2 IMPLANTABLE COLLAMER LENS, DIOPTER -10.0 INTO THE PATIENT'S LEFT EYE (OS) ON (B)(6) 2022. THE SURGEON REPORTS SHALLOW VAULT AND RESIDUAL AMETROPIA. REPORTEDLY, THE LENS REMAINS IMPLANTED AND WILL BE MONITORED, "SINCE THERE ARE SOME MILD ANTERIOR CAPSULE CHANGES AND I DO NOT WANT TO GO BACK IN." Manufacturer Narrat…
https://www.accessdata.fda.gov/scripts/cdrh/cfdocs/cfMAUDE/Detail.CFM?MDRFOI__ID=13911490&pc=MTA	2023826-2022-00970		Malfunction	STAAR SURGICAL COMPANY	2022-03-25 04:00:00	MTA	IMPLANTABLE COLLAMER LENS (ICL)	Inadequacy of Device Shape and/or Size	Appropriate Clinical Signs, Symptoms, Conditions Term / Code Not Available	N/A	1	Event Description: THE REPORTER INDICATED THE SURGEON IMPLANTED A 13.2MM VICM5_13.2 IMPLANTABLE COLLAMER LENS, DIOPTER -9.0 INTO THE PATIENT'S RIGHT EYE (OD) ON (B)(6) 2022. THE SURGEON REPORTS LOW VAULT AND RESIDUAL AMETROPIA. REPORTEDLY, THE LENS REMAINS IMPLANTED. Manufacturer Narrative: WEIGHT, ETHNICITY, RACE: UNK. DATE OF EVENT: UNK. PMA/510(K): THIS PRODUCT IS MANUFACTURED IN THE U.S. BUT …
https://www.accessdata.fda.gov/scripts/cdrh/cfdocs/cfMAUDE/Detail.CFM?MDRFOI__ID=14079181&pc=MTA	2023826-2022-01109		Injury	STAAR SURGICAL COMPANY	2022-04-11 04:00:00	MTA	IMPLANTABLE COLLAMER LENS (ICL)	Inadequacy of Device Shape and/or Size	Appropriate Clinical Signs, Symptoms, Conditions Term / Code Not Available		1	Event Description: THE REPORTER INDICATED THAT A 13.2MM IMPLANTABLE COLLAMER LENS OF UNKNOWN MODEL WAS IMPLANTED INTO THE PATIENT'S EYE ON AN UNKNOWN DATE. 1300 MICRON VAULT WITH SOME DEGREE OF IRIS CHAFING WAS OBSERVED. THE LENS REMAINS IMPLANTED. NO FURTHER INFORMATION HAS BEEN PROVIDED. ATTEMPTS TO OBTAIN ADDITIONAL INFORMATION HAVE NOT BEEN SUCCESSFUL. IF ADDITIONAL INFORMATION IS RECEIVED A …
https://www.accessdata.fda.gov/scripts/cdrh/cfdocs/cfMAUDE/Detail.CFM?MDRFOI__ID=14524935&pc=MTA	2023826-2022-01697		Injury	STAAR SURGICAL COMPANY	2022-05-27 04:00:00	MTA	IMPLANTABLE COLLAMER LENS (ICL)	Inadequacy of Device Shape and/or Size	Appropriate Clinical Signs, Symptoms, Conditions Term / Code Not Available	P030016	1	Event Description: THE REPORTER INDICATED THAT THE SURGEON IMPLANTED A 12.6MM VICM5_12.6; -7.50 DIOPTER IMPLANTABLE COLLAMER LENS INTO THE PATIENT'S LEFT EYE (OS) ON (B)(6) 2021. THE PATIENT EXPERIENCED EXCESSIVE VAULTING AND SIGNIFICANT REDUCTION OF IRIDO-CORNEAL ANGLES. ON (B)(6) 2022 THE LENS WAS EXCHANGED FOR A SHORTER LENGTH LENS AND THIS RESOLVED THE PROBLEM. THE CAUSE OF THE EVENT WAS REPO…
https://www.accessdata.fda.gov/scripts/cdrh/cfdocs/cfMAUDE/Detail.CFM?MDRFOI__ID=14525054&pc=MTA	2023826-2022-01698		Injury	STAAR SURGICAL COMPANY	2022-05-27 04:00:00	MTA	IMPLANTABLE COLLAMER LENS (ICL)	Inadequacy of Device Shape and/or Size	Appropriate Clinical Signs, Symptoms, Conditions Term / Code Not Available	P030016	1	Event Description: THE REPORTER INDICATED THAT THE SURGEON IMPLANTED A 12.6MM VICM5_12.6; -7.50 DIOPTER IMPLANTABLE COLLAMER LENS INTO THE PATIENT'S RIGHT EYE (OD) ON (B)(6) 2021. THE PATIENT EXPERIENCED EXCESSIVE VAULTING AND SIGNIFICANT REDUCTION OF IRIDO-CORNEAL ANGLES. ON (B)(6) 2022 THE LENS WAS EXCHANGED FOR A SHORTER LENGTH LENS AND THIS RESOLVED THE PROBLEM. THE CAUSE OF THE EVENT WAS REP…
https://www.accessdata.fda.gov/scripts/cdrh/cfdocs/cfMAUDE/Detail.CFM?MDRFOI__ID=15048522&pc=MTA	2023826-2022-02304		Malfunction	STAAR SURGICAL COMPANY	2022-07-18 04:00:00	MTA	IMPLANTABLE COLLAMER LENS (ICL)	Inadequacy of Device Shape and/or Size	Appropriate Clinical Signs, Symptoms, Conditions Term / Code Not Available	P030016	1	Event Description: THE REPORTER INDICATED THAT A 13.2MM, VICMO13.2, -16.0 DIOPTER IMPLANTABLE COLLAMER LENS WAS IMPLANTED INTO THE PATIENTS LEFT EYE (OS) ON (B)(6) 2022. THE PATIENT EXPERIENCED HIGH VAULT AND NARROW ANGLES, LENS REMAINS IMPLANTED. THE REPORTER STATED THAT THE PATIENT IS DOING WELL, IOP 17/18 EXCELLENT VISION 20/20. IF ADDITIONAL INFORMATION IS RECEIVED A SUPPLEMENTAL MEDWATCH REP…
https://www.accessdata.fda.gov/scripts/cdrh/cfdocs/cfMAUDE/Detail.CFM?MDRFOI__ID=15352616&pc=MTA	2023826-2022-03014		Malfunction	STAAR SURGICAL COMPANY	2022-09-02 04:00:00	MTA	IMPLANTABLE COLLAMER LENS (ICL)	Inadequacy of Device Shape and/or Size	Appropriate Clinical Signs, Symptoms, Conditions Term / Code Not Available	P030016	1	Event Description: THE REPORTER INDICATED THAT THE SURGEON IMPLANTED AN IMPLANTABLE COLLAMER LENS INTO THE PATIENT'S LEFT EYE (OS). THE SURGEON NOW REPORTS THE LENS IS OVERSIZED AND CAUSING NARROW ANGLES AND LARGE VAULTS. LENS REMAINS IMPLANTED. ATTEMPTS TO OBTAIN ADDITIONAL INFORMATION HAVE NOT BEEN SUCCESSFUL. IF ADDITIONAL INFORMATION IS RECEIVED A SUPPLEMENTAL MEDWATCH REPORT WILL BE SUBMITTE…
https://www.accessdata.fda.gov/scripts/cdrh/cfdocs/cfMAUDE/Detail.CFM?MDRFOI__ID=15352617&pc=MTA	2023826-2022-03013		Malfunction	STAAR SURGICAL COMPANY	2022-09-02 04:00:00	MTA	IMPLANTABLE COLLAMER LENS (ICL)	Inadequacy of Device Shape and/or Size	Appropriate Clinical Signs, Symptoms, Conditions Term / Code Not Available	P030016	1	Event Description: THE REPORTER INDICATED THAT THE SURGEON IMPLANTED AN IMPLANTABLE COLLAMER LENS INTO THE PATIENT'S RIGHT EYE (OD). THE SURGEON NOW REPORTS THE LENS IS OVERSIZED AND CAUSING NARROW ANGLES AND LARGE VAULTS. LENS REMAINS IMPLANTED. ATTEMPTS TO OBTAIN ADDITIONAL INFORMATION HAVE NOT BEEN SUCCESSFUL. IF ADDITIONAL INFORMATION IS RECEIVED A SUPPLEMENTAL MEDWATCH REPORT WILL BE SUBMITT…
https://www.accessdata.fda.gov/scripts/cdrh/cfdocs/cfMAUDE/Detail.CFM?MDRFOI__ID=15588726&pc=MTA	2023826-2022-03598		Injury	STAAR SURGICAL COMPANY	2022-10-12 04:00:00	MTA	IMPLANTABLE COLLAMER LENS (ICL)	Inadequacy of Device Shape and/or Size	Appropriate Clinical Signs, Symptoms, Conditions Term / Code Not Available	P030016	1	Event Description: THE REPORTER INDICATED THAT A 13.2MM VICM5_13.2 IMPLANTABLE COLLAMER LENS -5.0DIOPTER WAS IMPLANTED INTO THE PATIENT'S LEFT EYE (OS) ON (B)(6) 2021. ON (B)(6) 2021 THE LENS WAS EXCHANGED FOR A SHORTER LENGTH LENS DUE TO EXCESSIVE VAULT AND SIGNIFICANT REDUCTION OF IRIDOCORNEAL ANGLES. THE EXCHANGE RESOLVED THE PROBLEM. CAUSE WAS REPORTED AS DEVICE. Manufacturer Narrative: DEVIC…
https://www.accessdata.fda.gov/scripts/cdrh/cfdocs/cfMAUDE/Detail.CFM?MDRFOI__ID=15591717&pc=MTA	2023826-2022-03485		Malfunction	STAAR SURGICAL COMPANY	2022-10-12 04:00:00	MTA	IMPLANTABLE COLLAMER LENS (ICL)	Inadequacy of Device Shape and/or Size	Appropriate Clinical Signs, Symptoms, Conditions Term / Code Not Available	P030016	1	Event Description: THE REPORTER INDICATED THE SURGEON IMPLANTED A 12.6MM ICL IMPLANTABLE COLLAMER LENS AND THE LENS WAS REPORTED AS HIGH VAULTING, WITH NARROW ANGLES. THE LENS REMAINED IMLANTED. ADDITIONAL INFORMATION HAS BEEN REQUESTED BUT NONE HAS BEEN FORTHCOMING. Manufacturer Narrative: (B)(4).
https://www.accessdata.fda.gov/scripts/cdrh/cfdocs/cfMAUDE/Detail.CFM?MDRFOI__ID=17061119&pc=MTA	2023826-2023-02040		Injury	STAAR SURGICAL COMPANY	2023-06-05 04:00:00	MTA	IMPLANTABLE COLLAMER LENS (ICL)	Inadequacy of Device Shape and/or Size	Appropriate Clinical Signs, Symptoms, Conditions Term / Code Not Available	P030016	1	Event Description: THE REPORTER INDICATED THAT THE SURGEON IMPLANTED A 13.2MM VICM5 13.2, -04.50 DIOPTER, IMPLANTABLE COLLAMER LENS INTO THE PATIENT'S LEFT EYE (OS) ON (B)(6) 2023. THE LENS WAS REPOSITIONED ON (B)(6) 2023 DUE TO SIGNIFICANT REDUCTION OF IRIDO CORNEAL ANGLES AND EXCESSIVE VAULT AND DID NOT RESOLVE THE PROBLEM. THE LENS WAS REPLACED WITH A SHORTER LENGTH LENS ON (B)(6) 2023. THIS R…
https://www.accessdata.fda.gov/scripts/cdrh/cfdocs/cfMAUDE/Detail.CFM?MDRFOI__ID=17297497&pc=MTA	2023826-2023-02782		Malfunction	STAAR SURGICAL COMPANY	2023-07-11 04:00:00	MTA	IMPLANTABLE COLLAMER LENS (ICL)	Inadequacy of Device Shape and/or Size	Appropriate Clinical Signs, Symptoms, Conditions Term / Code Not Available	P030016	1	Event Description: THE REPORTER INDICATED THAT THE SURGEON IMPLANTED AN IMPLANTABLE COLLAMER LENS INTO THE PATIENT'S EYE ON (B)(6) 2023. HIGHER VAULT OUTCOME AND PIGMENTATION WAS OBSERVED. LENS REMAINS IMPLANTED. ADDITIONAL INFORMATION HAS BEEN REQUESTED BUT NONE HAS BEEN FORTHCOMING. Manufacturer Narrative: A1- UNK, A2 - UNK, A3 - UNK, A4 - UNK, A5 - UNK, A6 - UNK, B3 - UNK, D2 - PRODUCT CODE: U…
https://www.accessdata.fda.gov/scripts/cdrh/cfdocs/cfMAUDE/Detail.CFM?MDRFOI__ID=17297511&pc=MTA	2023826-2023-02781		Malfunction	STAAR SURGICAL COMPANY	2023-07-11 04:00:00	MTA	IMPLANTABLE COLLAMER LENS (ICL)	Inadequacy of Device Shape and/or Size	Appropriate Clinical Signs, Symptoms, Conditions Term / Code Not Available	P030016	1	Event Description: THE REPORTER INDICATED THAT THE SURGEON IMPLANTED AN IMPLANTABLE COLLAMER LENS INTO THE PATIENT'S EYE ON (B)(6) 2023. HIGHER VAULT OUTCOME AND PIGMENTATION WAS OBSERVED. LENS REMAINS IMPLANTED. ADDITIONAL INFORMATION HAS BEEN REQUESTED BUT NONE HAS BEEN FORTHCOMING. Manufacturer Narrative: H6 - HEALTH EFFECT CLINICAL CODE 4581: IRIS PIGMENTATION. (B)(4).
https://www.accessdata.fda.gov/scripts/cdrh/cfdocs/cfMAUDE/Detail.CFM?MDRFOI__ID=17619768&pc=MTA	2023826-2023-03600		Injury	STAAR SURGICAL COMPANY	2023-08-24 04:00:00	MTA	IMPLANTABLE COLLAMER LENS (ICL)	Inadequacy of Device Shape and/or Size	Appropriate Clinical Signs, Symptoms, Conditions Term / Code Not Available	P030016	1	Event Description: THE REPORTER INDICATED THAT A 13.2MM VICM5_13.2 IMPLANTABLE COLLAMER LENS -5.00 DIOPTER WAS IMPLANTED INTO THE PATIENT'S RIGHT EYE (OD) ON (B)(6) 2022. ON (B)(6) 2022 THE LENS WAS EXPLANTED DUE TO EXCESSIVE VAULT AND SIGNIFICANT REDUCTION OF IRIDOCORNEAL ANGLES. ON (B)(6) 2022 A REPLACEMENT LENS OF SHORTER LENGTH WAS IMPLANTED AND THE PROBLEM RESOLVED. CAUSE OF EVENT WAS UNKNOW…
https://www.accessdata.fda.gov/scripts/cdrh/cfdocs/cfMAUDE/Detail.CFM?MDRFOI__ID=17619877&pc=MTA	2023826-2023-03601		Injury	STAAR SURGICAL COMPANY	2023-08-24 04:00:00	MTA	IMPLANTABLE COLLAMER LENS (ICL)	Inadequacy of Device Shape and/or Size	Appropriate Clinical Signs, Symptoms, Conditions Term / Code Not Available	P030016	1	Event Description: THE REPORTER INDICATED THAT A 13.2MM VICM5_13.2 IMPLANTABLE COLLAMER LENS -6.00 DIOPTER WAS IMPLANTED INTO THE PATIENT'S LEFT EYE (OS) ON (B)(6) 2022. ON (B)(6) 2022 THE LENS WAS EXPLANTED DUE TO EXCESSIVE VAULT AND SIGNIFICANT REDUCTION OF IRIDOCORNEAL ANGLES. ON (B)(6) 2022 A REPLACEMENT LENS OF SHORTER LENGTH WAS IMPLANTED AND THE PROBLEM RESOLVED. CAUSE OF EVENT WAS UNKNOWN…
https://www.accessdata.fda.gov/scripts/cdrh/cfdocs/cfMAUDE/Detail.CFM?MDRFOI__ID=17741311&pc=MTA	2023826-2023-04039		Injury	STAAR SURGICAL COMPANY	2023-09-13 04:00:00	MTA	IMPLANTABLE COLLAMER LENS (ICL)	Inadequacy of Device Shape and/or Size	Appropriate Clinical Signs, Symptoms, Conditions Term / Code Not Available	P030016	1	Event Description: THE REPORTER INDICATED THAT THE SURGEON IMPLANTED AN IMPLANTABLE COLLAMER LENS INTO THE PATIENT'S EYE. IT WAS REPORTED THE PATIENT HAS LOW VAULTING WITH CLOSED ANGLES. LENS REMAINS IMPLANTED. ATTEMPTS TO OBTAIN ADDITIONAL INFORMATION HAVE NOT BEEN SUCCESSFUL. IF ADDITIONAL INFORMATION IS RECEIVED A SUPPLEMENTAL MEDWATCH REPORT WILL BE SUBMITTED. Manufacturer Narrative: H6 - HEA…
https://www.accessdata.fda.gov/scripts/cdrh/cfdocs/cfMAUDE/Detail.CFM?MDRFOI__ID=17750760&pc=MTA	2023826-2023-04068		Injury	STAAR SURGICAL COMPANY	2023-09-14 04:00:00	MTA	IMPLANTABLE COLLAMER LENS (ICL)	Inadequacy of Device Shape and/or Size	Appropriate Clinical Signs, Symptoms, Conditions Term / Code Not Available	P030016	1	Event Description: THE REPORTER INDICATED THAT THE SURGEON IMPLANTED AN IMPLANTABLE COLLAMER LENS INTO THE PATIENT'S LEFT EYE (OS). THE SURGEON REPORTS THAT THE PATIENT HAS LOW VAULTING WITH CLOSED ANGLES. LENS REMAINS IMPLANTED. ATTEMPTS TO OBTAIN ADDITIONAL INFORMATION HAVE NOT BEEN SUCCESSFUL. IF ADDITIONAL INFORMATION IS RECEIVED A SUPPLEMENTAL MEDWATCH REPORT WILL BE SUBMITTED. Manufacturer …
https://www.accessdata.fda.gov/scripts/cdrh/cfdocs/cfMAUDE/Detail.CFM?MDRFOI__ID=17865574&pc=MTA	2023826-2023-04411		Injury	STAAR SURGICAL COMPANY	2023-10-03 04:00:00	MTA	IMPLANTABLE COLLAMER LENS (ICL)	Inadequacy of Device Shape and/or Size	Appropriate Clinical Signs, Symptoms, Conditions Term / Code Not Available	P030016	1	Event Description: THE REPORTER INDICATED THAT THE SURGEON IMPLANTED AN IMPLANTABLE COLLAMER LENS INTO THE PATIENT'S RIGHT EYE (OD) ON (B)(6) 2023. THE LENS WAS EXPLANTED ON (B)(6) 2023 DUE TO THE LENS BEING TOO LARGE AND THE ANTERIOR CAMBER IS TOO SHALLOW. Manufacturer Narrative: H6 - HEALTH EFFECT CLINICAL CODE: 4581 - ANTERIOR CAMBER TOO SHALLOW. CLAIM# (B)(4).
https://www.accessdata.fda.gov/scripts/cdrh/cfdocs/cfMAUDE/Detail.CFM?MDRFOI__ID=17865575&pc=MTA	2023826-2023-04412		Injury	STAAR SURGICAL COMPANY	2023-10-03 04:00:00	MTA	IMPLANTABLE COLLAMER LENS (ICL)	Inadequacy of Device Shape and/or Size	Appropriate Clinical Signs, Symptoms, Conditions Term / Code Not Available	P030016	1	Event Description: THE REPORTER INDICATED THAT THE SURGEON IMPLANTED AN IMPLANTABLE COLLAMER LENS INTO THE PATIENT'S LEFT EYE (OS) ON (B)(6) 2023. THE LENS WAS EXPLANTED ON (B)(6) 2023 DUE TO THE LENS BEING TOO LARGE AND THE ANTERIOR CHAMBER IS TOO SHALLOW. Manufacturer Narrative: H6 - HEALTH EFFECT CLINICAL CODE: 4581 - ANTERIOR CAMBER TOO SHALLOW. CLAIM# (B)(4).
https://www.accessdata.fda.gov/scripts/cdrh/cfdocs/cfMAUDE/Detail.CFM?MDRFOI__ID=17978644&pc=MTA	2023826-2023-04565		Injury	STAAR SURGICAL COMPANY	2023-10-20 04:00:00	MTA	IMPLANTABLE COLLAMER LENS (ICL)	Inadequacy of Device Shape and/or Size	Appropriate Clinical Signs, Symptoms, Conditions Term / Code Not Available	P030016	1	Event Description: THE REPORTER INDICATED THE SURGEON IMPLANTED A 13.2MM VICM5_13.2 IMPLANTABLE COLLAMER LENS, -08.50 DIOPTER, INTO THE PATIENTS RIGHT EYE (OD) ON (B)(6) 2023. THE LENS WAS REMOVED ON (B)(6) 2023 DUE TO EXCESSIVE VAULTING AND SIGNIFICANT REDUCTION OF IRIDO-CORNEAL ANGLES. THE LENS WAS REPLACED WITH A SHORTER LENS AND THE PROBLEM WAS RESOLVED. ADDITIONAL INFORMATION HAS BEEN REQUES…
https://www.accessdata.fda.gov/scripts/cdrh/cfdocs/cfMAUDE/Detail.CFM?MDRFOI__ID=18067949&pc=MTA	2023826-2023-04758		Injury	STAAR SURGICAL COMPANY	2023-11-03 04:00:00	MTA	IMPLANTABLE COLLAMER LENS (ICL)	Inadequacy of Device Shape and/or Size	Appropriate Clinical Signs, Symptoms, Conditions Term / Code Not Available	P030016	1	Event Description: THE REPORTER INDICATED THE SURGEON IMPLANTED A 13.2MM VICM5_13.2 IMPLANTABLE COLLAMER LENS, -05.50 DIOPTER, INTO THE PATIENTS LEFT EYE (OS) ON (B)(6) 2022. THE LENS WAS REPORTED AS LOW VAULTING AND PATIENT EXPERIENCED REFRACTIVE CHANGE OVERTIME. THE LENS REMAINED IMPLANTED. THE CAUSE OF THE EVENT WAS UNKNOWN. ADDITIONAL INFORMATION HAS BEEN REQUESTED BUT NONE HAS BEEN FORTHCOMI…
https://www.accessdata.fda.gov/scripts/cdrh/cfdocs/cfMAUDE/Detail.CFM?MDRFOI__ID=18234786&pc=MTA	2023826-2023-05389		Malfunction	STAAR SURGICAL COMPANY	2023-11-29 05:00:00	MTA	IMPLANTABLE COLLAMER LENS (ICL)	Inadequacy of Device Shape and/or Size	Appropriate Clinical Signs, Symptoms, Conditions Term / Code Not Available	P030016	1	Event Description: THE REPORTER INDICATED THAT AN IMPLANTABLE COLLAMER LENS WAS IMPLANTED INTO THE PATIENT'S EYE. THE SURGEON REPORTS HIGH VAULT AND NARROW ANGLES. LENS REMAINS IMPLANTED. IF ADDITIONAL INFORMATION IS RECEIVED A SUPPLEMENTAL MEDWATCH REPORT WILL BE SUBMITTED. Manufacturer Narrative: H6- HEALTH EFFECT- CLINICAL CODE 4581: NARROW ANGLES. CLAIM#: (B)(4).
https://www.accessdata.fda.gov/scripts/cdrh/cfdocs/cfMAUDE/Detail.CFM?MDRFOI__ID=18234792&pc=MTA	2023826-2023-05390		Malfunction	STAAR SURGICAL COMPANY	2023-11-29 05:00:00	MTA	IMPLANTABLE COLLAMER LENS (ICL)	Inadequacy of Device Shape and/or Size	Appropriate Clinical Signs, Symptoms, Conditions Term / Code Not Available	P030016	1	Event Description: THE REPORTER INDICATED THAT AN IMPLANTABLE COLLAMER LENS WAS IMPLANTED INTO THE PATIENT'S EYE. THE SURGEON REPORTS HIGH VAULT AND NARROW ANGLES. LENS REMAINS IMPLANTED. IF ADDITIONAL INFORMATION IS RECEIVED A SUPPLEMENTAL MEDWATCH REPORT WILL BE SUBMITTED. Manufacturer Narrative: H6- HEALTH EFFECT- CLINICAL CODE 4581: NARROW ANGLES. (B)(4)
https://www.accessdata.fda.gov/scripts/cdrh/cfdocs/cfMAUDE/Detail.CFM?MDRFOI__ID=18360961&pc=MTA	2023826-2023-05555		Malfunction	STAAR SURGICAL COMPANY	2023-12-19 05:00:00	MTA	IMPLANTABLE COLLAMER LENS (ICL)	Inadequacy of Device Shape and/or Size	Appropriate Clinical Signs, Symptoms, Conditions Term / Code Not Available	P030016	1	Event Description: THE REPORTER INDICATED THE SURGEON IMPLANTED A 12.6MM VICM5_12.6 IMPLANTABLE COLLAMER LENS, -09.50 DIOPTER, IN THE PATIENTS LEFT EYE (OS), ON (B)(6) 2023. THE LENS WAS REPORTED AS LOW VAULTING AND PATIENT EXPERIENCED A MILD DISCORIC PUPIL (MILD DILATED 5MM AND SLOWLY REACTIVE TO LIGHT). THE INTRAOCULAR PRESSURE HAS BEEN MEASURED WITHIN NORMAL LIMITS. THE LENS REMAINED IMPLANTED…
https://www.accessdata.fda.gov/scripts/cdrh/cfdocs/cfMAUDE/Detail.CFM?MDRFOI__ID=18472279&pc=MTA	2023826-2024-00116		Injury	STAAR SURGICAL COMPANY	2024-01-08 05:00:00	MTA	IMPLANTABLE COLLAMER LENS (ICL)	Inadequacy of Device Shape and/or Size	Appropriate Clinical Signs, Symptoms, Conditions Term / Code Not Available	P030016	1	Event Description: THE REPORTER INDICATED THAT A 12.6MM VICM5_12.6 IMPLANTABLE COLLAMER LENS OF -5.00 DIOPTER WAS IMPLANTED INTO THE PATIENT'S EYE ON (B)(6) 2023. ON (B)(6) 2023 THE LENS WAS EXPLANTED DUE TO EXCESSIVE VAULT WITH VERY SHALLOW ANGLES. A REPLACEMENT LENS WAS IMPLANTED. ADDITIONAL INFORMATION HAS BEEN REQUESTED BUT NONE HAS BEEN FORTHCOMING. IF ADDITIONAL INFORMATION IS RECEIVED A SU…
https://www.accessdata.fda.gov/scripts/cdrh/cfdocs/cfMAUDE/Detail.CFM?MDRFOI__ID=10905481&pc=MTA	2023826-2020-02730	2020-11-03 05:00:00	Injury	STAAR SURGICAL COMPANY	2020-11-25 05:00:00	MTA	IMPLANTABLE COLLAMER LENS (ICL)	Inadequacy of Device Shape and/or Size; Adverse Event Without Identified Device or Use Problem	Appropriate Clinical Signs, Symptoms, Conditions Term / Code Not Available	N/A	1	Event Description: THE REPORTER INDICATED THAT A 13.2MM, VICM5 13.2, -10.50 DIOPTER, IMPLANTABLE COLLAMER LENS WAS IMPLANTED INTO THE PATIENT'S RIGHT EYE (OD) ON (B)(6) 2020. SIGNIFICANT REDUCTION OF IRIDO-CORNEAL ANGELS WAS OBSERVED. ON (B)(6) 2020 THE LENS WAS REPOSITIONED AND THE PROBLEM WAS RESOLVED. LENS REMAINS IMPLANTED. Manufacturer Narrative: "EXCESSIVE VAULT AND NARROWING OF THE ANTERIO…
https://www.accessdata.fda.gov/scripts/cdrh/cfdocs/cfMAUDE/Detail.CFM?MDRFOI__ID=15142507&pc=MTA	2023826-2022-02572	2022-06-24 04:00:00	Malfunction	STAAR SURGICAL COMPANY	2022-08-01 04:00:00	MTA	IMPLANTABLE COLLAMER LENS (ICL)	Inadequacy of Device Shape and/or Size; Device Dislodged or Dislocated	Appropriate Clinical Signs, Symptoms, Conditions Term / Code Not Available	P030016	1	Event Description: THE REPORTER INDICATED THAT THE SURGEON IMPLANTED A 13.2MM VICM5_13.2; -10.0 DIOPTER IMPLANTABLE COLLAMER LENS INTO THE PATIENT'S LEFT EYE (OS) ON (B)(6) 2022. THE PATIENT EXPERIENCED CORNEAL EROSION (WHICH HEALED EXPECTEDLY AS THE SURGEON REPORTS); PATIENT COMPLAINS OF MULTIPLE IMAGES/REFLECTIONS/SHADOWS (MONOCULAR DIPLOPIA); LENS ROTATION AND LOW VAULTING. LENS REMAINS IMPLAN…
https://www.accessdata.fda.gov/scripts/cdrh/cfdocs/cfMAUDE/Detail.CFM?MDRFOI__ID=11573131&pc=MTA	2023826-2021-00766		Injury	STAAR SURGICAL COMPANY	2021-03-25	MTA	IMPLANTABLE COLLAMER LENS (ICL)	Inadequacy of Device Shape and/or Size; Device Dislodged or Dislocated	Appropriate Clinical Signs, Symptoms, Conditions Term / Code Not Available	P990013	1	Event Description: IT WAS REPORTED THAT A 13.2MM, IMPLANTABLE COLLAMER LENS WAS IMPLANTED INTO THE PATIENTS RIGHT EYE (OD) AND THE PATIENT EXPERIENCED OVER VAULT, NARROW ANGLE AND LENS ROTATION. IT WAS REPORTED THAT THE LENS WAS EXCHANGED AND NEW VAULT IS GOOD, PATIENT IS SEEING WELL AFTER EXCHANGE. ADDITIONAL INFORMATION HAS BEEN REQUESTED BUT NONE HAS BEEN FORTHCOMING. IF ADDITIONAL INFORMATION…
https://www.accessdata.fda.gov/scripts/cdrh/cfdocs/cfMAUDE/Detail.CFM?MDRFOI__ID=12808009&pc=MTA	2023826-2021-04322		Injury	STAAR SURGICAL COMPANY	2021-11-12 05:00:00	MTA	IMPLANTABLE COLLAMER LENS (ICL)	Inadequacy of Device Shape and/or Size; Device Dislodged or Dislocated	Appropriate Clinical Signs, Symptoms, Conditions Term / Code Not Available	NA	1	Event Description: THE REPORTER INDICATED THAT A 12.6MM, VICMO12.6, -16.00 DIOPTER, IMPLANTABLE COLLAMER LENS WAS IMPLANTED INTO THE PATIENTS RIGHT EYE (OD) ON (B)(6) 2021. EXCESSIVE VAUL, LENS ROTATION NOT ASSOCIATED TO LOW VAULT AND SIGNIFICANT REDUCTION OF ICA WAS OBSERVED. ON (B)(6) 2021 IT WAS REPORTED THAT THE LENS WAS REPOSITIONED BUT IT DID NOT RESOLVED THE PROBLEM. ON (B)(6) 2021 THE LEN…
https://www.accessdata.fda.gov/scripts/cdrh/cfdocs/cfMAUDE/Detail.CFM?MDRFOI__ID=13896064&pc=MTA	2023826-2022-00890		Injury	STAAR SURGICAL COMPANY AG	2022-03-24 04:00:00	MTA	IMPLANTABLE COLLAMER LENS (ICL)	Inadequacy of Device Shape and/or Size; No Apparent Adverse Event	Appropriate Clinical Signs, Symptoms, Conditions Term / Code Not Available	NA	1	Event Description: THE REPORTER INDICATED THE SURGEON IMPLANTED A 13.2MM VICM13.2 IMPLANTABLE COLLAMER LENS, -04.00 DIOPTER, IN THE PATIENTS RIGHT EYE (OD), ON (B)(6) 2011. THE PLAN IS TO EXPLANT THE LENS DUE TO PROGRESSIVE MYOPIA. THE LENS REMAINED IMPLANTED. ADDITIONAL INFORMATION HAS BEEN REQUESTED BUT NONE HAS BEEN FORTHCOMING. Manufacturer Narrative: B5: THE LENS WAS EXPLANTED ON (B)(6) 2022…
https://www.accessdata.fda.gov/scripts/cdrh/cfdocs/cfMAUDE/Detail.CFM?MDRFOI__ID=10577515&pc=MTA	2023826-2020-02193	2018-07-01 04:00:00	Injury	STAAR SURGICAL COMPANY	2020-09-23 04:00:00	MTA	IMPLANTABLE COLLAMER LENS (ICL)	Inadequacy of Device Shape and/or Size; Patient-Device Incompatibility	Appropriate Clinical Signs, Symptoms, Conditions Term / Code Not Available	NA	1	Event Description: THE REPORTER INDICATED THAT THE SURGEON IMPLANTED A 13.2MM VICMO13.2 IMPLANTABLE COLLAMER LENS, -5.5 DIOPTER INTO THE PATIENT'S LEFT EYE (OS) ON (B)(6) 2018. ON (B)(6) 2020 THE LENS WAS EXCHANGED WITH A SHORTER LENS DUE TO EXCESSIVE VAULT AND SIGNIFICANT REDUCTION OF IRIDO-CORNEAL ANGLES (ICA). THE PROBLEM WAS RESOLVED. THE CAUSE OF THE EVENT IS REPORTED AS A PATIENT-RELATED FA…
https://www.accessdata.fda.gov/scripts/cdrh/cfdocs/cfMAUDE/Detail.CFM?MDRFOI__ID=11697138&pc=MTA	2023826-2021-01094	2020-09-01 04:00:00	Injury	STAAR SURGICAL COMPANY	2021-04-20 04:00:00	MTA	IMPLANTABLE COLLAMER LENS (ICL)	Inadequacy of Device Shape and/or Size; Patient-Device Incompatibility	Appropriate Clinical Signs, Symptoms, Conditions Term / Code Not Available	N/A	1	Event Description: THE REPORTER INDICATED THE SURGEON IMPLANTED A 13.2MM VICMO13.2 IMPLANTABLE COLLAMER LENS, DIOPTER -7.0 INTO THE PATIENT'S RIGHT EYE (OD) ON (B)(6) 2020. ON (B)(6) 2020 THE LENS WAS EXPLANTED AND IN A SECOND SURGERY A SHORTER LENS WAS IMPLANTED DUE TO EXCESSIVE VAULT, SIGNIFICANT REDUCTION OF ENDOTHELIAL CELL COUNT/SIGNIFICANT ENDOTHELIAL CELL LOSS, AND THE CORNER OF THE EYE BE…
https://www.accessdata.fda.gov/scripts/cdrh/cfdocs/cfMAUDE/Detail.CFM?MDRFOI__ID=13459218&pc=MTA	2023826-2022-00379	2022-01-07 05:00:00	Injury	STAAR SURGICAL COMPANY	2022-02-04 05:00:00	MTA	IMPLANTABLE COLLAMER LENS (ICL)	Inadequacy of Device Shape and/or Size; Patient-Device Incompatibility	Appropriate Clinical Signs, Symptoms, Conditions Term / Code Not Available	P030016	1	Event Description: THE REPORTER INDICATED THAT THE SURGEON IMPLANTED A 13.2MM MICL13.2 IMPLANTABLE COLLAMER LENS, -11.5 DIOPTER INTO THE PATIENT'S RIGHT (OD) EYE ON (B)(6) 2021. THE SURGEON REPORTS VAULTING AND CORNEAL TOUCH. ATTEMPTS TO OBTAIN ADDITIONAL INFORMATION HAVE NOT BEEN SUCCESSFUL. Manufacturer Narrative: SEX, WEIGHT, RACE, ETHNICITY: UNK. DATE OF EVENT: UNK. (B)(4). CLAIM# (B)(4). Man…
https://www.accessdata.fda.gov/scripts/cdrh/cfdocs/cfMAUDE/Detail.CFM?MDRFOI__ID=13459239&pc=MTA	2023826-2022-00378	2022-01-07 05:00:00	Injury	STAAR SURGICAL COMPANY	2022-02-04 05:00:00	MTA	IMPLANTABLE COLLAMER LENS (ICL)	Inadequacy of Device Shape and/or Size; Patient-Device Incompatibility	Appropriate Clinical Signs, Symptoms, Conditions Term / Code Not Available	P030016	1	Event Description: THE REPORTER INDICATED THAT THE SURGEON IMPLANTED A 13.2MM MICL13.2 IMPLANTABLE COLLAMER LENS, -11.0 DIOPTER INTO THE PATIENT'S LEFT (OS) EYE ON (B)(6) 2021. THE SURGEON REPORTS VAULTING AND CORNEAL TOUCH. ATTEMPTS TO OBTAIN ADDITIONAL INFORMATION HAVE NOT BEEN SUCCESSFUL. Manufacturer Narrative: SEX, WEIGHT, RACE, ETHNICITY: UNK. DATE OF EVENT: UNK. (B)(4). CLAIM# (B)(4). Manu…
https://www.accessdata.fda.gov/scripts/cdrh/cfdocs/cfMAUDE/Detail.CFM?MDRFOI__ID=16413989&pc=MTA	2023826-2023-00605	2023-01-24 05:00:00	Injury	STAAR SURGICAL COMPANY	2023-02-21 05:00:00	MTA	IMPLANTABLE COLLAMER LENS (ICL)	Inadequacy of Device Shape and/or Size; Patient-Device Incompatibility	Appropriate Clinical Signs, Symptoms, Conditions Term / Code Not Available	P030016	1	Event Description: THE REPORTER INDICATED THAT A 12.6MM VICM5 12.6 IMPLANTABLE COLLAMER LENS OF -3.00 DIOPTER WAS IMPLANTED INTO THE PATIENT'S LEFT EYE (OS) ON (B)(6) 2023. EXCESSIVE VAULT, SIGNIFICANT REDUCTION OF IRIDO CORNEAL ANGLES. EYE 'ACHE' DUE TO CILIARY BODY COMPRESSION WAS OBSERVED. ON (B)(6) 2023 THE LENS WAS REMOVED AND ON THE SAME DAY DIFFERENT SURGERY A REPLACEMENT LENS OF SHORTER L…
https://www.accessdata.fda.gov/scripts/cdrh/cfdocs/cfMAUDE/Detail.CFM?MDRFOI__ID=14178237&pc=MTA	2023826-2022-01223	2022-03-21 04:00:00	Injury	STAAR SURGICAL COMPANY	2022-04-21 04:00:00	MTA	IMPLANTABLE COLLAMER LENS (ICL)	Inadequacy of Device Shape and/or Size; Unintended Movement	Appropriate Clinical Signs, Symptoms, Conditions Term / Code Not Available		1	Event Description: THE REPORTER INDICATED THAT A 13.2MM MICL 13.2 IMPLANTABLE COLLAMER LENS OF -16.0 DIOPTER WAS IMPLANTED INTO THE PATIENTS LEFT EYE (OS) ON (B)(6) 2022. ON (B)(4) 2022 THE LENS WAS REMOVED DUE TO LOW VAULT. UPON REMOVAL OF THE INITIAL LENS IT WAS DETERMINED TO FLIPPED INSIDE THE EYE. REPORTER STATES THERE WAS DIFFICULTY TUCKING HAPTICS UNDER THE IRIS AS THE MANIPULATOR CONSTANTL…
https://www.accessdata.fda.gov/scripts/cdrh/cfdocs/cfMAUDE/Detail.CFM?MDRFOI__ID=11478820&pc=MTA	2023826-2021-00634	2020-11-13 05:00:00	Injury	STAAR SURGICAL COMPANY	2021-03-14 05:00:00	MTA	IMPLANTABLE COLLAMER LENS (ICL)	Misfocusing	Appropriate Clinical Signs, Symptoms, Conditions Term / Code Not Available	P030016	1	Event Description: THE REPORTER INDICATED THE SURGEON IMPLANTED A 13.2MM MICL13.2 IMPLANTABLE COLLAMER LENS, -05.00 DIOPTER, IN THE PATIENTS LEFT EYE (OS) ON (B)(6) 2020. THE LENS WAS EXPLANTED ON (B)(6) 2021 DUE TO PATIENT EXPERIENCED A REFRACTIVE SURPRISE AND MONOCULAR DIPLOPIA (DOUBLE VISION). THE LENS WAS EXCHANGED FOR A TORIC ICL LENS AND THE PROBLEM WAS RESOLVED. THE CAUSE OF THE EVENT WAS …
https://www.accessdata.fda.gov/scripts/cdrh/cfdocs/cfMAUDE/Detail.CFM?MDRFOI__ID=11416102&pc=MTA	2023826-2021-00508	2021-02-10 05:00:00	Injury	STAAR SURGICAL COMPANY	2021-03-04 05:00:00	MTA	IMPLANTABLE COLLAMER LENS (ICL)	Misfocusing	Appropriate Clinical Signs, Symptoms, Conditions Term / Code Not Available	N/A	1	Event Description: THE REPORTER INDICATED THAT A 13.2MM, VICM6 13.2, -03.00 DIOPTER, IMPLANTABLE COLLAMER LENS WAS IMPLANTED INTO THE PATIENT'S RIGHT EYE (OD) ON (B)(6) 2020. PROBLEMS WITH DISTANCE UCVA POST 1 MONTH WAS OBSERVED. LENS REMAINS IMPLANTED. CAUSE OF THE EVENT IS REPORTED AS UNKNOWN, UCVA: 0.5, BCVA: 1.0 RX: 1.25/0.00/000". ADDITIONAL INFORMATION HAS BEEN REQUESTED BUT NONE HAS BEEN F…
https://www.accessdata.fda.gov/scripts/cdrh/cfdocs/cfMAUDE/Detail.CFM?MDRFOI__ID=11416142&pc=MTA	2023826-2021-00509	2021-02-10 05:00:00	Injury	STAAR SURGICAL COMPANY	2021-03-04 05:00:00	MTA	IMPLANTABLE COLLAMER LENS (ICL)	Misfocusing	Appropriate Clinical Signs, Symptoms, Conditions Term / Code Not Available	N/A	1	Event Description: THE REPORTER INDICATED THAT A 13.7MM, VICM6 13.7, -02.50 DIOPTER, IMPLANTABLE COLLAMER LENS WAS IMPLANTED INTO THE PATIENT'S LEFT EYE (OS) ON (B)(6) 2021. PROBLEMS WITH DISTANCE UCVA POST 1 MONTH WAS OBSERVED. LENS REMAINS IMPLANTED. CAUSE OF THE EVENT IS REPORTED AS UNKNOWN, UCVA: 0.5, BCVA: 1.0 RX: 1.25/0.00/000". ADDITIONAL INFORMATION HAS BEEN REQUESTED BUT NONE HAS BEEN FO…
https://www.accessdata.fda.gov/scripts/cdrh/cfdocs/cfMAUDE/Detail.CFM?MDRFOI__ID=15850227&pc=MTA	2023826-2022-04268	2021-09-03 04:00:00	Injury	STAAR SURGICAL COMPANY	2022-11-23 05:00:00	MTA	IMPLANTABLE COLLAMER LENS (ICL)	Misfocusing	Appropriate Clinical Signs, Symptoms, Conditions Term / Code Not Available	P030016	1	Event Description: THE REPORTER INDICATED THAT A 12.6MM VICMO 12.6 IMPLANTABLE COLLAMER LENS OF -8.5 DIOPTER WAS IMPLANTED INTO THE PATIENTS LEFT EYE (OS) ON (B)(6) 2021. REFRACTIVE SURPRISE WAS OBSERVED. "AFTER IMPLANTATION OF VICMO LENS, THE PATIENT COMPLAINED OF POOR VISION AND DOUBLE IMAGE, WHICH AFFECTED HIS LIFE. THE DOCTOR DECIDED TO CHANGE TO VTICMO LENS." ON (B)(6) 2022 THE LENS WAS EXCH…
https://www.accessdata.fda.gov/scripts/cdrh/cfdocs/cfMAUDE/Detail.CFM?MDRFOI__ID=16820442&pc=MTA	2023826-2023-01504	2022-06-18 04:00:00	Injury	STAAR SURGICAL COMPANY	2023-04-26 04:00:00	MTA	IMPLANTABLE COLLAMER LENS (ICL)	Misfocusing	Appropriate Clinical Signs, Symptoms, Conditions Term / Code Not Available	P030016	1	Event Description: THE REPORTER INDICATED THE SURGEON IMPLANTED A 12.6MM VICMO12.6 IMPLANTABLE COLLAMER LENS, -10.00 DIOPTER, IN THE PATIENTS RIGHT EYE (OD), ON (B)(6) 2022. THE LENS WAS EXPLANTED ON (B)(6) 2022 DUE TO THE PATIENT EXPERIENCED A REFRACTIVE SURPRISE AND REFRACTIVE CHANGE OVERTIME. THE LENS WAS REPLACED WITH A DIFFERENT MODEL (TORIC) BUT SAME LENGTH LENS AND THE PROBLEM WAS RESOLVED…
https://www.accessdata.fda.gov/scripts/cdrh/cfdocs/cfMAUDE/Detail.CFM?MDRFOI__ID=16301926&pc=MTA	2023826-2023-00388	2022-10-27 04:00:00	Injury	STAAR SURGICAL COMPANY	2023-02-04 05:00:00	MTA	IMPLANTABLE COLLAMER LENS (ICL)	Misfocusing	Appropriate Clinical Signs, Symptoms, Conditions Term / Code Not Available	P030016	1	Event Description: THE REPORTER INDICATED THAT A 13.2MM VICMO 13.2 IMPLANTABLE COLLAMER LENS OF -11.00 DIOPTER WAS IMPLANTED INTO THE PATIENT'S RIGHT EYE (OD) ON (B)(6) 2022. ON (B)(6) 2022 THE LENS WAS EXPLANTED DUE TO REFRACTIVE SURPRISE. REPORTEDLY THE PROBLEM WAS RESOLVED. CAUSE REPORTED AS UNKNOWN. Manufacturer Narrative: H3 - DEVICE EVALUATION: THE LENS WAS RETURNED DRY IN A MICROCENTRIFUGE…
https://www.accessdata.fda.gov/scripts/cdrh/cfdocs/cfMAUDE/Detail.CFM?MDRFOI__ID=15955610&pc=MTA	2023826-2022-04522	2022-11-23 05:00:00	Malfunction	STAAR SURGICAL COMPANY	2022-12-09 05:00:00	MTA	IMPLANTABLE COLLAMER LENS (ICL)	Misfocusing	Appropriate Clinical Signs, Symptoms, Conditions Term / Code Not Available	P030016	1	Event Description: THE REPORTER INDICATED THAT THE SURGEON IMPLANTED A 13.2MM VICM5_13.2; -10.50 DIOPTER IMPLANTABLE COLLAMER LENS INTO THE PATIENT'S LEFT EYE (OS) ON (B)(6) 2022. IT WAS REPORTED THAT THE PATIENT HAS "WRONG REFRACTION" (OVER CORRECTION). LENS REMAINS IMPLANTED. THE CAUSE OF THE EVENT WAS REPORTED AS USER ERROR AND NOTED THE DEVICE FAILED TO PERFORM AS INTENDED; "WRONG INITIAL REF…
https://www.accessdata.fda.gov/scripts/cdrh/cfdocs/cfMAUDE/Detail.CFM?MDRFOI__ID=17785989&pc=MTA	2023826-2023-04118		Injury	STAAR SURGICAL COMPANY	2023-09-20 04:00:00	MTA	IMPLANTABLE COLLAMER LENS (ICL)	Misfocusing	Appropriate Clinical Signs, Symptoms, Conditions Term / Code Not Available	P030016	1	Event Description: A CASE REPORT WAS PUBLISHED IN FRONTIERS IN MEDICINE ON (B)(6) 2023. TITLED " CASE REPORT: SPONTANEOUS LENS ABSORPTION AFTER IMPLANTATION OF AN IMPLANTABLE COLLAMER LENS." AN IMPLANTABLE COLLAMER LENS OF UNKNOWN MODEL AND SIZE WAS IMPLANTED INTO THE PATIENT'S LEFT EYE (OS) IN 2016. A 23-YEAR OLD PATIENT COMPLAINED OF GRADUAL LOSS OF VISION IN THE LEFT EYE (OS). OBSERVATION ON M…
https://www.accessdata.fda.gov/scripts/cdrh/cfdocs/cfMAUDE/Detail.CFM?MDRFOI__ID=13015001&pc=MTA	2023826-2021-04903		Malfunction	STAAR SURGICAL COMPANY	2021-12-15 05:00:00	MTA	IMPLANTABLE COLLAMER LENS (ICL)	Misfocusing; Adverse Event Without Identified Device or Use Problem	Appropriate Clinical Signs, Symptoms, Conditions Term / Code Not Available		1	Event Description: THE REPORTER INDICATED THAT THE SURGEON IMPLANTED AN IMPLANTABLE COLLAMER LENS INTO THE PATIENT'S EYE. ON (B)(6) 2021. THE PATIENT EXPERIENCED EXTREME MYOPIA AND MIOSTAT WAS USED. LENS REMAINS IMPLANTED. ATTEMPTS TO OBTAIN ADDITIONAL INFORMATION HAVE NOT BEEN SUCCESSFUL. IF ADDITIONAL INFORMATION IS RECEIVED A SUPPLEMENTAL MEDWATCH REPORT WILL BE SUBMITTED. Manufacturer Narrati…
https://www.accessdata.fda.gov/scripts/cdrh/cfdocs/cfMAUDE/Detail.CFM?MDRFOI__ID=13015005&pc=MTA	2023826-2021-04902		Malfunction	STAAR SURGICAL COMPANY	2021-12-15 05:00:00	MTA	IMPLANTABLE COLLAMER LENS (ICL)	Misfocusing; Adverse Event Without Identified Device or Use Problem	Appropriate Clinical Signs, Symptoms, Conditions Term / Code Not Available		1	Event Description: THE REPORTER INDICATED THAT THE SURGEON IMPLANTED AN IMPLANTABLE COLLAMER LENS INTO THE PATIENT'S EYE. ON (B)(6) 2021. THE PATIENT EXPERIENCED EXTREME MYOPIA AND MIOSTAT WAS USED. LENS REMAINS IMPLANTED. ATTEMPTS TO OBTAIN ADDITIONAL INFORMATION HAVE NOT BEEN SUCCESSFUL. IF ADDITIONAL INFORMATION IS RECEIVED A SUPPLEMENTAL MEDWATCH REPORT WILL BE SUBMITTED.Event Description: TH…
https://www.accessdata.fda.gov/scripts/cdrh/cfdocs/cfMAUDE/Detail.CFM?MDRFOI__ID=11091320&pc=MTA	2023826-2020-03223	2020-11-27 05:00:00	Injury	STAAR SURGICAL COMPANY	2020-12-29 05:00:00	MTA	IMPLANTABLE COLLAMER LENS (ICL)	Misfocusing; Inadequacy of Device Shape and/or Size	Appropriate Clinical Signs, Symptoms, Conditions Term / Code Not Available	NA#S-P#NA	1	Event Description: THE REPORTER INDICATED THE SURGEON IMPLANTED A 13.2MM VICM5_13.2 IMPLANTABLE COLLAMER LENS, -13.50 DIOPTER IN THE PATIENTS LEFT EYE (OS) ON (B)(6) 2020. THE LENS WAS EXPLANTED ON (B)(6) 2020 DUE TO EXCESSIVE VAULTING (THE LENS VAULTED FORWARD), AND ANGLE CLOSURE. THE PATIENT EXPERIENCED A REFRACTIVE SURPRISE. THE LENS WAS EXCHANGED FOR A SHORTER LENS. THE CAUSE OF THE EVENT WAS…
https://www.accessdata.fda.gov/scripts/cdrh/cfdocs/cfMAUDE/Detail.CFM?MDRFOI__ID=14458457&pc=MTA	2023826-2022-01625		Malfunction	STAAR SURGICAL COMPANY	2022-05-20 04:00:00	MTA	IMPLANTABLE COLLAMER LENS (ICL)	Misfocusing; Inadequacy of Device Shape and/or Size	Appropriate Clinical Signs, Symptoms, Conditions Term / Code Not Available		1	Event Description: THE REPORTER INDICATED THAT AN IMPLANTABLE COLLAMER LENS OF UNKNOWN SIZE AND MODEL WAS IMPLANTED INTO THE PATIENTS RIGHT EYE (OD). PATIENT EXPERIENCED A LARGE VAULT AND WAS QUITE HYPEROPIC. IF ADDITIONAL INFORMATION IS RECEIVED A SUPPLEMENTAL MEDWATCH REPORT WILL BE SUBMITTED. Manufacturer Narrative: CORRECTED DATA: B5- THE PATIENT ALSO EXPERIENCED REFRACTIVE SURPRISE. CLAIM# (…
https://www.accessdata.fda.gov/scripts/cdrh/cfdocs/cfMAUDE/Detail.CFM?MDRFOI__ID=14458485&pc=MTA	2023826-2022-01626		Malfunction	STAAR SURGICAL COMPANY	2022-05-20 04:00:00	MTA	IMPLANTABLE COLLAMER LENS (ICL)	Misfocusing; Inadequacy of Device Shape and/or Size	Appropriate Clinical Signs, Symptoms, Conditions Term / Code Not Available		1	Event Description: THE REPORTER INDICATED THAT AN IMPLANTABLE COLLAMER LENS OF UNKNOWN SIZE AND MODEL WAS IMPLANTED INTO THE PATIENTS LEFT EYE (OS). PATIENT EXPERIENCED A LARGE VAULT AND WAS QUITE HYPEROPIC. IF ADDITIONAL INFORMATION IS RECEIVED A SUPPLEMENTAL MEDWATCH REPORT WILL BE SUBMITTED. Manufacturer Narrative: CLAIM#: (B)(4). Manufacturer Narrative: CORRECTED DATA: B5- THE PATIENT ALSO EX…
https://www.accessdata.fda.gov/scripts/cdrh/cfdocs/cfMAUDE/Detail.CFM?MDRFOI__ID=17878138&pc=MTA	2023826-2023-04427		Malfunction	STAAR SURGICAL COMPANY	2023-10-05 04:00:00	MTA	IMPLANTABLE COLLAMER LENS (ICL)	Misfocusing; Off-Label Use; Device Dislodged or Dislocated	Appropriate Clinical Signs, Symptoms, Conditions Term / Code Not Available	P030016	1	Event Description: AN ARTICLE PUBLISHED TITLED "EFFECT OF LONG-TERM ROTATION ON ASTIGMATISM FOLLOWING EVO-TORIC INTRAOCULAR COLLAMER LENS IMPLANTATION" INDICATED THAT OUT OF 40 EYES OF 22 PATIENTS IT NOTES THREE YEARS POSTOPERATIVELY THREE EYES HAD LENS ROTATION AND SLIGHTLY SMALLER ICL SIZE MIGHT HAVE CAUSED THE SIGNIFICANT ROTATION. IT ADDITIONALLY NOTES THE ASTIGMATISM OF THREE EYES HAD EXPERI…
https://www.accessdata.fda.gov/scripts/cdrh/cfdocs/cfMAUDE/Detail.CFM?MDRFOI__ID=17558373&pc=MTA	2023826-2023-03544		Injury	STAAR SURGICAL COMPANY	2023-08-16 04:00:00	MTA	IMPLANTABLE COLLAMER LENS (ICL)	Misfocusing; Off-Label Use; Inadequacy of Device Shape and/or Size; Patient-Device Incompatibility	Appropriate Clinical Signs, Symptoms, Conditions Term / Code Not Available	P030016	1	Event Description: AN ARTICLE WAS PUBLISHED IN THE AMERICAN JOURNAL OF CASE REPORTS TITLED, 'PRESUMED INDICATED IMPLANTATION OF POSTERIOR CHAMBER PHAKIC INTRAOCULAR LENS'. THE ARTICLE REPORTS " A 23-YEAR-OLD WOMAN WAS REFERRED FOR POOR VISION FOLLOWING AN IMPLANTATION OF BILATERAL TORIC IMPLANTABLE COLLAMER LENS (ICL) IMPLANTATION WHEN SHE WAS 18 YEARS OLD FOR HIGH MYOPIC ASTIGMATISM AND ANISOMET…
https://www.accessdata.fda.gov/scripts/cdrh/cfdocs/cfMAUDE/Detail.CFM?MDRFOI__ID=15442548&pc=MTA	2023826-2022-03180	2022-09-07 04:00:00	Injury	STAAR SURGICAL COMPANY	2022-09-16 04:00:00	MTA	IMPLANTABLE COLLAMER LENS (ICL)	Misfocusing; Patient-Device Incompatibility	Appropriate Clinical Signs, Symptoms, Conditions Term / Code Not Available	P030016	1	Event Description: THE REPORTER INDICATED THAT THE SURGEON IMPLANTED A 12.6MM VICMO12.6; -15.00 DIOPTER IMPLANTABLE COLLAMER LENS INTO THE PATIENT'S RIGHT EYE (OD) ON (B)(6) 2022. THE PATIENT WAS UNHAPPY ABOUT HER PERIPHERAL VISION AND WAS NAUSEOUS AND VOMITING FOR A MONTH. THE LENS WAS EXPLANTED ON (B)(6) 2022 AND THIS RESOLVED THE PROBLEM. THE CAUSE OF THE EVENT WAS REPORTED AS A PATIENT RELATE…
https://www.accessdata.fda.gov/scripts/cdrh/cfdocs/cfMAUDE/Detail.CFM?MDRFOI__ID=15442549&pc=MTA	2023826-2022-03181	2022-09-07 04:00:00	Injury	STAAR SURGICAL COMPANY	2022-09-16 04:00:00	MTA	IMPLANTABLE COLLAMER LENS (ICL)	Misfocusing; Patient-Device Incompatibility	Appropriate Clinical Signs, Symptoms, Conditions Term / Code Not Available	P030016	1	Event Description: THE REPORTER INDICATED THAT THE SURGEON IMPLANTED A 12.6MM VICMO12.6; -15.00 DIOPTER IMPLANTABLE COLLAMER LENS INTO THE PATIENT'S RIGHT LEFT (OS) ON (B)(6) 2022. THE PATIENT WAS UNHAPPY ABOUT HER PERIPHERAL VISION AND WAS NAUSEOUS AND VOMITING FOR A MONTH. THE LENS WAS EXPLANTED ON (B)(6) 2022 AND THIS RESOLVED THE PROBLEM. THE CAUSE OF THE EVENT WAS REPORTED AS A PATIENT RELAT…
https://www.accessdata.fda.gov/scripts/cdrh/cfdocs/cfMAUDE/Detail.CFM?MDRFOI__ID=15784668&pc=MTA	2023826-2022-04079	2018-03-27 04:00:00	Injury	STAAR SURGICAL COMPANY	2022-11-11 05:00:00	MTA	IMPLANTABLE COLLAMER LENS (ICL)	No Apparent Adverse Event	Appropriate Clinical Signs, Symptoms, Conditions Term / Code Not Available	P030016	1	Event Description: THE REPORTER INDICATED THE SURGEON IMPLANTED A 12.6MM MICL12.6 IMPLANTABLE COLLAMER LENS, -06.00 DIOPTER, IN THE PATIENTS RIGHT EYE (OD) ON (B)(6) 2018. THE LENS WAS REPORTED AS REFRACTIVE CHANGE OVERTIME AND REMAINED IMPLANTED. ADDITIONAL INFORMATION HAS BEEN REQUESTED BUT NONE HAS BEEN FORTHCOMING. Manufacturer Narrative: B5: THE LENS WAS REMOVED AND REPLACED ON (B)(6) 2022, …
https://www.accessdata.fda.gov/scripts/cdrh/cfdocs/cfMAUDE/Detail.CFM?MDRFOI__ID=12443631&pc=MTA	2023826-2021-03484	2021-01-01	Malfunction	STAAR SURGICAL COMPANY AG	2021-09-08	MTA	IMPLANTABLE COLLAMER LENS (ICL)	No Apparent Adverse Event	Appropriate Clinical Signs, Symptoms, Conditions Term / Code Not Available	NA	1	Event Description: THE REPORTER INDICATED THE SURGEON IMPLANTED A 12.6MM VICMO12.6 IMPLANTABLE COLLAMER LENS, -04.50 DIOPTER, INTO THE PATIENTS RIGHT EYE (OD) ON (B)(6) 2013. A REFRACTIVE CHANGE OVERTIME WAS NOTED AND THE LENS REMAINS IMPLANTED. THE CAUSE OF THE EVERNT WAS DUE TO PATIENT RELATED FACTOR. ADDITIONAL INFORMATION HAS BEEN REQUESTED BUT NONE HAS BEEN FORTHCOMING. Manufacturer Narrativ…
https://www.accessdata.fda.gov/scripts/cdrh/cfdocs/cfMAUDE/Detail.CFM?MDRFOI__ID=12308430&pc=MTA	2023826-2021-03076	2021-04-01	Malfunction	STAAR SURGICAL COMPANY	2021-08-11	MTA	IMPLANTABLE COLLAMER LENS (ICL)	No Apparent Adverse Event	Appropriate Clinical Signs, Symptoms, Conditions Term / Code Not Available	N/A	1	Event Description: THE REPORTER INDICATED THAT A 13.2MM, VICM5_13.2, -10.00 DIOPTER, IMPLANTABLE COLLAMER LENS WAS IMPLANTED INTO THE PATIENT'S LEFT EYE (OS) ON (B)(6) 2020. SIGNIFICANT REDUCTION OF IRIDO-CORNEAL ANGLES WAS OBSERVED. LENS REMAINS IMPLANTED. REPORTEDLY, ANGLES NARROW, WILL CONTINUE TO OBSERVE. PER THE REPORTER ON (B)(6) 2021, NO TREATMENT OR INTERVENTION HAS BEEN DECIDED. ADDITION…
https://www.accessdata.fda.gov/scripts/cdrh/cfdocs/cfMAUDE/Detail.CFM?MDRFOI__ID=13182561&pc=MTA	2023826-2022-00034	2021-12-17 05:00:00	Injury	STAAR SURGICAL COMPANY	2022-01-06 05:00:00	MTA	IMPLANTABLE COLLAMER LENS	No Apparent Adverse Event	Appropriate Clinical Signs, Symptoms, Conditions Term / Code Not Available	N/A	1	Event Description: THE REPORTER STATED THAT THE SURGEON IMPLANTED AN IMPLANTABLE COLLAMER LENS INTO THE PATIENT'S EYE. THE SURGEON REPORTS SPONTANEOUS MYDRIASIS SOME DAYS AFTER SURGERY. ATTEMPTS TO OBTAIN ADDITIONAL INFORMATION HAVE NOT BEEN SUCCESSFUL.Event Description: THE REPORTER STATED THAT THE SURGEON IMPLANTED AN IMPLANTABLE COLLAMER LENS INTO THE PATIENT'S EYE. THE SURGEON REPORTS SPONTAN…
https://www.accessdata.fda.gov/scripts/cdrh/cfdocs/cfMAUDE/Detail.CFM?MDRFOI__ID=14059267&pc=MTA	2023826-2022-01027	2022-01-18 05:00:00	Injury	STAAR SURGICAL COMPANY	2022-04-08 04:00:00	MTA	IMPLANTABLE COLLAMER LENS (ICL)	No Apparent Adverse Event	Appropriate Clinical Signs, Symptoms, Conditions Term / Code Not Available		1	Event Description: THE REPORTER INDICATED THAT THE SURGEON IMPLANTED A 12.6MM VICM5_12.6; -9.00 DIOPTER IMPLANTABLE COLLAMER LENS INTO THE PATIENT'S RIGHT EYE (OD) ON (B)(6) 2022 AS A REPLACEMENT LENS TO A PREVIOUS REFRACTIVE SURPRISE. IT WAS INDICATED THIS DID NOT RESOLVE THE PROBLEM, AND THE SURGEON REPORTS "VAULT CORRECT. HYPEROPIA REMAINS". LENS REMAINS IMPLANTED. SEE MFR# 2023826-2022-01026 …
https://www.accessdata.fda.gov/scripts/cdrh/cfdocs/cfMAUDE/Detail.CFM?MDRFOI__ID=15294323&pc=MTA	2023826-2022-02807	2022-02-22 05:00:00	Malfunction	STAAR SURGICAL COMPANY	2022-08-25 04:00:00	MTA	IMPLANTABLE COLLAMER LENS (ICL)	No Apparent Adverse Event	Appropriate Clinical Signs, Symptoms, Conditions Term / Code Not Available	P030016	1	Event Description: THE REPORTER INDICATED THAT A 13.7MM VICM5 13.7 OF -9.0 DIOPTER IMPLANTABLE COLLAMER LENS HAD LINEAR STAINS ON THE LENS. THE LENS WAS NOT IMPLANTED INTO THE PATIENTS LEFT EYE (OS). A REPLACEMENT LENS OF THE SAME MODEL/SIZE AND DIOPTER WAS IMPLANTED AND THE PROBLEM WAS RESOLVED. CAUSE REPORTED AS UNKNOWN. Manufacturer Narrative: LENS WORK ORDER SEARCH- NO SIMILAR COMPLAINT EVENT…
https://www.accessdata.fda.gov/scripts/cdrh/cfdocs/cfMAUDE/Detail.CFM?MDRFOI__ID=15294350&pc=MTA	2023826-2022-02806	2022-02-22 05:00:00	Malfunction	STAAR SURGICAL COMPANY	2022-08-25 04:00:00	MTA	IMPLANTABLE COLLAMER LENS (ICL)	No Apparent Adverse Event	Appropriate Clinical Signs, Symptoms, Conditions Term / Code Not Available	P030016	1	Event Description: THE REPORTER INDICATED THAT A 13.7MM VICM5 13.7 OF -10.50 DIOPTER IMPLANTABLE COLLAMER LENS HAD LINEAR STAINS ON THE LENS. THE LENS WAS NOT IMPLANTED INTO THE PATIENTS RIGHT EYE (OD). A REPLACEMENT LENS OF THE SAME MODEL/SIZE AND DIOPTER WAS IMPLANTED AND THE PROBLEM WAS RESOLVED. CAUSE REPORTED AS UNKNOWN. Manufacturer Narrative: INVESTIGATION TYPE: LENS WORK ORDER SEARCH- NO …
https://www.accessdata.fda.gov/scripts/cdrh/cfdocs/cfMAUDE/Detail.CFM?MDRFOI__ID=14750793&pc=MTA	2023826-2022-01925	2022-05-20 04:00:00	Malfunction	STAAR SURGICAL COMPANY	2022-06-20 04:00:00	MTA	IMPLANTABLE COLLAMER LENS (ICL)	No Apparent Adverse Event	Appropriate Clinical Signs, Symptoms, Conditions Term / Code Not Available	P030016	1	Event Description: THE REPORTER INDICATED THAT A 12.6MM VICM5 12.6 IMPLANTABLE COLLAMER LENS OF -7.00 DIOPTER WAS IMPLANTED INTO THE PATIENTS RIGHT EYE (OD) ON (B)(6) 2022. FOREIGN MATERIAL CONTAMINATION (PLASTIC PIECES) WERE OBSERVED. THE PLASTIC PIECES WERE REMOVED FROM INSIDE THE EYE AND THE PROBLEM WAS RESOLVED. CAUSE REPORTED AS UNKNOWN. Manufacturer Narrative: H6-DEVICE EVALUATION: A MICROC…
https://www.accessdata.fda.gov/scripts/cdrh/cfdocs/cfMAUDE/Detail.CFM?MDRFOI__ID=15584542&pc=MTA	2023826-2022-03619	2022-09-18 04:00:00	Malfunction	STAAR SURGICAL COMPANY	2022-10-11 04:00:00	MTA	IMPLANTABLE COLLAMER LENS (ICL)	No Apparent Adverse Event	Appropriate Clinical Signs, Symptoms, Conditions Term / Code Not Available	P030016	1	Event Description: THE REPORTER INDICATED THAT THE SURGEON IMPLANTED A 13.2MM VICMO13.2; -6.0 DIOPTER IMPLANTABLE COLLAMER LENS INTO THE PATIENT'S LEFT EYE (OS) ON (B)(6) 2022. THE SURGEON REPORTS THERE WAS FOREIGN MATTER ON THE ICL PERI-OPTICAL HOLE OF THE LENS AND FILAMENTOUS FOREIGN BODY IN THE VIAL. IT WAS INDICATED THE LENS REMAINS IMPLANTED AND THE PROBLEM IS RESOLVED. Manufacturer Narrativ…
https://www.accessdata.fda.gov/scripts/cdrh/cfdocs/cfMAUDE/Detail.CFM?MDRFOI__ID=15781982&pc=MTA	2023826-2022-04000	2022-10-01 04:00:00	Malfunction	STAAR SURGICAL COMPANY	2022-11-11 05:00:00	MTA	IMPLANTABLE COLLAMER LENS (ICL)	No Apparent Adverse Event	Appropriate Clinical Signs, Symptoms, Conditions Term / Code Not Available	P030016	1	Event Description: THE REPORTER INDICATED THAT A 12.1MM VICMO 12.1 IMPLANTABLE COLLAMER LENS OF -9.5 DIOPTER WAS IMPLANTED INTO THE PATIENTS LEFT EYE (OS) ON (B)(6)2022 . DOCTOR FOUND THERE WERE FLOCCULENT FLOATING OBJECTS ON THE SURFACE OF THE LENS DURING THE SURGERY. AT FOLLOW UP CHECK UPS THE FOREIGN BODY WAS STILL THERE. SINCE THE PATIENT IS IN NORMAL CONDITION, THE DOCTOR DECIDED NOT TO REPL…
https://www.accessdata.fda.gov/scripts/cdrh/cfdocs/cfMAUDE/Detail.CFM?MDRFOI__ID=17669074&pc=MTA	2023826-2023-03742	2023-07-26 04:00:00	Injury	STAAR SURGICAL COMPANY	2023-09-01 04:00:00	MTA	IMPLANTABLE COLLAMER LENS (ICL)	No Apparent Adverse Event	Appropriate Clinical Signs, Symptoms, Conditions Term / Code Not Available	P030016	1	Event Description: THE REPORTER INDICATED THAT THE SURGEON IMPLANTED A 13.2MM VICMO13.2, -18.0 DIOPTER, IMPLANTABLE COLLAMER LENS INTO THE PATIENT'S RIGHT EYE (OD) ON (B)(6) 2023. THE LENS TORE DURING INJECTION/DELIVERY INTO THE EYE. THERE WAS PATIENT CONTACT (LENS TOUCHED THE EYE) WITH NO PATIENT INJURY. THE LENS WAS EXCHANGED ON (B)(6) 2023. THIS RESOLVED THE PROBLEM. CAUSE OF THE EVENT IS REPO…
https://www.accessdata.fda.gov/scripts/cdrh/cfdocs/cfMAUDE/Detail.CFM?MDRFOI__ID=17885023&pc=MTA	2023826-2023-04311	2023-08-28 04:00:00	Injury	STAAR SURGICAL COMPANY	2023-10-06 04:00:00	MTA	IMPLANTABLE COLLAMER LENS (ICL)	No Apparent Adverse Event	Appropriate Clinical Signs, Symptoms, Conditions Term / Code Not Available	P030016	1	Event Description: THE REPORTER INDICATED THE SURGEON IMPLANTED A 12.6MM VICM5_12.6 IMPLANTABLE COLLAMER LENS, -11.50 DIOPTER, INTO THE PATIENTS LEFT EYE (OS) ON (B)(6) 2023. THE PATIENT EXPERIENCED PIGMENT DISPERSION AND DILATED PUPIL (NON REACTIVE). THE LENS REMAINED IMPLANTED. CAUSE OF THE EVENT WAS UNKNOWN. ADDITIONAL INFORMATION HAS BEEN REQUESTED BUT NONE HAS BEEN FORTHCOMING. Manufacturer …
https://www.accessdata.fda.gov/scripts/cdrh/cfdocs/cfMAUDE/Detail.CFM?MDRFOI__ID=13057149&pc=MTA	2023826-2021-04908		Malfunction	STAAR SURGICAL COMPANY	2021-12-21 05:00:00	MTA	IMPLANTABLE COLLAMER LENS (ICL)	No Apparent Adverse Event	Appropriate Clinical Signs, Symptoms, Conditions Term / Code Not Available	P030016	1	Event Description: THE PATIENT REPORTED HAD AN ICL IMPLANTABLE COLLAMER LENS IMPLANTED IN 2008. THE PATIENT REPORTED HAS NOW BEEN EXPERIENCING VISION LOSS. ADDITIONAL INFORMATION HAS BEEN REQUESTED BUT NONE HAS BEEN FORTHCOMING. Manufacturer Narrative: AGE: UNK. WEIGHT: UNK. RACE: UNK. ETHNICITY: UNK. DATE OF EVENT: UNK. EXPIRATION DATE: UNK. EXPLANT DATE: UNK. INITIAL REPORTER OCCUPATION: UNK. D…
https://www.accessdata.fda.gov/scripts/cdrh/cfdocs/cfMAUDE/Detail.CFM?MDRFOI__ID=13082674&pc=MTA	2023826-2021-04923		Malfunction	STAAR SURGICAL COMPANY	2021-12-23 05:00:00	MTA	IMPLANTABLE COLLAMER LENS (ICL)	No Apparent Adverse Event	Appropriate Clinical Signs, Symptoms, Conditions Term / Code Not Available	NA	1	Event Description: THE REPORTER INDICATED THE SURGEON IMPLANTED A 12.6MM IMPLANTABLE COLLAMER LENS INTO THE PATIENTS EYE. THE LENS WAS REPORTED AS HAVING NARROW ANGLES AND REMAINED IMPLANTED. THE REPORTER INDICATED THE EYE IS NOW FINE AND NO EXCHANGE IS NEEDED. ADDITIONAL INFORMATION HAS BEEN REQUESTED BUT NONE HAS BEEN FORTHCOMING.Event Description: THE REPORTER INDICATED THE SURGEON IMPLANTED A…
https://www.accessdata.fda.gov/scripts/cdrh/cfdocs/cfMAUDE/Detail.CFM?MDRFOI__ID=13538837&pc=MTA	2023826-2022-00526		Malfunction	STAAR SURGICAL COMPANY	2022-02-15 05:00:00	MTA	IMPLANTABLE COLLAMER LENS (ICL)	No Apparent Adverse Event	Appropriate Clinical Signs, Symptoms, Conditions Term / Code Not Available		1	Event Description: THE REPORTER INDICATED THAT THE SURGEON IMPLANTED A 12.6MM VICMO12.6; -15.5 DIOPTER IMPLANTABLE COLLAMER LENS INTO THE PATIENT'S LEFT EYE (OS) ON (B)(6) 2021; AS A REPLACEMENT LENS TO A PREVIOUS LENS TEAR/BREAK DURING LOADING ISSUE. IT WAS INDICATED THAT THE PATIENT IS UNHAPPY WITH THE POSTOPERATIVE RESULTS AND UCVA IS 20/50. LENS REMAINS IMPLANTED. ATTEMPTS TO OBTAIN ADDITIONA…
https://www.accessdata.fda.gov/scripts/cdrh/cfdocs/cfMAUDE/Detail.CFM?MDRFOI__ID=13552666&pc=MTA	2023826-2022-00428		Malfunction	STAAR SURGICAL COMPANY	2022-02-17 05:00:00	MTA	IMPLANTABLE COLLAMER LENS (ICL)	No Apparent Adverse Event	Appropriate Clinical Signs, Symptoms, Conditions Term / Code Not Available	P030016	1	Event Description: THE REPORTER INDICATED THE SURGEON IMPLANTED AN ICL IMPLANTABLE COLLAMER LENS IN A PATIENT. THE REPORTER INDICATED THE PATIENT IS SEEING A "LINE OF LIGHT" POST PIS FOR ICL SURGERY. THE LENS REMAINS IMPLANTED. ADDITIONAL INFORMATION HAS BEEN REQUESTED BUT NONE HAS BEEN FORTHCOMING.Event Description: THE REPORTER INDICATED THE SURGEON IMPLANTED AN ICL IMPLANTABLE COLLAMER LENS IN…
https://www.accessdata.fda.gov/scripts/cdrh/cfdocs/cfMAUDE/Detail.CFM?MDRFOI__ID=13726557&pc=MTA	2023826-2022-00759		Malfunction	STAAR SURGICAL COMPANY	2022-03-10 05:00:00	MTA	IMPLANTABLE COLLAMER LENS (ICL)	No Apparent Adverse Event	Appropriate Clinical Signs, Symptoms, Conditions Term / Code Not Available	NA	1	Event Description: THE REPORTER INDICATED THE SURGEON IMPLANTED EVO VIVA LENSES INTO 14 EYES. THE SURGEON REPORTED 28.6% OF THE EYES (TOTAL OF 4 EYES) LOST 2 OR MORE LINES OF BEST CORRECTED VISION (BCVA) AT 3 MONTHS POST-OP. ADDITIONAL INFORMATION HAS BEEN REQUESTED BUT NONE HAS BEEN FORTHCOMING. Manufacturer Narrative: B5: THE REPORTER INDICATED THE SURGEON IMPLANTED EVO VIVA LENSES INTO 14 EYES…
https://www.accessdata.fda.gov/scripts/cdrh/cfdocs/cfMAUDE/Detail.CFM?MDRFOI__ID=14598569&pc=MTA	2023826-2022-01741		Malfunction	STAAR SURGICAL COMPANY	2022-06-03 04:00:00	MTA	IMPLANTABLE COLLAMER LENS (ICL)	No Apparent Adverse Event	Appropriate Clinical Signs, Symptoms, Conditions Term / Code Not Available	P030016	1	Event Description: A VICMO/5 LENS WAS RETURNED DAMAGE. Manufacturer Narrative: PATIENT ID, AGE OR DOB, SEX, WEIGHT, ETHNICITY, RACE: UNK. DATE OF EVENT: UNK. IMPLANT/EXPLANT DATE: UNK. DEVICE EVALUATION: THE LENS WAS RETURNED DRY IN A MICROCENTRIFUGE VIAL WITH DEBRIS ON THE LENS. VISUAL INSPECTION FOUND HAPTIC BENT WITH DEBRIS THROUGHOUT THE LENS. CLAIM#: (B)(4).
https://www.accessdata.fda.gov/scripts/cdrh/cfdocs/cfMAUDE/Detail.CFM?MDRFOI__ID=14734242&pc=MTA	2023826-2022-01853		Malfunction	STAAR SURGICAL COMPANY	2022-06-17 04:00:00	MTA	IMPLANTABLE COLLAMER LENS (ICL)	No Apparent Adverse Event	Appropriate Clinical Signs, Symptoms, Conditions Term / Code Not Available	P030016	1	Event Description: THE REPORTER INDICATED THE SURGEON IMPLANTED A 13.2MM VICM13.2 IMPLANTABLE COLLAMER LENS, -03.00 DIIOPTER, IN THE PATIENTS LEFT EYE (OS), ON (B)(6) 2012. THE REPORTER INDICATED THE LENS WILL BE EXPLANTED/EXCHANGED DUE TO PROGRESSIVE MYOPIA AND ASTIGMATISM. THE LENS REMAINED IMPLANTED. ADDITIONAL INFORMATION HAS BEEN REQUESTED BUT NONE HAS BEEN FORTHCOMING. Manufacturer Narrativ…
https://www.accessdata.fda.gov/scripts/cdrh/cfdocs/cfMAUDE/Detail.CFM?MDRFOI__ID=15129629&pc=MTA	2023826-2022-02449		Injury	STAAR SURGICAL COMPANY	2022-07-29 04:00:00	MTA	IMPLANTABLE COLLAMER LENS (ICL)	No Apparent Adverse Event	Appropriate Clinical Signs, Symptoms, Conditions Term / Code Not Available	P030016	1	Event Description: THE REPORTER REPORTED A 13.2MM VICMO13.2 -15.00 DIOPTER IMPLANTABLE COLLAMER LENS. THE REPORTER STATED "DEFECTIVE OPTIC, USED BACKUP LENS". PATIENT CONTACT IS UNKNOWN. IF ADDITIONAL INFORMATION IS RECEIVED A SUPPLEMENTAL MEDWATCH REPORT WILL BE SUBMITTED. Manufacturer Narrative: (B)(4). LENS WORK ORDER SEARCH: NO SIMILAR COMPLAINT TYPE EVENTS REPORTED FOR UNITS WITHIN THE SAME …
https://www.accessdata.fda.gov/scripts/cdrh/cfdocs/cfMAUDE/Detail.CFM?MDRFOI__ID=15397093&pc=MTA	2023826-2022-03020		Malfunction	STAAR SURGICAL COMPANY	2022-09-09 04:00:00	MTA	IMPLANTABLE COLLAMER LENS (ICL)	No Apparent Adverse Event	Appropriate Clinical Signs, Symptoms, Conditions Term / Code Not Available	P030016	1	Event Description: THE REPORTER INDICATED THAT THEY ORDERED A 12.6MM VICM5 12.6 OF -2.50 DIOPTER AND RECEIVED A 13.2MM VICM5 13.2 OF -2.50 DIOPTER. THE LENS WAS NOT IMPLANTED INTO THE PATIENTS LEFT EYE (OS). IF ADDITIONAL INFORMATION IS RECEIVED A SUPPLEMENTAL MEDWATCH REPORT WILL BE SUBMITTED. Manufacturer Narrative: H3 - DEVICE EVALUATION: LENS BOX RETURNED UNOPENED. LENS BOX WRAP WAS INTACT, B…
https://www.accessdata.fda.gov/scripts/cdrh/cfdocs/cfMAUDE/Detail.CFM?MDRFOI__ID=15498809&pc=MTA	2023826-2022-03319		Malfunction	STAAR SURGICAL COMPANY	2022-09-28 04:00:00	MTA	IMPLANTABLE COLLAMER LENS (ICL)	No Apparent Adverse Event	Appropriate Clinical Signs, Symptoms, Conditions Term / Code Not Available	P030016	1	Event Description: THE REPORTER INDICATED THE SURGEON IMPLANTED AN EVO IMPLANTABLE COLLAMER LENS, IN THE PATIENTS LEFT EYE (OS). THE PATIENT COMPLAINED OF LOSS OF PERIPHERAL VISION AND THE LENS REMAINED IMPLANTED. ADDITIONAL INFORMATION HAS BEEN REQUESTED BUT NONE HAS BEEN FORTHCOMING. Manufacturer Narrative: (B)(4).
https://www.accessdata.fda.gov/scripts/cdrh/cfdocs/cfMAUDE/Detail.CFM?MDRFOI__ID=15498900&pc=MTA	2023826-2022-03318		Malfunction	STAAR SURGICAL COMPANY	2022-09-28 04:00:00	MTA	IMPLANTABLE COLLAMER LENS (ICL)	No Apparent Adverse Event	Appropriate Clinical Signs, Symptoms, Conditions Term / Code Not Available	P030016	1	Event Description: THE REPORTER INDICATED THE SURGEON IMPLANTED AN EVO IMPLANTABLE COLLAMER LENS, IN THE PATIENTS RIGHT EYE (OD). THE PATIENT COMPLAINED OF LOSS OF PERIPHERAL VISION AND THE LENS REMAINED IMPLANTED. ADDITIONAL INFORMATION HAS BEEN REQUESTED BUT NONE HAS BEEN FORTHCOMING. Manufacturer Narrative: CLAIM #: (B)(4).
https://www.accessdata.fda.gov/scripts/cdrh/cfdocs/cfMAUDE/Detail.CFM?MDRFOI__ID=15567539&pc=MTA	2023826-2022-03583		Malfunction	STAAR SURGICAL COMPANY	2022-10-07 04:00:00	MTA	IMPLANTABLE COLLAMER LENS (ICL)	No Apparent Adverse Event	Appropriate Clinical Signs, Symptoms, Conditions Term / Code Not Available	P030016	1	Event Description: THE REPORTER INDICATED THAT THE SURGEON IMPLANTED AN IMPLANTABLE COLLAMER LENS INTO THE PATIENT'S EYE. IT WAS INDICATED THAT THE LENS WAS SITTING SLIGHTLY LOWER THAN ANTICIPATED. THE LENS REMAINS IMPLANTED AND IT WAS NOTED THEY ARE NOT EXCHANGING THE LENS. ATTEMPTS TO OBTAIN ADDITIONAL INFORMATION HAVE NOT BEEN SUCCESSFUL. IF ADDITIONAL INFORMATION IS RECEIVED A SUPPLEMENTAL ME…
https://www.accessdata.fda.gov/scripts/cdrh/cfdocs/cfMAUDE/Detail.CFM?MDRFOI__ID=16309074&pc=MTA	2023826-2023-00444		Malfunction	STAAR SURGICAL COMPANY	2023-02-06 05:00:00	MTA	IMPLANTABLE COLLAMER LENS (ICL)	No Apparent Adverse Event	Appropriate Clinical Signs, Symptoms, Conditions Term / Code Not Available	P030016	1	Event Description: THE REPORTER INDICATED THAT THE SURGEON IMPLANTED AN IMPLANTABLE COLLAMER LENS INTO THE PATIENT'S EYE. THE SURGEON REPORTS THERE WAS A HYPEROPIC OUTCOME. LENS REMAINS IMPLANTED. ATTEMPTS TO OBTAIN ADDITIONAL INFORMATION HAVE NOT BEEN SUCCESSFUL. IF ADDITIONAL INFORMATION IS RECEIVED A SUPPLEMENTAL MEDWATCH REPORT WILL BE SUBMITTED. Manufacturer Narrative: CLAIM#: (B)(4).
https://www.accessdata.fda.gov/scripts/cdrh/cfdocs/cfMAUDE/Detail.CFM?MDRFOI__ID=16417451&pc=MTA	2023826-2023-00610		Malfunction	STAAR SURGICAL COMPANY	2023-02-22 05:00:00	MTA	IMPLANTABLE COLLAMER LENS (ICL)	No Apparent Adverse Event	Appropriate Clinical Signs, Symptoms, Conditions Term / Code Not Available	P030016	1	Event Description: THE REPORTER INDICATED THAT A 12.1MM VICM5 12.1 IMPLANTABLE COLLAMER LENS OF -6.0 DIOPTER WAS IMPLANTED INTO THE PATIENTS LEFT EYE (OS) ON (B)(6)2022 AS AN EXCHANGE LENS TO RESOLVE EXCESSIVE VAULT. ALTHOUGH HE PROBLEM OF EXCESSIVE VAULT WAS RESOLVED PATIENT HAS POOR NAKED EYE VISION DUE TO INDUCED ASTIGMATISM. NO ADDITIONAL INFORMATION HAS BEEN PROVIDED. IF ADDITIONAL INFORMATI…
https://www.accessdata.fda.gov/scripts/cdrh/cfdocs/cfMAUDE/Detail.CFM?MDRFOI__ID=16603892&pc=MTA	2023826-2023-00947		Malfunction	STAAR SURGICAL COMPANY	2023-03-23 04:00:00	MTA	IMPLANTABLE COLLAMER LENS (ICL)	No Apparent Adverse Event	Appropriate Clinical Signs, Symptoms, Conditions Term / Code Not Available	P030016	1	Event Description: THE REPORTER INDICATED THE SURGEON IMPLANTED AN ICL IMPLANTABLE COLLAMER LENS. THE SURGEON NOTED PIGMENT DISPERSION ON THE LENS. THE LENS REMAINED IMPLANTED. ADDITIONAL INFORMATION HAS BEEN REQUESTED BUT NONE HAS BEEN FORTHCOMING. Manufacturer Narrative: PATIENT DATE OF BIRTH: UNK. PATIENT SEX: UNK. PATIENT WEIGHT: UNK. PATIENT ETHNICITY: UNK. PATIENT RACE: UNK. DATE OF EVENT: …
https://www.accessdata.fda.gov/scripts/cdrh/cfdocs/cfMAUDE/Detail.CFM?MDRFOI__ID=17515448&pc=MTA	2023826-2023-03416		Malfunction	STAAR SURGICAL COMPANY	2023-08-11 04:00:00	MTA	IMPLANTABLE COLLAMER LENS (ICL)	No Apparent Adverse Event	Appropriate Clinical Signs, Symptoms, Conditions Term / Code Not Available	P030016	1	Event Description: THE REPORTER INDICATED THE SURGEON IMPLANTED AN ICLIMPLANTABLE COLLAMER LENS, INTO THE PATIENTS LEFT EYE (OS) IN (B)(6) 2023. THE PATIENT HAD MINIMAL CYLINDER, HAZE TO HER LEFT CORNEA (UNCLEAR ETIOLOGY). SHE ENDED UP IN LEFT EYE 20/25 BUT IS BOTHERED BY A LACK OF CLARITY. REFRACTION IS PL-1.25X 175. THE LENS REMAINED IMPLANTED. ADDITIONAL INFORMATION HAS BEEN REQUESTED BUT NONE…
https://www.accessdata.fda.gov/scripts/cdrh/cfdocs/cfMAUDE/Detail.CFM?MDRFOI__ID=17574481&pc=MTA	2023826-2023-03340		Malfunction	STAAR SURGICAL COMPANY	2023-08-18 04:00:00	MTA	IMPLANTABLE COLLAMER LENS (ICL)	No Apparent Adverse Event	Appropriate Clinical Signs, Symptoms, Conditions Term / Code Not Available		1	Event Description: THE REPORTER INDICATED THAT AN IMPLANTABLE COLLAMER LENS WAS IMPLANTED INTO THE PATIENTS EYE ON (B)(6) 2023. REPORTEDLY EXCESSIVE VAULT AND RESIDUAL CYLINDER WAS OBSERVED. THE LENS REMAINS IMPLANTED. ATTEMPTS TO OBTAIN ADDITIONAL INFORMATION HAVE NOT BEEN SUCCESSFUL. IF ADDITIONAL INFORMATION IS RECEIVED A SUPPLEMENTAL MEDWATCH REPORT WILL BE SUBMITTED. Manufacturer Narrative: …
https://www.accessdata.fda.gov/scripts/cdrh/cfdocs/cfMAUDE/Detail.CFM?MDRFOI__ID=17574503&pc=MTA	2023826-2023-03341		Malfunction	STAAR SURGICAL COMPANY	2023-08-18 04:00:00	MTA	IMPLANTABLE COLLAMER LENS (ICL)	No Apparent Adverse Event	Appropriate Clinical Signs, Symptoms, Conditions Term / Code Not Available		1	Event Description: THE REPORTER INDICATED THAT AN IMPLANTABLE COLLAMER LENS WAS IMPLANTED INTO THE PATIENTS EYE ON (B)(6) 2023. REPORTEDLY EXCESSIVE VAULT AND RESIDUAL CYLINDER WAS OBSERVED. THE LENS REMAINS IMPLANTED. ATTEMPTS TO OBTAIN ADDITIONAL INFORMATION HAVE NOT BEEN SUCCESSFUL. IF ADDITIONAL INFORMATION IS RECEIVED A SUPPLEMENTAL MEDWATCH REPORT WILL BE SUBMITTED. Manufacturer Narrative: …
https://www.accessdata.fda.gov/scripts/cdrh/cfdocs/cfMAUDE/Detail.CFM?MDRFOI__ID=17792198&pc=MTA	2023826-2023-03988		Injury	STAAR SURGICAL COMPANY	2023-09-21 04:00:00	MTA	IMPLANTABLE COLLAMER LENS (ICL)	No Apparent Adverse Event	Appropriate Clinical Signs, Symptoms, Conditions Term / Code Not Available	P030016	1	Event Description: THE REPORTER INDICATED THE SURGEON IMPLANTED A 12.6MM VICM5_12.6 IMPLANTABLE COLLAMER LENS, -10.50 DIOPTER, INTO THE PATIENTS RIGHT EYE (OD) ON (B)(6) 2023. POST-OP THERE WAS 1+ PIGMENT IN ANTERIOR CHAMBER, IRIS WAS RESOLVING. THE PROBLEM WAS RESOLVED. THE LENS REMAINED IMPLANTED. Manufacturer Narrative: H6: HEALTH IMPACT- CLINICAL CODE: 4581 - PIGMENT IN AC. H6 - WORK ORDER SE…
https://www.accessdata.fda.gov/scripts/cdrh/cfdocs/cfMAUDE/Detail.CFM?MDRFOI__ID=17813875&pc=MTA	2023826-2023-03989		Injury	STAAR SURGICAL COMPANY	2023-09-25 04:00:00	MTA	IMPLANTABLE COLLAMER LENS (ICL)	No Apparent Adverse Event	Appropriate Clinical Signs, Symptoms, Conditions Term / Code Not Available	P030016	1	Event Description: THE REPORTER INDICATED THE SURGEON IMPLANTED A 12.6MM VICM5_12.6 IMPLANTABLE COLLAMER LENS, -10.00 DIOPTER, INTO THE PATIENTS LEFT EYE (OS) ON (B)(6) 2023. POST-OP THERE WAS 1+ PIGMENT IN ANTERIOR CHAMBER, IRIS WAS RESOLVING. THE PROBLEM WAS RESOLVED. THE LENS REMAINED IMPLANTED. Manufacturer Narrative: H6 - WORK ORDER SEARCH: NO SIMILAR COMPLAINT WAS REPORTED FOR UNITS WITHIN …
https://www.accessdata.fda.gov/scripts/cdrh/cfdocs/cfMAUDE/Detail.CFM?MDRFOI__ID=17954491&pc=MTA	2023826-2023-04628		Malfunction	STAAR SURGICAL COMPANY	2023-10-17 04:00:00	MTA	IMPLANTABLE COLLAMER LENS (ICL)	No Apparent Adverse Event	Appropriate Clinical Signs, Symptoms, Conditions Term / Code Not Available	P030016	1	Event Description: THE REPORTER INDICATED THAT A 13.2MM VICM5_13.2 IMPLANTABLE COLLAMER LENS OF -11.00 DIOPTER WAS IMPLANTED INTO THE PATIENTS RIGHT EYE (OD) ON (B)(6) 2023. MILD SHALLOWING OF THE ACD WAS REPORTED, HOWEVER IT WAS ALSO REPORTED THAT MEDICAL OR SURGICAL INTERVENTION IS NOT NECESSARY. "LENS SIZE A BIT OFF" WAS REPORTED FOR CAUSE OF EVENT. THE REPORTER STATED THAT THE PATIENTS CURREN…
https://www.accessdata.fda.gov/scripts/cdrh/cfdocs/cfMAUDE/Detail.CFM?MDRFOI__ID=18249789&pc=MTA	2023826-2023-05292		Malfunction	STAAR SURGICAL COMPANY	2023-12-01 05:00:00	MTA	IMPLANTABLE COLLAMER LENS (ICL)	No Apparent Adverse Event	Appropriate Clinical Signs, Symptoms, Conditions Term / Code Not Available	P030016	1	Event Description: THE REPORTER INDICATED THE SURGEON IMPLANTED AN ICL IMPLANTABLE COLLAMER LENS. THE PATIENT COMPLAINED OF "WAVY VISION" AT 3 WEEKS POST-OP. THE LENS REMAINED IMPLANTED. ADDITIONAL INFORMATION HAS BEEN REQUESTED BUT NONE HAS BEEN FORTHCOMING. Manufacturer Narrative: H6: HEALTH IMPACT- CLINICAL CODE: 4581 - WAVY VISION. CLAIM # (B)(4).
https://www.accessdata.fda.gov/scripts/cdrh/cfdocs/cfMAUDE/Detail.CFM?MDRFOI__ID=13896093&pc=MTA	2023826-2022-00891		Malfunction	STAAR SURGICAL COMPANY AG	2022-03-24 04:00:00	MTA	IMPLANTABLE COLLAMER LENS (ICL)	No Apparent Adverse Event	Appropriate Clinical Signs, Symptoms, Conditions Term / Code Not Available	NA	1	Event Description: THE REPORTER INDICATED THE SURGEON IMPLANTED A 13.2MM VICM13.2 IMPLANTABLE COLLAMER LENS, -05.00 DIOPTER, IN THE PATIENTS LEFT EYE (OS), ON (B)(6) 2011. THE PLAN IS TO EXPLANT THE LENS DUE TO PROGRESSIVE MYOPIA. THE LENS REMAINED IMPLANTED. ADDITIONAL INFORMATION HAS BEEN REQUESTED BUT NONE HAS BEEN FORTHCOMING. Manufacturer Narrative: SEX: UNK. WEIGHT: UNK. ETHNICITY: UNK. RAC…
https://www.accessdata.fda.gov/scripts/cdrh/cfdocs/cfMAUDE/Detail.CFM?MDRFOI__ID=17725921&pc=MTA	2023826-2023-04005	2003-08-29 04:00:00	Injury	STAAR SURGICAL COMPANY	2023-09-11 04:00:00	MTA	IMPLANTABLE COLLAMER LENS (ICL)	Off-Label Use; Adverse Event Without Identified Device or Use Problem	Appropriate Clinical Signs, Symptoms, Conditions Term / Code Not Available	P030016	1	Event Description: THE REPORTER INDICATED THAT THE SURGEON IMPLANTED A 12.6MM VICMO12.6; -5.0 DIOPTER IMPLANTABLE COLLAMER LENS INTO THE PATIENT'S RIGHT EYE (OD) ON (B)(6) 2023 . THE PATIENT EXPERIENCED SIGNIFICANT REDUCTION OF IRIDO-CORNEAL ANGLES. ON (B)(6) 2023 THE LENS WAS EXCHANGED WITH A SHORTER LENGTH LENS AND THIS RESOLVED THE PROBLEM. THE CAUSE OF THE EVENT WAS REPORTED AS UNKNOWN. Manuf…
https://www.accessdata.fda.gov/scripts/cdrh/cfdocs/cfMAUDE/Detail.CFM?MDRFOI__ID=11860704&pc=MTA	2023826-2021-01598	2021-02-06	Injury	STAAR SURGICAL COMPANY	2021-05-20	MTA	IMPLANTABLE COLLAMER LENS (ICL)	Off-Label Use; Adverse Event Without Identified Device or Use Problem	Appropriate Clinical Signs, Symptoms, Conditions Term / Code Not Available	N/A	1	Event Description: THE REPORTER INDICATED THE SURGEON IMPLANTED A 12.6MM VICM5_12.6 IMPLANTABLE COLLAMER LENS, DIOPTER -5.00 INTO THE PATIENT'S LEFT EYE (OS) ON (B)(6) 2021. ON (B)(6) 2021 THE LENS WAS EXPLANTED DUE TO THE PATIENT WAS NOT SATISFIED WITH HIS POSTOPERATIVE VISUAL ACUITY. THE CAUSE OF THE EVENT IS REPORTED AS UNKNOWN. Manufacturer Narrative: THIS PRODUCT IS NOT MARKETED IN THE US. H…
https://www.accessdata.fda.gov/scripts/cdrh/cfdocs/cfMAUDE/Detail.CFM?MDRFOI__ID=11860730&pc=MTA	2023826-2021-01597	2021-02-06	Injury	STAAR SURGICAL COMPANY	2021-05-20	MTA	IMPLANTABLE COLLAMER LENS (ICL)	Off-Label Use; Adverse Event Without Identified Device or Use Problem	Appropriate Clinical Signs, Symptoms, Conditions Term / Code Not Available	N/A	1	Event Description: THE REPORTER INDICATED THE SURGEON IMPLANTED A 12.6MM VICM5_12.6 IMPLANTABLE COLLAMER LENS, DIOPTER -6.00 INTO THE PATIENT'S RIGHT EYE (OD) ON (B)(6) 2021. ON (B)(6) 2021 THE LENS WAS EXPLANTED DUE TO THE PATIENT WAS NOT SATISFIED WITH HIS POSTOPERATIVE VISUAL ACUITY. THE CAUSE OF THE EVENT IS REPORTED AS UNKNOWN. Manufacturer Narrative: WEIGHT, ETHNICITY, RACE-UNK. THIS PRODUC…
https://www.accessdata.fda.gov/scripts/cdrh/cfdocs/cfMAUDE/Detail.CFM?MDRFOI__ID=18234535&pc=MTA	2023826-2023-05297	2023-07-25 04:00:00	Injury	STAAR SURGICAL COMPANY	2023-11-29 05:00:00	MTA	IMPLANTABLE COLLAMER LENS (ICL)	Off-Label Use; Adverse Event Without Identified Device or Use Problem	Appropriate Clinical Signs, Symptoms, Conditions Term / Code Not Available	P030016	1	Event Description: THE REPORTER INDICATED THE SURGEON IMPLANTED A 12.6MM VICM5_12.6 IMPLANTABLE COLLAMER LENS, -08.50 DIOPTER, INTO THE PATIENTS RIGHT EYE (OD) ON (B)(6) 2022. THE SURGEON PERFORMED AN LRI TO CORRECT ASTIGMATISM BUT THE ASTIGMATISM WAS NOT FULLY CORRECTED. THE LENS WAS REMOVED ON (B)(6) 2023 DUE TO THE PATIENT WAS DISSATISFIED WITH VISUAL ACUITY. THE LENS WAS REPLACED WITH A DIFFE…
https://www.accessdata.fda.gov/scripts/cdrh/cfdocs/cfMAUDE/Detail.CFM?MDRFOI__ID=17725918&pc=MTA	2023826-2023-04006	2023-09-02 04:00:00	Injury	STAAR SURGICAL COMPANY	2023-09-11 04:00:00	MTA	IMPLANTABLE COLLAMER LENS (ICL)	Off-Label Use; Adverse Event Without Identified Device or Use Problem	Appropriate Clinical Signs, Symptoms, Conditions Term / Code Not Available	P030016	1	Event Description: THE REPORTER INDICATED THAT THE SURGEON IMPLANTED A 12.6MM VICMO12.6; -5.0 DIOPTER IMPLANTABLE COLLAMER LENS INTO THE PATIENT'S LEFT EYE (OS) ON (B)(6) 2023. THE PATIENT EXPERIENCED SIGNIFICANT REDUCTION OF IRIDO-CORNEAL ANGLES. ON (B)(6) 2023, THE LENS WAS EXCHANGED WITH A SHORTER LENGTH LENS AND THIS RESOLVED THE PROBLEM. THE CAUSE OF THE EVENT WAS REPORTED AS UNKNOWN. Manufa…
https://www.accessdata.fda.gov/scripts/cdrh/cfdocs/cfMAUDE/Detail.CFM?MDRFOI__ID=13582968&pc=MTA	2023826-2022-00596		Malfunction	STAAR SURGICAL COMPANY	2022-02-23 05:00:00	MTA	IMPLANTABLE COLLAMER LENS (ICL)	Off-Label Use; Adverse Event Without Identified Device or Use Problem	Appropriate Clinical Signs, Symptoms, Conditions Term / Code Not Available	NA	1	Event Description: THE REPORTER INDICATED THAT A 12.6MM, VTICM5_12.6, IMPLANTABLE COLLAMER LENS WAS IMPLANTED INTO THE PATIENTS LEFT (OS) EYE ON (B)(6) 2021 AS A REPLACEMENT LENS AND " FEW IRIS PIGMENTS IN ENDOTHELIUM" WAS OBSERVED. IF ADDITIONAL INFORMATION IS RECEIVED A SUPPLEMENTAL MEDWATCH REPORT WILL BE SUBMITTED.Event Description: THE REPORTER INDICATED THAT A 12.6MM, VTICM5_12.6, IMPLANTAB…
https://www.accessdata.fda.gov/scripts/cdrh/cfdocs/cfMAUDE/Detail.CFM?MDRFOI__ID=13674056&pc=MTA	2023826-2022-00747		Injury	STAAR SURGICAL COMPANY	2022-03-04 05:00:00	MTA	IMPLANTABLE COLLAMER LENS (ICL)	Off-Label Use; Adverse Event Without Identified Device or Use Problem	Appropriate Clinical Signs, Symptoms, Conditions Term / Code Not Available	N/A	1	Event Description: THE REPORTER INDICATED THAT A 12.6MM VICM5 12.6 IMPLANTABLE COLLAMER LENS OF -12.5 DIOPTER WAS IMPLANTED INTO THE PATIENTS RIGHT EYE (OD) ON (B)(6) 2022 AS AN EXCHANGE LENS TO RESOLVE EXCESSIVE VAULT. AFTER LENS IMPLANTATION THE VAULT IS GOOD, BUT THE PATIENT HAS SLIGHT IRIS TIDS. THIS IS DUE TO INTRAOPERATIVE FLOPPY IRIS SYNDROME. THE REPORTER STATES THAT "THE PATIENT DID NOT …
https://www.accessdata.fda.gov/scripts/cdrh/cfdocs/cfMAUDE/Detail.CFM?MDRFOI__ID=14639426&pc=MTA	2023826-2022-01776		Injury	STAAR SURGICAL COMPANY	2022-06-08 04:00:00	MTA	IMPLANTABLE COLLAMER LENS (ICL)	Off-Label Use; Adverse Event Without Identified Device or Use Problem	Appropriate Clinical Signs, Symptoms, Conditions Term / Code Not Available	P030016	1	Event Description: THE REPORTER INDICATED THE SURGEON IMPLANTED A 13.2MM VICMO13.2 IMPLANTABLE COLLAMER LENS, -10.00 DIOPTER, IN THE PATIENTS RIGHT EYE (OD), ON (B)(6) 2022. THE LENS WAS REPORTED AS HAVING A COMPLICATION DUE TO VISCO. THE PATIENT HAD AN ISCHEMIC OPTIC NEUROPATHY DUE TO VISCO. AT SOME POINT THE PATIENT ONLY HAD LIGHT PERCEPTION BUT IS NOW RECOVERING. PATIENT HAS MYDRIASIS DUE TO I…
https://www.accessdata.fda.gov/scripts/cdrh/cfdocs/cfMAUDE/Detail.CFM?MDRFOI__ID=17391267&pc=MTA	2023826-2023-03042		Injury	STAAR SURGICAL COMPANY	2023-07-25 04:00:00	MTA	IMPLANTABLE COLLAMER LENS (ICL)	Off-Label Use; Adverse Event Without Identified Device or Use Problem	Appropriate Clinical Signs, Symptoms, Conditions Term / Code Not Available	P030016	1	Event Description: THE REPORTER INDICATED THAT A 12.6MM VICM5 12.6, -13.00 DIOPTER, IMPLANTABLE COLLAMER LENS WAS IMPLANTED AND REMOVED INTRAOPERATIVELY ON (B)(6) 2023 FROM PATIENT'S RIGHT EYE (OD) DUE TO PUPIL DISCLOSURE AND CATARACT. PHACO-EMULSIFICATION(CATARACT SURGERY) & IOL IMPLANTATION PERFORMED. THE PROBLEM WAS RESOLVED. CAUSE OF THE EVENT IS REPORTED AS USER ERROR AND THE DEVICE DID NOT …
https://www.accessdata.fda.gov/scripts/cdrh/cfdocs/cfMAUDE/Detail.CFM?MDRFOI__ID=16864757&pc=MTA	2023826-2023-01596	2023-03-06 05:00:00	Injury	STAAR SURGICAL COMPANY	2023-05-03 04:00:00	MTA	IMPLANTABLE COLLAMER LENS (ICL)	Off-Label Use; Adverse Event Without Identified Device or Use Problem; No Apparent Adverse Event	Appropriate Clinical Signs, Symptoms, Conditions Term / Code Not Available	P030016	1	Event Description: THE REPORTER INDICATED THE SURGEON IMPLANTED A 12.6MM VICMO12.6 IMPLANTABLE COLLAMER LENS, -09.50 DIOPTER, IN THE PATIENTS RIGHT EYE (OD), ON (B)(6) 2013. THE LENS WAS REPORTED AS REFRACTIVE CHANGE OVERTIME AND REMAINED IMPLANTED. ADDITIONAL INFORMATION HAS BEEN REQUESTED BUT NONE HAS BEEN FORTHCOMING. Manufacturer Narrative: HEALTH IMPACT- CLINICAL CODE: 4581 - REFRACTIVE CHAN…
https://www.accessdata.fda.gov/scripts/cdrh/cfdocs/cfMAUDE/Detail.CFM?MDRFOI__ID=16871546&pc=MTA	2023826-2023-01597	2023-03-06 05:00:00	Injury	STAAR SURGICAL COMPANY	2023-05-04 04:00:00	MTA	IMPLANTABLE COLLAMER LENS (ICL)	Off-Label Use; Adverse Event Without Identified Device or Use Problem; No Apparent Adverse Event	Appropriate Clinical Signs, Symptoms, Conditions Term / Code Not Available	P030016	1	Event Description: THE REPORTER INDICATED THE SURGEON IMPLANTED A 13.2MM VICMO13.2 IMPLANTABLE COLLAMER LENS, -11.00 DIOPTER, IN THE PATIENTS LEFT EYE (OS), ON (B)(6) 2013. THE LENS WAS REPORTED AS REFRACTIVE CHANGE OVERTIME AND REMAINED IMPLANTED. ADDITIONAL INFORMATION HAS BEEN REQUESTED BUT NONE HAS BEEN FORTHCOMING. Manufacturer Narrative: B5: THE LENS WAS REMOVED AND REPLACED ON (B)(6) 2023.…
https://www.accessdata.fda.gov/scripts/cdrh/cfdocs/cfMAUDE/Detail.CFM?MDRFOI__ID=11135886&pc=MTA	2023826-2021-00057	2020-09-06 04:00:00	Injury	STAAR SURGICAL COMPANY	2021-01-07 05:00:00	MTA	IMPLANTABLE COLLAMER LENS (ICL)	Off-Label Use; Inadequacy of Device Shape and/or Size	Appropriate Clinical Signs, Symptoms, Conditions Term / Code Not Available	N/A	1	Event Description: THE REPORTER INDICATED THE SURGEON IMPLANTED A 13.2MM VICMO13.2 IMPLANTABLE COLLAMER LENS, DIOPTER -11.5 INTO THE PATIENT'S LEFT EYE (OS) ON (B)(6) 2020. ON (B)(6) 2020 THE LENS WAS EXCHANGED WITH A SHORTER LENS DUE TO EXCESSIVE VAULT AND SIGNIFICANT REDUCTION OF IRIDO-CORNEAL ANGLES (ICA) AND THE PROBLEM WAS RESOLVED. THE CAUSE OF THE EVENT IS REPORTED AS UNKNOWN. Manufacturer…
https://www.accessdata.fda.gov/scripts/cdrh/cfdocs/cfMAUDE/Detail.CFM?MDRFOI__ID=12242102&pc=MTA	2023826-2021-02923	2020-12-01	Injury	STAAR SURGICAL COMPANY	2021-07-28	MTA	IMPLANTABLE COLLAMER LENS (ICL)	Off-Label Use; Inadequacy of Device Shape and/or Size	Appropriate Clinical Signs, Symptoms, Conditions Term / Code Not Available	NA	1	Event Description: THE REPORTER INDICATED THE SURGEON IMPLANTED A 13.2MM VICMO13.2 IMPLANTABLE COLLAMER LENS, -06.00 DIOPTER, IN THE PATIENTS RIGHT EYE (OD), ON (B)(6) 2020. THE LENS WAS EXPLANTED ON (B)(6) 2020 DUE TO EXCESSIVE VAULTING AND SIGNIFICANT REDUCTION OF IRIDO-CORNEAL ANGLES. THE LENS WAS EXCHANGED FOR A SHORTER LENS AND THE PROBLEM WAS RESOLVED. THE CAUSE OF THE EVENT WAS UNKNOWN. Ma…
https://www.accessdata.fda.gov/scripts/cdrh/cfdocs/cfMAUDE/Detail.CFM?MDRFOI__ID=12246275&pc=MTA	2023826-2021-02924	2020-12-01 05:00:00	Injury	STAAR SURGICAL COMPANY	2021-07-29 04:00:00	MTA	IMPLANTABLE COLLAMER LENS (ICL)	Off-Label Use; Inadequacy of Device Shape and/or Size	Appropriate Clinical Signs, Symptoms, Conditions Term / Code Not Available	NA	1	Event Description: THE REPORTER INDICATED THE SURGEON IMPLANTED A 13.2MM VICMO13.2 IMPLANTABLE COLLAMER LENS, -05.50 DIOPTER, IN THE PATIENTS LEFT EYE (OS), ON (B)(6) 2020. THE LENS WAS EXPLANTED ON (B)(6) 2020 DUE TO EXCESSIVE VAULTING AND SIGNIFICANT REDUCTION OF IRIDO-CORNEAL ANGLES. THE LENS WAS EXCHANGED FOR A SHORTER LENS AND THE PROBLEM WAS RESOLVED. THE CAUSE OF THE EVENT WAS UNKNOWN. Man…
https://www.accessdata.fda.gov/scripts/cdrh/cfdocs/cfMAUDE/Detail.CFM?MDRFOI__ID=11891206&pc=MTA	2023826-2021-01704	2020-12-31	Malfunction	STAAR SURGICAL COMPANY	2021-05-26	MTA	IMPLANTABLE COLLAMER LENS (ICL)	Off-Label Use; Inadequacy of Device Shape and/or Size	Appropriate Clinical Signs, Symptoms, Conditions Term / Code Not Available	NA	1	Event Description: THE REPORTER INDICATED THAT A 12.6MM ,VICMO12.6, -8.50 DIOPTER, IMPLANTABLE COLLAMER LENS WAS IMPLANTED INTO THE PATIENTS RIGHT EYE (OD) ON (B)(6) 2020. THE LENS WAS REMOVED AND REPLACED FOR A SHORTER LENGTH LENS WITHIN THE SAME SURGERY DUE TO EXCESSIVE VAULT AND SIGNIFICANT REDUCTION OF IRIDO-CORNEAL ANGLES. IT WAS REPORTED THAT THE PROBLEM RESOLVED. CAUSE OF EVENT WAS REPORTE…
https://www.accessdata.fda.gov/scripts/cdrh/cfdocs/cfMAUDE/Detail.CFM?MDRFOI__ID=11522549&pc=MTA	2023826-2021-00684	2021-01-24 05:00:00	Injury	STAAR SURGICAL COMPANY	2021-03-19 04:00:00	MTA	IMPLANTABLE COLLAMER LENS (ICL)	Off-Label Use; Inadequacy of Device Shape and/or Size	Appropriate Clinical Signs, Symptoms, Conditions Term / Code Not Available	NA	1	Event Description: THE REPORTER INDICATED THAT A 12.6MM, VICMO12.6, -5.0 DIOPTER, IMPLANTABLE COLLAMER LENS WAS IMPLANTED INTO THE PATIENTS RIGHT EYE (OD) ON (B)(6) 2021. ON (B)(6) 2021 THE LENS WAS EXCHANGED FOR A SHORTER LENGTH LENS DUE TO EXCESSIVE VAULT AND SIGNIFICANT REDUCTION OF ENDOTHELIAL CELL COUNT OR SIGNIFICANT ENDOTHELIAL CELL LOSS. THIS EXCHANGE RESOLVED THE PROBLEM. CAUSE OF THE EV…
https://www.accessdata.fda.gov/scripts/cdrh/cfdocs/cfMAUDE/Detail.CFM?MDRFOI__ID=12108819&pc=MTA	2023826-2021-02190	2021-05-13	Injury	STAAR SURGICAL COMPANY	2021-07-02	MTA	IMPLANTABLE COLLAMER LENS (ICL)	Off-Label Use; Inadequacy of Device Shape and/or Size	Appropriate Clinical Signs, Symptoms, Conditions Term / Code Not Available	NA	1	Event Description: THE REPORTER INDICATED THE SURGEON IMPLANTED A 13.2MM VICMO13.2 IMPLANTABLE COLLAMER LENS, -10.50 DIOPTER, IN THE PATIENTS RIGHT EYE (OD), ON (B)(6) 2021. THE LENS WAS EXPLANTED ON (B)(6) 2021 DUE TO EXCESSIVE VAULTING AND SIGNIFICANT REDUCTION OF IRIDO-CORNEAL ANGLES. THE LENS WAS EXCHANGED FOR A SHORTER LENS AND THE PROBLEM WAS RESOLVED. THE CAUSE OF THE EVENT WAS UNKNOWN. Ma…
https://www.accessdata.fda.gov/scripts/cdrh/cfdocs/cfMAUDE/Detail.CFM?MDRFOI__ID=12112713&pc=MTA	2023826-2021-02191	2021-05-13	Injury	STAAR SURGICAL COMPANY	2021-07-02	MTA	IMPLANTABLE COLLAMER LENS (ICL)	Off-Label Use; Inadequacy of Device Shape and/or Size	Appropriate Clinical Signs, Symptoms, Conditions Term / Code Not Available	NA	1	Event Description: THE REPORTER INDICATED THE SURGEON IMPLANTED A 13.2MM VICMO13.2 IMPLANTABLE COLLAMER LENS, -09.50 DIOPTER, IN THE PATIENTS LEFT EYE (OS), ON (B)(6) 2021. THE LENS WAS EXPLANTED ON (B)(6) 2021 DUE TO EXCESSIVE VAULTING AND SIGNIFICANT REDUCTION OF IRIDO-CORNEAL ANGLES. THE LENS WAS EXCHANGED FOR A SHORTER LENS AND THE PROBLEM WAS RESOLVED. THE CAUSE OF THE EVENT WAS UNKNOWN. Man…
https://www.accessdata.fda.gov/scripts/cdrh/cfdocs/cfMAUDE/Detail.CFM?MDRFOI__ID=12443623&pc=MTA	2023826-2021-03480	2021-07-26 04:00:00	Injury	STAAR SURGICAL COMPANY	2021-09-08 04:00:00	MTA	IMPLANTABLE COLLAMER LENS (ICL)	Off-Label Use; Inadequacy of Device Shape and/or Size	Appropriate Clinical Signs, Symptoms, Conditions Term / Code Not Available	NA	1	Event Description: THE REPORTER INDICATED THE SURGEON IMPLANTED A 12.1MM VICM5_12.1 IMPLANTABLE COLLAMER LENS, -14.00 DIOPTER, IN THE PATIENTS RIGHT EYE (OD), ON (B)(6) 2021. THE LENS WAS EXPLANTED ON (B)(6) 2021 DUE TO LOW VAULTING AND UNREACTIVE (FIXED) PUPIL. THE LENS WAS REPLACED WITH A LONGER LENS AND THE PROBLEM WAS RESOLVED. THE EYE IS QUIET AND PATIENT IS HAPPY. Manufacturer Narrative: CO…
https://www.accessdata.fda.gov/scripts/cdrh/cfdocs/cfMAUDE/Detail.CFM?MDRFOI__ID=14138554&pc=MTA	2023826-2022-01180	2022-02-24 05:00:00	Injury	STAAR SURGICAL COMPANY	2022-04-18 04:00:00	MTA	IMPLANTABLE COLLAMER LENS (ICL)	Off-Label Use; Inadequacy of Device Shape and/or Size	Appropriate Clinical Signs, Symptoms, Conditions Term / Code Not Available	NA	1	Event Description: THE REPORTER INDICATED THE SURGEON IMPLANTED A 13.2MM VICH13.2 IMPLANTABLE COLLAMER LENS, +06.00 DIOPTER, IN THE PATIENTS LEFT EYE (OS), ON (B)(6) 2022. THE LENS WAS REPORTED AS EXCESSIVE VAULTING AND SIGNIFICANT REDUCTION OF IRIDO-CORNEAL ANGLES. THE LENS REMAINED IMPLANTED. THE CAUSE OF THE EVENT WAS DUE TO THE DEVICE. ADDITIONAL INFORMATION HAS BEEN REQUESTED BUT NONE HAS BE…
https://www.accessdata.fda.gov/scripts/cdrh/cfdocs/cfMAUDE/Detail.CFM?MDRFOI__ID=14985509&pc=MTA	2023826-2022-02124	2022-03-12 05:00:00	Injury	STAAR SURGICAL COMPANY	2022-07-12 04:00:00	MTA	IMPLANTABLE COLLAMER LENS (ICL)	Off-Label Use; Inadequacy of Device Shape and/or Size	Appropriate Clinical Signs, Symptoms, Conditions Term / Code Not Available	P030016	1	Event Description: THE REPORTER INDICATED THAT THE SURGEON IMPLANTED A 12.6MM VICMO12.6, -13.00 DIOPTER, IMPLANTABLE COLLAMER LENS INTO THE PATIENT'S RIGHT EYE (OD) ON (B)(6) 2022. THE LENS WAS REPLACED WITH A LONGER LENGTH LENS DUE TO LOW VAULT ON (B)(6) 2022. THIS RESOLVED THE PROBLEM. CAUSE OF THE EVENT IS REPORTED AS UNKNOWN. Manufacturer Narrative: B)(4). CLAIM # B)(4).
https://www.accessdata.fda.gov/scripts/cdrh/cfdocs/cfMAUDE/Detail.CFM?MDRFOI__ID=14750533&pc=MTA	2023826-2022-01923	2022-05-20 04:00:00	Malfunction	STAAR SURGICAL COMPANY	2022-06-20 04:00:00	MTA	IMPLANTABLE COLLAMER LENS (ICL)	Off-Label Use; Inadequacy of Device Shape and/or Size	Appropriate Clinical Signs, Symptoms, Conditions Term / Code Not Available	P030016	1	Event Description: THE REPORTER INDICATED THAT A 13.2MM VICMO 13.2 IMPLANTABLE COLLAMER LENS OF -15.5 DIOPTER WAS IMPLANTED INTO THE PATIENTS RIGHT EYE (OD) ON (B)(6) 2022. EXCESSIVE VAULT AND SIGNIFICANT REDUCTION OF IRIDO CORNEAL ANGLES WAS OBSERVED. LENS REMAINS IMPLANTED. IF ADDITIONAL INFORMATION IS RECEIVED A SUPPLEMENTAL MEDWATCH REPORT WILL BE SUBMITTED. Manufacturer Narrative: ADDITIONAL…
https://www.accessdata.fda.gov/scripts/cdrh/cfdocs/cfMAUDE/Detail.CFM?MDRFOI__ID=15629417&pc=MTA	2023826-2022-03505	2022-08-06 04:00:00	Injury	STAAR SURGICAL COMPANY	2022-10-18 04:00:00	MTA	IMPLANTABLE COLLAMER LENS (ICL)	Off-Label Use; Inadequacy of Device Shape and/or Size	Appropriate Clinical Signs, Symptoms, Conditions Term / Code Not Available	P030016	1	Event Description: THE REPORTER INDICATED THE SURGEON IMPLANTED A 12.6MM VICMO12.6 IMPLANTABLE COLLAMER LENS, -08.00 DIOPTER, IN THE PATIENTS RIGHT EYE (OD), ON (B)(6) 2022. THE LENS WAS EXPLANTED ON (B)(6) 2022 DUE TO EXCESSIVE VAULTING AND SIGNIFICANT REDUCTION OF IRIDO-CORNEAL ANGLES. THE PROBLEM WAS RESOLVED. THE CAUSE OF THE EVENT WAS UNKNOWN. Manufacturer Narrative: (B)(4). CLAIM # (B)(4).
https://www.accessdata.fda.gov/scripts/cdrh/cfdocs/cfMAUDE/Detail.CFM?MDRFOI__ID=15652542&pc=MTA	2023826-2022-03506	2022-08-06 04:00:00	Injury	STAAR SURGICAL COMPANY	2022-10-21 04:00:00	MTA	IMPLANTABLE COLLAMER LENS (ICL)	Off-Label Use; Inadequacy of Device Shape and/or Size	Appropriate Clinical Signs, Symptoms, Conditions Term / Code Not Available	P030016	1	Event Description: THE REPORTER INDICATED THE SURGEON IMPLANTED A 12.6MM VICMO12.6 IMPLANTABLE COLLAMER LENS, -09.50 DIOPTER, IN THE PATIENTS LEFT EYE (OS), ON (B)(6) 2022. THE LENS WAS EXPLANTED ON (B)(6) 2022 DUE TO EXCESSIVE VAULTING AND SIGNIFICANT REDUCTION OF IRIDO-CORNEAL ANGLES. THE PROBLEM WAS RESOLVED. THE CAUSE OF THE EVENT WAS UNKNOWN. Manufacturer Narrative: H3: DEVICE EVALUATION: TH…
https://www.accessdata.fda.gov/scripts/cdrh/cfdocs/cfMAUDE/Detail.CFM?MDRFOI__ID=16035464&pc=MTA	2023826-2022-04560	2022-10-28 04:00:00	Injury	STAAR SURGICAL COMPANY	2022-12-22 05:00:00	MTA	IMPLANTABLE COLLAMER LENS (ICL)	Off-Label Use; Inadequacy of Device Shape and/or Size	Appropriate Clinical Signs, Symptoms, Conditions Term / Code Not Available	P030016	1	Event Description: THE REPORTER INDICATED THAT THE SURGEON IMPLANTED A 12.6MM VICMO12.6, -06.00 DIOPTER, IMPLANTABLE COLLAMER LENS INTO THE PATIENT'S RIGHT EYE (OD) ON (B)(6) 2022. THE LENS WAS REPLACED WITH A LONGER LENGTH LENS DUE TO LOW VAULT ON (B)(6) 2022. THIS RESOLVED THE PROBLEM. CAUSE OF THE EVENT IS REPORTED AS UNKNOWN. Manufacturer Narrative: WEIGHT - UNK; ETHNICITY - UNK; RACE - UNK. …
https://www.accessdata.fda.gov/scripts/cdrh/cfdocs/cfMAUDE/Detail.CFM?MDRFOI__ID=16673955&pc=MTA	2023826-2023-01060	2022-11-12 05:00:00	Injury	STAAR SURGICAL COMPANY	2023-04-04 04:00:00	MTA	IMPLANTABLE COLLAMER LENS (ICL)	Off-Label Use; Inadequacy of Device Shape and/or Size	Appropriate Clinical Signs, Symptoms, Conditions Term / Code Not Available	P030016	1	Event Description: THE REPORTER INDICATED THAT THE SURGEON IMPLANTED A 12.6MM VICMO12.6, -6.5 DIOPTER, IMPLANTABLE COLLAMER LENS INTO THE PATIENT'S RIGHT EYE (OD) ON (B)(6) 2022. THE LENS WAS REPLACED WITH A LONGER LENGTH LENS DUE TO LOW VAULT ON (B)(6) 2022. THIS RESOLVED THE PROBLEM. CAUSE OF THE EVENT IS REPORTED AS UNKNOWN. Manufacturer Narrative: A4 - UNK. A5 - UNK. A6 - UNK. DEVICE PROBLEM …
https://www.accessdata.fda.gov/scripts/cdrh/cfdocs/cfMAUDE/Detail.CFM?MDRFOI__ID=18170878&pc=MTA	2023826-2023-05170	2023-01-12 05:00:00	Injury	STAAR SURGICAL COMPANY	2023-11-20 05:00:00	MTA	IMPLANTABLE COLLAMER LENS (ICL)	Off-Label Use; Inadequacy of Device Shape and/or Size	Appropriate Clinical Signs, Symptoms, Conditions Term / Code Not Available	P030016	1	Event Description: THE REPORTER INDICATED THAT THE SURGEON IMPLANTED A 12.6MM VICMO12.6 IMPLANTABLE COLLAMER LENS OF DIOPTER -5.5 INTO THE PATIENT'S LEFT EYE (OS) ON (B)(6) 2019. EXCESSIVE VAULT AND SIGNIFICANT REDUCTION OF IRIDO-CORNEAL ANGLES WERE REPORTED. THE LENS WAS EXPLANTED ON (B)(4) 2023 A SHORTER LENGTH LENS WAS IMPLANTED. THIS RESOLVED THE PROBLEM. CAUSE OF EVENT REPORTED AS UNKNOWN. M…
https://www.accessdata.fda.gov/scripts/cdrh/cfdocs/cfMAUDE/Detail.CFM?MDRFOI__ID=16550264&pc=MTA	2023826-2023-00958	2023-01-13 05:00:00	Injury	STAAR SURGICAL COMPANY	2023-03-15 04:00:00	MTA	IMPLANTABLE COLLAMER LENS (ICL)	Off-Label Use; Inadequacy of Device Shape and/or Size	Appropriate Clinical Signs, Symptoms, Conditions Term / Code Not Available	P030016	1	Event Description: THE REPORTER INDICATED THAT THE SURGEON IMPLANTED A 12.6MM VICMO12.6; -10.0 DIOPTER IMPLANTABLE COLLAMER LENS INTO THE PATIENT'S LEFT EYE (OS) ON (B)(6) 2022 . THE PATIENT EXPERIENCED SIGNIFICANT REDUCTION OF IRIDO-CORNEAL ANGLES. ON (B)(6) 2023 THE LENS WAS EXPLANTED AND THIS RESOLVED THE PROBLEM. Manufacturer Narrative: (B)(4).
https://www.accessdata.fda.gov/scripts/cdrh/cfdocs/cfMAUDE/Detail.CFM?MDRFOI__ID=16587801&pc=MTA	2023826-2023-01007	2023-02-23 05:00:00	Malfunction	STAAR SURGICAL COMPANY	2023-03-21 04:00:00	MTA	IMPLANTABLE COLLAMER LENS (ICL)	Off-Label Use; Inadequacy of Device Shape and/or Size	Appropriate Clinical Signs, Symptoms, Conditions Term / Code Not Available	P030016	1	Event Description: THE REPORTER INDICATED THAT THE SURGEON IMPLANTED A 13.7MM VICM5_13.7; -3.5 DIOPTER IMPLANTABLE COLLAMER LENS INTO THE PATIENT'S RIGHT EYE (OD) ON (B)(6) 2023. THE SURGEON REPORTS THE PATIENT HAS EXCESSIVE VAULTING AND SIGNIFICANT REDUCTION OF IRIDO-CORNEAL ANGLES AND SHALLOW AC. THE SURGEON NOTES THEY LIKELY WILL REPLACE THE ICL WITH A SMALLER LENS; EITHER 13.2 OR 12.7. LENS R…
https://www.accessdata.fda.gov/scripts/cdrh/cfdocs/cfMAUDE/Detail.CFM?MDRFOI__ID=16967963&pc=MTA	2023826-2023-01915	2023-03-10 05:00:00	Injury	STAAR SURGICAL COMPANY	2023-05-19 04:00:00	MTA	IMPLANTABLE COLLAMER LENS (ICL)	Off-Label Use; Inadequacy of Device Shape and/or Size	Appropriate Clinical Signs, Symptoms, Conditions Term / Code Not Available	P030016	1	Event Description: THE REPORTER INDICATED THAT THE SURGEON IMPLANTED A 12.6MM VICMO12.6 IMPLANTABLE COLLAMER LENS OF DIOPTER -8.5 INTO THE PATIENT'S LEFT EYE (OS) ON (B)(6) 2023. EXCESSIVE VAULT AND SIGNIFICANT REDUCTION OF IRIDO-CORNEAL ANGLES WERE REPORTED. THE LENS WAS EXPLANTED ON (B)(6) 2023 AND IN ANOTHER SURGERY THAT DAY A SHORTER LENGTH LENS WAS IMPLANTED. THIS RESOLVED THE PROBLEM. CAUSE…
https://www.accessdata.fda.gov/scripts/cdrh/cfdocs/cfMAUDE/Detail.CFM?MDRFOI__ID=18307785&pc=MTA	2023826-2023-05437	2023-07-07 04:00:00	Injury	STAAR SURGICAL COMPANY	2023-12-11 05:00:00	MTA	IMPLANTABLE COLLAMER LENS (ICL)	Off-Label Use; Inadequacy of Device Shape and/or Size	Appropriate Clinical Signs, Symptoms, Conditions Term / Code Not Available	N/A	1	Event Description: THE REPORTER INDICATED THAT A 13.2MM VICH 13.2 IMPLANTABLE COLLAMER LENS OF +3.00 DIOPTER WAS IMPLANTED INTO THE PATIENT'S RIGHT EYE (OD) ON (B)(6) 2023. EXCESSIVE VAULT WITH SIGNIFICANT REDUCTION OF IRIDO-CORNEAL ANGLES WAS OBSERVED. ON (B)(6) 2023 THE LENS WAS EXPLANTED AND THE PROBLEM WAS RESOLVED. Manufacturer Narrative: H6-CLINICAL SIGNS 4581: SIGNIFICANT REDUCTION OF IRID…
https://www.accessdata.fda.gov/scripts/cdrh/cfdocs/cfMAUDE/Detail.CFM?MDRFOI__ID=18307809&pc=MTA	2023826-2023-05438	2023-07-07 04:00:00	Injury	STAAR SURGICAL COMPANY	2023-12-11 05:00:00	MTA	IMPLANTABLE COLLAMER LENS (ICL)	Off-Label Use; Inadequacy of Device Shape and/or Size	Appropriate Clinical Signs, Symptoms, Conditions Term / Code Not Available	N/A	1	Event Description: THE REPORTER INDICATED THAT A 13.2MM VICH 13.2 IMPLANTABLE COLLAMER LENS OF +2.75 DIOPTER WAS IMPLANTED INTO THE PATIENT'S LEFT EYE (OS) ON (B)(6) 2023. EXCESSIVE VAULT WITH SIGNIFICANT REDUCTION OF IRIDO-CORNEAL ANGLES WAS OBSERVED. ON (B)(6) 2023, THE LENS WAS EXPLANTED AND THE PROBLEM WAS RESOLVED. Manufacturer Narrative: H6-CLINICAL SIGNS 4581: SIGNIFICANT REDUCTION OF IRID…
https://www.accessdata.fda.gov/scripts/cdrh/cfdocs/cfMAUDE/Detail.CFM?MDRFOI__ID=18086570&pc=MTA	2023826-2023-04884	2023-08-26 04:00:00	Injury	STAAR SURGICAL COMPANY	2023-11-07 05:00:00	MTA	IMPLANTABLE COLLAMER LENS (ICL)	Off-Label Use; Inadequacy of Device Shape and/or Size	Appropriate Clinical Signs, Symptoms, Conditions Term / Code Not Available	P030016	1	Event Description: THE REPORTER INDICATED THAT THE SURGEON IMPLANTED A 12.6MM VICMO12.6 IMPLANTABLE COLLAMER LENS OF DIOPTER -6.5 INTO THE PATIENT'S LEFT EYE (OS) ON (B)(6) 2023. THE LENS WAS EXCHANGED ON (B)(6) 2023 FOR A SHORTER LENGTH LENS DUE TO EXCESSIVE VAULT AND SIGNIFICANT REDUCTION OF IRIDO-CORNEAL ANGLES. THIS RESOLVED THE PROBLEM. CAUSE OF EVENT REPORTED AS UNKNOWN. Manufacturer Narrat…
https://www.accessdata.fda.gov/scripts/cdrh/cfdocs/cfMAUDE/Detail.CFM?MDRFOI__ID=18387744&pc=MTA	2023826-2023-05773	2023-09-07 04:00:00	Injury	STAAR SURGICAL COMPANY	2023-12-22 05:00:00	MTA	IMPLANTABLE COLLAMER LENS (ICL)	Off-Label Use; Inadequacy of Device Shape and/or Size	Appropriate Clinical Signs, Symptoms, Conditions Term / Code Not Available	P030016	1	Event Description: THE REPORTER INDICATED THAT THE SURGEON IMPLANTED A 13.2MM VICMO13.2 IMPLANTABLE COLLAMER LENS OF DIOPTER -11.5 INTO THE PATIENT'S RIGHT EYE (OD) ON (B)(6) 2023. THE LENS WAS EXCHANGED ON 12-OCT-2023 FOR A SHORTER LENGTH LENS DUE TO EXCESSIVE VAULT AND SIGNIFICANT REDUCTION OF IRIDO-CORNEAL ANGLES. THIS RESOLVED THE PROBLEM. CAUSE OF EVENT REPORTED AS UNKNOWN. Manufacturer Narr…
https://www.accessdata.fda.gov/scripts/cdrh/cfdocs/cfMAUDE/Detail.CFM?MDRFOI__ID=18180097&pc=MTA	2023826-2023-05210	2023-09-18 04:00:00	Malfunction	STAAR SURGICAL COMPANY	2023-11-21 05:00:00	MTA	IMPLANTABLE COLLAMER LENS (ICL)	Off-Label Use; Inadequacy of Device Shape and/or Size	Appropriate Clinical Signs, Symptoms, Conditions Term / Code Not Available	P030016	1	Event Description: THE REPORTER INDICATED THAT THE SURGEON IMPLANTED A 13.2MM VICMO13.2 IMPLANTABLE COLLAMER LENS OF DIOPTER -6.5 INTO THE PATIENT'S RIGHT EYE (OD) ON (B)(6) 2023. WITHIN THE INITIAL SURGERY THE LENS WAS REMOVED AND REPLACED INTRA-OPERATIVELY FOR A SHORTER LENGTH LENS DUE TO EXCESSIVE VAULT. SIGNIFICANT REDUCTION OF IRIDO-CORNEAL ANGLES WAS ALSO NOTED. THE PROBLEM WAS RESOLVED. CA…
https://www.accessdata.fda.gov/scripts/cdrh/cfdocs/cfMAUDE/Detail.CFM?MDRFOI__ID=18248706&pc=MTA	2023826-2023-05409	2023-11-09 05:00:00	Injury	STAAR SURGICAL COMPANY	2023-12-01 05:00:00	MTA	IMPLANTABLE COLLAMER LENS (ICL)	Off-Label Use; Inadequacy of Device Shape and/or Size	Appropriate Clinical Signs, Symptoms, Conditions Term / Code Not Available	P030016	1	Event Description: THE REPORTER INDICATED THAT THE SURGEON IMPLANTED A 13.2MM VICMO13.2; -13 DIOPTER IMPLANTABLE COLLAMER LENS INTO THE PATIENT'S LEFT EYE (OS) ON (B)(6) 2023. THE PATIENT EXPERIENCED EXCESSIVE VAULTING AND SIGNIFICANT REDUCTION OF IRIDO-CORNEAL ANGLE. ON (B)(6) 2023 THE LENS WAS EXCHANGED WITH A SHORTER LENGTH LENS AND THIS RESOLVED THE PROBLEM. THE CAUSE OF THE EVENT WAS REPORTE…
https://www.accessdata.fda.gov/scripts/cdrh/cfdocs/cfMAUDE/Detail.CFM?MDRFOI__ID=17862020&pc=MTA	2023826-2023-04065	2023-08-17 04:00:00	Injury	STAAR SURGICAL COMPANY	2023-10-03 04:00:00	MTA	IMPLANTABLE COLLAMER LENS (ICL)	Off-Label Use; Inadequacy of Device Shape and/or Size; Device Dislodged or Dislocated; Adverse Event Without Identified Device or Use Problem	Appropriate Clinical Signs, Symptoms, Conditions Term / Code Not Available	P030016	1	Event Description: THE REPORTER INDICATED THAT A 13.7MM, VICM5 13.7, -11.50 DIOPTER, IMPLANTABLE COLLAMER LENS WAS IMPLANTED INTO THE PATIENT'S LEFT EYE (OS) ON (B)(6) 2023. EXCESSIVE VAULT, SIGNIFICANT REDUCTION OF IRIDO-CORNEAL ANGLES, LENS DISLOCATION, AND PIGMENT DISPERSION WAS OBSERVED. LENS REMAINS IMPLANTED. ADDITIONAL INFORMATION HAS BEEN REQUESTED BUT NONE HAS BEEN FORTHCOMING.Event Desc…
https://www.accessdata.fda.gov/scripts/cdrh/cfdocs/cfMAUDE/Detail.CFM?MDRFOI__ID=15272109&pc=MTA	2023826-2022-02875		Malfunction	STAAR SURGICAL COMPANY	2022-08-22 04:00:00	MTA	IMPLANTABLE COLLAMER LENS (ICL)	Off-Label Use; Inadequacy of Device Shape and/or Size; Patient-Device Incompatibility	Appropriate Clinical Signs, Symptoms, Conditions Term / Code Not Available		1	Event Description: THE REPORTER INDICATED THAT THE SURGEON IMPLANTED A 12.1MM VICH12.1; +4 DIOPTER IMPLANTABLE COLLAMER LENS INTO THE PATIENT'S LEFT EYE (OS) IN (B)(6) 2022. THE PATIENT EXPERIENCED EXCESSIVE VAULTING. INTRAOPERATIVELY THE LENS WAS REMOVED. THE CAUSE OF THE EVENT WAS REPORTED AS A PATIENT RELATED FACTOR AND NOTED "LENS TOO LONG. ICL PROLAPSED FORWARD WITH CORNEAL TOUCH". IT WAS IN…
https://www.accessdata.fda.gov/scripts/cdrh/cfdocs/cfMAUDE/Detail.CFM?MDRFOI__ID=18221440&pc=MTA	2023826-2023-05373		Injury	STAAR SURGICAL COMPANY	2023-11-28 05:00:00	MTA	IMPLANTABLE COLLAMER LENS (ICL)	Off-Label Use; No Apparent Adverse Event	Appropriate Clinical Signs, Symptoms, Conditions Term / Code Not Available	P030016	1	Event Description: AN ARTICLE WAS PUBLISHED IN THE INTERNATIONAL JOURNAL OPHTHALMOL TITLED, 'ACUTE MICRO-MACULAR HOLE ASSOCIATING WITH EXTENSIVE INTRAOPERATIVE ROTATION OF IMPLANTABLE COLLAMER LENS WITHOUT OPHTHALMIC VISCOSURGICAL DEVICE ASSISTANCE: A CASE REPORT'. THE ARTICLE REPORTS " A MICRO-MACULAR HOLE (MMH) FOLLOWING THE INTRAOPERATIVE ROTATION OF IMPLANTABLE COLLAMER LENS WITHOUT OPHTHALMI…
https://www.accessdata.fda.gov/scripts/cdrh/cfdocs/cfMAUDE/Detail.CFM?MDRFOI__ID=17054417&pc=MTA	2023826-2023-02176		Injury	STAAR SURGICAL COMPANY	2023-06-02 04:00:00	MTA	IMPLANTABLE COLLAMER LENS (ICL)	Optical Problem	Appropriate Clinical Signs, Symptoms, Conditions Term / Code Not Available	P030016	1	Event Description: THE REPORTER INDICATED THAT THE SURGEON IMPLANTED AN IMPLANTABLE COLLAMER LENS INTO THE PATIENT'S LEFT EYE (OS) ON (B)(6) 2023. THE SURGEON REPORTS THE PATIENT "APPEARS GREAT AND STABLE POSTOP COURSE WITH VISION 20/40 IN THE RIGHT AND 20/25 IN THE LEFT WITH RESIDUAL MYOPIA (EXPECTED). HIS VAULT IS ESTIMATED 1 TO 1.5 CCT DEPTHS. HE HAS UPDATED GLASSES WHICH HE USES AND WEARS THA…
https://www.accessdata.fda.gov/scripts/cdrh/cfdocs/cfMAUDE/Detail.CFM?MDRFOI__ID=17054419&pc=MTA	2023826-2023-02175		Injury	STAAR SURGICAL COMPANY	2023-06-02 04:00:00	MTA	IMPLANTABLE COLLAMER LENS (ICL)	Optical Problem	Appropriate Clinical Signs, Symptoms, Conditions Term / Code Not Available	P030016	1	Event Description: THE REPORTER INDICATED THAT THE SURGEON IMPLANTED AN IMPLANTABLE COLLAMER LENS INTO THE PATIENT'S RIGHT EYE (OD) IN (B)(6) 2023. THE SURGEON REPORTS THE PATIENT "APPEARS GREAT AND STABLE POSTOP COURSE WITH VISION 20/40 IN THE RIGHT AND 20/25 IN THE LEFT WITH RESIDUAL MYOPIA (EXPECTED). HIS VAULT IS ESTIMATED 1 TO 1.5 CCT DEPTHS. HE HAS UPDATED GLASSES WHICH HE USES AND WEARS TH…
https://www.accessdata.fda.gov/scripts/cdrh/cfdocs/cfMAUDE/Detail.CFM?MDRFOI__ID=13052015&pc=MTA	8040449-2021-00004		Injury	OPHTEC BV	2021-12-21 05:00:00	MTA	VERISYSE MYOPIA	Output Problem	Appropriate Clinical Signs, Symptoms, Conditions Term / Code Not Available	P030028	1	Event Description: PATIENT'S IOL WAS EXPLANTED, SINCE IT WAS CAUSING THE RIGHT EYE'S CELL CONE TO DIMINISH. IOL INFORMATION: VERISYSE MYOPIA IOL 6/8.5, DIOPTER -6.0, SERIAL NUMBER (B)(4).
https://www.accessdata.fda.gov/scripts/cdrh/cfdocs/cfMAUDE/Detail.CFM?MDRFOI__ID=11065550&pc=MTA	2023826-2020-03086	2020-11-24	Malfunction	STAAR SURGICAL COMPANY	2020-12-23	MTA	IMPLANTABLE COLLAMER LENS (ICL)	Patient-Device Incompatibility	Appropriate Clinical Signs, Symptoms, Conditions Term / Code Not Available	N/A	1	Event Description: THE REPORTER INDICATED THAT THE SURGEON IMPLANTED A 12.1MM VICM5_12.1, -07.00 DIOPTER, IMPLANTABLE COLLAMER LENS, INTO THE PATIENT'S LEFT EYE (OS) ON (B)(6) 2020. SIGNIFICANT REDUCTION OF ENDOTHELIAL CELL COUNT OR SIGNIFICANT ENDOTHELIAL CELL LOSS WAS OBSERVED. SPECULAR MICROSCOPY DIAGNOSTICES PERFORMED. NO TREATMENT PERFORMED. LENS REMAINS IMPLANTED. CAUSE OF THE EVENT IS REPO…
https://www.accessdata.fda.gov/scripts/cdrh/cfdocs/cfMAUDE/Detail.CFM?MDRFOI__ID=17493392&pc=MTA	2023826-2023-03434	2023-06-26 04:00:00	Injury	STAAR SURGICAL COMPANY	2023-08-09 04:00:00	MTA	IMPLANTABLE COLLAMER LENS (ICL)	Patient-Device Incompatibility	Appropriate Clinical Signs, Symptoms, Conditions Term / Code Not Available	P030016	1	Event Description: THE REPORTER INDICATED THAT A 13.2MM VICMO 13.2 IMPLANTABLE COLLAMER LENS OF -12.0 DIOPTER WAS IMPLANTED INTO THE PATIENT'S RIGHT EYE (OD) ON (B)(6) 2023. ON (B)(6) 2023 THE LENS WAS REMOVED DUE TO PATIENT SUFFERING FROM PSYCHOLOGICAL ANXIETY, COULD NOT SLEEP, AND SUFFERED FROM SEVERE NEURASTHENIA. REPORTEDLY AFTER THE ICL LENS IMPLANTATION, THE PATIENT HAD A FOREIGN OBJECT IN …
https://www.accessdata.fda.gov/scripts/cdrh/cfdocs/cfMAUDE/Detail.CFM?MDRFOI__ID=15280270&pc=MTA	2023826-2022-02877		Injury	STAAR SURGICAL COMPANY	2022-08-23 04:00:00	MTA	IMPLANTABLE COLLAMER LENS (ICL)	Patient-Device Incompatibility; No Apparent Adverse Event	Appropriate Clinical Signs, Symptoms, Conditions Term / Code Not Available		1	Event Description: REPORTEDLY, "A PATIENT... WHO RECENTLY HAD SURGERY; EVO ICL WITH GREAT RESULTS. PATIENT NOW HAS A NON-REACTIVE PUPIL OD AFTER NORMAL CONSTRICTION UP TO 2 WEEKS POST-OP. VAULTS ARE GOOD, OS UNREMARKABLE. PILOCARPINE NOT CONSTRICTING PUPIL." Manufacturer Narrative: COMMON DEVICE NAME: CANNOT BE LEFT BLANK DUE TO UNKNOWN SERIAL NUMBER. CLAIM#: (B)(4). Manufacturer Narrative: H6: H…
https://www.accessdata.fda.gov/scripts/cdrh/cfdocs/cfMAUDE/Detail.CFM?MDRFOI__ID=13023012&pc=MTA	2023826-2021-04905	2021-10-22 04:00:00	Injury	STAAR SURGICAL COMPANY	2021-12-16 05:00:00	MTA	IMPLANTABLE COLLAMER LENS (ICL)	Unintended Movement	Appropriate Clinical Signs, Symptoms, Conditions Term / Code Not Available		1	Event Description: THE REPORTER INDICATED THAT THE SURGEON IMPLANTED A 13.2MM VICMO13.2; -11.0 DIOPTER IMPLANTABLE COLLAMER LENS INTO THE PATIENT'S LEFT EYE (OS) ON (B)(6) 2021. THE LENS WAS IMPLANTED UPSIDE DOWN. INTRAOPERATIVELY THE LENS WAS REMOVED AND THERE WAS PATIENT INJURY. DURING THE LENS REMOVAL THE LENS HAD RUPTURED AND DAMAGED THE CORNEAL ENDOTHELIUM AND IT WAS ALSO REPORTED THE PATIEN…
https://www.accessdata.fda.gov/scripts/cdrh/cfdocs/cfMAUDE/Detail.CFM?MDRFOI__ID=15828414&pc=MTA	2023826-2022-04012		Malfunction	STAAR SURGICAL COMPANY	2022-11-18 05:00:00	MTA	IMPLANTABLE COLLAMER LENS (ICL)	Unintended Movement	Appropriate Clinical Signs, Symptoms, Conditions Term / Code Not Available		1	Event Description: AN ARTICLE WAS PUBLISHED IN THE ALFONSO BARTOLOZZI ET AL. EYE AND VISION ON (B)(6) 2022 ENTITLED, 'THREE YEAR FOLLOW UP OF POSTERIOR CHAMBER PHAKIC INTRAOCULAR LENS WITH A CENTRAL PORT DESIGN AFTER DEEP ANTERIOR LAMELLAR KERATOPLASTY'. THE ARTICLE REPORTS ADVERSE EVENTS FOLLOWING ICL IMPLANTATION. IN ONE EYE THE ICL WAS ROTATED BETWEEN THE 6- AND 12-MONTH FOLLOW-UP VISITS. THIS…
https://www.accessdata.fda.gov/scripts/cdrh/cfdocs/cfMAUDE/Detail.CFM?MDRFOI__ID=15316755&pc=MTA	2023826-2022-02956	2022-07-21 04:00:00	Injury	STAAR SURGICAL COMPANY	2022-08-29 04:00:00	MTA	IMPLANTABLE COLLAMER LENS (ICL)	Adverse Event Without Identified Device or Use Problem	Appropriate Clinical Signs, Symptoms, Conditions Term / Code Not Available; No Clinical Signs, Symptoms or Conditions	P030016	1	Event Description: THE REPORTER INDICATED THAT A 13.2MM VICM5_13.2; -07.00 DIOPTER IMPLANTABLE COLLAMER LENS WAS IMPLANTED INTO A PATIENT'S EYE. IT WAS REPORTED THAT THE LENS WAS EXPLANTED. ATTEMPTS TO OBTAIN ADDITIONAL INFORMATION HAVE NOT BEEN SUCCESSFUL. IF ADDITIONAL INFORMATION IS RECEIVED A SUPPLEMENTAL MEDWATCH REPORT WILL BE SUBMITTED. Manufacturer Narrative: TYPE OF INVESTIGATION: LENS W…
https://www.accessdata.fda.gov/scripts/cdrh/cfdocs/cfMAUDE/Detail.CFM?MDRFOI__ID=12973019&pc=MTA	2023826-2021-04657		Injury	STAAR SURGICAL COMPANY	2021-12-09 05:00:00	MTA	IMPLANTABLE COLLAMER LENS (ICL)	Adverse Event Without Identified Device or Use Problem; No Apparent Adverse Event	Appropriate Clinical Signs, Symptoms, Conditions Term / Code Not Available; No Clinical Signs, Symptoms or Conditions	NA	1	Event Description: THE REPORTER INDICATED THE SURGEON IMPLANTED AN ICL IMPLANTABLE COLLAMER LENS INTO ONE OF HIS PATIENTS AND HAS NOW REPORTED A PROBLEM. ADDITIONAL INFORMATION HAS BEEN REQUESTED BUT NONE HAS BEEN FORTHCOMING. Manufacturer Narrative: THIS PRODUCT IS MANUFACTURED IN THE U.S. BUT NOT MARKETED IN THE U.S. CLAIM # (B)(4). Manufacturer Narrative: B5: THE REPORTER INDICATED THE PATIENT…
https://www.accessdata.fda.gov/scripts/cdrh/cfdocs/cfMAUDE/Detail.CFM?MDRFOI__ID=16147830&pc=MTA	2023826-2023-00059		Malfunction	STAAR SURGICAL COMPANY	2023-01-12 05:00:00	MTA	IMPLANTABLE COLLAMER LENS (ICL)	Adverse Event Without Identified Device or Use Problem; No Apparent Adverse Event	Appropriate Clinical Signs, Symptoms, Conditions Term / Code Not Available; No Clinical Signs, Symptoms or Conditions		1	Event Description: IN THE ARTICLE, "RETAINED PRESUMED INTRAOCULAR COTTON FIBER AFTER IMPLANTABLE COLLEMER LENS IMPLANTATION: A CASE REPORT," THE STUDY OBSERVES A PATIENT WITH A THREAD BEHIND AN IMPLANTED ICL. REPORTEDLY, "A TINY WHITE THREAD WAS ATTACHED TO THE POSTERIOR SURFACE OF THE ICL WITH NO CATARACTOUS CHANGES. UPON DISCHARGE, THE PATIENT WAS PRESCRIBED. MOXIFLOXACIN 0.5% 4 TIMES DAILY FOR…
https://www.accessdata.fda.gov/scripts/cdrh/cfdocs/cfMAUDE/Detail.CFM?MDRFOI__ID=17393776&pc=MTA	2023826-2023-03126		Injury	STAAR SURGICAL COMPANY	2023-07-25 04:00:00	MTA	IMPLANTABLE COLLAMER LENS (ICL)	Adverse Event Without Identified Device or Use Problem; No Apparent Adverse Event	Appropriate Clinical Signs, Symptoms, Conditions Term / Code Not Available; No Clinical Signs, Symptoms or Conditions	UNK	1	Event Description: THE REPORTER INDICATED THAT AN IMPLANTABLE COLLAMER LENS WAS IMPLANTED INTO THE PATIENT'S EYE. REPORTEDLY, "DOUBLE FENESTRATION IN AN EVO ICL." THIS WAS NOTED ONE-DAY POST-OP. Manufacturer Narrative: A4-A6:UNK. B3: UNK D4 (EXPERIATION DATE); UNK NO SERIAL NUMBER REPORTED. D6A: UNK H4 (DEVICE MANUFACTURING DATE): NO SERIAL NUMBER REPORTED. CLAIM# (B)(4). Manufacturer Narrative: …
https://www.accessdata.fda.gov/scripts/cdrh/cfdocs/cfMAUDE/Detail.CFM?MDRFOI__ID=18258206&pc=MTA	2023826-2023-05307		Injury	STAAR SURGICAL COMPANY	2023-12-04 05:00:00	MTA	IMPLANTABLE COLLAMER LENS (ICL)	Adverse Event Without Identified Device or Use Problem; No Apparent Adverse Event	Appropriate Clinical Signs, Symptoms, Conditions Term / Code Not Available; No Clinical Signs, Symptoms or Conditions		1	Event Description: THE REPORTER INDICATED THAT AN IMPLANTABLE COLLAMER LENS WAS IMPLANTED. AC SHALLOWING, IRIS BOWING, AND PIGMENT ON THE ANTERIROR SURGFACE OF THE LENS WAS OBSERVED. LENS REMAINS IMPLANTED. REPORTEDLY IOP IS NORMAL. ADDITIONAL INFORMATION HAS BEEN REQUESTED BUT NONE HAS BEEN FORTHCOMING. Manufacturer Narrative: A1 - UNK. A2 - UNK. A3 - UNK. A4 - UNK. A5 - UNK. A6 - UNK. B3 - UNK.…
https://www.accessdata.fda.gov/scripts/cdrh/cfdocs/cfMAUDE/Detail.CFM?MDRFOI__ID=18258208&pc=MTA	2023826-2023-05308		Injury	STAAR SURGICAL COMPANY	2023-12-04 05:00:00	MTA	IMPLANTABLE COLLAMER LENS (ICL)	Adverse Event Without Identified Device or Use Problem; No Apparent Adverse Event	Appropriate Clinical Signs, Symptoms, Conditions Term / Code Not Available; No Clinical Signs, Symptoms or Conditions		1	Event Description: THE REPORTER INDICATED THAT AN IMPLANTABLE COLLAMER LENS WAS IMPLANTED. AC SHALLOWING, IRIS BOWING, AND PIGMENT ON THE ANTERIROR SURGFACE OF THE LENS WAS OBSERVED. LENS REMAINS IMPLANTED. REPORTEDLY IOP IS NORMAL. ADDITIONAL INFORMATION HAS BEEN REQUESTED BUT NONE HAS BEEN FORTHCOMING. Manufacturer Narrative: A1 - UNK A2 - UNK A3 - UNK A4 - UNK A5 - UNK A6 - UNK B3 - UNK D2 - P…
https://www.accessdata.fda.gov/scripts/cdrh/cfdocs/cfMAUDE/Detail.CFM?MDRFOI__ID=16873135&pc=MTA	2023826-2023-01664	2023-04-12 04:00:00	Injury	STAAR SURGICAL COMPANY	2023-05-04 04:00:00	MTA	IMPLANTABLE COLLAMER LENS (ICL)	Device Dislodged or Dislocated; Patient Device Interaction Problem	Appropriate Clinical Signs, Symptoms, Conditions Term / Code Not Available; No Clinical Signs, Symptoms or Conditions	P030016	1	Event Description: THE REPORTER INDICATED THAT THE SURGEON IMPLANTED AN IMPLANTED COLLAMER LENS INTO THE PATIENT'S EYE ON (B)(6) 2023. IT WAS INDICATED THAT THE LENS WAS DISPLACED THROUGH THE PUPIL. LENS REMAINS IMPLANTED. ATTEMPTS TO OBTAIN ADDITIONAL INFORMATION HAVE NOT BEEN SUCCESSFUL. IF ADDITIONAL INFORMATION IS RECEIVED A SUPPLEMENTAL MEDWATCH REPORT WILL BE SUBMITTED. Manufacturer Narrati…
https://www.accessdata.fda.gov/scripts/cdrh/cfdocs/cfMAUDE/Detail.CFM?MDRFOI__ID=10881155&pc=MTA	2023826-2020-02757	2020-01-15 05:00:00	Injury	STAAR SUGICAL COMPANY	2020-11-21 05:00:00	MTA	IMPLANTABLE COLLAMER LENS (ICL)	Inadequacy of Device Shape and/or Size	Appropriate Clinical Signs, Symptoms, Conditions Term / Code Not Available; No Clinical Signs, Symptoms or Conditions	NA	1	Event Description: THE REPORTER INDICATED "INITIAL LENS 13.2 WAS OVERSIZED AND THE EDGES MAY HAVE INCISED THE CAPSULE." LENS WAS REMOVED AND REPLACED WITH A SHORTER LENGTH LENS WITHIN THE SAME SITTING. IF ADDITIONAL INFORMATION IS RECEIVED A SUPPLEMENTAL MEDWATCH REPORT WILL BE SUBMITTED. Manufacturer Narrative: CORRECTED DATA: H6 - HEALTH EFFECT CLINICAL CODE: 4581 - CAPSULAR TEAR, SHOULD HAVE B…
https://www.accessdata.fda.gov/scripts/cdrh/cfdocs/cfMAUDE/Detail.CFM?MDRFOI__ID=12862895&pc=MTA	2023826-2021-04280	2020-10-26 04:00:00	Injury	STAAR SURGICAL COMPANY	2021-11-23 05:00:00	MTA	IMPLANTABLE COLLAMER LENS (ICL)	Inadequacy of Device Shape and/or Size	Appropriate Clinical Signs, Symptoms, Conditions Term / Code Not Available; No Clinical Signs, Symptoms or Conditions		1	Event Description: THE REPORTER INDICATED THAT THE SURGEON IMPLANTED A 13.2MM VICM_13.2; -12.00 DIOPTER IMPLANTABLE COLLAMER LENS INTO THE PATIENT'S LEFT EYE (OS) ON (B)(6) 2020. ON (B)(6) 2020 THE LENS WAS EXCHANGED WITH A SHORTER LENGTH LENS DUE TO EXCESSIVE VAULTING AND SIGNIFICANT REDUCTION OF IRIDO-CORNEAL ANGLES. THIS RESOLVED THE PROBLEM. THE CAUSE OF THE EVENT WAS REPORTED AS THE DEVICE. …
https://www.accessdata.fda.gov/scripts/cdrh/cfdocs/cfMAUDE/Detail.CFM?MDRFOI__ID=12411351&pc=MTA	2023826-2021-03461	2021-08-05 04:00:00	Malfunction	STAAR SURGICAL COMPANY	2021-09-01 04:00:00	MTA	IMPLANTABLE COLLAMER LENS (ICL)	Inadequacy of Device Shape and/or Size	Appropriate Clinical Signs, Symptoms, Conditions Term / Code Not Available; No Clinical Signs, Symptoms or Conditions		1	Event Description: THE REPORTER INDICATED THAT THE SURGEON IMPLANTED A 12.6MM VICMO12.6; -5.5 DIOPTER IMPLANTABLE COLLAMER LENS INTO THE PATIENT'S LEFT EYE (OS) ON (B)(6) 2021. INTRAOPERATIVELY THE LENS WAS REMOVED AND REPLACED WITH A LONGER LENGTH LENS DUE TO LOW VAULTING. THIS RESOLVED THE PROBLEM. THE CAUSE OF THE EVENT WAS REPORTED AS UNKNOWN. Manufacturer Narrative: CORRECTED DATA: B5 - IT W…
https://www.accessdata.fda.gov/scripts/cdrh/cfdocs/cfMAUDE/Detail.CFM?MDRFOI__ID=15118195&pc=MTA	2023826-2022-02411	2021-09-27 04:00:00	Injury	STAAR SURGICAL COMPANY	2022-07-27 04:00:00	MTA	IMPLANTABLE COLLAMER LENS (ICL)	Inadequacy of Device Shape and/or Size	Appropriate Clinical Signs, Symptoms, Conditions Term / Code Not Available; No Clinical Signs, Symptoms or Conditions	P030016	1	Event Description: THE REPORTER INDICATED THAT A 13.2MM VICMO13.2 IMPLANTABLE COLLAMER LENS OF -6.5 DIOPTER WAS IMPLANTED INTO THE PATIENT'S LEFT EYE (OS) ON (B)(6) 2021. ON (B)(6) 2022, THE LENS WAS EXCHANGED FOR A SHORTER LENGTH LENS DUE TO EXCESSIVE VAULT AND SIGNIFICANT REDUCTION OF IRIDO-CORNEAL ANGLES. THE PROBLEM WAS RESOLVED. CAUSE REPORTED AS UNKNOWN. Manufacturer Narrative: H6: CLINICAL…
https://www.accessdata.fda.gov/scripts/cdrh/cfdocs/cfMAUDE/Detail.CFM?MDRFOI__ID=12741579&pc=MTA	2023826-2021-04220	2021-10-02	Injury	STAAR SURGICAL COMPANY	2021-11-02	MTA	IMPLANTABLE COLLAMER LENS (ICL)	Inadequacy of Device Shape and/or Size	Appropriate Clinical Signs, Symptoms, Conditions Term / Code Not Available; No Clinical Signs, Symptoms or Conditions		1	Event Description: THE REPORTER INDICATED THAT THE SURGEON IMPLANTED A 12.6MM VICMO12.6; -5.0 DIOPTER IMPLANTABLE COLLAMER LENS INTO THE PATIENT'S RIGHT EYE (OD) ON (B)(6) 2021. ON (B)(6) 2021 THE LENS WAS EXCHANGED WITH A SHORTER LENGTH LENS DUE TO EXCESSIVE VAULTING AND SIGNIFICANT REDUCTION OF IRIDO-CORNEAL ANGLES. THIS RESOLVED THE PROBLEM. THE CAUSE OF THE EVENT WAS REPORTED AS UNKNOWN. Manu…
https://www.accessdata.fda.gov/scripts/cdrh/cfdocs/cfMAUDE/Detail.CFM?MDRFOI__ID=13122991&pc=MTA	2023826-2021-04777	2021-10-02 04:00:00	Injury	STAAR SURGICAL COMPANY	2021-12-30 05:00:00	MTA	IMPLANTABLE COLLAMER LENS (ICL)	Inadequacy of Device Shape and/or Size	Appropriate Clinical Signs, Symptoms, Conditions Term / Code Not Available; No Clinical Signs, Symptoms or Conditions	NA	1	Event Description: THE REPORTER INDICATED THAT A 12.6MM VICMO 12.6 IMPLANTABLE COLLAMER LENS OF -5.5 DIOPTER INTO THE PATIENTS LEFT EYE (OS) ON (B)(6) 2021. ON (B)(6) 2021 THE LENS WAS EXCHANGED FOR A SHORTER LENGTH LENS DUE TO EXCESSIVE VAULT. THE EXCHANGE RESOLVED THE PROBLEM. CAUSE IS REPORTED AS UNKNOWN. Manufacturer Narrative: THIS PRODUCT IS NOT MARKETED IN THE US. (B)(4). Manufacturer Narr…
https://www.accessdata.fda.gov/scripts/cdrh/cfdocs/cfMAUDE/Detail.CFM?MDRFOI__ID=13256293&pc=MTA	2023826-2022-00137	2021-11-23 05:00:00	Injury	STAAR SURGICAL COMPANY	2022-01-13 05:00:00	MTA	IMPLANTABLE COLLAMER LENS	Inadequacy of Device Shape and/or Size	Appropriate Clinical Signs, Symptoms, Conditions Term / Code Not Available; No Clinical Signs, Symptoms or Conditions	P030016	1	Event Description: THE REPORTER STATES AN IMPLANTABLE COLLAMER LENS WAS IMPLANTED INTO THE PATIENT'S LEFT (OS) EYE. THE SURGEON REPORTS EXCESSIVE VAULT. ATTEMPTS TO OBTAIN ADDITIONAL INFORMATION HAVE NOT BEEN SUCCESSFUL. Manufacturer Narrative: B5-ADDITIONAL INFORMATION: A 13.7MM MICL13.7, -13.0 DIOPTER LENS WAS IMPLANTED INTO THE PATIENT'S EYE ON (B)(6) 2021. ON (B)(6) 2021 THE LENS WAS EXCHANGE…
https://www.accessdata.fda.gov/scripts/cdrh/cfdocs/cfMAUDE/Detail.CFM?MDRFOI__ID=15952754&pc=MTA	2023826-2022-04351	2022-11-04 04:00:00	Injury	STAAR SURGICAL COMPANY	2022-12-09 05:00:00	MTA	IMPLANTABLE COLLAMER LENS (ICL)	Inadequacy of Device Shape and/or Size	Appropriate Clinical Signs, Symptoms, Conditions Term / Code Not Available; No Clinical Signs, Symptoms or Conditions	P030016	1	Event Description: THE REPORTER INDICATED THE SURGEON IMPLANTED AND REMOVED A 13.2MM VICM5_13.2 IMPLANTABLE COLLAMER LENS, -11.50 DIOPTER, FROM THE PATIENTS RIGHT EYE (OD) DUE TO THE BIG SIZE OF THE LENS. THE LENS WAS REPLACED WITH A SMALLER SIZE LENS. ADDITIONAL INFORMATION HAS BEEN REQUESTED BUT NONE HAS BEEN FORTHCOMING. Manufacturer Narrative: ADDITIONAL DATA: H6: HEALTH IMPACT- CLINICAL CODE…
https://www.accessdata.fda.gov/scripts/cdrh/cfdocs/cfMAUDE/Detail.CFM?MDRFOI__ID=17195743&pc=MTA	2023826-2023-02534	2023-03-08 05:00:00	Injury	STAAR SURGICAL COMPANY	2023-06-23 04:00:00	MTA	IMPLANTABLE COLLAMER LENS (ICL)	Inadequacy of Device Shape and/or Size	Appropriate Clinical Signs, Symptoms, Conditions Term / Code Not Available; No Clinical Signs, Symptoms or Conditions	P030016	1	Event Description: THE REPORTER INDICATED THAT THE SURGEON IMPLANTED A 12.6MM VICM5_12.6 IMPLANTABLE COLLAMER LENS OF DIOPTER -9.5 INTO THE PATIENT'S RIGHT EYE (OD) ON (B)(6) 2023. EXCESSIVE VAULT AND SIGNIFICANT REDUCTION OF IRIDO-CORNEAL ANGLES WERE NOTED. THE LENS WAS REMOVED ON (B)(6) 2023 AND A SHORTER LENGTH LENS WAS IMPLANTED ON (B)(6) 2023. THE PROBLEM WAS RESOLVED. CAUSE OF THE EVENT WAS…
https://www.accessdata.fda.gov/scripts/cdrh/cfdocs/cfMAUDE/Detail.CFM?MDRFOI__ID=18036041&pc=MTA	2023826-2023-04894	2023-04-23 04:00:00	Injury	STAAR SURGICAL COMPANY	2023-10-30 04:00:00	MTA	IMPLANTABLE COLLAMER LENS (ICL)	Inadequacy of Device Shape and/or Size	Appropriate Clinical Signs, Symptoms, Conditions Term / Code Not Available; No Clinical Signs, Symptoms or Conditions	P030016	1	Event Description: THE REPORTER INDICATED THAT THE SURGEON IMPLANTED A 12.6MM VICMO 12.6 IMPLANTABLE COLLAMER LENS OF DIOPTER -5.0 INTO THE PATIENT'S RIGHT EYE (OD) ON (B)(6) 2022. ON (B)(6) 2023 THE LENS WAS EXCHANGED FOR A SHORTER LENGTH LENS DUE TO EXCESSIVE VAULT AND SIGNIFICANT REDUCTION OF IRIDO-CORNEAL ANGLES. THE PROBLEM WAS RESOLVED. THE CAUSE OF THE EVENT WAS REPORTED AS UNKNOWN. Manufa…
https://www.accessdata.fda.gov/scripts/cdrh/cfdocs/cfMAUDE/Detail.CFM?MDRFOI__ID=17056304&pc=MTA	2023826-2023-02129	2023-05-10 04:00:00	Malfunction	STAAR SURGICAL COMPANY	2023-06-02 04:00:00	MTA	IMPLANTABLE COLLAMER LENS (ICL)	Inadequacy of Device Shape and/or Size	Appropriate Clinical Signs, Symptoms, Conditions Term / Code Not Available; No Clinical Signs, Symptoms or Conditions	UNK	1	Event Description: THE REPORTER INDICATED THAT AN IMPLANTABLE COLLAMER LENS WAS IMPLANTED INTO THE PATIENT'S RIGHT EYE (OD). LOW VAULT WAS OBSERVED. Manufacturer Narrative: B5: THE REPORTER INDICATED THAT THE SURGEON IMPLANTED A 13.2MM VTICMO13.2 IMPLANTABLE COLLAMER LENS OF DIOPTER -10.0/1.0/053 (SPHERE/CYLINDER/AXIS) INTO THE PATIENT'S RIGHT EYE (OD) ON (B)(6) 2016. LOW VAULT WAS OBSERVED. PATI…
https://www.accessdata.fda.gov/scripts/cdrh/cfdocs/cfMAUDE/Detail.CFM?MDRFOI__ID=17056429&pc=MTA	2023826-2023-02130	2023-05-10 04:00:00	Malfunction	STAAR SURGICAL COMPANY	2023-06-02 04:00:00	MTA	IMPLANTABLE COLLAMER LENS (ICL)	Inadequacy of Device Shape and/or Size	Appropriate Clinical Signs, Symptoms, Conditions Term / Code Not Available; No Clinical Signs, Symptoms or Conditions	UNK	1	Event Description: THE REPORTER INDICATED THAT AN IMPLANTABLE COLLAMER LENS WAS IMPLANTED INTO THE PATIENT'S LEFT EYE (OS). LOW VAULT WAS OBSERVED. Manufacturer Narrative: B5: THE REPORTER INDICATED THAT THE SURGEON IMPLANTED A 13.2MM VICMO13.2 IMPLANTABLE COLLAMER LENS OF DIOPTER -10.0 INTO THE PATIENT'S LEFT EYE (OS) ON (B)(6) 2016. LOW VAULT WAS OBSERVED. PATIENT EXPERIENCED REFRACTIVE CHANGE …
https://www.accessdata.fda.gov/scripts/cdrh/cfdocs/cfMAUDE/Detail.CFM?MDRFOI__ID=17131350&pc=MTA	2023826-2023-02394	2023-07-26 04:00:00	Injury	STAAR SURGICAL COMPANY	2023-06-14 04:00:00	MTA	IMPLANTABLE COLLAMER LENS (ICL)	Inadequacy of Device Shape and/or Size	Appropriate Clinical Signs, Symptoms, Conditions Term / Code Not Available; No Clinical Signs, Symptoms or Conditions	P030016	1	Event Description: THE REPORTER INDICATED THAT THE SURGEON IMPLANTED A 13.2MM VICM5_13.2; -13.50 DIOPTER IMPLANTABLE COLLAMER LENS INTO THE PATIENT'S RIGHT EYE (OD) ON (B)(6) 2023. THE PATIENT EXPERIENCED EXCESSIVE VAULTING. THE SURGEON REPOSITIONED THE LENS ON (B)(6) 2023 AND THIS RESOLVED THE PROBLEM. IT WAS ADDITIONALLY NOTED "THE DOCTOR ROTATED THE LENS 90 DEGREES VAULT IS OK". THE CAUSE OF T…
https://www.accessdata.fda.gov/scripts/cdrh/cfdocs/cfMAUDE/Detail.CFM?MDRFOI__ID=18036034&pc=MTA	2023826-2023-04841	2023-10-14 04:00:00	Injury	STAAR SURGICAL COMPANY	2023-10-30 04:00:00	MTA	IMPLANTABLE COLLAMER LENS (ICL)	Inadequacy of Device Shape and/or Size	Appropriate Clinical Signs, Symptoms, Conditions Term / Code Not Available; No Clinical Signs, Symptoms or Conditions	P030016	1	Event Description: THE REPORTER INDICATED THAT THE SURGEON IMPLANTED A 13.2MM VICMO 13.2 IMPLANTABLE COLLAMER LENS OF DIOPTER -4.0 INTO THE PATIENT'S RIGHT EYE (OD) ON (B)(6) 2023. ON (B)(6) 2023 THE LENS WAS EXCHANGED FOR A SHORTER LENGTH LENS DUE TO EXCESSIVE VAULT AND SIGNIFICANT REDUCTION OF IRIDO-CORNEAL ANGLES. THE PROBLEM WAS RESOLVED. THE CAUSE OF THE EVENT WAS REPORTED AS UNKNOWN. Manufa…
https://www.accessdata.fda.gov/scripts/cdrh/cfdocs/cfMAUDE/Detail.CFM?MDRFOI__ID=18036037&pc=MTA	2023826-2023-04842	2023-10-14 04:00:00	Injury	STAAR SURGICAL COMPANY	2023-10-30 04:00:00	MTA	IMPLANTABLE COLLAMER LENS (ICL)	Inadequacy of Device Shape and/or Size	Appropriate Clinical Signs, Symptoms, Conditions Term / Code Not Available; No Clinical Signs, Symptoms or Conditions	P030016	1	Event Description: THE REPORTER INDICATED THAT THE SURGEON IMPLANTED A 13.2MM VICMO 13.2 IMPLANTABLE COLLAMER LENS OF DIOPTER -3.5 INTO THE PATIENT'S LEFT EYE (OS) ON (B)(6) 2023. ON (B)(6) 2023 THE LENS WAS EXCHANGED FOR A SHORTER LENGTH LENS DUE TO EXCESSIVE VAULT AND SIGNIFICANT REDUCTION OF IRIDO-CORNEAL ANGLES. THE PROBLEM WAS RESOLVED. THE CAUSE OF THE EVENT WAS REPORTED AS UNKNOWN. Manufac…
https://www.accessdata.fda.gov/scripts/cdrh/cfdocs/cfMAUDE/Detail.CFM?MDRFOI__ID=13670775&pc=MTA	2023826-2022-00614		Injury	STAAR SURGICAL COMPANY	2022-03-04 05:00:00	MTA	IMPLANTABLE COLLAMER LENS (ICL)	Inadequacy of Device Shape and/or Size	Appropriate Clinical Signs, Symptoms, Conditions Term / Code Not Available; No Clinical Signs, Symptoms or Conditions	NA	1	Event Description: THE REPORTER INDICATED THAT A 13.2MM VICM5_13.2 IMPLANTABLE COLLAMER LENS OF -12.0 DIOPTER WAS IMPLANTED INTO THE PATIENT'S RIGHT EYE (OD) ON (B)(6) 2021. ON (B)(6) 2022 THE LENS WAS EXCHANGED WITH A SHORTER LENGTH LENS DUE TO EXCESSIVE VAULT AND SIGNIFICANT REDUCTION OF IRIDO-CORNEAL ANGELS. THIS RESOLVED THE PROBLEM. CAUSE IS REPORTED AS UNKNOWN. Manufacturer Narrative: WEIGH…
https://www.accessdata.fda.gov/scripts/cdrh/cfdocs/cfMAUDE/Detail.CFM?MDRFOI__ID=15686336&pc=MTA	2023826-2022-03835		Malfunction	STAAR SURGICAL COMPANY	2022-10-27 04:00:00	MTA	IMPLANTABLE COLLAMER LENS (ICL)	Inadequacy of Device Shape and/or Size	Appropriate Clinical Signs, Symptoms, Conditions Term / Code Not Available; No Clinical Signs, Symptoms or Conditions		1	Event Description: THE REPORTER INDICATED THAT AN IMPLANTABLE COLLAMER LENS WAS IMPLANTED INTO A PATIENT. EXCESSIVE VAULT, PIGMENT DISPERSION, SHALLOW CHAMBER, AND VERY SHALLOW ANGLE WAS OBSERVED. Manufacturer Narrative: CLAIM#: (B)(4). Manufacturer Narrative: ADDITIONAL INFORMATION: H6: HEALTH EFFECT-CLINICAL CODE: 4581 ADDED FOR ANGLE CLOSURE. CORRECTED DATA: DEVICE CODE 2199 SHOULD BE OMITTED …
https://www.accessdata.fda.gov/scripts/cdrh/cfdocs/cfMAUDE/Detail.CFM?MDRFOI__ID=16678123&pc=MTA	2023826-2023-01162		Injury	STAAR SURGICAL COMPANY	2023-04-04 04:00:00	MTA	IMPLANTABLE COLLAMER LENS (ICL)	Inadequacy of Device Shape and/or Size	Appropriate Clinical Signs, Symptoms, Conditions Term / Code Not Available; No Clinical Signs, Symptoms or Conditions	P030016	1	Event Description: THE REPORTER INDICATED THE SURGEON IMPLANTED AN EVO ICL IMPLANTABLE COLANDER LENS, INTO THEIR EYE. THE REPORTER INDICATED THE LENS WAS TOO LARGE AND THEIR IRIS NO LONGER CONSTRICTED ADEQUATELY FOR LIGHT CONDITIONS, LEAVING THE REPORTER WITH LESS THAN IDEAL VISION. THE REPORTER USED EYE DROPS WHICH HELPED BUT PROVED TO NOT BE A LONGER TERM SOLUTION. THE REPORTER WOULD LIKE THE L…
https://www.accessdata.fda.gov/scripts/cdrh/cfdocs/cfMAUDE/Detail.CFM?MDRFOI__ID=18183647&pc=MTA	2023826-2023-05219		Injury	STAAR SURGICAL COMPANY	2023-11-21 05:00:00	MTA	IMPLANTABLE COLLAMER LENS (ICL)	Inadequacy of Device Shape and/or Size	Appropriate Clinical Signs, Symptoms, Conditions Term / Code Not Available; No Clinical Signs, Symptoms or Conditions	P030016	1	Event Description: AN CASE REPORT WAS PUBLISHED IN INT OPHTHALMOL IN THE YEAR 2017; TITLED: "VERTICAL IMPLANTABLE COLLAMER LENS (ICL) ROTATION FOR THE MANAGEMENT OF HIGH VAULT DUE TO LENS OVERSIZING." IT REPORTS AN EXCESSIVE VAULT AND LENS REPOSITIONED 90 DEGREES TO A VERTICAL ORIENTATION. THE OUTCOME WAS FAVORABLE. IF ADDITIONAL INFORMATION IS RECEIVED A SUPPLEMENTAL MEDWATCH REPORT WILL BE SUBM…
https://www.accessdata.fda.gov/scripts/cdrh/cfdocs/cfMAUDE/Detail.CFM?MDRFOI__ID=18287974&pc=MTA	2023826-2023-05443	2023-12-01 05:00:00	Injury	STAAR SURGICAL COMPANY	2023-12-07 05:00:00	MTA	IMPLANTABLE COLLAMER LENS (ICL)	Inadequacy of Device Shape and/or Size; No Apparent Adverse Event	Appropriate Clinical Signs, Symptoms, Conditions Term / Code Not Available; No Clinical Signs, Symptoms or Conditions	P030016	1	Event Description: THE REPORTER INDICATED THE SURGEON IMPLANTED AN ICL IMPLANTABLE COLLAMER LENS INTO THE PATIENTS EYE. AT 2 DAYS POST-OP, THE LENS HAD A VAULT OF 2.0. THE ANGLE IS SLIGHTLY NARROW. THE LENS REMAINED IMPLANTED. ADDITIONAL INFORMATION HAS BEEN REQUESTED BUT NONE HAS BEEN FORTHCOMING. Manufacturer Narrative: ADDITIONAL DATA: H6: HEALTH IMPACT- CLINICAL CODE: 4581 - PIGMENT ON ANTERI…
https://www.accessdata.fda.gov/scripts/cdrh/cfdocs/cfMAUDE/Detail.CFM?MDRFOI__ID=12724511&pc=MTA	2023826-2021-04164	2021-10-24	Injury	STAAR SURGICAL COMPANY	2021-10-29	MTA	IMPLANTABLE COLLAMER LENS (ICL)	Inadequacy of Device Shape and/or Size; Patient-Device Incompatibility	Appropriate Clinical Signs, Symptoms, Conditions Term / Code Not Available; No Clinical Signs, Symptoms or Conditions		1	Event Description: THE REPORTER INDICATED THAT THE SURGEON IMPLANTED A 13.2MM VICMO13.2; -15.5 DIOPTER IMPLANTABLE COLLAMER LENS INTO THE PATIENT'S LEFT EYE (OS) ON (B)(6) 2021. ON (B)(6) 2021 THE LENS WAS EXCHANGED WITH A SHORTER LENGTH LENS DUE TO EXCESSIVE VAULTING AND SIGNIFICANT REDUCTION OF IRIDO-CORNEAL ANGLES. THIS RESOLVED THE PROBLEM. THE CAUSE OF THE EVENT WAS REPORTED AS A PATIENT REL…
https://www.accessdata.fda.gov/scripts/cdrh/cfdocs/cfMAUDE/Detail.CFM?MDRFOI__ID=14962931&pc=MTA	2023826-2022-02177	2022-06-28 04:00:00	Malfunction	STAAR SURGICAL COMPANY	2022-07-08 04:00:00	MTA	IMPLANTABLE COLLAMER LENS (ICL)	No Apparent Adverse Event	Appropriate Clinical Signs, Symptoms, Conditions Term / Code Not Available; No Clinical Signs, Symptoms or Conditions	P030016	1	Event Description: THE REPORTER INDICATED THAT THE SURGEON IMPLANTED A 12.6MM VICM5_12.6; -10.50 DIOPTER IMPLANTABLE COLLAMER LENS INTO THE PATIENT'S LEFT EYE (OS) ON (B)(6) 2022. AFTER IMPLANTATION THE SURGEON NOTICED THERE WAS A FOREIGN SUBSTANCE THAT LOOKED LIKE TINY PLASTIC DEBRIS WAS FOUND ON THE LENS. THE SURGEON REMOVED THE DEBRIS WITH THE FORCEPS. LENS REMAINS IMPLANTED. Manufacturer Narr…
https://www.accessdata.fda.gov/scripts/cdrh/cfdocs/cfMAUDE/Detail.CFM?MDRFOI__ID=18121662&pc=MTA	2023826-2023-04971	2023-10-24 04:00:00	Malfunction	STAAR SURGICAL COMPANY	2023-11-13 05:00:00	MTA	IMPLANTABLE COLLAMER LENS (ICL)	No Apparent Adverse Event	Appropriate Clinical Signs, Symptoms, Conditions Term / Code Not Available; No Clinical Signs, Symptoms or Conditions	P030016	1	Event Description: THE REPORTER INDICATED THAT 13.2MM VICM513.2 IMPLANTABLE COLLAMER LENS OF A -10.0 DIOPTER WAS IMPLANTED INTO THE PATIENT'S LEFT EYE (OS) ON (B)(6) 2023. "VERY SHALLOW AC POST ICL" WAS REPORTED. THE PROBLEM WAS NOT RESOLVED. CAUSE OF THE EVENT WAS THE DEVICE. Manufacturer Narrative: A4-A6: UNK. H6: WORK ORDER SEARCH: NO SIMILAR COMPLAINTS WITHIN ASSOCIATED LOTS WERE FOUND. CLAIM…
https://www.accessdata.fda.gov/scripts/cdrh/cfdocs/cfMAUDE/Detail.CFM?MDRFOI__ID=16809011&pc=MTA	2023826-2023-01476		Malfunction	STAAR SURGICAL COMPANY	2023-04-25 04:00:00	MTA	IMPLANTABLE COLLAMER LENS (ICL)	No Apparent Adverse Event	Appropriate Clinical Signs, Symptoms, Conditions Term / Code Not Available; No Clinical Signs, Symptoms or Conditions	UNK	1	Event Description: THE REPORTER INDICATED THAT AN IMPLANTABLE COLLAMER LENS WAS IMPLANTED INTO THE PATIENT'S EYE. REPORTEDLY, "A POST ICL PATIENT, WHO VISION IS GOOD, PRESSURE IS GOOD, BUT IS CONCERNED ABOUT THE ANGLES BEING NARROW COMPARED TO PRE-SURGERY." Manufacturer Narrative: D4 (EXPERIATION DATE); UNK NO SERIAL NUMBER REPORTED. H4 (DEVICE MANUFACTURING DATE): NO SERIAL NUMBER REPORTED. (B)(…
https://www.accessdata.fda.gov/scripts/cdrh/cfdocs/cfMAUDE/Detail.CFM?MDRFOI__ID=11782065&pc=MTA	2023826-2021-01381	2020-10-09 04:00:00	Malfunction	STAAR SURGICAL COMPANY	2021-05-06 04:00:00	MTA	IMPLANTABLE COLLAMER LENS (ICL)	Off-Label Use; Inadequacy of Device Shape and/or Size	Appropriate Clinical Signs, Symptoms, Conditions Term / Code Not Available; No Clinical Signs, Symptoms or Conditions	NA	1	Event Description: THE REPORTER INDICATED THAT A 12.1MM, VICMO12.1, -11.50 DIOPTER, IMPLANTABLE COLLAMER LENS WAS IMPLANTED INTO THE PATIENTS RIGHT EYE (OD) ON (B)(6) 2020. THE LENS WAS LATER EXCHANGED FOR A LONGER LENGTH LENS DUE TO LOW VAULT (REPORTED AS 1000 UM OR 2 CT). THIS EXCHANGE RESOLVED THE PROBLEM. CAUSE OF EVENT WAS UNKNOWN. Manufacturer Narrative: B5:THE REPORTER INDICATED THAT A 12.…
https://www.accessdata.fda.gov/scripts/cdrh/cfdocs/cfMAUDE/Detail.CFM?MDRFOI__ID=13552903&pc=MTA	2023826-2022-00448	2021-11-30 05:00:00	Injury	STAAR SURGICAL COMPANY	2022-02-17 05:00:00	MTA	IMPLANTABLE COLLAMER LENS (ICL)	Off-Label Use; Inadequacy of Device Shape and/or Size	Appropriate Clinical Signs, Symptoms, Conditions Term / Code Not Available; No Clinical Signs, Symptoms or Conditions	NA	1	Event Description: THE REPORTER INDICATED THAT A 13.2MM VICMO13.2 IMPLANTABLE COLLAMER LENS OF -12.0 DIOPTER WAS IMPLANTED INTO THE PATIENT'S RIGHT EYE (OD) ON (B)(6) 2021. ON (B)(6) 2021 THE LENS WAS EXCHANGED WITH A SHORTER LENGTH LENS DUE TO EXCESSIVE VAULT AND SIGNIFICANT REDUCTION OF IRIDO-CORNEAL ANGELS. THIS RESOLVED THE PROBLEM. CAUSE IS REPORTED AS UNKNOWN. Manufacturer Narrative: WEIGHT…
https://www.accessdata.fda.gov/scripts/cdrh/cfdocs/cfMAUDE/Detail.CFM?MDRFOI__ID=18480555&pc=MTA	2023826-2024-00090	2023-12-19 05:00:00	Injury	STAAR SURGICAL COMPANY	2024-01-09 05:00:00	MTA	IMPLANTABLE COLLAMER LENS (ICL)	Off-Label Use; Inadequacy of Device Shape and/or Size	Appropriate Clinical Signs, Symptoms, Conditions Term / Code Not Available; No Clinical Signs, Symptoms or Conditions	P030016	1	Event Description: THE REPORTER INDICATED THAT THE SURGEON IMPLANTED A 12.6MM VICMO 12.6 IMPLANTABLE COLLAMER LENS OF DIOPTER -7.0 INTO THE PATIENT'S RIGHT EYE (OD) ON (B)(6) 2023. ON (B)(6) 2023 THE LENS WAS EXCHANGED FOR A SHORTER LENGTH LENS DUE TO EXCESSIVE VAULT, ELEVATED IOP: 40MMHG WITHOUT PUPIL BLOCK AND ANGLE CLOSURE, AND SIGNIFICANT REDUCTION OF IRIDO-CORNEAL ANGLES. THE PROBLEM WAS RES…
https://www.accessdata.fda.gov/scripts/cdrh/cfdocs/cfMAUDE/Detail.CFM?MDRFOI__ID=4551528&pc=MTA	2023826-2015-00205	2014-12-25	Injury	STAAR SURGICAL COMPANY	2015-02-26	MTA	VISIAN TICL (IMPLANTABLE COLLAMER LENS)	Adverse Event Without Identified Device or Use Problem	Blurred Vision	NA	1	Event Description: THE REPORTER INDICATED THE SURGEON IMPLANTED A 13.2MM VTICMO13.2 IMPLANTABLE COLLAMER LENS IN THE PATIENT'S RIGHT EYE (OD) ON (B)(6) 2014 AND AN REFRACTIVE SURPRISE WAS NOTED. PATIENT EXPERIENCING BLURRED VISION. THE LENS WAS REMAINS IMPLANTED. Manufacturer Narrative: THIS PRODUCT IS MANUFACTURED IN THE U.S BUT NOT MARKETED IN THE U.S. (B)(4): EVALUATION: METHOD - WORK ORDER SE…
https://www.accessdata.fda.gov/scripts/cdrh/cfdocs/cfMAUDE/Detail.CFM?MDRFOI__ID=6037536&pc=MTA	2023826-2016-01482	2016-09-23	Injury	STAAR SURGICAL COMPANY	2016-10-18	MTA	ICL (IMPLANTABLE COLLAMER LENS)	Adverse Event Without Identified Device or Use Problem	Blurred Vision	NA	1	Event Description: THE REPORTER INDICATED THE SURGEON IMPLANTED A 13.2MM VTICMO13.2 IMPLANTABLE COLLAMER LENS - -18/1/145 DIOPTER, IN THE PATIENT'S RIGHT EYE (OD) ON (B)(6) 2015. THE LENS REMAINS IMPLANTED. THE PATIENT EXPERIENCED REFRACTIVE SURPRISE. THE SURGEON DECIDED TO MAKE A LASIK TOUCH-UP FOR BOTH EYES TO CORRECT REFRACTIVE SURPRISE. THE PATIENT'S POST-OP BEST CORRECTED VISUAL ACUITY WAS 2…
https://www.accessdata.fda.gov/scripts/cdrh/cfdocs/cfMAUDE/Detail.CFM?MDRFOI__ID=6153422&pc=MTA	2023826-2016-01745		Injury	STAAR SURGICAL COMPANY	2016-12-07	MTA	ICL (IMPLANTABLE COLLAMER LENS)	Adverse Event Without Identified Device or Use Problem	Blurred Vision	P030016	1	Event Description: THE PATIENT REPORTED THE SURGEON IMPLANTED A 13.2MM MICL13.2 IMPLANTABLE COLLAMER LENS, -9.5 DIOPTER, IN HER LEFT EYE (OS). THE PATIENT REPORTED HER VISION WAS SLIGHTLY BLURRY AT NIGHT AND IN DIM LIGHTING. THE LENS WAS IMPLANTED ON (B)(6) 2012 AND REMAINS IMPLANTED. THE FACILITY CONFIRMED THE INFORMATION AND INDICATED THE EVENT WAS DUE TO THE PATIENT HAD LARGE PUPILS AND WAS NO…
https://www.accessdata.fda.gov/scripts/cdrh/cfdocs/cfMAUDE/Detail.CFM?MDRFOI__ID=6153430&pc=MTA	2023826-2016-01744		Injury	STAAR SURGICAL COMPANY	2016-12-07	MTA	ICL (IMPLANTABLE COLLAMER LENS)	Adverse Event Without Identified Device or Use Problem	Blurred Vision	P030016	1	Event Description: THE PATIENT REPORTED THE SURGEON IMPLANTED A 13.2MM MICL13.2 IMPLANTABLE COLLAMER LENS, -8.5 DIOPTER, IN HER RIGHT EYE (OD). THE PATIENT REPORTED HER VISION WAS SLIGHTLY BLURRY AT NIGHT AND IN DIM LIGHTING. THE LENS WAS IMPLANTED ON (B)(6) 2010 AND REMAINS IMPLANTED. THE FACILITY CONFIRMED THE INFORMATION AND INDICATED THE EVENT WAS DUE TO THE PATIENT HAD LARGE PUPILS AND WAS N…
https://www.accessdata.fda.gov/scripts/cdrh/cfdocs/cfMAUDE/Detail.CFM?MDRFOI__ID=8887955&pc=MTA	2023826-2019-01354		Injury	STAAR SURGICAL COMPANY	2019-08-13 04:00:00	MTA	IMPLANTABLE COLLAMER LENS (ICL)	Adverse Event Without Identified Device or Use Problem	Blurred Vision	P030016	1	Event Description: THE REPORTER INDICATED THAT THE SURGEON IMPLANTED A 12.6MM MICL12.6, -6.5 DIOPTER, IMPLANTABLE COLLAMER LENS, INTO THE PATIENT'S EYE ON (B)(6) 2019. REPORTEDLY, "PATIENT WANTED BETTER NEAR VISION IN EYE AND SOME ASTIGMATISM WAS FOUND TO BE RELATED TO IT AS WELL." ON (B)(6) 2019 THE LENS WAS REMOVED AND EXCHANGED WITH A TORIC ICL. THIS RESOLVED THE PROBLEM. PER REPORTER ON (B)(6…
https://www.accessdata.fda.gov/scripts/cdrh/cfdocs/cfMAUDE/Detail.CFM?MDRFOI__ID=6231187&pc=MTA	2023826-2017-00030		Injury	STAAR SURGICAL COMPANY	2017-01-06	MTA	ICL (IMPLANTABLE COLLAMER LENS)	Adverse Event Without Identified Device or Use Problem; Appropriate Term/Code Not Available	Blurred Vision	N/A	1	Event Description: THE REPORTER INDICATED THAT THE SURGEON IMPLANTED A 12.6MM VTICMO12.6 IMPLANTABLE COLLAMER LENS, -15.00/+2.5/110 DIOPTER, IN THE PATIENT'S RIGHT EYE ON (B)(6) 2015. THE PATIENT EXPERIENCED REFRACTIVE SURPRISE. Manufacturer Narrative: ADDITIONAL INFORMATION: WORK ORDER SEARCH: NO SIMILAR COMPLAINTS WERE REPORTED FOR UNITS WITHIN THE SAME LOT. (B)(4). Manufacturer Narrative: THIS…
https://www.accessdata.fda.gov/scripts/cdrh/cfdocs/cfMAUDE/Detail.CFM?MDRFOI__ID=6074352&pc=MTA	2023826-2016-00909	2016-06-03	Injury	STAAR SURGICAL COMPANY	2016-11-02	MTA	ICL (IMPLANTABLE COLLAMER LENS)	Appropriate Term/Code Not Available	Blurred Vision	NA	1	Event Description: THE REPORTER INDICATED THAT THE SURGEON INSERTED A 12.6MM VTICMO12.6 IMPLANTABLE COLLAMER LENS, -04.00/+5.5/093 DIOPTER, IN THE PATIENT'S RIGHT EYE ON (B)(6) 2016. ON (B)(6) 2016, THE PATIENT EXPERIENCED REFRACTIVE SURPRISE. Manufacturer Narrative: (B)(4). Manufacturer Narrative: THIS PRODUCT IS MANUFACTURED IN THE U.S. BUT NOT MARKETED IN THE U.S. (B)(4). LENS NOT RETURNED.
https://www.accessdata.fda.gov/scripts/cdrh/cfdocs/cfMAUDE/Detail.CFM?MDRFOI__ID=6064967&pc=MTA	2023826-2016-01486	2016-06-14	Injury	STAAR SURGICAL COMPANY	2016-10-28	MTA	ICL (IMPLANTABLE COLLAMER LENS)	Appropriate Term/Code Not Available	Blurred Vision	N/A	1	Event Description: THE REPORTER INDICATED THAT THE SURGEON IMPLANTED A 13.2 MM VTICH13.2 IMPLANTABLE COLLAMER LENS, +7,00/+5,00/97 DIOPTER INTO THE PATIENT'S RIGHT EYE (OD) ON (B)(6) 2016. IT WAS INDICATED THE PATIENT DEVELOPED REFRACTIVE SURPRISE, LENS REMAINS IMPLANTED. Manufacturer Narrative: THE SURGEON HAS DECIDED TO CORRECT THE RESIDUAL REFRACTION WITH LASER VISION CORRECTION. Manufacturer …
https://www.accessdata.fda.gov/scripts/cdrh/cfdocs/cfMAUDE/Detail.CFM?MDRFOI__ID=4513718&pc=MTA	2023826-2015-00143		Injury	STAAR SURGICAL COMPANY	2015-02-12	MTA	VISIAN ICL (IMPLANTABLE COLLAMER LENS)	Appropriate Term/Code Not Available	Blurred Vision	P030016	1	Event Description: THE PATIENT REPORTED THE SURGEON IMPLANTED A 13.2MM MICL13.2 IMPLANTABLE COLLAMER LENS IN HER LEFT EYE (OS). THE PATIENT REPORTED THE LENS WAS EITHER REMOVED, REPLACED OR REPOSITIONED? ALSO ASTIGMATLISM IS RETURNING AND THERE IS SORENESS AND BLURRINESS. ADDITIONAL INFORMATION HAS BEEN REQUESTED BUT NONE HAS BEEN FORTHCOMING. IF ADDITIONAL INFORMATION IS RECEIVED, A SUPPLEMENTAL…
https://www.accessdata.fda.gov/scripts/cdrh/cfdocs/cfMAUDE/Detail.CFM?MDRFOI__ID=4789550&pc=MTA	2023826-2015-00578		Injury	STAAR SURGICAL COMPANY	2015-05-21	MTA	ICL (IMPLANTABLE COLLAMER LENS)	Appropriate Term/Code Not Available	Blurred Vision	NA	1	Event Description: THE REPORTER INDICATED THE SURGEON IMPLANTED A 13.2MM VTICMO13.2 IMPLANTABLE COLLAMER LENS IN THE PATIENT'S RIGHT EYE (OD) ON (B)(6) 2014. THE REPORTER INDICATED THE PATIENT WAS HAVING DIFFICULTIES WITH NEAR VISION (BLURRED). THE LENS REMAINS IMPLANTED. Manufacturer Narrative: (B)(4) IMPLANTED. DEVICE EVALUATED BY MANUFACTURER? NO: LENS IMPLANTED. METHOD: WORK ORDER SEARCH. RES…
https://www.accessdata.fda.gov/scripts/cdrh/cfdocs/cfMAUDE/Detail.CFM?MDRFOI__ID=4789592&pc=MTA	2023826-2015-00579		Injury	STAAR SURGICAL COMPANY	2015-05-21	MTA	ICL (IMPLANTABLE COLLAMER LENS)	Appropriate Term/Code Not Available	Blurred Vision	NA	1	Event Description: THE REPORTER INDICATED THE SURGEON IMPLANTED A 13.2MM VTICMO13.2 IMPLANTABLE COLLAMER LENS IN THE PATIENT'S LEFT EYE (OS) ON (B)(6) 2014. THE REPORTER INDICATED THERE WAS A RESIDUAL HYPEROPIC ERROR AND THE PATIENT WAS HAVING DIFFICULTIES WITH NEAR VISION (BLURRED). THE LENS REMAINS IMPLANTED. Manufacturer Narrative: (B)(4): (OTHER): LENS IMPLANTED. EVALUATION CODES: METHOD -(OT…
https://www.accessdata.fda.gov/scripts/cdrh/cfdocs/cfMAUDE/Detail.CFM?MDRFOI__ID=7213979&pc=MTA	2023826-2018-00137	2017-11-01	Malfunction	STAAR SURGICAL COMPANY	2018-01-23	MTA	IMPLANTABLE COLLAMER LENS	Device Dislodged or Dislocated	Blurred Vision	N/A	1	Event Description: THE REPORTER STATED THAT THE SURGEON IMPLANTED A 12.6MM VICM12.6, -5.50 DIOPTER INTO THE PATIENT'S LEFT EYE (OS) ON (B)(6) 2014. THE SURGEON NOTES LENS ROTATION, LOSS OF BCVA, AND BLURRED VISION. REPORTEDLY, LENS REMAINS IMPLANTED. SURGEON REPORTS THE "ICL ON DEAD VERTICAL POSITION." Manufacturer Narrative: THIS PRODUCT IS NOT MARKETED IN THE U.S. (B)(4).
https://www.accessdata.fda.gov/scripts/cdrh/cfdocs/cfMAUDE/Detail.CFM?MDRFOI__ID=7213981&pc=MTA	2023826-2018-00135	2017-11-01	Malfunction	STAAR SURGICAL COMPANY	2018-01-23	MTA	IMPLANTABLE COLLAMER LENS	Device Dislodged or Dislocated	Blurred Vision	N/A	1	Event Description: THE REPORTER STATED THAT THE SURGEON IMPLANTED A 12.6MM VTICMO12.6, -12.5/+2.0/134 (SPHERE/CYLINDER/AXIS) INTO THE PATIENT'S RIGHT EYE (OD) ON (B)(6) 2014. THE SURGEON REPORTS LENS ROTATION AND BLURRED VISION. ADDITIONALLY, THE SURGEON STATES THE LENS IS "ON A DEAD VERTICAL POSITION." REPORTEDLY, LENS REMAINS IMPLANTED. NO ADDITIONAL INFORMATION AVAILABLE AT THE TIME OF MDR SUB…
https://www.accessdata.fda.gov/scripts/cdrh/cfdocs/cfMAUDE/Detail.CFM?MDRFOI__ID=17438655&pc=MTA	2023826-2023-03285		Malfunction	STAAR SURGICAL COMPANY	2023-08-01 04:00:00	MTA	IMPLANTABLE COLLAMER LENS (ICL)	Device Dislodged or Dislocated	Blurred Vision	P030016	1	Event Description: THE REPORTER INDICATED THAT THE SURGEON IMPLANTED AN IMPLANTABLE COLLAMER LENS INTO THE PATIENT'S RIGHT EYE (OD). THE SURGEON REQUESTED A VECTOR ANALYSIS AND LATER IT WAS REPORTED THAT "THE MEAN CORNEAL POWER INCREASED BY 0.12D. THE MAGNITUDE OF THE CORNEAL ASTIGMATISM DECREASED BY -0.12D, THE STEEP MERIDIAN ROTATED CLOCKWISE BY 57 DEGREES. THE CORNEA FLATTENED BY 0.24D AND STE…
https://www.accessdata.fda.gov/scripts/cdrh/cfdocs/cfMAUDE/Detail.CFM?MDRFOI__ID=17438656&pc=MTA	2023826-2023-03286		Malfunction	STAAR SURGICAL COMPANY	2023-08-01 04:00:00	MTA	IMPLANTABLE COLLAMER LENS (ICL)	Device Dislodged or Dislocated	Blurred Vision	P030016	1	Event Description: THE REPORTER INDICATED THAT THE SURGEON IMPLANTED AN IMPLANTABLE COLLAMER LENS INTO THE PATIENT'S LEFT EYE (OS). THE SURGEON REQUESTED A VECTOR ANALYSIS AND LATER IT WAS REPORTED THAT THE MEAN CORNEAL POWER DECREASED BY -0.22 D. THE MAGNITUDE OF THE CORNEAL ASTIGMATISM INCREASED BY 0.81 D, AND THE STEEP MERIDIAN ROTATED COUNTERCLOCKWISE BY 50 DEGREES. THE CORNEA FLATTENED BY 0.…
https://www.accessdata.fda.gov/scripts/cdrh/cfdocs/cfMAUDE/Detail.CFM?MDRFOI__ID=7136399&pc=MTA	2023826-2017-01940		Malfunction	STAAR SURGICAL COMPANY	2017-12-20	MTA	IMPLANTABLE COLLAMER LENS (ICL)	Device Dislodged or Dislocated; Adverse Event Without Identified Device or Use Problem	Blurred Vision	NA	1	Event Description: THE REPORTER INDICATED THE SURGEON IMPLANTED A 13.2MM VTICM5_13.2 IMPLANTABLE COLLAMER LENS, -12.5/+3.0/X090 (SPHERE/CYLINDER/AXIS), IN THE PATIENT'S RIGHT EYE (OD) ON (B)(6) 2016. ONE YEAR LATER, THE REPORTER INDICATED A REFRACTIVE SURPRISE. THE PATIENT IS HAPPY AND THE LENS REMAINS IMPLANTED. Manufacturer Narrative: CORRECTED DATA: THE REPORTER INDICATED THAT THE SURGEON IMPL…
https://www.accessdata.fda.gov/scripts/cdrh/cfdocs/cfMAUDE/Detail.CFM?MDRFOI__ID=6326555&pc=MTA	2023826-2017-00153	2015-02-10	Injury	STAAR SURGICAL COMPANY	2017-02-13	MTA	ICL (IMPLANTABLE COLLAMER LENS)	Device Operates Differently Than Expected	Blurred Vision	N/A	1	Event Description: THE REPORTER INDICATED THAT THE SURGEON IMPLANTED A 12.6MM VTICMO12.6 IMPLANTABLE COLLAMER LENS, -4.5/+6.0/90 DIOPTER, IN THE PATIENT'S LEFT EYE (OS) ON (B)(6) 2015. THE PATIENT EXPERIENCED A REFRACTIVE SURPRISE. ON PATIENT'S LAST VISIT ON (B)(6) 2015, THE PATIENT'S BEST CORRECTED VISUAL ACUITY WAS 20/20. THE STATUS OF THE EYE WAS A "QUIET EYE" AND "GOOD VAULTING". Manufacturer…
https://www.accessdata.fda.gov/scripts/cdrh/cfdocs/cfMAUDE/Detail.CFM?MDRFOI__ID=7205806&pc=MTA	2023826-2018-00105	2015-11-30	Malfunction	STAAR SURGICAL COMPANY	2018-01-19	MTA	IMPLANTABLE COLLAMER LENS (ICL)	Device Operates Differently Than Expected	Blurred Vision	NA	1	Event Description: THE REPORTER INDICATED THAT THE SURGEON IMPLANTED A 13.2 MM VICMO13.2, -9.00 DIOPTER, IMPLANTABLE COLLAMER LENS IN THE PATIENT'S LEFT EYE (OS) ON (B)(6) 2015. REFRACTIVE SURPRISE WAS NOTICED. THE LENS REMAINS IMPLANTED IN THE EYE. ADDITIONAL INFORMATION HAS BEEN REQUESTED BUT NONE HAS BEEN FORTHCOMING. IF ADDITIONAL INFORMATION IS RECEIVED, A SUPPLEMENTAL MEDWATCH REPORT WILL B…
https://www.accessdata.fda.gov/scripts/cdrh/cfdocs/cfMAUDE/Detail.CFM?MDRFOI__ID=6429909&pc=MTA	2023826-2017-00487	2015-12-10	Injury	STAAR SURGICAL COMPANY	2017-03-23	MTA	IMPLANTABLE COLLAMER LENS (ICL)	Device Operates Differently Than Expected	Blurred Vision	N/A	1	Event Description: THE REPORTER INDICATED THAT THE SURGEON IMPLANTED A 13.2MM VTICM13.2, DIOPTER -17.0/+6.0/062 IMPLANTABLE COLLAMER LENS, INTO THE PATIENT'S LEFT EYE (OS) ON (B)(6) 2015. THE PATIENT BEGAN TO EXPERIENCE REFRACTIVE SURPRISE AND BLURRY VISION. AS OF THE DATE OF MDR REPORTING THE LENS REMAINS IMPLANTED. Manufacturer Narrative: THIS PRODUCT IS MANUFACTURED BUT NOT MARKETED IN THE U.S…
https://www.accessdata.fda.gov/scripts/cdrh/cfdocs/cfMAUDE/Detail.CFM?MDRFOI__ID=6501471&pc=MTA	2023826-2017-00653	2016-04-11	Injury	STAAR SURGICAL COMPANY	2017-04-18	MTA	IMPLANTABLE COLLAMER LENS (ICL)	Device Operates Differently Than Expected	Blurred Vision	N/A	1	Event Description: THE REPORTER INDICATED THAT THE SURGEON IMPLANTED A 12.6MM VTICM12.6, DIOPTER -3.5/3.5/031 IMPLANTABLE COLLAMER LENS, INTO THE PATIENT'S LEFT EYE (OS) ON (B)(6) 2016. THE PATIENT BEGAN TO EXPERIENCE REFRACTIVE SURPRISE. AS OF THE DATE OF MDR REPORTING THE LENS REMAINS IMPLANTED. Manufacturer Narrative: ADDITIONAL DATA: IN THE INITIAL REPORT, THE LENS MODEL IS DESCRIBED AS A VTI…
https://www.accessdata.fda.gov/scripts/cdrh/cfdocs/cfMAUDE/Detail.CFM?MDRFOI__ID=6564060&pc=MTA	2023826-2017-00804	2016-10-19	Injury	STAAR SURGICAL COMPANY	2017-05-12	MTA	IMPLANTABLE COLLAMER LENS (ICL)	Device Operates Differently Than Expected	Blurred Vision	N/A	1	Event Description: THE REPORTER INDICATED THAT THE SURGEON IMPLANTED A 13.2 MM VTICMO 13.2, DIOPTER -18.0/+2.5/X178 IMPLANTABLE COLLAMER LENS, INTO THE PATIENT'S RIGHT EYE (OD) ON (B)(6) 2016. THE PATIENT BEGAN TO EXPERIENCE REFRACTIVE SURPRISE. AS OF THE DATE OF MDR REPORTING THE LENS REMAINS IMPLANTED. Manufacturer Narrative: THIS PRODUCT IS MANUFACTURED BUT NOT MARKETED IN THE U.S. (B)(4). DEV…
https://www.accessdata.fda.gov/scripts/cdrh/cfdocs/cfMAUDE/Detail.CFM?MDRFOI__ID=6393933&pc=MTA	2023826-2017-00368	2017-01-02	Injury	STAAR SURGICAL COMPANY AG	2017-03-09	MTA	ICL (IMPLANTABLE COLLAMER LENS)	Device Operates Differently Than Expected	Blurred Vision	N/A	1	Event Description: THE REPORTER INDICATED THAT THE SURGEON IMPLANTED A 13.2MM VTICMO13.2 IMPLANTABLE COLLAMER LENS, -0.50/+3.50/168 DIOPTER IN THE PATIENT'S RIGHT EYE (OD) ON (B)(6) 2016. THE PATIENT EXPERIENCED A REFRACTIVE SURPRISE. THE LENS REMAIN IMPLANTED. Manufacturer Narrative: THIS PRODUCT IS NOT MARKETED IN THE U.S. NO SIMILAR COMPLAINTS WERE REPORTED FOR UNITS WITHIN THE SAME LOT. DEVIC…
https://www.accessdata.fda.gov/scripts/cdrh/cfdocs/cfMAUDE/Detail.CFM?MDRFOI__ID=6366306&pc=MTA	2023826-2017-00276	2017-01-16	Injury	STAAR SURGICAL COMPANY	2017-02-28	MTA	IMPLANTABLE COLLAMER LENS	Device Operates Differently Than Expected	Blurred Vision	NA	1	Event Description: THE REPORTER INDICATED THAT THE SURGEON IMPLANTED A 13.2 MM VICM5 13.2 IMPLANTABLE COLLAMER LENS, -13.50 DIOPTER, INTO THE PATIENT'S LEFT EYE (OS) ON (B)(6) 2016. ON (B)(6) 2017, THE PATIENT EXPERIENCED REFRACTIVE SURPRISE. AS OF THE DATE OF MDR SUBMISSION, THE LENS REMAINS IMPLANTED IN THE PATIENT AND THEREFORE, HAS NOT BEEN RETURNED FOR EVALUATION. Manufacturer Narrative: ON …
https://www.accessdata.fda.gov/scripts/cdrh/cfdocs/cfMAUDE/Detail.CFM?MDRFOI__ID=7274885&pc=MTA	2023826-2018-00224	2017-02-02	Malfunction	STAAR SURGICAL COMPANY	2018-02-15	MTA	IMPLANTABLE COLLAMER LENS (ICL)	Device Operates Differently Than Expected	Blurred Vision	NA	1	Event Description: THE REPORTER INDICATED THAT THE SURGEON IMPLANTED A 12.6MM VTICM5_12.6 IMPLANTABLE COLLAMER LENS, -8/4/100 (SPHERE/CYLINDER/AXIS), INTO THE PATIENT'S RIGHT EYE (OD) . THE SURGEON NOTED REFRACTIVE SURPRISE. REPORTEDLY, THE LENS REMAINS IMPLANTED. NO ADDITIONAL INFORMATION IS AVAILABLE AS OF THE TIME OF MDR SUBMISSION. Manufacturer Narrative: CORRECTED DATA: THE REPORTER INDICATE…
https://www.accessdata.fda.gov/scripts/cdrh/cfdocs/cfMAUDE/Detail.CFM?MDRFOI__ID=7275256&pc=MTA	2023826-2018-00225	2017-02-02	Malfunction	STAAR SURGICAL COMPANY	2018-02-15	MTA	IMPLANTABLE COLLAMER LENS (ICL)	Device Operates Differently Than Expected	Blurred Vision	NA	1	Event Description: THE REPORTER INDICATED THAT THE SURGEON IMPLANTED A 12.6MM VTICM5_12.6 IMPLANTABLE COLLAMER LENS, -6.50/+3.00/87 (SPHERE/CYLINDER/AXIS), INTO THE PATIENT'S LEFT EYE (OS) . THE SURGEON NOTED REFRACTIVE SURPRISE. REPORTEDLY, THE LENS REMAINS IMPLANTED. NO ADDITIONAL INFORMATION IS AVAILABLE AS OF THE TIME OF MDR SUBMISSION. Manufacturer Narrative: CORRECTED DATA: THE REPORTER IND…
https://www.accessdata.fda.gov/scripts/cdrh/cfdocs/cfMAUDE/Detail.CFM?MDRFOI__ID=6545668&pc=MTA	2023826-2017-00764	2017-04-04	Injury	STAAR SURGICAL COMPANY	2017-05-04	MTA	IMPLANTABLE COLLAMER LENS (ICL)	Device Operates Differently Than Expected	Blurred Vision	N/A	1	Event Description: THE REPORTER INDICATED THAT THE SURGEON IMPLANTED A 12.6MM VTICMO12.6, DIOPTER -17.00/250/125 IMPLANTABLE COLLAMER LENS, INTO THE PATIENT'S LEFT EYE (OS) ON (B)(6) 2016. THE PATIENT BEGAN TO EXPERIENCE REFRACTIVE SURPRISE. AS OF THE DATE OF MDR REPORTING THE LENS REMAINS IMPLANTED, HOWEVER A LENS EXCHANGE IS PLANNED. Manufacturer Narrative: PREVIOUS: LENS REMAINS IMPLANTED. ON …
https://www.accessdata.fda.gov/scripts/cdrh/cfdocs/cfMAUDE/Detail.CFM?MDRFOI__ID=6680940&pc=MTA	2023826-2017-01087	2017-05-11	Malfunction	STAAR SURGICAL COMPANY	2017-06-30	MTA	ICL (IMPLANTABLE COLLAMER LENS)	Device Operates Differently Than Expected	Blurred Vision	N/A	1	Event Description: THE REPORTER INDICATED THAT THE SURGEON IMPLANTED A 13.2MM VTICMO13.2 IMPLANTABLE COLLAMER LENS, -11.5/+2.5/76 DIOPTER, IN THE PATIENT'S LEFT EYE (OS) ON (B)(6) 2017. THE PATIENT EXPERIENCED REFRACTIVE SURPRISE. AS OF THE DAY OF MDR SUBMISSION THE LENS REMAINS IMPLANTED. ACCORDING TO THE CUSTOMER, THE SURGEON DOES NOT HAVE A PLAN TO EXCHANGE THE LENS, AND WILL FOLLOW-UP THE PAT…
https://www.accessdata.fda.gov/scripts/cdrh/cfdocs/cfMAUDE/Detail.CFM?MDRFOI__ID=6941344&pc=MTA	2023826-2017-01558	2017-07-15	Malfunction	STAAR SURGICAL COMPANY	2017-10-11	MTA	IMPLANTABLE COLLAMER LENS	Device Operates Differently Than Expected	Blurred Vision	NA	1	Event Description: THE REPORTER INDICATED THAT THE SURGEON IMPLANTED A 13.2 MM VTICM5_13.2 IMPLANTABLE COLLAMER LENS, -8.5/+3.0/091 DIOPTER, INTO THE PATIENT'S RIGHT EYE (OD) ON (B)(6) 2017. A REFRACTIVE SURPRISE WAS NOTED BY THE SURGEON DURING THE POST-OP VISIT, DATE OF (B)(6) 2017. Manufacturer Narrative: PRODUCT MANUFACTURED BUT NOT SOLD IN THE U.S. LENS WORK ORDER SEARCH: NO SIMILAR COMPLAINT…
https://www.accessdata.fda.gov/scripts/cdrh/cfdocs/cfMAUDE/Detail.CFM?MDRFOI__ID=6952440&pc=MTA	2023826-2017-01566	2017-08-03	Malfunction	STAAR SURGICAL COMPANY	2017-10-16	MTA	IMPLANTABLE COLLAMER LENS (ICL)	Device Operates Differently Than Expected	Blurred Vision	N/A	1	Event Description: THE REPORTER INDICATED THAT THE SURGEON IMPLANTED A 13.2 MM VTICMO13.2, -9.5/+3.0/076 DIOPTER, IMPLANTABLE COLLAMER LENS IN THE PATIENT'S RIGHT EYE (OD) ON (B)(6) 2017. REFRACTIVE SURPRISE WAS NOTICED. Manufacturer Narrative: CORRECTED DATA: LENS REMAINS IMPLANTED. DOCTOR WANTS TO OBSERVE FOR A FEW MONTHS. CLAIM#: (B)(4). Manufacturer Narrative: THIS PRODUCT IS NOT MARKETED IN …
https://www.accessdata.fda.gov/scripts/cdrh/cfdocs/cfMAUDE/Detail.CFM?MDRFOI__ID=6879884&pc=MTA	2023826-2017-01477	2017-08-24	Malfunction	STAAR SURGICAL COMPANY	2017-09-20	MTA	IMPLANTABLE COLLAMER LENS	Device Operates Differently Than Expected	Blurred Vision	NA	1	Event Description: THE REPORTER INDICATED THAT THE SURGEON IMPLANTED A 13.2 MM VICM5_13.2 IMPLANTABLE COLLAMER LENS, -11.5 DIOPTER, INTO THE PATIENT'S LEFT EYE (OS) ON (B)(6) 2017. ON (B)(6) 2017 A REFRACTIVE SURPRISE WAS NOTED BY THE SURGEON. ON 28-08-2017, DURING THE PATIENT'S LAST REPORTED VISIT, THE UCVA WAS MEASURED AT 20/20 AND THE RX +0.25 SPH. PER THE SURGEON NO LENS EXCHANGE IS NEEDED. T…
https://www.accessdata.fda.gov/scripts/cdrh/cfdocs/cfMAUDE/Detail.CFM?MDRFOI__ID=6938985&pc=MTA	2023826-2017-01554	2017-08-28	Malfunction	STAAR SURGICAL COMPANY	2017-10-10	MTA	IMPLANTABLE COLLAMER LENS (ICL)	Device Operates Differently Than Expected	Blurred Vision	N/A	1	Event Description: THE REPORTER INDICATED THAT THE SURGEON IMPLANTED A 12.6 VTICM5_12.6, -7.5/+3.0/96 DIOPTER, IMPLANTABLE COLLAMER LENS IN THE PATIENT'S LEFT EYE (OS) ON (B)(6) 2017. REFRACTIVE SURPRISE WAS NOTICED. THE LENS REMAINS IMPLANTED. Manufacturer Narrative: CLAIM# (B)(4). Manufacturer Narrative: CLAIM# (B)(4). Manufacturer Narrative: THIS PRODUCT IS NOT MARKETED IN THE US. (B)(4).
https://www.accessdata.fda.gov/scripts/cdrh/cfdocs/cfMAUDE/Detail.CFM?MDRFOI__ID=6970586&pc=MTA	2023826-2017-01595	2017-09-25	Malfunction	STAAR SURGICAL COMPANY	2017-10-23	MTA	IMPLANTABLE COLLAMER LENS (ICL)	Device Operates Differently Than Expected	Blurred Vision	N/A	1	Event Description: THE REPORTER INDICATED THAT THE SURGEON IMPLANTED A VTICM5_13.2 , -11.5/+1/009 DIOPTER, IMPLANTABLE COLLAMER LENS IN THE PATIENT'S LEFT EYE (OS) ON (B)(6) 2017. REFRACTIVE SURPRISE WAS NOTICED. THE LENS REMAINS IMPLANTED. Manufacturer Narrative: ADDITIONAL INFORMATION: THE DOCTOR HAS DECIDED TO WAIT ANOTHER FEW MONTHS TO SEE WHAT HAS HAPPENED WITH THE REFRACTION. LENS IS STILL …
https://www.accessdata.fda.gov/scripts/cdrh/cfdocs/cfMAUDE/Detail.CFM?MDRFOI__ID=6970590&pc=MTA	2023826-2017-01568	2017-09-25	Malfunction	STAAR SURGICAL COMPANY	2017-10-23	MTA	IMPLANTABLE COLLAMER LENS (ICL)	Device Operates Differently Than Expected	Blurred Vision	N/A	1	Event Description: THE REPORTER INDICATED THAT THE SURGEON IMPLANTED A VTICM5_13.2 , -11/1.5/151 DIOPTER, IMPLANTABLE COLLAMER LENS IN THE PATIENT'S RIGHT EYE (OD) ON (B)(6) 2017. REFRACTIVE SURPRISE WAS NOTICED. THE LENS REMAINS IMPLANTED. Manufacturer Narrative: THIS PRODUCT IS NOT MARKETED IN THE US. CONCLUSION CODE: PER DFU FOR THIS LENS MODEL, VICL'S ARE CONTRAINDICATED OF IMPLANTATIONS OF A…
https://www.accessdata.fda.gov/scripts/cdrh/cfdocs/cfMAUDE/Detail.CFM?MDRFOI__ID=7097940&pc=MTA	2023826-2017-01835	2017-09-27	Malfunction	STAAR SURGICAL COMPANY	2017-12-07	MTA	IMPLANTABLE COLLAMER LENS (ICL)	Device Operates Differently Than Expected	Blurred Vision	N/A	1	Event Description: THE REPORTER INDICATED THAT THE SURGEON IMPLANTED A 13.2 MM VTICMO13.2, -8.50/+2.00/080 DIOPTER, IMPLANTABLE COLLAMER LENS IN THE PATIENT'S LEFT EYE (OS) ON (B)(6) 2017. REFRACTIVE SURPRISE WAS NOTICED. THE LENS REMAINS IMPLANTED IN THE EYE. ATTEMPTS TO OBTAIN ADDITIONAL INFORMATION HAVE BEEN UNSUCCESSFUL. Manufacturer Narrative: THIS PRODUCT IS NOT MARKETED IN THE US. NO SIMIL…
https://www.accessdata.fda.gov/scripts/cdrh/cfdocs/cfMAUDE/Detail.CFM?MDRFOI__ID=7097943&pc=MTA	2023826-2017-01836	2017-09-28	Malfunction	STAAR SURGICAL COMPANY	2017-12-07	MTA	IMPLANTABLE COLLAMER LENS (ICL)	Device Operates Differently Than Expected	Blurred Vision	N/A	1	Event Description: THE REPORTER INDICATED THAT THE SURGEON IMPLANTED A 13.2 MM VTICMO13.2, -10.50/+3.50/097 DIOPTER, IMPLANTABLE COLLAMER LENS IN THE PATIENT'S RIGHT EYE (OD) ON (B)(6) 2017. REFRACTIVE SURPRISE WAS NOTICED. THE LENS REMAINS IMPLANTED IN THE EYE. ATTEMPTS TO OBTAIN ADDITIONAL INFORMATION HAVE BEEN UNSUCCESSFUL. Manufacturer Narrative: THIS PRODUCT IS NOT MARKETED IN THE US. WORK O…
https://www.accessdata.fda.gov/scripts/cdrh/cfdocs/cfMAUDE/Detail.CFM?MDRFOI__ID=6987323&pc=MTA	2023826-2017-01633	2017-10-02	Malfunction	STAAR SURGICAL COMPANY	2017-10-30	MTA	IMPLANTABLE COLLAMER LENS (ICL)	Device Operates Differently Than Expected	Blurred Vision	N/A	1	Event Description: THE REPORTER INDICATED THAT THE SURGEON IMPLANTED A 12.6 MM VTICM5_12.6, -3.0/4.5/X070 DIOPTER, IN THE PATIENT'S LEFT EYE (OS) ON (B)(6) 2017. REFRACTIVE SURPRISE WAS NOTICED. THE SURGEON IS PLANNING TO EXCHANGE THE LENS. Manufacturer Narrative: ADDITIONAL INFORMATION: THE REPORTER STATED THAT THE LENS WILL BE ROTATED IN (B)(6) 2018. CLAIM #: (B)(4). Manufacturer Narrative: THI…
https://www.accessdata.fda.gov/scripts/cdrh/cfdocs/cfMAUDE/Detail.CFM?MDRFOI__ID=7146626&pc=MTA	2023826-2017-01941	2017-10-19	Malfunction	STAAR SURGICAL COMPANY	2017-12-26	MTA	IMPLANTABLE COLLAMER LENS (ICL)	Device Operates Differently Than Expected	Blurred Vision	N/A	1	Event Description: THE REPORTER INDICATED THAT THE SURGEON IMPLANTED A 13.2 MM VTICM5_13.2, -8.0/+2.0/157 (SPHERE/CYLINDER/AXIS), IMPLANTABLE COLLAMER LENS IN THE PATIENT'S RIGHT EYE (OD) ON (B)(6) 2017. THE PATIENT EXPERIENCED REFRACTIVE SURPRISE WITH THE POST-OP MANIFEST REFRACTION, SPH. -0.1 AMD CYL. -1.75. THE SURGEON IS PLANNING TO PERFORM LASIK FOR ADDITIONAL CORRECTION. Manufacturer Narrat…
https://www.accessdata.fda.gov/scripts/cdrh/cfdocs/cfMAUDE/Detail.CFM?MDRFOI__ID=7205784&pc=MTA	2023826-2018-00103	2017-12-04	Malfunction	STAAR SURGICAL COMPANY	2018-01-19	MTA	IMPLANTABLE COLLAMER LENS (ICL)	Device Operates Differently Than Expected	Blurred Vision	NA	1	Event Description: THE REPORTER INDICATED THAT THE SURGEON IMPLANTED A 13.7 MM VTICMO13.7, -10.5/+6/098 (SPHERE/CYLINDER/AXIS), IMPLANTABLE COLLAMER LENS IN THE PATIENT'S RIGHT EYE (OD) ON (B)(6) 2017. REFRACTIVE SURPRISE WAS NOTICED. THE LENS REMAINS IMPLANTED IN THE EYE. ADDITIONAL INFORMATION HAS BEEN REQUESTED BUT NONE HAS BEEN FORTHCOMING. IF ADDITIONAL INFORMATION IS RECEIVED, A SUPPLEMENTA…
https://www.accessdata.fda.gov/scripts/cdrh/cfdocs/cfMAUDE/Detail.CFM?MDRFOI__ID=7268465&pc=MTA	2023826-2018-00179	2018-01-15	Malfunction	STAAR SURGICAL COMPANY AG	2018-02-13	MTA	IMPLANTABLE COLLAMER LENS (ICL)	Device Operates Differently Than Expected	Blurred Vision	N/A	1	Event Description: THE REPORTER INDICATED THAT THE SURGEON IMPLANTED A 13.0 MM ICM130V4, -13.5 DIOPTER, IMPLANTABLE COLLAMER LENS IN THE PATIENT'S (OS) ON (B)(6) 2001. ON (B)(6) 2018, REFRACTIVE CHANGE OVER TIME WAS NOTICED. THE SURGEON IS MAKING PLANS TO EXCHANGE THE LENS. THE REPORTER STATED THAT THE REASON FOR THE REFRACTIVE CHANGE OVER TIME WAS BECAUSE OF PENETRATING KERATOPLASTY (PKP) PERFOR…
https://www.accessdata.fda.gov/scripts/cdrh/cfdocs/cfMAUDE/Detail.CFM?MDRFOI__ID=7484263&pc=MTA	2023826-2018-00639	2018-02-01	Malfunction	STAAR SURGICAL COMPANY	2018-05-03	MTA	IMPLANTABLE COLLAMER LENS (ICL)	Device Operates Differently Than Expected	Blurred Vision	NA	1	Event Description: THE REPORTER INDICATED THE SURGEON IMPLANTED A 12.1MM VICM5_12.1 IMPLANTABLE COLLAMER LENS, -2.50 DIOPTER, INTO THE PATIENT'S RIGHT EYE (OD) ON (B)(6) 2018. THE SURGEON NOTES REFRACTIVE SURPRISE. TO DATE, THE LENS REMAINS IMPLANTED. Manufacturer Narrative: THIS PRODUCT IS MANUFACTURED IN THE U.S. BUT NOT MARKETED IN THE U.S. WORK ORDER SEARCH: NO SIMILAR COMPLAINT TYPE EVENTS R…
https://www.accessdata.fda.gov/scripts/cdrh/cfdocs/cfMAUDE/Detail.CFM?MDRFOI__ID=7660090&pc=MTA	2023826-2018-01003	2018-06-04	Injury	STAAR SURGICAL COMPANY	2018-07-03	MTA	IMPLANTABLE COLLAMER LENS	Device Operates Differently Than Expected	Blurred Vision	NA	1	Event Description: THE REPORTER INDICATED THAT THE SURGEON IMPLANTED A 13.2 MM VICM6_13.2 IMPLANTABLE COLLAMER LENS, -5.5 DIOPTER INTO THE PATIENT'S LEFT EYE (OS) ON (B)(6) 2018. THE SURGEON REPORTS >2-LINE DROP OF BCVA AT THE 1-MONTH POSTOPERATIVE VISIT. UPON THE REPEAT EXAM OF THE BCDVA DURING A FOLLOW UP VISIT, IT WAS DETERMINED THAT, ALTHOUGH THERE WAS A 1-LINE IMPROVEMENT IN THE BEST CORRECT…
https://www.accessdata.fda.gov/scripts/cdrh/cfdocs/cfMAUDE/Detail.CFM?MDRFOI__ID=6395325&pc=MTA	2023826-2017-00359		Injury	STAAR SURGICAL COMPANY	2017-03-10	MTA	ICL (IMPLANTABLE COLLAMER LENS)	Device Operates Differently Than Expected	Blurred Vision	N/A	1	Event Description: THE REPORTER INDICATED THAT THE SURGEON IMPLANTED A 12.6MM VTICMO12.6 IMPLANTABLE COLLAMER LENS, -6.00/+6.0/111 DIOPTER, IN THE PATIENT'S RIGHT EYE (OD) ON (B)(6) 2016. THE PATIENT EXPERIENCED REFRACTIVE SURPRISE. AS OF THE DAY OF MDR SUBMISSION, THE LENS REMAINS IMPLANTED. THIS CASE IS CURRENTLY UNDER MEDICAL CONSULTATION. Manufacturer Narrative: THIS PRODUCT IS NOT MARKETED I…
https://www.accessdata.fda.gov/scripts/cdrh/cfdocs/cfMAUDE/Detail.CFM?MDRFOI__ID=6429982&pc=MTA	2023826-2017-00475		Injury	STAAR SURGICAL COMPANY	2017-03-23	MTA	ICL (IMPLANTABLE COLLAMER LENS)	Device Operates Differently Than Expected	Blurred Vision	N/A	1	Event Description: THE REPORTER INDICATED THAT THE SURGEON IMPLANTED A 12.6MM VTICMO12.6 IMPLANTABLE COLLAMER LENS, -17.5/+2/167 DIOPTER, IN THE PATIENT'S LEFT EYE (OS) ON (B)(6) 2017. THE PATIENT EXPERIENCED REFRACTIVE SURPRISE. DOCTOR IS MONITORING THE PATIENT STATUS. AS OF THE DATE OF MDR SUBMISSION, THE LENS REMAINS IMPLANTED. Manufacturer Narrative: CONCLUSION CODE: THE REPORTER CONFIRMED TH…
https://www.accessdata.fda.gov/scripts/cdrh/cfdocs/cfMAUDE/Detail.CFM?MDRFOI__ID=6531866&pc=MTA	2023826-2017-00659		Injury	STAAR SURGICAL COMPANY	2017-04-28	MTA	ICL (IMPLANTABLE COLLAMER LENS)	Device Operates Differently Than Expected	Blurred Vision	N/A	1	Event Description: THE REPORTER INDICATED THAT THE SURGEON IMPLANTED A 13.2MM VTICMO13.2 IMPLANTABLE COLLAMER LENS IN THE PATIENT'S RIGHT EYE (OD). THE PATIENT EXPERIENCED REFRACTIVE SURPRISE AND FELT EMBARRASSED. THE CUSTOMER STATED THE LENS WAS CORRECTLY IMPLANTED. AS OF THE DAY OF MDR SUBMISSION, THE LENS REMAINS IMPLANTED. THIS CASE IS UNDER MEDICAL CONSULTING, ATTEMPTS TO GET ADDITIONAL INFO…
https://www.accessdata.fda.gov/scripts/cdrh/cfdocs/cfMAUDE/Detail.CFM?MDRFOI__ID=6839063&pc=MTA	2023826-2017-01374		Malfunction	STAAR SURGICAL COMPANY	2017-09-01	MTA	IMPLANTABLE COLLAMER LENS (ICL)	Device Operates Differently Than Expected	Blurred Vision	P030016	1	Event Description: THE REPORTER INDICATED THAT THE SURGEON IMPLANTED AN MICL12.1, -9.5 DIOPTER, IMPLANTABLE COLLAMER LENS IN THE PATIENT'S RIGHT EYE (OD) ON (B)(6) 2017. REFRACTIVE SURPRISE WAS NOTICED AS THE PATIENT IS NOW APPROXIMATELY +1.25D SEQ POST-OP. THE SURGEON CONFIRMED THAT THE ICL IS SITTING IN THE CORRECT POSITION AND NOT INVERTED. HE ALSO VERIFIED THAT THE CYCLO WAS NOT SIGNIFICANTLY…
https://www.accessdata.fda.gov/scripts/cdrh/cfdocs/cfMAUDE/Detail.CFM?MDRFOI__ID=6839072&pc=MTA	2023826-2017-01375		Malfunction	STAAR SURGICAL COMPANY	2017-09-01	MTA	IMPLANTABLE COLLAMER LENS (ICL)	Device Operates Differently Than Expected	Blurred Vision	P030016	1	Event Description: THE REPORTER INDICATED THAT THE SURGEON IMPLANTED AN MICL12.1, -10.5 DIOPTER, IMPLANTABLE COLLAMER LENS, IN THE PATIENT'S LEFT EYE (OS) ON (B)(6) 2017. REFRACTIVE SURPRISE WAS NOTICED. THE LENS REMAINS IMPLANTED. ATTEMPTS AT OBTAINING ADDITIONAL INFORMATION HAVE BEEN UNSUCCESSFUL. Manufacturer Narrative: CLAIM# (B)(4). Manufacturer Narrative: (B)(4).
https://www.accessdata.fda.gov/scripts/cdrh/cfdocs/cfMAUDE/Detail.CFM?MDRFOI__ID=6978049&pc=MTA	2023826-2017-01625		Injury	STAAR SURGICAL COMPANY	2017-10-25	MTA	IMPLANTABLE COLLAMER LENS (ICL)	Device Operates Differently Than Expected	Blurred Vision	N/A	1	Event Description: THE REPORTER INDICATED THAT ON (B)(6) 2017 THE SURGEON IMPLANTED A 13.2MM VICMO13.2 IMPLANTABLE COLLAMER LENS, DIOPTER -12.00 INTO THE PATIENT'S LEFT (OS) EYE. REPORTEDLY, IMMEDIATELY AFTERWARD, THE PATIENT COMPLAINED OF A CIRCULAR "CLOUD" (BLURRED SPOT) IN HER FIELD OF VIEW JUST OFF-CENTER, ADJACENT TO HER CENTRAL VISION. THE SURGEON STATES THE "HOLE" OF THE LENS IS "VERY CLOS…
https://www.accessdata.fda.gov/scripts/cdrh/cfdocs/cfMAUDE/Detail.CFM?MDRFOI__ID=7336508&pc=MTA	2023826-2018-00414		Malfunction	STAAR SURGICAL COMPANY	2018-03-13	MTA	IMPLANTABLE COLLAMER LENS (ICL)	Device Operates Differently Than Expected	Blurred Vision	NA	1	Event Description: THE REPORTER INDICATED THE SURGEON IMPLANTED AN ICL IMPLANTABLE COLLAMER LENS, IN THE PATIENT'S LEFT EYE (OS). THE REPORTER INDICATED THERE WAS A REFRACTIVE SURPRISE. THE LENS REMAINS IMPLANTED BUT THE SURGEON PLANS TO EXPLANT THE LENS. ADDITIONAL INFORMATION HAS BEEN REQUESTED BUT NONE HAS BEEN FORTHCOMING. IF ADDITIONAL INFORMATION IS RECEIVED, A SUPPLEMENTAL MEDWATCH WILL BE…
https://www.accessdata.fda.gov/scripts/cdrh/cfdocs/cfMAUDE/Detail.CFM?MDRFOI__ID=7336510&pc=MTA	2023826-2018-00413		Malfunction	STAAR SURGICAL COMPANY	2018-03-13	MTA	IMPLANTABLE COLLAMER LENS (ICL)	Device Operates Differently Than Expected	Blurred Vision	NA	1	Event Description: THE REPORTER INDICATED THE SURGEON IMPLANTED AN ICL IMPLANTABLE COLLAMER LENS, IN THE PATIENT'S RIGHT EYE (OD). THE REPORTER INDICATED THERE WAS A REFRACTIVE SURPRISE. THE LENS REMAINS IMPLANTED BUT THE SURGEON PLANS TO EXPLANT THE LENS. ADDITIONAL INFORMATION HAS BEEN REQUESTED BUT NONE HAS BEEN FORTHCOMING. IF ADDITIONAL INFORMATION IS RECEIVED, A SUPPLEMENTAL MEDWATCH WILL B…
https://www.accessdata.fda.gov/scripts/cdrh/cfdocs/cfMAUDE/Detail.CFM?MDRFOI__ID=7336522&pc=MTA	2023826-2018-00410		Malfunction	STAAR SURGICAL COMPANY	2018-03-13	MTA	IMPLANTABLE COLLAMER LENS (ICL)	Device Operates Differently Than Expected	Blurred Vision	NA	1	Event Description: THE REPORTER INDICATED THE SURGEON IMPLANTED AN ICL IMPLANTABLE COLLAMER LENS, IN THE PATIENT'S LEFT EYE (OS). THE REPORTER INDICATED THERE WAS A REFRACTIVE SURPRISE. THE LENS REMAINS IMPLANTED BUT THE SURGEON PLANS TO EXPLANT THE LENS. ADDITIONAL INFORMATION HAS BEEN REQUESTED BUT NONE HAS BEEN FORTHCOMING. IF ADDITIONAL INFORMATION IS RECEIVED, A SUPPLEMENTAL MEDWATCH WILL BE…
https://www.accessdata.fda.gov/scripts/cdrh/cfdocs/cfMAUDE/Detail.CFM?MDRFOI__ID=7336540&pc=MTA	2023826-2018-00411		Malfunction	STAAR SURGICAL COMPANY	2018-03-13	MTA	IMPLANTABLE COLLAMER LENS (ICL)	Device Operates Differently Than Expected	Blurred Vision	NA	1	Event Description: THE REPORTER INDICATED THE SURGEON IMPLANTED AN ICL IMPLANTABLE COLLAMER LENS, IN THE PATIENT'S RIGHT EYE (OD). THE REPORTER INDICATED THERE WAS A REFRACTIVE SURPRISE. THE LENS REMAINS IMPLANTED BUT THE SURGEON PLANS TO EXPLANT THE LENS. ADDITIONAL INFORMATION HAS BEEN REQUESTED BUT NONE HAS BEEN FORTHCOMING. IF ADDITIONAL INFORMATION IS RECEIVED, A SUPPLEMENTAL MEDWATCH WILL B…
https://www.accessdata.fda.gov/scripts/cdrh/cfdocs/cfMAUDE/Detail.CFM?MDRFOI__ID=7085101&pc=MTA	2023826-2017-01850	2017-10-31	Malfunction	STAAR SURGICAL COMPANY	2017-12-05	MTA	IMPLANTABLE COLLAMER LENS (ICL)	Device Operates Differently Than Expected; Adverse Event Without Identified Device or Use Problem	Blurred Vision	NA	1	Event Description: THE REPORTER INDICATED THE SURGEON IMPLANTED A 12.1MM VTICH12.1 IMPLANTABLE COLLAMER LENS, +4.0/+3.5/092 DIOPTER, IN THE PATIENT'S LEFT EYE (OS), ON (B)(6) 2017. THE REPORTER INDICATED THE LENS HAD A REFRACTIVE SURPRISE AND THE LENS REMAINS IMPLANTED. THE PATIENT'S POST-OP BEST-CORRECTED VISUAL ACUITY WAS 20/30. ADDITIONAL INFORMATION HAS BEEN REQUESTED BUT NONE HAS BEEN FORTHC…
https://www.accessdata.fda.gov/scripts/cdrh/cfdocs/cfMAUDE/Detail.CFM?MDRFOI__ID=7398188&pc=MTA	2023826-2018-00497	2018-02-20	Malfunction	STAAR SURGICAL COMPANY	2018-04-04	MTA	IMPLANTABLE COLLAMER LENS (ICL)	Device Operates Differently Than Expected; Adverse Event Without Identified Device or Use Problem	Blurred Vision	N/A	1	Event Description: THE REPORTER INDICATED THAT THE SURGEON IMPLANTED A 12.6 MM VTICMO12.6, -3.50/5.5/107 (SPHERE/CYLINDER/AXIS), IMPLANTABLE COLLAMER LENS IN THE PATIENT'S RIGHT EYE (OD) ON (B)(6) 2018. IT WAS NOTICED THE THE "REFRACTIVE IS STILL THE SAME AS BEFORE DURING SURGERY" AND THERE IS ALMOST NO CORRECTION. LENS REMAINS IMPLANTED. Manufacturer Narrative: THE REPORTER INDICATED THAT THE SU…
https://www.accessdata.fda.gov/scripts/cdrh/cfdocs/cfMAUDE/Detail.CFM?MDRFOI__ID=7398192&pc=MTA	2023826-2018-00498	2018-02-20	Malfunction	STAAR SURGICAL COMPANY	2018-04-04	MTA	IMPLANTABLE COLLAMER LENS (ICL)	Device Operates Differently Than Expected; Adverse Event Without Identified Device or Use Problem	Blurred Vision	N/A	1	Event Description: THE REPORTER INDICATED THAT THE SURGEON IMPLANTED A 12.6 MM VTICMO12.6, -4.00/3.0/119 (SPHERE/CYLINDER/AXIS), IMPLANTABLE COLLAMER LENS IN THE PATIENT'S LEFT EYE (OS) ON (B)(6) 2018. IT WAS NOTICED THE "REFRACTIVE IS STILL THE SAME AS BEFORE DURING SURGERY" AND THERE IS ALMOST NO CORRECTION. LENS REMAINS IMPLANTED. Manufacturer Narrative: THE REPORTER INDICATED THAT THE SURGEON…
https://www.accessdata.fda.gov/scripts/cdrh/cfdocs/cfMAUDE/Detail.CFM?MDRFOI__ID=6108230&pc=MTA	2023826-2016-01651	2016-10-14	Injury	STAAR SURGICAL COMPANY	2016-11-16	MTA	ICL (IMPLANTABLE COLLAMER LENS)	Device Operates Differently Than Expected; Appropriate Term/Code Not Available	Blurred Vision	NA	1	Event Description: THE REPORTER INDICATED THE SURGEON IMPLANTED A 13.2MM VTICM5 3.2 IMPLANTABLE COLLAMER LENS, -11.00/+1.5/074 DIOPTER, IN THE PATIENT'S RIGHT EYE (OD) ON (B)(6) 2016. THE REPORTER INDICATED THERE WAS A REFRACTIVE SURPRISE AND THE LENS REMAINS IMPLANTED. Manufacturer Narrative: CONCLUSION CODE: PREVIOUSLY, IT WAS REPORTED THAT THE CONCLUSION CODE. THIS IS INCORRECT. THE CORRECT CO…
https://www.accessdata.fda.gov/scripts/cdrh/cfdocs/cfMAUDE/Detail.CFM?MDRFOI__ID=6223864&pc=MTA	2023826-2017-00021	2016-12-07	Injury	STAAR SURGICAL COMPANY	2017-01-04	MTA	ICL (IMPLANTABLE COLLAMER LENS)	Device Operates Differently Than Expected; Appropriate Term/Code Not Available	Blurred Vision	N/A	1	Event Description: THE REPORTER INDICATED THAT THE SURGEON IMPLANTED A 13.2MM VTICMO13.2 IMPLANTABLE COLLAMER LENS, -12.50/+2.0/066 DIOPTER, IN THE PATIENT'S RIGHT EYE ON (B)(6) 2016. THE PATIENT EXPERIENCED REFRACTIVE SURPRISE. Manufacturer Narrative: (B)(4). Manufacturer Narrative: THIS PRODUCT IS MANUFACTURED IN THE U.S. BUT NOT MARKETED IN THE U.S. (B)(4). LENS NOT RETURNED.
https://www.accessdata.fda.gov/scripts/cdrh/cfdocs/cfMAUDE/Detail.CFM?MDRFOI__ID=7089425&pc=MTA	2023826-2017-01830	2017-11-07	Malfunction	STAAR SURGICAL COMPANY	2017-12-06	MTA	IMPLANTABLE COLLAMER LENS (ICL)	Device Operates Differently Than Expected; Device Dislodged or Dislocated	Blurred Vision	N/A	1	Event Description: THE REPORTER INDICATED THAT THE SURGERY IMPLANTED A 13.2 MM VTICM5_13.2, -4.5/+4.5/075 DIOPTER, IMPLANTABLE COLLAMER LENS IN THE PATIENT'S LEFT EYE (OS) ON (B)(6) 2017. ON (B)(6) 2017, LENS ROTATION NOT ASSOCIATED TO A LOW VAULT AS WELL AS REFRACTIVE SURPRISE WAS NOTICED. THE LENS IS PLANNED TO BE REPOSITIONED. Manufacturer Narrative: CLAIM# (B)(4). Manufacturer Narrative: THIS…
https://www.accessdata.fda.gov/scripts/cdrh/cfdocs/cfMAUDE/Detail.CFM?MDRFOI__ID=6227635&pc=MTA	2023826-2017-00016	2016-11-18	Injury	STAAR SURGICAL COMPANY	2017-01-05	MTA	IMPLANTABLE COLLAMER LENS	Device Operates Differently Than Expected; Insufficient Information	Blurred Vision	NA	1	Event Description: THE REPORTER INDICATED THAT THE SURGEON IMPLANTED A 12.6MM VTICMO12.6 IMPLANTABLE COLLAMER LENS, -14.0/+3.0/78 DIOPTER, INTO THE PATIENT'S LEFT EYE (OS) ON (B)(6) 2016. AFTER IMPLANTATION, THE PATIENT EXPERIENCED REFRACTIVE SURPRISE. AS OF THE DATE OF MDR SUBMISSION, THE LENS REMAINS IMPLANTED IN THE PATIENT. Manufacturer Narrative: ADDITIONAL DATA: WORK ORDER SEARCH: NO SIMILA…
https://www.accessdata.fda.gov/scripts/cdrh/cfdocs/cfMAUDE/Detail.CFM?MDRFOI__ID=4542565&pc=MTA	2023826-2015-00174	2014-12-01	Injury	STAAR SURGICAL COMPANY	2015-02-24	MTA	ICL (IMPLANTABLE COLLAMER LENS)	Inadequacy of Device Shape and/or Size	Blurred Vision	P030016	1	Event Description: THE REPORTER INDICATED THE SURGEON IMPLANTED A 13.0MM ICM130V4 IMPLANTABLE COLLAMER LENS IN THE PATIENT'S RIGHT EYE (OD) ON (B)(6) 2014. THE LENS WAS EXPLANTED ON (B)(6) 2014 DUE TO EXCESSIVE VAULTING. THE PATIENT EXPERIENCED REFRACTIVE CHANGE OVERTIME (OVERCORRECTION) AND BLURRED VISION. THE ICL WAS EXCHANGED FOR ANOTHER SAME MODEL LENS BUT A DIFFERENT DIOPTER POWER (-15.5), W…
https://www.accessdata.fda.gov/scripts/cdrh/cfdocs/cfMAUDE/Detail.CFM?MDRFOI__ID=7201639&pc=MTA	2023826-2018-00086	2017-11-16	Malfunction	STAAR SURGICAL COMPANY	2018-01-17	MTA	IMPLANTABLE COLLAMER LENS	Inadequacy of Device Shape and/or Size	Blurred Vision	N/A	1	Event Description: THE REPORTER STATED THAT THE SURGEON IMPLANTED A 12.1MM VTICMO12.1, -1.5/+1.50/079 (SPHERE/CYLINDER/AXIS) INTO THE PATIENT'S RIGHT EYE (OD) ON (B)(6) 2017. THE SURGEON NOTED REFRACTIVE SURPRISE AND EXCESSIVE VAULT. IN ADDITION, THE ICL WAS IMPLANTED "IN A PIGGY-BACK CONDITION." REPORTEDLY, LENS REMAINS IMPLANTED. Manufacturer Narrative: PMA 510(K): THIS PRODUCT IS NOT MARKETED …
https://www.accessdata.fda.gov/scripts/cdrh/cfdocs/cfMAUDE/Detail.CFM?MDRFOI__ID=7180685&pc=MTA	2023826-2018-00036	2017-12-11	Malfunction	STAAR SURGICAL COMPANY	2018-01-10	MTA	IMPLANTABLE COLLAMER LENS (ICL)	Inadequacy of Device Shape and/or Size	Blurred Vision	N/A	1	Event Description: THE REPORTER INDICATED THE SURGEON IMPLANTED A 12.0MM ICM120V4 IMPLANTABLE COLLAMER LENS, DIOPTER -13.0 INTO THE PATIENT'S LEFT EYE (OS) ON (B)(6) 2008. THE SURGEON REPORTS LOW VAULT AND REFRACTIVE SURPRISE; INCIDENT DATE OF (B)(6) 2017. Manufacturer Narrative: THE PRODUCT IS MANUFACTURED IN THE US, BUT NOT MARKETED IN THE US. CONCLUSION CODE: OFF-LABEL USE [UNDER 21 YEARS OF A…
https://www.accessdata.fda.gov/scripts/cdrh/cfdocs/cfMAUDE/Detail.CFM?MDRFOI__ID=7180690&pc=MTA	2023826-2018-00037	2017-12-11	Malfunction	STAAR SURGICAL COMPANY	2018-01-10	MTA	IMPLANTABLE COLLAMER LENS (ICL)	Inadequacy of Device Shape and/or Size	Blurred Vision	N/A	1	Event Description: THE REPORTER INDICATED THE SURGEON IMPLANTED A 11.5MM ICM115V4 IMPLANTABLE COLLAMER LENS, DIOPTER -12.0 INTO THE PATIENT'S RIGHT EYE (OD) ON (B)(6) 2008. THE SURGEON REPORTS LOW VAULT AND REFRACTIVE SURPRISE; INCIDENT DATE OF (B)(6) 2017. Manufacturer Narrative: CORRECTED INFORMATION: THE LENS REMAINS IMPLANTED. THE LENS IS PLANNED TO BE EXCHANGED. CLAIM# (B)(4). Manufacturer N…
https://www.accessdata.fda.gov/scripts/cdrh/cfdocs/cfMAUDE/Detail.CFM?MDRFOI__ID=7336748&pc=MTA	2023826-2018-00377	2018-02-01	Malfunction	STAAR SURGICAL COMPANY	2018-03-13	MTA	IMPLANTABLE COLLAMER LENS (ICL)	Inadequacy of Device Shape and/or Size	Blurred Vision	N/A	1	Event Description: THE REPORTER INDICATED THAT THE SURGEON IMPLANTED A 12.6MM VTICMO12.6, -13.0/+2.5/088 (SPHERE/CYLINDER/AXIS) IMPLANTABLE COLLAMER LENS, INTO THE PATIENT'S LEFT EYE (OS) ON (B)(6) 2018. THE SURGEON REPORTS LOW VAULT AND REFRACTIVE SURPRISE. REPORTEDLY, THE LENS REMAINS IMPLANTED. Manufacturer Narrative: THIS PRODUCT IS MANUFACTURED BUT NOT MARKETED IN THE U.S. (B)(4).
https://www.accessdata.fda.gov/scripts/cdrh/cfdocs/cfMAUDE/Detail.CFM?MDRFOI__ID=8052129&pc=MTA	2023826-2018-01618	2018-10-08 04:00:00	Injury	STAAR SURGICAL COMPANY	2018-11-08 05:00:00	MTA	IMPLANTABLE COLLAMER LENS (ICL)	Inadequacy of Device Shape and/or Size	Blurred Vision	N/A	1	Event Description: THE REPORTER INDICATED THAT A 13.2MM, VTICMO13.2, -2.50/6.0/168 (SPHERE/CYLINDER/AXIS) , IMPLANTABLE COLLAMER LENS WAS IMPLANTED INTO THE PATIENT'S RIGHT EYE (OD) ON (B)(6) 2018. ON (B)(6) 2018 THE LENS WAS EXPLANTED DUE TO EXCESSIVE VAULT AND LOSS OF BCVA; THIS EXPLANT RESOLVED THE PROBLEM. IT WAS REPORTED THAT THE PATIENT IS DOING FINE AFTER EXPLANTATION. Manufacturer Narrati…
https://www.accessdata.fda.gov/scripts/cdrh/cfdocs/cfMAUDE/Detail.CFM?MDRFOI__ID=10524328&pc=MTA	2023826-2020-02041	2020-08-03 04:00:00	Injury	STAAR SURGICAL COMPANY	2020-09-11 04:00:00	MTA	IMPLANTABLE COLLAMER LENS (ICL)	Inadequacy of Device Shape and/or Size	Blurred Vision	N/A#S-P#N/A	1	Event Description: THE REPORTER INDICATED THAT A 12.6MM, VICM5_12.6, -4.00, IMPLANTABLE COLLAMER LENS WAS IMPLANTED INTO THE PATIENT'S RIGHT EYE (OD) ON (B)(6) 2017. LOW VAULT AND REFRACTIVE CHANGE OVER TIME WERE REPORTED. THE LENS REMAINS IMPLANTED. Manufacturer Narrative: B5-UPDATED INFORMATION: ON (B)(6) 2020 THE LENS WAS EXCHANGED WITH A LONGER LENS AND PROBLEM WAS RESOLVED. CLAIM# (B)(4). Ma…
https://www.accessdata.fda.gov/scripts/cdrh/cfdocs/cfMAUDE/Detail.CFM?MDRFOI__ID=10524391&pc=MTA	2023826-2020-02040	2020-08-03 04:00:00	Injury	STAAR SURGICAL COMPANY	2020-09-11 04:00:00	MTA	IMPLANTABLE COLLAMER LENS (ICL)	Inadequacy of Device Shape and/or Size	Blurred Vision	N/A#S-P#N/A	1	Event Description: THE REPORTER INDICATED THAT A 12.6MM, VICM5_12.6, -4.50, IMPLANTABLE COLLAMER LENS WAS IMPLANTED INTO THE PATIENT'S LEFT EYE (OS) ON (B)(6) 2017. LOW VAULT AND REFRACTIVE CHANGE OVER TIME WERE REPORTED. THE LENS REMAINS IMPLANTED. Manufacturer Narrative: B5-UPDATED INFORMATION: ON (B)(6) 2020 THE LENS WAS EXCHANGED WITH A LONGER LENS AND THE PROBLEM WAS RESOLVED. CLAIM# (B)(4).…
https://www.accessdata.fda.gov/scripts/cdrh/cfdocs/cfMAUDE/Detail.CFM?MDRFOI__ID=16030056&pc=MTA	2023826-2022-04436	2021-04-08 04:00:00	Injury	STAAR SURGICAL COMPANY	2022-12-21 05:00:00	MTA	IMPLANTABLE COLLAMER LENS (ICL)	Inadequacy of Device Shape and/or Size	Blurred Vision	P030016	1	Event Description: THE REPORTER INDICATED THAT A 12.6MM VICMO12.6 IMPLANTABLE COLLAMER LENS -8.00 DIOPTER WAS IMPLANTED INTO THE PATIENT'S LEFT EYE (OS) ON (B)(6) 2019. ON (B)(6) 2021 THE LENS WAS EXCHANGED FOR A LONGER LENGTH LENS OF DIFFERENT POWER DUE TO LOW VAULT AND REFRACTIVE SURPRISE. THIS EXCHANGED RESOLVED THE PROBLEM. CAUSE OF EVENT WAS UNKNOWN. Manufacturer Narrative: LENS WORK ORDER S…
https://www.accessdata.fda.gov/scripts/cdrh/cfdocs/cfMAUDE/Detail.CFM?MDRFOI__ID=12029739&pc=MTA	2023826-2021-01917	2021-05-17 04:00:00	Injury	STAAR SURGICAL COMPANY	2021-06-19 04:00:00	MTA	IMPLANTABLE COLLAMER LENS (ICL)	Inadequacy of Device Shape and/or Size	Blurred Vision	NA	1	Event Description: THE REPORTER INDICATED THAT A 12.6MM, VICM5_12.6, -3.50 DIOPTER, IMPLANTABLE COLLAMER LENS WAS IMPLANTED INTO THE PATIENTS LEFT EYE (OS) ON (B)(6) 2020. LOW VAULT AND REFRACTIVE CHANGE OVERTIME WAS OBSERVED. LENS REMAINS IMPLANTED. IF ADDITIONAL INFORMATION IS RECEIVED A SUPPLEMENTAL MEDWATCH REPORT WILL BE SUBMITTED. Manufacturer Narrative: B5- THE REPORTER INDICATED THAT A 12…
https://www.accessdata.fda.gov/scripts/cdrh/cfdocs/cfMAUDE/Detail.CFM?MDRFOI__ID=7051045&pc=MTA	2023826-2017-01755	2017-09-30	Injury	STAAR SURGICAL COMPANY	2017-11-21	MTA	IMPLANTABLE COLLAMER LENS (ICL)	Inadequacy of Device Shape and/or Size; Device Dislodged or Dislocated	Blurred Vision	NA	1	Event Description: THE REPORTER INDICATED THE SURGEON IMPLANTED A 12.6MM VTICMO12.6 IMPLANTABLE COLLAMER LENS, -12.0/+1.0/099 DIOPTER, IN THE PATIENT'S LEFT EYE (OS) ON (B)(6) 2017. THE REPORTER INDICATED THE LENS HAD LOW VAULTING AND LENS ROTATION. THE PATIENT COMPLAINED OF BLURRY VISION. THE LENS REMAINS IMPLANTED. Manufacturer Narrative: THE REPORTER STATED THAT THE EXCHANGE IS LIKELY TO BE IN…
https://www.accessdata.fda.gov/scripts/cdrh/cfdocs/cfMAUDE/Detail.CFM?MDRFOI__ID=6877224&pc=MTA	2023826-2017-01462	2016-02-18	Injury	STAAR SURGICAL COMPANY	2017-09-19	MTA	IMPLANTABLE COLLAMER LENS (ICL)	Inadequacy of Device Shape and/or Size; Device Operates Differently Than Expected	Blurred Vision	N/A	1	Event Description: THE REPORTER INDICATED THAT THE SURGEON IMPLANTED A 12.6MM VTICMO12.6, DIOPTER -13.5/+1.5/080 IMPLANTABLE COLLAMER LENS, INTO THE PATIENT'S LEFT EYE (OS) ON (B)(6) 2014. THE PATIENT BEGAN EXPERIENCING GLARE/HALOES AND BLURRED VISION. ON (B)(6) 2016 THE LENS WAS EXCHANGED FOR THE SAME SIZE, SIMILAR DIOPTER LENS. THE PROBLEM WAS RESOLVED. Manufacturer Narrative: PATIENT POST-OP B…
https://www.accessdata.fda.gov/scripts/cdrh/cfdocs/cfMAUDE/Detail.CFM?MDRFOI__ID=7135239&pc=MTA	2023826-2017-01925		Malfunction	STAAR SURGICAL COMPANY	2017-12-20	MTA	IMPLANTABLE COLLAMER LENS	Inadequacy of Device Shape and/or Size; Device Operates Differently Than Expected	Blurred Vision	N/A	1	Event Description: THE REPORTER STATED THAT THE SURGEON IMPLANTED A 13.2MM VTICMO13.2, -5.5/+5.5/082 (SPHERE/CYLINDER/AXIS) INTO THE PATIENT'S RIGHT EYE (OD) ON (B)(6) 2017. THE SURGEON NOTED REFRACTIVE SURPRISE AND STATES "IN SPITE OF NORMAL VAULT POST-OP DATA" HE BELIEVES THE CURRENT LENS IS LARGER THAN NEEDED. THE SURGEON NOTES THE OPTIC PART OF THE LENS IN THE INFERIROR SIGMENT IS "A BIT OBTR…
https://www.accessdata.fda.gov/scripts/cdrh/cfdocs/cfMAUDE/Detail.CFM?MDRFOI__ID=7135248&pc=MTA	2023826-2017-01926		Malfunction	STAAR SURGICAL COMPANY	2017-12-20	MTA	IMPLANTABLE COLLAMER LENS	Inadequacy of Device Shape and/or Size; Device Operates Differently Than Expected	Blurred Vision	N/A	1	Event Description: THE REPORTER STATED THAT THE SURGEON IMPLANTED A 13.2MM VTICMO13.2, -7.0/+6.0/079 (SPHERE/CYLINDER/AXIS) INTO THE PATIENT'S LEFT EYE (OS) ON (B)(6) 2017. THE SURGEON NOTED REFRACTIVE SURPRISE AND STATES "IN SPITE OF NORMAL VAULT POST-OP DATA" HE BELIEVES THE CURRENT LENS IS LARGER THAN NEEDED. THE SURGEON NOTES THE OPTIC PART OF THE LENS IN THE INFERIOR SIGMENT IS "A BIT OBTRUS…
https://www.accessdata.fda.gov/scripts/cdrh/cfdocs/cfMAUDE/Detail.CFM?MDRFOI__ID=6227617&pc=MTA	2023826-2017-00022	2016-11-29	Injury	STAAR SURGICAL COMPANY AG	2017-01-05	MTA	IMPLANTABLE COLLAMER LENS (ICL)	Inadequacy of Device Shape and/or Size; Device Operates Differently Than Expected; Device Dislodged or Dislocated	Blurred Vision	NA	1	Event Description: THE REPORTER INDICATED THAT THE SURGEON IMPLANTED A 13.7MM VTICMO13.7 IMPLANTABLE COLLAMER LENS, INTO THE PATIENT'S LEFT EYE (OS) ON (B)(6) 2016. ON (B)(6) 2016 ,THE PATIENT REPORTED LOW VAULT, ROTATION OF THE LENS, AND REFRACTIVE SURPRISE.. Manufacturer Narrative: METHOD: WORK ORDER SEARCH. RESULT: NO SIMILAR COMPLAINTS FOUND. (B)(4). Manufacturer Narrative: (B)(4). Manufactur…
https://www.accessdata.fda.gov/scripts/cdrh/cfdocs/cfMAUDE/Detail.CFM?MDRFOI__ID=17592022&pc=MTA	2023826-2023-03621	2023-07-19 04:00:00	Injury	STAAR SURGICAL COMPANY	2023-08-21 04:00:00	MTA	IMPLANTABLE COLLAMER LENS (ICL)	Inadequacy of Device Shape and/or Size; Patient-Device Incompatibility	Blurred Vision	P030016	1	Event Description: THE REPORTER INDICATED THAT A 12.6MM VICMO12.6 IMPLANTABLE COLLAMER LENS OF -11.0 DIOPTER WAS IMPLANTED INTO THE PATIENT'S RIGHT EYE (OD) ON (B)(6) 2023. IN A SUBSEQUENT SURGERY LATER THAT DAY, THE LENS WAS EXCHANGED FOR A LONGER LENGTH LENS DUE LOW VAULT WITHOUT ROTATION. THE PROBLEM WAS RESOLVED. CAUSE OF THE EVENT WAS A PATIENT RELATED FACTOR. Manufacturer Narrative: CORRECT…
https://www.accessdata.fda.gov/scripts/cdrh/cfdocs/cfMAUDE/Detail.CFM?MDRFOI__ID=6227640&pc=MTA	2023826-2017-00017	2016-12-07	Injury	STAAR SURGICAL COMPANY	2017-01-05	MTA	IMPLANTABLE COLLAMER LENS	Insufficient Information	Blurred Vision	NA	1	Event Description: THE REPORTER INDICATED THAT THE SURGEON IMPLANTED A 13.2MM VTICMO13.2 IMPLANTABLE COLLAMER LENS, -11.5/2.0/152 DIOPTER, INTO THE PATIENT'S LEFT EYE (OS) ON (B)(6) 2016. ON (B)(6) 2016, THE PATIENT EXPERIENCED REFRACTIVE SURPRISE. AS OF THE DATE OF MDR SUBMISSION, THE LENS REMAINS IMPLANTED IN THE PATIENT. ADDITIONALLY, THE COMPLAINT FORM STATES, "CUSTOMER MIXED UP THE CALCULATI…
https://www.accessdata.fda.gov/scripts/cdrh/cfdocs/cfMAUDE/Detail.CFM?MDRFOI__ID=6242804&pc=MTA	2023826-2017-00041	2016-12-10	Injury	STAAR SURGICAL COMPANY	2017-01-11	MTA	IMPLANTABLE COLLAMER LENS	Insufficient Information	Blurred Vision	NA	1	Event Description: THE REPORTER INDICATED THAT THE SURGEON IMPLANTED A 12.1MM VTICMO12.1 IMPLANTABLE COLLAMER LENS, -10.5/+3.0/82 DIOPTER, INTO THE PATIENT'S RIGHT EYE (OD) ON (B)(6) 2016. ON (B)(6) 2016, THE PATIENT EXPERIENCED REFRACTIVE SURPRISE. AS OF THE DATE OF MDR SUBMISSION, THE LENS REMAINS IMPLANTED IN THE PATIENT AMD THEREFORE, HAS NOT BEEN RETURNED FOR EVALUATION. Manufacturer Narrati…
https://www.accessdata.fda.gov/scripts/cdrh/cfdocs/cfMAUDE/Detail.CFM?MDRFOI__ID=6242817&pc=MTA	2023826-2017-00039	2016-12-10	Injury	STAAR SURGICAL COMPANY	2017-01-11	MTA	IMPLANTABLE COLLAMER LENS	Insufficient Information	Blurred Vision	NA	1	Event Description: THE REPORTER INDICATED THAT THE SURGEON IMPLANTED A 12.1 MM VTICMO12.1 IMPLANTABLE COLLAMER LENS, -10.5/+3.0/81 DIOPTER, INTO THE PATIENT'S LEFT EYE (OS) ON (B)(6) 2016. ON (B)(6) 2016, THE PATIENT EXPERIENCED REFRACTIVE SURPRISE. AS OF THE DATE OF MDR SUBMISSION, THE LENS REMAINS IMPLANTED IN THE PATIENT AND THEREFORE, HAS NOT BEEN RETURNED FOR EVALUATION. Manufacturer Narrati…
https://www.accessdata.fda.gov/scripts/cdrh/cfdocs/cfMAUDE/Detail.CFM?MDRFOI__ID=15784581&pc=MTA	2023826-2022-04080	2018-03-27 04:00:00	Injury	STAAR SURGICAL COMPANY	2022-11-11 05:00:00	MTA	IMPLANTABLE COLLAMER LENS (ICL)	Misfocusing	Blurred Vision	P030016	1	Event Description: THE REPORTER INDICATED THE SURGEON IMPLANTED A 12.6MM MICL12.6 IMPLANTABLE COLLAMER LENS, -06.50 DIOPTER, IN THE PATIENTS LEFT EYE (OS) ON (B)(6) 2018. THE PATIENT EXPERIENCED A REFRACTIVE SURPRISE AND BLURRED VISION. THE CAUSE OF THE EVENT WAS DUE TO THE DEVICE. ADDITIONAL INFORMATION HAS BEEN REQUESTED BUT NONE HAS BEEN FORTHCOMING. Manufacturer Narrative: (B)(4). CLAIM # (B)…
https://www.accessdata.fda.gov/scripts/cdrh/cfdocs/cfMAUDE/Detail.CFM?MDRFOI__ID=11823161&pc=MTA	2023826-2021-01483	2018-04-02	Injury	STAAR SURGICAL COMPANY	2021-05-13	MTA	IMPLANTABLE COLLAMER LENS	Misfocusing	Blurred Vision	NA	1	Event Description: THE REPORTER INDICATED THAT THE SURGEON IMPLANTED A 13.2MM VICMO13.2 IMPLANTABLE COLLAMER LENS, -11.5 DIOPTER, INTO THE PATIENT'S LEFT EYE (OS) ON (B)(6) 2017. ON (B)(6) 2018 THE LENS WAS EXCHANGED WITH A SAME SIZE DIFFERENT DIOPTER LENS DUE TO REFRACTIVE SURPRISE. THE PROBLEM WAS RESOLVED. THE CAUSE OF THE EVENT IS REPORTED AS UNKNOWN. Manufacturer Narrative: PMA/510(K): THIS …
https://www.accessdata.fda.gov/scripts/cdrh/cfdocs/cfMAUDE/Detail.CFM?MDRFOI__ID=11751185&pc=MTA	2023826-2021-01281	2018-04-28 04:00:00	Injury	STAAR SURGICAL COMPANY	2021-04-30 04:00:00	MTA	IMPLANTABLE COLLAMER LENS (ICL)	Misfocusing	Blurred Vision	NA	1	Event Description: THE REPORTER INDICATED THAT A 13.2MM, VICMO13.2, -11.00 DIOPTER, IMPLANTABLE COLLAMER LENS WAS IMPLANTED INTO THE PATIENTS LEFT EYE (OS) ON (B)(6) 2017. ON (B)(6) 2018 THE LENS WAS EXCHANGED FOR A DIFFERENT MODEL AND DIOPTER LENS DUE TO REFRACTIVE SURPRISE. THIS EXCHANGE RESOLVED THE PROBLEM. CAUSE OF EVENT WAS REPORTER AS UNKNOWN. Manufacturer Narrative: ADDITIONAL INFORMATION…
https://www.accessdata.fda.gov/scripts/cdrh/cfdocs/cfMAUDE/Detail.CFM?MDRFOI__ID=7696925&pc=MTA	2023826-2018-01042	2018-06-18	Injury	STAAR SURGICAL COMPANY	2018-07-17	MTA	IMPLANTABLE COLLAMER LENS	Misfocusing	Blurred Vision	NA	1	Event Description: THE REPORTER INDICATED THAT THE SURGEON IMPLANTED A 13.2MM VICM6_13.2 IMPLANTABLE COLLAMER LENS, -5.5 DIOPTER INTO THE PATIENT'S RIGHT EYE (OD) ON (B)(6) 2018. THE SURGEON REPORTS A 2-LINE DROP IN BCDVA COMPARED TO THE PREOPERATIVE EXAM. THE LENS REMAINS IMPLANTED AND THE INVESTIGATION IS ONGOING. Manufacturer Narrative: ADDITIONAL INFORMATION: IN THE SURGEON'S OPINION, THE CAU…
https://www.accessdata.fda.gov/scripts/cdrh/cfdocs/cfMAUDE/Detail.CFM?MDRFOI__ID=7783494&pc=MTA	2023826-2018-01202	2018-07-18	Malfunction	STAAR SURGICAL COMPANY	2018-08-14	MTA	IMPLANTABLE COLLAMER LENS (ICL)	Misfocusing	Blurred Vision	N/A	1	Event Description: THE REPORTER INDICATED THE SURGEON IMPLANTED A 12.6MM VTICM5_12.6 IMPLANTABLE COLLAMER LENS, -9.5/+4.0/094 (SPHERE/CYLINDER/AXIS) INTO THE PATIENT'S LEFT EYE (OS) ON (B)(6) 2018. REPORTEDLY, THE PATIENT IS NOT SATISFIED WITH THE VISION BECAUSE IT IS DIFFERENT FROM THE EXPECTED REFRACTION. Manufacturer Narrative: THE PRODUCT IS MANUFACTURED IN THE US, BUT NOT MARKETED IN THE US.…
https://www.accessdata.fda.gov/scripts/cdrh/cfdocs/cfMAUDE/Detail.CFM?MDRFOI__ID=7799794&pc=MTA	2023826-2018-01251	2018-07-26	Injury	STAAR SURGICAL COMPANY	2018-08-20	MTA	IMPLANTABLE COLLAMER LENS	Misfocusing	Blurred Vision	NA	1	Event Description: THE REPORTER INDICATED THAT THE SURGEON IMPLANTED A 13.2MM VICM6_13.2 IMPLANTABLE COLLAMER LENS, -4.5 DIOPTER INTO THE PATIENT'S LEFT EYE (OS) ON (B)(6) 2018. REPORTEDLY, THERE WAS A >/= 2-LINE DROP IN BCDVA NOTED AT THE PATIENT'S 1-MONTH POSTOPERATIVE VISIT. IN THE SURGEON'S OPINION, THE CAUSE OF THIS EVENT IS THE DEVICE. AT THE PATIENT'S LAST VISIT THE SURGEON STATES THERE IS…
https://www.accessdata.fda.gov/scripts/cdrh/cfdocs/cfMAUDE/Detail.CFM?MDRFOI__ID=11351020&pc=MTA	2023826-2021-00491	2018-08-01	Injury	STAAR SURGICAL COMPANY	2021-02-19	MTA	IMPLANTABLE COLLAMER LENS (ICL)	Misfocusing	Blurred Vision	NA	1	Event Description: THE REPORTER INDICATED THAT A 13.7MM, VICMO13.7 -14.50 DIOPTER, IMPLANTABLE COLLAMER LENS WAS IMPLANTED INTO THE PATIENTS LEFT EYE (OS) ON (B)(6) 2018. ON (B)(6) 2018 THE LENS WAS EXCHANGED FOR A DIFFERENT DIOPTER LENS DUE TO REFRACTIVE SURPRISE. THIS EXCHANGE RESOLVED THE PROBLEM. CAUSE OF EVENT WAS REPORTED AS UNKNOWN. Manufacturer Narrative: THIS PRODUCT IS NOT MARKETED IN T…
https://www.accessdata.fda.gov/scripts/cdrh/cfdocs/cfMAUDE/Detail.CFM?MDRFOI__ID=11351101&pc=MTA	2023826-2021-00492	2018-08-01	Injury	STAAR SURGICAL COMPANY	2021-02-19	MTA	IMPLANTABLE COLLAMER LENS (ICL)	Misfocusing	Blurred Vision	NA	1	Event Description: THE REPORTER INDICATED THAT A 13.7MM, VICMO13.7 -13.00 DIOPTER, IMPLANTABLE COLLAMER LENS WAS IMPLANTED INTO THE PATIENTS RIGHT EYE (OD) ON (B)(6) 2018. ON (B)(6) 2018 THE LENS WAS EXCHANGED FOR A DIFFERENT DIOPTER LENS DUE TO REFRACTIVE SURPRISE. THIS EXCHANGE RESOLVED THE PROBLEM. CAUSE OF EVENT WAS REPORTED AS UNKNOWN. Manufacturer Narrative: THIS PRODUCT IS NOT MARKETED IN …
https://www.accessdata.fda.gov/scripts/cdrh/cfdocs/cfMAUDE/Detail.CFM?MDRFOI__ID=11721899&pc=MTA	2023826-2021-01018	2018-08-04 04:00:00	Injury	STAAR SURGICAL COMPANY	2021-04-25 04:00:00	MTA	IMPLANTABLE COLLAMER LENS (ICL)	Misfocusing	Blurred Vision	N/A	1	Event Description: THE REPORTER INDICATED THAT THE SURGEON IMPLANTED A 12.6MM VICMO12.6, -09.00 DIOPTER, IMPLANTABLE COLLAMER LENS INTO THE PATIENT'S LEFT EYE (OS) ON (B)(6) 2018. THE LENS WAS EXCHANGED WITH A FOR A SAME LENGTH TORIC LENS DUE TO REFRACTIVE SURPRISE ON (B)(6) 2018. THIS RESOLVED THE PROBLEM. CAUSE OF THE EVENT IS REPORTED AS UNKNOWN. Manufacturer Narrative: DEVICE EVALUATION: THE …
https://www.accessdata.fda.gov/scripts/cdrh/cfdocs/cfMAUDE/Detail.CFM?MDRFOI__ID=8071556&pc=MTA	2023826-2018-01682	2018-09-04	Malfunction	STAAR SURGICAL COMPANY	2018-11-14	MTA	IMPLANTABLE COLLAMER LENS (ICL)	Misfocusing	Blurred Vision	N/A	1	Event Description: THE REPORTER INDICATED THAT THE SURGEON IMPLANTED A 13.2 MM VTICMO13.2, -4.00/4.0/155 (SPHERE/CYLINDER/AXIS), IMPLANTABLE COLLAMER LENS IN THE PATIENT'S LEFT EYE (OS) ON (B)(6) 2017. REFRACTIVE SURPRISE WAS NOTICED. THE LENS REMAINS IMPLANTED IN THE EYE. ADDITIONAL INFORMATION HAS BEEN REQUESTED BUT NONE HAS BEEN FORTHCOMING. IF ADDITIONAL INFORMATION IS RECEIVED A SUPPLEMENTAL…
https://www.accessdata.fda.gov/scripts/cdrh/cfdocs/cfMAUDE/Detail.CFM?MDRFOI__ID=8090071&pc=MTA	2023826-2018-01702	2018-09-24 04:00:00	Injury	STAAR SURGICAL COMPANY	2018-11-20 05:00:00	MTA	IMPLANTABLE COLLAMER LENS	Misfocusing	Blurred Vision	N/A	1	Event Description: THE REPORTER STATED THAT THE SURGEON IMPLANTED A 12.6MM VTICM5_12.6, -12.0/+4.0/072 (SPHERE/CYLINDER/AXIS) INTO THE PATIENT'S LEFT EYE (OS) ON (B)(6) 2018. THE SURGEON NOTES REFRACTIVE SURPRISE. REPORTEDLY, LENS REMAINS IMPLANTED. Manufacturer Narrative: CORRECTED DATA: EVENT - THE REPORTER STATED THAT THE SURGEON IMPLANTED A 12.6MM VTICM5_12.6 IMPLANTABLE COLLAMER LENS OF -12.…
https://www.accessdata.fda.gov/scripts/cdrh/cfdocs/cfMAUDE/Detail.CFM?MDRFOI__ID=8452978&pc=MTA	2023826-2019-00489	2018-10-02	Malfunction	STAAR SURGICAL COMPANY	2019-03-26	MTA	IMPLANTABLE COLLAMER LENS	Misfocusing	Blurred Vision	NA	1	Event Description: THE REPORTER INDICATED THAT THE SURGEON IMPLANTED A 13.2MM VICM5_13.2 IMPLANTABLE COLLAMER LENS, -4.0 DIOPTER INTO THE PATIENT'S RIGHT EYE (OD) ON (B)(6) 2018. THE SURGEON REPORTS REFRACTIVE SURPRISE. THE CAUSE OF THE EVENT IS REPORTED AS UNKNOWN. REPORTEDLY, THE LENS REMAINS IMPLANTED. Manufacturer Narrative: PRODUCT IS MANUFACTURED BUT NOT SOLD IN THE U.S. LENS WORK ORDER SEA…
https://www.accessdata.fda.gov/scripts/cdrh/cfdocs/cfMAUDE/Detail.CFM?MDRFOI__ID=11721905&pc=MTA	2023826-2021-01025	2018-10-14	Injury	STAAR SURGICAL COMPANY	2021-04-25	MTA	IMPLANTABLE COLLAMER LENS (ICL)	Misfocusing	Blurred Vision	N/A	1	Event Description: THE REPORTER INDICATED THAT THE SURGEON IMPLANTED A 12.6MM VICMO12.6, -08.50 DIOPTER, IMPLANTABLE COLLAMER LENS INTO THE PATIENT'S LEFT EYE (OS) ON (B)(6) 2017. THE LENS WAS REPLACED WITH A LONGER LENGTH LENS DUE TO REFRACTIVE CHANGE OVER TIME ON (B)(6) 2019. THIS RESOLVED THE PROBLEM.CAUSE OF THE EVENT IS REPORTED AS UNKNOWN. Manufacturer Narrative: WEIGHT: UNK. ETHNICITY: UNK…
https://www.accessdata.fda.gov/scripts/cdrh/cfdocs/cfMAUDE/Detail.CFM?MDRFOI__ID=8090052&pc=MTA	2023826-2018-01684	2018-10-20 04:00:00	Malfunction	STAAR SURGICAL COMPANY	2018-11-20 05:00:00	MTA	IMPLANTABLE COLLAMER LENS (ICL)	Misfocusing	Blurred Vision	NA	1	Event Description: THE REPORTER INDICATED THAT THE SURGEON IMPLANTED A 12.6MM VTICMO12.6 IMPLANTABLE COLLAMER LENS, -3.5/+6.0/102 (SPHERE/CYLINDER/AXIS), INTO THE PATIENT'S RIGHT EYE (OD) ON (B)(6) 2015. THE SURGEON REPORTS BLURRED VISION. REPORTEDLY, THE LENS REMAINS IMPLANTED. Manufacturer Narrative: DATE OF EVENT CORRECTED TO: "UNKNOWN". CLAIM#: (B)(4). Manufacturer Narrative: THIS PRODUCT IS …
https://www.accessdata.fda.gov/scripts/cdrh/cfdocs/cfMAUDE/Detail.CFM?MDRFOI__ID=8372545&pc=MTA	2023826-2019-00314	2018-10-23	Malfunction	STAAR SURGICAL COMPANY	2019-02-26	MTA	IMPLANTABLE COLLAMER LENS (ICL)	Misfocusing	Blurred Vision	NA	1	Event Description: THE REPORTER INDICATED THAT THE SURGEON IMPLANTED A 13.2MM VTICMO13.2 IMPLANTABLE COLLAMER LENS, -4.5/+6.0/080 (SPHERE/CYLINDER/AXIS), INTO THE PATIENT'S RIGHT EYE (OD) ON (B)(6) 2018. THE SURGEON REPORTS REFRACTIVE SURPRISE. REPORTEDLY, THE LENS REMAINS IMPLANTED AND THE CAUSE OF THE EVENT IS UNKNOWN. Manufacturer Narrative: THIS PRODUCT IS MANUFACTURED IN THE U.S. BUT NOT MAR…
https://www.accessdata.fda.gov/scripts/cdrh/cfdocs/cfMAUDE/Detail.CFM?MDRFOI__ID=8227420&pc=MTA	2023826-2019-00048	2018-11-10	Malfunction	STAAR SURGICAL COMPANY	2019-01-08	MTA	IMPLANTABLE COLLAMER LENS (ICL)	Misfocusing	Blurred Vision	NA	1	Event Description: THE REPORTER INDICATED THAT THE SURGEON IMPLANTED A 13.2MM VTICMO13.2 IMPLANTABLE COLLAMER LENS, -4.5/+4.5/178 (SPHERE/CYLINDER/AXIS), INTO THE PATIENT'S RIGHT EYE (OD) ON (B)(6) 2018. THE SURGEON REPORTS REFRACTIVE SURPRISE. Manufacturer Narrative: CORRECTED DATA: THE REPORTER INDICATED THAT THE SURGEON IMPLANTED A 13.2MM VTICMO13.2 IMPLANTABLE COLLAMER LENS -4.5/+4.5/178 (SPH…
https://www.accessdata.fda.gov/scripts/cdrh/cfdocs/cfMAUDE/Detail.CFM?MDRFOI__ID=8241988&pc=MTA	2023826-2019-00086	2018-12-17	Malfunction	STAAR SURGICAL COMPANY	2019-01-11	MTA	IMPLANTABLE COLLAMER LENS (ICL)	Misfocusing	Blurred Vision	N/A	1	Event Description: THE REPORTER INDICATED THAT A 13.2MM, VTICM5_13.2, -14.00/4.0/105 (SPHERE/CYLINDER/AXIS), IMPLANTABLE COLLAMER LENS WAS IMPLANTED INTO THE PATIENTS LEFT EYE (OS) ON (B)(6) 2018. REFRACTIVE SUPRISE WAS OBSERVED ON (B)(6) 2018. REMOVAL OF THE LENS AND EXCHANGE IS PLANNED ONCE NEW LENS IS CALCULATED. CAUSE OF THE EVENT IS REPORTED AS UNKNOWN. IF ADDITIONAL INFORMATION IS RECEIVED …
https://www.accessdata.fda.gov/scripts/cdrh/cfdocs/cfMAUDE/Detail.CFM?MDRFOI__ID=8403806&pc=MTA	2023826-2019-00366	2019-01-12	Malfunction	STAAR SURGICAL COMPANY	2019-03-08	MTA	IMPLANTABLE COLLAMER LENS (ICL)	Misfocusing	Blurred Vision	N/A	1	Event Description: THE REPORTER INDICATED THAT A 12.1MM, VTICM5_12.1, -7.00/6.0/020 (SPHERE/CYLINDER/AXIS), IMPLANTABLE COLLAMER LENS WAS IMPLANTED INTO THE PATIENTS LEFT EYE (OS) ON (B)(6) 2019. REFRACTIVE SURPRISE WAS OBSERVED. LENS REMAINS IMPLANTED. CAUSE OF THE EVENT IS REPORTED AS UNKNOWN. REPORTER STATES, "WE DON'T KNOW WHY SHE STILL HAS A REFRACTIVE CYLINDER ERROR ALTHOUGH THE LENS IS NOT…
https://www.accessdata.fda.gov/scripts/cdrh/cfdocs/cfMAUDE/Detail.CFM?MDRFOI__ID=8372275&pc=MTA	2023826-2019-00302	2019-01-19	Malfunction	STAAR SURGICAL COMPANY	2019-02-26	MTA	IMPLANTABLE COLLAMER LENS (ICL)	Misfocusing	Blurred Vision	NA	1	Event Description: THE REPORTER INDICATED THE SURGEON IMPLANTED A 13.7MM VTICMO13.7 IMPLANTABLE COLLAMER LENS, -13.00/+6.0/086 (SPHERE/CYLINDER/AXIS) IN THE PATIENT'S RIGHT EYE (OD), ON (B)(6) 2018. THE REPORTER INDICATED THE PATIENT EXPERIENCED A REFRACTIVE SURPRISE AND BLURRED VISION. THE LENS REMAINS IMPLANTED. THE REPORTER INDICATED THE CAUSE OF THE EVENT WAS DUE TO ASTIGMATIC AXIS ERROR. Man…
https://www.accessdata.fda.gov/scripts/cdrh/cfdocs/cfMAUDE/Detail.CFM?MDRFOI__ID=11351898&pc=MTA	2023826-2021-00494	2019-03-01 05:00:00	Injury	STAAR SURGICAL COMPANY	2021-02-19 05:00:00	MTA	IMPLANTABLE COLLAMER LENS (ICL)	Misfocusing	Blurred Vision	NA	1	Event Description: THE REPORTER INDICATED THAT A 12.6MM, VICMO12.6 -9.50 DIOPTER, IMPLANTABLE COLLAMER LENS WAS IMPLANTED INTO THE PATIENTS RIGHT EYE (OD) ON (B)(6) 2019. ON (B)(6) 2019. THE LENS WAS EXCHANGED FOR A DIFFERENT DIOPTER AND LENGTH LENS DUE TO REFRACTIVE SURPRISE. THIS EXCHANGE RESOLVED THE PROBLEM. CAUSE OF EVENT WAS REPORTED AS UNKNOWN. Manufacturer Narrative: H3 - DEVICE EVALUATIO…
https://www.accessdata.fda.gov/scripts/cdrh/cfdocs/cfMAUDE/Detail.CFM?MDRFOI__ID=8740571&pc=MTA	2023826-2019-01152	2019-03-22	Malfunction	STAAR SURGICAL COMPANY	2019-06-27	MTA	IMPLANTABLE COLLAMER LENS (ICL)	Misfocusing	Blurred Vision	NA	1	Event Description: THE REPORTER INDICATED THE SURGEON IMPLANTED A 13.2MM VICM5_13.2 IMPLANTABLE COLLAMER LENS, - 08.00 DIOPTER IN THE PATIENT'S LEFT EYE (OS), ON (B)(6) 2019. THE PATIENT EXPERIENCED A REFRACTIVE SURPRISE. THE LENS REMAINS IMPLANTED. ADDITIONAL INFORMATION HAS BEEN REQUESTED BUT NONE HAS BEEN FORTHCOMING. IF ADDITIONAL INFORMATION IS RECEIVED, A SUPPLEMENTAL MEDWATCH WILL BE SUBMI…
https://www.accessdata.fda.gov/scripts/cdrh/cfdocs/cfMAUDE/Detail.CFM?MDRFOI__ID=8764776&pc=MTA	2023826-2019-01147	2019-04-04 04:00:00	Injury	STAAR SURGICAL COMPANY	2019-07-05 04:00:00	MTA	IMPLANTABLE COLLAMER LENS (ICL)	Misfocusing	Blurred Vision	N/A	1	Event Description: THE REPORTER INDICATED THAT A 12.1 MM, VICM5_12.1, -5.0 DIOPTER, IMPLANTABLE COLLAMER LENS WAS IMPLANTED INTO THE PATIENTS LEFT EYE (OS) ON (B)(6) 2019. ON (B)(6) 2019 THE LENS WAS EXCHANGED FOR A DIFFERENT DIOPTER LENS. THIS EXCHANGE RESOLVED THE PROBLEM. Manufacturer Narrative: FILLED IN KNOWN LOT NUMBERS. CONCLUSION CODE 4310: DIMENSIONAL AND FUNCTIONAL INSPECTION FOUND THE …
https://www.accessdata.fda.gov/scripts/cdrh/cfdocs/cfMAUDE/Detail.CFM?MDRFOI__ID=11322922&pc=MTA	2023826-2021-00422	2019-05-06 04:00:00	Injury	STAAR SURGICAL COMPANY	2021-02-12 05:00:00	MTA	IMPLANTABLE COLLAMER LENS (ICL)	Misfocusing	Blurred Vision	NA	1	Event Description: THE REPORTER INDICATED THAT A 12.6MM, VIICMO12.6, -16.0 DIOPTER, IMPLANTABLE COLLAMER LENS WAS IMPLANTED INTO THE PATIENTS RIGHT EYE (OD) ON (B)(6) 2018. ON (B)(6) 2019 THE LENS EXCHANGED FOR A DIFFERENT DIOPTER LENS DUE TO REFRACTIVE SURPRISE. THIS EXCHANGE RESOLVED THE PROBLEM. CAUSE OF THE EVENT WAS REPORTER AS UNKNOWN. Manufacturer Narrative: H3 - DEVICE EVALUATION: THE LEN…
https://www.accessdata.fda.gov/scripts/cdrh/cfdocs/cfMAUDE/Detail.CFM?MDRFOI__ID=8846158&pc=MTA	2023826-2019-01210	2019-06-04 04:00:00	Injury	STAAR SURGICAL COMPANY	2019-07-31 04:00:00	MTA	IMPLANTABLE COLLAMER LENS (ICL)	Misfocusing	Blurred Vision	N/A	1	Event Description: THE REPORTER INDICATED THAT A 12.6MM, VICM5_12.6, -11.00 DIOPTER, IMPLANTABLE COLLAMER LENS WAS IMPLANTED INTO THE PATIENT'S LEFT EYE (OS) ON (B)(6) 2019. REFRACTIVE SURPRISE WAS OBSERVED, THE LENS WAS REMOVED ON (B)(6) 2019. REPORTEDLY, "PATIENT WANTS TO WAIT AND WEAR GLASSES AGAIN." Manufacturer Narrative: LENS RETURNED TO MANUFACTURER IN PREVIOUS MDR IS INCORECT. THE CORRECT…
https://www.accessdata.fda.gov/scripts/cdrh/cfdocs/cfMAUDE/Detail.CFM?MDRFOI__ID=9492339&pc=MTA	2023826-2019-02405	2019-11-05 05:00:00	Injury	STAAR SURGICAL COMPANY	2019-12-19 05:00:00	MTA	IMPLANTABLE COLLAMER LENS (ICL)	Misfocusing	Blurred Vision	NA	1	Event Description: THE REPORTER INDICATED THE SURGEON IMPLANTED A 12.1MM VICM5_12.1 IMPLANTABLE COLLAMER LENS, -03.50 DIOPTER, IN THE PATIENTS LEFT EYE (OS), ON (B)(6) 2019. THE PATIENT EXPERIENCED A REFRACTIVE SURPRISE AND THE LENS REMAINS IMPLANTED. THE SURGEON PLANS TO EXPLANT AND EXCHANGE THE LENS. Manufacturer Narrative: ADDITIONAL INFORMATION: B5- "LENS WAS EXCHANGED ON (B)(6) 2020 WITH A L…
https://www.accessdata.fda.gov/scripts/cdrh/cfdocs/cfMAUDE/Detail.CFM?MDRFOI__ID=9814218&pc=MTA	2023826-2020-00408	2020-02-19 05:00:00	Injury	STAAR SURGICAL COMPANY	2020-03-10 04:00:00	MTA	IMPLANTABLE COLLAMER LENS (ICL)	Misfocusing	Blurred Vision	P030016	1	Event Description: THE REPORTER INDICATED THE SURGEON IMPLANTED A 13.2MM MICL13.2 IMPLANTABLE COLLAMER LENS, -9.00 DIOPTER, IN THE PATIENTS RIGHT EYE (OD) ON (B)(6) 2020 AS A REPLACEMENT LENS, SEE MFR REPORT # 2023826-2020-00407 FOR INITIAL LENS. THE REPORTER INDICATED POST-OP, THE PATIENT HAD LOSS OF VISUAL ACUITY. TO DATE, THE BCVA HAS NOT INCREASED BUT VAULT IS BETTER. THE LENS REMAINED IMPLAN…
https://www.accessdata.fda.gov/scripts/cdrh/cfdocs/cfMAUDE/Detail.CFM?MDRFOI__ID=9988384&pc=MTA	2023826-2020-00955	2020-03-30	Malfunction	STAAR SURGICAL COMPANY	2020-04-22	MTA	IMPLANTABLE COLLAMER LENS (ICL)	Misfocusing	Blurred Vision	NA	1	Event Description: THE REPORTER INDICATED THE SURGEON IMPLANTED A 13.2MM VICM5_13.2 IMPLANTABLE COLLAMER LENS, -06.50 DIOPTER, IN THE PATIENTS LEFT EYE (OS), ON (B)(6) 2020. THE LENS WAS IMPLANTED AS AN EXCHANGE LENS AND IT WAS UNKNOWN IF THE PROBLEM WAS RESOLVED, IF THE PATIENT STILL EXPERIENCED A REFRACTIVE SURPRISE. SEE MFR REPORT # 2023826-2020-00954 FOR THE INITIAL LENS. THE CAUSE OF THE EVE…
https://www.accessdata.fda.gov/scripts/cdrh/cfdocs/cfMAUDE/Detail.CFM?MDRFOI__ID=10002861&pc=MTA	2023826-2020-00977	2020-04-01 04:00:00	Injury	STAAR SURGICAL COMPANY	2020-04-27 04:00:00	MTA	IMPLANTABLE COLLAMER LENS (ICL)	Misfocusing	Blurred Vision	NA	1	Event Description: THE REPORTER INDICATED THAT THE SURGEON IMPLANTED A 12.6MM VICM5_12.6 IMPLANTABLE COLLAMER LENS, DIOPTER -2.25 INTO THE PATIENT'S LEFT EYE (OS) ON (B)(6) 2019. THE SURGEON NOTES REFRACTIVE SURPRISE. REPORTEDLY THE LENS REMAINS IMPLANTED. THE CAUSE OF THE EVENT IS REPORTED AS UNKNOWN. Manufacturer Narrative: B5: ON (B)(6) 2021; THE LENS WAS REMOVED AND A SAME MODEL; SAME LENGTH …
https://www.accessdata.fda.gov/scripts/cdrh/cfdocs/cfMAUDE/Detail.CFM?MDRFOI__ID=13459229&pc=MTA	2023826-2022-00385	2020-04-16 04:00:00	Injury	STAAR SURGICAL COMPANY	2022-02-04 05:00:00	MTA	IMPLANTABLE COLLAMER LENS	Misfocusing	Blurred Vision	NA	1	Event Description: THE REPORTER INDICATED THAT THE SURGEON IMPLANTED A 13.2MM VICMO13.2 IMPLANTABLE COLLAMER LENS -6.5 DIOPTER INTO THE PATIENT'S RIGHT EYE (OD) ON (B)(6) 2020. ON (B)(6) 2020 THE LENS WAS EXCHANGED WITH A SAME SIZE DIFFERENT DIOPTER LENS DUE TO REFRACTIVE SURPRISE. THE PROBLEM WAS RESOLVED. THE CAUSE OF THE EVENT IS REPORTED AS UNKNOWN. Manufacturer Narrative: WEIGHT, RACE, ETHNI…
https://www.accessdata.fda.gov/scripts/cdrh/cfdocs/cfMAUDE/Detail.CFM?MDRFOI__ID=11453113&pc=MTA	2023826-2021-00603	2020-05-28 04:00:00	Injury	STAAR SURGICAL COMPANY	2021-03-10 05:00:00	MTA	IMPLANTABLE COLLAMER LENS (ICL)	Misfocusing	Blurred Vision	N/A	1	Event Description: THE REPORTER INDICATED THAT A 12.1MM, VICMO 12.1, -05.50 DIOPTER, IMPLANTABLE COLLAMER LENS WAS IMPLANTED INTO THE PATIENT'S LEFT EYE (OS) ON (B)(6) 2019. ON (B)(6) 2020 THE LENS WAS EXCHANGED WITH A SAME LENGTH TORIC LENS ( -6.00/1.0/082 (SPHERE/CYLINDER/AXIS)) LENS DUE TO REFRACTIVE SURPRISE. THE PROBLEM WAS RESOLVED. CAUSE OF THE EVENT IS REPORTED AS UNKNOWN. Manufacturer Na…
https://www.accessdata.fda.gov/scripts/cdrh/cfdocs/cfMAUDE/Detail.CFM?MDRFOI__ID=10577512&pc=MTA	2023826-2020-02194	2020-05-30 04:00:00	Injury	STAAR SURGICAL COMPANY	2020-09-23 04:00:00	MTA	IMPLANTABLE COLLAMER LENS	Misfocusing	Blurred Vision	NA	1	Event Description: THE REPORTER INDICATED THAT THE SURGEON IMPLANTED A 12.6MM VICM5_12.6 IMPLANTABLE COLLAMER LENS, -4.0 DIOPTER INTO THE PATIENT'S RIGHT EYE (OD) ON (B)(6) 2020. REPORTEDLY, THE LENS WAS EXPLANTED ON (B)(6) 2020. ON (B)(6) 2020 THE LENS WAS REPLACED WITH A SAME SIZE, DIFFERENT DIOPTER LENS DUE TO REFRACTIVE SURPRISE. THE PROBLEM WAS RESOLVED. THE CAUSE OF THE EVENT IS REPORTED AS…
https://www.accessdata.fda.gov/scripts/cdrh/cfdocs/cfMAUDE/Detail.CFM?MDRFOI__ID=11098617&pc=MTA	2023826-2020-03256	2020-06-24 04:00:00	Injury	STAAR SURGICAL COMPANY	2020-12-30 05:00:00	MTA	IMPLANTABLE COLLAMER LENS	Misfocusing	Blurred Vision	N/A	1	Event Description: THE REPORTER INDICATED THAT THE SURGEON IMPLANTED A 12.6MM VICM5_12.6 IMPLANTABLE COLLAMER LENS, -10.0 DIOPTER INTO THE PATIENT'S LEFT EYE (OS) ON (B)(6) 2020. ON (B)(6) 2020 THE LENS WAS EXCHANGED FOR A SAME SIZE, DIFFERENT MODEL LENS DUE TO REFRACTIVE SURPRISE. THE PROBLEM WAS RESOLVED. THE CAUSE OF THE EVENT IS REPORTED AS A PATIENT-RELATED FACTOR. Manufacturer Narrative: AD…
https://www.accessdata.fda.gov/scripts/cdrh/cfdocs/cfMAUDE/Detail.CFM?MDRFOI__ID=11098631&pc=MTA	2023826-2020-03255	2020-06-24 04:00:00	Injury	STAAR SURGICAL COMPANY	2020-12-30 05:00:00	MTA	IMPLANTABLE COLLAMER LENS	Misfocusing	Blurred Vision	N/A	1	Event Description: THE REPORTER INDICATED THAT THE SURGEON IMPLANTED A 12.6MM VICM5_12.6 IMPLANTABLE COLLAMER LENS, -11.0 DIOPTER INTO THE PATIENT'S RIGHT EYE (OD) ON (B)(6) 2020. ON (B)(6) 2020 THE LENS WAS EXCHANGED FOR A SAME SIZE, DIFFERENT MODEL LENS DUE TO REFRACTIVE SURPRISE. THE PROBLEM WAS RESOLVED. THE CAUSE OF THE EVENT IS REPORTED AS A PATIENT-RELATED FACTOR. Manufacturer Narrative: A…
https://www.accessdata.fda.gov/scripts/cdrh/cfdocs/cfMAUDE/Detail.CFM?MDRFOI__ID=12171163&pc=MTA	2023826-2021-02584	2020-07-01	Injury	STAAR SURGICAL COMPANY	2021-07-15	MTA	IMPLANTABLE COLLAMER LENS (ICL)	Misfocusing	Blurred Vision	NA	1	Event Description: THE REPORTER INDICATED THAT A 12.6MM, VICMO12.6, -8.5 DIOPTER, IMPLANTABLE COLLAMER LENS WAS IMPLANTED INTO THE PATIENTS RIGHT EYE (OD) ON (B)(6) 2020. ON (B)(6) 2020 THE LENS WAS EXCHANGED FOR A DIFFERENT MODEL AND DIOPTER LENS DUE TO REFRACTIVE CHANGE OVERTIME. THIS EXCHANGE RESOLVED THE PROBLEM. CAUSE OF EVENT WAS UNKNOWN. Manufacturer Narrative: PT INFO: UNK. PMA/510K: THIS…
https://www.accessdata.fda.gov/scripts/cdrh/cfdocs/cfMAUDE/Detail.CFM?MDRFOI__ID=10403865&pc=MTA	2023826-2020-01724	2020-07-15 04:00:00	Injury	STAAR SURGICAL COMPANY	2020-08-13 04:00:00	MTA	IMPLANTABLE COLLAMER LENS (ICL)	Misfocusing	Blurred Vision	N/A	1	Event Description: THE REPORTER INDICATED THAT THE SURGEON IMPLANTED AN IMPLANTABLE COLLAMER LENS (ICL) INTO THE PATIENT'S EYE ON (B)(6) 2020. THE SURGEON REPORTS REFRACTIVE SURPRISE. ATTEMPTS TO OBTAIN ADDITIONAL INFORMATION HAVE NOT BEEN SUCCESSFUL. Manufacturer Narrative: B5-ADDITIONAL INFORMATION: THE SURGEON ALSO REPORTS BLURRED VISION. REPORTEDLY, THE PATIENT'S ACD WAS CALCULATED AND ENTERE…
https://www.accessdata.fda.gov/scripts/cdrh/cfdocs/cfMAUDE/Detail.CFM?MDRFOI__ID=12148282&pc=MTA	2023826-2021-02429	2020-07-20 04:00:00	Injury	STAAR SURGICAL COMPANY	2021-07-11 04:00:00	MTA	IMPLANTABLE COLLAMER LENS	Misfocusing	Blurred Vision	NA	1	Event Description: THE REPORTER INDICATED THAT THE SURGEON IMPLANTED A 13.7MM VICMO13.7 IMPLANTABLE COLLAMER LENS, -6.5 DIOPTER, INTO THE PATIENT'S RIGHT EYE (OD) ON (B)(6) 2020. REPORTEDLY, THE LENS WAS EXPLANTED AND REPLACED ON (B)(6) 2020 WITH A SAME SIZE DIFFERENT DIOPTER LENS DUE TO REFRACTIVE SURPRISE. THE PROBLEM WAS RESOLVED. THE CAUSE OF THE EVENT IS REPORTED AS DEVICE. Manufacturer Narr…
https://www.accessdata.fda.gov/scripts/cdrh/cfdocs/cfMAUDE/Detail.CFM?MDRFOI__ID=11620598&pc=MTA	2023826-2021-00877	2020-07-24 04:00:00	Injury	STAAR SURGICAL COMPANY	2021-04-06 04:00:00	MTA	IMPLANTABLE COLLAMER LENS	Misfocusing	Blurred Vision	NA	1	Event Description: THE REPORTER INDICATED THAT THE SURGEON IMPLANTED A 13.2MM VICMO13.2 IMPLANTABLE COLLAMER LENS, -9.0 DIOPTER, INTO THE PATIENT'S LEFT EYE (OS) ON (B)(6) 2020. REPORTEDLY, THE LENS WAS EXCHANGED ON (B)(6) 2020 WITH A SHORTER LENGTH DIFFERENT MODEL LENS DUE TO REFRACTIVE SURPRISE. THE PROBLEM WAS RESOLVED. THE CAUSE OF THE EVENT IS REPORTED AS UNKNOWN. Manufacturer Narrative: H3 …
https://www.accessdata.fda.gov/scripts/cdrh/cfdocs/cfMAUDE/Detail.CFM?MDRFOI__ID=11620605&pc=MTA	2023826-2021-00876	2020-07-24 04:00:00	Injury	STAAR SURGICAL COMPANY	2021-04-06 04:00:00	MTA	IMPLANTABLE COLLAMER LENS	Misfocusing	Blurred Vision	NA	1	Event Description: THE REPORTER INDICATED THAT THE SURGEON IMPLANTED A 13.2MM VICMO13.2 IMPLANTABLE COLLAMER LENS, -8.0 DIOPTER, INTO THE PATIENT'S RIGHT EYE (OD) ON (B)(6) 2020. REPORTEDLY, THE LENS WAS EXCHANGED ON (B)(6) 2020 WITH A SAME SIZE DIFFERENT MODEL LENS DUE TO REFRACTIVE SURPRISE. THE PROBLEM WAS RESOLVED. THE CAUSE OF THE EVENT IS REPORTED AS UNKNOWN. Manufacturer Narrative: H3 - DE…
https://www.accessdata.fda.gov/scripts/cdrh/cfdocs/cfMAUDE/Detail.CFM?MDRFOI__ID=12171147&pc=MTA	2023826-2021-02585	2020-08-11 04:00:00	Injury	STAAR SURGICAL COMPANY	2021-07-15 04:00:00	MTA	IMPLANTABLE COLLAMER LENS (ICL)	Misfocusing	Blurred Vision	NA	1	Event Description: THE REPORTER INDICATED THAT A 12.6MM, VICMO12.6, -6.0 DIOPTER, IMPLANTABLE COLLAMER LENS WAS IMPLANTED INTO THE PATIENTS RIGHT EYE (OD) ON (B)(6) 2020. ON (B)(6) 2020 THE LENS WAS EXCHANGED FOR A DIFFERENT MODEL AND DIOPTER LENS DUE TO REFRACTIVE SURPRISE. THIS EXCHANGE RESOLVED THE PROBLEM. PATIENT RELATED FACTOR WAS REPORTED TO BE THE CAUSE OF THIS EVENT. Manufacturer Narrati…
https://www.accessdata.fda.gov/scripts/cdrh/cfdocs/cfMAUDE/Detail.CFM?MDRFOI__ID=12322376&pc=MTA	2023826-2021-03118	2020-08-21	Injury	STAAR SURGICAL COMPANY	2021-08-15	MTA	IMPLANTABLE COLLAMER LENS	Misfocusing	Blurred Vision	P030016	1	Event Description: THE REPORTER STATES A 13.2MM MICL13.2 IMPLANTABLE COLLAMER LENS -11.5 WAS IMPLANTED INTO THE PATIENT'S RIGHT (OD) EYE ON (B)(6) 2015. ON (B)(6) 2021 THE LENS WAS EXCHANGED WITH A SAME SIZE DIFFERENT DIOPTER LENS DUE TO REFRACTIVE CHANGE OVER TIME. THE PROBLEM IS RESOLVED. THE SURGEON REPORTS, "TRACE CELLS, GOOD VAULT AT 1-WEEK POSTOP" AFTER EXCHANGE. THE CAUSE OF THE EVENT IS R…
https://www.accessdata.fda.gov/scripts/cdrh/cfdocs/cfMAUDE/Detail.CFM?MDRFOI__ID=12322379&pc=MTA	2023826-2021-03117	2020-08-21 04:00:00	Injury	STAAR SURGICAL COMPANY	2021-08-15 04:00:00	MTA	IMPLANTABLE COLLAMER LENS	Misfocusing	Blurred Vision	P030016	1	Event Description: THE REPORTER STATES A 13.2MM MICL13.2 IMPLANTABLE COLLAMER LENS -11.5 WAS IMPLANTED INTO THE PATIENT'S RIGHT (OD) EYE ON (B)(6) 2015. ON (B)(6) 2021 THE LENS WAS EXCHANGED WITH A SAME SIZE DIFFERENT DIOPTER LENS DUE TO REFRACTIVE CHANGE OVER TIME. THE PROBLEM IS RESOLVED. THE SURGEON REPORTS, "TRACE CELLS, GOOD VAULT AT 1-WEEK POSTOP" AFTER EXCHANGE. THE CAUSE OF THE EVENT IS R…
https://www.accessdata.fda.gov/scripts/cdrh/cfdocs/cfMAUDE/Detail.CFM?MDRFOI__ID=10755799&pc=MTA	2023826-2020-02463	2020-09-07 04:00:00	Injury	STAAR SURGICAL COMPANY	2020-10-29 04:00:00	MTA	IMPLANTABLE COLLAMER LENS (ICL)	Misfocusing	Blurred Vision	N/A	1	Event Description: THE REPORTER INDICATED THAT A 13.2MM, VICM5_13.2, -06.00 DIOPTER, IMPLANTABLE COLLAMER LENS WAS IMPLANTED INTO THE PATIENT'S LEFT EYE (OS) ON (B)(6) 2020. ON (B)(6) 2020 THE LENS WAS REMOVED AND EXCHANGED WITH A LONGER LENGTH LENS DUE TO REFRACTIVE SURPRISE. THE PROBLEM WAS RESOLVED. CAUSE OF THE EVENT IS REPORTED AS UNKNOWN. Manufacturer Narrative: ADDITIONAL INFORMATION: H3- …
https://www.accessdata.fda.gov/scripts/cdrh/cfdocs/cfMAUDE/Detail.CFM?MDRFOI__ID=10938834&pc=MTA	2023826-2020-02844	2020-09-28 04:00:00	Injury	STAAR SUGICAL COMPANY	2020-12-03 05:00:00	MTA	IMPLANTABLE COLLAMER LENS (ICL)	Misfocusing	Blurred Vision	NA	1	Event Description: THE REPORTER INDICATED THAT A 12.6MM, VICM5_12.6, -11.50 DIOPTER, IMPLANTABLE COLLAMER LENS WAS IMPLANTED INTO THE PATIENTS LEFT EYE ON (B)(6) 2020. ON (B)(6) 2020 THE LENS WAS EXCHANGED FOR A DIFFERENT DIOPTER LENS DUE TO REFRACTIVE SURPRISE. THIS EXCHANGE RESOLVED THE PROBLEM. Manufacturer Narrative: H3 - DEVICE EVALUATION: LENS WAS RETURNED IN A VIAL IN LIQUID. VISUAL INSPEC…
https://www.accessdata.fda.gov/scripts/cdrh/cfdocs/cfMAUDE/Detail.CFM?MDRFOI__ID=10812799&pc=MTA	2023826-2020-02609	2020-10-01 04:00:00	Malfunction	STAAR SURGICAL COMPANY	2020-11-09 05:00:00	MTA	IMPLANTABLE COLLAMER LENS	Misfocusing	Blurred Vision	N/A	1	Event Description: THE REPORTER STATED THAT THE SURGEON IMPLANTED AN IMPLANTABLE COLLAMER LENS INTO THE PATIENT'S LEFT EYE (OS). THE SURGEON REPORTS REFRACTIVE SURPRISE. ATTEMPTS TO OBTAIN ADDITIONAL INFORMATION HAVE NOT BEEN SUCCESSFUL. Manufacturer Narrative: ADDITIONAL INFORMATION: B5 - THE REPORTER STATED THE SURGEON IMPLANTED A 13.2MM VICM5_13.2 IMPLANTABLE COLLAMER LENS INTO THE PATIENT'S L…
https://www.accessdata.fda.gov/scripts/cdrh/cfdocs/cfMAUDE/Detail.CFM?MDRFOI__ID=11788143&pc=MTA	2023826-2021-01393	2020-10-12 04:00:00	Malfunction	STAAR SURGICAL COMPANY	2021-05-06 04:00:00	MTA	IMPLANTABLE COLLAMER LENS (ICL)	Misfocusing	Blurred Vision	NA	1	Event Description: THE REPORTER INDICATED THAT A 12.6MM, VICMO12.6, -7.50 DIOPTER, IMPLANTABLE COLLAMER LENS WAS IMPLANTED INTO THE PATIENTS RIGHT EYE (OD) ON (B)(6) 2020. ON (B)(6) 2020 THE LENS WAS EXCHANGED FOR A DIFFERENT DIOPTER LENS DUE TO REFRACTIVE SURPRISE. THIS EXCHANGE RESOLVED THE PROBLEM. CAUSE OF THIS EVENT IS UNKNOWN. Manufacturer Narrative: H3: DEVICE EVALUATION: THE LENS WAS RETU…
https://www.accessdata.fda.gov/scripts/cdrh/cfdocs/cfMAUDE/Detail.CFM?MDRFOI__ID=11788188&pc=MTA	2023826-2021-01394	2020-10-12 04:00:00	Injury	STAAR SURGICAL COMPANY	2021-05-06 04:00:00	MTA	IMPLANTABLE COLLAMER LENS (ICL)	Misfocusing	Blurred Vision	NA	1	Event Description: THE REPORTER INDICATED THAT A 12.6MM, VICMO12.6, -7.50 DIOPTER, IMPLANTABLE COLLAMER LENS WAS IMPLANTED INTO THE PATIENTS LEFT EYE (OS) ON (B)(6) 2020. ON (B)(6) 2020 THE LENS WAS EXCHANGED FOR A DIFFERENT DIOPTER LENS DUE TO REFRACTIVE SURPRISE. THIS EXCHANGE RESOLVED THE PROBLEM. CAUSE OF THIS EVENT IS UNKNOWN. Manufacturer Narrative: H3: DEVICE EVALUATION: THE LENS WAS RETUR…
https://www.accessdata.fda.gov/scripts/cdrh/cfdocs/cfMAUDE/Detail.CFM?MDRFOI__ID=11536792&pc=MTA	2023826-2021-00734	2020-10-17 04:00:00	Injury	STAAR SURGICAL COMPANY	2021-03-21 04:00:00	MTA	IMPLANTABLE COLLAMER LENS (ICL)	Misfocusing	Blurred Vision	NA	1	Event Description: THE REPORTER INDICATED THAT A 13.2MM, VICMO13.2, -7.0 DIOPTER, IMPLANTABLE COLLAMER LENS WAS IMPLANTED INTO THE PATIENTS RIGHT EYE (OD) ON (B)(6) 2020. ON (B)(6) 2020 THE LENS WAS EXCHANGED FOR A DIFFERENT MODEL AND DIOPTER LENS DUE TO REFRACTIVE SURPRISE. THIS EXCHANGE RESOLVED THE PROBLEM. CAUSE OF THE EVENT WAS REPORTER AS UNKNOWN. Manufacturer Narrative: B5 - THE REPORTER I…
https://www.accessdata.fda.gov/scripts/cdrh/cfdocs/cfMAUDE/Detail.CFM?MDRFOI__ID=10937930&pc=MTA	2023826-2020-02779	2020-10-20 04:00:00	Injury	STAAR SURGICAL COMPANY	2020-12-03 05:00:00	MTA	IMPLANTABLE COLLAMER LENS (ICL)	Misfocusing	Blurred Vision	N/A	1	Event Description: THE REPORTER INDICATED THAT A 13.7MM, VICMO 13.7, -7.50 DIOPTER, IMPLANTABLE COLLAMER LENS WAS IMPLANTED INTO THE PATIENT'S RIGHT EYE (OD) ON APR/2015. REFRACTIVE SURPRISE WITH GLARE/HALOES WAS OBSERVED. THE LENS REMAINS IMPLANTED. IF ADDITIONAL INFORMATION IS RECEIVED, A SUPPLEMENTAL MEDWATCH REPORT WILL BE SUBMITTED. Manufacturer Narrative: ADDITIONAL INFORMATION: B5: THE REP…
https://www.accessdata.fda.gov/scripts/cdrh/cfdocs/cfMAUDE/Detail.CFM?MDRFOI__ID=11563239&pc=MTA	2023826-2021-00762	2020-10-21 04:00:00	Injury	STAAR SURGICAL COMPANY	2021-03-24 04:00:00	MTA	IMPLANTABLE COLLAMER LENS (ICL)	Misfocusing	Blurred Vision	N/A	1	Event Description: THE REPORTER INDICATED THAT A 13.2MM, VICMO 13.2, -04.50 DIOPTER, IMPLANTABLE COLLAMER LENS WAS IMPLANTED INTO THE PATIENT'S RIGHT EYE (OD) ON (B)(6) 2020. THE LENS WAS REMOVED AND EXCHANGED FOR A SAME LENGTH LENS WITH A -5.5 DIOPTER TO RESOLVE THE PROBLEM. CAUSE OF THE EVENT IS REPORTED AS UNKNOWN. Manufacturer Narrative: ADDITIONAL INFORMATION: H3 - DEVICE EVALUATION: LENS WA…
https://www.accessdata.fda.gov/scripts/cdrh/cfdocs/cfMAUDE/Detail.CFM?MDRFOI__ID=13317799&pc=MTA	2023826-2022-00205	2020-11-01 04:00:00	Injury	STAAR SURGICAL COMPANY	2022-01-21 05:00:00	MTA	IMPLANTABLE COLLAMER LENS	Misfocusing	Blurred Vision	NA	1	Event Description: THE REPORTER INDICATED THAT THE SURGEON IMPLANTED A 13.2MM VICMO13.2 IMPLANTABLE COLLAMER LENS, -14.5 DIOPTER INTO THE PATIENT'S LEFT EYE (OS) ON (B)(6) 2021. REPORTEDLY THE LENS WAS EXCHANGED ON (B)(6) 2021 WITH A SAME SIZE DIFFERENT DIOPTER LENS DUE TO REFRACTIVE SURPRISE. THE PROBLEM WAS RESOLVED. THE CAUSE OF THE EVENT IS REPORTED AS UNKNOWN.Event Description: THE REPORTER …
https://www.accessdata.fda.gov/scripts/cdrh/cfdocs/cfMAUDE/Detail.CFM?MDRFOI__ID=11710516&pc=MTA	2023826-2021-01107	2020-11-08 05:00:00	Injury	STAAR SURGICAL COMPANY	2021-04-22 04:00:00	MTA	IMPLANTABLE COLLAMER LENS (ICL)	Misfocusing	Blurred Vision	NA	1	Event Description: THE REPORTER INDICATED THAT A 13.2MM, VICMO13.2, -11.0 DIOPTER, IMPLANTABLE COLLAMER LENS WAS IMPLANTED INTO THE PATIENTS RIGHT EYE (OD) ON (B)(6) 2020. ON (B)(6) 2020 THE LENS WAS EXCHANGED FOR A DIFFERENT DIOPTER LENS DUE TO REFRACTIVE SURPRISE. THIS EXCHANGE RESOLVED THE PROBLEM. CAUSE OF THE EVENT WAS REPORTER AS UNKNOWN. Manufacturer Narrative: H3 - DEVICE EVALUATION: LENS…
https://www.accessdata.fda.gov/scripts/cdrh/cfdocs/cfMAUDE/Detail.CFM?MDRFOI__ID=11416066&pc=MTA	2023826-2021-00564	2020-11-13 05:00:00	Injury	STAAR SURGICAL COMPANY	2021-03-04 05:00:00	MTA	IMPLANTABLE COLLAMER LENS (ICL)	Misfocusing	Blurred Vision		1	Event Description: THE REPORTER INDICATED THAT THE SURGEON IMPLANTED A IMPLANTABLE COLLAMER LENS INTO THE PATIENT'S RIGHT EYE (OD) ON (B)(6) 2020. AN "UNEXPECTED REFRACTIVE OUTCOME" AND A 25 DEGREES ROTATION WAS OBSERVED. LENS REMAINS IMPLANTED. ADDITIONAL INFORMATION HAS BEEN REQUESTED BUT NONE HAS BEEN FORTHCOMING. IF ADDITIONAL INFORMATION IS RECEIVED A SUPPLEMENTAL MEDWATCH REPORT WILL BE SUB…
https://www.accessdata.fda.gov/scripts/cdrh/cfdocs/cfMAUDE/Detail.CFM?MDRFOI__ID=11416418&pc=MTA	2023826-2021-00513	2020-11-29 05:00:00	Injury	STAAR SURGICAL COMPANY	2021-03-04 05:00:00	MTA	IMPLANTABLE COLLAMER LENS (ICL)	Misfocusing	Blurred Vision	N/A	1	Event Description: THE REPORTER INDICATED THAT A 13.2MM, VICM5 12.6, -09.50 DIOPTER, IMPLANTABLE COLLAMER LENS WAS IMPLANTED INTO THE PATIENT'S RIGHT EYE (OD) ON (B)(6) 2020. ON (B)(6) 2021 THE LENS WAS EXCHANGED WITH A SAME SIZE, HIGHER POWER LENS DUE TO REFRACTIVE SURPRISE. THE PROBLEM WAS RESOLVED. CAUSE OF THE EVENT IS REPORTED AS UNKNOWN. PER THE REPORTER ON (B)(6) 2021, "THERE IS NO PROBLEM…
https://www.accessdata.fda.gov/scripts/cdrh/cfdocs/cfMAUDE/Detail.CFM?MDRFOI__ID=12544735&pc=MTA	2023826-2021-03791	2020-12-04 05:00:00	Injury	STAAR SURGICAL COMPANY	2021-09-28 04:00:00	MTA	IMPLANTABLE COLLAMER LENS (ICL)	Misfocusing	Blurred Vision	NA	1	Event Description: THE REPORTER INDICATED THAT A 12.6MM, VICMO12.6, -2.00 DIOPTER, IMPLANTABLE COLLAMER LENS WAS IMPLANTED INTO THE PATIENTS LEFT EYE (OS) ON (B)(6) 2020. ON (B)(6) 2021 THE LENS WAS EXCHANGED WITH A DIFFERENT DIOPTER LENS DUE TO REFRACTIVE SURPRISE. THIS EXCHANGE RESOLVED THE PROBLEM. CAUSE OF EVENT WAS UNKNOWN. Manufacturer Narrative: H3 - DEVICE EVALUATION: THE LENS WAS RETURNE…
https://www.accessdata.fda.gov/scripts/cdrh/cfdocs/cfMAUDE/Detail.CFM?MDRFOI__ID=11135923&pc=MTA	2023826-2021-00059	2020-12-11 05:00:00	Injury	STAAR SURGICAL COMPANY	2021-01-07 05:00:00	MTA	IMPLANTABLE COLLAMER LENS (ICL)	Misfocusing	Blurred Vision	N/A	1	Event Description: THE REPORTER INDICATED THAT A 13.2MM, VICM5_13.2, -8.50, IMPLANTABLE COLLAMER LENS WAS IMPLANTED INTO THE PATIENT'S LEFT EYE (OS) ON (B)(6) 2020. ON (B)(6) 2020 THE LENS WAS EXCHANGED WITH A SAME SIZE DIFFERENT MODEL LENS AND THE PROBLEM WAS RESOLVED. Manufacturer Narrative: H6-INVESTIGATION TYPE 4110: LENS WORK ORDER SEARCH-NO SIMILAR COMPLAINT TYPE EVENTS REPORTED FOR UNITS W…
https://www.accessdata.fda.gov/scripts/cdrh/cfdocs/cfMAUDE/Detail.CFM?MDRFOI__ID=11855179&pc=MTA	2023826-2021-01509	2020-12-12	Injury	STAAR SURGICAL COMPANY	2021-05-20	MTA	IMPLANTABLE COLLAMER LENS (ICL)	Misfocusing	Blurred Vision	N/A	1	Event Description: THE REPORTER INDICATED THAT A 12.1MM, VICMO 12.1, -04.50 DIOPTER, IMPLANTABLE COLLAMER LENS WAS IMPLANTED INTO THE PATIENT'S LEFT EYE (OS) ON (B)(6) 2020. ON (B)(6) 2021 THE LENS WAS EXCHANGED WITH A SAME SIZE , HIGHER POWER (SPHERE/CYLINDER/AXIS) LENS DUE TO REFRACTIVE SURPRISE. THE PROBLEM WAS RESOLVED. CAUSE OF THE EVENT IS REPORTED AS UNKNOWN. Manufacturer Narrative: DATE R…
https://www.accessdata.fda.gov/scripts/cdrh/cfdocs/cfMAUDE/Detail.CFM?MDRFOI__ID=11366536&pc=MTA	2023826-2021-00479	2020-12-13 05:00:00	Injury	STAAR SURGICAL COMPANY	2021-02-23 05:00:00	MTA	IMPLANTABLE COLLAMER LENS	Misfocusing	Blurred Vision	NA	1	Event Description: THE REPORTER INDICATED THAT THE SURGEON IMPLANTED A 12.1MM VICMO12.1 IMPLANTABLE COLLAMER LENS, -16.5 DIOPTER, INTO THE PATIENT'S RIGHT EYE (OD) ON (B)(6) 2020. REPORTEDLY, THE LENS WAS EXCHANGED ON (B)(6) 2020 WITH A SAME SIZE, DIFFERENT DIOPTER LENS DUE TO REFRACTIVE SURPRISE. THE PROBLEM WAS RESOLVED. THE CAUSE OF THE EVENT IS REPORTED AS UNKNOWN. Manufacturer Narrative: H3 …
https://www.accessdata.fda.gov/scripts/cdrh/cfdocs/cfMAUDE/Detail.CFM?MDRFOI__ID=13256327&pc=MTA	2023826-2022-00151	2020-12-15 05:00:00	Injury	STAAR SURGICAL COMPANY	2022-01-13 05:00:00	MTA	IMPLANTABLE COLLAMER LENS	Misfocusing	Blurred Vision	NA	1	Event Description: THE REPORTER INDICATED THAT THE SURGEON IMPLANTED A COLLAMER LENS, -13.5 DIOPTER INTO THE PATIENT'S LEFT EYE (OS) ON (B)(6) 2020. REPORTEDLY THE LENS WAS EXCHANGED ON (B)(6) 2020 WITH A SAME SIZE DIFFERENT DIOPTER LENS DUE TO REFRACTIVE SURPRISE. THE PROBLEM WAS RESOLVED. THE CAUSE OF THE EVENT IS REPORTED AS UNKNOWN. Manufacturer Narrative: PMA/510(K): THIS PRODUCT IS MANUFACT…
https://www.accessdata.fda.gov/scripts/cdrh/cfdocs/cfMAUDE/Detail.CFM?MDRFOI__ID=11206969&pc=MTA	2023826-2021-00112	2020-12-18 05:00:00	Injury	STAAR SURGICAL COMPANY	2021-01-21 05:00:00	MTA	IMPLANTABLE COLLAMER LENS (ICL)	Misfocusing	Blurred Vision	N/A	1	Event Description: THE REPORTER INDICATED THAT THE SURGEON IMPLANTED A IMPLANTABLE COLLAMER LENS, INTO THE PATIENT'S LEFT EYE (OS). REFRACTIVE SURPRISE, LENS ROTATION NOT ASSOCIATED TO LOW VAULT WAS OBSERVED. LENS REMAINS IMPLANTED. ADDITIONAL INFORMATION HAS BEEN REQUESTED BUT NONE HAS BEEN FORTHCOMING. IF ADDITIONAL INFORMATION IS RECEIVED A SUPPLEMENTAL MEDWATCH REPORT WILL BE SUBMITTED. Manuf…
https://www.accessdata.fda.gov/scripts/cdrh/cfdocs/cfMAUDE/Detail.CFM?MDRFOI__ID=12178442&pc=MTA	2023826-2021-02711	2020-12-25 05:00:00	Injury	STAAR SURGICAL COMPANY	2021-07-15 04:00:00	MTA	IMPLANTABLE COLLAMER LENS	Misfocusing	Blurred Vision	NA	1	Event Description: THE REPORTER INDICATED THAT THE SURGEON IMPLANTED A 12.1MM VICM5_12.1 IMPLANTABLE COLLAMER LENS, -12.5 DIOPTER INTO THE PATIENT'S LEFT EYE (OS) ON (B)(6) 2020. REPORTEDLY, THE LENS WAS EXCHANGED ON (B)(6) 2021 WITH A SAME SIZE, DIFFERENT DIOPTER LENS DUE TO REFRACTIVE SURPRISE. THE PROBLEM WAS RESOLVED. THE CAUSE OF THE EVENT IS REPORTED AS UNKNOWN. Manufacturer Narrative: DEVI…
https://www.accessdata.fda.gov/scripts/cdrh/cfdocs/cfMAUDE/Detail.CFM?MDRFOI__ID=12207945&pc=MTA	2023826-2021-02747	2021-01-01 05:00:00	Injury	STAAR SURGICAL COMPANY	2021-07-21 04:00:00	MTA	IMPLANTABLE COLLAMER LENS (ICL)	Misfocusing	Blurred Vision	NA	1	Event Description: THE REPORTER INDICATED THAT A 12.6MM, VICMO12.6, -4.00 DIOPTER, IMPLANTABLE COLLAMER LENS WAS IMPLANTED INTO THE PATIENTS LEFT EYE (OS) ON (B)(6) 2020. ON (B)(6) 2021 THE LENS WAS EXCHANGED FOR A DIFFERENT MODEL AND DIOPTER LENS. THIS EXCHANGE RESOLVED THE PROBLEM. CAUSE OF EVENT WAS UNKNOWN. Manufacturer Narrative: ADDITIONAL INFORMATION: H3-DEVICE EVALUATION: LENS RETURNED IN…
https://www.accessdata.fda.gov/scripts/cdrh/cfdocs/cfMAUDE/Detail.CFM?MDRFOI__ID=11942684&pc=MTA	2023826-2021-01770	2021-01-08 05:00:00	Injury	STAAR SURGICAL COMPANY	2021-06-04 04:00:00	MTA	IMPLANTABLE COLLAMER LENS	Misfocusing	Blurred Vision	NA	1	Event Description: THE REPORTER INDICATED THAT THE SURGEON IMPLANTED A 12.6MM VICMO12.6 IMPLANTABLE COLLAMER LENS, -10.0 DIOPTER, INTO THE PATIENT'S LEFT EYE (OS) ON (B)(6) 2020. ON (B)(6) 2021 THE LENS WAS EXCHANGED WITH A SAME SIZE DIFFERENT DIOPTER LENS DUE TO REFRACTIVE SURPRISE. THE PROBLEM WAS RESOLVED. THE CAUSE OF THE EVENT IS REPORTED AS UNKNOWN. Manufacturer Narrative: H3: DEVICE EVALUA…
https://www.accessdata.fda.gov/scripts/cdrh/cfdocs/cfMAUDE/Detail.CFM?MDRFOI__ID=11308762&pc=MTA	2023826-2021-00308	2021-01-14 05:00:00	Injury	STAAR SURGICAL COMPANY	2021-02-10 05:00:00	MTA	IMPLANTABLE COLLAMER LENS (ICL)	Misfocusing	Blurred Vision	N/A	1	Event Description: THE REPORTER INDICATED THAT A 12.6MM, VICM5 12.6, -06.50 DIOPTER, IMPLANTABLE COLLAMER LENS WAS IMPLANTED INTO THE PATIENT'S LEFT EYE (OS) ON (B)(6) 2020. REFRACTIVE SURPRISE WAS OBSERVED, THE LENS REMAINS IMPLANTED. CAUSE OF THE EVENT IS REPORTED AS UNKNOWN. ADDITIONAL INFORMATION HAS BEEN REQUESTED BUT NONE HAS BEEN FORTHCOMING. IF ADDITIONAL INFORMATION IS RECEIVED A SUPPLEM…
https://www.accessdata.fda.gov/scripts/cdrh/cfdocs/cfMAUDE/Detail.CFM?MDRFOI__ID=11343195&pc=MTA	2023826-2021-00398	2021-01-20 05:00:00	Injury	STAAR SURGICAL COMPANY	2021-02-18 05:00:00	MTA	IMPLANTABLE COLLAMER LENS (ICL)	Misfocusing	Blurred Vision	N/A	1	Event Description: THE REPORTER INDICATED THAT A 12.6MM, VICM5_12.6, -10.50 DIOPTER, IMPLANTABLE COLLAMER LENS WAS IMPLANTED INTO THE PATIENT'S RIGHT EYE (OD) ON (B)(6) 2020. REFRACTIVE CHANGE OVERTIME WAS OBSERVED, THE LENS REMAINS IMPLANTED. ADDITIONAL INFORMATION HAS BEEN REQUESTED BUT NONE HAS BEEN FORTHCOMING. IF ADDITIONAL INFORMATION IS RECEIVED A SUPPLEMENTAL MEDWATCH REPORT WILL BE SUBMI…
https://www.accessdata.fda.gov/scripts/cdrh/cfdocs/cfMAUDE/Detail.CFM?MDRFOI__ID=11942674&pc=MTA	2023826-2021-01779	2021-02-01	Injury	STAAR SURGICAL COMPANY	2021-06-04	MTA	IMPLANTABLE COLLAMER LENS	Misfocusing	Blurred Vision	NA	1	Event Description: THE REPORTER INDICATED THAT THE SURGEON IMPLANTED A 12.6MM VICMO12.6 IMPLANTABLE COLLAMER LENS, -6.0 DIOPTER, INTO THE PATIENT'S RIGHT EYE (OD) ON (B)(6) 2020. REPORTEDLY, THE LENS WAS EXCHANGED ON (B)(6) 2021 WITH A LONGER LENS DUE TO LOW VAULT AND REFRACTIVE SURPRISE. THE PROBLEM WAS RESOLVED. THE CAUSE OF THE EVENT IS REPORTED AS UNKNOWN. Manufacturer Narrative: THIS PRODUCT…
https://www.accessdata.fda.gov/scripts/cdrh/cfdocs/cfMAUDE/Detail.CFM?MDRFOI__ID=11400353&pc=MTA	2023826-2021-00514	2021-02-02 05:00:00	Injury	STAAR SURGICAL COMPANY	2021-03-02 05:00:00	MTA	IMPLANTABLE COLLAMER LENS	Misfocusing	Blurred Vision	NA	1	Event Description: THE REPORTER INDICATED THAT THE SURGEON IMPLANTED A 13.2MM VICM5_13.2 IMPLANTABLE COLLAMER LENS, -2.5 DIOPTER INTO THE PATIENT'S RIGHT EYE (OD) ON (B)(6) 2020. ON (B)(6) 2021 THE LENS WAS EXPLANTED DUE TO REFRACTIVE SURPRISE. ON THE SAME DATE IN A SEPARATE SURGERY, A SAME SIZE DIFFERENT DIOPTER LENS WAS IMPLANTED AND THE PROBLEM WAS RESOLVED. THE CAUSE OF THE EVENT IS REPORTED …
https://www.accessdata.fda.gov/scripts/cdrh/cfdocs/cfMAUDE/Detail.CFM?MDRFOI__ID=11751223&pc=MTA	2023826-2021-01284	2021-02-08	Injury	STAAR SURGICAL COMPANY	2021-04-30	MTA	IMPLANTABLE COLLAMER LENS (ICL)	Misfocusing	Blurred Vision	NA	1	Event Description: THE REPORTER INDICATED THAT A 12.6MM, VICM5_12.6, -7.00 DIOPTER, IMPLANTABLE COLLAMER LENS WAS IMPLANTED INTO THE PATIENTS RIGHT EYE (OD) ON (B)(6) 2020. ON (B)(6) 2021 THE LENS WAS EXCHANGED FOR A DIFFERENT MODEL AND DIOPTER LENS. THIS EXCHANGE RESOLVED THE PROBLEM. Manufacturer Narrative: WEIGHT: UNK, ETHNICITY: UNK, RACE: UNK. THIS PRODUCT IS NOT MARKETED IN THE US. WORK ORD…
https://www.accessdata.fda.gov/scripts/cdrh/cfdocs/cfMAUDE/Detail.CFM?MDRFOI__ID=12207967&pc=MTA	2023826-2021-02748	2021-03-01 05:00:00	Injury	STAAR SURGICAL COMPANY	2021-07-21 04:00:00	MTA	IMPLANTABLE COLLAMER LENS (ICL)	Misfocusing	Blurred Vision	NA	1	Event Description: THE REPORTER INDICATED THAT A 12.1MM, VICMO12.1, -10.00 DIOPTER, IMPLANTABLE COLLAMER LENS WAS IMPLANTED INTO THE PATIENTS RIGHT EYE (OD) ON (B)(6) 2020. ON (B)(6) 2021 THE LENS WAS EXCHANGED FOR A DIFFERENT MODEL AND DIOPTER LENS. THIS EXCHANGE RESOLVED THE PROBLEM. CAUSE OF EVENT WAS UNKNOWN. Manufacturer Narrative: ADDITIONAL INFORMATION: H3-DEVICE EVALUATION: LENS RETURNED …
https://www.accessdata.fda.gov/scripts/cdrh/cfdocs/cfMAUDE/Detail.CFM?MDRFOI__ID=11620582&pc=MTA	2023826-2021-00867	2021-03-03 05:00:00	Injury	STAAR SURGICAL COMPANY	2021-04-06 04:00:00	MTA	IMPLANTABLE COLLAMER LENS	Misfocusing	Blurred Vision	NA	1	Event Description: THE REPORTER INDICATED THAT THE SURGEON IMPLANTED A 13.2MM VICMO13.2 IMPLANTABLE COLLAMER LENS, -6.5 DIOPTER, INTO THE PATIENT'S LEFT EYE (OS) ON (B)(6) 2021. REPORTEDLY, THE LENS WAS EXCHANGED ON (B)(6) 2021 WITH A SAME SIZE DIFFERENT DIOPTER LENS DUE TO REFRACTIVE SURPRISE. THE PROBLEM WAS RESOLVED. THE CAUSE OF THE EVENT IS REPORTED AS UNKNOWN. Manufacturer Narrative: ADDITI…
https://www.accessdata.fda.gov/scripts/cdrh/cfdocs/cfMAUDE/Detail.CFM?MDRFOI__ID=12378621&pc=MTA	2023826-2021-03375	2021-03-03 05:00:00	Injury	STAAR SURGICAL COMPANY	2021-08-27 04:00:00	MTA	IMPLANTABLE COLLAMER LENS	Misfocusing	Blurred Vision	NA	1	Event Description: THE REPORTER INDICATED THAT THE SURGEON IMPLANTED A 13.2MM VICMO13.2 IMPLANTABLE COLLAMER LENS, -16.0 DIOPTER INTO THE PATIENT'S RIGHT EYE (OD) ON (B)(6) 2021. REPORTEDLY, THE LENS WAS EXCHANGED ON (B)(6) 2021 WITH A SAME SIZE DIFFERENT DIOPTER LENS DUE TO REFRACTIVE SURPRISE. THE PROBLEM WAS RESOLVED. THE CAUSE OF THE EVENT IS REPORTED AS UNKNOWN. Manufacturer Narrative: ADDIT…
https://www.accessdata.fda.gov/scripts/cdrh/cfdocs/cfMAUDE/Detail.CFM?MDRFOI__ID=12207976&pc=MTA	2023826-2021-02749	2021-03-05 05:00:00	Injury	STAAR SURGICAL COMPANY	2021-07-21 04:00:00	MTA	IMPLANTABLE COLLAMER LENS (ICL)	Misfocusing	Blurred Vision	NA	1	Event Description: THE REPORTER INDICATED THAT A 12.1MM, VICMO12.1, -10.50 DIOPTER, IMPLANTABLE COLLAMER LENS WAS IMPLANTED INTO THE PATIENTS LEFT EYE (OS) ON (B)(6) 2020. ON (B)(6) 2021 THE LENS WAS EXCHANGED FOR A DIFFERENT MODEL AND DIOPTER LENS. THIS EXCHANGE RESOLVED THE PROBLEM. CAUSE OF EVENT WAS UNKNOWN. Manufacturer Narrative: ADDITIONAL INFORMATION: H3-DEVICE EVALUATION: LENS RETURNED I…
https://www.accessdata.fda.gov/scripts/cdrh/cfdocs/cfMAUDE/Detail.CFM?MDRFOI__ID=11683173&pc=MTA	2023826-2021-01074	2021-03-16 04:00:00	Injury	STAAR SURGICAL COMPANY	2021-04-17 04:00:00	MTA	IMPLANTABLE COLLAMER LENS (ICL)	Misfocusing	Blurred Vision	NA	1	Event Description: THE REPORTER INDICATED THAT A 13.7MM, VICMO13.7, -00.75 DIOPTER, IMPLANTABLE COLLAMER LENS WAS IMPLANTED INTO THE PATIENTS LEFT EYE (OS) ON (B)(6) 2016. REFRACTIVE CHANGE OVERTIME WAS OBSERVED. LENS REMAINS IMPLANTED. THE REPORTER STATED "PATIENT HAS TRIED TO GET AN ENHANCEMENT THERAPY ELSEWHERE AND HAS GOT A TRANS-PRK WIT -1.00 (DR. (B)(6)) THIS THERAPY HAD NO REFRACTIVE EFFEC…
https://www.accessdata.fda.gov/scripts/cdrh/cfdocs/cfMAUDE/Detail.CFM?MDRFOI__ID=11781991&pc=MTA	2023826-2021-01385	2021-03-19 04:00:00	Injury	STAAR SURGICAL COMPANY	2021-05-06 04:00:00	MTA	IMPLANTABLE COLLAMER LENS (ICL)	Misfocusing	Blurred Vision	NA	1	Event Description: THE REPORTER INDICATED THAT A 12.6MM, VICM5_12.6, -5.00 DIOPTER, IMPLANTABLE COLLAMER LENS WAS IMPLANTED INTO THE PATIENTS LEFT EYE (OS) ON (B)(6) 2020. ON (B)(6) 2021 THE LENS WAS EXCHANGED FOR A DIFFERENT DIOPTER LENS DUE TO REFRACTIVE SURPRISE. THIS EXCHANGE RESOLVED THE PROBLEM. CAUSE OF THIS EVENT IS UNKNOWN. Manufacturer Narrative: H3 - DEVICE EVALUATION: THE LENS WAS RET…
https://www.accessdata.fda.gov/scripts/cdrh/cfdocs/cfMAUDE/Detail.CFM?MDRFOI__ID=11782012&pc=MTA	2023826-2021-01386	2021-03-26 04:00:00	Injury	STAAR SURGICAL COMPANY	2021-05-06 04:00:00	MTA	IMPLANTABLE COLLAMER LENS (ICL)	Misfocusing	Blurred Vision	NA	1	Event Description: THE REPORTER INDICATED THAT A 12.6MM, VICM5_12.6, -4.00 DIOPTER, IMPLANTABLE COLLAMER LENS WAS IMPLANTED INTO THE PATIENTS LEFT EYE (OS) ON (B)(6) 2020. ON (B)(6) 2021 THE LENS WAS EXCHANGED FOR A MODEL AND DIFFERENT DIOPTER LENS DUE TO REFRACTIVE SURPRISE. THIS EXCHANGE RESOLVED THE PROBLEM. CAUSE OF THIS EVENT IS UNKNOWN. Manufacturer Narrative: H3: DEVICE EVALUATION: THE LEN…
https://www.accessdata.fda.gov/scripts/cdrh/cfdocs/cfMAUDE/Detail.CFM?MDRFOI__ID=11942685&pc=MTA	2023826-2021-01769	2021-04-15 04:00:00	Injury	STAAR SURGICAL COMPANY	2021-06-04 04:00:00	MTA	IMPLANTABLE COLLAMER LENS	Misfocusing	Blurred Vision	NA	1	Event Description: THE REPORTER INDICATED THAT THE SURGEON IMPLANTED A 12.6MM VICMO12.6 IMPLANTABLE COLLAMER LENS, -15.0 DIOPTER, INTO THE PATIENT'S RIGHT EYE (OD) ON (B)(6) 2021. REPORTEDLY, THE LENS WAS EXCHANGED ON (B)(6) 2021 WITH A SAME SIZE, DIFFERENT DIOPTER LENS DUE TO REFRACTIVE SURPRISE. THE PROBLEM WAS RESOLVED. THE CAUSE OF THE EVENT IS REPORTED AS UNKNOWN. Manufacturer Narrative: H3-…
https://www.accessdata.fda.gov/scripts/cdrh/cfdocs/cfMAUDE/Detail.CFM?MDRFOI__ID=12457492&pc=MTA	2023826-2021-03552	2021-04-19 04:00:00	Injury	STAAR SURGICAL COMPANY	2021-09-10 04:00:00	MTA	IMPLANTABLE COLLAMER LENS	Misfocusing	Blurred Vision	NA	1	Event Description: THE REPORTER INDICATED THAT THE SURGEON IMPLANTED A 12.6MM VICMO12.6 IMPLANTABLE COLLAMER LENS, -8.0 DIOPTER INTO THE PATIENT'S RIGHT EYE (OD) ON (B)(6) 2021. REPORTEDLY, THE LENS WAS EXCHANGED ON (B)(6) 2021 WITH A SAME SIZE DIFFERENT DIOPTER LENS DUE TO REFRACTIVE SURPRISE. THE PROBLEM WAS RESOLVED. THE CAUSE OF THE EVENT IS REPORTED AS UNKNOWN. Manufacturer Narrative: H3 - D…
https://www.accessdata.fda.gov/scripts/cdrh/cfdocs/cfMAUDE/Detail.CFM?MDRFOI__ID=12208015&pc=MTA	2023826-2021-02759	2021-04-22 04:00:00	Injury	STAAR SURGICAL COMPANY	2021-07-21 04:00:00	MTA	IMPLANTABLE COLLAMER LENS (ICL)	Misfocusing	Blurred Vision	NA	1	Event Description: THE REPORTER INDICATED THAT A 13.2MM, VICMO13.2, -7.5 DIOPTER, IMPLANTABLE COLLAMER LENS WAS IMPLANTED INTO THE PATIENTS RIGHT EYE (OD) ON (B)(6) 2021. ON (B)(6) 2021 THE LENS WAS EXCHANGED FOR A DIFFERENT DIOPTER LENS. THIS EXCHANGE RESOLVED THE PROBLEM. CAUSE OF EVENT WAS UNKNOWN. Manufacturer Narrative: ADDITIONAL INFORMATION; H3-DEVICE EVALUATION: LENS RETURNED IN A MICRO-C…
https://www.accessdata.fda.gov/scripts/cdrh/cfdocs/cfMAUDE/Detail.CFM?MDRFOI__ID=12524257&pc=MTA	2023826-2021-03720	2021-04-23 04:00:00	Injury	STAAR SURGICAL COMPANY	2021-09-24 04:00:00	MTA	IMPLANTABLE COLLAMER LENS (ICL)	Misfocusing	Blurred Vision	NA	1	Event Description: THE REPORTER INDICATED THAT A 13.2MM, VICMO13.2 -5.0 DIOPTER, IMPLANTABLE COLLAMER LENS WAS IMPLANTED INTO THE PATIENTS LEFT EYE (OS) ON (B)(6) 2021. ON (B)(6) 2021 THE LENS WAS EXCHANGED FOR A DIFFERENT MODEL AND DIOPTER LENS DUE TO REFRACTIVE SURPRISE. THIS EXCHANGE RESOLVED THE PROBLEM. CAUSE OF EVENT UNKNOWN. Manufacturer Narrative: H3: DEVICE EVALUATION:LENS WAS RETURNED I…
https://www.accessdata.fda.gov/scripts/cdrh/cfdocs/cfMAUDE/Detail.CFM?MDRFOI__ID=12524286&pc=MTA	2023826-2021-03719	2021-04-23 04:00:00	Injury	STAAR SURGICAL COMPANY	2021-09-24 04:00:00	MTA	IMPLANTABLE COLLAMER LENS (ICL)	Misfocusing	Blurred Vision	NA	1	Event Description: THE REPORTER INDICATED THAT A 13.2MM, VICMO13.2 -5.0 DIOPTER, IMPLANTABLE COLLAMER LENS WAS IMPLANTED INTO THE PATIENTS RIGHT EYE (OD) ON (B)(6) 2021. ON (B)(6) 2021 THE LENS WAS EXCHANGED FOR A DIFFERENT MODEL AND DIOPTER LENS DUE TO REFRACTIVE SURPRISE. THIS EXCHANGE RESOLVED THE PROBLEM. CAUSE OF EVENT UNKNOWN. Manufacturer Narrative: H3: DEVICE EVALUATION:LENS WAS RETURNED …
https://www.accessdata.fda.gov/scripts/cdrh/cfdocs/cfMAUDE/Detail.CFM?MDRFOI__ID=12072245&pc=MTA	2023826-2021-02086	2021-05-14 04:00:00	Injury	STAAR SURGICAL COMPANY	2021-06-25 04:00:00	MTA	IMPLANTABLE COLLAMER LENS	Misfocusing	Blurred Vision	NA	1	Event Description: THE REPORTER INDICATED THAT THE SURGEON IMPLANTED A 12.1MM VICM5_12.1 IMPLANTABLE COLLAMER LENS, -5.0 DIOPTER, INTO THE PATIENT'S LEFT EYE (OS) ON (B)(6) 2020. REPORTEDLY, THE LENS WAS EXCHANGED ON (B)(6) 2021 WITH A SAME SIZE, DIFFERENT MODEL LENS DUE TO REFRACTIVE SURPRISE. THE PROBLEM WAS RESOLVED. THE CAUSE OF THE EVENT IS REPORTED AS UNKNOWN. Manufacturer Narrative: ADDITI…
https://www.accessdata.fda.gov/scripts/cdrh/cfdocs/cfMAUDE/Detail.CFM?MDRFOI__ID=12072278&pc=MTA	2023826-2021-02085	2021-05-14 04:00:00	Injury	STAAR SURGICAL COMPANY	2021-06-25 04:00:00	MTA	IMPLANTABLE COLLAMER LENS	Misfocusing	Blurred Vision	NA	1	Event Description: THE REPORTER INDICATED THAT THE SURGEON IMPLANTED A 12.1MM VICM5_12.1 IMPLANTABLE COLLAMER LENS, -4.0 DIOPTER, INTO THE PATIENT'S RIGHT EYE (OD) ON (B)(6) 2020. REPORTEDLY, THE LENS WAS EXCHANGED ON (B)(6) 2021 WITH A SAME SIZE, DIFFERENT MODEL LENS DUE TO REFRACTIVE SURPRISE. THE PROBLEM WAS RESOLVED. THE CAUSE OF THE EVENT IS REPORTED AS UNKNOWN. Manufacturer Narrative: ADDIT…
https://www.accessdata.fda.gov/scripts/cdrh/cfdocs/cfMAUDE/Detail.CFM?MDRFOI__ID=12544805&pc=MTA	2023826-2021-03793	2021-05-16 04:00:00	Injury	STAAR SURGICAL COMPANY	2021-09-28 04:00:00	MTA	IMPLANTABLE COLLAMER LENS (ICL)	Misfocusing	Blurred Vision	NA	1	Event Description: THE REPORTER INDICATED THAT A 13.2MM, VICMO13.2, -4.50 DIOPTER, IMPLANTABLE COLLAMER LENS WAS IMPLANTED INTO THE PATIENTS LEFT EYE (OS) ON (B)(6) 2021. ON (B)(6) 2021 THE LENS WAS EXCHANGED WITH A DIFFERENT MODEL, LENGTH AND DIOPTER LENS DUE TO REFRACTIVE SURPRISE. THIS EXCHANGE RESOLVED THE PROBLEM. CAUSE OF EVENT WAS UNKNOWN. Manufacturer Narrative: H3 - DEVICE EVALUATION: TH…
https://www.accessdata.fda.gov/scripts/cdrh/cfdocs/cfMAUDE/Detail.CFM?MDRFOI__ID=12072479&pc=MTA	2023826-2021-02033	2021-05-18 04:00:00	Injury	STAAR SURGICAL COMPANY	2021-06-26 04:00:00	MTA	IMPLANTABLE COLLAMER LENS (ICL)	Misfocusing	Blurred Vision	NA	1	Event Description: THE REPORTER INDICATED THAT A 12.6MM, VICM5_12.6, -6.5 DIOPTER, IMPLANTABLE COLLAMER LENS WAS IMPLANTED INTO THE PATIENTS RIGHT EYE (OD) ON (B)(6) 2021. THE LENS WAS LATER EXPLANTED DUE TO VISUAL ACUITY NOT BEING AS EXPECTED AFTER SURGERY. CAUSE OF EVENT WAS UNKNOWN. IF ADDITIONAL INFORMATION IS RECEIVED A SUPPLEMENTAL MEDWATCH REPORT WILL BE SUBMITTED. Manufacturer Narrative: …
https://www.accessdata.fda.gov/scripts/cdrh/cfdocs/cfMAUDE/Detail.CFM?MDRFOI__ID=11986341&pc=MTA	2023826-2021-01874	2021-05-21 04:00:00	Malfunction	STAAR SURGICAL COMPANY	2021-06-11 04:00:00	MTA	IMPLANTABLE COLLAMER LENS (ICL)	Misfocusing	Blurred Vision	N/A	1	Event Description: THE REPORTER INDICATED THAT THE SURGEON IMPLANTED A 13.2MM VICM5_13.2 IMPLANTABLE COLLAMER LENS, -4.0 DIOPTER INTO THE PATIENT'S RIGHT EYE (OD) ON (B)(6) 2021. THE SURGEON REPORTS BLURRED NIGHT VISION DUE TO LARGE PUPIL SIZE. REPORTEDLY, THE LENS REMAINS IMPLANTED. Manufacturer Narrative: H6: INVESTIGATION TYPE 4110: LENS WORK ORDER SEARCH. NO SIMILAR COMPLAINT TYPE EVENTS REPO…
https://www.accessdata.fda.gov/scripts/cdrh/cfdocs/cfMAUDE/Detail.CFM?MDRFOI__ID=12791894&pc=MTA	2023826-2021-04319	2021-05-26 04:00:00	Injury	STAAR SURGICAL COMPANY	2021-11-10 05:00:00	MTA	IMPLANTABLE COLLAMER LENS (ICL)	Misfocusing	Blurred Vision	NA	1	Event Description: THE REPORTER INDICATED THAT A 12.6MM, VICM5_12.6, -9.50 DIOPTER, IMPLANTABLE COLLAMER LENS WAS IMPLANTED INTO THE PATIENTS LEFT EYE (OS) ON (B)(6) 2021. ON (B)(6) 2021 THE LENS WAS EXPLANTED DUE TO REFRACTIVE SURPRISE. A REPLACEMENT LENS OF DIFFERENT POWER WAS LATER IMPLANTED. IF ADDITIONAL INFORMATION IS RECEIVED A SUPPLEMENTAL MEDWATCH REPORT WILL BE SUBMITTED. Manufacturer N…
https://www.accessdata.fda.gov/scripts/cdrh/cfdocs/cfMAUDE/Detail.CFM?MDRFOI__ID=12257193&pc=MTA	2023826-2021-02977	2021-05-27	Injury	STAAR SURGICAL COMPANY	2021-07-31	MTA	IMPLANTABLE COLLAMER LENS (ICL)	Misfocusing	Blurred Vision	NA	1	Event Description: THE REPORTER INDICATED THE SURGEON IMPLANTED A 12.6MM VICMO12.6 IMPLANTABLE COLLAMER LENS, -05.50 DIOPTER, IN THE PATIENTS LEFT EYE (OS), ON (B)(6) 2021. THE LENS WAS EXPLANTED ON (B)(6) 2021 DUE TO THE PATIENT EXPERIENCED BLURRED VISION. THE SURGEON DID NOT IMPLANT ANOTHER ICL LENS. THE CAUSE OF THE EVENT WAS DUE TO PATIENT RELATED FACTOR. Manufacturer Narrative: THIS PRODUCT …
https://www.accessdata.fda.gov/scripts/cdrh/cfdocs/cfMAUDE/Detail.CFM?MDRFOI__ID=12524316&pc=MTA	2023826-2021-03722	2021-05-28 04:00:00	Injury	STAAR SURGICAL COMPANY	2021-09-24 04:00:00	MTA	IMPLANTABLE COLLAMER LENS (ICL)	Misfocusing	Blurred Vision	NA	1	Event Description: THE REPORTER INDICATED THAT A 13.7MM, VICMO13.7 -10.0 DIOPTER, IMPLANTABLE COLLAMER LENS WAS IMPLANTED INTO THE PATIENTS LEFT EYE (OS) ON (B)(6) 2021. ON (B)(6) 2021 THE LENS WAS EXCHANGED FOR A DIFFERENT MODEL AND DIOPTER LENS DUE TO REFRACTIVE SURPRISE. THIS EXCHANGE RESOLVED THE PROBLEM. CAUSE OF EVENT UNKNOWN. Manufacturer Narrative: H3: DEVICE EVALUATION:LENS WAS RETURNED …
https://www.accessdata.fda.gov/scripts/cdrh/cfdocs/cfMAUDE/Detail.CFM?MDRFOI__ID=12170553&pc=MTA	2023826-2021-02698	2021-06-04 04:00:00	Injury	STAAR SURGICAL COMPANY	2021-07-14 04:00:00	MTA	IMPLANTABLE COLLAMER LENS (ICL)	Misfocusing	Blurred Vision		1	Event Description: THE REPORTER INDICATED THAT A 12.6MM VICMO12.6; -12.0 DIOPTER IMPLANTABLE COLLAMER LENS WAS IMPLANTED INTO THE PATIENT'S RIGHT EYE (OD) ON (B)(6) 2021. THE PATIENT EXPERIENCED REFRACTIVE SURPRISE. ON (B)(6) 2021 THE LENS WAS EXCHANGED WITH A SAME MODEL/LENGTH LENS BUT DIFFERENT DIOPTER AND THIS RESOLVED THE PROBLEM. CAUSE OF THE EVENT WAS REPORTED AS UNKNOWN. Manufacturer Narra…
https://www.accessdata.fda.gov/scripts/cdrh/cfdocs/cfMAUDE/Detail.CFM?MDRFOI__ID=12222316&pc=MTA	2023826-2021-02809	2021-06-08 04:00:00	Injury	STAAR SURGICAL COMPANY	2021-07-23 04:00:00	MTA	IMPLANTABLE COLLAMER LENS	Misfocusing	Blurred Vision	NA	1	Event Description: THE REPORTER INDICATED THAT THE SURGEON IMPLANTED A 12.6MM VICMO12.6 IMPLANTABLE COLLAMER LENS, -16.5 DIOPTER INTO THE PATIENT'S RIGHT EYE (OD) ON (B)(6) 2021. REPORTEDLY, THE LENS WAS EXCHANGED ON (B)(6) 2021 WITH A SAME SIZE DIFFERENT DIOPTER LENS DUE TO REFRACTIVE SURPRISE. THE PROBLEM WAS RESOLVED. THE CAUSE OF THE EVENT IS REPORTED AS UNKNOWN. Manufacturer Narrative: ADDIT…
https://www.accessdata.fda.gov/scripts/cdrh/cfdocs/cfMAUDE/Detail.CFM?MDRFOI__ID=12872779&pc=MTA	2023826-2021-04511	2021-06-12 04:00:00	Malfunction	STAAR SURGICAL COMPANY	2021-11-24 05:00:00	MTA	IMPLANTABLE COLLAMER LENS (ICL)	Misfocusing	Blurred Vision	NA	1	Event Description: THE REPORTER INDICATED THAT A 13.2MM, VICMO_13.2, -9.00 DIOPTER, IMPLANTABLE COLLAMER LENS WAS IMPLANTED INTO THE PATIENTS RIGHT EYE (OD) ON (B)(6) 2021. REFRACTIVE SURPRISE WAS OBSERVED, LENS REMAINS IMPLANTED. IN THE REPORTERS OPINION THE CAUSE OF THIS EVENT WAS "OTHER", FOR CAUSE DETAILS THE REPORTER STATED " WRONG REFRACTION BY OPTOMETRIST." IT WAS REPORTED THAT THERE WAS A…
https://www.accessdata.fda.gov/scripts/cdrh/cfdocs/cfMAUDE/Detail.CFM?MDRFOI__ID=12178441&pc=MTA	2023826-2021-02712	2021-06-15 04:00:00	Injury	STAAR SURGICAL COMPANY	2021-07-15 04:00:00	MTA	IMPLANTABLE COLLAMER LENS	Misfocusing	Blurred Vision	NA	1	Event Description: THE REPORTER INDICATED THAT THE SURGEON IMPLANTED A 12.6MM VICM5_12.6 IMPLANTABLE COLLAMER LENS, -8.0 DIOPTER INTO THE PATIENT'S RIGHT EYE (OD) ON (B)(6) 2021. REPORTEDLY, THE LENS WAS EXCHANGED ON (B)(6) 2021 WITH A SAME SIZE, DIFFERENT DIOPTER LENS DUE TO REFRACTIVE SURPRISE. THE PROBLEM WAS RESOLVED. THE CAUSE OF THE EVENT IS REPORTED AS UNKNOWN. Manufacturer Narrative: H3 -…
https://www.accessdata.fda.gov/scripts/cdrh/cfdocs/cfMAUDE/Detail.CFM?MDRFOI__ID=12644985&pc=MTA	2023826-2021-04019	2021-06-16 04:00:00	Injury	STAAR SURGICAL COMPANY	2021-10-18 04:00:00	MTA	IMPLANTABLE COLLAMER LENS (ICL)	Misfocusing	Blurred Vision	NA	1	Event Description: THE REPORTER INDICATED THAT A 12.6MM, VICM6_12.6,-8.50 DIOPTER, IMPLANTABLE COLLAMER LENS WAS IMPLANTED INTO THE PATIENTS RIGHT EYE (OD) ON (B)(6) 2021. REFRACTIVE SURPRISE WAS REPORTED, LENS REMAINS IMPLANTED. FOR PATIENTS CURRENT CONDITION "FAR SIGHT NOT GOOD" WAS REPORTED. IN THE REPORTERS OPINION THE DEVICE WAS THE CAUSE OF THIS EVENT, FOR CAUSE DETAILS THE REPORTED STATED …
https://www.accessdata.fda.gov/scripts/cdrh/cfdocs/cfMAUDE/Detail.CFM?MDRFOI__ID=12378568&pc=MTA	2023826-2021-03363	2021-06-17 04:00:00	Injury	STAAR SURGICAL COMPANY	2021-08-27 04:00:00	MTA	IMPLANTABLE COLLAMER LENS	Misfocusing	Blurred Vision	NA	1	Event Description: THE REPORTER INDICATED THAT THE SURGEON IMPLANTED A 12.6MM VICMO12.6 IMPLANTABLE COLLAMER LENS, -9.5 DIOPTER, INTO THE PATIENT'S LEFT EYE (OS) ON (B)(6) 2021. ON (B)(6) 2021 THE LENS WAS EXCHANGED WITH A SAME SIZE DIFFERENT DIOPTER LENS-BOTH REFRACTIVE CHANGE OVER TIME AND REFRACTIVE SURPRISE ARE REPORTED. THE PROBLEM WAS RESOLVED. THE CAUSE OF THE EVENT IS REPORTED AS UNKNOWN.…
https://www.accessdata.fda.gov/scripts/cdrh/cfdocs/cfMAUDE/Detail.CFM?MDRFOI__ID=12222324&pc=MTA	2023826-2021-02814	2021-06-29	Malfunction	STAAR SURGICAL COMPANY	2021-07-23	MTA	IMPLANTABLE COLLAMER LENS (ICL)	Misfocusing	Blurred Vision	N/A	1	Event Description: THE REPORTER INDICATED THE SURGEON IMPLANTED A 12.6MM VICM5_12.6 IMPLANTABLE COLLAMER LENS, -8.5 DIOPTER INTO THE PATIENT'S LEFT EYE (OS) ON (B)(6) 2021. THE SURGEON REPORTS REFRACTIVE SURPRISE. Manufacturer Narrative: WEIGHT, ETHNICITY, RACE-UNK. PMA/510(K): THIS PRODUCT IS MANUFACTURED IN THE U.S. BUT NOT MARKETED IN THE U.S. (B)(4).
https://www.accessdata.fda.gov/scripts/cdrh/cfdocs/cfMAUDE/Detail.CFM?MDRFOI__ID=12725063&pc=MTA	2023826-2021-04166	2021-07-25 04:00:00	Injury	STAAR SURGICAL COMPANY	2021-10-30 04:00:00	MTA	IMPLANTABLE COLLAMER LENS (ICL)	Misfocusing	Blurred Vision	NA	1	Event Description: THE REPORTER INDICATED THAT A 12.1MM, VICMO12.1, -8.5 DIOPTER, IMPLANTABLE COLLAMER LENS WAS IMPLANTED INTO THE PATIENTS LEFT EYE (OS) ON (B)(6) 2021. ON (B)(6) 2021 THE LENS WAS EXCHANGED FOR A DIFFERENT MODEL AND POWER LENS DUE TO REFRACTIVE SURPRISE. THIS EXCHANGE RESOLVED THE PROBLEM. CAUSE OF EVENT WAS UNKNOWN. Manufacturer Narrative: H3- DEVICE EVALUATION: THE LENS WAS RE…
https://www.accessdata.fda.gov/scripts/cdrh/cfdocs/cfMAUDE/Detail.CFM?MDRFOI__ID=13082453&pc=MTA	2023826-2021-04969	2021-08-01 04:00:00	Injury	STAAR SURGICAL COMPANY	2021-12-23 05:00:00	MTA	IMPLANTABLE COLLAMER LENS	Misfocusing	Blurred Vision	NA	1	Event Description: THE REPORTER INDICATED THAT THE SURGEON IMPLANTED A 12.1MM VICM5_12.1 IMPLANTABLE COLLAMER LENS, -12.5 DIOPTER INTO THE PATIENT'S LEFT EYE (OS) ON (B)(6) 2021. REPORTEDLY, THE LENS WAS EXCHANGED ON (B)(6) 2021 WITH A LONGER LENGTH, DIFFERENT SIZE LENS DUE TO REFRACTIVE SURPRISE. THE PROBLEM WAS RESOLVED. THE CAUSE OF THE EVENT IS REPORTED AS UNKNOWN. Manufacturer Narrative: PT …
https://www.accessdata.fda.gov/scripts/cdrh/cfdocs/cfMAUDE/Detail.CFM?MDRFOI__ID=12426117&pc=MTA	2023826-2021-03444	2021-08-09 04:00:00	Injury	STAAR SURGICAL COMPANY	2021-09-03 04:00:00	MTA	IMPLANTABLE COLLAMER LENS	Misfocusing	Blurred Vision	P030016	1	Event Description: THE REPORTER STATES A VISIAN IMPLANTABLE COLLAMER LENS WAS IMPLANTED INTO THE PATIENT'SEYE. THE SURGEON REPORTS A POSTOP REFRACTION OF +2.25. ATTEMPTS TO OBTAIN ADDITIONAL INFORMATION HAVE NOT BEEN SUCCESSFUL. Manufacturer Narrative: A 13.2MM MICL13.2 WAS IMPLANTED INTO THE PATIENT'S LEFT (OS) EYE ON (B)(6) 2021. ON (B)(6) 2021 THE LENS WAS EXPLANTED AND THEN REPLACED WITH A SA…
https://www.accessdata.fda.gov/scripts/cdrh/cfdocs/cfMAUDE/Detail.CFM?MDRFOI__ID=12725238&pc=MTA	2023826-2021-04178	2021-08-18 04:00:00	Injury	STAAR SURGICAL COMPANY	2021-10-30 04:00:00	MTA	IMPLANTABLE COLLAMER LENS (ICL)	Misfocusing	Blurred Vision	NA	1	Event Description: THE REPORTER INDICATED THAT A 13.2MM, VICM5_13.2, -10.00 DIOPTER IMPLANTABLE COLLAMER LENS WAS IMPLANTED INTO THE PATIENTS LEFT EYE (OS) ON (B)(6) 2021. ON (B)(6) 2021 THE LENS WAS EXCHANGED FOR A DIFFERENT POWER LENS DUE TO REFRACTIVE SURPRISE. THIS EXCHANGE RESOLVED THE PROBLEM. CAUSE OF EVENT WAS UNKNOWN. Manufacturer Narrative: H3- DEVICE EVALUATION: THE LENS WAS RETURNED I…
https://www.accessdata.fda.gov/scripts/cdrh/cfdocs/cfMAUDE/Detail.CFM?MDRFOI__ID=12566510&pc=MTA	2023826-2021-03842	2021-08-27	Injury	STAAR SURGICAL COMPANY	2021-10-03	MTA	IMPLANTABLE COLLAMER LENS (ICL)	Misfocusing	Blurred Vision	NA	1	Event Description: THE REPORTER INDICATED THAT A 12.6MM, VICM5_12.6, -13.00 DIOPTER, IMPLANTABLE COLLAMER LENS WAS IMPLANTED INTO THE PATIENTS LEFT EYE (OS) ON (B)(6) 2021. ON (B)(6) 2021 THE LENS WAS EXCHANGED WITH A DIFFERENT MODEL AND POWER LENS DUE TO REFRACTIVE SURPRISE. THIS EXCHANGE RESOLVED THE PROBLEM. CAUSE OF EVENT WAS UNKNOWN. Manufacturer Narrative: WEIGHT: UNK, ETHNICITY: UNK, RACE:…
https://www.accessdata.fda.gov/scripts/cdrh/cfdocs/cfMAUDE/Detail.CFM?MDRFOI__ID=12523480&pc=MTA	2023826-2021-03690	2021-09-01 04:00:00	Malfunction	STAAR SURGICAL COMPANY	2021-09-23 04:00:00	MTA	IMPLANTABLE COLLAMER LENS	Misfocusing	Blurred Vision	P030016	1	Event Description: THE REPORTER STATES A 12.6MM MICL12.6 IMPLANTABLE COLLAMER LENS -13.5 DIOPTER WAS IMPLANTED INTO THE PATIENT'S LEFT (OS) EYE ON (B)(6) 2021. THE SURGEON REPORTS REFRACTIVE ERROR. Manufacturer Narrative: B5-UPDATED INFORMATION: ON (B)(6) 2021 THE LENS WAS EXPLANTED AND THEN REPLACED WITH A SAME SIZE DIFFERENT DIOPTER LENS DUE TO REFRACTIVE SURPRISE AND BLURRED VISION. THE CAUSE …
https://www.accessdata.fda.gov/scripts/cdrh/cfdocs/cfMAUDE/Detail.CFM?MDRFOI__ID=12725195&pc=MTA	2023826-2021-04172	2021-09-17 04:00:00	Injury	STAAR SURGICAL COMPANY	2021-10-30 04:00:00	MTA	IMPLANTABLE COLLAMER LENS (ICL)	Misfocusing	Blurred Vision	NA	1	Event Description: THE REPORTER INDICATED THAT A 12.1MM, VICMO12.1, -14.50 DIOPTER IMPLANTABLE COLLAMER LENS WAS IMPLANTED INTO THE PATIENTS LEFT EYE (OS) ON (B)(6) 2021. ON (B)(6) 2021 THE LENS WAS EXCHANGED FOR A DIFFERENT LENGTH AND POWER LENS DUE TO REFRACTIVE SURPRISE. THIS EXCHANGE RESOLVED THE PROBLEM. CAUSE OF EVENT WAS UNKNOWN. Manufacturer Narrative: H3- DEVICE EVALUATION: THE LENS WAS …
https://www.accessdata.fda.gov/scripts/cdrh/cfdocs/cfMAUDE/Detail.CFM?MDRFOI__ID=12909815&pc=MTA	2023826-2021-04616	2021-09-21 04:00:00	Injury	STAAR SURGICAL COMPANY	2021-12-01 05:00:00	MTA	IMPLANTABLE COLLAMER LENS (ICL)	Misfocusing	Blurred Vision		1	Event Description: THE REPORTER INDICATED THAT THE SURGEON IMPLANTED A 13.2MM VICMO13.2; -3.5 DIOPTER IMPLANTABLE COLLAMER LENS INTO THE PATIENT'S LEFT EYE (OS) ON (B)(6) 2021. ON (B)(6) 2021 THE LENS WAS EXCHANGED WITH A SAME LENGTH BUT DIFFERENT MODEL AND POWER LENS DUE TO REFRACTIVE SURPRISE. THIS RESOLVED THE PROBLEM. THE CAUSE OF THE EVENT WAS REPORTED AS UNKNOWN. Manufacturer Narrative: H3 …
https://www.accessdata.fda.gov/scripts/cdrh/cfdocs/cfMAUDE/Detail.CFM?MDRFOI__ID=12840513&pc=MTA	2023826-2021-04393	2021-09-25 04:00:00	Injury	STAAR SURGICAL COMPANY	2021-11-18 05:00:00	MTA	IMPLANTABLE COLLAMER LENS	Misfocusing	Blurred Vision	NA	1	Event Description: THE REPORTER INDICATED THAT THE SURGEON IMPLANTED A 13.2MM VICMO13.2 IMPLANTABLE COLLAMER LENS, -3.5 DIOPTER INTO THE PATIENT'S RIGHT EYE (OD) ON (B)(6) 2021. REPORTEDLY, THE LENS WAS EXCHANGED ON (B)(6) 2021 WITH A SAME SIZE DIFFERENT DIOPTER LENS DUE TO REFRACTIVE SURPRISE. THE PROBLEM WAS RESOLVED. THE CAUSE OF THE EVENT IS REPORTED AS UNKNOWN. Manufacturer Narrative: PT INF…
https://www.accessdata.fda.gov/scripts/cdrh/cfdocs/cfMAUDE/Detail.CFM?MDRFOI__ID=14246071&pc=MTA	2023826-2022-01311	2021-09-26 04:00:00	Injury	STAAR SURGICAL COMPANY	2022-04-28 04:00:00	MTA	IMPLANTABLE COLLAMER LENS (ICL)	Misfocusing	Blurred Vision	NA	1	Event Description: THE REPORTER INDICATED THAT A 12.1MM VICM5_12.1 IMPLANTABLE COLLAMER LENS OF -6.0 DIOPTER WAS IMPLANTED INTO THE PATIENT'S RIGHT EYE (OD) ON (B)(6) 2021. ON (B)(6) 2022 THE LENS WAS EXCHANGED WITH A DIFFERENT POWER LENS DUE TO REFRACTIVE SURPRISE. THE EXCHANGE RESOLVED THE PROBLEM. CAUSE IS REPORTED AS UNKNOWN. Manufacturer Narrative: WEIGHT-RACE: UNK. PMA/510(K): THIS PRODUCT …
https://www.accessdata.fda.gov/scripts/cdrh/cfdocs/cfMAUDE/Detail.CFM?MDRFOI__ID=14246554&pc=MTA	2023826-2022-01312	2021-09-26 04:00:00	Injury	STAAR SURGICAL COMPANY	2022-04-28 04:00:00	MTA	IMPLANTABLE COLLAMER LENS (ICL)	Misfocusing	Blurred Vision	NA	1	Event Description: THE REPORTER INDICATED THAT A 12.1MM VICM5_12.1 IMPLANTABLE COLLAMER LENS OF -6.0 DIOPTER WAS IMPLANTED INTO THE PATIENT'S LEFT EYE (OS) ON (B)(6) 2021. ON (B)(6) 2022 THE LENS WAS EXCHANGED WITH A DIFFERENT POWER LENS DUE TO REFRACTIVE SURPRISE. THE EXCHANGE RESOLVED THE PROBLEM. CAUSE IS REPORTED AS UNKNOWN. Manufacturer Narrative: H3: DEVICE EVALUATION: LENS WAS RETURNED IN …
https://www.accessdata.fda.gov/scripts/cdrh/cfdocs/cfMAUDE/Detail.CFM?MDRFOI__ID=14659120&pc=MTA	2023826-2022-01745	2021-10-09 04:00:00	Injury	STAAR SURGICAL COMPANY	2022-06-10 04:00:00	MTA	IMPLANTABLE COLLAMER LENS (ICL)	Misfocusing	Blurred Vision	P030016	1	Event Description: THE REPORTER INDICATED THAT A 12.1MM VICM5_12.1 IMPLANTABLE COLLAMER LENS OF -4.5 DIOPTER WAS IMPLANTED INTO THE PATIENT'S RIGHT EYE (OD) ON (B)(6) 2021. ON (B)(6) 2022 THE LENS WAS EXCHANGED WITH AN IDENTICAL LENS OF DIFFERENT DIOPTER DUE TO REFRACTIVE SURPRISE. THE EXCHANGE RESOLVED THE PROBLEM. Manufacturer Narrative: H3 DEVICE EVALUATION: THE LENS WAS RETURNED IN LIQUID IN …
https://www.accessdata.fda.gov/scripts/cdrh/cfdocs/cfMAUDE/Detail.CFM?MDRFOI__ID=13146229&pc=MTA	2023826-2022-00053	2021-10-12 04:00:00	Injury	STAAR SURGICAL COMPANY	2022-01-03 05:00:00	MTA	IMPLANTABLE COLLAMER LENS (ICL)	Misfocusing	Blurred Vision		1	Event Description: THE REPORTER INDICATED THAT THE SURGEON IMPLANTED A 12.6MM VICM5_12.6; -4.0 DIOPTER IMPLANTABLE COLLAMER LENS INTO THE PATIENT'S LEFT EYE (OS) ON (B)(6) 2021. THE PATIENT EXPERIENCE REFRACTIVE SURPRISE. ON (B)(6) 2021, THE LENS WAS EXCHANGED WITH A SAME MODEL/LENGTH BUT DIFFERENT DIOPTER LENS AND THIS RESOLVED THE PROBLEM. THE CAUSE OF THE EVENT WAS REPORTED AS "OTHER, REFRACTI…
https://www.accessdata.fda.gov/scripts/cdrh/cfdocs/cfMAUDE/Detail.CFM?MDRFOI__ID=13911555&pc=MTA	2023826-2022-00961	2021-10-12 04:00:00	Injury	STAAR SURGICAL COMPANY	2022-03-25 04:00:00	MTA	IMPLANTABLE COLLAMER LENS	Misfocusing	Blurred Vision	NA	1	Event Description: THE REPORTER INDICATED THAT THE SURGEON IMPLANTED A 12.1MM VICMO12.1 IMPLANTABLE COLLAMER LENS -15.0 DIOPTER INTO THE PATIENT'S LEFT EYE (OS) ON (B)(6) 2021. ON (B)(6) 2021 WITH A SAME SIZE DIFFERENT DIOPTER LENS DUE TO REFRACTIVE SURPRISE. THE PROBLEM WAS RESOLVED. THE CAUSE OF THE EVENT IS REPORTED AS UNKNOWN. Manufacturer Narrative: WEIGHT, ETHNICITY, RACE-UNK. PMA/510(K): T…
https://www.accessdata.fda.gov/scripts/cdrh/cfdocs/cfMAUDE/Detail.CFM?MDRFOI__ID=13182540&pc=MTA	2023826-2022-00029	2021-10-25 04:00:00	Injury	STAAR SURGICAL COMPANY	2022-01-06 05:00:00	MTA	IMPLANTABLE COLLAMER LENS	Misfocusing	Blurred Vision	NA	1	Event Description: THE REPORTER INDICATED THAT THE SURGEON IMPLANTED A 13.2MM VICMO13.2 IMPLANTABLE COLLAMER LENS, -16.5 DIOPTER INTO THE PATIENT'S RIGHT EYE (OD) ON (B)(6) 2021. REPORTEDLY, THE LENS WAS EXCHANGED ON (B)(6) 2021 WITH A SAME SIZE DIFFERENT DIOPTER LENS DUE TO REFRACTIVE SURPRISE. THE PROBLEM WAS RESOLVED. THE CAUSE OF THE EVENT IS REPORTED AS UNKNOWN. Manufacturer Narrative: WEIGH…
https://www.accessdata.fda.gov/scripts/cdrh/cfdocs/cfMAUDE/Detail.CFM?MDRFOI__ID=13182541&pc=MTA	2023826-2022-00030	2021-10-25 04:00:00	Injury	STAAR SURGICAL COMPANY	2022-01-06 05:00:00	MTA	IMPLANTABLE COLLAMER LENS	Misfocusing	Blurred Vision	NA	1	Event Description: THE REPORTER INDICATED THAT THE SURGEON IMPLANTED A 13.2MM VICMO13.2 IMPLANTABLE COLLAMER LENS, -16.0 DIOPTER INTO THE PATIENT'S LEFT EYE (OS) ON (B)(6) 2021. REPORTEDLY, THE LENS WAS EXCHANGED ON (B)(6) 2021 WITH A SAME SIZE DIFFERENT MODEL LENS DUE TO REFRACTIVE SURPRISE. THE PROBLEM WAS RESOLVED. THE CAUSE OF THE EVENT IS REPORTED AS UNKNOWN. REPORTEDLY THE LENS WAS REPLACED…
https://www.accessdata.fda.gov/scripts/cdrh/cfdocs/cfMAUDE/Detail.CFM?MDRFOI__ID=13983927&pc=MTA	2023826-2022-01048	2021-10-27 04:00:00	Malfunction	STAAR SURGICAL COMPANY	2022-04-01 04:00:00	MTA	IMPLANTABLE COLLAMER LENS (ICL)	Misfocusing	Blurred Vision	NA	1	Event Description: THE REPORTER INDICATED THAT A 12.6MM VICM5_12.6 IMPLANTABLE COLLAMER LENS OF -2.75 DIOPTER WAS IMPLANTED INTO THE PATIENT'S LEFT EYE (OS) ON (B)(6) 2021. THE PATIENT EXPERIENCED REFRACTIVE SURPRISE, LENS REMAINS IMPLANTED. IT WAS REPORTED THAT THE PATIENT IS WEARING GLASSES. IN THE REPORTERS OPINION THE CAUSE OF THIS EVENT IS THE DEVICE. IF ADDITIONAL INFORMATION IS RECEIVED A …
https://www.accessdata.fda.gov/scripts/cdrh/cfdocs/cfMAUDE/Detail.CFM?MDRFOI__ID=12973349&pc=MTA	2023826-2021-04699	2021-11-08 05:00:00	Injury	STAAR SURGICAL COMPANY	2021-12-09 05:00:00	MTA	IMPLANTABLE COLLAMER LENS (ICL)	Misfocusing	Blurred Vision	N/A	1	Event Description: THE REPORTER INDICATED THE SURGEON IMPLANTED A 12.6MM VICM5_12.6 IMPLANTABLE COLLAMER LENS, -6.5 DIOPTER INTO THE PATIENT'S LEFT EYE (OS) ON (B)(6) 2021. THE SURGEON REPORTS REFRACTIVE SURPRISE. THE CAUSE OF THE EVENT IS REPORTED AS OTHER: "ASTIGMATISM AND KERATOMETRY FROM THE START." THE REPORTER STATES THAT POSSIBLY THE SURGEON UNDERESTIMATED THE ASTIGMATISM-KERATOMETRY GIVES…
https://www.accessdata.fda.gov/scripts/cdrh/cfdocs/cfMAUDE/Detail.CFM?MDRFOI__ID=13459224&pc=MTA	2023826-2022-00389	2021-11-19 05:00:00	Injury	STAAR SURGICAL COMPANY	2022-02-04 05:00:00	MTA	IMPLANTABLE COLLAMER LENS (ICL)	Misfocusing	Blurred Vision	N/A	1	Event Description: THE REPORTER INDICATED THE SURGEON IMPLANTED A 12.6MM VICMO12.6 IMPLANTABLE COLLAMER LENS, DIOPTER -9.0 INTO THE PATIENT'S LEFT EYE (OS) ON (B)(6) 2021. ON (B)(6) 2021 THE LENS WAS EXCHANGED WITH A SAME SIZE DIFFERENT MODEL LENS DUE TO BLURRED VISION. THE CAUSE OF THE EVENT IS REPORTED AS UNKNOWN. SEE MFR REP# 2023826-2022-00392 FOR REPLACEMENT LENS. Manufacturer Narrative: WEI…
https://www.accessdata.fda.gov/scripts/cdrh/cfdocs/cfMAUDE/Detail.CFM?MDRFOI__ID=13317681&pc=MTA	2023826-2022-00204	2021-11-24 05:00:00	Injury	STAAR SURGICAL COMPANY	2022-01-21 05:00:00	MTA	IMPLANTABLE COLLAMER LENS	Misfocusing	Blurred Vision	NA	1	Event Description: THE REPORTER INDICATED THAT THE SURGEON IMPLANTED A 12.6MM VICMO12.6 IMPLANTABLE COLLAMER LENS -14.0 DIOPTER INTO THE PATIENT'S RIGHT EYE (OD) ON (B)(6) 2021. REPORTEDLY, THE LENS WAS EXCHANGED ON (B)(6) 2021 WITH A SAME SIZE DIFFERENT DIOPTER LENS DUE TO REFRACTIVE SURPRISE. THE PROBLEM WAS RESOLVED. THE CAUSE OF THE EVENT IS REPORTED AS UNKNOWN. Manufacturer Narrative: H3- DE…
https://www.accessdata.fda.gov/scripts/cdrh/cfdocs/cfMAUDE/Detail.CFM?MDRFOI__ID=14862585&pc=MTA	2023826-2022-01899	2021-11-24 05:00:00	Injury	STAAR SURGICAL COMPANY	2022-06-29 04:00:00	MTA	IMPLANTABLE COLLAMER LENS (ICL)	Misfocusing	Blurred Vision	P030016	1	Event Description: THE REPORTER INDICATED THAT A 12.1MM VICM5_12.1 IMPLANTABLE COLLAMER LENS OF -5.5 DIOPTER WAS IMPLANTED INTO THE PATIENT'S RIGHT EYE (OD) ON (B)(6) 2021. ON (B)(6) 2021 THE LENS WAS EXCHANGED WITH A LONGER LENS OF DIFFERENT DIOPTER DUE TO REFRACTIVE SURPRISE. THE EXCHANGE RESOLVED THE PROBLEM. Manufacturer Narrative: LENS WORK ORDER SEARCH: NO SIMILAR COMPLAINTS REPORTED FOR UN…
https://www.accessdata.fda.gov/scripts/cdrh/cfdocs/cfMAUDE/Detail.CFM?MDRFOI__ID=13173031&pc=MTA	2023826-2022-00099	2021-12-06 05:00:00	Injury	STAAR SURGICAL COMPANY	2022-01-05 05:00:00	MTA	IMPLANTABLE COLLAMER LENS (ICL)	Misfocusing	Blurred Vision		1	Event Description: THE REPORTER INDICATED THAT THE SURGEON IMPLANTED A 13.7MM VICMO13.7; -15.5 DIOPTER IMPLANTABLE COLLAMER LENS INTO THE PATIENT'S LEFT EYE (OS) ON (B)(6) 2021. THE PATIENT EXPERIENCED REFRACTIVE SURPRISE AND ALSO REFRACTIVE CHANGE OVER TIME. ON (B)(6) 2021 THE LENS WAS EXCHANGED WITH A SAME LENGTH BUT DIFFERENT MODEL/POWER LENS AND THIS RESOLVED THE PROBLEM. THE CAUSE OF THE EVE…
https://www.accessdata.fda.gov/scripts/cdrh/cfdocs/cfMAUDE/Detail.CFM?MDRFOI__ID=15738720&pc=MTA	2023826-2022-03992	2021-12-13 05:00:00	Injury	STAAR SURGICAL COMPANY	2022-11-04 04:00:00	MTA	IMPLANTABLE COLLAMER LENS (ICL)	Misfocusing	Blurred Vision	P030016	1	Event Description: THE REPORTER INDICATED THAT THE SURGEON IMPLANTED A 13.2MM VICM5_13.2; -5.50 DIOPTER IMPLANTABLE COLLAMER LENS INTO THE PATIENT'S RIGHT EYE (OD) ON (B)(6) 2021. IT WAS INDICATED THE PATIENT HAD PERMANENT LOSS OF BCVA AND BLURRED VISION. THE CAUSE OF THE EVENT WAS REPORTED AS "OTHER" AND NOTED "RESIDUAL ASTIGMATISM REMAINS". THE LENS WAS EXPLANTED. ON (B)(6) 2022 A REPLACEMENT L…
https://www.accessdata.fda.gov/scripts/cdrh/cfdocs/cfMAUDE/Detail.CFM?MDRFOI__ID=14862904&pc=MTA	2023826-2022-01905	2021-12-30 05:00:00	Injury	STAAR SURGICAL COMPANY	2022-06-29 04:00:00	MTA	IMPLANTABLE COLLAMER LENS (ICL)	Misfocusing	Blurred Vision	P030016	1	Event Description: THE REPORTER INDICATED THAT A 12.1MM VICM5_12.1 IMPLANTABLE COLLAMER LENS OF -2.75 DIOPTER WAS IMPLANTED INTO THE PATIENT'S LEFT EYE (OS) ON (B)(6) 2021. ON (B)(6) 2022 THE LENS WAS EXCHANGED WITH A LENS OF DIFFERENT DIOPTER DUE TO REFRACTIVE SURPRISE. THE EXCHANGE RESOLVED THE PROBLEM. Manufacturer Narrative: (B)(4). Manufacturer Narrative: DEVICE EVALUATION: H3 - DEVICE EVALU…
https://www.accessdata.fda.gov/scripts/cdrh/cfdocs/cfMAUDE/Detail.CFM?MDRFOI__ID=13981610&pc=MTA	2023826-2022-01046	2022-01-05 05:00:00	Injury	STAAR SURGICAL COMPANY	2022-04-01 04:00:00	MTA	IMPLANTABLE COLLAMER LENS (ICL)	Misfocusing	Blurred Vision	NA	1	Event Description: THE REPORTER INDICATED THAT A 12.6MM VICM5_12.6 IMPLANTABLE COLLAMER LENS OF -5.0 DIOPTER WAS IMPLANTED INTO THE PATIENT'S RIGHT EYE (OD) ON (B)(6) 2021. ON (B)(6) 2022 THE LENS WAS EXCHANGED WITH A DIFFERENT DIOPTER LENS DUE TO REFRACTIVE SURPRISE. THE EXCHANGE RESOLVED THE PROBLEM. CAUSE IS REPORTED AS UNKNOWN. Manufacturer Narrative: THIS PRODUCT IS NOT MARKETED IN THE U.S. …
https://www.accessdata.fda.gov/scripts/cdrh/cfdocs/cfMAUDE/Detail.CFM?MDRFOI__ID=13998315&pc=MTA	2023826-2022-00978	2022-01-15 05:00:00	Injury	STAAR SURGICAL COMPANY	2022-04-04 04:00:00	MTA	IMPLANTABLE COLLAMER LENS (ICL)	Misfocusing	Blurred Vision	NA	1	Event Description: THE REPORTER INDICATED THAT A 12.6MM VICMO12.6 IMPLANTABLE COLLAMER LENS OF -3.5 DIOPTER WAS IMPLANTED INTO THE PATIENT'S LEFT EYE (OS) ON (B)(6) 2021. ON (B)(6) 2022 THE LENS WAS EXCHANGED WITH A NEW MODEL LENS OF DIFFERENT DIOPTER DUE TO REFRACTIVE SURPRISE AND GHOSTING. THE EXCHANGE RESOLVED THE PROBLEM. CAUSE IS REPORTED AS UNKNOWN. Manufacturer Narrative: H3 - DEVICE EVALU…
https://www.accessdata.fda.gov/scripts/cdrh/cfdocs/cfMAUDE/Detail.CFM?MDRFOI__ID=14862403&pc=MTA	2023826-2022-02091	2022-02-03 05:00:00	Injury	STAAR SURGICAL COMPANY	2022-06-29 04:00:00	MTA	IMPLANTABLE COLLAMER LENS (ICL)	Misfocusing	Blurred Vision	P030016	1	Event Description: THE REPORTER INDICATED THAT THE SURGEON IMPLANTED A 12.6MM VICM5_12.6; -8.00 DIOPTER IMPLANTABLE COLLAMER LENS INTO THE PATIENT'S LEFT EYE (OS) ON (B)(6) 2022. THE PATIENT EXPERIENCED REFRACTIVE SURPRISE. ON (B)(6) 2022 THE LENS WAS EXCHANGED WITH A SAME MODEL/LENGTH LENS BUT DIFFERENT POWER. THIS RESOLVED THE PROBLEM. Manufacturer Narrative: H3 - DEVICE EVALUATION: LENS WAS RE…
https://www.accessdata.fda.gov/scripts/cdrh/cfdocs/cfMAUDE/Detail.CFM?MDRFOI__ID=14504752&pc=MTA	2023826-2022-01688	2022-02-09 05:00:00	Injury	STAAR SURGICAL COMPANY	2022-05-26 04:00:00	MTA	IMPLANTABLE COLLAMER LENS (ICL)	Misfocusing	Blurred Vision	P030016	1	Event Description: THE REPORTER INDICATED THAT THE SURGEON IMPLANTED A 13.2MM VICMO13.2; -6.5 DIOPTER IMPLANTABLE COLLAMER LENS INTO THE PATIENT'S LEFT EYE (OS) ON (B)(6) 2020. THE PATIENT EXPERIENCED REFRACTIVE SURPRISE. ON (B)(6) 2022 THE LENS WAS EXCHANGED WITH A SAME SIZE BUT DIFFERENT POWER LENS AND THIS RESOLVED THE PROBLEM. THE CAUSE OF THE EVENT WAS REPORTED AS UNKNOWN. Manufacturer Narra…
https://www.accessdata.fda.gov/scripts/cdrh/cfdocs/cfMAUDE/Detail.CFM?MDRFOI__ID=13795182&pc=MTA	2023826-2022-00797	2022-02-16 05:00:00	Malfunction	STAAR SURGICAL COMPANY	2022-03-17 04:00:00	MTA	IMPLANTABLE COLLAMER LENS (ICL)	Misfocusing	Blurred Vision	NA	1	Event Description: THE REPORTER INDICATED THE SURGEON IMPLANTED A 13.2MM VICM6_13.2 IMPLANTABLE COLLAMER LENS, -09.00 DIOPTER, INTO THE PATIENTS RIGHT EYE (OD) ON (B)(6) 2021. THE PATIENT COMPLAINED OF BLURRY/FOGGY VISION WHEN THE LIGHT CONDITIONS GO FROM DARK TO LIGHT. THE LENS REMAINED IMPLANTED. THE CAUSE OF THE EVENT WAS UNKNOWN. ADDITIONAL INFORMATION HAS BEEN REQUESTED BUT NONE HAS BEEN FOR…
https://www.accessdata.fda.gov/scripts/cdrh/cfdocs/cfMAUDE/Detail.CFM?MDRFOI__ID=13944339&pc=MTA	2023826-2022-01025	2022-02-24 05:00:00	Injury	STAAR SURGICAL COMPANY	2022-03-29 04:00:00	MTA	IMPLANTABLE COLLAMER LENS (ICL)	Misfocusing	Blurred Vision		1	Event Description: THE REPORTER INDICATED THAT THE SURGEON IMPLANTED A 13.2MM VICM5_13.2; -8.00 DIOPTER IMPLANTABLE COLLAMER LENS INTO THE PATIENT'S LEFT EYE (OS) ON (B)(6) 2021. THE SURGEON REPORTS REFRACTIVE SURPRISE WITH A PLANNED LENS EXCHANGE. LENS REMAINS IMPLANTED. ATTEMPTS TO OBTAIN ADDITIONAL INFORMATION HAVE NOT BEEN SUCCESSFUL. IF ADDITIONAL INFORMATION IS RECEIVED A SUPPLEMENTAL MEDWA…
https://www.accessdata.fda.gov/scripts/cdrh/cfdocs/cfMAUDE/Detail.CFM?MDRFOI__ID=13944425&pc=MTA	2023826-2022-01024	2022-02-24 05:00:00	Injury	STAAR SURGICAL COMPANY	2022-03-29 04:00:00	MTA	IMPLANTABLE COLLAMER LENS (ICL)	Misfocusing	Blurred Vision		1	Event Description: THE REPORTED INDICATED THAT THE SURGEON IMPLANTED A 13.2MM VICM5_13.2; -8.00 DIOPTER IMPLANTABLE COLLAMER LENS INTO THE PATIENT'S RIGHT EYE (OD) ON (B)(4) 2021. THE SURGEON REPORTS REFRACTIVE SURPRISE WITH A PLANNED LENS EXCHANGE. LENS REMAINS IMPLANTED. ATTEMPTS TO OBTAIN ADDITIONAL INFORMATION HAVE NOT BEEN SUCCESSFUL. IF ADDITIONAL INFORMATION IS RECEIVED A SUPPLEMENTAL MEDW…
https://www.accessdata.fda.gov/scripts/cdrh/cfdocs/cfMAUDE/Detail.CFM?MDRFOI__ID=14365578&pc=MTA	2023826-2022-01518	2022-02-25 05:00:00	Injury	STAAR SURGICAL COMPANY	2022-05-11 04:00:00	MTA	IMPLANTABLE COLLAMER LENS (ICL)	Misfocusing	Blurred Vision	P030016	1	Event Description: THE REPORTER INDICATED THAT A 12.1MM VICM5 12.1 IMPLANTABLE COLLAMER LENS OF -8.50 DIOPTER WAS IMPLANTED INTO THE PATIENT'S LEFT EYE (OS) ON (B)(6) 2022. REFRACTIVE SURPRISE WAS OBSERVED. ON (B)(6) 2022 THE LENS WAS EXCHANGED FOR A SAME MODEL AND SIZE BUT -9.0 DIOPTER. THE EXCHANGE LENS RESOLVED THE PROBLEM. Manufacturer Narrative: H3 DEVICE EVALUATION: THE LENS WAS RETURNED DR…
https://www.accessdata.fda.gov/scripts/cdrh/cfdocs/cfMAUDE/Detail.CFM?MDRFOI__ID=16720053&pc=MTA	2023826-2023-01357	2022-03-18 04:00:00	Injury	STAAR SURGICAL COMPANY	2023-04-11 04:00:00	MTA	IMPLANTABLE COLLAMER LENS (ICL)	Misfocusing	Blurred Vision	P030016	1	Event Description: THE REPORTER INDICATED THAT THE SURGEON IMPLANTED A 12.1MM VICMO12.1; -9.0 DIOPTER IMPLANTABLE COLLAMER LENS INTO THE PATIENT'S RIGHT EYE (OD) ON (B)(6) 2022. THE PATIENT EXPERIENCED REFRACTIVE SURPRISE. ON 11-FEB-2023 THE LENS WAS EXCHANGED WITH THE SAME LENGTH LENS BUT TORIC MODEL. THIS RESOLVED THE PROBLEM. THE CAUSE OF THE EVENT WAS REPORTED AS UNKNOWN. Manufacturer Narrati…
https://www.accessdata.fda.gov/scripts/cdrh/cfdocs/cfMAUDE/Detail.CFM?MDRFOI__ID=14220682&pc=MTA	2023826-2022-01098	2022-03-24 04:00:00	Malfunction	STAAR SURGICAL COMPANY	2022-04-27 04:00:00	MTA	IMPLANTABLE COLLAMER LENS (ICL)	Misfocusing	Blurred Vision	NA	1	Event Description: THE REPORTER INDICATED THAT A 12.1MM VICM6_12.1 IMPLANTABLE COLLAMER LENS OF -7.00 DIOPTER WAS IMPLANTED INTO THE PATIENT'S RIGHT EYE (OD) ON (B)(6) 2022. REFRACTIVE SURPRISE REPORTED WITH -1.50 SPHERE RESIDUAL ERROR. LENS REMAINS IMPLANTED. CAUSE IS REPORTED AS UNKNOWN. Manufacturer Narrative: CLAIM# (B)(4).
https://www.accessdata.fda.gov/scripts/cdrh/cfdocs/cfMAUDE/Detail.CFM?MDRFOI__ID=14220740&pc=MTA	2023826-2022-01099	2022-03-24 04:00:00	Malfunction	STAAR SURGICAL COMPANY	2022-04-27 04:00:00	MTA	IMPLANTABLE COLLAMER LENS (ICL)	Misfocusing	Blurred Vision	NA	1	Event Description: THE REPORTER INDICATED THAT A 12.1MM VICM6_12.1 IMPLANTABLE COLLAMER LENS OF -6.00 DIOPTER WAS IMPLANTED INTO THE PATIENT'S LEFT EYE (OS) ON (B)(6) 2022. REFRACTIVE SURPRISE REPORTED WITH -1.75 SPHERE RESIDUAL ERROR. LENS REMAINS IMPLANTED. CAUSE IS REPORTED AS UNKNOWN. Manufacturer Narrative: THIS PRODUCT IS NOT MARKETED IN THE US. CLAIM# (B)(4).
https://www.accessdata.fda.gov/scripts/cdrh/cfdocs/cfMAUDE/Detail.CFM?MDRFOI__ID=14862698&pc=MTA	2023826-2022-02025	2022-04-01 04:00:00	Injury	STAAR SURGICAL COMPANY	2022-06-29 04:00:00	MTA	IMPLANTABLE COLLAMER LENS (ICL)	Misfocusing	Blurred Vision	P030016	1	Event Description: THE REPORTER INDICATED THAT A 13.2MM VICMO13.2 IMPLANTABLE COLLAMER LENS OF -15.5 DIOPTER WAS IMPLANTED INTO THE PATIENT'S LEFT EYE (OS) ON (B)(6) 2022. ON (B)(6) 2022 THE LENS WAS EXCHANGED WITH A SAME LENGTH LENS OF DIFFERENT DIOPTER DUE TO REFRACTIVE SURPRISE. THE EXCHANGE RESOLVED THE PROBLEM. CAUSE OF THE EVENT IS UNKNOWN. Manufacturer Narrative: H6: TYPE OF INVESTIGATION …
https://www.accessdata.fda.gov/scripts/cdrh/cfdocs/cfMAUDE/Detail.CFM?MDRFOI__ID=15801811&pc=MTA	2023826-2022-03954	2022-04-04 04:00:00	Injury	STAAR SURGICAL COMPANY	2022-11-15 05:00:00	MTA	IMPLANTABLE COLLAMER LENS (ICL)	Misfocusing	Blurred Vision	P030016	1	Event Description: THE REPORTER INDICATED THAT A 12.6MM VICM512.6 IMPLANTABLE COLLAMER LENS OF -7.5 DIOPTER WAS IMPLANTED IN THE PATIENT'S LEFT EYE (OS). ON (B)(6) 2022, THE LENS WAS REMOVED AND REPLACED DUE TO REFRACTIVE SURPRISE. Manufacturer Narrative: DEVICE EVALUATED BY MFR: WORK ORDER SEARCH FOUND NO SIMILAR COMPLAINTS. CLAIM# (B)(4). Manufacturer Narrative: B5: LENS WAS IMPLANTED ON (B)(6)…
https://www.accessdata.fda.gov/scripts/cdrh/cfdocs/cfMAUDE/Detail.CFM?MDRFOI__ID=14417748&pc=MTA	2023826-2022-01591	2022-04-06 04:00:00	Injury	STAAR SURGICAL COMPANY	2022-05-17 04:00:00	MTA	IMPLANTABLE COLLAMER LENS (ICL)	Misfocusing	Blurred Vision	P030016	1	Event Description: THE REPORTER INDICATED THAT THE SURGEON IMPLANTED A 12.6MM VICM6; -6.00 DIOPTER IMPLANTABLE COLLAMER LENS INTO THE PATIENT'S RIGHT EYE (OD) ON (B)(6) 2022. THE PATIENT HAS PERMANENT LOSS OF BCVA AND IT WAS NOTED "PATIENT HAS COMPLAINTS OF POOR FAR AND NEAR VISION". LENS REMAINS IMPLANTED. Manufacturer Narrative: ADDITIONAL INFORMATION: B5 - THE REPORTER INDICATED THAT THE SURGE…
https://www.accessdata.fda.gov/scripts/cdrh/cfdocs/cfMAUDE/Detail.CFM?MDRFOI__ID=14455997&pc=MTA	2023826-2022-01621	2022-04-11 04:00:00	Malfunction	STAAR SURGICAL COMPANY	2022-05-20 04:00:00	MTA	IMPLANTABLE COLLAMER LENS (ICL)	Misfocusing	Blurred Vision	NA	1	Event Description: THE REPORTER INDICATED THAT A PATIENT HAS COMPLAINTS IN LEFT EYE (OS) OF POOR FAR AND NEAR VISION POST VIVA IMPLANTABLE COLLAMER LENS IMPLANTATION. LENS REMAINS IMPLANTED. ADDITIONAL INFORMATION HAS BEEN REQUESTED BUT NONE HAS BEEN FORTHCOMING. IF ADDITIONAL INFORMATION IS RECEIVED A SUPPLEMENTAL MEDWATCH REPORT WILL BE SUBMITTED. Manufacturer Narrative: B5-THE REPORTER INDICAT…
https://www.accessdata.fda.gov/scripts/cdrh/cfdocs/cfMAUDE/Detail.CFM?MDRFOI__ID=15153652&pc=MTA	2023826-2022-02582	2022-05-10 04:00:00	Injury	STAAR SURGICAL COMPANY	2022-08-02 04:00:00	MTA	IMPLANTABLE COLLAMER LENS (ICL)	Misfocusing	Blurred Vision	P030016	1	Event Description: THE REPORTER INDICATED THAT A 12.1MM VICM5_12.1 IMPLANTABLE COLLAMER LENS OF -12.0 DIOPTER WAS IMPLANTED INTO THE PATIENT'S LEFT EYE (OS) ON (B)(6) 2022. ON (B)(6) 2022 THE LENS WAS EXCHANGED FOR A DIFFERENT POWER LENS DUE TO REFRACTIVE SURPRISE. THE EXCHANGE RESOLVED THE PROBLEM. CAUSE IS REPORTED AS UNKNOWN. Manufacturer Narrative: (B)(4). CLAIM# (B)(4). Manufacturer Narrativ…
https://www.accessdata.fda.gov/scripts/cdrh/cfdocs/cfMAUDE/Detail.CFM?MDRFOI__ID=15061062&pc=MTA	2023826-2022-02329	2022-05-12 04:00:00	Injury	STAAR SURGICAL COMPANY	2022-07-19 04:00:00	MTA	IMPLANTABLE COLLAMER LENS (ICL)	Misfocusing	Blurred Vision	P030016	1	Event Description: THE REPORTER INDICATED THAT THE SURGEON IMPLANTED A 13.2MM VICM5_13.2; -5.00 DIOPTER IMPLANTABLE COLLAMER LENS INTO THE PATIENT'S RIGHT EYE (OD) ON (B)(6) 2022. THE PATIENT EXPERIENCED REFRACTIVE SURPRISE. ON (B)(6) 2022 THE LENS WAS EXCHANGE WITH A SAME LENGTH/MODEL LENS BUT DIFFERENT POWER AND THE PROBLEM WAS RESOLVED. THE CAUSE OF THE EVENT WAS REPORTED AS USER ERROR AND IT …
https://www.accessdata.fda.gov/scripts/cdrh/cfdocs/cfMAUDE/Detail.CFM?MDRFOI__ID=16423702&pc=MTA	2023826-2023-00619	2022-05-18 04:00:00	Injury	STAAR SURGICAL COMPANY	2023-02-22 05:00:00	MTA	IMPLANTABLE COLLAMER LENS (ICL)	Misfocusing	Blurred Vision	P030016	1	Event Description: THE REPORTER INDICATED THAT A 12.6MM VICM5 12.6 IMPLANTABLE COLLAMER LENS OF -3.50 DIOPTER WAS IMPLANTED INTO THE PATIENT'S RIGHT EYE (OD) ON (B)(6) 2022. REFRACTIVE SURPRISE WAS OBSERVED. ON (B)(6) 2022 THE LENS WAS EXCHANGED FOR A TORIC MODEL AND SAME SIZE LENS. THE REPLACEMENT LENS RESOLVED THE PROBLEM. CAUSE REPORTED AS UNKNOWN. Manufacturer Narrative: H3: DEVICE EVALUATION…
https://www.accessdata.fda.gov/scripts/cdrh/cfdocs/cfMAUDE/Detail.CFM?MDRFOI__ID=14862210&pc=MTA	2023826-2022-01907	2022-05-31 04:00:00	Injury	STAAR SURGICAL COMPANY	2022-06-29 04:00:00	MTA	IMPLANTABLE COLLAMER LENS (ICL)	Misfocusing	Blurred Vision	P030016	1	Event Description: THE REPORTER INDICATED THAT A 13.2MM VICM5_13.2 IMPLANTABLE COLLAMER LENS OF -7.5 DIOPTER WAS IMPLANTED INTO THE PATIENT'S LEFT EYE (OS) ON (B)(6) 2021. REFRACTIVE SURPRISE REPORTED. REPORTEDLY RESIDUAL ASTIGMATISM WAS CORRECTED BY INCISION. THE LENS REMAINS IMPLANTED. Manufacturer Narrative: PT INFO: UNK. LENS WORK ORDER SEARCH-NO SIMILAR COMPLAINTS REPORTED FOR UNITS WITHIN T…
https://www.accessdata.fda.gov/scripts/cdrh/cfdocs/cfMAUDE/Detail.CFM?MDRFOI__ID=15697668&pc=MTA	2023826-2022-03892	2022-06-10 04:00:00	Injury	STAAR SURGICAL COMPANY	2022-10-30 04:00:00	MTA	IMPLANTABLE COLLAMER LENS (ICL)	Misfocusing	Blurred Vision	P030016	1	Event Description: THE REPORTER INDICATED THAT A 12.1MM VICM512.1 IMPLANTABLE COLLAMER LENS OF -6.0 DIOPTER WAS IMPLANTED INTO THE PATIENT'S LEFT EYE (OS) ON (B)(6) 2022. ON (B)(6) 2022, THE LENS WAS REMOVED DUE TO PRODUCT NON-CONFORMITY. REPORTEDLY, "FELLOW EYE LENS VAULTING WAS EXPLANTED DUE TO EXCESSIVE INFLAMMATION AND CELLS POST OP, PATIENT IS TRAUMATISED WITH THE WHOLE EXPERIENCE, PATIENT C…
https://www.accessdata.fda.gov/scripts/cdrh/cfdocs/cfMAUDE/Detail.CFM?MDRFOI__ID=15298835&pc=MTA	2023826-2022-02920	2022-06-11 04:00:00	Injury	STAAR SURGICAL COMPANY	2022-08-25 04:00:00	MTA	IMPLANTABLE COLLAMER LENS (ICL)	Misfocusing	Blurred Vision	P030016	1	Event Description: THE REPORTER INDICATED THAT THE SURGEON IMPLANTED A 12.6MM VICMO12.6; -10.0 DIOPTER IMPLANTABLE COLLAMER LENS INTO THE PATIENT'S RIGHT EYE (OD) ON (B)(6) 2022. THE PATIENT EXPERIENCED REFRACTIVE CHANGE OVER TIME. ON (B)(6) 2022 THE LENS WAS EXCHANGED WITH A SAME LENGTH BUT DIFFERENT POWER LENS AND THIS RESOLVED THE PROBLEM. THE CAUSE OF THE EVENT WAS REPORTED AS UNKNOWN. Manufa…
https://www.accessdata.fda.gov/scripts/cdrh/cfdocs/cfMAUDE/Detail.CFM?MDRFOI__ID=15237726&pc=MTA	2023826-2022-02810	2022-06-13 04:00:00	Malfunction	STAAR SURGICAL COMPANY	2022-08-16 04:00:00	MTA	IMPLANTABLE COLLAMER LENS (ICL)	Misfocusing	Blurred Vision	NA	1	Event Description: THE REPORTER INDICATED THAT A 12.6MM VICM12.6 IMPLANTABLE COLLAMER LENS OF 4.50 DIOPTER WAS IMPLANTED INTO THE PATIENT'S LEFT EYE (OS) ON (B)(6) 2015. THE PATIENT EXPERIENCED REFRACTIVE CHANGE OVERTIME, LENS REMAINS IMPLANTED. IF ADDITIONAL INFORMATION IS RECEIVED A SUPPLEMENTAL MEDWATCH REPORT WILL BE SUBMITTED. Manufacturer Narrative: THIS PRODUCT IS NOT MARKETED IN THE US. T…
https://www.accessdata.fda.gov/scripts/cdrh/cfdocs/cfMAUDE/Detail.CFM?MDRFOI__ID=17228874&pc=MTA	2023826-2023-02567	2022-06-17 04:00:00	Injury	STAAR SURGICAL COMPANY	2023-06-29 04:00:00	MTA	IMPLANTABLE COLLAMER LENS (ICL)	Misfocusing	Blurred Vision	P030016	1	Event Description: THE REPORTER INDICATED THAT A 12.6MM VICM5_12.6 IMPLANTABLE COLLAMER LENS OF -4.50 DIOPTER WAS IMPLANTED INTO THE PATIENT'S RIGHT EYE (OD) ON (B)(6) 2022. REFRACTIVE TREATMENT WAS PERFORMED ON (B)(6) 2022 DUE TO REFRACTIVE SURPRISE AND THE PROBLEM RESOLVED. IN THE REPORTERS OPINION THE CAUSE OF THE EVENT WAS UNKNOWN. Manufacturer Narrative: H6 - TYPE OF INVESTIGATION - LENS WOR…
https://www.accessdata.fda.gov/scripts/cdrh/cfdocs/cfMAUDE/Detail.CFM?MDRFOI__ID=15276405&pc=MTA	2023826-2022-02828	2022-06-24 04:00:00	Injury	STAAR SURGICAL COMPANY	2022-08-23 04:00:00	MTA	IMPLANTABLE COLLAMER LENS (ICL)	Misfocusing	Blurred Vision	P030016	1	Event Description: THE REPORTER INDICATED THAT A 12.6MM VICMO12.6 IMPLANTABLE COLLAMER LENS OF -6.0 DIOPTER WAS IMPLANTED IN THE PATIENT'S RIGHT EYE (OD) ON (B)(6) 2022. ON (B)(6) 2022, THE LENS WAS EXCHANGED FOR A SAME MODEL, SAME SIZE LENS DUE TO REFRACTIVE SURPRISE. THE PROBLEM WAS RESOLVED. CAUSE OF THE EVENT IS OTHER. Manufacturer Narrative: B5: CAUSE OF THE EVENT IS UNKNOWN. CLAIM# (B)(4). …
https://www.accessdata.fda.gov/scripts/cdrh/cfdocs/cfMAUDE/Detail.CFM?MDRFOI__ID=17822417&pc=MTA	2023826-2023-04280	2022-06-28 04:00:00	Injury	STAAR SURGICAL COMPANY	2023-09-26 04:00:00	MTA	IMPLANTABLE COLLAMER LENS (ICL)	Misfocusing	Blurred Vision	P030016	1	Event Description: THE REPORTER INDICATED THAT A 13.2MM VICM5_13.2 IMPLANTABLE COLLAMER LENS OF -2.50 DIOPTER WAS IMPLANTED INTO THE PATIENT'S LEFT EYE (OS) ON (B)(6) 2023. ON (B)(6) 2023 THE LENS WAS EXCHANGED FOR A DIFFERENT MODEL (TORIC LENS) AND POWER LENS. THIS EXCHANGE RESOLVED THE PROBLEM. PER REPORTER THE DEVICE DID NOT FAIL TO PERFORM AS INTENDED "PATIENT DIDN'T REACH EXPECTED VA" WAS RE…
https://www.accessdata.fda.gov/scripts/cdrh/cfdocs/cfMAUDE/Detail.CFM?MDRFOI__ID=15921202&pc=MTA	2023826-2022-04343	2022-07-06 04:00:00	Injury	STAAR SURGICAL COMPANY	2022-12-05 05:00:00	MTA	IMPLANTABLE COLLAMER LENS (ICL)	Misfocusing	Blurred Vision	P030016	1	Event Description: THE REPORTER INDICATED THE SURGEON IMPLANTED A 12.6MM VICM5_12.6 IMPLANTABLE COLLAMER LENS, -04.00 DIOPTER, INTO THE PATIENTS RIGHT EYE (OD) ON (B)(6) 2022. THE LENS WAS REMOVED ON (B)(6) 2022 DUE TO THE PATIENT EXPERIENCED A REFRACTIVE SURPRISE AND BLURRED VISION. THE LENS WAS REPLACED WITH A SHORTER LENS AND THE PROBLEM WAS RESOLVED. THE CAUSE OF THE EVENT WAS UNKNOWN. Manufa…
https://www.accessdata.fda.gov/scripts/cdrh/cfdocs/cfMAUDE/Detail.CFM?MDRFOI__ID=18101043&pc=MTA	2023826-2023-05054	2022-07-07 04:00:00	Malfunction	STAAR SURGICAL COMPANY	2023-11-09 05:00:00	MTA	IMPLANTABLE COLLAMER LENS (ICL)	Misfocusing	Blurred Vision	P030016	1	Event Description: THE REPORTER INDICATED THAT A 12.6MM VICM5_12.6 IMPLANTABLE COLLAMER LENS OF -8.50 DIOPTER WAS IMPLANTED INTO THE PATIENT'S RIGHT EYE (OD) ON (B)(6) 2022. THE PATIENT EXPERIENCED REFRACTIVE SURPRISE, SLIGHTLY MORE HYPEROPIC THAN PLANNED, UDVA IS 1.0. PATIENT IS DISSATISFIED WITH NEAR VISION AND COMPUTER DISTANCE, LENS REMAINS IMPLANTED. IF ADDITIONAL INFORMATION IS RECEIVED A S…
https://www.accessdata.fda.gov/scripts/cdrh/cfdocs/cfMAUDE/Detail.CFM?MDRFOI__ID=15160364&pc=MTA	2023826-2022-02614	2022-07-17 04:00:00	Injury	STAAR SURGICAL COMPANY	2022-08-03 04:00:00	MTA	IMPLANTABLE COLLAMER LENS (ICL)	Misfocusing	Blurred Vision	P030016	1	Event Description: THE REPORTER INDICATED THAT THE SURGEON IMPLANTED A 12.6MM VICMO12.6; -13.5 DIOPTER IMPLANTABLE COLLAMER LENS INTO THE PATIENT'S LEFT EYE (OS) ON (B)(6) 2022. THE PATIENT HAD EXPERIENCED REFRACTIVE SURPRISE. ON (B)(6) 2022 THE LENS WAS EXCHANGED WITH A SAME MODEL/LENGTH LENS BUT DIFFERENT POWER. IT WAS ADDITIONALLY NOTED AFTER INITIAL IMPLANTATION OF POSTOPERATIVE VISION; IT CO…
https://www.accessdata.fda.gov/scripts/cdrh/cfdocs/cfMAUDE/Detail.CFM?MDRFOI__ID=15882900&pc=MTA	2023826-2022-04253	2022-07-17 04:00:00	Injury	STAAR SURGICAL COMPANY	2022-11-29 05:00:00	MTA	IMPLANTABLE COLLAMER LENS (ICL)	Misfocusing	Blurred Vision	P030016	1	Event Description: THE REPORTER INDICATED THAT THE SURGEON IMPLANTED A 12.6MM VICMO12.6; -14.5 DIOPTER IMPLANTABLE COLLAMER LENS INTO THE PATIENT'S LEFT EYE (OS) ON (B)(6) 2022. THE PATIENT EXPERIENCED REFRACTIVE SURPRISE. ON (B)(6) 2022 THE LENS WAS EXCHANGED WITH A SAME LENGTH BUT DIFFERENT MODEL/POWER LENS AND THIS RESOLVED THE PROBLEM. Manufacturer Narrative: H3: DEVICE EVALUATION - LENS WAS …
https://www.accessdata.fda.gov/scripts/cdrh/cfdocs/cfMAUDE/Detail.CFM?MDRFOI__ID=15712752&pc=MTA	2023826-2022-03897	2022-07-24 04:00:00	Injury	STAAR SURGICAL COMPANY	2022-11-01 04:00:00	MTA	IMPLANTABLE COLLAMER LENS (ICL)	Misfocusing	Blurred Vision	P030016	1	Event Description: THE REPORTER INDICATED THAT A 12.6MM VICMO12.6 IMPLANTABLE COLLAMER LENS OF A -7.5 DIOPTER WAS IMPLANTED IN THE PATIENT'S RIGHT EYE (OD) ON (B)(6) 2022. ON (B)(6) 2022, THE LENS WAS EXCHANGED FOR A TORIC LENS DUE TO REFRACTIVE SURPRISE. THE PROBLEM WAS RESOLVED. CAUSE OF THE EVENT IS UNKNOWN. Manufacturer Narrative: (B)(4). CLAIM# (B)(4). Manufacturer Narrative: H3: DEVICE EVAL…
https://www.accessdata.fda.gov/scripts/cdrh/cfdocs/cfMAUDE/Detail.CFM?MDRFOI__ID=15712753&pc=MTA	2023826-2022-03898	2022-07-24 04:00:00	Injury	STAAR SURGICAL COMPANY	2022-11-01 04:00:00	MTA	IMPLANTABLE COLLAMER LENS (ICL)	Misfocusing	Blurred Vision	P030016	1	Event Description: THE REPORTER INDICATED THAT A 12.6MM VICMO12.6 IMPLANTABLE COLLAMER LENS OF A -8.0 DIOPTER WAS IMPLANTED IN THE PATIENT'S LEFT EYE (OS) ON (B)(6) 2022. ON (B)(6) 2022, THE LENS WAS EXCHANGED FOR A TORIC LENS DUE TO REFRACTIVE SURPRISE. THE PROBLEM WAS RESOLVED. CAUSE OF THE EVENT IS UNKNOWN. Manufacturer Narrative: NO SIMILAR COMPLAINTS WITHIN ASSOCIATED LOTS WERE FOUND. (B)(4)…
https://www.accessdata.fda.gov/scripts/cdrh/cfdocs/cfMAUDE/Detail.CFM?MDRFOI__ID=16728673&pc=MTA	2023826-2023-01334	2022-08-07 04:00:00	Injury	STAAR SURGICAL COMPANY	2023-04-12 04:00:00	MTA	IMPLANTABLE COLLAMER LENS (ICL)	Misfocusing	Blurred Vision	P030016	1	Event Description: THE REPORTER INDICATED THAT A 13.2MM VICMO13.2 IMPLANTABLE COLLAMER LENS OF -7.0 DIOPTER WAS IMPLANTED IN THE PATIENT'S LEFT EYE (OS) ON (B)(6) 2022. ON (B)(6) 2022, THE LENS WAS EXCHANGED FOR DUE TO REFRACTIVE CHANGE OVERTIME. THE PROBLEM WAS RESOLVED. CAUSE OF THE EVENT IS UNKNOWN. Manufacturer Narrative: H6: WORK ORDER SEARCH: NO SIMILAR COMPLAINTS WITHIN ASSOCIATED LOTS WER…
https://www.accessdata.fda.gov/scripts/cdrh/cfdocs/cfMAUDE/Detail.CFM?MDRFOI__ID=15712749&pc=MTA	2023826-2022-03896	2022-08-22 04:00:00	Injury	STAAR SURGICAL COMPANY	2022-11-01 04:00:00	MTA	IMPLANTABLE COLLAMER LENS (ICL)	Misfocusing	Blurred Vision	P030016	1	Event Description: THE REPORTER INDICATED THAT A 12.1MM VICMO12.1 IMPLANTABLE COLLAMER LENS OF -5.5 DIOPTER WAS IMPLANTED INTO THE PATIENT'S LEFT EYE (OS) ON (B)(6) 2022. ON (B)(6) 2022, THE LENS WAS REMOVED DUE TO TRANSIENT LOSS OF BCVA. IN A SUBSEQUENT SURGERY LATER THAT DAY, A REPLACEMENT LENS WAS IMPLANTED AND THE PROBLEM WAS RESOLVED. CAUSE REPORTED AS UNKNOWN. Manufacturer Narrative: D4: CO…
https://www.accessdata.fda.gov/scripts/cdrh/cfdocs/cfMAUDE/Detail.CFM?MDRFOI__ID=15849481&pc=MTA	2023826-2022-04262	2022-09-01 04:00:00	Injury	STAAR SURGICAL COMPANY	2022-11-22 05:00:00	MTA	IMPLANTABLE COLLAMER LENS (ICL)	Misfocusing	Blurred Vision	P030016	1	Event Description: THE REPORTER INDICATED THAT A 13.2MM VICM5 13.2 IMPLANTABLE COLLAMER LENS OF -14.0 DIOPTER WAS IMPLANTED INTO THE PATIENTS RIGHT EYE (OD) ON (B)(6) 2022. REFRACTIVE SURPRISE WAS OBSERVED. THE LENS REMAINS IMPLANTED. NO FURTHER INFORMATION HAS BEEN PROVIDED. ATTEMPTS TO OBTAIN ADDITIONAL INFORMATION HAVE NOT BEEN SUCCESSFUL. IF ADDITIONAL INFORMATION IS RECEIVED A SUPPLEMENTAL M…
https://www.accessdata.fda.gov/scripts/cdrh/cfdocs/cfMAUDE/Detail.CFM?MDRFOI__ID=15937239&pc=MTA	2023826-2022-04285	2022-09-07 04:00:00	Injury	STAAR SURGICAL COMPANY	2022-12-07 05:00:00	MTA	IMPLANTABLE COLLAMER LENS (ICL)	Misfocusing	Blurred Vision	P030016	1	Event Description: THE REPORTER INDICATED THAT A 12.6MM VICM5 12.6 OF -8.50 DIOPTER WAS IMPLANTED INTO THE PATIENT'S RIGHT EYE (OD) ON (B)(6) 2022. LENS TEAR/BREAK DURING INJECTION/DELIVERY INTO THE EYE WAS REPORTED AND REFRACTIVE SURPRISE. ON (B)(6) 2022 THE LENS WAS EXCHANGED FOR A SAME MODEL AND SIZE LENS BUT A DIFFERENT DIOPTER. THE REPLACEMENT LENS RESOLVED THE PROBLEM. Manufacturer Narrativ…
https://www.accessdata.fda.gov/scripts/cdrh/cfdocs/cfMAUDE/Detail.CFM?MDRFOI__ID=15577434&pc=MTA	2023826-2022-03585	2022-09-12 04:00:00	Injury	STAAR SURGICAL COMPANY	2022-10-11 04:00:00	MTA	IMPLANTABLE COLLAMER LENS (ICL)	Misfocusing	Blurred Vision	P030016	1	Event Description: THE REPORTER INDICATED THAT THE SURGEON IMPLANTED A 13.2MM VICMO13.2; -7.5 DIOPTER IMPLANTABLE COLLAMER LENS INTO THE PATIENT'S LEFT EYE (OS) ON (B)(6) 2022. THE SURGEON REPORTS REFRACTIVE SURPRISE DURING THE POSTOPERATIVE EXAMINATION WITH THE PATIENT. ON (B)(6) 2022 THE SURGEON EXCHANGED THE LENS WITH A SAME LENGTH/MODEL/POWER LENS AND THIS RESOLVED THE PROBLEM. THE SURGEON SU…
https://www.accessdata.fda.gov/scripts/cdrh/cfdocs/cfMAUDE/Detail.CFM?MDRFOI__ID=16301418&pc=MTA	2023826-2023-00379	2022-09-13 04:00:00	Injury	STAAR SURGICAL COMPANY	2023-02-04 05:00:00	MTA	IMPLANTABLE COLLAMER LENS (ICL)	Misfocusing	Blurred Vision	P030016	1	Event Description: THE REPORTER INDICATED THAT A 12.6MM VICMO12.6 IMPLANTABLE COLLAMER LENS OF -12.5 DIOPTER WAS IMPLANTED IN THE PATIENT'S LEFT EYE (OS) ON (B)(6) 2022. ON (B)(6) 2022, THE LENS WAS EXCHANGED FOR A TORIC MODEL, SAME SIZE LENS DUE TO REFRACTIVE SURPRISE. THE PROBLEM WAS RESOLVED. CAUSE OF THE EVENT IS UNKNOWN. Manufacturer Narrative: ADDITIONAL INFORMATION: D9: LENS RETURNED 20-FE…
https://www.accessdata.fda.gov/scripts/cdrh/cfdocs/cfMAUDE/Detail.CFM?MDRFOI__ID=16154822&pc=MTA	2023826-2023-00129	2022-09-15 04:00:00	Injury	STAAR SURGICAL COMPANY	2023-01-12 05:00:00	MTA	IMPLANTABLE COLLAMER LENS (ICL)	Misfocusing	Blurred Vision	P030016	1	Event Description: THE REPORTER INDICATED THAT A 12.1MM VICM5 12.1 IMPLANTABLE COLLAMER LENS OF -10.00 DIOPTER WAS IMPLANTED INTO THE PATIENT'S LEFT EYE (OS) ON (B)(6) 2021. REFRACTIVE SURPRISE WAS OBSERVED. ON (B)(6) 2022, THE LENS WAS EXCHANGED FOR A SAME MODE AND SIZE BUT DIFFERENT DIOPTER LENS. THE REPLACEMENT LENS RESOLVED THE PROBLEM. CAUSE REPORTED AS USER ERROR. DEVICE DID NOT FAIL TO PER…
https://www.accessdata.fda.gov/scripts/cdrh/cfdocs/cfMAUDE/Detail.CFM?MDRFOI__ID=16154821&pc=MTA	2023826-2023-00131	2022-09-29 04:00:00	Injury	STAAR SURGICAL COMPANY	2023-01-12 05:00:00	MTA	IMPLANTABLE COLLAMER LENS (ICL)	Misfocusing	Blurred Vision	P030016	1	Event Description: THE REPORTER INDICATED THAT A 12.1MM VICM5 12.1 IMPLANTABLE COLLAMER LENS OF -7.00 DIOPTER WAS IMPLANTED INTO THE PATIENT'S LEFT EYE (OS) ON (B)(6) 2022 . REFRACTIVE SURPRISE WAS OBSERVED. ON (B)(6) 2022, THE LENS WAS EXCHANGED FOR A SAME MODEL AND SIZE BUT DIFFERENT DIOPTER LENS. THE REPLACEMENT LENS RESOLVED THE PROBLEM. CAUSE REPORTED AS USER ERROR. DEVICE DID NOT FAIL TO PE…
https://www.accessdata.fda.gov/scripts/cdrh/cfdocs/cfMAUDE/Detail.CFM?MDRFOI__ID=16414710&pc=MTA	2023826-2023-00520	2022-10-08 04:00:00	Injury	STAAR SURGICAL COMPANY	2023-02-21 05:00:00	MTA	IMPLANTABLE COLLAMER LENS (ICL)	Misfocusing	Blurred Vision	P030016	1	Event Description: THE REPORTER INDICATED THAT A 12.1MM VICM512.1 IMPLANTABLE COLLAMER LENS OF A -6.5 DIOPTER WAS IMPLANTED INTO THE PATIENT'S LEFT EYE (OS) ON (B)(6) 2022. ON (B)(6) 2023, THE LENS WAS REPLACED FOR A TORIC LENS DUE TO REFRACTIVE SURPRISE. THE PROBLEM WAS RESOLVED. THE CAUSE OF THE EVENT IS UNKNOWN. REPORTEDLY, "POSTOPERATIVELY, THE PATIENT HAS DIFFICULTY OPENING HER EYES EVEN AFT…
https://www.accessdata.fda.gov/scripts/cdrh/cfdocs/cfMAUDE/Detail.CFM?MDRFOI__ID=16828266&pc=MTA	2023826-2023-01532	2022-10-08 04:00:00	Injury	STAAR SURGICAL COMPANY	2023-04-27 04:00:00	MTA	IMPLANTABLE COLLAMER LENS (ICL)	Misfocusing	Blurred Vision	P030016	1	Event Description: THE REPORTER INDICATED THAT A 13.2MM VICMO13.2 IMPLANTABLE COLLAMER LENS OF -7.0 DIOPTER WAS IMPLANTED INTO THE PATIENT'S LEFT EYE (OS) ON (B)(6) 2022. THE LENS WAS LATER EXCHANGED FOR A TORIC LENS OF THE SAME LENGTH AND THE PROBLEM RESOLVED. CAUSE OF EVENT WAS UNKNOWN. Manufacturer Narrative: H6 - TYPE OF INVESTIGATION - LENS WORK ORDER SEARCH: NO SIMILAR COMPLAINT TYPE EVENTS…
https://www.accessdata.fda.gov/scripts/cdrh/cfdocs/cfMAUDE/Detail.CFM?MDRFOI__ID=17338886&pc=MTA	2023826-2023-02982	2022-10-12 04:00:00	Injury	STAAR SURGICAL COMPANY	2023-07-17 04:00:00	MTA	IMPLANTABLE COLLAMER LENS (ICL)	Misfocusing	Blurred Vision	P030016	1	Event Description: THE REPORTER INDICATED THAT THE SURGEON IMPLANTED A 12.1MM VICM5_12.1; -09.00 DIOPTER IMPLANTABLE COLLAMER LENS INTO THE PATIENT'S RIGHT EYE (OD) ON (B)(6) 2022. IT WAS REPORTED THE PATIENT HAD VISUAL ACUITY DISSATISFACTION. ON (B)(6) 2023 THE LENS WAS EXCHANGED WITH A SAME LENGTH BUT DIFFERENT MODEL/POWER LENS AND THIS RESOLVED THE PROBLEM. Manufacturer Narrative: H6 - TYPE OF…
https://www.accessdata.fda.gov/scripts/cdrh/cfdocs/cfMAUDE/Detail.CFM?MDRFOI__ID=16344588&pc=MTA	2023826-2023-00474	2022-11-09 05:00:00	Injury	STAAR SURGICAL COMPANY	2023-02-09 05:00:00	MTA	IMPLANTABLE COLLAMER LENS (ICL)	Misfocusing	Blurred Vision	P030016	1	Event Description: THE REPORTER INDICATED THAT A 12.6MM VICM512.6 IMPLANTABLE COLLAMER LENS OF A -9.0 DIOPTER WAS IMPLANTED INTO THE PATIENT'S LEFT EYE (OS) ON (B)(6) 2022. ON (B)(6) 2022, THE LENS WAS EXCHANGED FOR A REPLACEMENT LENS DUE TO REFRACTIVE SURPRISE. THE PROBLEM WAS RESOLVED. THE CAUSE OF THE EVENT IS UNKNOWN. Manufacturer Narrative: DEVICE EVALUATION: H3 - TYPE OF INVESTIGATION CODE:…
https://www.accessdata.fda.gov/scripts/cdrh/cfdocs/cfMAUDE/Detail.CFM?MDRFOI__ID=16356403&pc=MTA	2023826-2023-00475	2022-11-09 05:00:00	Injury	STAAR SURGICAL COMPANY	2023-02-10 05:00:00	MTA	IMPLANTABLE COLLAMER LENS (ICL)	Misfocusing	Blurred Vision	P030016	1	Event Description: THE REPORTER INDICATED THAT A 12.6MM VICM512.6 IMPLANTABLE COLLAMER LENS OF A -8.5 DIOPTER WAS IMPLANTED INTO THE PATIENT'S RIGHT EYE (OD) ON (B)(6) 2022. ON (B)(6) 2022, THE LENS WAS EXCHANGED FOR A REPLACEMENT LENS DUE TO REFRACTIVE SURPRISE. THE PROBLEM WAS RESOLVED. THE CAUSE OF THE EVENT IS UNKNOWN. Manufacturer Narrative: DEVICE EVALUATION: H3 - TYPE OF INVESTIGATION CODE…
https://www.accessdata.fda.gov/scripts/cdrh/cfdocs/cfMAUDE/Detail.CFM?MDRFOI__ID=16464988&pc=MTA	2023826-2023-00719	2022-12-02 05:00:00	Injury	STAAR SURGICAL COMPANY	2023-03-01 05:00:00	MTA	IMPLANTABLE COLLAMER LENS (ICL)	Misfocusing	Blurred Vision	P030016	1	Event Description: THE REPORTER INDICATED THAT A 12.6MM VICMO12.6 IMPLANTABLE COLLAMER LENS OF -3.5 DIOPTER WAS IMPLANTED IN THE PATIENT'S RIGHT EYE (OD) ON (B)(6) 2022. ON (B)(6) 2022, THE LENS WAS EXCHANGED FOR A SAME SIZE LENS DUE TO REFRACTIVE SURPRISE. THE PROBLEM WAS RESOLVED. CAUSE OF THE EVENT IS UNKNOWN. Manufacturer Narrative: H3 - DEVICE EVALUATION: THE LENS WAS RETURNED DRY WITH RESID…
https://www.accessdata.fda.gov/scripts/cdrh/cfdocs/cfMAUDE/Detail.CFM?MDRFOI__ID=16150999&pc=MTA	2023826-2023-00139	2022-12-08 05:00:00	Injury	STAAR SURGICAL COMPANY	2023-01-12 05:00:00	MTA	IMPLANTABLE COLLAMER LENS (ICL)	Misfocusing	Blurred Vision	P030016	1	Event Description: THE REPORTER INDICATED THAT THE SURGEON IMPLANTED A 12.6MM VICM5_12.6; -3.50 DIOPTER IMPLANTABLE COLLAMER LENS INTO THE PATIENT'S LEFT EYE (OS) ON (B)(6) 2022. THE PATIENT EXPERIENCED REFRACTIVE SURPRISE. ON (B)(6) 2022 THE LENS WAS EXCHANGED WITH A SAME LENGTH BUT DIFFERENT POWER LENS. THIS RESOLVED THE PROBLEM. THE CAUSE OF THE EVENT WAS REPORTED AS UNKNOWN. Manufacturer Narr…
https://www.accessdata.fda.gov/scripts/cdrh/cfdocs/cfMAUDE/Detail.CFM?MDRFOI__ID=17119689&pc=MTA	2023826-2023-02165	2022-12-25 05:00:00	Malfunction	STAAR SURGICAL COMPANY	2023-06-13 04:00:00	MTA	IMPLANTABLE COLLAMER LENS (ICL)	Misfocusing	Blurred Vision	P030016	1	Event Description: THE REPORTER INDICATED THAT THE SURGEON IMPLANTED A 12.6MM VICM6 12.6, -11.0 DIOPTER, IMPLANTABLE COLLAMER LENS INTO THE PATIENT'S RIGHT EYE (OD) ON 27/NOV/2023. REFRACTIVE SURPRISE WAS OBSERVED. LENS REMAINS IMPLANTED. THE CAUSE OF THE EVENT WAS REPORTED AS UNKNOWN. REPORTEDLY, LENS MAYBE EXCHANGED. Manufacturer Narrative: A4 - UNK A5 - UNK A6 - UNK H6 - WORK ORDER SEARCH: NO …
https://www.accessdata.fda.gov/scripts/cdrh/cfdocs/cfMAUDE/Detail.CFM?MDRFOI__ID=17119700&pc=MTA	2023826-2023-02166	2022-12-25 05:00:00	Malfunction	STAAR SURGICAL COMPANY	2023-06-13 04:00:00	MTA	IMPLANTABLE COLLAMER LENS (ICL)	Misfocusing	Blurred Vision	P030016	1	Event Description: THE REPORTER INDICATED THAT THE SURGEON IMPLANTED A 12.6MM VICM6 12.6, -08.50 DIOPTER, IMPLANTABLE COLLAMER LENS INTO THE PATIENT'S LEFT EYE (OS) ON (B)(6) 2023. REFRACTIVE SURPRISE WAS OBSERVED. LENS REMAINS IMPLANTED. THE CAUSE OF THE EVENT WAS REPORTED AS UNKNOWN. REPORTEDLY, LENS MAYBE EXCHANGED. Manufacturer Narrative: H6 - WORK ORDER SEARCH: NO SIMILAR COMPLAINT TYPE EVEN…
https://www.accessdata.fda.gov/scripts/cdrh/cfdocs/cfMAUDE/Detail.CFM?MDRFOI__ID=16250313&pc=MTA	2023826-2023-00320	2023-01-04 05:00:00	Malfunction	STAAR SURGICAL COMPANY	2023-01-26 05:00:00	MTA	IMPLANTABLE COLLAMER LENS (ICL)	Misfocusing	Blurred Vision	P030016	1	Event Description: THE REPORTER INDICATED THAT THE SURGEON IMPLANTED A 13.2MM VICM6_13.2; -9.50 DIOPTER IMPLANTABLE COLLAMER LENS INTO THE PATIENT'S LEFT EYE (OS) ON (B)(6) 2022. THE PATIENT EXPERIENCED REFRACTIVE SURPRISE. IT WAS ADDITIONALLY NOTED "PATIENT HAPPY WITH DISTANCE VISION BUT DISSATISFIED WITH INTERMEDIATE AND NEAR VISION". LENS REMAINS IMPLANTED. THE PROBLEM IS NOT RESOLVED. CAUSE O…
https://www.accessdata.fda.gov/scripts/cdrh/cfdocs/cfMAUDE/Detail.CFM?MDRFOI__ID=16250339&pc=MTA	2023826-2023-00319	2023-01-04 05:00:00	Malfunction	STAAR SURGICAL COMPANY	2023-01-26 05:00:00	MTA	IMPLANTABLE COLLAMER LENS (ICL)	Misfocusing	Blurred Vision	P030016	1	Event Description: THE REPORTER INDICATED THAT THE SURGEON IMPLANTED A 13.2MM VICM6_13.2; -10.00 DIOPTER IMPLANTABLE COLLAMER LENS INTO THE PATIENT'S RIGHT EYE (OD) ON (B)(6) 2022. THE PATIENT EXPERIENCED REFRACTIVE SURPRISE; IT WAS ADDITIONALLY NOTED "PATIENT HAPPY WITH DISTANCE VISION BUT DISSATISFIED WITH INTERMEDIATE AND NEAR VISION. LENS REMAINS IMPLANTED. THE PROBLEM IS NOT RESOLVED. THE CA…
https://www.accessdata.fda.gov/scripts/cdrh/cfdocs/cfMAUDE/Detail.CFM?MDRFOI__ID=17121541&pc=MTA	2023826-2023-02331	2023-01-10 05:00:00	Injury	STAAR SURGICAL COMPANY	2023-06-13 04:00:00	MTA	IMPLANTABLE COLLAMER LENS (ICL)	Misfocusing	Blurred Vision	P030016	1	Event Description: THE REPORTER INDICATED THAT THE SURGEON IMPLANTED A 12.6MM VICMO12.6; -13.5 DIOPTER IMPLANTABLE COLLAMER LENS INTO THE PATIENT'S LEFT EYE (OS) (B)(6) 2023. THE PATIENT EXPERIENCED BLURRED VISION WITH VISION QUALITY ISSUES. ON (B)(6) 2023 THE LENS WAS EXCHANGED WITH A SAME LENGTH BUT DIFFERENT MODEL/POWER LENS AND THIS RESOLVED THE PROBLEM. THE CAUSE OF THE EVENT WAS REPORTED AS…
https://www.accessdata.fda.gov/scripts/cdrh/cfdocs/cfMAUDE/Detail.CFM?MDRFOI__ID=16281081&pc=MTA	2023826-2023-00403	2023-01-15 05:00:00	Injury	STAAR SURGICAL COMPANY	2023-02-01 05:00:00	MTA	IMPLANTABLE COLLAMER LENS (ICL)	Misfocusing	Blurred Vision	P030016	1	Event Description: THE REPORTER INDICATED THAT THE SURGEON IMPLANTED A 13.2MM VICMO13.2; -5.5 DIOPTER IMPLANTABLE COLLAMER LENS INTO THE PATIENT'S LEFT EYE (OS) ON (B)(6) 2022. THE SURGEON REPORTS TRANSIENT LOSS OF BCVA. ON (B)(6) 2023 THE LENS WAS EXCHANGED WITH A SHORTER LENGTH LENS AND DIFFERENT MODEL LENS. THIS RESOLVED THE PROBLEM. THE CAUSE OF THE EVENT WAS REPORTED AS "OTHER" AND NOTED; "D…
https://www.accessdata.fda.gov/scripts/cdrh/cfdocs/cfMAUDE/Detail.CFM?MDRFOI__ID=16281082&pc=MTA	2023826-2023-00395	2023-01-15 05:00:00	Injury	STAAR SURGICAL COMPANY	2023-02-01 05:00:00	MTA	IMPLANTABLE COLLAMER LENS (ICL)	Misfocusing	Blurred Vision	P030016	1	Event Description: THE REPORTER INDICATED THAT THE SURGEON IMPLANTED A 13.2MM VICMO13.2; -6.0 DIOPTER IMPLANTABLE COLLAMER LENS INTO THE PATIENT'S RIGHT EYE (OD) ON (B)(6) 2022. THE SURGEON REPORTS TRANSIENT LOSS OF BCVA. ON (B)(6) 2023 THE LENS WAS EXCHANGED WITH A SHORTER LENGTH LENS AND DIFFERENT MODEL LENS. THIS RESOLVED THE PROBLEM. THE CAUSE OF THE EVENT WAS REPORTED AS "OTHER" AND NOTED; "…
https://www.accessdata.fda.gov/scripts/cdrh/cfdocs/cfMAUDE/Detail.CFM?MDRFOI__ID=16678113&pc=MTA	2023826-2023-01214	2023-01-24 05:00:00	Injury	STAAR SURGICAL COMPANY	2023-04-04 04:00:00	MTA	IMPLANTABLE COLLAMER LENS (ICL)	Misfocusing	Blurred Vision	P030016	1	Event Description: THE REPORTER INDICATED THAT THE SURGEON IMPLANTED A 12.6MM VICM5_12.6; -2.75 DIOPTER IMPLANTABLE COLLAMER LENS INTO THE PATIENT'S LEFT EYE (OS) ON (B)(6) 2023. THE PATIENT EXPERIENCED REFRACTIVE SURPRISE. LENS REMAINS IMPLANTED. THE CAUSE OF THE EVENT WAS REPORTED AS UNKNOWN. IF ADDITIONAL INFORMATION IS RECEIVED A SUPPLEMENTAL MEDWATCH REPORT WILL BE SUBMITTED. Manufacturer Na…
https://www.accessdata.fda.gov/scripts/cdrh/cfdocs/cfMAUDE/Detail.CFM?MDRFOI__ID=16892521&pc=MTA	2023826-2023-01748	2023-02-07 05:00:00	Injury	STAAR SURGICAL COMPANY	2023-05-08 04:00:00	MTA	IMPLANTABLE COLLAMER LENS (ICL)	Misfocusing	Blurred Vision	P030016	1	Event Description: THE REPORTER INDICATED THAT A 12.6MM VICMO12.6 IMPLANTABLE COLLAMER LENS OF -5.00 DIOPTER WAS IMPLANTED INTO THE PATIENT'S RIGHT EYE (OD) ON (B)(6) 2022. ON (B)(6) 2023 THE LENS WAS EXCHANGED FOR A TORIC LENS DUE TO REFRACTIVE SURPRISE. THE EXCHANGE RESOLVED THE PROBLEM. CAUSE OF EVENT WAS UNKNOWN. Manufacturer Narrative: H6 - TYPE OF INVESTIGATION - LENS WORK ORDER SEARCH: NO …
https://www.accessdata.fda.gov/scripts/cdrh/cfdocs/cfMAUDE/Detail.CFM?MDRFOI__ID=17131352&pc=MTA	2023826-2023-02389	2023-02-09 05:00:00	Injury	STAAR SURGICAL COMPANY	2023-06-14 04:00:00	MTA	IMPLANTABLE COLLAMER LENS (ICL)	Misfocusing	Blurred Vision	P030016	1	Event Description: THE REPORTER INDICATED THAT THE SURGEON IMPLANTED A 13.2MM VICM5_13.2; -7.50 DIOPTER IMPLANTABLE COLLAMER LENS INTO THE PATIENT'S RIGHT EYE (OD) ON (B)(6) 2023. THE PATIENT EXPERIENCED REFRACTIVE SURPRISE. THE SURGEON PERFORMED REFRACTIVE TREATMENT (LASIK/PRK/ETC). THIS RESOLVED THE PROBLEM. IT WAS ADDITIONALLY NOTED "ALL IS FINE AND PATIENT IS HAPPY, LASER TOUCH UP TREATMENT O…
https://www.accessdata.fda.gov/scripts/cdrh/cfdocs/cfMAUDE/Detail.CFM?MDRFOI__ID=17066600&pc=MTA	2023826-2023-02225	2023-02-10 05:00:00	Injury	STAAR SURGICAL COMPANY	2023-06-05 04:00:00	MTA	IMPLANTABLE COLLAMER LENS (ICL)	Misfocusing	Blurred Vision	P030016	1	Event Description: THE REPORTER INDICATED THAT THE SURGEON IMPLANTED A 12.1MM VICM5_12.1; -8.50 DIOPTER IMPLANTABLE COLLAMER LENS INTO THE PATIENT'S RIGHT EYE (OD) ON (B)(6) 2023. THE PATIENT EXPERIENCED REFRACTIVE SURPRISE. ON (B)(6) 2023 THE LENS WAS EXPLANTED. ON THIS SAME DATE IN A SEPARATE SURGERY A REPLACEMENT LENS OF THE SAME LENGTH, BUT DIFFERENT MODEL/POWER WAS IMPLANTED AND THIS RESOLVE…
https://www.accessdata.fda.gov/scripts/cdrh/cfdocs/cfMAUDE/Detail.CFM?MDRFOI__ID=16792960&pc=MTA	2023826-2023-01479	2023-02-11 05:00:00	Injury	STAAR SURGICAL COMPANY	2023-04-23 04:00:00	MTA	IMPLANTABLE COLLAMER LENS (ICL)	Misfocusing	Blurred Vision	P030016	1	Event Description: THE REPORTER INDICATED THAT A 13.2MM VICMO13.2 IMPLANTABLE COLLAMER LENS OF -11.5 DIOPTER WAS IMPLANTED IN THE PATIENT'S RIGHT EYE (OD) ON (B)(6) 2023. ON (B)(6) 2023, THE LENS WAS EXCHANGED DUE TO REFRACTIVE SURPRISE. THE PROBLEM WAS RESOLVED. CAUSE OF THE EVENT IS UNKNOWN. REPORTEDLY, "BEFORE REPLACING THE FIRST LENS, THE DOCTOR PERFORMED LENS ALIGNMENT AND ROTATION IN THE EY…
https://www.accessdata.fda.gov/scripts/cdrh/cfdocs/cfMAUDE/Detail.CFM?MDRFOI__ID=16678778&pc=MTA	2023826-2023-01178	2023-02-14 05:00:00	Injury	STAAR SURGICAL COMPANY	2023-04-04 04:00:00	MTA	IMPLANTABLE COLLAMER LENS (ICL)	Misfocusing	Blurred Vision	P030016	1	Event Description: THE REPORTER INDICATED THAT A 12.6MM VICM512.6 IMPLANTABLE COLLAMER LENS OF A -5.50 DIOPTER WAS IMPLANTED INTO THE PATIENT'S RIGHT EYE (OD) ON (B)(6) 2023. ON (B)(6) 2023, THE LENS WAS REMOVED DUE TO REFRACTIVE SURPRISE. THE PROBLEM WAS RESOLVED. Manufacturer Narrative: ADDITIONAL INFORMATION: H6 - TYPE OF INVESTIGATION 3331 - DEVICE HISTORY RECORD (DHR) REVIEW: BASED ON THE RE…
https://www.accessdata.fda.gov/scripts/cdrh/cfdocs/cfMAUDE/Detail.CFM?MDRFOI__ID=17696360&pc=MTA	2023826-2023-03777	2023-02-14 05:00:00	Injury	STAAR SURGICAL COMPANY	2023-09-07 04:00:00	MTA	IMPLANTABLE COLLAMER LENS (ICL)	Misfocusing	Blurred Vision	P030016	1	Event Description: THE REPORTER INDICATED THAT A 13.2MM VICMO13.2 IMPLANTABLE COLLAMER LENS OF -5.0 DIOPTER WAS IMPLANTED INTO THE PATIENT'S LEFT EYE (OS) ON (B)(6) 2023. ON (B)(6) 2023 THE LENS WAS EXCHANGED FOR TORIC LENS OF DIFFERENT POWER DUE TO REFRACTIVE SURPRISE. THE EXCHANGE RESOLVED THE PROBLEM. CAUSE OF EVENT WAS UNKNOWN. Manufacturer Narrative: H3: DEVICE EVALUATION: LENS WAS RETURNED …
https://www.accessdata.fda.gov/scripts/cdrh/cfdocs/cfMAUDE/Detail.CFM?MDRFOI__ID=17971404&pc=MTA	2023826-2023-04572	2023-02-17 05:00:00	Injury	STAAR SURGICAL COMPANY	2023-10-19 04:00:00	MTA	IMPLANTABLE COLLAMER LENS (ICL)	Misfocusing	Blurred Vision	P030016	1	Event Description: THE REPORTER INDICATED THAT A 13.2MM VICM513.2 IMPLANTABLE COLLAMER LENS OF -11.0 DIOPTER WAS IMPLANTED IN THE PATIENT'S RIGHT EYE (OD) ON (B)(6) 2023. ON (B)(6) 2023, THE LENS WAS REMOVED DUE TO REFRACTIVE SUPRISE. ON (B)(6) 2023, A REPLACEMENT LENS WAS IMPLANTED AND THE PROBLEM WAS RESOLVED. CAUSE OF THE EVENT IS OTHER. Manufacturer Narrative: A4-A6:UNK. H6: WORK ORDER SEARCH…
https://www.accessdata.fda.gov/scripts/cdrh/cfdocs/cfMAUDE/Detail.CFM?MDRFOI__ID=17992929&pc=MTA	2023826-2023-04742	2023-02-18 05:00:00	Injury	STAAR SURGICAL COMPANY	2023-10-23 04:00:00	MTA	IMPLANTABLE COLLAMER LENS (ICL)	Misfocusing	Blurred Vision	P030016	1	Event Description: THE REPORTER INDICATED THAT A 12.6MM, VICM5_12.6, -5.0 DIOPTER, IMPLANTABLE COLLAMER LENS WAS IMPLANTED INTO THE PATIENTS RIGHT EYE (OD) ON (B)(6) 2023. ON (B)(6) 2023 THE LENS WAS EXCHANGED FOR A DIFFERENT DIOPTER LENS AND THE PROBLEM RESOLVED. CAUSE OF EVENT WAS UNKNOWN. Manufacturer Narrative: TYPE OF INVESTIGATION - LENS WORK ORDER SEARCH: NO SIMILAR COMPLAINT TYPE EVENTS R…
https://www.accessdata.fda.gov/scripts/cdrh/cfdocs/cfMAUDE/Detail.CFM?MDRFOI__ID=16748688&pc=MTA	2023826-2023-01354	2023-03-01 05:00:00	Injury	STAAR SURGICAL COMPANY	2023-04-16 04:00:00	MTA	IMPLANTABLE COLLAMER LENS (ICL)	Misfocusing	Blurred Vision	P030016	1	Event Description: THE REPORTER INDICATED THAT A 13.2MM VICMO13.2 IMPLANTABLE COLLAMER LENS OF -10.00 DIOPTER WAS IMPLANTED INTO THE PATIENT'S LEFT EYE (OS) ON (B)(6) 2022. ON (B)(6) 2023THE LENS WAS EXCHANGED FOR A TORIC LENS DUE TO REFRACTIVE SURPRISE. THE EXCHANGE RESOLVED THE PROBLEM. CAUSE OF EVENT WAS UNKNOWN. Manufacturer Narrative: H6- DEVICE EVALUATION: LENS WAS RETURNED DRY WITH RESIDUE…
https://www.accessdata.fda.gov/scripts/cdrh/cfdocs/cfMAUDE/Detail.CFM?MDRFOI__ID=16746899&pc=MTA	2023826-2023-01350	2023-03-14 04:00:00	Injury	STAAR SURGICAL COMPANY	2023-04-14 04:00:00	MTA	IMPLANTABLE COLLAMER LENS (ICL)	Misfocusing	Blurred Vision	P030016	1	Event Description: THE REPORTER INDICATED THAT A 13.2MM, VICM5_13.2, -6.50 DIOPTER, IMPLANTABLE COLLAMER LENS WAS IMPLANTED INTO THE PATIENTS LEFT EYE (OS) ON (B)(6) 2022. THE PATIENT EXPERIENCED REFRACTIVE SURPRISE. LENS REMAINS IMPLANTED. CAUSE OF EVENT WAS UNKNOWN. IF ADDITIONAL INFORMATION IS RECEIVED A SUPPLEMENTAL MEDWATCH REPORT WILL BE SUBMITTED. Manufacturer Narrative: B5- PER UPDATED IN…
https://www.accessdata.fda.gov/scripts/cdrh/cfdocs/cfMAUDE/Detail.CFM?MDRFOI__ID=17761001&pc=MTA	2023826-2023-04001	2023-03-17 04:00:00	Injury	STAAR SURGICAL COMPANY	2023-09-15 04:00:00	MTA	IMPLANTABLE COLLAMER LENS (ICL)	Misfocusing	Blurred Vision	P030016	1	Event Description: THE REPORTER INDICATED THAT A 12.1MM VICM512.1 IMPLANTABLE COLLAMER LENS OF A -10.0 DIOPTER WAS IMPLANTED INTO THE PATIENT'S RIGHT EYE (OD) ON (B)(6) 2023. ON (B)(6) 2023, THE LENS WAS EXCHANGED FOR A SAME SIZE LENS DUE TO REFRACTIVE SURPRISE. THE PROBLEM WAS RESOLVED. Manufacturer Narrative: H3: DEVICE EVALUATION: LENS WAS RETURNED IN A MICRO-CENTRIFUGE VIAL, DRY, WITH RESIDUE…
https://www.accessdata.fda.gov/scripts/cdrh/cfdocs/cfMAUDE/Detail.CFM?MDRFOI__ID=16810401&pc=MTA	2023826-2023-01482	2023-03-20 04:00:00	Injury	STAAR SURGICAL COMPANY	2023-04-25 04:00:00	MTA	IMPLANTABLE COLLAMER LENS (ICL)	Misfocusing	Blurred Vision	P030016	1	Event Description: THE REPORTER INDICATED THAT A 13.2MM VICM513.2 IMPLANTABLE COLLAMER LENS OF A -9.0 DIOPTER WAS IMPLANTED INTO THE PATIENT'S LEFT EYE (OS) ON (B)(6) 2023. ON (B)(6) 2023, THE LENS WAS EXCHANGED FOR A REPLACEMENT LENS DUE TO REFRACTIVE SURPRISE. THE PROBLEM WAS RESOLVED. THE CAUSE OF THE EVENT IS UNKNOWN. STATUS OF THE EYE IS REPORTED AS "GOOD". Manufacturer Narrative: H3: DEVICE…
https://www.accessdata.fda.gov/scripts/cdrh/cfdocs/cfMAUDE/Detail.CFM?MDRFOI__ID=16810453&pc=MTA	2023826-2023-01481	2023-03-20 04:00:00	Injury	STAAR SURGICAL COMPANY	2023-04-25 04:00:00	MTA	IMPLANTABLE COLLAMER LENS (ICL)	Misfocusing	Blurred Vision	P030016	1	Event Description: THE REPORTER INDICATED THAT A 13.2MM VICM513.2 IMPLANTABLE COLLAMER LENS OF A -6.5 DIOPTER WAS IMPLANTED INTO THE PATIENT'S RIGHT EYE (OD) ON (B)(6) 2023. ON (B)(6) 2023, THE LENS WAS EXCHANGED FOR A REPLACEMENT LENS DUE TO REFRACTIVE SURPRISE. THE PROBLEM WAS RESOLVED. THE CAUSE OF THE EVENT IS UNKNOWN. STATUS OF THE EYE IS REPORTED AS "GOOD." Manufacturer Narrative: H6: WORK …
https://www.accessdata.fda.gov/scripts/cdrh/cfdocs/cfMAUDE/Detail.CFM?MDRFOI__ID=17592020&pc=MTA	2023826-2023-03620	2023-03-24 04:00:00	Injury	STAAR SURGICAL COMPANY	2023-08-21 04:00:00	MTA	IMPLANTABLE COLLAMER LENS (ICL)	Misfocusing	Blurred Vision	P030016	1	Event Description: THE REPORTER INDICATED THAT A 13.2MM VICMO13.2 IMPLANTABLE COLLAMER LENS OF A -14.0 DIOPTER WAS IMPLANTED INTO THE PATIENT'S LEFT EYE (OS) ON (B)(6) 2022. ON (B)(6) 2023, THE LENS WAS EXCHANGED FOR A TORIC LENS DUE TO REFRACTIVE SURPRISE AND REFRACTIVE CHANGE OVER TIME. THE PROBLEM WAS RESOLVED. CAUSE OF THE EVENT IS UNKNOWN. Manufacturer Narrative: CORRECTED DATA: A2- " ON (B)…
https://www.accessdata.fda.gov/scripts/cdrh/cfdocs/cfMAUDE/Detail.CFM?MDRFOI__ID=17954043&pc=MTA	2023826-2023-04567	2023-03-24 04:00:00	Injury	STAAR SURGICAL COMPANY	2023-10-17 04:00:00	MTA	IMPLANTABLE COLLAMER LENS (ICL)	Misfocusing	Blurred Vision	P030016	1	Event Description: THE REPORTER INDICATED THAT A 13.2MM VICMO13.2 IMPLANTABLE COLLAMER LENS OF -15.5 DIOPTER WAS IMPLANTED INTO THE PATIENT'S RIGHT EYE (OD) ON (B)(6) 2022. ON (B)(6) 2023, THE LENS WAS EXCHANGED FOR A TORIC MODEL LENS DUE TO REFRACTIVE SUPRISE AND REFRACTIVE CHANGE OVERTIME. THE PROBLEM WAS RESOLVED. CAUSE OF THE EVENT IS UNKNOWN. Manufacturer Narrative: CORRECTED DATA: B5: THE R…
https://www.accessdata.fda.gov/scripts/cdrh/cfdocs/cfMAUDE/Detail.CFM?MDRFOI__ID=17213970&pc=MTA	2023826-2023-02554	2023-03-30 04:00:00	Injury	STAAR SURGICAL COMPANY	2023-06-27 04:00:00	MTA	IMPLANTABLE COLLAMER LENS (ICL)	Misfocusing	Blurred Vision	P030016	1	Event Description: THE REPORTER INDICATED THAT THE SURGEON IMPLANTED A 12.6MM VICM5_12.6 IMPLANTABLE COLLAMER LENS OF -6.00 DIOPTER INTO THE PATIENT'S RIGHT EYE (OD) ON (B)(6) 2023. ON (B)(6) 2023 THE LENS WAS EXCHANGED FOR A DIFFERENT POWER LENS DUE TO REFRACTIVE SURPRISE AND THE PROBLEM RESOLVED. CAUSE REPORTED AS UNKNOWN. Manufacturer Narrative: ADDITIONAL INFORMATION: D9: RETURN DATE: 14-JUL-…
https://www.accessdata.fda.gov/scripts/cdrh/cfdocs/cfMAUDE/Detail.CFM?MDRFOI__ID=17214401&pc=MTA	2023826-2023-02555	2023-03-30 04:00:00	Injury	STAAR SURGICAL COMPANY	2023-06-28 04:00:00	MTA	IMPLANTABLE COLLAMER LENS (ICL)	Misfocusing	Blurred Vision	P030016	1	Event Description: THE REPORTER INDICATED THAT THE SURGEON IMPLANTED A 12.6MM VICM5_12.6 IMPLANTABLE COLLAMER LENS OF -5.50 DIOPTER INTO THE PATIENT'S LEFT EYE (OS) ON (B)(6) 2023. ON (B)(6) 2023 THE LENS WAS EXCHANGED FOR A DIFFERENT POWER LENS DUE TO REFRACTIVE SURPRISE AND THE PROBLEM RESOLVED. CAUSE REPORTED AS UNKNOWN. Manufacturer Narrative: ADDITIONAL INFORMATION: D9: RETURN DATE: (B)(6) 2…
https://www.accessdata.fda.gov/scripts/cdrh/cfdocs/cfMAUDE/Detail.CFM?MDRFOI__ID=16991214&pc=MTA	2023826-2023-01769	2023-04-03 04:00:00	Injury	STAAR SURGICAL COMPANY	2023-05-24 04:00:00	MTA	IMPLANTABLE COLLAMER LENS (ICL)	Misfocusing	Blurred Vision	P030016	1	Event Description: THE REPORTER INDICATED THAT A 13.2MM, VICMO13.2, -11.50 DIOPTER, IMPLANTABLE COLLAMER LENS WAS IMPLANTED INTO THE PATIENT'S LEFT EYE (OS) ON (B)(6) 2022. ON (B)(6) 2023 THE LENS WAS EXCHANGED WITH A DIFFERENT POWER TORIC LENS DUE TO REFRACTIVE SURPRISE. THE PROBLEM WAS RESOLVED. CAUSE OF THE EVENT IS REPORTED AS UNKNOWN. Manufacturer Narrative: A4 - UNK. A5 - UNK. A6 - UNK. H6 …
https://www.accessdata.fda.gov/scripts/cdrh/cfdocs/cfMAUDE/Detail.CFM?MDRFOI__ID=17410063&pc=MTA	2023826-2023-03193	2023-04-04 04:00:00	Injury	STAAR SURGICAL COMPANY	2023-07-27 04:00:00	MTA	IMPLANTABLE COLLAMER LENS (ICL)	Misfocusing	Blurred Vision	P030016	1	Event Description: THE REPORTER INDICATED THAT THE SURGEON IMPLANTED A 12.6MM VICMO12.6; -9.0 DIOPTER IMPLANTABLE COLLAMER LENS INTO THE PATIENT'S LEFT EYE (OS) ON (B)(6) 2023. THE PATIENT EXPERIENCED REFRACTIVE SURPRISE. ON (B)(6) 2023 THE LENS WAS EXCHANGED WITH A SAME LENGTH LENS BUT DIFFERENT POWER AND THIS RESOLVED THE PROBLEM. THE CAUSE OF THE EVENT WAS REPORTED AS UNKNOWN. Manufacturer Nar…
[truncated: 14,384 more rows]
