# Supplementary material for: Adverse events associated with Implantable Collamer Lens: insights from the FDA MAUDE database
Source: Front Med (Lausanne). 2025 Jul 21;12:1613060. doi: 10.3389/fmed.2025.1613060 (PMC12319018; doi:10.3389/fmed.2025.1613060)
Supplement: Supplementary file 6 [file Table_5.XLSX]

## Sheet: Sheet1
MTA		QCB
Activation, positioning or separation problem		Activation, positioning or separation problem
Activation Failure		Activation Failure
Activation, Positioning or Separation Problem		Device Dislodged or Dislocated
Device Dislodged or Dislocated		Ejection Problem
Device Slipped		Entrapment of Device
Difficult or Delayed Positioning		Malposition of Device
Difficult to Advance		Positioning Failure
Difficult to Insert		Positioning Problem
Difficult To Position
Difficult to Remove
Ejection Problem
Entrapment of Device
Malposition of Device
Positioning Failure
Positioning Problem
Patient-Device interaction issues		Patient-Device interaction issues
Patient Device Interaction Problem		Patient Device Interaction Problem
Patient-Device Incompatibility		Patient-Device Incompatibility
No AEs		No AEs
No Apparent Adverse Event		No Apparent Adverse Event
No code available		No code available
Adverse Event Without Identified Device or Use Problem		Adverse Event Without Identified Device or Use Problem
Appropriate Term/Code Not Available		Appropriate Term/Code Not Available
Off-label use		Off-label use
Off-Label Use		Off-Label Use
Operation and control Issues		Operation and control Issues
Device Handling Problem		Device Handling Problem
Device Operates Differently Than Expected		Device Operates Differently Than Expected
Improper or Incorrect Procedure or Method		Improper or Incorrect Procedure or Method
Unintended Ejection		Migration or Expulsion of Device
Unintended Movement		Unintended Movement
Optical issues		Optical issues
Misfocusing		Misfocusing
Optical Distortion		Optical Decentration
Optical Problem		Optical Problem
Shape and/or size issues		Shape and/or size issues
Inadequacy of Device Shape and/or Size		Inadequacy of Device Shape and/or Size
Other		Other
Bent		Break
Break		Contamination
Contamination		Contamination /Decontamination Problem
Contamination / Decontamination Problem		Crack
Crack		Cut In Material
Defective Device		Defective Device
Delivered as Unsterile Product		Device Contamination with Chemical or Other Material
Dent in Material		Device Damaged by Another Device
Device Contaminated During Manufacture or Shipping		Device Markings/Labelling Problem
Device Contamination with Chemical or Other Material		Difficult to Fold, Unfold or Collapse
Device Damaged by Another Device		Failure to Unfold or Unwrap
Device Issue		Fracture
Device Markings/Labelling Problem		Insufficient Information
Device remains implanted		Manufacturing, Packaging or Shipping Problem
Difficult to Fold, Unfold or Collapse		Material Deformation
Difficult to Open or Close		Material Discolored
Failure to Read Input Signal		Material Integrity Problem
Failure to Select Signal		Material Opacification
Failure to Unfold or Unwrap		Material Split, Cut or Torn
Fitting Problem		Mechanical Jam
Folded		Missing Value Reason
Fracture		Packaging Problem
Human-Device Interface Problem		Particulates
Inaccurate Information		Physical Resistance/Sticking
Insufficient Information		Product Quality Problem
Manufacturing, Packaging or Shipping Problem		Shelf Life Exceeded
Material Deformation		Torn Material
Material Discolored		Use of Device Problem
Material Opacification
Material Twisted/Bent
Mechanical Jam
Mechanical Problem
Missing Value Reason
Optical Discoloration
Output Problem
Packaging Problem
Particulates
Product Quality Problem
Scratched Material
Shelf Life Exceeded
Split
Sticking
Torn Material
Vitritis
