# Supplementary material for: Adverse events associated with Implantable Collamer Lens: insights from the FDA MAUDE database
Source: Front Med (Lausanne). 2025 Jul 21;12:1613060. doi: 10.3389/fmed.2025.1613060 (PMC12319018; doi:10.3389/fmed.2025.1613060)
Supplement: Supplementary file 7 [file Table_6.XLSX]

## Sheet: Sheet1
MTA		QCB
No patient impact		No patient impact
No Clinical Signs, Symptoms or Conditions		No Clinical Signs, Symptoms or Conditions
No Consequences Or Impact To Patient		No Consequences Or Impact To Patient
No Known Impact Or Consequence To Patient		No Known Impact Or Consequence To Patient
No Patient Involvement		No Patient Involvement
No code available		No code available
Appropriate Clinical Signs, Symptoms, Conditions Term / Code Not Available		Appropriate Clinical Signs,Symptoms, Conditions Term/Code Not Available
No Code Available		No Code Available
Not Applicable		Not Applicable
Vision issues		Vision issues
Blurred Vision		Blurred Vision
Fatigue		Fatigue
Halo		Halo
Loss of Vision		Loss of Vision
Visual Disturbances		Visual Disturbances
Visual Impairment		Visual Impairment
IOP issues		IOP issues
Eye Pain		Eye Pain
Glaucoma		Glaucoma
Headache		Headache
Intraocular Pressure Increased		Intraocular Pressure Decreased
Intraocular Pressure, Delayed, Uncontrolled		Intraocular Pressure Increased
Nausea		Intraocular Pressure, Delayed, Uncontrolled
Pain		Nausea
Pupillary Block		Pain
Vomiting		Pupillary Block
		Vomiting
Lens-related issues		Lens-related issues
Capsular Bag Tear		Capsular Bag Tear
Capsular Contracture		Cataract
Cataract, Induced		Cataract, Induced
Cataract
Intraocular inflammation and infection		Intraocular inflammation and infection
Endophthalmitis		Cyclitis
Hypopyon		Endophthalmitis
Inflammation		Hypopyon
Intraocular Infection		Inflammation
Iritis		Iritis
Toxic Anterior Segment Syndrome (TASS)		Toxic Anterior Segment Syndrome (TASS)
Uveitis		UGH (Uveitis Glaucoma Hyphema) Syndrome
		Uveitis
Cornea issues		Cornea issues
Corneal Abrasion		Clouding, Central Corneal
Corneal Clouding/Hazing		Corneal Clouding/Hazing
Corneal Decompensation		Corneal Decompensation
Corneal Edema		Corneal Edema
Corneal Touch		Corneal Touch
Corneal Ulcer		Corneal Ulcer
Edema		Edema
Keratitis		Keratitis
Other		Other
Anxiety		Conjunctivitis
Burning Sensation		Cyst(s)
Conjunctivitis		Discomfort
Cyst(s)		Dizziness
Discomfort		Dry Eye(s)
Dizziness		Eye Injury
Dry Eye(s)		Foreign Body Sensation in Eye
Excessive Tear Production		Hernia
Eye Injury		Hyphema
Failure of Implant		Insufficient Information
Foreign Body Sensation in Eye		Low Blood Pressure/ Hypotension
Hemorrhage/Bleeding		Macular Edema
Hyphema		Missing Value Reason
Insufficient Information		No Information
Irritation		Overwear Syndrome
Itching Sensation		Patient Problem/Medical Problem
Missing Value Reason		Red Eye(s)
No Information		Retinal Detachment
Numbness		Swelling/ Edema
Obstruction/Occlusion		Vitrectomy
Optical Nerve Damage		Vitreous Floaters
Patient Problem/Medical Problem
Prolapse
Pulmonary Regurgitation
Reaction
Red Eye(s)
Retinal Detachment
Retinal Tear
Swelling
Vertigo
Vitrectomy
Vitreous Detachment
Vitreous Floaters
Vitreous Hemorrhage
