# Supplementary material for: Adverse events associated with Implantable Collamer Lens: insights from the FDA MAUDE database
Source: Front Med (Lausanne). 2025 Jul 21;12:1613060. doi: 10.3389/fmed.2025.1613060 (PMC12319018; doi:10.3389/fmed.2025.1613060)
Supplement: Supplementary file 8 [file Table_7.XLSX]

## Sheet: Supplementary_Data_5
Web Address	Report Number	Event Date	Event Type	Manufacturer	Date Received	Product Code	Brand Name	Device Problem	Patient Problem	PMA/PMN Number	Event Text	Surgical Eye Laterality	Reporter Occupation	reportDate	Year	Patient Age	Patient Sex
https://www.accessdata.fda.gov/scripts/cdrh/cfdocs/cfMAUDE/Detail.CFM?MDRFOI__ID=13765543&pc=MTA	2023826-2022-00787	2022-01-21 05:00:00	Malfunction	STAAR SURGICAL COMPANY	2022-03-15 04:00:00	MTA	IMPLANTABLE COLLAMER LENS (ICL)	No Apparent Adverse Event			Event Description: THE REPORTER INDICATED THAT WHILE ATTEMPTING TO IMPLANT A 12.6MM VICM5_12.6; -7.5 DIOPTER IMPLANTABLE COLLAMER LENS INTO THE PATIENT'S RIGHT EYE (OD) ON (B)(6) 2022; THE LENS TORE. THERE WAS NO PATIENT CONTACT. A REPLACEMENT LENS OF THE SAME MODEL/LENGTH WAS IMPLANTED AND THIS RESOLVED THE PROBLEM. THE CAUSE OF THE EVENT WAS REPORTED AS UNKNOWN. Manufacturer Narrative: PMA/510(…	OD	Physician	03/11/2022	2022
https://www.accessdata.fda.gov/scripts/cdrh/cfdocs/cfMAUDE/Detail.CFM?MDRFOI__ID=11713110&pc=MTA	2023826-2021-01141	2018-09-01 04:00:00	Injury	STAAR SURGICAL COMPANY	2021-04-23 04:00:00	MTA	IMPLANTABLE COLLAMER LENS (ICL)	Adverse Event Without Identified Device or Use Problem	Appropriate Clinical Signs, Symptoms, Conditions Term / Code Not Available	NA	Event Description: THE REPORTER INDICATED THE SURGEON IMPLANTED A 13.2MM VICMO13.2 IMPLANTABLE COLLAMER LENS, -18.00 DIOPTER, IN THE PATIENTS RIGHT EYE (OD) ON (B)(6) 2017. THE REPORTER INDICATED THE PATIENT HAD SIGNIFICANT REDUCTION OF ENDOTHELIAL CELL COUNT OR SIGNIFICANT ENDOTHELIAL CELL LOSS OVER A PERIOD OF 3 YEARS. THE SURGEON HAS DECIDED TO LEAVE THE LENS IMPLANTED AND THE PATIENT WILL BE …	OD		03/25/2021	2021	30
https://www.accessdata.fda.gov/scripts/cdrh/cfdocs/cfMAUDE/Detail.CFM?MDRFOI__ID=11738872&pc=MTA	2023826-2021-01192	2018-10-31	Injury	STAAR SURGICAL COMPANY	2021-04-28	MTA	IMPLANTABLE COLLAMER LENS (ICL)	Adverse Event Without Identified Device or Use Problem	Appropriate Clinical Signs, Symptoms, Conditions Term / Code Not Available	N/A	Event Description: THE REPORTER INDICATED THAT THE SURGEON IMPLANTED A 13.2MM VICMO13.2, -09.50 DIOPTER, IMPLANTABLE COLLAMER LENS INTO THE PATIENT'S LEFT EYE (OS) ON (B)(6) 2018. THE LENS WAS EXPLANTED ON (B)(6) 2019 DUE TO PIGMENT DISPERSION. THIS RESOLVED THE PROBLEM. REPORTEDLY, IN ORDER TO PREVENT THE ADVERSE EFFECTS CAUSED BY LONG-TERM EXISTENCE IN THE FUTURE, THE LENS WAS REMOVED FROM POST…	OS	Physician	04/06/2021	2021	44
https://www.accessdata.fda.gov/scripts/cdrh/cfdocs/cfMAUDE/Detail.CFM?MDRFOI__ID=10900025&pc=MTA	2023826-2020-02749	2020-10-14 04:00:00	Injury	STAAR SURGICAL COMPANY	2020-11-25 05:00:00	MTA	IMPLANTABLE COLLAMER LENS (ICL)	Adverse Event Without Identified Device or Use Problem	Appropriate Clinical Signs, Symptoms, Conditions Term / Code Not Available	NA#S-P#NA	Event Description: THE REPORTER INDICATED THE SURGEON INSERTED AND REMOVED A 12.6MM VICMO12.6 IMPLANTABLE COLLAMER LENS, -13.00 DIOPTER, WITHIN THE SAME SURGERY DUE TO THE LENS TORE DURING DELIVERY INTO THE PATIENTS RIGHT EYE (OD). APPROXIMATELY 2 WEEKS LATER IT WAS FOUND THE PATIENTS ENDOTHELIAL VALUE HAD DECREASED SIGNIFICANTLY. THE SURGEON DID NOT IMPLANT ANOTHER ICL LENS, AND THE PATIENT IS B…	OD		10/30/2020	2020	36
https://www.accessdata.fda.gov/scripts/cdrh/cfdocs/cfMAUDE/Detail.CFM?MDRFOI__ID=11507492&pc=MTA	2023826-2021-00661	2021-01-29	Injury	STAAR SURGICAL COMPANY	2021-03-17	MTA	IMPLANTABLE COLLAMER LENS	Adverse Event Without Identified Device or Use Problem	Appropriate Clinical Signs, Symptoms, Conditions Term / Code Not Available	NA	Event Description: THE REPORTER INDICATED THAT THE SURGEON IMPLANTED A 12.1MM VICMO12.1 IMPLANTABLE COLLAMER LENS, -16.5 DIOPTER INTO THE PATIENT'S RIGHT EYE (OD) ON (B)(6) 2021. THE SURGEON REPORTS AN UNREACTIVE (FIXED) PUPIL. REPORTEDLY, THE LENS REMAINS IMPLANTED. THE CAUSE IS REPORTED AS OTHER: THE SURGEON THINKS IT'S RELATED TO OVD REMANANT. THE PUPIL IS UNREACTIVE, EVEN WITH PIL TREATMENT T…	OD	Physician	02/17/2021	2021	39
https://www.accessdata.fda.gov/scripts/cdrh/cfdocs/cfMAUDE/Detail.CFM?MDRFOI__ID=12443637&pc=MTA	2023826-2021-03481	2021-06-07 04:00:00	Injury	STAAR SURGICAL COMPANY	2021-09-08 04:00:00	MTA	IMPLANTABLE COLLAMER LENS (ICL)	Adverse Event Without Identified Device or Use Problem	Appropriate Clinical Signs, Symptoms, Conditions Term / Code Not Available	NA	Event Description: THE REPORTER INDICATED THE SURGEON IMPLANTED A 12.1MM VICM5_12.1 IMPLANTABLE COLLAMER LENS, -09.00 DIOPTER, INTO THE PATIENTS RIGHT EYE (OD), ON (B)(6) 2021. THE LENS WAS EXPLANTED ON (B)(6) 2021 DUE TO THE PATIENT EXPECTED A BETTER NEAR VISION OUTCOME. THE LENS WAS REPLACED WITH ANOTHER SAME MODEL/LENGTH BUT DIFFERENT DIOPTER LENS BUT THE PROBLEM WAS NOT RESOLVED. POST-OP THE …	OD		08/10/2021	2021	47
https://www.accessdata.fda.gov/scripts/cdrh/cfdocs/cfMAUDE/Detail.CFM?MDRFOI__ID=12478420&pc=MTA	2023826-2021-03565	2021-09-01 04:00:00	Malfunction	STAAR SURGICAL COMPANY	2021-09-15 04:00:00	MTA	IMPLANTABLE COLLAMER LENS (ICL)	Adverse Event Without Identified Device or Use Problem	Appropriate Clinical Signs, Symptoms, Conditions Term / Code Not Available	P030016	Event Description: THE REPORTER INDICATED THE SURGEON INSERTED AND REMOVED A 13.2MM MICL13.2 IMPLANTABLE COLLAMER LENS, -10.50 DIOPTER, INTO THE PATIENTS RIGHT EYE (OD) 2 TIMES, DURING THE SAME SURGERY DUE TO THE LENS WOULD NOT UNFOLD. THERE WAS SOME IRIS PROLAPSE DURING THE PROCEDURE. AFTER THE SECOND TRY, THE SURGEON REPLACED THE LENS WITH ANOTHER SAME MODEL/LENGTH LENS AND THE PROBLEM WAS RESO…	OD	Nurse	09/01/2021	2021		Male
https://www.accessdata.fda.gov/scripts/cdrh/cfdocs/cfMAUDE/Detail.CFM?MDRFOI__ID=14107551&pc=MTA	2023826-2022-01197	2022-02-18 05:00:00	Injury	STAAR SURGICAL COMPANY	2022-04-13 04:00:00	MTA	IMPLANTABLE COLLAMER LENS (ICL)	Adverse Event Without Identified Device or Use Problem	Appropriate Clinical Signs, Symptoms, Conditions Term / Code Not Available	P030016	Event Description: THE REPORTER INDICATED THE SURGEON IMPLANTED A SPHERICAL NON-TORIC ICL IMPLANTABLE COLLAMER LENS, IN THE PATIENTS LEFT EYE (OS) ON (B)(6) 2022. THE PATIENT UNDERWENT PRK SURGERY FOR ASTIGMATISM ON (B)(6) 2022 AND IS NOW DOING WELL. THE LENS REMAINED IMPLANTED. ADDITIONAL INFORMATION HAS BEEN REQUESTED BUT NONE HAS BEEN FORTHCOMING. Manufacturer Narrative: WEIGHT: UNK. ETHNICITY…	OS	Physician	03/14/2022	2022	41	Male
https://www.accessdata.fda.gov/scripts/cdrh/cfdocs/cfMAUDE/Detail.CFM?MDRFOI__ID=14310615&pc=MTA	2023826-2022-01395	2022-04-01 04:00:00	Malfunction	STAAR SURGICAL COMPANY	2022-05-06 04:00:00	MTA	IMPLANTABLE COLLAMER LENS (ICL)	Adverse Event Without Identified Device or Use Problem	Appropriate Clinical Signs, Symptoms, Conditions Term / Code Not Available	P030016	Event Description: THE REPORTER INDICATED THAT A 13.2MM, MICL13.2, -7.0 DIOPTER IMPLANTABLE COLLAMER LENS WAS IMPLANTED INTO THE PATIENTS RIGHT EYE (OD) ON (B)(6) 2022. PIGMENT DISPERSION, IRIS ATROPHY, FIXED PUPIL WITH DIFFUSE TRANSILLUMINATION IRIS DEFECTS (TID) WAS OBSERVED, LENS REMAINS IMPLANTED. IN THE REPORTER OPINION THE CAUSE OF THIS EVENT IS UNKNOWN. IT WAS ALSO REPORTED THAT THE DEVICE…	OD	Physician	02/23/2022	2022	30	Male
https://www.accessdata.fda.gov/scripts/cdrh/cfdocs/cfMAUDE/Detail.CFM?MDRFOI__ID=15937259&pc=MTA	2023826-2022-04286	2022-05-16 04:00:00	Injury	STAAR SURGICAL COMPANY	2022-12-07 05:00:00	MTA	IMPLANTABLE COLLAMER LENS (ICL)	Adverse Event Without Identified Device or Use Problem	Appropriate Clinical Signs, Symptoms, Conditions Term / Code Not Available	P030016	Event Description: THE REPORTER INDICATED THAT A 13.2MM VICM5 13.2 IMPLANTABLE COLLAMER LENS OF -8.00 DIOPTER WAS IMPLANTED INTO THE PATIENTS LEFT EYE (OS) ON (B)(6) 2021. ON (B)(6) 2022 THE LENS WAS EXCHANGED FOR A SAME MODEL;SIZE LENS BUT DIFFERENT DIOPTER DUE TO PATIENT DISSATISFACTION DUE TO UNDER CORRECTION. THE REPLACEMENT LENS RESOLVED THE PROBLEM. Manufacturer Narrative: (B)(4). CLAIM# (B…	OS	Physician	11/07/2022	2022	27	Female
https://www.accessdata.fda.gov/scripts/cdrh/cfdocs/cfMAUDE/Detail.CFM?MDRFOI__ID=16032620&pc=MTA	2023826-2022-04640	2022-07-18 04:00:00	Injury	STAAR SURGICAL COMPANY	2022-12-22 05:00:00	MTA	IMPLANTABLE COLLAMER LENS (ICL)	Adverse Event Without Identified Device or Use Problem	Appropriate Clinical Signs, Symptoms, Conditions Term / Code Not Available	P030016	Event Description: THE REPORTER INDICATED THAT A 12.6MM VICMO12.6 -7.00 DIOPTER IMPLANTABLE COLLAMER LENS WAS IMPLANTED INTO THE PATIENTS RIGHT EYE (OD) ON (B)(6) 2022. ON (B)(6) 2022 THE LENS WAS EXPLANTED DUE TO SIGNIFICANT REDUCTION OF ENDOTHELIAL CELL LOSS/COUNT. IT WAS REPORTED THAT THE PROBLEM RESOLVED. Manufacturer Narrative: (B)(4). LENS WORK ORDER SEARCH: NO SIMILAR COMPLAINT TYPE EVENTS…	OD	Physician	11/24/2022	2022	28	Female
https://www.accessdata.fda.gov/scripts/cdrh/cfdocs/cfMAUDE/Detail.CFM?MDRFOI__ID=16032644&pc=MTA	2023826-2022-04641	2022-07-18 04:00:00	Injury	STAAR SURGICAL COMPANY	2022-12-22 05:00:00	MTA	IMPLANTABLE COLLAMER LENS (ICL)	Adverse Event Without Identified Device or Use Problem	Appropriate Clinical Signs, Symptoms, Conditions Term / Code Not Available	P030016	Event Description: THE REPORTER INDICATED THAT A 12.6MM VICMO12.6 -7.00 DIOPTER IMPLANTABLE COLLAMER LENS WAS IMPLANTED INTO THE PATIENTS LEFT EYE (OS) ON (B)(6) 2022. ON (B)(6) 2022 THE LENS WAS EXPLANTED DUE TO SIGNIFICANT REDUCTION OF ENDOTHELIAL CELL LOSS/COUNT. IT WAS REPORTED THAT THE PROBLEM RESOLVED. Manufacturer Narrative: (B)(4). LENS WORK ORDER SEARCH: NO SIMILAR COMPLAINT TYPE EVENTS …	OS	Physician	11/24/2022	2022	28	Female
https://www.accessdata.fda.gov/scripts/cdrh/cfdocs/cfMAUDE/Detail.CFM?MDRFOI__ID=16018654&pc=MTA	2023826-2022-04627	2022-09-27 04:00:00	Injury	STAAR SURGICAL COMPANY	2022-12-20 05:00:00	MTA	IMPLANTABLE COLLAMER LENS (ICL)	Adverse Event Without Identified Device or Use Problem	Appropriate Clinical Signs, Symptoms, Conditions Term / Code Not Available	P030016	Event Description: THE REPORTER INDICATED THAT A 12.6MM VICMO12.6 IMPLANTABLE COLLAMER LENS -8.50 DIOPTER WAS IMPLANTED INTO THE PATIENT'S RIGHT EYE (OD) ON (B)(6) 2022. ON (B)(6) 2022 THE LENS WAS EXCHANGED FOR A SHORTER LENGTH LENS DUE TO SIGNIFICANT REDUCTION OF IRIDO-CORNEAL ANGELS. THE EXCHANGE RESOLVED THE PROBLEM. CAUSE OF EVENT WAS REPORTED AS UNKNOWN. Manufacturer Narrative: (B)(4). CLAI…	OD	Physician	11/21/2022	2022	28	Female
https://www.accessdata.fda.gov/scripts/cdrh/cfdocs/cfMAUDE/Detail.CFM?MDRFOI__ID=16018234&pc=MTA	2023826-2022-04628	2022-09-28 04:00:00	Injury	STAAR SURGICAL COMPANY	2022-12-20 05:00:00	MTA	IMPLANTABLE COLLAMER LENS (ICL)	Adverse Event Without Identified Device or Use Problem	Appropriate Clinical Signs, Symptoms, Conditions Term / Code Not Available	P030016	Event Description: THE REPORTER INDICATED THAT A 12.6MM VICMO12.6 IMPLANTABLE COLLAMER LENS -8.50 DIOPTER WAS IMPLANTED INTO THE PATIENT'S LEFT EYE (OS) ON (B)(6) 2022. ON (B)(6) 2022 THE LENS WAS EXCHANGED FOR A SHORTER LENGTH LENS DUE TO SIGNIFICANT REDUCTION OF IRIDO-CORNEAL ANGELS. THE EXCHANGE RESOLVED THE PROBLEM. CAUSE OF EVENT WAS REPORTED AS UNKNOWN. Manufacturer Narrative: (B)(4). CLAIM…	OS	Physician	11/21/2022	2022	28	Female
https://www.accessdata.fda.gov/scripts/cdrh/cfdocs/cfMAUDE/Detail.CFM?MDRFOI__ID=16034514&pc=MTA	2023826-2022-04643	2022-11-10 05:00:00	Injury	STAAR SURGICAL COMPANY	2022-12-22 05:00:00	MTA	IMPLANTABLE COLLAMER LENS (ICL)	Adverse Event Without Identified Device or Use Problem	Appropriate Clinical Signs, Symptoms, Conditions Term / Code Not Available	P030016	Event Description: THE REPORTER INDICATED THAT A 13.2MM VICM5_13.2 IMPLANTABLE COLLAMER LENS OF -3.00 DIOPTER WAS IMPLANTED INTO THE PATIENT'S RIGHT EYE (OD) ON (B)(6) 2022. ON (B)(6) 2022 THE LENS WAS EXPLANTED. THE REPORTER STATED "WE EXPLANTED THE LENS BECAUSE THE PATIENT WAS NOT PHYSICALLY SATISFIED. SHE SAW ONE PUPIL BIGGER THAN THE OTHER. SHE NOTICED THE PUPIL OF THE RIGHT EYE WAS LARGER TH…	OD	Physician	11/25/2022	2022	32	Female
https://www.accessdata.fda.gov/scripts/cdrh/cfdocs/cfMAUDE/Detail.CFM?MDRFOI__ID=18014407&pc=MTA	2023826-2023-04782	2023-01-20 05:00:00	Injury	STAAR SURGICAL COMPANY	2023-10-26 04:00:00	MTA	IMPLANTABLE COLLAMER LENS (ICL)	Adverse Event Without Identified Device or Use Problem	Appropriate Clinical Signs, Symptoms, Conditions Term / Code Not Available	P030016	Event Description: THE REPORTER INDICATED THAT A 12.1MM VICM5 12.1 IMPLANTABLE COLLAMER LENS OF -12.00 DIOPTER WAS IMPLANTED INTO THE PATIENTS RIGHT EYE (OD) ON (B)(6) 2023. ON (B)(6) 2023 THE LENS WAS EXCHANGED FOR A TORIC LENS DUE TO PATIENT DISSATISFACTION. THE REPLACEMENT LENS RESOLVED THE PROBLEM. Manufacturer Narrative: H6-CLINICAL CODE: 4681- PATIENT DISSATISFACTION. H6-INVESTIGATION TYPE …	OD	Physician	09/26/2023	2023	20	Female
https://www.accessdata.fda.gov/scripts/cdrh/cfdocs/cfMAUDE/Detail.CFM?MDRFOI__ID=16739732&pc=MTA	2023826-2023-01369	2023-03-20 04:00:00	Malfunction	STAAR SURGICAL COMPANY	2023-04-13 04:00:00	MTA	IMPLANTABLE COLLAMER LENS (ICL)	Adverse Event Without Identified Device or Use Problem	Appropriate Clinical Signs, Symptoms, Conditions Term / Code Not Available	P030016	Event Description: THE REPORTER INDICATED THAT THE SURGEON IMPLANTED A 13.2MM VICMO13.2; -7.50 DIOPTER IMPLANTABLE COLLAMER LENS INTO THE PATIENT'S RIGHT EYE (OD) ON (B)(6) 2023. THE SURGEON NOTES THE PATIENT HAD "BIGGER PUPIL DIAMETER POSTOP THAN PREOP". LENS REMAINS IMPLANTED. THE CAUSE OF THE EVENT WAS REPORTED AS UNKNOWN. Manufacturer Narrative: CORRECTED DATA: B5: SHOULD BE CORRECTED TO: THE…	OD	Physician	03/24/2023	2023	25	Female
https://www.accessdata.fda.gov/scripts/cdrh/cfdocs/cfMAUDE/Detail.CFM?MDRFOI__ID=17225357&pc=MTA	2023826-2023-02469	2023-03-22 04:00:00	Injury	STAAR SURGICAL COMPANY	2023-06-29 04:00:00	MTA	IMPLANTABLE COLLAMER LENS (ICL)	Adverse Event Without Identified Device or Use Problem	Appropriate Clinical Signs, Symptoms, Conditions Term / Code Not Available	P030016	Event Description: THE REPORTER INDICATED THE SURGEON IMPLANTED A 12.6MM VICM5_12.6 IMPLANTABLE COLLAMER LENS, -14.00 DIOPTER, IN THE PATIENTS LEFT EYE (OS) ON (B)(6) 2023. THE LENS WAS REMOVED ON (B)(6) 2023 DUE TO PATIENT EXPERIENCED REFRACTIVE CHANGE OVERTIME. THE LENS WAS REPLACED WITH A DIFFERENT MODEL/POWER LENS AND THE PROBLEM WAS RESOLVED. THE CAUSE OF THE EVENT WAS UNKNOWN. Manufacturer …	OS	Physician	06/02/2023	2023	35	Male
https://www.accessdata.fda.gov/scripts/cdrh/cfdocs/cfMAUDE/Detail.CFM?MDRFOI__ID=18116582&pc=MTA	2023826-2023-04949	2023-06-08 04:00:00	Injury	STAAR SURGICAL COMPANY	2023-11-10 05:00:00	MTA	IMPLANTABLE COLLAMER LENS (ICL)	Adverse Event Without Identified Device or Use Problem	Appropriate Clinical Signs, Symptoms, Conditions Term / Code Not Available	P030016	Event Description: THE REPORTER INDICATED THAT A 12.6MM VICM5 12.6 IMPLANTABLE COLLAMER LENS OF -5.00 DIOPTER WAS IMPLANTED INTO THE PATIENTS LEFT EYE (OS) ON (B)(6) 2023. ON (B)(6) 2023 THE LENS WAS EXCHANGED FOR A TORIC LENS DUE TO PATIENT DISSATISFACTION-VISUAL ACUITY. THE REPLACEMENT LENS RESOLVED THE PROBLEM. Manufacturer Narrative: H6-CLINICAL CODE 4581: PATIENT DISSATISFACTION WITH VISUAL …	OS	Physician	10/11/2023	2023	30	Female
https://www.accessdata.fda.gov/scripts/cdrh/cfdocs/cfMAUDE/Detail.CFM?MDRFOI__ID=17655765&pc=MTA	2023826-2023-03799	2023-07-26 04:00:00	Malfunction	STAAR SURGICAL COMPANY	2023-08-30 04:00:00	MTA	IMPLANTABLE COLLAMER LENS (ICL)	Adverse Event Without Identified Device or Use Problem	Appropriate Clinical Signs, Symptoms, Conditions Term / Code Not Available	P030016	Event Description: THE REPORTER INDICATED THAT THE SURGEON IMPLANTED A 13.2MM VICMO13.2; -10.0 DIOPTER IMPLANTABLE COLLAMER LENS INTO THE PATIENT'S LEFT EYE (OS) ON (B)(6) 2023. THE SURGEON NOTES THERE WAS INTRAOCULAR HEMORRHAGE AND INTRAOPERATIVELY THE LENS WAS REMOVED. ON (B)(6) 2023 A REPLACEMENT LENS OF SHORTER LENGTH WAS IMPLANTED AND THIS RESOLVED THE PROBLEM. THE CAUSE OF THE EVENT WAS REP…	OS	Physician	08/21/2023	2023	31	Female
https://www.accessdata.fda.gov/scripts/cdrh/cfdocs/cfMAUDE/Detail.CFM?MDRFOI__ID=18376653&pc=MTA	2023826-2023-05568	2023-09-09 04:00:00	Injury	STAAR SURGICAL COMPANY	2023-12-21 05:00:00	MTA	IMPLANTABLE COLLAMER LENS (ICL)	Adverse Event Without Identified Device or Use Problem	Appropriate Clinical Signs, Symptoms, Conditions Term / Code Not Available	P030016	Event Description: THE REPORTER INDICATED THE SURGEON IMPLANTED A 12.1MM VICM5_12.1 IMPLANTABLE COLLAMER LENS, -02.75 DIOPTER, INTO THE PATIENTS RIGHT EYE (OD) ON (B)(6) 2023. THE LENS WAS EXPLANTED ON (B)(6) 2023 DUE TO PATIENT DISSATISFACTION WITH NEAR VISION. THE LENS WAS REPLACED WITH ANOTHER SAME MODEL/LENGTH BUT DIFFERENT DIOPTER (02.25) LENS AND THE PROBLEM WAS RESOLVED. Manufacturer Narra…	OD	Physician	12/05/2023	2023	43	Female
https://www.accessdata.fda.gov/scripts/cdrh/cfdocs/cfMAUDE/Detail.CFM?MDRFOI__ID=10659707&pc=MTA	2023826-2020-02350		Injury	STAAR SUGICAL COMPANY	2020-10-09 04:00:00	MTA	IMPLANTABLE COLLAMER LENS (ICL)	Adverse Event Without Identified Device or Use Problem	Appropriate Clinical Signs, Symptoms, Conditions Term / Code Not Available	P030016	Event Description: THE REPORTER INDICATED THAT A 12.6MM, MICL12.6,-5.0 DIOPTER IMPLANTABLE COLLAMER LENS WAS IMPLANTED INTO THE PATIENTS EYE ON (B)(6) 2020. ON (B)(6) 2020 A REMOVAL AND EXCHANGE WAS PERFORMED DUE TO SIZING AND ANGLE CLOSURE. THE REPORTER STATED " NO PERMANENT PATIENT INJURY ALTHOUGH THERE HAD BEEN TEMPORARY ANGLE CLOSURE NECESSITATING ADDITIONAL PI'S AND INTERVENTION." ADDITIONAL…	NA		09/11/2020	2020
https://www.accessdata.fda.gov/scripts/cdrh/cfdocs/cfMAUDE/Detail.CFM?MDRFOI__ID=11651548&pc=MTA	2023826-2021-00887		Injury	STAAR SURGICAL COMPANY	2021-04-12 04:00:00	MTA	IMPLANTABLE COLLAMER LENS (ICL)	Adverse Event Without Identified Device or Use Problem	Appropriate Clinical Signs, Symptoms, Conditions Term / Code Not Available	P030016	Event Description: THE REPORTER INDICATED THAT THE SURGEON IMPLANTED A 13.2MM MICL 13.2, -12.0 DIOPTER, IMPLANTABLE COLLAMER LENS INTO THE PATIENT'S RIGHT EYE (OD) ON (B)(6) 2020. REPORTEDLY, LENS IS TOO BIG AND CAUSING NARROW ANGLES. SURGEON WOULD LIKE TO EXCHANGE FOR A SHORTER LENGTH LENS. LENS REMAINS IMPLANTED. ADDITIONAL INFORMATION HAS BEEN REQUESTED BUT NONE HAS BEEN FORTHCOMING. IF ADDITI…	OD	Other Health Care Professional	03/23/2021	2021		Female
https://www.accessdata.fda.gov/scripts/cdrh/cfdocs/cfMAUDE/Detail.CFM?MDRFOI__ID=11738951&pc=MTA	2023826-2021-01202		Malfunction	STAAR SURGICAL COMPANY	2021-04-28	MTA	IMPLANTABLE COLLAMER LENS (ICL)	Adverse Event Without Identified Device or Use Problem	Appropriate Clinical Signs, Symptoms, Conditions Term / Code Not Available	P030016	Event Description: THE REPORTER INDICATED THAT THE SURGEON IMPLANTED A 12.6MM MICL12.6, -12.0 DIOPTER, IMPLANTABLE COLLAMER LENS, INTO THE PATIENT'S RIGHT EYE(OD) ON (B)(6) 2021. NARROW ANGLES ARE BEING OBSERVED. LENS REMAINS IMPLANTED AND PATIENT IS UNDER OBSERVATION. PER REPORTER ON (B)(6) 2021, "ANGLE HAS OPENED MORE AND THE PRESSURE IS STABILIZED TO NORMAL. THE SURGEON IS CLOSLY WATCHING THE …	OD	Other Health Care Professional	04/07/2021	2021
https://www.accessdata.fda.gov/scripts/cdrh/cfdocs/cfMAUDE/Detail.CFM?MDRFOI__ID=13002075&pc=MTA	2023826-2021-04802		Injury	STAAR SURGICAL COMPANY	2021-12-14 05:00:00	MTA	IMPLANTABLE COLLAMER LENS (ICL)	Adverse Event Without Identified Device or Use Problem	Appropriate Clinical Signs, Symptoms, Conditions Term / Code Not Available	NA	Event Description: THE REPORTER INDICATED THE SURGEON IMPLANTED A 13.2MM VICM5_13.2 IMPLANTABLE COLLAMER LENS, -09.50 DIOPTER INTO THE PATIENTS RIGHT EYE (OD) ON (B)(6) 2021. THIS LENS WAS THE REPLACEMENT LENS FOR MFR. REPORT#: 2023826-2021-03077. DUE TO IRIS PROLAPSE DURING THE EXCHANGE, THE PUPIL WAS DISTORTED TEMPORALLY OUTWARD. THE IRIS PROLAPSE HAS BEEN RESOLVED AND NO SURGICAL INTERVENTION …	OD	Physician	08/06/2021	2021		Male
https://www.accessdata.fda.gov/scripts/cdrh/cfdocs/cfMAUDE/Detail.CFM?MDRFOI__ID=13006655&pc=MTA	2023826-2021-04886		Malfunction	STAAR SURGICAL COMPANY	2021-12-14 05:00:00	MTA	IMPLANTABLE COLLAMER LENS (ICL)	Adverse Event Without Identified Device or Use Problem	Appropriate Clinical Signs, Symptoms, Conditions Term / Code Not Available		Event Description: THE REPORTER INDICATED THAT THE SURGEON IMPLANTED A 13.2MM VICM5_13.2; -2.50 DIOPTER IMPLANTABLE COLLAMER LENS INTO THE PATIENT'S RIGHT EYE (OD) ON (B)(6) 2021 AS A REPLACEMENT LENS. THE PATIENT EXPERIENCED "MINOR VOLCANO EFFECT" AND NOTED "BUT THE CHAMBER IS DEEP". LENS REMAINS IMPLANTED.Event Description: THE REPORTER INDICATED THAT THE SURGEON IMPLANTED A 13.2MM VICM5_13.2; …	OD	Physician	11/18/2021	2021
https://www.accessdata.fda.gov/scripts/cdrh/cfdocs/cfMAUDE/Detail.CFM?MDRFOI__ID=15153632&pc=MTA	2023826-2022-02509		Injury	STAAR SURGICAL COMPANY	2022-08-02 04:00:00	MTA	IMPLANTABLE COLLAMER LENS (ICL)	Adverse Event Without Identified Device or Use Problem	Appropriate Clinical Signs, Symptoms, Conditions Term / Code Not Available	NA	Event Description: THE REPORTER INDICATED THE SURGEON IMPLANTED A 12.6MM VICM6_12.6 IMPLANTABLE COLLAMER LENS, -08.50 DIOPTER INTO THE PATIENTS RIGHT EYE (OD) ON (B)(6) 2021. THE LENS WAS EXPLANTED ON (B)(6) 2022 DUE TO PATIENT EXPERIENCED PERMANENT LOSS OF BCVA AND THE PROBLEM WAS RESOLVED. THE PATIENT HAD A REFRACTIVE LENS EXCHANGE WITH A TRIFOCAL LIO. THE CAUSE OF THE EVENT WAS UNKNOWN. Manufa…	OD	Physician	07/05/2022	2022		Female
https://www.accessdata.fda.gov/scripts/cdrh/cfdocs/cfMAUDE/Detail.CFM?MDRFOI__ID=15498836&pc=MTA	2023826-2022-03340		Malfunction	STAAR SURGICAL COMPANY	2022-09-28 04:00:00	MTA	IMPLANTABLE COLLAMER LENS (ICL)	Adverse Event Without Identified Device or Use Problem	Appropriate Clinical Signs, Symptoms, Conditions Term / Code Not Available	P030016	Event Description: THE REPORTER INDICATED THAT A 12.6MM VICM5_12.6 IMPLANTABLE COLLAMER LENS -8.5 DIOPTER WAS IMPLANTED INTO THE PATIENT'S RIGHT EYE (OD) ON (B)(6) 2022 AS A REPLACEMENT LENS TO ADDRESS LOW VAULT. THE LOW VAULT ISSUE WAS RESOLVED BUT " MILD MYDRIASIS DUE TO SECTORAL ATROPHY OF THE PUPILLARY SPHINCTER " WAS REPORTED FOR STATUS OF THE EYE (SIGNS/SYMPTOMS). ADDITIONAL INFORMATION HAS…	OD	Physician	08/29/2022	2022		Female
https://www.accessdata.fda.gov/scripts/cdrh/cfdocs/cfMAUDE/Detail.CFM?MDRFOI__ID=15555886&pc=MTA	2023826-2022-03513		Malfunction	STAAR SURGICAL COMPANY	2022-10-06 04:00:00	MTA	IMPLANTABLE COLLAMER LENS (ICL)	Adverse Event Without Identified Device or Use Problem	Appropriate Clinical Signs, Symptoms, Conditions Term / Code Not Available	P030016	Event Description: THE REPORTER INDICATED THAT A 13.2MM, VICM5_13.2, -5.50 DIOPTER IMPLANTABLE COLLAMER LENS WAS IMPLANTED INTO THE PATIENTS LEFT EYE (OS) ON (B)(6) 2022 AS A REPLACEMENT LENS TO ADDRESS LOW VAULT. IT WAS REPORTED THAT THE VAULT ISSUE RESOLVED BUT FOR SATUS OF THE EYE (SIGNS/SYMPTOMS) THE REPORTER STATED " PERSISTENT RESIDUAL ASTIGMATISM." ADDITIONAL INFORMATION HAS BEEN REQUESTED…	OS	Physician	09/06/2022	2022		Female
https://www.accessdata.fda.gov/scripts/cdrh/cfdocs/cfMAUDE/Detail.CFM?MDRFOI__ID=12222300&pc=MTA	2023826-2021-02817	2021-06-07 04:00:00	Injury	STAAR SURGICAL COMPANY	2021-07-23 04:00:00	MTA	IMPLANTABLE COLLAMER LENS (ICL)	Adverse Event Without Identified Device or Use Problem; No Apparent Adverse Event	Appropriate Clinical Signs, Symptoms, Conditions Term / Code Not Available	N/A	Event Description: THE REPORTER INDICATED THAT THE SURGEON IMPLANTED A 13.2MM VICM6_13.2 IMPLANTABLE COLLAMER LENS, -6.5 DIOPTER INTO THE PATIENT'S RIGHT EYE (OD). THE SURGEON REPORTS THE PATIENT IS UNHAPPY WITH THE VISUAL OUTCOME. REPORTEDLY, THE LENS REMAINS IMPLANTED. Manufacturer Narrative: B1: UPDATED; B5: UPDATED INFORMATION: ON (B)(6) 2021, THE LENS WAS EXCHANGED WITH A SAME SIZE DIFFERENT…	OD	Physician	06/29/2021	2021	41	Male
https://www.accessdata.fda.gov/scripts/cdrh/cfdocs/cfMAUDE/Detail.CFM?MDRFOI__ID=12457497&pc=MTA	2023826-2021-03549	2021-08-17 04:00:00	Injury	STAAR SURGICAL COMPANY	2021-09-10 04:00:00	MTA	IMPLANTABLE COLLAMER LENS (ICL)	Adverse Event Without Identified Device or Use Problem; No Apparent Adverse Event	Appropriate Clinical Signs, Symptoms, Conditions Term / Code Not Available	N/A	Event Description: THE REPORTER INDICATED THAT THE SURGEON IMPLANTED A 13.2MM VICM5_13.2 IMPLANTABLE COLLAMER LENS, -9.5 DIOPTER INTO THE PATIENT'S RIGHT EYE (OD) ON (B)(6) 2020. THE SURGEON REPORTS IRIS TRANSILLUMINATION DEFECTS. REPORTEDLY, THE LENS REMAINS IMPLANTED AND THE PATIENT IS SATISFIED WITH THEIR VISION; NO OTHER SYMPTOMS. THE CAUSE OF THE EVENT IS REPORTED AS DEVICE. Manufacturer Nar…	OD	Physician	08/19/2021	2021	31	Female
https://www.accessdata.fda.gov/scripts/cdrh/cfdocs/cfMAUDE/Detail.CFM?MDRFOI__ID=13795209&pc=MTA	2023826-2022-00794		Injury	STAAR SURGICAL COMPANY	2022-03-17 04:00:00	MTA	IMPLANTABLE COLLAMER LENS (ICL)	Adverse Event Without Identified Device or Use Problem; No Apparent Adverse Event	Appropriate Clinical Signs, Symptoms, Conditions Term / Code Not Available	NA	Event Description: THE REPORTER INDICATED THE SURGEON IMPLANTED AN ICL IMPLANTABLE COLLAMER LENS INTO THE PATIENTS EYE. THE PATIENT WAS NOT HAPPY WITH HER QUALITY OF VISION AS HER DISTANCE WAS DOWN 2 LINES. THE SURGEON IS PLANNING TO EXPLANT AND EXCHANGE THE LENS. THE LENS REMAINED IMPLANTED. ADDITIONAL INFORMATION HAS BEEN REQUESTED BUT NONE HAS BEEN FORTHCOMING. Manufacturer Narrative: B5- PER …	OS	Physician	02/18/2022	2022		Female
https://www.accessdata.fda.gov/scripts/cdrh/cfdocs/cfMAUDE/Detail.CFM?MDRFOI__ID=11878372&pc=MTA	2023826-2021-01612	2017-06-26	Injury	STAAR SURGICAL COMPANY	2021-05-25	MTA	IMPLANTABLE COLLAMER LENS (ICL)	Inadequacy of Device Shape and/or Size	Appropriate Clinical Signs, Symptoms, Conditions Term / Code Not Available	N/A	Event Description: THE REPORTER INDICATED THAT THE SURGEON IMPLANTED A 13.7MM VICMO13.7, -1700 DIOPTER, IMPLANTABLE COLLAMER LENS INTO THE PATIENT'S LEFT EYE (OS) ON (B)(6) 2017. SIGNIFICANT REDUCTION OF ENDOTHELIAL CELL COUNT OR SIGNIFICANT ENDOTHELIAL CELL LOSS AND EXCESSIVE VAULT WERE OBSERVED. THE LENS REMAINS IMPLANTED. CAUSE OF THE EVENT IS REPORTED AS UNKNOWN. REPORTEDLY, THERE ARE PLANS T…	OS	Physician	05/06/2021	2021	34
https://www.accessdata.fda.gov/scripts/cdrh/cfdocs/cfMAUDE/Detail.CFM?MDRFOI__ID=11405440&pc=MTA	2023826-2021-00554	2020-04-23	Injury	STAAR SURGICAL COMPANY	2021-03-03	MTA	IMPLANTABLE COLLAMER LENS (ICL)	Inadequacy of Device Shape and/or Size	Appropriate Clinical Signs, Symptoms, Conditions Term / Code Not Available	NA#S-P#NA	Event Description: THE REPORTER INDICATED THE SURGEON IMPLANTED A 13.2MM VICMO13.2 IMPLANTABLE COLLAMER LENS, -05.50 DIOPTER, IN THE PATIENTS LEFT EYE (OS), ON (B)(6) 2017. THE LENS WAS EXPLANTED ON (B)(6) 2020 DUE TO EXCESSIVE VAULTING AND SIGNIFICANT REDUCTION OF IRIDO-CORNEAL ANGLES. THE LENS WAS EXCHANGED FOR A SHORTER LENS AND THE PROBLEM WAS RESOLVED. THE CAUSE OF THE EVENT WAS UNKNOWN. Man…	OS	Physician	02/02/2021	2021	42
https://www.accessdata.fda.gov/scripts/cdrh/cfdocs/cfMAUDE/Detail.CFM?MDRFOI__ID=10619476&pc=MTA	2023826-2020-02276	2020-07-13 04:00:00	Injury	STAAR SURGICAL COMPANY	2020-10-02 04:00:00	MTA	IMPLANTABLE COLLAMER LENS (ICL)	Inadequacy of Device Shape and/or Size	Appropriate Clinical Signs, Symptoms, Conditions Term / Code Not Available	N/A	Event Description: THE REPORTER INDICATED THAT A 13.2 MM, VICMO13.2, -15.50 DIOPTER, IMPLANTABLE COLLAMER LENS WAS IMPLANTED INTO THE PATIENTS RIGHT EYE (OD) ON (B)(6) 2020. ON (B)(6) 2020 THE LENS WAS EXCHANGED FOR A SHORTER LENGTH LENS DUE TO EXCESSIVE VAULT AND SIGNIFICANT REDUCTION OF IRIDO-CORNEAL ANGLES. THIS EXCHANGE RESOLVED THE PROBLEM. Manufacturer Narrative: ADDITIONAL INFORMATION: H3-…	OD		09/03/2020	2020	21
https://www.accessdata.fda.gov/scripts/cdrh/cfdocs/cfMAUDE/Detail.CFM?MDRFOI__ID=10639546&pc=MTA	2023826-2020-02304	2020-08-20 04:00:00	Injury	STAAR SURGICAL COMPANY	2020-10-06 04:00:00	MTA	IMPLANTABLE COLLAMER LENS (ICL)	Inadequacy of Device Shape and/or Size	Appropriate Clinical Signs, Symptoms, Conditions Term / Code Not Available	NA	Event Description: THE REPORTER INDICATED THAT A 13.2MM, VICM5_13.2, -11.50 DIOPTER, IMPLANTABLE COLLAMER LENS WAS IMPLANTED INTO THE PATIENTS LEFT EYE (OS) ON (B)(6) 2020. ON (B)(6) 2020 THE LENS WAS EXCHANGED FOR A SHORTER LENGTH LENS DUE TO EXCESSIVE VAULT AND SIGNIFICANT REDUCTION OF IRIDO-CORNEAL ANGLES. THIS EXCHANGE RESOLVED THE PROBLEM. Manufacturer Narrative: H3- DEVICE EVALUATION: LENS …	OS		09/09/2020	2020	30
https://www.accessdata.fda.gov/scripts/cdrh/cfdocs/cfMAUDE/Detail.CFM?MDRFOI__ID=10980484&pc=MTA	2023826-2020-02940	2020-09-13 04:00:00	Injury	STAAR SURGICAL COMPANY	2020-12-09 05:00:00	MTA	IMPLANTABLE COLLAMER LENS (ICL)	Inadequacy of Device Shape and/or Size	Appropriate Clinical Signs, Symptoms, Conditions Term / Code Not Available	N/A	Event Description: THE REPORTER INDICATED THE SURGEON IMPLANTED A 13.2MM VICMO13.2 IMPLANTABLE COLLAMER LENS, DIOPTER -2.75 INTO THE PATIENT'S LEFT EYE (OS) ON (B)(6) 2020. ON (B)(6) 2020 THE LENS WAS EXCHANGED WITH A SHORTER LENS DUE TO EXCESSIVE VAULT AND SIGNIFICANT REDUCTION OF IRIDO-CORNEAL ANGLES (ICA) AND THE PROBLEM WAS RESOLVED. THE CAUSE OF THE EVENT IS REPORTED AS UNKNOWN. Manufacturer…	OS		11/17/2020	2020	30
https://www.accessdata.fda.gov/scripts/cdrh/cfdocs/cfMAUDE/Detail.CFM?MDRFOI__ID=10980525&pc=MTA	2023826-2020-02939	2020-09-13 04:00:00	Injury	STAAR SURGICAL COMPANY	2020-12-09 05:00:00	MTA	IMPLANTABLE COLLAMER LENS (ICL)	Inadequacy of Device Shape and/or Size	Appropriate Clinical Signs, Symptoms, Conditions Term / Code Not Available	N/A	Event Description: THE REPORTER INDICATED THE SURGEON IMPLANTED A 13.2MM VICMO13.2 IMPLANTABLE COLLAMER LENS, DIOPTER -3.0 INTO THE PATIENT'S RIGHT EYE (OD) ON (B)(6) 2020. ON (B)(6) 2020 THE LENS WAS EXCHANGED WITH A SHORTER LENS DUE TO EXCESSIVE VAULT AND SIGNIFICANT REDUCTION OF IRIDO-CORNEAL ANGLES (ICA) AND THE PROBLEM WAS RESOLVED. THE CAUSE OF THE EVENT IS REPORTED AS UNKNOWN. Manufacturer…	OD		11/17/2020	2020	30
https://www.accessdata.fda.gov/scripts/cdrh/cfdocs/cfMAUDE/Detail.CFM?MDRFOI__ID=11405412&pc=MTA	2023826-2021-00553	2020-10-05 04:00:00	Injury	STAAR SURGICAL COMPANY	2021-03-03 05:00:00	MTA	IMPLANTABLE COLLAMER LENS (ICL)	Inadequacy of Device Shape and/or Size	Appropriate Clinical Signs, Symptoms, Conditions Term / Code Not Available	NA#S-P#NA	Event Description: THE REPORTER INDICATED THE SURGEON IMPLANTED A 12.6MM VICMO12.6 IMPLANTABLE COLLAMER LENS, -07.50 DIOPTER, IN THE PATIENTS RIGHT EYE (OD), ON (B)(6) 2020. THE LENS WAS EXPLANTED ON (B)(6) 2020 DUE TO EXCESSIVE VAULTING AND SIGNIFICANT REDUCTION OF IRIDO-CORNEAL ANGLES. THE LENS WAS EXCHANGED FOR A SHORTER LENS AND THE PROBLEM WAS RESOLVED. THE CAUSE OF THE EVENT WAS UNKNOWN. Ma…	OD		02/03/2021	2021	28
https://www.accessdata.fda.gov/scripts/cdrh/cfdocs/cfMAUDE/Detail.CFM?MDRFOI__ID=10989738&pc=MTA	2023826-2020-02967	2020-11-11	Injury	STAAR SURGICAL COMPANY	2020-12-11	MTA	IMPLANTABLE COLLAMER LENS (ICL)	Inadequacy of Device Shape and/or Size	Appropriate Clinical Signs, Symptoms, Conditions Term / Code Not Available	NA	Event Description: THE REPORTER INDICATED THAT A 12.6MM, VICM5_12.6, -7.00 DIOPTER, IMPLANTABLE COLLAMER LENS WAS IMPLANTED INTO THE PATIENTS RIGHT EYE (OD) ON (B)(6) 2020. MEDICAL INTERVENTION (DIAMOX) WAS PRESCRIBED DUE TO HIGH VAULT ONE DAY POST OP. LENS REMAINS IMPLANTED. IT WAS REPORTED THAT PERIPHERAL ANTERIOR CHAMBER IS SHALLOW AND THAT THE DOCTOR WILL MONITOR CLOSELY. IF ADDITIONAL INFORM…	OD	Physician	11/12/2020	2020	26
https://www.accessdata.fda.gov/scripts/cdrh/cfdocs/cfMAUDE/Detail.CFM?MDRFOI__ID=11161162&pc=MTA	2023826-2021-00129	2020-11-21	Malfunction	STAAR SURGICAL COMPANY	2021-01-13	MTA	IMPLANTABLE COLLAMER LENS (ICL)	Inadequacy of Device Shape and/or Size	Appropriate Clinical Signs, Symptoms, Conditions Term / Code Not Available	NA	Event Description: THE REPORTER INDICATED THAT A 13.7MM, VICM5_13.7, -8.00 DIOPTER, IMPLANTABLE COLLAMER LENS WAS IMPLANTED INTO THE PATIENTS LEFT EYE (OS) ON (B)(6) 2020. EXCESSIVE VAULT WAS OBSERVED. FOR STATUS OF THE EYE (SIGNS/SYMPTOMS) THE REPORTER STATED " NORMAL - SHALLOW AC, AC DEPTH PREOPERATIVE 3.87 AC DEPTH POSTOPERATIVE 2.6". ADDITIONAL INFORMATION HAS BEEN REQUESTED BUT NONE HAS BEEN…	OS	Physician	12/14/2020	2020	39
https://www.accessdata.fda.gov/scripts/cdrh/cfdocs/cfMAUDE/Detail.CFM?MDRFOI__ID=12102590&pc=MTA	2023826-2021-02135	2020-11-26	Injury	STAAR SURGICAL COMPANY	2021-07-01	MTA	IMPLANTABLE COLLAMER LENS (ICL)	Inadequacy of Device Shape and/or Size	Appropriate Clinical Signs, Symptoms, Conditions Term / Code Not Available	N/A	Event Description: THE REPORTER INDICATED THAT THE SURGEON IMPLANTED A 13.2MM VICM5 13.2, -07.50 DIOPTER, IMPLANTABLE COLLAMER LENS INTO THE PATIENT'S LEFT EYE (OS) ON (B)(6) 2020. THE LENS WAS REPLACED WITH A SHORTER LENGTH LENS DUE TO EXCESSIVE VAULT AND NARROW ANGLE ON (B)(6)2021. THIS RESOLVED THE PROBLEM. CAUSE OF THE EVENT IS REPORTED AS PATIENT RELATED FACTOR, "BIOLOGIC VARIATION." Manufac…	OS	Physician	06/08/2021	2021	28
https://www.accessdata.fda.gov/scripts/cdrh/cfdocs/cfMAUDE/Detail.CFM?MDRFOI__ID=11556080&pc=MTA	2023826-2021-00746	2020-12-15 05:00:00	Malfunction	STAAR SURGICAL COMPANY	2021-03-23 04:00:00	MTA	IMPLANTABLE COLLAMER LENS (ICL)	Inadequacy of Device Shape and/or Size	Appropriate Clinical Signs, Symptoms, Conditions Term / Code Not Available	NA	Event Description: THE REPORTER INDICATED THE SURGEON INSERTED AND REMOVED A 13.2MM VICMO13.2 IMPLANTABLE COLLAMER LENS, -06.50 DIOPTER, WITHIN THE SAME SURGERY DUE TO EXCESSIVE VAULTING AND SIGNIFICANT REDUCTION OF IRIDO-CORNEAL ANGLES. THE LENS WAS REPLACED DURING THE SAME SURGERY WITH A SHORTER LENS AND THE PROBLEM WAS RESOLVED. CAUSE OF THE EVENT WAS UNKNOWN. Manufacturer Narrative: H3 - DEVI…	NA		03/01/2021	2021	24
https://www.accessdata.fda.gov/scripts/cdrh/cfdocs/cfMAUDE/Detail.CFM?MDRFOI__ID=11722565&pc=MTA	2023826-2021-01210	2021-03-16 04:00:00	Injury	STAAR SURGICAL COMPANY	2021-04-26 04:00:00	MTA	IMPLANTABLE COLLAMER LENS (ICL)	Inadequacy of Device Shape and/or Size	Appropriate Clinical Signs, Symptoms, Conditions Term / Code Not Available	NA	Event Description: THE REPORTER INDICATED THAT A 13.2MM, VICMO13.2, -18.00 DIOPTER, IMPLANTABLE COLLAMER LENS WAS IMPLANTED INTO THE PATIENTS RIGHT EYE (OD) ON (B)(6) 2021. ON (B)(6) 2021 THE LENS WAS EXCHANGED FOR A SHORTER LENGTH LENS DUE TO EXCESSIVE VAULT AND SIGNIFICANT REDUCTION OF IRIDO-CORNEAL ANGLES. THIS EXCHANGE DID NOT RESOLVE THE PROBLEM. Manufacturer Narrative: ADDITIONAL INFORMATIO…	OD	Physician	03/26/2021	2021	39	Male
https://www.accessdata.fda.gov/scripts/cdrh/cfdocs/cfMAUDE/Detail.CFM?MDRFOI__ID=11938943&pc=MTA	2023826-2021-01643	2021-04-06	Injury	STAAR SURGICAL COMPANY	2021-06-04	MTA	IMPLANTABLE COLLAMER LENS (ICL)	Inadequacy of Device Shape and/or Size	Appropriate Clinical Signs, Symptoms, Conditions Term / Code Not Available	N/A	Event Description: THE REPORTER INDICATED THAT THE SURGEON IMPLANTED A 13.2MM VICMO 13.2, -15.00 DIOPTER, IMPLANTABLE COLLAMER LENS INTO THE PATIENT'S LEFT EYE (OS) ON (B)(6) 2021. THE LENS WAS EXCHANGED WITH A SHORTER LENGTH LENS DUE TO SIGNIFICANT REDUCTION OF IRIDO-CORNEAL ANGLES AND EXCESSIVE VAULT ON (B)(6) 2021. THIS RESOLVED THE PROBLEM. CAUSE OF THE EVENT IS REPORTED AS DEVICE, NOT ACCURA…	OS	Physician	05/10/2021	2021	41
https://www.accessdata.fda.gov/scripts/cdrh/cfdocs/cfMAUDE/Detail.CFM?MDRFOI__ID=11938948&pc=MTA	2023826-2021-01642	2021-04-06	Injury	STAAR SURGICAL COMPANY	2021-06-04	MTA	IMPLANTABLE COLLAMER LENS (ICL)	Inadequacy of Device Shape and/or Size	Appropriate Clinical Signs, Symptoms, Conditions Term / Code Not Available	N/A	Event Description: THE REPORTER INDICATED THAT THE SURGEON IMPLANTED A 13.2MM VICM5 13.2, -12.50 DIOPTER, IMPLANTABLE COLLAMER LENS INTO THE PATIENT'S RIGHT EYE (OD) ON (B)(6) 2021. THE LENS WAS EXCHANGED WITH A SHORTER LENGTH LENS DUE TO SIGNIFICANT REDUCTION OF IRIDO-CORNEAL ANGLES AND EXCESSIVE VAULT ON (B)(6) 2021. THIS RESOLVED THE PROBLEM. CAUSE OF THE EVENT IS REPORTED AS DEVICE, NOT ACCUR…	OD	Physician	05/10/2021	2021	41
https://www.accessdata.fda.gov/scripts/cdrh/cfdocs/cfMAUDE/Detail.CFM?MDRFOI__ID=11855169&pc=MTA	2023826-2021-01505	2021-04-06 04:00:00	Injury	STAAR SURGICAL COMPANY	2021-05-20 04:00:00	MTA	IMPLANTABLE COLLAMER LENS (ICL)	Inadequacy of Device Shape and/or Size	Appropriate Clinical Signs, Symptoms, Conditions Term / Code Not Available	N/A	Event Description: THE REPORTER INDICATED THAT THE SURGEON IMPLANTED A 12.6MM VICMO12.6, -09.00 DIOPTER, IMPLANTABLE COLLAMER LENS INTO THE PATIENT'S RIGHT EYE (OD) ON (B)(6) 2021. THE LENS WAS EXPLANTED DUE TO LOW VAULT IN A SECOND SURGERY ON (B)(6) 2021. THIS RESOLVED THE PROBLEM. CAUSE OF THE EVENT IS REPORTED AS UNKNOWN. REPORTEDLY, 'AFTER SURGERY PATIENT'S ARCH WAS TOO HIGH AND TOO LOW." AFT…	OD		04/26/2021	2021	23
https://www.accessdata.fda.gov/scripts/cdrh/cfdocs/cfMAUDE/Detail.CFM?MDRFOI__ID=11855176&pc=MTA	2023826-2021-01506	2021-04-06 04:00:00	Injury	STAAR SURGICAL COMPANY	2021-05-20 04:00:00	MTA	IMPLANTABLE COLLAMER LENS (ICL)	Inadequacy of Device Shape and/or Size	Appropriate Clinical Signs, Symptoms, Conditions Term / Code Not Available	N/A	Event Description: THE REPORTER INDICATED THAT THE SURGEON IMPLANTED A 12.6MM VICMO12.6, -08.50 DIOPTER, IMPLANTABLE COLLAMER LENS INTO THE PATIENT'S LEFT EYE (OS) ON (B)(6) 2021. THE LENS WAS EXPLANTED DUE TO LOW VAULT IN A SECOND SURGERY ON (B)(6) 2021. THIS RESOLVED THE PROBLEM. CAUSE OF THE EVENT IS REPORTED AS UNKNOWN. REPORTEDLY, 'AFTER SURGERY PATIENT'S ARCH WAS TOO HIGH AND TOO LOW." AFTE…	OS		04/26/2021	2021	23
https://www.accessdata.fda.gov/scripts/cdrh/cfdocs/cfMAUDE/Detail.CFM?MDRFOI__ID=12167107&pc=MTA	2023826-2021-02524	2021-05-14	Injury	STAAR SURGICAL COMPANY	2021-07-14	MTA	IMPLANTABLE COLLAMER LENS (ICL)	Inadequacy of Device Shape and/or Size	Appropriate Clinical Signs, Symptoms, Conditions Term / Code Not Available	P030016	Event Description: THE REPORTER INDICATED THAT THE SURGEON IMPLANTED A 13.2MM MICL 13.2, -12.0 DIOPTER, IMPLANTABLE COLLAMER LENS INTO THE PATIENT'S RIGHT EYE (OD) ON (B)(6) 2021. THE LENS WAS REPLACED WITH A SHORTER LENGTH LENS DUE TO SIGNIFICANT REDUCTION OF IRIDO-CORNEAL ANGLES AND EXCESSIVE VAULT ON (B)(6) 2021. THIS RESOLVED THE PROBLEM. CAUSE OF THE EVENT IS REPORTED AS DEVICE, TOO LARGE/LO…	OD	Other Health Care Professional	06/24/2021	2021	32
https://www.accessdata.fda.gov/scripts/cdrh/cfdocs/cfMAUDE/Detail.CFM?MDRFOI__ID=13664247&pc=MTA	2023826-2022-00662	2021-06-01 04:00:00	Injury	STAAR SURGICAL COMPANY	2022-03-03 05:00:00	MTA	IMPLANTABLE COLLAMER LENS (ICL)	Inadequacy of Device Shape and/or Size	Appropriate Clinical Signs, Symptoms, Conditions Term / Code Not Available	N/A	Event Description: THE REPORTER INDICATED THE SURGEON IMPLANTED A 12.6MM VICM5_12.6 IMPLANTABLE COLLAMER LENS, DIOPTER -7.0 INTO THE PATIENT'S RIGHT EYE (OD) ON (B)(6) 2021. ON (B)(6) 2021 THE LENS WAS EXCHANGED WITH A LONGER LENS DUE TO LOW VAULT AND SIGNIFICANT REDUCTION OF IRIDO-CORNEAL ANGLES (ICA). THE PROBLEM WAS RESOLVED. THE CAUSE OF THE EVENT IS REPORTED AS UNKNOWN. Manufacturer Narrativ…	OD	Physician	02/11/2022	2022	30	Female
https://www.accessdata.fda.gov/scripts/cdrh/cfdocs/cfMAUDE/Detail.CFM?MDRFOI__ID=15504589&pc=MTA	2023826-2022-03343	2021-09-09 04:00:00	Injury	STAAR SURGICAL COMPANY	2022-09-29 04:00:00	MTA	IMPLANTABLE COLLAMER LENS (ICL)	Inadequacy of Device Shape and/or Size	Appropriate Clinical Signs, Symptoms, Conditions Term / Code Not Available	P030016	Event Description: THE REPORTER INDICATED THAT A 12.6MM VICM5_12.6 IMPLANTABLE COLLAMER LENS -12.0 DIOPTER WAS IMPLANTED INTO THE PATIENT'S RIGHT EYE (OD) ON (B)(6) 2021. EXCESSIVE VAULT AND ANGLE CLOSURE WITH ELEVATED INTRAOCULAR PRESSURE WAS OBSERVED POST ICL IMPLANTATION. THE LENS WAS EXPLANTED ON THE SAME DATE AS IMPLANTATION BUT IN A DIFFERENT SURGERY. ON (B)(6) 2021 A REPLACEMENT LENS OF SH…	OD	Physician	08/31/2022	2022	37	Male
https://www.accessdata.fda.gov/scripts/cdrh/cfdocs/cfMAUDE/Detail.CFM?MDRFOI__ID=12599725&pc=MTA	2023826-2021-03916	2021-09-10 04:00:00	Injury	STAAR SURGICAL COMPANY	2021-10-08 04:00:00	MTA	IMPLANTABLE COLLAMER LENS (ICL)	Inadequacy of Device Shape and/or Size	Appropriate Clinical Signs, Symptoms, Conditions Term / Code Not Available	N/A	Event Description: THE REPORTER INDICATED THE SURGEON IMPLANTED A 13.2MM VICMO13.2 IMPLANTABLE COLLAMER LENS, DIOPTER -9.5 INTO THE PATIENT'S LEFT EYE (OS) ON (B)(6) 2020. THE SURGEON REPORTS LOW VAULT AND PIGMENT DISPERSION. REPORTEDLY, "THE REFRACTIVE RESULT HAS BEEN ACHIEVED. DURING THE NEXT CONTROL OBSERVATION IT WAS NOTED THAT THE LENS HAS DROPPED AND THE VAULT IS A CRITICAL MARK OF 120UM. I…	OS	Physician	09/15/2021	2021	30	Female
https://www.accessdata.fda.gov/scripts/cdrh/cfdocs/cfMAUDE/Detail.CFM?MDRFOI__ID=12599739&pc=MTA	2023826-2021-03915	2021-09-10 04:00:00	Injury	STAAR SURGICAL COMPANY	2021-10-08 04:00:00	MTA	IMPLANTABLE COLLAMER LENS (ICL)	Inadequacy of Device Shape and/or Size	Appropriate Clinical Signs, Symptoms, Conditions Term / Code Not Available	N/A	Event Description: THE REPORTER INDICATED THE SURGEON IMPLANTED A 13.2MM VICMO13.2 IMPLANTABLE COLLAMER LENS, DIOPTER -9.0 INTO THE PATIENT'S RIGHT EYE (OD) ON (B)(6) 2020. THE SURGEON REPORTS LOW VAULT AND PIGMENT DISPERSION. REPORTEDLY, "THE REFRACTIVE RESULT HAS BEEN ACHIEVED. DURING THE NEXT CONTROL OBSERVATION IT WAS NOTED THAT THE LENS HAS DROPPED AND THE VAULT IS A CRITICAL MARK OF 105UM. …	OD	Physician	09/15/2021	2021	30	Female
https://www.accessdata.fda.gov/scripts/cdrh/cfdocs/cfMAUDE/Detail.CFM?MDRFOI__ID=12716124&pc=MTA	2023826-2021-04134	2021-09-14	Injury	STAAR SURGICAL COMPANY	2021-10-28	MTA	IMPLANTABLE COLLAMER LENS (ICL)	Inadequacy of Device Shape and/or Size	Appropriate Clinical Signs, Symptoms, Conditions Term / Code Not Available	NA	Event Description: THE REPORTER INDICATED THE SURGEON IMPLANTED A 13.2MM VICM5_13.2 IMPLANTABLE COLLAMER LENS, -06.50 DIOPTER, INTO THE PATIENTS LEFT EYE (OS) ON (B)(6) 2021. THE LENS WAS EXPLANTED ON (B)(6) 2021 DUE TO EXCESSIVE VAULTING AND SIGNIFICANT REDUCTION OF IRIDO-CORNEAL ANGLES. THE LENS WAS REPLACED WITH A SHORTER LENS AND THE PROBLEM WAS RESOLVED. Manufacturer Narrative: WEIGHT: UNK. …	OS	Physician	09/29/2021	2021	29
https://www.accessdata.fda.gov/scripts/cdrh/cfdocs/cfMAUDE/Detail.CFM?MDRFOI__ID=12619778&pc=MTA	2023826-2021-03984	2021-09-24	Injury	STAAR SURGICAL COMPANY	2021-10-12	MTA	IMPLANTABLE COLLAMER LENS (ICL)	Inadequacy of Device Shape and/or Size	Appropriate Clinical Signs, Symptoms, Conditions Term / Code Not Available	P030016	Event Description: THE REPORTER INDICATED THE SURGEON IMPLANTED A 13.2MM MICL13.2 IMPLANTABLE COLLAMER LENS, -08.50 DIOPTER, IN THE PATIENTS RIGHT EYE (OD) ON (B)(6) 2021. THE LENS WAS EXPLANTED ON (B)(6) 2021 DUE TO EXCESSIVE VAULTING AND ANGLE CLOSURE. THE LENS WAS REPLACED WITH A SHORTER LENS AND THE PROBLEM WAS RESOLVED. Manufacturer Narrative: WEIGHT - UNK. ETHNICITY - UNK. RACE - UNK. (B)(4…	OD	Other Health Care Professional	09/24/2021	2021	44
https://www.accessdata.fda.gov/scripts/cdrh/cfdocs/cfMAUDE/Detail.CFM?MDRFOI__ID=13442385&pc=MTA	2023826-2022-00315	2021-10-23 04:00:00	Injury	STAAR SURGICAL COMPANY	2022-02-03 05:00:00	MTA	IMPLANTABLE COLLAMER LENS (ICL)	Inadequacy of Device Shape and/or Size	Appropriate Clinical Signs, Symptoms, Conditions Term / Code Not Available	NA	Event Description: THE REPORTER INDICATED THAT A 12.6MM VICMO 12.6IMPLANTABLE COLLAMER LENS OF -6.5 DIOPTER WAS IMPLANTED INTO THE PATIENTS RIGHT EYE (OD) ON (B)(6) 2021. ON (B)(6) 2021 THE LENS WAS EXCHANGED FOR A SHORTER LENGTH LENS DUE TO EXCESSIVE VAULT AND SIGNIFICANT REDUCTION OF CORNEAL ANGLES. THE EXCHANGE RESOLVED THE PROBLEM. "DURING THE OPERATION, THE DOCTOR USED THE OPERATING MICROSCO…	OD	Physician	01/10/2022	2022	33	Female
https://www.accessdata.fda.gov/scripts/cdrh/cfdocs/cfMAUDE/Detail.CFM?MDRFOI__ID=13006620&pc=MTA	2023826-2021-04885	2021-11-02 04:00:00	Malfunction	STAAR SURGICAL COMPANY	2021-12-14 05:00:00	MTA	IMPLANTABLE COLLAMER LENS (ICL)	Inadequacy of Device Shape and/or Size	Appropriate Clinical Signs, Symptoms, Conditions Term / Code Not Available		Event Description: THE REPORTER INDICATED THAT THE SURGEON IMPLANTED A 13.7MM VICM5_13.7; -2.50 DIOPTER IMPLANTABLE COLLAMER LENS INTO THE PATIENT'S RIGHT EYE (OD) ON (B)(6) 2021. INTRAOPERATIVELY IT WAS REMOVED DUE TO EXCESSIVE VAULTING. ON THE SAME DATE A REPLACEMENT LENS OF SHORTER LENGTHS WAS IMPLANTED. POSTOP RESULTS NOTED "MINOR VOLCANO EFFECT BUT CHAMBER IS DEEP". CAUSE OF THE EVENT WAS RE…	OD	Physician	11/18/2021	2021	27
https://www.accessdata.fda.gov/scripts/cdrh/cfdocs/cfMAUDE/Detail.CFM?MDRFOI__ID=14030248&pc=MTA	2023826-2022-01090	2021-11-10 05:00:00	Injury	STAAR SURGICAL COMPANY	2022-04-06 04:00:00	MTA	IMPLANTABLE COLLAMER LENS (ICL)	Inadequacy of Device Shape and/or Size	Appropriate Clinical Signs, Symptoms, Conditions Term / Code Not Available	NA	Event Description: THE REPORTER INDICATED THE SURGEON IMPLANTED A 13.7MM VICMO13.7 IMPLANTABLE COLLAMER LENS, -10.50 DIOPTER, IN THE PATIENTS LEFT EYE (OS). THE LENS WAS EXPLANTED DUE TO EXCESSIVE VAULTING AND SIGNIFICANT REDUCTION OF IRIDO-CORNEAL ANGLES (THE PATIENT DID NOT HAVE THE EXPECTED RESULT). THE LENS WAS REPLACED WITH A SMALLER SIZE LENS (12.1) WITH THE SAME DIOPTER. THE CAUSE OF THE E…	OS	Physician	03/18/2022	2022	29	Female
https://www.accessdata.fda.gov/scripts/cdrh/cfdocs/cfMAUDE/Detail.CFM?MDRFOI__ID=13082670&pc=MTA	2023826-2021-04922	2021-12-15 05:00:00	Injury	STAAR SURGICAL COMPANY	2021-12-23 05:00:00	MTA	IMPLANTABLE COLLAMER LENS (ICL)	Inadequacy of Device Shape and/or Size	Appropriate Clinical Signs, Symptoms, Conditions Term / Code Not Available	NA	Event Description: THE REPORTER INDICATED THE SURGEON IMPLANTED A 13.2MM IMPLANTABLE COLLAMER LENS INTO THE PATIENTS EYE. THE LENS WAS REPORTED AS EXCESSIVE VAULTING, WITH NARROW ANGLES AND REMAINED IMPLANTED. ADDITIONAL INFORMATION HAS BEEN REQUESTED BUT NONE HAS BEEN FORTHCOMING. Manufacturer Narrative: THIS PRODUCT IS MANUFACTURED IN THE U.S. BUT NOT MARKETED IN THE U.S. CLAIM # (B)(4). Manufa…	OD	Other	11/29/2021	2021	33	Female
https://www.accessdata.fda.gov/scripts/cdrh/cfdocs/cfMAUDE/Detail.CFM?MDRFOI__ID=14639226&pc=MTA	2023826-2022-01791	2021-12-28 05:00:00	Injury	STAAR SURGICAL COMPANY	2022-06-08 04:00:00	MTA	IMPLANTABLE COLLAMER LENS (ICL)	Inadequacy of Device Shape and/or Size	Appropriate Clinical Signs, Symptoms, Conditions Term / Code Not Available	P030016	Event Description: THE REPORTER INDICATED THE SURGEON IMPLANTED A 13.2MM VICM5_13.2 IMPLANTABLE COLLAMER LENS, -10.50 DIOPTER, INTO THE PATIENTS RIGHT EYE (OD) ON (B)(6) 2021. THE LENS WAS EXPLANTED ON (B)(6) 2022 DUE TO LOW VAULTING AND PERMANENT LOSS OF BCVA. THE LENS WAS REPLACED WIH A LONGER LENS AND THE PROBLEM WAS RESOLVED. Manufacturer Narrative: (B)(4). CLAIM # (B)(4).	OD	Physician	05/12/2022	2022	41	Female
https://www.accessdata.fda.gov/scripts/cdrh/cfdocs/cfMAUDE/Detail.CFM?MDRFOI__ID=14647871&pc=MTA	2023826-2022-01792	2021-12-29 05:00:00	Injury	STAAR SURGICAL COMPANY	2022-06-09 04:00:00	MTA	IMPLANTABLE COLLAMER LENS (ICL)	Inadequacy of Device Shape and/or Size	Appropriate Clinical Signs, Symptoms, Conditions Term / Code Not Available	P030016	Event Description: THE REPORTER INDICATED THE SURGEON IMPLANTED A 13.2MM VICM5_13.2 IMPLANTABLE COLLAMER LENS, -10.50 DIOPTER, INTO THE PATIENTS LEFT EYE (OS) ON (B)(6) 2021. THE LENS WAS EXPLANTED ON (B)(6) 2022 DUE TO LOW VAULTING AND PERMANENT LOSS OF BCVA. THE LENS WAS REPLACED WITH A LONGER LENS AND THE PROBLEM WAS RESOLVED. Manufacturer Narrative: (B)(4). CLAIM # (B)(4).	OS	Physician	05/12/2022	2022	41	Female
https://www.accessdata.fda.gov/scripts/cdrh/cfdocs/cfMAUDE/Detail.CFM?MDRFOI__ID=13553238&pc=MTA	2023826-2022-00539	2022-02-02 05:00:00	Injury	STAAR SURGICAL COMPANY	2022-02-17 05:00:00	MTA	IMPLANTABLE COLLAMER LENS (ICL)	Inadequacy of Device Shape and/or Size	Appropriate Clinical Signs, Symptoms, Conditions Term / Code Not Available		Event Description: THE REPORTER INDICATED THAT THE SURGEON IMPLANTED A 13.7MM VICM5_13.7; -2.75 DIOPTER IMPLANTABLE COLLAMER LENS INTO THE PATIENT'S RIGHT EYE (OD) ON (B)(6) 2022. THE PATIENT EXPERIENCED EXCESSIVE VAULTING AND SIGNIFICANT REDUCTION OF IRIDO-CORNEAL ANGLES. ON (B)(6) 2022 THE LENS WAS EXCHANGED WITH A SHORTER LENGTH LENS AND THIS RESOLVED THE PROBLEM. THE CAUSE OF THE EVENT WAS RE…	OD	Physician	02/10/2022	2022	27	Female
https://www.accessdata.fda.gov/scripts/cdrh/cfdocs/cfMAUDE/Detail.CFM?MDRFOI__ID=13553240&pc=MTA	2023826-2022-00540	2022-02-02 05:00:00	Injury	STAAR SURGICAL COMPANY	2022-02-17 05:00:00	MTA	IMPLANTABLE COLLAMER LENS (ICL)	Inadequacy of Device Shape and/or Size	Appropriate Clinical Signs, Symptoms, Conditions Term / Code Not Available		Event Description: THE REPORTER INDICATED THAT THE SURGEON IMPLANTED A 13.7MM VICM5_13.7; -2.25 DIOPTER IMPLANTABLE COLLAMER LENS INTO THE PATIENT'S LEFT EYE (OS) ON (B)(6) 2022. THE PATIENT EXPERIENCED EXCESSIVE VAULTING AND SIGNIFICANT REDUCTION OF IRIDO-CORNEAL ANGLES. ON (B)(6) 2022 THE LENS WAS EXCHANGED WITH A SHORTER LENGTH LENS AND THIS RESOLVED THE PROBLEM. THE CAUSE OF THE EVENT WAS REP…	OS	Physician	02/10/2022	2022	27	Female
https://www.accessdata.fda.gov/scripts/cdrh/cfdocs/cfMAUDE/Detail.CFM?MDRFOI__ID=13726657&pc=MTA	2023826-2022-00757	2022-02-14 05:00:00	Injury	STAAR SURGICAL COMPANY	2022-03-10 05:00:00	MTA	IMPLANTABLE COLLAMER LENS (ICL)	Inadequacy of Device Shape and/or Size	Appropriate Clinical Signs, Symptoms, Conditions Term / Code Not Available	NA	Event Description: THE REPORTER INDICATED THE SURGEON IMPLANTED A 13.2MM VICM5_13.2 IMPLANTABLE COLLAMER LENS, -04.50 DIOPTER INTO THE PATIENTS LEFT EYE (OS) ON (B)(6) 2021. THE LENS WAS EXPLANTED ON (B)(6) 2022 DUE TO EXCESSIVE VAULTING AND VARIATION IN ELEVATED INTRAOCULAR PRESSURE (IOP) (NO ELEVATED IOP PEAKS MEASURABLE). THE LENS WAS REPLACED WITH A SHORTER LENS. THE CAUSE OF THE EVENT WAS UN…	OS	Physician	02/15/2022	2022	30	Female
https://www.accessdata.fda.gov/scripts/cdrh/cfdocs/cfMAUDE/Detail.CFM?MDRFOI__ID=13796099&pc=MTA	2023826-2022-00785	2022-02-15 05:00:00	Injury	STAAR SURGICAL COMPANY	2022-03-17 04:00:00	MTA	IMPLANTABLE COLLAMER LENS (ICL)	Inadequacy of Device Shape and/or Size	Appropriate Clinical Signs, Symptoms, Conditions Term / Code Not Available		Event Description: THE REPORTER INDICATED THAT A 13.2MM VICM5 13.2 IMPLANTABLE COLLAMER LENS OF -5.50 DIOPTER WAS IMPLANTED INTO THE PATIENT'S LEFT EYE (OS) ON (B)(6)2020. EXCESSIVE VAULT AND SIGNIFICANT REDUCTION OF ENDOTHELIAL CELL COUNT OR SIGNIFICANT ENDOTHELIAL CELL LOSS WAS OBSERVED. ON (B)(6)2022 THE LENS WAS REPOSITIONED TO VERTICAL ORIENTATION AND THE PROBLEM WAS RESOLVED FOR VAULT. "(EC…	OS	Physician	02/15/2022	2022	33	Female
https://www.accessdata.fda.gov/scripts/cdrh/cfdocs/cfMAUDE/Detail.CFM?MDRFOI__ID=14287983&pc=MTA	2023826-2022-01305	2022-04-07 04:00:00	Malfunction	STAAR SURGICAL COMPANY	2022-05-05 04:00:00	MTA	IMPLANTABLE COLLAMER LENS (ICL)	Inadequacy of Device Shape and/or Size	Appropriate Clinical Signs, Symptoms, Conditions Term / Code Not Available	NA	Event Description: THE REPORTER INDICATED THE SURGEON IMPLANTED A 13.2MM VICM13.2 IMPLANTABLE COLLAMER LENS, -08.00 DIOPTER INTO THE PATIENTS RIGHT EYE (OD). THE LENS WAS REPORTED AS LOW VAULTING AND REFRACTIVE CHANGE OVERTIME. THE LENS REMAINED IMPLANTED. THE CAUSE OF THE EVENT WAS UNKNOWN. ADDITIONAL INFORMATION HAS BEEN REQUESTED BUT NONE HAS BEEN FORTHCOMING. Manufacturer Narrative: ADDITIONA…	OD	Physician	04/08/2022	2022	35	Female
https://www.accessdata.fda.gov/scripts/cdrh/cfdocs/cfMAUDE/Detail.CFM?MDRFOI__ID=14292696&pc=MTA	2023826-2022-01306	2022-04-07 04:00:00	Malfunction	STAAR SURGICAL COMPANY	2022-05-05 04:00:00	MTA	IMPLANTABLE COLLAMER LENS (ICL)	Inadequacy of Device Shape and/or Size	Appropriate Clinical Signs, Symptoms, Conditions Term / Code Not Available	NA	Event Description: THE REPORTER INDICATED THE SURGEON IMPLANTED A 12.5MM ICM125V4 IMPLANTABLE COLLAMER LENS, -12.50 DIOPTER INTO THE PATIENTS LEFT EYE (OS). THE LENS WAS REPORTED AS LOW VAULTING AND REFRACTIVE CHANGE OVERTIME. THE LENS REMAINED IMPLANTED. THE CAUSE OF THE EVENT WAS UNKNOWN. ADDITIONAL INFORMATION HAS BEEN REQUESTED BUT NONE HAS BEEN FORTHCOMING. Manufacturer Narrative: ADDITIONAL…	OS	Physician	04/08/2022	2022	35	Female
https://www.accessdata.fda.gov/scripts/cdrh/cfdocs/cfMAUDE/Detail.CFM?MDRFOI__ID=14985565&pc=MTA	2023826-2022-02143	2022-05-27 04:00:00	Injury	STAAR SURGICAL COMPANY	2022-07-12 04:00:00	MTA	IMPLANTABLE COLLAMER LENS (ICL)	Inadequacy of Device Shape and/or Size	Appropriate Clinical Signs, Symptoms, Conditions Term / Code Not Available	P030016	Event Description: THE REPORTER INDICATED THAT THE SURGEON IMPLANTED A 12.6MM VICM5 12.6, -9.00 DIOPTER, IMPLANTABLE COLLAMER LENS INTO THE PATIENT'S RIGHT EYE (OD) ON (B)(6) 2022. THE LENS WAS REPLACED WITH A SHORTER LENGTH LENS DUE TO SIGNIFICANT REDUCTION OF IRIDO-CORNEAL ANGLES AND EXCESSIVE VAULT ON (B)(6) 2022. THIS RESOLVED THE PROBLEM. CAUSE OF THE EVENT IS REPORTED AS UNKNOWN. Manufactur…	OD	Physician	06/24/2022	2022	38	Female
https://www.accessdata.fda.gov/scripts/cdrh/cfdocs/cfMAUDE/Detail.CFM?MDRFOI__ID=15010000&pc=MTA	2023826-2022-02231	2022-06-08 04:00:00	Injury	STAAR SURGICAL COMPANY	2022-07-14 04:00:00	MTA	IMPLANTABLE COLLAMER LENS (ICL)	Inadequacy of Device Shape and/or Size	Appropriate Clinical Signs, Symptoms, Conditions Term / Code Not Available	P030016	Event Description: THE REPORTER INDICATED THAT A 13.7MM VICMO13.7 IMPLANTABLE COLLAMER LENS OF -4.00 DIOPTER WAS IMPLANTED INTO THE PATIENT'S RIGHT EYE (OD) ON (B)(6) 2022. ON (B)(6) 2022 THE LENS WAS EXCHANGED WITH A SHORTER LENGTH LENS DUE TO EXCESSIVE VAULT AND SIGNIFICANT REDUCTION OF IRIDOCORNEAL ANGLES. THE EXCHANGE RESOLVED THE PROBLEM. "OVERSIZE LENS" WAS REPORTED FOR CAUSE DETAILS. Manuf…	OD	Physician	06/16/2022	2022	23	Female
https://www.accessdata.fda.gov/scripts/cdrh/cfdocs/cfMAUDE/Detail.CFM?MDRFOI__ID=15010097&pc=MTA	2023826-2022-02232	2022-06-08 04:00:00	Injury	STAAR SURGICAL COMPANY	2022-07-14 04:00:00	MTA	IMPLANTABLE COLLAMER LENS (ICL)	Inadequacy of Device Shape and/or Size	Appropriate Clinical Signs, Symptoms, Conditions Term / Code Not Available	P030016	Event Description: THE REPORTER INDICATED THAT A 13.7MM VICMO13.7 IMPLANTABLE COLLAMER LENS OF -4.50 DIOPTER WAS IMPLANTED INTO THE PATIENT'S LEFT EYE (OS) ON (B)(6) 2022. ON (B)(6) 2022 THE LENS WAS EXCHANGED WITH A SHORTER LENGTH LENS DUE TO EXCESSIVE VAULT AND SIGNIFICANT REDUCTION OF IRIDOCORNEAL ANGLES. THE EXCHANGE RESOLVED THE PROBLEM. " OVERSIZE LENS" WAS REPORTED FOR CAUSE DETAILS. Manuf…	OS	Physician	06/16/2022	2022	23	Female
https://www.accessdata.fda.gov/scripts/cdrh/cfdocs/cfMAUDE/Detail.CFM?MDRFOI__ID=15135244&pc=MTA	2023826-2022-02454	2022-06-08 04:00:00	Malfunction	STAAR SURGICAL COMPANY	2022-07-29 04:00:00	MTA	IMPLANTABLE COLLAMER LENS (ICL)	Inadequacy of Device Shape and/or Size	Appropriate Clinical Signs, Symptoms, Conditions Term / Code Not Available	NA	Event Description: THE REPORTER INDICATED THAT A 13.2MM VICM5_13.2 IMPLANTABLE COLLAMER LENS OF -7.00 DIOPTER WAS IMPLANTED INTO THE PATIENT'S LEFT EYE (OS) ON (B)(6) 2022. EXCESSIVE VAULT AND NARROW ANGLES WAS OBSERVED, LENS REMAINS IMPLANTED. IT WAS REPORTED THAT THE DEVICE DID NOT FAIL TO PERFORM AS INTENDED. IF ADDITIONAL INFORMATION IS RECEIVED A SUPPLEMENTAL MEDWATCH REPORT WILL BE SUBMITTE…	OS	Physician	07/01/2022	2022	45	Female
https://www.accessdata.fda.gov/scripts/cdrh/cfdocs/cfMAUDE/Detail.CFM?MDRFOI__ID=15583834&pc=MTA	2023826-2022-03523	2022-08-18 04:00:00	Injury	STAAR SURGICAL COMPANY	2022-10-11 04:00:00	MTA	IMPLANTABLE COLLAMER LENS (ICL)	Inadequacy of Device Shape and/or Size	Appropriate Clinical Signs, Symptoms, Conditions Term / Code Not Available	P030016	Event Description: THE REPORTER INDICATED THAT A 13.2MM VICMO 13.2 IMPLANTABLE COLLAMER LENS OF -12.0 DIOPTER WAS IMPLANTED INTO THE PATIENT'S LEFT EYE (OS) ON (B)(6) 2022. ON (B)(6) 2022 THE LENS WAS EXPLANTED AND A SHORTER LENS WAS IMPLANTED DUE TO SHALLOW AC AND EXCESSIVE VAULT. THE REPLACEMENT LENS RESOLVED THE PROBLEM. CAUSE REPORTED AS DEVICE AND PATIENT RELATED FACTOR. Manufacturer Narrati…	OS	Physician	09/12/2022	2022	31	Female
https://www.accessdata.fda.gov/scripts/cdrh/cfdocs/cfMAUDE/Detail.CFM?MDRFOI__ID=15584122&pc=MTA	2023826-2022-03522	2022-08-18 04:00:00	Injury	STAAR SURGICAL COMPANY	2022-10-11 04:00:00	MTA	IMPLANTABLE COLLAMER LENS (ICL)	Inadequacy of Device Shape and/or Size	Appropriate Clinical Signs, Symptoms, Conditions Term / Code Not Available	P030016	Event Description: THE REPORTER INDICATED THAT A 13.2MM VICMO 13.2 IMPLANTABLE COLLAMER LENS OF -17.0 DIOPTER WAS IMPLANTED INTO THE PATIENT'S RIGHT EYE (OD) ON (B)(6) 2022. ON (B)(6) 2022 THE LENS WAS EXPLANTED AND A SHORTER LENS WAS IMPLANTED DUE TO SHALLOW AC AND EXCESSIVE VAULT. THE REPLACEMENT LENS RESOLVED THE PROBLEM. CAUSE REPORTED AS DEVICE AND PATIENT RELATED FACTOR. Manufacturer Narrat…	OD	Physician	09/12/2022	2022	31	Female
https://www.accessdata.fda.gov/scripts/cdrh/cfdocs/cfMAUDE/Detail.CFM?MDRFOI__ID=16620686&pc=MTA	2023826-2023-01029	2022-10-05 04:00:00	Injury	STAAR SURGICAL COMPANY	2023-03-27 04:00:00	MTA	IMPLANTABLE COLLAMER LENS (ICL)	Inadequacy of Device Shape and/or Size	Appropriate Clinical Signs, Symptoms, Conditions Term / Code Not Available	P030016	Event Description: THE REPORTER INDICATED THAT THE SURGEON IMPLANTED A 12.1MM VICM5 12.1, -09.00 DIOPTER, IMPLANTABLE COLLAMER LENS INTO THE PATIENT'S RIGHT EYE (OD) ON (B)(6) 2022. THE LENS WAS EXPLANTED ON (B)(6) 2022 DUE TO LOW VAULT. A LONGER LENGTH LENS WAS IMPLANTED ON 05/OCT/2022. THIS RESOLVED THE PROBLEM. CAUSE OF THE EVENT IS REPORTED AS UNKNOWN. Manufacturer Narrative: (B)(4).	OD	Physician	03/09/2022	2022	45	Male
https://www.accessdata.fda.gov/scripts/cdrh/cfdocs/cfMAUDE/Detail.CFM?MDRFOI__ID=16877955&pc=MTA	2023826-2023-01617	2022-10-12 04:00:00	Malfunction	STAAR SURGICAL COMPANY	2023-05-05 04:00:00	MTA	IMPLANTABLE COLLAMER LENS (ICL)	Inadequacy of Device Shape and/or Size	Appropriate Clinical Signs, Symptoms, Conditions Term / Code Not Available	P030016	Event Description: THE REPORTER INDICATED THAT A 13.7MM VICM5_13.7 IMPLANTABLE COLLAMER LENS OF -13.00 DIOPTER WAS IMPLANTED INTO THE PATIENT'S LEFT EYE (OS) ON (B)(6) 2022. EXCESSIVE VAULT AND SIGNIFICANT REDUCTION OF IRIDOCORNEAL ANGLES WAS OBSERVED. THE LENS REMAINS IMPLANTED. IF ADDITIONAL INFORMATION IS RECEIVED A SUPPLEMENTAL MEDWATCH REPORT WILL BE SUBMITTED. Manufacturer Narrative: H6- HE…	OS	Physician	04/05/2023	2023	21	Male
https://www.accessdata.fda.gov/scripts/cdrh/cfdocs/cfMAUDE/Detail.CFM?MDRFOI__ID=16877979&pc=MTA	2023826-2023-01616	2022-10-12 04:00:00	Malfunction	STAAR SURGICAL COMPANY	2023-05-05 04:00:00	MTA	IMPLANTABLE COLLAMER LENS (ICL)	Inadequacy of Device Shape and/or Size	Appropriate Clinical Signs, Symptoms, Conditions Term / Code Not Available	P030016	Event Description: THE REPORTER INDICATED THAT A 13.7MM VICM5_13.7 IMPLANTABLE COLLAMER LENS OF -13.00 DIOPTER WAS IMPLANTED INTO THE PATIENT'S RIGHT EYE (OD) ON (B)(6) 2022. EXCESSIVE VAULT AND SIGNIFICANT REDUCTION OF IRIDOCORNEAL ANGLES WAS OBSERVED. THE LENS REMAINS IMPLANTED. IF ADDITIONAL INFORMATION IS RECEIVED A SUPPLEMENTAL MEDWATCH REPORT WILL BE SUBMITTED. Manufacturer Narrative: H6- H…	OD	Physician	04/05/2023	2023	21	Male
https://www.accessdata.fda.gov/scripts/cdrh/cfdocs/cfMAUDE/Detail.CFM?MDRFOI__ID=15830802&pc=MTA	2023826-2022-04016	2022-10-14 04:00:00	Injury	STAAR SURGICAL COMPANY	2022-11-19 05:00:00	MTA	IMPLANTABLE COLLAMER LENS (ICL)	Inadequacy of Device Shape and/or Size	Appropriate Clinical Signs, Symptoms, Conditions Term / Code Not Available	P030016	Event Description: THE REPORTER INDICATED THAT THE SURGEON IMPLANTED A 13.7MM VICM5 13.7 IMPLANTABLE COLLAMER LENS OF -5.0 DIOPTER WAS IMPLANTED INTO THE PATIENTS RIGHT EYE (OD) ON (B)(6) 2022. EXCESSIVE VAULT WAS OBSERVED WITH SIGNIFICANT REDUCTION OF IRIDOCORNEAL ANGLES. ON (B)(6) 2022 THE LENS WAS EXPLANTED AND ON THE SAME DAY DIFFERENT SURGERY A REPLACEMENT OF SHORTER LENGTH WAS IMPLANTED AND…	OD	Physician	10/19/2022	2022		Female
https://www.accessdata.fda.gov/scripts/cdrh/cfdocs/cfMAUDE/Detail.CFM?MDRFOI__ID=15759256&pc=MTA	2023826-2022-03827	2022-10-20 04:00:00	Malfunction	STAAR SURGICAL COMPANY	2022-11-09 05:00:00	MTA	IMPLANTABLE COLLAMER LENS (ICL)	Inadequacy of Device Shape and/or Size	Appropriate Clinical Signs, Symptoms, Conditions Term / Code Not Available	P030016	Event Description: THE REPORTER INDICATED THAT A 13.2MM VICM513.2, -10.00 DIOPTER, IMPLANTABLE COLLAMER LENS WAS IMPLANTED, REMOVED, AND REPLACED INTRAOPERATIVELY WITH A SHORTER LENGTH LENS ON (B)(6) 2022 FROM PATIENT'S RIGHT EYE (OD) DUE TO EXCESSIVE VAULT.THIS RESOLVED THE PROBLEM. Manufacturer Narrative: RACE- UNK. ETHNICITY - UNK. WEIGHT - UNK. CLAIM# (B)(4).	OD	Physician	10/21/2022	2022	24	Female
https://www.accessdata.fda.gov/scripts/cdrh/cfdocs/cfMAUDE/Detail.CFM?MDRFOI__ID=16035511&pc=MTA	2023826-2022-04577	2022-11-02 04:00:00	Injury	STAAR SURGICAL COMPANY	2022-12-22 05:00:00	MTA	IMPLANTABLE COLLAMER LENS (ICL)	Inadequacy of Device Shape and/or Size	Appropriate Clinical Signs, Symptoms, Conditions Term / Code Not Available	P030016	Event Description: THE REPORTER INDICATED THAT THE SURGEON IMPLANTED A 12.1MM VICM5_12.1, -5.50 DIOPTER, IMPLANTABLE COLLAMER LENS INTO THE PATIENT'S LEFT EYE (OS) ON (B)(6) 2022. THE LENS WAS EXPLANTED ON (B)(6) 2022 DUE TO LOW VAULT. IN A SECOND SURGERY ON (B)(6) 2022 A LONGER LENGTH LENS WAS IMPLANTED. THIS RESOLVED THE PROBLEM. CAUSE OF THE EVENT IS REPORTED AS UNKNOWN. Manufacturer Narrative…	OS	Physician	12/02/2022	2022	41	Female
https://www.accessdata.fda.gov/scripts/cdrh/cfdocs/cfMAUDE/Detail.CFM?MDRFOI__ID=16330310&pc=MTA	2023826-2023-00473	2022-11-05 04:00:00	Injury	STAAR SURGICAL COMPANY	2023-02-08 05:00:00	MTA	IMPLANTABLE COLLAMER LENS (ICL)	Inadequacy of Device Shape and/or Size	Appropriate Clinical Signs, Symptoms, Conditions Term / Code Not Available	P030016	Event Description: THE REPORTER INDICATED THAT THE SURGEON IMPLANTED A 12.6MM VICMO12.6; -6.5 DIOPTER IMPLANTABLE COLLAMER LENS INTO THE PATIENT'S RIGHT EYE (OD) ON (B)(6) 2022 AS A REPLACEMENT LENS TO A PREVIOUS ISSUE. THE SURGEON NOTED "PRO2H; VOMIT; THERE IS EXUDATIVE MEMBRANE IN THE POSTERIOR CHAMBER". ON THIS SAME DATE THE LENS WAS EXPLANTED IN A SECOND SURGERY AND IT WAS NOTED "PATIENT FEEL…	OD	Physician	01/29/2023	2023	29	Female
https://www.accessdata.fda.gov/scripts/cdrh/cfdocs/cfMAUDE/Detail.CFM?MDRFOI__ID=15991899&pc=MTA	2023826-2022-04413	2022-11-11 05:00:00	Injury	STAAR SURGICAL COMPANY	2022-12-15 05:00:00	MTA	IMPLANTABLE COLLAMER LENS (ICL)	Inadequacy of Device Shape and/or Size	Appropriate Clinical Signs, Symptoms, Conditions Term / Code Not Available	P030016	Event Description: THE REPORTER INDICATED THAT A 13.2MM VICM5 13.2 IMPLANTABLE COLLAMER LENS OF -9.00 DIOPTER WAS IMPLANTED INTO THE LEFT EYE (OS) ON (B)(6) 2022. ON (B)(6) 2022 THE LENS EXPLANTED DUE TO EXCESSIVE VAULT. CAUSE REPORTED AS UNKNOWN. REPORTER STATED " PATIENT GOT COVID, SO THE SECONDARY IMPLANT IS POSTPONED." IF ADDITIONAL INFORMATION IS RECEIVED A SUPPLEMENTAL MEDWATCH REPORT WILL …	OS	Physician	11/14/2022	2022	27	Female
https://www.accessdata.fda.gov/scripts/cdrh/cfdocs/cfMAUDE/Detail.CFM?MDRFOI__ID=16210216&pc=MTA	2023826-2023-00206	2022-12-08 05:00:00	Injury	STAAR SURGICAL COMPANY	2023-01-19 05:00:00	MTA	IMPLANTABLE COLLAMER LENS (ICL)	Inadequacy of Device Shape and/or Size	Appropriate Clinical Signs, Symptoms, Conditions Term / Code Not Available	P030016	Event Description: THE REPORTER INDICATED THAT A 13.2MM VICM5_13.2 -10.00 DIOPTER IMPLANTABLE COLLAMER LENS WAS IMPLANTED INTO THE PATIENT'S LEFT EYE (OS) ON (B)(6) 2022. ON (B)(6) 2022 THE LENS WAS EXPLANTED DUE TO OBSERVATION OF EXCESSIVE VAULT AND SIGNIFICANT REDUCTION OF IRIDOCORNEAL ANGLES. THIS EXPLANT RESOLVED THE PROBLEM. THE REPORTER STATES THE CAUSE OF THIS EVENT IS DUE TO PATIENT RELAT…	OS	Other Health Care Professional	12/20/2022	2022	45	Female
https://www.accessdata.fda.gov/scripts/cdrh/cfdocs/cfMAUDE/Detail.CFM?MDRFOI__ID=16301127&pc=MTA	2023826-2023-00434	2022-12-13 05:00:00	Injury	STAAR SURGICAL COMPANY	2023-02-04 05:00:00	MTA	IMPLANTABLE COLLAMER LENS (ICL)	Inadequacy of Device Shape and/or Size	Appropriate Clinical Signs, Symptoms, Conditions Term / Code Not Available	P030016	Event Description: THE REPORTER INDICATED THAT A 12.6MM, VICMO12.6, -15.50 DIOPTER, IMPLANTABLE COLLAMER LENS WAS IMPLANTED INTO THE PATIENTS RIGHT EYE (OD) ON (B)(6) 2022. ON (B)(6) 2022 THE LENS WAS EXPLANTED DUE TO EXCESSIVE VAULT AND SIGNIFICANT REDUCTION OR IRIDOCORNEAL ANGLES. A REPLACEMENT LENS OF SHORTER LENGTH WAS LATER IMPLANTED AND THE PROBLEM RESOLVED. Manufacturer Narrative: HEALTH E…	OD	Physician	01/04/2023	2023	51	Female
https://www.accessdata.fda.gov/scripts/cdrh/cfdocs/cfMAUDE/Detail.CFM?MDRFOI__ID=17061378&pc=MTA	2023826-2023-02030	2023-01-17 05:00:00	Malfunction	STAAR SURGICAL COMPANY	2023-06-05 04:00:00	MTA	IMPLANTABLE COLLAMER LENS (ICL)	Inadequacy of Device Shape and/or Size	Appropriate Clinical Signs, Symptoms, Conditions Term / Code Not Available	P030016	Event Description: THE REPORTER INDICATED THAT A 13.2MM VICMO13.2, -10.0 DIOPTER, IMPLANTABLE COLLAMER LENS WAS IMPLANTED, REMOVED, AND REPLACED INTRAOPERATIVELY WITH A SHORTER LENGTH LENS ON (B)(6) 2023 FROM PATIENT'S RIGHT EYE (OD) DUE TO SIGNIFICANT REDUCTION OF IRIDO-CORNEL ANGLES AND EXCESSIVE VAULT.THIS RESOLVED THE PROBLEM. CAUSE OF THE EVENT IS REPORTED AS UNKNOWN. Manufacturer Narrative:…	OD	Physician	05/15/2023	2023	26	Female
https://www.accessdata.fda.gov/scripts/cdrh/cfdocs/cfMAUDE/Detail.CFM?MDRFOI__ID=16562713&pc=MTA	2023826-2023-00883	2023-01-25 05:00:00	Injury	STAAR SURGICAL COMPANY	2023-03-17 04:00:00	MTA	IMPLANTABLE COLLAMER LENS (ICL)	Inadequacy of Device Shape and/or Size	Appropriate Clinical Signs, Symptoms, Conditions Term / Code Not Available	P030016	Event Description: THE REPORTER INDICATED THAT A 13.2MM VICM5_13.2 IMPLANTABLE COLLAMER LENS OF -11.00 DIOPTER WAS IMPLANTED INTO THE PATIENT'S RIGHT EYE (OD) ON (B)(6) 2023. ON (B)(6) 2023 THE LENS WAS EXCHANGED FOR A SHORTER LENGTH LENS DUE TO EXCESSIVE VAULT AND SIGNIFICANT REDUCTION OF IRIDOCORNEAL ANGLES. THIS EXCHANGE RESOLVED THE PROBLEM. Manufacturer Narrative: CORRECTED DATA: B5- THE REP…	OD	Physician	02/16/2023	2023	29	Female
https://www.accessdata.fda.gov/scripts/cdrh/cfdocs/cfMAUDE/Detail.CFM?MDRFOI__ID=16713974&pc=MTA	2023826-2023-01216	2023-02-03 05:00:00	Injury	STAAR SURGICAL COMPANY	2023-04-11 04:00:00	MTA	IMPLANTABLE COLLAMER LENS (ICL)	Inadequacy of Device Shape and/or Size	Appropriate Clinical Signs, Symptoms, Conditions Term / Code Not Available	P030016	Event Description: THE REPORTER INDICATED THAT THE SURGEON IMPLANTED A 12.6MM VICMO12.6, -08.50 DIOPTER, IMPLANTABLE COLLAMER LENS INTO THE PATIENT'S LEFT EYE (OS) ON (B)(6) 2023. THE LENS WAS REPLACED WITH A SHORTER LENGTH LENS DUE TO EXCESSIVE VAULT ON (B)(6) 2023. THIS RESOLVED THE PROBLEM. CAUSE OF THE EVENT IS REPORTED AS UNKNOWN. Manufacturer Narrative: PATIENT WEIGHT, ETHNICITY & RACE UNKN…	OS	Physician	03/19/2023	2023	25	Female
https://www.accessdata.fda.gov/scripts/cdrh/cfdocs/cfMAUDE/Detail.CFM?MDRFOI__ID=16620714&pc=MTA	2023826-2023-01025	2023-02-06 05:00:00	Injury	STAAR SURGICAL COMPANY	2023-03-27 04:00:00	MTA	IMPLANTABLE COLLAMER LENS (ICL)	Inadequacy of Device Shape and/or Size	Appropriate Clinical Signs, Symptoms, Conditions Term / Code Not Available	P030016	Event Description: THE REPORTER INDICATED THAT THE SURGEON IMPLANTED A 12.6MM VICMO12.6, -04.00 DIOPTER, IMPLANTABLE COLLAMER LENS INTO THE PATIENT'S LEFT EYE (OS) ON (B)(6) 2022. THE LENS WAS REPLACED WITH A SHORTER LENGTH LENS DUE TO EXCESSIVE VAULT ON (B)(6) 2023. THIS RESOLVED THE PROBLEM. CAUSE OF THE EVENT IS REPORTED AS UNKNOWN. Manufacturer Narrative: PATIENT INFORMATION UNKNOWN. CLAIM# (…	OS	Physician	03/07/2023	2023	28	Male
https://www.accessdata.fda.gov/scripts/cdrh/cfdocs/cfMAUDE/Detail.CFM?MDRFOI__ID=17770485&pc=MTA	2023826-2023-04102	2023-03-29 04:00:00	Malfunction	STAAR SURGICAL COMPANY	2023-09-18 04:00:00	MTA	IMPLANTABLE COLLAMER LENS (ICL)	Inadequacy of Device Shape and/or Size	Appropriate Clinical Signs, Symptoms, Conditions Term / Code Not Available	P030016	Event Description: THE REPORTER INDICATED THAT THE SURGEON IMPLANTED A 12.6MM VICM5_12.6, -9.00 DIOPTER IMPLANTABLE COLLAMER LENS INTO THE PATIENT'S LEFT EYE (OS) ON (B)(6) 2023. THE SURGEON REPORTS THERE IS LOW VAULTING AND THERE WAS DECREASED NEAR VISION IN BRIGHT LIGHT. LENS REMAINS IMPLANTED WITH A PLANNED LENS EXCHANGED. THE CAUSE OF THE EVENT WAS REPORTED AS OTHER AND NOTED "BRIGHT LIGHT CO…	OS	Other Health Care Professional	09/04/2023	2023	35	Male
https://www.accessdata.fda.gov/scripts/cdrh/cfdocs/cfMAUDE/Detail.CFM?MDRFOI__ID=18341176&pc=MTA	2023826-2023-05644	2023-04-19 04:00:00	Injury	STAAR SURGICAL COMPANY	2023-12-15 05:00:00	MTA	IMPLANTABLE COLLAMER LENS (ICL)	Inadequacy of Device Shape and/or Size	Appropriate Clinical Signs, Symptoms, Conditions Term / Code Not Available	P030016	Event Description: THE REPORTER INDICATED THAT THE SURGEON IMPLANTED A 13.2MM VICM5_13.2 IMPLANTABLE COLLAMER LENS OF DIOPTER -16.0 INTO THE PATIENT'S LEFT EYE (OS) ON (B)(6) 2023. EXCESSIVE VAULTING WAS NOTED AND SIGNIFICANT REDUCTION OF IRIDO-CORNEAL ANGLES DESCRIBED AS "ANGLE 19.7°" WAS REPORTED. IT WAS ALSO MARKED THAT LENS REPOSITIONING DID NOT RESOLVE THE ISSUE; HOWEVER, NO REPOSITIONING DA…	OS	Physician	11/20/2023	2023	26	Female
https://www.accessdata.fda.gov/scripts/cdrh/cfdocs/cfMAUDE/Detail.CFM?MDRFOI__ID=18080759&pc=MTA	2023826-2023-04993	2023-04-25 04:00:00	Injury	STAAR SURGICAL COMPANY	2023-11-06 05:00:00	MTA	IMPLANTABLE COLLAMER LENS (ICL)	Inadequacy of Device Shape and/or Size	Appropriate Clinical Signs, Symptoms, Conditions Term / Code Not Available	P030016	Event Description: THE REPORTER INDICATED THAT THE SURGEON IMPLANTED A 12.6MM VICMO12.6; -5.0 DIOPTER IMPLANTABLE COLLAMER LENS INTO THE PATIENT'S LEFT EYE (OS) ON (B)(6) 2022. THE PATIENT EXPERIENCED EXCESSIVE VAULTING AND SIGNIFICANT REDUCTION OF IRIDO-CORNEAL ANGLES. ON (B)(6) 2023 THE LENS WAS EXCHANGED WITH A SHORTER LENGTH LENS AND THE PROBLEM WAS RESOLVED. THE CAUSE OF THE EVENT WAS REPORT…	OS	Physician	10/26/2023	2023	38	Female
https://www.accessdata.fda.gov/scripts/cdrh/cfdocs/cfMAUDE/Detail.CFM?MDRFOI__ID=17081937&pc=MTA	2023826-2023-02273	2023-04-26 04:00:00	Injury	STAAR SURGICAL COMPANY	2023-06-07 04:00:00	MTA	IMPLANTABLE COLLAMER LENS (ICL)	Inadequacy of Device Shape and/or Size	Appropriate Clinical Signs, Symptoms, Conditions Term / Code Not Available	P030016	Event Description: THE REPORTER INDICATED THAT THE SURGEON IMPLANTED A 12.6MM VICM5_12.6 IMPLANTABLE COLLAMER LENS OF DIOPTER -10.0 INTO THE PATIENT'S RIGHT EYE (OD) ON (B)(6) 2023. THE LENS WAS EXCHANGED ON (B)(6) 2023 FOR A LONGER LENGTH LENS DUE TO LOW VAULT. THIS RESOLVED THE PROBLEM. THE REPORTER DID NOT GIVE A CAUSE FOR THIS EVENT. Manufacturer Narrative: B5: THE REPORTER INDICATED THAT THE…	OD	Physician	05/08/2023	2023	29	Male
https://www.accessdata.fda.gov/scripts/cdrh/cfdocs/cfMAUDE/Detail.CFM?MDRFOI__ID=17167038&pc=MTA	2023826-2023-02367	2023-05-01 04:00:00	Injury	STAAR SURGICAL COMPANY	2023-06-20 04:00:00	MTA	IMPLANTABLE COLLAMER LENS (ICL)	Inadequacy of Device Shape and/or Size	Appropriate Clinical Signs, Symptoms, Conditions Term / Code Not Available	P030016	Event Description: THE REPORTER INDICATED THE SURGEON IMPLANTED A 12.6MM VICMO12.6 IMPLANTABLE COLLAMER LENS, -05.00 DIOPTER, IN THE PATIENTS LEFT EYE (OS), ON (B)(6) 2023. THE LENS WAS EXPLANTED ON (B)(6) 2023 DUE TO EXCESSIVE VAULTING AND SIGNIFICANT REDUCTION OF IRIDO-CORNEAL ANGLES. THE CORNEAL ENDOTHELIUM WAS EDEMATOUS AND THE CENTRAL ENDOTHELIUM WAS TURBID. THE AQUEOUS HUMOR WAS SPARKLING (…	OS	Physician	05/25/2023	2023	32	Female
https://www.accessdata.fda.gov/scripts/cdrh/cfdocs/cfMAUDE/Detail.CFM?MDRFOI__ID=17321985&pc=MTA	2023826-2023-02898	2023-06-16 04:00:00	Malfunction	STAAR SURGICAL COMPANY	2023-07-13 04:00:00	MTA	IMPLANTABLE COLLAMER LENS (ICL)	Inadequacy of Device Shape and/or Size	Appropriate Clinical Signs, Symptoms, Conditions Term / Code Not Available	P030016	Event Description: THE REPORTER INDICATED THAT THE SURGEON IMPLANTED A 13.2MM VICM5_13.2; -7.50 DIOPTER IMPLANTABLE COLLAMER LENS INTO THE PATIENT'S LEFT EYE (OS) ON 03-JUN-2020. THE PATIENT EXPERIENCED EXCESSIVE VAULTING AND SHALLOW ANGLE TEMPORAL. THE SURGEON NOTES THERE ARE NO SYMPTOMS AND PRESSURE IS NORMAL, SHALLOW TEMPORAL COMPARED TO NASAL. THE PATIENT IS HAPPY BUT VAULT IS HIGH AND TEMPOR…	OS	Physician	06/19/2023	2023	44	Female
https://www.accessdata.fda.gov/scripts/cdrh/cfdocs/cfMAUDE/Detail.CFM?MDRFOI__ID=17654640&pc=MTA	2023826-2023-03440	2023-08-07 04:00:00	Injury	STAAR SURGICAL COMPANY	2023-08-30 04:00:00	MTA	IMPLANTABLE COLLAMER LENS (ICL)	Inadequacy of Device Shape and/or Size	Appropriate Clinical Signs, Symptoms, Conditions Term / Code Not Available	P030016	Event Description: THE REPORTER INDICATED THAT A 13.7MM VICM5 13.7 IMPLANTABLE COLLAMER LENS OF -14.00 DIOPTER WAS IMPLANTED INTO THE PATIENTS LEFT EYE (OS) ON (B)(6) 2023. EXCESSIVE VAULT WAS OBSERVED WITH SIGNIFICANT REDUCTION OF IRIDOCORNEAL ANGLES.. THE LENS REMAINS IMPLANTED. REPORTER STATES. "PATIENT SCHEDULED FOR REPLACEMENT OF ICL." IF ADDITIONAL INFORMATION IS RECEIVED A SUPPLEMENTAL MED…	OS	Physician	08/08/2023	2023	41	Male
https://www.accessdata.fda.gov/scripts/cdrh/cfdocs/cfMAUDE/Detail.CFM?MDRFOI__ID=17932866&pc=MTA	2023826-2023-04401	2023-09-05 04:00:00	Injury	STAAR SURGICAL COMPANY	2023-10-13 04:00:00	MTA	IMPLANTABLE COLLAMER LENS (ICL)	Inadequacy of Device Shape and/or Size	Appropriate Clinical Signs, Symptoms, Conditions Term / Code Not Available	P030016	Event Description: THE REPORTER INDICATED THE SURGEON IMPLANTED A 13.2MM VICM5_13.2 IMPLANTABLE COLLAMER LENS, -08.50 DIOPTER, INTO THE PATIENTS LEFT EYE (OS) ON (B)(6) 2023. THE LENS WAS REMOVED ON (B)(6) 2023 DUE TO EXCESSIVE VAULTING AND SIGNIFICANT REDUCTION OF IRIDO-CORNEAL ANGLES. THE LENS WAS REPLACED WITH A SHORTER LENS AND THE PROBLEM WAS RESOLVED. THE CAUSE OF THE EVENT WAS UNKNOWN. Man…	OS	Physician	09/22/2023	2023	24	Female
https://www.accessdata.fda.gov/scripts/cdrh/cfdocs/cfMAUDE/Detail.CFM?MDRFOI__ID=18414575&pc=MTA	2023826-2023-05821	2023-09-15 04:00:00	Injury	STAAR SURGICAL COMPANY	2023-12-28 05:00:00	MTA	IMPLANTABLE COLLAMER LENS (ICL)	Inadequacy of Device Shape and/or Size	Appropriate Clinical Signs, Symptoms, Conditions Term / Code Not Available	P030016	Event Description: THE REPORTER INDICATED THAT THE SURGEON IMPLANTED A 12.6MM VICMO12.6 IMPLANTABLE COLLAMER LENS OF DIOPTER -5.0 INTO THE PATIENT'S LEFT EYE (OS) ON (B)(6) 2023. THE LENS WAS REMOVED ON (B)(6) 2023 DUE TO EXCESSIVE VAULT AND SIGNIFICANT REDUCTION OF IRIDO-CORNEAL ANGLES. IN A SEPARATE SURGERY THAT DAY A SHORTER LENGTH LENS WAS IMPLANTED AND THE PROBLEM RESOLVED. CAUSE OF EVENT RE…	OS	Physician	11/30/2023	2023	28	Female
https://www.accessdata.fda.gov/scripts/cdrh/cfdocs/cfMAUDE/Detail.CFM?MDRFOI__ID=18414605&pc=MTA	2023826-2023-05820	2023-09-15 04:00:00	Injury	STAAR SURGICAL COMPANY	2023-12-28 05:00:00	MTA	IMPLANTABLE COLLAMER LENS (ICL)	Inadequacy of Device Shape and/or Size	Appropriate Clinical Signs, Symptoms, Conditions Term / Code Not Available	P030016	Event Description: THE REPORTER INDICATED THAT THE SURGEON IMPLANTED A 12.6MM VICMO12.6 IMPLANTABLE COLLAMER LENS OF DIOPTER -5.5 INTO THE PATIENT'S RIGHT EYE (OD) ON (B)(6) 2023. THE LENS WAS REMOVED ON (B)(6) 2023 DUE TO EXCESSIVE VAULT AND SIGNIFICANT REDUCTION OF IRIDO-CORNEAL ANGLES. IN A SEPARATE SURGERY THAT DAY A SHORTER LENGTH LENS WAS IMPLANTED AND THE PROBLEM RESOLVED. CAUSE OF EVENT R…	OD	Physician	11/30/2023	2023	28	Female
https://www.accessdata.fda.gov/scripts/cdrh/cfdocs/cfMAUDE/Detail.CFM?MDRFOI__ID=18166351&pc=MTA	2023826-2023-05180	2023-09-25 04:00:00	Injury	STAAR SURGICAL COMPANY	2023-11-17 05:00:00	MTA	IMPLANTABLE COLLAMER LENS (ICL)	Inadequacy of Device Shape and/or Size	Appropriate Clinical Signs, Symptoms, Conditions Term / Code Not Available	P030016	Event Description: THE REPORTER INDICATED THAT THE SURGEON IMPLANTED A 13.7MM VICM5 13.7 IMPLANTABLE COLLAMER LENS OF -8.0 INTO THE PATIENTS RIGHT EYE (OD) ON (B)(6) 2023. EXCESSIVE VAULT WAS OBSERVED WITH SIGNIFICANT REDUCTION OF IRIDOCORNEAL ANGLES. ON (B)(6) 2023 THE LENS WAS EXPLANTED AND ON THE SAME DAY DIFFERENT SURGERY A REPLACEMENT OF SHORTER LENGTH WAS IMPLANTED AND THE PROBLEM WAS RESOL…	OD	Physician	10/19/2023	2023	38	Male
https://www.accessdata.fda.gov/scripts/cdrh/cfdocs/cfMAUDE/Detail.CFM?MDRFOI__ID=18414574&pc=MTA	2023826-2023-05824	2023-10-11 04:00:00	Injury	STAAR SURGICAL COMPANY	2023-12-28 05:00:00	MTA	IMPLANTABLE COLLAMER LENS (ICL)	Inadequacy of Device Shape and/or Size	Appropriate Clinical Signs, Symptoms, Conditions Term / Code Not Available	P030016	Event Description: THE REPORTER INDICATED THAT THE SURGEON IMPLANTED A 13.2MM VICM5_13.2 IMPLANTABLE COLLAMER LENS OF DIOPTER -13.0 INTO THE PATIENT'S LEFT EYE (OS) ON (B)(6) 2023. THE LENS WAS EXPLANTED ON (B)(6) 2023 DUE TO EXCESSIVE VAULT AND SIGNIFICANT REDUCTION OF IRIDO-CORNEAL ANGLES. IN A SEPARATE SURGERY THAT DAY A LENS TWO SIZES SHORTER IN LENGTH WAS IMPLANTED AND THE PROBLEM WAS RESOLV…	OS	Physician	12/01/2023	2023	36	Female
https://www.accessdata.fda.gov/scripts/cdrh/cfdocs/cfMAUDE/Detail.CFM?MDRFOI__ID=18472104&pc=MTA	2023826-2024-00113	2023-11-07 05:00:00	Injury	STAAR SURGICAL COMPANY	2024-01-08 05:00:00	MTA	IMPLANTABLE COLLAMER LENS (ICL)	Inadequacy of Device Shape and/or Size	Appropriate Clinical Signs, Symptoms, Conditions Term / Code Not Available	P030016	Event Description: THE REPORTER INDICATED THAT A 13.7MM VICM5_13.7 IMPLANTABLE COLLAMER LENS OF -12.50 DIOPTER WAS IMPLANTED INTO THE PATIENT'S LEFT EYE (OS) ON (B)(6) 2023. ON (B)(6) 2023 THE LENS WAS EXCHANGED WITH A SHORTER LENGTH LENS DUE TO EXCESSIVE VAULT AND SIGNIFICANT REDUCTION OF IRIDOCORNEAL ANGLES. THE EXCHANGE RESOLVED THE PROBLEM, THE REPORTER STATED " VAULT REDUCED TO NORMAL AND PA…	OS	Physician	12/14/2023	2023	30	Female
https://www.accessdata.fda.gov/scripts/cdrh/cfdocs/cfMAUDE/Detail.CFM?MDRFOI__ID=11010454&pc=MTA	2023826-2020-03078		Injury	STAAR SURGICAL COMPANY	2020-12-15 05:00:00	MTA	IMPLANTABLE COLLAMER LENS (ICL)	Inadequacy of Device Shape and/or Size	Appropriate Clinical Signs, Symptoms, Conditions Term / Code Not Available	N/A	Event Description: THE REPORTER INDICATED THAT A 13.2MM, VICM5_13.2,-5.00 DIOPTER, IMPLANTABLE COLLAMER LENS WAS IMPLANTED INTO THE PATIENTS RIGHT EYE (OD) ON (B)(6) 2020. ON (B)(6) 2020 THE LENS WAS EXCHANGED FOR A SHORTER LENGTH LENS DUE TO EXCESSIVE VAULT AND SIGNIFICANT REDUCTION OF ICA. THIS EXCHANGE RESOLVED THE PROBLEM. Manufacturer Narrative: ADDITIONAL INFORMATION: H3- DEVICE EVALUATION:…	OD		11/17/2020	2020
https://www.accessdata.fda.gov/scripts/cdrh/cfdocs/cfMAUDE/Detail.CFM?MDRFOI__ID=13911479&pc=MTA	2023826-2022-00971		Malfunction	STAAR SURGICAL COMPANY	2022-03-25 04:00:00	MTA	IMPLANTABLE COLLAMER LENS (ICL)	Inadequacy of Device Shape and/or Size	Appropriate Clinical Signs, Symptoms, Conditions Term / Code Not Available	N/A	Event Description: THE REPORTER INDICATED THE SURGEON IMPLANTED A 13.2MM VICM5_13.2 IMPLANTABLE COLLAMER LENS, DIOPTER -10.0 INTO THE PATIENT'S LEFT EYE (OS) ON (B)(6) 2022. THE SURGEON REPORTS SHALLOW VAULT AND RESIDUAL AMETROPIA. REPORTEDLY, THE LENS REMAINS IMPLANTED AND WILL BE MONITORED, "SINCE THERE ARE SOME MILD ANTERIOR CAPSULE CHANGES AND I DO NOT WANT TO GO BACK IN." Manufacturer Narrat…	OS	Physician	03/04/2022	2022		Male
https://www.accessdata.fda.gov/scripts/cdrh/cfdocs/cfMAUDE/Detail.CFM?MDRFOI__ID=13911490&pc=MTA	2023826-2022-00970		Malfunction	STAAR SURGICAL COMPANY	2022-03-25 04:00:00	MTA	IMPLANTABLE COLLAMER LENS (ICL)	Inadequacy of Device Shape and/or Size	Appropriate Clinical Signs, Symptoms, Conditions Term / Code Not Available	N/A	Event Description: THE REPORTER INDICATED THE SURGEON IMPLANTED A 13.2MM VICM5_13.2 IMPLANTABLE COLLAMER LENS, DIOPTER -9.0 INTO THE PATIENT'S RIGHT EYE (OD) ON (B)(6) 2022. THE SURGEON REPORTS LOW VAULT AND RESIDUAL AMETROPIA. REPORTEDLY, THE LENS REMAINS IMPLANTED. Manufacturer Narrative: WEIGHT, ETHNICITY, RACE: UNK. DATE OF EVENT: UNK. PMA/510(K): THIS PRODUCT IS MANUFACTURED IN THE U.S. BUT …	OD	Physician	03/04/2022	2022		Male
https://www.accessdata.fda.gov/scripts/cdrh/cfdocs/cfMAUDE/Detail.CFM?MDRFOI__ID=14524935&pc=MTA	2023826-2022-01697		Injury	STAAR SURGICAL COMPANY	2022-05-27 04:00:00	MTA	IMPLANTABLE COLLAMER LENS (ICL)	Inadequacy of Device Shape and/or Size	Appropriate Clinical Signs, Symptoms, Conditions Term / Code Not Available	P030016	Event Description: THE REPORTER INDICATED THAT THE SURGEON IMPLANTED A 12.6MM VICM5_12.6; -7.50 DIOPTER IMPLANTABLE COLLAMER LENS INTO THE PATIENT'S LEFT EYE (OS) ON (B)(6) 2021. THE PATIENT EXPERIENCED EXCESSIVE VAULTING AND SIGNIFICANT REDUCTION OF IRIDO-CORNEAL ANGLES. ON (B)(6) 2022 THE LENS WAS EXCHANGED FOR A SHORTER LENGTH LENS AND THIS RESOLVED THE PROBLEM. THE CAUSE OF THE EVENT WAS REPO…	OS	Physician	05/16/2022	2022		Female
https://www.accessdata.fda.gov/scripts/cdrh/cfdocs/cfMAUDE/Detail.CFM?MDRFOI__ID=14525054&pc=MTA	2023826-2022-01698		Injury	STAAR SURGICAL COMPANY	2022-05-27 04:00:00	MTA	IMPLANTABLE COLLAMER LENS (ICL)	Inadequacy of Device Shape and/or Size	Appropriate Clinical Signs, Symptoms, Conditions Term / Code Not Available	P030016	Event Description: THE REPORTER INDICATED THAT THE SURGEON IMPLANTED A 12.6MM VICM5_12.6; -7.50 DIOPTER IMPLANTABLE COLLAMER LENS INTO THE PATIENT'S RIGHT EYE (OD) ON (B)(6) 2021. THE PATIENT EXPERIENCED EXCESSIVE VAULTING AND SIGNIFICANT REDUCTION OF IRIDO-CORNEAL ANGLES. ON (B)(6) 2022 THE LENS WAS EXCHANGED FOR A SHORTER LENGTH LENS AND THIS RESOLVED THE PROBLEM. THE CAUSE OF THE EVENT WAS REP…	OD	Physician	05/16/2022	2022		Female
https://www.accessdata.fda.gov/scripts/cdrh/cfdocs/cfMAUDE/Detail.CFM?MDRFOI__ID=15048522&pc=MTA	2023826-2022-02304		Malfunction	STAAR SURGICAL COMPANY	2022-07-18 04:00:00	MTA	IMPLANTABLE COLLAMER LENS (ICL)	Inadequacy of Device Shape and/or Size	Appropriate Clinical Signs, Symptoms, Conditions Term / Code Not Available	P030016	Event Description: THE REPORTER INDICATED THAT A 13.2MM, VICMO13.2, -16.0 DIOPTER IMPLANTABLE COLLAMER LENS WAS IMPLANTED INTO THE PATIENTS LEFT EYE (OS) ON (B)(6) 2022. THE PATIENT EXPERIENCED HIGH VAULT AND NARROW ANGLES, LENS REMAINS IMPLANTED. THE REPORTER STATED THAT THE PATIENT IS DOING WELL, IOP 17/18 EXCELLENT VISION 20/20. IF ADDITIONAL INFORMATION IS RECEIVED A SUPPLEMENTAL MEDWATCH REP…	OS	Physician	06/18/2022	2022		Female
https://www.accessdata.fda.gov/scripts/cdrh/cfdocs/cfMAUDE/Detail.CFM?MDRFOI__ID=15588726&pc=MTA	2023826-2022-03598		Injury	STAAR SURGICAL COMPANY	2022-10-12 04:00:00	MTA	IMPLANTABLE COLLAMER LENS (ICL)	Inadequacy of Device Shape and/or Size	Appropriate Clinical Signs, Symptoms, Conditions Term / Code Not Available	P030016	Event Description: THE REPORTER INDICATED THAT A 13.2MM VICM5_13.2 IMPLANTABLE COLLAMER LENS -5.0DIOPTER WAS IMPLANTED INTO THE PATIENT'S LEFT EYE (OS) ON (B)(6) 2021. ON (B)(6) 2021 THE LENS WAS EXCHANGED FOR A SHORTER LENGTH LENS DUE TO EXCESSIVE VAULT AND SIGNIFICANT REDUCTION OF IRIDOCORNEAL ANGLES. THE EXCHANGE RESOLVED THE PROBLEM. CAUSE WAS REPORTED AS DEVICE. Manufacturer Narrative: DEVIC…	OS	Physician	09/16/2022	2022
https://www.accessdata.fda.gov/scripts/cdrh/cfdocs/cfMAUDE/Detail.CFM?MDRFOI__ID=17061119&pc=MTA	2023826-2023-02040		Injury	STAAR SURGICAL COMPANY	2023-06-05 04:00:00	MTA	IMPLANTABLE COLLAMER LENS (ICL)	Inadequacy of Device Shape and/or Size	Appropriate Clinical Signs, Symptoms, Conditions Term / Code Not Available	P030016	Event Description: THE REPORTER INDICATED THAT THE SURGEON IMPLANTED A 13.2MM VICM5 13.2, -04.50 DIOPTER, IMPLANTABLE COLLAMER LENS INTO THE PATIENT'S LEFT EYE (OS) ON (B)(6) 2023. THE LENS WAS REPOSITIONED ON (B)(6) 2023 DUE TO SIGNIFICANT REDUCTION OF IRIDO CORNEAL ANGLES AND EXCESSIVE VAULT AND DID NOT RESOLVE THE PROBLEM. THE LENS WAS REPLACED WITH A SHORTER LENGTH LENS ON (B)(6) 2023. THIS R…	OS	Physician	05/19/2023	2023		Female
https://www.accessdata.fda.gov/scripts/cdrh/cfdocs/cfMAUDE/Detail.CFM?MDRFOI__ID=17619768&pc=MTA	2023826-2023-03600		Injury	STAAR SURGICAL COMPANY	2023-08-24 04:00:00	MTA	IMPLANTABLE COLLAMER LENS (ICL)	Inadequacy of Device Shape and/or Size	Appropriate Clinical Signs, Symptoms, Conditions Term / Code Not Available	P030016	Event Description: THE REPORTER INDICATED THAT A 13.2MM VICM5_13.2 IMPLANTABLE COLLAMER LENS -5.00 DIOPTER WAS IMPLANTED INTO THE PATIENT'S RIGHT EYE (OD) ON (B)(6) 2022. ON (B)(6) 2022 THE LENS WAS EXPLANTED DUE TO EXCESSIVE VAULT AND SIGNIFICANT REDUCTION OF IRIDOCORNEAL ANGLES. ON (B)(6) 2022 A REPLACEMENT LENS OF SHORTER LENGTH WAS IMPLANTED AND THE PROBLEM RESOLVED. CAUSE OF EVENT WAS UNKNOW…	OD	Physician	07/28/2023	2023		Female
https://www.accessdata.fda.gov/scripts/cdrh/cfdocs/cfMAUDE/Detail.CFM?MDRFOI__ID=17619877&pc=MTA	2023826-2023-03601		Injury	STAAR SURGICAL COMPANY	2023-08-24 04:00:00	MTA	IMPLANTABLE COLLAMER LENS (ICL)	Inadequacy of Device Shape and/or Size	Appropriate Clinical Signs, Symptoms, Conditions Term / Code Not Available	P030016	Event Description: THE REPORTER INDICATED THAT A 13.2MM VICM5_13.2 IMPLANTABLE COLLAMER LENS -6.00 DIOPTER WAS IMPLANTED INTO THE PATIENT'S LEFT EYE (OS) ON (B)(6) 2022. ON (B)(6) 2022 THE LENS WAS EXPLANTED DUE TO EXCESSIVE VAULT AND SIGNIFICANT REDUCTION OF IRIDOCORNEAL ANGLES. ON (B)(6) 2022 A REPLACEMENT LENS OF SHORTER LENGTH WAS IMPLANTED AND THE PROBLEM RESOLVED. CAUSE OF EVENT WAS UNKNOWN…	OS	Physician	07/28/2023	2023		Female
https://www.accessdata.fda.gov/scripts/cdrh/cfdocs/cfMAUDE/Detail.CFM?MDRFOI__ID=17978644&pc=MTA	2023826-2023-04565		Injury	STAAR SURGICAL COMPANY	2023-10-20 04:00:00	MTA	IMPLANTABLE COLLAMER LENS (ICL)	Inadequacy of Device Shape and/or Size	Appropriate Clinical Signs, Symptoms, Conditions Term / Code Not Available	P030016	Event Description: THE REPORTER INDICATED THE SURGEON IMPLANTED A 13.2MM VICM5_13.2 IMPLANTABLE COLLAMER LENS, -08.50 DIOPTER, INTO THE PATIENTS RIGHT EYE (OD) ON (B)(6) 2023. THE LENS WAS REMOVED ON (B)(6) 2023 DUE TO EXCESSIVE VAULTING AND SIGNIFICANT REDUCTION OF IRIDO-CORNEAL ANGLES. THE LENS WAS REPLACED WITH A SHORTER LENS AND THE PROBLEM WAS RESOLVED. ADDITIONAL INFORMATION HAS BEEN REQUES…	OD	Physician	09/29/2023	2023		Female
https://www.accessdata.fda.gov/scripts/cdrh/cfdocs/cfMAUDE/Detail.CFM?MDRFOI__ID=18067949&pc=MTA	2023826-2023-04758		Injury	STAAR SURGICAL COMPANY	2023-11-03 04:00:00	MTA	IMPLANTABLE COLLAMER LENS (ICL)	Inadequacy of Device Shape and/or Size	Appropriate Clinical Signs, Symptoms, Conditions Term / Code Not Available	P030016	Event Description: THE REPORTER INDICATED THE SURGEON IMPLANTED A 13.2MM VICM5_13.2 IMPLANTABLE COLLAMER LENS, -05.50 DIOPTER, INTO THE PATIENTS LEFT EYE (OS) ON (B)(6) 2022. THE LENS WAS REPORTED AS LOW VAULTING AND PATIENT EXPERIENCED REFRACTIVE CHANGE OVERTIME. THE LENS REMAINED IMPLANTED. THE CAUSE OF THE EVENT WAS UNKNOWN. ADDITIONAL INFORMATION HAS BEEN REQUESTED BUT NONE HAS BEEN FORTHCOMI…	OS	Physician	10/10/2023	2023		Female
https://www.accessdata.fda.gov/scripts/cdrh/cfdocs/cfMAUDE/Detail.CFM?MDRFOI__ID=18360961&pc=MTA	2023826-2023-05555		Malfunction	STAAR SURGICAL COMPANY	2023-12-19 05:00:00	MTA	IMPLANTABLE COLLAMER LENS (ICL)	Inadequacy of Device Shape and/or Size	Appropriate Clinical Signs, Symptoms, Conditions Term / Code Not Available	P030016	Event Description: THE REPORTER INDICATED THE SURGEON IMPLANTED A 12.6MM VICM5_12.6 IMPLANTABLE COLLAMER LENS, -09.50 DIOPTER, IN THE PATIENTS LEFT EYE (OS), ON (B)(6) 2023. THE LENS WAS REPORTED AS LOW VAULTING AND PATIENT EXPERIENCED A MILD DISCORIC PUPIL (MILD DILATED 5MM AND SLOWLY REACTIVE TO LIGHT). THE INTRAOCULAR PRESSURE HAS BEEN MEASURED WITHIN NORMAL LIMITS. THE LENS REMAINED IMPLANTED…	OS	Physician	11/27/2023	2023		Male
https://www.accessdata.fda.gov/scripts/cdrh/cfdocs/cfMAUDE/Detail.CFM?MDRFOI__ID=18472279&pc=MTA	2023826-2024-00116		Injury	STAAR SURGICAL COMPANY	2024-01-08 05:00:00	MTA	IMPLANTABLE COLLAMER LENS (ICL)	Inadequacy of Device Shape and/or Size	Appropriate Clinical Signs, Symptoms, Conditions Term / Code Not Available	P030016	Event Description: THE REPORTER INDICATED THAT A 12.6MM VICM5_12.6 IMPLANTABLE COLLAMER LENS OF -5.00 DIOPTER WAS IMPLANTED INTO THE PATIENT'S EYE ON (B)(6) 2023. ON (B)(6) 2023 THE LENS WAS EXPLANTED DUE TO EXCESSIVE VAULT WITH VERY SHALLOW ANGLES. A REPLACEMENT LENS WAS IMPLANTED. ADDITIONAL INFORMATION HAS BEEN REQUESTED BUT NONE HAS BEEN FORTHCOMING. IF ADDITIONAL INFORMATION IS RECEIVED A SU…	OD	Other Health Care Professional	12/15/2023	2023	35	Female
https://www.accessdata.fda.gov/scripts/cdrh/cfdocs/cfMAUDE/Detail.CFM?MDRFOI__ID=10905481&pc=MTA	2023826-2020-02730	2020-11-03 05:00:00	Injury	STAAR SURGICAL COMPANY	2020-11-25 05:00:00	MTA	IMPLANTABLE COLLAMER LENS (ICL)	Inadequacy of Device Shape and/or Size; Adverse Event Without Identified Device or Use Problem	Appropriate Clinical Signs, Symptoms, Conditions Term / Code Not Available	N/A	Event Description: THE REPORTER INDICATED THAT A 13.2MM, VICM5 13.2, -10.50 DIOPTER, IMPLANTABLE COLLAMER LENS WAS IMPLANTED INTO THE PATIENT'S RIGHT EYE (OD) ON (B)(6) 2020. SIGNIFICANT REDUCTION OF IRIDO-CORNEAL ANGELS WAS OBSERVED. ON (B)(6) 2020 THE LENS WAS REPOSITIONED AND THE PROBLEM WAS RESOLVED. LENS REMAINS IMPLANTED. Manufacturer Narrative: "EXCESSIVE VAULT AND NARROWING OF THE ANTERIO…	OD		11/03/2020	2020	44
https://www.accessdata.fda.gov/scripts/cdrh/cfdocs/cfMAUDE/Detail.CFM?MDRFOI__ID=15142507&pc=MTA	2023826-2022-02572	2022-06-24 04:00:00	Malfunction	STAAR SURGICAL COMPANY	2022-08-01 04:00:00	MTA	IMPLANTABLE COLLAMER LENS (ICL)	Inadequacy of Device Shape and/or Size; Device Dislodged or Dislocated	Appropriate Clinical Signs, Symptoms, Conditions Term / Code Not Available	P030016	Event Description: THE REPORTER INDICATED THAT THE SURGEON IMPLANTED A 13.2MM VICM5_13.2; -10.0 DIOPTER IMPLANTABLE COLLAMER LENS INTO THE PATIENT'S LEFT EYE (OS) ON (B)(6) 2022. THE PATIENT EXPERIENCED CORNEAL EROSION (WHICH HEALED EXPECTEDLY AS THE SURGEON REPORTS); PATIENT COMPLAINS OF MULTIPLE IMAGES/REFLECTIONS/SHADOWS (MONOCULAR DIPLOPIA); LENS ROTATION AND LOW VAULTING. LENS REMAINS IMPLAN…	OS	Other Health Care Professional	07/08/2022	2022	34	Male
https://www.accessdata.fda.gov/scripts/cdrh/cfdocs/cfMAUDE/Detail.CFM?MDRFOI__ID=12808009&pc=MTA	2023826-2021-04322		Injury	STAAR SURGICAL COMPANY	2021-11-12 05:00:00	MTA	IMPLANTABLE COLLAMER LENS (ICL)	Inadequacy of Device Shape and/or Size; Device Dislodged or Dislocated	Appropriate Clinical Signs, Symptoms, Conditions Term / Code Not Available	NA	Event Description: THE REPORTER INDICATED THAT A 12.6MM, VICMO12.6, -16.00 DIOPTER, IMPLANTABLE COLLAMER LENS WAS IMPLANTED INTO THE PATIENTS RIGHT EYE (OD) ON (B)(6) 2021. EXCESSIVE VAUL, LENS ROTATION NOT ASSOCIATED TO LOW VAULT AND SIGNIFICANT REDUCTION OF ICA WAS OBSERVED. ON (B)(6) 2021 IT WAS REPORTED THAT THE LENS WAS REPOSITIONED BUT IT DID NOT RESOLVED THE PROBLEM. ON (B)(6) 2021 THE LEN…	OD	Physician	10/13/2021	2021		Female
https://www.accessdata.fda.gov/scripts/cdrh/cfdocs/cfMAUDE/Detail.CFM?MDRFOI__ID=13896064&pc=MTA	2023826-2022-00890		Injury	STAAR SURGICAL COMPANY AG	2022-03-24 04:00:00	MTA	IMPLANTABLE COLLAMER LENS (ICL)	Inadequacy of Device Shape and/or Size; No Apparent Adverse Event	Appropriate Clinical Signs, Symptoms, Conditions Term / Code Not Available	NA	Event Description: THE REPORTER INDICATED THE SURGEON IMPLANTED A 13.2MM VICM13.2 IMPLANTABLE COLLAMER LENS, -04.00 DIOPTER, IN THE PATIENTS RIGHT EYE (OD), ON (B)(6) 2011. THE PLAN IS TO EXPLANT THE LENS DUE TO PROGRESSIVE MYOPIA. THE LENS REMAINED IMPLANTED. ADDITIONAL INFORMATION HAS BEEN REQUESTED BUT NONE HAS BEEN FORTHCOMING. Manufacturer Narrative: B5: THE LENS WAS EXPLANTED ON (B)(6) 2022…	OD	Physician	02/24/2022	2022		Female
https://www.accessdata.fda.gov/scripts/cdrh/cfdocs/cfMAUDE/Detail.CFM?MDRFOI__ID=10577515&pc=MTA	2023826-2020-02193	2018-07-01 04:00:00	Injury	STAAR SURGICAL COMPANY	2020-09-23 04:00:00	MTA	IMPLANTABLE COLLAMER LENS (ICL)	Inadequacy of Device Shape and/or Size; Patient-Device Incompatibility	Appropriate Clinical Signs, Symptoms, Conditions Term / Code Not Available	NA	Event Description: THE REPORTER INDICATED THAT THE SURGEON IMPLANTED A 13.2MM VICMO13.2 IMPLANTABLE COLLAMER LENS, -5.5 DIOPTER INTO THE PATIENT'S LEFT EYE (OS) ON (B)(6) 2018. ON (B)(6) 2020 THE LENS WAS EXCHANGED WITH A SHORTER LENS DUE TO EXCESSIVE VAULT AND SIGNIFICANT REDUCTION OF IRIDO-CORNEAL ANGLES (ICA). THE PROBLEM WAS RESOLVED. THE CAUSE OF THE EVENT IS REPORTED AS A PATIENT-RELATED FA…	OS		08/27/2020	2020	30
https://www.accessdata.fda.gov/scripts/cdrh/cfdocs/cfMAUDE/Detail.CFM?MDRFOI__ID=11697138&pc=MTA	2023826-2021-01094	2020-09-01 04:00:00	Injury	STAAR SURGICAL COMPANY	2021-04-20 04:00:00	MTA	IMPLANTABLE COLLAMER LENS (ICL)	Inadequacy of Device Shape and/or Size; Patient-Device Incompatibility	Appropriate Clinical Signs, Symptoms, Conditions Term / Code Not Available	N/A	Event Description: THE REPORTER INDICATED THE SURGEON IMPLANTED A 13.2MM VICMO13.2 IMPLANTABLE COLLAMER LENS, DIOPTER -7.0 INTO THE PATIENT'S RIGHT EYE (OD) ON (B)(6) 2020. ON (B)(6) 2020 THE LENS WAS EXPLANTED AND IN A SECOND SURGERY A SHORTER LENS WAS IMPLANTED DUE TO EXCESSIVE VAULT, SIGNIFICANT REDUCTION OF ENDOTHELIAL CELL COUNT/SIGNIFICANT ENDOTHELIAL CELL LOSS, AND THE CORNER OF THE EYE BE…	OD		03/25/2021	2021	31
https://www.accessdata.fda.gov/scripts/cdrh/cfdocs/cfMAUDE/Detail.CFM?MDRFOI__ID=13459218&pc=MTA	2023826-2022-00379	2022-01-07 05:00:00	Injury	STAAR SURGICAL COMPANY	2022-02-04 05:00:00	MTA	IMPLANTABLE COLLAMER LENS (ICL)	Inadequacy of Device Shape and/or Size; Patient-Device Incompatibility	Appropriate Clinical Signs, Symptoms, Conditions Term / Code Not Available	P030016	Event Description: THE REPORTER INDICATED THAT THE SURGEON IMPLANTED A 13.2MM MICL13.2 IMPLANTABLE COLLAMER LENS, -11.5 DIOPTER INTO THE PATIENT'S RIGHT (OD) EYE ON (B)(6) 2021. THE SURGEON REPORTS VAULTING AND CORNEAL TOUCH. ATTEMPTS TO OBTAIN ADDITIONAL INFORMATION HAVE NOT BEEN SUCCESSFUL. Manufacturer Narrative: SEX, WEIGHT, RACE, ETHNICITY: UNK. DATE OF EVENT: UNK. (B)(4). CLAIM# (B)(4). Man…	OD	Physician	01/10/2022	2022	21	Female
https://www.accessdata.fda.gov/scripts/cdrh/cfdocs/cfMAUDE/Detail.CFM?MDRFOI__ID=13459239&pc=MTA	2023826-2022-00378	2022-01-07 05:00:00	Injury	STAAR SURGICAL COMPANY	2022-02-04 05:00:00	MTA	IMPLANTABLE COLLAMER LENS (ICL)	Inadequacy of Device Shape and/or Size; Patient-Device Incompatibility	Appropriate Clinical Signs, Symptoms, Conditions Term / Code Not Available	P030016	Event Description: THE REPORTER INDICATED THAT THE SURGEON IMPLANTED A 13.2MM MICL13.2 IMPLANTABLE COLLAMER LENS, -11.0 DIOPTER INTO THE PATIENT'S LEFT (OS) EYE ON (B)(6) 2021. THE SURGEON REPORTS VAULTING AND CORNEAL TOUCH. ATTEMPTS TO OBTAIN ADDITIONAL INFORMATION HAVE NOT BEEN SUCCESSFUL. Manufacturer Narrative: SEX, WEIGHT, RACE, ETHNICITY: UNK. DATE OF EVENT: UNK. (B)(4). CLAIM# (B)(4). Manu…	OS	Physician	01/10/2022	2022	21	Female
https://www.accessdata.fda.gov/scripts/cdrh/cfdocs/cfMAUDE/Detail.CFM?MDRFOI__ID=16413989&pc=MTA	2023826-2023-00605	2023-01-24 05:00:00	Injury	STAAR SURGICAL COMPANY	2023-02-21 05:00:00	MTA	IMPLANTABLE COLLAMER LENS (ICL)	Inadequacy of Device Shape and/or Size; Patient-Device Incompatibility	Appropriate Clinical Signs, Symptoms, Conditions Term / Code Not Available	P030016	Event Description: THE REPORTER INDICATED THAT A 12.6MM VICM5 12.6 IMPLANTABLE COLLAMER LENS OF -3.00 DIOPTER WAS IMPLANTED INTO THE PATIENT'S LEFT EYE (OS) ON (B)(6) 2023. EXCESSIVE VAULT, SIGNIFICANT REDUCTION OF IRIDO CORNEAL ANGLES. EYE 'ACHE' DUE TO CILIARY BODY COMPRESSION WAS OBSERVED. ON (B)(6) 2023 THE LENS WAS REMOVED AND ON THE SAME DAY DIFFERENT SURGERY A REPLACEMENT LENS OF SHORTER L…	OS	Physician	01/27/2023	2023	28	Female
https://www.accessdata.fda.gov/scripts/cdrh/cfdocs/cfMAUDE/Detail.CFM?MDRFOI__ID=14178237&pc=MTA	2023826-2022-01223	2022-03-21 04:00:00	Injury	STAAR SURGICAL COMPANY	2022-04-21 04:00:00	MTA	IMPLANTABLE COLLAMER LENS (ICL)	Inadequacy of Device Shape and/or Size; Unintended Movement	Appropriate Clinical Signs, Symptoms, Conditions Term / Code Not Available		Event Description: THE REPORTER INDICATED THAT A 13.2MM MICL 13.2 IMPLANTABLE COLLAMER LENS OF -16.0 DIOPTER WAS IMPLANTED INTO THE PATIENTS LEFT EYE (OS) ON (B)(6) 2022. ON (B)(4) 2022 THE LENS WAS REMOVED DUE TO LOW VAULT. UPON REMOVAL OF THE INITIAL LENS IT WAS DETERMINED TO FLIPPED INSIDE THE EYE. REPORTER STATES THERE WAS DIFFICULTY TUCKING HAPTICS UNDER THE IRIS AS THE MANIPULATOR CONSTANTL…	OS	Other Health Care Professional	03/22/2022	2022	34	Female
https://www.accessdata.fda.gov/scripts/cdrh/cfdocs/cfMAUDE/Detail.CFM?MDRFOI__ID=11478820&pc=MTA	2023826-2021-00634	2020-11-13 05:00:00	Injury	STAAR SURGICAL COMPANY	2021-03-14 05:00:00	MTA	IMPLANTABLE COLLAMER LENS (ICL)	Misfocusing	Appropriate Clinical Signs, Symptoms, Conditions Term / Code Not Available	P030016	Event Description: THE REPORTER INDICATED THE SURGEON IMPLANTED A 13.2MM MICL13.2 IMPLANTABLE COLLAMER LENS, -05.00 DIOPTER, IN THE PATIENTS LEFT EYE (OS) ON (B)(6) 2020. THE LENS WAS EXPLANTED ON (B)(6) 2021 DUE TO PATIENT EXPERIENCED A REFRACTIVE SURPRISE AND MONOCULAR DIPLOPIA (DOUBLE VISION). THE LENS WAS EXCHANGED FOR A TORIC ICL LENS AND THE PROBLEM WAS RESOLVED. THE CAUSE OF THE EVENT WAS …	OS		02/22/2021	2021	35
https://www.accessdata.fda.gov/scripts/cdrh/cfdocs/cfMAUDE/Detail.CFM?MDRFOI__ID=11416102&pc=MTA	2023826-2021-00508	2021-02-10 05:00:00	Injury	STAAR SURGICAL COMPANY	2021-03-04 05:00:00	MTA	IMPLANTABLE COLLAMER LENS (ICL)	Misfocusing	Appropriate Clinical Signs, Symptoms, Conditions Term / Code Not Available	N/A	Event Description: THE REPORTER INDICATED THAT A 13.2MM, VICM6 13.2, -03.00 DIOPTER, IMPLANTABLE COLLAMER LENS WAS IMPLANTED INTO THE PATIENT'S RIGHT EYE (OD) ON (B)(6) 2020. PROBLEMS WITH DISTANCE UCVA POST 1 MONTH WAS OBSERVED. LENS REMAINS IMPLANTED. CAUSE OF THE EVENT IS REPORTED AS UNKNOWN, UCVA: 0.5, BCVA: 1.0 RX: 1.25/0.00/000". ADDITIONAL INFORMATION HAS BEEN REQUESTED BUT NONE HAS BEEN F…	OD		02/10/2021	2021	48
https://www.accessdata.fda.gov/scripts/cdrh/cfdocs/cfMAUDE/Detail.CFM?MDRFOI__ID=11416142&pc=MTA	2023826-2021-00509	2021-02-10 05:00:00	Injury	STAAR SURGICAL COMPANY	2021-03-04 05:00:00	MTA	IMPLANTABLE COLLAMER LENS (ICL)	Misfocusing	Appropriate Clinical Signs, Symptoms, Conditions Term / Code Not Available	N/A	Event Description: THE REPORTER INDICATED THAT A 13.7MM, VICM6 13.7, -02.50 DIOPTER, IMPLANTABLE COLLAMER LENS WAS IMPLANTED INTO THE PATIENT'S LEFT EYE (OS) ON (B)(6) 2021. PROBLEMS WITH DISTANCE UCVA POST 1 MONTH WAS OBSERVED. LENS REMAINS IMPLANTED. CAUSE OF THE EVENT IS REPORTED AS UNKNOWN, UCVA: 0.5, BCVA: 1.0 RX: 1.25/0.00/000". ADDITIONAL INFORMATION HAS BEEN REQUESTED BUT NONE HAS BEEN FO…	OS		02/10/2021	2021	48
https://www.accessdata.fda.gov/scripts/cdrh/cfdocs/cfMAUDE/Detail.CFM?MDRFOI__ID=15850227&pc=MTA	2023826-2022-04268	2021-09-03 04:00:00	Injury	STAAR SURGICAL COMPANY	2022-11-23 05:00:00	MTA	IMPLANTABLE COLLAMER LENS (ICL)	Misfocusing	Appropriate Clinical Signs, Symptoms, Conditions Term / Code Not Available	P030016	Event Description: THE REPORTER INDICATED THAT A 12.6MM VICMO 12.6 IMPLANTABLE COLLAMER LENS OF -8.5 DIOPTER WAS IMPLANTED INTO THE PATIENTS LEFT EYE (OS) ON (B)(6) 2021. REFRACTIVE SURPRISE WAS OBSERVED. "AFTER IMPLANTATION OF VICMO LENS, THE PATIENT COMPLAINED OF POOR VISION AND DOUBLE IMAGE, WHICH AFFECTED HIS LIFE. THE DOCTOR DECIDED TO CHANGE TO VTICMO LENS." ON (B)(6) 2022 THE LENS WAS EXCH…	OS	Physician	10/28/2022	2022	31	Female
https://www.accessdata.fda.gov/scripts/cdrh/cfdocs/cfMAUDE/Detail.CFM?MDRFOI__ID=16820442&pc=MTA	2023826-2023-01504	2022-06-18 04:00:00	Injury	STAAR SURGICAL COMPANY	2023-04-26 04:00:00	MTA	IMPLANTABLE COLLAMER LENS (ICL)	Misfocusing	Appropriate Clinical Signs, Symptoms, Conditions Term / Code Not Available	P030016	Event Description: THE REPORTER INDICATED THE SURGEON IMPLANTED A 12.6MM VICMO12.6 IMPLANTABLE COLLAMER LENS, -10.00 DIOPTER, IN THE PATIENTS RIGHT EYE (OD), ON (B)(6) 2022. THE LENS WAS EXPLANTED ON (B)(6) 2022 DUE TO THE PATIENT EXPERIENCED A REFRACTIVE SURPRISE AND REFRACTIVE CHANGE OVERTIME. THE LENS WAS REPLACED WITH A DIFFERENT MODEL (TORIC) BUT SAME LENGTH LENS AND THE PROBLEM WAS RESOLVED…	OD	Physician	03/31/2023	2023	26	Female
https://www.accessdata.fda.gov/scripts/cdrh/cfdocs/cfMAUDE/Detail.CFM?MDRFOI__ID=16301926&pc=MTA	2023826-2023-00388	2022-10-27 04:00:00	Injury	STAAR SURGICAL COMPANY	2023-02-04 05:00:00	MTA	IMPLANTABLE COLLAMER LENS (ICL)	Misfocusing	Appropriate Clinical Signs, Symptoms, Conditions Term / Code Not Available	P030016	Event Description: THE REPORTER INDICATED THAT A 13.2MM VICMO 13.2 IMPLANTABLE COLLAMER LENS OF -11.00 DIOPTER WAS IMPLANTED INTO THE PATIENT'S RIGHT EYE (OD) ON (B)(6) 2022. ON (B)(6) 2022 THE LENS WAS EXPLANTED DUE TO REFRACTIVE SURPRISE. REPORTEDLY THE PROBLEM WAS RESOLVED. CAUSE REPORTED AS UNKNOWN. Manufacturer Narrative: H3 - DEVICE EVALUATION: THE LENS WAS RETURNED DRY IN A MICROCENTRIFUGE…	OD	Physician	01/05/2023	2023	22	Male
https://www.accessdata.fda.gov/scripts/cdrh/cfdocs/cfMAUDE/Detail.CFM?MDRFOI__ID=15955610&pc=MTA	2023826-2022-04522	2022-11-23 05:00:00	Malfunction	STAAR SURGICAL COMPANY	2022-12-09 05:00:00	MTA	IMPLANTABLE COLLAMER LENS (ICL)	Misfocusing	Appropriate Clinical Signs, Symptoms, Conditions Term / Code Not Available	P030016	Event Description: THE REPORTER INDICATED THAT THE SURGEON IMPLANTED A 13.2MM VICM5_13.2; -10.50 DIOPTER IMPLANTABLE COLLAMER LENS INTO THE PATIENT'S LEFT EYE (OS) ON (B)(6) 2022. IT WAS REPORTED THAT THE PATIENT HAS "WRONG REFRACTION" (OVER CORRECTION). LENS REMAINS IMPLANTED. THE CAUSE OF THE EVENT WAS REPORTED AS USER ERROR AND NOTED THE DEVICE FAILED TO PERFORM AS INTENDED; "WRONG INITIAL REF…	OS	Physician	11/24/2022	2022	28	Female
https://www.accessdata.fda.gov/scripts/cdrh/cfdocs/cfMAUDE/Detail.CFM?MDRFOI__ID=11091320&pc=MTA	2023826-2020-03223	2020-11-27 05:00:00	Injury	STAAR SURGICAL COMPANY	2020-12-29 05:00:00	MTA	IMPLANTABLE COLLAMER LENS (ICL)	Misfocusing; Inadequacy of Device Shape and/or Size	Appropriate Clinical Signs, Symptoms, Conditions Term / Code Not Available	NA#S-P#NA	Event Description: THE REPORTER INDICATED THE SURGEON IMPLANTED A 13.2MM VICM5_13.2 IMPLANTABLE COLLAMER LENS, -13.50 DIOPTER IN THE PATIENTS LEFT EYE (OS) ON (B)(6) 2020. THE LENS WAS EXPLANTED ON (B)(6) 2020 DUE TO EXCESSIVE VAULTING (THE LENS VAULTED FORWARD), AND ANGLE CLOSURE. THE PATIENT EXPERIENCED A REFRACTIVE SURPRISE. THE LENS WAS EXCHANGED FOR A SHORTER LENS. THE CAUSE OF THE EVENT WAS…	OS		12/02/2020	2020	22
https://www.accessdata.fda.gov/scripts/cdrh/cfdocs/cfMAUDE/Detail.CFM?MDRFOI__ID=15442548&pc=MTA	2023826-2022-03180	2022-09-07 04:00:00	Injury	STAAR SURGICAL COMPANY	2022-09-16 04:00:00	MTA	IMPLANTABLE COLLAMER LENS (ICL)	Misfocusing; Patient-Device Incompatibility	Appropriate Clinical Signs, Symptoms, Conditions Term / Code Not Available	P030016	Event Description: THE REPORTER INDICATED THAT THE SURGEON IMPLANTED A 12.6MM VICMO12.6; -15.00 DIOPTER IMPLANTABLE COLLAMER LENS INTO THE PATIENT'S RIGHT EYE (OD) ON (B)(6) 2022. THE PATIENT WAS UNHAPPY ABOUT HER PERIPHERAL VISION AND WAS NAUSEOUS AND VOMITING FOR A MONTH. THE LENS WAS EXPLANTED ON (B)(6) 2022 AND THIS RESOLVED THE PROBLEM. THE CAUSE OF THE EVENT WAS REPORTED AS A PATIENT RELATE…	OD	Physician	09/07/2022	2022	43	Female
https://www.accessdata.fda.gov/scripts/cdrh/cfdocs/cfMAUDE/Detail.CFM?MDRFOI__ID=15442549&pc=MTA	2023826-2022-03181	2022-09-07 04:00:00	Injury	STAAR SURGICAL COMPANY	2022-09-16 04:00:00	MTA	IMPLANTABLE COLLAMER LENS (ICL)	Misfocusing; Patient-Device Incompatibility	Appropriate Clinical Signs, Symptoms, Conditions Term / Code Not Available	P030016	Event Description: THE REPORTER INDICATED THAT THE SURGEON IMPLANTED A 12.6MM VICMO12.6; -15.00 DIOPTER IMPLANTABLE COLLAMER LENS INTO THE PATIENT'S RIGHT LEFT (OS) ON (B)(6) 2022. THE PATIENT WAS UNHAPPY ABOUT HER PERIPHERAL VISION AND WAS NAUSEOUS AND VOMITING FOR A MONTH. THE LENS WAS EXPLANTED ON (B)(6) 2022 AND THIS RESOLVED THE PROBLEM. THE CAUSE OF THE EVENT WAS REPORTED AS A PATIENT RELAT…	OS	Physician	09/07/2022	2022	43	Female
https://www.accessdata.fda.gov/scripts/cdrh/cfdocs/cfMAUDE/Detail.CFM?MDRFOI__ID=15784668&pc=MTA	2023826-2022-04079	2018-03-27 04:00:00	Injury	STAAR SURGICAL COMPANY	2022-11-11 05:00:00	MTA	IMPLANTABLE COLLAMER LENS (ICL)	No Apparent Adverse Event	Appropriate Clinical Signs, Symptoms, Conditions Term / Code Not Available	P030016	Event Description: THE REPORTER INDICATED THE SURGEON IMPLANTED A 12.6MM MICL12.6 IMPLANTABLE COLLAMER LENS, -06.00 DIOPTER, IN THE PATIENTS RIGHT EYE (OD) ON (B)(6) 2018. THE LENS WAS REPORTED AS REFRACTIVE CHANGE OVERTIME AND REMAINED IMPLANTED. ADDITIONAL INFORMATION HAS BEEN REQUESTED BUT NONE HAS BEEN FORTHCOMING. Manufacturer Narrative: B5: THE LENS WAS REMOVED AND REPLACED ON (B)(6) 2022, …	OD	Physician	10/12/2022	2022	27	Female
https://www.accessdata.fda.gov/scripts/cdrh/cfdocs/cfMAUDE/Detail.CFM?MDRFOI__ID=12443631&pc=MTA	2023826-2021-03484	2021-01-01	Malfunction	STAAR SURGICAL COMPANY AG	2021-09-08	MTA	IMPLANTABLE COLLAMER LENS (ICL)	No Apparent Adverse Event	Appropriate Clinical Signs, Symptoms, Conditions Term / Code Not Available	NA	Event Description: THE REPORTER INDICATED THE SURGEON IMPLANTED A 12.6MM VICMO12.6 IMPLANTABLE COLLAMER LENS, -04.50 DIOPTER, INTO THE PATIENTS RIGHT EYE (OD) ON (B)(6) 2013. A REFRACTIVE CHANGE OVERTIME WAS NOTED AND THE LENS REMAINS IMPLANTED. THE CAUSE OF THE EVERNT WAS DUE TO PATIENT RELATED FACTOR. ADDITIONAL INFORMATION HAS BEEN REQUESTED BUT NONE HAS BEEN FORTHCOMING. Manufacturer Narrativ…	OD	Physician	08/11/2021	2021	30
https://www.accessdata.fda.gov/scripts/cdrh/cfdocs/cfMAUDE/Detail.CFM?MDRFOI__ID=12308430&pc=MTA	2023826-2021-03076	2021-04-01	Malfunction	STAAR SURGICAL COMPANY	2021-08-11	MTA	IMPLANTABLE COLLAMER LENS (ICL)	No Apparent Adverse Event	Appropriate Clinical Signs, Symptoms, Conditions Term / Code Not Available	N/A	Event Description: THE REPORTER INDICATED THAT A 13.2MM, VICM5_13.2, -10.00 DIOPTER, IMPLANTABLE COLLAMER LENS WAS IMPLANTED INTO THE PATIENT'S LEFT EYE (OS) ON (B)(6) 2020. SIGNIFICANT REDUCTION OF IRIDO-CORNEAL ANGLES WAS OBSERVED. LENS REMAINS IMPLANTED. REPORTEDLY, ANGLES NARROW, WILL CONTINUE TO OBSERVE. PER THE REPORTER ON (B)(6) 2021, NO TREATMENT OR INTERVENTION HAS BEEN DECIDED. ADDITION…	OS	Physician	07/20/2021	2021	44
https://www.accessdata.fda.gov/scripts/cdrh/cfdocs/cfMAUDE/Detail.CFM?MDRFOI__ID=13182561&pc=MTA	2023826-2022-00034	2021-12-17 05:00:00	Injury	STAAR SURGICAL COMPANY	2022-01-06 05:00:00	MTA	IMPLANTABLE COLLAMER LENS	No Apparent Adverse Event	Appropriate Clinical Signs, Symptoms, Conditions Term / Code Not Available	N/A	Event Description: THE REPORTER STATED THAT THE SURGEON IMPLANTED AN IMPLANTABLE COLLAMER LENS INTO THE PATIENT'S EYE. THE SURGEON REPORTS SPONTANEOUS MYDRIASIS SOME DAYS AFTER SURGERY. ATTEMPTS TO OBTAIN ADDITIONAL INFORMATION HAVE NOT BEEN SUCCESSFUL.Event Description: THE REPORTER STATED THAT THE SURGEON IMPLANTED AN IMPLANTABLE COLLAMER LENS INTO THE PATIENT'S EYE. THE SURGEON REPORTS SPONTAN…	OS	Other Health Care Professional	12/17/2021	2021	36	Female
https://www.accessdata.fda.gov/scripts/cdrh/cfdocs/cfMAUDE/Detail.CFM?MDRFOI__ID=14059267&pc=MTA	2023826-2022-01027	2022-01-18 05:00:00	Injury	STAAR SURGICAL COMPANY	2022-04-08 04:00:00	MTA	IMPLANTABLE COLLAMER LENS (ICL)	No Apparent Adverse Event	Appropriate Clinical Signs, Symptoms, Conditions Term / Code Not Available		Event Description: THE REPORTER INDICATED THAT THE SURGEON IMPLANTED A 12.6MM VICM5_12.6; -9.00 DIOPTER IMPLANTABLE COLLAMER LENS INTO THE PATIENT'S RIGHT EYE (OD) ON (B)(6) 2022 AS A REPLACEMENT LENS TO A PREVIOUS REFRACTIVE SURPRISE. IT WAS INDICATED THIS DID NOT RESOLVE THE PROBLEM, AND THE SURGEON REPORTS "VAULT CORRECT. HYPEROPIA REMAINS". LENS REMAINS IMPLANTED. SEE MFR# 2023826-2022-01026 …	OD	Physician	03/28/2022	2022	50	Female
https://www.accessdata.fda.gov/scripts/cdrh/cfdocs/cfMAUDE/Detail.CFM?MDRFOI__ID=15294323&pc=MTA	2023826-2022-02807	2022-02-22 05:00:00	Malfunction	STAAR SURGICAL COMPANY	2022-08-25 04:00:00	MTA	IMPLANTABLE COLLAMER LENS (ICL)	No Apparent Adverse Event	Appropriate Clinical Signs, Symptoms, Conditions Term / Code Not Available	P030016	Event Description: THE REPORTER INDICATED THAT A 13.7MM VICM5 13.7 OF -9.0 DIOPTER IMPLANTABLE COLLAMER LENS HAD LINEAR STAINS ON THE LENS. THE LENS WAS NOT IMPLANTED INTO THE PATIENTS LEFT EYE (OS). A REPLACEMENT LENS OF THE SAME MODEL/SIZE AND DIOPTER WAS IMPLANTED AND THE PROBLEM WAS RESOLVED. CAUSE REPORTED AS UNKNOWN. Manufacturer Narrative: LENS WORK ORDER SEARCH- NO SIMILAR COMPLAINT EVENT…	OS	Physician	07/26/2022	2022	22	Female
https://www.accessdata.fda.gov/scripts/cdrh/cfdocs/cfMAUDE/Detail.CFM?MDRFOI__ID=15294350&pc=MTA	2023826-2022-02806	2022-02-22 05:00:00	Malfunction	STAAR SURGICAL COMPANY	2022-08-25 04:00:00	MTA	IMPLANTABLE COLLAMER LENS (ICL)	No Apparent Adverse Event	Appropriate Clinical Signs, Symptoms, Conditions Term / Code Not Available	P030016	Event Description: THE REPORTER INDICATED THAT A 13.7MM VICM5 13.7 OF -10.50 DIOPTER IMPLANTABLE COLLAMER LENS HAD LINEAR STAINS ON THE LENS. THE LENS WAS NOT IMPLANTED INTO THE PATIENTS RIGHT EYE (OD). A REPLACEMENT LENS OF THE SAME MODEL/SIZE AND DIOPTER WAS IMPLANTED AND THE PROBLEM WAS RESOLVED. CAUSE REPORTED AS UNKNOWN. Manufacturer Narrative: INVESTIGATION TYPE: LENS WORK ORDER SEARCH- NO …	OD	Physician	07/26/2022	2022	22	Female
https://www.accessdata.fda.gov/scripts/cdrh/cfdocs/cfMAUDE/Detail.CFM?MDRFOI__ID=14750793&pc=MTA	2023826-2022-01925	2022-05-20 04:00:00	Malfunction	STAAR SURGICAL COMPANY	2022-06-20 04:00:00	MTA	IMPLANTABLE COLLAMER LENS (ICL)	No Apparent Adverse Event	Appropriate Clinical Signs, Symptoms, Conditions Term / Code Not Available	P030016	Event Description: THE REPORTER INDICATED THAT A 12.6MM VICM5 12.6 IMPLANTABLE COLLAMER LENS OF -7.00 DIOPTER WAS IMPLANTED INTO THE PATIENTS RIGHT EYE (OD) ON (B)(6) 2022. FOREIGN MATERIAL CONTAMINATION (PLASTIC PIECES) WERE OBSERVED. THE PLASTIC PIECES WERE REMOVED FROM INSIDE THE EYE AND THE PROBLEM WAS RESOLVED. CAUSE REPORTED AS UNKNOWN. Manufacturer Narrative: H6-DEVICE EVALUATION: A MICROC…	OD	Physician	05/23/2022	2022	26	Female
https://www.accessdata.fda.gov/scripts/cdrh/cfdocs/cfMAUDE/Detail.CFM?MDRFOI__ID=15584542&pc=MTA	2023826-2022-03619	2022-09-18 04:00:00	Malfunction	STAAR SURGICAL COMPANY	2022-10-11 04:00:00	MTA	IMPLANTABLE COLLAMER LENS (ICL)	No Apparent Adverse Event	Appropriate Clinical Signs, Symptoms, Conditions Term / Code Not Available	P030016	Event Description: THE REPORTER INDICATED THAT THE SURGEON IMPLANTED A 13.2MM VICMO13.2; -6.0 DIOPTER IMPLANTABLE COLLAMER LENS INTO THE PATIENT'S LEFT EYE (OS) ON (B)(6) 2022. THE SURGEON REPORTS THERE WAS FOREIGN MATTER ON THE ICL PERI-OPTICAL HOLE OF THE LENS AND FILAMENTOUS FOREIGN BODY IN THE VIAL. IT WAS INDICATED THE LENS REMAINS IMPLANTED AND THE PROBLEM IS RESOLVED. Manufacturer Narrativ…	OS	Physician	09/19/2022	2022	22	Female
https://www.accessdata.fda.gov/scripts/cdrh/cfdocs/cfMAUDE/Detail.CFM?MDRFOI__ID=15781982&pc=MTA	2023826-2022-04000	2022-10-01 04:00:00	Malfunction	STAAR SURGICAL COMPANY	2022-11-11 05:00:00	MTA	IMPLANTABLE COLLAMER LENS (ICL)	No Apparent Adverse Event	Appropriate Clinical Signs, Symptoms, Conditions Term / Code Not Available	P030016	Event Description: THE REPORTER INDICATED THAT A 12.1MM VICMO 12.1 IMPLANTABLE COLLAMER LENS OF -9.5 DIOPTER WAS IMPLANTED INTO THE PATIENTS LEFT EYE (OS) ON (B)(6)2022 . DOCTOR FOUND THERE WERE FLOCCULENT FLOATING OBJECTS ON THE SURFACE OF THE LENS DURING THE SURGERY. AT FOLLOW UP CHECK UPS THE FOREIGN BODY WAS STILL THERE. SINCE THE PATIENT IS IN NORMAL CONDITION, THE DOCTOR DECIDED NOT TO REPL…	OS	Physician	10/14/2022	2022	34	Female
https://www.accessdata.fda.gov/scripts/cdrh/cfdocs/cfMAUDE/Detail.CFM?MDRFOI__ID=17669074&pc=MTA	2023826-2023-03742	2023-07-26 04:00:00	Injury	STAAR SURGICAL COMPANY	2023-09-01 04:00:00	MTA	IMPLANTABLE COLLAMER LENS (ICL)	No Apparent Adverse Event	Appropriate Clinical Signs, Symptoms, Conditions Term / Code Not Available	P030016	Event Description: THE REPORTER INDICATED THAT THE SURGEON IMPLANTED A 13.2MM VICMO13.2, -18.0 DIOPTER, IMPLANTABLE COLLAMER LENS INTO THE PATIENT'S RIGHT EYE (OD) ON (B)(6) 2023. THE LENS TORE DURING INJECTION/DELIVERY INTO THE EYE. THERE WAS PATIENT CONTACT (LENS TOUCHED THE EYE) WITH NO PATIENT INJURY. THE LENS WAS EXCHANGED ON (B)(6) 2023. THIS RESOLVED THE PROBLEM. CAUSE OF THE EVENT IS REPO…	OD	Physician	08/17/2023	2023	41	Female
https://www.accessdata.fda.gov/scripts/cdrh/cfdocs/cfMAUDE/Detail.CFM?MDRFOI__ID=17885023&pc=MTA	2023826-2023-04311	2023-08-28 04:00:00	Injury	STAAR SURGICAL COMPANY	2023-10-06 04:00:00	MTA	IMPLANTABLE COLLAMER LENS (ICL)	No Apparent Adverse Event	Appropriate Clinical Signs, Symptoms, Conditions Term / Code Not Available	P030016	Event Description: THE REPORTER INDICATED THE SURGEON IMPLANTED A 12.6MM VICM5_12.6 IMPLANTABLE COLLAMER LENS, -11.50 DIOPTER, INTO THE PATIENTS LEFT EYE (OS) ON (B)(6) 2023. THE PATIENT EXPERIENCED PIGMENT DISPERSION AND DILATED PUPIL (NON REACTIVE). THE LENS REMAINED IMPLANTED. CAUSE OF THE EVENT WAS UNKNOWN. ADDITIONAL INFORMATION HAS BEEN REQUESTED BUT NONE HAS BEEN FORTHCOMING. Manufacturer …	OS	Physician	09/11/2023	2023	29	Female
https://www.accessdata.fda.gov/scripts/cdrh/cfdocs/cfMAUDE/Detail.CFM?MDRFOI__ID=13538837&pc=MTA	2023826-2022-00526		Malfunction	STAAR SURGICAL COMPANY	2022-02-15 05:00:00	MTA	IMPLANTABLE COLLAMER LENS (ICL)	No Apparent Adverse Event	Appropriate Clinical Signs, Symptoms, Conditions Term / Code Not Available		Event Description: THE REPORTER INDICATED THAT THE SURGEON IMPLANTED A 12.6MM VICMO12.6; -15.5 DIOPTER IMPLANTABLE COLLAMER LENS INTO THE PATIENT'S LEFT EYE (OS) ON (B)(6) 2021; AS A REPLACEMENT LENS TO A PREVIOUS LENS TEAR/BREAK DURING LOADING ISSUE. IT WAS INDICATED THAT THE PATIENT IS UNHAPPY WITH THE POSTOPERATIVE RESULTS AND UCVA IS 20/50. LENS REMAINS IMPLANTED. ATTEMPTS TO OBTAIN ADDITIONA…	OS	Physician	01/21/2022	2022		Male
https://www.accessdata.fda.gov/scripts/cdrh/cfdocs/cfMAUDE/Detail.CFM?MDRFOI__ID=14734242&pc=MTA	2023826-2022-01853		Malfunction	STAAR SURGICAL COMPANY	2022-06-17 04:00:00	MTA	IMPLANTABLE COLLAMER LENS (ICL)	No Apparent Adverse Event	Appropriate Clinical Signs, Symptoms, Conditions Term / Code Not Available	P030016	Event Description: THE REPORTER INDICATED THE SURGEON IMPLANTED A 13.2MM VICM13.2 IMPLANTABLE COLLAMER LENS, -03.00 DIIOPTER, IN THE PATIENTS LEFT EYE (OS), ON (B)(6) 2012. THE REPORTER INDICATED THE LENS WILL BE EXPLANTED/EXCHANGED DUE TO PROGRESSIVE MYOPIA AND ASTIGMATISM. THE LENS REMAINED IMPLANTED. ADDITIONAL INFORMATION HAS BEEN REQUESTED BUT NONE HAS BEEN FORTHCOMING. Manufacturer Narrativ…	OS	Physician	05/18/2022	2022		Male
https://www.accessdata.fda.gov/scripts/cdrh/cfdocs/cfMAUDE/Detail.CFM?MDRFOI__ID=15129629&pc=MTA	2023826-2022-02449		Injury	STAAR SURGICAL COMPANY	2022-07-29 04:00:00	MTA	IMPLANTABLE COLLAMER LENS (ICL)	No Apparent Adverse Event	Appropriate Clinical Signs, Symptoms, Conditions Term / Code Not Available	P030016	Event Description: THE REPORTER REPORTED A 13.2MM VICMO13.2 -15.00 DIOPTER IMPLANTABLE COLLAMER LENS. THE REPORTER STATED "DEFECTIVE OPTIC, USED BACKUP LENS". PATIENT CONTACT IS UNKNOWN. IF ADDITIONAL INFORMATION IS RECEIVED A SUPPLEMENTAL MEDWATCH REPORT WILL BE SUBMITTED. Manufacturer Narrative: (B)(4). LENS WORK ORDER SEARCH: NO SIMILAR COMPLAINT TYPE EVENTS REPORTED FOR UNITS WITHIN THE SAME …	NA	Physician	06/29/2022	2022
https://www.accessdata.fda.gov/scripts/cdrh/cfdocs/cfMAUDE/Detail.CFM?MDRFOI__ID=15397093&pc=MTA	2023826-2022-03020		Malfunction	STAAR SURGICAL COMPANY	2022-09-09 04:00:00	MTA	IMPLANTABLE COLLAMER LENS (ICL)	No Apparent Adverse Event	Appropriate Clinical Signs, Symptoms, Conditions Term / Code Not Available	P030016	Event Description: THE REPORTER INDICATED THAT THEY ORDERED A 12.6MM VICM5 12.6 OF -2.50 DIOPTER AND RECEIVED A 13.2MM VICM5 13.2 OF -2.50 DIOPTER. THE LENS WAS NOT IMPLANTED INTO THE PATIENTS LEFT EYE (OS). IF ADDITIONAL INFORMATION IS RECEIVED A SUPPLEMENTAL MEDWATCH REPORT WILL BE SUBMITTED. Manufacturer Narrative: H3 - DEVICE EVALUATION: LENS BOX RETURNED UNOPENED. LENS BOX WRAP WAS INTACT, B…	OS	Physician	08/10/2022	2022
https://www.accessdata.fda.gov/scripts/cdrh/cfdocs/cfMAUDE/Detail.CFM?MDRFOI__ID=16417451&pc=MTA	2023826-2023-00610		Malfunction	STAAR SURGICAL COMPANY	2023-02-22 05:00:00	MTA	IMPLANTABLE COLLAMER LENS (ICL)	No Apparent Adverse Event	Appropriate Clinical Signs, Symptoms, Conditions Term / Code Not Available	P030016	Event Description: THE REPORTER INDICATED THAT A 12.1MM VICM5 12.1 IMPLANTABLE COLLAMER LENS OF -6.0 DIOPTER WAS IMPLANTED INTO THE PATIENTS LEFT EYE (OS) ON (B)(6)2022 AS AN EXCHANGE LENS TO RESOLVE EXCESSIVE VAULT. ALTHOUGH HE PROBLEM OF EXCESSIVE VAULT WAS RESOLVED PATIENT HAS POOR NAKED EYE VISION DUE TO INDUCED ASTIGMATISM. NO ADDITIONAL INFORMATION HAS BEEN PROVIDED. IF ADDITIONAL INFORMATI…	OS	Physician	01/29/2023	2023		Female
https://www.accessdata.fda.gov/scripts/cdrh/cfdocs/cfMAUDE/Detail.CFM?MDRFOI__ID=17792198&pc=MTA	2023826-2023-03988		Injury	STAAR SURGICAL COMPANY	2023-09-21 04:00:00	MTA	IMPLANTABLE COLLAMER LENS (ICL)	No Apparent Adverse Event	Appropriate Clinical Signs, Symptoms, Conditions Term / Code Not Available	P030016	Event Description: THE REPORTER INDICATED THE SURGEON IMPLANTED A 12.6MM VICM5_12.6 IMPLANTABLE COLLAMER LENS, -10.50 DIOPTER, INTO THE PATIENTS RIGHT EYE (OD) ON (B)(6) 2023. POST-OP THERE WAS 1+ PIGMENT IN ANTERIOR CHAMBER, IRIS WAS RESOLVING. THE PROBLEM WAS RESOLVED. THE LENS REMAINED IMPLANTED. Manufacturer Narrative: H6: HEALTH IMPACT- CLINICAL CODE: 4581 - PIGMENT IN AC. H6 - WORK ORDER SE…	OD	Other Health Care Professional	08/31/2023	2023		Female
https://www.accessdata.fda.gov/scripts/cdrh/cfdocs/cfMAUDE/Detail.CFM?MDRFOI__ID=17813875&pc=MTA	2023826-2023-03989		Injury	STAAR SURGICAL COMPANY	2023-09-25 04:00:00	MTA	IMPLANTABLE COLLAMER LENS (ICL)	No Apparent Adverse Event	Appropriate Clinical Signs, Symptoms, Conditions Term / Code Not Available	P030016	Event Description: THE REPORTER INDICATED THE SURGEON IMPLANTED A 12.6MM VICM5_12.6 IMPLANTABLE COLLAMER LENS, -10.00 DIOPTER, INTO THE PATIENTS LEFT EYE (OS) ON (B)(6) 2023. POST-OP THERE WAS 1+ PIGMENT IN ANTERIOR CHAMBER, IRIS WAS RESOLVING. THE PROBLEM WAS RESOLVED. THE LENS REMAINED IMPLANTED. Manufacturer Narrative: H6 - WORK ORDER SEARCH: NO SIMILAR COMPLAINT WAS REPORTED FOR UNITS WITHIN …	OS	Other Health Care Professional	08/31/2023	2023		Female
https://www.accessdata.fda.gov/scripts/cdrh/cfdocs/cfMAUDE/Detail.CFM?MDRFOI__ID=17954491&pc=MTA	2023826-2023-04628		Malfunction	STAAR SURGICAL COMPANY	2023-10-17 04:00:00	MTA	IMPLANTABLE COLLAMER LENS (ICL)	No Apparent Adverse Event	Appropriate Clinical Signs, Symptoms, Conditions Term / Code Not Available	P030016	Event Description: THE REPORTER INDICATED THAT A 13.2MM VICM5_13.2 IMPLANTABLE COLLAMER LENS OF -11.00 DIOPTER WAS IMPLANTED INTO THE PATIENTS RIGHT EYE (OD) ON (B)(6) 2023. MILD SHALLOWING OF THE ACD WAS REPORTED, HOWEVER IT WAS ALSO REPORTED THAT MEDICAL OR SURGICAL INTERVENTION IS NOT NECESSARY. "LENS SIZE A BIT OFF" WAS REPORTED FOR CAUSE OF EVENT. THE REPORTER STATED THAT THE PATIENTS CURREN…	OD	Physician	09/21/2023	2023		Male
https://www.accessdata.fda.gov/scripts/cdrh/cfdocs/cfMAUDE/Detail.CFM?MDRFOI__ID=13896093&pc=MTA	2023826-2022-00891		Malfunction	STAAR SURGICAL COMPANY AG	2022-03-24 04:00:00	MTA	IMPLANTABLE COLLAMER LENS (ICL)	No Apparent Adverse Event	Appropriate Clinical Signs, Symptoms, Conditions Term / Code Not Available	NA	Event Description: THE REPORTER INDICATED THE SURGEON IMPLANTED A 13.2MM VICM13.2 IMPLANTABLE COLLAMER LENS, -05.00 DIOPTER, IN THE PATIENTS LEFT EYE (OS), ON (B)(6) 2011. THE PLAN IS TO EXPLANT THE LENS DUE TO PROGRESSIVE MYOPIA. THE LENS REMAINED IMPLANTED. ADDITIONAL INFORMATION HAS BEEN REQUESTED BUT NONE HAS BEEN FORTHCOMING. Manufacturer Narrative: SEX: UNK. WEIGHT: UNK. ETHNICITY: UNK. RAC…	OS	Physician	02/24/2022	2022
https://www.accessdata.fda.gov/scripts/cdrh/cfdocs/cfMAUDE/Detail.CFM?MDRFOI__ID=17725921&pc=MTA	2023826-2023-04005	2003-08-29 04:00:00	Injury	STAAR SURGICAL COMPANY	2023-09-11 04:00:00	MTA	IMPLANTABLE COLLAMER LENS (ICL)	Off-Label Use; Adverse Event Without Identified Device or Use Problem	Appropriate Clinical Signs, Symptoms, Conditions Term / Code Not Available	P030016	Event Description: THE REPORTER INDICATED THAT THE SURGEON IMPLANTED A 12.6MM VICMO12.6; -5.0 DIOPTER IMPLANTABLE COLLAMER LENS INTO THE PATIENT'S RIGHT EYE (OD) ON (B)(6) 2023 . THE PATIENT EXPERIENCED SIGNIFICANT REDUCTION OF IRIDO-CORNEAL ANGLES. ON (B)(6) 2023 THE LENS WAS EXCHANGED WITH A SHORTER LENGTH LENS AND THIS RESOLVED THE PROBLEM. THE CAUSE OF THE EVENT WAS REPORTED AS UNKNOWN. Manuf…	OD	Physician	09/08/2023	2023	9	Female
https://www.accessdata.fda.gov/scripts/cdrh/cfdocs/cfMAUDE/Detail.CFM?MDRFOI__ID=11860704&pc=MTA	2023826-2021-01598	2021-02-06	Injury	STAAR SURGICAL COMPANY	2021-05-20	MTA	IMPLANTABLE COLLAMER LENS (ICL)	Off-Label Use; Adverse Event Without Identified Device or Use Problem	Appropriate Clinical Signs, Symptoms, Conditions Term / Code Not Available	N/A	Event Description: THE REPORTER INDICATED THE SURGEON IMPLANTED A 12.6MM VICM5_12.6 IMPLANTABLE COLLAMER LENS, DIOPTER -5.00 INTO THE PATIENT'S LEFT EYE (OS) ON (B)(6) 2021. ON (B)(6) 2021 THE LENS WAS EXPLANTED DUE TO THE PATIENT WAS NOT SATISFIED WITH HIS POSTOPERATIVE VISUAL ACUITY. THE CAUSE OF THE EVENT IS REPORTED AS UNKNOWN. Manufacturer Narrative: THIS PRODUCT IS NOT MARKETED IN THE US. H…	OS	Physician	04/29/2021	2021	53
https://www.accessdata.fda.gov/scripts/cdrh/cfdocs/cfMAUDE/Detail.CFM?MDRFOI__ID=11860730&pc=MTA	2023826-2021-01597	2021-02-06	Injury	STAAR SURGICAL COMPANY	2021-05-20	MTA	IMPLANTABLE COLLAMER LENS (ICL)	Off-Label Use; Adverse Event Without Identified Device or Use Problem	Appropriate Clinical Signs, Symptoms, Conditions Term / Code Not Available	N/A	Event Description: THE REPORTER INDICATED THE SURGEON IMPLANTED A 12.6MM VICM5_12.6 IMPLANTABLE COLLAMER LENS, DIOPTER -6.00 INTO THE PATIENT'S RIGHT EYE (OD) ON (B)(6) 2021. ON (B)(6) 2021 THE LENS WAS EXPLANTED DUE TO THE PATIENT WAS NOT SATISFIED WITH HIS POSTOPERATIVE VISUAL ACUITY. THE CAUSE OF THE EVENT IS REPORTED AS UNKNOWN. Manufacturer Narrative: WEIGHT, ETHNICITY, RACE-UNK. THIS PRODUC…	OD	Physician	04/29/2021	2021	53
https://www.accessdata.fda.gov/scripts/cdrh/cfdocs/cfMAUDE/Detail.CFM?MDRFOI__ID=18234535&pc=MTA	2023826-2023-05297	2023-07-25 04:00:00	Injury	STAAR SURGICAL COMPANY	2023-11-29 05:00:00	MTA	IMPLANTABLE COLLAMER LENS (ICL)	Off-Label Use; Adverse Event Without Identified Device or Use Problem	Appropriate Clinical Signs, Symptoms, Conditions Term / Code Not Available	P030016	Event Description: THE REPORTER INDICATED THE SURGEON IMPLANTED A 12.6MM VICM5_12.6 IMPLANTABLE COLLAMER LENS, -08.50 DIOPTER, INTO THE PATIENTS RIGHT EYE (OD) ON (B)(6) 2022. THE SURGEON PERFORMED AN LRI TO CORRECT ASTIGMATISM BUT THE ASTIGMATISM WAS NOT FULLY CORRECTED. THE LENS WAS REMOVED ON (B)(6) 2023 DUE TO THE PATIENT WAS DISSATISFIED WITH VISUAL ACUITY. THE LENS WAS REPLACED WITH A DIFFE…	OD	Physician	11/07/2023	2023	25	Male
https://www.accessdata.fda.gov/scripts/cdrh/cfdocs/cfMAUDE/Detail.CFM?MDRFOI__ID=17725918&pc=MTA	2023826-2023-04006	2023-09-02 04:00:00	Injury	STAAR SURGICAL COMPANY	2023-09-11 04:00:00	MTA	IMPLANTABLE COLLAMER LENS (ICL)	Off-Label Use; Adverse Event Without Identified Device or Use Problem	Appropriate Clinical Signs, Symptoms, Conditions Term / Code Not Available	P030016	Event Description: THE REPORTER INDICATED THAT THE SURGEON IMPLANTED A 12.6MM VICMO12.6; -5.0 DIOPTER IMPLANTABLE COLLAMER LENS INTO THE PATIENT'S LEFT EYE (OS) ON (B)(6) 2023. THE PATIENT EXPERIENCED SIGNIFICANT REDUCTION OF IRIDO-CORNEAL ANGLES. ON (B)(6) 2023, THE LENS WAS EXCHANGED WITH A SHORTER LENGTH LENS AND THIS RESOLVED THE PROBLEM. THE CAUSE OF THE EVENT WAS REPORTED AS UNKNOWN. Manufa…	OS	Physician	09/08/2023	2023	29	Female
https://www.accessdata.fda.gov/scripts/cdrh/cfdocs/cfMAUDE/Detail.CFM?MDRFOI__ID=13674056&pc=MTA	2023826-2022-00747		Injury	STAAR SURGICAL COMPANY	2022-03-04 05:00:00	MTA	IMPLANTABLE COLLAMER LENS (ICL)	Off-Label Use; Adverse Event Without Identified Device or Use Problem	Appropriate Clinical Signs, Symptoms, Conditions Term / Code Not Available	N/A	Event Description: THE REPORTER INDICATED THAT A 12.6MM VICM5 12.6 IMPLANTABLE COLLAMER LENS OF -12.5 DIOPTER WAS IMPLANTED INTO THE PATIENTS RIGHT EYE (OD) ON (B)(6) 2022 AS AN EXCHANGE LENS TO RESOLVE EXCESSIVE VAULT. AFTER LENS IMPLANTATION THE VAULT IS GOOD, BUT THE PATIENT HAS SLIGHT IRIS TIDS. THIS IS DUE TO INTRAOPERATIVE FLOPPY IRIS SYNDROME. THE REPORTER STATES THAT "THE PATIENT DID NOT …	OD	Physician	02/15/2022	2022		Male
https://www.accessdata.fda.gov/scripts/cdrh/cfdocs/cfMAUDE/Detail.CFM?MDRFOI__ID=14639426&pc=MTA	2023826-2022-01776		Injury	STAAR SURGICAL COMPANY	2022-06-08 04:00:00	MTA	IMPLANTABLE COLLAMER LENS (ICL)	Off-Label Use; Adverse Event Without Identified Device or Use Problem	Appropriate Clinical Signs, Symptoms, Conditions Term / Code Not Available	P030016	Event Description: THE REPORTER INDICATED THE SURGEON IMPLANTED A 13.2MM VICMO13.2 IMPLANTABLE COLLAMER LENS, -10.00 DIOPTER, IN THE PATIENTS RIGHT EYE (OD), ON (B)(6) 2022. THE LENS WAS REPORTED AS HAVING A COMPLICATION DUE TO VISCO. THE PATIENT HAD AN ISCHEMIC OPTIC NEUROPATHY DUE TO VISCO. AT SOME POINT THE PATIENT ONLY HAD LIGHT PERCEPTION BUT IS NOW RECOVERING. PATIENT HAS MYDRIASIS DUE TO I…	OD	Physician	05/12/2022	2022		Male
https://www.accessdata.fda.gov/scripts/cdrh/cfdocs/cfMAUDE/Detail.CFM?MDRFOI__ID=17391267&pc=MTA	2023826-2023-03042		Injury	STAAR SURGICAL COMPANY	2023-07-25 04:00:00	MTA	IMPLANTABLE COLLAMER LENS (ICL)	Off-Label Use; Adverse Event Without Identified Device or Use Problem	Appropriate Clinical Signs, Symptoms, Conditions Term / Code Not Available	P030016	Event Description: THE REPORTER INDICATED THAT A 12.6MM VICM5 12.6, -13.00 DIOPTER, IMPLANTABLE COLLAMER LENS WAS IMPLANTED AND REMOVED INTRAOPERATIVELY ON (B)(6) 2023 FROM PATIENT'S RIGHT EYE (OD) DUE TO PUPIL DISCLOSURE AND CATARACT. PHACO-EMULSIFICATION(CATARACT SURGERY) & IOL IMPLANTATION PERFORMED. THE PROBLEM WAS RESOLVED. CAUSE OF THE EVENT IS REPORTED AS USER ERROR AND THE DEVICE DID NOT …	OD	Physician	07/07/2023	2023		Male
https://www.accessdata.fda.gov/scripts/cdrh/cfdocs/cfMAUDE/Detail.CFM?MDRFOI__ID=16864757&pc=MTA	2023826-2023-01596	2023-03-06 05:00:00	Injury	STAAR SURGICAL COMPANY	2023-05-03 04:00:00	MTA	IMPLANTABLE COLLAMER LENS (ICL)	Off-Label Use; Adverse Event Without Identified Device or Use Problem; No Apparent Adverse Event	Appropriate Clinical Signs, Symptoms, Conditions Term / Code Not Available	P030016	Event Description: THE REPORTER INDICATED THE SURGEON IMPLANTED A 12.6MM VICMO12.6 IMPLANTABLE COLLAMER LENS, -09.50 DIOPTER, IN THE PATIENTS RIGHT EYE (OD), ON (B)(6) 2013. THE LENS WAS REPORTED AS REFRACTIVE CHANGE OVERTIME AND REMAINED IMPLANTED. ADDITIONAL INFORMATION HAS BEEN REQUESTED BUT NONE HAS BEEN FORTHCOMING. Manufacturer Narrative: HEALTH IMPACT- CLINICAL CODE: 4581 - REFRACTIVE CHAN…	OD	Physician	04/06/2023	2023	28	Male
https://www.accessdata.fda.gov/scripts/cdrh/cfdocs/cfMAUDE/Detail.CFM?MDRFOI__ID=16871546&pc=MTA	2023826-2023-01597	2023-03-06 05:00:00	Injury	STAAR SURGICAL COMPANY	2023-05-04 04:00:00	MTA	IMPLANTABLE COLLAMER LENS (ICL)	Off-Label Use; Adverse Event Without Identified Device or Use Problem; No Apparent Adverse Event	Appropriate Clinical Signs, Symptoms, Conditions Term / Code Not Available	P030016	Event Description: THE REPORTER INDICATED THE SURGEON IMPLANTED A 13.2MM VICMO13.2 IMPLANTABLE COLLAMER LENS, -11.00 DIOPTER, IN THE PATIENTS LEFT EYE (OS), ON (B)(6) 2013. THE LENS WAS REPORTED AS REFRACTIVE CHANGE OVERTIME AND REMAINED IMPLANTED. ADDITIONAL INFORMATION HAS BEEN REQUESTED BUT NONE HAS BEEN FORTHCOMING. Manufacturer Narrative: B5: THE LENS WAS REMOVED AND REPLACED ON (B)(6) 2023.…	OS	Physician	04/06/2023	2023	28	Male
https://www.accessdata.fda.gov/scripts/cdrh/cfdocs/cfMAUDE/Detail.CFM?MDRFOI__ID=11135886&pc=MTA	2023826-2021-00057	2020-09-06 04:00:00	Injury	STAAR SURGICAL COMPANY	2021-01-07 05:00:00	MTA	IMPLANTABLE COLLAMER LENS (ICL)	Off-Label Use; Inadequacy of Device Shape and/or Size	Appropriate Clinical Signs, Symptoms, Conditions Term / Code Not Available	N/A	Event Description: THE REPORTER INDICATED THE SURGEON IMPLANTED A 13.2MM VICMO13.2 IMPLANTABLE COLLAMER LENS, DIOPTER -11.5 INTO THE PATIENT'S LEFT EYE (OS) ON (B)(6) 2020. ON (B)(6) 2020 THE LENS WAS EXCHANGED WITH A SHORTER LENS DUE TO EXCESSIVE VAULT AND SIGNIFICANT REDUCTION OF IRIDO-CORNEAL ANGLES (ICA) AND THE PROBLEM WAS RESOLVED. THE CAUSE OF THE EVENT IS REPORTED AS UNKNOWN. Manufacturer…	OD		12/14/2020	2020	22
https://www.accessdata.fda.gov/scripts/cdrh/cfdocs/cfMAUDE/Detail.CFM?MDRFOI__ID=12242102&pc=MTA	2023826-2021-02923	2020-12-01	Injury	STAAR SURGICAL COMPANY	2021-07-28	MTA	IMPLANTABLE COLLAMER LENS (ICL)	Off-Label Use; Inadequacy of Device Shape and/or Size	Appropriate Clinical Signs, Symptoms, Conditions Term / Code Not Available	NA	Event Description: THE REPORTER INDICATED THE SURGEON IMPLANTED A 13.2MM VICMO13.2 IMPLANTABLE COLLAMER LENS, -06.00 DIOPTER, IN THE PATIENTS RIGHT EYE (OD), ON (B)(6) 2020. THE LENS WAS EXPLANTED ON (B)(6) 2020 DUE TO EXCESSIVE VAULTING AND SIGNIFICANT REDUCTION OF IRIDO-CORNEAL ANGLES. THE LENS WAS EXCHANGED FOR A SHORTER LENS AND THE PROBLEM WAS RESOLVED. THE CAUSE OF THE EVENT WAS UNKNOWN. Ma…	OD	Physician	06/29/2021	2021	23
https://www.accessdata.fda.gov/scripts/cdrh/cfdocs/cfMAUDE/Detail.CFM?MDRFOI__ID=12246275&pc=MTA	2023826-2021-02924	2020-12-01 05:00:00	Injury	STAAR SURGICAL COMPANY	2021-07-29 04:00:00	MTA	IMPLANTABLE COLLAMER LENS (ICL)	Off-Label Use; Inadequacy of Device Shape and/or Size	Appropriate Clinical Signs, Symptoms, Conditions Term / Code Not Available	NA	Event Description: THE REPORTER INDICATED THE SURGEON IMPLANTED A 13.2MM VICMO13.2 IMPLANTABLE COLLAMER LENS, -05.50 DIOPTER, IN THE PATIENTS LEFT EYE (OS), ON (B)(6) 2020. THE LENS WAS EXPLANTED ON (B)(6) 2020 DUE TO EXCESSIVE VAULTING AND SIGNIFICANT REDUCTION OF IRIDO-CORNEAL ANGLES. THE LENS WAS EXCHANGED FOR A SHORTER LENS AND THE PROBLEM WAS RESOLVED. THE CAUSE OF THE EVENT WAS UNKNOWN. Man…	OS	Physician	06/29/2021	2021	23	Female
https://www.accessdata.fda.gov/scripts/cdrh/cfdocs/cfMAUDE/Detail.CFM?MDRFOI__ID=11891206&pc=MTA	2023826-2021-01704	2020-12-31	Malfunction	STAAR SURGICAL COMPANY	2021-05-26	MTA	IMPLANTABLE COLLAMER LENS (ICL)	Off-Label Use; Inadequacy of Device Shape and/or Size	Appropriate Clinical Signs, Symptoms, Conditions Term / Code Not Available	NA	Event Description: THE REPORTER INDICATED THAT A 12.6MM ,VICMO12.6, -8.50 DIOPTER, IMPLANTABLE COLLAMER LENS WAS IMPLANTED INTO THE PATIENTS RIGHT EYE (OD) ON (B)(6) 2020. THE LENS WAS REMOVED AND REPLACED FOR A SHORTER LENGTH LENS WITHIN THE SAME SURGERY DUE TO EXCESSIVE VAULT AND SIGNIFICANT REDUCTION OF IRIDO-CORNEAL ANGLES. IT WAS REPORTED THAT THE PROBLEM RESOLVED. CAUSE OF EVENT WAS REPORTE…	OD	Physician	04/30/2021	2021	38
https://www.accessdata.fda.gov/scripts/cdrh/cfdocs/cfMAUDE/Detail.CFM?MDRFOI__ID=11522549&pc=MTA	2023826-2021-00684	2021-01-24 05:00:00	Injury	STAAR SURGICAL COMPANY	2021-03-19 04:00:00	MTA	IMPLANTABLE COLLAMER LENS (ICL)	Off-Label Use; Inadequacy of Device Shape and/or Size	Appropriate Clinical Signs, Symptoms, Conditions Term / Code Not Available	NA	Event Description: THE REPORTER INDICATED THAT A 12.6MM, VICMO12.6, -5.0 DIOPTER, IMPLANTABLE COLLAMER LENS WAS IMPLANTED INTO THE PATIENTS RIGHT EYE (OD) ON (B)(6) 2021. ON (B)(6) 2021 THE LENS WAS EXCHANGED FOR A SHORTER LENGTH LENS DUE TO EXCESSIVE VAULT AND SIGNIFICANT REDUCTION OF ENDOTHELIAL CELL COUNT OR SIGNIFICANT ENDOTHELIAL CELL LOSS. THIS EXCHANGE RESOLVED THE PROBLEM. CAUSE OF THE EV…	OD		02/17/2021	2021	34
https://www.accessdata.fda.gov/scripts/cdrh/cfdocs/cfMAUDE/Detail.CFM?MDRFOI__ID=12108819&pc=MTA	2023826-2021-02190	2021-05-13	Injury	STAAR SURGICAL COMPANY	2021-07-02	MTA	IMPLANTABLE COLLAMER LENS (ICL)	Off-Label Use; Inadequacy of Device Shape and/or Size	Appropriate Clinical Signs, Symptoms, Conditions Term / Code Not Available	NA	Event Description: THE REPORTER INDICATED THE SURGEON IMPLANTED A 13.2MM VICMO13.2 IMPLANTABLE COLLAMER LENS, -10.50 DIOPTER, IN THE PATIENTS RIGHT EYE (OD), ON (B)(6) 2021. THE LENS WAS EXPLANTED ON (B)(6) 2021 DUE TO EXCESSIVE VAULTING AND SIGNIFICANT REDUCTION OF IRIDO-CORNEAL ANGLES. THE LENS WAS EXCHANGED FOR A SHORTER LENS AND THE PROBLEM WAS RESOLVED. THE CAUSE OF THE EVENT WAS UNKNOWN. Ma…	OD	Physician	06/04/2021	2021	26
https://www.accessdata.fda.gov/scripts/cdrh/cfdocs/cfMAUDE/Detail.CFM?MDRFOI__ID=12112713&pc=MTA	2023826-2021-02191	2021-05-13	Injury	STAAR SURGICAL COMPANY	2021-07-02	MTA	IMPLANTABLE COLLAMER LENS (ICL)	Off-Label Use; Inadequacy of Device Shape and/or Size	Appropriate Clinical Signs, Symptoms, Conditions Term / Code Not Available	NA	Event Description: THE REPORTER INDICATED THE SURGEON IMPLANTED A 13.2MM VICMO13.2 IMPLANTABLE COLLAMER LENS, -09.50 DIOPTER, IN THE PATIENTS LEFT EYE (OS), ON (B)(6) 2021. THE LENS WAS EXPLANTED ON (B)(6) 2021 DUE TO EXCESSIVE VAULTING AND SIGNIFICANT REDUCTION OF IRIDO-CORNEAL ANGLES. THE LENS WAS EXCHANGED FOR A SHORTER LENS AND THE PROBLEM WAS RESOLVED. THE CAUSE OF THE EVENT WAS UNKNOWN. Man…	OS	Physician	06/04/2021	2021	26
https://www.accessdata.fda.gov/scripts/cdrh/cfdocs/cfMAUDE/Detail.CFM?MDRFOI__ID=12443623&pc=MTA	2023826-2021-03480	2021-07-26 04:00:00	Injury	STAAR SURGICAL COMPANY	2021-09-08 04:00:00	MTA	IMPLANTABLE COLLAMER LENS (ICL)	Off-Label Use; Inadequacy of Device Shape and/or Size	Appropriate Clinical Signs, Symptoms, Conditions Term / Code Not Available	NA	Event Description: THE REPORTER INDICATED THE SURGEON IMPLANTED A 12.1MM VICM5_12.1 IMPLANTABLE COLLAMER LENS, -14.00 DIOPTER, IN THE PATIENTS RIGHT EYE (OD), ON (B)(6) 2021. THE LENS WAS EXPLANTED ON (B)(6) 2021 DUE TO LOW VAULTING AND UNREACTIVE (FIXED) PUPIL. THE LENS WAS REPLACED WITH A LONGER LENS AND THE PROBLEM WAS RESOLVED. THE EYE IS QUIET AND PATIENT IS HAPPY. Manufacturer Narrative: CO…	OS	Physician	08/10/2021	2021	20	Female
https://www.accessdata.fda.gov/scripts/cdrh/cfdocs/cfMAUDE/Detail.CFM?MDRFOI__ID=14985509&pc=MTA	2023826-2022-02124	2022-03-12 05:00:00	Injury	STAAR SURGICAL COMPANY	2022-07-12 04:00:00	MTA	IMPLANTABLE COLLAMER LENS (ICL)	Off-Label Use; Inadequacy of Device Shape and/or Size	Appropriate Clinical Signs, Symptoms, Conditions Term / Code Not Available	P030016	Event Description: THE REPORTER INDICATED THAT THE SURGEON IMPLANTED A 12.6MM VICMO12.6, -13.00 DIOPTER, IMPLANTABLE COLLAMER LENS INTO THE PATIENT'S RIGHT EYE (OD) ON (B)(6) 2022. THE LENS WAS REPLACED WITH A LONGER LENGTH LENS DUE TO LOW VAULT ON (B)(6) 2022. THIS RESOLVED THE PROBLEM. CAUSE OF THE EVENT IS REPORTED AS UNKNOWN. Manufacturer Narrative: B)(4). CLAIM # B)(4).	OD	Physician	06/20/2022	2022	22	Male
https://www.accessdata.fda.gov/scripts/cdrh/cfdocs/cfMAUDE/Detail.CFM?MDRFOI__ID=14750533&pc=MTA	2023826-2022-01923	2022-05-20 04:00:00	Malfunction	STAAR SURGICAL COMPANY	2022-06-20 04:00:00	MTA	IMPLANTABLE COLLAMER LENS (ICL)	Off-Label Use; Inadequacy of Device Shape and/or Size	Appropriate Clinical Signs, Symptoms, Conditions Term / Code Not Available	P030016	Event Description: THE REPORTER INDICATED THAT A 13.2MM VICMO 13.2 IMPLANTABLE COLLAMER LENS OF -15.5 DIOPTER WAS IMPLANTED INTO THE PATIENTS RIGHT EYE (OD) ON (B)(6) 2022. EXCESSIVE VAULT AND SIGNIFICANT REDUCTION OF IRIDO CORNEAL ANGLES WAS OBSERVED. LENS REMAINS IMPLANTED. IF ADDITIONAL INFORMATION IS RECEIVED A SUPPLEMENTAL MEDWATCH REPORT WILL BE SUBMITTED. Manufacturer Narrative: ADDITIONAL…	OD	Physician	05/20/2022	2022	46	Female
https://www.accessdata.fda.gov/scripts/cdrh/cfdocs/cfMAUDE/Detail.CFM?MDRFOI__ID=15629417&pc=MTA	2023826-2022-03505	2022-08-06 04:00:00	Injury	STAAR SURGICAL COMPANY	2022-10-18 04:00:00	MTA	IMPLANTABLE COLLAMER LENS (ICL)	Off-Label Use; Inadequacy of Device Shape and/or Size	Appropriate Clinical Signs, Symptoms, Conditions Term / Code Not Available	P030016	Event Description: THE REPORTER INDICATED THE SURGEON IMPLANTED A 12.6MM VICMO12.6 IMPLANTABLE COLLAMER LENS, -08.00 DIOPTER, IN THE PATIENTS RIGHT EYE (OD), ON (B)(6) 2022. THE LENS WAS EXPLANTED ON (B)(6) 2022 DUE TO EXCESSIVE VAULTING AND SIGNIFICANT REDUCTION OF IRIDO-CORNEAL ANGLES. THE PROBLEM WAS RESOLVED. THE CAUSE OF THE EVENT WAS UNKNOWN. Manufacturer Narrative: (B)(4). CLAIM # (B)(4).	OD	Physician	09/22/2022	2022	24	Male
https://www.accessdata.fda.gov/scripts/cdrh/cfdocs/cfMAUDE/Detail.CFM?MDRFOI__ID=15652542&pc=MTA	2023826-2022-03506	2022-08-06 04:00:00	Injury	STAAR SURGICAL COMPANY	2022-10-21 04:00:00	MTA	IMPLANTABLE COLLAMER LENS (ICL)	Off-Label Use; Inadequacy of Device Shape and/or Size	Appropriate Clinical Signs, Symptoms, Conditions Term / Code Not Available	P030016	Event Description: THE REPORTER INDICATED THE SURGEON IMPLANTED A 12.6MM VICMO12.6 IMPLANTABLE COLLAMER LENS, -09.50 DIOPTER, IN THE PATIENTS LEFT EYE (OS), ON (B)(6) 2022. THE LENS WAS EXPLANTED ON (B)(6) 2022 DUE TO EXCESSIVE VAULTING AND SIGNIFICANT REDUCTION OF IRIDO-CORNEAL ANGLES. THE PROBLEM WAS RESOLVED. THE CAUSE OF THE EVENT WAS UNKNOWN. Manufacturer Narrative: H3: DEVICE EVALUATION: TH…	OS	Physician	09/22/2022	2022	24	Male
https://www.accessdata.fda.gov/scripts/cdrh/cfdocs/cfMAUDE/Detail.CFM?MDRFOI__ID=16035464&pc=MTA	2023826-2022-04560	2022-10-28 04:00:00	Injury	STAAR SURGICAL COMPANY	2022-12-22 05:00:00	MTA	IMPLANTABLE COLLAMER LENS (ICL)	Off-Label Use; Inadequacy of Device Shape and/or Size	Appropriate Clinical Signs, Symptoms, Conditions Term / Code Not Available	P030016	Event Description: THE REPORTER INDICATED THAT THE SURGEON IMPLANTED A 12.6MM VICMO12.6, -06.00 DIOPTER, IMPLANTABLE COLLAMER LENS INTO THE PATIENT'S RIGHT EYE (OD) ON (B)(6) 2022. THE LENS WAS REPLACED WITH A LONGER LENGTH LENS DUE TO LOW VAULT ON (B)(6) 2022. THIS RESOLVED THE PROBLEM. CAUSE OF THE EVENT IS REPORTED AS UNKNOWN. Manufacturer Narrative: WEIGHT - UNK; ETHNICITY - UNK; RACE - UNK. …	OD	Physician	11/29/2022	2022	35	Female
https://www.accessdata.fda.gov/scripts/cdrh/cfdocs/cfMAUDE/Detail.CFM?MDRFOI__ID=16673955&pc=MTA	2023826-2023-01060	2022-11-12 05:00:00	Injury	STAAR SURGICAL COMPANY	2023-04-04 04:00:00	MTA	IMPLANTABLE COLLAMER LENS (ICL)	Off-Label Use; Inadequacy of Device Shape and/or Size	Appropriate Clinical Signs, Symptoms, Conditions Term / Code Not Available	P030016	Event Description: THE REPORTER INDICATED THAT THE SURGEON IMPLANTED A 12.6MM VICMO12.6, -6.5 DIOPTER, IMPLANTABLE COLLAMER LENS INTO THE PATIENT'S RIGHT EYE (OD) ON (B)(6) 2022. THE LENS WAS REPLACED WITH A LONGER LENGTH LENS DUE TO LOW VAULT ON (B)(6) 2022. THIS RESOLVED THE PROBLEM. CAUSE OF THE EVENT IS REPORTED AS UNKNOWN. Manufacturer Narrative: A4 - UNK. A5 - UNK. A6 - UNK. DEVICE PROBLEM …	OD	Physician	03/17/2023	2023	30	Female
https://www.accessdata.fda.gov/scripts/cdrh/cfdocs/cfMAUDE/Detail.CFM?MDRFOI__ID=18170878&pc=MTA	2023826-2023-05170	2023-01-12 05:00:00	Injury	STAAR SURGICAL COMPANY	2023-11-20 05:00:00	MTA	IMPLANTABLE COLLAMER LENS (ICL)	Off-Label Use; Inadequacy of Device Shape and/or Size	Appropriate Clinical Signs, Symptoms, Conditions Term / Code Not Available	P030016	Event Description: THE REPORTER INDICATED THAT THE SURGEON IMPLANTED A 12.6MM VICMO12.6 IMPLANTABLE COLLAMER LENS OF DIOPTER -5.5 INTO THE PATIENT'S LEFT EYE (OS) ON (B)(6) 2019. EXCESSIVE VAULT AND SIGNIFICANT REDUCTION OF IRIDO-CORNEAL ANGLES WERE REPORTED. THE LENS WAS EXPLANTED ON (B)(4) 2023 A SHORTER LENGTH LENS WAS IMPLANTED. THIS RESOLVED THE PROBLEM. CAUSE OF EVENT REPORTED AS UNKNOWN. M…	OS	Physician	10/22/2023	2023	32	Female
https://www.accessdata.fda.gov/scripts/cdrh/cfdocs/cfMAUDE/Detail.CFM?MDRFOI__ID=16550264&pc=MTA	2023826-2023-00958	2023-01-13 05:00:00	Injury	STAAR SURGICAL COMPANY	2023-03-15 04:00:00	MTA	IMPLANTABLE COLLAMER LENS (ICL)	Off-Label Use; Inadequacy of Device Shape and/or Size	Appropriate Clinical Signs, Symptoms, Conditions Term / Code Not Available	P030016	Event Description: THE REPORTER INDICATED THAT THE SURGEON IMPLANTED A 12.6MM VICMO12.6; -10.0 DIOPTER IMPLANTABLE COLLAMER LENS INTO THE PATIENT'S LEFT EYE (OS) ON (B)(6) 2022 . THE PATIENT EXPERIENCED SIGNIFICANT REDUCTION OF IRIDO-CORNEAL ANGLES. ON (B)(6) 2023 THE LENS WAS EXPLANTED AND THIS RESOLVED THE PROBLEM. Manufacturer Narrative: (B)(4).	OS	Physician	03/14/2023	2023	28	Female
https://www.accessdata.fda.gov/scripts/cdrh/cfdocs/cfMAUDE/Detail.CFM?MDRFOI__ID=16587801&pc=MTA	2023826-2023-01007	2023-02-23 05:00:00	Malfunction	STAAR SURGICAL COMPANY	2023-03-21 04:00:00	MTA	IMPLANTABLE COLLAMER LENS (ICL)	Off-Label Use; Inadequacy of Device Shape and/or Size	Appropriate Clinical Signs, Symptoms, Conditions Term / Code Not Available	P030016	Event Description: THE REPORTER INDICATED THAT THE SURGEON IMPLANTED A 13.7MM VICM5_13.7; -3.5 DIOPTER IMPLANTABLE COLLAMER LENS INTO THE PATIENT'S RIGHT EYE (OD) ON (B)(6) 2023. THE SURGEON REPORTS THE PATIENT HAS EXCESSIVE VAULTING AND SIGNIFICANT REDUCTION OF IRIDO-CORNEAL ANGLES AND SHALLOW AC. THE SURGEON NOTES THEY LIKELY WILL REPLACE THE ICL WITH A SMALLER LENS; EITHER 13.2 OR 12.7. LENS R…	OD	Physician	02/24/2023	2023	50	Male
https://www.accessdata.fda.gov/scripts/cdrh/cfdocs/cfMAUDE/Detail.CFM?MDRFOI__ID=16967963&pc=MTA	2023826-2023-01915	2023-03-10 05:00:00	Injury	STAAR SURGICAL COMPANY	2023-05-19 04:00:00	MTA	IMPLANTABLE COLLAMER LENS (ICL)	Off-Label Use; Inadequacy of Device Shape and/or Size	Appropriate Clinical Signs, Symptoms, Conditions Term / Code Not Available	P030016	Event Description: THE REPORTER INDICATED THAT THE SURGEON IMPLANTED A 12.6MM VICMO12.6 IMPLANTABLE COLLAMER LENS OF DIOPTER -8.5 INTO THE PATIENT'S LEFT EYE (OS) ON (B)(6) 2023. EXCESSIVE VAULT AND SIGNIFICANT REDUCTION OF IRIDO-CORNEAL ANGLES WERE REPORTED. THE LENS WAS EXPLANTED ON (B)(6) 2023 AND IN ANOTHER SURGERY THAT DAY A SHORTER LENGTH LENS WAS IMPLANTED. THIS RESOLVED THE PROBLEM. CAUSE…	OS	Physician	04/21/2023	2023	36	Female
https://www.accessdata.fda.gov/scripts/cdrh/cfdocs/cfMAUDE/Detail.CFM?MDRFOI__ID=18086570&pc=MTA	2023826-2023-04884	2023-08-26 04:00:00	Injury	STAAR SURGICAL COMPANY	2023-11-07 05:00:00	MTA	IMPLANTABLE COLLAMER LENS (ICL)	Off-Label Use; Inadequacy of Device Shape and/or Size	Appropriate Clinical Signs, Symptoms, Conditions Term / Code Not Available	P030016	Event Description: THE REPORTER INDICATED THAT THE SURGEON IMPLANTED A 12.6MM VICMO12.6 IMPLANTABLE COLLAMER LENS OF DIOPTER -6.5 INTO THE PATIENT'S LEFT EYE (OS) ON (B)(6) 2023. THE LENS WAS EXCHANGED ON (B)(6) 2023 FOR A SHORTER LENGTH LENS DUE TO EXCESSIVE VAULT AND SIGNIFICANT REDUCTION OF IRIDO-CORNEAL ANGLES. THIS RESOLVED THE PROBLEM. CAUSE OF EVENT REPORTED AS UNKNOWN. Manufacturer Narrat…	OS	Physician	10/12/2023	2023	37	Female
https://www.accessdata.fda.gov/scripts/cdrh/cfdocs/cfMAUDE/Detail.CFM?MDRFOI__ID=18387744&pc=MTA	2023826-2023-05773	2023-09-07 04:00:00	Injury	STAAR SURGICAL COMPANY	2023-12-22 05:00:00	MTA	IMPLANTABLE COLLAMER LENS (ICL)	Off-Label Use; Inadequacy of Device Shape and/or Size	Appropriate Clinical Signs, Symptoms, Conditions Term / Code Not Available	P030016	Event Description: THE REPORTER INDICATED THAT THE SURGEON IMPLANTED A 13.2MM VICMO13.2 IMPLANTABLE COLLAMER LENS OF DIOPTER -11.5 INTO THE PATIENT'S RIGHT EYE (OD) ON (B)(6) 2023. THE LENS WAS EXCHANGED ON 12-OCT-2023 FOR A SHORTER LENGTH LENS DUE TO EXCESSIVE VAULT AND SIGNIFICANT REDUCTION OF IRIDO-CORNEAL ANGLES. THIS RESOLVED THE PROBLEM. CAUSE OF EVENT REPORTED AS UNKNOWN. Manufacturer Narr…	OD	Physician	11/27/2023	2023	20	Male
https://www.accessdata.fda.gov/scripts/cdrh/cfdocs/cfMAUDE/Detail.CFM?MDRFOI__ID=18180097&pc=MTA	2023826-2023-05210	2023-09-18 04:00:00	Malfunction	STAAR SURGICAL COMPANY	2023-11-21 05:00:00	MTA	IMPLANTABLE COLLAMER LENS (ICL)	Off-Label Use; Inadequacy of Device Shape and/or Size	Appropriate Clinical Signs, Symptoms, Conditions Term / Code Not Available	P030016	Event Description: THE REPORTER INDICATED THAT THE SURGEON IMPLANTED A 13.2MM VICMO13.2 IMPLANTABLE COLLAMER LENS OF DIOPTER -6.5 INTO THE PATIENT'S RIGHT EYE (OD) ON (B)(6) 2023. WITHIN THE INITIAL SURGERY THE LENS WAS REMOVED AND REPLACED INTRA-OPERATIVELY FOR A SHORTER LENGTH LENS DUE TO EXCESSIVE VAULT. SIGNIFICANT REDUCTION OF IRIDO-CORNEAL ANGLES WAS ALSO NOTED. THE PROBLEM WAS RESOLVED. CA…	OD	Physician	10/25/2023	2023	28	Female
https://www.accessdata.fda.gov/scripts/cdrh/cfdocs/cfMAUDE/Detail.CFM?MDRFOI__ID=18248706&pc=MTA	2023826-2023-05409	2023-11-09 05:00:00	Injury	STAAR SURGICAL COMPANY	2023-12-01 05:00:00	MTA	IMPLANTABLE COLLAMER LENS (ICL)	Off-Label Use; Inadequacy of Device Shape and/or Size	Appropriate Clinical Signs, Symptoms, Conditions Term / Code Not Available	P030016	Event Description: THE REPORTER INDICATED THAT THE SURGEON IMPLANTED A 13.2MM VICMO13.2; -13 DIOPTER IMPLANTABLE COLLAMER LENS INTO THE PATIENT'S LEFT EYE (OS) ON (B)(6) 2023. THE PATIENT EXPERIENCED EXCESSIVE VAULTING AND SIGNIFICANT REDUCTION OF IRIDO-CORNEAL ANGLE. ON (B)(6) 2023 THE LENS WAS EXCHANGED WITH A SHORTER LENGTH LENS AND THIS RESOLVED THE PROBLEM. THE CAUSE OF THE EVENT WAS REPORTE…	OS	Physician	11/27/2023	2023	24	Male
https://www.accessdata.fda.gov/scripts/cdrh/cfdocs/cfMAUDE/Detail.CFM?MDRFOI__ID=17862020&pc=MTA	2023826-2023-04065	2023-08-17 04:00:00	Injury	STAAR SURGICAL COMPANY	2023-10-03 04:00:00	MTA	IMPLANTABLE COLLAMER LENS (ICL)	Off-Label Use; Inadequacy of Device Shape and/or Size; Device Dislodged or Dislocated; Adverse Event Without Identified Device or Use Problem	Appropriate Clinical Signs, Symptoms, Conditions Term / Code Not Available	P030016	Event Description: THE REPORTER INDICATED THAT A 13.7MM, VICM5 13.7, -11.50 DIOPTER, IMPLANTABLE COLLAMER LENS WAS IMPLANTED INTO THE PATIENT'S LEFT EYE (OS) ON (B)(6) 2023. EXCESSIVE VAULT, SIGNIFICANT REDUCTION OF IRIDO-CORNEAL ANGLES, LENS DISLOCATION, AND PIGMENT DISPERSION WAS OBSERVED. LENS REMAINS IMPLANTED. ADDITIONAL INFORMATION HAS BEEN REQUESTED BUT NONE HAS BEEN FORTHCOMING.Event Desc…	OS	Physician	09/12/2023	2023	29	Female
https://www.accessdata.fda.gov/scripts/cdrh/cfdocs/cfMAUDE/Detail.CFM?MDRFOI__ID=11065550&pc=MTA	2023826-2020-03086	2020-11-24	Malfunction	STAAR SURGICAL COMPANY	2020-12-23	MTA	IMPLANTABLE COLLAMER LENS (ICL)	Patient-Device Incompatibility	Appropriate Clinical Signs, Symptoms, Conditions Term / Code Not Available	N/A	Event Description: THE REPORTER INDICATED THAT THE SURGEON IMPLANTED A 12.1MM VICM5_12.1, -07.00 DIOPTER, IMPLANTABLE COLLAMER LENS, INTO THE PATIENT'S LEFT EYE (OS) ON (B)(6) 2020. SIGNIFICANT REDUCTION OF ENDOTHELIAL CELL COUNT OR SIGNIFICANT ENDOTHELIAL CELL LOSS WAS OBSERVED. SPECULAR MICROSCOPY DIAGNOSTICES PERFORMED. NO TREATMENT PERFORMED. LENS REMAINS IMPLANTED. CAUSE OF THE EVENT IS REPO…	OS	Physician Assistant	11/30/2020	2020	37
https://www.accessdata.fda.gov/scripts/cdrh/cfdocs/cfMAUDE/Detail.CFM?MDRFOI__ID=17493392&pc=MTA	2023826-2023-03434	2023-06-26 04:00:00	Injury	STAAR SURGICAL COMPANY	2023-08-09 04:00:00	MTA	IMPLANTABLE COLLAMER LENS (ICL)	Patient-Device Incompatibility	Appropriate Clinical Signs, Symptoms, Conditions Term / Code Not Available	P030016	Event Description: THE REPORTER INDICATED THAT A 13.2MM VICMO 13.2 IMPLANTABLE COLLAMER LENS OF -12.0 DIOPTER WAS IMPLANTED INTO THE PATIENT'S RIGHT EYE (OD) ON (B)(6) 2023. ON (B)(6) 2023 THE LENS WAS REMOVED DUE TO PATIENT SUFFERING FROM PSYCHOLOGICAL ANXIETY, COULD NOT SLEEP, AND SUFFERED FROM SEVERE NEURASTHENIA. REPORTEDLY AFTER THE ICL LENS IMPLANTATION, THE PATIENT HAD A FOREIGN OBJECT IN …	OD	Physician	08/07/2023	2023	40	Female
https://www.accessdata.fda.gov/scripts/cdrh/cfdocs/cfMAUDE/Detail.CFM?MDRFOI__ID=13023012&pc=MTA	2023826-2021-04905	2021-10-22 04:00:00	Injury	STAAR SURGICAL COMPANY	2021-12-16 05:00:00	MTA	IMPLANTABLE COLLAMER LENS (ICL)	Unintended Movement	Appropriate Clinical Signs, Symptoms, Conditions Term / Code Not Available		Event Description: THE REPORTER INDICATED THAT THE SURGEON IMPLANTED A 13.2MM VICMO13.2; -11.0 DIOPTER IMPLANTABLE COLLAMER LENS INTO THE PATIENT'S LEFT EYE (OS) ON (B)(6) 2021. THE LENS WAS IMPLANTED UPSIDE DOWN. INTRAOPERATIVELY THE LENS WAS REMOVED AND THERE WAS PATIENT INJURY. DURING THE LENS REMOVAL THE LENS HAD RUPTURED AND DAMAGED THE CORNEAL ENDOTHELIUM AND IT WAS ALSO REPORTED THE PATIEN…	OS	Physician	12/14/2021	2021	27	Female
https://www.accessdata.fda.gov/scripts/cdrh/cfdocs/cfMAUDE/Detail.CFM?MDRFOI__ID=15316755&pc=MTA	2023826-2022-02956	2022-07-21 04:00:00	Injury	STAAR SURGICAL COMPANY	2022-08-29 04:00:00	MTA	IMPLANTABLE COLLAMER LENS (ICL)	Adverse Event Without Identified Device or Use Problem	Appropriate Clinical Signs, Symptoms, Conditions Term / Code Not Available; No Clinical Signs, Symptoms or Conditions	P030016	Event Description: THE REPORTER INDICATED THAT A 13.2MM VICM5_13.2; -07.00 DIOPTER IMPLANTABLE COLLAMER LENS WAS IMPLANTED INTO A PATIENT'S EYE. IT WAS REPORTED THAT THE LENS WAS EXPLANTED. ATTEMPTS TO OBTAIN ADDITIONAL INFORMATION HAVE NOT BEEN SUCCESSFUL. IF ADDITIONAL INFORMATION IS RECEIVED A SUPPLEMENTAL MEDWATCH REPORT WILL BE SUBMITTED. Manufacturer Narrative: TYPE OF INVESTIGATION: LENS W…	OD	Physician	08/01/2022	2022	31	Female
https://www.accessdata.fda.gov/scripts/cdrh/cfdocs/cfMAUDE/Detail.CFM?MDRFOI__ID=12862895&pc=MTA	2023826-2021-04280	2020-10-26 04:00:00	Injury	STAAR SURGICAL COMPANY	2021-11-23 05:00:00	MTA	IMPLANTABLE COLLAMER LENS (ICL)	Inadequacy of Device Shape and/or Size	Appropriate Clinical Signs, Symptoms, Conditions Term / Code Not Available; No Clinical Signs, Symptoms or Conditions		Event Description: THE REPORTER INDICATED THAT THE SURGEON IMPLANTED A 13.2MM VICM_13.2; -12.00 DIOPTER IMPLANTABLE COLLAMER LENS INTO THE PATIENT'S LEFT EYE (OS) ON (B)(6) 2020. ON (B)(6) 2020 THE LENS WAS EXCHANGED WITH A SHORTER LENGTH LENS DUE TO EXCESSIVE VAULTING AND SIGNIFICANT REDUCTION OF IRIDO-CORNEAL ANGLES. THIS RESOLVED THE PROBLEM. THE CAUSE OF THE EVENT WAS REPORTED AS THE DEVICE. …	OS	Physician	11/02/2021	2021	28	Female
https://www.accessdata.fda.gov/scripts/cdrh/cfdocs/cfMAUDE/Detail.CFM?MDRFOI__ID=12411351&pc=MTA	2023826-2021-03461	2021-08-05 04:00:00	Malfunction	STAAR SURGICAL COMPANY	2021-09-01 04:00:00	MTA	IMPLANTABLE COLLAMER LENS (ICL)	Inadequacy of Device Shape and/or Size	Appropriate Clinical Signs, Symptoms, Conditions Term / Code Not Available; No Clinical Signs, Symptoms or Conditions		Event Description: THE REPORTER INDICATED THAT THE SURGEON IMPLANTED A 12.6MM VICMO12.6; -5.5 DIOPTER IMPLANTABLE COLLAMER LENS INTO THE PATIENT'S LEFT EYE (OS) ON (B)(6) 2021. INTRAOPERATIVELY THE LENS WAS REMOVED AND REPLACED WITH A LONGER LENGTH LENS DUE TO LOW VAULTING. THIS RESOLVED THE PROBLEM. THE CAUSE OF THE EVENT WAS REPORTED AS UNKNOWN. Manufacturer Narrative: CORRECTED DATA: B5 - IT W…	OS		08/13/2021	2021	24
https://www.accessdata.fda.gov/scripts/cdrh/cfdocs/cfMAUDE/Detail.CFM?MDRFOI__ID=15118195&pc=MTA	2023826-2022-02411	2021-09-27 04:00:00	Injury	STAAR SURGICAL COMPANY	2022-07-27 04:00:00	MTA	IMPLANTABLE COLLAMER LENS (ICL)	Inadequacy of Device Shape and/or Size	Appropriate Clinical Signs, Symptoms, Conditions Term / Code Not Available; No Clinical Signs, Symptoms or Conditions	P030016	Event Description: THE REPORTER INDICATED THAT A 13.2MM VICMO13.2 IMPLANTABLE COLLAMER LENS OF -6.5 DIOPTER WAS IMPLANTED INTO THE PATIENT'S LEFT EYE (OS) ON (B)(6) 2021. ON (B)(6) 2022, THE LENS WAS EXCHANGED FOR A SHORTER LENGTH LENS DUE TO EXCESSIVE VAULT AND SIGNIFICANT REDUCTION OF IRIDO-CORNEAL ANGLES. THE PROBLEM WAS RESOLVED. CAUSE REPORTED AS UNKNOWN. Manufacturer Narrative: H6: CLINICAL…	OS	Physician	09/20/2022	2022	28	Female
https://www.accessdata.fda.gov/scripts/cdrh/cfdocs/cfMAUDE/Detail.CFM?MDRFOI__ID=12741579&pc=MTA	2023826-2021-04220	2021-10-02	Injury	STAAR SURGICAL COMPANY	2021-11-02	MTA	IMPLANTABLE COLLAMER LENS (ICL)	Inadequacy of Device Shape and/or Size	Appropriate Clinical Signs, Symptoms, Conditions Term / Code Not Available; No Clinical Signs, Symptoms or Conditions		Event Description: THE REPORTER INDICATED THAT THE SURGEON IMPLANTED A 12.6MM VICMO12.6; -5.0 DIOPTER IMPLANTABLE COLLAMER LENS INTO THE PATIENT'S RIGHT EYE (OD) ON (B)(6) 2021. ON (B)(6) 2021 THE LENS WAS EXCHANGED WITH A SHORTER LENGTH LENS DUE TO EXCESSIVE VAULTING AND SIGNIFICANT REDUCTION OF IRIDO-CORNEAL ANGLES. THIS RESOLVED THE PROBLEM. THE CAUSE OF THE EVENT WAS REPORTED AS UNKNOWN. Manu…	OD	Physician	10/28/2021	2021	25
https://www.accessdata.fda.gov/scripts/cdrh/cfdocs/cfMAUDE/Detail.CFM?MDRFOI__ID=13122991&pc=MTA	2023826-2021-04777	2021-10-02 04:00:00	Injury	STAAR SURGICAL COMPANY	2021-12-30 05:00:00	MTA	IMPLANTABLE COLLAMER LENS (ICL)	Inadequacy of Device Shape and/or Size	Appropriate Clinical Signs, Symptoms, Conditions Term / Code Not Available; No Clinical Signs, Symptoms or Conditions	NA	Event Description: THE REPORTER INDICATED THAT A 12.6MM VICMO 12.6 IMPLANTABLE COLLAMER LENS OF -5.5 DIOPTER INTO THE PATIENTS LEFT EYE (OS) ON (B)(6) 2021. ON (B)(6) 2021 THE LENS WAS EXCHANGED FOR A SHORTER LENGTH LENS DUE TO EXCESSIVE VAULT. THE EXCHANGE RESOLVED THE PROBLEM. CAUSE IS REPORTED AS UNKNOWN. Manufacturer Narrative: THIS PRODUCT IS NOT MARKETED IN THE US. (B)(4). Manufacturer Narr…	OS	Physician	12/03/2021	2021	25	Female
https://www.accessdata.fda.gov/scripts/cdrh/cfdocs/cfMAUDE/Detail.CFM?MDRFOI__ID=13256293&pc=MTA	2023826-2022-00137	2021-11-23 05:00:00	Injury	STAAR SURGICAL COMPANY	2022-01-13 05:00:00	MTA	IMPLANTABLE COLLAMER LENS	Inadequacy of Device Shape and/or Size	Appropriate Clinical Signs, Symptoms, Conditions Term / Code Not Available; No Clinical Signs, Symptoms or Conditions	P030016	Event Description: THE REPORTER STATES AN IMPLANTABLE COLLAMER LENS WAS IMPLANTED INTO THE PATIENT'S LEFT (OS) EYE. THE SURGEON REPORTS EXCESSIVE VAULT. ATTEMPTS TO OBTAIN ADDITIONAL INFORMATION HAVE NOT BEEN SUCCESSFUL. Manufacturer Narrative: B5-ADDITIONAL INFORMATION: A 13.7MM MICL13.7, -13.0 DIOPTER LENS WAS IMPLANTED INTO THE PATIENT'S EYE ON (B)(6) 2021. ON (B)(6) 2021 THE LENS WAS EXCHANGE…	OS	Physician	12/22/2021	2021	37	Male
https://www.accessdata.fda.gov/scripts/cdrh/cfdocs/cfMAUDE/Detail.CFM?MDRFOI__ID=15952754&pc=MTA	2023826-2022-04351	2022-11-04 04:00:00	Injury	STAAR SURGICAL COMPANY	2022-12-09 05:00:00	MTA	IMPLANTABLE COLLAMER LENS (ICL)	Inadequacy of Device Shape and/or Size	Appropriate Clinical Signs, Symptoms, Conditions Term / Code Not Available; No Clinical Signs, Symptoms or Conditions	P030016	Event Description: THE REPORTER INDICATED THE SURGEON IMPLANTED AND REMOVED A 13.2MM VICM5_13.2 IMPLANTABLE COLLAMER LENS, -11.50 DIOPTER, FROM THE PATIENTS RIGHT EYE (OD) DUE TO THE BIG SIZE OF THE LENS. THE LENS WAS REPLACED WITH A SMALLER SIZE LENS. ADDITIONAL INFORMATION HAS BEEN REQUESTED BUT NONE HAS BEEN FORTHCOMING. Manufacturer Narrative: ADDITIONAL DATA: H6: HEALTH IMPACT- CLINICAL CODE…	OD	Other Health Care Professional	11/17/2022	2022	29	Female
https://www.accessdata.fda.gov/scripts/cdrh/cfdocs/cfMAUDE/Detail.CFM?MDRFOI__ID=17195743&pc=MTA	2023826-2023-02534	2023-03-08 05:00:00	Injury	STAAR SURGICAL COMPANY	2023-06-23 04:00:00	MTA	IMPLANTABLE COLLAMER LENS (ICL)	Inadequacy of Device Shape and/or Size	Appropriate Clinical Signs, Symptoms, Conditions Term / Code Not Available; No Clinical Signs, Symptoms or Conditions	P030016	Event Description: THE REPORTER INDICATED THAT THE SURGEON IMPLANTED A 12.6MM VICM5_12.6 IMPLANTABLE COLLAMER LENS OF DIOPTER -9.5 INTO THE PATIENT'S RIGHT EYE (OD) ON (B)(6) 2023. EXCESSIVE VAULT AND SIGNIFICANT REDUCTION OF IRIDO-CORNEAL ANGLES WERE NOTED. THE LENS WAS REMOVED ON (B)(6) 2023 AND A SHORTER LENGTH LENS WAS IMPLANTED ON (B)(6) 2023. THE PROBLEM WAS RESOLVED. CAUSE OF THE EVENT WAS…	OD	Physician	05/29/2023	2023	35	Male
https://www.accessdata.fda.gov/scripts/cdrh/cfdocs/cfMAUDE/Detail.CFM?MDRFOI__ID=18036041&pc=MTA	2023826-2023-04894	2023-04-23 04:00:00	Injury	STAAR SURGICAL COMPANY	2023-10-30 04:00:00	MTA	IMPLANTABLE COLLAMER LENS (ICL)	Inadequacy of Device Shape and/or Size	Appropriate Clinical Signs, Symptoms, Conditions Term / Code Not Available; No Clinical Signs, Symptoms or Conditions	P030016	Event Description: THE REPORTER INDICATED THAT THE SURGEON IMPLANTED A 12.6MM VICMO 12.6 IMPLANTABLE COLLAMER LENS OF DIOPTER -5.0 INTO THE PATIENT'S RIGHT EYE (OD) ON (B)(6) 2022. ON (B)(6) 2023 THE LENS WAS EXCHANGED FOR A SHORTER LENGTH LENS DUE TO EXCESSIVE VAULT AND SIGNIFICANT REDUCTION OF IRIDO-CORNEAL ANGLES. THE PROBLEM WAS RESOLVED. THE CAUSE OF THE EVENT WAS REPORTED AS UNKNOWN. Manufa…	OD	Physician	10/26/2023	2023	38	Female
https://www.accessdata.fda.gov/scripts/cdrh/cfdocs/cfMAUDE/Detail.CFM?MDRFOI__ID=17056429&pc=MTA	2023826-2023-02130	2023-05-10 04:00:00	Malfunction	STAAR SURGICAL COMPANY	2023-06-02 04:00:00	MTA	IMPLANTABLE COLLAMER LENS (ICL)	Inadequacy of Device Shape and/or Size	Appropriate Clinical Signs, Symptoms, Conditions Term / Code Not Available; No Clinical Signs, Symptoms or Conditions	UNK	Event Description: THE REPORTER INDICATED THAT AN IMPLANTABLE COLLAMER LENS WAS IMPLANTED INTO THE PATIENT'S LEFT EYE (OS). LOW VAULT WAS OBSERVED. Manufacturer Narrative: B5: THE REPORTER INDICATED THAT THE SURGEON IMPLANTED A 13.2MM VICMO13.2 IMPLANTABLE COLLAMER LENS OF DIOPTER -10.0 INTO THE PATIENT'S LEFT EYE (OS) ON (B)(6) 2016. LOW VAULT WAS OBSERVED. PATIENT EXPERIENCED REFRACTIVE CHANGE …	OS	Physician	09/18/2023	2023	39	Female
https://www.accessdata.fda.gov/scripts/cdrh/cfdocs/cfMAUDE/Detail.CFM?MDRFOI__ID=17131350&pc=MTA	2023826-2023-02394	2023-07-26 04:00:00	Injury	STAAR SURGICAL COMPANY	2023-06-14 04:00:00	MTA	IMPLANTABLE COLLAMER LENS (ICL)	Inadequacy of Device Shape and/or Size	Appropriate Clinical Signs, Symptoms, Conditions Term / Code Not Available; No Clinical Signs, Symptoms or Conditions	P030016	Event Description: THE REPORTER INDICATED THAT THE SURGEON IMPLANTED A 13.2MM VICM5_13.2; -13.50 DIOPTER IMPLANTABLE COLLAMER LENS INTO THE PATIENT'S RIGHT EYE (OD) ON (B)(6) 2023. THE PATIENT EXPERIENCED EXCESSIVE VAULTING. THE SURGEON REPOSITIONED THE LENS ON (B)(6) 2023 AND THIS RESOLVED THE PROBLEM. IT WAS ADDITIONALLY NOTED "THE DOCTOR ROTATED THE LENS 90 DEGREES VAULT IS OK". THE CAUSE OF T…	OD	Physician	06/13/2023	2023	43	Female
https://www.accessdata.fda.gov/scripts/cdrh/cfdocs/cfMAUDE/Detail.CFM?MDRFOI__ID=18036034&pc=MTA	2023826-2023-04841	2023-10-14 04:00:00	Injury	STAAR SURGICAL COMPANY	2023-10-30 04:00:00	MTA	IMPLANTABLE COLLAMER LENS (ICL)	Inadequacy of Device Shape and/or Size	Appropriate Clinical Signs, Symptoms, Conditions Term / Code Not Available; No Clinical Signs, Symptoms or Conditions	P030016	Event Description: THE REPORTER INDICATED THAT THE SURGEON IMPLANTED A 13.2MM VICMO 13.2 IMPLANTABLE COLLAMER LENS OF DIOPTER -4.0 INTO THE PATIENT'S RIGHT EYE (OD) ON (B)(6) 2023. ON (B)(6) 2023 THE LENS WAS EXCHANGED FOR A SHORTER LENGTH LENS DUE TO EXCESSIVE VAULT AND SIGNIFICANT REDUCTION OF IRIDO-CORNEAL ANGLES. THE PROBLEM WAS RESOLVED. THE CAUSE OF THE EVENT WAS REPORTED AS UNKNOWN. Manufa…	OD	Physician	10/25/2023	2023	31	Female
https://www.accessdata.fda.gov/scripts/cdrh/cfdocs/cfMAUDE/Detail.CFM?MDRFOI__ID=18036037&pc=MTA	2023826-2023-04842	2023-10-14 04:00:00	Injury	STAAR SURGICAL COMPANY	2023-10-30 04:00:00	MTA	IMPLANTABLE COLLAMER LENS (ICL)	Inadequacy of Device Shape and/or Size	Appropriate Clinical Signs, Symptoms, Conditions Term / Code Not Available; No Clinical Signs, Symptoms or Conditions	P030016	Event Description: THE REPORTER INDICATED THAT THE SURGEON IMPLANTED A 13.2MM VICMO 13.2 IMPLANTABLE COLLAMER LENS OF DIOPTER -3.5 INTO THE PATIENT'S LEFT EYE (OS) ON (B)(6) 2023. ON (B)(6) 2023 THE LENS WAS EXCHANGED FOR A SHORTER LENGTH LENS DUE TO EXCESSIVE VAULT AND SIGNIFICANT REDUCTION OF IRIDO-CORNEAL ANGLES. THE PROBLEM WAS RESOLVED. THE CAUSE OF THE EVENT WAS REPORTED AS UNKNOWN. Manufac…	OS	Physician	10/25/2023	2023	31	Female
https://www.accessdata.fda.gov/scripts/cdrh/cfdocs/cfMAUDE/Detail.CFM?MDRFOI__ID=13670775&pc=MTA	2023826-2022-00614		Injury	STAAR SURGICAL COMPANY	2022-03-04 05:00:00	MTA	IMPLANTABLE COLLAMER LENS (ICL)	Inadequacy of Device Shape and/or Size	Appropriate Clinical Signs, Symptoms, Conditions Term / Code Not Available; No Clinical Signs, Symptoms or Conditions	NA	Event Description: THE REPORTER INDICATED THAT A 13.2MM VICM5_13.2 IMPLANTABLE COLLAMER LENS OF -12.0 DIOPTER WAS IMPLANTED INTO THE PATIENT'S RIGHT EYE (OD) ON (B)(6) 2021. ON (B)(6) 2022 THE LENS WAS EXCHANGED WITH A SHORTER LENGTH LENS DUE TO EXCESSIVE VAULT AND SIGNIFICANT REDUCTION OF IRIDO-CORNEAL ANGELS. THIS RESOLVED THE PROBLEM. CAUSE IS REPORTED AS UNKNOWN. Manufacturer Narrative: WEIGH…	OD	Physician	02/24/2022	2022		Female
https://www.accessdata.fda.gov/scripts/cdrh/cfdocs/cfMAUDE/Detail.CFM?MDRFOI__ID=18287974&pc=MTA	2023826-2023-05443	2023-12-01 05:00:00	Injury	STAAR SURGICAL COMPANY	2023-12-07 05:00:00	MTA	IMPLANTABLE COLLAMER LENS (ICL)	Inadequacy of Device Shape and/or Size; No Apparent Adverse Event	Appropriate Clinical Signs, Symptoms, Conditions Term / Code Not Available; No Clinical Signs, Symptoms or Conditions	P030016	Event Description: THE REPORTER INDICATED THE SURGEON IMPLANTED AN ICL IMPLANTABLE COLLAMER LENS INTO THE PATIENTS EYE. AT 2 DAYS POST-OP, THE LENS HAD A VAULT OF 2.0. THE ANGLE IS SLIGHTLY NARROW. THE LENS REMAINED IMPLANTED. ADDITIONAL INFORMATION HAS BEEN REQUESTED BUT NONE HAS BEEN FORTHCOMING. Manufacturer Narrative: ADDITIONAL DATA: H6: HEALTH IMPACT- CLINICAL CODE: 4581 - PIGMENT ON ANTERI…	OS	Physician	11/16/2023	2023	24	Female
https://www.accessdata.fda.gov/scripts/cdrh/cfdocs/cfMAUDE/Detail.CFM?MDRFOI__ID=12724511&pc=MTA	2023826-2021-04164	2021-10-24	Injury	STAAR SURGICAL COMPANY	2021-10-29	MTA	IMPLANTABLE COLLAMER LENS (ICL)	Inadequacy of Device Shape and/or Size; Patient-Device Incompatibility	Appropriate Clinical Signs, Symptoms, Conditions Term / Code Not Available; No Clinical Signs, Symptoms or Conditions		Event Description: THE REPORTER INDICATED THAT THE SURGEON IMPLANTED A 13.2MM VICMO13.2; -15.5 DIOPTER IMPLANTABLE COLLAMER LENS INTO THE PATIENT'S LEFT EYE (OS) ON (B)(6) 2021. ON (B)(6) 2021 THE LENS WAS EXCHANGED WITH A SHORTER LENGTH LENS DUE TO EXCESSIVE VAULTING AND SIGNIFICANT REDUCTION OF IRIDO-CORNEAL ANGLES. THIS RESOLVED THE PROBLEM. THE CAUSE OF THE EVENT WAS REPORTED AS A PATIENT REL…	OS	Physician	10/27/2021	2021	27
https://www.accessdata.fda.gov/scripts/cdrh/cfdocs/cfMAUDE/Detail.CFM?MDRFOI__ID=14962931&pc=MTA	2023826-2022-02177	2022-06-28 04:00:00	Malfunction	STAAR SURGICAL COMPANY	2022-07-08 04:00:00	MTA	IMPLANTABLE COLLAMER LENS (ICL)	No Apparent Adverse Event	Appropriate Clinical Signs, Symptoms, Conditions Term / Code Not Available; No Clinical Signs, Symptoms or Conditions	P030016	Event Description: THE REPORTER INDICATED THAT THE SURGEON IMPLANTED A 12.6MM VICM5_12.6; -10.50 DIOPTER IMPLANTABLE COLLAMER LENS INTO THE PATIENT'S LEFT EYE (OS) ON (B)(6) 2022. AFTER IMPLANTATION THE SURGEON NOTICED THERE WAS A FOREIGN SUBSTANCE THAT LOOKED LIKE TINY PLASTIC DEBRIS WAS FOUND ON THE LENS. THE SURGEON REMOVED THE DEBRIS WITH THE FORCEPS. LENS REMAINS IMPLANTED. Manufacturer Narr…	OS	Physician	07/05/2022	2022	24	Male
https://www.accessdata.fda.gov/scripts/cdrh/cfdocs/cfMAUDE/Detail.CFM?MDRFOI__ID=18121662&pc=MTA	2023826-2023-04971	2023-10-24 04:00:00	Malfunction	STAAR SURGICAL COMPANY	2023-11-13 05:00:00	MTA	IMPLANTABLE COLLAMER LENS (ICL)	No Apparent Adverse Event	Appropriate Clinical Signs, Symptoms, Conditions Term / Code Not Available; No Clinical Signs, Symptoms or Conditions	P030016	Event Description: THE REPORTER INDICATED THAT 13.2MM VICM513.2 IMPLANTABLE COLLAMER LENS OF A -10.0 DIOPTER WAS IMPLANTED INTO THE PATIENT'S LEFT EYE (OS) ON (B)(6) 2023. "VERY SHALLOW AC POST ICL" WAS REPORTED. THE PROBLEM WAS NOT RESOLVED. CAUSE OF THE EVENT WAS THE DEVICE. Manufacturer Narrative: A4-A6: UNK. H6: WORK ORDER SEARCH: NO SIMILAR COMPLAINTS WITHIN ASSOCIATED LOTS WERE FOUND. CLAIM…	OS	Physician	10/31/2023	2023	43	Female
https://www.accessdata.fda.gov/scripts/cdrh/cfdocs/cfMAUDE/Detail.CFM?MDRFOI__ID=11782065&pc=MTA	2023826-2021-01381	2020-10-09 04:00:00	Malfunction	STAAR SURGICAL COMPANY	2021-05-06 04:00:00	MTA	IMPLANTABLE COLLAMER LENS (ICL)	Off-Label Use; Inadequacy of Device Shape and/or Size	Appropriate Clinical Signs, Symptoms, Conditions Term / Code Not Available; No Clinical Signs, Symptoms or Conditions	NA	Event Description: THE REPORTER INDICATED THAT A 12.1MM, VICMO12.1, -11.50 DIOPTER, IMPLANTABLE COLLAMER LENS WAS IMPLANTED INTO THE PATIENTS RIGHT EYE (OD) ON (B)(6) 2020. THE LENS WAS LATER EXCHANGED FOR A LONGER LENGTH LENS DUE TO LOW VAULT (REPORTED AS 1000 UM OR 2 CT). THIS EXCHANGE RESOLVED THE PROBLEM. CAUSE OF EVENT WAS UNKNOWN. Manufacturer Narrative: B5:THE REPORTER INDICATED THAT A 12.…	OD	Physician	04/06/2021	2021	34	Female
https://www.accessdata.fda.gov/scripts/cdrh/cfdocs/cfMAUDE/Detail.CFM?MDRFOI__ID=13552903&pc=MTA	2023826-2022-00448	2021-11-30 05:00:00	Injury	STAAR SURGICAL COMPANY	2022-02-17 05:00:00	MTA	IMPLANTABLE COLLAMER LENS (ICL)	Off-Label Use; Inadequacy of Device Shape and/or Size	Appropriate Clinical Signs, Symptoms, Conditions Term / Code Not Available; No Clinical Signs, Symptoms or Conditions	NA	Event Description: THE REPORTER INDICATED THAT A 13.2MM VICMO13.2 IMPLANTABLE COLLAMER LENS OF -12.0 DIOPTER WAS IMPLANTED INTO THE PATIENT'S RIGHT EYE (OD) ON (B)(6) 2021. ON (B)(6) 2021 THE LENS WAS EXCHANGED WITH A SHORTER LENGTH LENS DUE TO EXCESSIVE VAULT AND SIGNIFICANT REDUCTION OF IRIDO-CORNEAL ANGELS. THIS RESOLVED THE PROBLEM. CAUSE IS REPORTED AS UNKNOWN. Manufacturer Narrative: WEIGHT…	OD	Physician	02/09/2022	2022	32	Female
https://www.accessdata.fda.gov/scripts/cdrh/cfdocs/cfMAUDE/Detail.CFM?MDRFOI__ID=18480555&pc=MTA	2023826-2024-00090	2023-12-19 05:00:00	Injury	STAAR SURGICAL COMPANY	2024-01-09 05:00:00	MTA	IMPLANTABLE COLLAMER LENS (ICL)	Off-Label Use; Inadequacy of Device Shape and/or Size	Appropriate Clinical Signs, Symptoms, Conditions Term / Code Not Available; No Clinical Signs, Symptoms or Conditions	P030016	Event Description: THE REPORTER INDICATED THAT THE SURGEON IMPLANTED A 12.6MM VICMO 12.6 IMPLANTABLE COLLAMER LENS OF DIOPTER -7.0 INTO THE PATIENT'S RIGHT EYE (OD) ON (B)(6) 2023. ON (B)(6) 2023 THE LENS WAS EXCHANGED FOR A SHORTER LENGTH LENS DUE TO EXCESSIVE VAULT, ELEVATED IOP: 40MMHG WITHOUT PUPIL BLOCK AND ANGLE CLOSURE, AND SIGNIFICANT REDUCTION OF IRIDO-CORNEAL ANGLES. THE PROBLEM WAS RES…	OD	Physician	12/28/2023	2023	28	Female
https://www.accessdata.fda.gov/scripts/cdrh/cfdocs/cfMAUDE/Detail.CFM?MDRFOI__ID=6153422&pc=MTA	2023826-2016-01745		Injury	STAAR SURGICAL COMPANY	2016-12-07	MTA	ICL (IMPLANTABLE COLLAMER LENS)	Adverse Event Without Identified Device or Use Problem	Blurred Vision	P030016	Event Description: THE PATIENT REPORTED THE SURGEON IMPLANTED A 13.2MM MICL13.2 IMPLANTABLE COLLAMER LENS, -9.5 DIOPTER, IN HER LEFT EYE (OS). THE PATIENT REPORTED HER VISION WAS SLIGHTLY BLURRY AT NIGHT AND IN DIM LIGHTING. THE LENS WAS IMPLANTED ON (B)(6) 2012 AND REMAINS IMPLANTED. THE FACILITY CONFIRMED THE INFORMATION AND INDICATED THE EVENT WAS DUE TO THE PATIENT HAD LARGE PUPILS AND WAS NO…	OS	Patient	11/07/2016	2016	22
https://www.accessdata.fda.gov/scripts/cdrh/cfdocs/cfMAUDE/Detail.CFM?MDRFOI__ID=6153430&pc=MTA	2023826-2016-01744		Injury	STAAR SURGICAL COMPANY	2016-12-07	MTA	ICL (IMPLANTABLE COLLAMER LENS)	Adverse Event Without Identified Device or Use Problem	Blurred Vision	P030016	Event Description: THE PATIENT REPORTED THE SURGEON IMPLANTED A 13.2MM MICL13.2 IMPLANTABLE COLLAMER LENS, -8.5 DIOPTER, IN HER RIGHT EYE (OD). THE PATIENT REPORTED HER VISION WAS SLIGHTLY BLURRY AT NIGHT AND IN DIM LIGHTING. THE LENS WAS IMPLANTED ON (B)(6) 2010 AND REMAINS IMPLANTED. THE FACILITY CONFIRMED THE INFORMATION AND INDICATED THE EVENT WAS DUE TO THE PATIENT HAD LARGE PUPILS AND WAS N…	OD	Patient	11/07/2016	2016	20
https://www.accessdata.fda.gov/scripts/cdrh/cfdocs/cfMAUDE/Detail.CFM?MDRFOI__ID=8887955&pc=MTA	2023826-2019-01354		Injury	STAAR SURGICAL COMPANY	2019-08-13 04:00:00	MTA	IMPLANTABLE COLLAMER LENS (ICL)	Adverse Event Without Identified Device or Use Problem	Blurred Vision	P030016	Event Description: THE REPORTER INDICATED THAT THE SURGEON IMPLANTED A 12.6MM MICL12.6, -6.5 DIOPTER, IMPLANTABLE COLLAMER LENS, INTO THE PATIENT'S EYE ON (B)(6) 2019. REPORTEDLY, "PATIENT WANTED BETTER NEAR VISION IN EYE AND SOME ASTIGMATISM WAS FOUND TO BE RELATED TO IT AS WELL." ON (B)(6) 2019 THE LENS WAS REMOVED AND EXCHANGED WITH A TORIC ICL. THIS RESOLVED THE PROBLEM. PER REPORTER ON (B)(6…	NA		07/18/2019	2019
https://www.accessdata.fda.gov/scripts/cdrh/cfdocs/cfMAUDE/Detail.CFM?MDRFOI__ID=4513718&pc=MTA	2023826-2015-00143		Injury	STAAR SURGICAL COMPANY	2015-02-12	MTA	VISIAN ICL (IMPLANTABLE COLLAMER LENS)	Appropriate Term/Code Not Available	Blurred Vision	P030016	Event Description: THE PATIENT REPORTED THE SURGEON IMPLANTED A 13.2MM MICL13.2 IMPLANTABLE COLLAMER LENS IN HER LEFT EYE (OS). THE PATIENT REPORTED THE LENS WAS EITHER REMOVED, REPLACED OR REPOSITIONED? ALSO ASTIGMATLISM IS RETURNING AND THERE IS SORENESS AND BLURRINESS. ADDITIONAL INFORMATION HAS BEEN REQUESTED BUT NONE HAS BEEN FORTHCOMING. IF ADDITIONAL INFORMATION IS RECEIVED, A SUPPLEMENTAL…	OS	Patient	01/15/2015	2015	39
https://www.accessdata.fda.gov/scripts/cdrh/cfdocs/cfMAUDE/Detail.CFM?MDRFOI__ID=7213979&pc=MTA	2023826-2018-00137	2017-11-01	Malfunction	STAAR SURGICAL COMPANY	2018-01-23	MTA	IMPLANTABLE COLLAMER LENS	Device Dislodged or Dislocated	Blurred Vision	N/A	Event Description: THE REPORTER STATED THAT THE SURGEON IMPLANTED A 12.6MM VICM12.6, -5.50 DIOPTER INTO THE PATIENT'S LEFT EYE (OS) ON (B)(6) 2014. THE SURGEON NOTES LENS ROTATION, LOSS OF BCVA, AND BLURRED VISION. REPORTEDLY, LENS REMAINS IMPLANTED. SURGEON REPORTS THE "ICL ON DEAD VERTICAL POSITION." Manufacturer Narrative: THIS PRODUCT IS NOT MARKETED IN THE U.S. (B)(4).	OS	Physician	12/29/2017	2017	21
https://www.accessdata.fda.gov/scripts/cdrh/cfdocs/cfMAUDE/Detail.CFM?MDRFOI__ID=7205806&pc=MTA	2023826-2018-00105	2015-11-30	Malfunction	STAAR SURGICAL COMPANY	2018-01-19	MTA	IMPLANTABLE COLLAMER LENS (ICL)	Device Operates Differently Than Expected	Blurred Vision	NA	Event Description: THE REPORTER INDICATED THAT THE SURGEON IMPLANTED A 13.2 MM VICMO13.2, -9.00 DIOPTER, IMPLANTABLE COLLAMER LENS IN THE PATIENT'S LEFT EYE (OS) ON (B)(6) 2015. REFRACTIVE SURPRISE WAS NOTICED. THE LENS REMAINS IMPLANTED IN THE EYE. ADDITIONAL INFORMATION HAS BEEN REQUESTED BUT NONE HAS BEEN FORTHCOMING. IF ADDITIONAL INFORMATION IS RECEIVED, A SUPPLEMENTAL MEDWATCH REPORT WILL B…	OS	Physician	12/20/2017	2017	24
https://www.accessdata.fda.gov/scripts/cdrh/cfdocs/cfMAUDE/Detail.CFM?MDRFOI__ID=6366306&pc=MTA	2023826-2017-00276	2017-01-16	Injury	STAAR SURGICAL COMPANY	2017-02-28	MTA	IMPLANTABLE COLLAMER LENS	Device Operates Differently Than Expected	Blurred Vision	NA	Event Description: THE REPORTER INDICATED THAT THE SURGEON IMPLANTED A 13.2 MM VICM5 13.2 IMPLANTABLE COLLAMER LENS, -13.50 DIOPTER, INTO THE PATIENT'S LEFT EYE (OS) ON (B)(6) 2016. ON (B)(6) 2017, THE PATIENT EXPERIENCED REFRACTIVE SURPRISE. AS OF THE DATE OF MDR SUBMISSION, THE LENS REMAINS IMPLANTED IN THE PATIENT AND THEREFORE, HAS NOT BEEN RETURNED FOR EVALUATION. Manufacturer Narrative: ON …	OS	Physician	01/31/2017	2017	40
https://www.accessdata.fda.gov/scripts/cdrh/cfdocs/cfMAUDE/Detail.CFM?MDRFOI__ID=6879884&pc=MTA	2023826-2017-01477	2017-08-24	Malfunction	STAAR SURGICAL COMPANY	2017-09-20	MTA	IMPLANTABLE COLLAMER LENS	Device Operates Differently Than Expected	Blurred Vision	NA	Event Description: THE REPORTER INDICATED THAT THE SURGEON IMPLANTED A 13.2 MM VICM5_13.2 IMPLANTABLE COLLAMER LENS, -11.5 DIOPTER, INTO THE PATIENT'S LEFT EYE (OS) ON (B)(6) 2017. ON (B)(6) 2017 A REFRACTIVE SURPRISE WAS NOTED BY THE SURGEON. ON 28-08-2017, DURING THE PATIENT'S LAST REPORTED VISIT, THE UCVA WAS MEASURED AT 20/20 AND THE RX +0.25 SPH. PER THE SURGEON NO LENS EXCHANGE IS NEEDED. T…	OS	Physician	08/24/2017	2017	39
https://www.accessdata.fda.gov/scripts/cdrh/cfdocs/cfMAUDE/Detail.CFM?MDRFOI__ID=7268465&pc=MTA	2023826-2018-00179	2018-01-15	Malfunction	STAAR SURGICAL COMPANY AG	2018-02-13	MTA	IMPLANTABLE COLLAMER LENS (ICL)	Device Operates Differently Than Expected	Blurred Vision	N/A	Event Description: THE REPORTER INDICATED THAT THE SURGEON IMPLANTED A 13.0 MM ICM130V4, -13.5 DIOPTER, IMPLANTABLE COLLAMER LENS IN THE PATIENT'S (OS) ON (B)(6) 2001. ON (B)(6) 2018, REFRACTIVE CHANGE OVER TIME WAS NOTICED. THE SURGEON IS MAKING PLANS TO EXCHANGE THE LENS. THE REPORTER STATED THAT THE REASON FOR THE REFRACTIVE CHANGE OVER TIME WAS BECAUSE OF PENETRATING KERATOPLASTY (PKP) PERFOR…	OS	Physician	01/16/2018	2018	43
https://www.accessdata.fda.gov/scripts/cdrh/cfdocs/cfMAUDE/Detail.CFM?MDRFOI__ID=7484263&pc=MTA	2023826-2018-00639	2018-02-01	Malfunction	STAAR SURGICAL COMPANY	2018-05-03	MTA	IMPLANTABLE COLLAMER LENS (ICL)	Device Operates Differently Than Expected	Blurred Vision	NA	Event Description: THE REPORTER INDICATED THE SURGEON IMPLANTED A 12.1MM VICM5_12.1 IMPLANTABLE COLLAMER LENS, -2.50 DIOPTER, INTO THE PATIENT'S RIGHT EYE (OD) ON (B)(6) 2018. THE SURGEON NOTES REFRACTIVE SURPRISE. TO DATE, THE LENS REMAINS IMPLANTED. Manufacturer Narrative: THIS PRODUCT IS MANUFACTURED IN THE U.S. BUT NOT MARKETED IN THE U.S. WORK ORDER SEARCH: NO SIMILAR COMPLAINT TYPE EVENTS R…	OD	Physician	04/04/2018	2018	45
https://www.accessdata.fda.gov/scripts/cdrh/cfdocs/cfMAUDE/Detail.CFM?MDRFOI__ID=7660090&pc=MTA	2023826-2018-01003	2018-06-04	Injury	STAAR SURGICAL COMPANY	2018-07-03	MTA	IMPLANTABLE COLLAMER LENS	Device Operates Differently Than Expected	Blurred Vision	NA	Event Description: THE REPORTER INDICATED THAT THE SURGEON IMPLANTED A 13.2 MM VICM6_13.2 IMPLANTABLE COLLAMER LENS, -5.5 DIOPTER INTO THE PATIENT'S LEFT EYE (OS) ON (B)(6) 2018. THE SURGEON REPORTS >2-LINE DROP OF BCVA AT THE 1-MONTH POSTOPERATIVE VISIT. UPON THE REPEAT EXAM OF THE BCDVA DURING A FOLLOW UP VISIT, IT WAS DETERMINED THAT, ALTHOUGH THERE WAS A 1-LINE IMPROVEMENT IN THE BEST CORRECT…	OS	Physician	06/13/2018	2018	49
https://www.accessdata.fda.gov/scripts/cdrh/cfdocs/cfMAUDE/Detail.CFM?MDRFOI__ID=6839063&pc=MTA	2023826-2017-01374		Malfunction	STAAR SURGICAL COMPANY	2017-09-01	MTA	IMPLANTABLE COLLAMER LENS (ICL)	Device Operates Differently Than Expected	Blurred Vision	P030016	Event Description: THE REPORTER INDICATED THAT THE SURGEON IMPLANTED AN MICL12.1, -9.5 DIOPTER, IMPLANTABLE COLLAMER LENS IN THE PATIENT'S RIGHT EYE (OD) ON (B)(6) 2017. REFRACTIVE SURPRISE WAS NOTICED AS THE PATIENT IS NOW APPROXIMATELY +1.25D SEQ POST-OP. THE SURGEON CONFIRMED THAT THE ICL IS SITTING IN THE CORRECT POSITION AND NOT INVERTED. HE ALSO VERIFIED THAT THE CYCLO WAS NOT SIGNIFICANTLY…	OD	Physician	08/03/2017	2017
https://www.accessdata.fda.gov/scripts/cdrh/cfdocs/cfMAUDE/Detail.CFM?MDRFOI__ID=6839072&pc=MTA	2023826-2017-01375		Malfunction	STAAR SURGICAL COMPANY	2017-09-01	MTA	IMPLANTABLE COLLAMER LENS (ICL)	Device Operates Differently Than Expected	Blurred Vision	P030016	Event Description: THE REPORTER INDICATED THAT THE SURGEON IMPLANTED AN MICL12.1, -10.5 DIOPTER, IMPLANTABLE COLLAMER LENS, IN THE PATIENT'S LEFT EYE (OS) ON (B)(6) 2017. REFRACTIVE SURPRISE WAS NOTICED. THE LENS REMAINS IMPLANTED. ATTEMPTS AT OBTAINING ADDITIONAL INFORMATION HAVE BEEN UNSUCCESSFUL. Manufacturer Narrative: CLAIM# (B)(4). Manufacturer Narrative: (B)(4).	OS	Physician	08/03/2017	2017
https://www.accessdata.fda.gov/scripts/cdrh/cfdocs/cfMAUDE/Detail.CFM?MDRFOI__ID=6978049&pc=MTA	2023826-2017-01625		Injury	STAAR SURGICAL COMPANY	2017-10-25	MTA	IMPLANTABLE COLLAMER LENS (ICL)	Device Operates Differently Than Expected	Blurred Vision	N/A	Event Description: THE REPORTER INDICATED THAT ON (B)(6) 2017 THE SURGEON IMPLANTED A 13.2MM VICMO13.2 IMPLANTABLE COLLAMER LENS, DIOPTER -12.00 INTO THE PATIENT'S LEFT (OS) EYE. REPORTEDLY, IMMEDIATELY AFTERWARD, THE PATIENT COMPLAINED OF A CIRCULAR "CLOUD" (BLURRED SPOT) IN HER FIELD OF VIEW JUST OFF-CENTER, ADJACENT TO HER CENTRAL VISION. THE SURGEON STATES THE "HOLE" OF THE LENS IS "VERY CLOS…	OS	Physician	09/29/2017	2017
https://www.accessdata.fda.gov/scripts/cdrh/cfdocs/cfMAUDE/Detail.CFM?MDRFOI__ID=4542565&pc=MTA	2023826-2015-00174	2014-12-01	Injury	STAAR SURGICAL COMPANY	2015-02-24	MTA	ICL (IMPLANTABLE COLLAMER LENS)	Inadequacy of Device Shape and/or Size	Blurred Vision	P030016	Event Description: THE REPORTER INDICATED THE SURGEON IMPLANTED A 13.0MM ICM130V4 IMPLANTABLE COLLAMER LENS IN THE PATIENT'S RIGHT EYE (OD) ON (B)(6) 2014. THE LENS WAS EXPLANTED ON (B)(6) 2014 DUE TO EXCESSIVE VAULTING. THE PATIENT EXPERIENCED REFRACTIVE CHANGE OVERTIME (OVERCORRECTION) AND BLURRED VISION. THE ICL WAS EXCHANGED FOR ANOTHER SAME MODEL LENS BUT A DIFFERENT DIOPTER POWER (-15.5), W…	OD	Nurse	01/28/2015	2015	48
https://www.accessdata.fda.gov/scripts/cdrh/cfdocs/cfMAUDE/Detail.CFM?MDRFOI__ID=7180685&pc=MTA	2023826-2018-00036	2017-12-11	Malfunction	STAAR SURGICAL COMPANY	2018-01-10	MTA	IMPLANTABLE COLLAMER LENS (ICL)	Inadequacy of Device Shape and/or Size	Blurred Vision	N/A	Event Description: THE REPORTER INDICATED THE SURGEON IMPLANTED A 12.0MM ICM120V4 IMPLANTABLE COLLAMER LENS, DIOPTER -13.0 INTO THE PATIENT'S LEFT EYE (OS) ON (B)(6) 2008. THE SURGEON REPORTS LOW VAULT AND REFRACTIVE SURPRISE; INCIDENT DATE OF (B)(6) 2017. Manufacturer Narrative: THE PRODUCT IS MANUFACTURED IN THE US, BUT NOT MARKETED IN THE US. CONCLUSION CODE: OFF-LABEL USE [UNDER 21 YEARS OF A…	OS	Physician	12/14/2017	2017	27
https://www.accessdata.fda.gov/scripts/cdrh/cfdocs/cfMAUDE/Detail.CFM?MDRFOI__ID=7180690&pc=MTA	2023826-2018-00037	2017-12-11	Malfunction	STAAR SURGICAL COMPANY	2018-01-10	MTA	IMPLANTABLE COLLAMER LENS (ICL)	Inadequacy of Device Shape and/or Size	Blurred Vision	N/A	Event Description: THE REPORTER INDICATED THE SURGEON IMPLANTED A 11.5MM ICM115V4 IMPLANTABLE COLLAMER LENS, DIOPTER -12.0 INTO THE PATIENT'S RIGHT EYE (OD) ON (B)(6) 2008. THE SURGEON REPORTS LOW VAULT AND REFRACTIVE SURPRISE; INCIDENT DATE OF (B)(6) 2017. Manufacturer Narrative: CORRECTED INFORMATION: THE LENS REMAINS IMPLANTED. THE LENS IS PLANNED TO BE EXCHANGED. CLAIM# (B)(4). Manufacturer N…	OD	Physician	12/14/2017	2017	27
https://www.accessdata.fda.gov/scripts/cdrh/cfdocs/cfMAUDE/Detail.CFM?MDRFOI__ID=10524328&pc=MTA	2023826-2020-02041	2020-08-03 04:00:00	Injury	STAAR SURGICAL COMPANY	2020-09-11 04:00:00	MTA	IMPLANTABLE COLLAMER LENS (ICL)	Inadequacy of Device Shape and/or Size	Blurred Vision	N/A#S-P#N/A	Event Description: THE REPORTER INDICATED THAT A 12.6MM, VICM5_12.6, -4.00, IMPLANTABLE COLLAMER LENS WAS IMPLANTED INTO THE PATIENT'S RIGHT EYE (OD) ON (B)(6) 2017. LOW VAULT AND REFRACTIVE CHANGE OVER TIME WERE REPORTED. THE LENS REMAINS IMPLANTED. Manufacturer Narrative: B5-UPDATED INFORMATION: ON (B)(6) 2020 THE LENS WAS EXCHANGED WITH A LONGER LENS AND PROBLEM WAS RESOLVED. CLAIM# (B)(4). Ma…	OD		08/14/2020	2020	38
https://www.accessdata.fda.gov/scripts/cdrh/cfdocs/cfMAUDE/Detail.CFM?MDRFOI__ID=10524391&pc=MTA	2023826-2020-02040	2020-08-03 04:00:00	Injury	STAAR SURGICAL COMPANY	2020-09-11 04:00:00	MTA	IMPLANTABLE COLLAMER LENS (ICL)	Inadequacy of Device Shape and/or Size	Blurred Vision	N/A#S-P#N/A	Event Description: THE REPORTER INDICATED THAT A 12.6MM, VICM5_12.6, -4.50, IMPLANTABLE COLLAMER LENS WAS IMPLANTED INTO THE PATIENT'S LEFT EYE (OS) ON (B)(6) 2017. LOW VAULT AND REFRACTIVE CHANGE OVER TIME WERE REPORTED. THE LENS REMAINS IMPLANTED. Manufacturer Narrative: B5-UPDATED INFORMATION: ON (B)(6) 2020 THE LENS WAS EXCHANGED WITH A LONGER LENS AND THE PROBLEM WAS RESOLVED. CLAIM# (B)(4).…	OS		08/14/2020	2020	38
https://www.accessdata.fda.gov/scripts/cdrh/cfdocs/cfMAUDE/Detail.CFM?MDRFOI__ID=16030056&pc=MTA	2023826-2022-04436	2021-04-08 04:00:00	Injury	STAAR SURGICAL COMPANY	2022-12-21 05:00:00	MTA	IMPLANTABLE COLLAMER LENS (ICL)	Inadequacy of Device Shape and/or Size	Blurred Vision	P030016	Event Description: THE REPORTER INDICATED THAT A 12.6MM VICMO12.6 IMPLANTABLE COLLAMER LENS -8.00 DIOPTER WAS IMPLANTED INTO THE PATIENT'S LEFT EYE (OS) ON (B)(6) 2019. ON (B)(6) 2021 THE LENS WAS EXCHANGED FOR A LONGER LENGTH LENS OF DIFFERENT POWER DUE TO LOW VAULT AND REFRACTIVE SURPRISE. THIS EXCHANGED RESOLVED THE PROBLEM. CAUSE OF EVENT WAS UNKNOWN. Manufacturer Narrative: LENS WORK ORDER S…	OS	Physician	11/22/2022	2022	34	Female
https://www.accessdata.fda.gov/scripts/cdrh/cfdocs/cfMAUDE/Detail.CFM?MDRFOI__ID=12029739&pc=MTA	2023826-2021-01917	2021-05-17 04:00:00	Injury	STAAR SURGICAL COMPANY	2021-06-19 04:00:00	MTA	IMPLANTABLE COLLAMER LENS (ICL)	Inadequacy of Device Shape and/or Size	Blurred Vision	NA	Event Description: THE REPORTER INDICATED THAT A 12.6MM, VICM5_12.6, -3.50 DIOPTER, IMPLANTABLE COLLAMER LENS WAS IMPLANTED INTO THE PATIENTS LEFT EYE (OS) ON (B)(6) 2020. LOW VAULT AND REFRACTIVE CHANGE OVERTIME WAS OBSERVED. LENS REMAINS IMPLANTED. IF ADDITIONAL INFORMATION IS RECEIVED A SUPPLEMENTAL MEDWATCH REPORT WILL BE SUBMITTED. Manufacturer Narrative: B5- THE REPORTER INDICATED THAT A 12…	OS	Physician	05/20/2021	2021	42	Male
https://www.accessdata.fda.gov/scripts/cdrh/cfdocs/cfMAUDE/Detail.CFM?MDRFOI__ID=17592022&pc=MTA	2023826-2023-03621	2023-07-19 04:00:00	Injury	STAAR SURGICAL COMPANY	2023-08-21 04:00:00	MTA	IMPLANTABLE COLLAMER LENS (ICL)	Inadequacy of Device Shape and/or Size; Patient-Device Incompatibility	Blurred Vision	P030016	Event Description: THE REPORTER INDICATED THAT A 12.6MM VICMO12.6 IMPLANTABLE COLLAMER LENS OF -11.0 DIOPTER WAS IMPLANTED INTO THE PATIENT'S RIGHT EYE (OD) ON (B)(6) 2023. IN A SUBSEQUENT SURGERY LATER THAT DAY, THE LENS WAS EXCHANGED FOR A LONGER LENGTH LENS DUE LOW VAULT WITHOUT ROTATION. THE PROBLEM WAS RESOLVED. CAUSE OF THE EVENT WAS A PATIENT RELATED FACTOR. Manufacturer Narrative: CORRECT…	OD	Physician	08/01/2023	2023	25	Male
https://www.accessdata.fda.gov/scripts/cdrh/cfdocs/cfMAUDE/Detail.CFM?MDRFOI__ID=15784581&pc=MTA	2023826-2022-04080	2018-03-27 04:00:00	Injury	STAAR SURGICAL COMPANY	2022-11-11 05:00:00	MTA	IMPLANTABLE COLLAMER LENS (ICL)	Misfocusing	Blurred Vision	P030016	Event Description: THE REPORTER INDICATED THE SURGEON IMPLANTED A 12.6MM MICL12.6 IMPLANTABLE COLLAMER LENS, -06.50 DIOPTER, IN THE PATIENTS LEFT EYE (OS) ON (B)(6) 2018. THE PATIENT EXPERIENCED A REFRACTIVE SURPRISE AND BLURRED VISION. THE CAUSE OF THE EVENT WAS DUE TO THE DEVICE. ADDITIONAL INFORMATION HAS BEEN REQUESTED BUT NONE HAS BEEN FORTHCOMING. Manufacturer Narrative: (B)(4). CLAIM # (B)…	OS	Physician	10/12/2022	2022	27	Female
https://www.accessdata.fda.gov/scripts/cdrh/cfdocs/cfMAUDE/Detail.CFM?MDRFOI__ID=11823161&pc=MTA	2023826-2021-01483	2018-04-02	Injury	STAAR SURGICAL COMPANY	2021-05-13	MTA	IMPLANTABLE COLLAMER LENS	Misfocusing	Blurred Vision	NA	Event Description: THE REPORTER INDICATED THAT THE SURGEON IMPLANTED A 13.2MM VICMO13.2 IMPLANTABLE COLLAMER LENS, -11.5 DIOPTER, INTO THE PATIENT'S LEFT EYE (OS) ON (B)(6) 2017. ON (B)(6) 2018 THE LENS WAS EXCHANGED WITH A SAME SIZE DIFFERENT DIOPTER LENS DUE TO REFRACTIVE SURPRISE. THE PROBLEM WAS RESOLVED. THE CAUSE OF THE EVENT IS REPORTED AS UNKNOWN. Manufacturer Narrative: PMA/510(K): THIS …	OS	Physician	04/22/2021	2021	23
https://www.accessdata.fda.gov/scripts/cdrh/cfdocs/cfMAUDE/Detail.CFM?MDRFOI__ID=11751185&pc=MTA	2023826-2021-01281	2018-04-28 04:00:00	Injury	STAAR SURGICAL COMPANY	2021-04-30 04:00:00	MTA	IMPLANTABLE COLLAMER LENS (ICL)	Misfocusing	Blurred Vision	NA	Event Description: THE REPORTER INDICATED THAT A 13.2MM, VICMO13.2, -11.00 DIOPTER, IMPLANTABLE COLLAMER LENS WAS IMPLANTED INTO THE PATIENTS LEFT EYE (OS) ON (B)(6) 2017. ON (B)(6) 2018 THE LENS WAS EXCHANGED FOR A DIFFERENT MODEL AND DIOPTER LENS DUE TO REFRACTIVE SURPRISE. THIS EXCHANGE RESOLVED THE PROBLEM. CAUSE OF EVENT WAS REPORTER AS UNKNOWN. Manufacturer Narrative: ADDITIONAL INFORMATION…	OS		03/31/2021	2021	23
https://www.accessdata.fda.gov/scripts/cdrh/cfdocs/cfMAUDE/Detail.CFM?MDRFOI__ID=7696925&pc=MTA	2023826-2018-01042	2018-06-18	Injury	STAAR SURGICAL COMPANY	2018-07-17	MTA	IMPLANTABLE COLLAMER LENS	Misfocusing	Blurred Vision	NA	Event Description: THE REPORTER INDICATED THAT THE SURGEON IMPLANTED A 13.2MM VICM6_13.2 IMPLANTABLE COLLAMER LENS, -5.5 DIOPTER INTO THE PATIENT'S RIGHT EYE (OD) ON (B)(6) 2018. THE SURGEON REPORTS A 2-LINE DROP IN BCDVA COMPARED TO THE PREOPERATIVE EXAM. THE LENS REMAINS IMPLANTED AND THE INVESTIGATION IS ONGOING. Manufacturer Narrative: ADDITIONAL INFORMATION: IN THE SURGEON'S OPINION, THE CAU…	OD	Physician	06/20/2018	2018	49
https://www.accessdata.fda.gov/scripts/cdrh/cfdocs/cfMAUDE/Detail.CFM?MDRFOI__ID=7799794&pc=MTA	2023826-2018-01251	2018-07-26	Injury	STAAR SURGICAL COMPANY	2018-08-20	MTA	IMPLANTABLE COLLAMER LENS	Misfocusing	Blurred Vision	NA	Event Description: THE REPORTER INDICATED THAT THE SURGEON IMPLANTED A 13.2MM VICM6_13.2 IMPLANTABLE COLLAMER LENS, -4.5 DIOPTER INTO THE PATIENT'S LEFT EYE (OS) ON (B)(6) 2018. REPORTEDLY, THERE WAS A >/= 2-LINE DROP IN BCDVA NOTED AT THE PATIENT'S 1-MONTH POSTOPERATIVE VISIT. IN THE SURGEON'S OPINION, THE CAUSE OF THIS EVENT IS THE DEVICE. AT THE PATIENT'S LAST VISIT THE SURGEON STATES THERE IS…	OS	Physician	07/26/2018	2018	54
https://www.accessdata.fda.gov/scripts/cdrh/cfdocs/cfMAUDE/Detail.CFM?MDRFOI__ID=11351020&pc=MTA	2023826-2021-00491	2018-08-01	Injury	STAAR SURGICAL COMPANY	2021-02-19	MTA	IMPLANTABLE COLLAMER LENS (ICL)	Misfocusing	Blurred Vision	NA	Event Description: THE REPORTER INDICATED THAT A 13.7MM, VICMO13.7 -14.50 DIOPTER, IMPLANTABLE COLLAMER LENS WAS IMPLANTED INTO THE PATIENTS LEFT EYE (OS) ON (B)(6) 2018. ON (B)(6) 2018 THE LENS WAS EXCHANGED FOR A DIFFERENT DIOPTER LENS DUE TO REFRACTIVE SURPRISE. THIS EXCHANGE RESOLVED THE PROBLEM. CAUSE OF EVENT WAS REPORTED AS UNKNOWN. Manufacturer Narrative: THIS PRODUCT IS NOT MARKETED IN T…	OS	Physician	01/20/2021	2021	34
https://www.accessdata.fda.gov/scripts/cdrh/cfdocs/cfMAUDE/Detail.CFM?MDRFOI__ID=11351101&pc=MTA	2023826-2021-00492	2018-08-01	Injury	STAAR SURGICAL COMPANY	2021-02-19	MTA	IMPLANTABLE COLLAMER LENS (ICL)	Misfocusing	Blurred Vision	NA	Event Description: THE REPORTER INDICATED THAT A 13.7MM, VICMO13.7 -13.00 DIOPTER, IMPLANTABLE COLLAMER LENS WAS IMPLANTED INTO THE PATIENTS RIGHT EYE (OD) ON (B)(6) 2018. ON (B)(6) 2018 THE LENS WAS EXCHANGED FOR A DIFFERENT DIOPTER LENS DUE TO REFRACTIVE SURPRISE. THIS EXCHANGE RESOLVED THE PROBLEM. CAUSE OF EVENT WAS REPORTED AS UNKNOWN. Manufacturer Narrative: THIS PRODUCT IS NOT MARKETED IN …	OD	Physician	01/20/2021	2021	34
https://www.accessdata.fda.gov/scripts/cdrh/cfdocs/cfMAUDE/Detail.CFM?MDRFOI__ID=11721899&pc=MTA	2023826-2021-01018	2018-08-04 04:00:00	Injury	STAAR SURGICAL COMPANY	2021-04-25 04:00:00	MTA	IMPLANTABLE COLLAMER LENS (ICL)	Misfocusing	Blurred Vision	N/A	Event Description: THE REPORTER INDICATED THAT THE SURGEON IMPLANTED A 12.6MM VICMO12.6, -09.00 DIOPTER, IMPLANTABLE COLLAMER LENS INTO THE PATIENT'S LEFT EYE (OS) ON (B)(6) 2018. THE LENS WAS EXCHANGED WITH A FOR A SAME LENGTH TORIC LENS DUE TO REFRACTIVE SURPRISE ON (B)(6) 2018. THIS RESOLVED THE PROBLEM. CAUSE OF THE EVENT IS REPORTED AS UNKNOWN. Manufacturer Narrative: DEVICE EVALUATION: THE …	OS		03/30/2021	2021	26
https://www.accessdata.fda.gov/scripts/cdrh/cfdocs/cfMAUDE/Detail.CFM?MDRFOI__ID=8452978&pc=MTA	2023826-2019-00489	2018-10-02	Malfunction	STAAR SURGICAL COMPANY	2019-03-26	MTA	IMPLANTABLE COLLAMER LENS	Misfocusing	Blurred Vision	NA	Event Description: THE REPORTER INDICATED THAT THE SURGEON IMPLANTED A 13.2MM VICM5_13.2 IMPLANTABLE COLLAMER LENS, -4.0 DIOPTER INTO THE PATIENT'S RIGHT EYE (OD) ON (B)(6) 2018. THE SURGEON REPORTS REFRACTIVE SURPRISE. THE CAUSE OF THE EVENT IS REPORTED AS UNKNOWN. REPORTEDLY, THE LENS REMAINS IMPLANTED. Manufacturer Narrative: PRODUCT IS MANUFACTURED BUT NOT SOLD IN THE U.S. LENS WORK ORDER SEA…	OD	Physician	03/01/2019	2019	32
https://www.accessdata.fda.gov/scripts/cdrh/cfdocs/cfMAUDE/Detail.CFM?MDRFOI__ID=11721905&pc=MTA	2023826-2021-01025	2018-10-14	Injury	STAAR SURGICAL COMPANY	2021-04-25	MTA	IMPLANTABLE COLLAMER LENS (ICL)	Misfocusing	Blurred Vision	N/A	Event Description: THE REPORTER INDICATED THAT THE SURGEON IMPLANTED A 12.6MM VICMO12.6, -08.50 DIOPTER, IMPLANTABLE COLLAMER LENS INTO THE PATIENT'S LEFT EYE (OS) ON (B)(6) 2017. THE LENS WAS REPLACED WITH A LONGER LENGTH LENS DUE TO REFRACTIVE CHANGE OVER TIME ON (B)(6) 2019. THIS RESOLVED THE PROBLEM.CAUSE OF THE EVENT IS REPORTED AS UNKNOWN. Manufacturer Narrative: WEIGHT: UNK. ETHNICITY: UNK…	OS	Physician	03/31/2021	2021	35
https://www.accessdata.fda.gov/scripts/cdrh/cfdocs/cfMAUDE/Detail.CFM?MDRFOI__ID=11351898&pc=MTA	2023826-2021-00494	2019-03-01 05:00:00	Injury	STAAR SURGICAL COMPANY	2021-02-19 05:00:00	MTA	IMPLANTABLE COLLAMER LENS (ICL)	Misfocusing	Blurred Vision	NA	Event Description: THE REPORTER INDICATED THAT A 12.6MM, VICMO12.6 -9.50 DIOPTER, IMPLANTABLE COLLAMER LENS WAS IMPLANTED INTO THE PATIENTS RIGHT EYE (OD) ON (B)(6) 2019. ON (B)(6) 2019. THE LENS WAS EXCHANGED FOR A DIFFERENT DIOPTER AND LENGTH LENS DUE TO REFRACTIVE SURPRISE. THIS EXCHANGE RESOLVED THE PROBLEM. CAUSE OF EVENT WAS REPORTED AS UNKNOWN. Manufacturer Narrative: H3 - DEVICE EVALUATIO…	OD		01/20/2021	2021	23
https://www.accessdata.fda.gov/scripts/cdrh/cfdocs/cfMAUDE/Detail.CFM?MDRFOI__ID=8740571&pc=MTA	2023826-2019-01152	2019-03-22	Malfunction	STAAR SURGICAL COMPANY	2019-06-27	MTA	IMPLANTABLE COLLAMER LENS (ICL)	Misfocusing	Blurred Vision	NA	Event Description: THE REPORTER INDICATED THE SURGEON IMPLANTED A 13.2MM VICM5_13.2 IMPLANTABLE COLLAMER LENS, - 08.00 DIOPTER IN THE PATIENT'S LEFT EYE (OS), ON (B)(6) 2019. THE PATIENT EXPERIENCED A REFRACTIVE SURPRISE. THE LENS REMAINS IMPLANTED. ADDITIONAL INFORMATION HAS BEEN REQUESTED BUT NONE HAS BEEN FORTHCOMING. IF ADDITIONAL INFORMATION IS RECEIVED, A SUPPLEMENTAL MEDWATCH WILL BE SUBMI…	OS	Physician	05/28/2019	2019	21
https://www.accessdata.fda.gov/scripts/cdrh/cfdocs/cfMAUDE/Detail.CFM?MDRFOI__ID=8764776&pc=MTA	2023826-2019-01147	2019-04-04 04:00:00	Injury	STAAR SURGICAL COMPANY	2019-07-05 04:00:00	MTA	IMPLANTABLE COLLAMER LENS (ICL)	Misfocusing	Blurred Vision	N/A	Event Description: THE REPORTER INDICATED THAT A 12.1 MM, VICM5_12.1, -5.0 DIOPTER, IMPLANTABLE COLLAMER LENS WAS IMPLANTED INTO THE PATIENTS LEFT EYE (OS) ON (B)(6) 2019. ON (B)(6) 2019 THE LENS WAS EXCHANGED FOR A DIFFERENT DIOPTER LENS. THIS EXCHANGE RESOLVED THE PROBLEM. Manufacturer Narrative: FILLED IN KNOWN LOT NUMBERS. CONCLUSION CODE 4310: DIMENSIONAL AND FUNCTIONAL INSPECTION FOUND THE …	OS		06/11/2019	2019	31
https://www.accessdata.fda.gov/scripts/cdrh/cfdocs/cfMAUDE/Detail.CFM?MDRFOI__ID=11322922&pc=MTA	2023826-2021-00422	2019-05-06 04:00:00	Injury	STAAR SURGICAL COMPANY	2021-02-12 05:00:00	MTA	IMPLANTABLE COLLAMER LENS (ICL)	Misfocusing	Blurred Vision	NA	Event Description: THE REPORTER INDICATED THAT A 12.6MM, VIICMO12.6, -16.0 DIOPTER, IMPLANTABLE COLLAMER LENS WAS IMPLANTED INTO THE PATIENTS RIGHT EYE (OD) ON (B)(6) 2018. ON (B)(6) 2019 THE LENS EXCHANGED FOR A DIFFERENT DIOPTER LENS DUE TO REFRACTIVE SURPRISE. THIS EXCHANGE RESOLVED THE PROBLEM. CAUSE OF THE EVENT WAS REPORTER AS UNKNOWN. Manufacturer Narrative: H3 - DEVICE EVALUATION: THE LEN…	OD	Physician	01/13/2021	2021	28	Female
https://www.accessdata.fda.gov/scripts/cdrh/cfdocs/cfMAUDE/Detail.CFM?MDRFOI__ID=8846158&pc=MTA	2023826-2019-01210	2019-06-04 04:00:00	Injury	STAAR SURGICAL COMPANY	2019-07-31 04:00:00	MTA	IMPLANTABLE COLLAMER LENS (ICL)	Misfocusing	Blurred Vision	N/A	Event Description: THE REPORTER INDICATED THAT A 12.6MM, VICM5_12.6, -11.00 DIOPTER, IMPLANTABLE COLLAMER LENS WAS IMPLANTED INTO THE PATIENT'S LEFT EYE (OS) ON (B)(6) 2019. REFRACTIVE SURPRISE WAS OBSERVED, THE LENS WAS REMOVED ON (B)(6) 2019. REPORTEDLY, "PATIENT WANTS TO WAIT AND WEAR GLASSES AGAIN." Manufacturer Narrative: LENS RETURNED TO MANUFACTURER IN PREVIOUS MDR IS INCORECT. THE CORRECT…	OS		07/04/2019	2019	35
https://www.accessdata.fda.gov/scripts/cdrh/cfdocs/cfMAUDE/Detail.CFM?MDRFOI__ID=9492339&pc=MTA	2023826-2019-02405	2019-11-05 05:00:00	Injury	STAAR SURGICAL COMPANY	2019-12-19 05:00:00	MTA	IMPLANTABLE COLLAMER LENS (ICL)	Misfocusing	Blurred Vision	NA	Event Description: THE REPORTER INDICATED THE SURGEON IMPLANTED A 12.1MM VICM5_12.1 IMPLANTABLE COLLAMER LENS, -03.50 DIOPTER, IN THE PATIENTS LEFT EYE (OS), ON (B)(6) 2019. THE PATIENT EXPERIENCED A REFRACTIVE SURPRISE AND THE LENS REMAINS IMPLANTED. THE SURGEON PLANS TO EXPLANT AND EXCHANGE THE LENS. Manufacturer Narrative: ADDITIONAL INFORMATION: B5- "LENS WAS EXCHANGED ON (B)(6) 2020 WITH A L…	OS		11/18/2019	2019	29
https://www.accessdata.fda.gov/scripts/cdrh/cfdocs/cfMAUDE/Detail.CFM?MDRFOI__ID=9814218&pc=MTA	2023826-2020-00408	2020-02-19 05:00:00	Injury	STAAR SURGICAL COMPANY	2020-03-10 04:00:00	MTA	IMPLANTABLE COLLAMER LENS (ICL)	Misfocusing	Blurred Vision	P030016	Event Description: THE REPORTER INDICATED THE SURGEON IMPLANTED A 13.2MM MICL13.2 IMPLANTABLE COLLAMER LENS, -9.00 DIOPTER, IN THE PATIENTS RIGHT EYE (OD) ON (B)(6) 2020 AS A REPLACEMENT LENS, SEE MFR REPORT # 2023826-2020-00407 FOR INITIAL LENS. THE REPORTER INDICATED POST-OP, THE PATIENT HAD LOSS OF VISUAL ACUITY. TO DATE, THE BCVA HAS NOT INCREASED BUT VAULT IS BETTER. THE LENS REMAINED IMPLAN…	OD		02/25/2020	2020	28
https://www.accessdata.fda.gov/scripts/cdrh/cfdocs/cfMAUDE/Detail.CFM?MDRFOI__ID=9988384&pc=MTA	2023826-2020-00955	2020-03-30	Malfunction	STAAR SURGICAL COMPANY	2020-04-22	MTA	IMPLANTABLE COLLAMER LENS (ICL)	Misfocusing	Blurred Vision	NA	Event Description: THE REPORTER INDICATED THE SURGEON IMPLANTED A 13.2MM VICM5_13.2 IMPLANTABLE COLLAMER LENS, -06.50 DIOPTER, IN THE PATIENTS LEFT EYE (OS), ON (B)(6) 2020. THE LENS WAS IMPLANTED AS AN EXCHANGE LENS AND IT WAS UNKNOWN IF THE PROBLEM WAS RESOLVED, IF THE PATIENT STILL EXPERIENCED A REFRACTIVE SURPRISE. SEE MFR REPORT # 2023826-2020-00954 FOR THE INITIAL LENS. THE CAUSE OF THE EVE…	OS	Physician	04/05/2020	2020	28
https://www.accessdata.fda.gov/scripts/cdrh/cfdocs/cfMAUDE/Detail.CFM?MDRFOI__ID=10002861&pc=MTA	2023826-2020-00977	2020-04-01 04:00:00	Injury	STAAR SURGICAL COMPANY	2020-04-27 04:00:00	MTA	IMPLANTABLE COLLAMER LENS (ICL)	Misfocusing	Blurred Vision	NA	Event Description: THE REPORTER INDICATED THAT THE SURGEON IMPLANTED A 12.6MM VICM5_12.6 IMPLANTABLE COLLAMER LENS, DIOPTER -2.25 INTO THE PATIENT'S LEFT EYE (OS) ON (B)(6) 2019. THE SURGEON NOTES REFRACTIVE SURPRISE. REPORTEDLY THE LENS REMAINS IMPLANTED. THE CAUSE OF THE EVENT IS REPORTED AS UNKNOWN. Manufacturer Narrative: B5: ON (B)(6) 2021; THE LENS WAS REMOVED AND A SAME MODEL; SAME LENGTH …	OS	Physician	04/01/2020	2020	45	Female
https://www.accessdata.fda.gov/scripts/cdrh/cfdocs/cfMAUDE/Detail.CFM?MDRFOI__ID=13459229&pc=MTA	2023826-2022-00385	2020-04-16 04:00:00	Injury	STAAR SURGICAL COMPANY	2022-02-04 05:00:00	MTA	IMPLANTABLE COLLAMER LENS	Misfocusing	Blurred Vision	NA	Event Description: THE REPORTER INDICATED THAT THE SURGEON IMPLANTED A 13.2MM VICMO13.2 IMPLANTABLE COLLAMER LENS -6.5 DIOPTER INTO THE PATIENT'S RIGHT EYE (OD) ON (B)(6) 2020. ON (B)(6) 2020 THE LENS WAS EXCHANGED WITH A SAME SIZE DIFFERENT DIOPTER LENS DUE TO REFRACTIVE SURPRISE. THE PROBLEM WAS RESOLVED. THE CAUSE OF THE EVENT IS REPORTED AS UNKNOWN. Manufacturer Narrative: WEIGHT, RACE, ETHNI…	OD	Physician	01/11/2022	2022	24	Female
https://www.accessdata.fda.gov/scripts/cdrh/cfdocs/cfMAUDE/Detail.CFM?MDRFOI__ID=11453113&pc=MTA	2023826-2021-00603	2020-05-28 04:00:00	Injury	STAAR SURGICAL COMPANY	2021-03-10 05:00:00	MTA	IMPLANTABLE COLLAMER LENS (ICL)	Misfocusing	Blurred Vision	N/A	Event Description: THE REPORTER INDICATED THAT A 12.1MM, VICMO 12.1, -05.50 DIOPTER, IMPLANTABLE COLLAMER LENS WAS IMPLANTED INTO THE PATIENT'S LEFT EYE (OS) ON (B)(6) 2019. ON (B)(6) 2020 THE LENS WAS EXCHANGED WITH A SAME LENGTH TORIC LENS ( -6.00/1.0/082 (SPHERE/CYLINDER/AXIS)) LENS DUE TO REFRACTIVE SURPRISE. THE PROBLEM WAS RESOLVED. CAUSE OF THE EVENT IS REPORTED AS UNKNOWN. Manufacturer Na…	OS		02/19/2021	2021	28
https://www.accessdata.fda.gov/scripts/cdrh/cfdocs/cfMAUDE/Detail.CFM?MDRFOI__ID=10577512&pc=MTA	2023826-2020-02194	2020-05-30 04:00:00	Injury	STAAR SURGICAL COMPANY	2020-09-23 04:00:00	MTA	IMPLANTABLE COLLAMER LENS	Misfocusing	Blurred Vision	NA	Event Description: THE REPORTER INDICATED THAT THE SURGEON IMPLANTED A 12.6MM VICM5_12.6 IMPLANTABLE COLLAMER LENS, -4.0 DIOPTER INTO THE PATIENT'S RIGHT EYE (OD) ON (B)(6) 2020. REPORTEDLY, THE LENS WAS EXPLANTED ON (B)(6) 2020. ON (B)(6) 2020 THE LENS WAS REPLACED WITH A SAME SIZE, DIFFERENT DIOPTER LENS DUE TO REFRACTIVE SURPRISE. THE PROBLEM WAS RESOLVED. THE CAUSE OF THE EVENT IS REPORTED AS…	OD		08/28/2020	2020	33
https://www.accessdata.fda.gov/scripts/cdrh/cfdocs/cfMAUDE/Detail.CFM?MDRFOI__ID=11098617&pc=MTA	2023826-2020-03256	2020-06-24 04:00:00	Injury	STAAR SURGICAL COMPANY	2020-12-30 05:00:00	MTA	IMPLANTABLE COLLAMER LENS	Misfocusing	Blurred Vision	N/A	Event Description: THE REPORTER INDICATED THAT THE SURGEON IMPLANTED A 12.6MM VICM5_12.6 IMPLANTABLE COLLAMER LENS, -10.0 DIOPTER INTO THE PATIENT'S LEFT EYE (OS) ON (B)(6) 2020. ON (B)(6) 2020 THE LENS WAS EXCHANGED FOR A SAME SIZE, DIFFERENT MODEL LENS DUE TO REFRACTIVE SURPRISE. THE PROBLEM WAS RESOLVED. THE CAUSE OF THE EVENT IS REPORTED AS A PATIENT-RELATED FACTOR. Manufacturer Narrative: AD…	OS		12/08/2020	2020	36
https://www.accessdata.fda.gov/scripts/cdrh/cfdocs/cfMAUDE/Detail.CFM?MDRFOI__ID=11098631&pc=MTA	2023826-2020-03255	2020-06-24 04:00:00	Injury	STAAR SURGICAL COMPANY	2020-12-30 05:00:00	MTA	IMPLANTABLE COLLAMER LENS	Misfocusing	Blurred Vision	N/A	Event Description: THE REPORTER INDICATED THAT THE SURGEON IMPLANTED A 12.6MM VICM5_12.6 IMPLANTABLE COLLAMER LENS, -11.0 DIOPTER INTO THE PATIENT'S RIGHT EYE (OD) ON (B)(6) 2020. ON (B)(6) 2020 THE LENS WAS EXCHANGED FOR A SAME SIZE, DIFFERENT MODEL LENS DUE TO REFRACTIVE SURPRISE. THE PROBLEM WAS RESOLVED. THE CAUSE OF THE EVENT IS REPORTED AS A PATIENT-RELATED FACTOR. Manufacturer Narrative: A…	OD		12/08/2020	2020	36
https://www.accessdata.fda.gov/scripts/cdrh/cfdocs/cfMAUDE/Detail.CFM?MDRFOI__ID=12171163&pc=MTA	2023826-2021-02584	2020-07-01	Injury	STAAR SURGICAL COMPANY	2021-07-15	MTA	IMPLANTABLE COLLAMER LENS (ICL)	Misfocusing	Blurred Vision	NA	Event Description: THE REPORTER INDICATED THAT A 12.6MM, VICMO12.6, -8.5 DIOPTER, IMPLANTABLE COLLAMER LENS WAS IMPLANTED INTO THE PATIENTS RIGHT EYE (OD) ON (B)(6) 2020. ON (B)(6) 2020 THE LENS WAS EXCHANGED FOR A DIFFERENT MODEL AND DIOPTER LENS DUE TO REFRACTIVE CHANGE OVERTIME. THIS EXCHANGE RESOLVED THE PROBLEM. CAUSE OF EVENT WAS UNKNOWN. Manufacturer Narrative: PT INFO: UNK. PMA/510K: THIS…	OD	Physician	06/14/2021	2021	31
https://www.accessdata.fda.gov/scripts/cdrh/cfdocs/cfMAUDE/Detail.CFM?MDRFOI__ID=12148282&pc=MTA	2023826-2021-02429	2020-07-20 04:00:00	Injury	STAAR SURGICAL COMPANY	2021-07-11 04:00:00	MTA	IMPLANTABLE COLLAMER LENS	Misfocusing	Blurred Vision	NA	Event Description: THE REPORTER INDICATED THAT THE SURGEON IMPLANTED A 13.7MM VICMO13.7 IMPLANTABLE COLLAMER LENS, -6.5 DIOPTER, INTO THE PATIENT'S RIGHT EYE (OD) ON (B)(6) 2020. REPORTEDLY, THE LENS WAS EXPLANTED AND REPLACED ON (B)(6) 2020 WITH A SAME SIZE DIFFERENT DIOPTER LENS DUE TO REFRACTIVE SURPRISE. THE PROBLEM WAS RESOLVED. THE CAUSE OF THE EVENT IS REPORTED AS DEVICE. Manufacturer Narr…	OD		06/14/2021	2021	23
https://www.accessdata.fda.gov/scripts/cdrh/cfdocs/cfMAUDE/Detail.CFM?MDRFOI__ID=11620598&pc=MTA	2023826-2021-00877	2020-07-24 04:00:00	Injury	STAAR SURGICAL COMPANY	2021-04-06 04:00:00	MTA	IMPLANTABLE COLLAMER LENS	Misfocusing	Blurred Vision	NA	Event Description: THE REPORTER INDICATED THAT THE SURGEON IMPLANTED A 13.2MM VICMO13.2 IMPLANTABLE COLLAMER LENS, -9.0 DIOPTER, INTO THE PATIENT'S LEFT EYE (OS) ON (B)(6) 2020. REPORTEDLY, THE LENS WAS EXCHANGED ON (B)(6) 2020 WITH A SHORTER LENGTH DIFFERENT MODEL LENS DUE TO REFRACTIVE SURPRISE. THE PROBLEM WAS RESOLVED. THE CAUSE OF THE EVENT IS REPORTED AS UNKNOWN. Manufacturer Narrative: H3 …	OS		03/14/2021	2021	21
https://www.accessdata.fda.gov/scripts/cdrh/cfdocs/cfMAUDE/Detail.CFM?MDRFOI__ID=11620605&pc=MTA	2023826-2021-00876	2020-07-24 04:00:00	Injury	STAAR SURGICAL COMPANY	2021-04-06 04:00:00	MTA	IMPLANTABLE COLLAMER LENS	Misfocusing	Blurred Vision	NA	Event Description: THE REPORTER INDICATED THAT THE SURGEON IMPLANTED A 13.2MM VICMO13.2 IMPLANTABLE COLLAMER LENS, -8.0 DIOPTER, INTO THE PATIENT'S RIGHT EYE (OD) ON (B)(6) 2020. REPORTEDLY, THE LENS WAS EXCHANGED ON (B)(6) 2020 WITH A SAME SIZE DIFFERENT MODEL LENS DUE TO REFRACTIVE SURPRISE. THE PROBLEM WAS RESOLVED. THE CAUSE OF THE EVENT IS REPORTED AS UNKNOWN. Manufacturer Narrative: H3 - DE…	OD		03/14/2021	2021	21
https://www.accessdata.fda.gov/scripts/cdrh/cfdocs/cfMAUDE/Detail.CFM?MDRFOI__ID=12171147&pc=MTA	2023826-2021-02585	2020-08-11 04:00:00	Injury	STAAR SURGICAL COMPANY	2021-07-15 04:00:00	MTA	IMPLANTABLE COLLAMER LENS (ICL)	Misfocusing	Blurred Vision	NA	Event Description: THE REPORTER INDICATED THAT A 12.6MM, VICMO12.6, -6.0 DIOPTER, IMPLANTABLE COLLAMER LENS WAS IMPLANTED INTO THE PATIENTS RIGHT EYE (OD) ON (B)(6) 2020. ON (B)(6) 2020 THE LENS WAS EXCHANGED FOR A DIFFERENT MODEL AND DIOPTER LENS DUE TO REFRACTIVE SURPRISE. THIS EXCHANGE RESOLVED THE PROBLEM. PATIENT RELATED FACTOR WAS REPORTED TO BE THE CAUSE OF THIS EVENT. Manufacturer Narrati…	OD	Physician	06/14/2021	2021	31	Female
https://www.accessdata.fda.gov/scripts/cdrh/cfdocs/cfMAUDE/Detail.CFM?MDRFOI__ID=12322376&pc=MTA	2023826-2021-03118	2020-08-21	Injury	STAAR SURGICAL COMPANY	2021-08-15	MTA	IMPLANTABLE COLLAMER LENS	Misfocusing	Blurred Vision	P030016	Event Description: THE REPORTER STATES A 13.2MM MICL13.2 IMPLANTABLE COLLAMER LENS -11.5 WAS IMPLANTED INTO THE PATIENT'S RIGHT (OD) EYE ON (B)(6) 2015. ON (B)(6) 2021 THE LENS WAS EXCHANGED WITH A SAME SIZE DIFFERENT DIOPTER LENS DUE TO REFRACTIVE CHANGE OVER TIME. THE PROBLEM IS RESOLVED. THE SURGEON REPORTS, "TRACE CELLS, GOOD VAULT AT 1-WEEK POSTOP" AFTER EXCHANGE. THE CAUSE OF THE EVENT IS R…	OD	Physician	07/20/2021	2021	29
https://www.accessdata.fda.gov/scripts/cdrh/cfdocs/cfMAUDE/Detail.CFM?MDRFOI__ID=12322379&pc=MTA	2023826-2021-03117	2020-08-21 04:00:00	Injury	STAAR SURGICAL COMPANY	2021-08-15 04:00:00	MTA	IMPLANTABLE COLLAMER LENS	Misfocusing	Blurred Vision	P030016	Event Description: THE REPORTER STATES A 13.2MM MICL13.2 IMPLANTABLE COLLAMER LENS -11.5 WAS IMPLANTED INTO THE PATIENT'S RIGHT (OD) EYE ON (B)(6) 2015. ON (B)(6) 2021 THE LENS WAS EXCHANGED WITH A SAME SIZE DIFFERENT DIOPTER LENS DUE TO REFRACTIVE CHANGE OVER TIME. THE PROBLEM IS RESOLVED. THE SURGEON REPORTS, "TRACE CELLS, GOOD VAULT AT 1-WEEK POSTOP" AFTER EXCHANGE. THE CAUSE OF THE EVENT IS R…	OD		07/19/2021	2021	29
https://www.accessdata.fda.gov/scripts/cdrh/cfdocs/cfMAUDE/Detail.CFM?MDRFOI__ID=10755799&pc=MTA	2023826-2020-02463	2020-09-07 04:00:00	Injury	STAAR SURGICAL COMPANY	2020-10-29 04:00:00	MTA	IMPLANTABLE COLLAMER LENS (ICL)	Misfocusing	Blurred Vision	N/A	Event Description: THE REPORTER INDICATED THAT A 13.2MM, VICM5_13.2, -06.00 DIOPTER, IMPLANTABLE COLLAMER LENS WAS IMPLANTED INTO THE PATIENT'S LEFT EYE (OS) ON (B)(6) 2020. ON (B)(6) 2020 THE LENS WAS REMOVED AND EXCHANGED WITH A LONGER LENGTH LENS DUE TO REFRACTIVE SURPRISE. THE PROBLEM WAS RESOLVED. CAUSE OF THE EVENT IS REPORTED AS UNKNOWN. Manufacturer Narrative: ADDITIONAL INFORMATION: H3- …	OS	Physician	10/06/2020	2020	40	Male
https://www.accessdata.fda.gov/scripts/cdrh/cfdocs/cfMAUDE/Detail.CFM?MDRFOI__ID=10938834&pc=MTA	2023826-2020-02844	2020-09-28 04:00:00	Injury	STAAR SUGICAL COMPANY	2020-12-03 05:00:00	MTA	IMPLANTABLE COLLAMER LENS (ICL)	Misfocusing	Blurred Vision	NA	Event Description: THE REPORTER INDICATED THAT A 12.6MM, VICM5_12.6, -11.50 DIOPTER, IMPLANTABLE COLLAMER LENS WAS IMPLANTED INTO THE PATIENTS LEFT EYE ON (B)(6) 2020. ON (B)(6) 2020 THE LENS WAS EXCHANGED FOR A DIFFERENT DIOPTER LENS DUE TO REFRACTIVE SURPRISE. THIS EXCHANGE RESOLVED THE PROBLEM. Manufacturer Narrative: H3 - DEVICE EVALUATION: LENS WAS RETURNED IN A VIAL IN LIQUID. VISUAL INSPEC…	OS		11/02/2020	2020	37
https://www.accessdata.fda.gov/scripts/cdrh/cfdocs/cfMAUDE/Detail.CFM?MDRFOI__ID=11788143&pc=MTA	2023826-2021-01393	2020-10-12 04:00:00	Malfunction	STAAR SURGICAL COMPANY	2021-05-06 04:00:00	MTA	IMPLANTABLE COLLAMER LENS (ICL)	Misfocusing	Blurred Vision	NA	Event Description: THE REPORTER INDICATED THAT A 12.6MM, VICMO12.6, -7.50 DIOPTER, IMPLANTABLE COLLAMER LENS WAS IMPLANTED INTO THE PATIENTS RIGHT EYE (OD) ON (B)(6) 2020. ON (B)(6) 2020 THE LENS WAS EXCHANGED FOR A DIFFERENT DIOPTER LENS DUE TO REFRACTIVE SURPRISE. THIS EXCHANGE RESOLVED THE PROBLEM. CAUSE OF THIS EVENT IS UNKNOWN. Manufacturer Narrative: H3: DEVICE EVALUATION: THE LENS WAS RETU…	OD	Physician	04/09/2021	2021	27	Female
https://www.accessdata.fda.gov/scripts/cdrh/cfdocs/cfMAUDE/Detail.CFM?MDRFOI__ID=11788188&pc=MTA	2023826-2021-01394	2020-10-12 04:00:00	Injury	STAAR SURGICAL COMPANY	2021-05-06 04:00:00	MTA	IMPLANTABLE COLLAMER LENS (ICL)	Misfocusing	Blurred Vision	NA	Event Description: THE REPORTER INDICATED THAT A 12.6MM, VICMO12.6, -7.50 DIOPTER, IMPLANTABLE COLLAMER LENS WAS IMPLANTED INTO THE PATIENTS LEFT EYE (OS) ON (B)(6) 2020. ON (B)(6) 2020 THE LENS WAS EXCHANGED FOR A DIFFERENT DIOPTER LENS DUE TO REFRACTIVE SURPRISE. THIS EXCHANGE RESOLVED THE PROBLEM. CAUSE OF THIS EVENT IS UNKNOWN. Manufacturer Narrative: H3: DEVICE EVALUATION: THE LENS WAS RETUR…	OS	Physician	04/09/2021	2021	27	Female
https://www.accessdata.fda.gov/scripts/cdrh/cfdocs/cfMAUDE/Detail.CFM?MDRFOI__ID=11536792&pc=MTA	2023826-2021-00734	2020-10-17 04:00:00	Injury	STAAR SURGICAL COMPANY	2021-03-21 04:00:00	MTA	IMPLANTABLE COLLAMER LENS (ICL)	Misfocusing	Blurred Vision	NA	Event Description: THE REPORTER INDICATED THAT A 13.2MM, VICMO13.2, -7.0 DIOPTER, IMPLANTABLE COLLAMER LENS WAS IMPLANTED INTO THE PATIENTS RIGHT EYE (OD) ON (B)(6) 2020. ON (B)(6) 2020 THE LENS WAS EXCHANGED FOR A DIFFERENT MODEL AND DIOPTER LENS DUE TO REFRACTIVE SURPRISE. THIS EXCHANGE RESOLVED THE PROBLEM. CAUSE OF THE EVENT WAS REPORTER AS UNKNOWN. Manufacturer Narrative: B5 - THE REPORTER I…	OD	Physician	02/19/2021	2021	31	Male
https://www.accessdata.fda.gov/scripts/cdrh/cfdocs/cfMAUDE/Detail.CFM?MDRFOI__ID=10937930&pc=MTA	2023826-2020-02779	2020-10-20 04:00:00	Injury	STAAR SURGICAL COMPANY	2020-12-03 05:00:00	MTA	IMPLANTABLE COLLAMER LENS (ICL)	Misfocusing	Blurred Vision	N/A	Event Description: THE REPORTER INDICATED THAT A 13.7MM, VICMO 13.7, -7.50 DIOPTER, IMPLANTABLE COLLAMER LENS WAS IMPLANTED INTO THE PATIENT'S RIGHT EYE (OD) ON APR/2015. REFRACTIVE SURPRISE WITH GLARE/HALOES WAS OBSERVED. THE LENS REMAINS IMPLANTED. IF ADDITIONAL INFORMATION IS RECEIVED, A SUPPLEMENTAL MEDWATCH REPORT WILL BE SUBMITTED. Manufacturer Narrative: ADDITIONAL INFORMATION: B5: THE REP…	OD		11/11/2020	2020	30
https://www.accessdata.fda.gov/scripts/cdrh/cfdocs/cfMAUDE/Detail.CFM?MDRFOI__ID=11563239&pc=MTA	2023826-2021-00762	2020-10-21 04:00:00	Injury	STAAR SURGICAL COMPANY	2021-03-24 04:00:00	MTA	IMPLANTABLE COLLAMER LENS (ICL)	Misfocusing	Blurred Vision	N/A	Event Description: THE REPORTER INDICATED THAT A 13.2MM, VICMO 13.2, -04.50 DIOPTER, IMPLANTABLE COLLAMER LENS WAS IMPLANTED INTO THE PATIENT'S RIGHT EYE (OD) ON (B)(6) 2020. THE LENS WAS REMOVED AND EXCHANGED FOR A SAME LENGTH LENS WITH A -5.5 DIOPTER TO RESOLVE THE PROBLEM. CAUSE OF THE EVENT IS REPORTED AS UNKNOWN. Manufacturer Narrative: ADDITIONAL INFORMATION: H3 - DEVICE EVALUATION: LENS WA…	OD		03/03/2021	2021	33
https://www.accessdata.fda.gov/scripts/cdrh/cfdocs/cfMAUDE/Detail.CFM?MDRFOI__ID=13317799&pc=MTA	2023826-2022-00205	2020-11-01 04:00:00	Injury	STAAR SURGICAL COMPANY	2022-01-21 05:00:00	MTA	IMPLANTABLE COLLAMER LENS	Misfocusing	Blurred Vision	NA	Event Description: THE REPORTER INDICATED THAT THE SURGEON IMPLANTED A 13.2MM VICMO13.2 IMPLANTABLE COLLAMER LENS, -14.5 DIOPTER INTO THE PATIENT'S LEFT EYE (OS) ON (B)(6) 2021. REPORTEDLY THE LENS WAS EXCHANGED ON (B)(6) 2021 WITH A SAME SIZE DIFFERENT DIOPTER LENS DUE TO REFRACTIVE SURPRISE. THE PROBLEM WAS RESOLVED. THE CAUSE OF THE EVENT IS REPORTED AS UNKNOWN.Event Description: THE REPORTER …	OS	Physician	12/31/2021	2021	31	Female
https://www.accessdata.fda.gov/scripts/cdrh/cfdocs/cfMAUDE/Detail.CFM?MDRFOI__ID=11710516&pc=MTA	2023826-2021-01107	2020-11-08 05:00:00	Injury	STAAR SURGICAL COMPANY	2021-04-22 04:00:00	MTA	IMPLANTABLE COLLAMER LENS (ICL)	Misfocusing	Blurred Vision	NA	Event Description: THE REPORTER INDICATED THAT A 13.2MM, VICMO13.2, -11.0 DIOPTER, IMPLANTABLE COLLAMER LENS WAS IMPLANTED INTO THE PATIENTS RIGHT EYE (OD) ON (B)(6) 2020. ON (B)(6) 2020 THE LENS WAS EXCHANGED FOR A DIFFERENT DIOPTER LENS DUE TO REFRACTIVE SURPRISE. THIS EXCHANGE RESOLVED THE PROBLEM. CAUSE OF THE EVENT WAS REPORTER AS UNKNOWN. Manufacturer Narrative: H3 - DEVICE EVALUATION: LENS…	OD		03/23/2021	2021	26
https://www.accessdata.fda.gov/scripts/cdrh/cfdocs/cfMAUDE/Detail.CFM?MDRFOI__ID=11416066&pc=MTA	2023826-2021-00564	2020-11-13 05:00:00	Injury	STAAR SURGICAL COMPANY	2021-03-04 05:00:00	MTA	IMPLANTABLE COLLAMER LENS (ICL)	Misfocusing	Blurred Vision		Event Description: THE REPORTER INDICATED THAT THE SURGEON IMPLANTED A IMPLANTABLE COLLAMER LENS INTO THE PATIENT'S RIGHT EYE (OD) ON (B)(6) 2020. AN "UNEXPECTED REFRACTIVE OUTCOME" AND A 25 DEGREES ROTATION WAS OBSERVED. LENS REMAINS IMPLANTED. ADDITIONAL INFORMATION HAS BEEN REQUESTED BUT NONE HAS BEEN FORTHCOMING. IF ADDITIONAL INFORMATION IS RECEIVED A SUPPLEMENTAL MEDWATCH REPORT WILL BE SUB…	OD		01/30/2021	2021	35
https://www.accessdata.fda.gov/scripts/cdrh/cfdocs/cfMAUDE/Detail.CFM?MDRFOI__ID=11416418&pc=MTA	2023826-2021-00513	2020-11-29 05:00:00	Injury	STAAR SURGICAL COMPANY	2021-03-04 05:00:00	MTA	IMPLANTABLE COLLAMER LENS (ICL)	Misfocusing	Blurred Vision	N/A	Event Description: THE REPORTER INDICATED THAT A 13.2MM, VICM5 12.6, -09.50 DIOPTER, IMPLANTABLE COLLAMER LENS WAS IMPLANTED INTO THE PATIENT'S RIGHT EYE (OD) ON (B)(6) 2020. ON (B)(6) 2021 THE LENS WAS EXCHANGED WITH A SAME SIZE, HIGHER POWER LENS DUE TO REFRACTIVE SURPRISE. THE PROBLEM WAS RESOLVED. CAUSE OF THE EVENT IS REPORTED AS UNKNOWN. PER THE REPORTER ON (B)(6) 2021, "THERE IS NO PROBLEM…	OD		02/14/2021	2021	24
https://www.accessdata.fda.gov/scripts/cdrh/cfdocs/cfMAUDE/Detail.CFM?MDRFOI__ID=12544735&pc=MTA	2023826-2021-03791	2020-12-04 05:00:00	Injury	STAAR SURGICAL COMPANY	2021-09-28 04:00:00	MTA	IMPLANTABLE COLLAMER LENS (ICL)	Misfocusing	Blurred Vision	NA	Event Description: THE REPORTER INDICATED THAT A 12.6MM, VICMO12.6, -2.00 DIOPTER, IMPLANTABLE COLLAMER LENS WAS IMPLANTED INTO THE PATIENTS LEFT EYE (OS) ON (B)(6) 2020. ON (B)(6) 2021 THE LENS WAS EXCHANGED WITH A DIFFERENT DIOPTER LENS DUE TO REFRACTIVE SURPRISE. THIS EXCHANGE RESOLVED THE PROBLEM. CAUSE OF EVENT WAS UNKNOWN. Manufacturer Narrative: H3 - DEVICE EVALUATION: THE LENS WAS RETURNE…	OS	Physician	08/30/2021	2021	32	Male
https://www.accessdata.fda.gov/scripts/cdrh/cfdocs/cfMAUDE/Detail.CFM?MDRFOI__ID=11135923&pc=MTA	2023826-2021-00059	2020-12-11 05:00:00	Injury	STAAR SURGICAL COMPANY	2021-01-07 05:00:00	MTA	IMPLANTABLE COLLAMER LENS (ICL)	Misfocusing	Blurred Vision	N/A	Event Description: THE REPORTER INDICATED THAT A 13.2MM, VICM5_13.2, -8.50, IMPLANTABLE COLLAMER LENS WAS IMPLANTED INTO THE PATIENT'S LEFT EYE (OS) ON (B)(6) 2020. ON (B)(6) 2020 THE LENS WAS EXCHANGED WITH A SAME SIZE DIFFERENT MODEL LENS AND THE PROBLEM WAS RESOLVED. Manufacturer Narrative: H6-INVESTIGATION TYPE 4110: LENS WORK ORDER SEARCH-NO SIMILAR COMPLAINT TYPE EVENTS REPORTED FOR UNITS W…	OS		12/15/2020	2020	44
https://www.accessdata.fda.gov/scripts/cdrh/cfdocs/cfMAUDE/Detail.CFM?MDRFOI__ID=11855179&pc=MTA	2023826-2021-01509	2020-12-12	Injury	STAAR SURGICAL COMPANY	2021-05-20	MTA	IMPLANTABLE COLLAMER LENS (ICL)	Misfocusing	Blurred Vision	N/A	Event Description: THE REPORTER INDICATED THAT A 12.1MM, VICMO 12.1, -04.50 DIOPTER, IMPLANTABLE COLLAMER LENS WAS IMPLANTED INTO THE PATIENT'S LEFT EYE (OS) ON (B)(6) 2020. ON (B)(6) 2021 THE LENS WAS EXCHANGED WITH A SAME SIZE , HIGHER POWER (SPHERE/CYLINDER/AXIS) LENS DUE TO REFRACTIVE SURPRISE. THE PROBLEM WAS RESOLVED. CAUSE OF THE EVENT IS REPORTED AS UNKNOWN. Manufacturer Narrative: DATE R…	OS	Physician	04/26/2021	2021	31
https://www.accessdata.fda.gov/scripts/cdrh/cfdocs/cfMAUDE/Detail.CFM?MDRFOI__ID=11366536&pc=MTA	2023826-2021-00479	2020-12-13 05:00:00	Injury	STAAR SURGICAL COMPANY	2021-02-23 05:00:00	MTA	IMPLANTABLE COLLAMER LENS	Misfocusing	Blurred Vision	NA	Event Description: THE REPORTER INDICATED THAT THE SURGEON IMPLANTED A 12.1MM VICMO12.1 IMPLANTABLE COLLAMER LENS, -16.5 DIOPTER, INTO THE PATIENT'S RIGHT EYE (OD) ON (B)(6) 2020. REPORTEDLY, THE LENS WAS EXCHANGED ON (B)(6) 2020 WITH A SAME SIZE, DIFFERENT DIOPTER LENS DUE TO REFRACTIVE SURPRISE. THE PROBLEM WAS RESOLVED. THE CAUSE OF THE EVENT IS REPORTED AS UNKNOWN. Manufacturer Narrative: H3 …	OD		01/29/2021	2021	40
https://www.accessdata.fda.gov/scripts/cdrh/cfdocs/cfMAUDE/Detail.CFM?MDRFOI__ID=13256327&pc=MTA	2023826-2022-00151	2020-12-15 05:00:00	Injury	STAAR SURGICAL COMPANY	2022-01-13 05:00:00	MTA	IMPLANTABLE COLLAMER LENS	Misfocusing	Blurred Vision	NA	Event Description: THE REPORTER INDICATED THAT THE SURGEON IMPLANTED A COLLAMER LENS, -13.5 DIOPTER INTO THE PATIENT'S LEFT EYE (OS) ON (B)(6) 2020. REPORTEDLY THE LENS WAS EXCHANGED ON (B)(6) 2020 WITH A SAME SIZE DIFFERENT DIOPTER LENS DUE TO REFRACTIVE SURPRISE. THE PROBLEM WAS RESOLVED. THE CAUSE OF THE EVENT IS REPORTED AS UNKNOWN. Manufacturer Narrative: PMA/510(K): THIS PRODUCT IS MANUFACT…	OS	Physician	12/23/2021	2021	37	Female
https://www.accessdata.fda.gov/scripts/cdrh/cfdocs/cfMAUDE/Detail.CFM?MDRFOI__ID=12178442&pc=MTA	2023826-2021-02711	2020-12-25 05:00:00	Injury	STAAR SURGICAL COMPANY	2021-07-15 04:00:00	MTA	IMPLANTABLE COLLAMER LENS	Misfocusing	Blurred Vision	NA	Event Description: THE REPORTER INDICATED THAT THE SURGEON IMPLANTED A 12.1MM VICM5_12.1 IMPLANTABLE COLLAMER LENS, -12.5 DIOPTER INTO THE PATIENT'S LEFT EYE (OS) ON (B)(6) 2020. REPORTEDLY, THE LENS WAS EXCHANGED ON (B)(6) 2021 WITH A SAME SIZE, DIFFERENT DIOPTER LENS DUE TO REFRACTIVE SURPRISE. THE PROBLEM WAS RESOLVED. THE CAUSE OF THE EVENT IS REPORTED AS UNKNOWN. Manufacturer Narrative: DEVI…	OS		06/22/2021	2021	34
https://www.accessdata.fda.gov/scripts/cdrh/cfdocs/cfMAUDE/Detail.CFM?MDRFOI__ID=12207945&pc=MTA	2023826-2021-02747	2021-01-01 05:00:00	Injury	STAAR SURGICAL COMPANY	2021-07-21 04:00:00	MTA	IMPLANTABLE COLLAMER LENS (ICL)	Misfocusing	Blurred Vision	NA	Event Description: THE REPORTER INDICATED THAT A 12.6MM, VICMO12.6, -4.00 DIOPTER, IMPLANTABLE COLLAMER LENS WAS IMPLANTED INTO THE PATIENTS LEFT EYE (OS) ON (B)(6) 2020. ON (B)(6) 2021 THE LENS WAS EXCHANGED FOR A DIFFERENT MODEL AND DIOPTER LENS. THIS EXCHANGE RESOLVED THE PROBLEM. CAUSE OF EVENT WAS UNKNOWN. Manufacturer Narrative: ADDITIONAL INFORMATION: H3-DEVICE EVALUATION: LENS RETURNED IN…	OS		06/21/2021	2021	31
https://www.accessdata.fda.gov/scripts/cdrh/cfdocs/cfMAUDE/Detail.CFM?MDRFOI__ID=11942684&pc=MTA	2023826-2021-01770	2021-01-08 05:00:00	Injury	STAAR SURGICAL COMPANY	2021-06-04 04:00:00	MTA	IMPLANTABLE COLLAMER LENS	Misfocusing	Blurred Vision	NA	Event Description: THE REPORTER INDICATED THAT THE SURGEON IMPLANTED A 12.6MM VICMO12.6 IMPLANTABLE COLLAMER LENS, -10.0 DIOPTER, INTO THE PATIENT'S LEFT EYE (OS) ON (B)(6) 2020. ON (B)(6) 2021 THE LENS WAS EXCHANGED WITH A SAME SIZE DIFFERENT DIOPTER LENS DUE TO REFRACTIVE SURPRISE. THE PROBLEM WAS RESOLVED. THE CAUSE OF THE EVENT IS REPORTED AS UNKNOWN. Manufacturer Narrative: H3: DEVICE EVALUA…	OS		05/11/2021	2021	25
https://www.accessdata.fda.gov/scripts/cdrh/cfdocs/cfMAUDE/Detail.CFM?MDRFOI__ID=11308762&pc=MTA	2023826-2021-00308	2021-01-14 05:00:00	Injury	STAAR SURGICAL COMPANY	2021-02-10 05:00:00	MTA	IMPLANTABLE COLLAMER LENS (ICL)	Misfocusing	Blurred Vision	N/A	Event Description: THE REPORTER INDICATED THAT A 12.6MM, VICM5 12.6, -06.50 DIOPTER, IMPLANTABLE COLLAMER LENS WAS IMPLANTED INTO THE PATIENT'S LEFT EYE (OS) ON (B)(6) 2020. REFRACTIVE SURPRISE WAS OBSERVED, THE LENS REMAINS IMPLANTED. CAUSE OF THE EVENT IS REPORTED AS UNKNOWN. ADDITIONAL INFORMATION HAS BEEN REQUESTED BUT NONE HAS BEEN FORTHCOMING. IF ADDITIONAL INFORMATION IS RECEIVED A SUPPLEM…	OS	Physician	01/14/2021	2021	28	Female
https://www.accessdata.fda.gov/scripts/cdrh/cfdocs/cfMAUDE/Detail.CFM?MDRFOI__ID=11343195&pc=MTA	2023826-2021-00398	2021-01-20 05:00:00	Injury	STAAR SURGICAL COMPANY	2021-02-18 05:00:00	MTA	IMPLANTABLE COLLAMER LENS (ICL)	Misfocusing	Blurred Vision	N/A	Event Description: THE REPORTER INDICATED THAT A 12.6MM, VICM5_12.6, -10.50 DIOPTER, IMPLANTABLE COLLAMER LENS WAS IMPLANTED INTO THE PATIENT'S RIGHT EYE (OD) ON (B)(6) 2020. REFRACTIVE CHANGE OVERTIME WAS OBSERVED, THE LENS REMAINS IMPLANTED. ADDITIONAL INFORMATION HAS BEEN REQUESTED BUT NONE HAS BEEN FORTHCOMING. IF ADDITIONAL INFORMATION IS RECEIVED A SUPPLEMENTAL MEDWATCH REPORT WILL BE SUBMI…	OD		01/20/2021	2021	32
https://www.accessdata.fda.gov/scripts/cdrh/cfdocs/cfMAUDE/Detail.CFM?MDRFOI__ID=11942674&pc=MTA	2023826-2021-01779	2021-02-01	Injury	STAAR SURGICAL COMPANY	2021-06-04	MTA	IMPLANTABLE COLLAMER LENS	Misfocusing	Blurred Vision	NA	Event Description: THE REPORTER INDICATED THAT THE SURGEON IMPLANTED A 12.6MM VICMO12.6 IMPLANTABLE COLLAMER LENS, -6.0 DIOPTER, INTO THE PATIENT'S RIGHT EYE (OD) ON (B)(6) 2020. REPORTEDLY, THE LENS WAS EXCHANGED ON (B)(6) 2021 WITH A LONGER LENS DUE TO LOW VAULT AND REFRACTIVE SURPRISE. THE PROBLEM WAS RESOLVED. THE CAUSE OF THE EVENT IS REPORTED AS UNKNOWN. Manufacturer Narrative: THIS PRODUCT…	OD	Physician	05/12/2021	2021	26
https://www.accessdata.fda.gov/scripts/cdrh/cfdocs/cfMAUDE/Detail.CFM?MDRFOI__ID=11400353&pc=MTA	2023826-2021-00514	2021-02-02 05:00:00	Injury	STAAR SURGICAL COMPANY	2021-03-02 05:00:00	MTA	IMPLANTABLE COLLAMER LENS	Misfocusing	Blurred Vision	NA	Event Description: THE REPORTER INDICATED THAT THE SURGEON IMPLANTED A 13.2MM VICM5_13.2 IMPLANTABLE COLLAMER LENS, -2.5 DIOPTER INTO THE PATIENT'S RIGHT EYE (OD) ON (B)(6) 2020. ON (B)(6) 2021 THE LENS WAS EXPLANTED DUE TO REFRACTIVE SURPRISE. ON THE SAME DATE IN A SEPARATE SURGERY, A SAME SIZE DIFFERENT DIOPTER LENS WAS IMPLANTED AND THE PROBLEM WAS RESOLVED. THE CAUSE OF THE EVENT IS REPORTED …	OD		02/03/2021	2021	25
https://www.accessdata.fda.gov/scripts/cdrh/cfdocs/cfMAUDE/Detail.CFM?MDRFOI__ID=11751223&pc=MTA	2023826-2021-01284	2021-02-08	Injury	STAAR SURGICAL COMPANY	2021-04-30	MTA	IMPLANTABLE COLLAMER LENS (ICL)	Misfocusing	Blurred Vision	NA	Event Description: THE REPORTER INDICATED THAT A 12.6MM, VICM5_12.6, -7.00 DIOPTER, IMPLANTABLE COLLAMER LENS WAS IMPLANTED INTO THE PATIENTS RIGHT EYE (OD) ON (B)(6) 2020. ON (B)(6) 2021 THE LENS WAS EXCHANGED FOR A DIFFERENT MODEL AND DIOPTER LENS. THIS EXCHANGE RESOLVED THE PROBLEM. Manufacturer Narrative: WEIGHT: UNK, ETHNICITY: UNK, RACE: UNK. THIS PRODUCT IS NOT MARKETED IN THE US. WORK ORD…	OD	Physician	03/31/2021	2021	26
https://www.accessdata.fda.gov/scripts/cdrh/cfdocs/cfMAUDE/Detail.CFM?MDRFOI__ID=12207967&pc=MTA	2023826-2021-02748	2021-03-01 05:00:00	Injury	STAAR SURGICAL COMPANY	2021-07-21 04:00:00	MTA	IMPLANTABLE COLLAMER LENS (ICL)	Misfocusing	Blurred Vision	NA	Event Description: THE REPORTER INDICATED THAT A 12.1MM, VICMO12.1, -10.00 DIOPTER, IMPLANTABLE COLLAMER LENS WAS IMPLANTED INTO THE PATIENTS RIGHT EYE (OD) ON (B)(6) 2020. ON (B)(6) 2021 THE LENS WAS EXCHANGED FOR A DIFFERENT MODEL AND DIOPTER LENS. THIS EXCHANGE RESOLVED THE PROBLEM. CAUSE OF EVENT WAS UNKNOWN. Manufacturer Narrative: ADDITIONAL INFORMATION: H3-DEVICE EVALUATION: LENS RETURNED …	OD		06/21/2021	2021	23
https://www.accessdata.fda.gov/scripts/cdrh/cfdocs/cfMAUDE/Detail.CFM?MDRFOI__ID=11620582&pc=MTA	2023826-2021-00867	2021-03-03 05:00:00	Injury	STAAR SURGICAL COMPANY	2021-04-06 04:00:00	MTA	IMPLANTABLE COLLAMER LENS	Misfocusing	Blurred Vision	NA	Event Description: THE REPORTER INDICATED THAT THE SURGEON IMPLANTED A 13.2MM VICMO13.2 IMPLANTABLE COLLAMER LENS, -6.5 DIOPTER, INTO THE PATIENT'S LEFT EYE (OS) ON (B)(6) 2021. REPORTEDLY, THE LENS WAS EXCHANGED ON (B)(6) 2021 WITH A SAME SIZE DIFFERENT DIOPTER LENS DUE TO REFRACTIVE SURPRISE. THE PROBLEM WAS RESOLVED. THE CAUSE OF THE EVENT IS REPORTED AS UNKNOWN. Manufacturer Narrative: ADDITI…	OS		03/11/2021	2021	37
https://www.accessdata.fda.gov/scripts/cdrh/cfdocs/cfMAUDE/Detail.CFM?MDRFOI__ID=12378621&pc=MTA	2023826-2021-03375	2021-03-03 05:00:00	Injury	STAAR SURGICAL COMPANY	2021-08-27 04:00:00	MTA	IMPLANTABLE COLLAMER LENS	Misfocusing	Blurred Vision	NA	Event Description: THE REPORTER INDICATED THAT THE SURGEON IMPLANTED A 13.2MM VICMO13.2 IMPLANTABLE COLLAMER LENS, -16.0 DIOPTER INTO THE PATIENT'S RIGHT EYE (OD) ON (B)(6) 2021. REPORTEDLY, THE LENS WAS EXCHANGED ON (B)(6) 2021 WITH A SAME SIZE DIFFERENT DIOPTER LENS DUE TO REFRACTIVE SURPRISE. THE PROBLEM WAS RESOLVED. THE CAUSE OF THE EVENT IS REPORTED AS UNKNOWN. Manufacturer Narrative: ADDIT…	OD	Physician	06/29/2021	2021	25	Female
https://www.accessdata.fda.gov/scripts/cdrh/cfdocs/cfMAUDE/Detail.CFM?MDRFOI__ID=12207976&pc=MTA	2023826-2021-02749	2021-03-05 05:00:00	Injury	STAAR SURGICAL COMPANY	2021-07-21 04:00:00	MTA	IMPLANTABLE COLLAMER LENS (ICL)	Misfocusing	Blurred Vision	NA	Event Description: THE REPORTER INDICATED THAT A 12.1MM, VICMO12.1, -10.50 DIOPTER, IMPLANTABLE COLLAMER LENS WAS IMPLANTED INTO THE PATIENTS LEFT EYE (OS) ON (B)(6) 2020. ON (B)(6) 2021 THE LENS WAS EXCHANGED FOR A DIFFERENT MODEL AND DIOPTER LENS. THIS EXCHANGE RESOLVED THE PROBLEM. CAUSE OF EVENT WAS UNKNOWN. Manufacturer Narrative: ADDITIONAL INFORMATION: H3-DEVICE EVALUATION: LENS RETURNED I…	OS		06/21/2021	2021	23
https://www.accessdata.fda.gov/scripts/cdrh/cfdocs/cfMAUDE/Detail.CFM?MDRFOI__ID=11683173&pc=MTA	2023826-2021-01074	2021-03-16 04:00:00	Injury	STAAR SURGICAL COMPANY	2021-04-17 04:00:00	MTA	IMPLANTABLE COLLAMER LENS (ICL)	Misfocusing	Blurred Vision	NA	Event Description: THE REPORTER INDICATED THAT A 13.7MM, VICMO13.7, -00.75 DIOPTER, IMPLANTABLE COLLAMER LENS WAS IMPLANTED INTO THE PATIENTS LEFT EYE (OS) ON (B)(6) 2016. REFRACTIVE CHANGE OVERTIME WAS OBSERVED. LENS REMAINS IMPLANTED. THE REPORTER STATED "PATIENT HAS TRIED TO GET AN ENHANCEMENT THERAPY ELSEWHERE AND HAS GOT A TRANS-PRK WIT -1.00 (DR. (B)(6)) THIS THERAPY HAD NO REFRACTIVE EFFEC…	OS	Physician	03/18/2021	2021	34	Female
https://www.accessdata.fda.gov/scripts/cdrh/cfdocs/cfMAUDE/Detail.CFM?MDRFOI__ID=11781991&pc=MTA	2023826-2021-01385	2021-03-19 04:00:00	Injury	STAAR SURGICAL COMPANY	2021-05-06 04:00:00	MTA	IMPLANTABLE COLLAMER LENS (ICL)	Misfocusing	Blurred Vision	NA	Event Description: THE REPORTER INDICATED THAT A 12.6MM, VICM5_12.6, -5.00 DIOPTER, IMPLANTABLE COLLAMER LENS WAS IMPLANTED INTO THE PATIENTS LEFT EYE (OS) ON (B)(6) 2020. ON (B)(6) 2021 THE LENS WAS EXCHANGED FOR A DIFFERENT DIOPTER LENS DUE TO REFRACTIVE SURPRISE. THIS EXCHANGE RESOLVED THE PROBLEM. CAUSE OF THIS EVENT IS UNKNOWN. Manufacturer Narrative: H3 - DEVICE EVALUATION: THE LENS WAS RET…	OS	Physician	04/06/2021	2021	24	Male
https://www.accessdata.fda.gov/scripts/cdrh/cfdocs/cfMAUDE/Detail.CFM?MDRFOI__ID=11782012&pc=MTA	2023826-2021-01386	2021-03-26 04:00:00	Injury	STAAR SURGICAL COMPANY	2021-05-06 04:00:00	MTA	IMPLANTABLE COLLAMER LENS (ICL)	Misfocusing	Blurred Vision	NA	Event Description: THE REPORTER INDICATED THAT A 12.6MM, VICM5_12.6, -4.00 DIOPTER, IMPLANTABLE COLLAMER LENS WAS IMPLANTED INTO THE PATIENTS LEFT EYE (OS) ON (B)(6) 2020. ON (B)(6) 2021 THE LENS WAS EXCHANGED FOR A MODEL AND DIFFERENT DIOPTER LENS DUE TO REFRACTIVE SURPRISE. THIS EXCHANGE RESOLVED THE PROBLEM. CAUSE OF THIS EVENT IS UNKNOWN. Manufacturer Narrative: H3: DEVICE EVALUATION: THE LEN…	OS	Physician	04/06/2021	2021	28	Male
https://www.accessdata.fda.gov/scripts/cdrh/cfdocs/cfMAUDE/Detail.CFM?MDRFOI__ID=11942685&pc=MTA	2023826-2021-01769	2021-04-15 04:00:00	Injury	STAAR SURGICAL COMPANY	2021-06-04 04:00:00	MTA	IMPLANTABLE COLLAMER LENS	Misfocusing	Blurred Vision	NA	Event Description: THE REPORTER INDICATED THAT THE SURGEON IMPLANTED A 12.6MM VICMO12.6 IMPLANTABLE COLLAMER LENS, -15.0 DIOPTER, INTO THE PATIENT'S RIGHT EYE (OD) ON (B)(6) 2021. REPORTEDLY, THE LENS WAS EXCHANGED ON (B)(6) 2021 WITH A SAME SIZE, DIFFERENT DIOPTER LENS DUE TO REFRACTIVE SURPRISE. THE PROBLEM WAS RESOLVED. THE CAUSE OF THE EVENT IS REPORTED AS UNKNOWN. Manufacturer Narrative: H3-…	OD		05/09/2021	2021	27
https://www.accessdata.fda.gov/scripts/cdrh/cfdocs/cfMAUDE/Detail.CFM?MDRFOI__ID=12457492&pc=MTA	2023826-2021-03552	2021-04-19 04:00:00	Injury	STAAR SURGICAL COMPANY	2021-09-10 04:00:00	MTA	IMPLANTABLE COLLAMER LENS	Misfocusing	Blurred Vision	NA	Event Description: THE REPORTER INDICATED THAT THE SURGEON IMPLANTED A 12.6MM VICMO12.6 IMPLANTABLE COLLAMER LENS, -8.0 DIOPTER INTO THE PATIENT'S RIGHT EYE (OD) ON (B)(6) 2021. REPORTEDLY, THE LENS WAS EXCHANGED ON (B)(6) 2021 WITH A SAME SIZE DIFFERENT DIOPTER LENS DUE TO REFRACTIVE SURPRISE. THE PROBLEM WAS RESOLVED. THE CAUSE OF THE EVENT IS REPORTED AS UNKNOWN. Manufacturer Narrative: H3 - D…	OD	Physician	08/16/2021	2021	26	Female
https://www.accessdata.fda.gov/scripts/cdrh/cfdocs/cfMAUDE/Detail.CFM?MDRFOI__ID=12208015&pc=MTA	2023826-2021-02759	2021-04-22 04:00:00	Injury	STAAR SURGICAL COMPANY	2021-07-21 04:00:00	MTA	IMPLANTABLE COLLAMER LENS (ICL)	Misfocusing	Blurred Vision	NA	Event Description: THE REPORTER INDICATED THAT A 13.2MM, VICMO13.2, -7.5 DIOPTER, IMPLANTABLE COLLAMER LENS WAS IMPLANTED INTO THE PATIENTS RIGHT EYE (OD) ON (B)(6) 2021. ON (B)(6) 2021 THE LENS WAS EXCHANGED FOR A DIFFERENT DIOPTER LENS. THIS EXCHANGE RESOLVED THE PROBLEM. CAUSE OF EVENT WAS UNKNOWN. Manufacturer Narrative: ADDITIONAL INFORMATION; H3-DEVICE EVALUATION: LENS RETURNED IN A MICRO-C…	OD		06/24/2021	2021	43
https://www.accessdata.fda.gov/scripts/cdrh/cfdocs/cfMAUDE/Detail.CFM?MDRFOI__ID=12524257&pc=MTA	2023826-2021-03720	2021-04-23 04:00:00	Injury	STAAR SURGICAL COMPANY	2021-09-24 04:00:00	MTA	IMPLANTABLE COLLAMER LENS (ICL)	Misfocusing	Blurred Vision	NA	Event Description: THE REPORTER INDICATED THAT A 13.2MM, VICMO13.2 -5.0 DIOPTER, IMPLANTABLE COLLAMER LENS WAS IMPLANTED INTO THE PATIENTS LEFT EYE (OS) ON (B)(6) 2021. ON (B)(6) 2021 THE LENS WAS EXCHANGED FOR A DIFFERENT MODEL AND DIOPTER LENS DUE TO REFRACTIVE SURPRISE. THIS EXCHANGE RESOLVED THE PROBLEM. CAUSE OF EVENT UNKNOWN. Manufacturer Narrative: H3: DEVICE EVALUATION:LENS WAS RETURNED I…	OS	Physician	08/26/2021	2021	32	Female
https://www.accessdata.fda.gov/scripts/cdrh/cfdocs/cfMAUDE/Detail.CFM?MDRFOI__ID=12524286&pc=MTA	2023826-2021-03719	2021-04-23 04:00:00	Injury	STAAR SURGICAL COMPANY	2021-09-24 04:00:00	MTA	IMPLANTABLE COLLAMER LENS (ICL)	Misfocusing	Blurred Vision	NA	Event Description: THE REPORTER INDICATED THAT A 13.2MM, VICMO13.2 -5.0 DIOPTER, IMPLANTABLE COLLAMER LENS WAS IMPLANTED INTO THE PATIENTS RIGHT EYE (OD) ON (B)(6) 2021. ON (B)(6) 2021 THE LENS WAS EXCHANGED FOR A DIFFERENT MODEL AND DIOPTER LENS DUE TO REFRACTIVE SURPRISE. THIS EXCHANGE RESOLVED THE PROBLEM. CAUSE OF EVENT UNKNOWN. Manufacturer Narrative: H3: DEVICE EVALUATION:LENS WAS RETURNED …	OD	Physician	08/26/2021	2021	32	Female
https://www.accessdata.fda.gov/scripts/cdrh/cfdocs/cfMAUDE/Detail.CFM?MDRFOI__ID=12072245&pc=MTA	2023826-2021-02086	2021-05-14 04:00:00	Injury	STAAR SURGICAL COMPANY	2021-06-25 04:00:00	MTA	IMPLANTABLE COLLAMER LENS	Misfocusing	Blurred Vision	NA	Event Description: THE REPORTER INDICATED THAT THE SURGEON IMPLANTED A 12.1MM VICM5_12.1 IMPLANTABLE COLLAMER LENS, -5.0 DIOPTER, INTO THE PATIENT'S LEFT EYE (OS) ON (B)(6) 2020. REPORTEDLY, THE LENS WAS EXCHANGED ON (B)(6) 2021 WITH A SAME SIZE, DIFFERENT MODEL LENS DUE TO REFRACTIVE SURPRISE. THE PROBLEM WAS RESOLVED. THE CAUSE OF THE EVENT IS REPORTED AS UNKNOWN. Manufacturer Narrative: ADDITI…	OS		06/02/2021	2021	43
https://www.accessdata.fda.gov/scripts/cdrh/cfdocs/cfMAUDE/Detail.CFM?MDRFOI__ID=12072278&pc=MTA	2023826-2021-02085	2021-05-14 04:00:00	Injury	STAAR SURGICAL COMPANY	2021-06-25 04:00:00	MTA	IMPLANTABLE COLLAMER LENS	Misfocusing	Blurred Vision	NA	Event Description: THE REPORTER INDICATED THAT THE SURGEON IMPLANTED A 12.1MM VICM5_12.1 IMPLANTABLE COLLAMER LENS, -4.0 DIOPTER, INTO THE PATIENT'S RIGHT EYE (OD) ON (B)(6) 2020. REPORTEDLY, THE LENS WAS EXCHANGED ON (B)(6) 2021 WITH A SAME SIZE, DIFFERENT MODEL LENS DUE TO REFRACTIVE SURPRISE. THE PROBLEM WAS RESOLVED. THE CAUSE OF THE EVENT IS REPORTED AS UNKNOWN. Manufacturer Narrative: ADDIT…	OD		06/02/2021	2021	43
https://www.accessdata.fda.gov/scripts/cdrh/cfdocs/cfMAUDE/Detail.CFM?MDRFOI__ID=12544805&pc=MTA	2023826-2021-03793	2021-05-16 04:00:00	Injury	STAAR SURGICAL COMPANY	2021-09-28 04:00:00	MTA	IMPLANTABLE COLLAMER LENS (ICL)	Misfocusing	Blurred Vision	NA	Event Description: THE REPORTER INDICATED THAT A 13.2MM, VICMO13.2, -4.50 DIOPTER, IMPLANTABLE COLLAMER LENS WAS IMPLANTED INTO THE PATIENTS LEFT EYE (OS) ON (B)(6) 2021. ON (B)(6) 2021 THE LENS WAS EXCHANGED WITH A DIFFERENT MODEL, LENGTH AND DIOPTER LENS DUE TO REFRACTIVE SURPRISE. THIS EXCHANGE RESOLVED THE PROBLEM. CAUSE OF EVENT WAS UNKNOWN. Manufacturer Narrative: H3 - DEVICE EVALUATION: TH…	OS	Physician	08/30/2021	2021	26	Female
https://www.accessdata.fda.gov/scripts/cdrh/cfdocs/cfMAUDE/Detail.CFM?MDRFOI__ID=12072479&pc=MTA	2023826-2021-02033	2021-05-18 04:00:00	Injury	STAAR SURGICAL COMPANY	2021-06-26 04:00:00	MTA	IMPLANTABLE COLLAMER LENS (ICL)	Misfocusing	Blurred Vision	NA	Event Description: THE REPORTER INDICATED THAT A 12.6MM, VICM5_12.6, -6.5 DIOPTER, IMPLANTABLE COLLAMER LENS WAS IMPLANTED INTO THE PATIENTS RIGHT EYE (OD) ON (B)(6) 2021. THE LENS WAS LATER EXPLANTED DUE TO VISUAL ACUITY NOT BEING AS EXPECTED AFTER SURGERY. CAUSE OF EVENT WAS UNKNOWN. IF ADDITIONAL INFORMATION IS RECEIVED A SUPPLEMENTAL MEDWATCH REPORT WILL BE SUBMITTED. Manufacturer Narrative: …	OD		05/27/2021	2021	28
https://www.accessdata.fda.gov/scripts/cdrh/cfdocs/cfMAUDE/Detail.CFM?MDRFOI__ID=11986341&pc=MTA	2023826-2021-01874	2021-05-21 04:00:00	Malfunction	STAAR SURGICAL COMPANY	2021-06-11 04:00:00	MTA	IMPLANTABLE COLLAMER LENS (ICL)	Misfocusing	Blurred Vision	N/A	Event Description: THE REPORTER INDICATED THAT THE SURGEON IMPLANTED A 13.2MM VICM5_13.2 IMPLANTABLE COLLAMER LENS, -4.0 DIOPTER INTO THE PATIENT'S RIGHT EYE (OD) ON (B)(6) 2021. THE SURGEON REPORTS BLURRED NIGHT VISION DUE TO LARGE PUPIL SIZE. REPORTEDLY, THE LENS REMAINS IMPLANTED. Manufacturer Narrative: H6: INVESTIGATION TYPE 4110: LENS WORK ORDER SEARCH. NO SIMILAR COMPLAINT TYPE EVENTS REPO…	OD		05/21/2021	2021	31
https://www.accessdata.fda.gov/scripts/cdrh/cfdocs/cfMAUDE/Detail.CFM?MDRFOI__ID=12791894&pc=MTA	2023826-2021-04319	2021-05-26 04:00:00	Injury	STAAR SURGICAL COMPANY	2021-11-10 05:00:00	MTA	IMPLANTABLE COLLAMER LENS (ICL)	Misfocusing	Blurred Vision	NA	Event Description: THE REPORTER INDICATED THAT A 12.6MM, VICM5_12.6, -9.50 DIOPTER, IMPLANTABLE COLLAMER LENS WAS IMPLANTED INTO THE PATIENTS LEFT EYE (OS) ON (B)(6) 2021. ON (B)(6) 2021 THE LENS WAS EXPLANTED DUE TO REFRACTIVE SURPRISE. A REPLACEMENT LENS OF DIFFERENT POWER WAS LATER IMPLANTED. IF ADDITIONAL INFORMATION IS RECEIVED A SUPPLEMENTAL MEDWATCH REPORT WILL BE SUBMITTED. Manufacturer N…	OS	Physician	10/11/2021	2021	53	Female
https://www.accessdata.fda.gov/scripts/cdrh/cfdocs/cfMAUDE/Detail.CFM?MDRFOI__ID=12257193&pc=MTA	2023826-2021-02977	2021-05-27	Injury	STAAR SURGICAL COMPANY	2021-07-31	MTA	IMPLANTABLE COLLAMER LENS (ICL)	Misfocusing	Blurred Vision	NA	Event Description: THE REPORTER INDICATED THE SURGEON IMPLANTED A 12.6MM VICMO12.6 IMPLANTABLE COLLAMER LENS, -05.50 DIOPTER, IN THE PATIENTS LEFT EYE (OS), ON (B)(6) 2021. THE LENS WAS EXPLANTED ON (B)(6) 2021 DUE TO THE PATIENT EXPERIENCED BLURRED VISION. THE SURGEON DID NOT IMPLANT ANOTHER ICL LENS. THE CAUSE OF THE EVENT WAS DUE TO PATIENT RELATED FACTOR. Manufacturer Narrative: THIS PRODUCT …	OS	Physician	07/01/2021	2021	38
https://www.accessdata.fda.gov/scripts/cdrh/cfdocs/cfMAUDE/Detail.CFM?MDRFOI__ID=12524316&pc=MTA	2023826-2021-03722	2021-05-28 04:00:00	Injury	STAAR SURGICAL COMPANY	2021-09-24 04:00:00	MTA	IMPLANTABLE COLLAMER LENS (ICL)	Misfocusing	Blurred Vision	NA	Event Description: THE REPORTER INDICATED THAT A 13.7MM, VICMO13.7 -10.0 DIOPTER, IMPLANTABLE COLLAMER LENS WAS IMPLANTED INTO THE PATIENTS LEFT EYE (OS) ON (B)(6) 2021. ON (B)(6) 2021 THE LENS WAS EXCHANGED FOR A DIFFERENT MODEL AND DIOPTER LENS DUE TO REFRACTIVE SURPRISE. THIS EXCHANGE RESOLVED THE PROBLEM. CAUSE OF EVENT UNKNOWN. Manufacturer Narrative: H3: DEVICE EVALUATION:LENS WAS RETURNED …	OS	Physician	08/25/2021	2021	30	Female
https://www.accessdata.fda.gov/scripts/cdrh/cfdocs/cfMAUDE/Detail.CFM?MDRFOI__ID=12170553&pc=MTA	2023826-2021-02698	2021-06-04 04:00:00	Injury	STAAR SURGICAL COMPANY	2021-07-14 04:00:00	MTA	IMPLANTABLE COLLAMER LENS (ICL)	Misfocusing	Blurred Vision		Event Description: THE REPORTER INDICATED THAT A 12.6MM VICMO12.6; -12.0 DIOPTER IMPLANTABLE COLLAMER LENS WAS IMPLANTED INTO THE PATIENT'S RIGHT EYE (OD) ON (B)(6) 2021. THE PATIENT EXPERIENCED REFRACTIVE SURPRISE. ON (B)(6) 2021 THE LENS WAS EXCHANGED WITH A SAME MODEL/LENGTH LENS BUT DIFFERENT DIOPTER AND THIS RESOLVED THE PROBLEM. CAUSE OF THE EVENT WAS REPORTED AS UNKNOWN. Manufacturer Narra…	OD		07/13/2021	2021	39
https://www.accessdata.fda.gov/scripts/cdrh/cfdocs/cfMAUDE/Detail.CFM?MDRFOI__ID=12222316&pc=MTA	2023826-2021-02809	2021-06-08 04:00:00	Injury	STAAR SURGICAL COMPANY	2021-07-23 04:00:00	MTA	IMPLANTABLE COLLAMER LENS	Misfocusing	Blurred Vision	NA	Event Description: THE REPORTER INDICATED THAT THE SURGEON IMPLANTED A 12.6MM VICMO12.6 IMPLANTABLE COLLAMER LENS, -16.5 DIOPTER INTO THE PATIENT'S RIGHT EYE (OD) ON (B)(6) 2021. REPORTEDLY, THE LENS WAS EXCHANGED ON (B)(6) 2021 WITH A SAME SIZE DIFFERENT DIOPTER LENS DUE TO REFRACTIVE SURPRISE. THE PROBLEM WAS RESOLVED. THE CAUSE OF THE EVENT IS REPORTED AS UNKNOWN. Manufacturer Narrative: ADDIT…	OD		06/28/2021	2021	38
https://www.accessdata.fda.gov/scripts/cdrh/cfdocs/cfMAUDE/Detail.CFM?MDRFOI__ID=12872779&pc=MTA	2023826-2021-04511	2021-06-12 04:00:00	Malfunction	STAAR SURGICAL COMPANY	2021-11-24 05:00:00	MTA	IMPLANTABLE COLLAMER LENS (ICL)	Misfocusing	Blurred Vision	NA	Event Description: THE REPORTER INDICATED THAT A 13.2MM, VICMO_13.2, -9.00 DIOPTER, IMPLANTABLE COLLAMER LENS WAS IMPLANTED INTO THE PATIENTS RIGHT EYE (OD) ON (B)(6) 2021. REFRACTIVE SURPRISE WAS OBSERVED, LENS REMAINS IMPLANTED. IN THE REPORTERS OPINION THE CAUSE OF THIS EVENT WAS "OTHER", FOR CAUSE DETAILS THE REPORTER STATED " WRONG REFRACTION BY OPTOMETRIST." IT WAS REPORTED THAT THERE WAS A…	OD	Physician	10/25/2021	2021	35	Male
https://www.accessdata.fda.gov/scripts/cdrh/cfdocs/cfMAUDE/Detail.CFM?MDRFOI__ID=12178441&pc=MTA	2023826-2021-02712	2021-06-15 04:00:00	Injury	STAAR SURGICAL COMPANY	2021-07-15 04:00:00	MTA	IMPLANTABLE COLLAMER LENS	Misfocusing	Blurred Vision	NA	Event Description: THE REPORTER INDICATED THAT THE SURGEON IMPLANTED A 12.6MM VICM5_12.6 IMPLANTABLE COLLAMER LENS, -8.0 DIOPTER INTO THE PATIENT'S RIGHT EYE (OD) ON (B)(6) 2021. REPORTEDLY, THE LENS WAS EXCHANGED ON (B)(6) 2021 WITH A SAME SIZE, DIFFERENT DIOPTER LENS DUE TO REFRACTIVE SURPRISE. THE PROBLEM WAS RESOLVED. THE CAUSE OF THE EVENT IS REPORTED AS UNKNOWN. Manufacturer Narrative: H3 -…	OD		06/22/2021	2021	32
https://www.accessdata.fda.gov/scripts/cdrh/cfdocs/cfMAUDE/Detail.CFM?MDRFOI__ID=12644985&pc=MTA	2023826-2021-04019	2021-06-16 04:00:00	Injury	STAAR SURGICAL COMPANY	2021-10-18 04:00:00	MTA	IMPLANTABLE COLLAMER LENS (ICL)	Misfocusing	Blurred Vision	NA	Event Description: THE REPORTER INDICATED THAT A 12.6MM, VICM6_12.6,-8.50 DIOPTER, IMPLANTABLE COLLAMER LENS WAS IMPLANTED INTO THE PATIENTS RIGHT EYE (OD) ON (B)(6) 2021. REFRACTIVE SURPRISE WAS REPORTED, LENS REMAINS IMPLANTED. FOR PATIENTS CURRENT CONDITION "FAR SIGHT NOT GOOD" WAS REPORTED. IN THE REPORTERS OPINION THE DEVICE WAS THE CAUSE OF THIS EVENT, FOR CAUSE DETAILS THE REPORTED STATED …	OD	Physician	09/17/2021	2021	46	Female
https://www.accessdata.fda.gov/scripts/cdrh/cfdocs/cfMAUDE/Detail.CFM?MDRFOI__ID=12378568&pc=MTA	2023826-2021-03363	2021-06-17 04:00:00	Injury	STAAR SURGICAL COMPANY	2021-08-27 04:00:00	MTA	IMPLANTABLE COLLAMER LENS	Misfocusing	Blurred Vision	NA	Event Description: THE REPORTER INDICATED THAT THE SURGEON IMPLANTED A 12.6MM VICMO12.6 IMPLANTABLE COLLAMER LENS, -9.5 DIOPTER, INTO THE PATIENT'S LEFT EYE (OS) ON (B)(6) 2021. ON (B)(6) 2021 THE LENS WAS EXCHANGED WITH A SAME SIZE DIFFERENT DIOPTER LENS-BOTH REFRACTIVE CHANGE OVER TIME AND REFRACTIVE SURPRISE ARE REPORTED. THE PROBLEM WAS RESOLVED. THE CAUSE OF THE EVENT IS REPORTED AS UNKNOWN.…	OS	Physician	08/01/2021	2021	44	Female
https://www.accessdata.fda.gov/scripts/cdrh/cfdocs/cfMAUDE/Detail.CFM?MDRFOI__ID=12222324&pc=MTA	2023826-2021-02814	2021-06-29	Malfunction	STAAR SURGICAL COMPANY	2021-07-23	MTA	IMPLANTABLE COLLAMER LENS (ICL)	Misfocusing	Blurred Vision	N/A	Event Description: THE REPORTER INDICATED THE SURGEON IMPLANTED A 12.6MM VICM5_12.6 IMPLANTABLE COLLAMER LENS, -8.5 DIOPTER INTO THE PATIENT'S LEFT EYE (OS) ON (B)(6) 2021. THE SURGEON REPORTS REFRACTIVE SURPRISE. Manufacturer Narrative: WEIGHT, ETHNICITY, RACE-UNK. PMA/510(K): THIS PRODUCT IS MANUFACTURED IN THE U.S. BUT NOT MARKETED IN THE U.S. (B)(4).	OS	Physician	06/29/2021	2021	34
https://www.accessdata.fda.gov/scripts/cdrh/cfdocs/cfMAUDE/Detail.CFM?MDRFOI__ID=12725063&pc=MTA	2023826-2021-04166	2021-07-25 04:00:00	Injury	STAAR SURGICAL COMPANY	2021-10-30 04:00:00	MTA	IMPLANTABLE COLLAMER LENS (ICL)	Misfocusing	Blurred Vision	NA	Event Description: THE REPORTER INDICATED THAT A 12.1MM, VICMO12.1, -8.5 DIOPTER, IMPLANTABLE COLLAMER LENS WAS IMPLANTED INTO THE PATIENTS LEFT EYE (OS) ON (B)(6) 2021. ON (B)(6) 2021 THE LENS WAS EXCHANGED FOR A DIFFERENT MODEL AND POWER LENS DUE TO REFRACTIVE SURPRISE. THIS EXCHANGE RESOLVED THE PROBLEM. CAUSE OF EVENT WAS UNKNOWN. Manufacturer Narrative: H3- DEVICE EVALUATION: THE LENS WAS RE…	OS	Physician	09/29/2021	2021	24	Male
https://www.accessdata.fda.gov/scripts/cdrh/cfdocs/cfMAUDE/Detail.CFM?MDRFOI__ID=13082453&pc=MTA	2023826-2021-04969	2021-08-01 04:00:00	Injury	STAAR SURGICAL COMPANY	2021-12-23 05:00:00	MTA	IMPLANTABLE COLLAMER LENS	Misfocusing	Blurred Vision	NA	Event Description: THE REPORTER INDICATED THAT THE SURGEON IMPLANTED A 12.1MM VICM5_12.1 IMPLANTABLE COLLAMER LENS, -12.5 DIOPTER INTO THE PATIENT'S LEFT EYE (OS) ON (B)(6) 2021. REPORTEDLY, THE LENS WAS EXCHANGED ON (B)(6) 2021 WITH A LONGER LENGTH, DIFFERENT SIZE LENS DUE TO REFRACTIVE SURPRISE. THE PROBLEM WAS RESOLVED. THE CAUSE OF THE EVENT IS REPORTED AS UNKNOWN. Manufacturer Narrative: PT …	OS	Physician	11/30/2021	2021	41	Male
https://www.accessdata.fda.gov/scripts/cdrh/cfdocs/cfMAUDE/Detail.CFM?MDRFOI__ID=12725238&pc=MTA	2023826-2021-04178	2021-08-18 04:00:00	Injury	STAAR SURGICAL COMPANY	2021-10-30 04:00:00	MTA	IMPLANTABLE COLLAMER LENS (ICL)	Misfocusing	Blurred Vision	NA	Event Description: THE REPORTER INDICATED THAT A 13.2MM, VICM5_13.2, -10.00 DIOPTER IMPLANTABLE COLLAMER LENS WAS IMPLANTED INTO THE PATIENTS LEFT EYE (OS) ON (B)(6) 2021. ON (B)(6) 2021 THE LENS WAS EXCHANGED FOR A DIFFERENT POWER LENS DUE TO REFRACTIVE SURPRISE. THIS EXCHANGE RESOLVED THE PROBLEM. CAUSE OF EVENT WAS UNKNOWN. Manufacturer Narrative: H3- DEVICE EVALUATION: THE LENS WAS RETURNED I…	OS	Physician	09/08/2021	2021	41	Male
https://www.accessdata.fda.gov/scripts/cdrh/cfdocs/cfMAUDE/Detail.CFM?MDRFOI__ID=12566510&pc=MTA	2023826-2021-03842	2021-08-27	Injury	STAAR SURGICAL COMPANY	2021-10-03	MTA	IMPLANTABLE COLLAMER LENS (ICL)	Misfocusing	Blurred Vision	NA	Event Description: THE REPORTER INDICATED THAT A 12.6MM, VICM5_12.6, -13.00 DIOPTER, IMPLANTABLE COLLAMER LENS WAS IMPLANTED INTO THE PATIENTS LEFT EYE (OS) ON (B)(6) 2021. ON (B)(6) 2021 THE LENS WAS EXCHANGED WITH A DIFFERENT MODEL AND POWER LENS DUE TO REFRACTIVE SURPRISE. THIS EXCHANGE RESOLVED THE PROBLEM. CAUSE OF EVENT WAS UNKNOWN. Manufacturer Narrative: WEIGHT: UNK, ETHNICITY: UNK, RACE:…	OS	Physician	09/02/2021	2021	51
https://www.accessdata.fda.gov/scripts/cdrh/cfdocs/cfMAUDE/Detail.CFM?MDRFOI__ID=12523480&pc=MTA	2023826-2021-03690	2021-09-01 04:00:00	Malfunction	STAAR SURGICAL COMPANY	2021-09-23 04:00:00	MTA	IMPLANTABLE COLLAMER LENS	Misfocusing	Blurred Vision	P030016	Event Description: THE REPORTER STATES A 12.6MM MICL12.6 IMPLANTABLE COLLAMER LENS -13.5 DIOPTER WAS IMPLANTED INTO THE PATIENT'S LEFT (OS) EYE ON (B)(6) 2021. THE SURGEON REPORTS REFRACTIVE ERROR. Manufacturer Narrative: B5-UPDATED INFORMATION: ON (B)(6) 2021 THE LENS WAS EXPLANTED AND THEN REPLACED WITH A SAME SIZE DIFFERENT DIOPTER LENS DUE TO REFRACTIVE SURPRISE AND BLURRED VISION. THE CAUSE …	OS	Physician	09/02/2021	2021	33	Female
https://www.accessdata.fda.gov/scripts/cdrh/cfdocs/cfMAUDE/Detail.CFM?MDRFOI__ID=12725195&pc=MTA	2023826-2021-04172	2021-09-17 04:00:00	Injury	STAAR SURGICAL COMPANY	2021-10-30 04:00:00	MTA	IMPLANTABLE COLLAMER LENS (ICL)	Misfocusing	Blurred Vision	NA	Event Description: THE REPORTER INDICATED THAT A 12.1MM, VICMO12.1, -14.50 DIOPTER IMPLANTABLE COLLAMER LENS WAS IMPLANTED INTO THE PATIENTS LEFT EYE (OS) ON (B)(6) 2021. ON (B)(6) 2021 THE LENS WAS EXCHANGED FOR A DIFFERENT LENGTH AND POWER LENS DUE TO REFRACTIVE SURPRISE. THIS EXCHANGE RESOLVED THE PROBLEM. CAUSE OF EVENT WAS UNKNOWN. Manufacturer Narrative: H3- DEVICE EVALUATION: THE LENS WAS …	OS	Physician	09/30/2021	2021	32	Female
https://www.accessdata.fda.gov/scripts/cdrh/cfdocs/cfMAUDE/Detail.CFM?MDRFOI__ID=12909815&pc=MTA	2023826-2021-04616	2021-09-21 04:00:00	Injury	STAAR SURGICAL COMPANY	2021-12-01 05:00:00	MTA	IMPLANTABLE COLLAMER LENS (ICL)	Misfocusing	Blurred Vision		Event Description: THE REPORTER INDICATED THAT THE SURGEON IMPLANTED A 13.2MM VICMO13.2; -3.5 DIOPTER IMPLANTABLE COLLAMER LENS INTO THE PATIENT'S LEFT EYE (OS) ON (B)(6) 2021. ON (B)(6) 2021 THE LENS WAS EXCHANGED WITH A SAME LENGTH BUT DIFFERENT MODEL AND POWER LENS DUE TO REFRACTIVE SURPRISE. THIS RESOLVED THE PROBLEM. THE CAUSE OF THE EVENT WAS REPORTED AS UNKNOWN. Manufacturer Narrative: H3 …	OS	Physician	11/28/2021	2021	32	Male
https://www.accessdata.fda.gov/scripts/cdrh/cfdocs/cfMAUDE/Detail.CFM?MDRFOI__ID=12840513&pc=MTA	2023826-2021-04393	2021-09-25 04:00:00	Injury	STAAR SURGICAL COMPANY	2021-11-18 05:00:00	MTA	IMPLANTABLE COLLAMER LENS	Misfocusing	Blurred Vision	NA	Event Description: THE REPORTER INDICATED THAT THE SURGEON IMPLANTED A 13.2MM VICMO13.2 IMPLANTABLE COLLAMER LENS, -3.5 DIOPTER INTO THE PATIENT'S RIGHT EYE (OD) ON (B)(6) 2021. REPORTEDLY, THE LENS WAS EXCHANGED ON (B)(6) 2021 WITH A SAME SIZE DIFFERENT DIOPTER LENS DUE TO REFRACTIVE SURPRISE. THE PROBLEM WAS RESOLVED. THE CAUSE OF THE EVENT IS REPORTED AS UNKNOWN. Manufacturer Narrative: PT INF…	OD	Physician	11/01/2021	2021	28	Female
https://www.accessdata.fda.gov/scripts/cdrh/cfdocs/cfMAUDE/Detail.CFM?MDRFOI__ID=14246071&pc=MTA	2023826-2022-01311	2021-09-26 04:00:00	Injury	STAAR SURGICAL COMPANY	2022-04-28 04:00:00	MTA	IMPLANTABLE COLLAMER LENS (ICL)	Misfocusing	Blurred Vision	NA	Event Description: THE REPORTER INDICATED THAT A 12.1MM VICM5_12.1 IMPLANTABLE COLLAMER LENS OF -6.0 DIOPTER WAS IMPLANTED INTO THE PATIENT'S RIGHT EYE (OD) ON (B)(6) 2021. ON (B)(6) 2022 THE LENS WAS EXCHANGED WITH A DIFFERENT POWER LENS DUE TO REFRACTIVE SURPRISE. THE EXCHANGE RESOLVED THE PROBLEM. CAUSE IS REPORTED AS UNKNOWN. Manufacturer Narrative: WEIGHT-RACE: UNK. PMA/510(K): THIS PRODUCT …	OD	Physician	03/29/2022	2022	30	Female
https://www.accessdata.fda.gov/scripts/cdrh/cfdocs/cfMAUDE/Detail.CFM?MDRFOI__ID=14246554&pc=MTA	2023826-2022-01312	2021-09-26 04:00:00	Injury	STAAR SURGICAL COMPANY	2022-04-28 04:00:00	MTA	IMPLANTABLE COLLAMER LENS (ICL)	Misfocusing	Blurred Vision	NA	Event Description: THE REPORTER INDICATED THAT A 12.1MM VICM5_12.1 IMPLANTABLE COLLAMER LENS OF -6.0 DIOPTER WAS IMPLANTED INTO THE PATIENT'S LEFT EYE (OS) ON (B)(6) 2021. ON (B)(6) 2022 THE LENS WAS EXCHANGED WITH A DIFFERENT POWER LENS DUE TO REFRACTIVE SURPRISE. THE EXCHANGE RESOLVED THE PROBLEM. CAUSE IS REPORTED AS UNKNOWN. Manufacturer Narrative: H3: DEVICE EVALUATION: LENS WAS RETURNED IN …	OS	Physician	03/29/2022	2022	30	Female
https://www.accessdata.fda.gov/scripts/cdrh/cfdocs/cfMAUDE/Detail.CFM?MDRFOI__ID=14659120&pc=MTA	2023826-2022-01745	2021-10-09 04:00:00	Injury	STAAR SURGICAL COMPANY	2022-06-10 04:00:00	MTA	IMPLANTABLE COLLAMER LENS (ICL)	Misfocusing	Blurred Vision	P030016	Event Description: THE REPORTER INDICATED THAT A 12.1MM VICM5_12.1 IMPLANTABLE COLLAMER LENS OF -4.5 DIOPTER WAS IMPLANTED INTO THE PATIENT'S RIGHT EYE (OD) ON (B)(6) 2021. ON (B)(6) 2022 THE LENS WAS EXCHANGED WITH AN IDENTICAL LENS OF DIFFERENT DIOPTER DUE TO REFRACTIVE SURPRISE. THE EXCHANGE RESOLVED THE PROBLEM. Manufacturer Narrative: H3 DEVICE EVALUATION: THE LENS WAS RETURNED IN LIQUID IN …	OD	Physician	05/12/2022	2022	35	Female
https://www.accessdata.fda.gov/scripts/cdrh/cfdocs/cfMAUDE/Detail.CFM?MDRFOI__ID=13146229&pc=MTA	2023826-2022-00053	2021-10-12 04:00:00	Injury	STAAR SURGICAL COMPANY	2022-01-03 05:00:00	MTA	IMPLANTABLE COLLAMER LENS (ICL)	Misfocusing	Blurred Vision		Event Description: THE REPORTER INDICATED THAT THE SURGEON IMPLANTED A 12.6MM VICM5_12.6; -4.0 DIOPTER IMPLANTABLE COLLAMER LENS INTO THE PATIENT'S LEFT EYE (OS) ON (B)(6) 2021. THE PATIENT EXPERIENCE REFRACTIVE SURPRISE. ON (B)(6) 2021, THE LENS WAS EXCHANGED WITH A SAME MODEL/LENGTH BUT DIFFERENT DIOPTER LENS AND THIS RESOLVED THE PROBLEM. THE CAUSE OF THE EVENT WAS REPORTED AS "OTHER, REFRACTI…	OS	Physician	12/27/2021	2021	49	Female
https://www.accessdata.fda.gov/scripts/cdrh/cfdocs/cfMAUDE/Detail.CFM?MDRFOI__ID=13911555&pc=MTA	2023826-2022-00961	2021-10-12 04:00:00	Injury	STAAR SURGICAL COMPANY	2022-03-25 04:00:00	MTA	IMPLANTABLE COLLAMER LENS	Misfocusing	Blurred Vision	NA	Event Description: THE REPORTER INDICATED THAT THE SURGEON IMPLANTED A 12.1MM VICMO12.1 IMPLANTABLE COLLAMER LENS -15.0 DIOPTER INTO THE PATIENT'S LEFT EYE (OS) ON (B)(6) 2021. ON (B)(6) 2021 WITH A SAME SIZE DIFFERENT DIOPTER LENS DUE TO REFRACTIVE SURPRISE. THE PROBLEM WAS RESOLVED. THE CAUSE OF THE EVENT IS REPORTED AS UNKNOWN. Manufacturer Narrative: WEIGHT, ETHNICITY, RACE-UNK. PMA/510(K): T…	OS	Physician	03/01/2022	2022	31	Female
https://www.accessdata.fda.gov/scripts/cdrh/cfdocs/cfMAUDE/Detail.CFM?MDRFOI__ID=13182540&pc=MTA	2023826-2022-00029	2021-10-25 04:00:00	Injury	STAAR SURGICAL COMPANY	2022-01-06 05:00:00	MTA	IMPLANTABLE COLLAMER LENS	Misfocusing	Blurred Vision	NA	Event Description: THE REPORTER INDICATED THAT THE SURGEON IMPLANTED A 13.2MM VICMO13.2 IMPLANTABLE COLLAMER LENS, -16.5 DIOPTER INTO THE PATIENT'S RIGHT EYE (OD) ON (B)(6) 2021. REPORTEDLY, THE LENS WAS EXCHANGED ON (B)(6) 2021 WITH A SAME SIZE DIFFERENT DIOPTER LENS DUE TO REFRACTIVE SURPRISE. THE PROBLEM WAS RESOLVED. THE CAUSE OF THE EVENT IS REPORTED AS UNKNOWN. Manufacturer Narrative: WEIGH…	OD	Physician	12/15/2021	2021	38	Female
https://www.accessdata.fda.gov/scripts/cdrh/cfdocs/cfMAUDE/Detail.CFM?MDRFOI__ID=13182541&pc=MTA	2023826-2022-00030	2021-10-25 04:00:00	Injury	STAAR SURGICAL COMPANY	2022-01-06 05:00:00	MTA	IMPLANTABLE COLLAMER LENS	Misfocusing	Blurred Vision	NA	Event Description: THE REPORTER INDICATED THAT THE SURGEON IMPLANTED A 13.2MM VICMO13.2 IMPLANTABLE COLLAMER LENS, -16.0 DIOPTER INTO THE PATIENT'S LEFT EYE (OS) ON (B)(6) 2021. REPORTEDLY, THE LENS WAS EXCHANGED ON (B)(6) 2021 WITH A SAME SIZE DIFFERENT MODEL LENS DUE TO REFRACTIVE SURPRISE. THE PROBLEM WAS RESOLVED. THE CAUSE OF THE EVENT IS REPORTED AS UNKNOWN. REPORTEDLY THE LENS WAS REPLACED…	OS	Physician	12/15/2021	2021	38	Female
https://www.accessdata.fda.gov/scripts/cdrh/cfdocs/cfMAUDE/Detail.CFM?MDRFOI__ID=13983927&pc=MTA	2023826-2022-01048	2021-10-27 04:00:00	Malfunction	STAAR SURGICAL COMPANY	2022-04-01 04:00:00	MTA	IMPLANTABLE COLLAMER LENS (ICL)	Misfocusing	Blurred Vision	NA	Event Description: THE REPORTER INDICATED THAT A 12.6MM VICM5_12.6 IMPLANTABLE COLLAMER LENS OF -2.75 DIOPTER WAS IMPLANTED INTO THE PATIENT'S LEFT EYE (OS) ON (B)(6) 2021. THE PATIENT EXPERIENCED REFRACTIVE SURPRISE, LENS REMAINS IMPLANTED. IT WAS REPORTED THAT THE PATIENT IS WEARING GLASSES. IN THE REPORTERS OPINION THE CAUSE OF THIS EVENT IS THE DEVICE. IF ADDITIONAL INFORMATION IS RECEIVED A …	OS	Physician	03/08/2022	2022	37	Female
https://www.accessdata.fda.gov/scripts/cdrh/cfdocs/cfMAUDE/Detail.CFM?MDRFOI__ID=12973349&pc=MTA	2023826-2021-04699	2021-11-08 05:00:00	Injury	STAAR SURGICAL COMPANY	2021-12-09 05:00:00	MTA	IMPLANTABLE COLLAMER LENS (ICL)	Misfocusing	Blurred Vision	N/A	Event Description: THE REPORTER INDICATED THE SURGEON IMPLANTED A 12.6MM VICM5_12.6 IMPLANTABLE COLLAMER LENS, -6.5 DIOPTER INTO THE PATIENT'S LEFT EYE (OS) ON (B)(6) 2021. THE SURGEON REPORTS REFRACTIVE SURPRISE. THE CAUSE OF THE EVENT IS REPORTED AS OTHER: "ASTIGMATISM AND KERATOMETRY FROM THE START." THE REPORTER STATES THAT POSSIBLY THE SURGEON UNDERESTIMATED THE ASTIGMATISM-KERATOMETRY GIVES…	OS	Physician	11/10/2021	2021	33	Female
https://www.accessdata.fda.gov/scripts/cdrh/cfdocs/cfMAUDE/Detail.CFM?MDRFOI__ID=13459224&pc=MTA	2023826-2022-00389	2021-11-19 05:00:00	Injury	STAAR SURGICAL COMPANY	2022-02-04 05:00:00	MTA	IMPLANTABLE COLLAMER LENS (ICL)	Misfocusing	Blurred Vision	N/A	Event Description: THE REPORTER INDICATED THE SURGEON IMPLANTED A 12.6MM VICMO12.6 IMPLANTABLE COLLAMER LENS, DIOPTER -9.0 INTO THE PATIENT'S LEFT EYE (OS) ON (B)(6) 2021. ON (B)(6) 2021 THE LENS WAS EXCHANGED WITH A SAME SIZE DIFFERENT MODEL LENS DUE TO BLURRED VISION. THE CAUSE OF THE EVENT IS REPORTED AS UNKNOWN. SEE MFR REP# 2023826-2022-00392 FOR REPLACEMENT LENS. Manufacturer Narrative: WEI…	OS	Physician	01/12/2022	2022	31	Female
https://www.accessdata.fda.gov/scripts/cdrh/cfdocs/cfMAUDE/Detail.CFM?MDRFOI__ID=13317681&pc=MTA	2023826-2022-00204	2021-11-24 05:00:00	Injury	STAAR SURGICAL COMPANY	2022-01-21 05:00:00	MTA	IMPLANTABLE COLLAMER LENS	Misfocusing	Blurred Vision	NA	Event Description: THE REPORTER INDICATED THAT THE SURGEON IMPLANTED A 12.6MM VICMO12.6 IMPLANTABLE COLLAMER LENS -14.0 DIOPTER INTO THE PATIENT'S RIGHT EYE (OD) ON (B)(6) 2021. REPORTEDLY, THE LENS WAS EXCHANGED ON (B)(6) 2021 WITH A SAME SIZE DIFFERENT DIOPTER LENS DUE TO REFRACTIVE SURPRISE. THE PROBLEM WAS RESOLVED. THE CAUSE OF THE EVENT IS REPORTED AS UNKNOWN. Manufacturer Narrative: H3- DE…	OD	Physician	12/31/2021	2021	29	Female
https://www.accessdata.fda.gov/scripts/cdrh/cfdocs/cfMAUDE/Detail.CFM?MDRFOI__ID=14862585&pc=MTA	2023826-2022-01899	2021-11-24 05:00:00	Injury	STAAR SURGICAL COMPANY	2022-06-29 04:00:00	MTA	IMPLANTABLE COLLAMER LENS (ICL)	Misfocusing	Blurred Vision	P030016	Event Description: THE REPORTER INDICATED THAT A 12.1MM VICM5_12.1 IMPLANTABLE COLLAMER LENS OF -5.5 DIOPTER WAS IMPLANTED INTO THE PATIENT'S RIGHT EYE (OD) ON (B)(6) 2021. ON (B)(6) 2021 THE LENS WAS EXCHANGED WITH A LONGER LENS OF DIFFERENT DIOPTER DUE TO REFRACTIVE SURPRISE. THE EXCHANGE RESOLVED THE PROBLEM. Manufacturer Narrative: LENS WORK ORDER SEARCH: NO SIMILAR COMPLAINTS REPORTED FOR UN…	OD	Physician	06/01/2022	2022	33	Female
https://www.accessdata.fda.gov/scripts/cdrh/cfdocs/cfMAUDE/Detail.CFM?MDRFOI__ID=13173031&pc=MTA	2023826-2022-00099	2021-12-06 05:00:00	Injury	STAAR SURGICAL COMPANY	2022-01-05 05:00:00	MTA	IMPLANTABLE COLLAMER LENS (ICL)	Misfocusing	Blurred Vision		Event Description: THE REPORTER INDICATED THAT THE SURGEON IMPLANTED A 13.7MM VICMO13.7; -15.5 DIOPTER IMPLANTABLE COLLAMER LENS INTO THE PATIENT'S LEFT EYE (OS) ON (B)(6) 2021. THE PATIENT EXPERIENCED REFRACTIVE SURPRISE AND ALSO REFRACTIVE CHANGE OVER TIME. ON (B)(6) 2021 THE LENS WAS EXCHANGED WITH A SAME LENGTH BUT DIFFERENT MODEL/POWER LENS AND THIS RESOLVED THE PROBLEM. THE CAUSE OF THE EVE…	OS	Physician	12/30/2021	2021	34	Female
https://www.accessdata.fda.gov/scripts/cdrh/cfdocs/cfMAUDE/Detail.CFM?MDRFOI__ID=15738720&pc=MTA	2023826-2022-03992	2021-12-13 05:00:00	Injury	STAAR SURGICAL COMPANY	2022-11-04 04:00:00	MTA	IMPLANTABLE COLLAMER LENS (ICL)	Misfocusing	Blurred Vision	P030016	Event Description: THE REPORTER INDICATED THAT THE SURGEON IMPLANTED A 13.2MM VICM5_13.2; -5.50 DIOPTER IMPLANTABLE COLLAMER LENS INTO THE PATIENT'S RIGHT EYE (OD) ON (B)(6) 2021. IT WAS INDICATED THE PATIENT HAD PERMANENT LOSS OF BCVA AND BLURRED VISION. THE CAUSE OF THE EVENT WAS REPORTED AS "OTHER" AND NOTED "RESIDUAL ASTIGMATISM REMAINS". THE LENS WAS EXPLANTED. ON (B)(6) 2022 A REPLACEMENT L…	OD	Physician	10/07/2022	2022	31	Female
https://www.accessdata.fda.gov/scripts/cdrh/cfdocs/cfMAUDE/Detail.CFM?MDRFOI__ID=14862904&pc=MTA	2023826-2022-01905	2021-12-30 05:00:00	Injury	STAAR SURGICAL COMPANY	2022-06-29 04:00:00	MTA	IMPLANTABLE COLLAMER LENS (ICL)	Misfocusing	Blurred Vision	P030016	Event Description: THE REPORTER INDICATED THAT A 12.1MM VICM5_12.1 IMPLANTABLE COLLAMER LENS OF -2.75 DIOPTER WAS IMPLANTED INTO THE PATIENT'S LEFT EYE (OS) ON (B)(6) 2021. ON (B)(6) 2022 THE LENS WAS EXCHANGED WITH A LENS OF DIFFERENT DIOPTER DUE TO REFRACTIVE SURPRISE. THE EXCHANGE RESOLVED THE PROBLEM. Manufacturer Narrative: (B)(4). Manufacturer Narrative: DEVICE EVALUATION: H3 - DEVICE EVALU…	OS	Physician	06/10/2022	2022	38	Female
https://www.accessdata.fda.gov/scripts/cdrh/cfdocs/cfMAUDE/Detail.CFM?MDRFOI__ID=13981610&pc=MTA	2023826-2022-01046	2022-01-05 05:00:00	Injury	STAAR SURGICAL COMPANY	2022-04-01 04:00:00	MTA	IMPLANTABLE COLLAMER LENS (ICL)	Misfocusing	Blurred Vision	NA	Event Description: THE REPORTER INDICATED THAT A 12.6MM VICM5_12.6 IMPLANTABLE COLLAMER LENS OF -5.0 DIOPTER WAS IMPLANTED INTO THE PATIENT'S RIGHT EYE (OD) ON (B)(6) 2021. ON (B)(6) 2022 THE LENS WAS EXCHANGED WITH A DIFFERENT DIOPTER LENS DUE TO REFRACTIVE SURPRISE. THE EXCHANGE RESOLVED THE PROBLEM. CAUSE IS REPORTED AS UNKNOWN. Manufacturer Narrative: THIS PRODUCT IS NOT MARKETED IN THE U.S. …	OD	Physician	03/07/2022	2022	28	Male
https://www.accessdata.fda.gov/scripts/cdrh/cfdocs/cfMAUDE/Detail.CFM?MDRFOI__ID=13998315&pc=MTA	2023826-2022-00978	2022-01-15 05:00:00	Injury	STAAR SURGICAL COMPANY	2022-04-04 04:00:00	MTA	IMPLANTABLE COLLAMER LENS (ICL)	Misfocusing	Blurred Vision	NA	Event Description: THE REPORTER INDICATED THAT A 12.6MM VICMO12.6 IMPLANTABLE COLLAMER LENS OF -3.5 DIOPTER WAS IMPLANTED INTO THE PATIENT'S LEFT EYE (OS) ON (B)(6) 2021. ON (B)(6) 2022 THE LENS WAS EXCHANGED WITH A NEW MODEL LENS OF DIFFERENT DIOPTER DUE TO REFRACTIVE SURPRISE AND GHOSTING. THE EXCHANGE RESOLVED THE PROBLEM. CAUSE IS REPORTED AS UNKNOWN. Manufacturer Narrative: H3 - DEVICE EVALU…	OS	Physician	03/21/2022	2022	39	Male
https://www.accessdata.fda.gov/scripts/cdrh/cfdocs/cfMAUDE/Detail.CFM?MDRFOI__ID=14862403&pc=MTA	2023826-2022-02091	2022-02-03 05:00:00	Injury	STAAR SURGICAL COMPANY	2022-06-29 04:00:00	MTA	IMPLANTABLE COLLAMER LENS (ICL)	Misfocusing	Blurred Vision	P030016	Event Description: THE REPORTER INDICATED THAT THE SURGEON IMPLANTED A 12.6MM VICM5_12.6; -8.00 DIOPTER IMPLANTABLE COLLAMER LENS INTO THE PATIENT'S LEFT EYE (OS) ON (B)(6) 2022. THE PATIENT EXPERIENCED REFRACTIVE SURPRISE. ON (B)(6) 2022 THE LENS WAS EXCHANGED WITH A SAME MODEL/LENGTH LENS BUT DIFFERENT POWER. THIS RESOLVED THE PROBLEM. Manufacturer Narrative: H3 - DEVICE EVALUATION: LENS WAS RE…	OS	Physician	06/23/2022	2022	24	Female
https://www.accessdata.fda.gov/scripts/cdrh/cfdocs/cfMAUDE/Detail.CFM?MDRFOI__ID=14504752&pc=MTA	2023826-2022-01688	2022-02-09 05:00:00	Injury	STAAR SURGICAL COMPANY	2022-05-26 04:00:00	MTA	IMPLANTABLE COLLAMER LENS (ICL)	Misfocusing	Blurred Vision	P030016	Event Description: THE REPORTER INDICATED THAT THE SURGEON IMPLANTED A 13.2MM VICMO13.2; -6.5 DIOPTER IMPLANTABLE COLLAMER LENS INTO THE PATIENT'S LEFT EYE (OS) ON (B)(6) 2020. THE PATIENT EXPERIENCED REFRACTIVE SURPRISE. ON (B)(6) 2022 THE LENS WAS EXCHANGED WITH A SAME SIZE BUT DIFFERENT POWER LENS AND THIS RESOLVED THE PROBLEM. THE CAUSE OF THE EVENT WAS REPORTED AS UNKNOWN. Manufacturer Narra…	OS	Physician	05/19/2022	2022	32	Female
https://www.accessdata.fda.gov/scripts/cdrh/cfdocs/cfMAUDE/Detail.CFM?MDRFOI__ID=13795182&pc=MTA	2023826-2022-00797	2022-02-16 05:00:00	Malfunction	STAAR SURGICAL COMPANY	2022-03-17 04:00:00	MTA	IMPLANTABLE COLLAMER LENS (ICL)	Misfocusing	Blurred Vision	NA	Event Description: THE REPORTER INDICATED THE SURGEON IMPLANTED A 13.2MM VICM6_13.2 IMPLANTABLE COLLAMER LENS, -09.00 DIOPTER, INTO THE PATIENTS RIGHT EYE (OD) ON (B)(6) 2021. THE PATIENT COMPLAINED OF BLURRY/FOGGY VISION WHEN THE LIGHT CONDITIONS GO FROM DARK TO LIGHT. THE LENS REMAINED IMPLANTED. THE CAUSE OF THE EVENT WAS UNKNOWN. ADDITIONAL INFORMATION HAS BEEN REQUESTED BUT NONE HAS BEEN FOR…	OD	Physician	02/21/2022	2022	54	Female
https://www.accessdata.fda.gov/scripts/cdrh/cfdocs/cfMAUDE/Detail.CFM?MDRFOI__ID=13944339&pc=MTA	2023826-2022-01025	2022-02-24 05:00:00	Injury	STAAR SURGICAL COMPANY	2022-03-29 04:00:00	MTA	IMPLANTABLE COLLAMER LENS (ICL)	Misfocusing	Blurred Vision		Event Description: THE REPORTER INDICATED THAT THE SURGEON IMPLANTED A 13.2MM VICM5_13.2; -8.00 DIOPTER IMPLANTABLE COLLAMER LENS INTO THE PATIENT'S LEFT EYE (OS) ON (B)(6) 2021. THE SURGEON REPORTS REFRACTIVE SURPRISE WITH A PLANNED LENS EXCHANGE. LENS REMAINS IMPLANTED. ATTEMPTS TO OBTAIN ADDITIONAL INFORMATION HAVE NOT BEEN SUCCESSFUL. IF ADDITIONAL INFORMATION IS RECEIVED A SUPPLEMENTAL MEDWA…	OS	Physician	03/03/2022	2022	52	Female
https://www.accessdata.fda.gov/scripts/cdrh/cfdocs/cfMAUDE/Detail.CFM?MDRFOI__ID=13944425&pc=MTA	2023826-2022-01024	2022-02-24 05:00:00	Injury	STAAR SURGICAL COMPANY	2022-03-29 04:00:00	MTA	IMPLANTABLE COLLAMER LENS (ICL)	Misfocusing	Blurred Vision		Event Description: THE REPORTED INDICATED THAT THE SURGEON IMPLANTED A 13.2MM VICM5_13.2; -8.00 DIOPTER IMPLANTABLE COLLAMER LENS INTO THE PATIENT'S RIGHT EYE (OD) ON (B)(4) 2021. THE SURGEON REPORTS REFRACTIVE SURPRISE WITH A PLANNED LENS EXCHANGE. LENS REMAINS IMPLANTED. ATTEMPTS TO OBTAIN ADDITIONAL INFORMATION HAVE NOT BEEN SUCCESSFUL. IF ADDITIONAL INFORMATION IS RECEIVED A SUPPLEMENTAL MEDW…	OD	Physician	03/03/2022	2022	52	Female
https://www.accessdata.fda.gov/scripts/cdrh/cfdocs/cfMAUDE/Detail.CFM?MDRFOI__ID=14365578&pc=MTA	2023826-2022-01518	2022-02-25 05:00:00	Injury	STAAR SURGICAL COMPANY	2022-05-11 04:00:00	MTA	IMPLANTABLE COLLAMER LENS (ICL)	Misfocusing	Blurred Vision	P030016	Event Description: THE REPORTER INDICATED THAT A 12.1MM VICM5 12.1 IMPLANTABLE COLLAMER LENS OF -8.50 DIOPTER WAS IMPLANTED INTO THE PATIENT'S LEFT EYE (OS) ON (B)(6) 2022. REFRACTIVE SURPRISE WAS OBSERVED. ON (B)(6) 2022 THE LENS WAS EXCHANGED FOR A SAME MODEL AND SIZE BUT -9.0 DIOPTER. THE EXCHANGE LENS RESOLVED THE PROBLEM. Manufacturer Narrative: H3 DEVICE EVALUATION: THE LENS WAS RETURNED DR…	OS	Physician	04/12/2022	2022	44	Female
https://www.accessdata.fda.gov/scripts/cdrh/cfdocs/cfMAUDE/Detail.CFM?MDRFOI__ID=16720053&pc=MTA	2023826-2023-01357	2022-03-18 04:00:00	Injury	STAAR SURGICAL COMPANY	2023-04-11 04:00:00	MTA	IMPLANTABLE COLLAMER LENS (ICL)	Misfocusing	Blurred Vision	P030016	Event Description: THE REPORTER INDICATED THAT THE SURGEON IMPLANTED A 12.1MM VICMO12.1; -9.0 DIOPTER IMPLANTABLE COLLAMER LENS INTO THE PATIENT'S RIGHT EYE (OD) ON (B)(6) 2022. THE PATIENT EXPERIENCED REFRACTIVE SURPRISE. ON 11-FEB-2023 THE LENS WAS EXCHANGED WITH THE SAME LENGTH LENS BUT TORIC MODEL. THIS RESOLVED THE PROBLEM. THE CAUSE OF THE EVENT WAS REPORTED AS UNKNOWN. Manufacturer Narrati…	OD	Physician	08/21/2023	2023	30	Female
https://www.accessdata.fda.gov/scripts/cdrh/cfdocs/cfMAUDE/Detail.CFM?MDRFOI__ID=14220682&pc=MTA	2023826-2022-01098	2022-03-24 04:00:00	Malfunction	STAAR SURGICAL COMPANY	2022-04-27 04:00:00	MTA	IMPLANTABLE COLLAMER LENS (ICL)	Misfocusing	Blurred Vision	NA	Event Description: THE REPORTER INDICATED THAT A 12.1MM VICM6_12.1 IMPLANTABLE COLLAMER LENS OF -7.00 DIOPTER WAS IMPLANTED INTO THE PATIENT'S RIGHT EYE (OD) ON (B)(6) 2022. REFRACTIVE SURPRISE REPORTED WITH -1.50 SPHERE RESIDUAL ERROR. LENS REMAINS IMPLANTED. CAUSE IS REPORTED AS UNKNOWN. Manufacturer Narrative: CLAIM# (B)(4).	OD	Physician	04/04/2022	2022	47	Female
https://www.accessdata.fda.gov/scripts/cdrh/cfdocs/cfMAUDE/Detail.CFM?MDRFOI__ID=14220740&pc=MTA	2023826-2022-01099	2022-03-24 04:00:00	Malfunction	STAAR SURGICAL COMPANY	2022-04-27 04:00:00	MTA	IMPLANTABLE COLLAMER LENS (ICL)	Misfocusing	Blurred Vision	NA	Event Description: THE REPORTER INDICATED THAT A 12.1MM VICM6_12.1 IMPLANTABLE COLLAMER LENS OF -6.00 DIOPTER WAS IMPLANTED INTO THE PATIENT'S LEFT EYE (OS) ON (B)(6) 2022. REFRACTIVE SURPRISE REPORTED WITH -1.75 SPHERE RESIDUAL ERROR. LENS REMAINS IMPLANTED. CAUSE IS REPORTED AS UNKNOWN. Manufacturer Narrative: THIS PRODUCT IS NOT MARKETED IN THE US. CLAIM# (B)(4).	OS	Physician	04/04/2022	2022	47	Female
https://www.accessdata.fda.gov/scripts/cdrh/cfdocs/cfMAUDE/Detail.CFM?MDRFOI__ID=14862698&pc=MTA	2023826-2022-02025	2022-04-01 04:00:00	Injury	STAAR SURGICAL COMPANY	2022-06-29 04:00:00	MTA	IMPLANTABLE COLLAMER LENS (ICL)	Misfocusing	Blurred Vision	P030016	Event Description: THE REPORTER INDICATED THAT A 13.2MM VICMO13.2 IMPLANTABLE COLLAMER LENS OF -15.5 DIOPTER WAS IMPLANTED INTO THE PATIENT'S LEFT EYE (OS) ON (B)(6) 2022. ON (B)(6) 2022 THE LENS WAS EXCHANGED WITH A SAME LENGTH LENS OF DIFFERENT DIOPTER DUE TO REFRACTIVE SURPRISE. THE EXCHANGE RESOLVED THE PROBLEM. CAUSE OF THE EVENT IS UNKNOWN. Manufacturer Narrative: H6: TYPE OF INVESTIGATION …	OS	Physician	06/15/2022	2022	25	Male
https://www.accessdata.fda.gov/scripts/cdrh/cfdocs/cfMAUDE/Detail.CFM?MDRFOI__ID=15801811&pc=MTA	2023826-2022-03954	2022-04-04 04:00:00	Injury	STAAR SURGICAL COMPANY	2022-11-15 05:00:00	MTA	IMPLANTABLE COLLAMER LENS (ICL)	Misfocusing	Blurred Vision	P030016	Event Description: THE REPORTER INDICATED THAT A 12.6MM VICM512.6 IMPLANTABLE COLLAMER LENS OF -7.5 DIOPTER WAS IMPLANTED IN THE PATIENT'S LEFT EYE (OS). ON (B)(6) 2022, THE LENS WAS REMOVED AND REPLACED DUE TO REFRACTIVE SURPRISE. Manufacturer Narrative: DEVICE EVALUATED BY MFR: WORK ORDER SEARCH FOUND NO SIMILAR COMPLAINTS. CLAIM# (B)(4). Manufacturer Narrative: B5: LENS WAS IMPLANTED ON (B)(6)…	OS	Physician	10/16/2022	2022
https://www.accessdata.fda.gov/scripts/cdrh/cfdocs/cfMAUDE/Detail.CFM?MDRFOI__ID=14417748&pc=MTA	2023826-2022-01591	2022-04-06 04:00:00	Injury	STAAR SURGICAL COMPANY	2022-05-17 04:00:00	MTA	IMPLANTABLE COLLAMER LENS (ICL)	Misfocusing	Blurred Vision	P030016	Event Description: THE REPORTER INDICATED THAT THE SURGEON IMPLANTED A 12.6MM VICM6; -6.00 DIOPTER IMPLANTABLE COLLAMER LENS INTO THE PATIENT'S RIGHT EYE (OD) ON (B)(6) 2022. THE PATIENT HAS PERMANENT LOSS OF BCVA AND IT WAS NOTED "PATIENT HAS COMPLAINTS OF POOR FAR AND NEAR VISION". LENS REMAINS IMPLANTED. Manufacturer Narrative: ADDITIONAL INFORMATION: B5 - THE REPORTER INDICATED THAT THE SURGE…	OD	Physician	04/19/2022	2022	46	Female
https://www.accessdata.fda.gov/scripts/cdrh/cfdocs/cfMAUDE/Detail.CFM?MDRFOI__ID=14455997&pc=MTA	2023826-2022-01621	2022-04-11 04:00:00	Malfunction	STAAR SURGICAL COMPANY	2022-05-20 04:00:00	MTA	IMPLANTABLE COLLAMER LENS (ICL)	Misfocusing	Blurred Vision	NA	Event Description: THE REPORTER INDICATED THAT A PATIENT HAS COMPLAINTS IN LEFT EYE (OS) OF POOR FAR AND NEAR VISION POST VIVA IMPLANTABLE COLLAMER LENS IMPLANTATION. LENS REMAINS IMPLANTED. ADDITIONAL INFORMATION HAS BEEN REQUESTED BUT NONE HAS BEEN FORTHCOMING. IF ADDITIONAL INFORMATION IS RECEIVED A SUPPLEMENTAL MEDWATCH REPORT WILL BE SUBMITTED. Manufacturer Narrative: B5-THE REPORTER INDICAT…	OS	Physician	04/19/2022	2022	41	Male
https://www.accessdata.fda.gov/scripts/cdrh/cfdocs/cfMAUDE/Detail.CFM?MDRFOI__ID=15153652&pc=MTA	2023826-2022-02582	2022-05-10 04:00:00	Injury	STAAR SURGICAL COMPANY	2022-08-02 04:00:00	MTA	IMPLANTABLE COLLAMER LENS (ICL)	Misfocusing	Blurred Vision	P030016	Event Description: THE REPORTER INDICATED THAT A 12.1MM VICM5_12.1 IMPLANTABLE COLLAMER LENS OF -12.0 DIOPTER WAS IMPLANTED INTO THE PATIENT'S LEFT EYE (OS) ON (B)(6) 2022. ON (B)(6) 2022 THE LENS WAS EXCHANGED FOR A DIFFERENT POWER LENS DUE TO REFRACTIVE SURPRISE. THE EXCHANGE RESOLVED THE PROBLEM. CAUSE IS REPORTED AS UNKNOWN. Manufacturer Narrative: (B)(4). CLAIM# (B)(4). Manufacturer Narrativ…	OS	Physician	07/04/2022	2022	46
https://www.accessdata.fda.gov/scripts/cdrh/cfdocs/cfMAUDE/Detail.CFM?MDRFOI__ID=15061062&pc=MTA	2023826-2022-02329	2022-05-12 04:00:00	Injury	STAAR SURGICAL COMPANY	2022-07-19 04:00:00	MTA	IMPLANTABLE COLLAMER LENS (ICL)	Misfocusing	Blurred Vision	P030016	Event Description: THE REPORTER INDICATED THAT THE SURGEON IMPLANTED A 13.2MM VICM5_13.2; -5.00 DIOPTER IMPLANTABLE COLLAMER LENS INTO THE PATIENT'S RIGHT EYE (OD) ON (B)(6) 2022. THE PATIENT EXPERIENCED REFRACTIVE SURPRISE. ON (B)(6) 2022 THE LENS WAS EXCHANGE WITH A SAME LENGTH/MODEL LENS BUT DIFFERENT POWER AND THE PROBLEM WAS RESOLVED. THE CAUSE OF THE EVENT WAS REPORTED AS USER ERROR AND IT …	OD	Physician	07/12/2022	2022	47	Female
https://www.accessdata.fda.gov/scripts/cdrh/cfdocs/cfMAUDE/Detail.CFM?MDRFOI__ID=16423702&pc=MTA	2023826-2023-00619	2022-05-18 04:00:00	Injury	STAAR SURGICAL COMPANY	2023-02-22 05:00:00	MTA	IMPLANTABLE COLLAMER LENS (ICL)	Misfocusing	Blurred Vision	P030016	Event Description: THE REPORTER INDICATED THAT A 12.6MM VICM5 12.6 IMPLANTABLE COLLAMER LENS OF -3.50 DIOPTER WAS IMPLANTED INTO THE PATIENT'S RIGHT EYE (OD) ON (B)(6) 2022. REFRACTIVE SURPRISE WAS OBSERVED. ON (B)(6) 2022 THE LENS WAS EXCHANGED FOR A TORIC MODEL AND SAME SIZE LENS. THE REPLACEMENT LENS RESOLVED THE PROBLEM. CAUSE REPORTED AS UNKNOWN. Manufacturer Narrative: H3: DEVICE EVALUATION…	OD	Physician	02/01/2023	2023	37	Male
https://www.accessdata.fda.gov/scripts/cdrh/cfdocs/cfMAUDE/Detail.CFM?MDRFOI__ID=14862210&pc=MTA	2023826-2022-01907	2022-05-31 04:00:00	Injury	STAAR SURGICAL COMPANY	2022-06-29 04:00:00	MTA	IMPLANTABLE COLLAMER LENS (ICL)	Misfocusing	Blurred Vision	P030016	Event Description: THE REPORTER INDICATED THAT A 13.2MM VICM5_13.2 IMPLANTABLE COLLAMER LENS OF -7.5 DIOPTER WAS IMPLANTED INTO THE PATIENT'S LEFT EYE (OS) ON (B)(6) 2021. REFRACTIVE SURPRISE REPORTED. REPORTEDLY RESIDUAL ASTIGMATISM WAS CORRECTED BY INCISION. THE LENS REMAINS IMPLANTED. Manufacturer Narrative: PT INFO: UNK. LENS WORK ORDER SEARCH-NO SIMILAR COMPLAINTS REPORTED FOR UNITS WITHIN T…	OS	Physician	06/13/2022	2022		Female
https://www.accessdata.fda.gov/scripts/cdrh/cfdocs/cfMAUDE/Detail.CFM?MDRFOI__ID=15697668&pc=MTA	2023826-2022-03892	2022-06-10 04:00:00	Injury	STAAR SURGICAL COMPANY	2022-10-30 04:00:00	MTA	IMPLANTABLE COLLAMER LENS (ICL)	Misfocusing	Blurred Vision	P030016	Event Description: THE REPORTER INDICATED THAT A 12.1MM VICM512.1 IMPLANTABLE COLLAMER LENS OF -6.0 DIOPTER WAS IMPLANTED INTO THE PATIENT'S LEFT EYE (OS) ON (B)(6) 2022. ON (B)(6) 2022, THE LENS WAS REMOVED DUE TO PRODUCT NON-CONFORMITY. REPORTEDLY, "FELLOW EYE LENS VAULTING WAS EXPLANTED DUE TO EXCESSIVE INFLAMMATION AND CELLS POST OP, PATIENT IS TRAUMATISED WITH THE WHOLE EXPERIENCE, PATIENT C…	OS	Physician	10/06/2022	2022	23	Female
https://www.accessdata.fda.gov/scripts/cdrh/cfdocs/cfMAUDE/Detail.CFM?MDRFOI__ID=15298835&pc=MTA	2023826-2022-02920	2022-06-11 04:00:00	Injury	STAAR SURGICAL COMPANY	2022-08-25 04:00:00	MTA	IMPLANTABLE COLLAMER LENS (ICL)	Misfocusing	Blurred Vision	P030016	Event Description: THE REPORTER INDICATED THAT THE SURGEON IMPLANTED A 12.6MM VICMO12.6; -10.0 DIOPTER IMPLANTABLE COLLAMER LENS INTO THE PATIENT'S RIGHT EYE (OD) ON (B)(6) 2022. THE PATIENT EXPERIENCED REFRACTIVE CHANGE OVER TIME. ON (B)(6) 2022 THE LENS WAS EXCHANGED WITH A SAME LENGTH BUT DIFFERENT POWER LENS AND THIS RESOLVED THE PROBLEM. THE CAUSE OF THE EVENT WAS REPORTED AS UNKNOWN. Manufa…	OD	Physician	08/22/2022	2022	44	Female
https://www.accessdata.fda.gov/scripts/cdrh/cfdocs/cfMAUDE/Detail.CFM?MDRFOI__ID=17228874&pc=MTA	2023826-2023-02567	2022-06-17 04:00:00	Injury	STAAR SURGICAL COMPANY	2023-06-29 04:00:00	MTA	IMPLANTABLE COLLAMER LENS (ICL)	Misfocusing	Blurred Vision	P030016	Event Description: THE REPORTER INDICATED THAT A 12.6MM VICM5_12.6 IMPLANTABLE COLLAMER LENS OF -4.50 DIOPTER WAS IMPLANTED INTO THE PATIENT'S RIGHT EYE (OD) ON (B)(6) 2022. REFRACTIVE TREATMENT WAS PERFORMED ON (B)(6) 2022 DUE TO REFRACTIVE SURPRISE AND THE PROBLEM RESOLVED. IN THE REPORTERS OPINION THE CAUSE OF THE EVENT WAS UNKNOWN. Manufacturer Narrative: H6 - TYPE OF INVESTIGATION - LENS WOR…	OD	Physician	06/05/2023	2023	31	Male
https://www.accessdata.fda.gov/scripts/cdrh/cfdocs/cfMAUDE/Detail.CFM?MDRFOI__ID=15276405&pc=MTA	2023826-2022-02828	2022-06-24 04:00:00	Injury	STAAR SURGICAL COMPANY	2022-08-23 04:00:00	MTA	IMPLANTABLE COLLAMER LENS (ICL)	Misfocusing	Blurred Vision	P030016	Event Description: THE REPORTER INDICATED THAT A 12.6MM VICMO12.6 IMPLANTABLE COLLAMER LENS OF -6.0 DIOPTER WAS IMPLANTED IN THE PATIENT'S RIGHT EYE (OD) ON (B)(6) 2022. ON (B)(6) 2022, THE LENS WAS EXCHANGED FOR A SAME MODEL, SAME SIZE LENS DUE TO REFRACTIVE SURPRISE. THE PROBLEM WAS RESOLVED. CAUSE OF THE EVENT IS OTHER. Manufacturer Narrative: B5: CAUSE OF THE EVENT IS UNKNOWN. CLAIM# (B)(4). …	OD	Physician	10/27/2022	2022	32	Female
https://www.accessdata.fda.gov/scripts/cdrh/cfdocs/cfMAUDE/Detail.CFM?MDRFOI__ID=17822417&pc=MTA	2023826-2023-04280	2022-06-28 04:00:00	Injury	STAAR SURGICAL COMPANY	2023-09-26 04:00:00	MTA	IMPLANTABLE COLLAMER LENS (ICL)	Misfocusing	Blurred Vision	P030016	Event Description: THE REPORTER INDICATED THAT A 13.2MM VICM5_13.2 IMPLANTABLE COLLAMER LENS OF -2.50 DIOPTER WAS IMPLANTED INTO THE PATIENT'S LEFT EYE (OS) ON (B)(6) 2023. ON (B)(6) 2023 THE LENS WAS EXCHANGED FOR A DIFFERENT MODEL (TORIC LENS) AND POWER LENS. THIS EXCHANGE RESOLVED THE PROBLEM. PER REPORTER THE DEVICE DID NOT FAIL TO PERFORM AS INTENDED "PATIENT DIDN'T REACH EXPECTED VA" WAS RE…	OS	Physician	09/05/2023	2023	36	Male
https://www.accessdata.fda.gov/scripts/cdrh/cfdocs/cfMAUDE/Detail.CFM?MDRFOI__ID=15921202&pc=MTA	2023826-2022-04343	2022-07-06 04:00:00	Injury	STAAR SURGICAL COMPANY	2022-12-05 05:00:00	MTA	IMPLANTABLE COLLAMER LENS (ICL)	Misfocusing	Blurred Vision	P030016	Event Description: THE REPORTER INDICATED THE SURGEON IMPLANTED A 12.6MM VICM5_12.6 IMPLANTABLE COLLAMER LENS, -04.00 DIOPTER, INTO THE PATIENTS RIGHT EYE (OD) ON (B)(6) 2022. THE LENS WAS REMOVED ON (B)(6) 2022 DUE TO THE PATIENT EXPERIENCED A REFRACTIVE SURPRISE AND BLURRED VISION. THE LENS WAS REPLACED WITH A SHORTER LENS AND THE PROBLEM WAS RESOLVED. THE CAUSE OF THE EVENT WAS UNKNOWN. Manufa…	OD	Physician	11/08/2022	2022	42	Female
https://www.accessdata.fda.gov/scripts/cdrh/cfdocs/cfMAUDE/Detail.CFM?MDRFOI__ID=18101043&pc=MTA	2023826-2023-05054	2022-07-07 04:00:00	Malfunction	STAAR SURGICAL COMPANY	2023-11-09 05:00:00	MTA	IMPLANTABLE COLLAMER LENS (ICL)	Misfocusing	Blurred Vision	P030016	Event Description: THE REPORTER INDICATED THAT A 12.6MM VICM5_12.6 IMPLANTABLE COLLAMER LENS OF -8.50 DIOPTER WAS IMPLANTED INTO THE PATIENT'S RIGHT EYE (OD) ON (B)(6) 2022. THE PATIENT EXPERIENCED REFRACTIVE SURPRISE, SLIGHTLY MORE HYPEROPIC THAN PLANNED, UDVA IS 1.0. PATIENT IS DISSATISFIED WITH NEAR VISION AND COMPUTER DISTANCE, LENS REMAINS IMPLANTED. IF ADDITIONAL INFORMATION IS RECEIVED A S…	OD	Physician	10/13/2023	2023	50	Female
https://www.accessdata.fda.gov/scripts/cdrh/cfdocs/cfMAUDE/Detail.CFM?MDRFOI__ID=15160364&pc=MTA	2023826-2022-02614	2022-07-17 04:00:00	Injury	STAAR SURGICAL COMPANY	2022-08-03 04:00:00	MTA	IMPLANTABLE COLLAMER LENS (ICL)	Misfocusing	Blurred Vision	P030016	Event Description: THE REPORTER INDICATED THAT THE SURGEON IMPLANTED A 12.6MM VICMO12.6; -13.5 DIOPTER IMPLANTABLE COLLAMER LENS INTO THE PATIENT'S LEFT EYE (OS) ON (B)(6) 2022. THE PATIENT HAD EXPERIENCED REFRACTIVE SURPRISE. ON (B)(6) 2022 THE LENS WAS EXCHANGED WITH A SAME MODEL/LENGTH LENS BUT DIFFERENT POWER. IT WAS ADDITIONALLY NOTED AFTER INITIAL IMPLANTATION OF POSTOPERATIVE VISION; IT CO…	OS	Physician	08/02/2022	2022	42	Male
https://www.accessdata.fda.gov/scripts/cdrh/cfdocs/cfMAUDE/Detail.CFM?MDRFOI__ID=15882900&pc=MTA	2023826-2022-04253	2022-07-17 04:00:00	Injury	STAAR SURGICAL COMPANY	2022-11-29 05:00:00	MTA	IMPLANTABLE COLLAMER LENS (ICL)	Misfocusing	Blurred Vision	P030016	Event Description: THE REPORTER INDICATED THAT THE SURGEON IMPLANTED A 12.6MM VICMO12.6; -14.5 DIOPTER IMPLANTABLE COLLAMER LENS INTO THE PATIENT'S LEFT EYE (OS) ON (B)(6) 2022. THE PATIENT EXPERIENCED REFRACTIVE SURPRISE. ON (B)(6) 2022 THE LENS WAS EXCHANGED WITH A SAME LENGTH BUT DIFFERENT MODEL/POWER LENS AND THIS RESOLVED THE PROBLEM. Manufacturer Narrative: H3: DEVICE EVALUATION - LENS WAS …	OS	Physician	11/19/2022	2022	34	Male
https://www.accessdata.fda.gov/scripts/cdrh/cfdocs/cfMAUDE/Detail.CFM?MDRFOI__ID=15712752&pc=MTA	2023826-2022-03897	2022-07-24 04:00:00	Injury	STAAR SURGICAL COMPANY	2022-11-01 04:00:00	MTA	IMPLANTABLE COLLAMER LENS (ICL)	Misfocusing	Blurred Vision	P030016	Event Description: THE REPORTER INDICATED THAT A 12.6MM VICMO12.6 IMPLANTABLE COLLAMER LENS OF A -7.5 DIOPTER WAS IMPLANTED IN THE PATIENT'S RIGHT EYE (OD) ON (B)(6) 2022. ON (B)(6) 2022, THE LENS WAS EXCHANGED FOR A TORIC LENS DUE TO REFRACTIVE SURPRISE. THE PROBLEM WAS RESOLVED. CAUSE OF THE EVENT IS UNKNOWN. Manufacturer Narrative: (B)(4). CLAIM# (B)(4). Manufacturer Narrative: H3: DEVICE EVAL…	OD	Physician	10/07/2022	2022	22	Female
https://www.accessdata.fda.gov/scripts/cdrh/cfdocs/cfMAUDE/Detail.CFM?MDRFOI__ID=15712753&pc=MTA	2023826-2022-03898	2022-07-24 04:00:00	Injury	STAAR SURGICAL COMPANY	2022-11-01 04:00:00	MTA	IMPLANTABLE COLLAMER LENS (ICL)	Misfocusing	Blurred Vision	P030016	Event Description: THE REPORTER INDICATED THAT A 12.6MM VICMO12.6 IMPLANTABLE COLLAMER LENS OF A -8.0 DIOPTER WAS IMPLANTED IN THE PATIENT'S LEFT EYE (OS) ON (B)(6) 2022. ON (B)(6) 2022, THE LENS WAS EXCHANGED FOR A TORIC LENS DUE TO REFRACTIVE SURPRISE. THE PROBLEM WAS RESOLVED. CAUSE OF THE EVENT IS UNKNOWN. Manufacturer Narrative: NO SIMILAR COMPLAINTS WITHIN ASSOCIATED LOTS WERE FOUND. (B)(4)…	OS	Physician	10/07/2022	2022	22	Female
https://www.accessdata.fda.gov/scripts/cdrh/cfdocs/cfMAUDE/Detail.CFM?MDRFOI__ID=16728673&pc=MTA	2023826-2023-01334	2022-08-07 04:00:00	Injury	STAAR SURGICAL COMPANY	2023-04-12 04:00:00	MTA	IMPLANTABLE COLLAMER LENS (ICL)	Misfocusing	Blurred Vision	P030016	Event Description: THE REPORTER INDICATED THAT A 13.2MM VICMO13.2 IMPLANTABLE COLLAMER LENS OF -7.0 DIOPTER WAS IMPLANTED IN THE PATIENT'S LEFT EYE (OS) ON (B)(6) 2022. ON (B)(6) 2022, THE LENS WAS EXCHANGED FOR DUE TO REFRACTIVE CHANGE OVERTIME. THE PROBLEM WAS RESOLVED. CAUSE OF THE EVENT IS UNKNOWN. Manufacturer Narrative: H6: WORK ORDER SEARCH: NO SIMILAR COMPLAINTS WITHIN ASSOCIATED LOTS WER…	OS	Physician	03/14/2023	2023	32	Female
https://www.accessdata.fda.gov/scripts/cdrh/cfdocs/cfMAUDE/Detail.CFM?MDRFOI__ID=15712749&pc=MTA	2023826-2022-03896	2022-08-22 04:00:00	Injury	STAAR SURGICAL COMPANY	2022-11-01 04:00:00	MTA	IMPLANTABLE COLLAMER LENS (ICL)	Misfocusing	Blurred Vision	P030016	Event Description: THE REPORTER INDICATED THAT A 12.1MM VICMO12.1 IMPLANTABLE COLLAMER LENS OF -5.5 DIOPTER WAS IMPLANTED INTO THE PATIENT'S LEFT EYE (OS) ON (B)(6) 2022. ON (B)(6) 2022, THE LENS WAS REMOVED DUE TO TRANSIENT LOSS OF BCVA. IN A SUBSEQUENT SURGERY LATER THAT DAY, A REPLACEMENT LENS WAS IMPLANTED AND THE PROBLEM WAS RESOLVED. CAUSE REPORTED AS UNKNOWN. Manufacturer Narrative: D4: CO…	OS	Physician	10/07/2022	2022	23	Female
https://www.accessdata.fda.gov/scripts/cdrh/cfdocs/cfMAUDE/Detail.CFM?MDRFOI__ID=15849481&pc=MTA	2023826-2022-04262	2022-09-01 04:00:00	Injury	STAAR SURGICAL COMPANY	2022-11-22 05:00:00	MTA	IMPLANTABLE COLLAMER LENS (ICL)	Misfocusing	Blurred Vision	P030016	Event Description: THE REPORTER INDICATED THAT A 13.2MM VICM5 13.2 IMPLANTABLE COLLAMER LENS OF -14.0 DIOPTER WAS IMPLANTED INTO THE PATIENTS RIGHT EYE (OD) ON (B)(6) 2022. REFRACTIVE SURPRISE WAS OBSERVED. THE LENS REMAINS IMPLANTED. NO FURTHER INFORMATION HAS BEEN PROVIDED. ATTEMPTS TO OBTAIN ADDITIONAL INFORMATION HAVE NOT BEEN SUCCESSFUL. IF ADDITIONAL INFORMATION IS RECEIVED A SUPPLEMENTAL M…	OD	Physician	10/25/2022	2022	23	Female
https://www.accessdata.fda.gov/scripts/cdrh/cfdocs/cfMAUDE/Detail.CFM?MDRFOI__ID=15937239&pc=MTA	2023826-2022-04285	2022-09-07 04:00:00	Injury	STAAR SURGICAL COMPANY	2022-12-07 05:00:00	MTA	IMPLANTABLE COLLAMER LENS (ICL)	Misfocusing	Blurred Vision	P030016	Event Description: THE REPORTER INDICATED THAT A 12.6MM VICM5 12.6 OF -8.50 DIOPTER WAS IMPLANTED INTO THE PATIENT'S RIGHT EYE (OD) ON (B)(6) 2022. LENS TEAR/BREAK DURING INJECTION/DELIVERY INTO THE EYE WAS REPORTED AND REFRACTIVE SURPRISE. ON (B)(6) 2022 THE LENS WAS EXCHANGED FOR A SAME MODEL AND SIZE LENS BUT A DIFFERENT DIOPTER. THE REPLACEMENT LENS RESOLVED THE PROBLEM. Manufacturer Narrativ…	OD	Physician	11/07/2022	2022	40	Male
https://www.accessdata.fda.gov/scripts/cdrh/cfdocs/cfMAUDE/Detail.CFM?MDRFOI__ID=15577434&pc=MTA	2023826-2022-03585	2022-09-12 04:00:00	Injury	STAAR SURGICAL COMPANY	2022-10-11 04:00:00	MTA	IMPLANTABLE COLLAMER LENS (ICL)	Misfocusing	Blurred Vision	P030016	Event Description: THE REPORTER INDICATED THAT THE SURGEON IMPLANTED A 13.2MM VICMO13.2; -7.5 DIOPTER IMPLANTABLE COLLAMER LENS INTO THE PATIENT'S LEFT EYE (OS) ON (B)(6) 2022. THE SURGEON REPORTS REFRACTIVE SURPRISE DURING THE POSTOPERATIVE EXAMINATION WITH THE PATIENT. ON (B)(6) 2022 THE SURGEON EXCHANGED THE LENS WITH A SAME LENGTH/MODEL/POWER LENS AND THIS RESOLVED THE PROBLEM. THE SURGEON SU…	OS	Physician	09/19/2022	2022	41	Female
https://www.accessdata.fda.gov/scripts/cdrh/cfdocs/cfMAUDE/Detail.CFM?MDRFOI__ID=16301418&pc=MTA	2023826-2023-00379	2022-09-13 04:00:00	Injury	STAAR SURGICAL COMPANY	2023-02-04 05:00:00	MTA	IMPLANTABLE COLLAMER LENS (ICL)	Misfocusing	Blurred Vision	P030016	Event Description: THE REPORTER INDICATED THAT A 12.6MM VICMO12.6 IMPLANTABLE COLLAMER LENS OF -12.5 DIOPTER WAS IMPLANTED IN THE PATIENT'S LEFT EYE (OS) ON (B)(6) 2022. ON (B)(6) 2022, THE LENS WAS EXCHANGED FOR A TORIC MODEL, SAME SIZE LENS DUE TO REFRACTIVE SURPRISE. THE PROBLEM WAS RESOLVED. CAUSE OF THE EVENT IS UNKNOWN. Manufacturer Narrative: ADDITIONAL INFORMATION: D9: LENS RETURNED 20-FE…	OS	Physician	01/09/2023	2023	27	Female
https://www.accessdata.fda.gov/scripts/cdrh/cfdocs/cfMAUDE/Detail.CFM?MDRFOI__ID=16154822&pc=MTA	2023826-2023-00129	2022-09-15 04:00:00	Injury	STAAR SURGICAL COMPANY	2023-01-12 05:00:00	MTA	IMPLANTABLE COLLAMER LENS (ICL)	Misfocusing	Blurred Vision	P030016	Event Description: THE REPORTER INDICATED THAT A 12.1MM VICM5 12.1 IMPLANTABLE COLLAMER LENS OF -10.00 DIOPTER WAS IMPLANTED INTO THE PATIENT'S LEFT EYE (OS) ON (B)(6) 2021. REFRACTIVE SURPRISE WAS OBSERVED. ON (B)(6) 2022, THE LENS WAS EXCHANGED FOR A SAME MODE AND SIZE BUT DIFFERENT DIOPTER LENS. THE REPLACEMENT LENS RESOLVED THE PROBLEM. CAUSE REPORTED AS USER ERROR. DEVICE DID NOT FAIL TO PER…	OS	Physician	12/13/2022	2022	31	Female
https://www.accessdata.fda.gov/scripts/cdrh/cfdocs/cfMAUDE/Detail.CFM?MDRFOI__ID=16154821&pc=MTA	2023826-2023-00131	2022-09-29 04:00:00	Injury	STAAR SURGICAL COMPANY	2023-01-12 05:00:00	MTA	IMPLANTABLE COLLAMER LENS (ICL)	Misfocusing	Blurred Vision	P030016	Event Description: THE REPORTER INDICATED THAT A 12.1MM VICM5 12.1 IMPLANTABLE COLLAMER LENS OF -7.00 DIOPTER WAS IMPLANTED INTO THE PATIENT'S LEFT EYE (OS) ON (B)(6) 2022 . REFRACTIVE SURPRISE WAS OBSERVED. ON (B)(6) 2022, THE LENS WAS EXCHANGED FOR A SAME MODEL AND SIZE BUT DIFFERENT DIOPTER LENS. THE REPLACEMENT LENS RESOLVED THE PROBLEM. CAUSE REPORTED AS USER ERROR. DEVICE DID NOT FAIL TO PE…	OS	Physician	12/13/2022	2022	36	Male
https://www.accessdata.fda.gov/scripts/cdrh/cfdocs/cfMAUDE/Detail.CFM?MDRFOI__ID=16414710&pc=MTA	2023826-2023-00520	2022-10-08 04:00:00	Injury	STAAR SURGICAL COMPANY	2023-02-21 05:00:00	MTA	IMPLANTABLE COLLAMER LENS (ICL)	Misfocusing	Blurred Vision	P030016	Event Description: THE REPORTER INDICATED THAT A 12.1MM VICM512.1 IMPLANTABLE COLLAMER LENS OF A -6.5 DIOPTER WAS IMPLANTED INTO THE PATIENT'S LEFT EYE (OS) ON (B)(6) 2022. ON (B)(6) 2023, THE LENS WAS REPLACED FOR A TORIC LENS DUE TO REFRACTIVE SURPRISE. THE PROBLEM WAS RESOLVED. THE CAUSE OF THE EVENT IS UNKNOWN. REPORTEDLY, "POSTOPERATIVELY, THE PATIENT HAS DIFFICULTY OPENING HER EYES EVEN AFT…	OS	Physician	01/23/2023	2023	42	Female
https://www.accessdata.fda.gov/scripts/cdrh/cfdocs/cfMAUDE/Detail.CFM?MDRFOI__ID=16828266&pc=MTA	2023826-2023-01532	2022-10-08 04:00:00	Injury	STAAR SURGICAL COMPANY	2023-04-27 04:00:00	MTA	IMPLANTABLE COLLAMER LENS (ICL)	Misfocusing	Blurred Vision	P030016	Event Description: THE REPORTER INDICATED THAT A 13.2MM VICMO13.2 IMPLANTABLE COLLAMER LENS OF -7.0 DIOPTER WAS IMPLANTED INTO THE PATIENT'S LEFT EYE (OS) ON (B)(6) 2022. THE LENS WAS LATER EXCHANGED FOR A TORIC LENS OF THE SAME LENGTH AND THE PROBLEM RESOLVED. CAUSE OF EVENT WAS UNKNOWN. Manufacturer Narrative: H6 - TYPE OF INVESTIGATION - LENS WORK ORDER SEARCH: NO SIMILAR COMPLAINT TYPE EVENTS…	OS	Physician	03/31/2023	2023	31	Male
https://www.accessdata.fda.gov/scripts/cdrh/cfdocs/cfMAUDE/Detail.CFM?MDRFOI__ID=17338886&pc=MTA	2023826-2023-02982	2022-10-12 04:00:00	Injury	STAAR SURGICAL COMPANY	2023-07-17 04:00:00	MTA	IMPLANTABLE COLLAMER LENS (ICL)	Misfocusing	Blurred Vision	P030016	Event Description: THE REPORTER INDICATED THAT THE SURGEON IMPLANTED A 12.1MM VICM5_12.1; -09.00 DIOPTER IMPLANTABLE COLLAMER LENS INTO THE PATIENT'S RIGHT EYE (OD) ON (B)(6) 2022. IT WAS REPORTED THE PATIENT HAD VISUAL ACUITY DISSATISFACTION. ON (B)(6) 2023 THE LENS WAS EXCHANGED WITH A SAME LENGTH BUT DIFFERENT MODEL/POWER LENS AND THIS RESOLVED THE PROBLEM. Manufacturer Narrative: H6 - TYPE OF…	OD	Physician	07/12/2023	2023	40
https://www.accessdata.fda.gov/scripts/cdrh/cfdocs/cfMAUDE/Detail.CFM?MDRFOI__ID=16344588&pc=MTA	2023826-2023-00474	2022-11-09 05:00:00	Injury	STAAR SURGICAL COMPANY	2023-02-09 05:00:00	MTA	IMPLANTABLE COLLAMER LENS (ICL)	Misfocusing	Blurred Vision	P030016	Event Description: THE REPORTER INDICATED THAT A 12.6MM VICM512.6 IMPLANTABLE COLLAMER LENS OF A -9.0 DIOPTER WAS IMPLANTED INTO THE PATIENT'S LEFT EYE (OS) ON (B)(6) 2022. ON (B)(6) 2022, THE LENS WAS EXCHANGED FOR A REPLACEMENT LENS DUE TO REFRACTIVE SURPRISE. THE PROBLEM WAS RESOLVED. THE CAUSE OF THE EVENT IS UNKNOWN. Manufacturer Narrative: DEVICE EVALUATION: H3 - TYPE OF INVESTIGATION CODE:…	OS	Physician	01/12/2023	2023	29	Male
https://www.accessdata.fda.gov/scripts/cdrh/cfdocs/cfMAUDE/Detail.CFM?MDRFOI__ID=16356403&pc=MTA	2023826-2023-00475	2022-11-09 05:00:00	Injury	STAAR SURGICAL COMPANY	2023-02-10 05:00:00	MTA	IMPLANTABLE COLLAMER LENS (ICL)	Misfocusing	Blurred Vision	P030016	Event Description: THE REPORTER INDICATED THAT A 12.6MM VICM512.6 IMPLANTABLE COLLAMER LENS OF A -8.5 DIOPTER WAS IMPLANTED INTO THE PATIENT'S RIGHT EYE (OD) ON (B)(6) 2022. ON (B)(6) 2022, THE LENS WAS EXCHANGED FOR A REPLACEMENT LENS DUE TO REFRACTIVE SURPRISE. THE PROBLEM WAS RESOLVED. THE CAUSE OF THE EVENT IS UNKNOWN. Manufacturer Narrative: DEVICE EVALUATION: H3 - TYPE OF INVESTIGATION CODE…	OD	Physician	01/12/2023	2023	29	Male
https://www.accessdata.fda.gov/scripts/cdrh/cfdocs/cfMAUDE/Detail.CFM?MDRFOI__ID=16464988&pc=MTA	2023826-2023-00719	2022-12-02 05:00:00	Injury	STAAR SURGICAL COMPANY	2023-03-01 05:00:00	MTA	IMPLANTABLE COLLAMER LENS (ICL)	Misfocusing	Blurred Vision	P030016	Event Description: THE REPORTER INDICATED THAT A 12.6MM VICMO12.6 IMPLANTABLE COLLAMER LENS OF -3.5 DIOPTER WAS IMPLANTED IN THE PATIENT'S RIGHT EYE (OD) ON (B)(6) 2022. ON (B)(6) 2022, THE LENS WAS EXCHANGED FOR A SAME SIZE LENS DUE TO REFRACTIVE SURPRISE. THE PROBLEM WAS RESOLVED. CAUSE OF THE EVENT IS UNKNOWN. Manufacturer Narrative: H3 - DEVICE EVALUATION: THE LENS WAS RETURNED DRY WITH RESID…	OD	Physician	01/31/2023	2023	29	Male
https://www.accessdata.fda.gov/scripts/cdrh/cfdocs/cfMAUDE/Detail.CFM?MDRFOI__ID=16150999&pc=MTA	2023826-2023-00139	2022-12-08 05:00:00	Injury	STAAR SURGICAL COMPANY	2023-01-12 05:00:00	MTA	IMPLANTABLE COLLAMER LENS (ICL)	Misfocusing	Blurred Vision	P030016	Event Description: THE REPORTER INDICATED THAT THE SURGEON IMPLANTED A 12.6MM VICM5_12.6; -3.50 DIOPTER IMPLANTABLE COLLAMER LENS INTO THE PATIENT'S LEFT EYE (OS) ON (B)(6) 2022. THE PATIENT EXPERIENCED REFRACTIVE SURPRISE. ON (B)(6) 2022 THE LENS WAS EXCHANGED WITH A SAME LENGTH BUT DIFFERENT POWER LENS. THIS RESOLVED THE PROBLEM. THE CAUSE OF THE EVENT WAS REPORTED AS UNKNOWN. Manufacturer Narr…	OS	Physician	01/09/2023	2023	26	Female
https://www.accessdata.fda.gov/scripts/cdrh/cfdocs/cfMAUDE/Detail.CFM?MDRFOI__ID=17119689&pc=MTA	2023826-2023-02165	2022-12-25 05:00:00	Malfunction	STAAR SURGICAL COMPANY	2023-06-13 04:00:00	MTA	IMPLANTABLE COLLAMER LENS (ICL)	Misfocusing	Blurred Vision	P030016	Event Description: THE REPORTER INDICATED THAT THE SURGEON IMPLANTED A 12.6MM VICM6 12.6, -11.0 DIOPTER, IMPLANTABLE COLLAMER LENS INTO THE PATIENT'S RIGHT EYE (OD) ON 27/NOV/2023. REFRACTIVE SURPRISE WAS OBSERVED. LENS REMAINS IMPLANTED. THE CAUSE OF THE EVENT WAS REPORTED AS UNKNOWN. REPORTEDLY, LENS MAYBE EXCHANGED. Manufacturer Narrative: A4 - UNK A5 - UNK A6 - UNK H6 - WORK ORDER SEARCH: NO …	OD	Physician	05/24/2023	2023	50	Male
https://www.accessdata.fda.gov/scripts/cdrh/cfdocs/cfMAUDE/Detail.CFM?MDRFOI__ID=17119700&pc=MTA	2023826-2023-02166	2022-12-25 05:00:00	Malfunction	STAAR SURGICAL COMPANY	2023-06-13 04:00:00	MTA	IMPLANTABLE COLLAMER LENS (ICL)	Misfocusing	Blurred Vision	P030016	Event Description: THE REPORTER INDICATED THAT THE SURGEON IMPLANTED A 12.6MM VICM6 12.6, -08.50 DIOPTER, IMPLANTABLE COLLAMER LENS INTO THE PATIENT'S LEFT EYE (OS) ON (B)(6) 2023. REFRACTIVE SURPRISE WAS OBSERVED. LENS REMAINS IMPLANTED. THE CAUSE OF THE EVENT WAS REPORTED AS UNKNOWN. REPORTEDLY, LENS MAYBE EXCHANGED. Manufacturer Narrative: H6 - WORK ORDER SEARCH: NO SIMILAR COMPLAINT TYPE EVEN…	OS	Physician	05/24/2023	2023	50	Male
https://www.accessdata.fda.gov/scripts/cdrh/cfdocs/cfMAUDE/Detail.CFM?MDRFOI__ID=16250313&pc=MTA	2023826-2023-00320	2023-01-04 05:00:00	Malfunction	STAAR SURGICAL COMPANY	2023-01-26 05:00:00	MTA	IMPLANTABLE COLLAMER LENS (ICL)	Misfocusing	Blurred Vision	P030016	Event Description: THE REPORTER INDICATED THAT THE SURGEON IMPLANTED A 13.2MM VICM6_13.2; -9.50 DIOPTER IMPLANTABLE COLLAMER LENS INTO THE PATIENT'S LEFT EYE (OS) ON (B)(6) 2022. THE PATIENT EXPERIENCED REFRACTIVE SURPRISE. IT WAS ADDITIONALLY NOTED "PATIENT HAPPY WITH DISTANCE VISION BUT DISSATISFIED WITH INTERMEDIATE AND NEAR VISION". LENS REMAINS IMPLANTED. THE PROBLEM IS NOT RESOLVED. CAUSE O…	OS	Physician	01/05/2023	2023	47	Female
https://www.accessdata.fda.gov/scripts/cdrh/cfdocs/cfMAUDE/Detail.CFM?MDRFOI__ID=16250339&pc=MTA	2023826-2023-00319	2023-01-04 05:00:00	Malfunction	STAAR SURGICAL COMPANY	2023-01-26 05:00:00	MTA	IMPLANTABLE COLLAMER LENS (ICL)	Misfocusing	Blurred Vision	P030016	Event Description: THE REPORTER INDICATED THAT THE SURGEON IMPLANTED A 13.2MM VICM6_13.2; -10.00 DIOPTER IMPLANTABLE COLLAMER LENS INTO THE PATIENT'S RIGHT EYE (OD) ON (B)(6) 2022. THE PATIENT EXPERIENCED REFRACTIVE SURPRISE; IT WAS ADDITIONALLY NOTED "PATIENT HAPPY WITH DISTANCE VISION BUT DISSATISFIED WITH INTERMEDIATE AND NEAR VISION. LENS REMAINS IMPLANTED. THE PROBLEM IS NOT RESOLVED. THE CA…	OD	Physician	01/05/2023	2023	47	Female
https://www.accessdata.fda.gov/scripts/cdrh/cfdocs/cfMAUDE/Detail.CFM?MDRFOI__ID=17121541&pc=MTA	2023826-2023-02331	2023-01-10 05:00:00	Injury	STAAR SURGICAL COMPANY	2023-06-13 04:00:00	MTA	IMPLANTABLE COLLAMER LENS (ICL)	Misfocusing	Blurred Vision	P030016	Event Description: THE REPORTER INDICATED THAT THE SURGEON IMPLANTED A 12.6MM VICMO12.6; -13.5 DIOPTER IMPLANTABLE COLLAMER LENS INTO THE PATIENT'S LEFT EYE (OS) (B)(6) 2023. THE PATIENT EXPERIENCED BLURRED VISION WITH VISION QUALITY ISSUES. ON (B)(6) 2023 THE LENS WAS EXCHANGED WITH A SAME LENGTH BUT DIFFERENT MODEL/POWER LENS AND THIS RESOLVED THE PROBLEM. THE CAUSE OF THE EVENT WAS REPORTED AS…	OS	Physician	06/09/2023	2023	38	Female
https://www.accessdata.fda.gov/scripts/cdrh/cfdocs/cfMAUDE/Detail.CFM?MDRFOI__ID=16281081&pc=MTA	2023826-2023-00403	2023-01-15 05:00:00	Injury	STAAR SURGICAL COMPANY	2023-02-01 05:00:00	MTA	IMPLANTABLE COLLAMER LENS (ICL)	Misfocusing	Blurred Vision	P030016	Event Description: THE REPORTER INDICATED THAT THE SURGEON IMPLANTED A 13.2MM VICMO13.2; -5.5 DIOPTER IMPLANTABLE COLLAMER LENS INTO THE PATIENT'S LEFT EYE (OS) ON (B)(6) 2022. THE SURGEON REPORTS TRANSIENT LOSS OF BCVA. ON (B)(6) 2023 THE LENS WAS EXCHANGED WITH A SHORTER LENGTH LENS AND DIFFERENT MODEL LENS. THIS RESOLVED THE PROBLEM. THE CAUSE OF THE EVENT WAS REPORTED AS "OTHER" AND NOTED; "D…	OS	Physician	01/31/2023	2023	33	Female
https://www.accessdata.fda.gov/scripts/cdrh/cfdocs/cfMAUDE/Detail.CFM?MDRFOI__ID=16281082&pc=MTA	2023826-2023-00395	2023-01-15 05:00:00	Injury	STAAR SURGICAL COMPANY	2023-02-01 05:00:00	MTA	IMPLANTABLE COLLAMER LENS (ICL)	Misfocusing	Blurred Vision	P030016	Event Description: THE REPORTER INDICATED THAT THE SURGEON IMPLANTED A 13.2MM VICMO13.2; -6.0 DIOPTER IMPLANTABLE COLLAMER LENS INTO THE PATIENT'S RIGHT EYE (OD) ON (B)(6) 2022. THE SURGEON REPORTS TRANSIENT LOSS OF BCVA. ON (B)(6) 2023 THE LENS WAS EXCHANGED WITH A SHORTER LENGTH LENS AND DIFFERENT MODEL LENS. THIS RESOLVED THE PROBLEM. THE CAUSE OF THE EVENT WAS REPORTED AS "OTHER" AND NOTED; "…	OD	Physician	01/31/2023	2023	33	Female
https://www.accessdata.fda.gov/scripts/cdrh/cfdocs/cfMAUDE/Detail.CFM?MDRFOI__ID=16678113&pc=MTA	2023826-2023-01214	2023-01-24 05:00:00	Injury	STAAR SURGICAL COMPANY	2023-04-04 04:00:00	MTA	IMPLANTABLE COLLAMER LENS (ICL)	Misfocusing	Blurred Vision	P030016	Event Description: THE REPORTER INDICATED THAT THE SURGEON IMPLANTED A 12.6MM VICM5_12.6; -2.75 DIOPTER IMPLANTABLE COLLAMER LENS INTO THE PATIENT'S LEFT EYE (OS) ON (B)(6) 2023. THE PATIENT EXPERIENCED REFRACTIVE SURPRISE. LENS REMAINS IMPLANTED. THE CAUSE OF THE EVENT WAS REPORTED AS UNKNOWN. IF ADDITIONAL INFORMATION IS RECEIVED A SUPPLEMENTAL MEDWATCH REPORT WILL BE SUBMITTED. Manufacturer Na…	OS	Physician	03/20/2023	2023	42	Female
https://www.accessdata.fda.gov/scripts/cdrh/cfdocs/cfMAUDE/Detail.CFM?MDRFOI__ID=16892521&pc=MTA	2023826-2023-01748	2023-02-07 05:00:00	Injury	STAAR SURGICAL COMPANY	2023-05-08 04:00:00	MTA	IMPLANTABLE COLLAMER LENS (ICL)	Misfocusing	Blurred Vision	P030016	Event Description: THE REPORTER INDICATED THAT A 12.6MM VICMO12.6 IMPLANTABLE COLLAMER LENS OF -5.00 DIOPTER WAS IMPLANTED INTO THE PATIENT'S RIGHT EYE (OD) ON (B)(6) 2022. ON (B)(6) 2023 THE LENS WAS EXCHANGED FOR A TORIC LENS DUE TO REFRACTIVE SURPRISE. THE EXCHANGE RESOLVED THE PROBLEM. CAUSE OF EVENT WAS UNKNOWN. Manufacturer Narrative: H6 - TYPE OF INVESTIGATION - LENS WORK ORDER SEARCH: NO …	OD	Physician	04/09/2023	2023	28	Male
https://www.accessdata.fda.gov/scripts/cdrh/cfdocs/cfMAUDE/Detail.CFM?MDRFOI__ID=17131352&pc=MTA	2023826-2023-02389	2023-02-09 05:00:00	Injury	STAAR SURGICAL COMPANY	2023-06-14 04:00:00	MTA	IMPLANTABLE COLLAMER LENS (ICL)	Misfocusing	Blurred Vision	P030016	Event Description: THE REPORTER INDICATED THAT THE SURGEON IMPLANTED A 13.2MM VICM5_13.2; -7.50 DIOPTER IMPLANTABLE COLLAMER LENS INTO THE PATIENT'S RIGHT EYE (OD) ON (B)(6) 2023. THE PATIENT EXPERIENCED REFRACTIVE SURPRISE. THE SURGEON PERFORMED REFRACTIVE TREATMENT (LASIK/PRK/ETC). THIS RESOLVED THE PROBLEM. IT WAS ADDITIONALLY NOTED "ALL IS FINE AND PATIENT IS HAPPY, LASER TOUCH UP TREATMENT O…	OD	Physician	06/05/2023	2023	39	Female
https://www.accessdata.fda.gov/scripts/cdrh/cfdocs/cfMAUDE/Detail.CFM?MDRFOI__ID=17066600&pc=MTA	2023826-2023-02225	2023-02-10 05:00:00	Injury	STAAR SURGICAL COMPANY	2023-06-05 04:00:00	MTA	IMPLANTABLE COLLAMER LENS (ICL)	Misfocusing	Blurred Vision	P030016	Event Description: THE REPORTER INDICATED THAT THE SURGEON IMPLANTED A 12.1MM VICM5_12.1; -8.50 DIOPTER IMPLANTABLE COLLAMER LENS INTO THE PATIENT'S RIGHT EYE (OD) ON (B)(6) 2023. THE PATIENT EXPERIENCED REFRACTIVE SURPRISE. ON (B)(6) 2023 THE LENS WAS EXPLANTED. ON THIS SAME DATE IN A SEPARATE SURGERY A REPLACEMENT LENS OF THE SAME LENGTH, BUT DIFFERENT MODEL/POWER WAS IMPLANTED AND THIS RESOLVE…	OD	Physician	05/26/2023	2023	22	Female
https://www.accessdata.fda.gov/scripts/cdrh/cfdocs/cfMAUDE/Detail.CFM?MDRFOI__ID=16792960&pc=MTA	2023826-2023-01479	2023-02-11 05:00:00	Injury	STAAR SURGICAL COMPANY	2023-04-23 04:00:00	MTA	IMPLANTABLE COLLAMER LENS (ICL)	Misfocusing	Blurred Vision	P030016	Event Description: THE REPORTER INDICATED THAT A 13.2MM VICMO13.2 IMPLANTABLE COLLAMER LENS OF -11.5 DIOPTER WAS IMPLANTED IN THE PATIENT'S RIGHT EYE (OD) ON (B)(6) 2023. ON (B)(6) 2023, THE LENS WAS EXCHANGED DUE TO REFRACTIVE SURPRISE. THE PROBLEM WAS RESOLVED. CAUSE OF THE EVENT IS UNKNOWN. REPORTEDLY, "BEFORE REPLACING THE FIRST LENS, THE DOCTOR PERFORMED LENS ALIGNMENT AND ROTATION IN THE EY…	OD	Physician	03/29/2023	2023	37	Female
https://www.accessdata.fda.gov/scripts/cdrh/cfdocs/cfMAUDE/Detail.CFM?MDRFOI__ID=16678778&pc=MTA	2023826-2023-01178	2023-02-14 05:00:00	Injury	STAAR SURGICAL COMPANY	2023-04-04 04:00:00	MTA	IMPLANTABLE COLLAMER LENS (ICL)	Misfocusing	Blurred Vision	P030016	Event Description: THE REPORTER INDICATED THAT A 12.6MM VICM512.6 IMPLANTABLE COLLAMER LENS OF A -5.50 DIOPTER WAS IMPLANTED INTO THE PATIENT'S RIGHT EYE (OD) ON (B)(6) 2023. ON (B)(6) 2023, THE LENS WAS REMOVED DUE TO REFRACTIVE SURPRISE. THE PROBLEM WAS RESOLVED. Manufacturer Narrative: ADDITIONAL INFORMATION: H6 - TYPE OF INVESTIGATION 3331 - DEVICE HISTORY RECORD (DHR) REVIEW: BASED ON THE RE…	OD	Physician	03/06/2023	2023	21	Female
https://www.accessdata.fda.gov/scripts/cdrh/cfdocs/cfMAUDE/Detail.CFM?MDRFOI__ID=17696360&pc=MTA	2023826-2023-03777	2023-02-14 05:00:00	Injury	STAAR SURGICAL COMPANY	2023-09-07 04:00:00	MTA	IMPLANTABLE COLLAMER LENS (ICL)	Misfocusing	Blurred Vision	P030016	Event Description: THE REPORTER INDICATED THAT A 13.2MM VICMO13.2 IMPLANTABLE COLLAMER LENS OF -5.0 DIOPTER WAS IMPLANTED INTO THE PATIENT'S LEFT EYE (OS) ON (B)(6) 2023. ON (B)(6) 2023 THE LENS WAS EXCHANGED FOR TORIC LENS OF DIFFERENT POWER DUE TO REFRACTIVE SURPRISE. THE EXCHANGE RESOLVED THE PROBLEM. CAUSE OF EVENT WAS UNKNOWN. Manufacturer Narrative: H3: DEVICE EVALUATION: LENS WAS RETURNED …	OS	Physician	08/10/2023	2023	25	Female
https://www.accessdata.fda.gov/scripts/cdrh/cfdocs/cfMAUDE/Detail.CFM?MDRFOI__ID=17971404&pc=MTA	2023826-2023-04572	2023-02-17 05:00:00	Injury	STAAR SURGICAL COMPANY	2023-10-19 04:00:00	MTA	IMPLANTABLE COLLAMER LENS (ICL)	Misfocusing	Blurred Vision	P030016	Event Description: THE REPORTER INDICATED THAT A 13.2MM VICM513.2 IMPLANTABLE COLLAMER LENS OF -11.0 DIOPTER WAS IMPLANTED IN THE PATIENT'S RIGHT EYE (OD) ON (B)(6) 2023. ON (B)(6) 2023, THE LENS WAS REMOVED DUE TO REFRACTIVE SUPRISE. ON (B)(6) 2023, A REPLACEMENT LENS WAS IMPLANTED AND THE PROBLEM WAS RESOLVED. CAUSE OF THE EVENT IS OTHER. Manufacturer Narrative: A4-A6:UNK. H6: WORK ORDER SEARCH…	OD	Physician	10/13/2023	2023	37	Male
https://www.accessdata.fda.gov/scripts/cdrh/cfdocs/cfMAUDE/Detail.CFM?MDRFOI__ID=17992929&pc=MTA	2023826-2023-04742	2023-02-18 05:00:00	Injury	STAAR SURGICAL COMPANY	2023-10-23 04:00:00	MTA	IMPLANTABLE COLLAMER LENS (ICL)	Misfocusing	Blurred Vision	P030016	Event Description: THE REPORTER INDICATED THAT A 12.6MM, VICM5_12.6, -5.0 DIOPTER, IMPLANTABLE COLLAMER LENS WAS IMPLANTED INTO THE PATIENTS RIGHT EYE (OD) ON (B)(6) 2023. ON (B)(6) 2023 THE LENS WAS EXCHANGED FOR A DIFFERENT DIOPTER LENS AND THE PROBLEM RESOLVED. CAUSE OF EVENT WAS UNKNOWN. Manufacturer Narrative: TYPE OF INVESTIGATION - LENS WORK ORDER SEARCH: NO SIMILAR COMPLAINT TYPE EVENTS R…	OD	Physician	09/28/2023	2023	23	Female
https://www.accessdata.fda.gov/scripts/cdrh/cfdocs/cfMAUDE/Detail.CFM?MDRFOI__ID=16748688&pc=MTA	2023826-2023-01354	2023-03-01 05:00:00	Injury	STAAR SURGICAL COMPANY	2023-04-16 04:00:00	MTA	IMPLANTABLE COLLAMER LENS (ICL)	Misfocusing	Blurred Vision	P030016	Event Description: THE REPORTER INDICATED THAT A 13.2MM VICMO13.2 IMPLANTABLE COLLAMER LENS OF -10.00 DIOPTER WAS IMPLANTED INTO THE PATIENT'S LEFT EYE (OS) ON (B)(6) 2022. ON (B)(6) 2023THE LENS WAS EXCHANGED FOR A TORIC LENS DUE TO REFRACTIVE SURPRISE. THE EXCHANGE RESOLVED THE PROBLEM. CAUSE OF EVENT WAS UNKNOWN. Manufacturer Narrative: H6- DEVICE EVALUATION: LENS WAS RETURNED DRY WITH RESIDUE…	OS	Physician	03/17/2023	2023	31	Female
https://www.accessdata.fda.gov/scripts/cdrh/cfdocs/cfMAUDE/Detail.CFM?MDRFOI__ID=16746899&pc=MTA	2023826-2023-01350	2023-03-14 04:00:00	Injury	STAAR SURGICAL COMPANY	2023-04-14 04:00:00	MTA	IMPLANTABLE COLLAMER LENS (ICL)	Misfocusing	Blurred Vision	P030016	Event Description: THE REPORTER INDICATED THAT A 13.2MM, VICM5_13.2, -6.50 DIOPTER, IMPLANTABLE COLLAMER LENS WAS IMPLANTED INTO THE PATIENTS LEFT EYE (OS) ON (B)(6) 2022. THE PATIENT EXPERIENCED REFRACTIVE SURPRISE. LENS REMAINS IMPLANTED. CAUSE OF EVENT WAS UNKNOWN. IF ADDITIONAL INFORMATION IS RECEIVED A SUPPLEMENTAL MEDWATCH REPORT WILL BE SUBMITTED. Manufacturer Narrative: B5- PER UPDATED IN…	OS	Physician	03/15/2023	2023	34	Male
https://www.accessdata.fda.gov/scripts/cdrh/cfdocs/cfMAUDE/Detail.CFM?MDRFOI__ID=17761001&pc=MTA	2023826-2023-04001	2023-03-17 04:00:00	Injury	STAAR SURGICAL COMPANY	2023-09-15 04:00:00	MTA	IMPLANTABLE COLLAMER LENS (ICL)	Misfocusing	Blurred Vision	P030016	Event Description: THE REPORTER INDICATED THAT A 12.1MM VICM512.1 IMPLANTABLE COLLAMER LENS OF A -10.0 DIOPTER WAS IMPLANTED INTO THE PATIENT'S RIGHT EYE (OD) ON (B)(6) 2023. ON (B)(6) 2023, THE LENS WAS EXCHANGED FOR A SAME SIZE LENS DUE TO REFRACTIVE SURPRISE. THE PROBLEM WAS RESOLVED. Manufacturer Narrative: H3: DEVICE EVALUATION: LENS WAS RETURNED IN A MICRO-CENTRIFUGE VIAL, DRY, WITH RESIDUE…	OD	Physician	08/31/2023	2023	40	Male
https://www.accessdata.fda.gov/scripts/cdrh/cfdocs/cfMAUDE/Detail.CFM?MDRFOI__ID=16810401&pc=MTA	2023826-2023-01482	2023-03-20 04:00:00	Injury	STAAR SURGICAL COMPANY	2023-04-25 04:00:00	MTA	IMPLANTABLE COLLAMER LENS (ICL)	Misfocusing	Blurred Vision	P030016	Event Description: THE REPORTER INDICATED THAT A 13.2MM VICM513.2 IMPLANTABLE COLLAMER LENS OF A -9.0 DIOPTER WAS IMPLANTED INTO THE PATIENT'S LEFT EYE (OS) ON (B)(6) 2023. ON (B)(6) 2023, THE LENS WAS EXCHANGED FOR A REPLACEMENT LENS DUE TO REFRACTIVE SURPRISE. THE PROBLEM WAS RESOLVED. THE CAUSE OF THE EVENT IS UNKNOWN. STATUS OF THE EYE IS REPORTED AS "GOOD". Manufacturer Narrative: H3: DEVICE…	OS	Physician	03/30/2023	2023	36	Male
https://www.accessdata.fda.gov/scripts/cdrh/cfdocs/cfMAUDE/Detail.CFM?MDRFOI__ID=16810453&pc=MTA	2023826-2023-01481	2023-03-20 04:00:00	Injury	STAAR SURGICAL COMPANY	2023-04-25 04:00:00	MTA	IMPLANTABLE COLLAMER LENS (ICL)	Misfocusing	Blurred Vision	P030016	Event Description: THE REPORTER INDICATED THAT A 13.2MM VICM513.2 IMPLANTABLE COLLAMER LENS OF A -6.5 DIOPTER WAS IMPLANTED INTO THE PATIENT'S RIGHT EYE (OD) ON (B)(6) 2023. ON (B)(6) 2023, THE LENS WAS EXCHANGED FOR A REPLACEMENT LENS DUE TO REFRACTIVE SURPRISE. THE PROBLEM WAS RESOLVED. THE CAUSE OF THE EVENT IS UNKNOWN. STATUS OF THE EYE IS REPORTED AS "GOOD." Manufacturer Narrative: H6: WORK …	OD	Physician	03/30/2023	2023	36	Male
https://www.accessdata.fda.gov/scripts/cdrh/cfdocs/cfMAUDE/Detail.CFM?MDRFOI__ID=17592020&pc=MTA	2023826-2023-03620	2023-03-24 04:00:00	Injury	STAAR SURGICAL COMPANY	2023-08-21 04:00:00	MTA	IMPLANTABLE COLLAMER LENS (ICL)	Misfocusing	Blurred Vision	P030016	Event Description: THE REPORTER INDICATED THAT A 13.2MM VICMO13.2 IMPLANTABLE COLLAMER LENS OF A -14.0 DIOPTER WAS IMPLANTED INTO THE PATIENT'S LEFT EYE (OS) ON (B)(6) 2022. ON (B)(6) 2023, THE LENS WAS EXCHANGED FOR A TORIC LENS DUE TO REFRACTIVE SURPRISE AND REFRACTIVE CHANGE OVER TIME. THE PROBLEM WAS RESOLVED. CAUSE OF THE EVENT IS UNKNOWN. Manufacturer Narrative: CORRECTED DATA: A2- " ON (B)…	OS	Physician	08/01/2023	2023	33	Female
https://www.accessdata.fda.gov/scripts/cdrh/cfdocs/cfMAUDE/Detail.CFM?MDRFOI__ID=17954043&pc=MTA	2023826-2023-04567	2023-03-24 04:00:00	Injury	STAAR SURGICAL COMPANY	2023-10-17 04:00:00	MTA	IMPLANTABLE COLLAMER LENS (ICL)	Misfocusing	Blurred Vision	P030016	Event Description: THE REPORTER INDICATED THAT A 13.2MM VICMO13.2 IMPLANTABLE COLLAMER LENS OF -15.5 DIOPTER WAS IMPLANTED INTO THE PATIENT'S RIGHT EYE (OD) ON (B)(6) 2022. ON (B)(6) 2023, THE LENS WAS EXCHANGED FOR A TORIC MODEL LENS DUE TO REFRACTIVE SUPRISE AND REFRACTIVE CHANGE OVERTIME. THE PROBLEM WAS RESOLVED. CAUSE OF THE EVENT IS UNKNOWN. Manufacturer Narrative: CORRECTED DATA: B5: THE R…	OD	Physician	10/09/2023	2023	33	Female
https://www.accessdata.fda.gov/scripts/cdrh/cfdocs/cfMAUDE/Detail.CFM?MDRFOI__ID=17213970&pc=MTA	2023826-2023-02554	2023-03-30 04:00:00	Injury	STAAR SURGICAL COMPANY	2023-06-27 04:00:00	MTA	IMPLANTABLE COLLAMER LENS (ICL)	Misfocusing	Blurred Vision	P030016	Event Description: THE REPORTER INDICATED THAT THE SURGEON IMPLANTED A 12.6MM VICM5_12.6 IMPLANTABLE COLLAMER LENS OF -6.00 DIOPTER INTO THE PATIENT'S RIGHT EYE (OD) ON (B)(6) 2023. ON (B)(6) 2023 THE LENS WAS EXCHANGED FOR A DIFFERENT POWER LENS DUE TO REFRACTIVE SURPRISE AND THE PROBLEM RESOLVED. CAUSE REPORTED AS UNKNOWN. Manufacturer Narrative: ADDITIONAL INFORMATION: D9: RETURN DATE: 14-JUL-…	OD	Physician	05/30/2023	2023		Female
https://www.accessdata.fda.gov/scripts/cdrh/cfdocs/cfMAUDE/Detail.CFM?MDRFOI__ID=17214401&pc=MTA	2023826-2023-02555	2023-03-30 04:00:00	Injury	STAAR SURGICAL COMPANY	2023-06-28 04:00:00	MTA	IMPLANTABLE COLLAMER LENS (ICL)	Misfocusing	Blurred Vision	P030016	Event Description: THE REPORTER INDICATED THAT THE SURGEON IMPLANTED A 12.6MM VICM5_12.6 IMPLANTABLE COLLAMER LENS OF -5.50 DIOPTER INTO THE PATIENT'S LEFT EYE (OS) ON (B)(6) 2023. ON (B)(6) 2023 THE LENS WAS EXCHANGED FOR A DIFFERENT POWER LENS DUE TO REFRACTIVE SURPRISE AND THE PROBLEM RESOLVED. CAUSE REPORTED AS UNKNOWN. Manufacturer Narrative: ADDITIONAL INFORMATION: D9: RETURN DATE: (B)(6) 2…	OS	Physician	05/30/2023	2023		Female
https://www.accessdata.fda.gov/scripts/cdrh/cfdocs/cfMAUDE/Detail.CFM?MDRFOI__ID=16991214&pc=MTA	2023826-2023-01769	2023-04-03 04:00:00	Injury	STAAR SURGICAL COMPANY	2023-05-24 04:00:00	MTA	IMPLANTABLE COLLAMER LENS (ICL)	Misfocusing	Blurred Vision	P030016	Event Description: THE REPORTER INDICATED THAT A 13.2MM, VICMO13.2, -11.50 DIOPTER, IMPLANTABLE COLLAMER LENS WAS IMPLANTED INTO THE PATIENT'S LEFT EYE (OS) ON (B)(6) 2022. ON (B)(6) 2023 THE LENS WAS EXCHANGED WITH A DIFFERENT POWER TORIC LENS DUE TO REFRACTIVE SURPRISE. THE PROBLEM WAS RESOLVED. CAUSE OF THE EVENT IS REPORTED AS UNKNOWN. Manufacturer Narrative: A4 - UNK. A5 - UNK. A6 - UNK. H6 …	OS	Physician	05/04/2023	2023	25	Female
https://www.accessdata.fda.gov/scripts/cdrh/cfdocs/cfMAUDE/Detail.CFM?MDRFOI__ID=17410063&pc=MTA	2023826-2023-03193	2023-04-04 04:00:00	Injury	STAAR SURGICAL COMPANY	2023-07-27 04:00:00	MTA	IMPLANTABLE COLLAMER LENS (ICL)	Misfocusing	Blurred Vision	P030016	Event Description: THE REPORTER INDICATED THAT THE SURGEON IMPLANTED A 12.6MM VICMO12.6; -9.0 DIOPTER IMPLANTABLE COLLAMER LENS INTO THE PATIENT'S LEFT EYE (OS) ON (B)(6) 2023. THE PATIENT EXPERIENCED REFRACTIVE SURPRISE. ON (B)(6) 2023 THE LENS WAS EXCHANGED WITH A SAME LENGTH LENS BUT DIFFERENT POWER AND THIS RESOLVED THE PROBLEM. THE CAUSE OF THE EVENT WAS REPORTED AS UNKNOWN. Manufacturer Nar…	OS	Physician	07/25/2023	2023	24	Male
https://www.accessdata.fda.gov/scripts/cdrh/cfdocs/cfMAUDE/Detail.CFM?MDRFOI__ID=17434430&pc=MTA	2023826-2023-03192	2023-04-09 04:00:00	Injury	STAAR SURGICAL COMPANY	2023-08-01 04:00:00	MTA	IMPLANTABLE COLLAMER LENS (ICL)	Misfocusing	Blurred Vision	P030016	Event Description: THE REPORTER INDICATED THAT A 12.6MM, VICMO 12.6, -4.0 DIOPTER, IMPLANTABLE COLLAMER LENS WAS IMPLANTED INTO THE PATIENT'S LEFT EYE (OS) ON (B)(6) 2022. ON (B)(6) 2023 THE LENS WAS REPLACED WITH A SAME SIZE , DIFFERENT POWER (SPHERE/CYLINDER/AXIS) LENS DUE TO REFRACTIVE SURPRISE. THE PROBLEM WAS RESOLVED. CAUSE OF THE EVENT IS REPORTED AS UNKNOWN. Manufacturer Narrative: DEVICE…	OS	Physician	07/13/2023	2023	34	Male
https://www.accessdata.fda.gov/scripts/cdrh/cfdocs/cfMAUDE/Detail.CFM?MDRFOI__ID=17477568&pc=MTA	2023826-2023-03350	2023-04-10 04:00:00	Injury	STAAR SURGICAL COMPANY	2023-08-08 04:00:00	MTA	IMPLANTABLE COLLAMER LENS (ICL)	Misfocusing	Blurred Vision	P030016	Event Description: THE REPORTER INDICATED THAT A 12.1MM VICM5_12.1 IMPLANTABLE COLLAMER LENS OF -10.50 DIOPTER WAS IMPLANTED INTO THE PATIENT'S RIGHT EYE (OD) ON (B)(6) 2023. PER REPORTER PATIENT WAS DISSATISFIED WITH VA. ON (B)(6) 2023 LENS WAS EXCHANGED FOR TORIC LENS AND THE PROBLEM RESOLVED. Manufacturer Narrative: H6 - TYPE OF INVESTIGATION - LENS WORK ORDER SEARCH: NO SIMILAR COMPLAINT TYPE…	OD	Physician	07/11/2023	2023	24	Male
https://www.accessdata.fda.gov/scripts/cdrh/cfdocs/cfMAUDE/Detail.CFM?MDRFOI__ID=17840230&pc=MTA	2023826-2023-04285	2023-04-12 04:00:00	Injury	STAAR SURGICAL COMPANY	2023-09-28 04:00:00	MTA	IMPLANTABLE COLLAMER LENS (ICL)	Misfocusing	Blurred Vision	P030016	Event Description: THE REPORTER INDICATED THAT A 12.6MM VICM5_12.6 IMPLANTABLE COLLAMER LENS OF -7.50 DIOPTER WAS IMPLANTED INTO THE PATIENT'S LEFT EYE (OS) ON (B)(6) 2023. ON (B)(6) 2023 THE LENS WAS EXCHANGED FOR A DIFFERENT POWER LENS DUE TO REFRACTIVE SURPRISE. THE EXCHANGE RESOLVED THE PROBLEM. CAUSE WAS REPORTED AS UNKNOWN. Manufacturer Narrative: H3 - DEVICE EVALUATION: THE LENS WAS RETURN…	OS	Physician	11/27/2023	2023	30	Female
https://www.accessdata.fda.gov/scripts/cdrh/cfdocs/cfMAUDE/Detail.CFM?MDRFOI__ID=17330141&pc=MTA	2023826-2023-02928	2023-04-14 04:00:00	Injury	STAAR SURGICAL COMPANY	2023-07-14 04:00:00	MTA	IMPLANTABLE COLLAMER LENS (ICL)	Misfocusing	Blurred Vision	P030016	Event Description: THE REPORTER INDICATED THAT THE SURGEON IMPLANTED A 13.7MM VICMO13.7; -6.5 DIOPTER IMPLANTABLE COLLAMER LENS INTO THE PATIENT'S RIGHT EYE (OD) ON (B)(6) 2023. THE PATIENT EXPERIENCED REFRACTIVE SURPRISE. ON (B)(6) 2023 THE LENS WAS EXCHANGED WITH THE SAME LENGTH BUT TORIC LENS/DIFFERENT POWER AND THIS RESOLVED THE PROBLEM. THE CAUSE OF THE EVENT WAS REPORTED AS UNKNOWN. Manufac…	OD	Physician	07/14/2023	2023	35	Female
https://www.accessdata.fda.gov/scripts/cdrh/cfdocs/cfMAUDE/Detail.CFM?MDRFOI__ID=17148654&pc=MTA	2023826-2023-02406	2023-04-26 04:00:00	Injury	STAAR SURGICAL COMPANY	2023-06-16 04:00:00	MTA	IMPLANTABLE COLLAMER LENS (ICL)	Misfocusing	Blurred Vision	P030016	Event Description: THE REPORTER INDICATED THAT THE SURGEON IMPLANTED A 13.2MM VICM5_13.2; -3.00 DIOPTER IMPLANTABLE COLLAMER LENS INTO THE PATIENT'S RIGHT EYE (OD) ON (B)(6)2023. THE PATIENT EXPERIENCED REFRACTIVE CHANGE OVER TIME. ON (B)(6)2023 THE LENS WAS EXPLANTED AND LATER ON THIS DATE REPLACED WITH A SAME LENGTH BUT DIFFERENT POWER LENS AND THIS RESOLVED THE PROBLEM. THE CAUSE OF THE EVENT …	OD	Physician	06/09/2023	2023	53	Male
https://www.accessdata.fda.gov/scripts/cdrh/cfdocs/cfMAUDE/Detail.CFM?MDRFOI__ID=17818024&pc=MTA	2023826-2023-04288	2023-05-12 04:00:00	Injury	STAAR SURGICAL COMPANY	2023-09-26 04:00:00	MTA	IMPLANTABLE COLLAMER LENS (ICL)	Misfocusing	Blurred Vision	P030016	Event Description: THE REPORTER INDICATED THAT THE SURGEON IMPLANTED A 12.6MM VICMO12.6, -10.5 DIOPTER IMPLANTABLE COLLAMER LENS INTO THE PATIENT'S LEFT EYE (OS) ON (B)(6) 2023. THE PATIENT EXPERIENCED REFRACTIVE SURPRISE. ON (B)(6) 2023 THE LENS WAS EXCHANGED WITH A SAME LENGTH BUT DIFFERENT MODEL AND POWER LENS. THIS RESOLVED THE PROBLEM. THE CAUSE OF THE EVENT WAS REPORTED AS UNKNOWN. Manufact…	OS	Physician	09/19/2023	2023	24	Female
https://www.accessdata.fda.gov/scripts/cdrh/cfdocs/cfMAUDE/Detail.CFM?MDRFOI__ID=17477662&pc=MTA	2023826-2023-03352	2023-05-19 04:00:00	Injury	STAAR SURGICAL COMPANY	2023-08-08 04:00:00	MTA	IMPLANTABLE COLLAMER LENS (ICL)	Misfocusing	Blurred Vision	P030016	Event Description: THE REPORTER INDICATED THAT A 13.2MM VICMO13.2 IMPLANTABLE COLLAMER LENS OF -4.0 DIOPTER WAS IMPLANTED INTO THE PATIENT'S LEFT EYE (OS) ON (B)(6) 2023. ON (B)(6) 2023 THE LENS WAS EXPLANTED DUE TO REFRACTIVE SURPRISE AND THE PROBLEM RESOLVED. CAUSE OF EVENT WAS UNKNOWN. Manufacturer Narrative: H6: DEVICE EVALUATION: LENS WAS RETURNED DRY WITH RESIDUE/DEBRIS ON PRODUCT IN A MICR…	OS	Physician	07/11/2023	2023	33	Male
https://www.accessdata.fda.gov/scripts/cdrh/cfdocs/cfMAUDE/Detail.CFM?MDRFOI__ID=17840052&pc=MTA	2023826-2023-04284	2023-05-19 04:00:00	Injury	STAAR SURGICAL COMPANY	2023-09-28 04:00:00	MTA	IMPLANTABLE COLLAMER LENS (ICL)	Misfocusing	Blurred Vision	P030016	Event Description: THE REPORTER INDICATED THAT A 12.1MM VICM5_12.1 IMPLANTABLE COLLAMER LENS OF -7.50 DIOPTER WAS IMPLANTED INTO THE PATIENT'S RIGHT EYE (OD) ON (B)(6) 2023. ON (B)(6) 2023 THE LENS WAS EXCHANGED FOR A DIFFERENT POWER LENS DUE TO REFRACTIVE SURPRISE. THE EXCHANGE RESOLVED THE PROBLEM. CAUSE WAS REPORTED AS UNKNOWN. Manufacturer Narrative: H3: DEVICE EVALUATION: THE LENS WAS RETURN…	OD	Physician	11/13/2023	2023	39	Female
https://www.accessdata.fda.gov/scripts/cdrh/cfdocs/cfMAUDE/Detail.CFM?MDRFOI__ID=18803156&pc=MTA	2023826-2024-00837	2023-05-26 04:00:00	Injury	STAAR SURGICAL COMPANY	2024-02-28 05:00:00	MTA	IMPLANTABLE COLLAMER LENS (ICL)	Misfocusing	Blurred Vision	P030016	Event Description: THE REPORTER INDICATED THAT A 13.2MM VICMO13.2 IMPLANTABLE COLLAMER LENS OF -6.0 DIOPTER WAS IMPLANTED INTO THE PATIENT'S RIGHT EYE (OD) ON (B)(6) 2023. ON (B)(6) 2024, THE LENS WAS EXCHANGED FOR SAME SIZE, DIFFERENT POWER LENS DUE TO REFRACTIVE SURPRISE AND REFRACTIVE CHANGE OVERTIME. THE PROBLEM WAS RESOLVED. CAUSE OF THE EVENT IS UNKNOWN. Manufacturer Narrative: A4: A6:UNK. …	OD	Physician	02/19/2023	2023	22	Male
https://www.accessdata.fda.gov/scripts/cdrh/cfdocs/cfMAUDE/Detail.CFM?MDRFOI__ID=17633295&pc=MTA	2023826-2023-03533	2023-05-29 04:00:00	Injury	STAAR SURGICAL COMPANY	2023-08-28 04:00:00	MTA	IMPLANTABLE COLLAMER LENS (ICL)	Misfocusing	Blurred Vision	P030016	Event Description: THE REPORTER INDICATED THAT A 13.2MM, VICMO 13.2, -4.0 DIOPTER, IMPLANTABLE COLLAMER LENS WAS IMPLANTED INTO THE PATIENT'S RIGHT EYE (OD) ON (B)(6) 2023. ON (B)(6) 2023 THE LENS WAS REPLACED WITH A SAME SIZE , DIFFERENT POWER (SPHERE/CYLINDER/AXIS) LENS DUE TO REFRACTIVE SURPRISE. THE PROBLEM WAS RESOLVED. CAUSE OF THE EVENT IS REPORTED AS UNKNOWN. Manufacturer Narrative: H6 - …	OD	Physician	08/07/2023	2023	36	Male
https://www.accessdata.fda.gov/scripts/cdrh/cfdocs/cfMAUDE/Detail.CFM?MDRFOI__ID=17862008&pc=MTA	2023826-2023-04063	2023-06-09 04:00:00	Injury	STAAR SURGICAL COMPANY	2023-10-03 04:00:00	MTA	IMPLANTABLE COLLAMER LENS (ICL)	Misfocusing	Blurred Vision	P030016	Event Description: THE REPORTER INDICATED THAT THE SURGEON IMPLANTED A 13.2MM VICMO13.2, -07.00 DIOPTER, IMPLANTABLE COLLAMER LENS INTO THE PATIENT'S RIGHT EYE (OD) IN (B)(6) 2021. REFRACTIVE CHANGE OVERTIME AND LOW VAULT WERE OBSERVED(ASSESSED ON (B)(6) 2022) . LENS WAS EXCHANGE WITH A DIFFERENT POWER LENS ON (B)(6) 2023. PROBLEM RESOLVED. CAUSE OF THE EVENT IS REPORTED AS UNKNOWN. Manufacturer …	OD	Physician	09/10/2023	2023	32	Female
https://www.accessdata.fda.gov/scripts/cdrh/cfdocs/cfMAUDE/Detail.CFM?MDRFOI__ID=17455639&pc=MTA	2023826-2023-03219	2023-06-15 04:00:00	Injury	STAAR SURGICAL COMPANY	2023-08-03 04:00:00	MTA	IMPLANTABLE COLLAMER LENS (ICL)	Misfocusing	Blurred Vision	P030016	Event Description: THE REPORTER INDICATED THAT A 13.2MM VICMO13.2 IMPLANTABLE COLLAMER LENS OF -6.0 DIOPTER WAS IMPLANTED INTO THE PATIENT'S LEFT EYE (OS) ON (B)(6) 2023. ON (B)(6) 2023, THE LENS WAS EXCHANGED FOR A TORIC LENS DUE TO BLURRED VISION. THE PROBLEM WAS RESOLVED. THE CAUSE OF THE EVENT IS UNKNOWN. REPORTEDLY, "REPLACE ASTIGMATIC CRYSTALS BASED ON POSTOPERATIVE OPTOMETRY RESULTS." Manu…	OS	Physician	07/17/2023	2023	36	Female
https://www.accessdata.fda.gov/scripts/cdrh/cfdocs/cfMAUDE/Detail.CFM?MDRFOI__ID=17455641&pc=MTA	2023826-2023-03220	2023-06-15 04:00:00	Injury	STAAR SURGICAL COMPANY	2023-08-03 04:00:00	MTA	IMPLANTABLE COLLAMER LENS (ICL)	Misfocusing	Blurred Vision	P030016	Event Description: THE REPORTER INDICATED THAT A 13.2MM VICMO13.2 IMPLANTABLE COLLAMER LENS OF -7.0 DIOPTER WAS IMPLANTED INTO THE PATIENT'S RIGHT EYE (OD) ON (B)(6) 2023. ON (B)(6) 2023, THE LENS WAS EXCHANGED FOR A TORIC LENS DUE TO BLURRED VISION. THE PROBLEM WAS RESOLVED. THE CAUSE OF THE EVENT IS UNKNOWN. REPORTEDLY, "REPLACE ASTIGMATIC CRYSTALS BASED ON POSTOPERATIVE OPTOMETRY RESULTS." Man…	OD	Physician	07/17/2023	2023	36	Female
https://www.accessdata.fda.gov/scripts/cdrh/cfdocs/cfMAUDE/Detail.CFM?MDRFOI__ID=17358296&pc=MTA	2023826-2023-02969	2023-06-17 04:00:00	Malfunction	STAAR SURGICAL COMPANY	2023-07-20 04:00:00	MTA	IMPLANTABLE COLLAMER LENS (ICL)	Misfocusing	Blurred Vision	P030016	Event Description: THE REPORTER INDICATED THAT A 12.0MM ICM120V4 IMPLANTABLE COLLAMER LENS OF A -16.5 DIOPTER WAS IMPLANTED INTO THE PATIENTS LEFT EYE (OS) ON (B)(6) 2012. REFRACTIVE CHANGE OVERTIME WAS OBSERVED. Manufacturer Narrative: A4-A6:UNK. H6: WORK ORDER SEARCH: NO SIMILAR COMPLAINTS WITHIN ASSOCIATED LOTS WERE FOUND. CLAIM# (B)(4).	OS	Physician	06/30/2023	2023	43	Female
https://www.accessdata.fda.gov/scripts/cdrh/cfdocs/cfMAUDE/Detail.CFM?MDRFOI__ID=17358386&pc=MTA	2023826-2023-02968	2023-06-17 04:00:00	Malfunction	STAAR SURGICAL COMPANY	2023-07-20 04:00:00	MTA	IMPLANTABLE COLLAMER LENS (ICL)	Misfocusing	Blurred Vision	P030016	Event Description: THE REPORTER INDICATED THAT A 12.0MM ICM120V4 IMPLANTABLE COLLAMER LENS OF A -16 DIOPTER WAS IMPLANTED INTO THE PATIENTS RIGHT EYE (OD) ON (B)(6) 2012. REFRACTIVE CHANGE OVERTIME WAS OBSERVED. Manufacturer Narrative: A4-A6:UNK. H6: WORK ORDER SEARCH: NO SIMILAR COMPLAINTS WITHIN ASSOCIATED LOTS WERE FOUND. CLAIM# (B)(4).	OD	Physician	06/30/2023	2023	43	Female
https://www.accessdata.fda.gov/scripts/cdrh/cfdocs/cfMAUDE/Detail.CFM?MDRFOI__ID=17874320&pc=MTA	2023826-2023-04417	2023-07-04 04:00:00	Malfunction	STAAR SURGICAL COMPANY	2023-10-05 04:00:00	MTA	IMPLANTABLE COLLAMER LENS (ICL)	Misfocusing	Blurred Vision	P030016	Event Description: THE REPORTER INDICATED THAT A 12.1MM VICM612.1 IMPLANTABLE COLLAMER LENS OF -8.50 DIOPTER WAS IMPLANTED INTO THE PATIENT'S LEFT EYE (OS) ON (B)(6) 2023. REFRACTIVE SURPRISE WAS REPORTED, LENS REMAINS IMPLANTED. IF ADDITIONAL INFORMATION IS RECEIVED A SUPPLEMENTAL MEDWATCH REPORT WILL BE SUBMITTED. Manufacturer Narrative: H6 - TYPE OF INVESTIGATION - LENS WORK ORDER SEARCH: NO S…	OS	Physician	09/11/2023	2023	42	Female
https://www.accessdata.fda.gov/scripts/cdrh/cfdocs/cfMAUDE/Detail.CFM?MDRFOI__ID=17581258&pc=MTA	2023826-2023-03589	2023-07-13 04:00:00	Injury	STAAR SURGICAL COMPANY	2023-08-20 04:00:00	MTA	IMPLANTABLE COLLAMER LENS (ICL)	Misfocusing	Blurred Vision	P030016	Event Description: THE REPORTER INDICATED THAT A 12.6MM VICM5_12.6 IMPLANTABLE COLLAMER LENS OF -9.00 DIOPTER WAS IMPLANTED INTO THE PATIENT'S LEFT EYE (OS) ON (B)(6) 2023 . ON (B)(6) 2023 THE LENS WAS EXCHANGED FOR A DIFFERENT POWER LENS DUE TO TRANSIENT LOSS OF BCVA . THE EXCHANGE RESOLVED THE PROBLEM. CAUSE IS REPORTED AS UNKNOWN. Manufacturer Narrative: H6 - TYPE OF INVESTIGATION: 4110 - LENS…	OS	Physician	07/25/2023	2023	23	Male
https://www.accessdata.fda.gov/scripts/cdrh/cfdocs/cfMAUDE/Detail.CFM?MDRFOI__ID=17581262&pc=MTA	2023826-2023-03588	2023-07-13 04:00:00	Injury	STAAR SURGICAL COMPANY	2023-08-20 04:00:00	MTA	IMPLANTABLE COLLAMER LENS (ICL)	Misfocusing	Blurred Vision	P030016	Event Description: THE REPORTER INDICATED THAT A 12.6MM VICM5_12.6 IMPLANTABLE COLLAMER LENS OF -11.00 DIOPTER WAS IMPLANTED INTO THE PATIENT'S RIGHT EYE (OD) ON (B)(6) 2023. ON (B)(6) 2023 THE LENS WAS EXCHANGED FOR A DIFFERENT POWER LENS DUE TO TRANSIENT LOSS OF BCVA . THE EXCHANGE RESOLVED THE PROBLEM. CAUSE IS REPORTED AS UNKNOWN. Manufacturer Narrative: H6 - TYPE OF INVESTIGATION: 4110 - LEN…	OD	Physician	07/25/2023	2023	23	Male
https://www.accessdata.fda.gov/scripts/cdrh/cfdocs/cfMAUDE/Detail.CFM?MDRFOI__ID=17545681&pc=MTA	2023826-2023-03517	2023-07-16 04:00:00	Injury	STAAR SURGICAL COMPANY	2023-08-14 04:00:00	MTA	IMPLANTABLE COLLAMER LENS (ICL)	Misfocusing	Blurred Vision	P030016	Event Description: THE REPORTER INDICATED THAT A 13.2MM VICMO13.2 IMPLANTABLE COLLAMER LENS OF -4.5 DIOPTER WAS IMPLANTED INTO THE PATIENT'S LEFT EYE (OS) ON (B)(6) 2023. ON (B)(6) 2023 THE LENS WAS EXCHANGED FOR A DIFFERENT POWER LENS DUE TO REFRACTIVE SURPRISE. THE EXCHANGE RESOLVED THE PROBLEM. CAUSE OF EVENT WAS UNKNOWN. Manufacturer Narrative: DEVICE EVALUATION: H3 - TYPE OF INVESTIGATION CO…	OS	Physician	07/17/2023	2023	31	Female
https://www.accessdata.fda.gov/scripts/cdrh/cfdocs/cfMAUDE/Detail.CFM?MDRFOI__ID=17761235&pc=MTA	2023826-2023-04075	2023-08-08 04:00:00	Injury	STAAR SURGICAL COMPANY	2023-09-15 04:00:00	MTA	IMPLANTABLE COLLAMER LENS (ICL)	Misfocusing	Blurred Vision	P030016	Event Description: THE REPORTER INDICATED THAT THE SURGEON IMPLANTED A 12.6MM VICM5_12.6, -5.0 DIOPTER IMPLANTABLE COLLAMER LENS INTO THE PATIENT'S RIGHT EYE (OD) ON (B)(6) 2023. THE PATIENT EXPERIENCED REFRACTIVE SURPRISE. ON (B)(6) 2023 THE LENS WAS EXCHANGED WITH A SAME LENGTH LENS BUT DIFFERENT POWER. THIS RESOLVED THE PROBLEM. THE CAUSE OF THE EVENT WAS REPORTED AS UNKNOWN. Manufacturer Narr…	OD	Physician	09/01/2023	2023	28	Male
https://www.accessdata.fda.gov/scripts/cdrh/cfdocs/cfMAUDE/Detail.CFM?MDRFOI__ID=18395190&pc=MTA	2023826-2023-05776	2023-08-13 04:00:00	Injury	STAAR SURGICAL COMPANY	2023-12-26 05:00:00	MTA	IMPLANTABLE COLLAMER LENS (ICL)	Misfocusing	Blurred Vision	P030016	Event Description: THE REPORTER INDICATED THAT A 13.7MM VICMO 13.7 IMPLANTABLE COLLAMER LENS OF -13.00 DIOPTER WAS IMPLANTED INTO THE PATIENT'S RIGHT EYE (OD) ON (B)(6) 2023. REFRACTIVE SURPRISE WAS OBSERVED. ON (B)(6) 2023 THE LENS WAS EXCHANGED FOR A SAME MODEL AND SIZE LENS WITH DIFFERENT POWER AND THE PROBLEM WAS RESOLVED. CAUSE REPORTED AS UNKNOWN. Manufacturer Narrative: H6-INVESTIGATION TY…	OD	Physician	12/04/2023	2023	32	Male
https://www.accessdata.fda.gov/scripts/cdrh/cfdocs/cfMAUDE/Detail.CFM?MDRFOI__ID=18370009&pc=MTA	2023826-2023-05621	2023-08-21 04:00:00	Injury	STAAR SURGICAL COMPANY	2023-12-20 05:00:00	MTA	IMPLANTABLE COLLAMER LENS (ICL)	Misfocusing	Blurred Vision	P030016	Event Description: THE REPORTER INDICATED THAT A 13.2MM VICMO 13.2 IMPLANTABLE COLLAMER LENS OF -4.00 DIOPTER WAS IMPLANTED INTO THE PATIENT'S RIGHT EYE (OD) ON (B)(6) 2023. REFRACTIVE SURPRISE WAS OBSERVED. ON (B)(6) 2023 THE LENS WAS EXCHANGED FOR A SAME MODEL AND SIZE LENS BUT DIFFERENT DIOPTER AND THE PROBLEM WAS RESOLVED. CAUSE REPORTED AS USER ERROR. "DOCTOR CALCULATED LENS WRONGLY." Manufa…	OD	Physician	11/29/2023	2023	21	Female
https://www.accessdata.fda.gov/scripts/cdrh/cfdocs/cfMAUDE/Detail.CFM?MDRFOI__ID=18375462&pc=MTA	2023826-2023-05765	2023-08-22 04:00:00	Injury	STAAR SURGICAL COMPANY	2023-12-21 05:00:00	MTA	IMPLANTABLE COLLAMER LENS (ICL)	Misfocusing	Blurred Vision	P030016	Event Description: THE REPORTER INDICATED THAT THE SURGEON IMPLANTED A 12.6MM VICM5_12.6; -1.25 DIOPTER IMPLANTABLE COLLAMER LENS INTO THE PATIENT'S LEFT EYE (OS) ON (B)(3) 2023. THE PATIENT EXPERIENCED REFRACTIVE SURPRISE. ON (B)(3) 2023 THE LENS WAS EXCHANGED WITH A SAME LENGTH BUT DIFFERENT POWER LENS AND THIS RESOLVED THE PROBLEM. Manufacturer Narrative: H6 - TYPE OF INVESTIGATION: 4110 - LEN…	OS	Physician	12/14/2023	2023	35
https://www.accessdata.fda.gov/scripts/cdrh/cfdocs/cfMAUDE/Detail.CFM?MDRFOI__ID=18560295&pc=MTA	2023826-2024-00361	2023-08-22 04:00:00	Injury	STAAR SURGICAL COMPANY	2024-01-22 05:00:00	MTA	IMPLANTABLE COLLAMER LENS (ICL)	Misfocusing	Blurred Vision	P030016	Event Description: THE REPORTER INDICATED THAT A 12.6MM VICM5_12.6 IMPLANTABLE COLLAMER LENS OF -4.50 DIOPTER WAS IMPLANTED INTO THE PATIENT'S RIGHT EYE (OD). ON (B)(6) 2023 THE LENS WAS EXCHANGED FOR A DIFFERENT POWER LENS DUE TO REFRACTIVE SURPRISE. ADDITIONAL INFORMATION HAS BEEN REQUESTED BUT NONE HAS BEEN FORTHCOMING. IF ADDITIONAL INFORMATION IS RECEIVED A SUPPLEMENTAL MEDWATCH REPORT WILL …	OD	Physician	12/26/2023	2023	35	Female
https://www.accessdata.fda.gov/scripts/cdrh/cfdocs/cfMAUDE/Detail.CFM?MDRFOI__ID=17694988&pc=MTA	2023826-2023-03947	2023-08-25 04:00:00	Malfunction	STAAR SURGICAL COMPANY	2023-09-06 04:00:00	MTA	IMPLANTABLE COLLAMER LENS (ICL)	Misfocusing	Blurred Vision	P030016	Event Description: THE REPORTER INDICATED THAT THE SURGEON IMPLANTED A 13.2MM VICM5_13.2, -5.0 DIOPTER IMPLANTABLE COLLAMER LENS INTO THE PATIENT'S RIGHT EYE (OD) ON (B)(6) 2023. IT WAS REPORTED THAT THE PATIENT HAS REFRACTIVE SURPRISE. THE SURGEON PERFORMED LRI SURGERY. LENS REMAINS IMPLANTED. IT WAS REPORTED THAT THE CAUSE OF THE EVENT WAS REPORTED AS A USER ERROR WITH NO DEVICE CAUSALITY AND N…	OD	Physician	11/21/2023	2023	32	Female
https://www.accessdata.fda.gov/scripts/cdrh/cfdocs/cfMAUDE/Detail.CFM?MDRFOI__ID=17694989&pc=MTA	2023826-2023-03948	2023-08-25 04:00:00	Malfunction	STAAR SURGICAL COMPANY	2023-09-06 04:00:00	MTA	IMPLANTABLE COLLAMER LENS (ICL)	Misfocusing	Blurred Vision	P030016	Event Description: THE REPORTER INDICATED THAT THE SURGEON IMPLANTED A 13.2MM VICM5_13.2, -5.50 DIOPTER IMPLANTABLE COLLAMER LENS INTO THE PATIENT'S LEFT EYE (OS) ON 20-JUL-2023. IT WAS REPORTED THAT THE PATIENT HAS REFRACTIVE SURPRISE. THE SURGEON PERFORMED LRI SURGERY. LENS REMAINS IMPLANTED. IT WAS REPORTED THAT THE CAUSE OF THE EVENT WAS REPORTED AS A USER ERROR WITH NO DEVICE CAUSALITY AND N…	OS	Physician	11/21/2023	2023	32	Female
https://www.accessdata.fda.gov/scripts/cdrh/cfdocs/cfMAUDE/Detail.CFM?MDRFOI__ID=18271396&pc=MTA	2023826-2023-05501	2023-08-25 04:00:00	Injury	STAAR SURGICAL COMPANY	2023-12-05 05:00:00	MTA	IMPLANTABLE COLLAMER LENS (ICL)	Misfocusing	Blurred Vision	P030016	Event Description: THE REPORTER INDICATED THAT A 12.6MM VICMO12.6 IMPLANTABLE COLLAMER LENS OF -5.0 DIOPTER WAS IMPLANTED INTO THE PATIENT'S LEFT EYE (OS) ON (B)(6) 2023. ON (B)(6) 2023 THE LENS WAS EXCHANGED FOR A TORIC LENS OF DIFFERENT POWER DUE TO REFRACTIVE SURPRISE. THE EXCHANGE RESOLVED THE PROBLEM. CAUSE OF EVENT WAS UNKNOWN. Manufacturer Narrative: H6 - TYPE OF INVESTIGATION - LENS WORK …	OS	Physician	11/06/2023	2023	24	Male
https://www.accessdata.fda.gov/scripts/cdrh/cfdocs/cfMAUDE/Detail.CFM?MDRFOI__ID=17891552&pc=MTA	2023826-2023-04271	2023-08-27 04:00:00	Injury	STAAR SURGICAL COMPANY	2023-10-06 04:00:00	MTA	IMPLANTABLE COLLAMER LENS (ICL)	Misfocusing	Blurred Vision	P030016	Event Description: THE REPORTER INDICATED THAT A 13.7MM VICM5 13.7 IMPLANTABLE COLLAMER LENS OF -13.00 DIOPTER WAS IMPLANTED INTO THE PATIENT'S RIGHT EYE (OD) ON AN UNKNOWN DATE. EXCESSIVE VAULT WAS REPORTED AND BLURRED VISION. THE LENS REMAINS IMPLANTED. CAUSE REPORTED AS DEVICE. Manufacturer Narrative: H6-INVESTIGATION TYPE 4110: LENS WORK ORDER SEARCH- NO SIMILAR COMPLAINT EVENT(S) WITHIN ASSO…	OD	Other Health Care Professional	09/08/2023	2023	30	Female
https://www.accessdata.fda.gov/scripts/cdrh/cfdocs/cfMAUDE/Detail.CFM?MDRFOI__ID=18233713&pc=MTA	2023826-2023-05366	2023-08-31 04:00:00	Injury	STAAR SURGICAL COMPANY	2023-11-29 05:00:00	MTA	IMPLANTABLE COLLAMER LENS (ICL)	Misfocusing	Blurred Vision	P030016	Event Description: THE REPORTER INDICATED THAT A 13.2MM VICMO13.2 IMPLANTABLE COLLAMER LENS OF -17.0 DIOPTER WAS IMPLANTED INTO THE PATIENT'S LEFT EYE (OS) ON (B)(6) 2023. ON (B)(6) 2023, THE LENS WAS EXCHANGED FOR A REPLACEMENT LENS AND THE PROBLEM WAS RESOLVED. CAUSE OF THE EVENT IS UNKNOWN. Manufacturer Narrative: H6: WORK ORDER SEARCH: NO SIMILAR COMPLAINTS WITHIN ASSOCIATED LOTS WERE FOUND. …	OS	Physician	11/19/2023	2023	44	Female
https://www.accessdata.fda.gov/scripts/cdrh/cfdocs/cfMAUDE/Detail.CFM?MDRFOI__ID=18057401&pc=MTA	2023826-2023-04943	2023-09-14 04:00:00	Injury	STAAR SURGICAL COMPANY	2023-11-02 04:00:00	MTA	IMPLANTABLE COLLAMER LENS (ICL)	Misfocusing	Blurred Vision	P030016	Event Description: THE REPORTER INDICATED THAT THE SURGEON IMPLANTED A 13.2M VICMO13.2; -12.0 DIOPTER IMPLANTABLE COLLAMER LENS INTO THE PATIENT'S LEFT EYE (OS) ON (B)(6) 2023. THE PATIENT EXPERIENCED REFRACTIVE SURPRISE. ON (B)(6) 2023 THE LENS WAS EXCHANGED WITH A SAME LENGTH BUT DIFFERENT POWER LENS AND THIS RESOLVED THE PROBLEM. THE CAUSE OF THE EVENT WAS REPORTED AS UNKNOWN. Manufacturer Nar…	OS	Physician	10/29/2023	2023	44	Female
https://www.accessdata.fda.gov/scripts/cdrh/cfdocs/cfMAUDE/Detail.CFM?MDRFOI__ID=18066236&pc=MTA	2023826-2023-04855	2023-09-15 04:00:00	Injury	STAAR SURGICAL COMPANY	2023-11-03 04:00:00	MTA	IMPLANTABLE COLLAMER LENS (ICL)	Misfocusing	Blurred Vision	P030016	Event Description: THE REPORTER INDICATED THAT A 12.1MM VICMO12.1 IMPLANTABLE COLLAMER LENS OF -14.0 DIOPTER WAS IMPLANTED INTO THE PATIENT'S RIGHT EYE (OD) ON (B)(6) 2023. ON (B)(6) 2023, THE LENS WAS EXCHANGED DUE TO REFRACTIVE SUPRISE. THE PROBLEM WAS RESOLVED. CAUSE OF THE EVENT IS UNKNOWN. Manufacturer Narrative: H6: WORK ORDER SEARCH: NO SIMILAR COMPLAINTS WITHIN ASSOCIATED LOTS WERE FOUND.…	OD	Physician	10/29/2023	2023	45	Female
https://www.accessdata.fda.gov/scripts/cdrh/cfdocs/cfMAUDE/Detail.CFM?MDRFOI__ID=18136064&pc=MTA	2023826-2023-05082	2023-09-15 04:00:00	Injury	STAAR SURGICAL COMPANY	2023-11-14 05:00:00	MTA	IMPLANTABLE COLLAMER LENS (ICL)	Misfocusing	Blurred Vision	P030016	Event Description: THE REPORTER INDICATED THAT A 12.6MM VICMO12.6 IMPLANTABLE COLLAMER LENS OF -5.0 DIOPTER WAS IMPLANTED INTO THE PATIENT'S RIGHT EYE (OD) ON (B)(6) 2023. ON (B)(6) 2023, THE LENS WAS EXCHANGED FOR A TORIC MODEL LENS DUE TO REFRACTIVE SUPRISE. THE PROBLEM WAS RESOLVED. CAUSE OF THE EVENT IS UNKNOWN. Manufacturer Narrative: H6: WORK ORDER SEARCH: NO SIMILAR COMPLAINTS WITHIN ASSOC…	OD	Physician	11/06/2023	2023	24	Male
https://www.accessdata.fda.gov/scripts/cdrh/cfdocs/cfMAUDE/Detail.CFM?MDRFOI__ID=18136489&pc=MTA	2023826-2023-05058	2023-09-16 04:00:00	Injury	STAAR SURGICAL COMPANY	2023-11-14 05:00:00	MTA	IMPLANTABLE COLLAMER LENS (ICL)	Misfocusing	Blurred Vision	P030016	Event Description: THE REPORTER INDICATED THAT A 12.6MM VICMO12.6 IMPLANTABLE COLLAMER LENS OF -4.0 DIOPTER WAS IMPLANTED INTO THE PATIENT'S LEFT EYE (OS) ON (B)(6) 2023. ON (B)(6) 2023 THE LENS WAS EXCHANGED FOR A TORIC LENS OF DIFFERENT POWER DUE TO REFRACTIVE SURPRISE. THE EXCHANGE RESOLVED THE PROBLEM. CAUSE OF EVENT WAS UNKNOWN. Manufacturer Narrative: H6 - TYPE OF INVESTIGATION - LENS WORK …	OS	Physician	10/16/2023	2023	24	Female
https://www.accessdata.fda.gov/scripts/cdrh/cfdocs/cfMAUDE/Detail.CFM?MDRFOI__ID=18478055&pc=MTA	2023826-2024-00053	2023-09-28 04:00:00	Injury	STAAR SURGICAL COMPANY	2024-01-09 05:00:00	MTA	IMPLANTABLE COLLAMER LENS (ICL)	Misfocusing	Blurred Vision	P030016	Event Description: THE REPORTER INDICATED THAT A 13.2MM VICMO 13.2 IMPLANTABLE COLLAMER LENS OF -10.00 DIOPTER WAS IMPLANTED INTO THE PATIENTS RIGHT EYE (OD) ON (B)(6) 2023. ON THE SAME DAY DIFFERENT SURGERY THE LENS WAS EXCHANGED FOR A SHORTER LENS DUE TO REFRACTIVE SURPRISE AND THE PROBLEM WAS RESOLVED. Manufacturer Narrative: H6-INVESTIGATION TYPE 4110: LENS WORK ORDER SEARCH- NO SIMILAR COMPL…	OD	Physician	12/11/2023	2023	27	Female
https://www.accessdata.fda.gov/scripts/cdrh/cfdocs/cfMAUDE/Detail.CFM?MDRFOI__ID=18416892&pc=MTA	2023826-2023-05827	2023-09-29 04:00:00	Injury	STAAR SURGICAL COMPANY	2023-12-29 05:00:00	MTA	IMPLANTABLE COLLAMER LENS (ICL)	Misfocusing	Blurred Vision	P030016	Event Description: THE REPORTER INDICATED THAT A 12.1MM VICMO12.1 IMPLANTABLE COLLAMER LENS OF -11.50 DIOPTER WAS IMPLANTED INTO THE PATIENT'S LEFT EYE (OS) ON (B)(6) 2023. ON (B)(6) 2023 THE LENS WAS EXCHANGED FOR A LENS OF DIFFERENT POWER DUE TO REFRACTIVE SURPRISE AND THE PROBLEM RESOLVED. CAUSE OF EVENT WAS UNKNOWN. Manufacturer Narrative: H6 - TYPE OF INVESTIGATION - LENS WORK ORDER SEARCH: …	OS	Physician	12/04/2023	2023	45	Female
https://www.accessdata.fda.gov/scripts/cdrh/cfdocs/cfMAUDE/Detail.CFM?MDRFOI__ID=18062883&pc=MTA	2023826-2023-04964	2023-10-04 04:00:00	Malfunction	STAAR SURGICAL COMPANY	2023-11-03 04:00:00	MTA	IMPLANTABLE COLLAMER LENS (ICL)	Misfocusing	Blurred Vision	P030016	Event Description: THE REPORTER INDICATED THAT A 13.2MM VICMO13.2 IMPLANTABLE COLLAMER LENS OF -14.50 DIOPTER WAS IMPLANTED INTO THE PATIENT'S LEFT EYE (OS) ON (B)(6) 2023. REFRACTIVE SURPRISE WAS REPORTED, LENS REMAINS IMPLANTED. IN THE REPORTERS OPINION THE CAUSE OF THE EVENT IS USER ERROR. THE REPORTER STATES THAT THE DEVICE DID NOT FAIL TO PERFORM AS INTENDED. ADDITIONAL INFORMATION HAS BEEN …	OS	Physician	10/09/2023	2023		Female
https://www.accessdata.fda.gov/scripts/cdrh/cfdocs/cfMAUDE/Detail.CFM?MDRFOI__ID=18323057&pc=MTA	2023826-2023-05653	2023-10-10 04:00:00	Injury	STAAR SURGICAL COMPANY	2023-12-13 05:00:00	MTA	IMPLANTABLE COLLAMER LENS (ICL)	Misfocusing	Blurred Vision	P030016	Event Description: THE REPORTER INDICATED THAT THE SURGEON IMPLANTED A 13.2MM VICM5_13.2 IMPLANTABLE COLLAMER LENS OF -3.5 DIOPTER INTO THE PATIENT'S RIGHT EYE (OD) ON (B)(6) 2023. THE LENS WAS REMOVED DUE TO REFRACTIVE CHANGE OVERTIME. ON (B)(6) 2023 A REPLACEMENT LENS OF DIFFERENT POWER WAS IMPLANTED AND THE PROBLEM RESOLVED. CAUSE OF EVENT REPORTED AS UNKNOWN. Manufacturer Narrative: H6 - TYPE…	OD	Physician	11/15/2023	2023	48	Male
https://www.accessdata.fda.gov/scripts/cdrh/cfdocs/cfMAUDE/Detail.CFM?MDRFOI__ID=18478523&pc=MTA	2023826-2024-00054	2023-10-17 04:00:00	Injury	STAAR SURGICAL COMPANY	2024-01-09 05:00:00	MTA	IMPLANTABLE COLLAMER LENS (ICL)	Misfocusing	Blurred Vision	P030016	Event Description: THE REPORTER INDICATED THAT A 13.2MM VICMO 13.2 IMPLANTABLE COLLAMER LENS OF -8.00 DIOPTER WAS IMPLANTED INTO THE PATIENTS RIGHT EYE (OD) ON (B)(6) 2021. REFRACTIVE SURPRISE WAS OBSERVED. ON (B)(6) 2023 THE LENS WAS EXCHANGED FOR A LONGER LENGTH TORIC LENS AND THE PROBLEM WAS RESOLVED. Manufacturer Narrative: H6-INVESTIGATION TYPE 4110: LENS WORK ORDER SEARCH- NO SIMILAR COMPLA…	OD	Physician	12/11/2023	2023	37	Female
https://www.accessdata.fda.gov/scripts/cdrh/cfdocs/cfMAUDE/Detail.CFM?MDRFOI__ID=18271708&pc=MTA	2023826-2023-05505	2023-10-19 04:00:00	Injury	STAAR SURGICAL COMPANY	2023-12-05 05:00:00	MTA	IMPLANTABLE COLLAMER LENS (ICL)	Misfocusing	Blurred Vision	P030016	Event Description: THE REPORTER INDICATED THAT A 13.2MM VICM5_13.2 IMPLANTABLE COLLAMER LENS OF -6.00 DIOPTER WAS IMPLANTED INTO THE PATIENT'S LEFT EYE (OS) ON (B)(6) 2023. REFRACTIVE SURPRISE WAS REPORTED, LENS REMAINS IMPLANTED. IF ADDITIONAL INFORMATION IS RECEIVED A SUPPLEMENTAL MEDWATCH REPORT WILL BE SUBMITTED. Manufacturer Narrative: H6 - TYPE OF INVESTIGATION - LENS WORK ORDER SEARCH: NO …	OS	Physician	11/09/2023	2023	27	Female
https://www.accessdata.fda.gov/scripts/cdrh/cfdocs/cfMAUDE/Detail.CFM?MDRFOI__ID=18258189&pc=MTA	2023826-2023-05312	2023-10-25 04:00:00	Injury	STAAR SURGICAL COMPANY	2023-12-04 05:00:00	MTA	IMPLANTABLE COLLAMER LENS (ICL)	Misfocusing	Blurred Vision	P030016	Event Description: THE REPORTER INDICATED THAT A 13.2MM, VICM5_13.2, -7.0 DIOPTER, IMPLANTABLE COLLAMER LENS WAS IMPLANTED INTO THE PATIENT'S LEFT EYE (OS) ON (B)(6) 2023. ON (B)(6) 2023 THE LENS WAS REPLACED WITH A SAME SIZE , DIFFERENT DIOPTER LENS DUE TO REFRACTIVE SURPRISE(ASSESSED ON (B)(6) 2023). THE PROBLEM WAS RESOLVED. Manufacturer Narrative: A4 - UNK. A5 - UNK. A6 - UNK. H6 - WORK ORDER…	OS	Physician	11/14/2023	2023	48	Female
https://www.accessdata.fda.gov/scripts/cdrh/cfdocs/cfMAUDE/Detail.CFM?MDRFOI__ID=18258205&pc=MTA	2023826-2023-05311	2023-10-25 04:00:00	Injury	STAAR SURGICAL COMPANY	2023-12-04 05:00:00	MTA	IMPLANTABLE COLLAMER LENS (ICL)	Misfocusing	Blurred Vision	P030016	Event Description: THE REPORTER INDICATED THAT A 13.2MM, VICM5_13.2, -7.0 DIOPTER, IMPLANTABLE COLLAMER LENS WAS IMPLANTED INTO THE PATIENT'S RIGHT EYE (OD) ON (B)(6) 2023. ON (B)(6) 2023 THE LENS WAS REPLACED WITH A SAME SIZE , DIFFERENT DIOPTER (SPHERE/CYLINDER/AXIS) LENS DUE TO REFRACTIVE SURPRISE(ASSESSED ON (B)(6) 2023). THE PROBLEM WAS RESOLVED. Manufacturer Narrative: H6 - WORK ORDER SEARC…	OD	Physician	11/15/2023	2023	48	Female
https://www.accessdata.fda.gov/scripts/cdrh/cfdocs/cfMAUDE/Detail.CFM?MDRFOI__ID=18196960&pc=MTA	2023826-2023-05303	2023-10-27 04:00:00	Injury	STAAR SURGICAL COMPANY	2023-11-22 05:00:00	MTA	IMPLANTABLE COLLAMER LENS (ICL)	Misfocusing	Blurred Vision	P030016	Event Description: THE REPORTER INDICATED THAT A 13.2MM VICM5_13.2 IMPLANTABLE COLLAMER LENS OF -10.00 DIOPTER WAS IMPLANTED INTO THE PATIENT'S RIGHT EYE (OD) ON 18- SEP-2023. REFRACTIVE SURPRISE WAS REPORTED, LENS REMAINS IMPLANTED. IF ADDITIONAL INFORMATION IS RECEIVED A SUPPLEMENTAL MEDWATCH REPORT WILL BE SUBMITTED. Manufacturer Narrative: H6 - TYPE OF INVESTIGATION - LENS WORK ORDER SEARCH: …	OD	Physician	10/26/2023	2023	51	Male
https://www.accessdata.fda.gov/scripts/cdrh/cfdocs/cfMAUDE/Detail.CFM?MDRFOI__ID=18321863&pc=MTA	2023826-2023-05652	2023-11-02 04:00:00	Malfunction	STAAR SURGICAL COMPANY	2023-12-13 05:00:00	MTA	IMPLANTABLE COLLAMER LENS (ICL)	Misfocusing	Blurred Vision	P030016	Event Description: THE REPORTER INDICATED THAT A 13.2MM VICM5_13.2 IMPLANTABLE COLLAMER LENS OF -9.5 DIOPTER WAS IMPLANTED INTO THE PATIENT'S RIGHT EYE (OD). REFRACTIVE SURPRISE WAS REPORTED, LENS REMAINS IMPLANTED. CAUSE OF EVEN WAS UNKNOWN. IF ADDITIONAL INFORMATION IS RECEIVED A SUPPLEMENTAL MEDWATCH REPORT WILL BE SUBMITTED. Manufacturer Narrative: CLAIM# (B)(4). Manufacturer Narrative: H6 - …	OD	Physician	11/15/2023	2023	41	Female
https://www.accessdata.fda.gov/scripts/cdrh/cfdocs/cfMAUDE/Detail.CFM?MDRFOI__ID=18522597&pc=MTA	2023826-2024-00230	2023-11-27 05:00:00	Injury	STAAR SURGICAL COMPANY	2024-01-16 05:00:00	MTA	IMPLANTABLE COLLAMER LENS (ICL)	Misfocusing	Blurred Vision	P030016	Event Description: THE REPORTER INDICATED THAT A 12.6MM VICM5_12.6 IMPLANTABLE COLLAMER LENS OF -5.00 DIOPTER WAS IMPLANTED INTO THE PATIENT'S RIGHT EYE (OD) ON (B)(6) 2023. ON (B)(6) 2023 THE LENS WAS EXCHANGED FOR A DIFFERENT POWER LENS DUE TO REFRACTIVE SURPRISE AND THE PROBLEM RESOLVED. CAUSE OF EVENT WAS UNKNOWN. Manufacturer Narrative: H6 - TYPE OF INVESTIGATION - LENS WORK ORDER SEARCH: NO…	OD	Physician	12/22/2023	2023	39	Male
https://www.accessdata.fda.gov/scripts/cdrh/cfdocs/cfMAUDE/Detail.CFM?MDRFOI__ID=10856340&pc=MTA	2023826-2020-02698		Injury	STAAR SURGICAL COMPANY	2020-11-17	MTA	IMPLANTABLE COLLAMER LENS (ICL)	Misfocusing	Blurred Vision	N/A	Event Description: THE REPORTER INDICATED THAT THE SURGEON IMPLANTED A 13.2MM VICM5_13.2, -7.5 DIOPTER IMPLANTABLE COLLAMER LENS INTO THE PATIENT'S RIGHT EYE (OD). THE SURGEON REPORTS RESIDUAL REFRACTIVE ERROR WHICH HAD TO BE CORRECTED WITH LASIK. Manufacturer Narrative: THIS PRODUCT IS MANUFACTURED IN THE U.S. BUT NOT MARKETED IN THE U.S. LENS WORK ORDER SEARCH-NO SIMILAR COMPLAINT TYPE EVENTS R…	OD	Physician	10/23/2020	2020
https://www.accessdata.fda.gov/scripts/cdrh/cfdocs/cfMAUDE/Detail.CFM?MDRFOI__ID=11308938&pc=MTA	2023826-2021-00226		Malfunction	STAAR SURGICAL COMPANY	2021-02-10	MTA	IMPLANTABLE COLLAMER LENS (ICL)	Misfocusing	Blurred Vision	N/A	Event Description: THE REPORTER INDICATED THAT A 12.1MM, VICM5 12.1, -12.50 DIOPTER, IMPLANTABLE COLLAMER LENS WAS IMPLANTED INTO THE PATIENT'S RIGHT EYE (OD). REFRACTIVE SURPRISE WAS OBSERVED, THE LENS REMAINS IMPLANTED. ON (B)(6) 2020 REFRACTIVE TREATMENT (LASIK, PRK, ETC.) WAS PERFORMED. REPORTEDLY, "THE AMOUNT OF HIPER CORRECTION IS ONLY XPLAINED BY A MISTAKE IN THE LENS POWER. ADDITIONAL INF…	OD	Physician	01/22/2021	2021
https://www.accessdata.fda.gov/scripts/cdrh/cfdocs/cfMAUDE/Detail.CFM?MDRFOI__ID=12148271&pc=MTA	2023826-2021-02474		Injury	STAAR SURGICAL COMPANY	2021-07-11	MTA	IMPLANTABLE COLLAMER LENS	Misfocusing	Blurred Vision	NA	Event Description: THE REPORTER INDICATED THAT THE SURGEON IMPLANTED A 12.6MM VICM5_12.6 IMPLANTABLE COLLAMER LENS, -2.5 DIOPTER INTO THE PATIENT'S RIGHT EYE (OD). REPORTEDLY, THE LENS WAS "CHANGED" DUE TO REFRACTION ERROR. ATTEMPTS TO OBTAIN ADDITIONAL INFORMATION HAVE NOT BEEN SUCCESSFUL. Manufacturer Narrative: PT INFO: UNK. DATE OF EVENT - UNK. PMA/510(K): THIS PRODUCT IS MANUFACTURED IN THE …	OD	Physician	06/15/2021	2021
https://www.accessdata.fda.gov/scripts/cdrh/cfdocs/cfMAUDE/Detail.CFM?MDRFOI__ID=13657017&pc=MTA	2023826-2022-00665		Malfunction	STAAR SURGICAL COMPANY	2022-03-02 05:00:00	MTA	IMPLANTABLE COLLAMER LENS (ICL)	Misfocusing	Blurred Vision		Event Description: THE REPORTER INDICATED THAT THE SURGEON IMPLANTED A 13.7MM VICM6_13.7; -10.50 DIOPTER IMPLANTABLE COLLAMER LENS INTO THE PATIENT'S LEFT EYE (OS) ON (B)(6) 2021. THE PATIENT EXPERIENCED REFRACTIVE SURPRISE. THE POST OP REPORT INDICATES "SHE SAYS THAT SEEING IS BETTER OVERALL. ESPECIALLY IN THE DISTANCE. HOWEVER; SHE IS NOW USING READING GLASSES WITH +2.00DPT. I GAVE HER CONTACT …	OS	Physician	02/01/2022	2022	53	Female
https://www.accessdata.fda.gov/scripts/cdrh/cfdocs/cfMAUDE/Detail.CFM?MDRFOI__ID=13657018&pc=MTA	2023826-2022-00664		Malfunction	STAAR SURGICAL COMPANY	2022-03-02 05:00:00	MTA	IMPLANTABLE COLLAMER LENS (ICL)	Misfocusing	Blurred Vision		Event Description: THE REPORTER INDICATED THAT THE SURGEON IMPLANTED A 13.7MM VICM5_13.7; -9.50 DIOPTER IMPLANTABLE COLLAMER LENS INTO THE PATIENT'S RIGHT EYE (OD) ON (B)(6) 2021. THE PATIENT EXPERIENCED REFRACTIVE SURPRISE. THE POST OP REPORT INDICATES "SHE SAYS THAT SEEING IS BETTER OVERALL. ESPECIALLY IN THE DISTANCE. HOWEVER; SHE IS NOW USING READING GLASSES WITH +2.00DPT. I GAVE HER CONTACT …	OD	Physician	02/01/2022	2022	53	Female
https://www.accessdata.fda.gov/scripts/cdrh/cfdocs/cfMAUDE/Detail.CFM?MDRFOI__ID=14283152&pc=MTA	2023826-2022-01402		Malfunction	STAAR SURGICAL COMPANY	2022-05-04 04:00:00	MTA	IMPLANTABLE COLLAMER LENS (ICL)	Misfocusing	Blurred Vision		Event Description: THE REPORTER INDICATED THAT THE SURGEON IMPLANTED A 13.7MM VICM5_13.7; -5.00 DIOPTER IMPLANTABLE COLLAMER LENS INTO THE PATIENT'S LEFT EYE ON (B)(6) 2022; AS A REPLACEMENT LENS TO A PREVIOUS LOW VAULTING AND CATARACT ISSUE. IT WAS MENTIONED THE PROBLEM WAS RESOLVED; HOWEVER NOTED "AFTER LENS REPLACEMENT THERE IS A DECREASE IN VISUAL ACUITY; BUT THE PATIENT IS UNDER OBSERVATION.…	OS	Physician	04/22/2022	2022		Male
https://www.accessdata.fda.gov/scripts/cdrh/cfdocs/cfMAUDE/Detail.CFM?MDRFOI__ID=14749667&pc=MTA	2023826-2022-01944		Malfunction	STAAR SURGICAL COMPANY	2022-06-20 04:00:00	MTA	IMPLANTABLE COLLAMER LENS (ICL)	Misfocusing	Blurred Vision		Event Description: THE REPORTER INDICATED THAT THE SURGEON IMPLANTED A 13.2MM VICM6_13.2; -7.5 DIOPTER IMPLANTABLE COLLAMER LENS INTO THE PATIENT'S LEFT EYE (OS). THERE WAS REFRACTIVE SURPRISE REPORTED. LENS REMAINS IMPLANTED. Manufacturer Narrative: PMA/510(K): THIS PRODUCT IS MANUFACTURED IN THE U.S. BUT NOT MARKETED IN THE U.S. CLAIM#: (B)(4).	OS	Physician	05/22/2022	2022		Male
https://www.accessdata.fda.gov/scripts/cdrh/cfdocs/cfMAUDE/Detail.CFM?MDRFOI__ID=14749668&pc=MTA	2023826-2022-01943		Malfunction	STAAR SURGICAL COMPANY	2022-06-20 04:00:00	MTA	IMPLANTABLE COLLAMER LENS (ICL)	Misfocusing	Blurred Vision		Event Description: THE REPORTER INDICATED THAT THE SURGEON IMPLANTED A 13.2MM VICM6_13.2; -6.5 DIOPTER IMPLANTABLE COLLAMER LENS INTO THE PATIENT'S RIGHT EYE (OD). THERE WAS REFRACTIVE SURPRISE REPORTED. LENS REMAINS IMPLANTED. Manufacturer Narrative: PMA/510(K): THIS PRODUCT IS MANUFACTURED IN THE U.S. BUT NOT MARKETED IN THE U.S. CLAIM#: (B)(4).	OD	Physician	05/22/2022	2022		Male
https://www.accessdata.fda.gov/scripts/cdrh/cfdocs/cfMAUDE/Detail.CFM?MDRFOI__ID=15282555&pc=MTA	2023826-2022-02879		Injury	STAAR SURGICAL COMPANY	2022-08-24 04:00:00	MTA	IMPLANTABLE COLLAMER LENS (ICL)	Misfocusing	Blurred Vision	P030016	Event Description: THE REPORTER INDICATED THAT A 12.1MM VICM512.1 IMPLANTABLE COLLAMER LENS OF -8.0 DIOPTER WAS IMPLANTED IN THE PATIENT'S RIGHT EYE (OD) ON (B)(6) 2021. ON (B)(6) 2022, THE LENS WAS EXCHANGED FOR A TORIC MODEL LENS DUE TO REFRACTIVE SURPRISE. STATUS OF THE EYE IS REPORTED AS "RESOLVED." CAUSE OF THE EVENT IS USER ERROR. REPORTEDLY, "NEEDED A TORIC RATHER THAN A SPHERICAL LENS." M…	OD	Physician	07/26/2022	2022
https://www.accessdata.fda.gov/scripts/cdrh/cfdocs/cfMAUDE/Detail.CFM?MDRFOI__ID=15709881&pc=MTA	2023826-2022-03909		Injury	STAAR SURGICAL COMPANY	2022-11-01 04:00:00	MTA	IMPLANTABLE COLLAMER LENS (ICL)	Misfocusing	Blurred Vision	P030016	Event Description: THE REPORTER INDICATED THAT THE SURGEON IMPLANTED A VICM6; -10.50 DIOPTER IMPLANTABLE COLLAMER LENS INTO THE PATIENT'S RIGHT EYE (OD) ON (B)(6) 2021. IT WAS INDICATED THAT THE PATIENT HAD RESIDUAL REFRACTION AFTER IMPLANTATION. LASIK SURGERY WAS PERFORMED INITIALLY ON (B)(6) 2022 AND A LASIK REVISION ON (B)(6) 2022. LENS REMAINS IMPLANTED. IF ADDITIONAL INFORMATION IS RECEIVED …	OD	Physician	10/18/2022	2022
https://www.accessdata.fda.gov/scripts/cdrh/cfdocs/cfMAUDE/Detail.CFM?MDRFOI__ID=15709888&pc=MTA	2023826-2022-03910		Injury	STAAR SURGICAL COMPANY	2022-11-01 04:00:00	MTA	IMPLANTABLE COLLAMER LENS (ICL)	Misfocusing	Blurred Vision	P030016	Event Description: THE REPORTER INDICATED THAT THE SURGEON IMPLANTED A VICM6; -12.00 DIOPTER IMPLANTABLE COLLAMER LENS INTO THE PATIENT'S LEFT EYE (OS) ON (B)(6) 2021. IT WAS INDICATED THAT THE PATIENT HAD RESIDUAL REFRACTION AFTER IMPLANTATION. LASIK SURGERY WAS PERFORMED INITIALLY ON (B)(6) 2022 AND A LASIK REVISION ON (B)(6) 2022. LENS REMAINS IMPLANTED. IF ADDITIONAL INFORMATION IS RECEIVED A…	OS	Physician	10/18/2022	2022
https://www.accessdata.fda.gov/scripts/cdrh/cfdocs/cfMAUDE/Detail.CFM?MDRFOI__ID=15801769&pc=MTA	2023826-2022-04131		Injury	STAAR SURGICAL COMPANY	2022-11-15 05:00:00	MTA	IMPLANTABLE COLLAMER LENS (ICL)	Misfocusing	Blurred Vision	P030016	Event Description: THE REPORTER INDICATED THAT THE SURGEON IMPLANTED A VICM6; -7.00 DIOPTER IMPLANTABLE COLLAMER LENS INTO THE PATIENT'S LEFT EYE (OS) ON (B)(6) 2021. IT WAS INDICATED THAT THE PATIENT HAD RESIDUAL REFRACTION AFTER IMPLANTATION. LASIK SURGERY WAS PERFORMED INITIALLY ON 12-JUL-2022 AND A LASIK REVISION ON (B)(6) 2022. LENS REMAINS IMPLANTED. IF ADDITIONAL INFORMATION IS RECEIVED A …	OS	Physician	10/18/2022	2022
https://www.accessdata.fda.gov/scripts/cdrh/cfdocs/cfMAUDE/Detail.CFM?MDRFOI__ID=15801803&pc=MTA	2023826-2022-04130		Injury	STAAR SURGICAL COMPANY	2022-11-15 05:00:00	MTA	IMPLANTABLE COLLAMER LENS (ICL)	Misfocusing	Blurred Vision	P030016	Event Description: THE REPORTER INDICATED THAT THE SURGEON IMPLANTED A 12.6MM VICM6; -8.00 DIOPTER IMPLANTABLE COLLAMER LENS INTO THE PATIENT'S RIGHT EYE (OD) ON (B)(6) 2021. IT WAS INDICATED THAT THE PATIENT HAD RESIDUAL REFRACTION AFTER IMPLANTATION. LASIK SURGERY WAS PERFORMED INITIALLY ON (B)(6) 2022 AND A LASIK REVISION ON 27-JUL-2022. LENS REMAINS IMPLANTED. IF ADDITIONAL INFORMATION IS REC…	OD	Physician	10/18/2022	2022
https://www.accessdata.fda.gov/scripts/cdrh/cfdocs/cfMAUDE/Detail.CFM?MDRFOI__ID=15801953&pc=MTA	2023826-2022-04132		Injury	STAAR SURGICAL COMPANY	2022-11-15 05:00:00	MTA	IMPLANTABLE COLLAMER LENS (ICL)	Misfocusing	Blurred Vision	P030016	Event Description: THE REPORTER INDICATED THAT THE SURGEON IMPLANTED A VICM6; -6.00 DIOPTER IMPLANTABLE COLLAMER LENS INTO THE PATIENT'S LEFT EYE (OS) ON (B)(6) 2024. IT WAS INDICATED THAT THE PATIENT HAD RESIDUAL REFRACTION AFTER IMPLANTATION. LASIK SURGERY WAS PERFORMED ON (B)(6)2022. LENS REMAINS IMPLANTED. IF ADDITIONAL INFORMATION IS RECEIVED A SUPPLEMENTAL MEDWATCH REPORT WILL BE SUBMITTED.…	OS	Physician	10/18/2022	2022
https://www.accessdata.fda.gov/scripts/cdrh/cfdocs/cfMAUDE/Detail.CFM?MDRFOI__ID=15808829&pc=MTA	2023826-2022-04009		Injury	STAAR SURGICAL COMPANY	2022-11-16 05:00:00	MTA	IMPLANTABLE COLLAMER LENS (ICL)	Misfocusing	Blurred Vision	P030016	Event Description: THE REPORTER INDICATED THAT THE SURGEON IMPLANTED A 12.6MM OR 12.1MM VICM6 OF -7.0 DIOPTER IMPLANTABLE COLLAMER LENS INTO THE PATIENT'S RIGHT EYE (OD) ON (B)(6) 2021. IT WAS INDICATED THAT LASER VISION CORRECTION WAS PERFORMED ON (B)(6) 2022; DUE TO THE PATIENT HAVING RESIDUAL REFRACTION. LENS REMAINS IMPLANTED. Manufacturer Narrative: (B)(4).	OD	Physician	10/18/2022	2022
https://www.accessdata.fda.gov/scripts/cdrh/cfdocs/cfMAUDE/Detail.CFM?MDRFOI__ID=15811139&pc=MTA	2023826-2022-04010		Injury	STAAR SURGICAL COMPANY	2022-11-16 05:00:00	MTA	IMPLANTABLE COLLAMER LENS (ICL)	Misfocusing	Blurred Vision	P030016	Event Description: THE REPORTER INDICATED THAT THE SURGEON IMPLANTED A 12.6MM OR 12.1MM VICM6 OF -5.0 DIOPTER IMPLANTABLE COLLAMER LENS INTO THE PATIENT'S LEFT EYE (OS) ON (B)(6) 2021. IT WAS INDICATED THAT LASER VISION CORRECTION WAS PERFORMED ON (B)(6) 2022; DUE TO THE PATIENT HAVING RESIDUAL REFRACTION. LENS REMAINS IMPLANTED. Manufacturer Narrative: (B)(4).	OS	Physician	10/18/2022	2022
https://www.accessdata.fda.gov/scripts/cdrh/cfdocs/cfMAUDE/Detail.CFM?MDRFOI__ID=15831959&pc=MTA	2023826-2022-04018		Injury	STAAR SURGICAL COMPANY	2022-11-20 05:00:00	MTA	IMPLANTABLE COLLAMER LENS (ICL)	Misfocusing	Blurred Vision	P030016	Event Description: THE REPORTER INDICATED THAT A 12.1MM VICM5 12.1 IMPLANTABLE COLLAMER LENS OF -4.50 DIOPTER WAS IMPLANTED INTO THE PATIENTS RIGHT EYE (OD) ON (B)(6) 2022. REFRACTIVE SURPRISE WAS OBSERVED AND INCREASES OF CYL. THE LENS REMAINS IMPLANTED. CAUSE REPORTED AS DEVICE. Manufacturer Narrative: (B)(4). CLAIM#: (B)(4).	OD	Physician	10/20/2022	2022
https://www.accessdata.fda.gov/scripts/cdrh/cfdocs/cfMAUDE/Detail.CFM?MDRFOI__ID=15834977&pc=MTA	2023826-2022-03242		Injury	STAAR SURGICAL COMPANY	2022-11-21 05:00:00	MTA	IMPLANTABLE COLLAMER LENS (ICL)	Misfocusing	Blurred Vision	P030016	Event Description: IT WAS REPORTED THAT A 12.6 MM VICM612.6, -15.0 DIOPTER IMPLANTABLE COLLAMER LENS WAS IMPLANTED INTO A PATIENT'S RIGHT EYE (OD) (B)(6) 2021. ON (B)(6) 2021, LVC WAS PERFORMED DUE TO RESIDUAL REFRACTION AND POOR UDVA. Manufacturer Narrative: UNK. WORK ORDER SEARCH FOUND NO SIMILAR COMPLAINTS. CLAIM# (B)(4).	OD	Physician	08/25/2022	2022
https://www.accessdata.fda.gov/scripts/cdrh/cfdocs/cfMAUDE/Detail.CFM?MDRFOI__ID=15835000&pc=MTA	2023826-2022-03243		Injury	STAAR SURGICAL COMPANY	2022-11-21 05:00:00	MTA	IMPLANTABLE COLLAMER LENS (ICL)	Misfocusing	Blurred Vision	P030016	Event Description: IT WAS REPORTED THAT A 12.6MM VICM612.6, -16.0 DIOPTER IMPLANTABLE COLLAMER LENS WAS IMPLANTED INTO A PATIENT'S LEFT EYE (OS) (B)(6) 2021. ON (B)(6) 2021, LVC WAS PERFORMED DUE TO RESIDUAL REFRACTION AND POOR UDVA. Manufacturer Narrative: WORK ORDER SEARCH FOUND NO SIMILAR COMPLAINTS. CLAIM# (B)(4).	OS	Physician	08/25/2022	2022
https://www.accessdata.fda.gov/scripts/cdrh/cfdocs/cfMAUDE/Detail.CFM?MDRFOI__ID=15946952&pc=MTA	2023826-2022-04449		Injury	STAAR SURGICAL COMPANY	2022-12-08 05:00:00	MTA	IMPLANTABLE COLLAMER LENS (ICL)	Misfocusing	Blurred Vision	P030016	Event Description: THE REPORTER INDICATED THAT A 12.6MM VICM512.6 IMPLANTABLE COLLAMER LENS OF -7.5 DIOPTER WAS IMPLANTED IN THE PATIENT'S EYE ON (B)(6) 2022. REFRACTIVE SURPRISE WAS OBSERVED. Manufacturer Narrative: ADDITIONAL INFORMATION: B5: THE REPORTER INDICATED THAT A 12.6MM VICM512.6 IMPLANTABLE COLLAMER LENS OF -7.5 DIOPTER WAS IMPLANTED IN THE PATIENT'S EYE ON (B)(6) 2022. REFRACTIVE SUR…	NA	Physician	11/12/2022	2022
https://www.accessdata.fda.gov/scripts/cdrh/cfdocs/cfMAUDE/Detail.CFM?MDRFOI__ID=16517890&pc=MTA	2023826-2023-00844		Injury	STAAR SURGICAL COMPANY	2023-03-09 05:00:00	MTA	IMPLANTABLE COLLAMER LENS (ICL)	Misfocusing	Blurred Vision	P030016	Event Description: THE REPORTER INDICATED THAT THE SURGEON IMPLANTED A 12.6MM VICM6_12.6; -6.0 DIOPTER IMPLANTABLE COLLAMER LENS INTO THE PATIENT'S LEFT EYE (OS). THE SURGEON REPORTS THAT THERE WAS AN UNDESIRED REFRACTIVE OUTCOME. LENS REMAINS IMPLANTED. ATTEMPTS TO OBTAIN ADDITIONAL INFORMATION HAVE NOT BEEN SUCCESSFUL. IF ADDITIONAL INFORMATION IS RECEIVED A SUPPLEMENTAL MEDWATCH REPORT WILL BE…	OS	Physician	02/14/2023	2023
https://www.accessdata.fda.gov/scripts/cdrh/cfdocs/cfMAUDE/Detail.CFM?MDRFOI__ID=16517916&pc=MTA	2023826-2023-00843		Injury	STAAR SURGICAL COMPANY	2023-03-09 05:00:00	MTA	IMPLANTABLE COLLAMER LENS (ICL)	Misfocusing	Blurred Vision	P030016	Event Description: THE REPORTER INDICATED THAT THE SURGEON IMPLANTED A 12.6MM VICM6_12.6; -7.0 DIOPTER IMPLANTABLE COLLAMER LENS INTO THE PATIENT'S RIGHT EYE (OD). THE SURGEON REPORTS THAT THERE WAS AN UNDESIRED REFRACTIVE OUTCOME. LENS REMAINS IMPLANTED. ATTEMPTS TO OBTAIN ADDITIONAL INFORMATION HAVE NOT BEEN SUCCESSFUL. IF ADDITIONAL INFORMATION IS RECEIVED A SUPPLEMENTAL MEDWATCH REPORT WILL B…	OD	Physician	02/14/2023	2023
https://www.accessdata.fda.gov/scripts/cdrh/cfdocs/cfMAUDE/Detail.CFM?MDRFOI__ID=17607594&pc=MTA	2023826-2023-03630		Injury	STAAR SURGICAL COMPANY	2023-08-23 04:00:00	MTA	IMPLANTABLE COLLAMER LENS (ICL)	Misfocusing	Blurred Vision	P030016	Event Description: THE REPORTER INDICATED THAT A 13.2MM VICM513.2 IMPLANTABLE COLLAMER LENS OF -4.5 DIOPTER WAS IMPLANTED AS A REPLACEMENT INTO THE PATIENT'S LEFT EYE (OS) ON (B)(6) 2023, DUE TO LENS ROTATION NOT ASSOCIATED TO LOW VAULT. THE PROBLEM WAS NOT RESOLVED. REPORTEDLY, "BLURRED VISION DUE TO RESIDUAL ASTIGMATISM. SUBJECTIVE REFRACTION AT FINAL VISIT. +0-1.00X130." Manufacturer Narrative…	OS	Physician	08/08/2023	2023		Female
https://www.accessdata.fda.gov/scripts/cdrh/cfdocs/cfMAUDE/Detail.CFM?MDRFOI__ID=18187772&pc=MTA	2023826-2023-04974		Malfunction	STAAR SURGICAL COMPANY	2023-11-21 05:00:00	MTA	IMPLANTABLE COLLAMER LENS (ICL)	Misfocusing	Blurred Vision	P030016	Event Description: THE REPORTER INDICATED THAT A 12.6MM VICM5 12.6 IMPLANTABLE COLLAMER LENS OF -6.00 DIOPTER WAS IMPLANTED INTO THE PATIENT'S EYE ON AN UNKNOWN DATE. RESIDUAL REFRACTIVE ERROR IS REPORTED. THE LENS REMAINS IMPLANTED. NO FURTHER INFORMATION HAS BEEN PROVIDED. IF ADDITIONAL INFORMATION IS RECEIVED A SUPPLEMENTAL MEDWATCH REPORT WILL BE SUBMITTED. Manufacturer Narrative: H6-INVESTIG…	NA	Other Health Care Professional	11/01/2023	2023
https://www.accessdata.fda.gov/scripts/cdrh/cfdocs/cfMAUDE/Detail.CFM?MDRFOI__ID=18421048&pc=MTA	2023826-2023-05810		Injury	STAAR SURGICAL COMPANY	2023-12-29 05:00:00	MTA	IMPLANTABLE COLLAMER LENS (ICL)	Misfocusing	Blurred Vision	P030016	Event Description: THE REPORTER INDICATED THAT ON A 13.2MM VICM513.2 IMPLANTABLE COLLAMER LENS OF A -12.5 WAS IMPLANTED AS A REPLACEMENT INTO THE PATIENT'S RIGHT EYE (OD) ON (B)(6) 2023. ON (B)(6) 2023, THE LENS WAS EXCHANGED FOR A TORIC LENS DUE TO REFRACTIVE SURPRISE. THE PROBLEM WAS RESOLVED. THE CAUSE OF THE EVENT IS UNKNOWN. Manufacturer Narrative: A4-A6:UNK. H6: WORK ORDER SEARCH: NO SIMILA…	OD	Physician	12/22/2023	2023		Male
https://www.accessdata.fda.gov/scripts/cdrh/cfdocs/cfMAUDE/Detail.CFM?MDRFOI__ID=8656495&pc=MTA	2023826-2019-00942		Malfunction	STAAR SURGICAL COMPANY AG	2019-05-30	MTA	IMPLANTABLE COLLAMER LENS (ICL)	Misfocusing	Blurred Vision	NA	Event Description: THE REPORTER INDICATED THE SURGEON IMPLANTED A 12.0MM ICM120V4 IMPLANTABLE COLLAMER LENS, -14.0 DIOPTER, IN THE PATIENTS LEFT EYE (OS), BACK IN 2003/2004. THE PATIENT WAS EXPERIENCING REFRACTIVE CHANGE OVER TIME AND THE SURGEON WAS PLANNING TO EXPLANT AND EXCHANGE THE LENS. BUT THE SURGEON CHANGED HIS MIND AND DECIDED TO MONITOR THE PATIENT. THE LENS REMAINS IMPLANTED. Manufact…	OS	Physician	05/08/2019	2019
https://www.accessdata.fda.gov/scripts/cdrh/cfdocs/cfMAUDE/Detail.CFM?MDRFOI__ID=8656503&pc=MTA	2023826-2019-00943		Malfunction	STAAR SURGICAL COMPANY AG	2019-05-30	MTA	IMPLANTABLE COLLAMER LENS (ICL)	Misfocusing	Blurred Vision	NA	Event Description: THE REPORTER INDICATED THE SURGEON IMPLANTED A 12.0MM ICM120V4 IMPLANTABLE COLLAMER LENS, -14.5 DIOPTER, IN THE PATIENTS RIGHT EYE (OD), BACK IN 2003/2004. THE PATIENT WAS EXPERIENCING REFRACTIVE CHANGE OVER TIME AND THE SURGEON WAS PLANNING TO EXPLANT AND EXCHANGE THE LENS. BUT THE SURGEON CHANGED HIS MIND AND DECIDED TO MONITOR THE PATIENT. THE LENS REMAINS IMPLANTED. Manufac…	OD	Physician	05/08/2019	2019
https://www.accessdata.fda.gov/scripts/cdrh/cfdocs/cfMAUDE/Detail.CFM?MDRFOI__ID=14713784&pc=MTA	2023826-2022-01864	2022-05-16 04:00:00	Injury	STAAR SURGICAL COMPANY	2022-06-16 04:00:00	MTA	IMPLANTABLE COLLAMER LENS (ICL)	Misfocusing; Adverse Event Without Identified Device or Use Problem	Blurred Vision	P030016	Event Description: THE REPORTER INDICATED THAT A 12.6MM VICM5_12.6 IMPLANTABLE COLLAMER LENS OF -2.25 DIOPTER WAS IMPLANTED INTO THE PATIENT'S RIGHT EYE (OD) IN 2021. THE PATIENT EXPERIENCED REFRACTIVE CHANGE OVERTIME, LENS REMAINS IMPLANTED. IN THE REPORTERS OPINION THE CAUSE OF THIS EVENT IS UNKNOWN. IF ADDITIONAL INFORMATION IS RECEIVED A SUPPLEMENTAL MEDWATCH REPORT WILL BE SUBMITTED. Manufac…	OD	Physician	05/17/2022	2022	48	Male
https://www.accessdata.fda.gov/scripts/cdrh/cfdocs/cfMAUDE/Detail.CFM?MDRFOI__ID=14714037&pc=MTA	2023826-2022-01865	2022-05-16 04:00:00	Injury	STAAR SURGICAL COMPANY	2022-06-16 04:00:00	MTA	IMPLANTABLE COLLAMER LENS (ICL)	Misfocusing; Adverse Event Without Identified Device or Use Problem	Blurred Vision	P030016	Event Description: THE REPORTER INDICATED THAT A 12.6MM VICM5_12.6 IMPLANTABLE COLLAMER LENS OF -2.25 DIOPTER WAS IMPLANTED INTO THE PATIENT'S LEFT EYE (OS) IN 2021. THE PATIENT EXPERIENCED REFRACTIVE CHANGE OVERTIME, LENS REMAINS IMPLANTED. IN THE REPORTERS OPINION THE CAUSE OF THIS EVENT IS UNKNOWN. IF ADDITIONAL INFORMATION IS RECEIVED A SUPPLEMENTAL MEDWATCH REPORT WILL BE SUBMITTED. Manufact…	OS	Physician	05/17/2022	2022	48	Male
https://www.accessdata.fda.gov/scripts/cdrh/cfdocs/cfMAUDE/Detail.CFM?MDRFOI__ID=15557432&pc=MTA	2023826-2022-03451	2022-09-06 04:00:00	Injury	STAAR SURGICAL COMPANY	2022-10-06 04:00:00	MTA	IMPLANTABLE COLLAMER LENS (ICL)	Misfocusing; Adverse Event Without Identified Device or Use Problem	Blurred Vision		Event Description: THE REPORTER INDICATED THAT THE SURGEON OBSERVED REFRACTIVE CHANGE OVER TIME IN THE PATIENT'S RIGHT EYE (OD). Manufacturer Narrative: B5: THE REPORTER INDICATED THAT THE SURGEON IMPLANTED A 13.2MM VICM513.2 IMPLANTABLE COLLAMER LENS OF A -9.5 DIOPTER, WAS IMPLANTED INTO THE RIGHT EYE (OD) OF A PATIENT ON (B)(6) 2018. ON (B)(6) 2022, REFRACTIVE CHANGE OVER TIME WAS OBSERVED. CAU…	OD	Physician	09/08/2022	2022	28	Female
https://www.accessdata.fda.gov/scripts/cdrh/cfdocs/cfMAUDE/Detail.CFM?MDRFOI__ID=8941306&pc=MTA	2023826-2019-01580	2019-05-21	Malfunction	STAAR SURGICAL COMPANY	2019-08-28	MTA	IMPLANTABLE COLLAMER LENS	Misfocusing; Inadequacy of Device Shape and/or Size	Blurred Vision	NA	Event Description: THE REPORTER INDICATED THAT THE SURGEON IMPLANTED A 12.6MM VICM5_12.6 IMPLANTABLE COLLAMER LENS, -6.5 DIOPTER INTO THE PATIENT'S LEFT EYE (OS) ON (B)(6) 2019. THE SURGEON REPORTS LOW VAULT AND REFRACTIVE SURPRISE. THE CAUSE OF THE EVENT IS REPORTED AS UNKNOWN. REPORTEDLY, THE LENS REMAINS IMPLANTED. Manufacturer Narrative: WEIGHT, ETHNICITY, RACE: UNK. PRODUCT IS MANUFACTURED B…	OS	Physician	08/02/2019	2019	22
https://www.accessdata.fda.gov/scripts/cdrh/cfdocs/cfMAUDE/Detail.CFM?MDRFOI__ID=8941316&pc=MTA	2023826-2019-01579	2019-05-21	Malfunction	STAAR SURGICAL COMPANY	2019-08-28	MTA	IMPLANTABLE COLLAMER LENS	Misfocusing; Inadequacy of Device Shape and/or Size	Blurred Vision	NA	Event Description: THE REPORTER INDICATED THAT THE SURGEON IMPLANTED A 12.6MM VICM5_12.6 IMPLANTABLE COLLAMER LENS, -7.0 DIOPTER INTO THE PATIENT'S RIGHT EYE (OD) ON (B)(6) 2019. THE SURGEON REPORTS LOW VAULT AND REFRACTIVE SURPRISE. THE CAUSE OF THE EVENT IS REPORTED AS UNKNOWN. REPORTEDLY, THE LENS REMAINS IMPLANTED. Manufacturer Narrative: PRODUCT IS MANUFACTURED BUT NOT SOLD IN THE U.S. NO SI…	OD	Physician	08/02/2019	2019	22
https://www.accessdata.fda.gov/scripts/cdrh/cfdocs/cfMAUDE/Detail.CFM?MDRFOI__ID=8932874&pc=MTA	2023826-2019-01548	2019-07-17 04:00:00	Malfunction	STAAR SURGICAL COMPANY	2019-08-26 04:00:00	MTA	IMPLANTABLE COLLAMER LENS (ICL)	Misfocusing; Inadequacy of Device Shape and/or Size	Blurred Vision	NA	Event Description: THE REPORTER INDICATED THE SURGEON IMPLANTED A 13.2MM VICM5_13.2 IMPLANTABLE COLLAMER LENS, -03.00 DIOPTER, IN THE PATIENTS LEFT EYE (OS) ON (B)(6) 2019. THREE MONTHS LATER, THE PATIENT IS NOT SATISFIED WITH HIS VISUAL ACUITY AND COMPLAINS OF BLURRED VISION. THE LENS HAS LOW VAULTING AND REMAINS IMPLANTED. THE CAUSE OF THE EVENT IS PATIENT RELATED FACTOR. ADDITIONAL INFORMATION…	OS		07/29/2019	2019	41
https://www.accessdata.fda.gov/scripts/cdrh/cfdocs/cfMAUDE/Detail.CFM?MDRFOI__ID=10744678&pc=MTA	2023826-2020-02533	2020-08-20 04:00:00	Injury	STAAR SURGICAL COMPANY	2020-10-27 04:00:00	MTA	IMPLANTABLE COLLAMER LENS (ICL)	Misfocusing; Inadequacy of Device Shape and/or Size	Blurred Vision	NA	Event Description: THE REPORTER INDICATED THAT A 12.6MM, VICM5_12.6, -10.00 DIOPTER, IMPLANTABLE COLLAMER LENS WAS IMPLANTED INTO THE PATIENTS RIGHT EYE (OD) ON (B)(6) 2020. ON (B)(6) 2020 THE LENS WAS EXCHANGED FOR A SHORTER LENGTH AND DIFFERENT DIOPTER LENS DUE TO EXCESSIVE VAULT AND REFRACTIVE SURPRISE. THIS EXCHANGE RESOLVED THE PROBLEM. Manufacturer Narrative: H3- DEVICE EVALUATION: LENS WAS…	OD		09/28/2020	2020	49
https://www.accessdata.fda.gov/scripts/cdrh/cfdocs/cfMAUDE/Detail.CFM?MDRFOI__ID=10856354&pc=MTA	2023826-2020-02692	2020-09-23 04:00:00	Injury	STAAR SURGICAL COMPANY	2020-11-17 05:00:00	MTA	IMPLANTABLE COLLAMER LENS (ICL)	Misfocusing; Inadequacy of Device Shape and/or Size	Blurred Vision	N/A	Event Description: THE REPORTER INDICATED THAT THE SURGEON IMPLANTED A 13.2MM VICM5_13.2 IMPLANTABLE COLLAMER LENS, -13.5 DIOPTER INTO THE PATIENT'S LEFT EYE (OS) ON (B)(6) 2020. ON (B)(6) 2020 THE LENS WAS EXCHANGED WITH A SHORTER LENS, THE SURGEON REPORTING EXCESSIVE VAULT, REFRACTIVE SURPRISE, AND PERMANENT LOSS OF BCVA. THE PROBLEM WAS RESOLVED. THE CAUSE OF THE EVENT IS REPORTED AS OTHER: "1…	OS		10/21/2020	2020	43
https://www.accessdata.fda.gov/scripts/cdrh/cfdocs/cfMAUDE/Detail.CFM?MDRFOI__ID=11343188&pc=MTA	2023826-2021-00400	2021-01-14 05:00:00	Injury	STAAR SURGICAL COMPANY	2021-02-18 05:00:00	MTA	IMPLANTABLE COLLAMER LENS (ICL)	Misfocusing; Inadequacy of Device Shape and/or Size	Blurred Vision	N/A	Event Description: THE REPORTER INDICATED THAT A 12.6MM, VICM5_12.6, -10.00 DIOPTER, IMPLANTABLE COLLAMER LENS WAS IMPLANTED INTO THE PATIENT'S LEFT EYE (OS) ON (B)(6) 2021. LENS WAS EXPLANTED ON (B)(6) 2021 DUE TO REFRACTIVE SURPRISE AND EXCESSIVE VAULT. REPORTEDLY, "ADDITIAONAL REFRACTION INCLUDING CR WILL BE MEASURED. THEN, THE SURGEON WILL CONSIDER A REPLACEMENT SURGERY." ADDITIONAL INFORMATI…	OS		01/25/2021	2021	18
https://www.accessdata.fda.gov/scripts/cdrh/cfdocs/cfMAUDE/Detail.CFM?MDRFOI__ID=11343198&pc=MTA	2023826-2021-00399	2021-01-14 05:00:00	Injury	STAAR SURGICAL COMPANY	2021-02-18 05:00:00	MTA	IMPLANTABLE COLLAMER LENS (ICL)	Misfocusing; Inadequacy of Device Shape and/or Size	Blurred Vision	N/A	Event Description: THE REPORTER INDICATED THAT A 12.6MM, VICM5_12.6, -11.50 DIOPTER, IMPLANTABLE COLLAMER LENS WAS IMPLANTED INTO THE PATIENT'S RIGHT EYE (OD) ON (B)(6) 2021. LENS WAS EXPLANTED ON (B)(6)2021 DUE TO REFRACTIVE SURPRISE AND EXCESSIVE VAULT. REPORTEDLY, "ADDITIAONAL REFRACTION INCLUDING CR WILL BE MEASURED. THEN, THE SURGEON WILL CONSIDER A REPLACEMENT SURGERY." ADDITIONAL INFORMATI…	OD		01/25/2021	2021	18
https://www.accessdata.fda.gov/scripts/cdrh/cfdocs/cfMAUDE/Detail.CFM?MDRFOI__ID=12214206&pc=MTA	2023826-2021-02660	2021-06-29 04:00:00	Injury	STAAR SURGICAL COMPANY	2021-07-22 04:00:00	MTA	IMPLANTABLE COLLAMER LENS (ICL)	Misfocusing; Inadequacy of Device Shape and/or Size	Blurred Vision	N/A	Event Description: THE REPORTER INDICATED THAT THE SURGEON IMPLANTED A 13.2MM VICM613.2, -06.50 DIOPTER, IMPLANTABLE COLLAMER LENS INTO THE PATIENT'S RIGHT EYE (OD) ON (B)(6) 2021 . THE LENS WAS REPLACED WITH A SHORTER LENGTH LENS DUE TO REFRACTIVE SURPRISE AND EXCESSIVE VAULT ON (B)(6) 2021. REPORTEDLY, VAULT IS OK NOW AND PATIENT IS MORE HAPPY WITH DISTANCE AND NEAR VISION. PATIENT UNDER OBSERV…	OD	Physician	06/29/2021	2021	45	Female
https://www.accessdata.fda.gov/scripts/cdrh/cfdocs/cfMAUDE/Detail.CFM?MDRFOI__ID=12214232&pc=MTA	2023826-2021-02659	2021-06-29 04:00:00	Injury	STAAR SURGICAL COMPANY	2021-07-22 04:00:00	MTA	IMPLANTABLE COLLAMER LENS (ICL)	Misfocusing; Inadequacy of Device Shape and/or Size	Blurred Vision	N/A	Event Description: THE REPORTER INDICATED THAT THE SURGEON IMPLANTED A 13.2MM VICM613.2, -06.00 DIOPTER, IMPLANTABLE COLLAMER LENS INTO THE PATIENT'S RIGHT EYE (OD) ON (B)(6) 2021. THE LENS WAS REPLACED WITH A SHORTER LENGTH LENS DUE TO REFRACTIVE SURPRISE AND EXCESSIVE VAULT ON (B)(6) 2021. REPORTEDLY, VAULT IS OK NOW AND PATIENT IS MORE HAPPY WITH DISTANCE AND NEAR VISION. PATIENT UNDER OBSERVA…	OD	Physician	06/29/2021	2021	45	Female
https://www.accessdata.fda.gov/scripts/cdrh/cfdocs/cfMAUDE/Detail.CFM?MDRFOI__ID=14220828&pc=MTA	2023826-2022-01102	2022-02-01 05:00:00	Injury	STAAR SURGICAL COMPANY	2022-04-27 04:00:00	MTA	IMPLANTABLE COLLAMER LENS (ICL)	Misfocusing; Inadequacy of Device Shape and/or Size	Blurred Vision	P030016	Event Description: THE REPORTER INDICATED THAT A 13.7MM VICMO13.7 IMPLANTABLE COLLAMER LENS OF -13.00 DIOPTER WAS IMPLANTED INTO THE PATIENT'S LEFT EYE (OS) ON (B)(6) 2022. EXCESSIVE VAULT AND REFRACTIVE SURPRISE WERE REPORTED. LENS REMAINS IMPLANTED. CAUSE IS REPORTED AS USER ERROR - ICL 13.7 INSTEAD OF 12.6. Manufacturer Narrative: WEIGHT:UNKNOWN, ETHINICITY:UNKNOWN,RACE:UNKNOWN. THIS PRODUCT I…	OS	Physician	10/05/2022	2022	35	Female
https://www.accessdata.fda.gov/scripts/cdrh/cfdocs/cfMAUDE/Detail.CFM?MDRFOI__ID=14649879&pc=MTA	2023826-2022-01839	2022-02-13 05:00:00	Injury	STAAR SURGICAL COMPANY	2022-06-09 04:00:00	MTA	IMPLANTABLE COLLAMER LENS (ICL)	Misfocusing; Inadequacy of Device Shape and/or Size	Blurred Vision	P030016	Event Description: THE REPORTER INDICATED THAT THE SURGEON IMPLANTED A 12.6MM VICMO12.6; -12.0 DIOPTER IMPLANTABLE COLLAMER LENS INTO THE PATIENT'S RIGHT EYE (OD) ON (B)(6) 2022. THE PATIENT EXPERIENCED LOW VAULTING AND REFRACTIVE SURPRISE. ON (B)(6) 2022 THE LENS WAS EXCHANGED WITH A LONGER LENGTH LENS AND DIFFERENT MODEL. THIS RESOLVED THE PROBLEM. IT WAS ALSO NOTED "THE PATIENT'S RIGHT EYE HAD…	OD	Physician	06/07/2022	2022	32	Female
https://www.accessdata.fda.gov/scripts/cdrh/cfdocs/cfMAUDE/Detail.CFM?MDRFOI__ID=14862479&pc=MTA	2023826-2022-01906	2022-05-31 04:00:00	Injury	STAAR SURGICAL COMPANY	2022-06-29 04:00:00	MTA	IMPLANTABLE COLLAMER LENS (ICL)	Misfocusing; Inadequacy of Device Shape and/or Size	Blurred Vision	P030016	Event Description: THE REPORTER INDICATED THAT A 12.6MM VICM5_12.6 IMPLANTABLE COLLAMER LENS OF -8.5 DIOPTER WAS IMPLANTED INTO THE PATIENT'S RIGHT EYE (OD) ON (B)(6) 2021. REFRACTIVE SURPRISE REPORTED. REPORTEDLY RESIDUAL ASTIGMATISM WAS CORRECTED BY INCISION. THE LENS REMAINS IMPLANTED. Manufacturer Narrative: B5 - "ON (B)(6) 2022 THE LENS WAS EXCHANGED FOR A SAME MODEL/LONGER LENGTH LENS DUE T…	OD	Physician	06/13/2022	2022	25	Female
https://www.accessdata.fda.gov/scripts/cdrh/cfdocs/cfMAUDE/Detail.CFM?MDRFOI__ID=16109368&pc=MTA	2023826-2023-00085	2022-08-04 04:00:00	Injury	STAAR SURGICAL COMPANY	2023-01-05 05:00:00	MTA	IMPLANTABLE COLLAMER LENS (ICL)	Misfocusing; Inadequacy of Device Shape and/or Size	Blurred Vision	P030016	Event Description: THE REPORTER INDICATED THAT THE SURGEON IMPLANTED A 12.6MM VICMO12.6; -4.0 DIOPTER IMPLANTABLE COLLAMER LENS INTO THE PATIENT'S RIGHT EYE (OD) ON (B)(6) 2016. THE PATIENT EXPERIENCED LOW VAULTING AND REFRACTIVE CHANGE OVER TIME. LENS REMAINS IMPLANTED. CAUSE OF THE EVENT WAS REPORTED AS UNKNOWN. Manufacturer Narrative: ADDITIONAL INFORMATION: B5: ON (B)(6) 2023 THE LENS WAS REP…	OD	Physician	12/13/2022	2022	44	Female
https://www.accessdata.fda.gov/scripts/cdrh/cfdocs/cfMAUDE/Detail.CFM?MDRFOI__ID=16109425&pc=MTA	2023826-2023-00086	2022-08-04 04:00:00	Injury	STAAR SURGICAL COMPANY	2023-01-05 05:00:00	MTA	IMPLANTABLE COLLAMER LENS (ICL)	Misfocusing; Inadequacy of Device Shape and/or Size	Blurred Vision	P030016	Event Description: THE REPORTER INDICATED THAT THE SURGEON IMPLANTED A 12.6MM VICMO12.6; -4.50 DIOPTER IMPLANTABLE COLLAMER LENS INTO THE PATIENT'S LEFT EYE (OS) ON (B)(6) 2016. THE PATIENT EXPERIENCED LOW VAULTING AND REFRACTIVE CHANGE OVER TIME. LENS REMAINS IMPLANTED. CAUSE OF THE EVENT WAS REPORTED AS UNKNOWN. Manufacturer Narrative: ADDITIONAL INFORMATION: B5: ON (B)(6) 2023 THE LENS WAS REP…	OS	Physician	12/13/2022	2022	44	Female
https://www.accessdata.fda.gov/scripts/cdrh/cfdocs/cfMAUDE/Detail.CFM?MDRFOI__ID=15588754&pc=MTA	2023826-2022-03592	2022-09-06 04:00:00	Injury	STAAR SURGICAL COMPANY	2022-10-12 04:00:00	MTA	IMPLANTABLE COLLAMER LENS (ICL)	Misfocusing; Inadequacy of Device Shape and/or Size	Blurred Vision	P030016	Event Description: THE REPORTER INDICATED THAT AN IMPLANTABLE COLLAMER LENS WAS IMPLANTED INTO THE PATIENTS EYE AND THE PATIENT EXPERIENCED EXCESSIVE VAULT AND REFRACTIVE SURPRISE, LENS REMAINS IMPLANTED. ADDITIONAL INFORMATION HAS BEEN REQUESTED BUT NONE HAS BEEN FORTHCOMING. IF ADDITIONAL INFORMATION IS RECEIVED A SUPPLEMENTAL MEDWATCH REPORT WILL BE SUBMITTED. Manufacturer Narrative: DATE OF E…	OD	Physician	09/13/2022	2022	49	Female
https://www.accessdata.fda.gov/scripts/cdrh/cfdocs/cfMAUDE/Detail.CFM?MDRFOI__ID=15588810&pc=MTA	2023826-2022-03593	2022-09-06 04:00:00	Injury	STAAR SURGICAL COMPANY	2022-10-12 04:00:00	MTA	IMPLANTABLE COLLAMER LENS (ICL)	Misfocusing; Inadequacy of Device Shape and/or Size	Blurred Vision	P030016	Event Description: THE REPORTER INDICATED THAT AN IMPLANTABLE COLLAMER LENS WAS IMPLANTED INTO THE PATIENTS EYE AND THE PATIENT EXPERIENCED EXCESSIVE VAULT AND REFRACTIVE SURPRISE, LENS REMAINS IMPLANTED. ADDITIONAL INFORMATION HAS BEEN REQUESTED BUT NONE HAS BEEN FORTHCOMING. IF ADDITIONAL INFORMATION IS RECEIVED A SUPPLEMENTAL MEDWATCH REPORT WILL BE SUBMITTED. Manufacturer Narrative: B5: THE R…	OS	Physician	09/13/2022	2022	49	Female
https://www.accessdata.fda.gov/scripts/cdrh/cfdocs/cfMAUDE/Detail.CFM?MDRFOI__ID=15810735&pc=MTA	2023826-2022-04175	2022-10-10 04:00:00	Injury	STAAR SURGICAL COMPANY	2022-11-16 05:00:00	MTA	IMPLANTABLE COLLAMER LENS (ICL)	Misfocusing; Inadequacy of Device Shape and/or Size	Blurred Vision	P030016	Event Description: THE REPORTER INDICATED THAT THE SURGEON IMPLANTED A 12.6MM VICM5_12.6; -03.50 DIOPTER IMPLANTALE COLLAMER LENS INTO THE PATIENT'S RIGHT EYE (OD) ON (B)(6) 2022. THE PATIENT EXPERIENCED LOW VAULTING AND REFRACTIVE SURPRISE. ON (B)(6) 2022 THE LENS WAS EXCHANGED WITH A LONGER LENGTH LENS BUT THE PROBLEM WAS NOT RESOLVED. SEE MFR# 2023826-2022-04176 FOR REPLACEMENT LENS CLAIM. Man…	OD	Physician	10/21/2022	2022	39	Female
https://www.accessdata.fda.gov/scripts/cdrh/cfdocs/cfMAUDE/Detail.CFM?MDRFOI__ID=15811248&pc=MTA	2023826-2022-04177	2022-10-25 04:00:00	Injury	STAAR SURGICAL COMPANY	2022-11-16 05:00:00	MTA	IMPLANTABLE COLLAMER LENS (ICL)	Misfocusing; Inadequacy of Device Shape and/or Size	Blurred Vision	P030016	Event Description: THE REPORTER INDICATED THAT THE SURGEON IMPLANTED A 13.7MM VICM5_13.7; -12.00 DIOPTER IMPLANTABLE COLLAMER LENS INTO THE PATIENT'S RIGHT EYE (OD) ON (B)(6) 2018. THE PATIENT NOW HAS EXPERIENCED LOW VAULTING AND REFRACTIVE CHANGE OVER TIME. LENS REMAINS IMPLANTED. CAUSE OF THE EVENT WAS REPORTED AS UNKNOWN. IF ADDITIONAL INFORMATION IS RECEIVED A SUPPLEMENTAL MEDWATCH REPORT WIL…	OD	Physician	11/07/2022	2022	58	Male
https://www.accessdata.fda.gov/scripts/cdrh/cfdocs/cfMAUDE/Detail.CFM?MDRFOI__ID=16865570&pc=MTA	2023826-2023-01628	2023-02-04 05:00:00	Injury	STAAR SURGICAL COMPANY	2023-05-03 04:00:00	MTA	IMPLANTABLE COLLAMER LENS (ICL)	Misfocusing; Inadequacy of Device Shape and/or Size	Blurred Vision	P030016	Event Description: THE REPORTER INDICATED THAT A 12.6MM VICM512.6 IMPLANTABLE COLLAMER LENS OF A -12.0 DIOPTER WAS IMPLANTED INTO THE PATIENT'S RIGHT EYE (OD) ON (B)(6) 2022. ON (B)(6) 2023, THE LENS WAS EXCHANGED FOR A SHORTER LENGTH LENS DUE TO REFRACTIVE SURPRISE AND EXCESSIVE VAULT. THE PROBLEM WAS RESOLVED. THE CAUSE OF THE EVENT IS UNKNOWN. Manufacturer Narrative: H3: DEVICE EVALUATION - LE…	OD	Physician	04/03/2023	2023		Female
https://www.accessdata.fda.gov/scripts/cdrh/cfdocs/cfMAUDE/Detail.CFM?MDRFOI__ID=16865571&pc=MTA	2023826-2023-01627	2023-02-04 05:00:00	Injury	STAAR SURGICAL COMPANY	2023-05-03 04:00:00	MTA	IMPLANTABLE COLLAMER LENS (ICL)	Misfocusing; Inadequacy of Device Shape and/or Size	Blurred Vision	P030016	Event Description: THE REPORTER INDICATED THAT A 12.6MM VICM512.6 IMPLANTABLE COLLAMER LENS OF A -12.0 DIOPTER WAS IMPLANTED INTO THE PATIENT'S LEFT EYE (OS) ON (B)(6) 2022. ON (B)(6) 2023, THE LENS WAS EXCHANGED FOR A SHORTER LENGTH LENS DUE TO REFRACTIVE SURPRISE AND EXCESSIVE VAULT. THE PROBLEM WAS RESOLVED. THE CAUSE OF THE EVENT IS UNKNOWN. Manufacturer Narrative: H6: WORK ORDER SEARCH FOUND…	OS	Physician	04/03/2023	2023		Female
https://www.accessdata.fda.gov/scripts/cdrh/cfdocs/cfMAUDE/Detail.CFM?MDRFOI__ID=17193864&pc=MTA	2023826-2023-02529	2023-05-17 04:00:00	Injury	STAAR SURGICAL COMPANY	2023-06-23 04:00:00	MTA	IMPLANTABLE COLLAMER LENS (ICL)	Misfocusing; Inadequacy of Device Shape and/or Size	Blurred Vision	P030016	Event Description: THE REPORTER INDICATED THAT A 13.7MM VICM5_13.7 IMPLANTABLE COLLAMER LENS OF -11.00 DIOPTER WAS IMPLANTED INTO THE PATIENT'S LEFT EYE (OS) ON (B)(6) 2023. ON (B)(6) 2023 THE LENS WAS EXCHANGED FOR A SHORTER LENGTH LENS OF DIFFERENT POWER DUE TO EXCESSIVE VAULT AND REFRACTIVE SURPRISE AND THE PROBLEM RESOLVED. CAUSE OF EVENT WAS UNKNOWN. Manufacturer Narrative: H3: DEVICE EVALUA…	OS	Other Health Care Professional	05/25/2023	2023	29	Male
https://www.accessdata.fda.gov/scripts/cdrh/cfdocs/cfMAUDE/Detail.CFM?MDRFOI__ID=17302269&pc=MTA	2023826-2023-02759	2023-05-30 04:00:00	Injury	STAAR SURGICAL COMPANY	2023-07-11 04:00:00	MTA	IMPLANTABLE COLLAMER LENS (ICL)	Misfocusing; Inadequacy of Device Shape and/or Size	Blurred Vision	P030016	Event Description: THE REPORTER INDICATED THAT A,12.6MM VICM512.6 IMPLANTABLE COLLAMER LENS OF -6.5 DIOPTER WAS IMPLANTED INTO THE PATIENT'S RIGHT EYE (OD) ON (B)(6) 2023. EXCESSIVE VAULT AND BIG PUPIL, PHOTOPHOBIA, AND BLURRED VISION WERE OBSERVED. REPORTEDLY, "NO CORRELATION BETWEEN WTW, SULCUS-SULCUS AND ICL SIZE." THE PROBLEM WAS NOT RESOLVED. THE REPORTER ALSO STATED, "PENDING EXCHANGE ICL."…	OD	Physician	06/23/2023	2023	26	Female
https://www.accessdata.fda.gov/scripts/cdrh/cfdocs/cfMAUDE/Detail.CFM?MDRFOI__ID=17344449&pc=MTA	2023826-2023-02859	2023-06-24 04:00:00	Malfunction	STAAR SURGICAL COMPANY	2023-07-18 04:00:00	MTA	IMPLANTABLE COLLAMER LENS (ICL)	Misfocusing; Inadequacy of Device Shape and/or Size	Blurred Vision	P030016	Event Description: THE REPORTER INDICATED THAT THE SURGEON IMPLANTED A 13.2MM VICM5 13.2, -13.00 DIOPTER, IMPLANTABLE COLLAMER LENS INTO THE PATIENT'S RIGHT EYE (OD) IN (B)(6) 2023. REFRACTIVE SURPRISE AND EXCESSIVE VAULT WERE OBSERVED. LENS REMAINS IMPLANTED. CAUSE OF THE EVENT IS REPORTED AS UNKNOWN. PROBLEM NOT RESOLVED. ADDITIONAL INFORMATION HAS BEEN REQUESTED BUT NONE HAS BEEN FORTHCOMING. …	OD	Physician	06/29/2023	2023	41	Female
https://www.accessdata.fda.gov/scripts/cdrh/cfdocs/cfMAUDE/Detail.CFM?MDRFOI__ID=17344451&pc=MTA	2023826-2023-02860	2023-06-24 04:00:00	Malfunction	STAAR SURGICAL COMPANY	2023-07-18 04:00:00	MTA	IMPLANTABLE COLLAMER LENS (ICL)	Misfocusing; Inadequacy of Device Shape and/or Size	Blurred Vision	P030016	Event Description: THE REPORTER INDICATED THAT THE SURGEON IMPLANTED A 13.2MM VICM5 13.2, -6.5 DIOPTER, IMPLANTABLE COLLAMER LENS INTO THE PATIENT'S LEFT EYE (OS) IN (B)(6) 2023. REFRACTIVE SURPRISE AND EXCESSIVE VAULT WERE OBSERVED. LENS REMAINS IMPLANTED. CAUSE OF THE EVENT IS REPORTED AS UNKNOWN. PROBLEM NOT RESOLVED. ADDITIONAL INFORMATION HAS BEEN REQUESTED BUT NONE HAS BEEN FORTHCOMING. Man…	OS	Physician	06/29/2023	2023	41	Female
https://www.accessdata.fda.gov/scripts/cdrh/cfdocs/cfMAUDE/Detail.CFM?MDRFOI__ID=17591904&pc=MTA	2023826-2023-03631	2023-06-27 04:00:00	Injury	STAAR SURGICAL COMPANY	2023-08-21 04:00:00	MTA	IMPLANTABLE COLLAMER LENS (ICL)	Misfocusing; Inadequacy of Device Shape and/or Size	Blurred Vision	P030016	Event Description: THE REPORTER INDICATED THAT THE SURGEON IMPLANTED A 12.6MM MICL12.6; -11.5 DIOPTER IMPLANTABLE COLLAMER LENS INTO THE PATIENT'S LEFT EYE (OS) ON (B)(6) 2015. IT WAS INDICATED THAT THE PATIENT EXPERIENCED REFRACTIVE CHANGE WHICH WAS ASSESSED ON (B)(6) 2023, THE PATIENT ALSO HAD LOW VAULTING WITH NO ROTATION. ON (B)(6) 2023 THE LENS WAS EXCHANGED WITH A LONGER LENGTH DIFFERENT PO…	OS	Physician	07/27/2023	2023	40	Male
https://www.accessdata.fda.gov/scripts/cdrh/cfdocs/cfMAUDE/Detail.CFM?MDRFOI__ID=18017240&pc=MTA	2023826-2023-04814	2023-07-31 04:00:00	Injury	STAAR SURGICAL COMPANY	2023-10-26 04:00:00	MTA	IMPLANTABLE COLLAMER LENS (ICL)	Misfocusing; Inadequacy of Device Shape and/or Size	Blurred Vision	P030016	Event Description: THE REPORTER INDICATED THAT THE SURGEON IMPLANTED A 12.6MM VICMO12.6; -6.0 DIOPTER IMPLANTABLE COLLAMER LENS INTO THE PATIENT'S LEFT EYE (OS) ON (B)(6) 2023. THE PATIENT EXPERIENCED LOW VAULTING AND REFRACTIVE SURPRISE. ON (B)(6) 2023 THE LENS WAS EXCHANGED WITH A LONGER LENGTH DIFFERENT POWER LENS AND THIS RESOLVED THE PROBLEM. THE CAUSE OF THE EVENT WAS REPORTED AS UNKNOWN. M…	OS	Physician	10/24/2023	2023	28	Female
https://www.accessdata.fda.gov/scripts/cdrh/cfdocs/cfMAUDE/Detail.CFM?MDRFOI__ID=17986858&pc=MTA	2023826-2023-04599	2023-09-02 04:00:00	Injury	STAAR SURGICAL COMPANY	2023-10-23 04:00:00	MTA	IMPLANTABLE COLLAMER LENS (ICL)	Misfocusing; Inadequacy of Device Shape and/or Size	Blurred Vision	P030016	Event Description: THE REPORTER INDICATED THAT THE SURGEON IMPLANTED A 12.1MM VICM5 12.1, -9.0 DIOPTER, IMPLANTABLE COLLAMER LENS INTO THE PATIENT'S LEFT EYE (OS) ON (B)(6) 2023. THE LENS WAS REPLACED WITH A LONGER LENGTH DIFFERENT POWER LENS (SPHERE/CYLINDER/AXIS) DUE TO REFRACTIVE SURPRISE AND LOW VAULT ON (B)(6) 2023. THIS RESOLVED THE PROBLEM. CAUSE OF THE EVENT IS REPORTED AS UNKNOWN. Manufa…	OS	Physician Assistant	10/02/2023	2023	37	Female
https://www.accessdata.fda.gov/scripts/cdrh/cfdocs/cfMAUDE/Detail.CFM?MDRFOI__ID=11375703&pc=MTA	2023826-2021-00501		Malfunction	STAAR SUGICAL COMPANY	2021-02-24	MTA	IMPLANTABLE COLLAMER LENS (ICL)	Misfocusing; Inadequacy of Device Shape and/or Size	Blurred Vision	NA	Event Description: THE REPORTER STATED THAT A 12.6MM, VICM5_12.6, -4.00 DIOPTER, IMPLANTABLE COLLAMER LENS WAS IMPLANTED IN (B)(6) 2019, THE SURGEON NOTED REFRACTIVE SURPRISE OF -1.25D ALTHOUGH THEY EXPECTED 0D. IN ADDITION THE LENS WAS SMALL AND THEY NOTICED LOW VAULTING. LENS REMAINS IMPLANTED. ADDITIONAL INFORMATION HAS BEEN REQUESTED BUT NONE HAS BEEN FORTHCOMING. IF ADDITIONAL INFORMATION IS…	NA	Physician	01/25/2021	2021
https://www.accessdata.fda.gov/scripts/cdrh/cfdocs/cfMAUDE/Detail.CFM?MDRFOI__ID=8261656&pc=MTA	2023826-2019-00159		Malfunction	STAAR SURGICAL COMPANY	2019-01-18	MTA	IMPLANTABLE COLLAMER LENS (ICL)	Misfocusing; Inadequacy of Device Shape and/or Size	Blurred Vision	N/A	Event Description: (OS) LEFT EYE: THE REPORTER INDICATED THAT ON (B)(6) 2018 THE SURGEON SEEN PATIENT WHO WAS SEEKING REFRACTIVE SURGERY. UPON EXAMINATION, THE PATIENTS UNCORRECTED DISTANCE VISUAL ACUITY WAS COUNTING FINGERS AT 2 METERS OF CORRECTED 20/22 IN EACH EYE THE PATIENT WAS MYOPIC AND PRESBYOPIA AND WAS THOROUGHLY EXPLAINED TO PATIENT BEFORE SURGERY. ON (B)(6) 2018, THE PATIENT HAD UNDER…	OS	Physician	12/20/2018	2018
https://www.accessdata.fda.gov/scripts/cdrh/cfdocs/cfMAUDE/Detail.CFM?MDRFOI__ID=8261800&pc=MTA	2023826-2019-00160		Malfunction	STAAR SURGICAL COMPANY	2019-01-18 05:00:00	MTA	IMPLANTABLE COLLAMER LENS (ICL)	Misfocusing; Inadequacy of Device Shape and/or Size	Blurred Vision	N/A	Event Description: (OD) RIGHT EYE: THE REPORTER INDICATED THAT ON (B)(6) 2018 THE SURGEON SEEN PATIENT WHO WAS SEEKING REFRACTIVE SURGERY. UPON EXAMINATION, THE PATIENTS UNCORRECTED DISTANCE VISUAL ACUITY WAS COUNTING FINGERS AT 2 METERS OF CORRECTED 20/22 IN EACH EYE THE PATIENT WAS MYOPIC AND PRESBYOPIA AND WAS THOROUGHLY EXPLAINED TO PATIENT BEFORE SURGERY. ON (B)(6) 2018, THE PATIENT HAD UNDE…	OD		12/26/2018	2018
https://www.accessdata.fda.gov/scripts/cdrh/cfdocs/cfMAUDE/Detail.CFM?MDRFOI__ID=10491987&pc=MTA	2023826-2020-01957		Injury	STAAR SURGICAL COMPANY	2020-09-03 04:00:00	MTA	IMPLANTABLE COLLAMER LENS (ICL)	Misfocusing; Inadequacy of Device Shape and/or Size	Blurred Vision	N/A	Event Description: THE REPORTER INDICATED THAT THE SURGEON IMPLANTED A 13.2MM MICL13.2 IMPLANTABLE COLLAMER LENS, -14.5 DIOPTER, INTO THE PATIENT'S RIGHT (OD) EYE. THE SURGEON REPORTS AN UNEXPECTED REFRACTIVE RESULT WITH ANTERIOR VAULT. ATTEMPTS TO OBTAIN ADDITIONAL INFORMATION HAVE NOT BEEN SUCCESSFUL. Manufacturer Narrative: ADDITIONAL INFORMATION: H3- DEVICE EVALUATION: LENS WAS RETURNED DRY I…	OD		08/06/2020	2020
https://www.accessdata.fda.gov/scripts/cdrh/cfdocs/cfMAUDE/Detail.CFM?MDRFOI__ID=10931407&pc=MTA	2023826-2020-02739		Malfunction	STAAR SURGICAL COMPANY	2020-12-02 05:00:00	MTA	IMPLANTABLE COLLAMER LENS (ICL)	Misfocusing; Inadequacy of Device Shape and/or Size	Blurred Vision	N/A	Event Description: THE REPORTER INDICATED THAT REFREACTIVE SURPRISE HAS BEEN OBSERVED IN PATIENT. ADDITIONAL INFORMATION HAS BEEN REQUESTED BUT NONE HAS BEEN FORTHCOMING. IF ADDITIONAL INFORMATION IS RECEIVED A SUPPLEMENTAL MEDWATCH REPORT WILL BE SUBMITTED. Manufacturer Narrative: ADDITIONAL INFORMATION: B5 - THE REPORTER INDICATED THAT A 13.2MM, VICMO13.2, -15.50 DIOPTER, IMPLANTABLE COLLAMER L…	OS		11/06/2020	2020
https://www.accessdata.fda.gov/scripts/cdrh/cfdocs/cfMAUDE/Detail.CFM?MDRFOI__ID=12119243&pc=MTA	2023826-2021-02332		Injury	STAAR SURGICAL COMPANY	2021-07-05 04:00:00	MTA	IMPLANTABLE COLLAMER LENS	Misfocusing; Inadequacy of Device Shape and/or Size	Blurred Vision	NA	Event Description: THE REPORTER INDICATED THAT THE SURGEON IMPLANTED A 12.6MM VICMO12.6 IMPLANTABLE COLLAMER LENS, -10.0 DIOPTER INTO THE PATIENT'S RIGHT EYE (OD) ON (B)(6) 2020. THE SURGEON REPORTS 0 VAULT AND SLIGHTLY BLURRY VISION. REPORTEDLY, THE LENS REMAINS IMPLANTED. Manufacturer Narrative: B5: ADDITIONAL INFORMATION: THE REASON FOR THE REPLACEMENT LENS IS "LOW ARCH AND HIGH". THE PATIENT …	OD		06/07/2021	2021
https://www.accessdata.fda.gov/scripts/cdrh/cfdocs/cfMAUDE/Detail.CFM?MDRFOI__ID=12457498&pc=MTA	2023826-2021-03551		Malfunction	STAAR SURGICAL COMPANY	2021-09-10 04:00:00	MTA	IMPLANTABLE COLLAMER LENS (ICL)	Misfocusing; Inadequacy of Device Shape and/or Size	Blurred Vision	P030016	Event Description: THE REPORTER INDICATED THAT THE SURGEON IMPLANTED AN MICL IMPLANTABLE COLLAMER LENS, -10.5 DIOPTER INTO THE PATIENT'S EYE. THE SURGEON REPORTS "300% VAULT" AND +2.00D HYPEROPIC OUTCOME. ATTEMPTS TO OBTAIN ADDITIONAL INFORMATION HAVE NOT BEEN SUCCESSFUL. Manufacturer Narrative: B5: ADDITIONAL INFORMATION: REPORTEDLY THE PATIENT CONTINUES TO IMPROVE AND SO THE DATA IS SHIFTING. C…	NA	Physician	08/16/2021	2021
https://www.accessdata.fda.gov/scripts/cdrh/cfdocs/cfMAUDE/Detail.CFM?MDRFOI__ID=15964379&pc=MTA	2023826-2022-04176		Malfunction	STAAR SURGICAL COMPANY	2022-12-12 05:00:00	MTA	IMPLANTABLE COLLAMER LENS (ICL)	Misfocusing; Inadequacy of Device Shape and/or Size	Blurred Vision	P030016	Event Description: THE REPORTER INDICATED THAT THE SURGEON IMPLANTED A 13.2MM VICM5_13.2; -03.50 DIOPTER IMPLANTABLE COLLAMER LENS INTO THE PATIENT'S RIGHT EYE (OD) ON (B)(6) 2022; AS A REPLACEMENT LENS. IT WAS INDICATED THAT THE PATIENT EXPERIENCED LOW VAULTING WITH RESIDUAL ASTIGMATISM. LENS REMAINS IMPLANTED. Manufacturer Narrative: CORRECTED DATA: G2: "OTHER: ITALY" SHOULD BE CORRECTED TO "OT…	OD	Physician	11/16/2022	2022		Female
https://www.accessdata.fda.gov/scripts/cdrh/cfdocs/cfMAUDE/Detail.CFM?MDRFOI__ID=16739724&pc=MTA	2023826-2023-01368		Injury	STAAR SURGICAL COMPANY	2023-04-13 04:00:00	MTA	IMPLANTABLE COLLAMER LENS (ICL)	Misfocusing; Inadequacy of Device Shape and/or Size	Blurred Vision	P030016	Event Description: THE REPORTER INDICATED THAT THE SURGEON IMPLANTED AN IMPLANTABLE COLLAMER LENS INTO THE PATIENT'S LEFT EYE (OS). THE SURGEON REPORTS THERE IS ZERO VAULTING WITH REFRACTIVE CHANGE OVER TIME. LENS REMAINS IMPLANTED. ATTEMPTS TO OBTAIN ADDITIONAL INFORMATION HAVE NOT BEEN SUCCESSFUL. IF ADDITIONAL INFORMATION IS RECEIVED A SUPPLEMENTAL MEDWATCH REPORT WILL BE SUBMITTED. Manufactur…	OS	Physician	03/22/2023	2023
https://www.accessdata.fda.gov/scripts/cdrh/cfdocs/cfMAUDE/Detail.CFM?MDRFOI__ID=16924450&pc=MTA	2023826-2023-01822		Injury	STAAR SURGICAL COMPANY	2023-05-12 04:00:00	MTA	IMPLANTABLE COLLAMER LENS (ICL)	Misfocusing; Inadequacy of Device Shape and/or Size	Blurred Vision	P030016	Event Description: THE REPORTER INDICATED THAT THE SURGEON IMPLANTED A 12.1MM VICM5_12.; -9.00 DIOPTER IMPLANTABLE COLLAMER LENS INTO THE PATIENT'S LEFT EYE (OS) ON (B)(6) 2021. THE PATIENT EXPERIENCED LOW VAULTING WITH REFRACTIVE SURPRISE. ON (B)(6) 2023 THE LENS WAS EXCHANGED WITH A LONGER LENGTH, DIFFERENT MODEL/POWER LENS AND THE PROBLEM WAS RESOLVED. Manufacturer Narrative: ADDITIONAL INFORM…	OS	Physician	04/26/2023	2023		Male
https://www.accessdata.fda.gov/scripts/cdrh/cfdocs/cfMAUDE/Detail.CFM?MDRFOI__ID=17484564&pc=MTA	2023826-2023-03356		Injury	STAAR SURGICAL COMPANY	2023-08-08 04:00:00	MTA	IMPLANTABLE COLLAMER LENS (ICL)	Misfocusing; Inadequacy of Device Shape and/or Size	Blurred Vision	P030016	Event Description: THE REPORTER INDICATED THAT A 12.6MM VTICM5_12.6 IMPLANTABLE COLLAMER LENS OF -13.50 DIOPTER WAS IMPLANTED INTO THE PATIENT'S RIGHT EYE (OD) ON (B)(6) 2023. PATIENTS VISION AFTER SURGERY WAS 20/50 +1 WITH VAULT AROUND 1000. AFTER 2 WEEKS WITH NO VISUAL IMPROVEMENT, THE LENS WAS EXCHANGED FOR A TORIC LENS OF SHORTER LENGTH AND DIFFERENT POWER. IF ADDITIONAL INFORMATION IS RECEIV…	OD	Other Health Care Professional	07/12/2023	2023
https://www.accessdata.fda.gov/scripts/cdrh/cfdocs/cfMAUDE/Detail.CFM?MDRFOI__ID=17894899&pc=MTA	2023826-2023-04407		Injury	STAAR SURGICAL COMPANY	2023-10-09 04:00:00	MTA	IMPLANTABLE COLLAMER LENS (ICL)	Misfocusing; Inadequacy of Device Shape and/or Size	Blurred Vision	P030016	Event Description: THE REPORTER INDICATED THAT THE SURGEON IMPLANTED A 12.6MM VICM5 12.6, -6.5 DIOPTER, IMPLANTABLE COLLAMER LENS INTO THE PATIENT'S LEFT EYE (OS) ON (B)(6) 2020. REFRACTIVE CHANGE OVERTIME WAS OBSERVED. LENS REMAINS IMPLANTED. CAUSE OF THE EVENT IS REPORTED AS UNKNOWN. ADDITIONAL INFORMATION HAS BEEN REQUESTED BUT NONE HAS BEEN FORTHCOMING. Manufacturer Narrative: ADDITIONAL INFO…	OS	Physician	09/22/2023	2023		Female
https://www.accessdata.fda.gov/scripts/cdrh/cfdocs/cfMAUDE/Detail.CFM?MDRFOI__ID=17981074&pc=MTA	2023826-2023-04657		Injury	STAAR SURGICAL COMPANY	2023-10-20 04:00:00	MTA	IMPLANTABLE COLLAMER LENS (ICL)	Misfocusing; Inadequacy of Device Shape and/or Size	Blurred Vision	P030016	Event Description: THE REPORTER INDICATED THAT A 12.6MM VICM5 12.6 IMPLANTABLE COLLAMER LENS OF -3.50 DIOPTER WAS IMPLANTED INTO THE LEFT EYE (OS) ON (B)(6) 2022. LOW VAULT WITH REFRACTIVE CHANGE OVER TIME WAS REPORTED. LENS REMAINS IMPLANTED. CAUSE OF THE EVENT IS UNKNOWN. IF ADDITIONAL INFORMATION IS RECEIVED A SUPPLEMENTAL MEDWATCH REPORT WILL BE SUBMITTED. Manufacturer Narrative: H6-INVESTIGA…	OS	Physician	09/22/2023	2023		Female
https://www.accessdata.fda.gov/scripts/cdrh/cfdocs/cfMAUDE/Detail.CFM?MDRFOI__ID=15890872&pc=MTA	2023826-2022-04363	2019-12-11 05:00:00	Injury	STAAR SURGICAL COMPANY	2022-11-30 05:00:00	MTA	IMPLANTABLE COLLAMER LENS (ICL)	Misfocusing; Inadequacy of Device Shape and/or Size; Adverse Event Without Identified Device or Use Problem	Blurred Vision	P030016	Event Description: THE REPORTER INDICATED THAT THE SURGEON IMPLANTED A 12.6MM VICM5_12.6; -5.0 DIOPTER IMPLANTABLE COLLAMER LENS INTO THE PATIENT'S RIGHT EYE (OD) ON (B)(6) 2019. THE SURGEON REPORTS LOW VAULTING AND REFRACTIVE CHANGE OVER TIME. LENS REMAINS IMPLANTED. THE CAUSE OF THE EVENT WAS REPORTED AS UNKNOWN. Manufacturer Narrative: NO SIMILAR COMPLAINT TYPE EVENTS REPORTED FOR UNITS WITHIN…	OD	Physician	11/23/2022	2022	29	Male
https://www.accessdata.fda.gov/scripts/cdrh/cfdocs/cfMAUDE/Detail.CFM?MDRFOI__ID=8412314&pc=MTA	2023826-2019-00423	2018-08-09 04:00:00	Injury	STAAR SURGICAL COMPANY	2019-03-12 04:00:00	MTA	IMPLANTABLE COLLAMER LENS (ICL)	Misfocusing; Off-Label Use	Blurred Vision	N/A	Event Description: THE REPORTER INDICATED THAT A 12.6MM, VICMO12.6, -01.00 DIOPTER, IMPLANTABLE COLLAMER LENS WAS IMPLANTED INTO THE PATIENTS LEFT EYE (OS) ON (B)(6) 2018. REFRACTIVE SURPRISE WAS OBSERVED, THE LENS WAS REMOVED AND EXCHANGED ON (B)(6) 2019 AND THE PROBLEM WAS RESOLVED. Manufacturer Narrative: DEVICE EVALUATION: THE LENS WAS RETURNED DRY IN A LENS CASE/VIAL. THERE WAS CLEAR SURGICA…	OS		12/07/2018	2018	46
https://www.accessdata.fda.gov/scripts/cdrh/cfdocs/cfMAUDE/Detail.CFM?MDRFOI__ID=8552452&pc=MTA	2023826-2019-00649	2019-03-27 04:00:00	Malfunction	STAAR SURGICAL COMPANY	2019-04-25 04:00:00	MTA	IMPLANTABLE COLLAMER LENS (ICL)	Misfocusing; Off-Label Use	Blurred Vision	P030016	Event Description: THE REPORTER INDICATED THAT THE SURGEON IMPLANTED A 12.6MM MICL12.6 IMPLANTABLE COLLAMER LENS, -10.5 DIOPTER, INTO THE PATIENT'S RIGHT (OD) EYE. THE SURGEON REPORTS REFRACTIVE SURPRISE AND BLURRY VISION. THE LENS REMAINS IMPLANTED AND THE CAUSE OF THE EVENT IS REPORTED AS UNKNOWN. ATTEMPTS TO OBTAIN ADDITIONAL INFORMATION HAVE NOT BEEN SUCCESSFUL. Manufacturer Narrative: CLAIM#…	OD		03/29/2019	2019	52
https://www.accessdata.fda.gov/scripts/cdrh/cfdocs/cfMAUDE/Detail.CFM?MDRFOI__ID=11352467&pc=MTA	2023826-2021-00490	2019-09-02 04:00:00	Injury	STAAR SURGICAL COMPANY	2021-02-19 05:00:00	MTA	IMPLANTABLE COLLAMER LENS (ICL)	Misfocusing; Off-Label Use	Blurred Vision	NA	Event Description: THE REPORTER INDICATED THAT A 12.6MM, VICMO12.6, -3.50 DIOPTER, IMPLANTABLE COLLAMER LENS WAS IMPLANTED INTO THE PATIENTS LEFT EYE (OS) ON (B)(6) 2019. ON (B)(6) 2019 THE LENS WAS EXCHANGED FOR A DIFFERENT DIOPTER LENS DUE TO REFRACTIVE SURPRISE. THIS EXCHANGE RESOLVED THE PROBLEM. CAUSE OF EVENT WAS REPORTED AS UNKNOWN. Manufacturer Narrative: H3 - DEVICE EVALUATION: THE LENS …	OS		01/20/2021	2021	35
https://www.accessdata.fda.gov/scripts/cdrh/cfdocs/cfMAUDE/Detail.CFM?MDRFOI__ID=9412440&pc=MTA	2023826-2019-02275	2019-10-29	Injury	STAAR SURGICAL COMPANY	2019-12-04	MTA	IMPLANTABLE COLLAMER LENS (ICL)	Misfocusing; Off-Label Use	Blurred Vision	NA	Event Description: THE REPORTER INDICATED THAT THE SURGEON IMPLANTED A 12.6MM VICM5_12.6 IMPLANTABLE COLLAMER LENS, DIOPTER -14.0 INTO THE PATIENT'S LEFT EYE (OS) ON (B)(6) 2019. THE SURGEON NOTES LOSS OF BCVA AND REFRACTIVE SURPRISE. REPORTEDLY THE LENS REMAINS IMPLANTED. Manufacturer Narrative: THIS PRODUCT IS MANUFACTURED IN THE U.S. BUT NOT MARKETED IN THE U.S. (B)(4).	OS	Physician	11/07/2019	2019	20
https://www.accessdata.fda.gov/scripts/cdrh/cfdocs/cfMAUDE/Detail.CFM?MDRFOI__ID=9988414&pc=MTA	2023826-2020-00949	2020-04-09	Malfunction	STAAR SURGICAL COMPANY	2020-04-22	MTA	IMPLANTABLE COLLAMER LENS (ICL)	Misfocusing; Off-Label Use	Blurred Vision	NA	Event Description: THE REPORTER INDICATED THE SURGEON IMPLANTED A 12.6MM VICM5_12.6 IMPLANTABLE COLLAMER LENS, -05.50 DIOPTER, IN THE PATIENT'S LEFT EYE (OS) ON (B)(6) 2020. THE LENS WAS IMPLANTED AS AN EXCHANGE LENS. POST-OP, THE NEAR VISION WAS SLIGHTLY IMPROVED BUT STILL NOT IDEAL. THE PATIENT STILL EXPERIENCED A REFRACTIVE SURPRISE AND WILL BE MONITORED. THE LENS REMAINED IMPLANTED. SEE MFR R…	OS	Physician	04/10/2020	2020	50
https://www.accessdata.fda.gov/scripts/cdrh/cfdocs/cfMAUDE/Detail.CFM?MDRFOI__ID=12155602&pc=MTA	2023826-2021-02441	2020-08-26 04:00:00	Injury	STAAR SURGICAL COMPANY	2021-07-12 04:00:00	MTA	IMPLANTABLE COLLAMER LENS	Misfocusing; Off-Label Use	Blurred Vision	NA	Event Description: THE REPORTER INDICATED THAT THE SURGEON IMPLANTED A 12.6MM VICMO12.6 IMPLANTABLE COLLAMER LENS, -9.0 DIOPTER, INTO THE PATIENT'S RIGHT EYE (OD) ON (B)(6) 2020. REPORTEDLY, THE LENS WAS EXCHANGED ON (B)(6) 2020 WITH A SAME SIZE DIFFERENT DIOPTER LENS DUE TO REFRACTIVE SURPRISE. THE PROBLEM WAS RESOLVED. THE CAUSE OF THE EVENT IS REPORTED AS UNKNOWN. Manufacturer Narrative: H3: D…	OD	Physician	06/14/2021	2021	40	Female
https://www.accessdata.fda.gov/scripts/cdrh/cfdocs/cfMAUDE/Detail.CFM?MDRFOI__ID=15288032&pc=MTA	2023826-2022-02900	2020-08-31 04:00:00	Injury	STAAR SURGICAL COMPANY	2022-08-24 04:00:00	MTA	IMPLANTABLE COLLAMER LENS (ICL)	Misfocusing; Off-Label Use	Blurred Vision	P030016	Event Description: THE REPORTER INDICATED THAT A 12.6MM VICMO12.6 IMPLANTABLE COLLAMER LENS OF -4.0 DIOPTER WAS IMPLANTED IN THE PATIENT'S LEFT EYE (OS) ON (B)(6) 2020. ON (B)(6) 2020, THE LENS WAS EXCHANGED FOR A SAME MODEL, SAME SIZE LENS DUE TO REFRACTIVE SURPRISE. THE PROBLEM WAS RESOLVED. CAUSE OF THE EVENT IS UNKNOWN. Manufacturer Narrative: WORK ORDER SEARCH: NO SIMILAR COMPLAINTS WITHIN A…	OS	Physician	07/28/2022	2022	24	Female
https://www.accessdata.fda.gov/scripts/cdrh/cfdocs/cfMAUDE/Detail.CFM?MDRFOI__ID=11453120&pc=MTA	2023826-2021-00602	2020-11-05 05:00:00	Injury	STAAR SURGICAL COMPANY	2021-03-10 05:00:00	MTA	IMPLANTABLE COLLAMER LENS (ICL)	Misfocusing; Off-Label Use	Blurred Vision	N/A	Event Description: THE REPORTER INDICATED THAT A 12.6MM, VICMO 12.6, -10.00 DIOPTER, IMPLANTABLE COLLAMER LENS WAS IMPLANTED INTO THE PATIENT'S RIGHT EYE (OD) ON (B)(6) 2020. ON (B)(6) 2020 THE LENS WAS EXCHANGED WITH A SAME LENGTH TORIC LENS (-10.50/1.0/171 (SPHERE/CYLINDER/AXIS)) DUE TO REFRACTIVE SURPRISE. THIS RESOLVED THE PROBLEM. Manufacturer Narrative: ADDITIONAL INFORMATION: H3 - DEVICE E…	OD		02/19/2021	2021	24
https://www.accessdata.fda.gov/scripts/cdrh/cfdocs/cfMAUDE/Detail.CFM?MDRFOI__ID=11697121&pc=MTA	2023826-2021-01090	2020-11-05 05:00:00	Injury	STAAR SURGICAL COMPANY	2021-04-20 04:00:00	MTA	IMPLANTABLE COLLAMER LENS	Misfocusing; Off-Label Use	Blurred Vision	NA	Event Description: THE REPORTER INDICATED THAT THE SURGEON IMPLANTED A 12.6MM VICMO12.6 IMPLANTABLE COLLAMER LENS, -9.5 DIOPTER, INTO THE PATIENT'S LEFT EYE (OS) ON (B)(6) 2020. ON (B)(6) 2020 THE LENS WAS EXCHANGED WITH A SAME SIZE DIFFERENT MODEL LENS DUE TO REFRACTIVE SURPRISE. THE PROBLEM WAS RESOLVED. REPORTEDLY AFTER EXCHANGE THE POSTOP VISUAL ACUITY WAS 1.2 AND NO GHOSTING WAS REPORTED. Ma…	OS		03/25/2021	2021	24
https://www.accessdata.fda.gov/scripts/cdrh/cfdocs/cfMAUDE/Detail.CFM?MDRFOI__ID=11714206&pc=MTA	2023826-2021-01112	2020-12-31 05:00:00	Injury	STAAR SURGICAL COMPANY	2021-04-23 04:00:00	MTA	IMPLANTABLE COLLAMER LENS (ICL)	Misfocusing; Off-Label Use	Blurred Vision	NA	Event Description: THE REPORTER INDICATED THAT A 13.2MM, VICMO13.2, -6.50 DIOPTER, IMPLANTABLE COLLAMER LENS WAS IMPLANTED INTO THE PATIENTS RIGHT EYE (OD) ON (B)(6) 2020. ON (B)(6) 2020 THE LENS WAS EXCHANGED FOR A DIFFERENT DIOPTER LENS DUE TO REFRACTIVE SURPRISE AND BLURRED VISION. THIS EXCHANGE RESOLVED THE PROBLEM. IN THE REPORTERS OPINION THE CAUSE OF THIS EVENT WAS PATIENT RELATED FACTOR. …	OD		03/24/2021	2021	31
https://www.accessdata.fda.gov/scripts/cdrh/cfdocs/cfMAUDE/Detail.CFM?MDRFOI__ID=12222296&pc=MTA	2023826-2021-02819	2021-03-03 05:00:00	Injury	STAAR SURGICAL COMPANY	2021-07-23 04:00:00	MTA	IMPLANTABLE COLLAMER LENS	Misfocusing; Off-Label Use	Blurred Vision	NA	Event Description: THE REPORTER INDICATED THAT THE SURGEON IMPLANTED A 12.6MM VICMO12.6 IMPLANTABLE COLLAMER LENS, -1.75 DIOPTER INTO THE PATIENT'S RIGHT EYE (OD) ON (B)(6) 2020. REPORTEDLY, THE LENS WAS EXCHANGED ON (B)(6) 2021 WITH A SAME SIZE DIFFERENT DIOPTER LENS DUE TO REFRACTIVE SURPRISE. THE PROBLEM WAS RESOLVED. THE CAUSE OF THE EVENT IS REPORTED AS UNKNOWN. Manufacturer Narrative: ADDIT…	OD	Physician	06/29/2021	2021	32	Male
https://www.accessdata.fda.gov/scripts/cdrh/cfdocs/cfMAUDE/Detail.CFM?MDRFOI__ID=12378560&pc=MTA	2023826-2021-03376	2021-03-28 04:00:00	Injury	STAAR SURGICAL COMPANY	2021-08-27 04:00:00	MTA	IMPLANTABLE COLLAMER LENS	Misfocusing; Off-Label Use	Blurred Vision	NA	Event Description: THE REPORTER INDICATED THAT THE SURGEON IMPLANTED A 12.1MM VICMO12.1 IMPLANTABLE COLLAMER LENS, -3.0 DIOPTER INTO THE PATIENT'S RIGHT EYE (OD) ON (B)(6) 2021. REPORTEDLY, THE LENS WAS EXCHANGED ON (B)(6) 2021 WITH A SAME SIZE DIFFERENT DIOPTER LENS DUE TO REFRACTIVE SURPRISE. THE PROBLEM WAS RESOLVED. THE CAUSE OF THE EVENT IS REPORTED AS UNKNOWN. Manufacturer Narrative: H3 - D…	OD	Physician	08/05/2021	2021	26	Female
https://www.accessdata.fda.gov/scripts/cdrh/cfdocs/cfMAUDE/Detail.CFM?MDRFOI__ID=12072264&pc=MTA	2023826-2021-02071	2021-04-22 04:00:00	Injury	STAAR SURGICAL COMPANY	2021-06-25 04:00:00	MTA	IMPLANTABLE COLLAMER LENS	Misfocusing; Off-Label Use	Blurred Vision	NA	Event Description: THE REPORTER INDICATED THAT THE SURGEON IMPLANTED A 12.6MM VICMO12.6 IMPLANTABLE COLLAMER LENS, -13.0 DIOPTER, INTO THE PATIENT'S RIGHT EYE (OD) ON (B)(6) 2021. REPORTEDLY, THE LENS WAS EXCHANGED ON (B)(6) 2021 WITH A SAME SIZE DIFFERENT DIOPTER LENS DUE TO REFRACTIVE SURPRISE. THE PROBLEM WAS RESOLVED. THE CAUSE OF THE EVENT IS REPORTED AS UNKNOWN. THE SURGEON REPORTS, "THE PA…	OD	Physician	05/30/2021	2021	44	Female
https://www.accessdata.fda.gov/scripts/cdrh/cfdocs/cfMAUDE/Detail.CFM?MDRFOI__ID=12599748&pc=MTA	2023826-2021-03907	2021-04-22 04:00:00	Injury	STAAR SURGICAL COMPANY	2021-10-08 04:00:00	MTA	IMPLANTABLE COLLAMER LENS	Misfocusing; Off-Label Use	Blurred Vision	NA	Event Description: THE REPORTER INDICATED THAT THE SURGEON IMPLANTED A 12.6MM VICMO12.6 IMPLANTABLE COLLAMER LENS, -15.0 DIOPTER INTO THE PATIENT'S RIGHT EYE (OD) ON (B)(6) 2021. REPORTEDLY, THE LENS WAS EXCHANGED ON (B)(6) 2021 WITH A SAME SIZE DIFFERENT MODEL LENS DUE TO REFRACTIVE SURPRISE. THE PROBLEM WAS RESOLVED. THE CAUSE OF THE EVENT IS REPORTED AS UNKNOWN. Manufacturer Narrative: H3: DEV…	OD	Physician	09/13/2021	2021	37	Female
https://www.accessdata.fda.gov/scripts/cdrh/cfdocs/cfMAUDE/Detail.CFM?MDRFOI__ID=12599734&pc=MTA	2023826-2021-03917	2021-05-11 04:00:00	Injury	STAAR SURGICAL COMPANY	2021-10-08 04:00:00	MTA	IMPLANTABLE COLLAMER LENS	Misfocusing; Off-Label Use	Blurred Vision	NA	Event Description: THE REPORTER INDICATED THAT THE SURGEON IMPLANTED A 12.6MM VICMO12.6 IMPLANTABLE COLLAMER LENS, -16.0 DIOPTER INTO THE PATIENT'S RIGHT EYE (OD) ON (B)(6) 2021. REPORTEDLY, THE LENS WAS EXCHANGED ON (B)(6) 2021 WITH A SAME SIZE DIFFERENT MODEL LENS DUE TO REFRACTIVE SURPRISE. THE PROBLEM WAS RESOLVED. THE CAUSE OF THE EVENT IS REPORTED AS UNKNOWN. Manufacturer Narrative: H3: DEV…	OD	Physician	09/16/2021	2021	50	Female
https://www.accessdata.fda.gov/scripts/cdrh/cfdocs/cfMAUDE/Detail.CFM?MDRFOI__ID=12363349&pc=MTA	2023826-2021-03286	2021-06-16 04:00:00	Injury	STAAR SURGICAL COMPANY	2021-08-24 04:00:00	MTA	IMPLANTABLE COLLAMER LENS	Misfocusing; Off-Label Use	Blurred Vision	NA	Event Description: THE REPORTER INDICATED THAT THE SURGEON IMPLANTED A 12.6MM VICMO12.6 IMPLANTABLE COLLAMER LENS, -9.5 DIOPTER, INTO THE PATIENT'S LEFT EYE (OS) ON (B)(6) 2021. ON (B)(6) 2021 THE LENS WAS EXCHANGED WITH A SAME SIZE DIFFERENT MODEL LENS DUE TO REFRACTIVE SURPRISE. THE PROBLEM WAS RESOLVED. THE CAUSE OF THE EVENT IS REPORTED AS UNKNOWN. Manufacturer Narrative: ADDITIONAL INFORMATI…	OS	Physician	07/27/2021	2021	28	Female
[truncated: 10,410 more rows]
