# Supplementary material for: Adverse events associated with Implantable Collamer Lens: insights from the FDA MAUDE database
Source: Front Med (Lausanne). 2025 Jul 21;12:1613060. doi: 10.3389/fmed.2025.1613060 (PMC12319018; doi:10.3389/fmed.2025.1613060)
Supplement: Supplementary file 9 [file Table_8.XLSX]

## Sheet: Sheet1
Web Address	Report Number	Event Date	Event Type	Manufacturer	Date Received	Product Code	Brand Name	Device Problem	Patient Problem	PMA/PMN Number	Event Text	Lens Diopter	Surgical Eye Laterality	Reporter Occupation	reportDate	Year	Patient Age	patientSex
https://www.accessdata.fda.gov/scripts/cdrh/cfdocs/cfMAUDE/Detail.CFM?MDRFOI__ID=13765546&pc=QCB	2023826-2022-00804	2021-10-16 04:00:00	Malfunction	STAAR SURGICAL COMPANY	2022-03-15 04:00:00	QCB	IMPLANTABLE COLLAMER LENS (ICL)	No Apparent Adverse Event			Event Description: THE REPORTER INDICATED THAT THE SURGEON IMPLANTED A 12.6MM VTICMO12.6; -15.0/2.5/093 (SPHERE/CYLINDER/AXIS) IMPLANTABLE COLLAMER LENS INTO THE PATIENT'S LEFT EYE (OS) ON (B)(6) 2021. THE LENS HAD TORE DURING INJECTION/DELIVERY INTO THE EYE. THERE WAS NO PATIENT INJURY. INTRAOPERATIVELY A REPLACEMENT LENS OF LONGER LENGTH WAS IMPLANTED AND THIS RESOLVED THE PROBLEM. THE CAUSE OF…	-15.0/2.5/093	OS	Physician	03/14/2022	2022
https://www.accessdata.fda.gov/scripts/cdrh/cfdocs/cfMAUDE/Detail.CFM?MDRFOI__ID=10524336&pc=QCB	2023826-2020-02038	2020-08-04	Malfunction	STAAR SURGICAL COMPANY	2020-09-11	QCB	IMPLANTABLE COLLAMER LENS (ICL)	Off-Label Use; Inadequacy of Device Shape and/or Size	Appropriate Clinical Signs, Symptoms, Conditions Term / Code Not Available	N/A#S-P#N/A	Event Description: THE REPORTER INDICATED THAT A 12.6MM, VTICM5_12.6, -10.00/1.50/076 (SPHERE/CYLINDER/AXIS), IMPLANTABLE COLLAMER LENS WAS IMPLANTED INTO THE PATIENTS LEFT EYE (OS) ON (B)(6) 2020. LOW VAULT WITH 'CENTRAL TOUCH TO THE CRYSTALLINE LENS ANTERIOR CAPSULE' WERE REPORTED. THE LENS REMAINS IMPLANTED WITH PLANNED EXCHANGE FOR A LONGER SIZE LENS. Manufacturer Narrative: THIS PRODUCT IS N…	-10.00/1.50/076	OS	Physician	08/13/2020	2020	30
https://www.accessdata.fda.gov/scripts/cdrh/cfdocs/cfMAUDE/Detail.CFM?MDRFOI__ID=10524379&pc=QCB	2023826-2020-02037	2019-12-14	Malfunction	STAAR SURGICAL COMPANY	2020-09-11	QCB	IMPLANTABLE COLLAMER LENS (ICL)	Off-Label Use; Inadequacy of Device Shape and/or Size	Appropriate Clinical Signs, Symptoms, Conditions Term / Code Not Available	N/A#S-P#N/A	Event Description: THE REPORTER INDICATED THAT A 12.6MM, VTICM5_12.6, -12.50/2.50/146 (SPHERE/CYLINDER/AXIS), IMPLANTABLE COLLAMER LENS WAS IMPLANTED INTO THE PATIENT'S RIGHT EYE (OD) ON (B)(6) 2019. LOW VAULT WITH 'CENTRAL TOUCH TO CRYSTALLINE LENS ANTERIOR CAPSULE' WERE REPORTED. THE LENS REMAINS IMPLANTED WITH A PLANNED EXCHANGE FOR A LONGER LENS. Manufacturer Narrative: THIS PRODUCT IS NOT MA…	-12.50/2.50/146	OD	Physician	08/13/2020	2020	29
https://www.accessdata.fda.gov/scripts/cdrh/cfdocs/cfMAUDE/Detail.CFM?MDRFOI__ID=10532967&pc=QCB	2023826-2020-02043	2020-05-31	Injury	STAAR SURGICAL COMPANY	2020-09-14	QCB	IMPLANTABLE COLLAMER LENS (ICL)	Off-Label Use; Inadequacy of Device Shape and/or Size	Appropriate Clinical Signs, Symptoms, Conditions Term / Code Not Available	NA	Event Description: THE REPORTER INDICATED THAT THE SURGEON IMPLANTED A 13.2MM VTICMO13.2 IMPLANTABLE COLLAMER LENS, -10.0/1.5/080 (SPHERE/CYLINDER/AXIS), INTO THE PATIENT'S LEFT EYE (OS) ON (B)(6)2020. ON (B)(6) 2020 THE LENS WAS EXPLANTED DUE TO EXCESSIVE VAULT WITH SIGNIFICANT REDUCTION OF IRIDOCORNEAL ANGLES. THE LENS WAS LATER REPLACED FOR A SHORTER LENGTH LENS ON (B)(6) 2020 AND THE PROBLEM …	-10.0/1.5/080	OS	Physician	08/16/2020	2020	20
https://www.accessdata.fda.gov/scripts/cdrh/cfdocs/cfMAUDE/Detail.CFM?MDRFOI__ID=10529725&pc=QCB	2023826-2020-02073	2020-08-18 04:00:00	Injury	STAAR SURGICAL COMPANY	2020-09-14 04:00:00	QCB	IMPLANTABLE COLLAMER LENS (ICL)	Inadequacy of Device Shape and/or Size; Device Dislodged or Dislocated	Appropriate Clinical Signs, Symptoms, Conditions Term / Code Not Available	NA#S-P#NA	Event Description: THE REPORTER INDICATED THE SURGEON IMPLANTED A 12.1MM VTICMO12.1 IMPLANTABLE COLLAMER LENS, -16.00/+3.0/089 (SPHERE/CYLINDER/AXIS), IN THE PATIENTS LEFT EYE (OS) ON (B)(6) 2020. THE LENS WAS REPORTED AS LOW VAULTING WITH LENS ROTATION, AND NARROW ANGLE. THE LENS REMAINS IMPLANTED. THE CAUSE OF THE EVENT WAS DUE TO ANOMALY IN THE SULCUS STRUCTURE, SO THE LENS WOULD NOT STABILIZE…	-16.00/+3.0/089	OS		08/18/2020	2020	33
https://www.accessdata.fda.gov/scripts/cdrh/cfdocs/cfMAUDE/Detail.CFM?MDRFOI__ID=10548153&pc=QCB	2023826-2020-02099	2020-05-21 04:00:00	Injury	STAAR SURGICAL COMPANY	2020-09-17 04:00:00	QCB	IMPLANTABLE COLLAMER LENS (ICL)	Misfocusing; Inadequacy of Device Shape and/or Size	Appropriate Clinical Signs, Symptoms, Conditions Term / Code Not Available	N/A#S-P#N/A	Event Description: THE REPORTER INDICATED THAT A 12.6MM, VTICMO12.6, -14.50/3.0/095 (SPHERE/CYLINDER/AXIS), IMPLANTABLE COLLAMER LENS WAS IMPLANTED INTO THE PATIENT'S RIGHT EYE (OD) ON (B)(6) 2020. SIGNIFICANT REDUCTION OF IRIDO-CORNEAL ANGELS, REFRACTIVE SURPRISE, AND EXCESSIVE VAULT WERE OBSERVED, THE LENS WAS REMOVED AND EXCHANGED FOR A SHORTER LENGTH LENS ON (B)(6) 2020 AND THE PROBLEM WAS RE…	-14.50/3.0/095	OD		08/26/2020	2020	32
https://www.accessdata.fda.gov/scripts/cdrh/cfdocs/cfMAUDE/Detail.CFM?MDRFOI__ID=10639547&pc=QCB	2023826-2020-02308	2020-02-20 05:00:00	Injury	STAAR SURGICAL COMPANY	2020-10-06 04:00:00	QCB	IMPLANTABLE COLLAMER LENS (ICL)	Inadequacy of Device Shape and/or Size; Patient-Device Incompatibility	Appropriate Clinical Signs, Symptoms, Conditions Term / Code Not Available	NA	Event Description: THE REPORTER INDICATED THAT A 13.7MM, VTICM5_13.7, -14/6/88 (SPHERE/CYLINDER/AXIS), IMPLANTABLE COLLAMER LENS WAS IMPLANTED INTO THE PATIENTS LEFT EYE (OS) ON (B)(6) 2020. ON (B)(6) 2020 THE LENS WAS EXCHANGED FOR A SHORTER LENGTH LENS DUE TO EXCESSIVE VAULT AND SIGNIFICANT REDUCTION OF IRIDO-CORNEAL ANGLES. THIS EXCHANGE RESOLVED THE PROBLEM. IN THE REPORTERS OPINION THE CAUSE…	-14/6/88	OS		09/10/2020	2020	45
https://www.accessdata.fda.gov/scripts/cdrh/cfdocs/cfMAUDE/Detail.CFM?MDRFOI__ID=10706892&pc=QCB	2023826-2020-02408	2020-08-29	Malfunction	STAAR SURGICAL COMPANY	2020-10-20	QCB	IMPLANTABLE COLLAMER LENS (ICL)	Misfocusing; Inadequacy of Device Shape and/or Size; Device Dislodged or Dislocated	Appropriate Clinical Signs, Symptoms, Conditions Term / Code Not Available	NA#S-P#NA	Event Description: THE REPORTER INDICATED THE SURGEON IMPLANTED A 13.2MM VTICM5_13.2 IMPLANTABLE COLLAMER LENS, -03.50/+6.0/009 (SPHERE/CYLINDER/AXIS), IN THE PATIENTS LEFT EYE (OS), ON (B)(6) 2020. THE LENS WAS REPORTED AS HAVING EXCESSIVE VAULTING, LENS ROTATION, REDUCED ANTERIOR CHAMBER ANGLES AND PATIENT EXPERIENCED A REFRACTIVE SURPRISE. THE LENS REMAINED IMPLANTED. Manufacturer Narrative: T…	-03.50/+6.0/009	OS	Physician	09/22/2020	2020	31
https://www.accessdata.fda.gov/scripts/cdrh/cfdocs/cfMAUDE/Detail.CFM?MDRFOI__ID=10708893&pc=QCB	2023826-2020-02440	2020-06-17 04:00:00	Injury	STAAR SURGICAL COMPANY	2020-10-20 04:00:00	QCB	IMPLANTABLE COLLAMER LENS (ICL)	Off-Label Use; Inadequacy of Device Shape and/or Size	Appropriate Clinical Signs, Symptoms, Conditions Term / Code Not Available	NA	Event Description: THE REPORTER INDICATED THAT THE SURGEON IMPLANTED A 13.2MM VTICMO13.2 IMPLANTABLE COLLAMER LENS, -5.5/+2.0/088 (SPHERE/CYLINDER/AXIS), INTO THE PATIENT'S LEFT EYE (OS) ON (B)(6) 2020. ON (B)(6) 2020 THE LENS WAS EXCHANGED WITH A SHORTER LENGTH LENS DUE TO EXCESSIVE VAULT AND SIGNIFICANT REDUCTION OF IRIDO-CORNEAL ANGLES (ICA). THE PROBLEM WAS RESOLVED. THE CAUSE OF THE EVENT IS…	-5.5/+2.0/088	OS		09/25/2020	2020	20
https://www.accessdata.fda.gov/scripts/cdrh/cfdocs/cfMAUDE/Detail.CFM?MDRFOI__ID=10708902&pc=QCB	2023826-2020-02439	2020-06-17 04:00:00	Injury	STAAR SURGICAL COMPANY	2020-10-20 04:00:00	QCB	IMPLANTABLE COLLAMER LENS (ICL)	Off-Label Use; Inadequacy of Device Shape and/or Size	Appropriate Clinical Signs, Symptoms, Conditions Term / Code Not Available	NA	Event Description: THE REPORTER INDICATED THAT THE SURGEON IMPLANTED A 13.2MM VTICMO13.2 IMPLANTABLE COLLAMER LENS, -5.5/+2.0/098 (SPHERE/CYLINDER/AXIS), INTO THE PATIENT'S RIGHT EYE (OD) ON (B)(6) 2020. ON (B)(6) 2020 THE LENS WAS EXCHANGED WITH A SHORTER LENGTH LENS DUE TO EXCESSIVE VAULT AND SIGNIFICANT REDUCTION OF IRIDO-CORNEAL ANGLES (ICA). THE PROBLEM WAS RESOLVED. THE CAUSE OF THE EVENT I…	-5.5/+2.0/098	OD		09/25/2020	2020	20
https://www.accessdata.fda.gov/scripts/cdrh/cfdocs/cfMAUDE/Detail.CFM?MDRFOI__ID=11091992&pc=QCB	2023826-2020-03222	2020-11-20 05:00:00	Injury	STAAR SURGICAL COMPANY	2020-12-29 05:00:00	QCB	IMPLANTABLE COLLAMER LENS (ICL)	Misfocusing; Inadequacy of Device Shape and/or Size; Device Dislodged or Dislocated	Appropriate Clinical Signs, Symptoms, Conditions Term / Code Not Available	NA#S-P#NA	Event Description: THE REPORTER INDICATED THE SURGEON IMPLANTED A 13.2MM VTICM5_13.2 IMPLANTABLE COLLAMER LENS, -14.00/+1.5/092 (SPHERE/CYLINDER/AXIS) IN THE PATIENTS RIGHT EYE (OD) ON (B)(6) 2020. THE LENS WAS EXPLANTED ON (B)(6) 2020 DUE TO EXCESSIVE VAULTING (THE LENS VAULTED FORWARD), ANGLE CLOSURE AND LENS ROTATION. THE PATIENT EXPERIENCED A REFRACTIVE SURPRISE. THE LENS WAS EXCHANGED FOR A …	-14/1.5/92	OD		12/02/2020	2020	22
https://www.accessdata.fda.gov/scripts/cdrh/cfdocs/cfMAUDE/Detail.CFM?MDRFOI__ID=11043450&pc=QCB	2023826-2020-03083	2020-11-06 05:00:00	Injury	STAAR SURGICAL COMPANY	2020-12-20 05:00:00	QCB	IMPLANTABLE COLLAMER LENS (ICL)	Inadequacy of Device Shape and/or Size	Appropriate Clinical Signs, Symptoms, Conditions Term / Code Not Available	NA	Event Description: THE REPORTER INDICATED THAT A 13.2MM, VTICM5_13.2,-4.5/+1.0/26 (SPHERE/CYLINDER/AXIS), IMPLANTABLE COLLAMER LENS WAS IMPLANTED INTO THE PATIENTS LEFT EYE (OS) ON (B)(6) 2020. EXCESSIVE VAULT AND SIGNIFICANT REDUCTION OF IRIDO-CORNEAL ANGLES WAS OBSERVED, LENS REMAINS IMPLANTED. IN THE REPORTERS OPINION THE CAUSE OF THIS EVENT IS PATIENT-RELATED FACTOR. ADDITIONAL INFORMATION HA…	-4.5/+1.0/26	OS		11/21/2020	2020	39
https://www.accessdata.fda.gov/scripts/cdrh/cfdocs/cfMAUDE/Detail.CFM?MDRFOI__ID=10980473&pc=QCB	2023826-2020-02942	2020-10-02 04:00:00	Injury	STAAR SURGICAL COMPANY	2020-12-09 05:00:00	QCB	IMPLANTABLE COLLAMER LENS (ICL)	Inadequacy of Device Shape and/or Size	Appropriate Clinical Signs, Symptoms, Conditions Term / Code Not Available	NA	Event Description: THE REPORTER INDICATED THAT THE SURGEON IMPLANTED A 13.2MM VTICMO13.2 IMPLANTABLE COLLAMER LENS, -8.5/+2.0/091 (SPHERE/CYLINDER/AXIS), INTO THE PATIENT'S LEFT EYE (OS) ON (B)(6) 2020. ON (B)(6) 2020 THE LENS WAS EXCHANGED WITH A SHORTER LENGTH LENS DUE TO EXCESSIVE VAULT AND SIGNIFICANT REDUCTION OF IRIDO-CORNEAL ANGLES (ICA). THE PROBLEM WAS RESOLVED. THE CAUSE OF THE EVENT IS…	-8.5/+2.0/091	OS		11/17/2020	2020	35
https://www.accessdata.fda.gov/scripts/cdrh/cfdocs/cfMAUDE/Detail.CFM?MDRFOI__ID=10980526&pc=QCB	2023826-2020-02941	2020-10-02 04:00:00	Injury	STAAR SURGICAL COMPANY	2020-12-09 05:00:00	QCB	IMPLANTABLE COLLAMER LENS (ICL)	Inadequacy of Device Shape and/or Size	Appropriate Clinical Signs, Symptoms, Conditions Term / Code Not Available	NA	Event Description: THE REPORTER INDICATED THAT THE SURGEON IMPLANTED A 13.2MM VTICMO13.2 IMPLANTABLE COLLAMER LENS, -9.0/+2.0/090 (SPHERE/CYLINDER/AXIS), INTO THE PATIENT'S RIGHT EYE (OD) ON (B)(6) 2020. ON (B)(6) 2020 THE LENS WAS EXCHANGED WITH A SHORTER LENGTH LENS DUE TO EXCESSIVE VAULT AND SIGNIFICANT REDUCTION OF IRIDO-CORNEAL ANGLES (ICA). THE PROBLEM WAS RESOLVED. THE CAUSE OF THE EVENT I…	-9.0/+2.0/090	OD		11/17/2020	2020	35
https://www.accessdata.fda.gov/scripts/cdrh/cfdocs/cfMAUDE/Detail.CFM?MDRFOI__ID=10970021&pc=QCB	2023826-2020-02891	2020-08-10 04:00:00	Injury	STAAR SURGICAL COMPANY	2020-12-08 05:00:00	QCB	IMPLANTABLE COLLAMER LENS (ICL)	Inadequacy of Device Shape and/or Size	Appropriate Clinical Signs, Symptoms, Conditions Term / Code Not Available	N/A	Event Description: THE REPORTER INDICATED THE SURGEON IMPLANTED A 13.2MM VTICMO13.2 IMPLANTABLE COLLAMER LENS, -12.50/+1.0/082 (SPHERE/CYLINDER/AXIS), IN THE PATIENTS RIGHT EYE (OD), ON (B)(6) 2020. THE LENS WAS EXPLANTED ON (B)(6) 2020 DUE TO EXCESSIVE VAULTING AND SIGNIFICANT REDUCTION OF IRIDO-CORNEAL ANGLES. THE LENS WAS EXCHANGED FOR A SHORTER LENS AND THE PROBLEM WAS RESOLVED. THE CAUSE OF …	-12.50/+1.0/082	OD		11/11/2020	2020	29
https://www.accessdata.fda.gov/scripts/cdrh/cfdocs/cfMAUDE/Detail.CFM?MDRFOI__ID=10852580&pc=QCB	2023826-2020-02683	2020-06-02 04:00:00	Injury	STAAR SURGICAL COMPANY	2020-11-17 05:00:00	QCB	IMPLANTABLE COLLAMER LENS (ICL)	Inadequacy of Device Shape and/or Size	Appropriate Clinical Signs, Symptoms, Conditions Term / Code Not Available	NA#S-P#NA	Event Description: THE REPORTER INDICATED THE SURGEON IMPLANTED A 13.2MM VTICMO13.2 IMPLANTABLE COLLAMER LENS, -15.00/+3.5/094 (SPHERE/CYLINDER/AXIS), IN THE PATIENTS RIGHT EYE (OD), ON (B)(6) 2020. THE LENS WAS EXPLANTED ON (B)(6) 2020 DUE TO EXCESSIVE VAULTING, AND SIGNIFICANT REDUCTION OF IRIDO-CORNEAL ANGLES. THE LENS WAS EXCHANGED FOR A SHORTER LENS, AND THE PROBLEM WAS RESOLVED. THE CAUSE O…	-15.00/+3.5/094	OD		10/21/2020	2020	27
https://www.accessdata.fda.gov/scripts/cdrh/cfdocs/cfMAUDE/Detail.CFM?MDRFOI__ID=10852617&pc=QCB	2023826-2020-02684	2020-06-02 04:00:00	Injury	STAAR SURGICAL COMPANY	2020-11-17 05:00:00	QCB	IMPLANTABLE COLLAMER LENS (ICL)	Inadequacy of Device Shape and/or Size	Appropriate Clinical Signs, Symptoms, Conditions Term / Code Not Available	NA#S-P#NA	Event Description: THE REPORTER INDICATED THE SURGEON IMPLANTED A 13.2MM VTICMO13.2 IMPLANTABLE COLLAMER LENS, -15.00/+3.5/088 (SPHERE/CYLINDER/AXIS), IN THE PATIENTS LEFT EYE (OS), ON (B)(6) 2020. THE LENS WAS EXPLANTED ON (B)(6) 2020 DUE TO EXCESSIVE VAULTING AND SIGNIFICANT REDUCTION OF IRIDO-CORNEAL ANGLES. THE LENS WAS EXCHANGED FOR A SHORTER LENS AND THE PROBLEM WAS RESOLVED. THE EYE WAS ST…	-15.00/+3.5/088	OS		10/21/2020	2020	27
https://www.accessdata.fda.gov/scripts/cdrh/cfdocs/cfMAUDE/Detail.CFM?MDRFOI__ID=10824328&pc=QCB	2023826-2020-02648	2020-06-14 04:00:00	Injury	STAAR SURGICAL COMPANY	2020-11-11 05:00:00	QCB	IMPLANTABLE COLLAMER LENS (ICL)	Inadequacy of Device Shape and/or Size	Appropriate Clinical Signs, Symptoms, Conditions Term / Code Not Available	NA	Event Description: THE REPORTER INDICATED THAT A 13.2MM, VTICMO13.2, -12.0/1.5/090 (SPHERE/CYLINDER/AXIS), IMPLANTABLE COLLAMER LENS WAS IMPLANTED INTO THE PATIENTS LEFT EYE (OS) ON (B)(6) 2020. ON (B)(6) 2020 THE LENS WAS EXCHANGED FOR A SHORTER LENGTH LENS DUE TO EXCESSIVE VAULT AND SIGNIFICANT REDUCTION OF IRIDO-CORNEAL ANGLES. THIS EXCHANGE RESOLVED THE PROBLEM. Manufacturer Narrative: ADDITI…	-12.0/1.5/090	OS		10/15/2020	2020	20
https://www.accessdata.fda.gov/scripts/cdrh/cfdocs/cfMAUDE/Detail.CFM?MDRFOI__ID=11116953&pc=QCB	2023826-2021-00030	2020-09-17	Injury	STAAR SURGICAL COMPANY	2021-01-05	QCB	IMPLANTABLE COLLAMER LENS (ICL)	Inadequacy of Device Shape and/or Size	Appropriate Clinical Signs, Symptoms, Conditions Term / Code Not Available	N/A	Event Description: THE REPORTER INDICATED THAT A 13.2MM, VTICMO13.2, -14.00/1.0/086 (SPHERE/CYLINDER/AXIS), IMPLANTABLE COLLAMER LENS WAS IMPLANTED INTO THE PATIENT'S LEFT EYE (OS) ON (B)(6) 2020. SIGNIFICANT REDUCTION OF IRIDO-CORNEAL ANGELS AND EXCESSIVE VAULT WERE OBSERVED. THE LENS WAS REMOVED AND EXCHANGED FOR A SHORTER LENGTH LENS ON (B)(6) 2020 AND THE PROBLEM WAS RESOLVED. CAUSE OF THE EV…	-14.00/1.0/086	OS	Physician	12/14/2020	2020	26
https://www.accessdata.fda.gov/scripts/cdrh/cfdocs/cfMAUDE/Detail.CFM?MDRFOI__ID=11116959&pc=QCB	2023826-2021-00031	2020-09-10	Injury	STAAR SURGICAL COMPANY	2021-01-05	QCB	IMPLANTABLE COLLAMER LENS (ICL)	Inadequacy of Device Shape and/or Size; Improper or Incorrect Procedure or Method	Appropriate Clinical Signs, Symptoms, Conditions Term / Code Not Available	N/A	Event Description: THE REPORTER INDICATED THAT A 13.2MM, VTICM513.2, -14.00/4.0/070 (SPHERE/CYLINDER/AXIS), IMPLANTABLE COLLAMER LENS WAS IMPLANTED INTO THE PATIENT'S RIGHT EYE (OD) ON (B)(6) 2020. SIGNIFICANT REDUCTION OF IRIDO-CORNEAL ANGELS AND EXCESSIVE VAULT WERE OBSERVED, THE LENS WAS REMOVED AND EXCHANGED FOR A SHORTER LENGTH LENS ON (B)(6) 2020 AND THE PROBLEM WAS RESOLVED. CAUSE OF THE E…	-14.00/4.0/070	OD	Physician	12/14/2020	2020	26
https://www.accessdata.fda.gov/scripts/cdrh/cfdocs/cfMAUDE/Detail.CFM?MDRFOI__ID=11129384&pc=QCB	2023826-2021-00082	2020-09-27 04:00:00	Injury	STAAR SURGICAL COMPANY	2021-01-07 05:00:00	QCB	IMPLANTABLE COLLAMER LENS (ICL)	Inadequacy of Device Shape and/or Size	Appropriate Clinical Signs, Symptoms, Conditions Term / Code Not Available	N/A	Event Description: THE REPORTER INDICATED THAT A 13.7MM, VTICMO13.7, -11.50/1.0/080(SPHERE/CYLINDER/AXIS), IMPLANTABLE COLLAMER LENS WAS IMPLANTED INTO THE PATIENTS RIGHT EYE (OD) ON (B)(6) 2020. ON (B)(6) 2020 THE LENS WAS EXCHANGED FOR A SHORTER LENGTH LENS DUE TO EXCESSIVE VAULT AND SIGNIFICANT REDUCTION OF IRIDO-CORNEAL ANGLES. THIS EXCHANGE RESOLVED THE PROBLEM. Manufacturer Narrative: ADDIT…	-11.50/1.0/080	OD		12/11/2020	2020
https://www.accessdata.fda.gov/scripts/cdrh/cfdocs/cfMAUDE/Detail.CFM?MDRFOI__ID=11168676&pc=QCB	2023826-2021-00138	2020-10-19	Injury	STAAR SURGICAL COMPANY	2021-01-14	QCB	IMPLANTABLE COLLAMER LENS (ICL)	Inadequacy of Device Shape and/or Size	Appropriate Clinical Signs, Symptoms, Conditions Term / Code Not Available	NA	Event Description: THE REPORTER INDICATED THAT A 13.2MM, VTICMO13.2, -3.5/3.5/178 (SPHERE/CYLINDER/AXIS), IMPLANTABLE COLLAMER LENS WAS IMPLANTED INTO THE PATIENTS LEFT EYE (OS) ON (B)(6) 2020. ON (B)(6) 2020 THE LENS WAS EXCHANGED FOR A SHORTER LENGTH LENS DUE TO EXCESSIVE VAULT AND SIGNIFICANT REDUCTION OF IRIDO-CORNEAL ANGLES. THIS EXCHANGE RESOLVED THE PROBLEM. Manufacturer Narrative: THIS PR…	-3.5/3.5/178	OS	Physician	12/18/2020	2020	26
https://www.accessdata.fda.gov/scripts/cdrh/cfdocs/cfMAUDE/Detail.CFM?MDRFOI__ID=11189749&pc=QCB	2023826-2021-00148	2020-11-16	Injury	STAAR SURGICAL COMPANY	2021-01-18	QCB	IMPLANTABLE COLLAMER LENS (ICL)	Inadequacy of Device Shape and/or Size	Appropriate Clinical Signs, Symptoms, Conditions Term / Code Not Available	NA#S-P#NA	Event Description: THE REPORTER INDICATED THE SURGEON IMPLANTED A 13.7MM VTICMO13.7 IMPLANTABLE COLLAMER LENS, -14.50/+4.0/087 (SPHERE/CYLINDER/AXIS) IN THE PATIENTS LEFT EYE (OS), ON (B)(6) 2020. THE LENS WAS EXPLANTED ON (B)(6) 2020 DUE TO EXCESSIVE VAULTING AND SIGNIFICANT REDUCTION OF IRIDO-CORNEAL ANGLES. THE LENS WAS EXCHANGED FOR A SHORTER LENS AND THE PROBLEM WAS RESOLVED. THE CAUSE OF TH…	-14.50/+4.0/087	OS	Physician	12/31/2020	2020	27
https://www.accessdata.fda.gov/scripts/cdrh/cfdocs/cfMAUDE/Detail.CFM?MDRFOI__ID=11189756&pc=QCB	2023826-2021-00145	2020-11-02	Injury	STAAR SURGICAL COMPANY	2021-01-18	QCB	IMPLANTABLE COLLAMER LENS (ICL)	Inadequacy of Device Shape and/or Size	Appropriate Clinical Signs, Symptoms, Conditions Term / Code Not Available	NA#S-P#NA	Event Description: THE REPORTER INDICATED THE SURGEON IMPLANTED A 13.7MM VTICM5_13.7 IMPLANTABLE COLLAMER LENS, -10.50/+1.5/067 (SPHERE/CYLINDER/AXIS) IN THE PATIENTS LEFT EYE (OS), ON (B)(6) 2020. THE LENS WAS EXPLANTED ON (B)(6) 2020 DUE TO EXCESSIVE VAULTING AND SIGNIFICANT REDUCTION OF IRIDO-CORNEAL ANGLES. THE LENS WAS EXCHANGED FOR A SHORTER LENS AND THE PROBLEM WAS RESOLVED. THE VAULT WAS …	-10.50/+1.5/067	OS	Physician	12/29/2020	2020	26
https://www.accessdata.fda.gov/scripts/cdrh/cfdocs/cfMAUDE/Detail.CFM?MDRFOI__ID=11189761&pc=QCB	2023826-2021-00144	2020-11-02	Injury	STAAR SURGICAL COMPANY	2021-01-18	QCB	IMPLANTABLE COLLAMER LENS (ICL)	Inadequacy of Device Shape and/or Size	Appropriate Clinical Signs, Symptoms, Conditions Term / Code Not Available	NA#S-P#NA	Event Description: THE REPORTER INDICATED THE SURGEON IMPLANTED A 13.7MM VTICM5_13.7 IMPLANTABLE COLLAMER LENS, -10.50/+1.5/104 (SPHERE/CYLINDER/AXIS) IN THE PATIENTS RIGHT EYE (OD), ON (B)(6) 2020. THE LENS WAS EXPLANTED ON (B)(6) 2020 DUE TO EXCESSIVE VAULTING AND SIGNIFICANT REDUCTION OF IRIDO-CORNEAL ANGLES. THE LENS WAS EXCHANGED FOR A SHORTER LENS AND THE PROBLEM WAS RESOLVED. THE VAULT WAS…	-10.50/+1.5/104	OD	Physician	12/29/2020	2020	26
https://www.accessdata.fda.gov/scripts/cdrh/cfdocs/cfMAUDE/Detail.CFM?MDRFOI__ID=11197087&pc=QCB	2023826-2021-00177	2020-12-01 05:00:00	Injury	STAAR SURGICAL COMPANY	2021-01-19 05:00:00	QCB	IMPLANTABLE COLLAMER LENS (ICL)	Inadequacy of Device Shape and/or Size	Appropriate Clinical Signs, Symptoms, Conditions Term / Code Not Available	NA	Event Description: THE REPORTER INDICATED THAT THE SURGEON IMPLANTED A 12.6MM VTICM5_12.6 IMPLANTABLE COLLAMER LENS, -4.5/+2.0/104 (SPHERE/CYLINDER/AXIS), INTO THE PATIENT'S RIGHT EYE (OD) ON (B)(6) 2020. ON (B)(6) 2020 THE LENS WAS EXPLANTED AND REPLACED IN A SEPARATE SURGERY WITH A SHORTER LENS DUE TO EXCESSIVE VAULT AND SIGNIFICANT REDUCTION OF IRIDO-CORNEAL ANGLES (ICA). THE PROBLEM WAS RESOL…	-4.5/+2.0/104	OD		12/23/2020	2020	34
https://www.accessdata.fda.gov/scripts/cdrh/cfdocs/cfMAUDE/Detail.CFM?MDRFOI__ID=11280315&pc=QCB	2023826-2021-00260	2020-09-17 04:00:00	Injury	STAAR SURGICAL COMPANY	2021-02-04 05:00:00	QCB	IMPLANTABLE COLLAMER LENS (ICL)	Off-Label Use; Adverse Event Without Identified Device or Use Problem	Appropriate Clinical Signs, Symptoms, Conditions Term / Code Not Available	NA#S-P#NA	Event Description: THE REPORTER INDICATED THE SURGEON IMPLANTED A 12.6MM VTICM5_12.6 IMPLANTABLE COLLAMER LENS, -02.0/+1.0/177 (SPHERE/CYLINDER/AXIS), IN THE PATIENT'S LEFT EYE (OS), ON (B)(6) 2020. THE LENS WAS EXPLANTED ON (B)(6) 2020 DUE TO ENDOTHELIAL TOUCH AND ANGLE CLOSURE. THE SURGEON DOES NOT PLAN TO IMPLANT ANOTHER LENS. THE PROBLEM WAS RESOLVED. THE CAUSE OF THE EVENT WAS UNKNOWN. Manuf…	-02.0/+1.0/177	OS		01/08/2021	2021	67
https://www.accessdata.fda.gov/scripts/cdrh/cfdocs/cfMAUDE/Detail.CFM?MDRFOI__ID=11290267&pc=QCB	2023826-2021-00303		Injury	STAAR SURGICAL COMPANY	2021-02-06 05:00:00	QCB	IMPLANTABLE COLLAMER LENS (ICL)	Inadequacy of Device Shape and/or Size	Appropriate Clinical Signs, Symptoms, Conditions Term / Code Not Available	NA	Event Description: THE REPORTER INDICATED THAT A 12.6MM, VTICMO12.6, -11.50/3.5/013 (SPHERE/CYLINDER/AXIS), IMPLANTABLE COLLAMER LENS WAS IMPLANTED INTO THE PATIENTS RIGHT EYE (OD). ON (B)(6) 2021 THE LENS WAS EXPLANTED DUE TO EXCESSIVE VAULT AND SIGNIFICANT REDUCTION OF IRIDO-CORNEAL ANGLES. A REPLACEMENT LENS OF SHORTER LENGTH WAS IMPLANTED ON THE SAME DAY WHICH RESOLVED THE PROBLEM. Manufactur…	-11.50/3.5/013	OD	Physician	01/08/2021	2021		Male
https://www.accessdata.fda.gov/scripts/cdrh/cfdocs/cfMAUDE/Detail.CFM?MDRFOI__ID=11290269&pc=QCB	2023826-2021-00304		Injury	STAAR SURGICAL COMPANY	2021-02-06 05:00:00	QCB	IMPLANTABLE COLLAMER LENS (ICL)	Inadequacy of Device Shape and/or Size	Appropriate Clinical Signs, Symptoms, Conditions Term / Code Not Available	NA	Event Description: THE REPORTER INDICATED THAT A 12.6MM, VTICM5_12.6, -4.50/5.5/018 (SPHERE/CYLINDER/AXIS), IMPLANTABLE COLLAMER LENS WAS IMPLANTED INTO THE PATIENTS LEFT EYE (OS). ON (B)(6) 2021 THE LENS WAS EXPLANTED DUE TO EXCESSIVE VAULT AND SIGNIFICANT REDUCTION OF IRIDO-CORNEAL ANGLES. A REPLACEMENT LENS OF SHORTER LENGTH WAS IMPLANTED ON THE SAME DAY WHICH RESOLVED THE PROBLEM. Manufacture…	-4.50/5.5/018	OS	Physician	01/08/2021	2021		Male
https://www.accessdata.fda.gov/scripts/cdrh/cfdocs/cfMAUDE/Detail.CFM?MDRFOI__ID=11311339&pc=QCB	2023826-2021-00379		Malfunction	STAAR SURGICAL COMPANY	2021-02-10	QCB	IMPLANTABLE COLLAMER LENS (ICL)	No Apparent Adverse Event	Appropriate Clinical Signs, Symptoms, Conditions Term / Code Not Available	P030016	Event Description: THE REPORTER INDICATED THAT A 12.6MM, TMICL12.6, -11.00/3.0/089 (SPHERE/CYLINDER/AXIS), IMPLANTABLE COLLAMER LENS WAS IMPLANTED INTO THE PATIENTS RIGHT EYE (OD) ON (B)(6) 2020 AS A REPLACEMENT LENS TO CORRECT EXCESSIVE VAULT AND ELEVATED IOP. IT WAS REPORTED THAT THE LENS RESOLVED THE PROBLEM BUT FOR STATUS OF THE EYE (SIGNS/SYMPTOMS) THE REPORTER REPORTED "PIGMENT DISPERSED ON…	-11.00/3.0/089	OD	Other Health Care Professional	01/13/2021	2021
https://www.accessdata.fda.gov/scripts/cdrh/cfdocs/cfMAUDE/Detail.CFM?MDRFOI__ID=11322755&pc=QCB	2023826-2021-00421	2020-12-28 05:00:00	Injury	STAAR SURGICAL COMPANY	2021-02-12 05:00:00	QCB	IMPLANTABLE COLLAMER LENS (ICL)	Inadequacy of Device Shape and/or Size	Appropriate Clinical Signs, Symptoms, Conditions Term / Code Not Available	NA	Event Description: THE REPORTER INDICATED THAT A 13.2MM, VTICMO13.2, -11.5/2.0/088, IMPLANTABLE COLLAMER LENS WAS IMPLANTED INTO THE PATIENTS LEFT EYE (OS) ON (B)(6) 2020. ON (B)(6) 2020 THE LENS WAS EXCHANGED FOR A SHORTER LENGTH LENS DUE TO EXCESSIVE VAULT AND SIGNIFICANT REDUCTION OF IRIDO-CORNEAL ANGLES. THIS EXCHANGE RESOLVED THE PROBLEM. CAUSE OF THE EVENT WAS REPORTER AS UNKNOWN. Manufactu…	-11.5/2.0/088	OS		01/13/2021	2021	20
https://www.accessdata.fda.gov/scripts/cdrh/cfdocs/cfMAUDE/Detail.CFM?MDRFOI__ID=11368811&pc=QCB	2023826-2021-00467	2020-12-17 05:00:00	Injury	STAAR SURGICAL COMPANY	2021-02-23 05:00:00	QCB	IMPLANTABLE COLLAMER LENS (ICL)	Inadequacy of Device Shape and/or Size	Appropriate Clinical Signs, Symptoms, Conditions Term / Code Not Available	NA#S-P#NA	Event Description: THE REPORTER INDICATED THE SURGEON IMPLANTED A 12.6MM VTICM5_12.6 IMPLANTABLE COLLAMER LENS, -14.0/+2.5/093 (SPHERE/CYLINDER/AXIS) INTO THE PATIENTS LEFT EYE (OS) ON (B)(6) 2020. THE LENS WAS EXPLANTED ON (B)(6) 2021 DUE TO EXCESSIVE VAULTING AND SIGNIFICANT REDUCTION OF IRIDO-CORNEAL ANGLES. THE LENS WAS EXCHANGED FOR A SHORTER LENS AND THE PROBLEM WAS RESOLVED. THE EYE WAS NI…	-14.0/+2.5/093	OS		01/29/2021	2021	36
https://www.accessdata.fda.gov/scripts/cdrh/cfdocs/cfMAUDE/Detail.CFM?MDRFOI__ID=11368830&pc=QCB	2023826-2021-00466	2020-12-17 05:00:00	Injury	STAAR SURGICAL COMPANY	2021-02-23 05:00:00	QCB	IMPLANTABLE COLLAMER LENS (ICL)	Inadequacy of Device Shape and/or Size	Appropriate Clinical Signs, Symptoms, Conditions Term / Code Not Available	NA#S-P#NA	Event Description: THE REPORTER INDICATED THE SURGEON IMPLANTED A 12.6MM VTICM5_12.6 IMPLANTABLE COLLAMER LENS, -14.0/+3.0/086 (SPHERE/CYLINDER/AXIS) INTO THE PATIENTS RIGHT EYE (OD) ON (B)(6) 2020. THE LENS WAS EXPLANTED ON (B)(6) 2021 DUE TO EXCESSIVE VAULTING AND SIGNIFICANT REDUCTION OF IRIDO-CORNEAL ANGLES. THE LENS WAS EXCHANGED FOR A SHORTER LENS AND THE PROBLEM WAS RESOLVED. THE EYE WAS N…	-14.0/+3.0/086	OD		01/29/2021	2021	36
https://www.accessdata.fda.gov/scripts/cdrh/cfdocs/cfMAUDE/Detail.CFM?MDRFOI__ID=11416124&pc=QCB	2023826-2021-00502	2020-11-19 05:00:00	Injury	STAAR SURGICAL COMPANY	2021-03-04 05:00:00	QCB	IMPLANTABLE COLLAMER LENS (ICL)	Inadequacy of Device Shape and/or Size	Appropriate Clinical Signs, Symptoms, Conditions Term / Code Not Available	N/A	Event Description: THE REPORTER INDICATED THAT A 13.2MM, VTICM5_13.2, -11.00/3.5/091 (SPHERE/CYLINDER/AXIS), IMPLANTABLE COLLAMER LENS WAS IMPLANTED INTO THE PATIENT'S LEFT EYE (OS) ON (B)(6) 2020. SIGNIFICANT REDUCTION OF IRIDO-CORNEAL ANGELS AND EXCESSIVE VAULT WERE OBSERVED, THE LENS WAS EXCHANGED FOR A SHORTER LENGTH LENS ON (B)(6) 2020 AND THE PROBLEM WAS RESOLVED. CAUSE OF THE EVENT IS REPO…	-11.00/3.5/091	OS		02/08/2021	2021
https://www.accessdata.fda.gov/scripts/cdrh/cfdocs/cfMAUDE/Detail.CFM?MDRFOI__ID=11441231&pc=QCB	2023826-2021-00623	2021-01-30	Injury	STAAR SURGICAL COMPANY	2021-03-08	QCB	IMPLANTABLE COLLAMER LENS (ICL)	Inadequacy of Device Shape and/or Size	Appropriate Clinical Signs, Symptoms, Conditions Term / Code Not Available	NA	Event Description: THE REPORTER INDICATED THE SURGEON IMPLANTED A 13.2MM VTICM5_13.2 IMPLANTABLE COLLAMER LENS, -11.50/+3.0/090 (SPHERE/CYLINDER/AXIS) IN THE PATIENTS LEFT EYE (OS), ON (B)(6) 2021. THE LENS WAS EXPLANTED ON (B)(6) 2021 DUE TO EXCESSIVE VAULTING AND SIGNIFICANT REDUCTION OF IRIDO-CORNEAL ANGLES. THE LENS WAS EXCHANGED FOR A SHORTER LENS AND THE PROBLEM WAS RESOLVED. THE VAULT GOT …	-11.50/+3.0/090	OS	Physician	02/19/2021	2021	27
https://www.accessdata.fda.gov/scripts/cdrh/cfdocs/cfMAUDE/Detail.CFM?MDRFOI__ID=11441236&pc=QCB	2023826-2021-00622	2021-01-30	Injury	STAAR SURGICAL COMPANY	2021-03-08	QCB	IMPLANTABLE COLLAMER LENS (ICL)	Inadequacy of Device Shape and/or Size	Appropriate Clinical Signs, Symptoms, Conditions Term / Code Not Available	NA	Event Description: THE REPORTER INDICATED THE SURGEON IMPLANTED A 13.2MM VTICM5_13.2 IMPLANTABLE COLLAMER LENS, -11.50/+3.0/091 (SPHERE/CYLINDER/AXIS) IN THE PATIENTS RIGHT EYE (OD), ON (B)(6) 2021. THE LENS WAS EXPLANTED ON (B)(6) 2021 DUE TO EXCESSIVE VAULTING AND SIGNIFICANT REDUCTION OF IRIDO-CORNEAL ANGLES. THE LENS WAS EXCHANGED FOR A SHORTER LENS AND THE PROBLEM WAS RESOLVED. THE VAULT GOT…	-11.50/+3.0/091	OD	Physician	02/19/2021	2021	27
https://www.accessdata.fda.gov/scripts/cdrh/cfdocs/cfMAUDE/Detail.CFM?MDRFOI__ID=11558793&pc=QCB	2023826-2021-00719	2021-02-01 05:00:00	Injury	STAAR SURGICAL COMPANY	2021-03-23 04:00:00	QCB	IMPLANTABLE COLLAMER LENS (ICL)	Adverse Event Without Identified Device or Use Problem	Appropriate Clinical Signs, Symptoms, Conditions Term / Code Not Available	NA	Event Description: THE REPORTER INDICATED THAT THE SURGEON IMPLANTED A 13.2MM VTICM5_13.2 IMPLANTABLE COLLAMER LENS, -8.0/+1.0/003 (SPHERE/CYLINDER/AXIS), INTO THE PATIENT'S RIGHT EYE (OD) ON (B)(6) 2021. ON (B)(6) 2021 THE LENS WAS EXCHANGED WITH A SHORTER LENS DUE TO SIGNIFICANT REDUCTION OF IRIDO-CORNEAL ANGLES (ICA). THE PROBLEM WAS RESOLVED. THE CAUSE OF THE EVENT IS REPORTED AS DEVICE: "LEN…	-8.0/+1.0/003	OD		03/08/2021	2021	38
https://www.accessdata.fda.gov/scripts/cdrh/cfdocs/cfMAUDE/Detail.CFM?MDRFOI__ID=11558799&pc=QCB	2023826-2021-00705	2021-02-11 05:00:00	Injury	STAAR SURGICAL COMPANY	2021-03-23 04:00:00	QCB	IMPLANTABLE COLLAMER LENS (ICL)	Inadequacy of Device Shape and/or Size	Appropriate Clinical Signs, Symptoms, Conditions Term / Code Not Available	N/A	Event Description: THE REPORTER INDICATED THE SURGEON IMPLANTED A 13.2MM VTICM5_13.2 IMPLANTABLE COLLAMER LENS, -5.5/+4.5/100 (SPHERE/CYLINDER/AXIS) INTO THE PATIENT'S RIGHT EYE (OD). THE SURGEON REPORTS EXCESSIVE VAULT AND SIGNIFICANT REDUCTION OF IRIDO-CORNEAL ANGLES (ICA). REPORTEDLY, THE LENS REMAINS IMPLANTED. THE CAUSE OF THE EVENT IS REPORTED AS UNKNOWN. Manufacturer Narrative: B5: THE REP…	-5.5/+4.5/100	OD	Physician	02/24/2021	2021	24	Female
https://www.accessdata.fda.gov/scripts/cdrh/cfdocs/cfMAUDE/Detail.CFM?MDRFOI__ID=11585607&pc=QCB	2023826-2021-00809	2021-02-06	Malfunction	STAAR SURGICAL COMPANY	2021-03-29	QCB	IMPLANTABLE COLLAMER LENS (ICL)	Off-Label Use; Inadequacy of Device Shape and/or Size	Appropriate Clinical Signs, Symptoms, Conditions Term / Code Not Available	NA	Event Description: THE REPORTER INDICATED THE SURGEON INSERTED AND REMOVED A 12.6MM VTICMO12.6 IMPLANTABLE COLLAMER LENS, -06.00/+1.0/089 (SPHERE/CYLINDER/AXIS), WITHIN THE SAME SURGERY DUE TO EXCESSIVE VAULTING AND SIGNIFICANT REDUCTION OF IRIDO-CORNEAL ANGLES. THE LENS WAS REPLACED DURING THE SAME SURGERY WITH A SHORTER LENS AND THE PROBLEM WAS RESOLVED. CAUSE OF THE EVENT WAS UNKNOWN. Manufact…	-06.00/+1.0/089	NA	Physician	03/02/2021	2021	31
https://www.accessdata.fda.gov/scripts/cdrh/cfdocs/cfMAUDE/Detail.CFM?MDRFOI__ID=11606789&pc=QCB	2023826-2021-00837	2021-01-27	Injury	STAAR SURGICAL COMPANY	2021-04-02	QCB	IMPLANTABLE COLLAMER LENS (ICL)	Inadequacy of Device Shape and/or Size	Appropriate Clinical Signs, Symptoms, Conditions Term / Code Not Available	NA	Event Description: THE REPORTER INDICATED THAT A 13.2MM, VTICM5_13.2, -9.5/1.5/090 (SPHERE/CYLIBDER/AXIS), IMPLANTABLE COLLAMER LENS WAS IMPLANTED INTO THE PATIENTS LEFT EYE (OS) ON (B)(6) 2021. ON (B)(6) 2021 THE LENS WAS EXCHANGED FOR A SHORTER LENGTH LENS DUE TO EXCESSIVE VAULT AND SIGNIFICANT REDUCTION OF IRIDO-CORNEAL ANGLES. THIS EXCHANGE RESOLVED THE PROBLEM. Manufacturer Narrative: PMA/51…	-9.5/1.5/090	OS	Physician	03/04/2021	2021	30
https://www.accessdata.fda.gov/scripts/cdrh/cfdocs/cfMAUDE/Detail.CFM?MDRFOI__ID=11616791&pc=QCB	2023826-2021-00843	2021-03-11 05:00:00	Malfunction	STAAR SURGICAL COMPANY	2021-04-05 04:00:00	QCB	IMPLANTABLE COLLAMER LENS (ICL)	No Apparent Adverse Event	Appropriate Clinical Signs, Symptoms, Conditions Term / Code Not Available	P030016	Event Description: THE REPORTER INDICATED THE SURGEON INSERTED A 12.6MM TMICL12.6 IMPLANTABLE COLLAMER LENS, -07.00/+4.0/121 (SPHERE/CYLINDER/AXIS). THE LENS WAS PARTLY INSERTED AND WAS REMOVED, SO IT COULD BE RELOADED. THE SURGEON NOTED AT THAT TIME THAT THERE WAS PIGMENT ON THE LENS. THE REPORTER INDICATED THE LENS WAS LOADED IMPROPERLY. THE BACKUP LENS WAS IMPLANTED. ADDITIONAL INFORMATION HAS…	-07.00/+4.0/121	NA		03/16/2021	2021	29
https://www.accessdata.fda.gov/scripts/cdrh/cfdocs/cfMAUDE/Detail.CFM?MDRFOI__ID=11648974&pc=QCB	2023826-2021-00948	2021-03-03 05:00:00	Malfunction	STAAR SURGICAL COMPANY	2021-04-12 04:00:00	QCB	IMPLANTABLE COLLAMER LENS (ICL)	Off-Label Use; Inadequacy of Device Shape and/or Size	Appropriate Clinical Signs, Symptoms, Conditions Term / Code Not Available	NA	Event Description: THE REPORTER INDICATED THE SURGEON INSERTED AND REMOVED A 13.7MM VTICMO13.7 IMPLANTABLE COLLAMER LENS, -12.50/+5.0/086 (SPHERE/CYLINDER/AXIS), WITHIN THE SAME SURGERY DUE TO EXCESSIVE VAULTING AND SIGNIFICANT REDUCTION OF IRIDO-CORNEAL ANGLES. THE LENS WAS REPLACED DURING THE SAME SURGERY WITH A SHORTER LENS AND THE PROBLEM WAS RESOLVED. CAUSE OF THE EVENT WAS UNKNOWN. Manufact…	-12.50/+5.0/086	NA		03/23/2021	2021	20
https://www.accessdata.fda.gov/scripts/cdrh/cfdocs/cfMAUDE/Detail.CFM?MDRFOI__ID=11653731&pc=QCB	2023826-2021-00949	2021-03-03 05:00:00	Malfunction	STAAR SURGICAL COMPANY	2021-04-12 04:00:00	QCB	IMPLANTABLE COLLAMER LENS (ICL)	Off-Label Use; Inadequacy of Device Shape and/or Size	Appropriate Clinical Signs, Symptoms, Conditions Term / Code Not Available	NA	Event Description: THE REPORTER INDICATED THE SURGEON INSERTED AND REMOVED A 13.7MM VTICMO13.7 IMPLANTABLE COLLAMER LENS, -13.00/+5.0/087 (SPHERE/CYLINDER/AXIS), WITHIN THE SAME SURGERY DUE TO EXCESSIVE VAULTING AND SIGNIFICANT REDUCTION OF IRIDO-CORNEAL ANGLES. THE LENS WAS REPLACED DURING THE SAME SURGERY WITH A SHORTER LENS AND THE PROBLEM WAS RESOLVED. CAUSE OF THE EVENT WAS UNKNOWN. Manufact…	-13.00/+5.0/087	NA		03/23/2021	2021	20
https://www.accessdata.fda.gov/scripts/cdrh/cfdocs/cfMAUDE/Detail.CFM?MDRFOI__ID=11653733&pc=QCB	2023826-2021-00988	2021-03-22 04:00:00	Injury	STAAR SURGICAL COMPANY	2021-04-12 04:00:00	QCB	IMPLANTABLE COLLAMER LENS (ICL)	Inadequacy of Device Shape and/or Size	Appropriate Clinical Signs, Symptoms, Conditions Term / Code Not Available	NA	Event Description: THE REPORTER INDICATED THE SURGEON IMPLANTED A 12.6MM VTICM5_12.6 IMPLANTABLE COLLAMER LENS, -12.50/+1.5/095 (SPHERE/CYLINDER/AXIS) IN THE PATIENTS RIGHT EYE (OD) ON (B)(6) 2021. THE LENS WAS REPORTED AS EXCESSIVE VAULTING AND SIGNIFICANT REDUCTION OF IRIDO-CORNEAL ANGLES. THE LENS REMAINED IMPLANTED. THE CAUSE OF THE EVENT WAS DUE TO THE ICL WAS TOO LONG FOR THE EYE, WHICH MAY…	-12.50/+1.5/095	OD		03/23/2021	2021	29
https://www.accessdata.fda.gov/scripts/cdrh/cfdocs/cfMAUDE/Detail.CFM?MDRFOI__ID=11714192&pc=QCB	2023826-2021-01113	2020-12-01	Injury	STAAR SURGICAL COMPANY	2021-04-23	QCB	IMPLANTABLE COLLAMER LENS (ICL)	Off-Label Use; Inadequacy of Device Shape and/or Size	Appropriate Clinical Signs, Symptoms, Conditions Term / Code Not Available	NA	Event Description: THE REPORTER INDICATED THAT A 12.6MM, VTICMO12.6, -10.5/1.5/86 (SPHERE/CYLINDER/AXIS), IMPLANTABLE COLLAMER LENS WAS IMPLANTED INTO THE PATIENTS LEFT EYE (OS) ON (B)(6) 2020. THE LENS WAS LATER EXCHANGED FOR A SHORTER LENGTH LENS DUE TO EXCESSIVE VAULT AND SIGNIFICANT REDUCTION OF IRIDO-CORNEAL ANGELS. THIS EXCHANGE RESOLVED THE PROBLEM. CAUSE OF THE EVENT WAS REPORTER AS UNKNO…	-10.5/1.5/86	OS	Physician	03/24/2021	2021	25
https://www.accessdata.fda.gov/scripts/cdrh/cfdocs/cfMAUDE/Detail.CFM?MDRFOI__ID=11713226&pc=QCB	2023826-2021-01142	2018-09-01 04:00:00	Injury	STAAR SURGICAL COMPANY	2021-04-23 04:00:00	QCB	IMPLANTABLE COLLAMER LENS (ICL)	Adverse Event Without Identified Device or Use Problem	Appropriate Clinical Signs, Symptoms, Conditions Term / Code Not Available	NA	Event Description: THE REPORTER INDICATED THE SURGEON IMPLANTED A 13.2MM VTICMO13.2 IMPLANTABLE COLLAMER LENS, -18.00/+2.5/101 (SPHERE/CYLINDER/AXIS), IN THE PATIENTS LEFT EYE (OS) ON (B)(6) 2017. THE REPORTER INDICATED THE PATIENT HAD SIGNIFICANT REDUCTION OF ENDOTHELIAL CELL COUNT OR SIGNIFICANT ENDOTHELIAL CELL LOSS OVER A PERIOD OF 3 YEARS. THE SURGEON HAS DECIDED TO LEAVE THE LENS IMPLANTED …	-18.00/+2.5/101	OS		03/25/2021	2021	30
https://www.accessdata.fda.gov/scripts/cdrh/cfdocs/cfMAUDE/Detail.CFM?MDRFOI__ID=11721499&pc=QCB	2023826-2021-01159	2020-11-20	Injury	STAAR SURGICAL COMPANY	2021-04-24	QCB	IMPLANTABLE COLLAMER LENS (ICL)	Inadequacy of Device Shape and/or Size	Appropriate Clinical Signs, Symptoms, Conditions Term / Code Not Available	NA	Event Description: THE REPORTER INDICATED THE SURGEON IMPLANTED A 13.7MM VTICMO13.7 IMPLANTABLE COLLAMER LENS, -09.00/+3.0/093 (SPHERE/CYLINDER/AXIS), IN THE PATIENTS LEFT EYE (OS), ON (B)(6) 2020. THE LENS WAS EXPLANTED LATER THAT SAME DAY DUE TO EXCESSIVE VAULTING AND SIGNIFICANT REDUCTION OF IRIDO-CORNEAL ANGLES. THE LENS WAS EXCHANGED FOR A SHORTER LENS AND THE PROBLEM WAS RESOLVED. THE CAUSE…	-09.00/+3.0/093	OS	Physician	03/26/2021	2021	32
https://www.accessdata.fda.gov/scripts/cdrh/cfdocs/cfMAUDE/Detail.CFM?MDRFOI__ID=11738879&pc=QCB	2023826-2021-01193	2018-10-30	Injury	STAAR SURGICAL COMPANY	2021-04-28	QCB	IMPLANTABLE COLLAMER LENS (ICL)	Adverse Event Without Identified Device or Use Problem	Appropriate Clinical Signs, Symptoms, Conditions Term / Code Not Available	N/A	Event Description: THE REPORTER INDICATED THAT THE SURGEON IMPLANTED A 13.2 MM VTICMO13.2, -6.50/2.0/081 (SPHERE/CYLINDER/AXIS), IMPLANTABLE COLLAMER LENS INTO THE PATIENT'S RIGHT EYE (OD) ON (B)(6) 2018. THE LENS WAS EXPLANTED ON (B)(6) 2019 DUE TO PIGMENT DISPERSION. THIS RESOLVED THE PROBLEM. REPORTEDLY, IN ORDER TO PREVENT THE ADVERSE EFFECTS CAUSED BY LONG-TERM EXISTENCE IN THE FUTURE, THE L…	-6.50/2.0/081	OD	Physician	04/06/2021	2021	44
https://www.accessdata.fda.gov/scripts/cdrh/cfdocs/cfMAUDE/Detail.CFM?MDRFOI__ID=11738956&pc=QCB	2023826-2021-01200	2020-09-10	Malfunction	STAAR SURGICAL COMPANY	2021-04-28	QCB	IMPLANTABLE COLLAMER LENS (ICL)	Off-Label Use; Inadequacy of Device Shape and/or Size	Appropriate Clinical Signs, Symptoms, Conditions Term / Code Not Available	N/A	Event Description: THE REPORTER INDICATED THAT A 13.2MM, VTICMO13.2, -12.0/2.5/081 (SPHERE/CYLINDER/AXIS), IMPLANTABLE COLLAMER LENS WAS IMPLANTED, REMOVED, AND REPLACED INTRAOPERATIVELY INTO THE PATIENT'S RIGHT EYE (OD) ON (B)(6) 2020 DUE TO SIGNIFICANT REDUCTION OF IRIDO-CORNEAL ANGLES AND EXCESSIVE VAULT. THE REPLACEMENT LENS WAS A SHORTER LENGTH LENS AND THE PROBLEM WAS RESOLVED. CAUSE OF THE…	-12.0/2.5/081	OD	Physician	04/06/2021	2021	20
https://www.accessdata.fda.gov/scripts/cdrh/cfdocs/cfMAUDE/Detail.CFM?MDRFOI__ID=11738883&pc=QCB	2023826-2021-01190	2021-03-29 04:00:00	Injury	STAAR SURGICAL COMPANY	2021-04-28 04:00:00	QCB	IMPLANTABLE COLLAMER LENS (ICL)	Inadequacy of Device Shape and/or Size	Appropriate Clinical Signs, Symptoms, Conditions Term / Code Not Available	N/A	Event Description: THE REPORTER INDICATED THAT A 13.2MM, VTICMO13.2, -7.00/1.0/092 (SPHERE/CYLINDER/AXIS), IMPLANTABLE COLLAMER LENS WAS IMPLANTED INTO THE PATIENT'S RIGHT EYE (OD) ON (B)(6) 2021. SIGNIFICANT REDUCTION OF IRIDO-CORNEAL ANGELS AND EXCESSIVE VAULT WERE OBSERVED. THE LENS REMAINS IMPLANTED. REPORTEDLY, IRIS ALMOST TOUCHING ENDOTHELIUM IN THE TEMPORAL SECTOR. MEDICATION FOR IOP MANAG…	-7.00/1.0/092	OD	Physician	04/05/2021	2021	31	Female
https://www.accessdata.fda.gov/scripts/cdrh/cfdocs/cfMAUDE/Detail.CFM?MDRFOI__ID=11788212&pc=QCB	2023826-2021-01362	2020-10-23	Injury	STAAR SURGICAL COMPANY	2021-05-06	QCB	IMPLANTABLE COLLAMER LENS (ICL)	Off-Label Use; Inadequacy of Device Shape and/or Size	Appropriate Clinical Signs, Symptoms, Conditions Term / Code Not Available	NA	Event Description: THE REPORTER INDICATED THAT THE SURGEON IMPLANTED A 13.2MM VTICMO13.2 IMPLANTABLE COLLAMER LENS, -16.5/+4.5/091 (SPHERE/CYLINDER/AXIS), INTO THE PATIENT'S LEFT EYE (OS) ON (B)(6) 2020. ON (B)(6) 2021 THE LENS WAS EXCHANGED WITH A SHORTER LENGTH LENS DUE TO EXCESSIVE VAULT AND SIGNIFICANT REDUCTION OF IRIDO-CORNEAL ANGLES (ICA). THE PROBLEM WAS RESOLVED. THE CAUSE OF THE EVENT I…	-16.5/+4.5/091	OS	Physician	04/13/2021	2021	19
https://www.accessdata.fda.gov/scripts/cdrh/cfdocs/cfMAUDE/Detail.CFM?MDRFOI__ID=11788231&pc=QCB	2023826-2021-01361	2020-10-22	Injury	STAAR SURGICAL COMPANY	2021-05-06	QCB	IMPLANTABLE COLLAMER LENS (ICL)	Off-Label Use; Inadequacy of Device Shape and/or Size	Appropriate Clinical Signs, Symptoms, Conditions Term / Code Not Available	NA	Event Description: THE REPORTER INDICATED THAT THE SURGEON IMPLANTED A 13.2MM VTICMO13.2 IMPLANTABLE COLLAMER LENS, -18.0/+4.5/090 (SPHERE/CYLINDER/AXIS), INTO THE PATIENT'S RIGHT EYE (OD) ON (B)(6) 2020. ON (B)(6) 2021 THE LENS WAS EXCHANGED WITH A SHORTER LENGTH LENS DUE TO EXCESSIVE VAULT AND SIGNIFICANT REDUCTION OF IRIDO-CORNEAL ANGLES (ICA). THE PROBLEM WAS RESOLVED. THE CAUSE OF THE EVENT …	-18.0/+4.5/090	OD	Physician	04/13/2021	2021	19
https://www.accessdata.fda.gov/scripts/cdrh/cfdocs/cfMAUDE/Detail.CFM?MDRFOI__ID=11860720&pc=QCB	2023826-2021-01581	2021-04-09	Injury	STAAR SURGICAL COMPANY	2021-05-20	QCB	IMPLANTABLE COLLAMER LENS (ICL)	Inadequacy of Device Shape and/or Size	Appropriate Clinical Signs, Symptoms, Conditions Term / Code Not Available	NA	Event Description: THE REPORTER INDICATED THAT THE SURGEON IMPLANTED A 12.6MM VTICMO12.6 IMPLANTABLE COLLAMER LENS, -7.5/+1.5/018 (SPHERE/CYLINDER/AXIS), INTO THE PATIENT'S RIGHT EYE (OD) ON (B)(6) 2021. ON (B)(6) 2021 THE LENS WAS EXCHANGED WITH A LONGER LENGTH LENS DUE TO EXCESSIVE VAULT AND SIGNIFICANT REDUCTION OF IRIDO-CORNEAL ANGLES (ICA). THE PROBLEM WAS RESOLVED. THE CAUSE OF THE EVENT IS…	-7.5/+1.5/018	OD	Physician	04/26/2021	2021	30
https://www.accessdata.fda.gov/scripts/cdrh/cfdocs/cfMAUDE/Detail.CFM?MDRFOI__ID=11855240&pc=QCB	2023826-2021-01521	2021-04-14 04:00:00	Injury	STAAR SURGICAL COMPANY	2021-05-20 04:00:00	QCB	IMPLANTABLE COLLAMER LENS (ICL)	Misfocusing; Inadequacy of Device Shape and/or Size	Appropriate Clinical Signs, Symptoms, Conditions Term / Code Not Available	P030016	Event Description: THE REPORTER INDICATED THAT A 13.2MM, TMICL13.2, -13.00/1.0/070 (SPHERE/CYLINDER/AXIS), IMPLANTABLE COLLAMER LENS WAS IMPLANTED INTO THE PATIENT'S LEFT EYE (OS) ON (B)(6) 2021. ON (B)(6) 2021 THE LENS WAS EXPLANTED DUE TO SIGNIFICANT REDUCTION OF IRIDO-CORNEAL ANGLES, TRANSIENT LOSS OF BCVA, EXCESSIVE VAULT, IRIS ATROPHY, AND UNREACTIVE(FIXED) PUPIL BEING OBSERVED. CAUSE OF THE…	-13.00/1.0/070	OS		04/14/2021	2021	40
https://www.accessdata.fda.gov/scripts/cdrh/cfdocs/cfMAUDE/Detail.CFM?MDRFOI__ID=11894537&pc=QCB	2023826-2021-01719	2021-04-29 04:00:00	Injury	STAAR SURGICAL COMPANY	2021-05-27 04:00:00	QCB	IMPLANTABLE COLLAMER LENS (ICL)	Inadequacy of Device Shape and/or Size	Appropriate Clinical Signs, Symptoms, Conditions Term / Code Not Available	NA	Event Description: THE REPORTER INDICATED THAT THE SURGEON IMPLANTED A 13.2MM VTICMO13.2 IMPLANTABLE COLLAMER LENS, -16.5/+1.0/024 (SPHERE/CYLINDER/AXIS), INTO THE PATIENT'S LEFT EYE (OS) ON (B)(6)2021. THE SURGEON REPORTS EXCESSIVE VAULT AND NARROW IRIS CORNEAL ANGLE. REPORTEDLY, THE LENS REMAINS IMPLANTED. THE CAUSE OF THE EVENT IS REPORTED AS UNKNOWN. Manufacturer Narrative: B5: UPDATED INFORM…	-16.5/+1.0/024	OS		05/04/2021	2021	23
https://www.accessdata.fda.gov/scripts/cdrh/cfdocs/cfMAUDE/Detail.CFM?MDRFOI__ID=11942670&pc=QCB	2023826-2021-01764	2021-05-12 04:00:00	Injury	STAAR SURGICAL COMPANY	2021-06-04 04:00:00	QCB	IMPLANTABLE COLLAMER LENS (ICL)	Inadequacy of Device Shape and/or Size	Appropriate Clinical Signs, Symptoms, Conditions Term / Code Not Available	P030016	Event Description: THE REPORTER INDICATED THAT THE SURGEON IMPLANTED A 12.6MM TMICL12.6 LENS, -15.0/+2.5/109 (SPHERE/CYLINDER/AXIS) INTO THE PATIENT'S LEFT (OS) EYE ON (B)(6) 2021. ON (B)(6) 2021 THE LENS WAS EXPLANTED AND REPLACED WITH A SHORTER LENS DUE TO EXCESSIVE VAULT AND NARROW ANGLES. THE PROBLEM IS RESOLVED. Manufacturer Narrative: B5-ADDITIONAL INFO: "DESPITE ALL CALCULATIONS INDICATING…	-15.0/+2.5/109	OS		05/14/2021	2021	32
https://www.accessdata.fda.gov/scripts/cdrh/cfdocs/cfMAUDE/Detail.CFM?MDRFOI__ID=11966818&pc=QCB	2023826-2021-01817	2021-04-21 04:00:00	Injury	STAAR SURGICAL COMPANY	2021-06-09 04:00:00	QCB	IMPLANTABLE COLLAMER LENS (ICL)	Inadequacy of Device Shape and/or Size; Patient-Device Incompatibility	Appropriate Clinical Signs, Symptoms, Conditions Term / Code Not Available	N/A	Event Description: THE REPORTER INDICATED THAT THE SURGEON IMPLANTED A 13.7MM VTICM5_13.7, -4.50/6.0/008 (SPHERE/CYLINDER/AXIS), IMPLANTABLE COLLAMER LENS INTO THE PATIENT'S LEFT EYE (OS) ON (B)(6) 2021. SIGNIFICANT REDUCTION OF IRIDO-CORNEAL ANGLES AND EXCESSIVE VAULT WAS OBSERVED. LENS REMAINS IMPLANTED. CAUSE OF THE EVENT IS REPORTED AS PATIENT-RELATED FACTOR, WTW DIFFERENT FROM STS. PER REPOR…	-4.50/6.0/008	OS		05/18/2021	2021	44
https://www.accessdata.fda.gov/scripts/cdrh/cfdocs/cfMAUDE/Detail.CFM?MDRFOI__ID=12006531&pc=QCB	2023826-2021-01910	2021-04-06	Malfunction	STAAR SURGICAL COMPANY	2021-06-16	QCB	IMPLANTABLE COLLAMER LENS (ICL)	Inadequacy of Device Shape and/or Size	Appropriate Clinical Signs, Symptoms, Conditions Term / Code Not Available	NA	Event Description: THE REPORTER INDICATED THAT A 12.6MM, VTICMO12.6, -7.5/1.0/75 (SPHERE/CYLINDER/AXIS), IMPLANTABLE COLLAMER LENS WAS IMPLANTED INTO THE PATIENTS LEFT EYE (OS) ON (B)(6) 2021. THE LENS WAS REMOVED AND REPLACED WITH A SHORTER LENGTH LENS DUE TO EXCESSIVE VAULT AND SIGNIFICANT REDUCTION OF IRIDO-CORNEAL ANGLES. IT WAS REPORTED THAT THE PROBLEM RESOLVED. CAUSE OF EVENT WAS UNKNOWN. …	-7.5/1.0/75	OS	Physician	05/18/2021	2021	39
https://www.accessdata.fda.gov/scripts/cdrh/cfdocs/cfMAUDE/Detail.CFM?MDRFOI__ID=12009103&pc=QCB	2023826-2021-01882	2021-03-12	Injury	STAAR SURGICAL COMPANY	2021-06-16	QCB	IMPLANTABLE COLLAMER LENS (ICL)	Inadequacy of Device Shape and/or Size	Appropriate Clinical Signs, Symptoms, Conditions Term / Code Not Available	N/A	Event Description: THE REPORTER INDICATED THAT THE SURGEON IMPLANTED A 13.2MM VTICMO13.2, -5.50/6.0/099 (SPHERE/CYLINDER/AXIS), IMPLANTABLE COLLAMER LENS INTO THE PATIENT'S LEFT EYE (OS) ON (B)(6) 2021. THE LENS WAS EXCHANGED WITH A SHORTER LENGTH LENS DUE TO SIGNIFICANT REDUCTION OF IRIDO-CORNEAL ANGLES AND EXCESSIVE VAULT ON (B)(6) 2021. THIS RESOLVED THE PROBLEM. CAUSE OF THE EVENT IS REPORTED…	-5.50/6.0/099	OS	Physician	05/26/2021	2021	37
https://www.accessdata.fda.gov/scripts/cdrh/cfdocs/cfMAUDE/Detail.CFM?MDRFOI__ID=12029494&pc=QCB	2023826-2021-01915	2020-11-21 05:00:00	Malfunction	STAAR SURGICAL COMPANY	2021-06-18 04:00:00	QCB	IMPLANTABLE COLLAMER LENS (ICL)	Inadequacy of Device Shape and/or Size	Appropriate Clinical Signs, Symptoms, Conditions Term / Code Not Available	NA	Event Description: THE REPORTER INDICATED THAT A 13.7MM, VTICM5_13.7, -7.5/0.5/004 (SPHERE/CYLINDER/AXIS), IMPLANTABLE COLLAMER LENS WAS IMPLANTED INTO THE PATIENTS RIGHT EYE (OD) ON (B)(6) 2020. EXCESSIVE VAULT WAS OBSERVED. IT WAS REPORTED THAT NO INTERVENTION WAS NECESSARY AND PROBLEM RESOLVED. FOR STATUS OF THE EYE (SIGNS/SYMPTOMS) THE REPORTER STATED " QUIET EYE, WE ARE MONITORING AND HAVE D…	-7.5/0.5/004	OD	Physician	05/19/2021	2021	39	Female
https://www.accessdata.fda.gov/scripts/cdrh/cfdocs/cfMAUDE/Detail.CFM?MDRFOI__ID=12093373&pc=QCB	2023826-2021-02188	2021-03-15	Injury	STAAR SURGICAL COMPANY	2021-06-30	QCB	IMPLANTABLE COLLAMER LENS (ICL)	Inadequacy of Device Shape and/or Size	Appropriate Clinical Signs, Symptoms, Conditions Term / Code Not Available	NA	Event Description: THE REPORTER INDICATED THE SURGEON IMPLANTED A 13.2MM VTICM5_13.2 IMPLANTABLE COLLAMER LENS, -10.50/+0.5/069 (SPHERE/CYLINDER/AXIS) IN THE PATIENTS LEFT EYE (OS), ON (B)(6) 2021. THE LENS WAS EXPLANTED ON (B)(6) 2021 DUE TO EXCESSIVE VAULTING AND SIGNIFICANT REDUCTION OF IRIDO-CORNEAL ANGLES. THE LENS WAS EXCHANGED FOR A SHORTER LENS AND THE PROBLEM WAS RESOLVED. THE PATIENT IS…	-10.50/+0.5/069	OS	Physician	06/03/2021	2021	26
https://www.accessdata.fda.gov/scripts/cdrh/cfdocs/cfMAUDE/Detail.CFM?MDRFOI__ID=12102781&pc=QCB	2023826-2021-02149	2020-12-26	Injury	STAAR SURGICAL COMPANY	2021-07-01	QCB	IMPLANTABLE COLLAMER LENS (ICL)	Inadequacy of Device Shape and/or Size	Appropriate Clinical Signs, Symptoms, Conditions Term / Code Not Available	N/A	Event Description: THE REPORTER INDICATED THAT THE SURGEON IMPLANTED A 13.2MM VTICMO13.2, -10.00/2.0/075 (SPHERE/CYLINDER/AXIS), IMPLANTABLE COLLAMER LENS INTO THE PATIENT'S RIGHT EYE (OD) ON (B)(6)2020. THE LENS WAS REPLACED WITH A SHORTER LENGTH LENS DUE TO SIGNIFICANT REDUCTION OF IRIDO-CORNEAL ANGLES AND EXCESSIVE VAULT ON (B)(6) 2020. THIS RESOLVED THE PROBLEM. CAUSE OF THE EVENT IS REPORTED…	-10.00/2.0/075	OD	Physician	06/09/2021	2021	24
https://www.accessdata.fda.gov/scripts/cdrh/cfdocs/cfMAUDE/Detail.CFM?MDRFOI__ID=12102791&pc=QCB	2023826-2021-02154		Injury	STAAR SURGICAL COMPANY	2021-07-01	QCB	IMPLANTABLE COLLAMER LENS (ICL)	Inadequacy of Device Shape and/or Size	Appropriate Clinical Signs, Symptoms, Conditions Term / Code Not Available	N/A	Event Description: THE REPORTER INDICATED THAT THE SURGEON IMPLANTED A 13.2MM VTICMO13.2, -16.50/2.0/092 (SPHERE/CYLINDER/AXIS), IMPLANTABLE COLLAMER LENS INTO THE PATIENT'S RIGHT EYE (OD) ON (B)(6) 2020. THE LENS WAS REPLACED WITH A SHORTER LENGTH LENS DUE TO SIGNIFICANT REDUCTION OF IRIDO-CORNEAL ANGLES AND EXCESSIVE VAULT ON (B)(6) 2020. THIS RESOLVED THE PROBLEM. Manufacturer Narrative: WEIGH…	-16.50/2.0/092	OD	Physician	06/09/2021	2021
https://www.accessdata.fda.gov/scripts/cdrh/cfdocs/cfMAUDE/Detail.CFM?MDRFOI__ID=12222278&pc=QCB	2023826-2021-02856	2021-05-17	Injury	STAAR SURGICAL COMPANY	2021-07-23	QCB	IMPLANTABLE COLLAMER LENS (ICL)	Inadequacy of Device Shape and/or Size	Appropriate Clinical Signs, Symptoms, Conditions Term / Code Not Available	N/A	Event Description: THE REPORTER INDICATED THAT A 13.2MM VTICM5_13.2, -6.5/+6.0/148 (SPHERE/CYLINDER/AXIS) IMPLANTABLE COLLAMER LENS WAS IMPLANTED INTO THE PATIENT'S RIGHT EYE (OD) ON (B)(6) 2021. ON (B)(6) 2021 AN ADDITIONAL PI-YAG WAS ADDED, THE SURGEON REPORTING EXCESSIVE VAULT AND SIGNIFICANT REDUCTION OF IRIDO-CORNEAL ANGLES (ICA). THE CAUSE OF THE EVENT IS REPORTED AS OTHER: "APPARENTLY THE …	-6.5/+6.0/148	OD	Physician	07/01/2021	2021	36
https://www.accessdata.fda.gov/scripts/cdrh/cfdocs/cfMAUDE/Detail.CFM?MDRFOI__ID=12233901&pc=QCB	2023826-2021-02931	2021-07-05	Injury	STAAR SURGICAL COMPANY	2021-07-27	QCB	IMPLANTABLE COLLAMER LENS (ICL)	Off-Label Use; Inadequacy of Device Shape and/or Size; Patient-Device Incompatibility	Appropriate Clinical Signs, Symptoms, Conditions Term / Code Not Available		Event Description: THE REPORTER INDICATED THAT THE SURGEON IMPLANTED A 12.6MM VTICMO12.6; -13.0/1.5/72 (SPHERE/CYLINDER/AXIS) IMPLANTABLE COLLAMER LENS INTO THE PATIENT'S RIGHT EYE (OD) ON (B)(6) 2020. ON (B)(6) 2021 THE LENS EXPLANTED DUE TO THE PATIENT COMPLAINED OF EYE DISTENSION AND DEMANDED TO REMOVE THE LENS. IT WAS NOTED "THE EXAMINATION RESULTS WERE NORMAL". THE CAUSE OF THE EVENT WAS REP…	-13.0/1.5/72	OD	Physician	07/21/2021	2021	22
https://www.accessdata.fda.gov/scripts/cdrh/cfdocs/cfMAUDE/Detail.CFM?MDRFOI__ID=12235122&pc=QCB	2023826-2021-02932	2021-07-05	Injury	STAAR SURGICAL COMPANY	2021-07-27	QCB	IMPLANTABLE COLLAMER LENS (ICL)	Off-Label Use; Inadequacy of Device Shape and/or Size; Patient-Device Incompatibility	Appropriate Clinical Signs, Symptoms, Conditions Term / Code Not Available		Event Description: THE REPORTER INDICATED THAT THE SURGEON IMPLANTED A 12.6MM VTICMO12.6; -12.0/1.0/89 (SPHERE/CYLINDER/AXIS) IMPLANTABLE COLLAMER LENS INTO THE PATIENT'S LEFT EYE (OS) ON (B)(6) 2020. ON (B)(6) 2021 THE LENS EXPLANTED DUE TO THE PATIENT COMPLAINED OF EYE DISTENSION AND DEMANDED TO REMOVE THE LENS. IT WAS NOTED "THE EXAMINATION RESULTS WERE NORMAL". THE CAUSE OF THE EVENT WAS REPO…	-12.0/1.0/89	OS	Physician	07/21/2021	2021	22
https://www.accessdata.fda.gov/scripts/cdrh/cfdocs/cfMAUDE/Detail.CFM?MDRFOI__ID=12250498&pc=QCB	2023826-2021-02951	2021-05-07	Injury	STAAR SURGICAL COMPANY	2021-07-29	QCB	IMPLANTABLE COLLAMER LENS (ICL)	Inadequacy of Device Shape and/or Size	Appropriate Clinical Signs, Symptoms, Conditions Term / Code Not Available	NA	Event Description: THE REPORTER INDICATED THE SURGEON IMPLANTED A 12.6MM VTICMO12.6 IMPLANTABLE COLLAMER LENS, -14.50/+2.0/092 (SPHERE/CYLINDER/AXIS), IN THE PATIENTS LEFT EYE (OS), ON (B)(6) 2021. THE LENS WAS EXPLANTED ON (B)(6) 2021 DUE TO EXCESSIVE VAULTING AND SIGNIFICANT REDUCTION OF IRIDO-CORNEAL ANGLES. THE LENS WAS EXCHANGED FOR A SHORTER LENS AND THE PROBLEM WAS RESOLVED. THE CAUSE OF T…	-14.50/+2.0/092	OS	Physician	06/29/2021	2021	22
https://www.accessdata.fda.gov/scripts/cdrh/cfdocs/cfMAUDE/Detail.CFM?MDRFOI__ID=12271333&pc=QCB	2023826-2021-03014		Injury	STAAR SURGICAL COMPANY	2021-08-03	QCB	IMPLANTABLE COLLAMER LENS (ICL)	Inadequacy of Device Shape and/or Size	Appropriate Clinical Signs, Symptoms, Conditions Term / Code Not Available	NA	Event Description: THE REPORTER INDICATED THE SURGEON IMPLANTED A 13.2MM VTICMO13.2 IMPLANTABLE COLLAMER LENS, -14.50/+1.5/037 (SPHERE/CYLINDER/AXIS), INTO THE PATIENTS RIGHT EYE (OD) ON (B)(6) 2021. THE LENS WAS EXPLANTED DUE TO EXCESSIVE VAULTING AND SIGNIFICANT REDUCTION OF IRIDO-CORNEAL ANGLES. THE LENS WAS EXCHANGED FOR A SHORTER LENS AND THE PROBLEM WAS RESOLVED. THE CAUSE OF THE EVENT WAS …	-14.50/+1.5/037	OD	Physician	06/21/2021	2021
https://www.accessdata.fda.gov/scripts/cdrh/cfdocs/cfMAUDE/Detail.CFM?MDRFOI__ID=12322370&pc=QCB	2023826-2021-03129	2021-07-22 04:00:00	Malfunction	STAAR SURGICAL COMPANY	2021-08-15 04:00:00	QCB	IMPLANTABLE COLLAMER LENS	Inadequacy of Device Shape and/or Size	Appropriate Clinical Signs, Symptoms, Conditions Term / Code Not Available	N/A	Event Description: THE REPORTER STATED THAT THE SURGEON IMPLANTED AN IMPLANTABLE COLLAMER LENS INTO THE PATIENT'S RIGHT EYE (OD). THE SURGEON REPORTS LOW VAULT AT 190UM AND ACCOMMODATION ISSUES. ATTEMPTS TO OBTAIN ADDITIONAL INFORMATION HAVE NOT BEEN SUCCESSFUL. Manufacturer Narrative: B5-ADDITIONAL INFORMATION: A 13.2MM VTICM5_13.2, -12.5/+3.0/117 (SPHERE/CYLINDER/AXIS) ICL WAS IMPLANTED INTO TH…	-12.5/+3.0/117	OD		07/22/2021	2021	37
https://www.accessdata.fda.gov/scripts/cdrh/cfdocs/cfMAUDE/Detail.CFM?MDRFOI__ID=12322374&pc=QCB	2023826-2021-03119	2021-06-16 04:00:00	Injury	STAAR SURGICAL COMPANY	2021-08-15 04:00:00	QCB	IMPLANTABLE COLLAMER LENS (ICL)	Device Dislodged or Dislocated	Appropriate Clinical Signs, Symptoms, Conditions Term / Code Not Available	P030016	Event Description: THE REPORTER INDICATED THAT THE SURGEON IMPLANTED A 13.2MM TMICL13.2 IMPLANTABLE COLLAMER LENS, -9.5/+3.5/094 (SPHERE/CYLINDER/AXIS) INTO THE PATIENT'S LEFT EYE (OS) ON (B)(6) 2021. THE SURGEON REPORTS POSSIBLE LENS ROTATION OR MISALIGNMENT AND THE PATIENT IS NOT SATISFIED WITH VISION. REPORTEDLY, THE LENS REMAINS IMPLANTED. Manufacturer Narrative: H6-INVESTIGATION CODE 4110: L…	-9.5/+3.5/094	OS	Physician	07/22/2021	2021	43	Female
https://www.accessdata.fda.gov/scripts/cdrh/cfdocs/cfMAUDE/Detail.CFM?MDRFOI__ID=12322380&pc=QCB	2023826-2021-03130	2021-07-22 04:00:00	Malfunction	STAAR SURGICAL COMPANY	2021-08-15 04:00:00	QCB	IMPLANTABLE COLLAMER LENS	Inadequacy of Device Shape and/or Size	Appropriate Clinical Signs, Symptoms, Conditions Term / Code Not Available	N/A	Event Description: THE REPORTER STATED THAT THE SURGEON IMPLANTED AN IMPLANTABLE COLLAMER LENS INTO THE PATIENT'S LEFT EYE (OS). THE SURGEON REPORTS LOW VAULT AT 0UM AND ACCOMMODATION ISSUES. ATTEMPTS TO OBTAIN ADDITIONAL INFORMATION HAVE NOT BEEN SUCCESSFUL. Manufacturer Narrative: B5-ADDITIONAL INFORMATION: THE SURGEON IMPLANTED A 13.2MM VTICM5_13.2, -9.5/+4.0/089 (SPHERE/CYLINDER/AXIS) ICL INT…	-9.5/+4.0/089	OS		07/22/2021	2021	37
https://www.accessdata.fda.gov/scripts/cdrh/cfdocs/cfMAUDE/Detail.CFM?MDRFOI__ID=12325335&pc=QCB	2023826-2021-03181	2021-06-16 04:00:00	Injury	STAAR SURGICAL COMPANY	2021-08-16 04:00:00	QCB	IMPLANTABLE COLLAMER LENS (ICL)	Device Dislodged or Dislocated	Appropriate Clinical Signs, Symptoms, Conditions Term / Code Not Available	P030016	Event Description: THE REPORTER INDICATED THAT THE SURGEON IMPLANTED A 13.2MM TMICL13.2 IMPLANTABLE COLLAMER LENS, -10.0/+4.0/086 (SPHERE/CYLINDER/AXIS) INTO THE PATIENT'S RIGHT EYE (OD) ON (B)(6)2021. THE SURGEON REPORTS POSSIBLE LENS ROTATION OR MISALIGNMENT AND THE PATIENT IS NOT SATISFIED WITH VISION. REPORTEDLY, THE LENS REMAINS IMPLANTED. Manufacturer Narrative: H6-INVESTIGATION CODE 4110: …	-10.0/+4.0/086	OD	Physician	07/22/2021	2021	43	Female
https://www.accessdata.fda.gov/scripts/cdrh/cfdocs/cfMAUDE/Detail.CFM?MDRFOI__ID=12411060&pc=QCB	2023826-2021-03403	2021-07-24 04:00:00	Injury	STAAR SURGICAL COMPANY	2021-09-01 04:00:00	QCB	IMPLANTABLE COLLAMER LENS (ICL)	Off-Label Use; Inadequacy of Device Shape and/or Size	Appropriate Clinical Signs, Symptoms, Conditions Term / Code Not Available	NA	Event Description: THE REPORTER INDICATED THE SURGEON IMPLANTED A 12.6MM VTICMO12.6 IMPLANTABLE COLLAMER LENS, -09.50/+1.5/091 (SPHERE/CYLINDER/AXIS), IN THE PATIENTS RIGHT EYE (OD), ON (B)(6) 2021. THE LENS WAS EXPLANTED ON (B)(6) 2021 DUE TO EXCESSIVE VAULTING AND SIGNIFICANT REDUCTION OF IRIDO-CORNEAL ANGLES. THE LENS WAS REPLACED WITH ANOTHER SAME MODEL/LENGTH LENS (THE LENS WAS IMPLANTED IN …	-09.50/+1.5/091	OD	Physician	08/06/2021	2021	19	Male
https://www.accessdata.fda.gov/scripts/cdrh/cfdocs/cfMAUDE/Detail.CFM?MDRFOI__ID=12426112&pc=QCB	2023826-2021-03456	2021-07-30 04:00:00	Malfunction	STAAR SURGICAL COMPANY	2021-09-03 04:00:00	QCB	IMPLANTABLE COLLAMER LENS (ICL)	No Apparent Adverse Event	Appropriate Clinical Signs, Symptoms, Conditions Term / Code Not Available	N/A	Event Description: THE REPORTER INDICATED THAT A 13.2MM VTICMO13.2, -9.5/+0.5/131 (SPHERE/CYLINDER/AXIS) IMPLANTABLE COLLAMER LENS WAS IMPLANTED INTO THE PATIENT'S RIGHT EYE (OD) ON (B)(6) 2021. REPORTEDLY THE PUPIL IS FIXED AND DILATED AND PIGMENTED CELLS ARE PRESENT. THE LENS REMAINS IMPLANTED. THE CAUSE IS REPORTED AS UNKNOWN. Manufacturer Narrative: B5-ADDITIONAL INFORMATION: THE PATIENT CANC…	-9.5/+0.5/131	OD		08/13/2021	2021	33
https://www.accessdata.fda.gov/scripts/cdrh/cfdocs/cfMAUDE/Detail.CFM?MDRFOI__ID=12443368&pc=QCB	2023826-2021-03541	2021-08-05	Injury	STAAR SURGICAL COMPANY	2021-09-08	QCB	IMPLANTABLE COLLAMER LENS (ICL)	Inadequacy of Device Shape and/or Size	Appropriate Clinical Signs, Symptoms, Conditions Term / Code Not Available	P030016	Event Description: THE REPORTER INDICATED THAT A 13.2MM, TMICL13.2, -10.5/1.0/090 (SPHERE/CYLINDER/AXIS), IMPLANTABLE COLLAMER LENS WAS IMPLANTED INTO THE PATIENTS RIGHT EYE (OD) ON (B)(6) 2021. THE LENS WAS LATER EXPLANTED DUE TO EXCESSIVE VAULT. FOR STATUS OF THE EYE (SIGNS/SYMPTOMS):" HAPPY WITH VISION. SHALLOW AC, VERY HIGH VAULT AND NARROW ANGLES" WAS REPORTED. IT WAS ALSO REPORTED THAT THIS…	-10.5/1.0/090	OD	Physician	08/13/2021	2021	32
https://www.accessdata.fda.gov/scripts/cdrh/cfdocs/cfMAUDE/Detail.CFM?MDRFOI__ID=12443370&pc=QCB	2023826-2021-03542	2021-08-05 04:00:00	Injury	STAAR SURGICAL COMPANY	2021-09-08 04:00:00	QCB	IMPLANTABLE COLLAMER LENS (ICL)	Inadequacy of Device Shape and/or Size	Appropriate Clinical Signs, Symptoms, Conditions Term / Code Not Available	P030016	Event Description: THE REPORTER INDICATED THAT A 13.2MM, TMICL13.2, -11.0/1.5/091 (SPHERE/CYLINDER/AXIS), IMPLANTABLE COLLAMER LENS WAS IMPLANTED INTO THE PATIENTS LEFT EYE (OS) ON (B)(6) 2021. THE LENS WAS LATER EXPLANTED DUE TO EXCESSIVE VAULT. FOR STATUS OF THE EYE (SIGNS/SYMPTOMS):" HAPPY WITH VISION. SHALLOW AC, VERY HIGH VAULT AND NARROW ANGLES" WAS REPORTED. IT WAS ALSO REPORTED THAT THIS …	-11.0/1.5/091	OS	Physician	08/13/2021	2021	32	Female
https://www.accessdata.fda.gov/scripts/cdrh/cfdocs/cfMAUDE/Detail.CFM?MDRFOI__ID=12454497&pc=QCB	2023826-2021-03487	2021-08-10 04:00:00	Injury	STAAR SURGICAL COMPANY	2021-09-10 04:00:00	QCB	IMPLANTABLE COLLAMER LENS (ICL)	Inadequacy of Device Shape and/or Size	Appropriate Clinical Signs, Symptoms, Conditions Term / Code Not Available	NA	Event Description: THE REPORTER INDICATED THE SURGEON IMPLANTED A 13.2MM VTICM5_13.2 IMPLANTABLE COLLAMER LENS, -07.50/+0.5/019 (SPHERE/CYLINDER/AXIS) INTO THE PATIENTS RIGHT EYE (OD) ON (B)(6) 2018. THE LENS WAS REPORTED AS LOW VAULTING AND REFRACTIVE CHANGE OVERTIME. THE LENS REMAINED IMPLANTED. THE CAUSE OF THE EVENT WAS UNKNOWN. ADDITIONAL INFORMATION HAS BEEN REQUESTED BUT NONE HAS BEEN FORT…	-07.50/+0.5/019	OD	Physician	08/12/2021	2021	31	Male
https://www.accessdata.fda.gov/scripts/cdrh/cfdocs/cfMAUDE/Detail.CFM?MDRFOI__ID=12454516&pc=QCB	2023826-2021-03486	2021-08-10 04:00:00	Injury	STAAR SURGICAL COMPANY	2021-09-10 04:00:00	QCB	IMPLANTABLE COLLAMER LENS (ICL)	Inadequacy of Device Shape and/or Size; Adverse Event Without Identified Device or Use Problem	Appropriate Clinical Signs, Symptoms, Conditions Term / Code Not Available	NA	Event Description: THE REPORTER INDICATED THE SURGEON IMPLANTED A 13.2MM VTICMO13.2 IMPLANTABLE COLLAMER LENS, -11.50/+0.5/066 (SPHERE/CYLINDER/AXIS) INTO THE PATIENTS LEFT EYE (OS) ON (B)(6) 2014. THE LENS WAS REPORTED AS LOW VAULTING AND REFRACTIVE CHANGE OVERTIME THE LENS REMAINED IMPLANTED. THE CAUSE OF THE EVENT WAS UNKNOWN. ADDITIONAL INFORMATION HAS BEEN REQUESTED BUT NONE HAS BEEN FORTHCO…	-11.50/+0.5/066	OS	Physician	08/12/2021	2021	35	Female
https://www.accessdata.fda.gov/scripts/cdrh/cfdocs/cfMAUDE/Detail.CFM?MDRFOI__ID=12479163&pc=QCB	2023826-2021-03594	2021-05-01	Malfunction	STAAR SURGICAL COMPANY	2021-09-16	QCB	IMPLANTABLE COLLAMER LENS (ICL)	Adverse Event Without Identified Device or Use Problem	Appropriate Clinical Signs, Symptoms, Conditions Term / Code Not Available	NA	Event Description: THE REPORTER INDICATED THAT A 13.2MM, VTICM5_13.2, -12.00/5.0/109 (SPHERE/CYLINDER/AXIS), IMPLANTABLE COLLAMER LENS WAS IMPLANTED INTO THE PATIENTS RIGHT EYE (OD). VERY SHALLOW ANTERIOR CHAMBER WAS OBSERVED. LENS REMAINS IMPLANTED. CAUSE OF EVENT IS UNKNOWN. Manufacturer Narrative: THIS PRODUCT IS NOT MARKETED IN THE US. IMPLANT DATE: UNK. (B)(4). CLAIM # (B)(4).	-12.00/5.0/109	OD	Physician	08/19/2021	2021	28
https://www.accessdata.fda.gov/scripts/cdrh/cfdocs/cfMAUDE/Detail.CFM?MDRFOI__ID=12559075&pc=QCB	2023826-2021-03832		Malfunction	STAAR SURGICAL COMPANY	2021-10-01 04:00:00	QCB	IMPLANTABLE COLLAMER LENS (ICL)	Adverse Event Without Identified Device or Use Problem	Appropriate Clinical Signs, Symptoms, Conditions Term / Code Not Available	P030016	Event Description: THE REPORTER INDICATED THAT A 12.6MM, TMICL12.6, -6.5/2.5/90, IMPLANTABLE COLLAMER LENS WAS IMPLANTED INTO THE PATIENTS RIGHT EYE (OD) ON (B)(6) 2021 AS A REPLACEMENT LENS TO CORRECT EXCESSIVE VAULT AND ANGLE CLOSURE WITH IOP. FOR STATUS OF THE EYE (SIGNS/ SYMPTOMS): THE REPORTER STATED "2+ CELL, FORMED AC, LENS EDGE VISIBLE SUP AND INF. ANGLE NARROW AT NASAL & TEMP. OPEN BUT S…	-6.5/2.5/90	OD	Physician	08/31/2021	2021		Female
https://www.accessdata.fda.gov/scripts/cdrh/cfdocs/cfMAUDE/Detail.CFM?MDRFOI__ID=12573699&pc=QCB	2023826-2021-03859	2021-09-03 04:00:00	Injury	STAAR SURGICAL COMPANY	2021-10-04 04:00:00	QCB	IMPLANTABLE COLLAMER LENS (ICL)	Inadequacy of Device Shape and/or Size; Device Dislodged or Dislocated	Appropriate Clinical Signs, Symptoms, Conditions Term / Code Not Available	NA	Event Description: THE REPORTER INDICATED THE SURGEON IMPLANTED A 13.2MM VTICM5_13.2 IMPLANTABLE COLLAMER LENS, -09.00/+4.0/107 (SPHERE/CYLINDER/AXIS), IN THE PATIENTS LEFT EYE (OS), ON (B)(6) 2021. THE LENS WAS REPORTED AS LOW VAULTING WITH LENS ROTATION. THE REPORTER INDICATED THE SURGERY WAS PERFORMED WITH SOME TRAUMATISM DUE TO IRIS PROLAPSED INTO BOTH PARACENTESIS DURING SURGERY. THE LENS RE…	-09.00/+4.0/107	OS	Physician	09/06/2021	2021	27	Female
https://www.accessdata.fda.gov/scripts/cdrh/cfdocs/cfMAUDE/Detail.CFM?MDRFOI__ID=12587055&pc=QCB	2023826-2021-03866	2021-09-08	Malfunction	STAAR SURGICAL COMPANY	2021-10-06	QCB	IMPLANTABLE COLLAMER LENS (ICL)	Inadequacy of Device Shape and/or Size	Appropriate Clinical Signs, Symptoms, Conditions Term / Code Not Available	NA	Event Description: THE REPORTER INDICATED THE SURGEON IMPLANTED A 13.7MM VTICM5_13.7 IMPLANTABLE COLLAMER LENS, -11.50/+0.5/105 (SPHERE/CYLINDER/AXIS), IN THE PATIENTS LEFT EYE (OS) ON (B)(6) 2021. THE LENS WAS REPORTED AS EXCESSIVE VAULTING AND SIGNIFICANT REDUCTION OF IRIDO-CORNEAL ANGLES. THE LENS REMAINED IMPLANTED. THE CAUSE OF THE EVENT WAS UNKNOWN. Manufacturer Narrative: WEIGHT: UNK. ETHN…	-11.50/+0.5/105	OS	Physician	09/10/2021	2021	32
https://www.accessdata.fda.gov/scripts/cdrh/cfdocs/cfMAUDE/Detail.CFM?MDRFOI__ID=12637120&pc=QCB	2023826-2021-03958	2021-07-03	Injury	STAAR SURGICAL COMPANY	2021-10-14	QCB	IMPLANTABLE COLLAMER LENS (ICL)	Off-Label Use; Adverse Event Without Identified Device or Use Problem	Appropriate Clinical Signs, Symptoms, Conditions Term / Code Not Available	NA	Event Description: THE REPORTER INDICATED THAT THE SURGEON IMPLANTED A 12.6MM VTICMO12.6 IMPLANTABLE COLLAMER LENS, -13.5/+2.0/073 (SPHERE/CYLINDER/AXIS) INTO THE PATIENT'S LEFT EYE (OS) ON (B)(6) 2021. ON (B)(6) 2021 THE LENS WAS EXCHANGED WITH A SAME LENGTH DIFFERENT AXIS LENS DUE TO THE EXPECTED VISION NOT BEING ACHEIVED. THE PROBLEM WAS NOT RESOLVED. THE CAUSE OF THE EVENT IS REPORTED AS UNKN…	-13.5/+2.0/073	OS	Physician	09/24/2021	2021	30
https://www.accessdata.fda.gov/scripts/cdrh/cfdocs/cfMAUDE/Detail.CFM?MDRFOI__ID=12677849&pc=QCB	2023826-2021-04047	2021-09-01	Malfunction	STAAR SURGICAL COMPANY	2021-10-21	QCB	IMPLANTABLE COLLAMER LENS (ICL)	No Apparent Adverse Event	Appropriate Clinical Signs, Symptoms, Conditions Term / Code Not Available	NA	Event Description: THE REPORTER INDICATED THE SURGEON IMPLANTED A 12.6MM VTICM5_12.6 IMPLANTABLE COLLAMER LENS, -06.00/+1.5/094 (SPHERE/CYLINDER/AXIS), IN THE PATIENTS LEFT EYE (OS) ON (B)(6) 2021. THE PATIENT REPORTED POST-OP COLOR DISTORTION, MAINLY IN BLUE TONES. THE LENS REMAINED IMPLANTED. THE CAUSE OF THE EVENT WAS UNKNOWN. ADDITIONAL INFORMATION HAS BEEN REQUESTED BUT NONE HAS BEEN FORTHCO…	-06.00/+1.5/094	OS	Physician	09/28/2021	2021	40
https://www.accessdata.fda.gov/scripts/cdrh/cfdocs/cfMAUDE/Detail.CFM?MDRFOI__ID=12677861&pc=QCB	2023826-2021-04045		Malfunction	STAAR SURGICAL COMPANY	2021-10-21	QCB	IMPLANTABLE COLLAMER LENS (ICL)	No Apparent Adverse Event	Appropriate Clinical Signs, Symptoms, Conditions Term / Code Not Available	NA	Event Description: THE REPORTER INDICATED THE SURGEON IMPLANTED A 13.2MM VTICM5_13.2 IMPLANTABLE COLLAMER LENS, -10.50/+0.5/073 (SPHERE/CYLINDER/AXIS), IN THE PATIENTS LEFT EYE (OS). THREE MONTHS AFTER SURGERY, THE PATIENT REPORTED DYSPHOTOPSIAS AT NIGHT. THE LENS REMAINED IMPLANTED. ADDITIONAL INFORMATION HAS BEEN REQUESTED BUT NONE HAS BEEN FORTHCOMING. Manufacturer Narrative: PT INFO: UNK. IMP…	-10.50/+0.5/073	OS	Physician	09/29/2021	2021
https://www.accessdata.fda.gov/scripts/cdrh/cfdocs/cfMAUDE/Detail.CFM?MDRFOI__ID=12685424&pc=QCB	2023826-2021-04076	2021-07-23	Injury	STAAR SURGICAL COMPANY	2021-10-22	QCB	IMPLANTABLE COLLAMER LENS (ICL)	Inadequacy of Device Shape and/or Size	Appropriate Clinical Signs, Symptoms, Conditions Term / Code Not Available	NA	Event Description: THE REPORTER INDICATED THAT THE SURGEON IMPLANTED A 13.2MM VTICMO13.2 IMPLANTABLE COLLAMER LENS, -11.0/+1.5/093 (SPHERE/CYLINDER/AXIS) INTO THE PATIENT'S LEFT EYE (OS) ON (B)(6) 2021. ON (B)(6) 2021 THE LENS WAS EXCHANGED WITH A SHORTER LENS DUE TO EXCESSIVE VAULT AND SIGNIFICANT REDUCTION OF IRIDO-CORNEAL ANGLES (ICA). THE PROBLEM WAS RESOLVED. THE CAUSE OF THE EVENT IS REPORT…	-11.0/+1.5/093	OS	Physician	09/29/2021	2021	32
https://www.accessdata.fda.gov/scripts/cdrh/cfdocs/cfMAUDE/Detail.CFM?MDRFOI__ID=12749423&pc=QCB	2023826-2021-04226	2021-07-13	Injury	STAAR SURGICAL COMPANY	2021-11-03	QCB	IMPLANTABLE COLLAMER LENS (ICL)	Inadequacy of Device Shape and/or Size	Appropriate Clinical Signs, Symptoms, Conditions Term / Code Not Available	NA	Event Description: THE REPORTER INDICATED THAT A 12.6MM, VTICM5_12.6,-9.00/1.0/091, IMPLANTABLE COLLAMER LENS WAS IMPLANTED INTO THE PATIENTS RIGHT EYE (OD) ON (B)(6) 2020. ON (B)(6) 2021 THE LENS WAS EXCHANGED FOR A SHORTER LENGTH LENS DUE TO EXCESSIVE VAULT,SIGNIFICANT REDUCTION OF IRIDO-CORNEAL ANGLES AND PIGMENT DISPERSION. THIS EXCHANGE RESOLVED THE PROBLEM. CAUSE OF EVENT WAS UNKNOWN. Manuf…	-9.00/1.0/091	OD	Physician	10/04/2021	2021	33
https://www.accessdata.fda.gov/scripts/cdrh/cfdocs/cfMAUDE/Detail.CFM?MDRFOI__ID=12807721&pc=QCB	2023826-2021-04270	2021-09-04 04:00:00	Injury	STAAR SURGICAL COMPANY	2021-11-12 05:00:00	QCB	IMPLANTABLE COLLAMER LENS (ICL)	Inadequacy of Device Shape and/or Size	Appropriate Clinical Signs, Symptoms, Conditions Term / Code Not Available	N/A	Event Description: THE REPORTER INDICATED THAT A 13.2MM VTICM5_13.2, -12.5/+2.5/089 (SPHERE/CYLINDER/AXIS) IMPLANTABLE COLLAMER LENS WAS IMPLANTED INTO THE PATIENT'S RIGHT EYE (OD) ON (B)(6) 2021. ON (B)(6) 2021 THE LENS WAS EXCHANGED WITH A SHORTER LENS DUE TO EXCESSIVE VAULT AND SIGNIFICANT REDUCTION OF IRIDO-CORNEAL ANGLES (ICA). THE PROBLEM WAS RESOLVED. THE CAUSE OF THE EVENT IS REPORTED AS …	-12.5/+2.5/089	OD	Physician	10/22/2021	2021	23	Male
https://www.accessdata.fda.gov/scripts/cdrh/cfdocs/cfMAUDE/Detail.CFM?MDRFOI__ID=12833482&pc=QCB	2023826-2021-04291	2021-09-16 04:00:00	Injury	STAAR SURGICAL COMPANY	2021-11-17 05:00:00	QCB	IMPLANTABLE COLLAMER LENS (ICL)	Misfocusing; Device Dislodged or Dislocated	Appropriate Clinical Signs, Symptoms, Conditions Term / Code Not Available	NA	Event Description: THE REPORTER INDICATED THE SURGEON IMPLANTED A 13.2MM VTICMO13.2 IMPLANTABLE COLLAMER LENS, -08.00/+3.5/087 (SPHERE/CYLINDER/AXIS), IN THE PATIENTS RIGHT EYE (OD), ON (B)(6) 2021. THE LENS WAS EXPLANTED ON (B)(6) 2021 DUE TO LENS ROTATION NOT ASSOCIATED TO A LOW VAULT, REFRACTIVE SURPRISE AND REFRACTIVE CHANGE OVERTIME. THE LENS WAS REPOSITIONED BUT THE PROBLEM WAS NOT RESOLVED…	-08.00/+3.5/087	OD	Physician	10/19/2021	2021	28	Female
https://www.accessdata.fda.gov/scripts/cdrh/cfdocs/cfMAUDE/Detail.CFM?MDRFOI__ID=12840550&pc=QCB	2023826-2021-04355	2021-03-31 04:00:00	Injury	STAAR SURGICAL COMPANY	2021-11-18 05:00:00	QCB	IMPLANTABLE COLLAMER LENS (ICL)	Inadequacy of Device Shape and/or Size	Appropriate Clinical Signs, Symptoms, Conditions Term / Code Not Available	NA	Event Description: THE REPORTER INDICATED THE SURGEON IMPLANTED A 13.2MM VTICMO13.2 IMPLANTABLE COLLAMER LENS, -07.00/+4.5/103 (SPHERE/CYLINDER/AXIS) IN THE PATIENTS RIGHT EYE (OD), ON (B)(6) 2021. THE LENS WAS EXPLANTED ON (B)(6) 2021 DUE TO EXCESSIVE VAULTING AND SIGNIFICANT REDUCTION OF IRIDO-CORNEAL ANGLES. THE LENS WAS REPLACED WITH A SHORTER LENS AND THE PROBLEM WAS RESOLVED. THE AC IS DEEP…	-07.00/+4.5/103	OD	Physician	10/22/2021	2021	22	Male
https://www.accessdata.fda.gov/scripts/cdrh/cfdocs/cfMAUDE/Detail.CFM?MDRFOI__ID=12840570&pc=QCB	2023826-2021-04365	2021-11-16 05:00:00	Injury	STAAR SURGICAL COMPANY	2021-11-18 05:00:00	QCB	IMPLANTABLE COLLAMER LENS (ICL)	Patient-Device Incompatibility; No Apparent Adverse Event	Appropriate Clinical Signs, Symptoms, Conditions Term / Code Not Available	P030016	Event Description: THE REPORTER INDICATED THAT THE SURGEON IMPLANTED A 12.6MM TMICL12.6 IMPLANTABLE COLLAMER LENS, -5.0/+1.0/090 (SPHERE/CYLINDER/AXIS) INTO THE PATIENTS LEFT EYE (OS) ON (B)(6) 2021. THE SURGEON REPORTS PIGMENT DISPERSION SYNDROME. Manufacturer Narrative: B5-ADDITIONAL INFORMATION: ON 16-NOV-2021 THE LENS WAS EXPLANTED. THE SURGEON STATES AFTER EXPLANT-"NORMAL POSTOP. WAITING FOR…	-5.0/+1.0/090	OS	Physician	10/26/2021	2021	23	Female
https://www.accessdata.fda.gov/scripts/cdrh/cfdocs/cfMAUDE/Detail.CFM?MDRFOI__ID=12840589&pc=QCB	2023826-2021-04364	2021-11-16 05:00:00	Injury	STAAR SURGICAL COMPANY	2021-11-18 05:00:00	QCB	IMPLANTABLE COLLAMER LENS (ICL)	Patient-Device Incompatibility; No Apparent Adverse Event	Appropriate Clinical Signs, Symptoms, Conditions Term / Code Not Available	P030016	Event Description: THE REPORTER INDICATED THAT THE SURGEON IMPLANTED A 12.6MM TMICL12.6 IMPLANTABLE COLLAMER LENS, -5.5/+1.5/088 (SPHERE/CYLINDER/AXIS) INTO THE PATIENTS RIGHT EYE (OD) ON (B)(6) 2021. THE SURGEON REPORTS PIGMENT DISPERSION SYNDROME. Manufacturer Narrative: B5: ADDITIONAL INFORMATION: REPORTEDLY ON (B)(6) 2021 THE LENS WAS REPOSITIONED. ON (B)(6) 2021 THE LENS WAS EXPLANTED. THE S…	-5.5/+1.5/088	OD	Physician	10/26/2021	2021	23	Female
https://www.accessdata.fda.gov/scripts/cdrh/cfdocs/cfMAUDE/Detail.CFM?MDRFOI__ID=12965261&pc=QCB	2023826-2021-04649	2021-10-25 04:00:00	Injury	STAAR SURGICAL COMPANY	2021-12-08 05:00:00	QCB	IMPLANTABLE COLLAMER LENS (ICL)	Inadequacy of Device Shape and/or Size	Appropriate Clinical Signs, Symptoms, Conditions Term / Code Not Available	NA	Event Description: THE REPORTER INDICATED THE SURGEON IMPLANTED A 13.2MM VTICM5_13.2 IMPLANTABLE COLLAMER LENS, -07.00/+1.0/102 (SPHERE/ CYLINDER/ AXIS) INTO THE PATIENTS RIGHT EYE (OD) ON (B)(6) 2020. LOW VAULTING AND REFRACTIVE CHANGE OVER TIME WAS REPORTED. THE LENS REMAINED IMPLANTED. ADDITIONAL INFORMATION HAS BEEN REQUESTED BUT NONE HAS BEEN FORTHCOMING. Manufacturer Narrative: B5: THE LENS…	-07.00/+1.0/102	OD	Physician	11/10/2021	2021	31	Female
https://www.accessdata.fda.gov/scripts/cdrh/cfdocs/cfMAUDE/Detail.CFM?MDRFOI__ID=12965369&pc=QCB	2023826-2021-04651		Malfunction	STAAR SURGICAL COMPANY	2021-12-08 05:00:00	QCB	IMPLANTABLE COLLAMER LENS (ICL)	No Apparent Adverse Event	Appropriate Clinical Signs, Symptoms, Conditions Term / Code Not Available	NA	Event Description: THE REPORTER INDICATED THE SURGEON IMPLANTED A 13.2MM VTICMO13.2 IMPLANTABLE COLLAMER LENS, -15.50/+1.5/074 (SPHERE/ CYLINDER/ AXIS), IN THE PATIENTS RIGHT EYE (OD) ON (B)(6) 2021. THE PATIENT COMPLAINED THEIR VISION WAS WORSE. THE VAULT WAS IMPROVED, ANGLE BETTER AND IOP STABLE. THE SURGEON ASKED PATIENT TO ADAPT TO THEIR NEW VISION. THIS WAS THE REPLACEMENT LENS FOR MFR. REPO…	-15.50/+1.5/074	OD	Physician	11/10/2021	2021		Male
https://www.accessdata.fda.gov/scripts/cdrh/cfdocs/cfMAUDE/Detail.CFM?MDRFOI__ID=12972971&pc=QCB	2023826-2021-04650	2021-10-25 04:00:00	Injury	STAAR SURGICAL COMPANY	2021-12-09 05:00:00	QCB	IMPLANTABLE COLLAMER LENS (ICL)	Inadequacy of Device Shape and/or Size	Appropriate Clinical Signs, Symptoms, Conditions Term / Code Not Available	NA	Event Description: THE REPORTER INDICATED THE SURGEON IMPLANTED A 13.2MM VTICM5_13.2 IMPLANTABLE COLLAMER LENS, -06.00/+0.5/086 (SPHERE/CYLINDER/AXIS) INTO THE PATIENTS LEFT EYE (OS) ON (B)(6) 2020. LOW VAULTING AND REFRACTIVE CHANGE OVER TIME WAS REPORTED. THE LENS REMAINED IMPLANTED. ADDITIONAL INFORMATION HAS BEEN REQUESTED BUT NONE HAS BEEN FORTHCOMING. Manufacturer Narrative: THIS PRODUCT IS…	-06.00/+0.5/086	OS	Physician	11/10/2021	2021	31	Female
https://www.accessdata.fda.gov/scripts/cdrh/cfdocs/cfMAUDE/Detail.CFM?MDRFOI__ID=12973335&pc=QCB	2023826-2021-04712	2021-10-11 04:00:00	Injury	STAAR SURGICAL COMPANY	2021-12-09 05:00:00	QCB	IMPLANTABLE COLLAMER LENS (ICL)	Inadequacy of Device Shape and/or Size	Appropriate Clinical Signs, Symptoms, Conditions Term / Code Not Available	NA	Event Description: THE REPORTER INDICATED THAT THE SURGEON IMPLANTED A 13.2MM VTICMO13.2 IMPLANTABLE COLLAMER LENS, -7.0/+1.5/109 (SPHERE/CYLINDER/AXIS) INTO THE PATIENT'S RIGHT EYE (OD) ON (B)(6) 2021. ON (B)(6) 2021 THE LENS WAS EXCHANGED WITH A SHORTER LENS DUE TO EXCESSIVE VAULT AND PIGMENT DISPERSION. THE PROBLEM IS RESOLVED. THE CAUSE OF THE EVENT IS REPORTED AS OTHER: "UNKNOWN REASON FOR H…	-7.0/+1.5/109	OD	Physician	09/29/2021	2021	24	Female
https://www.accessdata.fda.gov/scripts/cdrh/cfdocs/cfMAUDE/Detail.CFM?MDRFOI__ID=12973343&pc=QCB	2023826-2021-04713		Malfunction	STAAR SURGICAL COMPANY	2021-12-09 05:00:00	QCB	IMPLANTABLE COLLAMER LENS (ICL)	Device Dislodged or Dislocated	Appropriate Clinical Signs, Symptoms, Conditions Term / Code Not Available	N/A	Event Description: THE REPORTER INDICATED THE SURGEON IMPLANTED A 13.2MM VTICM5_13.2 IMPLANTABLE COLLAMER LENS, -2.0/+3.0/018 (SPHERE/ CYLINDER/ AXIS) INTO THE PATIENT'S RIGHT EYE (OD) ON (B)(6) 2021. THE SURGEON REPORTS LENS ROTATION AND OVER-REFRACTION OF +0.25/-1.75-144. THE CAUSE OF THE EVENT IS REPORTED AS UNKNOWN. Manufacturer Narrative: THIS PRODUCT IS MANUFACTURED IN THE U.S. BUT NOT MARK…	-2.0/+3.0/018	OD	Physician	11/15/2021	2021		Male
https://www.accessdata.fda.gov/scripts/cdrh/cfdocs/cfMAUDE/Detail.CFM?MDRFOI__ID=13023218&pc=QCB	2023826-2021-04890	2021-11-03 04:00:00	Malfunction	STAAR SURGICAL COMPANY	2021-12-16 05:00:00	QCB	IMPLANTABLE COLLAMER LENS (ICL)	Inadequacy of Device Shape and/or Size	Appropriate Clinical Signs, Symptoms, Conditions Term / Code Not Available	NA	Event Description: THE REPORTER INDICATED THAT THE SURGEON IMPLANTED A 13.2MM VTICMO13.2 IMPLANTABLE COLLAMER LENS, -10.0/+2.0/085 (SPHERE/CYLINDER/AXIS) INTO THE PATIENT'S LEFT EYE (OS) ON (B)(6) 2021. THE SURGEON REPORTS EXCESSIVE VAULT AND SIGNIFICANT REDUCTION OF IRIDO-CORNEAL ANGLES (ICA). REPORTEDLY, THE LENS REMAINS IMPLANTED. Manufacturer Narrative: THIS PRODUCT IS MANUFACTURED IN THE U.S…	-10.0/+2.0/085	OS	Physician	11/19/2021	2021	29	Male
https://www.accessdata.fda.gov/scripts/cdrh/cfdocs/cfMAUDE/Detail.CFM?MDRFOI__ID=13057227&pc=QCB	2023826-2021-04910	2021-06-25 04:00:00	Injury	STAAR SURGICAL COMPANY	2021-12-21 05:00:00	QCB	IMPLANTABLE COLLAMER LENS (ICL)	Adverse Event Without Identified Device or Use Problem	Appropriate Clinical Signs, Symptoms, Conditions Term / Code Not Available	NA	Event Description: THE REPORTER INDICATED THE SURGEON IMPLANTED A 12.6MM VTICMO12.6 IMPLANTABLE COLLAMER LENS, -03.50/+0.5/014 (SPHERE/CYLINDER/AXIS), IN THE PATIENTS LEFT EYE (OS), ON (B)(6) 2021. THE LENS WAS EXPLANTED ON (B)(6) 2021 DUE TO REFRACTIVE CHANGE OVERTIME WAS OBSERVED. THE LENS WAS REPLACED WITH A LONGER LENS (THE LENS WAS IMPLANTED VERTICALLY) AND THE PROBLEM WAS RESOLVED. THE CAUS…	-03.50/+0.5/014	OS	Physician	11/24/2021	2021	38	Female
https://www.accessdata.fda.gov/scripts/cdrh/cfdocs/cfMAUDE/Detail.CFM?MDRFOI__ID=13082442&pc=QCB	2023826-2021-04977	2021-06-21 04:00:00	Injury	STAAR SURGICAL COMPANY	2021-12-23 05:00:00	QCB	IMPLANTABLE COLLAMER LENS (ICL)	Inadequacy of Device Shape and/or Size	Appropriate Clinical Signs, Symptoms, Conditions Term / Code Not Available	N/A	Event Description: THE REPORTER INDICATED THAT A 12.6MM VTICM5_12.6, -3.0/+4.5/093 (SPHERE/CYLINDER/AXIS) IMPLANTABLE COLLAMER LENS WAS IMPLANTED INTO THE PATIENT'S RIGHT EYE (OD) ON (B)(6) 2021. ON (B)(6) 2021, THE LENS WAS EXPLANTED AND THEN REPLACED WITH A SHORTER LENS, THE SURGEON REPORTING A VAULT VALUE OF 1288UM, SIGNIFICANT REDUCTION OF IRIDO-CORNEAL ANGLES (ICA), AND PAS. THE VAULT VALUE …	-3.0/+4.5/093	OD	Physician	12/03/2021	2021	35	Female
https://www.accessdata.fda.gov/scripts/cdrh/cfdocs/cfMAUDE/Detail.CFM?MDRFOI__ID=13082444&pc=QCB	2023826-2021-04978	2021-06-21 04:00:00	Injury	STAAR SURGICAL COMPANY	2021-12-23 05:00:00	QCB	IMPLANTABLE COLLAMER LENS (ICL)	Inadequacy of Device Shape and/or Size	Appropriate Clinical Signs, Symptoms, Conditions Term / Code Not Available	N/A	Event Description: THE REPORTER INDICATED THAT A 12.6MM VTICM5_12.6, -3.0/+4.5/088 (SPHERE/CYLINDER/AXIS) IMPLANTABLE COLLAMER LENS WAS IMPLANTED INTO THE PATIENT'S LEFT EYE (OS) ON (B)(6) 2021. ON (B)(6) 2021 THE LENS WAS EXPLANTED AND THEN REPLACED WITH A SHORTER LENS, THE SURGEON REPORTING EXCESSIVE VAULT, SIGNIFICANT REDUCTION OF IRIDO-CORNEAL ANGLES (ICA), AND PAS. THE PROBLEM IS RESOLVED. M…	-3.0/+4.5/088	OS	Physician	12/03/2021	2021	35	Female
https://www.accessdata.fda.gov/scripts/cdrh/cfdocs/cfMAUDE/Detail.CFM?MDRFOI__ID=13082451&pc=QCB	2023826-2021-04979		Injury	STAAR SURGICAL COMPANY	2021-12-23 05:00:00	QCB	IMPLANTABLE COLLAMER LENS	Off-Label Use; Adverse Event Without Identified Device or Use Problem; No Apparent Adverse Event	Appropriate Clinical Signs, Symptoms, Conditions Term / Code Not Available	NA	Event Description: THE REPORTER INDICATED THAT A 12.6MM VTICM5_12.6 IMPLANTABLE COLLAMER LENS, -11.0/+4.0/091 (SPHERE/CYLINDER/AXIS) WAS IMPLANTED INTO THE LEFT (OS) EYE ON (B)(6) 2021. REPORTEDLY THE MAIN INCISION NEEDED TO BE SUTURED DUE TO "MANEUVER AND CAUSES WOUND LEAK."Event Description: THE REPORTER INDICATED THAT A 12.6MM VTICM5_12.6 IMPLANTABLE COLLAMER LENS, -11.0/+4.0/091 (SPHERE/CYLIN…	-11.0/+4.0/091	OS	Physician	11/26/2021	2021		Male
https://www.accessdata.fda.gov/scripts/cdrh/cfdocs/cfMAUDE/Detail.CFM?MDRFOI__ID=13090715&pc=QCB	2023826-2021-04996	2021-01-13 05:00:00	Injury	STAAR SURGICAL COMPANY	2021-12-27 05:00:00	QCB	IMPLANTABLE COLLAMER LENS (ICL)	No Apparent Adverse Event	Appropriate Clinical Signs, Symptoms, Conditions Term / Code Not Available		Event Description: THE REPORTER INDICATED THAT THE SURGEON IMPLANTED A 13.2MM TMICL13.2; -9.5/1.0/081 (SPHERE/CYLINDER/AXIS) IMPLANTABLE COLLAMER LENS INTO THE PATIENT'S LEFT EYE (OS) ON (B)(6) 2021. ON (B)(6) 2021, THE LENS WAS EXPLANTED DUE TO THE PATIENT EXPERIENCED FOREIGN BODY SENSATION. THE PROBLEM WAS RESOLVED. THE CAUSE OF THE EVENT WAS REPORTED AS UNKNOWN; BUT NOTED THE DEVICE DID NOT FA…	-9.5/1.0/081	OS	Other Health Care Professional	12/14/2021	2021	31	Male
https://www.accessdata.fda.gov/scripts/cdrh/cfdocs/cfMAUDE/Detail.CFM?MDRFOI__ID=13102113&pc=QCB	2023826-2021-05012	2021-11-24 05:00:00	Injury	STAAR SURGICAL COMPANY	2021-12-28 05:00:00	QCB	IMPLANTABLE COLLAMER LENS (ICL)	Inadequacy of Device Shape and/or Size	Appropriate Clinical Signs, Symptoms, Conditions Term / Code Not Available		Event Description: THE REPORTER INDICATED THAT THE SURGEON IMPLANTED A 13.2MM VTICM5_13.2; -0.50/+5.5/82 (SPHERE/CYLINDER/AXIS) IMPLANTABLE COLLAMER LENS INTO THE PATIENT'S RIGHT EYE (OD) ON (B)(6) 2021. ON (B)(6) 2021 THE LENS WAS EXCHANGED WITH A SHORTER LENGTH LENS DUE TO EXCESSIVE VAULTING AND SIGNIFICANT REDUCTION OF IRIDO-CORNEAL ANGLES. THIS RESOLVED THE PROBLEM. THE CAUSE OF THE EVENT WAS…	-0.50/+5.5/82	OD	Physician	12/21/2021	2021	24	Female
https://www.accessdata.fda.gov/scripts/cdrh/cfdocs/cfMAUDE/Detail.CFM?MDRFOI__ID=13122737&pc=QCB	2023826-2021-05009	2021-10-02 04:00:00	Injury	STAAR SURGICAL COMPANY	2021-12-30 05:00:00	QCB	IMPLANTABLE COLLAMER LENS (ICL)	Inadequacy of Device Shape and/or Size; Device Dislodged or Dislocated	Appropriate Clinical Signs, Symptoms, Conditions Term / Code Not Available	N/A	Event Description: THE REPORTER INDICATED THE SURGEON IMPLANTED A 13.2MM VTICM5_13.2 IMPLANTABLE COLLAMER LENS, -10.5/+1.0/088 (SPHERE/CYLINDER/AXIS) INTO THE PATIENT'S LEFT EYE (OS) ON (B)(6) 2020. ON (B)(6) 2021 THE LENS WAS EXPLANTED AND THEN REPLACED WITH A LONGER LENS DUE TO LOW VAULT AND LENS ROTATION. THE PROBLEM WAS RESOLVED. THE CAUSE OF THE EVENT IS REPORTED AS UNKNOWN: "LENS TOO SMALL …	-10.5/+1.0/088	OS	Physician	12/09/2021	2021	30	Male
https://www.accessdata.fda.gov/scripts/cdrh/cfdocs/cfMAUDE/Detail.CFM?MDRFOI__ID=13122997&pc=QCB	2023826-2021-04782	2021-07-27 04:00:00	Injury	STAAR SURGICAL COMPANY	2021-12-30 05:00:00	QCB	IMPLANTABLE COLLAMER LENS (ICL)	Inadequacy of Device Shape and/or Size	Appropriate Clinical Signs, Symptoms, Conditions Term / Code Not Available	NA	Event Description: THE REPORTER INDICATED THAT A 13.2MM VTICM5 13.2 IMPLANTABLE COLLAMER LENS OF -8.5/0.5/006 (SPHERE/CYLINDER/AXIS) WAS IMPLANTED INTO THE PATIENTS RIGHT EYE (OD) ON (B)(6) 2021. ON (B)(6) 2021 THE LENS WAS EXCHANGED FOR A SHORTER LENGTH LENS DUE TO EXCESSIVE VAULT AND SIGNIFICANT REDUCTION OF IRIDOCORNEAL ANGLES. THE EXCHANGE RESOLVED THE PROBLEM. CAUSE REPORTED AS UNKNOWN. Manu…	-8.5/0.5/006	OD	Physician	12/03/2021	2021	22	Female
https://www.accessdata.fda.gov/scripts/cdrh/cfdocs/cfMAUDE/Detail.CFM?MDRFOI__ID=13123000&pc=QCB	2023826-2021-04780	2021-09-22 04:00:00	Injury	STAAR SURGICAL COMPANY	2021-12-30 05:00:00	QCB	IMPLANTABLE COLLAMER LENS (ICL)	Inadequacy of Device Shape and/or Size	Appropriate Clinical Signs, Symptoms, Conditions Term / Code Not Available	NA	Event Description: THE REPORTER INDICATED THAT A 13.2MM VTICM5 13.2 IMPLANTABLE COLLAMER LENS OF -12.5/1.5/093 (SPHERE/CYLINDER/AXIS) WAS IMPLANTED INTO THE PATIENTS RIGHT EYE (OD) ON (B)(6) 2021. ON (B)(6) 2021 THE LENS WAS EXCHANGED FOR A SHORTER LENGTH LENS DUE TO EXCESSIVE VAULT AND SIGNIFICANT REDUCTION OF IRIDOCORNEAL ANGLES. THE EXCHANGE RESOLVED THE PROBLEM. CAUSE REPORTED AS UNKNOWN. Man…	-12.5/1.5/093	OD	Physician	12/03/2021	2021	22	Female
https://www.accessdata.fda.gov/scripts/cdrh/cfdocs/cfMAUDE/Detail.CFM?MDRFOI__ID=13123001&pc=QCB	2023826-2021-04781	2021-09-22 04:00:00	Injury	STAAR SURGICAL COMPANY	2021-12-30 05:00:00	QCB	IMPLANTABLE COLLAMER LENS (ICL)	Inadequacy of Device Shape and/or Size	Appropriate Clinical Signs, Symptoms, Conditions Term / Code Not Available	NA	Event Description: THE REPORTER INDICATED THAT A 13.2MM VTICM5 13.2 IMPLANTABLE COLLAMER LENS OF -12.0/1.5/090 (SPHERE/ CYLINDER/ AXIS) WAS IMPLANTED INTO THE PATIENTS LEFT EYE (OS) ON (B)(6) 2021. ON (B)(6) 2021 THE LENS WAS EXCHANGED FOR A SHORTER LENGTH LENS DUE TO EXCESSIVE VAULT AND SIGNIFICANT REDUCTION OF IRIDOCORNEAL ANGLES. THE EXCHANGE RESOLVED THE PROBLEM. CAUSE REPORTED AS UNKNOWN. Ma…	-12.0/1.5/090	OS	Physician	12/03/2021	2021	22	Female
https://www.accessdata.fda.gov/scripts/cdrh/cfdocs/cfMAUDE/Detail.CFM?MDRFOI__ID=13296116&pc=QCB	2023826-2022-00242	2021-12-04 05:00:00	Injury	STAAR SURGICAL COMPANY	2022-01-19 05:00:00	QCB	IMPLANTABLE COLLAMER LENS (ICL)	Off-Label Use; Adverse Event Without Identified Device or Use Problem	Appropriate Clinical Signs, Symptoms, Conditions Term / Code Not Available		Event Description: THE REPORTER INDICATED THAT THE SURGEON IMPLANTED A 13.2MM VTICMO13.2; -15.5/2.5/178 (SPHERE/CYLINDER/AXIS) IMPLANTABLE COLLAMER LENS INTO THE PATIENT'S RIGHT EYE (OD) ON (B)(6) 2020. IT WAS REPORTED THE PATIENT EXPERIENCED MACULAR SPLITTING. ON (B)(6) 2021 THE LENS WAS EXCHANGED WITH A SAME MODEL/LENGTH LENS BUT DIFFERENT POWER LENS. THIS RESOLVED THE PROBLEM. POSTOP COMMENTS …	-15.5/2.5/178	OD	Physician	01/13/2022	2022	48	Female
https://www.accessdata.fda.gov/scripts/cdrh/cfdocs/cfMAUDE/Detail.CFM?MDRFOI__ID=13311248&pc=QCB	2023826-2022-00222	2021-11-18 05:00:00	Injury	STAAR SURGICAL COMPANY	2022-01-20 05:00:00	QCB	IMPLANTABLE COLLAMER LENS (ICL)	Inadequacy of Device Shape and/or Size	Appropriate Clinical Signs, Symptoms, Conditions Term / Code Not Available	NA	Event Description: THE REPORTER INDICATED THAT A 13.2MM VTICMO 13.2 IMPLANTABLE COLLAMER LENS OF -17.50/1.5/149 (SPHERE/CYLINDER/AXIS) WAS IMPLANTED INTO THE PATIENTS RIGHT EYE (OD) ON (B)(6) 2021. ON (B)(6) 2021, THE LENS WAS EXCHANGED FOR A SHORTER LENGTH LENS DUE TO EXCESSIVE VAULT AND SIGNIFICANT REDUCTION OF IRIDOCORNEAL ANGLES. THE EXCHANGE RESOLVED THE PROBLEM. CAUSE REPORTED AS PATIENT RE…	-17.50/1.5/149	OD	Physician	12/28/2021	2021	23	Male
https://www.accessdata.fda.gov/scripts/cdrh/cfdocs/cfMAUDE/Detail.CFM?MDRFOI__ID=13311278&pc=QCB	2023826-2022-00223	2021-11-18 05:00:00	Injury	STAAR SURGICAL COMPANY	2022-01-20 05:00:00	QCB	IMPLANTABLE COLLAMER LENS (ICL)	Inadequacy of Device Shape and/or Size	Appropriate Clinical Signs, Symptoms, Conditions Term / Code Not Available	NA	Event Description: THE REPORTER INDICATED THAT A 13.2MM VTICMO 13.2 IMPLANTABLE COLLAMER LENS OF -17.50/1.0/054 (SPHERE/CYLINDER/AXIS) WAS IMPLANTED INTO THE PATIENTS LEFT EYE (OS) ON (B)(6) 2021. ON (B)(6)2021, THE LENS WAS EXCHANGED FOR A SHORTER LENGTH LENS DUE TO EXCESSIVE VAULT AND SIGNIFICANT REDUCTION OF IRIDOCORNEAL ANGLES. THE EXCHANGE RESOLVED THE PROBLEM. CAUSE REPORTED AS PATIENT RELA…	-17.50/1.0/054	OS	Physician	12/28/2021	2021	23	Male
https://www.accessdata.fda.gov/scripts/cdrh/cfdocs/cfMAUDE/Detail.CFM?MDRFOI__ID=13476644&pc=QCB	2023826-2022-00422		Injury	STAAR SURGICAL COMPANY	2022-02-07 05:00:00	QCB	IMPLANTABLE COLLAMER LENS (ICL)	Inadequacy of Device Shape and/or Size	Appropriate Clinical Signs, Symptoms, Conditions Term / Code Not Available		Event Description: THE REPORTER INDICATED THAT THE SURGEON IMPLANTED A 13.2MM TMICL13.2; -14.00/1.0/145 (SPHERE/CYLINDER/AXIS) IMPLANTABLE COLLAMER LENS INTO THE PATIENT'S RIGHT EYE (OD) ON (B)(6) 202. IT WAS REPORTED THAT THE SIZE IS TOO LARGE CAUSING DANGEROUS VAULT AND INTERMITTENT ANGLE CLOSURE. LENS REMAINS IMPLANTED. ATTEMPTS TO OBTAIN ADDITIONAL INFORMATION HAVE NOT BEEN SUCCESSFUL. IF ADD…	-14.00/1.0/145	OD	Other Health Care Professional	01/10/2022	2022
https://www.accessdata.fda.gov/scripts/cdrh/cfdocs/cfMAUDE/Detail.CFM?MDRFOI__ID=13476664&pc=QCB	2023826-2022-00421		Injury	STAAR SURGICAL COMPANY	2022-02-07 05:00:00	QCB	IMPLANTABLE COLLAMER LENS (ICL)	Inadequacy of Device Shape and/or Size	Appropriate Clinical Signs, Symptoms, Conditions Term / Code Not Available		Event Description: THE REPORTER INDICATED THAT THE SURGEON IMPLANTED A 13.2MM TMICL13.2; -14.00/1.0/026 (SPHERE/CYLINDER/AXIS) IMPLANTABLE COLLAMER LENS INTO THE PATIENT'S LEFT EYE (OS) ON (B)(6) 2021. IT WAS REPORTED THAT THE SIZE IS TOO LARGE CAUSING DANGEROUS VAULT AND INTERMITTENT ANGLE CLOSURE. LENS REMAINS IMPLANTED. ATTEMPTS TO OBTAIN ADDITIONAL INFORMATION HAVE NOT BEEN SUCCESSFUL. IF ADD…	-14.00/1.0/026	OS	Other Health Care Professional	01/10/2022	2022
https://www.accessdata.fda.gov/scripts/cdrh/cfdocs/cfMAUDE/Detail.CFM?MDRFOI__ID=13488087&pc=QCB	2023826-2022-00424	2021-09-26 04:00:00	Injury	STAAR SURGICAL COMPANY	2022-02-08 05:00:00	QCB	IMPLANTABLE COLLAMER LENS (ICL)	Off-Label Use; Inadequacy of Device Shape and/or Size	Appropriate Clinical Signs, Symptoms, Conditions Term / Code Not Available		Event Description: THE REPORTER INDICATED THAT THE SURGEON IMPLANTED 12.6MM VTICMO12.6; -8.0/3.0/89 (SPHERE/CYLINDER/AXIS) IMPLANTABLE COLLAMER LENS INTO THE PATIENT'S RIGHT EYE (OD) ON (B)(6) 2021. THE PATIENT EXPERIENCED EXCESSIVE VAULTING AND SIGNIFICANT REDUCTION OF IRIDO-CORNEAL ANGLES. IT WAS ALSO INDICATED THE PATIENT'S ANGLE NARROWED SIGNIFICANTLY; AND ANTERIOR CHAMBER WAS 1570UM SHALLOW.…	-8.0/3.0/89	OD	Physician	02/06/2022	2022	20	Female
https://www.accessdata.fda.gov/scripts/cdrh/cfdocs/cfMAUDE/Detail.CFM?MDRFOI__ID=13580848&pc=QCB	2023826-2022-00569	2022-01-12 05:00:00	Injury	STAAR SURGICAL COMPANY	2022-02-22 05:00:00	QCB	IMPLANTABLE COLLAMER LENS (ICL)	Inadequacy of Device Shape and/or Size	Appropriate Clinical Signs, Symptoms, Conditions Term / Code Not Available		Event Description: THE REPORTER INDICATED THAT THE SURGEON IMPLANTED A 12.6MM VTICM5_12.6; -10.00/+2.0/093 (SPHERE/CYLINDER/AXIS) IMPLANTABLE COLLAMER LENS INTO THE PATIENT'S RIGHT EYE (OD) ON (B)(6) 2022. EXCESSIVE VAULTING AND SIGNIFICANT REDUCTION OF IRIDO-CORNEAL ANGLES WERE REPORTED. ON (B)(6) 2022 THE LENS WAS EXPLANTED. CAUSE OF THE EVENT WAS REPORTED AS UNKNOWN. Manufacturer Narrative: TH…	-10.00/+2.0/093	OD	Physician	01/26/2022	2022	37	Female
https://www.accessdata.fda.gov/scripts/cdrh/cfdocs/cfMAUDE/Detail.CFM?MDRFOI__ID=13588732&pc=QCB	2023826-2022-00577	2022-01-20 05:00:00	Injury	STAAR SURGICAL COMPANY	2022-02-23 05:00:00	QCB	IMPLANTABLE COLLAMER LENS (ICL)	Off-Label Use; Adverse Event Without Identified Device or Use Problem; No Apparent Adverse Event	Appropriate Clinical Signs, Symptoms, Conditions Term / Code Not Available	NA	Event Description: THE REPORTER INDICATED THE SURGEON IMPLANTED A 12.6MM VTICM5_12.6 IMPLANTABLE COLLAMER LENS, -11.50/+1.5/112 (SPHERE/CYLINDER/AXIS) INTO THE PATIENTS RIGHT EYE (OD) ON (B)(6) 2022. THE PATIENT EXPERIENCED TRANSIENT LOSS OF BCVA DUE TO THE SURGEON, TO DILATE THE PUPIL, INTRAOPERATIVELY ADMINISTERED MYDRANE INTRACAMERALLY INTO THE EYE, WHICH MAY HAVE CAUSED VISUAL PROBLEMS. THE P…	-11.50/+1.5/112	OD	Physician	01/24/2022	2022	73	Male
https://www.accessdata.fda.gov/scripts/cdrh/cfdocs/cfMAUDE/Detail.CFM?MDRFOI__ID=13588755&pc=QCB	2023826-2022-00578	2022-01-13 05:00:00	Injury	STAAR SURGICAL COMPANY	2022-02-23 05:00:00	QCB	IMPLANTABLE COLLAMER LENS (ICL)	Inadequacy of Device Shape and/or Size	Appropriate Clinical Signs, Symptoms, Conditions Term / Code Not Available	NA	Event Description: THE REPORTER INDICATED THE SURGEON IMPLANTED A 13.2MM VTICMO13.2 IMPLANTABLE COLLAMER LENS, -11.50/+1.5/074 (SPHERE/CYLINDER/AXIS), IN THE PATIENTS LEFT EYE (OS), ON (B)(6) 2022. THE LENS WAS EXPLANTED LATER THAT SAME DAY DUE TO EXCESSIVE VAULTING AND SIGNIFICANT REDUCTION OF IRIDO-CORNEAL ANGLES. THE LENS WAS REPLACED WITH ANOTHER SAME MODEL/LENGTH LENS (IMPLANTED VERTICALLY) …	-11.50/+1.5/074	OS	Physician	01/24/2022	2022	33	Female
https://www.accessdata.fda.gov/scripts/cdrh/cfdocs/cfMAUDE/Detail.CFM?MDRFOI__ID=13588761&pc=QCB	2023826-2022-00489	2022-01-03 05:00:00	Injury	STAAR SURGICAL COMPANY	2022-02-23 05:00:00	QCB	IMPLANTABLE COLLAMER LENS (ICL)	Device Dislodged or Dislocated	Appropriate Clinical Signs, Symptoms, Conditions Term / Code Not Available	NA	Event Description: THE REPORTER INDICATED THE SURGEON IMPLANTED A 13.2MM VTICM5_13.2 IMPLANTABLE COLLAMER LENS, -07.00/+1.0/111 (SPHERE/CYLINDER/AXIS), IN THE PATIENTS RIGHT EYE (OD) ON (B)(6) 2020. THE LENS WAS REPORTED AS LENS ROTATION NOT ASSOCIATED TO A LOW VAULT AND REMAINED IMPLANTED. THERE WAS AN INCREASE IN MYOPIA AND ASTIGMATISM. ADDITIONAL INFORMATION HAS BEEN REQUESTED BUT NONE HAS BEE…	-07.00/+1.0/111	OD	Physician	01/24/2022	2022	42	Male
https://www.accessdata.fda.gov/scripts/cdrh/cfdocs/cfMAUDE/Detail.CFM?MDRFOI__ID=13641144&pc=QCB	2023826-2022-00654	2021-09-23 04:00:00	Injury	STAAR SURGICAL COMPANY	2022-03-01 05:00:00	QCB	IMPLANTABLE COLLAMER LENS (ICL)	Misfocusing	Appropriate Clinical Signs, Symptoms, Conditions Term / Code Not Available	NA	Event Description: THE REPORTER INDICATED THE SURGEON IMPLANTED A 12.6MM VTICMO12.6 IMPLANTABLE COLLAMER LENS, -07.50/+2.5/102 (SPHERE/CYLINDER/AXIS), IN THE PATIENTS RIGHT EYE (OD), ON (B)(6) 2021. THE LENS WAS EXPLANTED ON (B)(6) 2022 DUE TO PATIENT EXPERIENCED A REFRACTIVE SURPRISE AND REFRACTIVE CHANGE OVERTIME. THE LENS WAS REPLACED WITH ANOTHER SAME MODEL/LENGTH BUT DIFFERENT DIOPTER LENS A…	-07.50/+2.5/102	OD	Physician	01/31/2022	2022	28	Female
https://www.accessdata.fda.gov/scripts/cdrh/cfdocs/cfMAUDE/Detail.CFM?MDRFOI__ID=13725932&pc=QCB	2023826-2022-00744	2022-01-15 05:00:00	Injury	STAAR SURGICAL COMPANY	2022-03-10 05:00:00	QCB	IMPLANTABLE COLLAMER LENS (ICL)	Inadequacy of Device Shape and/or Size	Appropriate Clinical Signs, Symptoms, Conditions Term / Code Not Available		Event Description: THE REPORTER INDICATED THAT A 13.2MM VTICM5 13.2 IMPLANTABLE COLLAMER LENS OF -12.0/2.5/104 (SPHERE/CYLINDER/AXIS) WAS IMPLANTED INTO THE PATIENTS RIGHT EYE (OD) ON (B)(6) 2022. THE PATIENT EXPERIENCED EXCESSIVE VAULT AND SIGNIFICANT REDUCTION OF IRIDO CORNEAL ANGLES. THE LENS REMAINS IMPLANTED. CAUSE REPORTED AS DEVICE. Manufacturer Narrative: ADDITIONAL INFORMATION: B1-ADVERS…	-12.0/2.5/104	OD	Physician	02/08/2022	2022	44	Male
https://www.accessdata.fda.gov/scripts/cdrh/cfdocs/cfMAUDE/Detail.CFM?MDRFOI__ID=13869352&pc=QCB	2023826-2022-00887	2021-09-26 04:00:00	Injury	STAAR SURGICAL COMPANY	2022-03-23 04:00:00	QCB	IMPLANTABLE COLLAMER LENS (ICL)	Off-Label Use; Inadequacy of Device Shape and/or Size	Appropriate Clinical Signs, Symptoms, Conditions Term / Code Not Available	NA	Event Description: THE REPORTER INDICATED THE SURGEON IMPLANTED A 12.6MM VTICMO12.6 IMPLANTABLE COLLAMER LENS, -09.00/+2.5/087 (SPHERE/CYLINDER/AXIS), IN THE PATIENTS LEFT EYE (OS), ON (B)(6) 2021. THE LENS WAS EXPLANTED ON (B)(6) 2021 DUE TO EXCESSIVE VAULTING AND SIGNIFICANT REDUCTION OF IRIDO-CORNEAL ANGLES. THE PROBLEM WAS RESOLVED. THE CAUSE OF THE EVENT WAS UNKNOWN. Manufacturer Narrative: …	-09.00/+2.5/087	OS	Physician	02/23/2022	2022	20	Female
https://www.accessdata.fda.gov/scripts/cdrh/cfdocs/cfMAUDE/Detail.CFM?MDRFOI__ID=13869607&pc=QCB	2023826-2022-00684	2021-10-21 04:00:00	Injury	STAAR SURGICAL COMPANY	2022-03-23 04:00:00	QCB	IMPLANTABLE COLLAMER LENS (ICL)	Inadequacy of Device Shape and/or Size; Patient-Device Incompatibility	Appropriate Clinical Signs, Symptoms, Conditions Term / Code Not Available	N/A	Event Description: THE REPORTER INDICATED THAT THE SURGEON IMPLANTED A 13.2MM VTICM5_13.2, -11.00/1.0/056 (SPHERE/CYLINDER/AXIS), IMPLANTABLE COLLAMER LENS INTO THE PATIENT'S RIGHT EYE (OD) ON (B)(6) 2021. THE LENS WAS REPLACED WITH A SHORTER LENGTH LENS DUE TO EXCESSIVE VAULT ON (B)(6) 2022. THIS RESOLVED THE PROBLEM. CAUSE OF THE EVENT IS REPORTED AS PATIENT RELATED FACTOR, ANGLE PRE-OP: 35.7 -…	-11.00/1.0/056	OD	Physician	02/28/2022	2022	36	Female
https://www.accessdata.fda.gov/scripts/cdrh/cfdocs/cfMAUDE/Detail.CFM?MDRFOI__ID=13944046&pc=QCB	2023826-2022-00980	2022-02-17 05:00:00	Injury	STAAR SURGICAL COMPANY	2022-03-29 04:00:00	QCB	IMPLANTABLE COLLAMER LENS (ICL)	Inadequacy of Device Shape and/or Size	Appropriate Clinical Signs, Symptoms, Conditions Term / Code Not Available	NA	Event Description: THE REPORTER INDICATED THE SURGEON INSERTED AND REMOVED A 13.7MM VTICM5_13.7 IMPLANTABLE COLLAMER LENS, -04.50/+3.5/108 (SPHERE/CYLINDER/AXIS), WITHIN THE SAME SURGERY DUE TO EXCESSIVE VAULTING AND SIGNIFICANT REDUCTION OF IRIDO-CORNEAL ANGLES. ADDITIONAL INFORMATION HAS BEEN REQUESTED BUT NONE HAS BEEN FORTHCOMING. Manufacturer Narrative: H3- DEVICE EVALUATION: THE LENS WAS RE…	-04.50/+3.5/108	NA	Physician	03/11/2022	2022	23	Male
https://www.accessdata.fda.gov/scripts/cdrh/cfdocs/cfMAUDE/Detail.CFM?MDRFOI__ID=13995877&pc=QCB	2023826-2022-00924	2022-02-24 05:00:00	Injury	STAAR SURGICAL COMPANY	2022-04-04 04:00:00	QCB	IMPLANTABLE COLLAMER LENS (ICL)	Inadequacy of Device Shape and/or Size	Appropriate Clinical Signs, Symptoms, Conditions Term / Code Not Available	N/A	Event Description: THE REPORTER INDICATED THAT THE SURGEON IMPLANTED A 13.2MM VTICM5_13.2, -13.50/3.0/099 (SPHERE/CYLINDER/AXIS), IMPLANTABLE COLLAMER LENS INTO THE PATIENT'S LEFT EYE (OS) ON (B)(6)2022. THE LENS WAS REPLACED WITH A SHORTER LENGTH LENS DUE TO EXCESSIVE VAULT AND SIGNIFICANT REDUCTION OF IRIDOCORNEAL ANGLES ON (B)(6) 2022. THIS RESOLVED THE PROBLEM. CAUSE OF THE EVENT IS REPORTED …	-13.50/3.0/099	OS	Physician	03/17/2022	2022	44	Female
https://www.accessdata.fda.gov/scripts/cdrh/cfdocs/cfMAUDE/Detail.CFM?MDRFOI__ID=14030182&pc=QCB	2023826-2022-01105	2022-03-16 04:00:00	Injury	STAAR SURGICAL COMPANY	2022-04-06 04:00:00	QCB	IMPLANTABLE COLLAMER LENS (ICL)	Inadequacy of Device Shape and/or Size; Adverse Event Without Identified Device or Use Problem	Appropriate Clinical Signs, Symptoms, Conditions Term / Code Not Available	P030016	Event Description: THE REPORTER INDICATED THE SURGEON IMPLANTED A TICL TORIC IMPLANTABLE COLLAMER LENS. WHEN INSERTING THE LENS, THE SURGEON THOUGHT THE LENS MAY HAVE BEEN INSERTING UPSIDE DOWN, BUT WHEN THE LENS UNFOLDED IN THE EYE, THE LENS WAS PROPERLY UNDER THE IRIS IN THE CORRECT ORIENTATION. AT ONE DAY POST-OP, THE EYE HAD A VERY SHALLOW ANTERIOR CHAMBER, INAPPRECIABLE VAULT AND UNRECORDABL…	-13.50/+1.0/089	OS	Physician	03/17/2022	2022	31	Male
https://www.accessdata.fda.gov/scripts/cdrh/cfdocs/cfMAUDE/Detail.CFM?MDRFOI__ID=14190873&pc=QCB	2023826-2022-01292	2022-03-22 04:00:00	Malfunction	STAAR SURGICAL COMPANY	2022-04-22 04:00:00	QCB	IMPLANTABLE COLLAMER LENS (ICL)	Inadequacy of Device Shape and/or Size	Appropriate Clinical Signs, Symptoms, Conditions Term / Code Not Available	N/A	Event Description: THE REPORTER INDICATED THAT A 12.6MM VTICM5_12.6, -7.5/+1.0/097 (SPHERE/CYLINDER/AXIS) IMPLANTABLE COLLAMER LENS WAS IMPLANTED INTO THE PATIENT'S LEFT EYE (OS) ON (B)(6) 2022. EXCESSIVE VAULT AND SIGNIFICANT REDUCTION OF IRIDO-CORNEAL ANGLES (ICA) IS REPORTED. REPORTEDLY, THE LENS REMAINS IMPLANTED. THE CAUSE OF THE EVENT IS REPORTED AS OTHER: OCOS. Manufacturer Narrative: WEIG…	-7.5/+1.0/097	OS	Physician	03/28/2022	2022	44	Female
https://www.accessdata.fda.gov/scripts/cdrh/cfdocs/cfMAUDE/Detail.CFM?MDRFOI__ID=14324153&pc=QCB	2023826-2022-01432		Malfunction	STAAR SURGICAL COMPANY	2022-05-07 04:00:00	QCB	IMPLANTABLE COLLAMER LENS (ICL)	Off-Label Use; Inadequacy of Device Shape and/or Size	Appropriate Clinical Signs, Symptoms, Conditions Term / Code Not Available	NA	Event Description: THE REPORTER INDICATED THAT A 13.7MM VTICMO 13.7 IMPLANTABLE COLLAMER LENS OF -12.5/4.0/115 (SPHERE/CYLINDER/AXIS) WAS IMPLANTED INTO THE PATIENTS RIGHT EYE (OD) ON (B)(6) 2021. REPORTEDLY, WRONG SIZE OF THE LENS, TOO BIG. THE LENS REMAINS IMPLANTED. STATUS OF THE EYE REPORTED AS MIXED ASTIGMATISM. "THE APC IS OPEN IN ALL SEGMENTS, THE PUPILLARY EDGE OF THE IRIS IS RAISED AND I…	-12.5/4.0/115	OD	Physician	04/06/2022	2022		Female
https://www.accessdata.fda.gov/scripts/cdrh/cfdocs/cfMAUDE/Detail.CFM?MDRFOI__ID=14350005&pc=QCB	2023826-2022-01430	2022-04-08 04:00:00	Injury	STAAR SURGICAL COMPANY	2022-05-10 04:00:00	QCB	IMPLANTABLE COLLAMER LENS (ICL)	Misfocusing; Inadequacy of Device Shape and/or Size	Appropriate Clinical Signs, Symptoms, Conditions Term / Code Not Available	P030016	Event Description: THE REPORTER INDICATED THAT A 13.2MM VTICM5 13.2 IMPLANTABLE COLLAMER LENS OF -5.0/5.0/089 (SPHERE/CYLINDER/AXIS) WAS IMPLANTED INTO THE PATIENTS RIGHT EYE (OD) ON (B)(6) 2022. EXCESSIVE VAULT AND SIGNIFICANT REDUCTION OF IRIDOCORNEAL ANGLES WAS REPORTED. LENS REMAINS IMPLANTED. CAUSE REPORTED AS DEVICE. "LENS TOO BIG." IF ADDITIONAL INFORMATION IS RECEIVED A SUPPLEMENTAL MEDWA…	-5.0/5.0/089	OD	Physician	04/08/2022	2022	39	Female
https://www.accessdata.fda.gov/scripts/cdrh/cfdocs/cfMAUDE/Detail.CFM?MDRFOI__ID=14365088&pc=QCB	2023826-2022-01480	2022-03-01 05:00:00	Injury	STAAR SURGICAL COMPANY	2022-05-11 04:00:00	QCB	IMPLANTABLE COLLAMER LENS (ICL)	Inadequacy of Device Shape and/or Size	Appropriate Clinical Signs, Symptoms, Conditions Term / Code Not Available	P030016	Event Description: THE REPORTER INDICATED THE SURGEON IMPLANTED A 13.2MM VTICM5_13.2 IMPLANTABLE COLLAMER LENS, -09.00/+2.5/089 (SPHERE/CYLINDER/AXIS) IN THE PATIENTS LEFT EYE (OS), ON (B)(6) 2022. THE LENS WAS EXPLANTED ON (B)(6) 2022 DUE TO EXCESSIVE VAULTING AND SIGNIFICANT REDUCTION OF IRIDO-CORNEAL ANGLES. THE LENS WAS REPLACED WITH A SHORTER LENS AND THE PROBLEM WAS RESOLVED. PATIENT IS DOI…	-09.00/+2.5/089	OS	Physician	04/13/2022	2022	38	Female
https://www.accessdata.fda.gov/scripts/cdrh/cfdocs/cfMAUDE/Detail.CFM?MDRFOI__ID=14431927&pc=QCB	2023826-2022-01580	2022-04-17 04:00:00	Injury	STAAR SURGICAL COMPANY	2022-05-18 04:00:00	QCB	IMPLANTABLE COLLAMER LENS (ICL)	Misfocusing; Inadequacy of Device Shape and/or Size; Device Dislodged or Dislocated	Appropriate Clinical Signs, Symptoms, Conditions Term / Code Not Available	P030016	Event Description: THE REPORTER INDICATED THE SURGEON IMPLANTED A 13.2MM VTICMO13.2 IMPLANTABLE COLLAMER LENS, -10.00/+1.0/092 (SPHERE/CYLINDER/AXIS) INTO THE PATIENTS RIGHT EYE (OD) ON (B)(6) 2016. THE LENS WAS REPORTED AS LOW VAULTING, LENS ROTATION AND REFRACTIVE CHANGE OVERTIME. THE LENS REMAINED IMPLANTED. THE CAUSE OF THE EVENT WAS UNKNOWN. ADDITIONAL INFORMATION HAS BEEN REQUESTED BUT NONE…	-10.00/+1.0/092	OD	Physician	04/19/2022	2022	28	Male
https://www.accessdata.fda.gov/scripts/cdrh/cfdocs/cfMAUDE/Detail.CFM?MDRFOI__ID=14432041&pc=QCB	2023826-2022-01583	2022-04-05 04:00:00	Malfunction	STAAR SURGICAL COMPANY	2022-05-18 04:00:00	QCB	IMPLANTABLE COLLAMER LENS (ICL)	Inadequacy of Device Shape and/or Size	Appropriate Clinical Signs, Symptoms, Conditions Term / Code Not Available	P030016	Event Description: THE REPORTER INDICATED THE SURGEON IMPLANTED A 13.7MM VTICMO13.7 IMPLANTABLE COLLAMER LENS, -15.00/+1.0/066 (SPHERE/CYLINDER/AXIS) INTO THE PATIENTS RIGHT EYE (OD). THE LENS WAS REPORTED AS EXCESSIVE VAULTING AND SIGNIFICANT REDUCTION OF IRIDO-CORNEAL ANGLES (NARROW ANGLES). THE LENS REMAINED IMPLANTED. THE CAUSE OF THE EVENT WAS DUE TO SIZING ERROR DUE TO ACD. ADDITIONAL INFOR…	-15.00/+1.0/066	OD	Physician	04/20/2022	2022	24	Female
https://www.accessdata.fda.gov/scripts/cdrh/cfdocs/cfMAUDE/Detail.CFM?MDRFOI__ID=14440075&pc=QCB	2023826-2022-01581	2022-04-17 04:00:00	Injury	STAAR SURGICAL COMPANY	2022-05-19 04:00:00	QCB	IMPLANTABLE COLLAMER LENS (ICL)	Inadequacy of Device Shape and/or Size; Device Dislodged or Dislocated	Appropriate Clinical Signs, Symptoms, Conditions Term / Code Not Available	P030016	Event Description: THE REPORTER INDICATED THE SURGEON IMPLANTED A 13.2MM VTICMO13.2 IMPLANTABLE COLLAMER LENS, -10.00/+1.0/092 (SPHERE/CYLINDER/AXIS) INTO THE PATIENTS LEFT EYE (OS) ON (B)(6) 2016. THE LENS WAS REPORTED AS LOW VAULTING, LENS ROTATION AND REFRACTIVE CHANGE OVERTIME. THE LENS REMAINED IMPLANTED. THE CAUSE OF THE EVENT WAS UNKNOWN. ADDITIONAL INFORMATION HAS BEEN REQUESTED BUT NONE …	-10.00/+1.0/092	OS	Physician	04/19/2022	2022	28	Male
https://www.accessdata.fda.gov/scripts/cdrh/cfdocs/cfMAUDE/Detail.CFM?MDRFOI__ID=14455506&pc=QCB	2023826-2022-01584	2022-04-05 04:00:00	Malfunction	STAAR SURGICAL COMPANY	2022-05-20 04:00:00	QCB	IMPLANTABLE COLLAMER LENS (ICL)	Inadequacy of Device Shape and/or Size	Appropriate Clinical Signs, Symptoms, Conditions Term / Code Not Available	P030016	Event Description: THE REPORTER INDICATED THE SURGEON IMPLANTED A 13.7MM VTICMO13.7 IMPLANTABLE COLLAMER LENS, -15.00/+1.0/100 (SPHERE/CYLINDER/AXIS) INTO THE PATIENTS LEFT EYE (OS). THE LENS WAS REPORTED AS EXCESSIVE VAULTING AND SIGNIFICANT REDUCTION OF IRIDO-CORNEAL ANGLES. THE LENS REMAINED IMPLANTED. THE CAUSE OF THE EVENT WAS DUE TO SIZING ERROR DUE TO ACD. ADDITIONAL INFORMATION HAS BEEN R…	-15.00/+1.0/100	OS	Physician	04/20/2022	2022	24	Female
https://www.accessdata.fda.gov/scripts/cdrh/cfdocs/cfMAUDE/Detail.CFM?MDRFOI__ID=14504817&pc=QCB	2023826-2022-01614	2022-04-23 04:00:00	Injury	STAAR SURGICAL COMPANY	2022-05-26 04:00:00	QCB	IMPLANTABLE COLLAMER LENS (ICL)	Inadequacy of Device Shape and/or Size	Appropriate Clinical Signs, Symptoms, Conditions Term / Code Not Available	P030016	Event Description: THE REPORTER INDICATED THAT A 12.6MM VTICMO 12.6 IMPLANTABLE COLLAMER LENS OF -11.5/2.0/153 (SPHERE/CYLINDER/AXIS) WAS IMPLANTED INTO THE PATIENT'S RIGHT EYE (OD) ON (B)(6) 2022. ON (B)(6) 2022 THE LENS WAS EXPLANTED DUE TO EXCESSIVE VAULT AND SIGNIFICANT REDUCTION OF IRIDOCORNEAL ANGLES. THE PROBLEM WAS NOT RESOLVED. "VAULT WAS HIGH AND PATIENT WAS ACCEPTING +2 POST OPERATIVEL…	-11.5/2.0/153	OD	Physician	04/27/2022	2022	27	Male
https://www.accessdata.fda.gov/scripts/cdrh/cfdocs/cfMAUDE/Detail.CFM?MDRFOI__ID=14505166&pc=QCB	2023826-2022-01615	2022-04-18 04:00:00	Injury	STAAR SURGICAL COMPANY	2022-05-26 04:00:00	QCB	IMPLANTABLE COLLAMER LENS (ICL)	Inadequacy of Device Shape and/or Size	Appropriate Clinical Signs, Symptoms, Conditions Term / Code Not Available	P030016	Event Description: THE REPORTER INDICATED THAT A 13.7MM VTICM5 13.7 IMPLANTABLE COLLAMER LENS OF -12.0/5.5/042 (SPHERE/CYLINDER/AXIS) WAS IMPLANTED INTO THE PATIENT'S LEFT EYE (OS) ON (B)(6) 2022. ON (B)(6) 2022 THE LENS WAS EXPLANTED DUE TO EXCESSIVE VAULT AND SIGNIFICANT REDUCTION OF IRIDOCORNEAL ANGLES. THE PROBLEM WAS NOT RESOLVED. "PATIENT REQUESTED TIME TO DECIDE ABOUT EXCHANGE OF SMALLER S…	-12.0/5.5/042	OS	Physician	04/27/2022	2022	25	Male
https://www.accessdata.fda.gov/scripts/cdrh/cfdocs/cfMAUDE/Detail.CFM?MDRFOI__ID=14538894&pc=QCB	2023826-2022-01667	2022-04-13 04:00:00	Injury	STAAR SURGICAL COMPANY	2022-05-29 04:00:00	QCB	IMPLANTABLE COLLAMER LENS (ICL)	Inadequacy of Device Shape and/or Size	Appropriate Clinical Signs, Symptoms, Conditions Term / Code Not Available	NA	Event Description: THE REPORTER INDICATED THE SURGEON IMPLANTED A 13.2MM VTICM13.2 IMPLANTABLE COLLAMER LENS, -08.50/+0.5/079 (SPHERE/CYLINDER/AXIS) INTO THE PATIENTS RIGHT EYE (OD) ON (B)(6) 2012. THE LENS WAS REPORTED AS LOW VAULTING AND REFRACTIVE CHANGE OVERTIME. THE LENS REMAINED IMPLANTED. THE CAUSE OF THE EVENT WAS UNKNOWN. ADDITIONAL INFORMATION HAS BEEN REQUESTED BUT NONE HAS BEEN FORTHC…	-08.50/+0.5/079	OD	Physician	05/06/2022	2022	46	Female
https://www.accessdata.fda.gov/scripts/cdrh/cfdocs/cfMAUDE/Detail.CFM?MDRFOI__ID=14553237&pc=QCB	2023826-2022-01668	2022-04-13 04:00:00	Injury	STAAR SURGICAL COMPANY	2022-05-31 04:00:00	QCB	IMPLANTABLE COLLAMER LENS (ICL)	Inadequacy of Device Shape and/or Size	Appropriate Clinical Signs, Symptoms, Conditions Term / Code Not Available	NA	Event Description: THE REPORTER INDICATED THE SURGEON IMPLANTED A 13.2MM VTICM13.2 IMPLANTABLE COLLAMER LENS, -08.50/+1.0/083 (SPHERE/CYLINDER/AXIS) INTO THE PATIENTS LEFT EYE (OS) ON (B)(6) 2012. THE LENS WAS REPORTED AS LOW VAULTING AND REFRACTIVE CHANGE OVERTIME. THE LENS REMAINED IMPLANTED. THE CAUSE OF THE EVENT WAS UNKNOWN. ADDITIONAL INFORMATION HAS BEEN REQUESTED BUT NONE HAS BEEN FORTHCO…	-08.50/+1.0/083	OS	Physician	05/06/2022	2022	46	Female
https://www.accessdata.fda.gov/scripts/cdrh/cfdocs/cfMAUDE/Detail.CFM?MDRFOI__ID=14734164&pc=QCB	2023826-2022-01852		Malfunction	STAAR SURGICAL COMPANY	2022-06-17 04:00:00	QCB	IMPLANTABLE COLLAMER LENS (ICL)	No Apparent Adverse Event	Appropriate Clinical Signs, Symptoms, Conditions Term / Code Not Available	P030016	Event Description: THE REPORTER INDICATED THE SURGEON IMPLANTED A 12.5MM TICM125V4 IMPLANTABLE COLLAMER LENS, -20.00/+3.5/080 (SPHERE/CYLINDER/AXIS), IN THE PATIENTS LEFT EYE (OS), ON (B)(6) 2011. THE REPORTER INDICATED THE LENS WILL BE EXPLANTED/EXCHANGED DUE TO PROGRESSIVE MYOPIA AND ASTIGMATISM. THE LENS REMAINED IMPLANTED. ADDITIONAL INFORMATION HAS BEEN REQUESTED BUT NONE HAS BEEN FORTHCOMIN…	-20.00/+3.5/080	OS	Physician	05/18/2022	2022		Female
https://www.accessdata.fda.gov/scripts/cdrh/cfdocs/cfMAUDE/Detail.CFM?MDRFOI__ID=14734191&pc=QCB	2023826-2022-01851		Malfunction	STAAR SURGICAL COMPANY	2022-06-17 04:00:00	QCB	IMPLANTABLE COLLAMER LENS (ICL)	No Apparent Adverse Event	Appropriate Clinical Signs, Symptoms, Conditions Term / Code Not Available	P030016	Event Description: THE REPORTER INDICATED THE SURGEON IMPLANTED A 12.5MM TICM125V4 IMPLANTABLE COLLAMER LENS, -19.50/+3.0/130 (SPHERE/CYLINDER/AXIS), IN THE PATIENTS RIGHT EYE (OD), ON (B)(6) 2011. THE REPORTER INDICATED THE LENS WILL BE EXPLANTED/EXCHANGED DUE TO PROGRESSIVE MYOPIA AND ASTIGMATISM. THE LENS REMAINED IMPLANTED. ADDITIONAL INFORMATION HAS BEEN REQUESTED BUT NONE HAS BEEN FORTHCOMI…	-19.50/+3.0/130	OD	Physician	05/18/2022	2022		Female
https://www.accessdata.fda.gov/scripts/cdrh/cfdocs/cfMAUDE/Detail.CFM?MDRFOI__ID=14750598&pc=QCB	2023826-2022-01924	2022-05-21 04:00:00	Injury	STAAR SURGICAL COMPANY	2022-06-20 04:00:00	QCB	IMPLANTABLE COLLAMER LENS (ICL)	Inadequacy of Device Shape and/or Size	Appropriate Clinical Signs, Symptoms, Conditions Term / Code Not Available	P030016	Event Description: THE REPORTER INDICATED THAT A 13.2MM VTICMO 13.2 IMPLANTABLE COLLAMER LENS OF -16.0/6.0/093 (SPHERE/CYLINDER/AXIS) WAS IMPLANTED INTO THE LEFT EYE (OS) ON (B)(6) 2022. EXCESSIVE VAULT AND SIGNIFICANT REDUCTION OF IRIDO CORNEAL ANGLES WAS OBSERVED. LENS REMAINS IMPLANTED. CAUSE REPORTED AS DEVICE. Manufacturer Narrative: B2-REQUIRED INTERVENTION TO PREVENT PERMANENT IMPAIRMENT/D…	-16.0/6.0/093	OS	Physician	05/23/2022	2022	26	Female
https://www.accessdata.fda.gov/scripts/cdrh/cfdocs/cfMAUDE/Detail.CFM?MDRFOI__ID=14985511&pc=QCB	2023826-2022-02119	2022-06-01 04:00:00	Injury	STAAR SURGICAL COMPANY	2022-07-12 04:00:00	QCB	IMPLANTABLE COLLAMER LENS (ICL)	Inadequacy of Device Shape and/or Size	Appropriate Clinical Signs, Symptoms, Conditions Term / Code Not Available	P030016	Event Description: THE REPORTER INDICATED THAT THE SURGEON IMPLANTED A 13.2MM VTICMO13.2, -10.00/1.5/091 (SPHERE/CYLINDER/AXIS), IMPLANTABLE COLLAMER LENS INTO THE PATIENT'S LEFT EYE (OS) ON (B)(6) 2022. THE LENS WAS REPLACED WITH A SHORTER LENGTH LENS DUE TO SIGNIFICANT REDUCTION OF IRIDO-CORNEAL ANGLES AND EXCESSIVE VAULT ON (B)(6) 2022. THIS RESOLVED THE PROBLEM. CAUSE OF THE EVENT IS REPORTED…	-10.00/1.5/091	OS	Physician	06/20/2022	2022	43	Female
https://www.accessdata.fda.gov/scripts/cdrh/cfdocs/cfMAUDE/Detail.CFM?MDRFOI__ID=14985513&pc=QCB	2023826-2022-02118	2022-06-01 04:00:00	Injury	STAAR SURGICAL COMPANY	2022-07-12 04:00:00	QCB	IMPLANTABLE COLLAMER LENS (ICL)	Inadequacy of Device Shape and/or Size	Appropriate Clinical Signs, Symptoms, Conditions Term / Code Not Available	P030016	Event Description: THE REPORTER INDICATED THAT THE SURGEON IMPLANTED A 13.2MM VTICMO13.2, -11.00/1.5/090 (SPHERE/CYLINDER/AXIS), IMPLANTABLE COLLAMER LENS INTO THE PATIENT'S RIGHT EYE (OD) ON (B)(6) 2022. THE LENS WAS REPLACED WITH A SHORTER LENGTH LENS DUE TO SIGNIFICANT REDUCTION OF IRIDO-CORNEAL ANGLES AND EXCESSIVE VAULT ON (B)(6) 2022. THIS RESOLVED THE PROBLEM. CAUSE OF THE EVENT IS REPORTE…	-11.00/1.5/090	OD	Physician	06/20/2022	2022	43	Female
https://www.accessdata.fda.gov/scripts/cdrh/cfdocs/cfMAUDE/Detail.CFM?MDRFOI__ID=14985514&pc=QCB	2023826-2022-02130	2022-01-11 05:00:00	Injury	STAAR SURGICAL COMPANY	2022-07-12 04:00:00	QCB	IMPLANTABLE COLLAMER LENS (ICL)	Off-Label Use; Inadequacy of Device Shape and/or Size	Appropriate Clinical Signs, Symptoms, Conditions Term / Code Not Available	P030016	Event Description: THE REPORTER INDICATED THAT THE SURGEON IMPLANTED A 13.2MM VTICMO13.2, -09.50/3.0/094 (SPHERE/CYLINDER/AXIS), IMPLANTABLE COLLAMER LENS INTO THE PATIENT'S RIGHT EYE (OD) ON (B)(6) 2022. THE LENS WAS REPLACED WITH A SHORTER LENGTH LENS DUE TO EXCESSIVE VAULT ON (B)(6) 2022. THIS RESOLVED THE PROBLEM. CAUSE OF THE EVENT IS REPORTED AS UNKNOWN. Manufacturer Narrative: (B)(4).	-09.50/3.0/094	OD	Physician	06/21/2022	2022	34	Female
https://www.accessdata.fda.gov/scripts/cdrh/cfdocs/cfMAUDE/Detail.CFM?MDRFOI__ID=14985546&pc=QCB	2023826-2022-02142	2022-05-16 04:00:00	Injury	STAAR SURGICAL COMPANY	2022-07-12 04:00:00	QCB	IMPLANTABLE COLLAMER LENS (ICL)	Inadequacy of Device Shape and/or Size	Appropriate Clinical Signs, Symptoms, Conditions Term / Code Not Available	P030016	Event Description: THE REPORTER INDICATED THAT THE SURGEON IMPLANTED A 13.2MM VTICMO13.2, -15.0/3.0/095 (SPHERE/CYLINDER/AXIS), IMPLANTABLE COLLAMER LENS INTO THE PATIENT'S RIGHT EYE (OD) ON (B)(6) 2022. THE LENS WAS REPLACED WITH A SHORTER LENGTH LENS DUE TO SIGNIFICANT REDUCTION OF IRIDO-CORNEAL ANGLES AND EXCESSIVE VAULT ON (B)(6) 2022. THIS RESOLVED THE PROBLEM. CAUSE OF THE EVENT IS REPORTED…	-15.0/3.0/095	OD	Physician	06/24/2022	2022	29	Female
https://www.accessdata.fda.gov/scripts/cdrh/cfdocs/cfMAUDE/Detail.CFM?MDRFOI__ID=14985559&pc=QCB	2023826-2022-02144	2022-06-23 04:00:00	Injury	STAAR SURGICAL COMPANY	2022-07-12 04:00:00	QCB	IMPLANTABLE COLLAMER LENS (ICL)	Off-Label Use; Inadequacy of Device Shape and/or Size	Appropriate Clinical Signs, Symptoms, Conditions Term / Code Not Available	P030016	Event Description: THE REPORTER INDICATED THAT THE SURGEON IMPLANTED A 12.6MM VTICMO 12.6, -10.5/3.0/009 (SPHERE/CYLINDER/AXIS), IMPLANTABLE COLLAMER LENS INTO THE PATIENT'S RIGHT EYE (OD) ON (B)(6) 2022. THE LENS WAS REPLACED WITH A LONGER LENGTH LENS DUE TO LOW VAULT ON (B)(6) 2022. THIS RESOLVED THE PROBLEM. CAUSE OF THE EVENT IS REPORTED AS UNKNOWN. Manufacturer Narrative: WEIGHT: UNK, ETHNIC…	-10.5/3.0/009	OD	Physician	06/24/2022	2022	33	Female
https://www.accessdata.fda.gov/scripts/cdrh/cfdocs/cfMAUDE/Detail.CFM?MDRFOI__ID=14987248&pc=QCB	2023826-2022-02070	2022-04-28 04:00:00	Malfunction	STAAR SURGICAL COMPANY	2022-07-12 04:00:00	QCB	IMPLANTABLE COLLAMER LENS (ICL)	Inadequacy of Device Shape and/or Size	Appropriate Clinical Signs, Symptoms, Conditions Term / Code Not Available	P030016	Event Description: THE REPORTER INDICATED THAT A 13.2MM VTICMO 13.2 IMPLANTABLE COLLAMER LENS OF -15.0/1.5/080 (SPHERE/CYLINDER/AXIS) WAS IMPLANTED INTO THE PATIENTS LEFT EYE (OS) ON (B)(6) 2022. EXCESSIVE VAULT AND SIGNIFICANT REDUCTION OF IRIDO-CORNEAL ANGLES (ICA) IS REPORTED. REPORTEDLY, THE LENS REMAINS IMPLANTED. THE CAUSE OF EVENT IS REPORTED AS OTHER: ICL CALCULATION SOFTWARE AND/OR WTW F…	-15.0/1.5/091	OS	Physician	06/10/2022	2022	32	Female
https://www.accessdata.fda.gov/scripts/cdrh/cfdocs/cfMAUDE/Detail.CFM?MDRFOI__ID=15003802&pc=QCB	2023826-2022-02200		Malfunction	STAAR SURGICAL COMPANY	2022-07-13 04:00:00	QCB	IMPLANTABLE COLLAMER LENS (ICL)	No Apparent Adverse Event	Appropriate Clinical Signs, Symptoms, Conditions Term / Code Not Available	P030016	Event Description: THE REPORTER INDICATED THE SURGEON IMPLANTED A 12.6MM VTICM5_12.6 IMPLANTABLE COLLAMER LENS, -02.00/+1.0/074 (SPHERE/CYLINDER/AXIS), INTO THE PATIENTS RIGHT EYE (OD). THE REPORTER INDICATED AFTER RE-EXAMINATION, THE FREQUENCY CHANGED AND THE LENS REMAINED IMPLANTED. ADDITIONAL INFORMATION HAS BEEN REQUESTED BUT NONE HAS BEEN FORTHCOMING. Manufacturer Narrative: (B)(4). WORK ORD…	-02.00/+1.0/074	OD	Physician	06/13/2022	2022		Male
https://www.accessdata.fda.gov/scripts/cdrh/cfdocs/cfMAUDE/Detail.CFM?MDRFOI__ID=15008811&pc=QCB	2023826-2022-02204	2022-06-14 04:00:00	Injury	STAAR SURGICAL COMPANY	2022-07-13 04:00:00	QCB	IMPLANTABLE COLLAMER LENS (ICL)	Inadequacy of Device Shape and/or Size	Appropriate Clinical Signs, Symptoms, Conditions Term / Code Not Available	P030016	Event Description: THE REPORTER INDICATED THE SURGEON IMPLANTED A 13.2MM VTICMO13.2 IMPLANTABLE COLLAMER LENS, -14.50/+2.5/109 (SPHERE/CYLINDER/AXIS), IN THE PATIENTS RIGHT EYE (OD), ON (B)(6) 2022. THE LENS WAS EXPLANTED ON (B)(6) 2022 DUE TO EXCESSIVE VAULTING AND SIGNIFICANT REDUCTION OF IRIDO-CORNEAL ANGLES. THE LENS WAS REPLACED WITH A SHORTER LENS AND THE PROBLEM WAS RESOLVED. THE CAUSE OF …	-14.50/+2.5/109	OD	Physician	06/16/2022	2022	21	Male
https://www.accessdata.fda.gov/scripts/cdrh/cfdocs/cfMAUDE/Detail.CFM?MDRFOI__ID=15008945&pc=QCB	2023826-2022-02201		Malfunction	STAAR SURGICAL COMPANY	2022-07-13 04:00:00	QCB	IMPLANTABLE COLLAMER LENS (ICL)	No Apparent Adverse Event	Appropriate Clinical Signs, Symptoms, Conditions Term / Code Not Available	P030016	Event Description: THE REPORTER INDICATED THE SURGEON IMPLANTED A 12.6MM VTICM5_12.6 IMPLANTABLE COLLAMER LENS, -02.00/+1.5/100 (SPHERE/CYLINDER/AXIS), INTO THE PATIENTS LEFT EYE (OS). THE REPORTER INDICATED AFTER RE-EXAMINATION, THE FREQUENCY CHANGED AND THE LENS REMAINED IMPLANTED. ADDITIONAL INFORMATION HAS BEEN REQUESTED BUT NONE HAS BEEN FORTHCOMING. Manufacturer Narrative: AGE OR DATE OF BI…	-02.00/+1.5/100	OS	Physician	06/13/2022	2022		Male
https://www.accessdata.fda.gov/scripts/cdrh/cfdocs/cfMAUDE/Detail.CFM?MDRFOI__ID=15047190&pc=QCB	2023826-2022-02210	2022-06-29 04:00:00	Injury	STAAR SURGICAL COMPANY	2022-07-18 04:00:00	QCB	IMPLANTABLE COLLAMER LENS (ICL)	Inadequacy of Device Shape and/or Size	Appropriate Clinical Signs, Symptoms, Conditions Term / Code Not Available	P030016	Event Description: THE REPORTER INDICATED THAT THE SURGEON IMPLANTED A 13.2MM VTICMO13.2 IMPLANTABLE COLLAMER LENS OF DIOPTER -9.0/+4.0/091 INTO THE PATIENT'S LEFT EYE (OS) ON (B)(6) 2022. THE LENS WAS EXCHANGED ON (B)(6) 2022 FOR A SHORTER LENGTH LENS DUE TO EXCESSIVE VAULT AND SIGNIFICANT REDUCTION OF IRIDO-CORNEAL ANGLES. THIS RESOLVED THE PROBLEM. CAUSE WAS REPORTED AS UNKNOWN AND THE REPORTE…	-9.0/+4.0/091	OS	Physician	07/05/2022	2022	24	Female
https://www.accessdata.fda.gov/scripts/cdrh/cfdocs/cfMAUDE/Detail.CFM?MDRFOI__ID=15048209&pc=QCB	2023826-2022-02303		Malfunction	STAAR SURGICAL COMPANY	2022-07-18 04:00:00	QCB	IMPLANTABLE COLLAMER LENS (ICL)	Inadequacy of Device Shape and/or Size	Appropriate Clinical Signs, Symptoms, Conditions Term / Code Not Available	P030016	Event Description: THE REPORTER INDICATED THAT A 13.2MM, VTICMO13.2, -16.0/1.5/114 (SPHERE/CYLINDER/AXIS) IMPLANTABLE COLLAMER LENS WAS IMPLANTED INTO THE PATIENTS RIGHT EYE (OD) ON (B)(6) 2022. THE PATIENT EXPERIENCED HIGH VAULT AND NARROW ANGLES, LENS REMAINS IMPLANTED. THE REPORTER STATED THAT THE PATIENT IS DOING WELL, IOP 17/18 EXCELLENT VISION 20/40. IF ADDITIONAL INFORMATION IS RECEIVED A …	-16.0/1.5/114	OD	Physician	06/18/2022	2022		Female
https://www.accessdata.fda.gov/scripts/cdrh/cfdocs/cfMAUDE/Detail.CFM?MDRFOI__ID=15080946&pc=QCB	2023826-2022-02372	2022-07-08 04:00:00	Malfunction	STAAR SURGICAL COMPANY	2022-07-21 04:00:00	QCB	IMPLANTABLE COLLAMER LENS (ICL)	Inadequacy of Device Shape and/or Size; Patient Device Interaction Problem	Appropriate Clinical Signs, Symptoms, Conditions Term / Code Not Available	P030016	Event Description: THE REPORTER INDICATED THAT THE SURGEON IMPLANTED A 13.2MM VTICM13.2; -11.00/2/109 (SPHERE/CYLINDER/AXIS) IMPLANTABLE COLLAMER LENS INTO THE PATIENT'S LEFT EYE (OS) ON (B)(6) 2022 THE PATIENT EXPERIENCED EXCESSIVE VAULTING AND IT WAS NOTED "IRIS TINTED". INTRAOPERATIVELY THE SURGEON REMOVED AND REPLACED THE LENS WITH A SHORTER LENGTH LENS AND THIS RESOLVED THE PROBLEM. THE CAUS…	-11.00/2/109	OS	Other Health Care Professional	07/11/2022	2022	37	Female
https://www.accessdata.fda.gov/scripts/cdrh/cfdocs/cfMAUDE/Detail.CFM?MDRFOI__ID=15108220&pc=QCB	2023826-2022-02442	2022-03-09 05:00:00	Injury	STAAR SURGICAL COMPANY	2022-07-26 04:00:00	QCB	IMPLANTABLE COLLAMER LENS (ICL)	Inadequacy of Device Shape and/or Size	Appropriate Clinical Signs, Symptoms, Conditions Term / Code Not Available	P030016	Event Description: THE REPORTER INDICATED THAT A 13.2MM VTICMO13.2 -17.00/+2.50/90 (SPHERE/CYLINDER/AXIS) IMPLANTABLE COLLAMER LENS WAS IMPLANTED INTO THE PATIENT'S RIGHT EYE (OD) ON (B)(6) 2022. ON THE SAME DATE BUT DIFFERENT SURGERY THE LENS WAS EXPLANTED DUE TO EXCESSIVE VAULT AND SIGNIFICANT REDUCTION OF IRIDO-CORNEAL ANGLES. ON (B)(6) 2022 A REPLACEMENT LENS OF LONGER LENGTH WAS IMPLANTED AN…	-17.00/+2.50/90	OD	Physician	06/28/2022	2022	18	Male
https://www.accessdata.fda.gov/scripts/cdrh/cfdocs/cfMAUDE/Detail.CFM?MDRFOI__ID=15126877&pc=QCB	2023826-2022-02501		Injury	STAAR SURGICAL COMPANY	2022-07-28 04:00:00	QCB	IMPLANTABLE COLLAMER LENS (ICL)	Adverse Event Without Identified Device or Use Problem	Appropriate Clinical Signs, Symptoms, Conditions Term / Code Not Available	P030016	Event Description: THE REPORTER INDICATED THAT THE SURGEON IMPLANTED A 12.6MM VTICM5_12.6; -12.50/4.0/073 (SPHERE/CYLINDER/AXIS) IMPLANTABLE COLLAMER LENS INTO THE PATIENT'S LEFT EYE (OS). IT WAS REPORTED THAT THE LENS WAS REMOVED AND REPLACED WITH A SHORTER LENGTH LENS DUE TO SLIGHT ANGLE CLOSURE. Manufacturer Narrative: B5- " THE REPORTER INDICATED THAT THE SURGEON IMPLANTED A 12.6MM VTICM5_12.…	-12.50/4.0/073	OS	Other Health Care Professional	07/01/2022	2022
https://www.accessdata.fda.gov/scripts/cdrh/cfdocs/cfMAUDE/Detail.CFM?MDRFOI__ID=15126914&pc=QCB	2023826-2022-02500		Injury	STAAR SURGICAL COMPANY	2022-07-28 04:00:00	QCB	IMPLANTABLE COLLAMER LENS (ICL)	Adverse Event Without Identified Device or Use Problem	Appropriate Clinical Signs, Symptoms, Conditions Term / Code Not Available	P030016	Event Description: THE REPORTER INDICATED THAT THE SURGEON IMPLANTED A 12.6MM VTICM5_12.6; -11.00/2.5/108 (SPHERE/CYLINDER/AXIS) IMPLANTABLE COLLAMER LENS INTO THE PATIENT'S RIGHT EYE (OD). IT WAS REPORTED THAT THE LENS WAS EXCHANGED WITH A SHORTER LENGTH LENS DUE TO SLIGHT ANGLE CLOSURE. ATTEMPTS TO OBTAIN ADDITIONAL INFORMATION HAVE NOT BEEN SUCCESSFUL. IF ADDITIONAL INFORMATION IS RECEIVED A S…	-11.00/2.5/108	OD	Other Health Care Professional	07/01/2022	2022
https://www.accessdata.fda.gov/scripts/cdrh/cfdocs/cfMAUDE/Detail.CFM?MDRFOI__ID=15135400&pc=QCB	2023826-2022-02453	2022-06-08 04:00:00	Injury	STAAR SURGICAL COMPANY	2022-07-29 04:00:00	QCB	IMPLANTABLE COLLAMER LENS (ICL)	Inadequacy of Device Shape and/or Size	Appropriate Clinical Signs, Symptoms, Conditions Term / Code Not Available	NA	Event Description: THE REPORTER INDICATED THAT A 13.2MM VTICM5_13.2 IMPLANTABLE COLLAMER LENS OF -6.5/1.0/84 (SPHERE/CYLINDER/AXIS) WAS IMPLANTED INTO THE PATIENT'S RIGHT EYE (OD) ON (B)(6) 2022. EXCESSIVE VAULT AND NARROW ANGLES WAS OBSERVED, LENS REMAINS IMPLANTED. IT WAS REPORTED THAT THE CAUSE OF EVENT IS UNKNOWN AND THAT THE DEVICE DID NOT FAIL TO PERFORM AS INTENDED. IF ADDITIONAL INFORMATI…	-6.5/1.0/84	OD	Physician	07/01/2022	2022	45	Female
https://www.accessdata.fda.gov/scripts/cdrh/cfdocs/cfMAUDE/Detail.CFM?MDRFOI__ID=15163864&pc=QCB	2023826-2022-02586	2022-05-16 04:00:00	Injury	STAAR SURGICAL COMPANY	2022-08-04 04:00:00	QCB	IMPLANTABLE COLLAMER LENS (ICL)	Inadequacy of Device Shape and/or Size	Appropriate Clinical Signs, Symptoms, Conditions Term / Code Not Available	P030016	Event Description: THE REPORTER INDICATED THAT A 12.6MM VTICMO12.6 IMPLANTABLE COLLAMER LENS OF -16.5/+2.5/090 (SPHERE/CYLINDER/AXIS) WAS IMPLANTED INTO THE PATIENT'S RIGHT EYE (OD) ON (B)(6) 2022. ON (B)(6) 2022 THE LENS WAS EXCHANGED FOR A SHORTER LENGTH LENS DUE TO EXCESSIVE VAULT AND UNREACTIVE/FIXED PUPIL. THE EXCHANGE DID NOT RESOLVE THE PROBLEM. Manufacturer Narrative: B3 - CORRECTED TO: D…	-16.5/+2.5/090	OD	Physician	07/05/2022	2022	24	Male
https://www.accessdata.fda.gov/scripts/cdrh/cfdocs/cfMAUDE/Detail.CFM?MDRFOI__ID=15164320&pc=QCB	2023826-2022-02587		Injury	STAAR SURGICAL COMPANY	2022-08-04 04:00:00	QCB	IMPLANTABLE COLLAMER LENS (ICL)	No Apparent Adverse Event	Appropriate Clinical Signs, Symptoms, Conditions Term / Code Not Available	P030016	Event Description: THE REPORTER INDICATED THAT A 12.1MM VTICMO12.1 IMPLANTABLE COLLAMER LENS OF -16.0/+2.50/90 (SPHERE/CYLINDER/AXIS) WAS IMPLANTED INTO THE PATIENT'S RIGHT EYE (OD) ON (B)(6) 2022 AS A REPLACEMENT LENS TO ADDRESS EXCESSIVE VAULT AND UNREACTIVE/FIXED PUPIL. IT WAS REPORTED THAT THE LENS DID NOT RESOLVE THE PROBLEM, THE REPORTER STATED " PUPIL DID NOT CONSTRICT EVEN AFTER REPLACING…	-16.0/+2.50/90	OD	Physician	07/05/2022	2022		Male
https://www.accessdata.fda.gov/scripts/cdrh/cfdocs/cfMAUDE/Detail.CFM?MDRFOI__ID=15182874&pc=QCB	2023826-2022-02466	2022-04-23 04:00:00	Injury	STAAR SURGICAL COMPANY	2022-08-08 04:00:00	QCB	IMPLANTABLE COLLAMER LENS (ICL)	Off-Label Use; Inadequacy of Device Shape and/or Size	Appropriate Clinical Signs, Symptoms, Conditions Term / Code Not Available	P030016	Event Description: THE REPORTER INDICATED THAT THE SURGEON IMPLANTED A 13.2MM VTICMO13.2, -09.0/1.5/070 (SPHERE/CYLINDER/AXIS), IMPLANTABLE COLLAMER LENS INTO THE PATIENT'S LEFT EYE (OS) ON (B)(6) 2022. THE LENS WAS REPLACED WITH A SHORTER LENGTH LENS DUE TO SIGNIFICANT REDUCTION OF IRIDO-CORNEAL ANGLES AND EXCESSIVE VAULT ON (B)(6) 2022. THIS RESOLVED THE PROBLEM. CAUSE OF THE EVENT IS REPORTED …	-09.0/1.5/070	OS	Physician	07/18/2022	2022	29	Female
https://www.accessdata.fda.gov/scripts/cdrh/cfdocs/cfMAUDE/Detail.CFM?MDRFOI__ID=15182892&pc=QCB	2023826-2022-02467	2022-04-23 04:00:00	Injury	STAAR SURGICAL COMPANY	2022-08-08 04:00:00	QCB	IMPLANTABLE COLLAMER LENS (ICL)	Off-Label Use; Inadequacy of Device Shape and/or Size	Appropriate Clinical Signs, Symptoms, Conditions Term / Code Not Available	P030016	Event Description: THE REPORTER INDICATED THAT THE SURGEON IMPLANTED A 13.2 MM VTICMO13.2, -09.0/1.5/095 (SPHERE/CYLINDER/AXIS), IMPLANTABLE COLLAMER LENS INTO THE PATIENT'S RIGHT EYE (OD) ON (B)(6) 2022. THE LENS WAS REPLACED WITH A SHORTER LENGTH LENS DUE TO SIGNIFICANT REDUCTION OF IRIDO-CORNEAL ANGLES AND EXCESSIVE VAULT ON (B)(6) 2022. THIS RESOLVED THE PROBLEM. CAUSE OF THE EVENT IS REPORTE…	-09.0/1.5/095	OD	Physician	07/18/2022	2022	29	Female
https://www.accessdata.fda.gov/scripts/cdrh/cfdocs/cfMAUDE/Detail.CFM?MDRFOI__ID=15225753&pc=QCB	2023826-2022-02565	2022-07-06 04:00:00	Injury	STAAR SURGICAL COMPANY	2022-08-15 04:00:00	QCB	IMPLANTABLE COLLAMER LENS (ICL)	Inadequacy of Device Shape and/or Size	Appropriate Clinical Signs, Symptoms, Conditions Term / Code Not Available	P030016	Event Description: THE REPORTER INDICATED THAT THE SURGEON IMPLANTED A 13.2MM VTICMO13.2, -16.5/1.0/40 (SPHERE/CYLINDER/AXIS), IMPLANTABLE COLLAMER LENS INTO THE PATIENT'S LEFT EYE (OS) ON (B)(6) 2022. THE LENS WAS REMOVED AND REPLACED WITH A SHORTER LENGTH LENS DUE TO SIGNIFICANT REDUCTION OF IRIDO-CORNEAL ANGLES AND EXCESSIVE VAULT ON (B)(6) 2022. THIS RESOLVED THE PROBLEM.CAUSE OF THE EVENT IS…	-16.5/1.0/40	OS	Physician	07/27/2022	2022	26	Female
https://www.accessdata.fda.gov/scripts/cdrh/cfdocs/cfMAUDE/Detail.CFM?MDRFOI__ID=15225754&pc=QCB	2023826-2022-02564	2022-07-06 04:00:00	Injury	STAAR SURGICAL COMPANY	2022-08-15 04:00:00	QCB	IMPLANTABLE COLLAMER LENS (ICL)	Inadequacy of Device Shape and/or Size	Appropriate Clinical Signs, Symptoms, Conditions Term / Code Not Available	P030016	Event Description: THE REPORTER INDICATED THAT THE SURGEON IMPLANTED A 13.2MM VTICMO13.2, -17.5/3.0/143 (SPHERE/CYLINDER/AXIS), IMPLANTABLE COLLAMER LENS INTO THE PATIENT'S RIGHT EYE (OD) ON (B)(6) 2022. THE LENS WAS EXPLANTED ON (B)(6) 2022 TO SIGNIFICANT REDUCTION OF IRIDO-CORNEAL ANGLES AND EXCESSIVE VAULT. IN A SECOND SURGERY ON (B)(6) 2022 A SHORTER LENGTH LENS WAS IMPLANTED. THIS RESOLVED T…	-17.5/3.0/143	OD	Physician	07/27/2022	2022	26	Female
https://www.accessdata.fda.gov/scripts/cdrh/cfdocs/cfMAUDE/Detail.CFM?MDRFOI__ID=15227460&pc=QCB	2023826-2022-02766	2022-07-14 04:00:00	Injury	STAAR SURGICAL COMPANY	2022-08-15 04:00:00	QCB	IMPLANTABLE COLLAMER LENS (ICL)	Off-Label Use; Device Dislodged or Dislocated	Appropriate Clinical Signs, Symptoms, Conditions Term / Code Not Available	P030016	Event Description: THE REPORTER INDICATED THAT THE SURGEON IMPLANTED A 13.2MM VTICMO13.2; -15.5/3.0/083 (SPHERE/CYLINDER/AXIS) IMPLANTABLE COLLAMER LENS INTO THE PATIENT'S RIGHT EYE (OD) ON (B)(6) 2021. THE PATIENT EXPERIENCED LENS ROTATION AND COMPLAINED OF DECREASED VISION. THE LENS WAS REPOSITIONED ON (B)(6) 2022 BUT THIS DID NOT RESOLVE THE PROBLEM. ON (B)(6) 2022 THE LENS WAS EXCHANGED WITH …	-15.5/3.0/083	OD	Physician	08/10/2022	2022	19	Male
https://www.accessdata.fda.gov/scripts/cdrh/cfdocs/cfMAUDE/Detail.CFM?MDRFOI__ID=15245958&pc=QCB	2023826-2022-02734	2022-07-08 04:00:00	Injury	STAAR SURGICAL COMPANY	2022-08-17 04:00:00	QCB	IMPLANTABLE COLLAMER LENS (ICL)	Off-Label Use; Inadequacy of Device Shape and/or Size	Appropriate Clinical Signs, Symptoms, Conditions Term / Code Not Available	P030016	Event Description: THE REPORTER INDICATED THE SURGEON IMPLANTED A 12.1MM VTICMO12.1 IMPLANTABLE COLLAMER LENS, -06.50/+2.0/090 (SPHERE/CYLINDER/AXIS), IN THE PATIENTS RIGHT EYE (OD), ON (B)(6) 2022. THE LENS WAS EXPLANTED ON (B)(6) 2022 DUE TO EXCESSIVE VAULTING AND SHALLOW ANTERIOR CHAMBER. THE PROBLEM WAS RESOLVED. ANOTHER ICL LENS WAS NOT IMPLANTED. THE CAUSE OF THE EVENT WAS UNKNOWN. Manufact…	-06.50/+2.0/090	OD	Physician	07/26/2022	2022	30	Female
https://www.accessdata.fda.gov/scripts/cdrh/cfdocs/cfMAUDE/Detail.CFM?MDRFOI__ID=15272155&pc=QCB	2023826-2022-02845	2022-05-05 04:00:00	Injury	STAAR SURGICAL COMPANY	2022-08-22 04:00:00	QCB	IMPLANTABLE COLLAMER LENS (ICL)	Inadequacy of Device Shape and/or Size	Appropriate Clinical Signs, Symptoms, Conditions Term / Code Not Available	P030016	Event Description: THE REPORTER INDICATED THAT THE SURGEON IMPLANTED A 13.2MM VTICMO13.2, -12.5/2.0/107 (SPHERE/CYLINDER/AXIS) IMPLANTABLE COLLAMER LENS INTO THE PATIENT'S LEFT EYE (OS) ON (B)(6) 2022. ON (B)(6) 2022 THE LENS WAS EXCHANGED WITH A SHORTER LENGTH LENS DUE TO EXCESSIVE VAULT AND SIGNIFICANT REDUCTION OF IRIDO-CORNEAL ANGLES. THIS EXCHANGE RESOLVED THE PROBLEM. THE CAUSE OF THE EVENT…	-12.5/2.0/107	OS	Physician	07/25/2022	2022	33	Female
https://www.accessdata.fda.gov/scripts/cdrh/cfdocs/cfMAUDE/Detail.CFM?MDRFOI__ID=15272166&pc=QCB	2023826-2022-02846	2022-05-05 04:00:00	Injury	STAAR SURGICAL COMPANY	2022-08-22 04:00:00	QCB	IMPLANTABLE COLLAMER LENS (ICL)	Inadequacy of Device Shape and/or Size	Appropriate Clinical Signs, Symptoms, Conditions Term / Code Not Available	P030016	Event Description: THE REPORTER INDICATED THAT THE SURGEON IMPLANTED A 13.2MM VTICMO13.2, -10.5/1.5/067 (SPHERE/CYLINDER/AXIS) IMPLANTABLE COLLAMER LENS INTO THE PATIENT'S RIGHT EYE (OD) ON (B)(6)2022. ON (B)(6) 2022 THE LENS WAS EXCHANGED WITH A SHORTER LENGTH LENS DUE TO EXCESSIVE VAULT AND SIGNIFICANT REDUCTION OF IRIDO-CORNEAL ANGLES. THIS EXCHANGE RESOLVED THE PROBLEM. THE CAUSE OF THE EVENT…	-10.5/1.5/067	OD	Physician	07/25/2022	2022	33	Female
https://www.accessdata.fda.gov/scripts/cdrh/cfdocs/cfMAUDE/Detail.CFM?MDRFOI__ID=15296635&pc=QCB	2023826-2022-02790		Malfunction	STAAR SURGICAL COMPANY	2022-08-25 04:00:00	QCB	IMPLANTABLE COLLAMER LENS (ICL)	No Apparent Adverse Event	Appropriate Clinical Signs, Symptoms, Conditions Term / Code Not Available	P030016	Event Description: THE REPORTER INDICATED THE SURGEON IMPLANTED A 12.6MM VTICMO12.6 IMPLANTABLE COLLAMER LENS, IN THE PATIENTS RIGHT EYE (OD), ON (B)(6) 2022. THE PATIENT COMPLAINED OF DOUBLE IMAGES. THE LENS REMAINED IMPLANTED. ADDITIONAL INFORMATION HAS BEEN REQUESTED BUT NONE HAS BEEN FORTHCOMING. Manufacturer Narrative: B5: THE LENS DIOPTER IS -14.50/+2.5/109 (SPHERE/CYLINDER/AXIS). THE METRI…	-14.50/+2.5/109	OD	Physician	08/02/2022	2022		Male
https://www.accessdata.fda.gov/scripts/cdrh/cfdocs/cfMAUDE/Detail.CFM?MDRFOI__ID=15299561&pc=QCB	2023826-2022-02923		Malfunction	STAAR SURGICAL COMPANY	2022-08-26 04:00:00	QCB	IMPLANTABLE COLLAMER LENS (ICL)	Adverse Event Without Identified Device or Use Problem	Appropriate Clinical Signs, Symptoms, Conditions Term / Code Not Available	P030016	Event Description: THE REPORTER INDICATED THAT A 13.2MM, TMICL13.2, -13.50/1.00/090 (SPHERE/CYLINDER/AXIS) IMPLANTABLE COLLAMER LENS WAS IMPLANTED INTO THE PATIENTS LEFT EYE (OS) ON (B)(6) 2021. THE PATIENT EXPERIENCED IRIS TRANSILLUMINATION, LENS REMAINS IMPLANTED. CAUSE OF EVENT WAS REPORTED TO BE THE DEVICE. IF ADDITIONAL INFORMATION IS RECEIVED A SUPPLEMENTAL MEDWATCH REPORT WILL BE SUBMITTED…	-13.50/1.00/090	OS	Physician	07/27/2022	2022		Female
https://www.accessdata.fda.gov/scripts/cdrh/cfdocs/cfMAUDE/Detail.CFM?MDRFOI__ID=15307290&pc=QCB	2023826-2022-02887	2022-07-18 04:00:00	Injury	STAAR SURGICAL COMPANY	2022-08-26 04:00:00	QCB	IMPLANTABLE COLLAMER LENS (ICL)	Off-Label Use; Inadequacy of Device Shape and/or Size	Appropriate Clinical Signs, Symptoms, Conditions Term / Code Not Available	P030016	Event Description: THE REPORTER INDICATED THAT A 12.6MM VTICMO 12.6 IMPLANTABLE COLLAMER LENS OF -12.5/3.0/089 (SPHERE/CYLINDER/AXIS) WAS IMPLANTED INTO THE PATIENT'S LEFT EYE(OS) ON (B)(6) 2022. ON (B)(6) 2022 THE LENS WAS EXPLANTED DUE TO EXCESSIVE VAULT AND SIGNIFICANT REDUCTION OF IRIDO-CORNEAL ANGLES. REPORTEDLY THE PROBLEM WAS RESOLVED. CAUSE REPORTED AS UNKNOWN. Manufacturer Narrative: H3:…	-12.5/3.0/089	OS	Physician	07/28/2022	2022	23	Female
https://www.accessdata.fda.gov/scripts/cdrh/cfdocs/cfMAUDE/Detail.CFM?MDRFOI__ID=15307425&pc=QCB	2023826-2022-02888	2022-07-18 04:00:00	Injury	STAAR SURGICAL COMPANY	2022-08-26 04:00:00	QCB	IMPLANTABLE COLLAMER LENS (ICL)	Off-Label Use; Inadequacy of Device Shape and/or Size	Appropriate Clinical Signs, Symptoms, Conditions Term / Code Not Available	P030016	Event Description: THE REPORTER INDICATED THAT A 12.6MM VTICMO 12.6 IMPLANTABLE COLLAMER LENS OF -13.0/2.0/094 (SPHERE/CYLINDER/AXIS) WAS IMPLANTED INTO THE PATIENT'S RIGHT EYE (OD) ON (B)(6) 2022. ON (B)(6) 2022 THE LENS WAS EXPLANTED DUE TO EXCESSIVE VAULT AND SIGNIFICANT REDUCTION OF IRIDO-CORNEAL ANGLES. REPORTEDLY THE PROBLEM WAS RESOLVED. CAUSE REPORTED AS UNKNOWN. Manufacturer Narrative: (…	-13.0/2.0/094	OD	Physician	07/28/2022	2022	23	Female
https://www.accessdata.fda.gov/scripts/cdrh/cfdocs/cfMAUDE/Detail.CFM?MDRFOI__ID=15307870&pc=QCB	2023826-2022-02791		Malfunction	STAAR SURGICAL COMPANY	2022-08-28 04:00:00	QCB	IMPLANTABLE COLLAMER LENS (ICL)	No Apparent Adverse Event	Appropriate Clinical Signs, Symptoms, Conditions Term / Code Not Available	P030016	Event Description: THE REPORTER INDICATED THE SURGEON IMPLANTED A 12.6MM VTICM5_12.6 IMPLANTABLE COLLAMER LENS, IN THE PATIENTS LEFT EYE (OS), ON (B)(6) 2022. THE PATIENT COMPLAINED OF DOUBLE IMAGES. THE LENS REMAINED IMPLANTED. ADDITIONAL INFORMATION HAS BEEN REQUESTED BUT NONE HAS BEEN FORTHCOMING. Manufacturer Narrative: B5: THE LENS DIOPTER IS -14.00/+3.0/088 (SPHERE/CYLINDER/AXIS). THE METRI…	-14.00/+3.0/088	OS	Physician	08/02/2022	2022		Male
https://www.accessdata.fda.gov/scripts/cdrh/cfdocs/cfMAUDE/Detail.CFM?MDRFOI__ID=15362594&pc=QCB	2023826-2022-02683	2022-07-13 04:00:00	Malfunction	STAAR SURGICAL COMPANY	2022-09-06 04:00:00	QCB	IMPLANTABLE COLLAMER LENS (ICL)	Inadequacy of Device Shape and/or Size	Appropriate Clinical Signs, Symptoms, Conditions Term / Code Not Available	P030016	Event Description: THE REPORTER INDICATED THAT A 13.2MM VTICM5 13.2 IMPLANTABLE COLLAMER LENS COULD NOT BE PLACED BEHIND THE IRIS IN THE LEFT EYE (OS). ON 13-JUL-2022 THE LENS WAS IMPLANTED AND REMOVED INTRA-OPERATIVELY. NO NEW LENS WAS IMPLANTED AND THE CAUSE IS REPORTED AS UNKNOWN. NO FURTHER INFORMATION HAS BEEN PROVIDED. ATTEMPTS TO OBTAIN ADDITIONAL INFORMATION HAVE NOT BEEN SUCCESSFUL. IF A…	-8.0/5.5/078	OS	Physician	07/14/2022	2022		Female
https://www.accessdata.fda.gov/scripts/cdrh/cfdocs/cfMAUDE/Detail.CFM?MDRFOI__ID=15384326&pc=QCB	2023826-2022-03043		Injury	STAAR SURGICAL COMPANY	2022-09-08 04:00:00	QCB	IMPLANTABLE COLLAMER LENS (ICL)	Inadequacy of Device Shape and/or Size	Appropriate Clinical Signs, Symptoms, Conditions Term / Code Not Available	P030016	Event Description: THE REPORTER INDICATED THAT A 12.6MM, VTICM5_12.6, -5.00/1.5/064 (SPHERE/CYLINDER/AXIS) IMPLANTABLE COLLAMER LENS WAS IMPLANTED INTO THE PATIENTS' RIGHT EYE (OD) IN JUNE OF 2021. PER REPORTER PATIENT HAD A HIGH VAULT AT THE FOLLOW UP VISIT AND THE CLINIC DECIDED TO MONITOR PATIENT. LENS REMAINS IMPLANTED AND DOCTOR WANTS TO EXPLANT/EXCHANGE LENS DUE TO THE EXCESSIVE VAULT WHICH…	-5.00/1.5/064	OD	Physician	08/09/2022	2022
https://www.accessdata.fda.gov/scripts/cdrh/cfdocs/cfMAUDE/Detail.CFM?MDRFOI__ID=15384329&pc=QCB	2023826-2022-03044		Injury	STAAR SURGICAL COMPANY	2022-09-08 04:00:00	QCB	IMPLANTABLE COLLAMER LENS (ICL)	Inadequacy of Device Shape and/or Size	Appropriate Clinical Signs, Symptoms, Conditions Term / Code Not Available	P030016	Event Description: THE REPORTER INDICATED THAT A 12.6MM, VTICM5_12.6, -5.50/2.5/122 (SPHERE/CYLINDER/AXIS) IMPLANTABLE COLLAMER LENS WAS IMPLANTED INTO THE PATIENTS' LEFT EYE (OS) IN (B)(6) OF 2021. PER REPORTER PATIENT HAD A HIGH VAULT AT THE FOLLOW UP VISIT AND THE CLINIC DECIDED TO MONITOR PATIENT. LENS REMAINS IMPLANTED AND DOCTOR WANTS TO EXPLANT/EXCHANGE LENS DUE TO THE EXCESSIVE VAULT WHIC…	-5.50/2.5/122	OS	Physician	08/09/2022	2022
https://www.accessdata.fda.gov/scripts/cdrh/cfdocs/cfMAUDE/Detail.CFM?MDRFOI__ID=15391767&pc=QCB	2023826-2022-03038	2022-07-08 04:00:00	Injury	STAAR SURGICAL COMPANY	2022-09-09 04:00:00	QCB	IMPLANTABLE COLLAMER LENS (ICL)	Inadequacy of Device Shape and/or Size	Appropriate Clinical Signs, Symptoms, Conditions Term / Code Not Available	P030016	Event Description: THE REPORTER INDICATED THAT A 12.6MM, VTICM5_12.6, -12.5/4.0/74 (SPHERE/CYLINDER/AXIS) IMPLANTABLE COLLAMER LENS WAS IMPLANTED INTO THE PATIENTS LEFT EYE (OS) ON (B)(6) 2022. ON (B)(6) 2022 THE LENS WAS EXPLANTED DUE TO EXCESSIVE VAULT AND UNREACTIVE (FIXED) PUPIL. IT WAS REPORTED THAT THE PROBLEM DID NOT RESOLVE, FOR STATUS OF THE EYE (SIGNS/SYMPTOMS): PUPIL REMAINED MID-DILAT…	-12.5/4.0/74	OS	Physician	08/12/2022	2022	22	Male
https://www.accessdata.fda.gov/scripts/cdrh/cfdocs/cfMAUDE/Detail.CFM?MDRFOI__ID=15423441&pc=QCB	2023826-2022-03074	2022-08-13 04:00:00	Injury	STAAR SURGICAL COMPANY	2022-09-14 04:00:00	QCB	IMPLANTABLE COLLAMER LENS (ICL)	Inadequacy of Device Shape and/or Size	Appropriate Clinical Signs, Symptoms, Conditions Term / Code Not Available	P030016	Event Description: THE REPORTER INDICATED THAT A 13.2MM VTICMO 13.2 IMPLANTABLE COLLAMER LENS OF -10.0/2.0/090 (SPHERE/CYLINDER/AXIS) WAS IMPLANTED INTO THE PATIENT'S RIGHT EYE (OD) ON (B)(6) 2022. EXCESSIVE VAULT AND SIGNIFICANT REDUCTION OF IRIDO-CORNEAL ANGLES WAS OBSERVED. ON (B)(6) 2022 THE LENS WAS EXPLANTED AND ON THE SAME DAY DIFFERENT SURGERY A REPLACEMENT LENS OF SHORTER LENGTH WAS IMPL…	-10.0/2.0/090	OD	Physician	08/18/2022	2022	32	Female
https://www.accessdata.fda.gov/scripts/cdrh/cfdocs/cfMAUDE/Detail.CFM?MDRFOI__ID=15428728&pc=QCB	2023826-2022-03096	2022-08-11 04:00:00	Injury	STAAR SURGICAL COMPANY	2022-09-15 04:00:00	QCB	IMPLANTABLE COLLAMER LENS (ICL)	Inadequacy of Device Shape and/or Size	Appropriate Clinical Signs, Symptoms, Conditions Term / Code Not Available	P030016	Event Description: THE REPORTER INDICATED THAT THE SURGEON IMPLANTED A 13.2MM VTICMO13.2 IMPLANTABLE COLLAMER LENS OF DIOPTER -13.5/+2.5/109 INTO THE PATIENT'S RIGHT EYE (OD) ON (B)(6) 2022. THE LENS WAS EXCHANGED ON (B)(6) 2022 FOR A SHORTER LENGTH LENS DUE TO EXCESSIVE VAULT AND SIGNIFICANT REDUCTION OF IRIDO-CORNEAL ANGLES. THIS RESOLVED THE PROBLEM. CAUSE WAS REPORTED AS UNKNOWN. Manufacturer…	-13.5/+2.5/109	OD	Physician	08/22/2022	2022	25	Female
https://www.accessdata.fda.gov/scripts/cdrh/cfdocs/cfMAUDE/Detail.CFM?MDRFOI__ID=15442924&pc=QCB	2023826-2022-03086	2022-08-16 04:00:00	Injury	STAAR SURGICAL COMPANY	2022-09-17 04:00:00	QCB	IMPLANTABLE COLLAMER LENS (ICL)	Inadequacy of Device Shape and/or Size	Appropriate Clinical Signs, Symptoms, Conditions Term / Code Not Available	P030016	Event Description: THE REPORTER INDICATED THAT A 13.7MM VTICMO 13.7 IMPLANTABLE COLLAMER LENS OF -7.5/1.0/091 (SPHERE/CYLINDER/AXIS) WAS IMPLANTED INTO THE PATIENT'S LEFT EYE (OS) ON (B)(6) 2022. EXCESSIVE VAULT AND SIGNIFICANT REDUCTION OF IRIDO-CORNEAL ANGLES; AND PIGMENT DISPERSION WAS OBSERVED. ON (B)(6) 2022 THE LENS WAS EXCHANGED FOR A SHORTER LENGTH LENS AND THE PROBLEM WAS RESOLVED. CAUSE…	-7.5/1.0/091	OS	Physician	08/29/2022	2022	31	Female
https://www.accessdata.fda.gov/scripts/cdrh/cfdocs/cfMAUDE/Detail.CFM?MDRFOI__ID=15477263&pc=QCB	2023826-2022-03280	2022-09-10 04:00:00	Injury	STAAR SURGICAL COMPANY	2022-09-24 04:00:00	QCB	IMPLANTABLE COLLAMER LENS (ICL)	Inadequacy of Device Shape and/or Size	Appropriate Clinical Signs, Symptoms, Conditions Term / Code Not Available	P030016	Event Description: THE REPORTER INDICATED THAT THE SURGEON IMPLANTED A 13.2MM VTICMO13.2; -7.0/2.0/094 (SPHERE/CYLINDER/AXIS) IMPLANTABLE COLLAMER LENS INTO THE PATIENT'S LEFT EYE (OS) ON (B)(6) 2022. THE PATIENT EXPERIENCED EXCESSIVE VAULTING; SIGNIFICANT REDUCTION OF IRIDO-CORNEAL ANGLES. ON (B)(6) 2022 THE LENS WAS EXPLANTED. ON THIS SAME DATE A REPLACEMENT LENS OF A SHORTER LENGTH LENS AND TH…	-7.0/2.0/094	OS	Physician	09/20/2022	2022	36	Female
https://www.accessdata.fda.gov/scripts/cdrh/cfdocs/cfMAUDE/Detail.CFM?MDRFOI__ID=15498727&pc=QCB	2023826-2022-03326	2022-08-25 04:00:00	Injury	STAAR SURGICAL COMPANY	2022-09-28 04:00:00	QCB	IMPLANTABLE COLLAMER LENS (ICL)	Inadequacy of Device Shape and/or Size	Appropriate Clinical Signs, Symptoms, Conditions Term / Code Not Available	P030016	Event Description: THE REPORTER INDICATED THE SURGEON IMPLANTED A 13.2MM VTICM5_13.2 IMPLANTABLE COLLAMER LENS, -12.00/+1.5/091 (SPHERE/CYLINDER/AXIS), INTO THE PATIENTS RIGHT EYE (OD) ON (B)(6) 2020. THE LENS WAS REPORTED AS EXCESSIVE VAULTING, SIGNIFICANT REDUCTION OF IRIDO-CORNEAL ANGLES, PIGMENT DISPERSION, CORECTOPIA AND PERIPHERAL ANTERIOR SYNECHIAE (PAS) (DEVELOPING IN MULTIPLE AREAS). THE…	-12.00/+1.5/091	OD	Physician	08/31/2022	2022	29	Male
https://www.accessdata.fda.gov/scripts/cdrh/cfdocs/cfMAUDE/Detail.CFM?MDRFOI__ID=15506245&pc=QCB	2023826-2022-03327	2022-08-25 04:00:00	Injury	STAAR SURGICAL COMPANY	2022-09-29 04:00:00	QCB	IMPLANTABLE COLLAMER LENS (ICL)	Inadequacy of Device Shape and/or Size	Appropriate Clinical Signs, Symptoms, Conditions Term / Code Not Available	P030016	Event Description: THE REPORTER INDICATED THE SURGEON IMPLANTED A 13.2MM VTICM5_13.2 IMPLANTABLE COLLAMER LENS, -11.50/+0.5/086 (SPHERE/CYLINDER/AXIS), INTO THE PATIENTS LEFT EYE (OS) ON 25-AUG-2022. THE LENS WAS REPORTED AS EXCESSIVE VAULTING, SIGNIFICANT REDUCTION OF IRIDO-CORNEAL ANGLES, PIGMENT DISPERSION, CORECTOPIA AND PERIPHERAL ANTERIOR SYNECHIAE (PAS) (DEVELOPING IN MULTIPLE AREAS). THE …	-11.50/+0.5/086	OS	Physician	08/31/2022	2022	29	Male
https://www.accessdata.fda.gov/scripts/cdrh/cfdocs/cfMAUDE/Detail.CFM?MDRFOI__ID=15506488&pc=QCB	2023826-2022-03330	2022-01-12 05:00:00	Injury	STAAR SURGICAL COMPANY	2022-09-29 04:00:00	QCB	IMPLANTABLE COLLAMER LENS (ICL)	Inadequacy of Device Shape and/or Size; Device Dislodged or Dislocated	Appropriate Clinical Signs, Symptoms, Conditions Term / Code Not Available	P030016	Event Description: THE REPORTER INDICATED THE SURGEON IMPLANTED A 13.2MM VTICM5_13.2 IMPLANTABLE COLLAMER LENS, -09.50/+2.5/080 (SPHERE/CYLINDER/AXIS) INTO THE PATIENTS LEFT EYE (OS) ON (B)(6) 2022. THE LENS WAS EXPLANTED ON (B)(6) 2022 DUE TO LOW VAULTING, LENS ROTATION AND PERMANENT LOSS OF BCVA. THE LENS WAS REPOSITIONED BUT THE PROBLEM WAS NOT RESOLVED, SO THE LENS WAS REMOVED. THE LENS WAS R…	-09.50/+2.5/080	OS	Physician	09/15/2022	2022	25	Male
https://www.accessdata.fda.gov/scripts/cdrh/cfdocs/cfMAUDE/Detail.CFM?MDRFOI__ID=15540750&pc=QCB	2023826-2022-03399	2022-07-17 04:00:00	Injury	STAAR SURGICAL COMPANY	2022-10-04 04:00:00	QCB	IMPLANTABLE COLLAMER LENS (ICL)	Adverse Event Without Identified Device or Use Problem	Appropriate Clinical Signs, Symptoms, Conditions Term / Code Not Available	P030016	Event Description: THE REPORTER INDICATED THAT A 13.2MM VTICMO13.2 -10.50/1.0/087 (SPHERE/CYLINDER/AXIS) IMPLANTABLE COLLAMER LENS WAS IMPLANTED INTO THE PATIENT'S LEFT EYE (OS) ON (B)(6) 2022. ON (B)(6) 2022 THE LENS WAS EXPLANTED DUE TO SIGNIFICANT REDUCTION OF IRIDO-CORNEAL ANGLES AND THE PROBLEM RESOLVED. CAUSE OF EVENT WAS UNKNOWN. Manufacturer Narrative: (B)(4). NO SIMILAR COMPLAINT TYPE EV…	-10.50/1.0/087	OS	Physician	09/05/2022	2022	26	Female
https://www.accessdata.fda.gov/scripts/cdrh/cfdocs/cfMAUDE/Detail.CFM?MDRFOI__ID=15555994&pc=QCB	2023826-2022-03514		Malfunction	STAAR SURGICAL COMPANY	2022-10-06 04:00:00	QCB	IMPLANTABLE COLLAMER LENS (ICL)	Adverse Event Without Identified Device or Use Problem	Appropriate Clinical Signs, Symptoms, Conditions Term / Code Not Available	P030016	Event Description: THE REPORTER INDICATED THAT A 13.2MM, VTICM5_13.2, -7.50/1.0/95 (SPHERE/CYLINDER/AXIS) IMPLANTABLE COLLAMER LENS WAS IMPLANTED INTO THE PATIENTS RIGHT EYE (OD) ON (B)(6) 2022 AS A REPLACEMENT LENS TO ADDRESS LOW VAULT. IT WAS REPORTED THAT THE VAULT ISSUE RESOLVED BUT FOR SATUS OF THE EYE (SIGNS/SYMPTOMS) THE REPORTER STATED " MILD RESIDUAL CYL." ADDITIONAL INFORMATION HAS BEEN…	-7.50/1.0/95	OD	Physician	09/06/2022	2022		Female
https://www.accessdata.fda.gov/scripts/cdrh/cfdocs/cfMAUDE/Detail.CFM?MDRFOI__ID=15559517&pc=QCB	2023826-2022-03526	2022-05-11 04:00:00	Injury	STAAR SURGICAL COMPANY	2022-10-07 04:00:00	QCB	IMPLANTABLE COLLAMER LENS (ICL)	Inadequacy of Device Shape and/or Size	Appropriate Clinical Signs, Symptoms, Conditions Term / Code Not Available	P030016	Event Description: THE REPORTER INDICATED THAT THE SURGEON IMPLANTED A 12.6MM VTICMO12.6 IMPLANTABLE COLLAMER LENS OF DIOPTER -13.5/+1.0/063 INTO THE PATIENT'S LEFT EYE (OS) ON (B)(6) 2022. THE LENS WAS EXCHANGED ON (B)(6) 2022 FOR A SHORTER LENGTH LENS DUE TO EXCESSIVE VAULT AND SIGNIFICANT REDUCTION OF IRIDO-CORNEAL ANGLES. THIS RESOLVED THE PROBLEM. CAUSE WAS REPORTED AS UNKNOWN. Manufacturer …	-13.5/+1.0/063	OS	Physician	09/08/2022	2022	31	Female
https://www.accessdata.fda.gov/scripts/cdrh/cfdocs/cfMAUDE/Detail.CFM?MDRFOI__ID=15572321&pc=QCB	2023826-2022-03409	2022-09-15 04:00:00	Injury	STAAR SURGICAL COMPANY	2022-10-10 04:00:00	QCB	IMPLANTABLE COLLAMER LENS (ICL)	Off-Label Use; Inadequacy of Device Shape and/or Size	Appropriate Clinical Signs, Symptoms, Conditions Term / Code Not Available	P030016	Event Description: THE REPORTER INDICATED THAT THE SURGEON IMPLANTED A 12.6MM VTICMO12.6, -06.0/0.5/110 (SPHERE/CYLINDER/AXIS), IMPLANTABLE COLLAMER LENS INTO THE PATIENT'S RIGHT EYE (OD) ON (B)(6) 2022. THE LENS WAS REPLACED WITH A SHORTER LENGTH LENS DUE TO IRIDO-CORNEAL ANGLES AND EXCESSIVE VAULT ON (B)(6) 2022. THIS RESOLVED THE PROBLEM. CAUSE OF THE EVENT IS REPORTED AS UNKNOWN. Manufacturer…	-06.0/0.5/110	OD	Physician	09/19/2022	2022	27	Female
https://www.accessdata.fda.gov/scripts/cdrh/cfdocs/cfMAUDE/Detail.CFM?MDRFOI__ID=15587255&pc=QCB	2023826-2022-03410	2022-09-15 04:00:00	Injury	STAAR SURGICAL COMPANY	2022-10-12 04:00:00	QCB	IMPLANTABLE COLLAMER LENS (ICL)	Off-Label Use; Inadequacy of Device Shape and/or Size	Appropriate Clinical Signs, Symptoms, Conditions Term / Code Not Available	P030016	Event Description: THE REPORTER INDICATED THAT THE SURGEON IMPLANTED A 12.6MM VTICMO12.6, -06.5/0.5/094 (SPHERE/CYLINDER/AXIS), IMPLANTABLE COLLAMER LENS INTO THE PATIENT'S LEFT EYE (OS) ON (B)(6) 2022. THE LENS WAS REPLACED WITH A SHORTER LENGTH LENS DUE TO SIGNIFICANT REDUCTION OF IRIDO-CORNEAL ANGLES AND EXCESSIVE VAULT ON (B)(6) 2022. THIS RESOLVED THE PROBLEM. CAUSE OF THE EVENT IS REPORTED …	-06.5/0.5/094	OS	Physician	09/19/2022	2022	27	Female
https://www.accessdata.fda.gov/scripts/cdrh/cfdocs/cfMAUDE/Detail.CFM?MDRFOI__ID=15591803&pc=QCB	2023826-2022-03490	2021-09-22 04:00:00	Injury	STAAR SURGICAL COMPANY	2022-10-12 04:00:00	QCB	IMPLANTABLE COLLAMER LENS (ICL)	Inadequacy of Device Shape and/or Size	Appropriate Clinical Signs, Symptoms, Conditions Term / Code Not Available	P030016	Event Description: THE REPORTER INDICATED THE SURGEON IMPLANTED A 13.2MM VTICM5_13.2 IMPLANTABLE COLLAMER LENS, -03.50/+0.5/054 (SPHERE/CYLINDER/AXIS) INTO THE PATIENTS RIGHT EYE (OD) ON (B)(6) 2021. THE LENS WAS REPORTED AS LOW VAULTING AND REFRACTIVE CHANGE OVERTIME. THE LENS REMAINED IMPLANTED. THE CAUSE OF THE EVENT WAS UNKNOWN. ADDITIONAL INFORMATION HAS BEEN REQUESTED BUT NONE HAS BEEN FORT…	-03.50/+0.5/054	OD	Physician	09/21/2022	2022	31	Male
https://www.accessdata.fda.gov/scripts/cdrh/cfdocs/cfMAUDE/Detail.CFM?MDRFOI__ID=15611592&pc=QCB	2023826-2022-03643	2022-10-11 04:00:00	Injury	STAAR SURGICAL COMPANY	2022-10-14 04:00:00	QCB	IMPLANTABLE COLLAMER LENS (ICL)	Inadequacy of Device Shape and/or Size	Appropriate Clinical Signs, Symptoms, Conditions Term / Code Not Available	P030016	Event Description: THE REPORTER INDICATED THAT THE SURGEON IMPLANTED A 12.6MM VTICMO12.6; -12.0/1.0/087 (SPHERE/CYLINDER/AXIS) IMPLANTABLE COLLAMER LENS INTO THE PATIENT'S LEFT EYE (OS) ON (B)(6) 2022. THE PATIENT EXPERIENCED EXCESSIVE VAULTING; PIGMENT DISPERSION; SIGNIFICANT REDUCTION OF IRIDO-CORNEAL ANGLES. ON (B)(6) 2022 THE LENS WAS EXCHANGED WITH A SHORTER LENGTH LENS AND THIS RESOLVED THE…	-12.0/1.0/087	OS	Physician	10/11/2022	2022	25	Female
https://www.accessdata.fda.gov/scripts/cdrh/cfdocs/cfMAUDE/Detail.CFM?MDRFOI__ID=15620827&pc=QCB	2023826-2022-03491	2021-09-22 04:00:00	Injury	STAAR SURGICAL COMPANY	2022-10-18 04:00:00	QCB	IMPLANTABLE COLLAMER LENS (ICL)	Inadequacy of Device Shape and/or Size	Appropriate Clinical Signs, Symptoms, Conditions Term / Code Not Available	P030016	Event Description: THE REPORTER INDICATED THE SURGEON IMPLANTED A 13.2MM VTICM5_13.2 IMPLANTABLE COLLAMER LENS, -03.50/+0.5/099 (SPHERE/CYLINDER/AXIS) INTO THE PATIENTS LEFT EYE (OS) ON (B)(6) 2021. THE LENS WAS REPORTED AS LOW VAULTING AND REFRACTIVE CHANGE OVERTIME. THE LENS REMAINED IMPLANTED. THE CAUSE OF THE EVENT WAS UNKNOWN. ADDITIONAL INFORMATION HAS BEEN REQUESTED BUT NONE HAS BEEN FORTH…	-03.50/+0.5/099	OS	Physician	09/21/2022	2022	31	Male
https://www.accessdata.fda.gov/scripts/cdrh/cfdocs/cfMAUDE/Detail.CFM?MDRFOI__ID=15697250&pc=QCB	2023826-2022-03856	2022-09-10 04:00:00	Injury	STAAR SURGICAL COMPANY	2022-10-29 04:00:00	QCB	IMPLANTABLE COLLAMER LENS (ICL)	Inadequacy of Device Shape and/or Size	Appropriate Clinical Signs, Symptoms, Conditions Term / Code Not Available	P030016	Event Description: THE REPORTER INDICATED THAT A 13.2MM VTICMO 13.2 IMPLANTABLE COLLAMER LENS OF -10/00/3.0/13 (SPHERE/CYLINDER/AXIS) WAS IMPLANTED INTO THE PATIENT'S RIGHT EYE (OD) ON AN UNKNOWN DATE. VERY SHALLOW CHAMBER; SIGNIFICANT REDUCTION OF IRIDOCORNEAL ANGLES; PIGMENT DISPERSION WAS REPORTED. THE LENS REMAINS IMPLANTED. CAUSE REPORTED AS DEVICE. "OVER-SIZED LENS". Manufacturer Narrative:…	-10/00/3.0/13	OD	Physician	09/29/2022	2022		Female
https://www.accessdata.fda.gov/scripts/cdrh/cfdocs/cfMAUDE/Detail.CFM?MDRFOI__ID=15713892&pc=QCB	2023826-2022-03880	2022-09-03 04:00:00	Injury	STAAR SURGICAL COMPANY	2022-11-02 04:00:00	QCB	IMPLANTABLE COLLAMER LENS (ICL)	Inadequacy of Device Shape and/or Size	Appropriate Clinical Signs, Symptoms, Conditions Term / Code Not Available	P030016	Event Description: THE REPORTER INDICATED THE SURGEON IMPLANTED A 12.6MM VTICMO12.6 IMPLANTABLE COLLAMER LENS, -15.50/+2.5/089 (SPHERE/CYLINDER/AXIS) IN THE PATIENTS RIGHT EYE (OD) ON (B)(6) 2022. THE LENS WAS REMOVED ON (B)(6) 2022 DUE TO EXCESSIVE VAULTING, PIGMENT DISPERSION AND SIGNIFICANT REDUCTION OF IRIDO-CORNEAL ANGLES. THE LENS WAS REPLACED WITH A SHORTER LENS AND THE PROBLEM WAS RESOLVE…	-15.50/+2.5/089	OD	Physician	10/03/2022	2022	23	Male
https://www.accessdata.fda.gov/scripts/cdrh/cfdocs/cfMAUDE/Detail.CFM?MDRFOI__ID=15741084&pc=QCB	2023826-2022-03873	2022-08-01 04:00:00	Injury	STAAR SURGICAL COMPANY	2022-11-05 04:00:00	QCB	IMPLANTABLE COLLAMER LENS (ICL)	Misfocusing; Off-Label Use	Appropriate Clinical Signs, Symptoms, Conditions Term / Code Not Available	P030016	Event Description: THE REPORTER INDICATED THAT A 12.6MM VTICMO 12.6 IMPLANTABLE COLLAMER LENS OF -7.0/2.0/113 (SPHERE/CYLINDER/AXIS) WAS IMPLANTED INTO THE PATIENT'S RIGHT EYE (OD) ON (B)(6) 2022. ON (B)(6)2022 THE LENS WAS EXCHANGED FOR A SAME MODEL; SIZE LENS BUT DIFFERENT POWER DUE TO REFRACTIVE SURPRISE. THE REPLACEMENT LENS RESOLVED THE PROBLEM. CAUSE REPORTED AS UNKNOWN. "FOR THE FIRST TIME…	-7.0/2.0/113	OD	Physician	10/07/2022	2022	20	Female
https://www.accessdata.fda.gov/scripts/cdrh/cfdocs/cfMAUDE/Detail.CFM?MDRFOI__ID=15741086&pc=QCB	2023826-2022-03874	2022-08-01 04:00:00	Injury	STAAR SURGICAL COMPANY	2022-11-05 04:00:00	QCB	IMPLANTABLE COLLAMER LENS (ICL)	Misfocusing; Off-Label Use	Appropriate Clinical Signs, Symptoms, Conditions Term / Code Not Available	P030016	Event Description: THE REPORTER INDICATED THAT A 12.6MM VTICMO 12.6 IMPLANTABLE COLLAMER LENS OF -6.5/3.5/088 (SPHERE/CYLINDER/AXIS) WAS IMPLANTED INTO THE PATIENT'S LEFT EYE (OS) ON (B)(6) 2022. ON (B)(6) 2022 THE LENS WAS EXCHANGED FOR A SAME MODEL; SIZE LENS BUT DIFFERENT POWER DUE TO REFRACTIVE SURPRISE. THE REPLACEMENT LENS RESOLVED THE PROBLEM. CAUSE REPORTED AS UNKNOWN. "FOR THE FIRST TIME…	-6.5/3.5/088	OS	Physician	10/07/2022	2022	20	Female
https://www.accessdata.fda.gov/scripts/cdrh/cfdocs/cfMAUDE/Detail.CFM?MDRFOI__ID=15765835&pc=QCB	2023826-2022-04075	2022-09-09 04:00:00	Injury	STAAR SURGICAL COMPANY	2022-11-09 05:00:00	QCB	IMPLANTABLE COLLAMER LENS (ICL)	Off-Label Use; Inadequacy of Device Shape and/or Size	Appropriate Clinical Signs, Symptoms, Conditions Term / Code Not Available	P030016	Event Description: THE REPORTER INDICATED THAT THE SURGEON IMPLANTED A 12.6MM VTICMO12.6 IMPLANTABLE COLLAMER LENS OF DIOPTER -7.0/+2.0/089 INTO THE PATIENT'S RIGHT EYE (OD) ON (B)(6) 2022. THE LENS WAS EXCHANGED ON (B)(6) 2022 FOR A SHORTER LENGTH LENS DUE TO EXCESSIVE VAULT AND SIGNIFICANT REDUCTION OF IRIDO-CORNEAL ANGLES. THIS RESOLVED THE PROBLEM. CAUSE OF EVENT REPORTED AS UNKNOWN. Manufact…	-7.0/+2.0/089	OD	Physician	10/11/2022	2022	32	Female
https://www.accessdata.fda.gov/scripts/cdrh/cfdocs/cfMAUDE/Detail.CFM?MDRFOI__ID=15767691&pc=QCB	2023826-2022-04076	2022-09-02 04:00:00	Injury	STAAR SURGICAL COMPANY	2022-11-10 05:00:00	QCB	IMPLANTABLE COLLAMER LENS (ICL)	Off-Label Use; Inadequacy of Device Shape and/or Size	Appropriate Clinical Signs, Symptoms, Conditions Term / Code Not Available	P030016	Event Description: THE REPORTER INDICATED THAT THE SURGEON IMPLANTED A 12.6MM VTICMO12.6 IMPLANTABLE COLLAMER LENS OF DIOPTER -7.5/+2.0/092 INTO THE PATIENT'S LEFT EYE (OS) ON (B)(6) 2022. THE LENS WAS EXCHANGED ON (B)(6) 2022 FOR A SHORTER LENGTH LENS DUE TO EXCESSIVE VAULT AND SIGNIFICANT REDUCTION OF IRIDO-CORNEAL ANGLES. THIS RESOLVED THE PROBLEM. CAUSE OF EVENT REPORTED AS UNKNOWN. Manufactu…	-7.5/+2.0/092	OS	Physician	10/11/2022	2022	32	Female
https://www.accessdata.fda.gov/scripts/cdrh/cfdocs/cfMAUDE/Detail.CFM?MDRFOI__ID=15802020&pc=QCB	2023826-2022-04128	2022-09-16 04:00:00	Injury	STAAR SURGICAL COMPANY	2022-11-15 05:00:00	QCB	IMPLANTABLE COLLAMER LENS (ICL)	Inadequacy of Device Shape and/or Size	Appropriate Clinical Signs, Symptoms, Conditions Term / Code Not Available	P030016	Event Description: THE REPORTER INDICATED THAT THE SURGEON IMPLANTED A 12.6MM VTICM5_12.6; -13.5/3.5/095 (SPHERE/CYLINDER/AXIS) IMPLANTABLE COLLAMER LENS INTO THE PATIENT'S RIGHT EYE (OD) ON (B)(6) 2022. THE PATIENT EXPERIENCED EXCESSIVE VAULTING; SIGNIFICANT REDUCTION OF IRIDO-CORNEAL ANGLES. ON (B)(6) 2022 THE LENS WAS EXPLANTED AND LATER ON THIS SAME DATE REPLACED WITH A SHORTER LENGTH LENS. T…	-13.5/3.5/095	OD	Physician	11/04/2022	2022	34	Female
https://www.accessdata.fda.gov/scripts/cdrh/cfdocs/cfMAUDE/Detail.CFM?MDRFOI__ID=15810683&pc=QCB	2023826-2022-04011	2022-10-02 04:00:00	Malfunction	STAAR SURGICAL COMPANY	2022-11-16 05:00:00	QCB	IMPLANTABLE COLLAMER LENS (ICL)	No Apparent Adverse Event	Appropriate Clinical Signs, Symptoms, Conditions Term / Code Not Available	P030016	Event Description: THE REPORTER INDICATED THAT A 12.6 MM VTICMO 12.6 IMPLANTABLE COLLAMER LENS OF -7.50/1.0/097 (SPHERE/CYLINDER/AXIS) WAS IMPLANTED INTO THE PATIENTS RIGHT EYE (OD) ON (B)(6) 2022. DOCTOR FOUND A FILAMENTOUS FOREIGN BODY WAS FOUND ON THE LENS DURING SURGERY AND WAS REMOVED WITH FORCEPS AND IMPLANTED IN THE EYE. THE LENS REMAINS IMPLANTED. CAUSE WAS REPORTED AS UNKNOWN. Manufactur…	-7.50/1.0/097	OD	Physician	10/18/2022	2022	26	Female
https://www.accessdata.fda.gov/scripts/cdrh/cfdocs/cfMAUDE/Detail.CFM?MDRFOI__ID=15921105&pc=QCB	2023826-2022-04453	2022-11-07 05:00:00	Malfunction	STAAR SURGICAL COMPANY	2022-12-05 05:00:00	QCB	IMPLANTABLE COLLAMER LENS (ICL)	Inadequacy of Device Shape and/or Size	Appropriate Clinical Signs, Symptoms, Conditions Term / Code Not Available	P030016	Event Description: THE REPORTER INDICATED THAT THE SURGEON IMPLANTED A 13.7MM VTICM5_13.7; -13.5/1.0/060 (SPHERE/CYLINDER/AXIS) IMPLANTABLE COLLAMER LENS INTO THE PATIENT'S RIGHT EYE (OD) ON (B)(6)2022. THE SURGEON REPORTS EXCESSIVE VAULTING AND NARROW ANGLES. LENS REMAINS IMPLANTED. THE CAUSE OF THE EVENT WAS REPORTED AS THE DEVICE. Manufacturer Narrative: (B)(4). TYPE OF INVESTIGATION: (B)(4) -…	-13.5/1.0/060	OD	Physician	11/11/2022	2022	21	Female
https://www.accessdata.fda.gov/scripts/cdrh/cfdocs/cfMAUDE/Detail.CFM?MDRFOI__ID=15924103&pc=QCB	2023826-2022-04457	2022-06-15 04:00:00	Injury	STAAR SURGICAL COMPANY	2022-12-06 05:00:00	QCB	IMPLANTABLE COLLAMER LENS (ICL)	Inadequacy of Device Shape and/or Size	Appropriate Clinical Signs, Symptoms, Conditions Term / Code Not Available	P030016	Event Description: THE REPORTER INDICATED THAT A 12.6MM VTICMO12.6 IMPLANTABLE COLLAMER LENS -11.50/2.0/113 (SPHERE/CYLINDER/AXIS) WAS IMPLANTED INTO THE PATIENT'S RIGHT EYE (OD) ON (B)(6) 2022. ON (B)(6) 2022 THE LENS WAS EXCHANGD FOR A SAME LENGTH LENS THAT WAS IMPLANTED VERTICALLY DUE TO EXCESSIVE VAULT AND SIGNIFICANT REDUCTION OF IRIDO-CORNEAL ANGELS. THE EXCHANGE RESOLVED THE PROBLEM. CAUSE…	-11.50/2.0/113	OD	Physician	11/07/2022	2022	28	Female
https://www.accessdata.fda.gov/scripts/cdrh/cfdocs/cfMAUDE/Detail.CFM?MDRFOI__ID=15929837&pc=QCB	2023826-2022-04461		Injury	STAAR SURGICAL COMPANY	2022-12-07 05:00:00	QCB	IMPLANTABLE COLLAMER LENS (ICL)	Inadequacy of Device Shape and/or Size	Appropriate Clinical Signs, Symptoms, Conditions Term / Code Not Available	P030016	Event Description: THE REPORTER INDICATED THAT A 13.2MM VTICM513.2 -7.00/2.5/114 (SPHERE/CYLINDER/AXIS) IMPLANTABLE COLLAMER LENS WAS IMPLANTED INTO THE PATIENTS RIGHT EYE (OD) ON (B)(6) 2021. ON (B)(6) 2022 THE LENS WAS EXCHANGED FOR A SHORTER LENGTH LENS DUE TO EXCESSIVE VAULT AND SIGNIFICANT REDUCTION OF IRIDOCORNEAL ANGLES. THE EXCHANGE RESOLVED THE PROBLEM. CAUSE OF EVENT WAS UNKNOWN. Manufa…	-7.00/2.5/114	OD	Physician	11/09/2022	2022		Female
https://www.accessdata.fda.gov/scripts/cdrh/cfdocs/cfMAUDE/Detail.CFM?MDRFOI__ID=15952729&pc=QCB	2023826-2022-04358	2022-11-10 05:00:00	Injury	STAAR SURGICAL COMPANY	2022-12-09 05:00:00	QCB	IMPLANTABLE COLLAMER LENS (ICL)	Adverse Event Without Identified Device or Use Problem	Appropriate Clinical Signs, Symptoms, Conditions Term / Code Not Available	P030016	Event Description: THE REPORTER INDICATED THE SURGEON IMPLANTED A 12.6MM VTICMO12.6 IMPLANTABLE COLLAMER LENS, -09.00/+1.5/073 (SPHERE/CYLINDER/AXIS), IN THE PATIENTS LEFT EYE (OS), ON (B)(6) 2022. THE LENS WAS REMOVED ON (B)(6) 2022 DUE TO THE PATIENT COULD NOT DIFFERENTIATE BETWEEN COLORS AFTER THE LENS WAS IMPLANTED (COLOR BLIND). THE PROBLEM WAS RESOLVED. THE CAUSE OF THE EVENT WAS UNKNOWN. M…	-09.00/+1.5/073	OS	Physician	11/17/2022	2022	31	Female
https://www.accessdata.fda.gov/scripts/cdrh/cfdocs/cfMAUDE/Detail.CFM?MDRFOI__ID=15954065&pc=QCB	2023826-2022-04355	2021-06-01 04:00:00	Injury	STAAR SURGICAL COMPANY	2022-12-09 05:00:00	QCB	IMPLANTABLE COLLAMER LENS (ICL)	Inadequacy of Device Shape and/or Size	Appropriate Clinical Signs, Symptoms, Conditions Term / Code Not Available	P030016	Event Description: THE REPORTER INDICATED THE SURGEON IMPLANTED A 13.2MM VTICM5_13.2 IMPLANTABLE COLLAMER LENS, -10.50/+2.0/090 (SPHERE/CYLINDER/AXIS), IN THE PATIENTS RIGHT EYE (OD), ON (B)(6) 2021. THE LENS WAS EXPLANTED ON (B)(6) 2021 DUE TO EXCESSIVE VAULTING AND SIGNIFICANT REDUCTION OF IRIDO-CORNEAL ANGLES. THE LENS WAS REPLACED WITH A SHORTER LENS AND THE PROBLEM WAS RESOLVED. Manufacturer…	-10.50/+2.0/090	OD	Physician	11/16/2022	2022	21	Male
https://www.accessdata.fda.gov/scripts/cdrh/cfdocs/cfMAUDE/Detail.CFM?MDRFOI__ID=15954096&pc=QCB	2023826-2022-04356	2021-06-01 04:00:00	Injury	STAAR SURGICAL COMPANY	2022-12-09 05:00:00	QCB	IMPLANTABLE COLLAMER LENS (ICL)	Inadequacy of Device Shape and/or Size	Appropriate Clinical Signs, Symptoms, Conditions Term / Code Not Available	P030016	Event Description: THE REPORTER INDICATED THE SURGEON IMPLANTED A 13.2MM VTICM5_13.2 IMPLANTABLE COLLAMER LENS, -12.00/+2.5/090 (SPHERE/CYLINDER/AXIS), IN THE PATIENTS LEFT EYE (OS), ON (B)(6) 2021. THE LENS WAS EXPLANTED ON (B)(6) 2021 DUE TO EXCESSIVE VAULTING AND SIGNIFICANT REDUCTION OF IRIDO-CORNEAL ANGLES. THE LENS WAS REPLACED WITH A SHORTER LENS AND THE PROBLEM WAS RESOLVED. THE CAUSE OF …	-12.00/+2.5/090	OS	Physician	11/16/2022	2022	21	Male
https://www.accessdata.fda.gov/scripts/cdrh/cfdocs/cfMAUDE/Detail.CFM?MDRFOI__ID=15954434&pc=QCB	2023826-2022-04357	2022-11-10 05:00:00	Injury	STAAR SURGICAL COMPANY	2022-12-09 05:00:00	QCB	IMPLANTABLE COLLAMER LENS (ICL)	Adverse Event Without Identified Device or Use Problem	Appropriate Clinical Signs, Symptoms, Conditions Term / Code Not Available	P030016	Event Description: THE REPORTER INDICATED THE SURGEON IMPLANTED A 12.6MM VTICMO12.6 IMPLANTABLE COLLAMER LENS, -09.50/+1.0/090 (SPHERE/CYLINDER/AXIS), IN THE PATIENTS RIGHT EYE (OD), ON (B)(6) 2022. THE LENS WAS REMOVED ON (B)(6) 2022 DUE TO THE PATIENT COULD NOT DIFFERENTIATE BETWEEN COLORS AFTER THE LENS WAS IMPLANTED (COLOR BLIND). THE PROBLEM WAS RESOLVED. THE CAUSE OF THE EVENT WAS UNKNOWN. …	-09.50/+1.0/090	OD	Physician	11/17/2022	2022	31	Female
https://www.accessdata.fda.gov/scripts/cdrh/cfdocs/cfMAUDE/Detail.CFM?MDRFOI__ID=15955851&pc=QCB	2023826-2022-04521	2022-11-23 05:00:00	Malfunction	STAAR SURGICAL COMPANY	2022-12-09 05:00:00	QCB	IMPLANTABLE COLLAMER LENS (ICL)	Misfocusing	Appropriate Clinical Signs, Symptoms, Conditions Term / Code Not Available	P030016	Event Description: THE REPORTER INDICATED THAT THE SURGEON IMPLANTED A 13.2MM VTICMO13.2; -10.5/+0.5/106 (SPHERE/CYLINDER/AXIS) IMPLANTABLE COLLAMER LENS INTO THE PATIENT'S RIGHT EYE (OD) ON (B)(6)2022. IT WAS REPORTED THAT THE PATIENT HAS "WRONG REFRACTION" (OVER CORRECTION). LENS REMAINS IMPLANTED. THE CAUSE OF THE EVENT WAS REPORTED AS USER ERROR AND NOTED THE DEVICE FAILED TO PERFORM AS INTEN…	-10.5/+0.5/106	OD	Physician	11/24/2022	2022	28	Female
https://www.accessdata.fda.gov/scripts/cdrh/cfdocs/cfMAUDE/Detail.CFM?MDRFOI__ID=16035460&pc=QCB	2023826-2022-04559	2022-11-10 05:00:00	Injury	STAAR SURGICAL COMPANY	2022-12-22 05:00:00	QCB	IMPLANTABLE COLLAMER LENS (ICL)	Inadequacy of Device Shape and/or Size	Appropriate Clinical Signs, Symptoms, Conditions Term / Code Not Available	P030016	Event Description: THE REPORTER INDICATED THAT THE SURGEON IMPLANTED A 13.2MM VTICM5_13.2, -10.0/1.5/002 (SPHERE/CYLINDER/AXIS), IMPLANTABLE COLLAMER LENS INTO THE PATIENT'S RIGHT EYE (OD) ON (B)(6) 2022. THE LENS WAS EXPLANTED ON (B)(6) 2022 DUE TO EXCESSIVE VAULT. IN A SECOND SURGERY ON (B)(6) 2022 A SHORTER LENGTH LENS WAS IMPLANTED. THIS RESOLVED THE PROBLEM. CAUSE OF THE EVENT IS REPORTED AS…	-10.0/1.5/002	OD	Physician	11/29/2022	2022	35	Female
https://www.accessdata.fda.gov/scripts/cdrh/cfdocs/cfMAUDE/Detail.CFM?MDRFOI__ID=16035468&pc=QCB	2023826-2022-04570	2022-11-01 04:00:00	Injury	STAAR SURGICAL COMPANY	2022-12-22 05:00:00	QCB	IMPLANTABLE COLLAMER LENS (ICL)	Off-Label Use; Inadequacy of Device Shape and/or Size	Appropriate Clinical Signs, Symptoms, Conditions Term / Code Not Available	P030016	Event Description: THE REPORTER INDICATED THAT THE SURGEON IMPLANTED A 12.1MM VTICMO12.1, -4.0/1.5/090 (SPHERE/CYLINDER/AXIS), IMPLANTABLE COLLAMER LENS INTO THE PATIENT'S LEFT EYE (OS) ON (B)(6) 2022. THE LENS WAS REPLACED WITH A LONGER LENGTH LENS DUE TO LOW VAULT ON (B)(6) 2022. THIS RESOLVED THE PROBLEM. CAUSE OF THE EVENT IS REPORTED AS UNKNOWN. Manufacturer Narrative: WEIGHT - UNK; ETHNICIT…	-4.0/1.5/090	OS	Physician	11/30/2022	2022	35	Female
https://www.accessdata.fda.gov/scripts/cdrh/cfdocs/cfMAUDE/Detail.CFM?MDRFOI__ID=16036914&pc=QCB	2023826-2022-04723		Injury	STAAR SURGICAL COMPANY	2022-12-22 05:00:00	QCB	IMPLANTABLE COLLAMER LENS (ICL)	Adverse Event Without Identified Device or Use Problem	Appropriate Clinical Signs, Symptoms, Conditions Term / Code Not Available	P030016	Event Description: THE REPORTER INDICATED THAT THE SURGEON IMPLANTED A 12.6MM VTICMO12.6; -15.5/+1.5/90 (SPHERE/CYLINDER/AXIS) IMPLANTABLE COLLAMER LENS INTO THE PATIENT'S LEFT EYE (OS) AS A REPLACEMENT LENS; ON (B)(6) 2022. THE SURGEON REPORTS ENDOTHELIAL CELLS OF 674 CELLS/MM2. LENS REMAINS IMPLANTED. Manufacturer Narrative: (B)(4). CLAIM# (B)(4). Manufacturer Narrative: H6: DEVICE HISTORY RECO…	-15.5/+1.5/90	OS	Physician	11/28/2022	2022		Male
https://www.accessdata.fda.gov/scripts/cdrh/cfdocs/cfMAUDE/Detail.CFM?MDRFOI__ID=16075815&pc=QCB	2023826-2022-04651	2022-11-01 04:00:00	Injury	STAAR SURGICAL COMPANY	2022-12-29 05:00:00	QCB	IMPLANTABLE COLLAMER LENS (ICL)	Inadequacy of Device Shape and/or Size	Appropriate Clinical Signs, Symptoms, Conditions Term / Code Not Available	P030016	Event Description: THE REPORTER INDICATED THAT THE SURGEON IMPLANTED A 13.2MM VTICM5_13.2 IMPLANTABLE COLLAMER LENS OF DIOPTER -12.50/+1.0/095 INTO THE PATIENT'S RIGHT EYE (OD) ON (B)(6) 2022. THE LENS WAS EXPLANTED ON (B)(6) 2022 DUE TO EXCESSIVE VAULT. THIS RESOLVED THE PROBLEM. CAUSE WAS REPORTED AS UNKNOWN. Manufacturer Narrative: H3: DEVICE EVALUATION - LENS WAS RETURNED IN MICROCENTRIFUGE V…	-12.50/+1.0/095	OD	Physician	11/29/2022	2022	24	Male
https://www.accessdata.fda.gov/scripts/cdrh/cfdocs/cfMAUDE/Detail.CFM?MDRFOI__ID=16075857&pc=QCB	2023826-2022-04655	2022-09-08 04:00:00	Injury	STAAR SURGICAL COMPANY	2022-12-29 05:00:00	QCB	IMPLANTABLE COLLAMER LENS (ICL)	Inadequacy of Device Shape and/or Size	Appropriate Clinical Signs, Symptoms, Conditions Term / Code Not Available	P030016	Event Description: THE REPORTER INDICATED THAT THE SURGEON IMPLANTED A 13.2MM VTICMO13.2 IMPLANTABLE COLLAMER LENS OF DIOPTER -11.50/+2.5/094 INTO THE PATIENT'S LEFT EYE (OS) ON (B)(6) 2022. THE LENS WAS EXCHANGED ON (B)(6) 2022 FOR A LENS TWO SIZES SHORTER IN LENGTH. THE REPORTER STATED " LENS TOO BIG. SURGEON PREFERENCE CHANGE." THE PROBLEM WAS RESOLVED. Manufacturer Narrative: CLAIM # (B)(4).	-11.50/+2.5/094	OS	Physician	11/29/2022	2022	22	Female
https://www.accessdata.fda.gov/scripts/cdrh/cfdocs/cfMAUDE/Detail.CFM?MDRFOI__ID=16087544&pc=QCB	2023826-2022-04794	2022-12-21 05:00:00	Injury	STAAR SURGICAL COMPANY	2023-01-03 05:00:00	QCB	IMPLANTABLE COLLAMER LENS (ICL)	Adverse Event Without Identified Device or Use Problem	Appropriate Clinical Signs, Symptoms, Conditions Term / Code Not Available	P030016	Event Description: THE REPORTER INDICATED THAT THE SURGEON IMPLANTED A 12.1MM VTICM5_12.1; -10.50/+1.50/018 (SPHERE/CYLINDER/AXIS) IMPLANTABLE COLLAMER LENS INTO THE PATIENT'S LEFT EYE (OS) ON (B)(6)2022. THE SURGEON REPORTS AT ONE DAY POSTOPERATIVE; DR. NOTED IRIS PIGMENTATION ON THE LENS IN THE LEFT EYE. PATIENT WAS ALSO CONSIDERED A STEROID RESPONDER AND DOCTOR PUT THE PATIENT ON DIAMOX AND IO…	-10.50/+1.50/018	OS	Physician	12/22/2022	2022	26	Male
https://www.accessdata.fda.gov/scripts/cdrh/cfdocs/cfMAUDE/Detail.CFM?MDRFOI__ID=16099316&pc=QCB	2023826-2023-00063	2022-11-08 05:00:00	Injury	STAAR SURGICAL COMPANY	2023-01-04 05:00:00	QCB	IMPLANTABLE COLLAMER LENS (ICL)	Inadequacy of Device Shape and/or Size	Appropriate Clinical Signs, Symptoms, Conditions Term / Code Not Available	P030016	Event Description: THE REPORTER INDICATED THAT THE SURGEON IMPLANTED A 13.2MM VTICM5_13.2 IMPLANTABLE COLLAMER LENS OF DIOPTER -11.0/+3.5/002 INTO THE PATIENT'S RIGHT EYE (OD) ON (B)(6) 2022. THE LENS WAS EXCHANGED ON (B)(6) 2022 FOR A SHORTER LENGTH LENS DUE TO EXCESSIVE VAULT AND SIGNIFICANT REDUCTION OF IRIDO-CORNEAL ANGLES. THIS RESOLVED THE PROBLEM. CAUSE WAS REPORTED AS UNKNOWN. Manufacture…	-11.0/+3.5/002	OD	Physician	12/09/2022	2022	30	Female
https://www.accessdata.fda.gov/scripts/cdrh/cfdocs/cfMAUDE/Detail.CFM?MDRFOI__ID=16152680&pc=QCB	2023826-2023-00125	2022-12-13 05:00:00	Malfunction	STAAR SURGICAL COMPANY	2023-01-12 05:00:00	QCB	IMPLANTABLE COLLAMER LENS (ICL)	Inadequacy of Device Shape and/or Size	Appropriate Clinical Signs, Symptoms, Conditions Term / Code Not Available	P030016	Event Description: THE REPORTER INDICATED THAT A 13.2MM VTICMO 13.2 IMPLANTABLE COLLAMER LENS OF -17.50-3.0-054 (SPHERE/CYLINDER/AXIS) WAS IMPLANTED INTO THE PATIENTS LEFT EYE (OS) ON (B)(6) 2022. EXCESSIVE VAULT AND A TINY BIT OF PIGMENTATION ON THE ICL WAS OBSERVED. THE LENS REMAINS IMPLANTED. DOCTOR WILL WATCH THE PATIENT FOR NOW SINCE IOP AND VISION IS OPTIMAL. CAUSE REPORTED AS UNKNOWN, AND …	-17.50-3.0-054	OS	Physician	12/13/2022	2022		Male
https://www.accessdata.fda.gov/scripts/cdrh/cfdocs/cfMAUDE/Detail.CFM?MDRFOI__ID=16164430&pc=QCB	2023826-2023-00143		Malfunction	STAAR SURGICAL COMPANY	2023-01-13 05:00:00	QCB	IMPLANTABLE COLLAMER LENS (ICL)	Adverse Event Without Identified Device or Use Problem	Appropriate Clinical Signs, Symptoms, Conditions Term / Code Not Available	P030016	Event Description: THE REPORTER INDICATED THAT A 13.2MM VTICM5_13.2 -14.50/2.5/069 (SPHERE/CYLINDER/AXIS) IMPLANTABLE COLLAMER LENS WAS IMPLANTED INTO THE PATIENT'S LEFT EYE (OS) ON (B)(6) 2022 AS A REPLACEMENT LENS. FOR STATUS OF THE EYE (SIGNS/SYMPTOMS) THE REPORTER STATED " OS STILL A BIT SORE". PER UPDATED INFORMATION PATIENT IS HAPPY WITH VISION AND SORENESS HAS RESOLVED. Manufacturer Narrat…	-14.50/2.5/069	OS	Other Health Care Professional	12/14/2022	2022		Female
https://www.accessdata.fda.gov/scripts/cdrh/cfdocs/cfMAUDE/Detail.CFM?MDRFOI__ID=16165110&pc=QCB	2023826-2023-00136		Injury	STAAR SURGICAL COMPANY	2023-01-13 05:00:00	QCB	IMPLANTABLE COLLAMER LENS (ICL)	Device Dislodged or Dislocated	Appropriate Clinical Signs, Symptoms, Conditions Term / Code Not Available	P030016	Event Description: THE REPORTER INDICATED THAT A 13.2MM VTICM5 13.2 IMPLANTABLE COLLAMER LENS OF -12.00/2.0/092 (SPHERE/CYLINDER/AXIS) WAS IMPLANTED INTO THE PATIENT'S RIGHT EYE (OD) ON (B)(6) 2022. LENS ROTATION WAS OBSERVED. "THE LENS WAS REPOSITIONED TO 168 DEGREES BUT ICL BACK TO THE PRE-OP POSITION TWICE." ON (B)(6) 2022 THE LENS WAS EXPLANTED. CAUSE NOT REPORTED. AND IT IS NOTED THAT THE PR…	-12.00/2.0/092	OD	Physician	12/15/2022	2022		Male
https://www.accessdata.fda.gov/scripts/cdrh/cfdocs/cfMAUDE/Detail.CFM?MDRFOI__ID=16189408&pc=QCB	2023826-2023-00200	2022-09-30 04:00:00	Malfunction	STAAR SURGICAL COMPANY	2023-01-17 05:00:00	QCB	IMPLANTABLE COLLAMER LENS (ICL)	Adverse Event Without Identified Device or Use Problem	Appropriate Clinical Signs, Symptoms, Conditions Term / Code Not Available	P030016	Event Description: THE REPORTER INDICATED THAT THE SURGEON IMPLANTED AN IMPLANTABLE COLLAMER LENS INTO THE PATIENT'S EYE. THE SURGEON REPORTS BEFORE THE PROCEDURE; THE SUBJECTIVE REFRACTION ON THE OP WAS -6.0/-2.25/140; THE LENS WAS SUPPOSED TO CORRECT THE CYLINDER IN ITS ENTIRETY; WHILE THE POSTOPERATIVE SUBJECTIVE REFRACTION REMAINED +0.50/-1.50/178; SO A SIGNIFICANT PART OF THE ASTIGMATISM REM…	-6.0/-2.25/140	NA	Physician	12/19/2022	2022	28	Female
https://www.accessdata.fda.gov/scripts/cdrh/cfdocs/cfMAUDE/Detail.CFM?MDRFOI__ID=16200098&pc=QCB	2023826-2023-00232	2022-07-20 04:00:00	Injury	STAAR SURGICAL COMPANY	2023-01-18 05:00:00	QCB	IMPLANTABLE COLLAMER LENS (ICL)	Inadequacy of Device Shape and/or Size	Appropriate Clinical Signs, Symptoms, Conditions Term / Code Not Available	P030016	Event Description: THE REPORTER INDICATED THAT THE SURGEON IMPLANTED A 13.2MM VTICM5_13.2; -8.0/1.5/78 (SPHERE/CYLINDER/AXIS) IMPLANTABLE COLLAMER LENS INTO THE PATIENT'S LEFT EYE (OS) ON (B)(6) 2022. THE SURGEON REPORTS EXCESSIVE VAULTING AND SIGNIFICANT REDUCTION OF IRIDO-CORNEAL ANGLES. ON (B)(6) 2022 THE LENS WAS EXPLANTED. ON THIS SAME DATE THE LENS WAS REPLACED WITH A SHORTER LENGTH LENS AN…	-8.0/1.5/78	OS	Physician	01/11/2023	2023	30	Female
https://www.accessdata.fda.gov/scripts/cdrh/cfdocs/cfMAUDE/Detail.CFM?MDRFOI__ID=16256994&pc=QCB	2023826-2023-00324		Injury	STAAR SURGICAL COMPANY	2023-01-27 05:00:00	QCB	IMPLANTABLE COLLAMER LENS (ICL)	Adverse Event Without Identified Device or Use Problem	Appropriate Clinical Signs, Symptoms, Conditions Term / Code Not Available	P030016	Event Description: THE REPORTER INDICATED THAT A 12.1MM VTICM5 12.1 IMPLANTABLE COLLAMER LENS OF -10.00/1.5/081 (SPHERE/CYLINDER/AXIS) WAS IMPLANTED INTO THE PATIENT'S RIGHT EYE (OD) ON (B)(6) 2022. ON (B)(6)2022 THE LENS WAS REMOVED DUE TO NARROW ANGLES. IT WAS NOT REPLACED WITH ANOTHER LENS. IF ADDITIONAL INFORMATION IS RECEIVED A SUPPLEMENTAL MEDWATCH REPORT WILL BE SUBMITTED. Manufacturer Nar…	-10.00/1.5/081	OD	Physician	12/29/2022	2022
https://www.accessdata.fda.gov/scripts/cdrh/cfdocs/cfMAUDE/Detail.CFM?MDRFOI__ID=16273843&pc=QCB	2023826-2023-00371	2022-12-10 05:00:00	Malfunction	STAAR SURGICAL COMPANY	2023-01-31 05:00:00	QCB	IMPLANTABLE COLLAMER LENS (ICL)	Off-Label Use; Device Dislodged or Dislocated	Appropriate Clinical Signs, Symptoms, Conditions Term / Code Not Available	P030016	Event Description: THE REPORTER INDICATED THAT THE SURGEON IMPLANTED A 12.6MM VTICMO12.6; -16.5/3.0/090 (SPHERE/CYLINDER/AXIS) IMPLANTABLE COLLAMER LENS INTO THE PATIENT'S RIGHT EYE (OD) ON (B)(4) 2022. THE SURGEON REPORTS THE LENS HAD TORE DURING INJECTION/DELIVERY INTO THE EYE WITH LENS DISLOCATION/SUBLUXATION. IT WAS ADDITIONALLY NOTED THERE IS A PLANNED EXCHANGE DUE TO THE PATIENT EXPERIENCIN…	-16.5/3.0/090	OD	Physician	01/04/2023	2023	47	Female
https://www.accessdata.fda.gov/scripts/cdrh/cfdocs/cfMAUDE/Detail.CFM?MDRFOI__ID=16351463&pc=QCB	2023826-2023-00467	2022-11-05 04:00:00	Injury	STAAR SURGICAL COMPANY	2023-02-10 05:00:00	QCB	IMPLANTABLE COLLAMER LENS (ICL)	Adverse Event Without Identified Device or Use Problem	Appropriate Clinical Signs, Symptoms, Conditions Term / Code Not Available	P030016	Event Description: THE REPORTER INDICATED THAT A 13.2MM VTICMO13.2 -8.00/3.5/102 (SPHERE/CYLINDER/AXIS) IMPLANTABLE COLLAMER LENS WAS IMPLANTED INTO THE PATIENTS RIGHT EYE (OD) ON (B)(6) 2022. ON (B)(6) 2022 THE LENS WAS EXPLANTED DUE TO SIGNIFICANT REDUCTION OF ENDOTHELIAL CELL COUNT/LOSS. IT WAS REPORTED THAT THE PROBLEM RESOLVED. Manufacturer Narrative: HEALTH EFFECT- CLINICAL CODE 4581: SIGNI…	-8.00/3.5/102	OD	Physician	01/11/2023	2023	33	Female
https://www.accessdata.fda.gov/scripts/cdrh/cfdocs/cfMAUDE/Detail.CFM?MDRFOI__ID=16389094&pc=QCB	2023826-2023-00650	2023-02-02 05:00:00	Malfunction	STAAR SURGICAL COMPANY	2023-02-16 05:00:00	QCB	IMPLANTABLE COLLAMER LENS (ICL)	Inadequacy of Device Shape and/or Size	Appropriate Clinical Signs, Symptoms, Conditions Term / Code Not Available	P030016	Event Description: THE REPORTER INDICATED THAT THE SURGEON IMPLANTED A 13.2MM VTICM5_13.2; -6.00/1.0/161 (SPHERE/CYLINDER/AXIS) IMPLANTABLE COLLAMER LENS INTO THE PATIENT'S LEFT EYE (OS) ON (B)(6) 2023. THE SURGEON REPORTS THERE WAS EXCESSIVE VAULTING; SIGNIFICANT REDUCTION OF IRIDO-CORNEAL ANGLES; AND THE ANGLES ARE NARROW. LENS REMAINS IMPLANTED. THE SURGEON INDICATED THE PATIENT WILL BE MONITO…	-6.00/1.0/161	OS	Physician	02/08/2023	2023	30	Male
https://www.accessdata.fda.gov/scripts/cdrh/cfdocs/cfMAUDE/Detail.CFM?MDRFOI__ID=16389105&pc=QCB	2023826-2023-00649	2023-02-02 05:00:00	Malfunction	STAAR SURGICAL COMPANY	2023-02-16 05:00:00	QCB	IMPLANTABLE COLLAMER LENS (ICL)	Inadequacy of Device Shape and/or Size	Appropriate Clinical Signs, Symptoms, Conditions Term / Code Not Available	P030016	Event Description: THE REPORTER INDICATED THAT THE SURGEON IMPLANTED A 13.2MM VTICM5_13.2; -6.00/1.0/159 (SPHERE/CYLINDER/AXIS) IMPLANTABLE COLLAMER LENS INTO THE PATIENT'S RIGHT EYE (OD) ON (B)(6) 2023. THE SURGEON REPORTS THERE WAS EXCESSIVE VAULTING; SIGNIFICANT REDUCTION OF IRIDO-CORNEAL ANGLES; AND THE ANGLES ARE NARROW. LENS REMAINS IMPLANTED. THE SURGEON INDICATED THE PATIENT WILL BE MONIT…	-6.00/1.0/159	OD	Physician	02/08/2023	2023	30	Male
https://www.accessdata.fda.gov/scripts/cdrh/cfdocs/cfMAUDE/Detail.CFM?MDRFOI__ID=16390507&pc=QCB	2023826-2023-00594		Injury	STAAR SURGICAL COMPANY	2023-02-16 05:00:00	QCB	IMPLANTABLE COLLAMER LENS (ICL)	Inadequacy of Device Shape and/or Size	Appropriate Clinical Signs, Symptoms, Conditions Term / Code Not Available	P030016	Event Description: THE REPORTER INDICATED THAT A 13.2MM VTICM5 13.2 IMPLANTABLE COLLAMER LENS OF -6.00/5.0/088 (SPHERE/CYLINDER/AXIS) WAS IMPLANTED INTO THE PATIENT'S LEFT EYE (OS) ON (B)(6) 2022. EXCESSIVE VAULT WITH SIGNIFICANT REDUCTION OF IRIDO-CORNEAL ANGLES WAS OBSERVED. ON (B)(6) 2022 THE LENS WAS REMOVED AND ON THE SAME DAY DIFFERENT SURGERY A REPLACEMENT OF SHORTER LENGTH LENS WAS IMPLAN…	-6.00/5.0/088	OS	Physician	01/18/2023	2023		Male
https://www.accessdata.fda.gov/scripts/cdrh/cfdocs/cfMAUDE/Detail.CFM?MDRFOI__ID=16411457&pc=QCB	2023826-2023-00573		Injury	STAAR SURGICAL COMPANY	2023-02-21 05:00:00	QCB	IMPLANTABLE COLLAMER LENS (ICL)	Off-Label Use; No Apparent Adverse Event	Appropriate Clinical Signs, Symptoms, Conditions Term / Code Not Available	P030016	Event Description: THE REPORTER INDICATED THE SURGEON IMPLANTED A 12.6MM VTICM5_12.6 IMPLANTABLE COLLAMER LENS, -10.00/+2.0/111 (SPHERE/CYLINDER/AXIS) INTO THE PATIENTS RIGHT EYE (OD) ON (B)(6) 2022. THE PATIENT PRESENTED WITH A FIXED DILATED PUPIL POST-OP. THE ICL WAS IN GOOD POSITION AND IOP WAS WITHIN NORMAL LIMITS. THE LENS REMAINED IMPLANTED. THE CAUSE OF THE EVENT WAS UNKNOWN. Manufacturer …	-10.00/+2.0/111	OD	Physician	01/26/2023	2023		Female
https://www.accessdata.fda.gov/scripts/cdrh/cfdocs/cfMAUDE/Detail.CFM?MDRFOI__ID=16420139&pc=QCB	2023826-2023-00611	2023-01-18 05:00:00	Injury	STAAR SURGICAL COMPANY	2023-02-22 05:00:00	QCB	IMPLANTABLE COLLAMER LENS (ICL)	Appropriate Term/Code Not Available	Appropriate Clinical Signs, Symptoms, Conditions Term / Code Not Available	P030016	Event Description: THE REPORTER INDICATED THAT AN 13.2MM VTICMO 13.2 IMPLANTABLE COLLAMER LENS OF -16.00/2.0/086 (SPHERE/CYLINDER AXIS) WAS ATTEMPTED TO BE IMPLANTED ON (B)(6) 2023. "PATIENT PUPIL KEEP CONTRACTING." THE LENS WAS REMOVED AND A BACKUP LENS WAS IMPLANTED. NO PATIENT INJURY. Manufacturer Narrative: CLINICAL CODE 4581: "PATIENT PUPIL KEPT CONTRACTING". INVESTIGATION TYPE 4110: LENS WO…	-16.00/2.0/086	NA	Other Health Care Professional	01/31/2023	2023	31	Male
https://www.accessdata.fda.gov/scripts/cdrh/cfdocs/cfMAUDE/Detail.CFM?MDRFOI__ID=16507981&pc=QCB	2023826-2023-00839	2023-01-30 05:00:00	Injury	STAAR SURGICAL COMPANY	2023-03-08 05:00:00	QCB	IMPLANTABLE COLLAMER LENS (ICL)	Off-Label Use; Inadequacy of Device Shape and/or Size	Appropriate Clinical Signs, Symptoms, Conditions Term / Code Not Available	P030016	Event Description: THE REPORTER INDICATED THAT THE SURGEON IMPLANTED A 13.2M VTICMO13.2; -4.5/1.0/152 (SPHERE/CYLINDER/AXIS) IMPLANTABLE COLLAMER LENS INTO THE PATIENT'S RIGHT EYE (OD) ON (B)(6) 2023. THE SURGEON REPORTS EXCESSIVE VAULTING AND SIGNIFICANT REDUCTION OF IRIDO-CORNEAL ANGLES IN THE PATIENT. ON (B)(6) 2023 THE LENS WAS EXPLANTED AND THE PROBLEM WAS REPORTED AS NOT RESOLVED. ADDITIONA…	-4.5/1.0/152	OD	Physician	03/07/2023	2023	43	Male
https://www.accessdata.fda.gov/scripts/cdrh/cfdocs/cfMAUDE/Detail.CFM?MDRFOI__ID=16507984&pc=QCB	2023826-2023-00840	2023-01-30 05:00:00	Injury	STAAR SURGICAL COMPANY	2023-03-08 05:00:00	QCB	IMPLANTABLE COLLAMER LENS (ICL)	Off-Label Use; Inadequacy of Device Shape and/or Size	Appropriate Clinical Signs, Symptoms, Conditions Term / Code Not Available	P030016	Event Description: THE REPORTER INDICATED THAT THE SURGEON IMPLANTED A 13.2MM VTICMO13.2; -3.0/1.5/028 (SPHERE/CYLINDER/AXIS) IMPLANTABLE COLLAMER LENS INTO THE PATIENT'S LEFT EYE (OS) ON (B)(6) 2023. THE SURGEON REPORTS EXCESSIVE VAULTING AND SIGNIFICANT REDUCTION OF IRIDO-CORNEAL ANGLES IN THE PATIENT. ON (B)(6) 2023 THE LENS WAS EXPLANTED AND THE PROBLEM WAS REPORTED AS NOT RESOLVED. ADDITIONA…	-3.0/1.5/028	OS	Physician	03/07/2023	2023	43	Male
https://www.accessdata.fda.gov/scripts/cdrh/cfdocs/cfMAUDE/Detail.CFM?MDRFOI__ID=16519908&pc=QCB	2023826-2023-00815	2023-02-08 05:00:00	Injury	STAAR SURGICAL COMPANY	2023-03-10 05:00:00	QCB	IMPLANTABLE COLLAMER LENS (ICL)	Inadequacy of Device Shape and/or Size	Appropriate Clinical Signs, Symptoms, Conditions Term / Code Not Available	P030016	Event Description: THE REPORTER INDICATED THAT A 13.2MM VTICM5_13.2 -0.50/6.0/072 (SPHERE/CYLINDER/AXIS) IMPLANTABLE COLLAMER LENS WAS IMPLANTED INTO THE PATIENTS LEFT EYE (OS) ON (B)(6) 2022. THE PATIENT EXPERIENCED EXCESSIVE VAULT AND SIGNIFICANT REDUCTION OF IRIDOCORNEAL ANGLES, LENS REMAINS IMPLANTED. IF ADDITIONAL INFORMATION IS RECEIVED A SUPPLEMENTAL MEDWATCH REPORT WILL BE SUBMITTED. Manu…	-0.50/6.0/072	OS	Physician	02/10/2023	2023	26	Male
https://www.accessdata.fda.gov/scripts/cdrh/cfdocs/cfMAUDE/Detail.CFM?MDRFOI__ID=16519926&pc=QCB	2023826-2023-00814	2023-02-08 05:00:00	Injury	STAAR SURGICAL COMPANY	2023-03-10 05:00:00	QCB	IMPLANTABLE COLLAMER LENS (ICL)	Inadequacy of Device Shape and/or Size	Appropriate Clinical Signs, Symptoms, Conditions Term / Code Not Available	P030016	Event Description: THE REPORTER INDICATED THAT A 13.2MM VTICM5_13.2 -0.50/5.5/114 (SPHERE/CYLINDER/AXIS) IMPLANTABLE COLLAMER LENS WAS IMPLANTED INTO THE PATIENTS RIGHT EYE (OD) ON (B)(6) 2022. THE PATIENT EXPERIENCED EXCESSIVE VAULT AND SIGNIFICANT REDUCTION OF IRIDOCORNEAL ANGLES, LENS REMAINS IMPLANTED. IF ADDITIONAL INFORMATION IS RECEIVED A SUPPLEMENTAL MEDWATCH REPORT WILL BE SUBMITTED. Man…	-0.50/5.5/114	OD	Physician	02/10/2023	2023	26	Male
https://www.accessdata.fda.gov/scripts/cdrh/cfdocs/cfMAUDE/Detail.CFM?MDRFOI__ID=16532958&pc=QCB	2023826-2023-00889		Malfunction	STAAR SURGICAL COMPANY	2023-03-13 04:00:00	QCB	IMPLANTABLE COLLAMER LENS (ICL)	No Apparent Adverse Event	Appropriate Clinical Signs, Symptoms, Conditions Term / Code Not Available	P030016	Event Description: THE REPORTER INDICATED THAT THE SURGEON IMPLANTED A 13.2MM VTICMO13.2; -14.00/2.5/093 (SPHERE/CYLINDER/AXIS) IMPLANTABLE COLLAMER LENS INTO THE PATIENT'S RIGHT EYE (OD). THE SURGEON REPORTS THE PATIENT IS HAVING NEAR VISION PROBLEMS. LENS REMAINS IMPLANTED. ATTEMPTS TO OBTAIN ADDITIONAL INFORMATION HAVE NOT BEEN SUCCESSFUL. IF ADDITIONAL INFORMATION IS RECEIVED A SUPPLEMENTAL M…	-14.00/2.5/093	OD	Physician	02/16/2023	2023		Male
https://www.accessdata.fda.gov/scripts/cdrh/cfdocs/cfMAUDE/Detail.CFM?MDRFOI__ID=16550445&pc=QCB	2023826-2023-00956	2023-01-13 05:00:00	Injury	STAAR SURGICAL COMPANY	2023-03-15 04:00:00	QCB	IMPLANTABLE COLLAMER LENS (ICL)	Off-Label Use; Inadequacy of Device Shape and/or Size	Appropriate Clinical Signs, Symptoms, Conditions Term / Code Not Available	P030016	Event Description: THE REPORTER INDICATED THAT THE SURGEON IMPLANTED A 12.6MM VTICMO12.6; -9.5/1.0/072 (SPHERE/CYLINDER/AXIS) IMPLANTABLE COLLAMER LENS INTO THE PATIENT'S RIGHT EYE (OD) ON (B)(6) 2022. THE PATIENT EXPERIENCED SIGNIFICANT REDUCTION OF IRIDO-CORNEAL ANGLES. ON (B)(6) 2023 THE LENS WAS EXPLANTED AND THIS RESOLVED THE PROBLEM. THE CAUSE OF THE EVENT WAS REPORTED AS UNKNOWN. Manufactu…	-9.5/1.0/072	OD	Physician	03/14/2023	2023	28	Female
https://www.accessdata.fda.gov/scripts/cdrh/cfdocs/cfMAUDE/Detail.CFM?MDRFOI__ID=16603909&pc=QCB	2023826-2023-00974		Injury	STAAR SURGICAL COMPANY	2023-03-23 04:00:00	QCB	IMPLANTABLE COLLAMER LENS (ICL)	Inadequacy of Device Shape and/or Size	Appropriate Clinical Signs, Symptoms, Conditions Term / Code Not Available	P030016	Event Description: THE REPORTER INDICATED THE SURGEON IMPLANTED A 12.6MM VTICMO12.6 IMPLANTABLE COLLAMER LENS, -17.00/+2.5/095 (SPHERE/CYLINDER/AXIS), INTO THE PATIENTS LEFT EYE (OS) ON (B)(6) 2022. THE LENS WAS REMOVED ON (B)(6) 2023 DUE TO EXCESSIVE VAULTING AND SIGNIFICANT REDUCTION OF IRIDO-CORNEAL ANGLES. ADDITIONAL SURGERY WAS PERFORMED WITH THE ADDITION OF NEW PI. THE LENS WAS REPLACED WIT…	-17.00/+2.5/095	OS	Other Health Care Professional	02/24/2023	2023		Male
https://www.accessdata.fda.gov/scripts/cdrh/cfdocs/cfMAUDE/Detail.CFM?MDRFOI__ID=16633013&pc=QCB	2023826-2023-01099	2023-02-09 05:00:00	Injury	STAAR SURGICAL COMPANY	2023-03-28 04:00:00	QCB	IMPLANTABLE COLLAMER LENS (ICL)	Inadequacy of Device Shape and/or Size	Appropriate Clinical Signs, Symptoms, Conditions Term / Code Not Available	P030016	Event Description: THE REPORTER INDICATED THAT THE SURGEON IMPLANTED A 13.2MM VTICM5_13.2 IMPLANTABLE COLLAMER LENS OF DIOPTER -11.0/+1.5/134 INTO THE PATIENT'S RIGHT EYE (OD) ON (B)(6) 2023. EXCESSIVE VAULT AND SIGNIFICANT REDUCTION OF IRIDO-CORNEAL ANGLES WERE NOTED. THE LENS WAS EXCHANGED ON (B)(6) 2023 FOR A SHORTER LENGTH LENS AND THE PROBLEM RESOLVED. CAUSE WAS REPORTED AS UNKNOWN. Manufact…	-11.0/+1.5/134	OD	Physician	02/28/2023	2023	22	Male
https://www.accessdata.fda.gov/scripts/cdrh/cfdocs/cfMAUDE/Detail.CFM?MDRFOI__ID=16650146&pc=QCB	2023826-2023-01140	2023-02-17 05:00:00	Injury	STAAR SURGICAL COMPANY	2023-03-30 04:00:00	QCB	IMPLANTABLE COLLAMER LENS (ICL)	Adverse Event Without Identified Device or Use Problem	Appropriate Clinical Signs, Symptoms, Conditions Term / Code Not Available	P030016	Event Description: THE REPORTER INDICATED THAT A 13.2MM VTICMO13.2 IMPLANTABLE COLLAMER LENS -12.50/+1.5/085 (SPHERE/CYLINDER/AXIS) WAS IMPLANTED INTO THE PATIENTS LEFT EYE (OS) ON (B)(6) 2023. THE LENS IMPLANTED AND REMOVED INTRAOPERATIVELY DUE TO THE SURGEON ACCIDENTALLY PUNCTURING THE ANTERIOR CAPSULE WITH A SCALPEL. PHACO-EMULSIFICATION (CATARACT SURGERY) AND IOL IMPLANTATION WAS PERFORMED. P…	-12.50/+1.5/085	OS	Physician	02/28/2023	2023	23	Female
https://www.accessdata.fda.gov/scripts/cdrh/cfdocs/cfMAUDE/Detail.CFM?MDRFOI__ID=16673868&pc=QCB	2023826-2023-01035	2023-03-01 05:00:00	Injury	STAAR SURGICAL COMPANY	2023-04-04 04:00:00	QCB	IMPLANTABLE COLLAMER LENS (ICL)	Inadequacy of Device Shape and/or Size	Appropriate Clinical Signs, Symptoms, Conditions Term / Code Not Available	P030016	Event Description: THE REPORTER INDICATED THAT THE SURGEON IMPLANTED A 12.1MM VTICMO12.1, -16.0/1.5/105 (SPHERE/CYLINDER/AXIS), IMPLANTABLE COLLAMER LENS INTO THE PATIENT'S RIGHT EYE (OD) ON (B)(6) 2023. THE LENS WAS REPLACED WITH A LONGER LENGTH LENS DUE TO LOW VAULT ON (B)(6) 2023. THIS RESOLVED THE PROBLEM. CAUSE OF THE EVENT IS REPORTED AS UNKNOWN. Manufacturer Narrative: CLAIM#: (B)(4).	-16.0/1.5/105	OD	Physician	03/13/2023	2023	37	Female
https://www.accessdata.fda.gov/scripts/cdrh/cfdocs/cfMAUDE/Detail.CFM?MDRFOI__ID=16673881&pc=QCB	2023826-2023-01042	2022-10-10 04:00:00	Injury	STAAR SURGICAL COMPANY	2023-04-04 04:00:00	QCB	IMPLANTABLE COLLAMER LENS (ICL)	Inadequacy of Device Shape and/or Size	Appropriate Clinical Signs, Symptoms, Conditions Term / Code Not Available	P030016	Event Description: THE REPORTER INDICATED THAT THE SURGEON IMPLANTED A 12.6MM VTICMO12.6, -18.0/2.0/033 (SPHERE/CYLINDER/AXIS), IMPLANTABLE COLLAMER LENS INTO THE PATIENT'S RIGHT EYE (OD) ON (B)(6) 2021. THE LENS WAS REPLACED WITH A SHORTER LENGTH LENS DUE TO EXCESSIVE VAULT ON (B)(6) 2023. THIS RESOLVED THE PROBLEM. Manufacturer Narrative: CLAIM#: (B)(4).	-18.0/2.0/033	OD	Physician	03/14/2023	2023	29	Female
https://www.accessdata.fda.gov/scripts/cdrh/cfdocs/cfMAUDE/Detail.CFM?MDRFOI__ID=16673917&pc=QCB	2023826-2023-01052	2023-01-08 05:00:00	Injury	STAAR SURGICAL COMPANY	2023-04-04 04:00:00	QCB	IMPLANTABLE COLLAMER LENS (ICL)	Inadequacy of Device Shape and/or Size	Appropriate Clinical Signs, Symptoms, Conditions Term / Code Not Available	P030016	Event Description: THE REPORTER INDICATED THAT THE SURGEON IMPLANTED A 13.2MM VTICMO13.2, -18.0/2.5/093 (SPHERE/CYLINDER/AXIS), IMPLANTABLE COLLAMER LENS INTO THE PATIENT'S RIGHT EYE (OD) ON (B)(6)2023. THE LENS WAS REPLACED WITH A SHORTER LENGTH LENS DUE TO EXCESSIVE VAULT ON (B)(6) 2023. THIS RESOLVED THE PROBLEM. CAUSE OF THE EVENT IS REPORTED AS UNKNOWN. Manufacturer Narrative: (B)(4).	-18.0/2.5/093	OD	Physician	03/15/2023	2023	33	Female
https://www.accessdata.fda.gov/scripts/cdrh/cfdocs/cfMAUDE/Detail.CFM?MDRFOI__ID=16673936&pc=QCB	2023826-2023-01054	2023-02-15 05:00:00	Injury	STAAR SURGICAL COMPANY	2023-04-04 04:00:00	QCB	IMPLANTABLE COLLAMER LENS (ICL)	Off-Label Use; Inadequacy of Device Shape and/or Size	Appropriate Clinical Signs, Symptoms, Conditions Term / Code Not Available	P030016	Event Description: THE REPORTER INDICATED THAT THE SURGEON IMPLANTED A 13.2MM VTICMO13.2, -9.0/1.0/093 (SPHERE/CYLINDER/AXIS), IMPLANTABLE COLLAMER LENS INTO THE PATIENT'S RIGHT EYE (OD) ON (B)(6) 2023. THE LENS WAS REPLACED WITH A SHORTER LENGTH LENS DUE TO SIGNIFICANT REDUCTION OF IRIDO-CORNEAL ANGLES AND EXCESSIVE VAULT ON (B)(6) 2023. THIS RESOLVED THE PROBLEM. CAUSE OF THE EVENT IS REPORTED …	-9.0/1.0/093	OD	Physician	03/16/2023	2023	26	Female
https://www.accessdata.fda.gov/scripts/cdrh/cfdocs/cfMAUDE/Detail.CFM?MDRFOI__ID=16683450&pc=QCB	2023826-2023-01258	2023-02-28 05:00:00	Injury	STAAR SURGICAL COMPANY	2023-04-05 04:00:00	QCB	IMPLANTABLE COLLAMER LENS (ICL)	Inadequacy of Device Shape and/or Size	Appropriate Clinical Signs, Symptoms, Conditions Term / Code Not Available	P030016	Event Description: THE REPORTER INDICATED THAT A 12.6MM VTICM5_12.6 IMPLANTABLE COLLAMER LENS OF -11.00/2.00/102 (SPHERE/CYLINDER/AXIS) WAS IMPLANTED INTO THE PATIENT'S RIGHT EYE (OD) ON (B)(6) 2023. ON (B)(6) 2023 THE LENS WAS EXCHANGED WITH A SHORTER LENGTH LENS DUE TO EXCESSIVE VAULT AND SIGNIFICANT REDUCTION OF IRIDOCORNEAL ANGLES. THE EXCHANGE RESOLVED THE PROBLEM. IN THE REPORTERS OPINION T…	-11.00/2.00/102	OD	Physician	03/06/2023	2023	53	Female
https://www.accessdata.fda.gov/scripts/cdrh/cfdocs/cfMAUDE/Detail.CFM?MDRFOI__ID=16683536&pc=QCB	2023826-2023-01259	2023-02-28 05:00:00	Injury	STAAR SURGICAL COMPANY	2023-04-05 04:00:00	QCB	IMPLANTABLE COLLAMER LENS (ICL)	Inadequacy of Device Shape and/or Size	Appropriate Clinical Signs, Symptoms, Conditions Term / Code Not Available	P030016	Event Description: THE REPORTER INDICATED THAT A 12.6MM VTICM5_12.6 IMPLANTABLE COLLAMER LENS OF -11.00/1.5/072 (SPHERE/CYLINDER/AXIS) WAS IMPLANTED INTO THE PATIENT'S LEFT EYE (OS) ON (B)(6) 2023. ON (B)(6) 2023 THE LENS WAS EXCHANGED WITH A SHORTER LENGTH LENS DUE TO EXCESSIVE VAULT AND SIGNIFICANT REDUCTION OF IRIDOCORNEAL ANGLES. THE EXCHANGE RESOLVED THE PROBLEM. IN THE REPORTERS OPINION THE…	-11.00/1.5/072	OS	Physician	03/06/2023	2023	53	Female
https://www.accessdata.fda.gov/scripts/cdrh/cfdocs/cfMAUDE/Detail.CFM?MDRFOI__ID=16710057&pc=QCB	2023826-2023-01326	2022-04-07 04:00:00	Malfunction	STAAR SURGICAL COMPANY	2023-04-10 04:00:00	QCB	IMPLANTABLE COLLAMER LENS (ICL)	Inadequacy of Device Shape and/or Size	Appropriate Clinical Signs, Symptoms, Conditions Term / Code Not Available	P030016	Event Description: THE REPORTER INDICATED THAT THE SURGEON IMPLANTED A 13.2MM VTICM5_13.2; -4.00/+3.5/096 (SPHERE/CYLINDER/AXIS) IMPLANTABLE COLLAMER LENS INTO THE PATIENT'S RIGHT EYE (OD) ON (B)(6)2022. THE SURGEON REPORTS EXCESSIVE VAULTING AND SIGNIFICANT REDUCTION OF IRIDO-CORNEAL ANGLES. LENS REMAINS IMPLANTED. CAUSE OF THE EVENT WAS REPORTED AS THE DEVICE. ATTEMPTS TO OBTAIN ADDITIONAL INFO…	-4.00/+3.5/096	OD	Physician	03/15/2023	2023	39	Female
https://www.accessdata.fda.gov/scripts/cdrh/cfdocs/cfMAUDE/Detail.CFM?MDRFOI__ID=16710074&pc=QCB	2023826-2023-01327	2022-04-07 04:00:00	Malfunction	STAAR SURGICAL COMPANY	2023-04-10 04:00:00	QCB	IMPLANTABLE COLLAMER LENS (ICL)	Inadequacy of Device Shape and/or Size	Appropriate Clinical Signs, Symptoms, Conditions Term / Code Not Available	P030016	Event Description: THE REPORTER INDICATED THAT THE SURGEON IMPLANTED A 13.2MM VTICM5_13.2; -6.00/+5.0/092 (SPHERE/CYLINDER/AXIS) IMPLANTABLE COLLAMER LENS INTO THE PATIENT'S LEFT EYE (OS) ON (B)(6) 2022. THE SURGEON REPORTS EXCESSIVE VAULTING; SIGNIFICANT REDUCTION OF IRIDO-CORNEAL ANGLES; INFERIOR IRIS; ENDOTHELIAL CORNEAL TOUCH; KERATITIS. LENS REMAINS IMPLANTED. THE CAUSE OF THE EVENT WAS REPO…	-6.00/+5.0/092	OS	Physician	03/15/2023	2023	39	Female
https://www.accessdata.fda.gov/scripts/cdrh/cfdocs/cfMAUDE/Detail.CFM?MDRFOI__ID=16750639&pc=QCB	2023826-2023-01232	2023-01-31 05:00:00	Injury	STAAR SURGICAL COMPANY	2023-04-17 04:00:00	QCB	IMPLANTABLE COLLAMER LENS (ICL)	Inadequacy of Device Shape and/or Size	Appropriate Clinical Signs, Symptoms, Conditions Term / Code Not Available	P030016	Event Description: THE REPORTER INDICATED THAT THE SURGEON IMPLANTED A 12.6MM VTICMO12.6, -10.5/3.5/093 (SPHERE/CYLINDER/AXIS), IMPLANTABLE COLLAMER LENS INTO THE PATIENT'S LEFT EYE (OS) ON (B)(6) 2023. IN A SECOND SURGERY THE LENS WAS REPLACED WITH A SHORTER LENGTH LENS DUE TO ELEVATED IOP(40MMHG) WITHOUT PUPIL BLOCK AND SINGLE CLOSURE(ASSESSED ON 31/JAN/2023), SIGNIFICANT REDUCTION OF IRIDO-COR…	-10.5/3.5/093	OS	Physician	03/27/2023	2023	28	Female
https://www.accessdata.fda.gov/scripts/cdrh/cfdocs/cfMAUDE/Detail.CFM?MDRFOI__ID=16766249&pc=QCB	2023826-2023-01439	2023-03-02 05:00:00	Injury	STAAR SURGICAL COMPANY	2023-04-18 04:00:00	QCB	IMPLANTABLE COLLAMER LENS (ICL)	Off-Label Use; Adverse Event Without Identified Device or Use Problem	Appropriate Clinical Signs, Symptoms, Conditions Term / Code Not Available	P030016	Event Description: THE REPORTER INDICATED THAT A 13.2MM VTICMO13.2 IMPLANTABLE COLLAMER LENS OF -15.00/1.5/075 (SPHERE/CYLINDER/AXIS) WAS IMPLANTED INTO THE PATIENT'S LEFT EYE (OS) ON (B)(6)2023. FIXED DILATED PUPIL; UNREACTIVE TO LIGHT WAS OBSERVED. THE REPORTER STATES "FROM DAY 1. PILOCARPINE USED WEEK 1 MINIMAL CONSTRICTION NOTED ON FFUP. PLANNING TO DO INTRACAMERAL DILATION. PRED AND OFTAQUIX…	-15.00/1.5/075	OS	Physician	12/14/2023	2023	22	Male
https://www.accessdata.fda.gov/scripts/cdrh/cfdocs/cfMAUDE/Detail.CFM?MDRFOI__ID=16769995&pc=QCB	2023826-2023-01376	2023-02-16 05:00:00	Injury	STAAR SURGICAL COMPANY	2023-04-19 04:00:00	QCB	IMPLANTABLE COLLAMER LENS (ICL)	Inadequacy of Device Shape and/or Size	Appropriate Clinical Signs, Symptoms, Conditions Term / Code Not Available	P030016	Event Description: THE REPORTER INDICATED THE SURGEON IMPLANTED A 12.6MM VTICMO12.6 IMPLANTABLE COLLAMER LENS, -14.50/+2.5/091 (SPHERE/CYLINDER/AXIS) INTO THE PATIENTS RIGHT EYE (OD) ON (B)(6) 2022. THE LENS WAS REMOVED ON (B)(6) 2023 DUE TO EXCESSIVE VAULTING, SIGNIFICANT REDUCTION OF IRIDO-CORNEAL ANGLES AND PIGMENT DISPERSION. THE LENS WAS REPLACED WITH A SHORTER LENS AND THE PROBLEM WAS RESOL…	-14.50/+2.5/091	OD	Physician	03/21/2023	2023	22	Female
https://www.accessdata.fda.gov/scripts/cdrh/cfdocs/cfMAUDE/Detail.CFM?MDRFOI__ID=16773625&pc=QCB	2023826-2023-01415	2022-11-28 05:00:00	Injury	STAAR SURGICAL COMPANY	2023-04-19 04:00:00	QCB	IMPLANTABLE COLLAMER LENS (ICL)	Inadequacy of Device Shape and/or Size	Appropriate Clinical Signs, Symptoms, Conditions Term / Code Not Available	P030016	Event Description: THE REPORTER INDICATED THAT THE SURGEON IMPLANTED A 13.7MM VTICMO13.7 IMPLANTABLE COLLAMER LENS OF DIOPTER -14.0/+2.0/135 INTO THE PATIENT'S RIGHT EYE (OD) ON (B)(6) 2022. EXCESSIVE VAULT AND SIGNIFICANT REDUCTION OF IRIDO-CORNEAL ANGLES WERE NOTED. THE LENS WAS EXCHANGED ON (B)(6) 2023 FOR A SHORTER LENGTH LENS AND THE PROBLEM RESOLVED. CAUSE WAS REPORTED AS "OTHER- EXCESSIVE …	-14.0/+2.0/135	OD	Physician	03/24/2023	2023	22	Male
https://www.accessdata.fda.gov/scripts/cdrh/cfdocs/cfMAUDE/Detail.CFM?MDRFOI__ID=16787274&pc=QCB	2023826-2023-01470	2023-04-19 04:00:00	Injury	STAAR SURGICAL COMPANY	2023-04-21 04:00:00	QCB	IMPLANTABLE COLLAMER LENS (ICL)	No Apparent Adverse Event	Appropriate Clinical Signs, Symptoms, Conditions Term / Code Not Available	P030016	Event Description: THE REPORTER INDICATED THAT THE SURGEON IMPLANTED A 12.6MM VTICM5_12.6; -4.0/+1.0/146 (SPHERE/CYLINDER/AXIS) IMPLANTABLE COLLAMER LENS INTO THE PATIENT'S RIGHT EYE (OD) ON (B)(6) 2023. THE SURGEON REPORTS THAT MONOVISION WAS NOT TOLERATED. LENS REMAINS IMPLANTED. IF ADDITIONAL INFORMATION IS RECEIVED A SUPPLEMENTAL MEDWATCH REPORT WILL BE SUBMITTED. Manufacturer Narrative: ADDI…	-4.0/+1.0/146	OD	Physician	04/19/2023	2023	43	Male
https://www.accessdata.fda.gov/scripts/cdrh/cfdocs/cfMAUDE/Detail.CFM?MDRFOI__ID=16811558&pc=QCB	2023826-2023-01537	2023-03-01 05:00:00	Injury	STAAR SURGICAL COMPANY	2023-04-25 04:00:00	QCB	IMPLANTABLE COLLAMER LENS (ICL)	Inadequacy of Device Shape and/or Size	Appropriate Clinical Signs, Symptoms, Conditions Term / Code Not Available	P030016	Event Description: THE REPORTER INDICATED THAT THE SURGEON IMPLANTED A 13.2MM VTICM5_13.2 IMPLANTABLE COLLAMER LENS OF DIOPTER -14.0/+1.5/115 INTO THE PATIENT'S RIGHT EYE (OD) ON (B)(6) 2023. EXCESSIVE VAULT AND SIGNIFICANT REDUCTION OF IRIDO-CORNEAL ANGLES WERE NOTED. THE LENS WAS REMOVED ON (B)(6) 2023 AND IN A SEPARATE SURGERY THAT DAY A SHORTER LENGTH LENS WAS IMPLANTED. THE PROBLEM WAS RESOL…	-14.0/+1.5/115	OD	Physician	03/28/2023	2023	35	Male
https://www.accessdata.fda.gov/scripts/cdrh/cfdocs/cfMAUDE/Detail.CFM?MDRFOI__ID=16850165&pc=QCB	2023826-2023-01611	2022-11-10 05:00:00	Injury	STAAR SURGICAL COMPANY	2023-05-01 04:00:00	QCB	IMPLANTABLE COLLAMER LENS (ICL)	Inadequacy of Device Shape and/or Size	Appropriate Clinical Signs, Symptoms, Conditions Term / Code Not Available	P030016	Event Description: THE REPORTER INDICATED THAT THE SURGEON IMPLANTED A 13.2MM VTICMO13.2; -5.5/1.0/33 (SPHERE/CYLINDER/AXIS) IMPLANTABLE COLLAMER LENS INTO THE PATIENT'S RIGHT EYE (OD) ON (B)(6)2022. THE PATIENT EXPERIENCED EXCESSIVE VAULTING AND SIGNIFICANT REDUCTION OF IRIDO-CORNEAL ANGLES. ON (B)(6) 2022 THE LENS WAS EXCHANGED WITH A SHORTER LENGTH LENS AND THIS RESOLVED THE PROBLEM. THE CAUSE…	-5.5/1.0/33	OD	Physician	04/28/2023	2023	30	Female
https://www.accessdata.fda.gov/scripts/cdrh/cfdocs/cfMAUDE/Detail.CFM?MDRFOI__ID=16939040&pc=QCB	2023826-2023-01657	2023-04-27 04:00:00	Injury	STAAR SURGICAL COMPANY	2023-05-16 04:00:00	QCB	IMPLANTABLE COLLAMER LENS (ICL)	Adverse Event Without Identified Device or Use Problem; No Apparent Adverse Event	Appropriate Clinical Signs, Symptoms, Conditions Term / Code Not Available	P030016	Event Description: THE REPORTER INDICATED THAT A 13.2MM VTICM513.2, -9.0/1.0/075 (SPHERE/CYLINDER/AXIS), IMPLANTABLE COLLAMER LENS WAS IMPLANTED ON (B)(6) 2023. PIGMENT DISPERSION AND IRREGULAR PUPIL HAS BEEN OBSERVED. LENS REMAINS IMPLANTED. PATIENT REMAINS UNDER OBSERVATION. CAUSE OF THE EVENT IS REPORTED AS UNKNOWN. ADDITIONAL INFORMATION HAS BEEN REQUESTED BUT NONE HAS BEEN FORTHCOMING. Manuf…	-9.0/1.0/075	OD	Physician	05/02/2023	2023	23	Male
https://www.accessdata.fda.gov/scripts/cdrh/cfdocs/cfMAUDE/Detail.CFM?MDRFOI__ID=16942439&pc=QCB	2023826-2023-01855		Injury	STAAR SURGICAL COMPANY	2023-05-16 04:00:00	QCB	IMPLANTABLE COLLAMER LENS (ICL)	Inadequacy of Device Shape and/or Size	Appropriate Clinical Signs, Symptoms, Conditions Term / Code Not Available	P030016	Event Description: THE REPORTER INDICATED THE SURGEON IMPLANTED A 13.2MM VTICM5_13.2 IMPLANTABLE COLLAMER LENS, -06.50/+3.5/030 (SPHERE/CYLINDER/AXIS), IN THE PATIENTS LEFT EYE (OS), ON (B)(6) 2023. THE LENS WAS REMOVED ON 30-MAR-2023 DUE TO EXCESSIVE VAULTING AND PIGMENT DISPERSION. THERE WAS VISIBLE IRIS CHAFING AND ANTERIOR LENS SURFACE PIGMENT ADHESIONS. THE LENS WAS REPLACED WITH A SHORTER L…	-06.50/+3.5/030	OS	Physician	04/16/2023	2023		Female
https://www.accessdata.fda.gov/scripts/cdrh/cfdocs/cfMAUDE/Detail.CFM?MDRFOI__ID=16960301&pc=QCB	2023826-2023-01870	2022-11-10 05:00:00	Injury	STAAR SURGICAL COMPANY	2023-05-19 04:00:00	QCB	IMPLANTABLE COLLAMER LENS (ICL)	Inadequacy of Device Shape and/or Size	Appropriate Clinical Signs, Symptoms, Conditions Term / Code Not Available	P030016	Event Description: THE REPORTER INDICATED THE SURGEON IMPLANTED A 13.2MM VTICMO13.2 IMPLANTABLE COLLAMER LENS, -05.50/+1.0/111 (SPHERE/CYLINDER/AXIS), IN THE PATIENTS LEFT EYE (OS), ON (B)(6) 2022. THE LENS WAS EXPLANTED ON (B)(6) 2022 DUE TO EXCESSIVE VAULTING AND SIGNIFICANT REDUCTION OF IRIDO-CORNEAL ANGLES. THE LENS WAS REPLACED WITH A SHORTER LENS AND THE PROBLEM WAS RESOLVED. NO DISCOMFORT.…	-05.50/+1.0/111	OS	Physician	04/21/2023	2023	30	Female
https://www.accessdata.fda.gov/scripts/cdrh/cfdocs/cfMAUDE/Detail.CFM?MDRFOI__ID=16967951&pc=QCB	2023826-2023-01914	2023-02-09 05:00:00	Injury	STAAR SURGICAL COMPANY	2023-05-19 04:00:00	QCB	IMPLANTABLE COLLAMER LENS (ICL)	Inadequacy of Device Shape and/or Size	Appropriate Clinical Signs, Symptoms, Conditions Term / Code Not Available	P030016	Event Description: THE REPORTER INDICATED THAT THE SURGEON IMPLANTED A 12.6MM VTICMO12.6 IMPLANTABLE COLLAMER LENS OF DIOPTER -10.5/+1.0/116 INTO THE PATIENT'S RIGHT EYE (OD) ON (B)(6)2023. EXCESSIVE VAULT AND SIGNIFICANT REDUCTION OF IRIDO-CORNEAL ANGLES WERE REPORTED. THE LENS WAS EXPLANTED ON (B)(6)2023 AND IN ANOTHER SURGERY THAT DAY A SHORTER LENGTH LENS WAS IMPLANTED. THIS RESOLVED THE PROB…	-10.5/+1.0/116	OD	Physician	04/21/2023	2023	26	Female
https://www.accessdata.fda.gov/scripts/cdrh/cfdocs/cfMAUDE/Detail.CFM?MDRFOI__ID=16989907&pc=QCB	2023826-2023-02015	2023-03-30 04:00:00	Malfunction	STAAR SURGICAL COMPANY	2023-05-23 04:00:00	QCB	IMPLANTABLE COLLAMER LENS (ICL)	Inadequacy of Device Shape and/or Size	Appropriate Clinical Signs, Symptoms, Conditions Term / Code Not Available	P030016	Event Description: THE REPORTER INDICATED THAT THE SURGEON IMPLANTED A 13.2MM VTICMO13.2 IMPLANTABLE COLLAMER LENS OF DIOPTER -15.0/+2.5/071 INTO THE PATIENT'S RIGHT EYE (OD) ON (B)(6) 2023. WITHIN THE INITIAL SURGERY THE LENS WAS REMOVED AND REPLACED INTRA-OPERATIVELY FOR A SHORTER LENGTH LENS DUE TO EXCESSIVE VAULT. SIGNIFICANT REDUCTION OF IRIDO-CORNEAL ANGLES WAS ALSO NOTED. THE PROBLEM WAS R…	-15.0/+2.5/071	OD	Physician	04/24/2023	2023	41	Female
https://www.accessdata.fda.gov/scripts/cdrh/cfdocs/cfMAUDE/Detail.CFM?MDRFOI__ID=16996883&pc=QCB	2023826-2023-01997		Injury	STAAR SURGICAL COMPANY	2023-05-24 04:00:00	QCB	IMPLANTABLE COLLAMER LENS (ICL)	Off-Label Use; Inadequacy of Device Shape and/or Size	Appropriate Clinical Signs, Symptoms, Conditions Term / Code Not Available	P030016	Event Description: THE REPORTER INDICATED THAT A 13.7MM VTICMO13.7 IMPLANTABLE COLLAMER LENS OF -10.0/2.0/074 (SPHERE/CYLINDER/AXIS) WAS IMPLANTED INTO THE PATIENT'S LEFT EYE (OS) ON (B)(6) 2023. EXCESSIVE VAULT AND SIGNIFICANT REDUCTION OF IRIDOCORNEAL ANGLES WAS OBSERVED, LENS REMAINS IMPLANTED. THE REPORTER STATES THE CAUSE OF THIS EVENT IS DUE TO PATIENT RELATED FACTORS, HOWEVER "UNKNOWN" WAS…	-10.0/2.0/074	OS	Physician	12/14/2023	2023		Female
https://www.accessdata.fda.gov/scripts/cdrh/cfdocs/cfMAUDE/Detail.CFM?MDRFOI__ID=17007062&pc=QCB	2023826-2023-02048		Injury	STAAR SURGICAL COMPANY	2023-05-25 04:00:00	QCB	IMPLANTABLE COLLAMER LENS (ICL)	Inadequacy of Device Shape and/or Size	Appropriate Clinical Signs, Symptoms, Conditions Term / Code Not Available	P030016	Event Description: THE REPORTER INDICATED THAT THE SURGEON IMPLANTED A 13.2MM VTICM5_13.2; 12.50/+3.5/090 (SPHERE/CYLINDER/AXIS) IMPLANTABLE COLLAMER LENS INTO THE PATIENT'S RIGHT EYE (OD) ON (B)(6)2023. THE PATIENT EXPERIENCED EXCESSIVE VAULTING AND SIGNIFICANT REDUCTION OF IRIDO-CORNEAL ANGLES. LENS REMAINS IMPLANTED. THE CAUSE OF THE EVENT WAS REPORTED AS THE DEVICE. Manufacturer Narrative: HE…	12.50/+3.5/090	OD	Physician	05/03/2023	2023		Male
https://www.accessdata.fda.gov/scripts/cdrh/cfdocs/cfMAUDE/Detail.CFM?MDRFOI__ID=17007066&pc=QCB	2023826-2023-02049		Malfunction	STAAR SURGICAL COMPANY	2023-05-25 04:00:00	QCB	IMPLANTABLE COLLAMER LENS (ICL)	Inadequacy of Device Shape and/or Size	Appropriate Clinical Signs, Symptoms, Conditions Term / Code Not Available	P030016	Event Description: REPORTER INDICATED THAT THE SURGEON IMPLANTED A 13.2MM VTICM5_13.2; 13.50/+3.0/088 (SPHERE/CYLINDER/AXIS) IMPLANTABLE COLLAMER LENS INTO THE PATIENT'S LEFT EYE (OS) ON (B)(6) 2023. THE PATIENT EXPERIENCED EXCESSIVE VAULTING AND SIGNIFICANT REDUCTION OF IRIDO-CORNEAL ANGLES. LENS REMAINS IMPLANTED. THE CAUSE OF THE EVENT WAS REPORTED AS THE DEVICE. Manufacturer Narrative: ADDITI…	13.50/+3.0/088	OS	Physician	05/03/2023	2023		Male
https://www.accessdata.fda.gov/scripts/cdrh/cfdocs/cfMAUDE/Detail.CFM?MDRFOI__ID=17013784&pc=QCB	2023826-2023-01947	2023-04-28 04:00:00	Injury	STAAR SURGICAL COMPANY	2023-05-26 04:00:00	QCB	IMPLANTABLE COLLAMER LENS (ICL)	Inadequacy of Device Shape and/or Size	Appropriate Clinical Signs, Symptoms, Conditions Term / Code Not Available	P030016	Event Description: THE REPORTER INDICATED THE SURGEON IMPLANTED A 13.2MM VTICM5_13.2 IMPLANTABLE COLLAMER LENS, -11.00/+1.0/077 (SPHERE/CYLINDER/AXIS), INTO THE PATIENTS RIGHT EYE (OD) ON (B)(6) 2023. THE LENS WAS REPORTED AS EXCESSIVE VAULTING AND SIGNIFICANT REDUCTION OF IRIDO-CORNEAL ANGLES. THE LENS REMAINED IMPLANTED. THE PATIENT IS HAPPY WITH VERY GOOD VISION AND WILL BE MONITORED. THE CAUS…	-11.00/+1.0/077	OD	Physician	05/02/2023	2023	27	Female
https://www.accessdata.fda.gov/scripts/cdrh/cfdocs/cfMAUDE/Detail.CFM?MDRFOI__ID=17015322&pc=QCB	2023826-2023-02068	2023-03-08 05:00:00	Injury	STAAR SURGICAL COMPANY	2023-05-26 04:00:00	QCB	IMPLANTABLE COLLAMER LENS (ICL)	Off-Label Use; Inadequacy of Device Shape and/or Size	Appropriate Clinical Signs, Symptoms, Conditions Term / Code Not Available	P030016	Event Description: THE REPORTER INDICATED THAT THE SURGEON IMPLANTED A 13.2MM VTICMO13.2 IMPLANTABLE COLLAMER LENS OF DIOPTER -9.5/+1.0/093 INTO THE PATIENT'S RIGHT EYE (OD) ON (B)(6) 2023. THE LENS WAS EXCHANGED ON (B)(6) 2023 FOR A SHORTER LENGTH LENS DUE TO EXCESSIVE VAULT AND SIGNIFICANT REDUCTION OF IRIDO-CORNEAL ANGLES. THIS RESOLVED THE PROBLEM. CAUSE OF EVENT REPORTED AS UNKNOWN. Manufact…	-9.5/+1.0/093	OD	Physician	04/28/2023	2023	15	Female
https://www.accessdata.fda.gov/scripts/cdrh/cfdocs/cfMAUDE/Detail.CFM?MDRFOI__ID=17039561&pc=QCB	2023826-2023-01882		Injury	STAAR SURGICAL COMPANY	2023-06-01 04:00:00	QCB	IMPLANTABLE COLLAMER LENS (ICL)	Inadequacy of Device Shape and/or Size	Appropriate Clinical Signs, Symptoms, Conditions Term / Code Not Available	P030016	Event Description: THE REPORTER INDICATED THAT THE SURGEON IMPLANTED A 13.2MM VTICMO13.2, -14.5/5.0/074 (SPHERE/CYLINDER/AXIS), IMPLANTABLE COLLAMER LENS INTO THE PATIENT'S LEFT EYE (OS) ON (B)(6) 2023. EXCESSIVE VAULT WAS OBSERVED. PRESSURE CONTROLLED WITH ORAL AND TOPICAL MEDICATIONS. LENS REMAINS IMPLANTED. Manufacturer Narrative: ADDITIONAL INFORMATION: B5: THE REPORTER INDICATED THAT THE SUR…	-14.5/5.0/074	OS	Physician	05/09/2023	2023		Female
https://www.accessdata.fda.gov/scripts/cdrh/cfdocs/cfMAUDE/Detail.CFM?MDRFOI__ID=17039563&pc=QCB	2023826-2023-01881		Injury	STAAR SURGICAL COMPANY	2023-06-01 04:00:00	QCB	IMPLANTABLE COLLAMER LENS (ICL)	Off-Label Use; Inadequacy of Device Shape and/or Size	Appropriate Clinical Signs, Symptoms, Conditions Term / Code Not Available	P030016	Event Description: THE REPORTER INDICATED THAT THE SURGEON IMPLANTED A 13.2MM VTICMO13.2, -15.5/3.5/074 (SPHERE/CYLINDER/AXIS), IMPLANTABLE COLLAMER LENS INTO THE PATIENT'S RIGHT EYE (OD) ON (B)(6) 2023. EXCESSIVE VAULT WAS OBSERVED. PRESSURE CONTROLLED WITH ORAL AND TOPICAL MEDICATIONS. LENS REMAINS IMPLANTED. Manufacturer Narrative: A4 - UNK. A5 - UNK. A6 - UNK. H6 - WORK ORDER SEARCH: NO SIMIL…	-15.5/3.5/074	OD	Physician	05/09/2023	2023		Female
https://www.accessdata.fda.gov/scripts/cdrh/cfdocs/cfMAUDE/Detail.CFM?MDRFOI__ID=17084050&pc=QCB	2023826-2023-02283	2023-04-18 04:00:00	Injury	STAAR SURGICAL COMPANY	2023-06-07 04:00:00	QCB	IMPLANTABLE COLLAMER LENS (ICL)	Off-Label Use; Inadequacy of Device Shape and/or Size	Appropriate Clinical Signs, Symptoms, Conditions Term / Code Not Available	P030016	Event Description: THE REPORTER INDICATED THAT THE SURGEON IMPLANTED A 12.6MM VTICMO12.6 IMPLANTABLE COLLAMER LENS OF DIOPTER -14.0/+2.5/179 INTO THE PATIENT'S RIGHT EYE (OD) ON (B)(6) 2023. THE LENS WAS EXCHANGED ON (B)(6) 2023 FOR A SHORTER LENGTH LENS DUE TO EXCESSIVE VAULT AND SIGNIFICANT REDUCTION OF IRIDO-CORNEAL ANGLES. THIS RESOLVED THE PROBLEM. CAUSE OF EVENT REPORTED AS UNKNOWN. Manufac…	-14.0/+2.5/179	OD	Physician	05/11/2023	2023	31	Male
https://www.accessdata.fda.gov/scripts/cdrh/cfdocs/cfMAUDE/Detail.CFM?MDRFOI__ID=17084051&pc=QCB	2023826-2023-02282	2023-04-26 04:00:00	Injury	STAAR SURGICAL COMPANY	2023-06-07 04:00:00	QCB	IMPLANTABLE COLLAMER LENS (ICL)	Inadequacy of Device Shape and/or Size	Appropriate Clinical Signs, Symptoms, Conditions Term / Code Not Available	P030016	Event Description: THE REPORTER INDICATED THAT THE SURGEON IMPLANTED A 12.6MM VTICMO12.6 IMPLANTABLE COLLAMER LENS OF DIOPTER -6.0/+1.0/103 INTO THE PATIENT'S RIGHT EYE (OD) ON (B)(6) 2023. IN A SEPARATE SURGERY THAT DAY THE LENS WAS EXCHANGED FOR A SHORTER LENGTH LENS DUE TO EXCESSIVE VAULT AND SIGNIFICANT REDUCTION OF IRIDO-CORNEAL ANGLES. THIS RESOLVED THE PROBLEM. CAUSE REPORTED AS UNKNOWN. M…	-6.0/+1.0/103	OD	Physician	05/11/2023	2023	29	Female
https://www.accessdata.fda.gov/scripts/cdrh/cfdocs/cfMAUDE/Detail.CFM?MDRFOI__ID=17091497&pc=QCB	2023826-2023-02290	2023-01-05 05:00:00	Injury	STAAR SURGICAL COMPANY	2023-06-08 04:00:00	QCB	IMPLANTABLE COLLAMER LENS (ICL)	Inadequacy of Device Shape and/or Size	Appropriate Clinical Signs, Symptoms, Conditions Term / Code Not Available	P030016	Event Description: THE REPORTER INDICATED THAT THE SURGEON IMPLANTED A 13.2MM VTICMO13.2 IMPLANTABLE COLLAMER LENS OF DIOPTER -11.5/+1.0/166 INTO THE PATIENT'S RIGHT EYE (OD) ON (B)(6) 2022. THE LENS WAS EXCHANGED ON (B)(6) 2023 FOR A SHORTER LENGTH LENS DUE TO EXCESSIVE VAULT AND SIGNIFICANT REDUCTION OF IRIDO-CORNEAL ANGLES. THIS RESOLVED THE PROBLEM. CAUSE REPORTED AS UNKNOWN. Manufacturer Nar…	-11.5/+1.0/166	OD	Physician	05/14/2023	2023	22	Female
https://www.accessdata.fda.gov/scripts/cdrh/cfdocs/cfMAUDE/Detail.CFM?MDRFOI__ID=17091777&pc=QCB	2023826-2023-02288	2023-04-21 04:00:00	Injury	STAAR SURGICAL COMPANY	2023-06-08 04:00:00	QCB	IMPLANTABLE COLLAMER LENS (ICL)	Inadequacy of Device Shape and/or Size	Appropriate Clinical Signs, Symptoms, Conditions Term / Code Not Available	P030016	Event Description: THE REPORTER INDICATED THAT THE SURGEON IMPLANTED A 13.2MM VTICM5_13.2 IMPLANTABLE COLLAMER LENS OF DIOPTER -11.0/+2.5/102 INTO THE PATIENT'S LEFT EYE (OS) ON (B)(6) 2023. EXCESSIVE VAULT AND SIGNIFICANT REDUCTION OF IRIDO-CORNEAL ANGLES WERE REPORTED. THE LENS WAS EXPLANTED ON (B)(6) 2023 AND IN SEPARATE SURGERY THAT DAY A SHORTER LENGTH LENS WAS IMPLANTED. THIS RESOLVED THE P…	-11.0/+2.5/102	OS	Physician	05/12/2023	2023	32	Female
https://www.accessdata.fda.gov/scripts/cdrh/cfdocs/cfMAUDE/Detail.CFM?MDRFOI__ID=17101390&pc=QCB	2023826-2023-02296	2023-05-16 04:00:00	Injury	STAAR SURGICAL COMPANY	2023-06-09 04:00:00	QCB	IMPLANTABLE COLLAMER LENS (ICL)	No Apparent Adverse Event	Appropriate Clinical Signs, Symptoms, Conditions Term / Code Not Available	P030016	Event Description: THE REPORTER INDICATED THAT THE SURGEON IMPLANTED A 12.6MM VTICM5_12.6; -8.50/1.0/004 (SPHERE/CYLINDER/AXIS) IMPLANTABLE COLLAMER LENS INTO THE PATIENT'S RIGHT EYE (OD) ON (B)(6) 2023. THE SURGEON INDICATES THE TEXTURE/PATTERN OF THE PERIPHERY OF THE IRIS HAS CHANGED POST ICL SURGERY. IT WAS INDICATED THE LENS WILL NOT BE REMOVED. LENS REMAINS IMPLANTED. THE CAUSE OF THE EVENT …	-8.50/1.0/004	OD	Physician	05/17/2023	2023	28	Female
https://www.accessdata.fda.gov/scripts/cdrh/cfdocs/cfMAUDE/Detail.CFM?MDRFOI__ID=17112171&pc=QCB	2023826-2023-02325	2023-05-04 04:00:00	Injury	STAAR SURGICAL COMPANY	2023-06-12 04:00:00	QCB	IMPLANTABLE COLLAMER LENS (ICL)	Off-Label Use; Inadequacy of Device Shape and/or Size	Appropriate Clinical Signs, Symptoms, Conditions Term / Code Not Available	P030016	Event Description: THE REPORTER INDICATED THAT THE SURGEON IMPLANTED A 12.6MM VTICMO12.6 IMPLANTABLE COLLAMER LENS OF DIOPTER -9.5/+2.5/093 INTO THE PATIENT'S LEFT EYE (OS) ON (B)(6) 2023. IN A SEPARATE SURGERY THAT DAY THE LENS WAS EXCHANGED FOR A SHORTER LENGTH LENS DUE TO EXCESSIVE VAULT AND SIGNIFICANT REDUCTION OF IRIDO-CORNEAL ANGLES. THIS RESOLVED THE PROBLEM. CAUSE OF EVENT REPORTED AS UN…	-9.5/+2.5/093	OS	Physician	05/15/2023	2023	23	Female
https://www.accessdata.fda.gov/scripts/cdrh/cfdocs/cfMAUDE/Detail.CFM?MDRFOI__ID=17112177&pc=QCB	2023826-2023-02327	2023-04-29 04:00:00	Injury	STAAR SURGICAL COMPANY	2023-06-12 04:00:00	QCB	IMPLANTABLE COLLAMER LENS (ICL)	Off-Label Use; Inadequacy of Device Shape and/or Size	Appropriate Clinical Signs, Symptoms, Conditions Term / Code Not Available	P030016	Event Description: THE REPORTER INDICATED THAT THE SURGEON IMPLANTED A 13.2MM VTICMO13.2 IMPLANTABLE COLLAMER LENS OF DIOPTER -15.0/+1.0/071 INTO THE PATIENT'S RIGHT EYE (OD) ON (B)(6) 2023. THE LENS WAS EXCHANGED ON (B)(6) 2023 FOR A SHORTER LENGTH LENS DUE TO EXCESSIVE VAULT AND SIGNIFICANT REDUCTION OF IRIDO-CORNEAL ANGLES. THIS RESOLVED THE PROBLEM. CAUSE OF EVENT REPORTED AS UNKNOWN. Manufac…	-15.0/+1.0/071	OD	Physician	05/15/2023	2023	28	Female
https://www.accessdata.fda.gov/scripts/cdrh/cfdocs/cfMAUDE/Detail.CFM?MDRFOI__ID=17112178&pc=QCB	2023826-2023-02329	2023-04-18 04:00:00	Injury	STAAR SURGICAL COMPANY	2023-06-12 04:00:00	QCB	IMPLANTABLE COLLAMER LENS (ICL)	Inadequacy of Device Shape and/or Size	Appropriate Clinical Signs, Symptoms, Conditions Term / Code Not Available	P030016	Event Description: THE REPORTER INDICATED THAT THE SURGEON IMPLANTED A 13.2MM VTICMO13.2 IMPLANTABLE COLLAMER LENS OF DIOPTER -5.5/+0.5/112 INTO THE PATIENT'S RIGHT EYE (OD) ON (B)(6) 2023. THE LENS WAS EXCHANGED ON (B)(6) 2023 FOR A SHORTER LENGTH LENS DUE TO EXCESSIVE VAULT AND SIGNIFICANT REDUCTION OF IRIDO-CORNEAL ANGLES. THIS RESOLVED THE PROBLEM. CAUSE REPORTED AS UNKNOWN. Manufacturer Narr…	-5.5/+0.5/112	OD	Physician	05/15/2023	2023	33	Male
https://www.accessdata.fda.gov/scripts/cdrh/cfdocs/cfMAUDE/Detail.CFM?MDRFOI__ID=17112181&pc=QCB	2023826-2023-02326	2023-04-27 04:00:00	Injury	STAAR SURGICAL COMPANY	2023-06-12 04:00:00	QCB	IMPLANTABLE COLLAMER LENS (ICL)	Inadequacy of Device Shape and/or Size	Appropriate Clinical Signs, Symptoms, Conditions Term / Code Not Available	P030016	Event Description: THE REPORTER INDICATED THAT THE SURGEON IMPLANTED A 13.2MM VTICMO13.2 IMPLANTABLE COLLAMER LENS OF DIOPTER -5.0/+2.0/090 INTO THE PATIENT'S LEFT EYE (OS) ON (B)(6) 2023. THE LENS WAS EXCHANGED ON (B)(6) 2023 FOR A SHORTER LENGTH LENS DUE TO EXCESSIVE VAULT AND SIGNIFICANT REDUCTION OF IRIDO-CORNEAL ANGLES. THIS RESOLVED THE PROBLEM. CAUSE REPORTED AS UNKNOWN. Manufacturer Narra…	-5.0/+2.0/090	OS	Physician	05/15/2023	2023	27	Female
https://www.accessdata.fda.gov/scripts/cdrh/cfdocs/cfMAUDE/Detail.CFM?MDRFOI__ID=17112202&pc=QCB	2023826-2023-02328	2023-04-29 04:00:00	Injury	STAAR SURGICAL COMPANY	2023-06-12 04:00:00	QCB	IMPLANTABLE COLLAMER LENS (ICL)	Off-Label Use; Inadequacy of Device Shape and/or Size	Appropriate Clinical Signs, Symptoms, Conditions Term / Code Not Available	P030016	Event Description: THE REPORTER INDICATED THAT THE SURGEON IMPLANTED A 13.2MM VTICMO13.2 IMPLANTABLE COLLAMER LENS OF DIOPTER -14.0/+1.5/067 INTO THE PATIENT'S LEFT EYE (OS) ON (B)(6) 2023. THE LENS WAS EXCHANGED ON (B)(6) 2023 FOR A SHORTER LENGTH LENS DUE TO EXCESSIVE VAULT AND SIGNIFICANT REDUCTION OF IRIDO-CORNEAL ANGLES. THIS RESOLVED THE PROBLEM. CAUSE OF EVENT REPORTED AS UNKNOWN. Manufact…	-14.0/+1.5/067	OS	Physician	05/15/2023	2023	28	Female
https://www.accessdata.fda.gov/scripts/cdrh/cfdocs/cfMAUDE/Detail.CFM?MDRFOI__ID=17119690&pc=QCB	2023826-2023-02164	2023-05-04 04:00:00	Malfunction	STAAR SURGICAL COMPANY	2023-06-13 04:00:00	QCB	IMPLANTABLE COLLAMER LENS (ICL)	No Apparent Adverse Event	Appropriate Clinical Signs, Symptoms, Conditions Term / Code Not Available	P030016	Event Description: THE REPORTER INDICATED THAT A 12.6MM VTICMO 12.6, -17.0/2.5/093 (SPHERE/CYLINDER/AXIS), IMPLANTABLE COLLAMER LENS WAS IMPLANTED AND REMOVED ON (B)(6) 2023 DUE TO THE LENS TEAR DURING INJECTION/DELIVERY INTO THE PATIENT'S LEFT (OS) EYE. THERE WAS PATIENT CONTACT (LENS TOUCHED THE EYE) WITH NO PATIENT INJURY. A NEW SAME SIZE LENS WITH SAME SIZE , SIMILARE (SPHERE/CYLINDER/AXIS) L…	-17.0/2.5/093	OS	Physician	05/24/2023	2023	22	Male
https://www.accessdata.fda.gov/scripts/cdrh/cfdocs/cfMAUDE/Detail.CFM?MDRFOI__ID=17138119&pc=QCB	2023826-2023-02312	2023-04-17 04:00:00	Injury	STAAR SURGICAL COMPANY	2023-06-15 04:00:00	QCB	IMPLANTABLE COLLAMER LENS (ICL)	Inadequacy of Device Shape and/or Size	Appropriate Clinical Signs, Symptoms, Conditions Term / Code Not Available	P030016	Event Description: THE REPORTER INDICATED THE SURGEON IMPLANTED A 12.6MM VTICM5_12.6 IMPLANTABLE COLLAMER LENS, -08.50/+2.0/110 (SPHERE/CYLINDER/AXIS), INTO THE PATIENTS RIGHT EYE (OD) ON (B)(6) 2023. THE LENS WAS REMOVED ON (B)(6) 2023 DUE TO EXCESSIVE VAULTING AND SIGNIFICANT REDUCTION OF IRIDO-CORNEAL ANGLES. THE LENS WAS REPLACED WITH A SHORTER LENS AND THE PROBLEM WAS RESOLVED. THE CAUSE OF …	-08.50/+2.0/110	OD	Other Health Care Professional	05/25/2023	2023	27	Male
https://www.accessdata.fda.gov/scripts/cdrh/cfdocs/cfMAUDE/Detail.CFM?MDRFOI__ID=17138218&pc=QCB	2023826-2023-02313	2023-04-17 04:00:00	Injury	STAAR SURGICAL COMPANY	2023-06-15 04:00:00	QCB	IMPLANTABLE COLLAMER LENS (ICL)	Inadequacy of Device Shape and/or Size	Appropriate Clinical Signs, Symptoms, Conditions Term / Code Not Available	P030016	Event Description: THE REPORTER INDICATED THE SURGEON IMPLANTED A 12.6MM VTICM5_12.6 IMPLANTABLE COLLAMER LENS, -09.00/+2.0/091 (SPHERE/CYLINDER/AXIS), INTO THE PATIENTS LEFT EYE (OS) ON (B)(6) 2023. THE LENS WAS REMOVED ON (B)(6) 2023 DUE TO EXCESSIVE VAULTING AND SIGNIFICANT REDUCTION OF IRIDO-CORNEAL ANGLES. THE LENS WAS REPLACED WITH A SHORTER LENS AND THE PROBLEM WAS RESOLVED. THE CAUSE OF T…	-09.00/+2.0/091	OS	Other Health Care Professional	05/25/2023	2023	27	Male
https://www.accessdata.fda.gov/scripts/cdrh/cfdocs/cfMAUDE/Detail.CFM?MDRFOI__ID=17210599&pc=QCB	2023826-2023-02598	2023-06-01 04:00:00	Malfunction	STAAR SURGICAL COMPANY	2023-06-27 04:00:00	QCB	IMPLANTABLE COLLAMER LENS (ICL)	Off-Label Use; Inadequacy of Device Shape and/or Size	Appropriate Clinical Signs, Symptoms, Conditions Term / Code Not Available	P030016	Event Description: THE REPORTER INDICATED THAT THE SURGEON IMPLANTED A 12.6MM VTICMO12.6; -5.0/2.0/075 (SPHERE/CYLINDER/AXIS) IMPLANTABLE COLLAMER LENS INTO THE PATIENT'S RIGHT EYE (OD) ON (B)(6) 2023. THE PATIENT EXPERIENCED EXCESSIVE VAULTING AND SIGNIFICANT REDUCTION OF IRIDO-CORNEAL ANGLES. INTRAOPERATIVELY THE LENS WAS REMOVED AND REPLACED WITH A SHORTER LENGTH LENS AND THIS RESOLVED THE PRO…	-5.0/2.0/075	OD	Physician	06/20/2023	2023	25	Male
https://www.accessdata.fda.gov/scripts/cdrh/cfdocs/cfMAUDE/Detail.CFM?MDRFOI__ID=17210601&pc=QCB	2023826-2023-02599	2023-03-24 04:00:00	Injury	STAAR SURGICAL COMPANY	2023-06-27 04:00:00	QCB	IMPLANTABLE COLLAMER LENS (ICL)	Off-Label Use; Inadequacy of Device Shape and/or Size	Appropriate Clinical Signs, Symptoms, Conditions Term / Code Not Available	P030016	Event Description: THE REPORTER INDICATED THAT THE SURGEON IMPLANTED A 13.2MM VTICMO13.2; -10/1.5/095 (SPHERE/CYLINDER/AXIS) IMPLANTABLE COLLAMER LENS INTO THE PATIENT'S RIGHT EYE (OD) ON (B)(6) 2020. THE PATIENT EXPERIENCED EXCESSIVE VAULTING AND SIGNIFICANT REDUCTION OF IRIDO-CORNEAL ANGLES. ON (B)(6) 2023 THE LENS WAS EXCHANGED WITH A SAME LENGTH LENS BUT IMPLANTED VERTICALLY, THIS RESOLVED TH…	-10/1.5/095	OD	Physician	06/24/2023	2023	33	Female
https://www.accessdata.fda.gov/scripts/cdrh/cfdocs/cfMAUDE/Detail.CFM?MDRFOI__ID=17210782&pc=QCB	2023826-2023-02536	2023-03-07 05:00:00	Injury	STAAR SURGICAL COMPANY	2023-06-27 04:00:00	QCB	IMPLANTABLE COLLAMER LENS (ICL)	Off-Label Use; Inadequacy of Device Shape and/or Size	Appropriate Clinical Signs, Symptoms, Conditions Term / Code Not Available	P030016	Event Description: THE REPORTER INDICATED THAT THE SURGEON IMPLANTED A 12.6MM VTICMO12.6 IMPLANTABLE COLLAMER LENS OF DIOPTER -7.0/+1.5/041 INTO THE PATIENT'S RIGHT EYE (OD) ON (B)(6)2023. THE LENS WAS EXCHANGED ON (B)(6)2023 FOR A SHORTER LENGTH LENS DUE TO EXCESSIVE VAULT AND SIGNIFICANT REDUCTION OF IRIDO-CORNEAL ANGLES. THIS RESOLVED THE PROBLEM. CAUSE OF EVENT REPORTED AS UNKNOWN. Manufactur…	-7.0/+1.5/041	OD	Physician	05/29/2023	2023	29	Female
https://www.accessdata.fda.gov/scripts/cdrh/cfdocs/cfMAUDE/Detail.CFM?MDRFOI__ID=17262464&pc=QCB	2023826-2023-02685	2023-05-16 04:00:00	Injury	STAAR SURGICAL COMPANY	2023-07-05 04:00:00	QCB	IMPLANTABLE COLLAMER LENS (ICL)	Inadequacy of Device Shape and/or Size	Appropriate Clinical Signs, Symptoms, Conditions Term / Code Not Available	P030016	Event Description: THE REPORTER INDICATED THAT THE SURGEON IMPLANTED A 12.6MM VTICM5_12.6 IMPLANTABLE COLLAMER LENS OF DIOPTER -14.0/+1.0/085 INTO THE PATIENT'S LEFT EYE (OS) ON (B)(6) 2023. THE LENS WAS EXCHANGED ON (B)(6) 2023 FOR A SHORTER LENGTH LENS DUE TO EXCESSIVE VAULT AND SIGNIFICANT REDUCTION OF IRIDO-CORNEAL ANGLES. THIS RESOLVED THE PROBLEM. CAUSE REPORTED AS UNKNOWN. Manufacturer Nar…	-14.0/+1.0/085	OS	Physician	06/06/2023	2023	23	Male
https://www.accessdata.fda.gov/scripts/cdrh/cfdocs/cfMAUDE/Detail.CFM?MDRFOI__ID=17279005&pc=QCB	2023826-2023-02613	2023-03-30 04:00:00	Injury	STAAR SURGICAL COMPANY	2023-07-07 04:00:00	QCB	IMPLANTABLE COLLAMER LENS (ICL)	Inadequacy of Device Shape and/or Size	Appropriate Clinical Signs, Symptoms, Conditions Term / Code Not Available	P030016	Event Description: THE REPORTER INDICATED THAT THE SURGEON IMPLANTED A 13.2MM VTICMO13.2, -3.50/3.5/177 (SPHERE/CYLINDER/AXIS), IMPLANTABLE COLLAMER LENS INTO THE PATIENT'S RIGHT EYE (OD) ON (B)(6) 2023. THE LENS WAS REPLACED WITH A SHORTER LENGTH LENS DUE TO SIGNIFICANT REDUCTION OF IRIDOCORNEAL ANGLES AND EXCESSIVE VAULT ON (B)(6) 2022. THIS RESOLVED THE PROBLEM. CAUSE OF THE EVENT IS REPORTED …	-3.50/3.5/177	OD	Physician	06/14/2023	2023	35	Male
https://www.accessdata.fda.gov/scripts/cdrh/cfdocs/cfMAUDE/Detail.CFM?MDRFOI__ID=17306185&pc=QCB	2023826-2023-02842	2023-06-03 04:00:00	Injury	STAAR SURGICAL COMPANY	2023-07-12 04:00:00	QCB	IMPLANTABLE COLLAMER LENS (ICL)	Inadequacy of Device Shape and/or Size	Appropriate Clinical Signs, Symptoms, Conditions Term / Code Not Available	P030016	Event Description: THE REPORTER INDICATED THAT A 12.1MM, VTICMO12.1 -12.0/3.5/016 (SPHERE/CYLINDER/AXIS) IMPLANTABLE COLLAMER LENS WAS IMPLANTED INTO THE PATIENTS LEFT EYE (OS) ON (B)(6) 2023. ON (B)(6) 2023 THE LENS WAS EXPLANTED DUE TO EXCESSIVE VAULT AND THE PROBLEM RESOLVED. CAUSE OF EVENT WAS UNKNOWN. FOR ADDITIONAL INFORMATION THE REPORTER STATED "VERY HIGH VAULT WITH ANGLE CLOSURE. SINCE 1…	-12.0/3.5/016	OS	Physician	06/15/2023	2023	29	Female
https://www.accessdata.fda.gov/scripts/cdrh/cfdocs/cfMAUDE/Detail.CFM?MDRFOI__ID=17337301&pc=QCB	2023826-2023-02930	2023-04-19 04:00:00	Injury	STAAR SURGICAL COMPANY	2023-07-17 04:00:00	QCB	IMPLANTABLE COLLAMER LENS (ICL)	Inadequacy of Device Shape and/or Size	Appropriate Clinical Signs, Symptoms, Conditions Term / Code Not Available	P030016	Event Description: THE REPORTER INDICATED THAT THE SURGEON IMPLANTED A 13.2MM VTICMO13.2 IMPLANTABLE COLLAMER LENS OF DIOPTER -13.0/+1.5/072 INTO THE PATIENT'S LEFT EYE (OS) ON (B)(6)2023. THE LENS WAS EXCHANGED ON (B)(6)2023 FOR A SHORTER LENGTH LENS DUE TO EXCESSIVE VAULT AND SIGNIFICANT REDUCTION OF IRIDO-CORNEAL ANGLES. THIS RESOLVED THE PROBLEM. CAUSE OF EVENT REPORTED AS UNKNOWN. Manufactur…	-13.0/+1.5/072	OS	Physician	06/25/2023	2023	26	Male
https://www.accessdata.fda.gov/scripts/cdrh/cfdocs/cfMAUDE/Detail.CFM?MDRFOI__ID=17344448&pc=QCB	2023826-2023-02858	2022-09-15 04:00:00	Malfunction	STAAR SURGICAL COMPANY	2023-07-18 04:00:00	QCB	IMPLANTABLE COLLAMER LENS (ICL)	No Apparent Adverse Event	Appropriate Clinical Signs, Symptoms, Conditions Term / Code Not Available	N/A	Event Description: THE REPORTER INDICATED THAT A 12.6MM,TMICL12.6, -15.0/2.5/120 (SPHERE/CYLINDER/AXIS), IMPLANTABLE COLLAMER LENS WAS IMPLANTED INTO THE PATIENT'S RIGHT EYE (OD) ON (B)(6) 2021. REFRACTIVE ASTIGMATISM WAS OBSERVED. THE LENS REMAINS IMPLANTED. CAUSE OF EVENT REPORTED AS DEVICE, LENS ROTATION. ADDITIONAL INFORMATION HAS BEEN REQUESTED BUT NONE HAS BEEN FORTHCOMING. Manufacturer Nar…	-15.0/2.5/120	OD	Physician	06/28/2023	2023	34	Male
https://www.accessdata.fda.gov/scripts/cdrh/cfdocs/cfMAUDE/Detail.CFM?MDRFOI__ID=17347859&pc=QCB	2023826-2023-02992	2023-06-20 04:00:00	Injury	STAAR SURGICAL COMPANY	2023-07-19 04:00:00	QCB	IMPLANTABLE COLLAMER LENS (ICL)	Inadequacy of Device Shape and/or Size	Appropriate Clinical Signs, Symptoms, Conditions Term / Code Not Available	P030016	Event Description: THE REPORTER INDICATED THAT 13.2MM VTICM5_13.2 IMPLANTABLE COLLAMER LENS OF -13.00/3.5/089 (SPHERE/CYLINDER/AXIS) WAS IMPLANTED INTO THE PATIENTS RIGHT EYE (OD) ON (B)(6) 2023. THE LENS HAD TO BE REMOVED AT THE TIME OF SURGERY DUE TO NOTICEABLY EXCESSIVE VAULT INTRAOPERATIVELY WITH SIGNIFICANT AC SHALLOWING AND IRIS PROLAPSE. THE LENS WAS REMOVED AND SURGERY WAS ABORTED WITHOUT…	-13.00/3.5/089	OD	Physician	06/21/2023	2023	23	Female
https://www.accessdata.fda.gov/scripts/cdrh/cfdocs/cfMAUDE/Detail.CFM?MDRFOI__ID=17366832&pc=QCB	2023826-2023-03091		Malfunction	STAAR SURGICAL COMPANY	2023-07-20 04:00:00	QCB	IMPLANTABLE COLLAMER LENS (ICL)	No Apparent Adverse Event	Appropriate Clinical Signs, Symptoms, Conditions Term / Code Not Available	P030016	Event Description: THE REPORTER INDICATED THAT THE SURGEON IMPLANTED A 12.6MM VTICM5_12.6; -4.50/2.0/090 (SPHERE/CYLINDER/AXIS) IMPLANTABLE COLLAMER LENS INTO THE PATIENT'S LEFT EYE (OS) ON (B)(6)2023 AS A REPLACEMENT LENS. IT WAS REPORTED THAT THE PATIENT IS "STILL PL-2.00X077" AND IT WAS INDICATED THERE IS RESIDUAL CYLINDER. LENS REMAINS IMPLANTED. Manufacturer Narrative: H6 - HEALTH EFFECT CLI…	-4.50/2.0/090	OS	Physician	06/27/2023	2023		Female
https://www.accessdata.fda.gov/scripts/cdrh/cfdocs/cfMAUDE/Detail.CFM?MDRFOI__ID=17372945&pc=QCB	2023826-2023-02890		Malfunction	STAAR SURGICAL COMPANY	2023-07-21 04:00:00	QCB	IMPLANTABLE COLLAMER LENS (ICL)	No Apparent Adverse Event	Appropriate Clinical Signs, Symptoms, Conditions Term / Code Not Available	P030016	Event Description: THE REPORTER INDICATED THE SURGEON IMPLANTED A 12.1MM VTICM5_12.1 IMPLANTABLE COLLAMER LENS, -09.50/+1.0/089 (SPHERE/CYLINDER/AXIS), INTO THE PATIENTS RIGHT EYE (OD) ON (B)(6) 2023. POST-OP, THE MYDRIASIS CONTINUED AFTER GLAUCOMA ATTACK. THE LENS REMAINED IMPLANTED AND THE PATIENT IS UNDER OBSERVATION. THIS WAS THE REPLACEMENT LENS FOR MFR. REPORT # 2023826-2023-02889. ADDITION…	-09.50/+1.0/089	OD	Physician	06/30/2023	2023
https://www.accessdata.fda.gov/scripts/cdrh/cfdocs/cfMAUDE/Detail.CFM?MDRFOI__ID=17377645&pc=QCB	2023826-2023-02962	2023-07-04 04:00:00	Malfunction	STAAR SURGICAL COMPANY	2023-07-24 04:00:00	QCB	IMPLANTABLE COLLAMER LENS (ICL)	Inadequacy of Device Shape and/or Size	Appropriate Clinical Signs, Symptoms, Conditions Term / Code Not Available	P030016	Event Description: THE REPORTER INDICATED THE SURGEON IMPLANTED A 13.2MM VTICM5_13.2 IMPLANTABLE COLLAMER LENS, -13.50/+2.0/091 (SPHERE/CYLINDER/AXIS), INTO THE PATIENTS RIGHT EYE (OD) ON (B)(6) 2023. THE LENS WAS REPORTED AS EXCESSIVE VAULTING AND SIGNIFICANT REDUCTION OF IRIDO-CORNEAL ANGLES. THE LENS REMAINED IMPLANTED. ADDITIONAL INFORMATION HAS BEEN REQUESTED BUT NONE HAS BEEN FORTHCOMING. M…	-13.50/+2.0/091	OD	Physician	07/07/2023	2023	47	Female
https://www.accessdata.fda.gov/scripts/cdrh/cfdocs/cfMAUDE/Detail.CFM?MDRFOI__ID=17385850&pc=QCB	2023826-2023-03156		Injury	STAAR SURGICAL COMPANY	2023-07-24 04:00:00	QCB	IMPLANTABLE COLLAMER LENS (ICL)	Device Dislodged or Dislocated; Optical Problem	Appropriate Clinical Signs, Symptoms, Conditions Term / Code Not Available	P030016	Event Description: THE REPORTER INDICATED THAT THE SURGEON IMPLANTED A 12.6MM VTICM5_12.6; -8.50/1.5/081 (SPHERE/CYLINDER/AXIS) IMPLANTABLE COLLAMER LENS INTO THE PATIENT'S LEFT EYE (OS) ON (B)(6) 2023. THE SURGEON NOTES "POST ROTATION CENTERING ON 16.5. THE PATIENT IS STILL EXPERIENCING SEVERE GLARE AND PERSISTENT TRIPLE IMAGES OS. THE EXISTING LENS WILL BE EXPLANTED SOON". LENS REMAINS IMPLANTE…	-8.50/1.5/081	OS	Other Health Care Professional	07/05/2023	2023
https://www.accessdata.fda.gov/scripts/cdrh/cfdocs/cfMAUDE/Detail.CFM?MDRFOI__ID=17391257&pc=QCB	2023826-2023-03032	2023-07-03 04:00:00	Injury	STAAR SURGICAL COMPANY	2023-07-25 04:00:00	QCB	IMPLANTABLE COLLAMER LENS (ICL)	Inadequacy of Device Shape and/or Size	Appropriate Clinical Signs, Symptoms, Conditions Term / Code Not Available	P030016	Event Description: THE REPORTER INDICATED THAT THE SURGEON IMPLANTED A 13.7MM VTICM5_13.7, -2.5/1.0/040 (SPHERE/CYLINDER/AXIS), IMPLANTABLE COLLAMER LENS INTO THE PATIENT'S LEFT EYE (OS) ON (B)(6) 2023. THE LENS WAS REPLACED WITH A SHORTER LENGTH LENS DUE TO EXCESSIVE VAULT ON (B)(6) 2023. THIS RESOLVED THE PROBLEM. CAUSE OF THE EVENT IS REPORTED AS UNKNOWN. Manufacturer Narrative: A4 - UNK. A5 -…	-2.5/1.0/040	OS	Physician	07/03/2023	2023	33	Female
https://www.accessdata.fda.gov/scripts/cdrh/cfdocs/cfMAUDE/Detail.CFM?MDRFOI__ID=17391260&pc=QCB	2023826-2023-03031	2023-07-03 04:00:00	Injury	STAAR SURGICAL COMPANY	2023-07-25 04:00:00	QCB	IMPLANTABLE COLLAMER LENS (ICL)	Inadequacy of Device Shape and/or Size	Appropriate Clinical Signs, Symptoms, Conditions Term / Code Not Available	P030016	Event Description: THE REPORTER INDICATED THAT THE SURGEON IMPLANTED A 13.7MM VTICM5_13.7, -2.5/1.0/117 (SPHERE/CYLINDER/AXIS), IMPLANTABLE COLLAMER LENS INTO THE PATIENT'S RIGHT EYE (OD) ON (B)(6) 2023. THE LENS WAS REPLACED WITH A SHORTER LENGTH LENS DUE TO UNREACTIVE(FIXED) PUPIL AND EXCESSIVE VAULT ON (B)(6) 2023. THIS RESOLVED THE PROBLEM. CAUSE OF THE EVENT IS REPORTED AS UNKNOWN. Manufactu…	-2.5/1.0/117	OD	Physician	07/03/2023	2023	33	Female
https://www.accessdata.fda.gov/scripts/cdrh/cfdocs/cfMAUDE/Detail.CFM?MDRFOI__ID=17486818&pc=QCB	2023826-2023-03264	2023-07-13 04:00:00	Malfunction	STAAR SURGICAL COMPANY	2023-08-09 04:00:00	QCB	IMPLANTABLE COLLAMER LENS (ICL)	Inadequacy of Device Shape and/or Size	Appropriate Clinical Signs, Symptoms, Conditions Term / Code Not Available	P030016	Event Description: THE REPORTER INDICATED THAT THE SURGEON IMPLANTED A 13.2MM VTICM5_13.2, -12.0/2.5/112 (SPHERE/CYLINDER/AXIS), IMPLANTABLE COLLAMER LENS INTO THE PATIENT'S RIGHT EYE (OD) ON (B)(6) 2023. SIGNIFICANT REDUCTION OF IRIDO-CORNEAL ANGLES AND EXCESSIVE VAULT HAVE BEEN OBSERVED. LENS REMAINS IMPLANTED. ADDITIONAL INFORMATION HAS BEEN REQUESTED BUT NONE HAS BEEN FORTHCOMING. Manufacture…	-12.0/2.5/112	OD	Physician	07/17/2023	2023	34	Female
https://www.accessdata.fda.gov/scripts/cdrh/cfdocs/cfMAUDE/Detail.CFM?MDRFOI__ID=17493561&pc=QCB	2023826-2023-03435	2023-06-26 04:00:00	Injury	STAAR SURGICAL COMPANY	2023-08-09 04:00:00	QCB	IMPLANTABLE COLLAMER LENS (ICL)	Patient-Device Incompatibility	Appropriate Clinical Signs, Symptoms, Conditions Term / Code Not Available	P030016	Event Description: THE REPORTER INDICATED THAT A 13.2MM VTICMO 13.2 IMPLANTABLE COLLAMER LENS OF -12.0/2.0/108 (SPHERE/CYLINDER/AXIS) WAS IMPLANTED INTO THE PATIENT'S LEFT EYE (OS) ON (B)(6) 2023. ON (B)(6) 2023 THE LENS WAS REMOVED DUE TO PATIENT SUFFERING FROM PSYCHOLOGICAL ANXIETY, COULD NOT SLEEP, AND SUFFERED FROM SEVERE NEURASTHENIA. REPORTEDLY AFTER THE ICL LENS IMPLANTATION, THE PATIENT H…	-12.0/2.0/108	OS	Physician	08/07/2023	2023	40	Female
https://www.accessdata.fda.gov/scripts/cdrh/cfdocs/cfMAUDE/Detail.CFM?MDRFOI__ID=17558286&pc=QCB	2023826-2023-03477	2023-06-19 04:00:00	Malfunction	STAAR SURGICAL COMPANY	2023-08-16 04:00:00	QCB	IMPLANTABLE COLLAMER LENS (ICL)	Off-Label Use; Inadequacy of Device Shape and/or Size	Appropriate Clinical Signs, Symptoms, Conditions Term / Code Not Available	P030016	Event Description: THE REPORTER INDICATED THAT THE SURGEON IMPLANTED A 12.6MM VTICMO2.6 IMPLANTABLE COLLAMER LENS OF DIOPTER -12.0/+2.0/089 INTO THE PATIENT'S LEFT EYE (OS) ON (B)(6) 2023. WITHIN THE INITIAL SURGERY THE LENS WAS REMOVED AND REPLACED INTRA-OPERATIVELY FOR A SHORTER LENGTH LENS DUE TO EXCESSIVE VAULT. SIGNIFICANT REDUCTION OF IRIDO-CORNEAL ANGLES WAS ALSO NOTED. THE PROBLEM WAS RES…	-12.0/+2.0/089	OS	Physician	07/21/2023	2023	18	Male
https://www.accessdata.fda.gov/scripts/cdrh/cfdocs/cfMAUDE/Detail.CFM?MDRFOI__ID=17558287&pc=QCB	2023826-2023-03474	2023-07-18 04:00:00	Injury	STAAR SURGICAL COMPANY	2023-08-16 04:00:00	QCB	IMPLANTABLE COLLAMER LENS (ICL)	Inadequacy of Device Shape and/or Size	Appropriate Clinical Signs, Symptoms, Conditions Term / Code Not Available	P030016	Event Description: THE REPORTER INDICATED THAT THE SURGEON IMPLANTED A 13.2MM VTICM5_13.2 IMPLANTABLE COLLAMER LENS OF DIOPTER -8.0/+1.0/033 INTO THE PATIENT'S LEFT EYE (OS) ON (B)(6) 2023. THE LENS WAS EXCHANGED ON (B)(6) 2023 FOR A SHORTER LENGTH LENS DUE TO EXCESSIVE VAULT AND SIGNIFICANT REDUCTION OF IRIDO-CORNEAL ANGLES. THIS RESOLVED THE PROBLEM. CAUSE OF EVENT REPORTED AS UNKNOWN. Manufact…	-8.0/+1.0/033	OS	Physician	07/20/2023	2023	48	Male
https://www.accessdata.fda.gov/scripts/cdrh/cfdocs/cfMAUDE/Detail.CFM?MDRFOI__ID=17591893&pc=QCB	2023826-2023-03642	2023-07-24 04:00:00	Injury	STAAR SURGICAL COMPANY	2023-08-21 04:00:00	QCB	IMPLANTABLE COLLAMER LENS (ICL)	Inadequacy of Device Shape and/or Size	Appropriate Clinical Signs, Symptoms, Conditions Term / Code Not Available	P030016	Event Description: THE REPORTER INDICATED THAT THE SURGEON IMPLANTED A 13.2MM VTICMO13.2; -17.0/2.50/93 (SPHERE/CYLINDER/AXIS) IMPLANTABLE COLLAMER LENS INTO THE PATIENT'S RIGHT EYE (OD) ON (B)(6) 2023. THE PATIENT EXPERIENCED EXCESSIVE VAULTING AND SIGNIFICANT REDUCTION IRIDO-CORNEAL ANGLES. ON (B)(6) 2023 THE LENS WAS EXPLANTED AND REPLACED WITH A SHORTER LENGTH LENS. THIS RESOLVED THE PROBLEM.…	-17.0/2.50/93	OD	Physician	07/25/2023	2023	22	Male
https://www.accessdata.fda.gov/scripts/cdrh/cfdocs/cfMAUDE/Detail.CFM?MDRFOI__ID=17619509&pc=QCB	2023826-2023-03706	2023-07-15 04:00:00	Injury	STAAR SURGICAL COMPANY	2023-08-24 04:00:00	QCB	IMPLANTABLE COLLAMER LENS (ICL)	Misfocusing; Off-Label Use	Appropriate Clinical Signs, Symptoms, Conditions Term / Code Not Available	P030016	Event Description: THE REPORTER INDICATED THAT THE SURGEON IMPLANTED A 12.6MM VTICMO12.6; -13.5/1.5/011 (SPHERE/CYLINDER/AXIS) IMPLANTABLE COLLAMER LENS INTO THE PATIENT'S LEFT EYE (OS) ON (B)(6)2023. THE PATIENT EXPERIENCED TRANSIENT LOSS OF BCVA. ON (B)(6) 2023, THE LENS WAS EXCHANGED WITH A SAME LENGTH BUT DIFFERENT POWER LENS AND THE PROBLEM WAS RESOLVED. THE CAUSE OF THE EVENT WAS REPORTED A…	-13.5/1.5/011	OS	Physician	08/01/2023	2023	18	Male
https://www.accessdata.fda.gov/scripts/cdrh/cfdocs/cfMAUDE/Detail.CFM?MDRFOI__ID=17655763&pc=QCB	2023826-2023-03798	2023-04-27 04:00:00	Injury	STAAR SURGICAL COMPANY	2023-08-30 04:00:00	QCB	IMPLANTABLE COLLAMER LENS (ICL)	Off-Label Use; Inadequacy of Device Shape and/or Size	Appropriate Clinical Signs, Symptoms, Conditions Term / Code Not Available	P030016	Event Description: THE REPORTER INDICATED THAT THE SURGEON IMPLANTED A 13.2MM VTICM5_13.2; -4.5/1.0/153 (SPHERE/CYLINDER/AXIS) IMPLANTABLE COLLAMER LENS INTO THE PATIENT'S LEFT EYE (OS) ON (B)(6) 2023. THE SURGEON REPORTS THERE WAS SHALLOW CHAMBER, EXCESSIVE VAULTING, SIGNIFICANT REDUCTION OF IRIDO-CORNEAL ANGLES, AND ON (B)(6) 2023 THE LENS WAS EXPLANTED AND LATER ON THIS SAME DATE REPLACED WITH…	-4.5/1.0/153	OS	Physician	08/24/2023	2023	42	Male
https://www.accessdata.fda.gov/scripts/cdrh/cfdocs/cfMAUDE/Detail.CFM?MDRFOI__ID=17657030&pc=QCB	2023826-2023-03757	2023-06-18 04:00:00	Injury	STAAR SURGICAL COMPANY	2023-08-30 04:00:00	QCB	IMPLANTABLE COLLAMER LENS (ICL)	Inadequacy of Device Shape and/or Size	Appropriate Clinical Signs, Symptoms, Conditions Term / Code Not Available	P030016	Event Description: THE REPORTER INDICATED THAT THE SURGEON IMPLANTED A 13.2MM VTICMO13.2 IMPLANTABLE COLLAMER LENS OF DIOPTER -12.0/+2.5/091 INTO THE PATIENT'S RIGHT EYE (OD) ON (B)(6) 2023. THE LENS WAS EXCHANGED ON (B)(6) 2023 FOR A SHORTER LENGTH LENS DUE TO EXCESSIVE VAULT AND SIGNIFICANT REDUCTION OF IRIDO-CORNEAL ANGLES. THIS RESOLVED THE PROBLEM. CAUSE OF EVENT REPORTED AS UNKNOWN. Manufac…	-12.0/+2.5/091	OD	Physician	08/05/2023	2023	22	Female
https://www.accessdata.fda.gov/scripts/cdrh/cfdocs/cfMAUDE/Detail.CFM?MDRFOI__ID=17669066&pc=QCB	2023826-2023-03735	2023-08-09 04:00:00	Injury	STAAR SURGICAL COMPANY	2023-09-01 04:00:00	QCB	IMPLANTABLE COLLAMER LENS (ICL)	Inadequacy of Device Shape and/or Size	Appropriate Clinical Signs, Symptoms, Conditions Term / Code Not Available	P030016	Event Description: THE REPORTER INDICATED THAT THE SURGEON IMPLANTED A 13.7MM VTICMO13.7, -12.0/2.0/095 (SPHERE/CYLINDER/AXIS), IMPLANTABLE COLLAMER LENS INTO THE PATIENT'S RIGHT EYE (OD) ON (B)(6) 2023. THE LENS WAS EXCHANGED WITH A SHORTER LENGTH LENS DUE TO SIGNIFICANT REDUCTION OF IRIDO-CORNEAL ANGELS AND EXCESSIVE VAULT ON (B)(6) 2023. THIS RESOLVED THE PROBLEM. CAUSE OF THE EVENT IS REPORTE…	-12.0/2.0/095	OD	Physician	08/15/2023	2023	28	Female
https://www.accessdata.fda.gov/scripts/cdrh/cfdocs/cfMAUDE/Detail.CFM?MDRFOI__ID=17674681&pc=QCB	2023826-2023-03765	2023-07-14 04:00:00	Injury	STAAR SURGICAL COMPANY	2023-09-01 04:00:00	QCB	IMPLANTABLE COLLAMER LENS (ICL)	Off-Label Use; Inadequacy of Device Shape and/or Size	Appropriate Clinical Signs, Symptoms, Conditions Term / Code Not Available	P030016	Event Description: THE REPORTER INDICATED THAT THE SURGEON IMPLANTED A 13.2MM VTICMO13.2 IMPLANTABLE COLLAMER LENS OF DIOPTER -11.0/+2.5/071 INTO THE PATIENT'S LEFT EYE (OS) ON (B)(6) 2023. THE LENS WAS EXCHANGED ON (B)(6) 2023 FOR A SHORTER LENGTH LENS DUE TO EXCESSIVE VAULT AND SIGNIFICANT REDUCTION OF IRIDO-CORNEAL ANGLES. THIS RESOLVED THE PROBLEM. CAUSE OF EVENT REPORTED AS UNKNOWN. Manufact…	-11.0/+2.5/071	OS	Physician	08/07/2023	2023	19	Female
https://www.accessdata.fda.gov/scripts/cdrh/cfdocs/cfMAUDE/Detail.CFM?MDRFOI__ID=17704773&pc=QCB	2023826-2023-03952	2023-05-21 04:00:00	Injury	STAAR SURGICAL COMPANY	2023-09-07 04:00:00	QCB	IMPLANTABLE COLLAMER LENS (ICL)	Adverse Event Without Identified Device or Use Problem	Appropriate Clinical Signs, Symptoms, Conditions Term / Code Not Available	P030016	Event Description: THE REPORTER INDICATED THAT THE SURGEON IMPLANTED A 12.6MM VTICM5_12.6; -7.0/+1.5/4 (SPHERE/CYLINDER/AXIS) IMPLANTABLE COLLAMER LENS INTO THE PATIENT'S RIGHT EYE (OD) ON (B)(6) 2023. THE SURGEON EXPLANTED THE LENS ON (B)(6) 2023, DUE TO THE PATIENT HAVING DISSATISFACTION AND FOREIGN BODY SENSATION. THIS RESOLVED THE PROBLEM. Manufacturer Narrative: B5 - THE REPORTER INDICATED T…	-7.0/+1.5/4	OD	Physician	08/29/2023	2023		Male
https://www.accessdata.fda.gov/scripts/cdrh/cfdocs/cfMAUDE/Detail.CFM?MDRFOI__ID=17741413&pc=QCB	2023826-2023-03698	2023-07-12 04:00:00	Injury	STAAR SURGICAL COMPANY	2023-09-13 04:00:00	QCB	IMPLANTABLE COLLAMER LENS (ICL)	Inadequacy of Device Shape and/or Size	Appropriate Clinical Signs, Symptoms, Conditions Term / Code Not Available	P030016	Event Description: THE REPORTER INDICATED THAT A 12.6MM VTICM5 12.6 IMPLANTABLE COLLAMER LENS OF -8.00/1.0/021 (SPHERE/CYLINDER/AXIS) WAS IMPLANTED INTO THE PATIENTS RIGHT EYE (OD) ON (B)(6) 2023. EXCESSIVE VAULT WAS OBSERVED. ON (B)(6) 2023 THE LENS WAS EXCHANGED FOR A SMALLER SIZE AND THE PROBLEM WAS RESOLVED. CAUSE REPORTED AS DEVICE. Manufacturer Narrative: CLAIM#: (B)(4).	-8.00/1.0/021	OD	Physician	08/16/2023	2023	34	Female
https://www.accessdata.fda.gov/scripts/cdrh/cfdocs/cfMAUDE/Detail.CFM?MDRFOI__ID=17741535&pc=QCB	2023826-2023-03699	2023-07-12 04:00:00	Injury	STAAR SURGICAL COMPANY	2023-09-13 04:00:00	QCB	IMPLANTABLE COLLAMER LENS (ICL)	Inadequacy of Device Shape and/or Size	Appropriate Clinical Signs, Symptoms, Conditions Term / Code Not Available	P030016	Event Description: THE REPORTER INDICATED THAT A 12.6MM VTICM5 12.6 IMPLANTABLE COLLAMER LENS OF -8.00/1.0/169 (SPHERE/CYLINDER/AXIS) WAS IMPLANTED INTO THE PATIENTS LEFT EYE (OS) ON (B)(6) 2023. EXCESSIVE VAULT WAS OBSERVED. ON (B)(6) 2023 THE LENS WAS EXCHANGED FOR A SMALLER SIZE AND THE PROBLEM WAS RESOLVED. CAUSE REPORTED AS DEVICE. Manufacturer Narrative: (B)(4).	-8.00/1.0/169	OS	Physician	08/16/2023	2023	34	Female
https://www.accessdata.fda.gov/scripts/cdrh/cfdocs/cfMAUDE/Detail.CFM?MDRFOI__ID=17754468&pc=QCB	2023826-2023-04071	2023-07-14 04:00:00	Injury	STAAR SURGICAL COMPANY	2023-09-15 04:00:00	QCB	IMPLANTABLE COLLAMER LENS (ICL)	Inadequacy of Device Shape and/or Size	Appropriate Clinical Signs, Symptoms, Conditions Term / Code Not Available	P030016	Event Description: THE REPORTER INDICATED THAT THE SURGEON IMPLANTED A 13.2MM VTICM5_13.2, -2.5/1.0/113 (SPHERE/CYLINDER/AXIS), IMPLANTABLE COLLAMER LENS INTO THE PATIENT'S RIGHT EYE (OD) ON (B)(6) 2023. THE LENS WAS EXPLANTED DUE TO SIGNIFICANT REDUCTION OF IRIDOCORNEAL ANGLES AND EXCESSIVE VAULT ON (B)(6) 2023. THIS RESOLVED THE PROBLEM. CAUSE OF THE EVENT IS REPORTED AS UNKNOWN. REPORTEDLY, LE…	-2.5/1.0/113	OD	Physician	08/17/2023	2023	33	Female
https://www.accessdata.fda.gov/scripts/cdrh/cfdocs/cfMAUDE/Detail.CFM?MDRFOI__ID=17755067&pc=QCB	2023826-2023-03983	2023-08-23 04:00:00	Injury	STAAR SURGICAL COMPANY	2023-09-15 04:00:00	QCB	IMPLANTABLE COLLAMER LENS (ICL)	Off-Label Use; No Apparent Adverse Event	Appropriate Clinical Signs, Symptoms, Conditions Term / Code Not Available	P030016	Event Description: THE REPORTER INDICATED THE SURGEON IMPLANTED A 12.5MM TICM125V4 IMPLANTABLE COLLAMER LENS, -09.50/+3.5/084 (SPHERE/CYLINDER/AXIS), IN THE PATIENTS LEFT EYE (OS), ON (B)(6) 2014. THE PATIENT EXPERIENCED REFRACTIVE CHANGE OVERTIME. THE LENS REMAINED IMPLANTED. THE CAUSE OF THE EVENT WAS UNKNOWN. Manufacturer Narrative: IT WAS LATER REPORTED THAT ON (B)(6) 2023 THE LENS WAS EXPLAN…	-09.50/+3.5/084	OS	Physician	08/23/2023	2023	28	Female
https://www.accessdata.fda.gov/scripts/cdrh/cfdocs/cfMAUDE/Detail.CFM?MDRFOI__ID=17761233&pc=QCB	2023826-2023-04076		Malfunction	STAAR SURGICAL COMPANY	2023-09-15 04:00:00	QCB	IMPLANTABLE COLLAMER LENS (ICL)	Off-Label Use; Adverse Event Without Identified Device or Use Problem	Appropriate Clinical Signs, Symptoms, Conditions Term / Code Not Available	P030016	Event Description: THE REPORTER INDICATED THAT THE SURGEON IMPLANTED A 12.1MM VTICMO12.6, -9.5/3.0/071 (SPHERE/CYLINDER/AXIS) IMPLANTABLE COLLAMER LENS INTO THE PATIENT'S RIGHT EYE (OD) ON (B)(6) 2023 AS A REPLACEMENT LENS COMPLAINT. IT WAS INDICATED THAT THE PATIENT HAS MILD PHOTOPHOBIA BUT WITH CLEAR VISION AND THE EYE IS IN REALLY GOOD CONDITION. LENS REMAINS IMPLANTED. Manufacturer Narrative:…	-9.5/3.0/071	OD	Physician	09/14/2023	2023		Female
https://www.accessdata.fda.gov/scripts/cdrh/cfdocs/cfMAUDE/Detail.CFM?MDRFOI__ID=17770484&pc=QCB	2023826-2023-04123		Malfunction	STAAR SURGICAL COMPANY	2023-09-18 04:00:00	QCB	IMPLANTABLE COLLAMER LENS (ICL)	Adverse Event Without Identified Device or Use Problem	Appropriate Clinical Signs, Symptoms, Conditions Term / Code Not Available	P030016	Event Description: THE REPORTER INDICATED THAT THE SURGEON IMPLANTED A 12.1MM VTICMO12.6, -9.0/2.0/070 (SPHERE/CYLINDER/AXIS) IMPLANTABLE COLLAMER LENS INTO THE PATIENT'S LEFT EYE (OS) ON (B)(6)2023 AS A REPLACEMENT LENS COMPLAINT. IT WAS INDICATED THAT THE PATIENT HAS MILD PHOTOPHOBIA BUT WITH CLEAR VISION. "NO SUPPLEMENTATION". LENS REMAINS IMPLANTED. Manufacturer Narrative: B5 - THE REPORTER I…	-9.0/2.0/070	OS	Physician	09/14/2023	2023		Female
https://www.accessdata.fda.gov/scripts/cdrh/cfdocs/cfMAUDE/Detail.CFM?MDRFOI__ID=17770486&pc=QCB	2023826-2023-04101	2023-03-29 04:00:00	Malfunction	STAAR SURGICAL COMPANY	2023-09-18 04:00:00	QCB	IMPLANTABLE COLLAMER LENS (ICL)	Inadequacy of Device Shape and/or Size	Appropriate Clinical Signs, Symptoms, Conditions Term / Code Not Available	P030016	Event Description: THE REPORTER INDICATED THAT THE SURGEON IMPLANTED A 12.6MM VTICM5_12.6, -8.5/+0.5/145 (SPHERE/CYLINDER/AXIS) IMPLANTABLE COLLAMER LENS INTO THE PATIENT'S RIGHT EYE (OD) ON (B)(6) 2023. THE SURGEON REPORTS THERE IS LOW VAULTING AND THERE WAS DECREASED NEAR VISION IN BRIGHT LIGHT. LENS REMAINS IMPLANTED WITH A PLANNED LENS EXCHANGED. THE CAUSE OF THE EVENT WAS REPORTED AS OTHER A…	-8.5/+0.5/145	OD	Other Health Care Professional	09/04/2023	2023	35	Male
https://www.accessdata.fda.gov/scripts/cdrh/cfdocs/cfMAUDE/Detail.CFM?MDRFOI__ID=17822037&pc=QCB	2023826-2023-04303	2023-09-09 04:00:00	Injury	STAAR SURGICAL COMPANY	2023-09-26 04:00:00	QCB	IMPLANTABLE COLLAMER LENS (ICL)	Adverse Event Without Identified Device or Use Problem	Appropriate Clinical Signs, Symptoms, Conditions Term / Code Not Available	P030016	Event Description: THE REPORTER INDICATED THAT THE SURGEON IMPLANTED A 12.1MM VTICM5_12.1, -7.50/-1.5/102 (SPHERE/CYLINDER/AXIS) IMPLANTABLE COLLAMER LENS INTO THE PATIENT'S RIGHT EYE (OD) ON (B)(6) 2023. THE PATIENT EXPERIENCED PIGMENT DISPERSION AND DILATED PUPIL. LENS REMAINS IMPLANTED. IT WAS INDICATED THE PATIENT WILL JUST BE MONITORED FOR NOW. THE CAUSE OF THE EVENT WAS REPORTED AS UNKNOWN.…	-7.50/-1.5/102	OD	Physician	09/11/2023	2023	29	Female
https://www.accessdata.fda.gov/scripts/cdrh/cfdocs/cfMAUDE/Detail.CFM?MDRFOI__ID=17822040&pc=QCB	2023826-2023-04302	2023-08-20 04:00:00	Injury	STAAR SURGICAL COMPANY	2023-09-26 04:00:00	QCB	IMPLANTABLE COLLAMER LENS (ICL)	Adverse Event Without Identified Device or Use Problem	Appropriate Clinical Signs, Symptoms, Conditions Term / Code Not Available	P030016	Event Description: THE REPORTER INDICATED THAT THE SURGEON IMPLANTED A 12.1MM VTICM5_12.1, -9.50/2.50/76 (SPHERE/CYLINDER/AXIS) IMPLANTABLE COLLAMER LENS INTO THE PATIENT'S LEFT EYE (OS) ON (B)(6) 2023. THE PATIENT EXPERIENCED PIGMENT DISPERSION AND DILATED PUPIL. LENS REMAINS IMPLANTED. IT WAS INDICATED THE PATIENT WILL JUST BE MONITORED FOR NOW. THE CAUSE OF THE EVENT WAS REPORTED AS UNKNOWN. I…	-9.50/2.50/76	OS	Physician	09/11/2023	2023	26	Female
https://www.accessdata.fda.gov/scripts/cdrh/cfdocs/cfMAUDE/Detail.CFM?MDRFOI__ID=17822377&pc=QCB	2023826-2023-04292	2023-07-13 04:00:00	Injury	STAAR SURGICAL COMPANY	2023-09-26 04:00:00	QCB	IMPLANTABLE COLLAMER LENS (ICL)	Off-Label Use; Inadequacy of Device Shape and/or Size	Appropriate Clinical Signs, Symptoms, Conditions Term / Code Not Available	P030016	Event Description: THE REPORTER INDICATED THAT THE SURGEON IMPLANTED A 13.2MM VTICMO13.2 IMPLANTABLE COLLAMER LENS OF DIOPTER -7.5/+2.5/086 INTO THE PATIENT'S RIGHT EYE (OD) ON (B)(6) 2023. THE LENS WAS EXCHANGED ON (B)(6) 2023 FOR A SHORTER LENGTH LENS DUE TO EXCESSIVE VAULT AND SIGNIFICANT REDUCTION OF IRIDO-CORNEAL ANGLES. THIS RESOLVED THE PROBLEM. CAUSE OF EVENT REPORTED AS UNKNOWN. Manufact…	-7.5/+2.5/086	OD	Physician	08/31/2023	2023	18	Female
https://www.accessdata.fda.gov/scripts/cdrh/cfdocs/cfMAUDE/Detail.CFM?MDRFOI__ID=17847262&pc=QCB	2023826-2023-04323	2023-09-03 04:00:00	Injury	STAAR SURGICAL COMPANY	2023-09-29 04:00:00	QCB	IMPLANTABLE COLLAMER LENS (ICL)	Inadequacy of Device Shape and/or Size	Appropriate Clinical Signs, Symptoms, Conditions Term / Code Not Available	P030016	Event Description: THE REPORTER INDICATED THAT THE SURGEON IMPLANTED A 13.2MM VTICMO13.2 IMPLANTABLE COLLAMER LENS OF DIOPTER -16.5/+3.0/089 INTO THE PATIENT'S RIGHT EYE (OD) ON (B)(6) 2023. THE LENS WAS EXCHANGED ON (B)(6) 2023 FOR A SHORTER LENGTH LENS DUE TO EXCESSIVE VAULT AND SIGNIFICANT REDUCTION OF IRIDO-CORNEAL ANGLES. THIS RESOLVED THE PROBLEM. CAUSE OF EVENT REPORTED AS UNKNOWN. Manufac…	-16.5/+3.0/089	OD	Physician	09/04/2023	2023	36	Male
https://www.accessdata.fda.gov/scripts/cdrh/cfdocs/cfMAUDE/Detail.CFM?MDRFOI__ID=17858049&pc=QCB	2023826-2023-04329	2023-08-08 04:00:00	Injury	STAAR SURGICAL COMPANY	2023-10-02 04:00:00	QCB	IMPLANTABLE COLLAMER LENS (ICL)	Off-Label Use; Inadequacy of Device Shape and/or Size	Appropriate Clinical Signs, Symptoms, Conditions Term / Code Not Available	P030016	Event Description: THE REPORTER INDICATED THAT THE SURGEON IMPLANTED A 12.6MM VTICMO12.6 IMPLANTABLE COLLAMER LENS OF DIOPTER -7.0/+1.5/041 INTO THE PATIENT'S RIGHT EYE (OD) ON (B)(6) 2023. THE LENS WAS EXCHANGED ON (B)(6) 2023 FOR A SHORTER LENGTH LENS DUE TO EXCESSIVE VAULT AND SIGNIFICANT REDUCTION OF IRIDO-CORNEAL ANGLES. THIS RESOLVED THE PROBLEM. CAUSE OF EVENT REPORTED AS UNKNOWN. Manufact…	-7.0/+1.5/041	OD	Physician	09/07/2023	2023	18	Female
https://www.accessdata.fda.gov/scripts/cdrh/cfdocs/cfMAUDE/Detail.CFM?MDRFOI__ID=17862023&pc=QCB	2023826-2023-04067	2023-03-22 04:00:00	Injury	STAAR SURGICAL COMPANY	2023-10-03 04:00:00	QCB	IMPLANTABLE COLLAMER LENS (ICL)	Inadequacy of Device Shape and/or Size	Appropriate Clinical Signs, Symptoms, Conditions Term / Code Not Available	P030016	Event Description: THE REPORTER INDICATED THAT THE SURGEON IMPLANTED A 12.6MM VTICMO12.6, -17.0/2.0/127 (SPHERE/CYLINDER/AXIS), IMPLANTABLE COLLAMER LENS INTO THE PATIENT'S RIGHT EYE (OD) ON (B)(6) 2023. EXCESSIVE VAULT, SIGNIFICANT REDUCTION OF IRIDOCORNEAL ANGLES, AND REDUCED AC DEPTH; MID-DILATED BUT RESPONSIVE PUPIL WAS OBSERVED. LENS REMAINS IMPLANTED. CAUSE OF THE EVENT IS REPORTED AS DEVIC…	-17.0/2.0/127	OD	Physician	09/12/2023	2023	37	Male
https://www.accessdata.fda.gov/scripts/cdrh/cfdocs/cfMAUDE/Detail.CFM?MDRFOI__ID=17885043&pc=QCB	2023826-2023-04318	2023-04-07 04:00:00	Injury	STAAR SURGICAL COMPANY	2023-10-06 04:00:00	QCB	IMPLANTABLE COLLAMER LENS (ICL)	Inadequacy of Device Shape and/or Size	Appropriate Clinical Signs, Symptoms, Conditions Term / Code Not Available	P030016	Event Description: THE REPORTER INDICATED THE SURGEON IMPLANTED A 12.6MM VTICMO12.6 IMPLANTABLE COLLAMER LENS, -12.00/+3.0/095 (SPHERE/CYLINDER/AXIS), IN THE PATIENTS LEFT EYE (OS), ON (B)(6) 2023. THE LENS WAS EXPLANTED ON (B)(6) 2023 DUE TO EXCESSIVE VAULTING, SIGNIFICANT REDUCTION OF IRIDO-CORNEAL ANGLES AND PIGMENT DISPERSION. THE LENS WAS REPLACED WITH A SHORTER LENS AND THE PROBLEM WAS RESO…	-12.00/+3.0/095	OS	Physician	09/14/2023	2023	24	Female
https://www.accessdata.fda.gov/scripts/cdrh/cfdocs/cfMAUDE/Detail.CFM?MDRFOI__ID=17894979&pc=QCB	2023826-2023-04389	2023-09-01 04:00:00	Injury	STAAR SURGICAL COMPANY	2023-10-09 04:00:00	QCB	IMPLANTABLE COLLAMER LENS (ICL)	Device Dislodged or Dislocated	Appropriate Clinical Signs, Symptoms, Conditions Term / Code Not Available	P030016	Event Description: THE REPORTER INDICATED THE SURGEON IMPLANTED A 12.1MM VTICMO12.1 IMPLANTABLE COLLAMER LENS, -18.00/+4.0/112 (SPHERE/CYLINDER/AXIS), INTO THE PATIENTS RIGHT EYE (OD) ON (B)(6) 2023. THE LENS WAS REMOVED ON ((B)(6) 2023 DUE TO LENS ROTATION (LENS DISLOCATION/SUBLUXATION), PIGMENT DISPERSION AND REFRACTIVE CHANGE OVERTIME. THE INCISION WAS ENLARGED AND A SUTURE WAS REQUIRED. THE L…	-18.00/+4.0/112	OD	Other Health Care Professional	09/15/2023	2023	22	Male
https://www.accessdata.fda.gov/scripts/cdrh/cfdocs/cfMAUDE/Detail.CFM?MDRFOI__ID=17916953&pc=QCB	2023826-2023-04400	2023-09-05 04:00:00	Injury	STAAR SURGICAL COMPANY	2023-10-11 04:00:00	QCB	IMPLANTABLE COLLAMER LENS (ICL)	Inadequacy of Device Shape and/or Size	Appropriate Clinical Signs, Symptoms, Conditions Term / Code Not Available	P030016	Event Description: THE REPORTER INDICATED THE SURGEON IMPLANTED A 13.2MM VTICM5_13.2 IMPLANTABLE COLLAMER LENS, -09.00/+1.0/105 (SPHERE/CYLINDER/AXIS), INTO THE PATIENTS RIGHT EYE (OD) ON (B)(6) 2023. THE LENS WAS REMOVED ON (B)(6) 2023 DUE TO EXCESSIVE VAULTING AND SIGNIFICANT REDUCTION OF IRIDO-CORNEAL ANGLES. THE LENS WAS REPLACED WITH A SHORTER LENS AND THE PROBLEM WAS RESOLVED. THE CAUSE OF …	-09.00/+1.0/105	OD	Physician	09/22/2023	2023	24	Female
https://www.accessdata.fda.gov/scripts/cdrh/cfdocs/cfMAUDE/Detail.CFM?MDRFOI__ID=17944001&pc=QCB	2023826-2023-04577	2023-09-19 04:00:00	Injury	STAAR SURGICAL COMPANY	2023-10-16 04:00:00	QCB	IMPLANTABLE COLLAMER LENS (ICL)	Inadequacy of Device Shape and/or Size	Appropriate Clinical Signs, Symptoms, Conditions Term / Code Not Available	P030016	Event Description: THE REPORTER INDICATED THAT THE SURGEON IMPLANTED A 13.2MM VTICM5_13.2; -8/+2.0/89 (SPHERE/CYLINDER/AXIS) IMPLANTABLE COLLAMER LENS INTO THE PATIENT'S LEFT EYE (OS) ON (B)(6) 2023. THE SURGEON NOTES THE PATIENT HAD EXCESSIVE VAULTING AND SIGNIFICANT REDUCTION OF IRIDO-CORNEAL ANGLES. ON (B)(6) 2023 THE LENS WAS EXCHANGED WITH A SHORTER LENGTH LENS. THE CAUSE OF THE EVENT WAS RE…	-8/+2.0/89	OS	Physician	09/22/2023	2023	35	Female
https://www.accessdata.fda.gov/scripts/cdrh/cfdocs/cfMAUDE/Detail.CFM?MDRFOI__ID=17944027&pc=QCB	2023826-2023-04576	2023-09-19 04:00:00	Injury	STAAR SURGICAL COMPANY	2023-10-16 04:00:00	QCB	IMPLANTABLE COLLAMER LENS (ICL)	Inadequacy of Device Shape and/or Size	Appropriate Clinical Signs, Symptoms, Conditions Term / Code Not Available	P030016	Event Description: THE REPORTER INDICATED THAT THE SURGEON IMPLANTED A 13.2MM VTICM5_13.2; -7/+1.5/108 (SPHERE/CYLINDER/AXIS) IMPLANTABLE COLLAMER LENS INTO THE PATIENT'S RIGHT EYE (OD) ON (B)(6) 2023. THE SURGEON NOTES THE PATIENT HAD EXCESSIVE VAULTING AND SIGNIFICANT REDUCTION OF IRIDO-CORNEAL ANGLES. ON (B)(6) 2023 THE LENS WAS EXCHANGED WITH A SHORTER LENGTH LENS. THE CAUSE OF THE EVENT WAS …	-7/+1.5/108	OD	Physician	09/22/2023	2023	35	Female
https://www.accessdata.fda.gov/scripts/cdrh/cfdocs/cfMAUDE/Detail.CFM?MDRFOI__ID=17966721&pc=QCB	2023826-2023-04640		Malfunction	STAAR SURGICAL COMPANY	2023-10-19 04:00:00	QCB	IMPLANTABLE COLLAMER LENS (ICL)	No Apparent Adverse Event	Appropriate Clinical Signs, Symptoms, Conditions Term / Code Not Available	P030016	Event Description: THE REPORTER INDICATED THAT THE SURGEON IMPLANTED A 12.6MM VTICMO12.6; -12.5/2.0/012 (SPHERE/CYLINDER/AXIS) IMPLANTABLE COLLAMER LENS INTO THE PATIENT'S RIGHT EYE (OD) AS A REPLACEMENT LENS ON (B)(6) 2023. THE SURGEON REPORTS THE PATIENT'S VISION (UCVA) IS NOT MEETING EXPECTATIONS; AND WILL BE MONITORED. LENS REMAINS IMPLANTED. Manufacturer Narrative: H6 - HEALTH EFFECT CLINICA…	-12.5/2.0/012	OD	Physician	09/25/2023	2023		Female
https://www.accessdata.fda.gov/scripts/cdrh/cfdocs/cfMAUDE/Detail.CFM?MDRFOI__ID=17969208&pc=QCB	2023826-2023-04665	2023-08-01 04:00:00	Injury	STAAR SURGICAL COMPANY	2023-10-19 04:00:00	QCB	IMPLANTABLE COLLAMER LENS (ICL)	Off-Label Use; Inadequacy of Device Shape and/or Size	Appropriate Clinical Signs, Symptoms, Conditions Term / Code Not Available	P030016	Event Description: THE REPORTER INDICATED THAT THE SURGEON IMPLANTED A 12.6MM VTICMO 12.6 IMPLANTABLE COLLAMER LENS OF DIOPTER -11.0/1.5/091 (SPHERE/CYLINDER/AXIS) INTO THE PATIENT'S RIGHT EYE (OD) ON (B)(6) 2023. ON (B)(6) 2023 THE LENS WAS EXCHANGED FOR A LONGER LENGTH LENS DUE TO LOW VAULT. THE PROBLEM WAS RESOLVED. THE CAUSE OF THE EVENT WAS REPORTED AS UNKNOWN. Manufacturer Narrative: H6-DEV…	-11.0/1.5/091	OD	Physician	10/18/2023	2023	29	Female
https://www.accessdata.fda.gov/scripts/cdrh/cfdocs/cfMAUDE/Detail.CFM?MDRFOI__ID=18021670&pc=QCB	2023826-2023-04731	2023-09-26 04:00:00	Injury	STAAR SURGICAL COMPANY	2023-10-27 04:00:00	QCB	IMPLANTABLE COLLAMER LENS (ICL)	No Apparent Adverse Event	Appropriate Clinical Signs, Symptoms, Conditions Term / Code Not Available	P030016	Event Description: THE REPORTER INDICATED THAT A 13.2MM VTICM513.2 IMPLANTABLE COLLAMER LENS OF -8.0/2.0/164 (SPHERE/CYLINDER/AXIS) WAS IMPLANTED INTO THE PATIENT'S RIGHT EYE (OD) ON (B)(6) 2023. AN UNREACTIVE (FIXED) PUPIL IS OBSERVED. REPORTEDLY, "THE PATIENT IS MONITORED CLOSELY." Manufacturer Narrative: H6: WORK ORDER SEARCH: NO SIMILAR COMPLAINTS WITHIN ASSOCIATED LOTS WERE FOUND. CLAIM# (B)…	-8.0/2.0/164	OD	Physician	10/17/2023	2023	25	Female
https://www.accessdata.fda.gov/scripts/cdrh/cfdocs/cfMAUDE/Detail.CFM?MDRFOI__ID=18021671&pc=QCB	2023826-2023-04732	2023-09-26 04:00:00	Injury	STAAR SURGICAL COMPANY	2023-10-27 04:00:00	QCB	IMPLANTABLE COLLAMER LENS (ICL)	No Apparent Adverse Event	Appropriate Clinical Signs, Symptoms, Conditions Term / Code Not Available	P030016	Event Description: THE REPORTER INDICATED THAT A 13.2MM VTICM513.2 IMPLANTABLE COLLAMER LENS OF -7.0/1.0/158 (SPHERE/CYLINDER/AXIS) WAS IMPLANTED INTO THE PATIENT'S LEFT EYE (OS) ON (B)(6) 2023. AN UNREACTIVE (FIXED) PUPIL IS OBSERVED. REPORTEDLY, "THE PATIENT IS MONITORED CLOSELY." Manufacturer Narrative: H6: WORK ORDER SEARCH: NO SIMILAR COMPLAINTS WITHIN ASSOCIATED LOTS WERE FOUND. CLAIM# (B)(…	-7.0/1.0/158	OS	Physician	10/17/2023	2023	25	Female
https://www.accessdata.fda.gov/scripts/cdrh/cfdocs/cfMAUDE/Detail.CFM?MDRFOI__ID=18067915&pc=QCB	2023826-2023-04773	2023-09-27 04:00:00	Malfunction	STAAR SURGICAL COMPANY	2023-11-03 04:00:00	QCB	IMPLANTABLE COLLAMER LENS (ICL)	No Apparent Adverse Event	Appropriate Clinical Signs, Symptoms, Conditions Term / Code Not Available	P030016	Event Description: THE REPORTER INDICATED THE SURGEON IMPLANTED A 13.7MM VTICMO13.7 IMPLANTABLE COLLAMER LENS, -12.00/+4.5/077 (SPHERE/CYLINDER/AXIS), IN THE PATIENTS RIGHT EYE (OD), ON (B)(6) 2023. THIS WAS THE REPLACEMENT LENS FOR MFR. REPORT # 2023826-2023-04772, BUT THE PROBLEM WAS NOT RESOLVED. THE PATIENT COMPLAINED OF DOUBLE VISION. AT ONE DAY POST-OP, THE DOUBLE VISION WAS IMPROVING. THE …	-12.00/+4.5/077	OD	Physician	10/12/2023	2023	26	Male
https://www.accessdata.fda.gov/scripts/cdrh/cfdocs/cfMAUDE/Detail.CFM?MDRFOI__ID=18086564&pc=QCB	2023826-2023-04880	2023-09-10 04:00:00	Injury	STAAR SURGICAL COMPANY	2023-11-07 05:00:00	QCB	IMPLANTABLE COLLAMER LENS (ICL)	Inadequacy of Device Shape and/or Size	Appropriate Clinical Signs, Symptoms, Conditions Term / Code Not Available	P030016	Event Description: THE REPORTER INDICATED THAT THE SURGEON IMPLANTED A 13.2MM VTICM5_13.2 IMPLANTABLE COLLAMER LENS OF DIOPTER -15.0/+2.5/093 INTO THE PATIENT'S RIGHT EYE (OD) ON (B)(6) 2023. THE LENS WAS EXCHANGED ON (B)(6) 2023 FOR A SHORTER LENGTH LENS DUE TO EXCESSIVE VAULT AND SIGNIFICANT REDUCTION OF IRIDO-CORNEAL ANGLES. THIS RESOLVED THE PROBLEM. THE REPORTER DID NOT GIVE A CAUSE FOR THIS…	-15.0/+2.5/093	OD	Physician	10/12/2023	2023	48	Female
https://www.accessdata.fda.gov/scripts/cdrh/cfdocs/cfMAUDE/Detail.CFM?MDRFOI__ID=18093426&pc=QCB	2023826-2023-05029	2023-09-21 04:00:00	Injury	STAAR SURGICAL COMPANY	2023-11-08 05:00:00	QCB	IMPLANTABLE COLLAMER LENS (ICL)	No Apparent Adverse Event	Appropriate Clinical Signs, Symptoms, Conditions Term / Code Not Available	P030016	Event Description: THE REPORTER INDICATED THAT THE SURGEON IMPLANTED A 13.2MM VTICM5_13.2; -10.50/3.5/092 (SPHERE/CYLINDER/AXIS) IMPLANTABLE COLLAMER LENS INTO THE PATIENT'S LEFT EYE (OS). THE SURGEON REPORTS THERE WAS AN UNEXPECTED OUTCOME. LENS REMAINS IMPLANTED. IF ADDITIONAL INFORMATION IS RECEIVED A SUPPLEMENTAL MEDWATCH REPORT WILL BE SUBMITTED. Manufacturer Narrative: CLAIM#: (B)(4). Manuf…	-10.50/3.5/092	OS	Physician	10/18/2023	2023	39	Male
https://www.accessdata.fda.gov/scripts/cdrh/cfdocs/cfMAUDE/Detail.CFM?MDRFOI__ID=18107627&pc=QCB	2023826-2023-05015	2023-07-18 04:00:00	Injury	STAAR SURGICAL COMPANY	2023-11-09 05:00:00	QCB	IMPLANTABLE COLLAMER LENS (ICL)	Off-Label Use; Inadequacy of Device Shape and/or Size	Appropriate Clinical Signs, Symptoms, Conditions Term / Code Not Available	P030016	Event Description: THE REPORTER INDICATED THAT THE SURGEON IMPLANTED A 13.7MM VTICMO13.7 IMPLANTABLE COLLAMER LENS OF DIOPTER -11.5/+2.5/011 INTO THE PATIENT'S LEFT EYE (OS) ON (B)(6) 2023. THE LENS WAS EXCHANGED ON (B)(6) 2023 FOR A SHORTER LENGTH LENS DUE TO EXCESSIVE VAULT AND SIGNIFICANT REDUCTION OF IRIDO-CORNEAL ANGLES. THIS RESOLVED THE PROBLEM. CAUSE OF EVENT REPORTED AS UNKNOWN. Manufact…	-11.5/+2.5/011	OS	Physician	10/15/2023	2023	17	Male
https://www.accessdata.fda.gov/scripts/cdrh/cfdocs/cfMAUDE/Detail.CFM?MDRFOI__ID=18107628&pc=QCB	2023826-2023-05014	2023-07-18 04:00:00	Injury	STAAR SURGICAL COMPANY	2023-11-09 05:00:00	QCB	IMPLANTABLE COLLAMER LENS (ICL)	Off-Label Use; Inadequacy of Device Shape and/or Size	Appropriate Clinical Signs, Symptoms, Conditions Term / Code Not Available	P030016	Event Description: THE REPORTER INDICATED THAT THE SURGEON IMPLANTED A 13.7MM VTICMO13.7 IMPLANTABLE COLLAMER LENS OF DIOPTER -11.5/+1.5/177 INTO THE PATIENT'S RIGHT EYE (OD) ON (B)(6) 2023. THE LENS WAS EXCHANGED ON (B)(6) 2023, FOR A SHORTER LENGTH LENS DUE TO EXCESSIVE VAULT AND SIGNIFICANT REDUCTION OF IRIDO-CORNEAL ANGLES. THIS RESOLVED THE PROBLEM. CAUSE OF EVENT REPORTED AS UNKNOWN. Manufa…	-11.5/+1.5/177	OD	Physician	10/15/2023	2023	17	Male
https://www.accessdata.fda.gov/scripts/cdrh/cfdocs/cfMAUDE/Detail.CFM?MDRFOI__ID=18170877&pc=QCB	2023826-2023-05205	2023-10-08 04:00:00	Injury	STAAR SURGICAL COMPANY	2023-11-20 05:00:00	QCB	IMPLANTABLE COLLAMER LENS (ICL)	Inadequacy of Device Shape and/or Size	Appropriate Clinical Signs, Symptoms, Conditions Term / Code Not Available	P030016	Event Description: THE REPORTER INDICATED THAT THE SURGEON IMPLANTED A 13.2MM VTICMO13.2 IMPLANTABLE COLLAMER LENS OF DIOPTER -9.5/+1.0/090 INTO THE PATIENT'S LEFT EYE (OS) ON (B)(6) 2023. THE LENS WAS EXCHANGED ON (B)(6) 2023 FOR A SHORTER LENGTH LENS DUE TO EXCESSIVE VAULT AND SIGNIFICANT REDUCTION OF IRIDO-CORNEAL ANGLES. THIS RESOLVED THE PROBLEM. CAUSE OF EVENT REPORTED AS UNKNOWN. Manufactu…	-9.5/+1.0/090	OS	Physician	10/25/2023	2023	24	Male
https://www.accessdata.fda.gov/scripts/cdrh/cfdocs/cfMAUDE/Detail.CFM?MDRFOI__ID=18179625&pc=QCB	2023826-2023-05188	2023-09-04 04:00:00	Injury	STAAR SURGICAL COMPANY	2023-11-21 05:00:00	QCB	IMPLANTABLE COLLAMER LENS (ICL)	Adverse Event Without Identified Device or Use Problem	Appropriate Clinical Signs, Symptoms, Conditions Term / Code Not Available	P030016	Event Description: THE REPORTER INDICATED THAT A 13.2 MM VTICMO 13.2 IMPLANTABLE COLLAMER LENS OF -11.00/3.5/071 (SPHERE/CYLINDER/AXIS) WAS IMPLANTED INTO THE PATIENTS LEFT EYE (OS) ON (B)(6) 2023. ON (B)(6) 2023 THE LENS WAS EXPLANTED DUE TO PATIENT REQUEST. THE PROBLEM WAS RESOLVED AND CAUSE REPORTED AS PATIENT RELATED FACTOR. Manufacturer Narrative: ADDITIONAL INFORMATION: H6-CLINICAL CODE 458…	-11.00/3.5/071	OS	Physician	10/24/2023	2023	21	Male
https://www.accessdata.fda.gov/scripts/cdrh/cfdocs/cfMAUDE/Detail.CFM?MDRFOI__ID=18179626&pc=QCB	2023826-2023-05187	2023-09-04 04:00:00	Injury	STAAR SURGICAL COMPANY	2023-11-21 05:00:00	QCB	IMPLANTABLE COLLAMER LENS (ICL)	Adverse Event Without Identified Device or Use Problem	Appropriate Clinical Signs, Symptoms, Conditions Term / Code Not Available	P030016	Event Description: THE REPORTER INDICATED THAT A 13.2 MM VTICMO 13.2 IMPLANTABLE COLLAMER LENS OF -11.50/3.5/093 (SPHERE/CYLINDER/AXIS) WAS IMPLANTED INTO THE PATIENTS RIGHT EYE (OD) ON (B)(6) 2023. ON (B)(6) 2023 THE LENS WAS EXPLANTED DUE TO PATIENT REQUEST. THE PROBLEM WAS RESOLVED AND CAUSE REPORTED AS PATIENT RELATED FACTOR. Manufacturer Narrative: ADDITIONAL INFORMATION: H6-CLINICAL CODE 45…	-11.50/3.5/093	OD	Physician	10/24/2023	2023	21	Male
https://www.accessdata.fda.gov/scripts/cdrh/cfdocs/cfMAUDE/Detail.CFM?MDRFOI__ID=18258186&pc=QCB	2023826-2023-05309	2023-08-17 04:00:00	Injury	STAAR SURGICAL COMPANY	2023-12-04 05:00:00	QCB	IMPLANTABLE COLLAMER LENS (ICL)	Adverse Event Without Identified Device or Use Problem	Appropriate Clinical Signs, Symptoms, Conditions Term / Code Not Available	P030016	Event Description: THE REPORTER INDICATED THAT THE SURGEON IMPLANTED A 13.2MM VTICMO13.2, -9.5/1.0/105 (SPHERE/CYLINDER/AXIS), IMPLANTABLE COLLAMER LENS INTO THE PATIENT'S RIGHT EYE (OD) ON (B)(6) 2023. LENS WAS EXPLANTED ON (B)(6) 2023 DUE TO UNREACTIVE (FIXED) PUPIL. THIS HAS NOT RESOLVED THE PROBLEM. REPORTEDLY, PATIENT PUPIL IS 3-4MM AND CONTINUES TO BE UNDER OBSERVATION. Manufacturer Narrati…	-9.5/1.0/105	OD	Physician	11/13/2023	2023	23	Female
https://www.accessdata.fda.gov/scripts/cdrh/cfdocs/cfMAUDE/Detail.CFM?MDRFOI__ID=18340520&pc=QCB	2023826-2023-05679	2023-10-14 04:00:00	Injury	STAAR SURGICAL COMPANY	2023-12-15 05:00:00	QCB	IMPLANTABLE COLLAMER LENS (ICL)	Inadequacy of Device Shape and/or Size	Appropriate Clinical Signs, Symptoms, Conditions Term / Code Not Available	P030016	Event Description: THE REPORTER INDICATED THAT THE SURGEON IMPLANTED A 13.2MM VTICMO13.2; -11.5/1.0/130 (SPHERE/CYLINDER/AXIS) IMPLANTABLE COLLAMER LENS INTO THE PATIENT'S LEFT EYE (OS) ON (B)(6) 2023. THE PATIENT EXPERIENCED EXCESSIVE VAULTING AND SIGNIFICANT REDUCTION OF IRIDO-CORNEAL ANGLES. ON (B)(6) 2023 THE LENS WAS EXCHANGED WITH A SHORTER LENGTH LENS BUT THE PROBLEM WAS NOT RESOLVED; THE …	-11.5/1.0/130	OS	Physician	12/14/2023	2023	24	Female
https://www.accessdata.fda.gov/scripts/cdrh/cfdocs/cfMAUDE/Detail.CFM?MDRFOI__ID=18341179&pc=QCB	2023826-2023-05639	2023-11-06 05:00:00	Injury	STAAR SURGICAL COMPANY	2023-12-15 05:00:00	QCB	IMPLANTABLE COLLAMER LENS (ICL)	Off-Label Use; Inadequacy of Device Shape and/or Size	Appropriate Clinical Signs, Symptoms, Conditions Term / Code Not Available	P030016	Event Description: THE REPORTER INDICATED THAT THE SURGEON IMPLANTED A 13.2MM VTICMO13.2 IMPLANTABLE COLLAMER LENS OF DIOPTER -17.0/+1.0/092 INTO THE PATIENT'S RIGHT EYE (OD) ON (B)(6) 2022. THE LENS WAS EXCHANGED ON (B)(6) 2023 FOR A SHORTER LENGTH LENS DUE TO EXCESSIVE VAULT AND SIGNIFICANT REDUCTION OF IRIDO-CORNEAL ANGLES. THIS RESOLVED THE PROBLEM. CAUSE OF EVENT REPORTED AS UNKNOWN. Manufac…	-17.0/+1.0/092	OD	Physician	11/19/2023	2023	20	Female
https://www.accessdata.fda.gov/scripts/cdrh/cfdocs/cfMAUDE/Detail.CFM?MDRFOI__ID=18341181&pc=QCB	2023826-2023-05638	2023-11-06 05:00:00	Injury	STAAR SURGICAL COMPANY	2023-12-15 05:00:00	QCB	IMPLANTABLE COLLAMER LENS (ICL)	Off-Label Use; Inadequacy of Device Shape and/or Size	Appropriate Clinical Signs, Symptoms, Conditions Term / Code Not Available	P030016	Event Description: THE REPORTER INDICATED THAT THE SURGEON IMPLANTED A 13.2MM VTICMO13.2 IMPLANTABLE COLLAMER LENS OF DIOPTER -14.0/+1.5/109 INTO THE PATIENT'S LEFT EYE (OS) ON (B)(6) 2022. THE LENS WAS EXCHANGED ON (B)(6) 2023 FOR A SHORTER LENGTH LENS DUE TO EXCESSIVE VAULT AND SIGNIFICANT REDUCTION OF IRIDO-CORNEAL ANGLES. THIS RESOLVED THE PROBLEM. CAUSE OF EVENT REPORTED AS UNKNOWN. Manufact…	-14.0/+1.5/109	OS	Physician	11/19/2023	2023	20	Female
https://www.accessdata.fda.gov/scripts/cdrh/cfdocs/cfMAUDE/Detail.CFM?MDRFOI__ID=18346602&pc=QCB	2023826-2023-05631	2023-11-16 05:00:00	Injury	STAAR SURGICAL COMPANY	2023-12-18 05:00:00	QCB	IMPLANTABLE COLLAMER LENS (ICL)	Adverse Event Without Identified Device or Use Problem	Appropriate Clinical Signs, Symptoms, Conditions Term / Code Not Available	P030016	Event Description: THE REPORTER INDICATED THAT A 12.6MM, VTICM5_12.6, -5.50/4.0/100 (SPHERE/CYLINDER/AXIS), IMPLANTABLE COLLAMER LENS WAS IMPLANTED INTO THE PATIENT'S LEFT EYE (OS) ON 17/OCT/2023. SIGNIFICANT REDUCTION OF IRIDOCORNEAL ANGLES WAS OBSERVED. ON (B)(6) 2023, AN ANTERIOR CHAMBER FORMATION WITH BSS AND SUTURING OF THE INCISION WAS PERFORMED AS A PROCEDURE FOR A SIGNIFICANTLY NARROW ANG…	-5.50/4.0/100	OS	Physician	12/01/2023	2023	36	Female
https://www.accessdata.fda.gov/scripts/cdrh/cfdocs/cfMAUDE/Detail.CFM?MDRFOI__ID=18387571&pc=QCB	2023826-2023-05572	2023-11-27 05:00:00	Injury	STAAR SURGICAL COMPANY	2023-12-22 05:00:00	QCB	IMPLANTABLE COLLAMER LENS (ICL)	Inadequacy of Device Shape and/or Size	Appropriate Clinical Signs, Symptoms, Conditions Term / Code Not Available	P030016	Event Description: THE REPORTER INDICATED THE SURGEON IMPLANTED A 12.6MM VTICMO12.6 IMPLANTABLE COLLAMER LENS, -15.50/+5.0/103 (SPHERE/CYLINDER/AXIS), INTO THE PATIENTS LEFT EYE (OS) ON (B)(6) 2023. THE LENS WAS REMOVED ON 05-DEC-2023 DUE TO EXCESSIVE VAULTING, IRIDOCORNEAL TOUCH AND SIGNIFICANT REDUCTION OF IRIDO-CORNEAL ANGLES. THE LENS WAS REPLACED WITH A SHORTER LENS AND THE PROBLEM WAS RESOL…	-15.50/+5.0/103	OS	Physician	12/05/2023	2023	34	Female
https://www.accessdata.fda.gov/scripts/cdrh/cfdocs/cfMAUDE/Detail.CFM?MDRFOI__ID=18387576&pc=QCB	2023826-2023-05727	2023-11-23 05:00:00	Injury	STAAR SURGICAL COMPANY	2023-12-22 05:00:00	QCB	IMPLANTABLE COLLAMER LENS (ICL)	Inadequacy of Device Shape and/or Size	Appropriate Clinical Signs, Symptoms, Conditions Term / Code Not Available	P030016	Event Description: THE REPORTER INDICATED THE SURGEON IMPLANTED A 13.2MM VTICM5_13.2 IMPLANTABLE COLLAMER LENS, -04.00/+1.0/001 (SPHERE/CYLINDER/AXIS) IN THE PATIENTS RIGHT EYE (OD), ON (B)(6) 2023. THE LENS WAS REMOVED ON (B)(6) 2023 DUE TO EXCESSIVE VAULTING AND SIGNIFICANT REDUCTION OF IRIDO-CORNEAL ANGLES. THE LENS WAS REPLACED WITH A SHORTER LENS AND THE PROBLEM WAS RESOLVED. THE EYE IS CALM…	-04.00/+1.0/001	OD	Physician	12/08/2023	2023	31	Male
https://www.accessdata.fda.gov/scripts/cdrh/cfdocs/cfMAUDE/Detail.CFM?MDRFOI__ID=18387584&pc=QCB	2023826-2023-05726		Malfunction	STAAR SURGICAL COMPANY	2023-12-22 05:00:00	QCB	IMPLANTABLE COLLAMER LENS (ICL)	No Apparent Adverse Event	Appropriate Clinical Signs, Symptoms, Conditions Term / Code Not Available	P030016	Event Description: THE REPORTER INDICATED THE SURGEON IMPLANTED A 13.2MM VTICM5_13.2 IMPLANTABLE COLLAMER LENS, -08.00/+3.0/080 (SPHERE/CYLINDER/AXIS), IN THE PATIENTS LEFT EYE (OS), ON (B)(6) 2023. THIS WAS THE REPLACEMENT LENS FOR MFR. REPORT # 2023826-2023-03983 BUT THE PROBLEM WAS NOT RESOLVED. THERE WAS STILL A MYOPIC RESIDUAL AFTER THE EXCHANGE. THE LENS REMAINED IMPLANTED AND THE SURGEON W…	-08.00/+3.0/080	OS	Physician	12/06/2023	2023		Female
https://www.accessdata.fda.gov/scripts/cdrh/cfdocs/cfMAUDE/Detail.CFM?MDRFOI__ID=18387615&pc=QCB	2023826-2023-05571	2023-11-27 05:00:00	Injury	STAAR SURGICAL COMPANY	2023-12-22 05:00:00	QCB	IMPLANTABLE COLLAMER LENS (ICL)	Inadequacy of Device Shape and/or Size	Appropriate Clinical Signs, Symptoms, Conditions Term / Code Not Available	P030016	Event Description: THE REPORTER INDICATED THE SURGEON IMPLANTED A 12.6MM VTICMO12.6 IMPLANTABLE COLLAMER LENS, -14.50/+5.0/089 (SPHERE/CYLINDER/AXIS), INTO THE PATIENTS RIGHT EYE (OD) ON (B)(6) 2023. THE LENS WAS REMOVED ON (B)(6) 2023 DUE TO EXCESSIVE VAULTING, IRIDOCORNEAL TOUCH AND SIGNIFICANT REDUCTION OF IRIDO-CORNEAL ANGLES. THE LENS WAS REPLACED WITH A SHORTER LENS AND THE PROBLEM WAS RESO…	-14.50/+5.0/089	OD	Physician	12/05/2023	2023	34	Female
https://www.accessdata.fda.gov/scripts/cdrh/cfdocs/cfMAUDE/Detail.CFM?MDRFOI__ID=18427342&pc=QCB	2023826-2024-00008	2023-11-11 05:00:00	Injury	STAAR SURGICAL COMPANY	2024-01-02 05:00:00	QCB	IMPLANTABLE COLLAMER LENS (ICL)	Off-Label Use; Inadequacy of Device Shape and/or Size; Patient-Device Incompatibility	Appropriate Clinical Signs, Symptoms, Conditions Term / Code Not Available	P030016	Event Description: THE REPORTER INDICATED THAT THE SURGEON IMPLANTED A 12.6MM VTICM5_12.6, -2.0/4.0/105 (SPHERE/CYLINDER/AXIS), IMPLANTABLE COLLAMER LENS INTO THE PATIENT'S RIGHT EYE (OD) ON (B)(6) 2023. THE LENS WAS REPLACED WITH A SHORTER LENGTH LENS DUE TO ANGLE CLOSURE AND EXCESSIVE VAULT ON (B)(6) 2023. THIS RESOLVED THE PROBLEM. CAUSE OF THE EVENT IS REPORTED AS UNKNOWN, PATIENT RELATED FAC…	-2.0/4.0/105	OD	Physician	12/15/2023	2023	50	Male
https://www.accessdata.fda.gov/scripts/cdrh/cfdocs/cfMAUDE/Detail.CFM?MDRFOI__ID=18428711&pc=QCB	2023826-2024-00060	2023-02-06 05:00:00	Injury	STAAR SURGICAL COMPANY	2024-01-02 05:00:00	QCB	IMPLANTABLE COLLAMER LENS (ICL)	Inadequacy of Device Shape and/or Size	Appropriate Clinical Signs, Symptoms, Conditions Term / Code Not Available	P030016	Event Description: THE REPORTER INDICATED THAT THE SURGEON IMPLANTED A 13.2MM VTICM5_13.2; -13/2.5/112 (SPHERE/CYLINDER/AXIS) IMPLANTABLE COLLAMER LENS INTO THE PATIENT'S RIGHT EYE (OD) ON (B)(6) 2023. THE SURGEON REPORTS THE PATIENT HAS EXCESSIVE VAULTING AND SIGNIFICANT REDUCTION OF IRIDO-CORNEAL ANGLES. ON (B)(6) 2024 THE SURGEON INDICATES HE WILL EXPLANT AND REPLACE THE LENS. THE CAUSE OF THE…	-13/2.5/112	OD	Physician	12/04/2023	2023		Male
https://www.accessdata.fda.gov/scripts/cdrh/cfdocs/cfMAUDE/Detail.CFM?MDRFOI__ID=18467571&pc=QCB	2023826-2024-00150		Malfunction	STAAR SURGICAL COMPANY	2024-01-08 05:00:00	QCB	IMPLANTABLE COLLAMER LENS (ICL)	No Apparent Adverse Event	Appropriate Clinical Signs, Symptoms, Conditions Term / Code Not Available	P030016	Event Description: THE REPORTER INDICATED THAT THE SURGEON IMPLANTED A 12.6MM VTICMO12.6; -11.0/0.5/173 (SPHERE/CYLINDER/AXIS) IMPLANTABLE COLLAMER LENS INTO THE PATIENT'S LEFT EYE ON (B)(6) 2023 AS A REPLACEMENT LENS. THE SURGEON REPORTS THERE WILL BE ANOTHER ICL EXCHANGE TO TAKE PLACE TO GENERATE A NEW ASTIGMATISM AND "COMBINED WITH THE COMPREHENSIVE OPTOMETRY AFTER THE FIRST SURGERY, A NEW OPT…	-11.0/0.5/173	OS	Physician	12/14/2023	2023		Female
https://www.accessdata.fda.gov/scripts/cdrh/cfdocs/cfMAUDE/Detail.CFM?MDRFOI__ID=18548443&pc=QCB	2023826-2024-00294	2023-11-25 05:00:00	Injury	STAAR SURGICAL COMPANY	2024-01-19 05:00:00	QCB	IMPLANTABLE COLLAMER LENS (ICL)	Inadequacy of Device Shape and/or Size	Appropriate Clinical Signs, Symptoms, Conditions Term / Code Not Available	P030016	Event Description: THE REPORTER INDICATED THAT THE SURGEON IMPLANTED A 13.2MM VTICMO13.2 IMPLANTABLE COLLAMER LENS OF DIOPTER -8.5/+3.5/094 INTO THE PATIENT'S LEFT EYE (OS) ON (B)(6) 2023. EXCESSIVE VAULTING AND SIGNIFICANT REDUCTION OF IRIDO-CORNEAL ANGLES WERE NOTED. THE LENS WAS EXCHANGED ON (B)(6) 2023 FOR A SHORTER LENGTH LENS AND THIS RESOLVED THE PROBLEM. CAUSE OF EVENT REPORTED AS UNKNOWN…	-8.5/+3.5/094	OS	Physician	12/25/2023	2023	26	Male
https://www.accessdata.fda.gov/scripts/cdrh/cfdocs/cfMAUDE/Detail.CFM?MDRFOI__ID=18548445&pc=QCB	2023826-2024-00295	2023-11-25 05:00:00	Injury	STAAR SURGICAL COMPANY	2024-01-19 05:00:00	QCB	IMPLANTABLE COLLAMER LENS (ICL)	Inadequacy of Device Shape and/or Size	Appropriate Clinical Signs, Symptoms, Conditions Term / Code Not Available	P030016	Event Description: THE REPORTER INDICATED THAT THE SURGEON IMPLANTED A 13.2MM VTICMO13.2 IMPLANTABLE COLLAMER LENS OF DIOPTER -7.0/+2.0/095 INTO THE PATIENT'S RIGHT EYE (OD) ON (B)(6) 2023. EXCESSIVE VAULTING AND SIGNIFICANT REDUCTION OF IRIDO-CORNEAL ANGLES WERE NOTED. THE LENS WAS EXCHANGED ON (B)(6) 2023 FOR A SHORTER LENGTH LENS AND THIS RESOLVED THE PROBLEM. CAUSE OF EVENT REPORTED AS UNKNOW…	-7.0/+2.0/095	OD	Physician	12/25/2023	2023	26	Male
https://www.accessdata.fda.gov/scripts/cdrh/cfdocs/cfMAUDE/Detail.CFM?MDRFOI__ID=18565310&pc=QCB	2023826-2024-00332	2023-01-11 05:00:00	Injury	STAAR SURGICAL COMPANY	2024-01-23 05:00:00	QCB	IMPLANTABLE COLLAMER LENS (ICL)	Inadequacy of Device Shape and/or Size	Appropriate Clinical Signs, Symptoms, Conditions Term / Code Not Available	P030016	Event Description: THE REPORTER INDICATED THAT THE SURGEON IMPLANTED A 12.6MM VTICMO12.6 IMPLANTABLE COLLAMER LENS OF DIOPTER -6.5/+4.0/005 INTO THE PATIENT'S RIGHT EYE (OD) ON (B)(6) 2023. EXCESSIVE VAULT AND SIGNIFICANT REDUCTION OF IRIDO-CORNEAL ANGLES WERE NOTED. THE LENS WAS REMOVED ON (B)(6) 2023 AND IN A SEPARATE SURGERY THAT DAY A SHORTER LENGTH LENS WAS IMPLANTED. THE PROBLEM WAS RESOLVE…	-6.5/+4.0/005	OD	Physician	12/28/2023	2023	21	Male
https://www.accessdata.fda.gov/scripts/cdrh/cfdocs/cfMAUDE/Detail.CFM?MDRFOI__ID=18565318&pc=QCB	2023826-2024-00326	2023-01-12 05:00:00	Injury	STAAR SURGICAL COMPANY	2024-01-23 05:00:00	QCB	IMPLANTABLE COLLAMER LENS (ICL)	Inadequacy of Device Shape and/or Size	Appropriate Clinical Signs, Symptoms, Conditions Term / Code Not Available	P030016	Event Description: THE REPORTER INDICATED THAT THE SURGEON IMPLANTED A 13.2MM VTICM5_13.2 IMPLANTABLE COLLAMER LENS OF DIOPTER -5.5/+5.5/111 INTO THE PATIENT'S RIGHT EYE (OD) ON (B)(6) 2023. THE LENS WAS EXPLANTED ON (B)(6) 2023 DUE TO EXCESSIVE VAULT AND SIGNIFICANT REDUCTION OF IRIDO-CORNEAL ANGLES. THAT SAME DAY A LENS TWO SIZES SHORTER IN LENGTH WAS IMPLANTED HOWEVER IT IS UNCLEAR IF THIS WAS…	-5.5/+5.5/111	OD	Physician	12/28/2023	2023	23	Male
https://www.accessdata.fda.gov/scripts/cdrh/cfdocs/cfMAUDE/Detail.CFM?MDRFOI__ID=10515401&pc=QCB	2023826-2020-02028	2020-08-12 04:00:00	Malfunction	STAAR SURGICAL COMPANY	2020-09-10 04:00:00	QCB	IMPLANTABLE COLLAMER LENS (ICL)	Improper or Incorrect Procedure or Method; Unintended Movement	Appropriate Clinical Signs, Symptoms, Conditions Term / Code Not Available; No Clinical Signs, Symptoms or Conditions	N/A	Event Description: THE REPORTER INDICATED THAT THE SURGEON IMPLANTED A 13.2MM VTICM5_13.2 IMPLANTABLE COLLAMER LENS, -9.00/2.5/017 (SPHERE/CYLINDER/AXIS), INTO THE PATIENT'S RIGHT EYE (OD) ON (B)(6) 2020. AFTER INSERTION, THE LENS "FLIPPED IN THE EYE. THE LENS WAS REMOVED AND RE-INSERTED 4 TIMES INTRAOPERATIVELY, EACH TIME FLIPPING INSIDE THE EYE. LENS WAS REMOVED. THERE WAS PATIENT CONTACT (LENS…	-9.00/2.5/017	OD		08/19/2020	2020	23
https://www.accessdata.fda.gov/scripts/cdrh/cfdocs/cfMAUDE/Detail.CFM?MDRFOI__ID=10539565&pc=QCB	2023826-2020-02150	2020-08-17 04:00:00	Injury	STAAR SURGICAL COMPANY	2020-09-16 04:00:00	QCB	IMPLANTABLE COLLAMER LENS (ICL)	Inadequacy of Device Shape and/or Size	Appropriate Clinical Signs, Symptoms, Conditions Term / Code Not Available; No Clinical Signs, Symptoms or Conditions	NA	Event Description: THE REPORTER INDICATED THAT A 13.2MM, VTICM5_13.2, -4.00/2.0/095 (SPHERE/CYLINDER/AXIS), IMPLANTABLE COLLAMER LENS WAS IMPLANTED INTO THE PATIENTS LEFT EYE (OS) ON (B)(6) 2020. EXCESSIVE VAULT AND SIGNIFICANT REDUCTION OF IRIDO-CORNEAL ANGLES WAS OBSERVED. LENS REMAINS IMPLANTED, THE REPORTER STATED " THE PATIENT IS STILL UNDER OBSERVATION." IF ADDITIONAL INFORMATION IS RECEIVE…	-4.00/2.0/095	OS		08/17/2020	2020	42
https://www.accessdata.fda.gov/scripts/cdrh/cfdocs/cfMAUDE/Detail.CFM?MDRFOI__ID=10548187&pc=QCB	2023826-2020-02106	2019-07-26 04:00:00	Injury	STAAR SURGICAL COMPANY	2020-09-17 04:00:00	QCB	IMPLANTABLE COLLAMER LENS (ICL)	Inadequacy of Device Shape and/or Size	Appropriate Clinical Signs, Symptoms, Conditions Term / Code Not Available; No Clinical Signs, Symptoms or Conditions	N/A#S-P#N/A	Event Description: THE REPORTER INDICATED THAT THE SURGEON IMPLANTED A 13.2MM VTICMO13.2, -16.00/1.5/085 (SPHERE/CYLINDER/AXIS), IMPLANTABLE COLLAMER LENS INTO THE PATIENT'S RIGHT EYE (OD) ON (B)(6) 2019. THE LENS WAS REMOVED AND REPLACED ON (B)(6) 2019 FOR A SHORTER LENGTH LENS DUE TO EXCESSIVE VAULT. THIS RESOLVED THE PROBLEM. CAUSE OF THE EVENT IS REPORTED AS UNKNOWN. REPORTEDLY, "THE PATIENT …	-16.00/1.5/085	OD		08/25/2020	2020	38
https://www.accessdata.fda.gov/scripts/cdrh/cfdocs/cfMAUDE/Detail.CFM?MDRFOI__ID=10678716&pc=QCB	2023826-2020-02360	2020-06-24 04:00:00	Injury	STAAR SURGICAL COMPANY	2020-10-14 04:00:00	QCB	IMPLANTABLE COLLAMER LENS (ICL)	Inadequacy of Device Shape and/or Size	Appropriate Clinical Signs, Symptoms, Conditions Term / Code Not Available; No Clinical Signs, Symptoms or Conditions	N/A	Event Description: THE REPORTER INDICATED THAT THE SURGEON IMPLANTED A 13.2MM VTICMO13.2, -8.50/1.5/088 (SPHERE/CYLINDER/AXIS), IMPLANTABLE COLLAMER LENS INTO THE PATIENT'S RIGHT EYE (OD) ON (B)(6) 2020. THE LENS WAS REMOVED AND REPLACED ON (B)(6) 2020 FOR A SHORTER LENGTH LENS DUE TO EXCESSIVE VAULT. THIS RESOLVED THE PROBLEM. CAUSE OF THE EVENT IS REPORTED AS UNKNOWN. Manufacturer Narrative: H3…	-8.50/1.5/088	OD		09/25/2020	2020	31
https://www.accessdata.fda.gov/scripts/cdrh/cfdocs/cfMAUDE/Detail.CFM?MDRFOI__ID=10678726&pc=QCB	2023826-2020-02364	2020-05-31 04:00:00	Injury	STAAR SURGICAL COMPANY	2020-10-14 04:00:00	QCB	IMPLANTABLE COLLAMER LENS (ICL)	Inadequacy of Device Shape and/or Size	Appropriate Clinical Signs, Symptoms, Conditions Term / Code Not Available; No Clinical Signs, Symptoms or Conditions	N/A	Event Description: THE REPORTER INDICATED THAT THE SURGEON IMPLANTED A 13.2MM VTICMO13.2, -17.50/1.0/093 (SPHERE/CYLINDER/AXIS), IMPLANTABLE COLLAMER LENS INTO THE PATIENT'S RIGHT EYE (OD) ON (B)(6) 2020. THE LENS WAS REMOVED AND REPLACED ON (B)(6) 2020 FOR A SHORTER LENGTH LENS DUE TO EXCESSIVE VAULT. THIS RESOLVED THE PROBLEM. CAUSE OF THE EVENT IS REPORTED AS UNKNOWN. Manufacturer Narrative: H…	-17.50/1.0/093	OD		09/25/2020	2020	32
https://www.accessdata.fda.gov/scripts/cdrh/cfdocs/cfMAUDE/Detail.CFM?MDRFOI__ID=11014613&pc=QCB	2023826-2020-03004	2020-11-20 05:00:00	Injury	STAAR SURGICAL COMPANY	2020-12-15 05:00:00	QCB	IMPLANTABLE COLLAMER LENS (ICL)	Misfocusing; Off-Label Use; Inadequacy of Device Shape and/or Size; Device Dislodged or Dislocated	Appropriate Clinical Signs, Symptoms, Conditions Term / Code Not Available; No Clinical Signs, Symptoms or Conditions	NA#S-P#NA	Event Description: THE REPORTER INDICATED THE SURGEON IMPLANTED A 12.6MM VTICMO12.6 IMPLANTABLE COLLAMER LENS, -15.00/+3.0/137 (SPHERE/CYLINDER/AXIS), IN THE PATIENTS RIGHT EYE (OD), ON (B)(6) 2020. THE LENS WAS EXPLANTED ON (B)(6) 2020 DUE TO THE LENS ROTATED AND PATIENT EXPERIENCED A REFRACTIVE SURPRISE. ANOTHER ICL LENS WAS NOT IMPLANTED. THE CAUSE OF THE EVENT WAS UNKNOWN. Manufacturer Narrat…	-15.00/+3.0/137	OD		11/23/2020	2020	25
https://www.accessdata.fda.gov/scripts/cdrh/cfdocs/cfMAUDE/Detail.CFM?MDRFOI__ID=11014931&pc=QCB	2023826-2020-03005	2020-11-20 05:00:00	Injury	STAAR SURGICAL COMPANY	2020-12-15 05:00:00	QCB	IMPLANTABLE COLLAMER LENS (ICL)	Inadequacy of Device Shape and/or Size; Device Dislodged or Dislocated	Appropriate Clinical Signs, Symptoms, Conditions Term / Code Not Available; No Clinical Signs, Symptoms or Conditions	NA#S-P#NA	Event Description: THE REPORTER INDICATED THE SURGEON IMPLANTED A 12.6MM VTICMO12.6 IMPLANTABLE COLLAMER LENS, -15.00/+2.5/074 (SPHERE/CYLINDER/AXIS), IN THE PATIENTS LEFT EYE (OS). THE LENS WAS EXPLANTED ON (B)(6) 2020 DUE TO THE LENS ROTATED. ANOTHER ICL LENS WAS NOT IMPLANTED. Manufacturer Narrative: ADDITIONAL DATA: B5: THE LENS WAS IMPLANTED ON (B)(6) 2020. THE LENS WAS EXPLANTED DUE TO EXCE…	-15.00/+2.5/074	OS		11/23/2020	2020	25
https://www.accessdata.fda.gov/scripts/cdrh/cfdocs/cfMAUDE/Detail.CFM?MDRFOI__ID=11129531&pc=QCB	2023826-2021-00079		Injury	STAAR SURGICAL COMPANY	2021-01-07 05:00:00	QCB	IMPLANTABLE COLLAMER LENS (ICL)	Inadequacy of Device Shape and/or Size; Device Dislodged or Dislocated	Appropriate Clinical Signs, Symptoms, Conditions Term / Code Not Available; No Clinical Signs, Symptoms or Conditions	NA	Event Description: THE REPORTER INDICATED THAT A 13.2MM, VTICM5_13.2, -10.5/2.5/085 (SPHERE/CYLINDER/AXIS), IMPLANTABLE COLLAMER LENS WAS IMPLANTED INTO THE PATIENTS RIGHT EYE (OD) ON (B)(6) 2020. ON (B)(6) 2020 THE LENS WAS EXPLANTED THE REPORTER STATED " THERE WAS LOW VAULT, THE LENS WAS DECENTERED." IN THE REPORTERS OPINION THE CAUSE OF THIS EVENT WAS " WEAK ZONULES." IT WAS REPORTED THAT THE …	-10.5/2.5/085	OD	Physician	12/10/2020	2020		Male
https://www.accessdata.fda.gov/scripts/cdrh/cfdocs/cfMAUDE/Detail.CFM?MDRFOI__ID=11322454&pc=QCB	2023826-2021-00418	2020-12-01 05:00:00	Injury	STAAR SURGICAL COMPANY	2021-02-12 05:00:00	QCB	IMPLANTABLE COLLAMER LENS (ICL)	Inadequacy of Device Shape and/or Size	Appropriate Clinical Signs, Symptoms, Conditions Term / Code Not Available; No Clinical Signs, Symptoms or Conditions	NA	Event Description: THE REPORTER INDICATED THAT A 12.6MM, VTICM5_12.6, -9.50/1.00/108 (SPHERE/CYLINDER/AXIS), IMPLANTABLE COLLAMER LENS WAS IMPLANTED INTO THE PATIENTS LEFT EYE (OS) ON (B)(6) 2020. ON (B)(6) 2020 THE LENS WAS EXCHANGED FOR A LONGER LENGTH LENS DUE TO LOW VAULT WITH ROTATION AND PERMANENT LOSS OF BCVA. THIS EXCHANGE RESOLVED THE PROBLEM. CAUSE OF THE EVENT WAS REPORTER AS " OTHER, …	-9.50/1.00/108	OS		01/13/2021	2021	31
https://www.accessdata.fda.gov/scripts/cdrh/cfdocs/cfMAUDE/Detail.CFM?MDRFOI__ID=11400369&pc=QCB	2023826-2021-00529	2021-02-10 05:00:00	Injury	STAAR SURGICAL COMPANY	2021-03-02 05:00:00	QCB	IMPLANTABLE COLLAMER LENS (ICL)	Off-Label Use; Inadequacy of Device Shape and/or Size	Appropriate Clinical Signs, Symptoms, Conditions Term / Code Not Available; No Clinical Signs, Symptoms or Conditions	NA	Event Description: THE REPORTER INDICATED THAT THE SURGEON IMPLANTED AN IMPLANTABLE COLLAMER LENS INTO THE PATIENT'S RIGHT (OD) EYE. THE SURGEON STATES THERE IS A HIGH VAULT. REPORTEDLY, THE LENS REMAINS IMPLANTED. ATTEMPTS TO OBTAIN ADDITIONAL INFORMATION HAVE NOT BEEN SUCCESSFUL.Event Description: THE REPORTER INDICATED THAT THE SURGEON IMPLANTED A 13.2MM VTICM5_13.2 IMPLANTABLE COLLAMER LENS, …	-10.5/+1.5/084	OD		02/09/2021	2021	30
https://www.accessdata.fda.gov/scripts/cdrh/cfdocs/cfMAUDE/Detail.CFM?MDRFOI__ID=11448819&pc=QCB	2023826-2021-00605	2021-02-04 05:00:00	Malfunction	STAAR SURGICAL COMPANY	2021-03-09 05:00:00	QCB	IMPLANTABLE COLLAMER LENS	Inadequacy of Device Shape and/or Size	Appropriate Clinical Signs, Symptoms, Conditions Term / Code Not Available; No Clinical Signs, Symptoms or Conditions	N/A	Event Description: THE REPORTER INDICATED THAT A 13.2MM TMICL13.2 IMPLANTABLE COLLAMER LENS, -6.0/+1.5/073 (SPHERE/CYLINDER/AXIS) WAS IMPLANTED INTO THE PATIENT'S EYE. REPORTEDLY, IT WILL POSSIBLY BE EXCHANGED DUE TO THE LENS BEING TOO VAULTED. ATTEMPTS TO OBTAIN ADDITIONAL INFORMATION HAVE NOT BEEN SUCCESSFUL. Manufacturer Narrative: ADDITIONAL INFORMATION: H3- DEVICE EVALUATION: LENS WAS RETURN…	-6.0/+1.5/073	OS		02/10/2021	2021	36
https://www.accessdata.fda.gov/scripts/cdrh/cfdocs/cfMAUDE/Detail.CFM?MDRFOI__ID=11788209&pc=QCB	2023826-2021-01360	2020-11-23	Injury	STAAR SURGICAL COMPANY	2021-05-06	QCB	IMPLANTABLE COLLAMER LENS (ICL)	Inadequacy of Device Shape and/or Size	Appropriate Clinical Signs, Symptoms, Conditions Term / Code Not Available; No Clinical Signs, Symptoms or Conditions	NA	Event Description: THE REPORTER INDICATED THAT THE SURGEON IMPLANTED A 12.6MM VTICMO12.6 IMPLANTABLE COLLAMER LENS, -12.0/+1.0/073 (SPHERE/CYLINDER/AXIS), INTO THE PATIENT'S LEFT EYE (OS) ON (B)(6) 2020. ON (B)(6) 2021 THE LENS WAS EXCHANGED WITH A SHORTER LENGTH LENS DUE TO EXCESSIVE VAULT AND SIGNIFICANT REDUCTION OF IRIDO-CORNEAL ANGLES (ICA). THE PROBLEM WAS RESOLVED. THE CAUSE OF THE EVENT I…	-12.0/+1.0/073	OS	Physician	04/13/2021	2021	21
https://www.accessdata.fda.gov/scripts/cdrh/cfdocs/cfMAUDE/Detail.CFM?MDRFOI__ID=12132577&pc=QCB	2023826-2021-02385	2021-06-08 04:00:00	Injury	STAAR SURGICAL COMPANY	2021-07-07 04:00:00	QCB	IMPLANTABLE COLLAMER LENS (ICL)	Inadequacy of Device Shape and/or Size	Appropriate Clinical Signs, Symptoms, Conditions Term / Code Not Available; No Clinical Signs, Symptoms or Conditions	P030016	Event Description: THE REPORTER INDICATED THE SURGEON IMPLANTED A 13.2MM TMICL13.2 IMPLANTABLE COLLAMER LENS, -07.50/+1.0/071 (SPHERE/CYLINDER/AXIS), IN THE PATIENTS RIGHT EYE (OD) ON (B)(6) 2021. THE REPORTER INDICATED THE SURGEON PLANS TO EXPLANT AND EXCHANGE THE LENS FOR A SHORTER LENS. THE LENS REMAINED IMPLANTED. ADDITIONAL INFORMATION HAS BEEN REQUESTED BUT NONE HAS BEEN FORTHCOMING. Manufa…	-07.50/+1.0/071	OD		06/10/2021	2021	38
https://www.accessdata.fda.gov/scripts/cdrh/cfdocs/cfMAUDE/Detail.CFM?MDRFOI__ID=12558411&pc=QCB	2023826-2021-03827	2021-08-11	Injury	STAAR SURGICAL COMPANY	2021-09-30	QCB	IMPLANTABLE COLLAMER LENS (ICL)	Inadequacy of Device Shape and/or Size	Appropriate Clinical Signs, Symptoms, Conditions Term / Code Not Available; No Clinical Signs, Symptoms or Conditions		Event Description: THE REPORTER INDICATED THAT THE SURGEON IMPLANTED A 12.6MM VTICMO12.6; -6.5/1.0/70 (SPHERE/CYLINDER/AXIS) IMPLANTABLE COLLAMER LENS INTO THE PATIENT'S LEFT EYE (OS) ON (B)(6) 2021. ON (B)(6) 2021 THE LENS WAS EXCHANGED WITH A SHORTER LENGTH LENS DUE TO EXCESSIVE VAULTING AND SIGNIFICANT REDUCTION OF IRIDO-CORNEAL ANGLES. THIS RESOLVED THE PROBLEM. THE CAUSE OF THE EVENT WAS REP…	-6.5/1.0/70	OS	Physician	09/13/2021	2021	35
https://www.accessdata.fda.gov/scripts/cdrh/cfdocs/cfMAUDE/Detail.CFM?MDRFOI__ID=12599777&pc=QCB	2023826-2021-03906	2021-09-09 04:00:00	Injury	STAAR SURGICAL COMPANY	2021-10-08 04:00:00	QCB	IMPLANTABLE COLLAMER LENS	Inadequacy of Device Shape and/or Size; Adverse Event Without Identified Device or Use Problem	Appropriate Clinical Signs, Symptoms, Conditions Term / Code Not Available; No Clinical Signs, Symptoms or Conditions	P030016	Event Description: THE REPORTER STATES A 13.2MM TMICL13.2 IMPLANTABLE COLLAMER LENS -10.5/+2.0/087 (SPHERE/ CYLINDER/AXIS) WAS IMPLANTED INTO THE PATIENT'S RIGHT (OD) EYE ON (B)(6) 2021. REPORTEDLY, THE LENS WAS EXPLANTED. ATTEMPTS TO OBTAIN ADDITIONAL INFORMATION HAVE NOT BEEN SUCCESSFUL. Manufacturer Narrative: B5-ADDITIONAL INFORMATION: ON (B)(6) 2021 THE LENS WAS EXPLANTED DUE TO EXCESSIVE VA…	-10.5/+2.0/087	OD	Physician	09/15/2021	2021	30	Female
https://www.accessdata.fda.gov/scripts/cdrh/cfdocs/cfMAUDE/Detail.CFM?MDRFOI__ID=12662187&pc=QCB	2023826-2021-04056	2021-06-26	Injury	STAAR SURGICAL COMPANY	2021-10-19	QCB	IMPLANTABLE COLLAMER LENS (ICL)	Off-Label Use; Inadequacy of Device Shape and/or Size	Appropriate Clinical Signs, Symptoms, Conditions Term / Code Not Available; No Clinical Signs, Symptoms or Conditions		Event Description: THE REPORTER INDICATED THAT THE SURGEON IMPLANTED A 13.2MM VTICMO13.2; -9.5/1.5/91 (SPHERE/CYLINDER/AXIS) IMPLANTABLE COLLAMER LENS INTO THE PATIENT'S RIGHT EYE (OD) ON (B)(6) 2021. ON (B)(6) 2021 THE LENS WAS EXCHANGED WITH A SHORTER LENGTH LENS DUE TO EXCESSIVE VAULTING AND SIGNIFICANT REDUCTION OF IRIDO-CORNEAL ANGLES. THIS RESOLVED THE PROBLEM. THE CAUSE OF THE EVENT WAS RE…	-9.5/1.5/91	OD	Physician	10/15/2021	2021	18
https://www.accessdata.fda.gov/scripts/cdrh/cfdocs/cfMAUDE/Detail.CFM?MDRFOI__ID=12666241&pc=QCB	2023826-2021-04057	2021-06-26	Injury	STAAR SURGICAL COMPANY	2021-10-20	QCB	IMPLANTABLE COLLAMER LENS (ICL)	Off-Label Use; Inadequacy of Device Shape and/or Size	Appropriate Clinical Signs, Symptoms, Conditions Term / Code Not Available; No Clinical Signs, Symptoms or Conditions		Event Description: THE REPORTER INDICATED THAT THE SURGEON IMPLANTED A 13.2MM VTICMO13.2; -10.0/2.0/90 (SPHERE/CYLINDER/AXIS) IMPLANTABLE COLLAMER LENS INTO THE PATIENT'S LEFT EYE (OS) ON (B)(6) 2021. ON (B)(6) 2021 THE LENS WAS EXCHANGED WITH A SHORTER LENGTH LENS DUE TO EXCESSIVE VAULTING AND SIGNIFICANT REDUCTION OF IRIDO-CORNEAL ANGLES. THIS RESOLVED THE PROBLEM. THE CAUSE OF THE EVENT WAS RE…	-10.0/2.0/90	OS	Physician	10/15/2021	2021	18
https://www.accessdata.fda.gov/scripts/cdrh/cfdocs/cfMAUDE/Detail.CFM?MDRFOI__ID=12708033&pc=QCB	2023826-2021-04148	2021-10-18 04:00:00	Injury	STAAR SURGICAL COMPANY	2021-10-27 04:00:00	QCB	IMPLANTABLE COLLAMER LENS (ICL)	Inadequacy of Device Shape and/or Size; Adverse Event Without Identified Device or Use Problem	Appropriate Clinical Signs, Symptoms, Conditions Term / Code Not Available; No Clinical Signs, Symptoms or Conditions		Event Description: THE REPORTER INDICATED THAT THE SURGEON IMPLANTED A 12.6MM VTICMO12.6; -4.5/0.5/050 (SPHERE/CYLINDER/AXIS) IMPLANTABLE COLLAMER LENS INTO THE PATIENT'S RIGHT EYE (OD) ON (B)(6) 2021. ON (B)(6) 2021 THE LENS WAS EXCHANGED WITH A LONGER LENGTH LENS DUE TO LOW VAULTING. THIS RESOLVED THE PROBLEM. THE CAUSE OF THE EVENT WAS REPORTED AS UNKNOWN. Manufacturer Narrative: ADDITIONAL DA…	-4.5/0.5/050	OD	Physician	10/25/2021	2021	37	Female
https://www.accessdata.fda.gov/scripts/cdrh/cfdocs/cfMAUDE/Detail.CFM?MDRFOI__ID=12741581&pc=QCB	2023826-2021-04222	2021-07-01	Injury	STAAR SURGICAL COMPANY	2021-11-02	QCB	IMPLANTABLE COLLAMER LENS (ICL)	Inadequacy of Device Shape and/or Size	Appropriate Clinical Signs, Symptoms, Conditions Term / Code Not Available; No Clinical Signs, Symptoms or Conditions		Event Description: THE REPORTER INDICATED THAT THE SURGEON IMPLANTED A 12.6MM VTICM5_12.6; -8.00/+1.50/85 (SPHERE/CYLINDER/AXIS) IMPLANTABLE COLLAMER LENS INTO THE PATIENT'S RIGHT EYE (OD) ON (B)(6) 2021. ON (B)(6) 2021 THE LENS WAS EXCHANGED WITH A LONGER LENGTH LENS DUE TO LOW VAULTING. THIS RESOLVED THE PROBLEM. IT WAS ALSO NOTED THAT "THE RESIDUAL ASTIGMATISM WAS RESOLVED BY BIOPICS". THE CAU…	-8.00/+1.50/85	OD	Physician	10/28/2021	2021	38
https://www.accessdata.fda.gov/scripts/cdrh/cfdocs/cfMAUDE/Detail.CFM?MDRFOI__ID=12741584&pc=QCB	2023826-2021-04223	2021-07-01	Injury	STAAR SURGICAL COMPANY	2021-11-02	QCB	IMPLANTABLE COLLAMER LENS (ICL)	Inadequacy of Device Shape and/or Size	Appropriate Clinical Signs, Symptoms, Conditions Term / Code Not Available; No Clinical Signs, Symptoms or Conditions		Event Description: THE REPORTER INDICATED THAT THE SURGEON IMPLANTED A 12.6MM VTICM5_12.6; -7.00/+1.00/88 (SPHERE/CYLINDER/AXIS) IMPLANTABLE COLLAMER LENS INTO THE PATIENT'S LEFT EYE (OS) ON (B)(6) 2021. ON (B)(6) 2021 THE LENS WAS EXCHANGED WITH A LONGER LENGTH LENS DUE TO LOW VAULTING. THIS RESOLVED THE PROBLEM. IT WAS ALSO NOTED THAT "THE RESIDUAL ASTIGMATISM WAS RESOLVED BY BIOPICS". THE CAUS…	-7.00/+1.00/88	OS	Physician	10/28/2021	2021	38
https://www.accessdata.fda.gov/scripts/cdrh/cfdocs/cfMAUDE/Detail.CFM?MDRFOI__ID=12814434&pc=QCB	2023826-2021-04312	2021-10-24 04:00:00	Injury	STAAR SURGICAL COMPANY	2021-11-15 05:00:00	QCB	IMPLANTABLE COLLAMER LENS (ICL)	Inadequacy of Device Shape and/or Size	Appropriate Clinical Signs, Symptoms, Conditions Term / Code Not Available; No Clinical Signs, Symptoms or Conditions	N/A	Event Description: THE REPORTER INDICATED THAT A 13.2MM VTICMO13.2, -11.00/2.5/088 (SPHERE/CYLINDER/AXIS), IMPLANTABLE COLLAMER LENS WAS IMPLANTED AND REPLACED INTRAOPERATIVELY WITH A SHORTER LENGTH LENS ON (B)(6) 2021 FROM PATIENT'S LEFT EYE (OS) DUE TO EXCESSIVE VAULT. THIS RESOLVED THE PROBLEM. CAUSE OF THE EVENT IS REPORTED AS UNKNOWN. Manufacturer Narrative: B5 - REPORTED 088 AXIS - CORRECT …	-11.00/2.5/088	OS	Physician	10/28/2021	2021	24	Male
https://www.accessdata.fda.gov/scripts/cdrh/cfdocs/cfMAUDE/Detail.CFM?MDRFOI__ID=12888619&pc=QCB	2023826-2021-04565		Injury	STAAR SURGICAL COMPANY	2021-11-29 05:00:00	QCB	IMPLANTABLE COLLAMER LENS (ICL)	Inadequacy of Device Shape and/or Size	Appropriate Clinical Signs, Symptoms, Conditions Term / Code Not Available; No Clinical Signs, Symptoms or Conditions		Event Description: THE REPORTER INDICATED THAT THE SURGEON IMPLANTED A 12.6MM VTICM5_12.6; -12.5/1.00/139 (SPHERE/CYLINDER/AXIS) IMPLANTABLE COLLAMER LENS INTO THE PATIENT'S RIGHT EYE (OD) ON (B)(6) 2021. ON (B)(6) 2021 THE LENS WAS EXPLANTED DUE TO EXCESSIVE VAULTING; SIGNIFICANT REDUCTION OF IRIDO-CORNEAL ANGLES AND IRIDO-CORNEAL TOUCH. A REPLACEMENT LENS OF THE SAME MODEL BUT SHORTER LENGTH WA…	-12.5/1.00/139	OD	Physician	11/18/2021	2021		Female
https://www.accessdata.fda.gov/scripts/cdrh/cfdocs/cfMAUDE/Detail.CFM?MDRFOI__ID=12888654&pc=QCB	2023826-2021-04566		Injury	STAAR SURGICAL COMPANY	2021-11-29 05:00:00	QCB	IMPLANTABLE COLLAMER LENS (ICL)	Inadequacy of Device Shape and/or Size	Appropriate Clinical Signs, Symptoms, Conditions Term / Code Not Available; No Clinical Signs, Symptoms or Conditions		Event Description: THE REPORTER INDICATED THAT THE SURGEON IMPLANTED A 12.6MM VTICMO_12.6; -12.5/1.00/19 (SPHERE/CYLINDER/AXIS) IMPLANTABLE COLLAMER LENS INTO THE PATIENT'S LEFT EYE (OS) ON (B)(6) 2021. ON (B)(6) 2021 THE LENS WAS EXPLANTED DUE TO EXCESSIVE VAULTING; SIGNIFICANT REDUCTION OF IRIDO-CORNEAL ANGLES AND IRIDO-CORNEAL TOUCH. A REPLACEMENT LENS OF THE SAME MODEL BUT SHORTER LENGTH WAS …	-12.5/1.00/19	OS	Physician	11/18/2021	2021		Female
https://www.accessdata.fda.gov/scripts/cdrh/cfdocs/cfMAUDE/Detail.CFM?MDRFOI__ID=13082439&pc=QCB	2023826-2021-04975	2021-12-02 05:00:00	Malfunction	STAAR SURGICAL COMPANY	2021-12-23 05:00:00	QCB	IMPLANTABLE COLLAMER LENS (ICL)	Inadequacy of Device Shape and/or Size	Appropriate Clinical Signs, Symptoms, Conditions Term / Code Not Available; No Clinical Signs, Symptoms or Conditions	NA	Event Description: THE REPORTER INDICATED THAT THE SURGEON IMPLANTED AN IMPLANTABLE COLLAMER LENS INTO THE PATIENT'S RIGHT (OD) EYE. THE SURGEON STATES THERE IS A HIGH VAULT. REPORTEDLY, THE LENS REMAINS IMPLANTED. ATTEMPTS TO OBTAIN ADDITIONAL INFORMATION HAVE NOT BEEN SUCCESSFUL.Event Description: THE REPORTER INDICATED THAT THE SURGEON IMPLANTED AN IMPLANTABLE COLLAMER LENS INTO THE PATIENT'S …	-9.5/+4.0/085	OD	Physician	12/02/2021	2021	21	Male
https://www.accessdata.fda.gov/scripts/cdrh/cfdocs/cfMAUDE/Detail.CFM?MDRFOI__ID=13173112&pc=QCB	2023826-2022-00054	2021-12-06 05:00:00	Injury	STAAR SURGICAL COMPANY	2022-01-05 05:00:00	QCB	IMPLANTABLE COLLAMER LENS (ICL)	Inadequacy of Device Shape and/or Size	Appropriate Clinical Signs, Symptoms, Conditions Term / Code Not Available; No Clinical Signs, Symptoms or Conditions	NA	Event Description: THE REPORTER INDICATED THE SURGEON IMPLANTED A 13.2MM VTICMO13.2 IMPLANTABLE COLLAMER LENS, -15.00/+1.0/083, INTO THE PATIENTS RIGHT EYE (OD) ON (B)(6) 2021. THE LENS WAS REPORTED AS EXCESSIVE VAULTING AND REMAINED IMPLANTED. THE CAUSE OF THE EVENT WAS DUE TO PATIENT RELATED FACTOR (POTENTIAL RETRO-IRIS CYSTS BUT NOT SURE). ADDITIONAL INFORMATION HAS BEEN REQUESTED BUT NONE HAS…	-15.00/+1.0/083	OD	Physician	12/08/2021	2021	28	Male
https://www.accessdata.fda.gov/scripts/cdrh/cfdocs/cfMAUDE/Detail.CFM?MDRFOI__ID=13256336&pc=QCB	2023826-2022-00136	2021-11-23 05:00:00	Injury	STAAR SURGICAL COMPANY	2022-01-13 05:00:00	QCB	IMPLANTABLE COLLAMER LENS	Inadequacy of Device Shape and/or Size	Appropriate Clinical Signs, Symptoms, Conditions Term / Code Not Available; No Clinical Signs, Symptoms or Conditions	P030016	Event Description: THE REPORTER STATES AN IMPLANTABLE COLLAMER LENS WAS IMPLANTED INTO THE PATIENT'S RIGHT (OD) EYE. THE SURGEON REPORTS EXCESSIVE VAULT. ATTEMPTS TO OBTAIN ADDITIONAL INFORMATION HAVE NOT BEEN SUCCESSFUL. Manufacturer Narrative: AGE: UNK. SEX: UNK. WEIGHT: UNK. ETHNICITY: UNK. RACE: UNK. DATE OF EVENT: UNK. PRODUCT CODE: UNK. MODEL #: UNK. IMPLANT DATE: UNK. DEVICE MANUFACTURER D…	-12.5/+1.0/101	OD	Physician	12/22/2021	2021	37	Male
https://www.accessdata.fda.gov/scripts/cdrh/cfdocs/cfMAUDE/Detail.CFM?MDRFOI__ID=13596387&pc=QCB	2023826-2022-00478	2022-01-24 05:00:00	Injury	STAAR SURGICAL COMPANY	2022-02-24 05:00:00	QCB	IMPLANTABLE COLLAMER LENS (ICL)	Inadequacy of Device Shape and/or Size	Appropriate Clinical Signs, Symptoms, Conditions Term / Code Not Available; No Clinical Signs, Symptoms or Conditions	N/A	Event Description: THE REPORTER INDICATED THAT THE SURGEON IMPLANTED A 13.2MM VTICMO 13.2 IMPLANTABLE COLLAMER LENS OF -16.50/3.0/084 (SPHERE/CYLINDER/AXIS) INTO THE PATIENT'S RIGHT EYE (OD) ON (B)(6) 2022. PATIENT EXPERIENCED EXCESSIVE VAULT. ON (B)(6) 2022 THE LENS WAS EXPLANTED AND ON THE SAME DAY DIFFERENT SURGERY A SHORTER LENGTH REPLACEMENT LENS WAS IMPLANTED AND THE PROBLEM WAS RESOLVED.Ev…	-16.50/3.0/084	OD	Physician	01/25/2022	2022	33	Female
https://www.accessdata.fda.gov/scripts/cdrh/cfdocs/cfMAUDE/Detail.CFM?MDRFOI__ID=13670784&pc=QCB	2023826-2022-00615		Injury	STAAR SURGICAL COMPANY	2022-03-04 05:00:00	QCB	IMPLANTABLE COLLAMER LENS (ICL)	Inadequacy of Device Shape and/or Size	Appropriate Clinical Signs, Symptoms, Conditions Term / Code Not Available; No Clinical Signs, Symptoms or Conditions	NA	Event Description: THE REPORTER INDICATED THAT A 13.2MM VTICMO13.2 IMPLANTABLE COLLAMER LENS OF -16.0/1.0/036 (SPHERE/CYLINDER/AXIS) WAS IMPLANTED INTO THE PATIENT'S LEFT EYE (OS) ON (B)(6) 2021. ON (B)(6) 2022 THE LENS WAS EXPLANTED. ON THE SAME DATE IN A SEPARATE SURGERY THE LENS WAS REPLACED WITH A SHORTER LENGTH LENS DUE TO EXCESSIVE VAULT AND SIGNIFICANT REDUCTION OF IRIDO-CORNEAL ANGELS. TH…	-16.0/1.0/036	OS	Physician	02/24/2022	2022		Female
https://www.accessdata.fda.gov/scripts/cdrh/cfdocs/cfMAUDE/Detail.CFM?MDRFOI__ID=14115476&pc=QCB	2023826-2022-00826		Malfunction	STAAR SURGICAL COMPANY	2022-04-14 04:00:00	QCB	IMPLANTABLE COLLAMER LENS (ICL)	Inadequacy of Device Shape and/or Size	Appropriate Clinical Signs, Symptoms, Conditions Term / Code Not Available; No Clinical Signs, Symptoms or Conditions		Event Description: THE REPORTER INDICATED THAT A 12.6MM VTICM5 12.6 IMPLANTABLE COLLAMER LENS OF -12.0/3.5/092 (SPHERE/CYLINDER/AXIS) WAS IMPLANTED INTO THE PATIENT'S RIGHT EYE (OD) AS AN EXCHANGE LENS ON (B)(6) 2022 TO RESOLVE EXCESSIVE VAULT. REPORTER STATES THAT THE VAULT STILL SEEMS TOO HIGH. LENS REMAINS IMPLANTED. Manufacturer Narrative: ADDITIONAL DATA: B5- THE PATIENT EXPERIENCED GLAZY, H…	-12.0/3.5/092	OD	Physician	03/15/2022	2022		Male
https://www.accessdata.fda.gov/scripts/cdrh/cfdocs/cfMAUDE/Detail.CFM?MDRFOI__ID=14270697&pc=QCB	2023826-2022-01342	2022-03-31 04:00:00	Injury	STAAR SURGICAL COMPANY	2022-05-03 04:00:00	QCB	IMPLANTABLE COLLAMER LENS (ICL)	Inadequacy of Device Shape and/or Size	Appropriate Clinical Signs, Symptoms, Conditions Term / Code Not Available; No Clinical Signs, Symptoms or Conditions		Event Description: THE REPORTER INDICATED THAT AN IMPLANTABLE COLLAMER LENS OF UNKNOWN MODEL AND POWER WAS IMPLANTED INTO THE PATIENT'S LEFT EYE (OS) ON AN UNKNOWN DATE. REPORTEDLY EXCESSIVE VAULT WAS OBSERVED. NO FURTHER INFORMATION HAS BEEN PROVIDED. ATTEMPTS TO OBTAIN ADDITIONAL INFORMATION HAVE NOT BEEN SUCCESSFUL. IF ADDITIONAL INFORMATION IS RECEIVED A SUPPLEMENTAL MEDWATCH REPORT WILL BE S…	-15.0/1.5/071	OS	Physician	03/31/2022	2022
https://www.accessdata.fda.gov/scripts/cdrh/cfdocs/cfMAUDE/Detail.CFM?MDRFOI__ID=14270802&pc=QCB	2023826-2022-01341	2022-03-31 04:00:00	Injury	STAAR SURGICAL COMPANY	2022-05-03 04:00:00	QCB	IMPLANTABLE COLLAMER LENS (ICL)	Inadequacy of Device Shape and/or Size	Appropriate Clinical Signs, Symptoms, Conditions Term / Code Not Available; No Clinical Signs, Symptoms or Conditions		Event Description: THE REPORTER INDICATED THAT AN IMPLANTABLE COLLAMER LENS OF UNKNOWN MODEL AND POWER WAS IMPLANTED INTO THE PATIENT'S RIGHT EYE (OD) ON AN UNKNOWN DATE. REPORTEDLY EXCESSIVE VAULT WAS OBSERVED. NO FURTHER INFORMATION HAS BEEN PROVIDED. ATTEMPTS TO OBTAIN ADDITIONAL INFORMATION HAVE NOT BEEN SUCCESSFUL. IF ADDITIONAL INFORMATION IS RECEIVED A SUPPLEMENTAL MEDWATCH REPORT WILL BE …	-15.00/1.0/101	OD	Physician	03/31/2022	2022
https://www.accessdata.fda.gov/scripts/cdrh/cfdocs/cfMAUDE/Detail.CFM?MDRFOI__ID=14554422&pc=QCB	2023826-2022-01728		Malfunction	STAAR SURGICAL COMPANY	2022-05-31 04:00:00	QCB	IMPLANTABLE COLLAMER LENS (ICL)	Inadequacy of Device Shape and/or Size	Appropriate Clinical Signs, Symptoms, Conditions Term / Code Not Available; No Clinical Signs, Symptoms or Conditions	P030016	Event Description: THE REPORTER INDICATED THAT THE SURGEON IMPLANTED A 13.2MM VTICM5_13.2; -10.50/0.5/087 (SPHERE/CYLINDER/AXIS) IMPLANTABLE COLLAMER LENS INTO THE PATIENT'S RIGHT EYE (OD). THE SURGEON REPORTS "SIGNIFICANT POSTOPERATIVE VAULTING". LENS REMAINS IMPLANTED. IF ADDITIONAL INFORMATION IS RECEIVED A SUPPLEMENTAL MEDWATCH REPORT WILL BE SUBMITTED. Manufacturer Narrative: B5 - PATIENT AL…	-10.50/0.5/087	OD	Other Health Care Professional	05/04/2022	2022		Female
https://www.accessdata.fda.gov/scripts/cdrh/cfdocs/cfMAUDE/Detail.CFM?MDRFOI__ID=14554431&pc=QCB	2023826-2022-01729		Malfunction	STAAR SURGICAL COMPANY	2022-05-31 04:00:00	QCB	IMPLANTABLE COLLAMER LENS (ICL)	Inadequacy of Device Shape and/or Size	Appropriate Clinical Signs, Symptoms, Conditions Term / Code Not Available; No Clinical Signs, Symptoms or Conditions	P030016	Event Description: THE REPORTER INDICATED THAT THE SURGEON IMPLANTED A 13.2MM VTICMO13.2; -17.50/1.5/090 (SPHERE/CYLINDER/AXIS) IMPLANTABLE COLLAMER LENS INTO THE PATIENT'S LEFT EYE (OS). THE SURGEON REPORTS "SIGNIFICANT POSTOPERATIVE VAULTING". LENS REMAINS IMPLANTED. IF ADDITIONAL INFORMATION IS RECEIVED A SUPPLEMENTAL MEDWATCH REPORT WILL BE SUBMITTED. Manufacturer Narrative: CORRECTED DATA: B…	-17.50/1.5/090	OS	Other Health Care Professional	05/04/2022	2022		Female
https://www.accessdata.fda.gov/scripts/cdrh/cfdocs/cfMAUDE/Detail.CFM?MDRFOI__ID=14639205&pc=QCB	2023826-2022-01793	2022-01-03 05:00:00	Injury	STAAR SURGICAL COMPANY	2022-06-08 04:00:00	QCB	IMPLANTABLE COLLAMER LENS (ICL)	Inadequacy of Device Shape and/or Size	Appropriate Clinical Signs, Symptoms, Conditions Term / Code Not Available; No Clinical Signs, Symptoms or Conditions	P030016	Event Description: THE REPORTER INDICATED THE SURGEON IMPLANTED A 13.7MM VTICM5_13.7 IMPLANTABLE COLLAMER LENS, -13.00/+2.0/042 (SPHERE/CYLINDER/AXIS), IN THE PATIENT'S RIGHT EYE (OD), ON (B)(6) 2022. THE LENS WAS EXPLANTED ON (B)(6) 2022 DUE TO EXCESSIVE VAULTING. THE LENS WAS REPLACED WITH A SHORTER LENS AND THE PROBLEM WAS RESOLVED. Manufacturer Narrative: B5- THE REPORTER INDICATED THE SURGEO…	-13.00/+2.0/042	OD	Physician	05/12/2022	2022	45	Female
https://www.accessdata.fda.gov/scripts/cdrh/cfdocs/cfMAUDE/Detail.CFM?MDRFOI__ID=14805947&pc=QCB	2023826-2022-02007	2022-04-11 04:00:00	Injury	STAAR SURGICAL COMPANY	2022-06-24 04:00:00	QCB	IMPLANTABLE COLLAMER LENS (ICL)	Inadequacy of Device Shape and/or Size	Appropriate Clinical Signs, Symptoms, Conditions Term / Code Not Available; No Clinical Signs, Symptoms or Conditions	P030016	Event Description: THE REPORTER INDICATED THAT A 12.6MM VTICM512.6 IMPLANTABLE COLLAMER LENS OF -15.5/3.0/094 (SPHERE/CYLINDER/AXIS) WAS IMPLANTED INTO THE PATIENT'S LEFT EYE (OS) ON (B)(6) 2022. ON (B)(6) 2022, THE LENS WAS EXCHANGED FOR A SHOTER LENGTH LENS DUE TO EXCESSIVE VAULT. THE PROBLEM WAS RESOLVED. REPORTEDLY. "INITIAL LENS REPLACED WITH A SMALLER ONE AND THE VAULT IS IDEAL NOW. PATIENT…	-15.5/3.0/094	OS	Physician	05/26/2022	2022	21	Female
https://www.accessdata.fda.gov/scripts/cdrh/cfdocs/cfMAUDE/Detail.CFM?MDRFOI__ID=15506733&pc=QCB	2023826-2022-03360	2022-07-06 04:00:00	Injury	STAAR SURGICAL COMPANY	2022-09-29 04:00:00	QCB	IMPLANTABLE COLLAMER LENS (ICL)	Device Dislodged or Dislocated	Appropriate Clinical Signs, Symptoms, Conditions Term / Code Not Available; No Clinical Signs, Symptoms or Conditions	P030016	Event Description: THE REPORTER INDICATED THAT A 13.2MM VTICM13.2 IMPLANTABLE COLLAMER LENS OF -9.5/1/109 (SPHERE/CYLINDER/AXIS) WAS IMPLANTED IN THE PATIENT'S RIGHT EYE (OD) ON (B)(6) 2022. ON (B)(6) 2022, THE LENS WAS EXCHANGED FOR A SAME SIZE LENGTH, SPHERICAL LENS DUE TO LENS ROTATION NOT ASSOCIATED WITH LOW VAULT. REPORTEDLY, "TORIC LENS GOT ROTATED TO 90 DEGREES AND PATIENT WAS UNHAPPY WITH…	-9.5/1/109	OD	Physician	09/01/2022	2022	34	Male
https://www.accessdata.fda.gov/scripts/cdrh/cfdocs/cfMAUDE/Detail.CFM?MDRFOI__ID=15643337&pc=QCB	2023826-2022-03627	2022-08-25 04:00:00	Injury	STAAR SURGICAL COMPANY	2022-10-20 04:00:00	QCB	IMPLANTABLE COLLAMER LENS (ICL)	Inadequacy of Device Shape and/or Size; Patient-Device Incompatibility	Appropriate Clinical Signs, Symptoms, Conditions Term / Code Not Available; No Clinical Signs, Symptoms or Conditions	P030016	Event Description: THE REPORTER INDICATED THAT A 13.7MM VTICM513.7 IMPLANTABLE COLLAMER LENS OF -8.0/4.0/021 (SPHERE/CYLINDER/AXIS) WAS IMPLANTED INTO A PATIENT'S EYE. IT WAS THEN REMOVED DUE TO THE LENS BEING, "TOO LARGE." A REPLACEMENT IS PLANNED. Manufacturer Narrative: ADDITIONAL INFORMATION: H6: 4581-SIGNIFICANT REDUCTION OF IRIDOCORNEAL ANGLES. 2682-PATIENT-RELATED FACTOR REPORTED. CLAIM # …	-8.0/4.0/021	NA	Physician	09/20/2022	2022	38	Male
https://www.accessdata.fda.gov/scripts/cdrh/cfdocs/cfMAUDE/Detail.CFM?MDRFOI__ID=15795263&pc=QCB	2023826-2022-04001	2022-07-25 04:00:00	Injury	STAAR SURGICAL COMPANY	2022-11-14 05:00:00	QCB	IMPLANTABLE COLLAMER LENS (ICL)	Inadequacy of Device Shape and/or Size; Appropriate Term/Code Not Available	Appropriate Clinical Signs, Symptoms, Conditions Term / Code Not Available; No Clinical Signs, Symptoms or Conditions	P030016	Event Description: THE REPORTER INDICATED THAT A 12.1MM VTICMO 12.1 IMPLANTABLE COLLAMER LENS OF -16.50/3.5/113 (SPHERE/CYLINDER/AXIS) WAS IMPLANTED INTO THE PATIENTS RIGHT EYE (OD) ON AN UNKNOWN DATE. ON (B)(6) 2022 THE LENS WAS EXCHANGED FOR A LONGER LENGTH LENS DUE TO SLIGHT CHANGE OF LENS RX. Manufacturer Narrative: (B)(4). CLAIM#: (B)(4). Manufacturer Narrative: ADDITIONAL INFORMATION: B5: T…	-16.50/3.5/113	OD	Physician	10/16/2022	2022	31	Male
https://www.accessdata.fda.gov/scripts/cdrh/cfdocs/cfMAUDE/Detail.CFM?MDRFOI__ID=15829645&pc=QCB	2023826-2022-04193	2022-07-31 04:00:00	Injury	STAAR SURGICAL COMPANY	2022-11-18 05:00:00	QCB	IMPLANTABLE COLLAMER LENS (ICL)	Misfocusing; Inadequacy of Device Shape and/or Size; Patient Device Interaction Problem	Appropriate Clinical Signs, Symptoms, Conditions Term / Code Not Available; No Clinical Signs, Symptoms or Conditions	P030016	Event Description: THE REPORTER INDICATED THAT A 12.6MM VTICMO12.6 -8.5/2.5/110 (SPHERE/CYLINDER/AXIS) IMPLANTABLE COLLAMER LENS WAS IMPLANTED INTO THE PATIENTS RIGHT EYE (OD) ON (B)(6) 2022. ON (B)(6) 2022 ASTIGMATISM WAS ASSESSED. LOW VAULT WAS OBSERVED AND ON 31-AUG-2022 THE LENS WAS EXCHANGED FOR A LONGER LENS OF DIFFERENT POWER AND THE PROBLEM RESOLVED. THE REPORTER STATED, "THE PATIENT IS A…	-8.5/2.5/110	OD	Physician	10/21/2022	2022	27	Male
https://www.accessdata.fda.gov/scripts/cdrh/cfdocs/cfMAUDE/Detail.CFM?MDRFOI__ID=15946942&pc=QCB	2023826-2022-04446	2022-08-12 04:00:00	Injury	STAAR SURGICAL COMPANY	2022-12-08 05:00:00	QCB	IMPLANTABLE COLLAMER LENS (ICL)	Inadequacy of Device Shape and/or Size	Appropriate Clinical Signs, Symptoms, Conditions Term / Code Not Available; No Clinical Signs, Symptoms or Conditions	P030016	Event Description: THE REPORTER INDICATED THAT A 13.2MM VTICMO13.2 IMPLANTABLE COLLAMER LENS OF -12.5/2.0/093 (SPHERE/CYLINDER/AXIS) WAS IMPLANTED INTO THE PATIENT'S RIGHT EYE (OD) ON 03-AUG-2022. ON 23-AUG-2022, THE LENS WAS EXCHANGED FOR A SHORTER LENGTH LENS DUE TO EXCESSIVE VAULT. THE EXCHANGE RESOLVED THE PROBLEM. CAUSE IS REPORTED AS UNKNOWN. REPORTEDLY STATUS OF THE EYE IS, "DISCOMFORT, GO…	-12.5/2.0/093	OD	Physician	11/10/2022	2022	23	Female
https://www.accessdata.fda.gov/scripts/cdrh/cfdocs/cfMAUDE/Detail.CFM?MDRFOI__ID=15952648&pc=QCB	2023826-2022-04350	2022-11-04 04:00:00	Injury	STAAR SURGICAL COMPANY	2022-12-09 05:00:00	QCB	IMPLANTABLE COLLAMER LENS (ICL)	Inadequacy of Device Shape and/or Size	Appropriate Clinical Signs, Symptoms, Conditions Term / Code Not Available; No Clinical Signs, Symptoms or Conditions	P030016	Event Description: THE REPORTER INDICATED THE SURGEON IMPLANTED AND REMOVED A 13.2MM VTICM5_13.2 IMPLANTABLE COLLAMER LENS, -13.00/+1.5/080 (SPHERE/CYLINDER/AXIS), FROM THE PATIENTS LEFT EYE (OS) DUE TO THE BIG SIZE OF THE LENS. THE LENS WAS REPLACED WITH A SMALLER SIZE LENS. THERE WAS NO PATIENT INJURY. ADDITIONAL INFORMATION HAS BEEN REQUESTED BUT NONE HAS BEEN FORTHCOMING. Manufacturer Narrati…	-13.00/+1.5/080	OS	Other Health Care Professional	11/17/2022	2022	29	Female
https://www.accessdata.fda.gov/scripts/cdrh/cfdocs/cfMAUDE/Detail.CFM?MDRFOI__ID=16275251&pc=QCB	2023826-2023-00259	2022-11-28 05:00:00	Malfunction	STAAR SURGICAL COMPANY	2023-01-31 05:00:00	QCB	IMPLANTABLE COLLAMER LENS (ICL)	Inadequacy of Device Shape and/or Size; Adverse Event Without Identified Device or Use Problem	Appropriate Clinical Signs, Symptoms, Conditions Term / Code Not Available; No Clinical Signs, Symptoms or Conditions	P030016	Event Description: THE REPORTER INDICATED THE SURGEON IMPLANTED A 12.6MM VTICM5_12.6 IMPLANTABLE COLLAMER LENS, -09.50/+1.0/109 (SPHERE/CYLINDER/AXIS). THE LENS WAS REMOVED. ADDITIONAL INFORMATION HAS BEEN REQUESTED BUT NONE HAS BEEN FORTHCOMING. Manufacturer Narrative: (B)(4). CLAIM # (B)(4). Manufacturer Narrative: ADDITIONAL DATA: H6: HEALTH IMPACT- CLINICAL CODE: 4581 - SIGNIFICANT REDUCTION …	-09.50/+1.0/109	NA	Physician	01/12/2023	2023	27	Female
https://www.accessdata.fda.gov/scripts/cdrh/cfdocs/cfMAUDE/Detail.CFM?MDRFOI__ID=16519786&pc=QCB	2023826-2023-00811	2023-01-25 05:00:00	Injury	STAAR SURGICAL COMPANY	2023-03-10 05:00:00	QCB	IMPLANTABLE COLLAMER LENS (ICL)	Inadequacy of Device Shape and/or Size	Appropriate Clinical Signs, Symptoms, Conditions Term / Code Not Available; No Clinical Signs, Symptoms or Conditions	P030016	Event Description: THE REPORTER INDICATED THAT A 13.7MM VTICM5_13.7 -10.50/1.0/090 (SPHERE/CYLINDER/AXIS) IMPLANTABLE COLLAMER LENS WAS IMPLANTED INTO THE PATIENTS LEFT EYE (OS) ON (B)(6) 2023. ON (B)(6) 2023 THE LENS WAS EXPLANTED DUE TO EXCESSIVE VAULT. CAUSE OF EVENT WAS UNKNOWN. Manufacturer Narrative: B5 - THE REPORTER INDICATED THAT THE SURGEON IMPLANTED A 13.7MM VTICM5_13.7 IMPLANTABLE COL…	-10.50/1.0/090	OS	Physician	12/19/2023	2023	33	Male
https://www.accessdata.fda.gov/scripts/cdrh/cfdocs/cfMAUDE/Detail.CFM?MDRFOI__ID=16530285&pc=QCB	2023826-2023-00748	2023-02-01 05:00:00	Injury	STAAR SURGICAL COMPANY	2023-03-13 04:00:00	QCB	IMPLANTABLE COLLAMER LENS (ICL)	Inadequacy of Device Shape and/or Size	Appropriate Clinical Signs, Symptoms, Conditions Term / Code Not Available; No Clinical Signs, Symptoms or Conditions	P030016	Event Description: THE REPORTER INDICATED THAT THE SURGEON IMPLANTED A 12.6MM VTICM5_12.6, -11.0/1.0/093 (SPHERE/CYLINDER/AXIS), IMPLANTABLE COLLAMER LENS INTO THE PATIENT'S LEFT EYE (OS) ON (B)(6)2023. THE LENS WAS REPLACED WITH A SHORTER LENGTH LENS DUE TO SIGNIFICANT REDUCTION OF IRIDO-CORNEAL ANGELS AND EXCESSIVE VAULT ON (B)(6) 2023. THIS RESOLVED THE PROBLEM. CAUSE OF THE EVENT IS REPORTED …	-11.0/1.0/093	OS	Physician	02/20/2023	2023	22	Female
https://www.accessdata.fda.gov/scripts/cdrh/cfdocs/cfMAUDE/Detail.CFM?MDRFOI__ID=16640712&pc=QCB	2023826-2023-01014	2022-03-30 04:00:00	Injury	STAAR SURGICAL COMPANY	2023-03-29 04:00:00	QCB	IMPLANTABLE COLLAMER LENS (ICL)	Inadequacy of Device Shape and/or Size; Improper or Incorrect Procedure or Method	Appropriate Clinical Signs, Symptoms, Conditions Term / Code Not Available; No Clinical Signs, Symptoms or Conditions	P030016	Event Description: THE REPORTER INDICATED THAT A 13.2MM VTICM513.2 IMPLANTABLE COLLAMER LENS OF -13.0/4.5/103 (SPHERE/CYLINDER/AXIS) WAS IMPLANTED INTO THE PATIENT'S LEFT EYE (OS) ON (B)(6)2022. ON (B)(6)2022, THE LENS WAS REMOVED AND IN A SUBSEQUENT SURGERY LATER THAT DAY, A LONGER LENGTH LENS WAS IMPLANTED DUE TO EXCESSIVE VAULT AND SIGNIFICANT REDUCTION OF IRIOCORNEAL ANGLES. REPORTEDLY, "SIGN…	-13.0/4.5/103	OS	Physician	02/28/2023	2023	27	Female
https://www.accessdata.fda.gov/scripts/cdrh/cfdocs/cfMAUDE/Detail.CFM?MDRFOI__ID=16678165&pc=QCB	2023826-2023-01166		Malfunction	STAAR SURGICAL COMPANY	2023-04-04 04:00:00	QCB	IMPLANTABLE COLLAMER LENS (ICL)	No Apparent Adverse Event	Appropriate Clinical Signs, Symptoms, Conditions Term / Code Not Available; No Clinical Signs, Symptoms or Conditions	UNK	Event Description: THE REPORTER INDICATED THE SURGEON IMPLANTED A TORIC ICL INTO THE PATIENTS LEFT EYE (OS). THE SURGEON REQUESTED A VECTOR ANALYSIS TO REDUCE THE ASTIGMATISM SO THE PATIENT MIGHT BE SATISFIED WITH A LITTLE MYOPIA. THE LENS REMAINED IMPLANTED. ADDITIONAL INFORMATION HAS BEEN REQUESTED BUT NONE HAS BEEN FORTHCOMING. Manufacturer Narrative: PATIENT AGE OR DATE OF BIRTH : UNKNOWN. SE…	-12.50/+3.5/091	OS	Other Health Care Professional	03/10/2023	2023		Male
https://www.accessdata.fda.gov/scripts/cdrh/cfdocs/cfMAUDE/Detail.CFM?MDRFOI__ID=16773857&pc=QCB	2023826-2023-01422	2022-12-31 05:00:00	Injury	STAAR SURGICAL COMPANY	2023-04-19 04:00:00	QCB	IMPLANTABLE COLLAMER LENS (ICL)	Off-Label Use; Inadequacy of Device Shape and/or Size	Appropriate Clinical Signs, Symptoms, Conditions Term / Code Not Available; No Clinical Signs, Symptoms or Conditions	P030016	Event Description: THE REPORTER INDICATED THAT A 12.6MM VTICMO12.6 IMPLANTABLE COLLAMER LENS OF -6.0/1.0/102 (SPHERE/CYLINDER/AXIS) WAS IMPLANTED INTO THE PATIENT'S LEFT EYE (OS) ON (B)(6) 2019. ON (B)(6) 2023, THE LENS WAS REMOVED DUE TO EXCESSIVE VAULT AND SIGNIFICANT REDUCTION OF IRIDOCORNEAL ANGLES. THE PROBLEM WAS RESOLVED. REPORTEDLY, "SIGNIFICANT REDUCTION OF IRIDOCORNEAL ANGLES, AND ANTER…	-6.0/1.0/102	OS	Physician	03/22/2023	2023	28	Female
https://www.accessdata.fda.gov/scripts/cdrh/cfdocs/cfMAUDE/Detail.CFM?MDRFOI__ID=16773858&pc=QCB	2023826-2023-01421	2022-12-31 05:00:00	Injury	STAAR SURGICAL COMPANY	2023-04-19 04:00:00	QCB	IMPLANTABLE COLLAMER LENS (ICL)	Off-Label Use; Inadequacy of Device Shape and/or Size	Appropriate Clinical Signs, Symptoms, Conditions Term / Code Not Available; No Clinical Signs, Symptoms or Conditions	P030016	Event Description: THE REPORTER INDICATED THAT A 12.6MM VTICMO12.6 IMPLANTABLE COLLAMER LENS OF -5.0/1.0/092 (SPHERE/CYLINDER/AXIS) WAS IMPLANTED INTO THE PATIENT'S RIGHT EYE (OD) ON (B)(6) 2019. ON (B)(6)2023, THE LENS WAS REMOVED DUE TO EXCESSIVE VAULT, SIGNIFICANT REDUCTION OF ENDOTHELIAL CELL COUNT OR SIGNIFICANT ENDOTHELIAL CELL LOSS, AND SIGNIFICANT REDUCTION OF IRIDOCORNEAL ANGLES. THE PRO…	-5.0/1.0/092	OD	Physician	03/22/2023	2023	28	Female
https://www.accessdata.fda.gov/scripts/cdrh/cfdocs/cfMAUDE/Detail.CFM?MDRFOI__ID=16811645&pc=QCB	2023826-2023-01493		Injury	STAAR SURGICAL COMPANY	2023-04-25 04:00:00	QCB	IMPLANTABLE COLLAMER LENS (ICL)	Inadequacy of Device Shape and/or Size	Appropriate Clinical Signs, Symptoms, Conditions Term / Code Not Available; No Clinical Signs, Symptoms or Conditions	P030016	Event Description: THE REPORTER INDICATED THE SURGEON IMPLANTED A 13.2MM VTICM5_13.2 IMPLANTABLE COLLAMER LENS, -12.00/+4.0/087 (SPHERE/CYLINDER/AXIS), INTO THE PATIENTS RIGHT EYE (OD) ON (B)(6) 2022. THE LENS WAS REMOVED ON (B)(6) 2023 DUE TO EXCESSIVE VAULTING. THE LENS WAS REPLACED WITH A SHORTER LENS AND THE PROBLEM WAS RESOLVED. Manufacturer Narrative: CLAIM # :(B)(4). Manufacturer Narrative…	-12.00/+4.0/087	OD	Physician	03/27/2023	2023		Female
https://www.accessdata.fda.gov/scripts/cdrh/cfdocs/cfMAUDE/Detail.CFM?MDRFOI__ID=16857792&pc=QCB	2023826-2023-01600	2023-03-05 05:00:00	Injury	STAAR SURGICAL COMPANY	2023-05-02 04:00:00	QCB	IMPLANTABLE COLLAMER LENS (ICL)	Inadequacy of Device Shape and/or Size	Appropriate Clinical Signs, Symptoms, Conditions Term / Code Not Available; No Clinical Signs, Symptoms or Conditions	P030016	Event Description: THE REPORTER INDICATED THAT THE SURGEON IMPLANTED A 13.2MM VTICMO13.2 IMPLANTABLE COLLAMER LENS OF DIOPTER -10.0/+1.5/090 INTO THE PATIENT'S RIGHT EYE (OD) ON (B)(6) 2023 . THE LENS WAS EXCHANGED ON (B)(6) 2023 FOR A SHORTER LENGTH LENS DUE TO EXCESSIVE VAULT. THIS RESOLVED THE PROBLEM. CAUSE OF EVENT REPORTED AS UNKNOWN. Manufacturer Narrative: CORRECTED DATA: B5- THE REPORTER…	-10.0/+1.5/090	OD	Physician	04/03/2023	2023	27	Female
https://www.accessdata.fda.gov/scripts/cdrh/cfdocs/cfMAUDE/Detail.CFM?MDRFOI__ID=16922359&pc=QCB	2023826-2023-01778		Malfunction	STAAR SURGICAL COMPANY	2023-05-12 04:00:00	QCB	IMPLANTABLE COLLAMER LENS (ICL)	Inadequacy of Device Shape and/or Size	Appropriate Clinical Signs, Symptoms, Conditions Term / Code Not Available; No Clinical Signs, Symptoms or Conditions	P030016	Event Description: THE REPORTER INDICATED THE SURGEON IMPLANTED A 13.2MM VTICM5_13.2 IMPLANTABLE COLLAMER LENS, -17.50/+3.0/113, INTO THE PATIENTS RIGHT EYE (OD). THE LENS WAS REPORTED AS HIGH VAULTING, WITH NARROW IRIDOCORNEAL ANGLE. THE IRIS IS PUSHED BACK BY THE ICL. THE LENS REMAINED IMPLANTED. ADDITIONAL INFORMATION HAS BEEN REQUESTED BUT NONE HAS BEEN FORTHCOMING. Manufacturer Narrative: A3…	-17.50/+3.0/113	OD	Physician	04/13/2023	2023
https://www.accessdata.fda.gov/scripts/cdrh/cfdocs/cfMAUDE/Detail.CFM?MDRFOI__ID=16922573&pc=QCB	2023826-2023-01779		Malfunction	STAAR SURGICAL COMPANY	2023-05-12 04:00:00	QCB	IMPLANTABLE COLLAMER LENS (ICL)	Inadequacy of Device Shape and/or Size	Appropriate Clinical Signs, Symptoms, Conditions Term / Code Not Available; No Clinical Signs, Symptoms or Conditions	P030016	Event Description: THE REPORTER INDICATED THE SURGEON IMPLANTED A 13.2MM VTICM5_13.2 IMPLANTABLE COLLAMER LENS, -17.50/+3.5/075, INTO THE PATIENTS LEFT EYE (OS). THE LENS WAS REPORTED AS HIGH VAULTING, WITH NARROW IRIDOCORNEAL ANGLE. THE IRIS IS PUSHED BACK BY THE ICL. THE LENS REMAINED IMPLANTED. ADDITIONAL INFORMATION HAS BEEN REQUESTED BUT NONE HAS BEEN FORTHCOMING. Manufacturer Narrative: COR…	-17.50/+3.5/075	OS	Physician	04/13/2023	2023
https://www.accessdata.fda.gov/scripts/cdrh/cfdocs/cfMAUDE/Detail.CFM?MDRFOI__ID=16924894&pc=QCB	2023826-2023-01815	2022-10-20 04:00:00	Injury	STAAR SURGICAL COMPANY	2023-05-12 04:00:00	QCB	IMPLANTABLE COLLAMER LENS (ICL)	Inadequacy of Device Shape and/or Size	Appropriate Clinical Signs, Symptoms, Conditions Term / Code Not Available; No Clinical Signs, Symptoms or Conditions	P030016	Event Description: THE REPORTER INDICATED THAT THE SURGEON IMPLANTED A 12.6MM VTICMO12.6 IMPLANTABLE COLLAMER LENS OF DIOPTER -6.5/+1.5/170 INTO THE PATIENT'S RIGHT EYE (OD) ON (B)(6) 2022. THE LENS WAS EXCHANGED ON (B)(6) 2023 FOR A SHORTER LENGTH LENS DUE TO EXCESSIVE VAULT. THIS RESOLVED THE PROBLEM. CAUSE OF EVENT REPORTED AS UNKNOWN. Manufacturer Narrative: B5: STATEMENT SHOULD INCLUDE SIGNI…	-6.5/+1.5/170	OD	Physician	04/17/2023	2023	29	Female
https://www.accessdata.fda.gov/scripts/cdrh/cfdocs/cfMAUDE/Detail.CFM?MDRFOI__ID=17066353&pc=QCB	2023826-2023-02195	2023-05-02 04:00:00	Injury	STAAR SURGICAL COMPANY	2023-06-05 04:00:00	QCB	IMPLANTABLE COLLAMER LENS (ICL)	Inadequacy of Device Shape and/or Size	Appropriate Clinical Signs, Symptoms, Conditions Term / Code Not Available; No Clinical Signs, Symptoms or Conditions	P030016	Event Description: THE REPORTER INDICATED THAT THE SURGEON IMPLANTED A 13.2MM VTICMO 13.2 IMPLANTABLE COLLAMER LENS OF DIOPTER -10.0/1.5/092 (SPHERE/CYLINDER/AXIS) INTO THE PATIENT'S RIGHT EYE (OD) ON (B)(6) 2023. ON (B)(6) 2023 THE LENS WAS EXCHANGED FOR A SHORTER LENGTH LENS DUE TO EXCESSIVE VAULT AND SIGNIFICANT REDUCTION OF IRIDO-CORNEAL ANGLES. REPORTEDLY, "ICL IS CENTERED AND POSITIVE." THE…	-10.0/1.5/092	OD	Physician	05/30/2023	2023	27	Female
https://www.accessdata.fda.gov/scripts/cdrh/cfdocs/cfMAUDE/Detail.CFM?MDRFOI__ID=17066783&pc=QCB	2023826-2023-02194	2023-05-02 04:00:00	Injury	STAAR SURGICAL COMPANY	2023-06-05 04:00:00	QCB	IMPLANTABLE COLLAMER LENS (ICL)	Inadequacy of Device Shape and/or Size	Appropriate Clinical Signs, Symptoms, Conditions Term / Code Not Available; No Clinical Signs, Symptoms or Conditions	P030016	Event Description: THE REPORTER INDICATED THAT THE SURGEON IMPLANTED A 13.2MM VTICMO 13.2 IMPLANTABLE COLLAMER LENS OF DIOPTER -10.5/2.0/086 (SPHERE/CYLINDER/AXIS) INTO THE PATIENT'S LEFT EYE (OS) ON (B)(6) 2023. ON (B)(6) 2023 THE LENS WAS EXCHANGED FOR A SHORTER LENGTH LENS DUE TO EXCESSIVE VAULT AND SIGNIFICANT REDUCTION OF IRIDO-CORNEAL ANGLES. REPORTEDLY, "ICL IS CENTERED AND POSITIVE." THE …	-10.5/2.0/086	OS	Physician	05/30/2023	2023	27	Female
https://www.accessdata.fda.gov/scripts/cdrh/cfdocs/cfMAUDE/Detail.CFM?MDRFOI__ID=17093870&pc=QCB	2023826-2023-02207	2022-12-31 05:00:00	Injury	STAAR SURGICAL COMPANY	2023-06-08 04:00:00	QCB	IMPLANTABLE COLLAMER LENS (ICL)	Inadequacy of Device Shape and/or Size	Appropriate Clinical Signs, Symptoms, Conditions Term / Code Not Available; No Clinical Signs, Symptoms or Conditions	P030016	Event Description: THE REPORTER INDICATED THAT THE SURGEON IMPLANTED A 13.2MM VTICMO 13.2 IMPLANTABLE COLLAMER LENS OF DIOPTER -10.0/1.0/001 (SPHERE/CYLINDER/AXIS) INTO THE PATIENT'S LEFT EYE (OS) ON (B)(6) 2022. ON (B)(6) 2023 THE LENS WAS EXCHANGED FOR A SHORTER LENGTH LENS DUE TO EXCESSIVE VAULT AND SIGNIFICANT REDUCTION OF IRIDO-CORNEAL ANGLES. THE PROBLEM WAS RESOLVED. THE CAUSE OF THE EVENT…	-10.0/1.0/001	OS	Physician	06/01/2023	2023	22	Female
https://www.accessdata.fda.gov/scripts/cdrh/cfdocs/cfMAUDE/Detail.CFM?MDRFOI__ID=17195741&pc=QCB	2023826-2023-02535	2023-03-08 05:00:00	Injury	STAAR SURGICAL COMPANY	2023-06-23 04:00:00	QCB	IMPLANTABLE COLLAMER LENS (ICL)	Inadequacy of Device Shape and/or Size	Appropriate Clinical Signs, Symptoms, Conditions Term / Code Not Available; No Clinical Signs, Symptoms or Conditions	P030016	Event Description: THE REPORTER INDICATED THAT THE SURGEON IMPLANTED A 12.6MM VTICM5_12.6 IMPLANTABLE COLLAMER LENS OF DIOPTER -8.5/+1.0/089 INTO THE PATIENT'S LEFT EYE (OS) ON (B)(6) 2023. EXCESSIVE VAULT AND SIGNIFICANT REDUCTION OF IRIDO-CORNEAL ANGLES WERE NOTED. THE LENS WAS REMOVED ON (B)(6) 2023 AND A SHORTER LENGTH LENS WAS IMPLANTED ON (B)(6) 2023. THE PROBLEM WAS RESOLVED. CAUSE OF THE …	-8.5/+1.0/089	OS	Physician	05/29/2023	2023	35	Male
https://www.accessdata.fda.gov/scripts/cdrh/cfdocs/cfMAUDE/Detail.CFM?MDRFOI__ID=17253107&pc=QCB	2023826-2023-02623	2023-06-03 04:00:00	Injury	STAAR SURGICAL COMPANY	2023-07-03 04:00:00	QCB	IMPLANTABLE COLLAMER LENS (ICL)	Off-Label Use; Inadequacy of Device Shape and/or Size	Appropriate Clinical Signs, Symptoms, Conditions Term / Code Not Available; No Clinical Signs, Symptoms or Conditions	P030016	Event Description: THE REPORTER INDICATED THAT THE SURGEON IMPLANTED A 13.2MM VTICMO 13.2 IMPLANTABLE COLLAMER LENS OF DIOPTER -10.5/1.0/092 (SPHERE/CYLINDER/AXIS) INTO THE PATIENT'S LEFT EYE (OS) ON (B)(6) 2020. ON (B)(6) 2023 THE LENS WAS EXCHANGED FOR A SHORTER LENGTH LENS DUE TO EXCESSIVE VAULT AND SIGNIFICANT REDUCTION OF IRIDO-CORNEAL ANGLES. THE PROBLEM WAS RESOLVED. THE CAUSE OF THE EVENT…	-10.5/1.0/092	OS	Physician	06/24/2023	2023	33	Female
https://www.accessdata.fda.gov/scripts/cdrh/cfdocs/cfMAUDE/Detail.CFM?MDRFOI__ID=17283702&pc=QCB	2023826-2023-02639	2023-05-06 04:00:00	Injury	STAAR SURGICAL COMPANY	2023-07-07 04:00:00	QCB	IMPLANTABLE COLLAMER LENS (ICL)	Inadequacy of Device Shape and/or Size	Appropriate Clinical Signs, Symptoms, Conditions Term / Code Not Available; No Clinical Signs, Symptoms or Conditions	P030016	Event Description: THE REPORTER INDICATED THAT THE SURGEON IMPLANTED A 13.2MM VTICMO 13.2 IMPLANTABLE COLLAMER LENS OF DIOPTER -10.5/1.5/095 (SPHERE / CYLINDER / AXIS) INTO THE PATIENT'S LEFT EYE (OS) ON (B)(6) 2023. ON (B)(6) 2023 THE LENS WAS EXCHANGED FOR A SHORTER LENGTH LENS DUE TO EXCESSIVE VAULT AND SIGNIFICANT REDUCTION OF IRIDO-CORNEAL ANGLES. THE PROBLEM WAS RESOLVED. THE CAUSE OF THE E…	-10.5/1.5/095 (SPHERE / CYLINDER / AXIS)	OS	Physician	06/28/2023	2023	26	Female
https://www.accessdata.fda.gov/scripts/cdrh/cfdocs/cfMAUDE/Detail.CFM?MDRFOI__ID=17375164&pc=QCB	2023826-2023-02976	2023-06-02 04:00:00	Injury	STAAR SURGICAL COMPANY	2023-07-21 04:00:00	QCB	IMPLANTABLE COLLAMER LENS (ICL)	No Apparent Adverse Event	Appropriate Clinical Signs, Symptoms, Conditions Term / Code Not Available; No Clinical Signs, Symptoms or Conditions	P030016	Event Description: THE REPORTER INDICATED THAT A 13.2MM VTICMO13.2 IMPLANTABLE COLLAMER LENS OF -5.0/6.0/092 (SPHERE / CYLINDER / AXIS) WAS IMPLANTED INTO THE PATIENT'S LEFT EYE (OS) ON (B)(6) 2023. THE LENS WAS INTRAOPERATIVELY IMPLANTED AND REMOVED DUE TO A LENS TEAR/BREAK DURING INJECTION/DELIVERY INTO THE EYE. THERE WAS PATIENT CONTACT AND PATIENT INJURY. ADDITIONAL SUTURE WAS PERFORMED. CAUS…	-5.0/6.0/092	OS	Physician	07/05/2023	2023	27	Male
https://www.accessdata.fda.gov/scripts/cdrh/cfdocs/cfMAUDE/Detail.CFM?MDRFOI__ID=17375205&pc=QCB	2023826-2023-02975	2023-06-02 04:00:00	Injury	STAAR SURGICAL COMPANY	2023-07-21 04:00:00	QCB	IMPLANTABLE COLLAMER LENS (ICL)	No Apparent Adverse Event	Appropriate Clinical Signs, Symptoms, Conditions Term / Code Not Available; No Clinical Signs, Symptoms or Conditions	P030016	Event Description: THE REPORTER INDICATED THAT A 13.2MM VTICMO13.2 IMPLANTABLE COLLAMER LENS OF -5.0/6.0/092 (SPHERE/CYLINDER/AXIS) WAS IMPLANTED INTO THE PATIENT'S LEFT EYE (OS) ON (B)(6) 2023. THE LENS WAS INTRAOPERATIVELY IMPLANTED AND REMOVED DUE TO A LENS TEAR/BREAK DURING INJECTION/DELIVERY INTO THE EYE. THERE WAS PATIENT CONTACT AND PATIENT INJURY. IRIS PROLAPSE WAS OBSERVED. ADDITIONAL SU…	-5.0/6.0/092	OS	Physician	07/05/2023	2023	27	Male
https://www.accessdata.fda.gov/scripts/cdrh/cfdocs/cfMAUDE/Detail.CFM?MDRFOI__ID=17376516&pc=QCB	2023826-2023-02960	2023-06-22 04:00:00	Injury	STAAR SURGICAL COMPANY	2023-07-24 04:00:00	QCB	IMPLANTABLE COLLAMER LENS (ICL)	Device Dislodged or Dislocated	Appropriate Clinical Signs, Symptoms, Conditions Term / Code Not Available; No Clinical Signs, Symptoms or Conditions	P030016	Event Description: THE REPORTER INDICATED THE SURGEON IMPLANTED A 12.1MM VTICMO12.1 IMPLANTABLE COLLAMER LENS, -06.50/+1.0/087 (SPHERE/CYLINDER/AXIS), IN THE PATIENTS LEFT EYE (OS), ON (B)(6) 2023. THE LENS WAS EXPLANTED ON (B)(6) 2023 DUE TO LENS ROTATION NOT ASSOCIATED TO A LOW VAULT. THE LENS WAS REPLACED WITH A LONGER LENS AND THE PROBLEM WAS RESOLVED. THE CAUSE OF THE EVENT WAS UNKNOWN. Manu…	-06.50/+1.0/087	OS	Physician	07/05/2023	2023	25	Male
https://www.accessdata.fda.gov/scripts/cdrh/cfdocs/cfMAUDE/Detail.CFM?MDRFOI__ID=17410569&pc=QCB	2023826-2023-03166	2023-01-31 05:00:00	Injury	STAAR SURGICAL COMPANY	2023-07-27 04:00:00	QCB	IMPLANTABLE COLLAMER LENS (ICL)	Inadequacy of Device Shape and/or Size	Appropriate Clinical Signs, Symptoms, Conditions Term / Code Not Available; No Clinical Signs, Symptoms or Conditions	P030016	Event Description: THE REPORTER INDICATED THAT THE SURGEON IMPLANTED A 13.2MM VTICMO 13.2 IMPLANTABLE COLLAMER LENS OF DIOPTER -10.5/1.0/095 (SPHERE/CYLINDER/AXIS) INTO THE PATIENT'S RIGHT EYE (OD) ON (B)(6) 2023. ON (B)(6) 2023 THE LENS WAS EXCHANGED FOR A SHORTER LENGTH LENS DUE TO EXCESSIVE VAULT AND SIGNIFICANT REDUCTION OF IRIDO-CORNEAL ANGLES. THE PROBLEM WAS RESOLVED. THE CAUSE OF THE EVEN…	-10.5/1.0/095	OD	Physician	07/21/2023	2023	26	Female
https://www.accessdata.fda.gov/scripts/cdrh/cfdocs/cfMAUDE/Detail.CFM?MDRFOI__ID=17410576&pc=QCB	2023826-2023-03171	2023-07-14 04:00:00	Injury	STAAR SURGICAL COMPANY	2023-07-27 04:00:00	QCB	IMPLANTABLE COLLAMER LENS (ICL)	Off-Label Use; Inadequacy of Device Shape and/or Size	Appropriate Clinical Signs, Symptoms, Conditions Term / Code Not Available; No Clinical Signs, Symptoms or Conditions	P030016	Event Description: THE REPORTER INDICATED THAT THE SURGEON IMPLANTED A 13.2MM VTICMO 13.2 IMPLANTABLE COLLAMER LENS OF DIOPTER -12.0/2.5/090 (SPHERE/CYLINDER/AXIS) INTO THE PATIENT'S RIGHT EYE (OD) ON (B)(6) 2023. ON (B)(6) 2023 THE LENS WAS EXCHANGED FOR A SHORTER LENGTH LENS DUE TO EXCESSIVE VAULT AND SIGNIFICANT REDUCTION OF IRIDO-CORNEAL ANGLES. THE PROBLEM WAS RESOLVED. THE CAUSE OF THE EVEN…	-12.0/2.5/090	OD	Physician	07/22/2023	2023	19	Female
https://www.accessdata.fda.gov/scripts/cdrh/cfdocs/cfMAUDE/Detail.CFM?MDRFOI__ID=17456036&pc=QCB	2023826-2023-03224	2023-06-18 04:00:00	Injury	STAAR SURGICAL COMPANY	2023-08-03 04:00:00	QCB	IMPLANTABLE COLLAMER LENS (ICL)	Inadequacy of Device Shape and/or Size; Adverse Event Without Identified Device or Use Problem	Appropriate Clinical Signs, Symptoms, Conditions Term / Code Not Available; No Clinical Signs, Symptoms or Conditions	P030016	Event Description: THE REPORTER INDICATED THAT A 13.7MM VTICMO13.7 IMPLANTABLE COLLAMER LENS OF -18.0/2.0/107 (SPHERE/CYLINDER/AXIS) WAS INTRAOPERATIVELY IMPLANTED AND REMOVED FROM THE PATIENT'S RIGHT EYE (OD) ON (B)(6) 2023. EXCESSIVE VAULT AND SIGNIFICANT REDUCTION OF IRIDOCORNEAL ANGLES WAS OBSERVED. LATER, A SHORTER LENGTH LENS WAS IMPLANTED AND THE PROBLEM WAS RESOLVED. REPORTEDLY, "SIZE 13.…	-18.0/2.0/107	OD	Physician	07/18/2023	2023	27	Female
https://www.accessdata.fda.gov/scripts/cdrh/cfdocs/cfMAUDE/Detail.CFM?MDRFOI__ID=17456037&pc=QCB	2023826-2023-03225	2023-06-18 04:00:00	Injury	STAAR SURGICAL COMPANY	2023-08-03 04:00:00	QCB	IMPLANTABLE COLLAMER LENS (ICL)	Inadequacy of Device Shape and/or Size; Adverse Event Without Identified Device or Use Problem	Appropriate Clinical Signs, Symptoms, Conditions Term / Code Not Available; No Clinical Signs, Symptoms or Conditions	P030016	Event Description: THE REPORTER INDICATED THAT A 13.7MM VTICMO13.7 IMPLANTABLE COLLAMER LENS OF -15.0/2.5/076 (SPHERE/CYLINDER/AXIS) WAS INTRAOPERATIVELY IMPLANTED , AND REMOVED FROM THE PATIENT'S LEFT EYE (OS) ON (B)(6) 2023. EXCESSIVE VAULT AND SIGNIFICANT REDUCTION OF IRIDOCORNEAL ANGLES WAS OBSERVED. LATER, A SHORTER LENGTH LENS WAS IMPLANTED AND THE PROBLEM WAS RESOLVED. REPORTEDLY, "SIZE 13…	-15.0/2.5/076	OS	Physician	07/18/2023	2023	27	Female
https://www.accessdata.fda.gov/scripts/cdrh/cfdocs/cfMAUDE/Detail.CFM?MDRFOI__ID=17495141&pc=QCB	2023826-2023-03366	2022-11-22 05:00:00	Injury	STAAR SURGICAL COMPANY	2023-08-09 04:00:00	QCB	IMPLANTABLE COLLAMER LENS (ICL)	Inadequacy of Device Shape and/or Size	Appropriate Clinical Signs, Symptoms, Conditions Term / Code Not Available; No Clinical Signs, Symptoms or Conditions	P030016	Event Description: THE REPORTER INDICATED THAT THE SURGEON IMPLANTED A 13.2MM VTICMO 13.2 IMPLANTABLE COLLAMER LENS OF DIOPTER -7.0/1.0/063 (SPHERE/CYLINDER/AXIS) INTO THE PATIENT'S RIGHT EYE (OD) ON (B)(6) 2022. ON (B)(6) 2023 THE LENS WAS EXCHANGED FOR A SHORTER LENGTH LENS DUE TO EXCESSIVE VAULT AND SIGNIFICANT REDUCTION OF IRIDO-CORNEAL ANGLES. THE PROBLEM WAS RESOLVED. THE CAUSE OF THE EVENT…	-7.0/1.0/063	OD	Physician	08/06/2023	2023	41	Female
https://www.accessdata.fda.gov/scripts/cdrh/cfdocs/cfMAUDE/Detail.CFM?MDRFOI__ID=17495144&pc=QCB	2023826-2023-03367	2022-11-23 05:00:00	Injury	STAAR SURGICAL COMPANY	2023-08-09 04:00:00	QCB	IMPLANTABLE COLLAMER LENS (ICL)	Inadequacy of Device Shape and/or Size	Appropriate Clinical Signs, Symptoms, Conditions Term / Code Not Available; No Clinical Signs, Symptoms or Conditions	P030016	Event Description: THE REPORTER INDICATED THAT THE SURGEON IMPLANTED A 13.2MM VTICMO 13.2 IMPLANTABLE COLLAMER LENS OF DIOPTER -7.0/1.0/111 (SPHERE/CYLINDER/AXIS) INTO THE PATIENT'S LEFT EYE (OS) ON (B)(6) 2022. ON (B)(6) 2023 THE LENS WAS EXCHANGED FOR A SHORTER LENGTH LENS DUE TO EXCESSIVE VAULT AND SIGNIFICANT REDUCTION OF IRIDO-CORNEAL ANGLES. THE PROBLEM WAS RESOLVED. THE CAUSE OF THE EVENT …	-7.0/1.0/111	OS	Physician	08/06/2023	2023	41	Female
https://www.accessdata.fda.gov/scripts/cdrh/cfdocs/cfMAUDE/Detail.CFM?MDRFOI__ID=17561396&pc=QCB	2023826-2023-03496	2023-07-13 04:00:00	Injury	STAAR SURGICAL COMPANY	2023-08-16 04:00:00	QCB	IMPLANTABLE COLLAMER LENS (ICL)	Inadequacy of Device Shape and/or Size	Appropriate Clinical Signs, Symptoms, Conditions Term / Code Not Available; No Clinical Signs, Symptoms or Conditions	P030016	Event Description: THE REPORTER INDICATED THAT THE SURGEON IMPLANTED A 12.6MM VTICM5_ 12.6 IMPLANTABLE COLLAMER LENS OF DIOPTER -3.5/1.0/003 (SPHERE / CYLINDER/AXIS) INTO THE PATIENT'S RIGHT EYE (OD) ON (B)(6) 2023. ON (B)(6) 2023, THE LENS WAS EXCHANGED FOR A SHORTER LENGTH LENS DUE TO EXCESSIVE VAULT AND SIGNIFICANT REDUCTION OF IRIDO-CORNEAL ANGLES. THE PROBLEM WAS RESOLVED. THE CAUSE OF THE E…	-3.5/1.0/003	OD	Physician	08/11/2023	2023	24	Male
https://www.accessdata.fda.gov/scripts/cdrh/cfdocs/cfMAUDE/Detail.CFM?MDRFOI__ID=17653872&pc=QCB	2023826-2023-03439	2023-08-07 04:00:00	Injury	STAAR SURGICAL COMPANY	2023-08-30 04:00:00	QCB	IMPLANTABLE COLLAMER LENS (ICL)	Inadequacy of Device Shape and/or Size	Appropriate Clinical Signs, Symptoms, Conditions Term / Code Not Available; No Clinical Signs, Symptoms or Conditions	P030016	Event Description: THE REPORTER INDICATED THAT A 13.7MM VTICMO 13.7 IMPLANTABLE COLLAMER LENS OF -16.00/1.5/167 (SPHERE/CYLINDER/AXIS) WAS IMPLANTED INTO THE PATIENTS RIGHT EYE (OD) ON (B)(6) 2023. EXCESSIVE VAULT WAS OBSERVED. THE LENS REMAINS IMPLANTED. REPORTER STATES. "PATIENT SCHEDULED FOR REPLACEMENT OF ICL." IF ADDITIONAL INFORMATION IS RECEIVED A SUPPLEMENTAL MEDWATCH REPORT WILL BE SUBMI…	-16.00/1.5/167	OD	Physician	08/08/2023	2023	41	Male
https://www.accessdata.fda.gov/scripts/cdrh/cfdocs/cfMAUDE/Detail.CFM?MDRFOI__ID=17656782&pc=QCB	2023826-2023-03804	2023-08-02 04:00:00	Malfunction	STAAR SURGICAL COMPANY	2023-08-30 04:00:00	QCB	IMPLANTABLE COLLAMER LENS (ICL)	Off-Label Use; No Apparent Adverse Event	Appropriate Clinical Signs, Symptoms, Conditions Term / Code Not Available; No Clinical Signs, Symptoms or Conditions	P030016	Event Description: THE REPORTER INDICATED THAT THE SURGEON IMPLANTED A 13.2MM VTICMO 13.2 IMPLANTABLE COLLAMER LENS OF DIOPTER -9.5/1.0/090 (SPHERE/CYLINDER/AXIS) INTO THE PATIENT'S LEFT EYE (OS) ON (B)(6) 2023. THE PATIENT EXPERIENCED EXCESSIVE VAULTING AND SIGNIFICANT REDUCTION OF IRIDO-CORNEAL ANGLES. INTRAOPERATIVELY THE LENS WAS REMOVED AND REPLACED WITH A SHORTER LENGTH LENS AND THE PROBLEM…	-9.5/1.0/090	OS	Physician	08/26/2023	2023	26	Female
https://www.accessdata.fda.gov/scripts/cdrh/cfdocs/cfMAUDE/Detail.CFM?MDRFOI__ID=17722464&pc=QCB	2023826-2023-03838	2023-08-15 04:00:00	Malfunction	STAAR SURGICAL COMPANY	2023-09-11 04:00:00	QCB	IMPLANTABLE COLLAMER LENS (ICL)	Inadequacy of Device Shape and/or Size	Appropriate Clinical Signs, Symptoms, Conditions Term / Code Not Available; No Clinical Signs, Symptoms or Conditions	P030016	Event Description: THE REPORTER INDICATED THAT THE SURGEON QUESTIONS HIGH VAULT. ADDITIONAL INFORMATION HAS BEEN REQUESTED BUT NONE HAS BEEN FORTHCOMING.Event Description: THE REPORTER INDICATED THAT THE SURGEON IMPLANTED A 13.2MM VTICM5_13.2, -11.5/4.0/093 (SPHERE/CYLINDER/AXIS), IMPLANTABLE COLLAMER LENS INTO THE PATIENT'S RIGHT EYE (OD) ON (B)(6) 2023. LENS WAS EXPLANTED ON (B)(6) 2023 DUE TO …	-11.5/4.0/093	OD	Physician	08/24/2023	2023	38	Male
https://www.accessdata.fda.gov/scripts/cdrh/cfdocs/cfMAUDE/Detail.CFM?MDRFOI__ID=17770322&pc=QCB	2023826-2023-04116	2023-07-18 04:00:00	Injury	STAAR SURGICAL COMPANY	2023-09-18 04:00:00	QCB	IMPLANTABLE COLLAMER LENS (ICL)	Inadequacy of Device Shape and/or Size	Appropriate Clinical Signs, Symptoms, Conditions Term / Code Not Available; No Clinical Signs, Symptoms or Conditions	P030016	Event Description: THE REPORTER INDICATED THAT A 13.7MM VTICM5 13.7 IMPLANTABLE COLLAMER LENS OF -10.00/2.0/120 (SPHERE/CYLINDER/AXIS) WAS IMPLANTED INTO THE PATIENTS RIGHT EYE (OD) ON AN UNKNOWN DATE. EXCESSIVE VAULT WAS OBSERVED. THE LENS WAS EXPLANTED AND A REPLACEMENT LENS WAS IMPLANTED OF SHORTER LENGTH. ATTEMPTS TO OBTAIN ADDITIONAL INFORMATION HAVE NOT BEEN SUCCESSFUL. IF ADDITIONAL INFORM…	-10.00/2.0/120	OD	Physician	08/23/2023	2023
https://www.accessdata.fda.gov/scripts/cdrh/cfdocs/cfMAUDE/Detail.CFM?MDRFOI__ID=17777467&pc=QCB	2023826-2023-04125	2023-09-11 04:00:00	Malfunction	STAAR SURGICAL COMPANY	2023-09-19 04:00:00	QCB	IMPLANTABLE COLLAMER LENS (ICL)	Off-Label Use; No Apparent Adverse Event	Appropriate Clinical Signs, Symptoms, Conditions Term / Code Not Available; No Clinical Signs, Symptoms or Conditions	P030016	Event Description: THE REPORTER INDICATED THAT THE SURGEON IMPLANTED A 13.2MM VTICMO 13.2 IMPLANTABLE COLLAMER LENS OF DIOPTER -11.5/2.0/094 (SPHERE/CYLINDER/AXIS) INTO THE PATIENT'S RIGHT EYE (OD) ON (B)(6) 2023. THE PATIENT EXPERIENCED EXCESSIVE VAULTING AND SIGNIFICANT REDUCTION OF IRIDO-CORNEAL ANGLES. INTRAOPERATIVELY THE LENS WAS REMOVED AND REPLACED WITH A SHORTER LENGTH LENS AND THE PROBL…	-11.5/2.0/094	OD	Physician	09/14/2023	2023	20	Female
https://www.accessdata.fda.gov/scripts/cdrh/cfdocs/cfMAUDE/Detail.CFM?MDRFOI__ID=17848827&pc=QCB	2023826-2023-04244	2023-09-05 04:00:00	Injury	STAAR SURGICAL COMPANY	2023-09-29 04:00:00	QCB	IMPLANTABLE COLLAMER LENS (ICL)	Inadequacy of Device Shape and/or Size; Adverse Event Without Identified Device or Use Problem	Appropriate Clinical Signs, Symptoms, Conditions Term / Code Not Available; No Clinical Signs, Symptoms or Conditions	P030016	Event Description: THE REPORTER INDICATED THAT A 13.2MM VTICM513.2 IMPLANTABLE COLLAMER LENS OF -9.5/1.0/001 (SPHERE/CYLINDER/AXIS) WAS IMPLANTED INTO THE PATIENT'S LEFT EYE (OS) ON (B)(6) 2023. ON (B)(6) 2023, THE LENS WAS EXCHANGED FOR A SHORTER LENGTH LENS DUE TO EXCESSIVE VAULT AND SIGNIFICANT REDUCTION OF IRIDOCORNEAL ANGLES. THE PROBLEM WAS RESOLVED. CAUSE OF THE EVENT IS UNKNOWN. REPORTEDL…	-9.5/1.0/001	OS	Physician	09/22/2023	2023	40	Female
https://www.accessdata.fda.gov/scripts/cdrh/cfdocs/cfMAUDE/Detail.CFM?MDRFOI__ID=17848836&pc=QCB	2023826-2023-04243	2023-09-05 04:00:00	Injury	STAAR SURGICAL COMPANY	2023-09-29 04:00:00	QCB	IMPLANTABLE COLLAMER LENS (ICL)	Inadequacy of Device Shape and/or Size; Adverse Event Without Identified Device or Use Problem	Appropriate Clinical Signs, Symptoms, Conditions Term / Code Not Available; No Clinical Signs, Symptoms or Conditions	P030016	Event Description: THE REPORTER INDICATED THAT A 13.2MM VTICM513.2 IMPLANTABLE COLLAMER LENS OF -8.0/0.5/093 (SPHERE/CYLINDER/AXIS) WAS IMPLANTED INTO THE PATIENT'S RIGHT EYE (OD) ON (B)(6) 2023. ON (B)(6) 2023, THE LENS WAS EXCHANGED FOR A SHORTER LENGTH LENS DUE TO EXCESSIVE VAULT AND SIGNIFICANT REDUCTION OF IRIDOCORNEAL ANGLES. THE PROBLEM WAS RESOLVED. CAUSE OF THE EVENT IS UNKNOWN. REPORTED…	-8.0/0.5/093	OD	Physician	09/22/2023	2023	40	Female
https://www.accessdata.fda.gov/scripts/cdrh/cfdocs/cfMAUDE/Detail.CFM?MDRFOI__ID=17924961&pc=QCB	2023826-2023-04523	2021-03-21 04:00:00	Injury	STAAR SURGICAL COMPANY	2023-10-12 04:00:00	QCB	IMPLANTABLE COLLAMER LENS (ICL)	Inadequacy of Device Shape and/or Size	Appropriate Clinical Signs, Symptoms, Conditions Term / Code Not Available; No Clinical Signs, Symptoms or Conditions	P030016	Event Description: THE REPORTER INDICATED THAT THE SURGEON IMPLANTED A 13.2MM VTICMO 13.2 IMPLANTABLE COLLAMER LENS OF DIOPTER -9.0/0.5/073 (SPHERE/CYLINDER/AXIS) INTO THE PATIENT'S RIGHT EYE (OD) ON (B)(6) 2023. ON (B)(6) 2023 THE LENS WAS EXCHANGED FOR A SHORTER LENGTH LENS DUE TO EXCESSIVE VAULT AND SIGNIFICANT REDUCTION OF IRIDO-CORNEAL ANGLES. THE PROBLEM WAS RESOLVED. THE CAUSE OF THE EVENT…	-9.0/0.5/073	OD	Physician	10/10/2023	2023	19	Female
https://www.accessdata.fda.gov/scripts/cdrh/cfdocs/cfMAUDE/Detail.CFM?MDRFOI__ID=17962098&pc=QCB	2023826-2023-04552	2023-09-22 04:00:00	Injury	STAAR SURGICAL COMPANY	2023-10-18 04:00:00	QCB	IMPLANTABLE COLLAMER LENS (ICL)	Off-Label Use; Inadequacy of Device Shape and/or Size; Patient-Device Incompatibility	Appropriate Clinical Signs, Symptoms, Conditions Term / Code Not Available; No Clinical Signs, Symptoms or Conditions	P030016	Event Description: THE REPORTER INDICATED THE SURGEON IMPLANTED A 12.6MM VTICM5_12.6 IMPLANTABLE COLLAMER LENS, -12.00/+1.5/089 (SPHERE/CYLINDER/AXIS), INTO THE PATIENTS RIGHT EYE (OD). THE LENS HAD EXCESSIVE VAULTING AND SHALLOW AC. THE LENS REMAINED IMPLANTED. ADDITIONAL INFORMATION HAS BEEN REQUESTED BUT NONE HAS BEEN FORTHCOMING. Manufacturer Narrative: A2: UNK A3: UNK A4: UNK A5: UNK A6: UNK…	-12.00/+1.5/089	OD	Physician	09/28/2023	2023	25	Female
https://www.accessdata.fda.gov/scripts/cdrh/cfdocs/cfMAUDE/Detail.CFM?MDRFOI__ID=17978576&pc=QCB	2023826-2023-04553	2023-09-22 04:00:00	Injury	STAAR SURGICAL COMPANY	2023-10-20 04:00:00	QCB	IMPLANTABLE COLLAMER LENS (ICL)	Off-Label Use; Inadequacy of Device Shape and/or Size; Patient-Device Incompatibility	Appropriate Clinical Signs, Symptoms, Conditions Term / Code Not Available; No Clinical Signs, Symptoms or Conditions	P030016	Event Description: THE REPORTER INDICATED THE SURGEON IMPLANTED A 12.6MM VTICM5_12.6 IMPLANTABLE COLLAMER LENS, -06.50/+1.5/090 (SPHERE/CYLINDER/AXIS), INTO THE PATIENTS LEFT EYE (OS). THE LENS HAD EXCESSIVE VAULTING AND SHALLOW AC. THE LENS REMAINED IMPLANTED. ADDITIONAL INFORMATION HAS BEEN REQUESTED BUT NONE HAS BEEN FORTHCOMING. Manufacturer Narrative: A2: UNK. A3: UNK. A4: UNK. A5: UNK. A6: …	-06.50/+1.5/090	OS	Physician	09/28/2023	2023	25	Female
https://www.accessdata.fda.gov/scripts/cdrh/cfdocs/cfMAUDE/Detail.CFM?MDRFOI__ID=17981337&pc=QCB	2023826-2023-04704	2023-10-06 04:00:00	Injury	STAAR SURGICAL COMPANY	2023-10-20 04:00:00	QCB	IMPLANTABLE COLLAMER LENS (ICL)	Inadequacy of Device Shape and/or Size	Appropriate Clinical Signs, Symptoms, Conditions Term / Code Not Available; No Clinical Signs, Symptoms or Conditions	P030016	Event Description: THE REPORTER INDICATED THAT THE SURGEON IMPLANTED A 13.2MM VTICM5_13.2IMPLANTABLE COLLAMER LENS OF DIOPTER -9.5/3.0/090 (SPHERE/CYLINDER/AXIS) INTO THE PATIENT'S RIGHT EYE (OD) ON (B)(6)2023. ON (B)(6)2023 THE LENS WAS EXCHANGED FOR A SHORTER LENGTH LENS DUE TO EXCESSIVE VAULT AND SIGNIFICANT REDUCTION OF IRIDO-CORNEAL ANGLES. THE PROBLEM WAS RESOLVED. THE CAUSE OF THE EVENT WA…	-9.5/3.0/090	OD	Physician	10/19/2023	2023	23	Female
https://www.accessdata.fda.gov/scripts/cdrh/cfdocs/cfMAUDE/Detail.CFM?MDRFOI__ID=18022609&pc=QCB	2023826-2023-04734		Malfunction	STAAR SURGICAL COMPANY	2023-10-27 04:00:00	QCB	IMPLANTABLE COLLAMER LENS (ICL)	No Apparent Adverse Event	Appropriate Clinical Signs, Symptoms, Conditions Term / Code Not Available; No Clinical Signs, Symptoms or Conditions	P030016	Event Description: THE REPORTER INDICATED THAT A 13.2MM VTICMO13.2 IMPLANTABLE COLLAMER LENS OF A -14.5/4.0/034 (SPHERE/CYLINDER/AXIS) WAS IMPLANTED INTO THE PATIENT'S LEFT EYE (OS). THE PATIENT WAS DISSATISFIED WITH THE RESULTS. Manufacturer Narrative: H6 - HEALTH EFFECT CLINICAL CODE: 4581 - PATIENT DISSATISFIED. CLAIM#: (B)(4). Manufacturer Narrative: H6: WORK ORDER SEARCH: NO SIMILAR COMPLAIN…	-14.5/4.0/034	OS	Physician	10/17/2023	2023		Male
https://www.accessdata.fda.gov/scripts/cdrh/cfdocs/cfMAUDE/Detail.CFM?MDRFOI__ID=18022610&pc=QCB	2023826-2023-04733		Malfunction	STAAR SURGICAL COMPANY	2023-10-27 04:00:00	QCB	IMPLANTABLE COLLAMER LENS (ICL)	No Apparent Adverse Event	Appropriate Clinical Signs, Symptoms, Conditions Term / Code Not Available; No Clinical Signs, Symptoms or Conditions	P030016	Event Description: THE REPORTER INDICATED THAT A 13.2MM VTICM513.2 IMPLANTABLE COLLAMER LENS OF A -13.0/3.5/110 (SPHERE/CYLINDER/AXIS) WAS IMPLANTED INTO THE PATIENT'S RIGHT EYE (OD). THE PATIENT WAS DISSATISFIED WITH THE RESULTS. Manufacturer Narrative: A4-A6:UNK. H6: WORK ORDER SEARCH: NO SIMILAR COMPLAINTS WITHIN ASSOCIATED LOTS WERE FOUND. CLAIM# (B)(4). Manufacturer Narrative: H6 - HEALTH EF…	-13.0/3.5/110	OD	Physician	10/17/2023	2023		Male
https://www.accessdata.fda.gov/scripts/cdrh/cfdocs/cfMAUDE/Detail.CFM?MDRFOI__ID=18075206&pc=QCB	2023826-2023-04921	2023-10-13 04:00:00	Injury	STAAR SURGICAL COMPANY	2023-11-06 05:00:00	QCB	IMPLANTABLE COLLAMER LENS (ICL)	Adverse Event Without Identified Device or Use Problem; No Apparent Adverse Event	Appropriate Clinical Signs, Symptoms, Conditions Term / Code Not Available; No Clinical Signs, Symptoms or Conditions	P030016	Event Description: THE REPORTER INDICATED THAT A 13.2MM, VTICM5_13.2, -5.50/1.0/078 (SPHERE/CYLINDER/AXIS), IMPLANTABLE COLLAMER LENS WAS IMPLANTED INTO THE PATIENT'S LEFT EYE (OS) ON (B)(6) 2023. OVAL SHAPE PUPIL AT TEMPORAL WAS OBSERVED. LENS REMAINS IMPLANTED. ADDITIONAL INFORMATION HAS BEEN REQUESTED BUT NONE HAS BEEN FORTHCOMING. Manufacturer Narrative: H6 - HEALTH EFFECT CLINICAL CODE 4581:…	-5.50/1.0/078	OS	Physician	10/17/2023	2023	38	Female
https://www.accessdata.fda.gov/scripts/cdrh/cfdocs/cfMAUDE/Detail.CFM?MDRFOI__ID=18175031&pc=QCB	2023826-2023-05106	2023-11-02 04:00:00	Injury	STAAR SURGICAL COMPANY	2023-11-20 05:00:00	QCB	IMPLANTABLE COLLAMER LENS (ICL)	Inadequacy of Device Shape and/or Size	Appropriate Clinical Signs, Symptoms, Conditions Term / Code Not Available; No Clinical Signs, Symptoms or Conditions	P030016	Event Description: THE REPORTER INDICATED THAT THE SURGEON IMPLANTED A 13.7MM VTICM5_13.7, -4.0/5.0/101 (SPHERE/CYLINDER/AXIS), IMPLANTABLE COLLAMER LENS INTO THE PATIENT'S LEFT EYE (OS) ON (B)(6) 2023. THE LENS WAS EXPLANTED ON (B)(6) 2023 DUE TO EXCESSIVE VAULT. THIS DID NOT RESOLVED THE PROBLEM. CAUSE OF THE EVENT IS REPORTED AS DEVICE: MISS THE CORRECT SIZING OF THE LENS. REPORTEDLY, REPLACEM…	-4.0/5.0/101	OS	Physician	11/16/2023	2023	48	Female
https://www.accessdata.fda.gov/scripts/cdrh/cfdocs/cfMAUDE/Detail.CFM?MDRFOI__ID=18188487&pc=QCB	2023826-2023-05286	2023-10-16 04:00:00	Injury	STAAR SURGICAL COMPANY	2023-11-21 05:00:00	QCB	IMPLANTABLE COLLAMER LENS (ICL)	Off-Label Use; Inadequacy of Device Shape and/or Size	Appropriate Clinical Signs, Symptoms, Conditions Term / Code Not Available; No Clinical Signs, Symptoms or Conditions	P030016	Event Description: THE REPORTER INDICATED THAT THE SURGEON IMPLANTED A 12.6MM VTICMO 12.6 IMPLANTABLE COLLAMER LENS OF DIOPTER -11.5/1.0/167 (SPHERE/CYLINDER/AXIS) INTO THE PATIENT'S LEFT EYE (OS) ON (B)(6) 2022. ON (B)(6) 2023 THE LENS WAS EXCHANGED FOR A SHORTER LENGTH LENS DUE TO EXCESSIVE VAULT AND SIGNIFICANT REDUCTION OF IRIDO-CORNEAL ANGLES. THE PROBLEM WAS RESOLVED. THE CAUSE OF THE EVENT…	-11.5/1.0/167	OS	Physician	11/01/2023	2023	33	Female
https://www.accessdata.fda.gov/scripts/cdrh/cfdocs/cfMAUDE/Detail.CFM?MDRFOI__ID=18188488&pc=QCB	2023826-2023-05285	2023-10-16 04:00:00	Injury	STAAR SURGICAL COMPANY	2023-11-21 05:00:00	QCB	IMPLANTABLE COLLAMER LENS (ICL)	Off-Label Use; Inadequacy of Device Shape and/or Size	Appropriate Clinical Signs, Symptoms, Conditions Term / Code Not Available; No Clinical Signs, Symptoms or Conditions	P030016	Event Description: THE REPORTER INDICATED THAT THE SURGEON IMPLANTED A 12.6MM VTICMO 12.6 IMPLANTABLE COLLAMER LENS OF DIOPTER -10.5/1.5/155 (SPHERE/CYLINDER/AXIS) INTO THE PATIENT'S RIGHT EYE (OD) ON (B)(6) 2022. ON (B)(6) 2023 THE LENS WAS EXCHANGED FOR A SHORTER LENGTH LENS DUE TO EXCESSIVE VAULT AND SIGNIFICANT REDUCTION OF IRIDO-CORNEAL ANGLES. THE PROBLEM WAS RESOLVED. THE CAUSE OF THE EVEN…	-10.5/1.5/155	OD	Physician	11/01/2023	2023	33	Female
https://www.accessdata.fda.gov/scripts/cdrh/cfdocs/cfMAUDE/Detail.CFM?MDRFOI__ID=18348108&pc=QCB	2023826-2023-05463	2023-09-19 04:00:00	Injury	STAAR SURGICAL COMPANY	2023-12-18 05:00:00	QCB	IMPLANTABLE COLLAMER LENS (ICL)	Inadequacy of Device Shape and/or Size	Appropriate Clinical Signs, Symptoms, Conditions Term / Code Not Available; No Clinical Signs, Symptoms or Conditions	P030016	Event Description: THE REPORTER INDICATED THAT THE SURGEON IMPLANTED A 13.2MM VTICM5_ 13.2 IMPLANTABLE COLLAMER LENS OF DIOPTER -8.0/1.5/123 (SPHERE/CYLINDER/AXIS) INTO THE PATIENT'S RIGHT EYE (OD) ON (B)(6) 2023. ON 28-NOV-2023 THE LENS WAS EXCHANGED FOR A SHORTER LENGTH LENS DUE TO EXCESSIVE VAULT AND SIGNIFICANT REDUCTION OF IRIDO-CORNEAL ANGLES. THE PROBLEM WAS RESOLVED. THE CAUSE OF THE EVEN…	-8.0/1.5/123	OD	Physician	11/30/2023	2023	32	Female
https://www.accessdata.fda.gov/scripts/cdrh/cfdocs/cfMAUDE/Detail.CFM?MDRFOI__ID=18369666&pc=QCB	2023826-2023-05670	2023-12-09 05:00:00	Injury	STAAR SURGICAL COMPANY	2023-12-20 05:00:00	QCB	IMPLANTABLE COLLAMER LENS (ICL)	Inadequacy of Device Shape and/or Size	Appropriate Clinical Signs, Symptoms, Conditions Term / Code Not Available; No Clinical Signs, Symptoms or Conditions	P030016	Event Description: THE REPORTER INDICATED THAT THE SURGEON IMPLANTED A 13.7MM VICMO 13.7 IMPLANTABLE COLLAMER LENS OF DIOPTER -15.0/5.5/047 (SPHERE/CYLINDER/AXIS) INTO THE PATIENT'S LEFT EYE (OS) ON (B)(6) 2023. ON (B)(6) 2023 THE LENS WAS EXCHANGED FOR A SHORTER LENGTH LENS DUE TO EXCESSIVE VAULT AND SIGNIFICANT REDUCTION OF IRIDO-CORNEAL ANGLES. THE PROBLEM WAS RESOLVED. THE CAUSE OF THE EVENT …	-15.0/5.5/047	OS	Physician	12/12/2023	2023	38	Male
https://www.accessdata.fda.gov/scripts/cdrh/cfdocs/cfMAUDE/Detail.CFM?MDRFOI__ID=18406811&pc=QCB	2023826-2023-05800	2023-12-01 05:00:00	Injury	STAAR SURGICAL COMPANY	2023-12-27 05:00:00	QCB	IMPLANTABLE COLLAMER LENS (ICL)	Inadequacy of Device Shape and/or Size	Appropriate Clinical Signs, Symptoms, Conditions Term / Code Not Available; No Clinical Signs, Symptoms or Conditions	P030016	Event Description: THE REPORTER INDICATED THAT A 12.6MM VTICMO12.6 IMPLANTABLE COLLAMER LENS OF -8.0/1.5/091 (SPHERE/CYLINDER/AXIS) WAS IMPLANTED INTO THE PATIENT'S LEFT EYE (OS) ON (B)(6) 2023. ON 11-DEC-2023, THE LENS WAS REMOVED DUE TO LOW VAULT WITHOUT ROTATION AND THE PROBLEM WAS RESOLVED. THE CAUSE OF THE EVENT IS UNKNOWN. Manufacturer Narrative: A4-A6:UNK. H6: WORK ORDER SEARCH: NO SIMILAR…	-8.0/1.5/091	OS	Physician	12/19/2023	2023	34	Female
https://www.accessdata.fda.gov/scripts/cdrh/cfdocs/cfMAUDE/Detail.CFM?MDRFOI__ID=18406816&pc=QCB	2023826-2023-05799	2023-12-01 05:00:00	Injury	STAAR SURGICAL COMPANY	2023-12-27 05:00:00	QCB	IMPLANTABLE COLLAMER LENS (ICL)	Inadequacy of Device Shape and/or Size	Appropriate Clinical Signs, Symptoms, Conditions Term / Code Not Available; No Clinical Signs, Symptoms or Conditions	P030016	Event Description: THE REPORTER INDICATED THAT A 12.6MM VTICMO12.6 IMPLANTABLE COLLAMER LENS OF -8.5/1.0/072 (SPHERE/CYLINDER/AXIS) WAS IMPLANTED INTO THE PATIENT'S RIGHT EYE (OD) ON (B)(6) 2023. ON (B)(6) 2023, THE LENS WAS REMOVED DUE TO LOW VAULT WITHOUT ROTATION AND THE PROBLEM WAS RESOLVED. THE CAUSE OF THE EVENT IS UNKNOWN. Manufacturer Narrative: H6: WORK ORDER SEARCH: NO SIMILAR COMPLAINT…	-8.5/1.0/072	OD	Physician	12/19/2023	2023	34	Female
https://www.accessdata.fda.gov/scripts/cdrh/cfdocs/cfMAUDE/Detail.CFM?MDRFOI__ID=11334474&pc=QCB	2023826-2021-00366	2021-01-20 05:00:00	Injury	STAAR SURGICAL COMPANY AG	2021-02-16 05:00:00	QCB	IMPLANTABLE COLLAMER LENS (ICL)	Misfocusing	Appropriate Clinical Signs, Symptoms, Conditions Term / Code Not Available; No Clinical Signs, Symptoms or Conditions	NA#S-P#NA	Event Description: THE REPORTER INDICATED THE SURGEON IMPLANTED A 13.2MM VTICM13.2 IMPLANTABLE COLLAMER LENS, -08.00/+1.0/131, (SPHERE/CYLINDER/AXIS) INTO THE PATIENTS LEFT EYE (OS) ON (B)(6) 2011. THE PATIENT EXPERIENCED A REFRACTIVE CHANGE OVERTIME. THE LENS REMAINED IMPLANTED. THE CAUSE OF THE EVENT WAS UNKNOWN. ADDITIONAL INFORMATION HAS BEEN REQUESTED BUT NONE HAS BEEN FORTHCOMING. IF ADDITI…	-08.00/+1.0/131	OS		01/21/2021	2021	37
https://www.accessdata.fda.gov/scripts/cdrh/cfdocs/cfMAUDE/Detail.CFM?MDRFOI__ID=8372525&pc=QCB	2023826-2019-00315	2019-01-31 05:00:00	Malfunction	STAAR SURGICAL COMPANY	2019-02-26 05:00:00	QCB	IMPLANTABLE COLLAMER LENS	Misfocusing; Off-Label Use	Blurred Vision	N/A	Event Description: THE REPORTER STATED THAT THE SURGEON IMPLANTED A 13.2MM VTICM5_13.2 IMPLANTABLE COLLAMER LENS, -5.0/+2.5/146 (SPHERE/CYLINDER/AXIS) INTO THE PATIENT'S LEFT EYE (OS) ON (B)(6) 2018. THE SURGEON REPORTS REFRACTIVE SURPRISE. REPORTEDLY, LENS REMAINS IMPLANTED. THE CAUSE OF THE EVENT IS REPORTED AS UNKNOWN. Manufacturer Narrative: LENS WORK ORDER SEARCH: NO SIMILAR COMPLAINT TYPE E…	-5.0/+2.5/146	OS		01/31/2019	2019	30
https://www.accessdata.fda.gov/scripts/cdrh/cfdocs/cfMAUDE/Detail.CFM?MDRFOI__ID=8498014&pc=QCB	2023826-2019-00583		Malfunction	STAAR SURGICAL COMPANY	2019-04-09	QCB	IMPLANTABLE COLLAMER LENS (ICL)	Misfocusing; Inadequacy of Device Shape and/or Size	Blurred Vision	N/A	Event Description: THE REPORTER INDICATED THE SURGEON IMPLANTED A 13.2MM VTICM5_13.2 IMPLANTABLE COLLAMER LENS, -12.5/+1.0/084 (SPHERE/CYLINDER/AXIS) INTO THE PATIENT'S LEFT EYE (OS) ON (B)(6) 2019. THE SURGEON REPORTS THE VAULT IS A "BIT HIGH" AND THAT THE PATIENT COMPLAINS OF BLURRED VISION IN SLIGHTLY DIM LIGHTING "LIKE A LAYER OF OIL COVERED ON YOUR GLASSES." LENS REMAINS IMPLANTED. Manufactu…	-12.5/+1.0/084	OS	Physician	03/13/2019	2019
https://www.accessdata.fda.gov/scripts/cdrh/cfdocs/cfMAUDE/Detail.CFM?MDRFOI__ID=8511547&pc=QCB	2023826-2019-00600	2019-03-04	Malfunction	STAAR SURGICAL COMPANY	2019-04-12	QCB	IMPLANTABLE COLLAMER LENS (ICL)	Misfocusing; Device Dislodged or Dislocated	Blurred Vision	NA	Event Description: THE REPORTER INDICATED THE SURGEON IMPLANTED A 13.2MM VTICMO13.2 IMPLANTABLE COLLAMER LENS, -11.0/+4.0/090 (SPHERE/CYLINDER/AXIS), IN THE PATIENTS RIGHT EYE (OD), ON (B)(6) 2019. THE REPORTER INDICATED THERE WAS LENS ROTATION NOT ASSOCIATED TO A LOW VAULT AND THE PATIENT EXPERIENCED A REFRACTIVE SURPRISE. THE LENS REMAINS IMPLANTED. Manufacturer Narrative: THIS PRODUCT IS MANUF…	-11.0/+4.0/090	OD	Physician	03/16/2019	2019	27
https://www.accessdata.fda.gov/scripts/cdrh/cfdocs/cfMAUDE/Detail.CFM?MDRFOI__ID=8511615&pc=QCB	2023826-2019-00601	2019-03-04	Malfunction	STAAR SURGICAL COMPANY	2019-04-12	QCB	IMPLANTABLE COLLAMER LENS (ICL)	Misfocusing; Device Dislodged or Dislocated	Blurred Vision	NA	Event Description: THE REPORTER INDICATED THE SURGEON IMPLANTED A 13.2MM VTICMO13.2 IMPLANTABLE COLLAMER LENS, -10.0/+4.0/092 (SPHERE/CYLINDER/AXIS), IN THE PATIENTS LEFT EYE (OS), ON (B)(6) 2019. THE REPORTER INDICATED THERE WAS LENS ROTATION NOT ASSOCIATED TO A LOW VAULT AND THE PATIENT EXPERIENCED A REFRACTIVE SURPRISE. THE LENS REMAINS IMPLANTED. Manufacturer Narrative: THIS PRODUCT IS MANUFA…	-10.0/+4.0/092	OS	Physician	03/16/2019	2019	27
https://www.accessdata.fda.gov/scripts/cdrh/cfdocs/cfMAUDE/Detail.CFM?MDRFOI__ID=8519002&pc=QCB	2023826-2019-00613		Malfunction	STAAR SURGICAL COMPANY	2019-04-16 04:00:00	QCB	IMPLANTABLE COLLAMER LENS (ICL)	Misfocusing	Blurred Vision	N/A	Event Description: THE REPORTER INDICATED THE SURGEON IMPLANTED A 13.2MM VTICM5_13.2 IMPLANTABLE COLLAMER LENS, -11.5/+1.0/104 (SPHERE/CYLINDER/AXIS) INTO THE PATIENT'S RIGHT EYE (OD). THE SURGEON REPORTS AN UNEXPECTED RESIDUAL REFRACTION OF -1.25 CYL POSTOPERATIVELY. LENS REMAINS IMPLANTED. ATTEMPTS TO OBTAIN ADDITIONAL INFORMATION HAVE NOT BEEN SUCCESSFUL. Manufacturer Narrative: IMPLANT DATE: …	-11.5/+1.0/104	OD		03/22/2019	2019
https://www.accessdata.fda.gov/scripts/cdrh/cfdocs/cfMAUDE/Detail.CFM?MDRFOI__ID=8524100&pc=QCB	2023826-2019-00619	2018-09-05	Malfunction	STAAR SURGICAL COMPANY	2019-04-17	QCB	IMPLANTABLE COLLAMER LENS (ICL)	Misfocusing	Blurred Vision	N/A	Event Description: THE REPORTER INDICATED THAT A 13.2MM,VTICM5_13.2, -11.0/5.0/086 (SPHERE/CYLINDER/AXIS), IMPLANTABLE COLLAMER LENS WAS IMPLANTED INTO THE PATIENTS LEFT EYE (OS) ON (B)(6) 2018 AND REFRACTIVE SURPRISE HAS BEEN OBSERVED. THE REPORTER STATED THAT THE LENS REMIANS IMPLANTED WITH POOR VA (VISUAL ACUITY). PATIENT BCVA 1.0 WITH OVER CORRECTION +0.75-1.25X63. IF ADDITIONAL INFORMATION I…	-11.0/5.0/086	OS	Physician	03/20/2019	2019
https://www.accessdata.fda.gov/scripts/cdrh/cfdocs/cfMAUDE/Detail.CFM?MDRFOI__ID=8611967&pc=QCB	2023826-2019-00675	2019-04-03	Malfunction	STAAR SURGICAL COMPANY	2019-05-15	QCB	IMPLANTABLE COLLAMER LENS (ICL)	Misfocusing	Blurred Vision	N/A	Event Description: THE REPORTER INDICATED THAT A 13.2MM, VTICM5_13.2, -12.50/2.0/090 (SPHERE/CYLINDER/AXIS), IMPLANTABLE COLLAMER LENS WAS IMPLANTED INTO THE PATIENT'S RIGHT EYE (OD) ON (B)(6) 2019. REFRACTIVE SURPRISE WAS OBSERVED, THE LENS REMAINS IMPLANTED. THE DOCTOR STATES "THE PATIENT IS HAPPY." ADDITIONAL INFORMATION HAS BEEN REQUESTED BUT NONE HAS BEEN FORTHCOMING. IF ADDITIONAL INFORMATI…	-12.50/2.0/090	OD	Physician	04/16/2019	2019	20
https://www.accessdata.fda.gov/scripts/cdrh/cfdocs/cfMAUDE/Detail.CFM?MDRFOI__ID=8692892&pc=QCB	2023826-2019-01070	2017-10-19	Malfunction	STAAR SURGICAL COMPANY	2019-06-12	QCB	IMPLANTABLE COLLAMER LENS	Misfocusing	Blurred Vision	N/A	Event Description: THE REPORTER STATED THAT THE SURGEON IMPLANTED A 12.6MM VTICM5_12.6, -3.0/+0.5/077 (SPHERE/CYLINDER/AXIS) INTO THE PATIENT'S LEFT EYE (OS) ON (B)(6) 2017. THE SURGEON REPORTS REFRACTIVE SURPRISE. REPORTEDLY, LENS REMAINS IMPLANTED. Manufacturer Narrative: THIS PRODUCT IS MANUFACTURED IN THE U.S. BUT NOT MARKETED IN THE U.S. LENS WORK ORDER SEARCH: NO SIMILAR COMPLAINT TYPE EVEN…	-3.0/+0.5/077	OS	Physician	05/21/2019	2019	32
https://www.accessdata.fda.gov/scripts/cdrh/cfdocs/cfMAUDE/Detail.CFM?MDRFOI__ID=8708611&pc=QCB	2023826-2019-01090	2019-02-05 05:00:00	Injury	STAAR SURGICAL COMPANY	2019-06-18 04:00:00	QCB	IMPLANTABLE COLLAMER LENS (ICL)	Misfocusing; Inadequacy of Device Shape and/or Size	Blurred Vision	N/A	Event Description: THE REPORTER INDICATED THAT A 12.1MM, VTICM5_12.1MM, -1.00/1.0/032 (SPHERE/CYLINDER/AXIS), IMPLANTABLE COLLAMER LENS WAS IMPLANTED INTO THE PATIENTS RIGHT EYE (OD) ON (B)(6) 2019. LOW VAULT AND REFRACTIVE SURPRISE WAS OBSERVED. THE REPORTER STATED " THE PATIENT HAD A SMALL REFRACTIVE ERROR ON THE RIGHT EYE PRE-OP, BUT IT HAS BEEN WORSE AFTER ICL IMPLANT ". ADDITIONAL INFORMATIO…	-1.00/1.0/032	OD		05/20/2019	2019	33
https://www.accessdata.fda.gov/scripts/cdrh/cfdocs/cfMAUDE/Detail.CFM?MDRFOI__ID=8708784&pc=QCB	2023826-2019-01091	2019-01-15 05:00:00	Injury	STAAR SURGICAL COMPANY	2019-06-18 04:00:00	QCB	IMPLANTABLE COLLAMER LENS (ICL)	Misfocusing; Inadequacy of Device Shape and/or Size; Device Dislodged or Dislocated	Blurred Vision	N/A	Event Description: THE REPORTER INDICATED THAT A 12.1MM, VTICM5_12.1MM, -2.00/2.0/159 (SPHERE/CYLINDER/AXIS), IMPLANTABLE COLLAMER LENS WAS IMPLANTED INTO THE PATIENTS LEFT EYE (OS) ON (B)(6) 2019. LOW VAULT WITH ROTATION AND REFRACTIVE SURPRISE WAS OBSERVED. ADDITIONAL INFORMATION HAS BEEN REQUESTED BUT NONE HAS BEEN FORTHCOMING. IF ADDITIONAL INFORMATION IS RECEIVED A SUPPLEMENTAL MEDWATCH REPO…	-2.00/2.0/159	OS		05/20/2019	2019	33
https://www.accessdata.fda.gov/scripts/cdrh/cfdocs/cfMAUDE/Detail.CFM?MDRFOI__ID=8773867&pc=QCB	2023826-2019-01187	2019-03-22 04:00:00	Malfunction	STAAR SURGICAL COMPANY	2019-07-09 04:00:00	QCB	IMPLANTABLE COLLAMER LENS (ICL)	Misfocusing; Off-Label Use	Blurred Vision	N/A	Event Description: THE REPORTER INDICATED THAT A 13.2MM, VTICMO13.2, -15.5/1.0/144 (SPHERE/CYLINDER/AXIS), IMPLANTABLE COLLAMER LENS WAS IMPLANTED INTO THE PATIENTS RIGHT EYE (OD) IN (B)(6) 2019 AND REFRACTIVE SURPRISE WAS OBSERVED. PATIENT IS UNHAPPY WITH NEAR VISION, AWAITING ICL EXCHANGE FOR HYPEROPIC SURPRISE. ADDITIONAL INFORMATION HAS BEEN REQUESTED FOR THIS CASE. IF ADDITIONAL INFORMATION …	-15.5/1.0/144	OD		06/13/2019	2019	37
https://www.accessdata.fda.gov/scripts/cdrh/cfdocs/cfMAUDE/Detail.CFM?MDRFOI__ID=8795444&pc=QCB	2023826-2019-01242	2019-05-20	Malfunction	STAAR SURGICAL COMPANY	2019-07-16	QCB	IMPLANTABLE COLLAMER LENS (ICL)	Misfocusing	Blurred Vision	NA	Event Description: THE REPORTER INDICATED THAT THE SURGEON IMPLANTED A 12.6MM VTICMO12.6 IMPLANTABLE COLLAMER LENS, -17.0/+2.0/080 (SPHERE/CYLINDER/AXIS), INTO THE PATIENT'S LEFT EYE (OS) ON (B)(6) 2019. THE SURGEON REPORTS REFRACTIVE SURPRISE AND BLURRED VISION. REPORTEDLY, THE LENS REMAINS IMPLANTED. Manufacturer Narrative: THIS PRODUCT IS MANUFACTURED IN THE U.S. BUT NOT MARKETED IN THE U.S. N…	-17.0/+2.0/080	OS	Physician	06/21/2019	2019	33
https://www.accessdata.fda.gov/scripts/cdrh/cfdocs/cfMAUDE/Detail.CFM?MDRFOI__ID=8798875&pc=QCB	2023826-2019-01267	2019-06-17	Malfunction	STAAR SURGICAL COMPANY	2019-07-17	QCB	IMPLANTABLE COLLAMER LENS (ICL)	Misfocusing	Blurred Vision	N/A	Event Description: THE REPORTER INDICATED THAT A 13.2MM, VTICM5_13.2, -0.50/6.0/098 (SPHERE/CYLINDER/AXIS), IMPLANTABLE COLLAMER LENS WAS IMPLANTED INTO THE PATIENTS RIGHT EYE (OD) AND REFRACTIVE SURPRISE WAS OBSERVED. LENS REMAINS IMPLANTED. ADDITIONAL INFORMATION HAS BEEN REQUESTED BUT NONE HAS BEEN FORTHCOMING. IF ADDITIONAL INFORMATION IS RECEIVED A SUPPLEMENTAL MEDWATCH REPORT WILL BE SUBMIT…	-0.50/6.0/098	OD	Physician	06/19/2019	2019	23
https://www.accessdata.fda.gov/scripts/cdrh/cfdocs/cfMAUDE/Detail.CFM?MDRFOI__ID=8798976&pc=QCB	2023826-2019-01266	2019-06-17	Malfunction	STAAR SURGICAL COMPANY	2019-07-17	QCB	IMPLANTABLE COLLAMER LENS (ICL)	Misfocusing	Blurred Vision	N/A	Event Description: THE REPORTER INDICATED THAT A 13.2MM, VTICM5_13.2, -0.50/6.0/076 (SPHERE/CYLINDER/AXIS), IMPLANTABLE COLLAMER LENS WAS IMPLANTED INTO THE PATIENTS LEFT EYE (OS) AND REFRACTIVE SURPRISE WAS OBSERVED. LENS REMAINS IMPLANTED. ADDITIONAL INFORMATION HAS BEEN REQUESTED BUT NONE HAS BEEN FORTHCOMING. IF ADDITIONAL INFORMATION IS RECEIVED A SUPPLEMENTAL MEDWATCH REPORT WILL BE SUBMITT…	-0.50/6.0/076	OS	Physician	06/19/2019	2019	23
https://www.accessdata.fda.gov/scripts/cdrh/cfdocs/cfMAUDE/Detail.CFM?MDRFOI__ID=8813862&pc=QCB	2023826-2019-01290	2019-05-04	Malfunction	STAAR SURGICAL COMPANY	2019-07-22	QCB	IMPLANTABLE COLLAMER LENS (ICL)	Misfocusing	Blurred Vision	NA	Event Description: THE REPORTER INDICATED THAT THE SURGEON IMPLANTED A 13.2MM VTICMO13.2 IMPLANTABLE COLLAMER LENS, -17.5/+1.5/020 (SPHERE/CYLINDER/AXIS), INTO THE PATIENT'S LEFT EYE (OS) ON (B)(6) 2018. THE SURGEON REPORTS REFRACTIVE SURPRISE. THE CAUSE OF THE EVENT IS REPORTED AS UNKNOWN. REPORTEDLY, THE LENS REMAINS IMPLANTED. Manufacturer Narrative: THIS PRODUCT IS MANUFACTURED IN THE U.S. BU…	-17.5/+1.5/020	OS	Physician	07/02/2019	2019	39
https://www.accessdata.fda.gov/scripts/cdrh/cfdocs/cfMAUDE/Detail.CFM?MDRFOI__ID=8813865&pc=QCB	2023826-2019-01289	2019-05-04	Malfunction	STAAR SURGICAL COMPANY	2019-07-22	QCB	IMPLANTABLE COLLAMER LENS (ICL)	Misfocusing	Blurred Vision	NA	Event Description: THE REPORTER INDICATED THAT THE SURGEON IMPLANTED A 13.2MM VTICMO13.2 IMPLANTABLE COLLAMER LENS, -18.0/+2.0/139 (SPHERE/CYLINDER/AXIS), INTO THE PATIENT'S RIGHT EYE (OD) ON (B)(6) 2018. THE SURGEON REPORTS REFRACTIVE SURPRISE. THE CAUSE OF THE EVENT IS REPORTED AS UNKNOWN. REPORTEDLY, THE LENS REMAINS IMPLANTED. Manufacturer Narrative: THIS PRODUCT IS MANUFACTURED IN THE U.S. B…	-18.0/+2.0/139	OD	Physician	07/02/2019	2019	39
https://www.accessdata.fda.gov/scripts/cdrh/cfdocs/cfMAUDE/Detail.CFM?MDRFOI__ID=8852208&pc=QCB	2023826-2019-01323		Malfunction	STAAR SURGICAL COMPANY	2019-08-01	QCB	IMPLANTABLE COLLAMER LENS (ICL)	Misfocusing	Blurred Vision	NA	Event Description: THE REPORTER INDICATED THE SURGEON IMPLANTED A 13.2MM VTICMO13.2 IMPLANTABLE COLLAMER LENS, -15.00/+2.5/141 (SPHERE/CYLINDER/AXIS) IN THE PATIENT'S RIGHT EYE (OD). THE REPORTER INDICATED THE PATIENT EXPERIENCED A REFRACTIVE SURPRISE AND THE LENS REMAINS IMPLANTED. THE CAUSE OF THE EVENT WAS UNKNOWN. ADDITIONAL INFORMATION HAS BEEN REQUESTED BUT NONE HAS BEEN FORTHCOMING. IF ADD…	-15.00/+2.5/141	OD	Physician	07/02/2019	2019
https://www.accessdata.fda.gov/scripts/cdrh/cfdocs/cfMAUDE/Detail.CFM?MDRFOI__ID=8852214&pc=QCB	2023826-2019-01324		Malfunction	STAAR SURGICAL COMPANY	2019-08-01	QCB	IMPLANTABLE COLLAMER LENS (ICL)	Misfocusing	Blurred Vision	NA	Event Description: THE REPORTER INDICATED THE SURGEON IMPLANTED A 13.2MM VTICMO13.2 IMPLANTABLE COLLAMER LENS, -18.00/+3.5/079 (SPHERE/CYLINDER/AXIS) IN THE PATIENT'S LEFT EYE (OS). THE REPORTER INDICATED THE PATIENT EXPERIENCED A REFRACTIVE SURPRISE AND THE LENS REMAINS IMPLANTED. THE CAUSE OF THE EVENT WAS UNKNOWN. ADDITIONAL INFORMATION HAS BEEN REQUESTED BUT NONE HAS BEEN FORTHCOMING. IF ADDI…	-18.00/+3.5/079	OS	Physician	07/02/2019	2019
https://www.accessdata.fda.gov/scripts/cdrh/cfdocs/cfMAUDE/Detail.CFM?MDRFOI__ID=8871962&pc=QCB	2023826-2019-01395	2019-05-25 04:00:00	Injury	STAAR SURGICAL COMPANY	2019-08-07 04:00:00	QCB	IMPLANTABLE COLLAMER LENS (ICL)	Misfocusing	Blurred Vision	NA	Event Description: THE REPORTER INDICATED THE SURGEON IMPLANTED A 13.2MM VTICM5_13.2 IMPLANTABLE COLLAMER LENS, -13.0/+2.0/090 (SPHERE/CYLINDER/AXIS), IN THE PATIENTS RIGHT EYE (OD), ON (B)(6) 2019. THE PATIENT EXPERIENCED A REFRACTIVE SURPRISE AND THE LENS REMAINS IMPLANTED. THE REPORTER INDICATED THE CAUSE OF THE EVENT WAS UNKNOWN. Manufacturer Narrative: B5: THE LENS WAS EXPLANTED ON (B)(6) 20…	-13.0/+2.0/090	OD		07/08/2019	2019	34
https://www.accessdata.fda.gov/scripts/cdrh/cfdocs/cfMAUDE/Detail.CFM?MDRFOI__ID=8894318&pc=QCB	2023826-2019-01433		Injury	STAAR SURGICAL COMPANY	2019-08-14	QCB	IMPLANTABLE COLLAMER LENS (ICL)	Misfocusing	Blurred Vision	NA	Event Description: THE REPORTER INDICATED THAT THE SURGEON IMPLANTED A 12.6MM VTICMO12.6 IMPLANTABLE COLLAMER LENS, -17.5/+3.0/111 (SPHERE/CYLINDER/AXIS), INTO THE PATIENT'S LEFT EYE (OS). THE SURGEON REPORTS REFRACTIVE SURPRISE. LOSS OF BCVA IS ALSO REPORTED, HOWEVER THE PRE-OP BCVA IS LISTED AS "?" AND POST-OP IS "20/25 GLASSES." THE CAUSE OF THE EVENT IS REPORTED AS UNKNOWN. REPORTEDLY, THE LE…	-17.5/+3.0/111	OS	Physician	07/17/2019	2019
https://www.accessdata.fda.gov/scripts/cdrh/cfdocs/cfMAUDE/Detail.CFM?MDRFOI__ID=8966498&pc=QCB	2023826-2019-01648	2019-07-31 04:00:00	Malfunction	STAAR SURGICAL COMPANY	2019-09-05 04:00:00	QCB	IMPLANTABLE COLLAMER LENS	Misfocusing; Off-Label Use	Blurred Vision	N/A	Event Description: THE REPORTER STATED THAT THE SURGEON IMPLANTED A 13.2MM VTICM5_13.2, -0.5/+6.0/092 (SPHERE/CYLINDER/AXIS) INTO THE PATIENT'S LEFT EYE (OS) ON (B)(6) 2019. THE SURGEON REPORTS REFRACTIVE SURPRISE AND THAT UCVA HAS WORSENED FROM THE 1ST WEEK OF SURGERY. REPORTEDLY, LENS REMAINS IMPLANTED. Manufacturer Narrative: METHOD CODE 4110: NO ADDITIONAL SIMILAR COMPLAINT TYPE EVENT(S) WITH…	-0.5/+6.0/092	OS		08/09/2019	2019	21
https://www.accessdata.fda.gov/scripts/cdrh/cfdocs/cfMAUDE/Detail.CFM?MDRFOI__ID=9088369&pc=QCB	2023826-2019-01670	2019-07-03	Malfunction	STAAR SURGICAL COMPANY	2019-09-19	QCB	IMPLANTABLE COLLAMER LENS (ICL)	Misfocusing	Blurred Vision	N/A	Event Description: THE REPORTER INDICATED THAT A 12.1MM, VTICM5_12.1, -9.50/3.5/079 (SPHERE/CYLINDER/AXIS), IMPLANTABLE COLLAMER LENS WAS IMPLANTED INTO THE PATIENT'S RIGHT EYE (OD) ON (B)(6) 2019. REFRACTIVE SURPRISE WAS OBSERVED, THE LENS REMAINS IMPLANTED. ADDITIONAL INFORMATION HAS BEEN REQUESTED BUT NONE HAS BEEN FORTHCOMING. IF ADDITIONAL INFORMATION IS RECEIVED A SUPPLEMENTAL MEDWATCH REPO…	-9.50/3.5/079	OD	Physician	08/26/2019	2019	25
https://www.accessdata.fda.gov/scripts/cdrh/cfdocs/cfMAUDE/Detail.CFM?MDRFOI__ID=9136940&pc=QCB	2023826-2019-01809	2019-08-30	Malfunction	STAAR SURGICAL COMPANY	2019-09-30	QCB	IMPLANTABLE COLLAMER LENS	Misfocusing	Blurred Vision	N/A	Event Description: THE REPORTER STATED THAT THE SURGEON IMPLANTED A 13.2MM VTICM5_13.2, -3.5/+6.0/118 (SPHERE/CYLINDER/AXIS) INTO THE PATIENT'S RIGHT EYE (OD) ON (B)(6) 2019. THE SURGEON REPORTS REFRACTIVE SURPRISE. REPORTEDLY, THE LENS REMAINS IMPLANTED AND NO SURGICAL INTERVENTION WILL BE PERFORMED AS "PATIENT IS HAPPY." THE CAUSE OF THE EVENT IS REPORTED AS UNKNOWN. Manufacturer Narrative: WEI…	-3.5/+6.0/118	OD	Physician	09/09/2019	2019	47
https://www.accessdata.fda.gov/scripts/cdrh/cfdocs/cfMAUDE/Detail.CFM?MDRFOI__ID=9148352&pc=QCB	2023826-2019-01853		Malfunction	STAAR SURGICAL COMPANY	2019-10-02	QCB	IMPLANTABLE COLLAMER LENS (ICL)	Misfocusing	Blurred Vision	N/A	Event Description: THE REPORTER INDICATED THAT A PATIENT WITH POST LASIK ECTASIA WHO HE CROSS LINKED AND IMPLANTED 13.7MM, VTICMO13.7, -2.00/4.0/160 (SPHERE/CYLINDER/AXIS), IMPLANTABLE COLLAMER LENS INTO THE RIGHT EYE (OD) HAD AN EXCELLENT OUTCOME, BUT OVER THE PAST 2 YEARS HIS CORNEAL SHAPE HAS CHANGED SLIGHTLY AND HAS BECOME MORE MYOPIC. PATIENT HAS NO CATARACT AND HIS CORNEAL ENDOTHELIAL CELL …	-2.00/4.0/160	OD	Physician	08/29/2019	2019
https://www.accessdata.fda.gov/scripts/cdrh/cfdocs/cfMAUDE/Detail.CFM?MDRFOI__ID=9454032&pc=QCB	2023826-2019-02344	2019-09-30 04:00:00	Malfunction	STAAR SURGICAL COMPANY	2019-12-11 05:00:00	QCB	IMPLANTABLE COLLAMER LENS (ICL)	Misfocusing	Blurred Vision	N/A	Event Description: THE REPORTER INDICATED THAT THE SURGEON IMPLANTED A 12.6MM, VTICM5_12.6, -8.50/0.5/101 (SPHERE/CYLINDER/AXIS) IMPLANTABLE COLLAMER LENS INTO THE PATIENTS RIGHT EYE (OD) ON (B)(6) 2019. IT WAS REPORTED THAT THE PATIENT EXPERIENCED REFRACTIVE SURPRISE. LENS REMAINS IMPLANTED. IF ADDITIONAL INFORMATION IS RECEIVED A SUPPLEMENTAL MEDWATCH REPORT WILL BE SUBMITTED. Manufacturer Narr…	-8.50/0.5/101	OD		11/13/2019	2019	22
https://www.accessdata.fda.gov/scripts/cdrh/cfdocs/cfMAUDE/Detail.CFM?MDRFOI__ID=9469760&pc=QCB	2023826-2019-02383		Malfunction	STAAR SURGICAL COMPANY	2019-12-13	QCB	IMPLANTABLE COLLAMER LENS (ICL)	Misfocusing	Blurred Vision	NA	Event Description: THE REPORTER INDICATED THE SURGEON IMPLANTED A 12.6MM VTICMO12.6 IMPLANTABLE COLLAMER LENS, -15.00/+1.5/065 (SPHERE/CYLINDER/AXIS) IN THE PATIENTS LEFT EYE (OS) ON (B)(6) 2019. THE REPORTER INDICATED THE PATIENT EXPERIENCED A REFRACTIVE SURPRISE. THE LENS REMAINS IMPLANTED. ADDITIONAL INFORMATION HAS BEEN REQUESTED BUT NONE HAS BEEN FORTHCOMING. IF ADDITIONAL INFORMATION IS REC…	-15.00/+1.5/065	OS	Physician	11/13/2019	2019
https://www.accessdata.fda.gov/scripts/cdrh/cfdocs/cfMAUDE/Detail.CFM?MDRFOI__ID=9476270&pc=QCB	2023826-2019-02391	2019-11-05 05:00:00	Malfunction	STAAR SURGICAL COMPANY	2019-12-16 05:00:00	QCB	IMPLANTABLE COLLAMER LENS (ICL)	Misfocusing	Blurred Vision	NA	Event Description: THE REPORTER INDICATED THAT THE SURGEON IMPLANTED A 13.2MM VTICMO13.2 IMPLANTABLE COLLAMER LENS, -2.5/+3.5/104 (SPHERE/CYLINDER/AXIS), INTO THE PATIENT'S RIGHT EYE (OD) ON (B)(6)2019. THE SURGEON REPORTS REFRACTIVE SURPRISE. REPORTEDLY, THE LENS REMAINS IMPLANTED. Manufacturer Narrative: ADDITIONAL INFORMATION: B5 - POSTOPERATIVE REPORT INDICATED PATIENT'S IOP IS STABLE AND REP…	-2.5/+3.5/104	OD		11/21/2019	2019	26
https://www.accessdata.fda.gov/scripts/cdrh/cfdocs/cfMAUDE/Detail.CFM?MDRFOI__ID=9476271&pc=QCB	2023826-2019-02390	2019-11-05 05:00:00	Malfunction	STAAR SURGICAL COMPANY	2019-12-16 05:00:00	QCB	IMPLANTABLE COLLAMER LENS (ICL)	Misfocusing	Blurred Vision	NA	Event Description: THE REPORTER INDICATED THAT THE SURGEON IMPLANTED A 13.2MM VTICMO13.2 IMPLANTABLE COLLAMER LENS, -2.5/+4.5/079 (SPHERE/CYLINDER/AXIS), INTO THE PATIENT'S LEFT EYE (OS) ON (B)(6)2019. THE SURGEON REPORTS REFRACTIVE SURPRISE. REPORTEDLY, THE LENS REMAINS IMPLANTED. Manufacturer Narrative: ADDITIONAL INFORMATION: B5 - POSTOPERATIVE REPORT STATED PATIENT'S IOP IS STABLE AND REPORTS…	-2.5/+4.5/079	OS		11/21/2019	2019	26
https://www.accessdata.fda.gov/scripts/cdrh/cfdocs/cfMAUDE/Detail.CFM?MDRFOI__ID=9476283&pc=QCB	2023826-2019-02389	2017-01-21 05:00:00	Malfunction	STAAR SURGICAL COMPANY	2019-12-16 05:00:00	QCB	IMPLANTABLE COLLAMER LENS (ICL)	Misfocusing	Blurred Vision	NA	Event Description: THE REPORTER INDICATED THAT THE SURGEON IMPLANTED A 12.1MM VTICMO12.1 IMPLANTABLE COLLAMER LENS, -13.5/+2.0/104 (SPHERE/CYLINDER/AXIS), INTO THE PATIENT'S RIGHT EYE (OD). THE SURGEON REPORTS "HYPEROPIC SHIFT 2D." Manufacturer Narrative: B5-ADDITIONAL INFORMATION: THE REPORTER STATES THE "PATIENT HAS REFRACTIVE CHANGES 'SIGNIFICANT' OVER TIME AFTER 3 YEARS OF ICL IMPLANTATION." …	-13.5/+2.0/104	OD		11/20/2019	2019	29
https://www.accessdata.fda.gov/scripts/cdrh/cfdocs/cfMAUDE/Detail.CFM?MDRFOI__ID=9491791&pc=QCB	2023826-2019-02421	2020-06-16 04:00:00	Malfunction	STAAR SURGICAL COMPANY	2019-12-18 05:00:00	QCB	IMPLANTABLE COLLAMER LENS (ICL)	Misfocusing	Blurred Vision	N/A	Event Description: THE REPORTER INDICATED THAT A 13.2MM, VTICM5_13.2, -9.50/3.0/071 (SPHERE/CYLINDER/AXIS) IMPLANTABLE COLLAMER LENS WAS IMPLANTED INTO THE PATIENTS RIGHT EYE (OD) AND THE PATIENT EXPERIENCED REFRACTIVE SURPRISE. ADDITIONAL INFORMATION HAS BEEN REQUESTED BUT NONE HAS BEEN FORTHCOMING. IF ADDITIONAL INFORMATION IS RECEIVED A SUPPLEMENTAL MEDWATCH REPORT WILL BE SUBMITTED. Manufactu…	-9.50/3.0/071	OD		11/20/2019	2019	25
https://www.accessdata.fda.gov/scripts/cdrh/cfdocs/cfMAUDE/Detail.CFM?MDRFOI__ID=9516576&pc=QCB	2023826-2019-02450	2019-12-02	Malfunction	STAAR SURGICAL COMPANY	2019-12-24	QCB	IMPLANTABLE COLLAMER LENS (ICL)	Misfocusing	Blurred Vision	N/A	Event Description: THE REPORTER INDICATED THAT A 13.2MM, VTICM5_13.2, -4.00/6.0/156 (SPHERE/CYLINDER/AXIS), IMPLANTABLE COLLAMER LENS WAS IMPLANTED INTO THE PATIENT'S RIGHT EYE (OD) ON (B)(6) 2019. REFRACTIVE SURPRISE WAS OBSERVED, THE LENS REMAINS IMPLANTED. CAUSE OF THE EVENT IS REPORTED AS UNKNOWN. ADDITIONAL INFORMATION HAS BEEN REQUESTED BUT NONE HAS BEEN FORTHCOMING. IF ADDITIONAL INFORMATI…	-4.00/6.0/156	OD	Physician	12/04/2019	2019	30
https://www.accessdata.fda.gov/scripts/cdrh/cfdocs/cfMAUDE/Detail.CFM?MDRFOI__ID=9536347&pc=QCB	2023826-2019-02508		Malfunction	STAAR SURGICAL COMPANY	2019-12-31	QCB	IMPLANTABLE COLLAMER LENS (ICL)	Misfocusing; Inadequacy of Device Shape and/or Size	Blurred Vision	NA	Event Description: THE REPORTER INDICATED THE SURGEON IMPLANTED A 13.2MM VTICM5_13.2 IMPLANTABLE COLLAMER LENS, -9.50/+6.0/025 (SPHERE/CYLINDER/AXIS), IN THE PATIENTS LEFT EYE (OS) ON (B)(6) 2019. THE LENS WAS REPORTED AS HAVING EXCESSIVE VAULTING AND THE PATIENT EXPERIENCED A REFRACTIVE SURPRISE. THE LENS REMAINS IMPLANTED. THE CAUSE OF THE EVENT WAS UNKNOWN. Manufacturer Narrative: THIS PRODUCT…	-9.50/+6.0/025	OS	Physician	12/11/2019	2019
https://www.accessdata.fda.gov/scripts/cdrh/cfdocs/cfMAUDE/Detail.CFM?MDRFOI__ID=9588359&pc=QCB	2023826-2020-00120	2019-11-04	Malfunction	STAAR SURGICAL COMPANY	2020-01-14	QCB	IMPLANTABLE COLLAMER LENS (ICL)	Misfocusing	Blurred Vision	NA	Event Description: THE REPORTER INDICATED THAT A 13.2MM, VTICMO13.2, -14.50/5.00/95 (SPHERE/CYLINDER/AXIS), IMPLANTABLE COLLAMER LENS WAS IMPLANTED INTO THE PATIENTS RIGHT EYE (OD) ON (B)(6) 2019. ON (B)(6) 2019 REFRACTIVE SURPRISE WAS NOTED. LENS REMAINS IMPLANTED, PATIENTS CURRENT CONDITION IS GOOD, BCVA 20/20. IF ADDITIONAL INFORMATION IS RECEIVED A SUPPLEMENTAL MEDWATCH REPORT WILL BE SUBMITT…	-14.50/5.00/95	OD	Physician	12/16/2019	2019	21
https://www.accessdata.fda.gov/scripts/cdrh/cfdocs/cfMAUDE/Detail.CFM?MDRFOI__ID=9614033&pc=QCB	2023826-2020-00138	2019-07-16	Malfunction	STAAR SURGICAL COMPANY	2020-01-21	QCB	IMPLANTABLE COLLAMER LENS (ICL)	Misfocusing; Patient-Device Incompatibility; Device Dislodged or Dislocated	Blurred Vision	NA	Event Description: THE REPORTER INDICATED THE SURGEON IMPLANTED A 13.7MM VTICM5_13.7 IMPLANTABLE COLLAMER LENS, -2.5/+6.0/080 (SPHERE/CYLINDER/AXIS), IN THE PATIENT'S RIGHT EYE (OD) ON (B)(6) 2018. THE LENS WAS REPORTED AS HAVING ROTATION NOT ASSOCIATED TO A LOW VAULT AND THE PATIENT EXPERIENCED A REFRACTIVE SURPRISE. AT POST-OP VISIT ON (B)(6) 2020, THE REFRACTION WAS STABLE. THE PATIENT WAS PRE…	-2.5/+6.0/080	OD	Physician	12/23/2019	2019	24
https://www.accessdata.fda.gov/scripts/cdrh/cfdocs/cfMAUDE/Detail.CFM?MDRFOI__ID=9614063&pc=QCB	2023826-2020-00139	2019-07-16	Malfunction	STAAR SURGICAL COMPANY	2020-01-21	QCB	IMPLANTABLE COLLAMER LENS (ICL)	Misfocusing; Patient-Device Incompatibility; Device Dislodged or Dislocated	Blurred Vision	NA	Event Description: THE REPORTER INDICATED THE SURGEON IMPLANTED A 13.2MM VTICM5_13.2 IMPLANTABLE COLLAMER LENS, -1.5/+6.0/074 (SPHERE/CYLINDER/AXIS), IN THE PATIENT'S LEFT EYE (OS) ON (B)(6) 2019. THE LENS WAS REPORTED AS HAVING ROTATION NOT ASSOCIATED TO A LOW VAULT AND THE PATIENT EXPERIENCED A REFRACTIVE SURPRISE. AT POST-OP VISIT ON (B)(6) 2020, THE REFRACTION WAS STABLE. THE PATIENT WAS PRES…	-1.5/+6.0/074	OS	Physician	12/23/2019	2019	24
https://www.accessdata.fda.gov/scripts/cdrh/cfdocs/cfMAUDE/Detail.CFM?MDRFOI__ID=9689160&pc=QCB	2023826-2020-00282	2018-02-09	Malfunction	STAAR SURGICAL COMPANY	2020-02-10	QCB	IMPLANTABLE COLLAMER LENS (ICL)	Misfocusing	Blurred Vision	N/A	Event Description: THE REPORTER INDICATED THAT A 12.6MM, VTICM5_12.6, -5.00/2.0/115 (SPHERE/CYLINDER/AXIS), IMPLANTABLE COLLAMER LENS WAS IMPLANTED INTO THE PATIENT'S RIGHT EYE (OD) ON (B)(6) 2018. REFRACTIVE SURPRISE WAS OBSERVED, THE LENS REMAINS IMPLANTED. REPORTEDLY, PATIENT "ENDED UP WITH SMALL MINUS ON ONE EYE AND SMALL PLUS ON OTHER EYE. WE WILL CHANGE RIGHT LENS AND HOPE THAT THE BALANCE …	-5.00/2.0/115	OD	Physician	01/16/2020	2020	40
https://www.accessdata.fda.gov/scripts/cdrh/cfdocs/cfMAUDE/Detail.CFM?MDRFOI__ID=9706694&pc=QCB	2023826-2020-00306	2020-01-13	Malfunction	STAAR SURGICAL COMPANY	2020-02-13	QCB	IMPLANTABLE COLLAMER LENS (ICL)	Misfocusing; Inadequacy of Device Shape and/or Size	Blurred Vision	N/A	Event Description: THE REPORTER INDICATED THAT THE SURGEON IMPLANTED A 12.6MM VTICM5_12.6, -5.00/2.0/084 (SPHERE/CYLINDER/AXIS) , IMPLANTABLE COLLAMER LENS INTO THE PATIENT'S LEFT EYE (OS) ON (B)(6) 2020. "VERY LOW VAULT AND REFRACTIVE SURPRISE" WERE OBSERVED. LENS REMAINS IMPLANTED. ADDITIONAL INFORMATION HAS BEEN REQUESTED BUT NONE HAS BEEN FORTHCOMING. IF ADDITIONAL INFORMATION IS RECEIVED A S…	-5.00/2.0/084	OS	Physician	01/24/2020	2020	28
https://www.accessdata.fda.gov/scripts/cdrh/cfdocs/cfMAUDE/Detail.CFM?MDRFOI__ID=9706704&pc=QCB	2023826-2020-00305	2020-01-13	Malfunction	STAAR SURGICAL COMPANY	2020-02-13	QCB	IMPLANTABLE COLLAMER LENS (ICL)	Misfocusing; Inadequacy of Device Shape and/or Size	Blurred Vision	N/A	Event Description: THE REPORTER INDICATED THAT THE SURGEON IMPLANTED A 12.6MM VTICM5_12.6, -5.50/2.5/087 (SPHERE/CYLINDER/AXIS) , IMPLANTABLE COLLAMER LENS INTO THE PATIENT'S RIGHT EYE (OD) ON (B)(6) 2020. "VERY LOW VAULT AND REFRACTIVE SURPRISE" WERE OBSERVED. LENS REMAINS IMPLANTED. ADDITIONAL INFORMATION HAS BEEN REQUESTED BUT NONE HAS BEEN FORTHCOMING. IF ADDITIONAL INFORMATION IS RECEIVED A …	-5.50/2.5/087	OD	Physician	01/24/2020	2020	28
https://www.accessdata.fda.gov/scripts/cdrh/cfdocs/cfMAUDE/Detail.CFM?MDRFOI__ID=9721915&pc=QCB	2023826-2020-00308	2020-01-22	Malfunction	STAAR SURGICAL COMPANY	2020-02-18	QCB	IMPLANTABLE COLLAMER LENS	Misfocusing	Blurred Vision	N/A	Event Description: THE REPORTER STATED THAT THE SURGEON IMPLANTED A 12.6MM VTICM5_12.6, -10.5/+4.0/092 (SPHERE/CYLINDER/AXIS) INTO THE PATIENT'S RIGHT EYE (OD) ON (B)(6) 2020. THE SURGEON REPORTS REFRACTIVE SURPRISE. REPORTEDLY, LENS REMAINS IMPLANTED. Manufacturer Narrative: THIS PRODUCT IS MANUFACTURED IN THE U.S. BUT NOT MARKETED IN THE U.S. NO SIMILAR COMPLAINT TYPE EVENTS REPORTED FOR UNITS …	-10.5/+4.0/092	OD	Physician	01/23/2020	2020	25
https://www.accessdata.fda.gov/scripts/cdrh/cfdocs/cfMAUDE/Detail.CFM?MDRFOI__ID=9721913&pc=QCB	2023826-2020-00309	2020-01-22 05:00:00	Injury	STAAR SURGICAL COMPANY	2020-02-18 05:00:00	QCB	IMPLANTABLE COLLAMER LENS	Misfocusing; Appropriate Term/Code Not Available	Blurred Vision	N/A	Event Description: THE REPORTER STATED THAT THE SURGEON IMPLANTED A 12.6MM VTICM5_12.6, -11.5/+4.0/090 (SPHERE/CYLINDER/AXIS) INTO THE PATIENT'S LEFT EYE (OS) ON (B)(6) 2020. THE SURGEON REPORTS REFRACTIVE SURPRISE. REPORTEDLY, LENS REMAINS IMPLANTED. Manufacturer Narrative: ADDITIONAL INFORMATION:: B1- ADVERSE EVENT. B2- REQUIRES INTERVENTION TO PREVENT PERMANENT IMPAIRMENT/DAMAGE . B5-THE REPOR…	-11.5/+4.0/090	OS		01/23/2020	2020	25
https://www.accessdata.fda.gov/scripts/cdrh/cfdocs/cfMAUDE/Detail.CFM?MDRFOI__ID=9759568&pc=QCB	2023826-2020-00325	2019-07-05 04:00:00	Malfunction	STAAR SURGICAL COMPANY	2020-02-26 05:00:00	QCB	IMPLANTABLE COLLAMER LENS (ICL)	Misfocusing	Blurred Vision	NA	Event Description: THE REPORTER INDICATED THE SURGEON IMPLANTED A 13.7MM VTICMO13.7 IMPLANTABLE COLLAMER LENS, -17.00/+6.0/180 (SPHERE/CYLINDER/AXIS), IN THE PATIENTS RIGHT EYE (OD). THE PATIENT EXPERIENCED A REFRACTIVE SURPRISE AND THE LENS REMAINS IMPLANTED. ADDITIONAL INFORMATION HAS BEEN REQUESTED BUT NONE HAS BEEN FORTHCOMING. IF ADDITIONAL INFORMATION IS RECEIVED, A SUPPLEMENTAL MEDWATCH WI…	-17.00/+6.0/180	OD		01/31/2020	2020
https://www.accessdata.fda.gov/scripts/cdrh/cfdocs/cfMAUDE/Detail.CFM?MDRFOI__ID=9850132&pc=QCB	2023826-2020-00571	2020-02-19 05:00:00	Injury	STAAR SURGICAL COMPANY	2020-03-18 04:00:00	QCB	IMPLANTABLE COLLAMER LENS (ICL)	Misfocusing; Adverse Event Without Identified Device or Use Problem	Blurred Vision	NA	Event Description: THE REPORTER INDICATED THE SURGEON IMPLANTED A 13.2MM VTICM5_13.2 IMPLANTABLE COLLAMER LENS, -11.0/+4.0/073 (SPHERE/CYLINDER/AXIS), IN THE PATIENTS RIGHT EYE (OD). THE PATIENT EXPERIENCED A REFRACTIVE SURPRISE AND REMAINS IMPLANTED. THE CAUSE OF THE EVENT WAS UNKNOWN. ADDITIONAL INFORMATION HAS BEEN REQUESTED BUT NONE HAS BEEN FORTHCOMING. IF ADDITIONAL INFORMATION IS RECEIVED,…	-11.0/+4.0/073	OD		02/21/2020	2020	52
https://www.accessdata.fda.gov/scripts/cdrh/cfdocs/cfMAUDE/Detail.CFM?MDRFOI__ID=9960153&pc=QCB	2023826-2020-00853		Malfunction	STAAR SURGICAL COMPANY	2020-04-14	QCB	IMPLANTABLE COLLAMER LENS	Misfocusing; Device Dislodged or Dislocated	Blurred Vision	N/A	Event Description: THE REPORTER STATED THAT THE SURGEON IMPLANTED A 13.2MM VTICM5_13.2, -12.5/+3.5/104 (SPHERE/CYLINDER/AXIS) INTO THE PATIENT'S RIGHT EYE (OD) ON (B)(6) 2019. THE SURGEON REPORTS REFRACTIVE SURPRISE AND POSSIBLE LENS ROTATION. REPORTEDLY, LENS REMAINS IMPLANTED. ATTEMPTS TO OBTAIN ADDITIONAL INFORMATION HAVE NOT BEEN SUCCESSFUL. Manufacturer Narrative: THIS PRODUCT IS MANUFACTURE…	-12.5/+3.5/104	OD	Physician	03/16/2020	2020
https://www.accessdata.fda.gov/scripts/cdrh/cfdocs/cfMAUDE/Detail.CFM?MDRFOI__ID=9960163&pc=QCB	2023826-2020-00854		Malfunction	STAAR SURGICAL COMPANY	2020-04-14	QCB	IMPLANTABLE COLLAMER LENS	Misfocusing; Device Dislodged or Dislocated	Blurred Vision	N/A	Event Description: THE REPORTER STATED THAT THE SURGEON IMPLANTED A 13.2MM VTICM5_13.2, -12.0/+3.0/094 (SPHERE/CYLINDER/AXIS) INTO THE PATIENT'S LEFT EYE (OS) ON (B)(6) 2019. THE SURGEON REPORTS REFRACTIVE SURPRISE AND POSSIBLE LENS ROTATION. REPORTEDLY, LENS REMAINS IMPLANTED. ATTEMPTS TO OBTAIN ADDITIONAL INFORMATION HAVE NOT BEEN SUCCESSFUL. Manufacturer Narrative: THIS PRODUCT IS MANUFACTURED…	-12.0/+3.0/094	OS	Physician	03/16/2020	2020
https://www.accessdata.fda.gov/scripts/cdrh/cfdocs/cfMAUDE/Detail.CFM?MDRFOI__ID=10025646&pc=QCB	2023826-2020-01007	2020-04-06	Malfunction	STAAR SURGICAL COMPANY	2020-05-05	QCB	IMPLANTABLE COLLAMER LENS	Misfocusing	Blurred Vision	N/A	Event Description: THE REPORTER STATED THAT THE SURGEON IMPLANTED A 12.6MM VTICM5_12.6, -10.0/+2.5/088 (SPHERE/CYLINDER/AXIS) INTO THE PATIENT'S LEFT EYE (OS) ON (B)(6) 2020. THE SURGEON REPORTS REFRACTIVE SURPRISE. REPORTEDLY, LENS REMAINS IMPLANTED. Manufacturer Narrative: THIS PRODUCT IS MANUFACTURED IN THE U.S. BUT NOT MARKETED IN THE U.S. NO SIMILAR COMPLAINT TYPE EVENTS REPORTED FOR UNITS W…	-10.0/+2.5/088	OS	Physician	04/08/2020	2020	29
https://www.accessdata.fda.gov/scripts/cdrh/cfdocs/cfMAUDE/Detail.CFM?MDRFOI__ID=10025656&pc=QCB	2023826-2020-01006	2020-04-06	Malfunction	STAAR SURGICAL COMPANY	2020-05-05	QCB	IMPLANTABLE COLLAMER LENS	Misfocusing	Blurred Vision	N/A	Event Description: THE REPORTER STATED THAT THE SURGEON IMPLANTED A 12.6MM VTICM5_12.6, -10.0/+2.5/093 (SPHERE/CYLINDER/AXIS) INTO THE PATIENT'S RIGHT EYE (OD) ON (B)(6) 2020. THE SURGEON REPORTS REFRACTIVE SURPRISE. REPORTEDLY, LENS REMAINS IMPLANTED. Manufacturer Narrative: THIS PRODUCT IS MANUFACTURED IN THE U.S. BUT NOT MARKETED IN THE U.S. NO SIMILAR COMPLAINT TYPE EVENTS REPORTED FOR UNITS …	-10.0/+2.5/093	OD	Physician	04/08/2020	2020	29
https://www.accessdata.fda.gov/scripts/cdrh/cfdocs/cfMAUDE/Detail.CFM?MDRFOI__ID=10130964&pc=QCB	2023826-2020-01217	2020-03-27 04:00:00	Malfunction	STAAR SURGICAL COMPANY	2020-06-08 04:00:00	QCB	IMPLANTABLE COLLAMER LENS (ICL)	Misfocusing	Blurred Vision	NA	Event Description: THE REPORTER INDICATED THAT A 12.1MM, VTICMO12.1, -1700/3.50/89 (SPHERE/CYLINDER/AXIS), IMPLANTABLE COLLAMER LENS, WAS IMPLANTED INTO THE PATIENTS LEFT EYE (OS) ON (B)(6) 2020. THE PATIENT EXPERIENCED REFRACTIVE SURPRISE, LENS REMAINS IMPLANTED. IF ADDITIONAL INFORMATION IS RECEIVED A SUPPLEMENTAL MEDWATCH REPORT WILL BE SUBMITTED. Manufacturer Narrative: THE REPORTER STATED HI…	-17.00/3.50/89	OS		04/14/2020	2020	35
https://www.accessdata.fda.gov/scripts/cdrh/cfdocs/cfMAUDE/Detail.CFM?MDRFOI__ID=10131012&pc=QCB	2023826-2020-01218	2020-03-27 04:00:00	Injury	STAAR SURGICAL COMPANY	2020-06-08 04:00:00	QCB	IMPLANTABLE COLLAMER LENS (ICL)	Misfocusing	Blurred Vision	NA	Event Description: THE REPORTER INDICATED THAT A 12.1MM, VTICMO12.1, -18.00/3.00/77 (SPHERE/CYLINDER/AXIS), IMPLANTABLE COLLAMER LENS, WAS IMPLANTED INTO THE PATIENTS RIGHT EYE (OD) ON (B)(6) 2020. THE PATIENT EXPERIENCED REFRACTIVE SURPRISE, LENS REMAINS IMPLANTED. IF ADDITIONAL INFORMATION IS RECEIVED A SUPPLEMENTAL MEDWATCH REPORT WILL BE SUBMITTED. Manufacturer Narrative: THE REPORTER STATED …	-18.00/3.00/77	OD		04/14/2020	2020	35
https://www.accessdata.fda.gov/scripts/cdrh/cfdocs/cfMAUDE/Detail.CFM?MDRFOI__ID=10162715&pc=QCB	2023826-2020-01294	2020-01-21 05:00:00	Injury	STAAR SURGICAL COMPANY	2020-06-17 04:00:00	QCB	IMPLANTABLE COLLAMER LENS (ICL)	Misfocusing; No Apparent Adverse Event	Blurred Vision	NA	Event Description: THE REPORTER REPORTED REFRACTIVE CHANGE OVERTIME IN THE LEFT EYE (OS). ADDITIONAL INFORMATION HAS BEEN REQUESTED BUT NONE HAS BEEN FORTHCOMING. IF ADDITIONAL INFORMATION IS RECEIVED A SUPPLEMENTAL MEDWATCH REPORT WILL BE SUBMITTED. Manufacturer Narrative: ADDITIONAL INFORMATION: H3- DEVICE EVALUATION: LENS WAS RETURNED IN A MICRO CENTRIFUGE VIAL WITH MOISTURE AND RESIDUE ON THE…	-17.00/0.50/125	OS		05/18/2020	2020	48
https://www.accessdata.fda.gov/scripts/cdrh/cfdocs/cfMAUDE/Detail.CFM?MDRFOI__ID=10222177&pc=QCB	2023826-2020-01420	2020-06-08	Malfunction	STAAR SURGICAL COMPANY	2020-07-01	QCB	IMPLANTABLE COLLAMER LENS	Misfocusing; Improper or Incorrect Procedure or Method	Blurred Vision	N/A	Event Description: THE REPORTER STATED THAT THE SURGEON IMPLANTED A 13.2MM VTICM5_13.2, -14.0/+5.0/109 (SPHERE/CYLINDER/AXIS) INTO THE PATIENT'S RIGHT EYE (OD) ON (B)(6) 2019. THE SURGEON REPORTS REFRACTIVE SURPRISE. REPORTEDLY, LENS REMAINS IMPLANTED. THE CAUSE OF THE EVENT IS REPORTED AS USER ERROR. Manufacturer Narrative: THIS PRODUCT IS MANUFACTURED IN THE U.S. BUT NOT MARKETED IN THE U.S. (B…	-14.0/+5.0/109	OD	Physician	06/09/2020	2020	34
https://www.accessdata.fda.gov/scripts/cdrh/cfdocs/cfMAUDE/Detail.CFM?MDRFOI__ID=10222170&pc=QCB	2023826-2020-01418	2020-06-05 04:00:00	Malfunction	STAAR SURGICAL COMPANY	2020-07-01 04:00:00	QCB	IMPLANTABLE COLLAMER LENS	Misfocusing	Blurred Vision	N/A	Event Description: THE REPORTER STATED THAT THE SURGEON IMPLANTED A 13.2MM VTICM5_13.2, -10.5/+1.5/091 (SPHERE/CYLINDER/AXIS) INTO THE PATIENT'S RIGHT EYE (OD) ON (B)(6) 2020. THE SURGEON REPORTS REFRACTIVE SURPRISE. REPORTEDLY, LENS REMAINS IMPLANTED. Manufacturer Narrative: ADDITIONAL INFORMATION: B5- "THE PROBLEM WAS RESOLVED." SHOULD BE ADDED TO PREVIOUS MDR CLAIM# (B)(4). Manufacturer Narrat…	-10.5/+1.5/091	OD		06/08/2020	2020	32
https://www.accessdata.fda.gov/scripts/cdrh/cfdocs/cfMAUDE/Detail.CFM?MDRFOI__ID=10254180&pc=QCB	2023826-2020-01444	2020-03-05 05:00:00	Malfunction	STAAR SURGICAL COMPANY	2020-07-09 04:00:00	QCB	IMPLANTABLE COLLAMER LENS (ICL)	Misfocusing	Blurred Vision	P030016	Event Description: THE REPORTER INDICATED THAT THE SURGEON IMPLANTED A 12.6MM TMICL12.6 LENS, -12.5/+4.0/090 (SPHERE/CYLINDER/AXIS) INTO THE PATIENT'S RIGHT (OD) EYE ON (B)(6) 2020. THE SURGEON REPORTS REFRACTIVE SURPRISE. REPORTEDLY, THE LENS REMAINS IMPLANTED. THE CAUSE OF THE EVENT IS REPORTED AS UNKNOWN. Manufacturer Narrative: CORRECTED DATA: B1- CORRECTED TO PRODUCT PROBLEM-MALFUNCTION. H1-…	-12.5/+4.0/090	OD		06/16/2020	2020	37
https://www.accessdata.fda.gov/scripts/cdrh/cfdocs/cfMAUDE/Detail.CFM?MDRFOI__ID=10332955&pc=QCB	2023826-2020-01568		Injury	STAAR SURGICAL COMPANY	2020-07-28 04:00:00	QCB	IMPLANTABLE COLLAMER LENS (ICL)	Misfocusing	Blurred Vision	N/A	Event Description: THE REPORTER INDICATED THAT A 12.1MM, VTICM5_12.1, -12.50/2.5/089 (SPHERE/CYLINDER/AXIS), IMPLANTABLE COLLAMER LENS WAS IMPLANTED INTO THE PATIENT'S RIGHT EYE (OD) ON (B)(6) 2020. REFRACTIVE SURPRISE WAS OBSERVED, THE LENS REMAINS IMPLANTED. ADDITIONAL INFORMATION HAS BEEN REQUESTED BUT NONE HAS BEEN FORTHCOMING. IF ADDITIONAL INFORMATION IS RECEIVED A SUPPLEMENTAL MEDWATCH REP…	-12.50/2.5/089	OD		07/05/2020	2020
https://www.accessdata.fda.gov/scripts/cdrh/cfdocs/cfMAUDE/Detail.CFM?MDRFOI__ID=10356745&pc=QCB	2023826-2020-01608	2020-01-19 05:00:00	Injury	STAAR SURGICAL COMPANY	2020-08-03 04:00:00	QCB	IMPLANTABLE COLLAMER LENS (ICL)	Misfocusing; Device Dislodged or Dislocated	Blurred Vision	NA	Event Description: THE REPORTER INDICATED THE SURGEON IMPLANTED A 13.2MM VTICM5_13.2 IMPLANTABLE COLLAMER LENS, -04.00/+4.0/065 (SPHERE/CYLINDER/AXIS), IN THE PATIENTS LEFT EYE (OS), ON (B)(6) 2020. THE PATIENT EXPERIENCED A REFRACTIVE SURPRISE AND BLURRED VISION. THE LENS REMAINED IMPLANTED. THE CAUSE OF THE EVENT WAS UNKNOWN. Manufacturer Narrative: B5: THE REPORTER INDICATED A 20 DEGREE MISALI…	-04.00/+4.0/065	OS		07/08/2020	2020	31
https://www.accessdata.fda.gov/scripts/cdrh/cfdocs/cfMAUDE/Detail.CFM?MDRFOI__ID=10403862&pc=QCB	2023826-2020-01730	2020-07-15	Malfunction	STAAR SURGICAL COMPANY	2020-08-13	QCB	IMPLANTABLE COLLAMER LENS	Misfocusing	Blurred Vision	N/A	Event Description: THE REPORTER STATED THAT THE SURGEON IMPLANTED A 12.6MM VTICM5_12.6, -13.0/+4.5/099 (SPHERE/CYLINDER/AXIS) INTO THE PATIENT'S RIGHT EYE (OD) ON (B)(6) 2020. THE SURGEON REPORTS REFRACTIVE SURPRISE. REPORTEDLY, LENS REMAINS IMPLANTED. Manufacturer Narrative: WEIGHT, ETHNICITY, RACE: UNK. PMA/510K: THIS PRODUCT IS MANUFACTURED IN THE U.S. BUT NOT MARKETED IN THE U.S. LENS WORK OR…	-13.0/+4.5/099	OD	Physician	07/16/2020	2020	26
https://www.accessdata.fda.gov/scripts/cdrh/cfdocs/cfMAUDE/Detail.CFM?MDRFOI__ID=10508720&pc=QCB	2023826-2020-02061	2020-07-23	Malfunction	STAAR SURGICAL COMPANY	2020-09-09	QCB	IMPLANTABLE COLLAMER LENS (ICL)	Misfocusing	Blurred Vision	NA#S-P#NA	Event Description: THE REPORTER INDICATED THAT A 13.2MM, VTICM5_13.2, -12.50/2.00/94 (SPHERE/CYLINDER/AXIS), IMPLANTABLE COLLAMER LENS WAS IMPLANTED INTO THE PATIENTS RIGHT EYE (OD) ON (B)(6) 2020. THE PATIENT EXPERIENCED REFRACTIVE SURPRISE, LENS REMAINS IMPLANTED. IF ADDITIONAL INFORMATION IS RECEIVED A SUPPLEMENTAL MEDWATCH REPORT WILL BE SUBMITTED. Manufacturer Narrative: WEIGHT: UNK. ETHNICI…	-12.50/2.00/94	OD	Physician	08/14/2020	2020	29
https://www.accessdata.fda.gov/scripts/cdrh/cfdocs/cfMAUDE/Detail.CFM?MDRFOI__ID=10508814&pc=QCB	2023826-2020-02063	2020-07-23	Malfunction	STAAR SURGICAL COMPANY	2020-09-09	QCB	IMPLANTABLE COLLAMER LENS (ICL)	Misfocusing	Blurred Vision	NA#S-P#NA	Event Description: THE REPORTER INDICATED THAT A 13.2MM, VTICM5_13.2, -11.50/2.00/61 (SPHERE/CYLINDER/AXIS), IMPLANTABLE COLLAMER LENS WAS IMPLANTED INTO THE PATIENTS LEFT EYE (OS) ON (B)(6) 2020. THE PATIENT EXPERIENCED REFRACTIVE SURPRISE, LENS REMAINS IMPLANTED. IF ADDITIONAL INFORMATION IS RECEIVED A SUPPLEMENTAL MEDWATCH REPORT WILL BE SUBMITTED. Manufacturer Narrative: THIS PRODUCT IS NOT M…	-11.50/2.00/61	OS	Physician	08/14/2020	2020	29
https://www.accessdata.fda.gov/scripts/cdrh/cfdocs/cfMAUDE/Detail.CFM?MDRFOI__ID=10508931&pc=QCB	2023826-2020-02065	2018-03-06	Injury	STAAR SURGICAL COMPANY	2020-09-09	QCB	IMPLANTABLE COLLAMER LENS (ICL)	Misfocusing	Blurred Vision	NA#S-P#NA	Event Description: THE REPORTER INDICATED THAT A 13.7MM, VTICM5_13.7, -12.50/4.5/135 (SPHERE/CYLINDER/AXIS), IMPLANTABLE COLLAMER LENS WAS IMPLANTED INTO THE PATIENTS RIGHT EYE (OD) ON (B)(6) 2018. ON (B)(6) 2018 THE LENS WAS REPOSITIONED DUE TO REFRACTIVE SURPRISE. IT WAS REPORTED THAT THE PROBLEM RESOLVED, PATIENT IS HAPPY. USER ERROR WAS REPORTED TO BE THE CAUSE OF THIS EVENT. Manufacturer Nar…	-12.50/4.5/135	OD	Physician	08/13/2020	2020	31
https://www.accessdata.fda.gov/scripts/cdrh/cfdocs/cfMAUDE/Detail.CFM?MDRFOI__ID=10524412&pc=QCB	2023826-2020-02039	2020-08-03 04:00:00	Injury	STAAR SURGICAL COMPANY	2020-09-11 04:00:00	QCB	IMPLANTABLE COLLAMER LENS (ICL)	Misfocusing; No Apparent Adverse Event	Blurred Vision	N/A#S-P#N/A	Event Description: THE REPORTER INDICATED THAT A 12.6MM, VTICMO12.6, -15.5/2.5/098 (SPHERE/CYLINDER/AXIS), IMPLANTABLE COLLAMER LENS WAS IMPLANTED INTO THE PATIENT'S RIGHT EYE (OD) ON (B)(6) 2017. REFRACTIVE CHANGE OVER TIME WAS REPORTED. THE LENS REMAINS IMPLANTED. Manufacturer Narrative: H3 - DEVICE EVALUATION: LENS WAS RETURNED IN A MICRO-CENTRIFUGE VIAL WITH MOISTURE ON THE LENS. VISUAL INSPE…	-15.5/2.5/098	OD		08/14/2020	2020	26
https://www.accessdata.fda.gov/scripts/cdrh/cfdocs/cfMAUDE/Detail.CFM?MDRFOI__ID=10551357&pc=QCB	2023826-2020-02122	2020-08-10 04:00:00	Injury	STAAR SURGICAL COMPANY	2020-09-17 04:00:00	QCB	IMPLANTABLE COLLAMER LENS	Misfocusing; Device Dislodged or Dislocated	Blurred Vision	N/A	Event Description: THE REPORTER STATED THAT THE SURGEON IMPLANTED A 12.6MM VTICM5_12.6, -12.5/+3.0/086 (SPHERE/CYLINDER/AXIS) INTO THE PATIENT'S RIGHT EYE (OD) ON (B)(6) 2020. THE SURGEON REPORTS LENS ROTATION AND REFRACTIVE SURPRISE. ON (B)(6) 2020 THE LENS WAS REPOSITIONED WHICH DID NOT RESOLVE THE PROBLEM. THE SURGEON STATES THE LENS WAS REPOSITIONED 3 TIMES AND THE LENS ROTATED AT THE SAME AN…	-12.5/+3.0/086	OD		08/19/2020	2020	36
https://www.accessdata.fda.gov/scripts/cdrh/cfdocs/cfMAUDE/Detail.CFM?MDRFOI__ID=10556954&pc=QCB	2023826-2020-02154	2020-07-17 04:00:00	Malfunction	STAAR SURGICAL COMPANY	2020-09-18 04:00:00	QCB	IMPLANTABLE COLLAMER LENS (ICL)	Misfocusing	Blurred Vision	NA	Event Description: THE REPORTER INDICATED THAT A 13.2MM, VTICM5_13.2, -11.50/1.50/73 (SPHERE/CYLINDER/AXIS), IMPLANTABLE COLLAMER LENS WAS IMPLANTED INTO THE PATIENTS LEFT EYE (OS) ON (B)(6) 2020. REFRACTIVE SURPRISE WAS OBSERVED. LENS REMAINS IMPLANTED, NO FURTHER INTERVENTION HAS BEEN PERFORMED, VISION REMAINS THE SAME. IF ADDITIONAL INFORMATION IS RECEIVED A SUPPLEMENTAL MEDWATCH REPORT WILL B…	-11.50/1.50/73	OS		08/19/2020	2020	22
[truncated: 13,549 more rows]
