# Supplementary material for: Adverse events associated with Implantable Collamer Lens: insights from the FDA MAUDE database
Source: Front Med (Lausanne). 2025 Jul 21;12:1613060. doi: 10.3389/fmed.2025.1613060 (PMC12319018; doi:10.3389/fmed.2025.1613060)
Supplement: Supplementary file 10 [file Table_9.XLSX]

## Sheet: IOP Issue-1
Web Address	Report Number	Event Date	Event Type	Manufacturer	Date Received	Product Code	Brand Name	Device Problem	Patient Problem	PMA/PMN Number	Exemption Number	Number of Events	Event Text	Management	Outcomes
https://www.accessdata.fda.gov/scripts/cdrh/cfdocs/cfMAUDE/Detail.CFM?MDRFOI__ID=12755755&pc=MTA	2023826-2021-04210	2021-07-04	Injury	STAAR SURGICAL COMPANY	2021-11-06	MTA	IMPLANTABLE COLLAMER LENS (ICL)	Misfocusing; Off-Label Use	Blurred Vision; Eye Pain	N/A	NA	1	Event Description: THE REPORTER INDICATED THE SURGEON IMPLANTED A 12.1MM VICMO12.1 IMPLANTABLE COLLAMER LENS, DIOPTER -6.0 INTO THE PATIENT'S LEFT EYE (OS) ON (B)(6) 2021. ON (B)(6) 2021 THE LENS WAS EXPLANTED DUE TO REFRACTIVE SURPRISE AND BLURRED VISION. THE PROBLEM WAS RESOLVED. THE CAUSE OF THE EVENT IS REPORTED AS UNKNOWN. REPORTEDLY, "THE PATIENT HAS A VAGUE OF THE LEFT EYE BRINGING A VERY …	Lens Extraction	Resolved
https://www.accessdata.fda.gov/scripts/cdrh/cfdocs/cfMAUDE/Detail.CFM?MDRFOI__ID=6054105&pc=MTA	2023826-2016-01523	2016-10-10	Injury	STAAR SURGICAL COMPANY	2016-10-25	MTA	ICL (IMPLANTABLE COLLAMER LENS)	Inadequacy of Device Shape and/or Size	Cataract, Induced; Corneal Edema; Hyphema; Intraocular Pressure Increased; No Code Available	P030016	NA	1	Event Description: THE REPORTER STATED THAT THE SURGEON IMPLANTED A 12.1MM MICL12.1 LENS, -3.50 DIOPTER, IN THE PATIENT'S RIGHT EYE ON (B)(6) 2016. THE LENS WAS EXPLANTED ON THE SAME DAY DUE TO EXCESSIVE VAULTING, RESULTING IN ELEVATED INTRAOCULAR PRESSURE (IOP), SHALLOW ANTERIOR CHAMBER, CORNEAL EDEMA, HYPHEMA, AND DEVELOPMENT OF A CATARACT._x000D_ Manufacturer Narrative: DEVICE EVALUATION: PROD…	Lens Extraction	Unknown
https://www.accessdata.fda.gov/scripts/cdrh/cfdocs/cfMAUDE/Detail.CFM?MDRFOI__ID=5218705&pc=MTA	2023826-2015-01478	2015-08-10	Injury	STAAR SURGICAL COMPANY	2015-11-11	MTA	ICL (IMPLANTABLE COLLAMER LENS)	Device Operates Differently Than Expected; Appropriate Term/Code Not Available	Cataract, Induced; Intraocular Pressure Increased; Pupillary Block; No Code Available	NA	NA	1	Event Description: THE REPORTER INDICATED THE SURGEON IMPLANTED A 12.6MM VICMO12.6 IMPLANTABLE COLLAMER LENS, -07.50 DIOPTER, IN THE PATIENT'S LEFT EYE (OS) ON (B)(6) 2015. THE LENS WAS EXPLANTED ON (B)(6) 2015 DUE TO THE DEVELOPMENT OF AN ANTERIOR SUBCAPSULAR OPACITY, PUPIL BLOCK, ELEVATED INTRAOCULAR PRESSURE AND ANGLE CLOSURE. THE LENS WAS NOT EXCHANGED FOR ANOTHER LENS. Manufacturer Narrative…	Lens Extraction	Unknown
https://www.accessdata.fda.gov/scripts/cdrh/cfdocs/cfMAUDE/Detail.CFM?MDRFOI__ID=5816274&pc=MTA	2023826-2016-00974	2016-06-13	Injury	STAAR SURGICAL COMPANY	2016-07-22	MTA	ICL (IMPLANTABLE COLLAMER LENS)	Inadequacy of Device Shape and/or Size; Appropriate Term/Code Not Available	Cataract; Cataract, Induced; Corneal Edema; Intraocular Pressure Increased; Blurred Vision; Loss of Vision; No Code Available	N/A	NA	1	Event Description: THE REPORTER INDICATED THAT THE SURGEON IMPLANTED A 13.2MM VICMO13.2 IMPLANTABLE COLLAMER LENS, -14.0 DIOPTER, IN THE PATIENT'S RIGHT EYE (OD) ON (B)(6) 2016. THE LENS WAS EXPLANTED ON (B)(6) 2016 DUE TO AN EXCESSIVE VAULT, LENS OPACITY (CATARACT), AND LOSS OF VISION. THE PATIENT EXPERIENCED AN ELEVATED IOP, SIGNIFICANT REDUCTION OF IRIDO-CORNEAL ANGLES, ANGLE CLOSURE, BLURRED …	Lens Extraction	Not_Resolved
https://www.accessdata.fda.gov/scripts/cdrh/cfdocs/cfMAUDE/Detail.CFM?MDRFOI__ID=11435324&pc=MTA	MW5099834	2019-06-03	Malfunction	STAAR SURGICAL COMPANY	2021-03-05	MTA	STAAR SURGICAL ICL IMPLANT	Insufficient Information	Cataract; Foreign Body Sensation in Eye; Itching Sensation; Blurred Vision; Excessive Tear Production; Eye Pain	NA	NA	1	Event Description: I HAD ICL SURGERY ON (B)(6) 2009. IN 2011, I STARTED TO HAVE ISSUES WITH MY VISION. I HAD TO START WEARING EYE GLASSES TO DRIVE AND THEN ENDED UP WITH -1.25 VISION TO THIS DATE. IN (B)(6) 2019 I STARTED TO HAVE AN ITCHING/POKING FEELING IN MY RIGHT EYE. MY EYE CONTINUED TO WATER AND ITCH AS IF SOMETHING WAS POKING ME. I VISITED SEVERAL EYE DOCTORS, INCLUDING MY SURGEON WHO HAD …	Unknown	Unknown
https://www.accessdata.fda.gov/scripts/cdrh/cfdocs/cfMAUDE/Detail.CFM?MDRFOI__ID=11620596&pc=MTA	2023826-2021-00861	NA	Injury	STAAR SURGICAL COMPANY	2021-04-06 04:00:00	MTA	IMPLANTABLE COLLAMER LENS (ICL)	Misfocusing	Cataract; Foreign Body Sensation in Eye; Itching Sensation; Blurred Vision; Excessive Tear Production; Eye Pain	P030016	NA	1	Event Description: THE REPORTER INDICATED THAT THE SURGEON IMPLANTED A 12.1MM MICL12.1 IMPLANTABLE COLLAMER LENS, -10.0 DIOPTER, INTO THE PATIENT'S RIGHT (OD) EYE ON (B)(6) 2009. REPORTEDLY, THE PATIENT DEVELOPED LENS OPACITY CORTICAL, REFRACTIVE CHANGE OVER TIME, THE PATIENT HAD TO WEAR GLASSES TO DRIVE, A WATERY/ITCHING/POKING FEELING AND PAIN IN THE EYE. BLURRY VISION ALSO REPORTED. THE SURGEO…	Unknown	Unknown
https://www.accessdata.fda.gov/scripts/cdrh/cfdocs/cfMAUDE/Detail.CFM?MDRFOI__ID=9814249&pc=MTA	2023826-2020-00475	2020-01-17	Injury	STAAR SURGICAL COMPANY	2020-03-10	MTA	IMPLANTABLE COLLAMER LENS (ICL)	Misfocusing; Adverse Event Without Identified Device or Use Problem	Cataract; Headache; Blurred Vision; Visual Disturbances	NA	NA	1	Event Description: THE REPORTER INDICATED THE SURGEON IMPLANTED A 12.6MM VICM5_12.6 IMPLANTABLE COLLAMER LENS, -09.50, IN THE PATIENTS RIGHT EYE (OD), ON (B)(6) 2020. THE PATIENT EXPERIENCED A REFRACTIVE SURPRISE, BLURRED VISION, LOSS OF BEST CORRECTED VISUAL ACUITY AND LENS OPACITY (POSTERIOR SUBCAPSULAR) WAS NOTED. THE PATIENT IS SENSITIVE TO BRIGHT LIGHT AND HEADACHE WHEN READING. THE LENS REM…	Lens Exchange + Secondary Operation	Resolved
https://www.accessdata.fda.gov/scripts/cdrh/cfdocs/cfMAUDE/Detail.CFM?MDRFOI__ID=9107373&pc=MTA	2023826-2019-01752	2019-05-30	Injury	STAAR SURGICAL COMPANY	2019-09-23	MTA	IMPLANTABLE COLLAMER LENS (ICL)	Off-Label Use; Adverse Event Without Identified Device or Use Problem	Cataract; Inflammation; Pain; Visual Disturbances; No Code Available	NA	NA	1	Event Description: THE REPORTER INDICATED THE SURGEON IMPLANTED A 12.1MM VICMO12.1 IMPLANTABLE COLLAMER LENS -18.00 DIOPTER, IN THE PATIENTS LEFT EYE (OS) ON (B)(6) 2019. A COUPLE OF HOURS AFTER THE INITIAL SURGERY, THE PATIENT EXPERIENCED PAIN AND A NEGATIVE EFFECT ON HER VISION. A CATARACT HAD DEVELOPED AND THE LENS WAS EXPLANTED. THE CATARACT WAS REMOVED AND A MONOFOCAL LENS WAS IMPLANTED ON (…	Lens Exchange + Secondary Operation	Unknown
https://www.accessdata.fda.gov/scripts/cdrh/cfdocs/cfMAUDE/Detail.CFM?MDRFOI__ID=12516827&pc=MTA	2023826-2021-03729	2018-06-20	Injury	STAAR SURGICAL COMPANY	2021-09-22	MTA	IMPLANTABLE COLLAMER LENS (ICL)	Off-Label Use; Adverse Event Without Identified Device or Use Problem	Cataract; Intraocular Pressure Increased	NA	NA	1	Event Description: THE REPORTER INDICATED THAT A 12.1MM, VICM5_12.1, -12.00 DIOPTER, IMPLANTABLE COLLAMER LENS WAS IMPLANTED INTO THE PATIENTS LEFT EYE (OS) ON (B)(6) 2018. ON (B)(6) 2021 THE LENS WAS EXPLANTED DUE TO ELEVATED IOP AND CATARACT. PHACO-EMULSIFICATION (CATARACT SURGERY) AND IOL IMPLANTATION WAS PERFORMED. PROBLEM RESOLVED. CAUSE OF EVENT WAS UNKNOWN. Manufacturer Narrative: H6- MEDI…	Lens Exchange + Secondary Operation	Resolved
https://www.accessdata.fda.gov/scripts/cdrh/cfdocs/cfMAUDE/Detail.CFM?MDRFOI__ID=11098622&pc=MTA	2023826-2020-03254	2020-12-04	Injury	STAAR SURGICAL COMPANY	2020-12-30	MTA	IMPLANTABLE COLLAMER LENS (ICL)	Misfocusing; Inadequacy of Device Shape and/or Size; Improper or Incorrect Procedure or Method	Cataract; Intraocular Pressure Increased; Blurred Vision	N/A	NA	1	Event Description: THE REPORTER INDICATED THAT THE SURGEON IMPLANTED A 13.2MM VICM5_13.2 IMPLANTABLE COLLAMER LENS, -3.5 DIOPTER INTO THE PATIENT'S RIGHT EYE (OD) ON (B)(6) 2020. THE SURGEON REPORTS EXCESSIVE VAULT, ELEVATED IOP, AND PUNTIFORM OPACITY IN THE POSTERIOR CAPSULE. THE CAUSE OF THE EVENT IS REPORTED AS USER ERROR: NON RECOMMENDED OVD AND EXCESSIVE USE OF OVD DUE TO A NON TOTAL DILATIO…	Lens Retention + Secondary Operation	Resolved
https://www.accessdata.fda.gov/scripts/cdrh/cfdocs/cfMAUDE/Detail.CFM?MDRFOI__ID=10669737&pc=MTA	2023826-2020-02329	2020-08-21	Injury	STAAR SURGICAL COMPANY	2020-10-13	MTA	IMPLANTABLE COLLAMER LENS (ICL)	Misfocusing; Inadequacy of Device Shape and/or Size; Optical Problem	Cataract; Intraocular Pressure Increased; Iritis; Blurred Vision; Visual Disturbances; Halo; Appropriate Clinical Signs, Symptoms, Conditions Term / Code Not Available	P030016	NA	1	Event Description: THE REPORTER INDICATED THE SURGEON IMPLANTED A 12.6MM MICL12.6 IMPLANTABLE COLLAMER LENS, -12.50 DIOPTER, IN THE PATIENTS RIGHT EYE (OD) ON (B)(6) 2020. THE LENS WAS EXPLANTED ON (B)(6) 2020 DUE TO INTRAOCULAR PRESSURE SPIKE (NOT CONTROLLABLE WITH DROPS) AND LENS WAS TOO LARGE, WHICH WAS CAUSING THE LENS TO BOW TOWARDS THE IRIS, INCREASING THE PRESSURE. THERE IS NO LENS IN THE …	Lens Exchange + Secondary Operation	Resolved
https://www.accessdata.fda.gov/scripts/cdrh/cfdocs/cfMAUDE/Detail.CFM?MDRFOI__ID=10669743&pc=MTA	2023826-2020-02328	2020-08-21	Injury	STAAR SURGICAL COMPANY	2020-10-13	MTA	IMPLANTABLE COLLAMER LENS (ICL)	Misfocusing; Inadequacy of Device Shape and/or Size; Optical Problem	Cataract; Intraocular Pressure Increased; Iritis; Blurred Vision; Visual Disturbances; Halo; Appropriate Clinical Signs, Symptoms, Conditions Term / Code Not Available	P030016	NA	1	Event Description: THE REPORTER INDICATED THE SURGEON IMPLANTED A 12.6MM MICL12.6 IMPLANTABLE COLLAMER LENS, -12.50 DIOPTER, IN THE PATIENTS LEFT EYE (OS) ON (B)(6) 2020. THE LENS WAS EXPLANTED ON (B)(6) 2020 DUE TO INTRAOCULAR PRESSURE SPIKE (NOT CONTROLLABLE WITH DROPS) AND LENS WAS TOO LARGE, WHICH WAS CAUSING THE LENS TO BOW TOWARDS THE IRIS, INCREASING THE PRESSURE . THERE IS NO LENS IN THE …	Lens Exchange + Secondary Operation	Resolved
https://www.accessdata.fda.gov/scripts/cdrh/cfdocs/cfMAUDE/Detail.CFM?MDRFOI__ID=7155887&pc=MTA	2023826-2017-01982	2017-09-12	Injury	STAAR SURGICAL COMPANY	2017-12-29	MTA	IMPLANTABLE COLLAMER LENS (ICL)	Device Operates Differently Than Expected; Adverse Event Without Identified Device or Use Problem	Cataract; Intraocular Pressure Increased; No Code Available	NA	NA	1	Event Description: THE REPORTER INDICATED THAT THE SURGEON IMPLANTED A 12.5MM ICM125V4, IMPLANTABLE COLLAMER LENS, -18.0 DIOPTER, ON (B)(6) 2015 IN THE PATIENT'S RIGHT EYE (OD). LENS OPACITY (ASCO) WAS OBSERVED ON (B)(6) 2017,ELEVATED INTRAOCULAR PRESSURE AND REFRACTIVE CHANGE OVERTIME DUE TO CATARACT WAS ALSO NOTICED. THE LENS WAS EXPLANTED ON (B)(6) 2017, PHACO-EMULSIFICATION (CATARACT SURGERY)…	Lens Exchange + Secondary Operation	Resolved
https://www.accessdata.fda.gov/scripts/cdrh/cfdocs/cfMAUDE/Detail.CFM?MDRFOI__ID=8772247&pc=MTA	2023826-2019-01176	2019-06-08	Injury	STAAR SURGICAL COMPANY	2019-07-09	MTA	IMPLANTABLE COLLAMER LENS (ICL)	Material Opacification; Inadequacy of Device Shape and/or Size; Adverse Event Without Identified Device or Use Problem	Cataract; Intraocular Pressure Increased; No Code Available	P030016	NA	1	Event Description: THE REPORTER INDICATED THAT A 13.2MM, MICL13.2, -8.0 DIOPTER, IMPLANTABLE COLLAMER LENS WAS IMPLANTED INTO THE PATIENT'S RIGHT EYE (OD) ON (B)(6) 2019. "DUE TO FLOPPY IRIS AND HIGH PRESSURE RESULTING IN ANGLE CLOSURE", THE LENS WAS REMOVED ON (B)(6) 2019. ADDITIONAL INFORMATION HAS BEEN REQUESTED BUT NONE HAS BEEN FORTHCOMING. IF ADDITIONAL INFORMATION IS RECEIVED A SUPPLEMENTA…	Lens Extraction	Not_Resolved
https://www.accessdata.fda.gov/scripts/cdrh/cfdocs/cfMAUDE/Detail.CFM?MDRFOI__ID=6859975&pc=MTA	2023826-2017-01422	2017-08-10	Injury	STAAR SURGICAL COMPANY	2017-09-12	MTA	IMPLANTABLE COLLAMER LENS (ICL)	Inadequacy of Device Shape and/or Size	Cataract; Intraocular Pressure Increased; Pupillary Block; No Code Available	P030016	NA	1	Event Description: THE REPORTER INDICATED THAT THE SURGEON IMPLANTED A MICL13.2, -12.0 DIOPTER, IMPLANTABLE COLLAMER LENS IN THE PATIENT'S RIGHT EYE (OD) ON (B)(6) 2017. ON (B)(6) 2017, THE LENS WAS EXPLANTED DUE TO EXCESSIVE VAULTING, (PUPILLARY BLOCK) ELEVATED IOP, NARROWING OF THE ANGLE, ANGLE CLOSURE, SHALLOWING OF THE ACD, ANTERIOR LENS OPACITY, WATER VACUOLES, AND FIXED DILATED PUPIL. THE L…	Lens Extraction + Secondary Operation	Unknown
https://www.accessdata.fda.gov/scripts/cdrh/cfdocs/cfMAUDE/Detail.CFM?MDRFOI__ID=8233814&pc=MTA	2023826-2019-00072	2018-07-05	Injury	STAAR SURGICAL COMPANY	2019-01-10	MTA	IMPLANTABLE COLLAMER LENS (ICL)	Inadequacy of Device Shape and/or Size; Patient-Device Incompatibility; Device Dislodged or Dislocated; Adverse Event Without Identified Device or Use Problem; Optical Problem	Cataract; Intraocular Pressure Increased; Visual Disturbances; Halo; No Code Available	P030016	NA	1	Event Description: THE REPORTER INDICATED THE SURGEON IMPLANTED A 13.2MM MICL13.2 IMPLANTABLE COLLAMER LENS, -11.5 DIOPTER, IN THE PATIENTS RIGHT EYE (OD) ON (B)(6) 2018. THE LENS WAS EXPLANTED ON (B)(6) 2018 DUE TO PROBLEMS WITH PRESSURE. ADDITIONAL INFORMATION HAS BEEN REQUESTED BUT NONE HAS BEEN FORTHCOMING. IF ADDITIONAL INFORMATION IS RECEIVED, A SUPPLEMENTAL MEDWATCH WILL BE SUBMITTED. Manu…	Lens Extraction	Unknown
https://www.accessdata.fda.gov/scripts/cdrh/cfdocs/cfMAUDE/Detail.CFM?MDRFOI__ID=8233815&pc=MTA	2023826-2019-00071	2018-07-18	Injury	STAAR SURGICAL COMPANY	2019-01-10	MTA	IMPLANTABLE COLLAMER LENS (ICL)	Inadequacy of Device Shape and/or Size; Patient-Device Incompatibility; Device Dislodged or Dislocated; Adverse Event Without Identified Device or Use Problem; Optical Problem	Cataract; Intraocular Pressure Increased; Visual Disturbances; Halo; No Code Available	P030016	NA	1	Event Description: THE REPORTER INDICATED THE SURGEON IMPLANTED A 13.7MM MICL13.7 IMPLANTABLE COLLAMER LENS, -11.5 DIOPTER, IN THE PATIENTS LEFT EYE (OS) ON (B)(6) 2018. THE LENS WAS EXPLANTED ON (B)(6) 2018 DUE TO PROBLEMS WITH PRESSURE. ADDITIONAL INFORMATION HAS BEEN REQUESTED BUT NONE HAS BEEN FORTHCOMING. IF ADDITIONAL INFORMATION IS RECEIVED, A SUPPLEMENTAL MEDWATCH WILL BE SUBMITTED. Manuf…	Lens Extraction + Secondary Operation	Unknown
https://www.accessdata.fda.gov/scripts/cdrh/cfdocs/cfMAUDE/Detail.CFM?MDRFOI__ID=6024717&pc=MTA	2023826-2016-01448	NA	Injury	STAAR SURGICAL COMPANY	2016-10-12	MTA	ICL (IMPLANTABLE COLLAMER LENS)	Inadequacy of Device Shape and/or Size; Appropriate Term/Code Not Available	Cataract; Intraocular Pressure, Delayed, Uncontrolled; Pain; Blurred Vision; No Code Available	P030016	NA	1	Event Description: THE REPORTER STATED THE SURGEON IMPLANTED A 13.2MM MICL13.2 IMPLANTABLE COLLAMER LENS, -10.0 DIOPTER, IN THE PATIENT'S EYE. THE LENS WAS EXPLANTED DUE TO PRESSURE AND PAIN FOR PATIENT. ADDITIONAL INFORMATION HAS BEEN REQUESTED BUT NONE HAS BEEN FORTHCOMING. IF ADDITIONAL INFORMATION IS RECEIVED, A SUPPLEMENTAL MEDWATCH REPORT WILL BE SUBMITTED. Manufacturer Narrative: ADDITIONA…	Lens Extraction	Unknown
https://www.accessdata.fda.gov/scripts/cdrh/cfdocs/cfMAUDE/Detail.CFM?MDRFOI__ID=6298841&pc=MTA	2023826-2017-00208	NA	Injury	STAAR SURGICAL COMPANY	2017-02-02	MTA	ICL (IMPLANTABLE COLLAMER LENS)	Adverse Event Without Identified Device or Use Problem	Conjunctivitis; Glaucoma; Inflammation; Intraocular Pressure Increased	P030016	NA	1	Event Description: THE PATIENT REPORTED THE SURGEON IMPLANTED A 12.6MM MICL12.6 IMPLANTABLE COLLAMER LENS, -9.5 DIOPTER, IN HIS RIGHT EYE (OD). THE PATIENT REPORTED WAS PRESCRIBED ORAL MEDICATIONS/EYE DROPS FOR AT LEAST 3 CONSECUTIVE MONTHS DUE TO THE INSIDE OF HIS EYE WAS INFLAMED. ALSO WAS PRESCRIBED EYE DROPS FOR 3 CONSECUTIVE MONTHS FOR HIGH PRESSURE OR GLAUCOMA INSIDE THE EYE. THE LENS WAS I…	Lens Retention	Unknown
https://www.accessdata.fda.gov/scripts/cdrh/cfdocs/cfMAUDE/Detail.CFM?MDRFOI__ID=6298876&pc=MTA	2023826-2017-00209	NA	Injury	STAAR SURGICAL COMPANY	2017-02-02	MTA	ICL (IMPLANTABLE COLLAMER LENS)	Adverse Event Without Identified Device or Use Problem	Conjunctivitis; Glaucoma; Inflammation; Intraocular Pressure Increased	P030016	NA	1	Event Description: THE PATIENT REPORTED THE SURGEON IMPLANTED A 12.6MM MICL12.6 IMPLANTABLE COLLAMER LENS, -9.0 DIOPTER, IN HIS LEFT EYE (OS). THE PATIENT REPORTED WAS PRESCRIBED ORAL MEDICATIONS/EYE DROPS FOR AT LEAST 3 CONSECUTIVE MONTHS DUE TO THE INSIDE OF HIS EYE WAS INFLAMED. ALSO WAS PRESCRIBED EYE DROPS FOR 3 CONSECUTIVE MONTHS FOR HIGH PRESSURE OR GLAUCOMA INSIDE THE EYE. THE LENS WAS IM…	Lens Retention	Unknown
https://www.accessdata.fda.gov/scripts/cdrh/cfdocs/cfMAUDE/Detail.CFM?MDRFOI__ID=8159605&pc=MTA	2023826-2018-01833	2018-11-07	Injury	STAAR SURGICAL COMPANY	2018-12-13	MTA	IMPLANTABLE COLLAMER LENS (ICL)	Misfocusing; Inadequacy of Device Shape and/or Size	Corneal Decompensation; Corneal Edema; Inflammation; Intraocular Pressure Increased; Pain; Blurred Vision; No Code Available	P030016	NA	1	Event Description: THE REPORTER INDICATED THAT A 13.2MM MICL 13.2, -7.0 DIOPTER, IMPLANTABLE COLLAMER LENS WAS IMPLANTED INTO THE PATIENTS RIGHT EYE (OD) ON (B)(6) 2018. EXCESSIVE VAULT, LEADING TO CORNEAL DECOMPENSATION, UNCONTROLLED IOP, NARROWING OF THE ANGLES, CORNEAL EDEMA AND SHALLOWING OF THE ACD WAS OBSERVED. PAIN AND BLURRY VISION WAS REPORTED AS ADDITIONAL SYMPTOMS. ADDITIONAL SURGICAL …	Lens Extraction + Secondary Operation	Resolved
https://www.accessdata.fda.gov/scripts/cdrh/cfdocs/cfMAUDE/Detail.CFM?MDRFOI__ID=8159607&pc=MTA	2023826-2018-01834	2018-11-07	Injury	STAAR SURGICAL COMPANY	2018-12-13	MTA	IMPLANTABLE COLLAMER LENS (ICL)	Misfocusing; Inadequacy of Device Shape and/or Size; Optical Problem	Corneal Decompensation; Corneal Edema; Inflammation; Intraocular Pressure Increased; Pain; Blurred Vision; Visual Disturbances; No Code Available	P030016	NA	1	Event Description: THE REPORTER INDICATED THAT A 13.2MM MICL 13.2, -7.0 DIOPTER, IMPLANTABLE COLLAMER LENS WAS IMPLANTED INTO THE PATIENTS LEFT EYE (OS) ON (B)(6) 2018. EXCESSIVE VAULT, LEADING TO CORNEAL DECOMPENSATION, UNCONTROLLED IOP, NARROWING OF THE ANGLES, CORNEAL EDEMA, AND SHALLOWING OF THE ACD WAS OBSERVED. PAIN AND BLURRY VISION WAS REPORTED AS ADDITIONAL SYMPTOMS. ADDITIONAL SURGICAL …	Lens Extraction + Secondary Operation	Resolved
https://www.accessdata.fda.gov/scripts/cdrh/cfdocs/cfMAUDE/Detail.CFM?MDRFOI__ID=11231056&pc=MTA	2023826-2021-00199	2020-11-20	Injury	STAAR SURGICAL COMPANY	2021-01-26	MTA	IMPLANTABLE COLLAMER LENS (ICL)	Inadequacy of Device Shape and/or Size	Corneal Decompensation; Corneal Edema; Intraocular Pressure Increased; Appropriate Clinical Signs, Symptoms, Conditions Term / Code Not Available	NA#S-P#NA	NA	1	Event Description: THE REPORTER INDICATED THE SURGEON IMPLANTED A 13.2MM VICMO13.2 IMPLANTABLE COLLAMER LENS, -18.00 DIOPTER, IN THE PATIENTS RIGHT EYE (OD), ON (B)(6) 2020. THE LENS WAS EXPLANTED ON (B)(6) 2020 DUE TO EXCESSIVE VAULTING, ANGLE CLOSURE WITH ELEVATED INTRAOCULAR PRESSURE AND CORNEAL DECOMPENSATION. POST-OP, THERE WAS SEMI-MYDRIASIS (DILATION OF PUPIL) AND CORNEAL EDEMA. A POSSIBLE…	Lens Extraction	Resolved
https://www.accessdata.fda.gov/scripts/cdrh/cfdocs/cfMAUDE/Detail.CFM?MDRFOI__ID=13878560&pc=MTA	2023826-2022-00910	2021-09-24	Injury	STAAR SURGICAL COMPANY	2022-03-24	MTA	IMPLANTABLE COLLAMER LENS (ICL)	Misfocusing	Corneal Decompensation; Corneal Edema; Intraocular Pressure Increased; Blurred Vision; Appropriate Clinical Signs, Symptoms, Conditions Term / Code Not Available	NA	NA	1	Event Description: THE REPORTER INDICATED THAT THE SURGEON IMPLANTED AN 13.2MM VICM5_13.2; -10.50 DIOPTER; INTO THE PATIENT'S RIGHT EYE (OD) ON (B)(6) 2021. IT WAS REPORTED NON-CONFORMITY - UNRESPONSIVE HYPETONUS DESPITE SURGICAL PROCEDURE AND COMPLICATIONS. THE PATIENT EXPERIENCED LOSS OF BCVA; ELEVATED INTRAOCULAR PRESSURE; SIGNIFICANT REDUCTION OF IRIDO-CORNEAL ANGLES; CORNEAL DECOMPENSATION; …	Lens Extraction	Not_Resolved
https://www.accessdata.fda.gov/scripts/cdrh/cfdocs/cfMAUDE/Detail.CFM?MDRFOI__ID=13529754&pc=MTA	2023826-2022-00498	2022-02-05	Injury	STAAR SURGICAL COMPANY	2022-02-14	MTA	IMPLANTABLE COLLAMER LENS (ICL)	Inadequacy of Device Shape and/or Size	Corneal Decompensation; Glaucoma; Intraocular Pressure Increased; Pain; Pupillary Block; Appropriate Clinical Signs, Symptoms, Conditions Term / Code Not Available	NA	NA	1	Event Description: THE REPORTER INDICATED THAT THE SURGEON IMPLANTED A 12.6MM VICM5_12.6; -2 DIOPTER IMPLANTABLE COLLAMER LENS INTO THE PATIENT'S LEFT EYE (OS) ON (B)(6) 2022. THE PATIENT EXPERIENCED EXCESSIVE VAULTING; PUPIL BLOCK; ANGLE CLOSURE WITH ELEVATED INTRAOCULAR PRESSURE; CORNEAL DECOMPENSATION; MEDICATION USED; PAIN; GLAUCOMA AND IT WAS NOTED THAT YAG SURGERY WAS PERFORMED AS WELL AS P…	Lens Extraction	Resolved
https://www.accessdata.fda.gov/scripts/cdrh/cfdocs/cfMAUDE/Detail.CFM?MDRFOI__ID=7899789&pc=MTA	2023826-2018-01401	2017-06-24	Injury	STAAR SURGICAL COMPANY	2018-09-21	MTA	IMPLANTABLE COLLAMER LENS (ICL)	Adverse Event Without Identified Device or Use Problem	Corneal Decompensation; Inflammation; Intraocular Pressure Increased; No Code Available	NA	NA	1	Event Description: THE REPORTER INDICATED THE SURGEON IMPLANTED A 13.2MM VICM5_13.2 IMPLANTABLE COLLAMER LENS, -12.50 DIOPTER, IN THE PATIENT'S RIGHT EYE (OD), ON (B)(6) 2017. AT ONE DAY POST-OP, INFLAMMATION (TASS) PRESENTED IN THE EYE. CORTISONE WAS ADMINISTERED AND THE INFLAMMATION CLEARED UP. THE PATIENT ALSO EXPERIENCED ELEVATED INTRAOCULAR PRESSURE AND CORNEAL DECOMPENSATION. THE LENS WAS E…	Lens Extraction	Not_Resolved
https://www.accessdata.fda.gov/scripts/cdrh/cfdocs/cfMAUDE/Detail.CFM?MDRFOI__ID=6540579&pc=MTA	2023826-2017-00740	2017-01-11	Injury	STAAR SURGICAL COMPANY	2017-05-03	MTA	ICL (IMPLANTABLE COLLAMER LENS)	Inadequacy of Device Shape and/or Size	Corneal Decompensation; Intraocular Pressure Increased; Blurred Vision; Visual Disturbances; Halo; No Code Available	N/A	NA	1	Event Description: THE REPORTER INDICATED THAT THE SURGEON IMPLANTED A 13.2 MM VICM5_13.2 IMPLANTABLE COLLAMER LENS, -8.50 DIOPTER, IN THE PATIENT'S RIGHT EYE (OD) ON (B)(6) 2017. THE PATIENT EXPERIENCED EXCESSIVE VAULT, IRIS DISTORTION, ELEVATED IOP, SIGNIFICANT REDUCTION OF IRIDO-CORNEAL ANGLES, CORNEAL DECOMPENSATION, UNREACTIVE PUPIL, ANGLE CLOSURE, GLARE/HALOES, BLURRED VISION. ON (B)(6) 201…	Lens Exchange	Resolved
https://www.accessdata.fda.gov/scripts/cdrh/cfdocs/cfMAUDE/Detail.CFM?MDRFOI__ID=8529658&pc=MTA	2023826-2019-00632	2019-03-19	Injury	STAAR SURGICAL COMPANY	2019-04-18	MTA	IMPLANTABLE COLLAMER LENS (ICL)	Inadequacy of Device Shape and/or Size	Corneal Decompensation; Intraocular Pressure Increased; No Code Available	P030016	NA	1	Event Description: THE REPORTER INDICATED THAT A 13.2MM, MICL13.2, -10.5 DIOPTER, IMPLANTABLE COLLAMER LENS WAS IMPLANTED INTO THE PATIENTS RIGHT EYE (OD) ON (B)(6) 2019. ON (B)(6) 2019 THE LENS WAS REMOVED DUE TO EXCESSIVE VAULT, PUPIL BLOCK WITH IOP (INTRAOCULAR PRESSURE), ANGLE CLOSURE, CORNEAL DECOMPENSATION, LENS DISLOCATION/SUBLUXATION, AND UNREACTIVE (FIXED) PUPIL. A REPLACEMENT LENS OF SH…	Lens Exchange	Unknown
https://www.accessdata.fda.gov/scripts/cdrh/cfdocs/cfMAUDE/Detail.CFM?MDRFOI__ID=12125559&pc=MTA	2023826-2021-02334	2020-09-20	Injury	STAAR SURGICAL COMPANY	2021-07-06	MTA	IMPLANTABLE COLLAMER LENS (ICL)	Adverse Event Without Identified Device or Use Problem	Corneal Decompensation; Intraocular Pressure Increased; Retinal Detachment; Appropriate Clinical Signs, Symptoms, Conditions Term / Code Not Available	NA	NA	1	Event Description: THE REPORTER INDICATED THE SURGEON IMPLANTED A 12.6MM VICMO12.6 IMPLANTABLE COLLAMER LENS, -18.00 DIOPTER, IN THE PATIENTS LEFT EYE (OS), ON (B)(6) 2020. THE LENS WAS EXPLANTED ON (B)(6) 2020 DUE TO ANGLE CLOSURE, WITH ELEVATED INTRAOCULAR PRESSURE (IOP), CORNEAL DECOMPENSATION AND RETINAL DETACHMENT. PHACO-EMULSIFICATION (CATARACT SURGERY), IOL IMPLANTATION AND RETINAL REPAIR …	Lens Exchange + Secondary Operation	Resolved
https://www.accessdata.fda.gov/scripts/cdrh/cfdocs/cfMAUDE/Detail.CFM?MDRFOI__ID=5639098&pc=MTA	2023826-2016-00630	2016-03-11	Injury	STAAR SURGICAL COMPANY	2016-05-06	MTA	ICL (IMPLANTABLE COLLAMER LENS)	Appropriate Term/Code Not Available	Corneal Edema; Endophthalmitis; Hypopyon; Intraocular Pressure Increased; Pupillary Block; Vitrectomy; No Code Available	P030016	NA	1	Event Description: THE REPORTER STATED THE SURGEON IMPLANTED A 13.7MM MICL13.7 IMPLANTABLE COLLAMER LENS, -8.0 DIOPTER, IN THE PATIENT'S RIGHT EYE (OD) ON (B)(6) 2016. ON (B)(6) 2016 THE PATIENT PRESENTED WITH POST-OP ENDOPHTHALMITIS. THE PATIENT UNDERWENT A VITRECTOMY WITH ANTIBIOTIC INJECTION. THE PATIENT EXPERIENCED HYPOPYON, PUPILLARY BLOCK, WITH ELEVATED INTRAOCULAR PRESSURE AND CORNEAL EDEM…	Lens Extraction + Secondary Operation	Unknown
https://www.accessdata.fda.gov/scripts/cdrh/cfdocs/cfMAUDE/Detail.CFM?MDRFOI__ID=16850587&pc=MTA	2023826-2023-01613	2023-03-15	Injury	STAAR SURGICAL COMPANY	2023-05-01	MTA	IMPLANTABLE COLLAMER LENS (ICL)	Adverse Event Without Identified Device or Use Problem	Corneal Edema; Intraocular Pressure Increased	P030016	NA	1	Event Description: THE REPORTER INDICATED THAT A 13.7MM, VICMO 13.7, -14.50 DIOPTER, IMPLANTABLE COLLAMER LENS WAS IMPLANTED INTO THE PATIENTS RIGHT EYE (OD) ON (B)(6) 2023. ON (B)(6) 2023 THE LENS WAS EXPLANTED DUE TO ELEVATED INTRAOCULAR PRESSURE WITHOUT PUPIL BLOCK AND ANGLE CLOSURE. A REPLACEMENT LENS OF SHORTER LENGTH WAS LATER IMPLANTED AND THE PROBLEM RESOLVED. IT WAS ALSO REPORTED THAT CO…	Lens Exchange	Resolved
https://www.accessdata.fda.gov/scripts/cdrh/cfdocs/cfMAUDE/Detail.CFM?MDRFOI__ID=12677856&pc=MTA	2023826-2021-04046	2021-09-10	Injury	STAAR SURGICAL COMPANY	2021-10-21	MTA	IMPLANTABLE COLLAMER LENS (ICL)	Misfocusing; Unintended Movement	Corneal Edema; Intraocular Pressure Increased; Blurred Vision	NA	NA	1	Event Description: THE REPORTER INDICATED THE SURGEON INSERTED AND REMOVED A 12.1MM VICM5_12.1 IMPLANTABLE COLLAMER LENS, -06.50 DIOPTER, WITHIN THE SAME SURGERY DUE TO THE LENS WAS INSERTED UPSIDE DOWN IN THE PATIENTS RIGHT EYE (OD). THE PATIENTS INTRAOCULAR PRESSURE (IOP) WAS ELEVATED DURING THE SURGERY AND THE PATIENT COMPLAINED OF BLURRED VISION. THE LENS WAS REPLACED DURING THE SAME SURGERY …	Lens Exchange	Resolved
https://www.accessdata.fda.gov/scripts/cdrh/cfdocs/cfMAUDE/Detail.CFM?MDRFOI__ID=6711487&pc=MTA	2023826-2017-01177	2017-06-16	Injury	STAAR SURGICAL COMPANY	2017-07-13	MTA	IMPLANTABLE COLLAMER LENS (ICL)	Device Dislodged or Dislocated	Corneal Edema; Intraocular Pressure Increased; Blurred Vision; No Code Available	N/A	NA	1	Event Description: THE REPORTER INDICATED THAT THE SURGEON IMPLANTED A 12.6MM VICMO12.6, DIOPTER -18.00 IMPLANTABLE COLLAMER LENS, INTO THE PATIENT'S RIGHT EYE (OD) ON (B)(6) 2017. FOLLOW UP ON (B)(6) 2017, THE PATIENT EXPERIENCED LENS ROTATION NOT ASSOCIATED TO LOW VAULT, BLURRED AND DIMNESS OF VISION, ELEVATED IOP, IRIS PIGMENTATION, FIXED SEMI DILATED PUPIL, CORNEA OEDEMATUS. NEXT DAY, THE ANT…	Lens Extraction + Secondary Operation	Resolved
https://www.accessdata.fda.gov/scripts/cdrh/cfdocs/cfMAUDE/Detail.CFM?MDRFOI__ID=8903520&pc=MTA	2023826-2019-01478	2019-07-16	Injury	STAAR SURGICAL COMPANY	2019-08-16	MTA	IMPLANTABLE COLLAMER LENS (ICL)	Misfocusing; Inadequacy of Device Shape and/or Size	Corneal Edema; Intraocular Pressure Increased; Blurred Vision; No Code Available	N/A	NA	1	Event Description: THE REPORTER INDICATED THAT A 13.2MM, VICMO13.2, -12.00 DIOPTER, IMPLANTABLE COLLAMER LENS WAS IMPLANTERD INTO THE PATIENTS RIGHT EYE (OD) ON (B)(6) 2019. EXCESSIVE VAULT, REFRACTIVE SURPRISE, ELEVATED IOP (INTRAOCULAR PRESSURE), SIGNIFICANT REDUCTION OF IRIDO-CORNEAL ANGLES AND BLURRED VISION WAS OBSERVED. ADDITION OF NEW PI (YAG) WAS REPORTED AS SECONDARY INTERVENTION. THE RE…	Lens Retention + Secondary Operation	Resolved
https://www.accessdata.fda.gov/scripts/cdrh/cfdocs/cfMAUDE/Detail.CFM?MDRFOI__ID=5688628&pc=MTA	2023826-2016-00670	NA	Injury	STAAR SURGICAL COMPANY	2016-05-31	MTA	ICL (IMPLANTABLE COLLAMER LENS)	Device Operates Differently Than Expected; Appropriate Term/Code Not Available	Corneal Edema; Intraocular Pressure Increased; No Code Available	N/A	NA	1	Event Description: THE REPORTER INDICATED THAT THE SURGEON IMPLANTED A 13.2MM VICMO13.2 IMPLANTABLE COLLAMER LENS, -11.50 DIOPTER, IN THE PATIENT'S RIGHT EYE (OD). THE PATIENT EXPERIENCED ELEVATED IOP, HAZY VISION, PIGMENT DISPERSION, AND MILD EDEMA. LASER PERIPHERAL IRIDOTOMY (LASER PI) WAS PERFORMED TO LOWER INTRAOCULAR PRESSURE. THE LENS REMAINS IMPLANTED. THE PATIENT'S POST-OP BEST-CORRECTED …	Lens Retention + Secondary Operation	Resolved
https://www.accessdata.fda.gov/scripts/cdrh/cfdocs/cfMAUDE/Detail.CFM?MDRFOI__ID=5745383&pc=MTA	2023826-2016-00851	NA	Injury	STAAR SURGICAL COMPANY	2016-06-23	MTA	ICL (IMPLANTABLE COLLAMER LENS)	Difficult to Remove; Inadequacy of Device Shape and/or Size; Appropriate Term/Code Not Available	Corneal Edema; Intraocular Pressure Increased; No Code Available	P030016	NA	1	Event Description: THE REPORTER STATED THE SURGEON IMPLANTED A 13.2MM MICL13.2 IMPLANTABLE COLLAMER LENS, -15.5 DIOPTER, IN THE PATIENT'S RIGHT EYE (OD) ON (B)(6) /2016. THE LENS WAS EXPLANTED ON (B)(6) 2016 DUE TO AN EXCESSIVE VAULT. THE LENS WAS EXCHANGED FOR A 12.6MM ICL. THERE WAS NO PATIENT INJURY. ADDITIONAL INFORMATION HAS BEEN REQUESTED BUT NONE HAS BEEN FORTHCOMING. IF ADDITIONAL INFORMA…	Unknown	Unknown
https://www.accessdata.fda.gov/scripts/cdrh/cfdocs/cfMAUDE/Detail.CFM?MDRFOI__ID=7070542&pc=MTA	2023826-2017-01801	2017-08-17	Injury	STAAR SURGICAL COMPANY	2017-11-30	MTA	IMPLANTABLE COLLAMER LENS (ICL)	Inadequacy of Device Shape and/or Size	Corneal Edema; Intraocular Pressure Increased; No Code Available	NA	NA	1	Event Description: THE REPORTER INDICATED THE SURGEON IMPLANTED A 13.7MM VICM5_13.7 IMPLANTABLE COLLAMER LENS, -09.00 DIOPTER, IN THE PATIENT'S RIGHT EYE (OD), ON (B)(6) 2017. THE LENS WAS EXPLANTED ON (B)(6) 2017 DUE TO EXCESSIVE VAULTING AND ANGLE CLOSURE, WITH ELEVATED INTRAOCULAR PRESSURE. THE LENS WAS EXCHANGED FOR A SHORTER LENS AND THE PROBLEM WAS RESOLVED. AT THE POST-OP VISIT ON (B)(6) 2…	Lens Exchange	Resolved
https://www.accessdata.fda.gov/scripts/cdrh/cfdocs/cfMAUDE/Detail.CFM?MDRFOI__ID=5602196&pc=MTA	2023826-2016-00514	2016-01-02	Injury	STAAR SURGICAL COMPANY	2016-04-22	MTA	ICL (IMPLANTABLE COLLAMER LENS)	Inadequacy of Device Shape and/or Size; Appropriate Term/Code Not Available	Corneal Edema; Intraocular Pressure Increased; No Code Available	NA	NA	1	Event Description: THE REPORTER INDICATED THE SURGEON IMPLANTED A 12.6MM VICMO12.6 IMPLANTABLE COLLAMER LENS, -18.00 DIOPTER, IN THE PATIENT'S LEFT EYE (OS) ON (B)(6) 2015. THE LENS WAS EXPLANTED ON (B)(6) 2016 DUE TO EXCESSIVE VAULTING AND ELEVATED INTRAOCULAR PRESSURE. THE LENS WAS EXCHANGED FOR A SHORTER LENS AND THE PROBLEM WAS RESOLVED. THE PATIENT'S POST-OP BEST-CORRECTED VISUAL ACUITY WAS …	Lens Exchange	Resolved
https://www.accessdata.fda.gov/scripts/cdrh/cfdocs/cfMAUDE/Detail.CFM?MDRFOI__ID=5602203&pc=MTA	2023826-2016-00515	2016-01-02	Injury	STAAR SURGICAL COMPANY	2016-04-22	MTA	ICL (IMPLANTABLE COLLAMER LENS)	Inadequacy of Device Shape and/or Size; Appropriate Term/Code Not Available	Corneal Edema; Intraocular Pressure Increased; No Code Available	NA	NA	1	Event Description: THE REPORTER INDICATED THE SURGEON IMPLANTED A 12.6MM VICMO12.6 IMPLANTABLE COLLAMER LENS, -18.00 DIOPTER, IN THE PATIENT'S RIGHT EYE (OD) ON (B)(6) 2015. THE LENS WAS EXPLANTED ON (B)(6) 2016 DUE TO EXCESSIVE VAULTING AND ELEVATED INTRAOCULAR PRESSURE. THE LENS WAS EXCHANGED FOR A SHORTER LENS AND THE PROBLEM WAS RESOLVED. THE PATIENT'S POST-OP BEST-CORRECTED VISUAL ACUITY WAS…	Lens Exchange	Resolved
https://www.accessdata.fda.gov/scripts/cdrh/cfdocs/cfMAUDE/Detail.CFM?MDRFOI__ID=5652092&pc=MTA	2023826-2016-00637	NA	Injury	STAAR SURGICAL COMPANY	2016-05-12	MTA	ICL (IMPLANTABLE COLLAMER LENS)	Inadequacy of Device Shape and/or Size; Appropriate Term/Code Not Available	Corneal Edema; Intraocular Pressure Increased; No Code Available	P030016	NA	1	Event Description: THE REPORTER STATED THE SURGEON IMPLANTED A 13.7MM MICL13.7 IMPLANTABLE COLLAMER LENS, -8.0 DIOPTER, IN THE PATIENT'S LEFT EYE (OS) ON (B)(6) 2016. THE LENS WAS EXPLANTED ON (B)(6) 2016 DUE TO EXCESSIVE VAULTING, NARROWING OF THE ANGLE, ANGLE CLOSURE, SHALLOWING OF THE ANTERIOR CHAMBER AND ELEVATED INTRAOCULAR PRESSURE. THE LENS WAS NOT EXCHANGED FOR ANOTHER LENS. THE PATIENT H…	Lens Exchange	Unknown
https://www.accessdata.fda.gov/scripts/cdrh/cfdocs/cfMAUDE/Detail.CFM?MDRFOI__ID=5652096&pc=MTA	2023826-2016-00638	NA	Injury	STAAR SURGICAL COMPANY	2016-05-12	MTA	ICL (IMPLANTABLE COLLAMER LENS)	Inadequacy of Device Shape and/or Size; Appropriate Term/Code Not Available	Corneal Edema; Intraocular Pressure Increased; No Code Available	P030016	NA	1	Event Description: THE REPORTER INDICATED THE SURGEON IMPLANTED A 13.7MM MICL13.7 IMPLANTABLE COLLAMER LENS, -9.5 DIOPTER, IN THE PATIENT'S RIGHT EYE (OD) ON (B)(6) 2016. THE LENS WAS EXPLANTED ON (B)(6) 2016 DUE TO EXCESSIVE VAULTING, NARROWING OF THE ANGLE, ANGLE CLOSURE, SHALLOWING OF THE ANTERIOR CHAMBER AND ELEVATED INTRAOCULAR PRESSURE. THE REPORTER INDICATED THERE WAS ENDOTHELIAL TOUCH. TH…	Lens Extraction	Unknown
https://www.accessdata.fda.gov/scripts/cdrh/cfdocs/cfMAUDE/Detail.CFM?MDRFOI__ID=8903395&pc=MTA	2023826-2019-01477	2019-07-16	Injury	STAAR SURGICAL COMPANY	2019-08-16	MTA	IMPLANTABLE COLLAMER LENS (ICL)	Misfocusing; Inadequacy of Device Shape and/or Size	Corneal Edema; Intraocular Pressure Increased; No Code Available	N/A	NA	1	Event Description: THE REPORTER INDICATED THAT A 13.2MM, VICMO13.2, -12.00 DIOPTER, IMPLANTABLE COLLAMER LENS WAS IMPLANTERD INTO THE PATIENTS LEFT EYE (OS) ON (B)(6) 2019. EXCESSIVE VAULT, REFRACTIVE SURPRISE, ELEVATED IOP (INTRAOCULAR PRESSURE) AND SIGNIFICANT REDUCTION OF IRIDO-CORNEAL ANGLES WAS OBSERVED. ADDITION OF NEW PI (YAG) WAS REPORTED AS SECONDARY INTERVENTION. THE REPORTER STATED THA…	Lens Retention + Secondary Operation	Resolved
https://www.accessdata.fda.gov/scripts/cdrh/cfdocs/cfMAUDE/Detail.CFM?MDRFOI__ID=9957614&pc=MTA	2023826-2020-00848	2019-07-08	Injury	STAAR SURGICAL COMPANY	2020-04-14	MTA	IMPLANTABLE COLLAMER LENS (ICL)	Off-Label Use; Adverse Event Without Identified Device or Use Problem	Corneal Edema; Intraocular Pressure Increased; No Code Available	N/A	NA	1	Event Description: THE REPORTER INDICATED THAT THE SURGEON IMPLANTED A 12.6MM VICMO12.6, -11.50 DIOPTER, IMPLANTABLE COLLAMER LENS INTO THE PATIENT'S RIGHT EYE (OD) ON (B)(6) 2019. ELEVATED IOP (30 MMHG) WITHOUT PUPIL BLOCK AND ANGLE CLOSURE WERE OBSERVED AND THE LENS WAS REMOVED ON (B)(6) 2020. CAUSE OF THE EVENT IS REPORTED AS UNKNOWN. REPORTEDLY, "THE PATIENT PRESENTED WITH HIGH INTRAOCULAR PR…	Lens Extraction	Not_Resolved
https://www.accessdata.fda.gov/scripts/cdrh/cfdocs/cfMAUDE/Detail.CFM?MDRFOI__ID=9957617&pc=MTA	2023826-2020-00849	2019-07-10	Injury	STAAR SURGICAL COMPANY	2020-04-14	MTA	IMPLANTABLE COLLAMER LENS (ICL)	Off-Label Use; Adverse Event Without Identified Device or Use Problem	Corneal Edema; Intraocular Pressure Increased; No Code Available	N/A	NA	1	Event Description: THE REPORTER INDICATED THAT THE SURGEON IMPLANTED A 12.6MM VICMO12.6, -11.00 DIOPTER, IMPLANTABLE COLLAMER LENS INTO THE PATIENT'S LEFT EYE (OS) ON (B)(6) 2019. ELEVATED IOP (26MMHG) WITHOUT PUPIL BLOCK AND ANGLE CLOSURE WERE OBSERVED AND THE LENS WAS REMOVED ON (B)(6) 2020. CAUSE OF THE EVENT IS REPORTED AS UNKNOWN. REPORTEDLY, "THE PATIENT PRESENTED WITH HIGH INTRAOCULAR PRES…	Lens Extraction	Not_Resolved
https://www.accessdata.fda.gov/scripts/cdrh/cfdocs/cfMAUDE/Detail.CFM?MDRFOI__ID=11043753&pc=MTA	2023826-2020-03159	2020-11-20	Injury	STAAR SURGICAL COMPANY	2020-12-21	MTA	IMPLANTABLE COLLAMER LENS (ICL)	Inadequacy of Device Shape and/or Size	Corneal Edema; Intraocular Pressure Increased; Optical Nerve Damage; Pupillary Block; Blurred Vision; Visual Disturbances; Halo; Appropriate Clinical Signs, Symptoms, Conditions Term / Code Not Available	P030016	NA	1	Event Description: THE REPORTER INDICATED THAT AN IMPLANTABLE COLLAMER LENS WAS IMPLANTED INTO THE PATIENTS EYE AND THE PATIENT EXPERIENCED HIGH VAULT AND HIGH IOP (INTRAOCULAR PRESSURE). LENS REMAINS IMPLANTED. ADDITIONAL INFORMATION HAS BEEN REQUESTED BUT NONE HAS BEEN FORTHCOMING. IF ADDITIONAL INFORMATION IS RECEIVED A SUPPLEMENTAL MEDWATCH REPORT WILL BE SUBMITTED. Manufacturer Narrative: B5…	Lens Retention + Secondary Operation	Resolved
https://www.accessdata.fda.gov/scripts/cdrh/cfdocs/cfMAUDE/Detail.CFM?MDRFOI__ID=7097942&pc=MTA	2023826-2017-01842	2017-10-29	Injury	STAAR SURGICAL COMPANY	2017-12-07	MTA	IMPLANTABLE COLLAMER LENS (ICL)	Inadequacy of Device Shape and/or Size	Corneal Edema; Intraocular Pressure Increased; Pain; Blurred Vision; No Code Available	P030016	NA	1	Event Description: THE REPORTER INDICATED THAT THE SURGEON IMPLANTED A MICL13.2, -10.5 DIOPTER, IMPLANTABLE COLLAMER LENS IN THE PATIENT'S RIGHT EYE (OD) ON (B)(6) 2017. THE LENS WAS EXPLANTED ON (B)(6) 2017 DUE TO EXCESSIVE VAULTING, ELEVATED IOP, ANGLE CLOSURE, NARROWING OF THE ANGLE, SHALLOWING OF THE ACD, BLURRY VISION, PAIN AND CORNEAL EDEMA. PARACENTESIS WAS DONE TO LOWER THE PRESSURE. THE …	Lens Exchange	Resolved
https://www.accessdata.fda.gov/scripts/cdrh/cfdocs/cfMAUDE/Detail.CFM?MDRFOI__ID=7366387&pc=MTA	2023826-2018-00456	NA	Injury	STAAR SURGICAL COMPANY	2018-03-23	MTA	IMPLANTABLE COLLAMER LENS (ICL)	Inadequacy of Device Shape and/or Size	Corneal Edema; Intraocular Pressure Increased; Pain; Blurred Vision; No Code Available	NA	NA	1	Event Description: THE REPORTER INDICATED THE SURGEON IMPLANTED A 12.6 MM VICMO12.6 IMPLANTABLE COLLAMER LENS, -07.50 DIOPTER, IN THE PATIENT'S LEFT EYE (OS) ON (B)(6) 2018. THE LENS WAS EXPLANTED ON (B)(6) 2018 DUE TO EXCESSIVE VAULTING, SIGNIFICANT REDUCTION OF IRIDO-CORNEAL ANGLES, NARROW ANGLES, ELEVATED INTRAOCULAR PRESSURE (IOP) AND CORNEAL EDEMA. THE PATIENT EXPERIENCED INTERMITTENT DECREA…	Lens Extraction	Resolved
https://www.accessdata.fda.gov/scripts/cdrh/cfdocs/cfMAUDE/Detail.CFM?MDRFOI__ID=7366474&pc=MTA	2023826-2018-00455	NA	Injury	STAAR SURGICAL COMPANY	2018-03-23	MTA	IMPLANTABLE COLLAMER LENS (ICL)	Inadequacy of Device Shape and/or Size	Corneal Edema; Intraocular Pressure Increased; Pain; Blurred Vision; No Code Available	NA	NA	1	Event Description: THE REPORTER INDICATED THE SURGEON IMPLANTED A 12.6 MM VICMO12.6 IMPLANTABLE COLLAMER LENS, -09.00 DIOPTER, IN THE PATIENT'S RIGHT EYE (OD) ON (B)(6) 2018. THE LENS WAS EXPLANTED ON (B)(6) 2018 DUE TO EXCESSIVE VAULTING, SIGNIFICANT REDUCTION OF IRIDO-CORNEAL ANGLES, NARROW ANGLES, ELEVATED INTRAOCULAR PRESSURE (IOP) AND CORNEAL EDEMA. THE PATIENT EXPERIENCED INTERMITTENT DECRE…	Lens Extraction	Resolved
https://www.accessdata.fda.gov/scripts/cdrh/cfdocs/cfMAUDE/Detail.CFM?MDRFOI__ID=6439246&pc=MTA	2023826-2017-00486	2017-01-16	Injury	STAAR SURGICAL COMPANY	2017-03-28	MTA	ICL (IMPLANTABLE COLLAMER LENS)	Device Operates Differently Than Expected	Corneal Edema; Intraocular Pressure Increased; Pain; Pupillary Block; Blurred Vision; No Code Available	N/A	NA	1	Event Description: THE REPORTER INDICATED THAT THE SURGEON IMPLANTED A 13.2MM VICM5_13.2 IMPLANTABLE COLLAMER LENS, -7.00 DIOPTER, IN THE PATIENT'S LEFT EYE (OS) ON (B)(6) 2017. ON (B)(6) 2017 THE PATIENT EXPERIENCED IRIS HERNIATION, AND REDUCTION SURGERY. ON THE NEXT DAY, THE PATIENT EXPERIENCED OCULAR PAIN AND BLURRY VISION, WITH SHALLOW ANTERIOR CHAMBER, MODERATE DIFFUSE CORNEAL EDEMA AND OCUL…	Lens Retention + Secondary Operation	Resolved
https://www.accessdata.fda.gov/scripts/cdrh/cfdocs/cfMAUDE/Detail.CFM?MDRFOI__ID=6872434&pc=MTA	2023826-2017-01443	2017-08-20	Injury	STAAR SURGICAL COMPANY	2017-09-18	MTA	IMPLANTABLE COLLAMER LENS (ICL)	Inadequacy of Device Shape and/or Size	Corneal Edema; Intraocular Pressure Increased; Pain; Pupillary Block; Blurred Vision; No Code Available	P030016	NA	1	Event Description: THE REPORTER INDICATED THAT THE SURGEON IMPLANTED A MICL12.6, -6.0 DIOPTER, IMPLANTABLE COLLAMER LENS IN THE PATIENT'S RIGHT EYE (OD) ON (B)(6) 2017. ON (B)(6) 2017, THE LENS WAS EXPLANTED DUE TO EXCESSIVE VAULTING, ANGLE CLOSURE, ELEVATED IOP, NARROWING OF THE ANGLE, BLURRY VISION, PAIN, PUPILLARY BLOCK, AND CORNEAL EDEMA. THE LENS WAS EXCHANGED FOR A SHORTER LENS AND VIGAMOX …	Lens Exchange	Resolved
https://www.accessdata.fda.gov/scripts/cdrh/cfdocs/cfMAUDE/Detail.CFM?MDRFOI__ID=6658366&pc=MTA	2023826-2017-00957	2017-05-02	Injury	STAAR SURGICAL COMPANY	2017-06-21	MTA	IMPLANTABLE COLLAMER LENS (ICL)	Inadequacy of Device Shape and/or Size	Corneal Edema; Intraocular Pressure Increased; Pupillary Block; Blurred Vision; No Code Available	P030016	NA	1	Event Description: THE REPORTER INDICATED THE SURGEON IMPLANTED A 13.2MM MICL13.2 IMPLANTABLE COLLAMER LENS, -12.5 DIOPTER, IN THE PATIENT'S RIGHT EYE (OD) ON (B)(6) 2017. THE LENS WAS EXPLANTED ON (B)(6) 2017 DUE TO EXCESSIVE VAULTING, ELEVATED INTRAOCULAR PRESSURE, PUPILLARY BLOCK, NARROWING OF THE ANGLE AND SHALLOWING OF THE ANTERIOR CHAMBER. THE PATIENT EXPERIENCED BLURRY VISION AND CORNEAL E…	Lens Extraction + Secondary Operation	Unknown
https://www.accessdata.fda.gov/scripts/cdrh/cfdocs/cfMAUDE/Detail.CFM?MDRFOI__ID=11234650&pc=MTA	2023826-2021-00225	2020-11-20	Injury	STAAR SURGICAL COMPANY	2021-01-27	MTA	IMPLANTABLE COLLAMER LENS (ICL)	Inadequacy of Device Shape and/or Size	Corneal Edema; Intraocular Pressure Increased; Pupillary Block; Blurred Vision; Visual Disturbances; Halo; Appropriate Clinical Signs, Symptoms, Conditions Term / Code Not Available	P030016	NA	1	Event Description: THE REPORTER INDICATED THAT A 13.2MM, MICL13.2, -6.0 DIOPTER, IMPLANTABLE COLLAMER LENS WAS IMPLANTED INTO THE PATIENTS LEFT EYE (OS) ON (B)(6) 2020. EXCESSIVE VAULT, PUPIL BLOCK, ANGLE CLOSURE WITH ELEVATED IOP (43MMHG), GLARE/HALOES AND BLURRED VISION WAS OBSERVED. ADDITIONAL SURGICAL INTERVENTION (PI) WAS PERFORMED. IT WAS REPORTED THAT THE PROBLEM RESOLVED, LAST VISIT DATE …	Lens Retention + Secondary Operation	Resolved
https://www.accessdata.fda.gov/scripts/cdrh/cfdocs/cfMAUDE/Detail.CFM?MDRFOI__ID=6501830&pc=MTA	2023826-2017-00562	2017-03-30	Injury	STAAR SURGICAL COMPANY	2017-04-18	MTA	IMPLANTABLE COLLAMER LENS (ICL)	Inadequacy of Device Shape and/or Size	Corneal Edema; Intraocular Pressure Increased; Pupillary Block; No Code Available	P990013	NA	1	Event Description: THE REPORTER STATED THAT A MICL13.2, -6.5 DIOPTER, IMPLANTABLE COLLAMER LENS WAS IMPLANTED IN THE PATIENT'S LEFT EYE ON (B)(6) 2017. THE LENS WAS EXPLANTED ON (B)(6) 2017 DUE TO PUPILLARY BLOCK CAUSING ELEVATED IOP. THE REPORTER INDICATED THE PATIENT HAD EXCESSIVE VAULT, NARROWING OF THE ANGLE, ANGLE CLOSURE AND SHALLOWING OF THE ACD. THE PATIENT'S REPORTED CONDITION AT THE TIM…	Lens Extraction	Resolved
https://www.accessdata.fda.gov/scripts/cdrh/cfdocs/cfMAUDE/Detail.CFM?MDRFOI__ID=9338922&pc=MTA	2023826-2019-02167	NA	Injury	STAAR SURGICAL COMPANY	2019-11-18	MTA	IMPLANTABLE COLLAMER LENS (ICL)	Inadequacy of Device Shape and/or Size	Cyst(s); Intraocular Pressure Increased; Pain; No Code Available	NA	NA	1	Event Description: AN ARTICLE WAS RECEIVED THAT CITED A CASE STUDY THAT FOUND PATIENT IMPLANTED WITH A 12.1MM IMPLANTABLE COLLAMER LENS, -6.00 DIOPTER IN THE PATIENTS RIGHT EYE (OD). AT ONE DAY POST-OPERATIVE, THE PATIENT SUFFERED PAINFUL EYE. THE PATIENT HAD SEVERE CORNEAL EDEMA. SLIT-LAMP EXAMINATION SHOWED IRIDO-CORNEAL CONTACT AT TEMPORAL MID-PERIPHERY, SHALLOW ANTERIOR CHAMBER WITH CENTRAL V…	Lens Retention + Secondary Operation	Unknown
https://www.accessdata.fda.gov/scripts/cdrh/cfdocs/cfMAUDE/Detail.CFM?MDRFOI__ID=12749254&pc=MTA	2023826-2021-04225	2021-07-04	Injury	STAAR SURGICAL COMPANY	2021-11-03	MTA	IMPLANTABLE COLLAMER LENS (ICL)	Off-Label Use; Adverse Event Without Identified Device or Use Problem	Discomfort; Eye Pain	NA	NA	1	Event Description: THE REPORTER INDICATED THAT A 12.1MM, VICMO_12.1 -6.0 DIOPTER, IMPLANTABLE COLLAMER LENS WAS IMPLANTED INTO THE PATIENTS RIGHT EYE (OD) ON (B)(6) 2021. ON (B)(6) 2021 THE LENS WAS EXPLANTED DUE TO PATIENT EXPERIENCING DISCOMFORT AND PAIN, THE REPORTER STATED " PATIENTS IGNORANT STARRY EYES ARE UNCOMFORTABLE, PAIN". THIS EXPLANT RESOLVED THE PROBLEM. CAUSE WAS UNKNOWN. Manufactu…	Lens Extraction	Resolved
https://www.accessdata.fda.gov/scripts/cdrh/cfdocs/cfMAUDE/Detail.CFM?MDRFOI__ID=14107540&pc=MTA	2023826-2022-01096	2022-01-11 05:00:00	Injury	STAAR SURGICAL COMPANY	2022-04-13 04:00:00	MTA	IMPLANTABLE COLLAMER LENS (ICL)	Off-Label Use; Adverse Event Without Identified Device or Use Problem	Discomfort; Eye Pain	NA	NA	1	Event Description: THE REPORTER INDICATED THE SURGEON IMPLANTED A 13.2MM VICMO13.2 IMPLANTABLE COLLAMER LENS, -08.50 DIOPTER, IN THE PATIENTS LEFT EYE (OS), ON (B)(6) 2022. THE LENS WAS EXPLANTED ON (B)(6) 2022 FOR RELIEF OF EYE PAIN AND DISCOMFORT. THE PROBLEM WAS RESOLVED. THE CAUSE OF THE EVENT WAS UNKNOWN. Manufacturer Narrative: WEIGHT: UNK. ETHNICITY: UNK. RACE: UNK. PMA/510K: THIS PRODUCT …	Lens Extraction	Resolved
https://www.accessdata.fda.gov/scripts/cdrh/cfdocs/cfMAUDE/Detail.CFM?MDRFOI__ID=8774155&pc=MTA	2023826-2019-01205	2015-11-12 05:00:00	Injury	STAAR SURGICAL COMPANY	2019-07-09 04:00:00	MTA	IMPLANTABLE COLLAMER LENS	Misfocusing	Dry Eye(s); Headache; Pain; Red Eye(s); Blurred Vision; No Code Available	NA	NA	1	Event Description: THE REPORTER INDICATED THAT THE SURGEON IMPLANTED AN IMPLANTABLE COLLAMER LENS, -13.0 DIOPTER INTO THE PATIENT'S LEFTT EYE (OS) IN (B)(6) OF 2015. HYPERMETROPIA OF +1, ASTIGMATISM OF "AROUND" 0.5, PAIN, AND RED EYE IS REPORTED. LASIK SURGERY WAS PERFORMED (B)(6) 2017 WHICH RESOLVED THE PROBLEM. HOWEVER, RED EYE STILL OCCURS APPROXIMATELY EVERY 2 MONTHS. Manufacturer Narrative: …	Lens Retention + Secondary Operation	Resolved
https://www.accessdata.fda.gov/scripts/cdrh/cfdocs/cfMAUDE/Detail.CFM?MDRFOI__ID=8574636&pc=MTA	2023826-2019-00729	NA	Malfunction	STAAR SURGICAL COMPANY	2019-05-02 04:00:00	MTA	IMPLANTABLE COLLAMER LENS (ICL)	Adverse Event Without Identified Device or Use Problem	Dry Eye(s); Intraocular Pressure Increased; Eye Pain	P030016	NA	1	Event Description: THE PATIENT REPORTED THAT HE HAD A 13.2MM, MICL13.2, -10.0 DIOPTER, IMPLANTABLE COLLAMER LENS IMPLANTED INTO HIS RIGHT EYE (OD) ON (B)(6) 2018. THE PATIENT STATES THAT HE IS EXPERIENCING CHRONIC EYE SYNDROME SINCE THE IMPLANT WAS PLACED. HE INDICATED THAT HE DID NOT HAVE THIS PRIOR TO THE ACTUAL SURGERY. HE STATES THAT WHEN HE TAPES HIS EYE SHUT THE CONDITION IS NOT AS SEVERE A…	Unknown	Unknown
https://www.accessdata.fda.gov/scripts/cdrh/cfdocs/cfMAUDE/Detail.CFM?MDRFOI__ID=8575042&pc=MTA	2023826-2019-00730	NA	Malfunction	STAAR SURGICAL COMPANY	2019-05-02 04:00:00	MTA	IMPLANTABLE COLLAMER LENS (ICL)	Adverse Event Without Identified Device or Use Problem	Dry Eye(s); Intraocular Pressure Increased; Eye Pain	P030016	NA	1	Event Description: THE PATIENT REPORTED THAT HE HAD A 13.2MM, MICL13.2, -10.0 DIOPTER, IMPLANTABLE COLLAMER LENS IMPLANTED INTO HIS LEFT EYE (OS) ON (B)(6) 2018. THE PATIENT STATES THAT HE IS EXPERIENCING CHRONIC EYE SYNDROME SINCE THE IMPLANT WAS PLACED. HE INDICATED THAT HE DID NOT HAVE THIS PRIOR TO THE ACTUAL SURGERY. HE STATES THAT WHEN HE TAPES HIS EYE SHUT THE CONDITION IS NOT AS SEVERE AS…	Unknown	Unknown
https://www.accessdata.fda.gov/scripts/cdrh/cfdocs/cfMAUDE/Detail.CFM?MDRFOI__ID=9772182&pc=MTA	2023826-2020-00374	2019-12-06 05:00:00	Injury	STAAR SURGICAL COMPANY	2020-02-28 05:00:00	MTA	IMPLANTABLE COLLAMER LENS (ICL)	Off-Label Use; Adverse Event Without Identified Device or Use Problem	Dry Eye(s); Intraocular Pressure Increased; Pain; No Code Available	P030016	NA	1	Event Description: THE REPORTER INDICATED THE SURGEON IMPLANTED A 12.6MM MICL12.6 IMPLANTABLE COLLAMER LENS, - 11.5 DIOPTER, IN THE PATIENTS RIGHT EYE (OD), ON (B)(6) 2019. AT ONE-DAY POST-OP, THE PATIENT REPORTED EYE PAIN, WHICH WAS NOT RESOLVED WITH ARTIFICIAL TEARS OR WARM COMPRESSES. THE PATIENT GOT A SECOND OPINION BUT WAS UNABLE TO SOLVE THE SOURCE OF THE PAIN. THE PATIENT REQUESTED THE LEN…	Lens Extraction + Secondary Operation	Not_Resolved
https://www.accessdata.fda.gov/scripts/cdrh/cfdocs/cfMAUDE/Detail.CFM?MDRFOI__ID=9772179&pc=MTA	2023826-2020-00375	2020-02-06 05:00:00	Injury	STAAR SURGICAL COMPANY	2020-02-28 05:00:00	MTA	IMPLANTABLE COLLAMER LENS (ICL)	Off-Label Use; Adverse Event Without Identified Device or Use Problem	Dry Eye(s); Intraocular Pressure Increased; Pain; No Code Available	P030016	NA	1	Event Description: THE REPORTER INDICATED THE SURGEON IMPLANTED A 12.6MM MICL12.6 IMPLANTABLE COLLAMER LENS, - 11.0 DIOPTER, IN THE PATIENTS LEFT EYE (OS), ON (B)(6) 2019. THE PATIENT REPORTED EYE PAIN, WHICH WAS NOT RESOLVED WITH ARTIFICIAL TEARS OR WARM COMPRESSES. THE PATIENT GOT A SECOND OPINION BUT WAS UNABLE TO SOLVE THE SOURCE OF THE PAIN. THE PATIENT REQUESTED THE LENS BE REMOVED AND THE …	Lens Extraction + Secondary Operation	Not_Resolved
https://www.accessdata.fda.gov/scripts/cdrh/cfdocs/cfMAUDE/Detail.CFM?MDRFOI__ID=9483580&pc=MTA	2023826-2019-02411	2019-11-14 05:00:00	Injury	STAAR SURGICAL COMPANY	2019-12-17 05:00:00	MTA	IMPLANTABLE COLLAMER LENS (ICL)	Adverse Event Without Identified Device or Use Problem	Endophthalmitis; Headache; Pain; Red Eye(s); No Code Available	N/A	NA	1	Event Description: THE REPORTER INDICATED THAT THE SURGEON IMPLANTED A 13.2MM VICMO 13.2, -07.00 DIOPTER, IMPLANTABLE COLLAMER LENS INTO THE PATIENT'S LEFT EYE (OS) ON (B)(6) 2019. REPORTEDLY, PATIENT "HAD RED LEFT EYE WITH PAIN AND HEADACHES. SLIT LAMP EXAMINATION SHOWED EXUDATION OF ANTERIOR CHAMBER, THE SURGEON WASHED THE ANTERIOR CHAMBER AND REMOVED THE LENS ON (B)(6) 2019. AN ANTI-INFLAMMATO…	Lens Extraction	Resolved
https://www.accessdata.fda.gov/scripts/cdrh/cfdocs/cfMAUDE/Detail.CFM?MDRFOI__ID=7853704&pc=MTA	2023826-2018-01352	2018-08-08 04:00:00	Injury	STAAR SURGICAL COMPANY	2018-09-06 04:00:00	MTA	IMPLANTABLE COLLAMER LENS (ICL)	Adverse Event Without Identified Device or Use Problem	Endophthalmitis; Hypopyon; Inflammation; Intraocular Pressure Increased; Pain; Red Eye(s); Blurred Vision; Vitritis; No Code Available	NA	NA	1	Event Description: THE REPORTER INDICATED THAT A 13.2MM VICMO13.2, -13.0 DIOPTER, IMPLANTABLE COLLAMER LENS WAS IMPLANTED ON (B)(6) 2018 AND OBSERVED TO HAVE INTRAOCULAR INFLAMMATION AND VITRITIS 1 DAY POST-OP. UPON EXAMINATION, THE SURGEON " FOUND REACTION AND MEMBRANES IN AC" AND "WAS OBLIGATED TO KEEP PATIENT INSIDE THE HOSPITAL". THE PATIENT "UNDERGOES INTRA-VITREAL ANTIBIOTIC INJECTION" AND …	Lens Extraction	Resolved
https://www.accessdata.fda.gov/scripts/cdrh/cfdocs/cfMAUDE/Detail.CFM?MDRFOI__ID=7356138&pc=MTA	2023826-2018-00439	2018-02-21	Injury	STAAR SURGICAL COMPANY	2018-03-20	MTA	IMPLANTABLE COLLAMER LENS (ICL)	Device Operates Differently Than Expected	Endophthalmitis; Intraocular Infection; Intraocular Pressure, Delayed, Uncontrolled; Iritis; No Code Available	P030016	NA	1	Event Description: THE REPORTER INDICATED THAT THE SURGEON IMPLANTED A 12.6MM MICL12.6 IMPLANTABLE COLLAMER LENS, -12.0 DIOPTER, INTO THE PATIENT'S LEFT EYE (OS) ON (B)(6) 2018. ON (B)(6) 2018 THE LENS WAS EXPLANTED. THE SURGEON NOTES ACUTE ENDOPHTHALMITIS WITH ACUTE IRITIS. REPORTEDLY, THE PATIENT HAS BEEN TREATED WITH AN INTRAOCULAR INJECTION AND TOPICAL DROPS INCLUDING ANTIBIOTICS. THE CLAIM R…	Lens Extraction	Unknown
https://www.accessdata.fda.gov/scripts/cdrh/cfdocs/cfMAUDE/Detail.CFM?MDRFOI__ID=5826223&pc=MTA	2023826-2016-00987	2016-06-24	Injury	STAAR SURGICAL COMPANY	2016-07-27	MTA	ICL (IMPLANTABLE COLLAMER LENS)	Inadequacy of Device Shape and/or Size; Appropriate Term/Code Not Available	Endophthalmitis; Intraocular Pressure Increased; Blurred Vision; No Code Available	N/A	NA	1	Event Description: THE REPORTER INDICATED THAT THE SURGEON IMPLANTED A 12.6MM VICMO12.6 IMPLANTABLE COLLAMER LENS, -9.0 DIOPTER, IN THE PATIENT'S RIGHT EYE (OD) ON (B)(6) 2016. THE LENS WAS REPORTED AS HAVING A LOW VAULT AND REMAINS IMPLANTED. THE PATIENT EXPERIENCED AN ELEVATED IOP, SUSPECTED ENDOPHTHALMITIS, PIGMENT DISPERSION, AND BLURRED VISION._x000D_ Manufacturer Narrative: ADDITIONAL INFOR…	Lens Exchange	Resolved
https://www.accessdata.fda.gov/scripts/cdrh/cfdocs/cfMAUDE/Detail.CFM?MDRFOI__ID=9278780&pc=MTA	2023826-2019-02089	2019-10-07 04:00:00	Injury	STAAR SURGICAL COMPANY	2019-11-05 05:00:00	MTA	IMPLANTABLE COLLAMER LENS (ICL)	Adverse Event Without Identified Device or Use Problem	Endophthalmitis; Intraocular Pressure Increased; Visual Disturbances; No Code Available	N/A	NA	1	Event Description: THE REPORTER INDICATED THAT THE SURGEON IMPLANTED A 12.6 MM VICM5_12.6, -11.50 DIOPTER, IMPLANTABLE COLLAMER LENS IN THE PATIENT'S RIGHT EYE (OD) ON (B)(6) 2019. ENDOPHTHALMITIS WAS OBSERVED ON (B)(6) 2019. ELEVATED IOP (29.5 MMHG) WAS ASSESSED ON (B)(6) 2019. TREATMENT OF STEROID, PREDONIN, DIAMOX, EYE DROPS, AND INTERNAL MEDICINE. THE LENS REMAINS IMPLANTED. CAUSE OF THE EVEN…	Lens Retention	Resolved
https://www.accessdata.fda.gov/scripts/cdrh/cfdocs/cfMAUDE/Detail.CFM?MDRFOI__ID=18048066&pc=MTA	2023826-2023-04715	2023-07-11	Injury	STAAR SURGICAL COMPANY	2023-11-01	MTA	IMPLANTABLE COLLAMER LENS (ICL)	Off-Label Use; Patient-Device Incompatibility	Eye Pain	P030016	NA	1	Event Description: THE REPORTER INDICATED THAT THE SURGEON IMPLANTED A 12.6MM VICMO12.6, -10.50 DIOPTER, IMPLANTABLE COLLAMER LENS INTO THE PATIENT'S LEFT EYE (OS) ON (B)(6) 2023. LENS WAS EXPLANTED ON (B)(6) 2023 DUE TO ORBITAL PAIN DUE TO PATIENT PSYCHOLOGICAL EFFECTS. THIS RESOLVED THE PROBLEM. CAUSE OF THE EVENT IS REPORTED AS PATIENT RELATED FACTOR: PSYCHOLOGICAL EFFECTS. REPORTEDLY, PATIENT…	Lens Extraction	Resolved
https://www.accessdata.fda.gov/scripts/cdrh/cfdocs/cfMAUDE/Detail.CFM?MDRFOI__ID=18048064&pc=MTA	2023826-2023-04714	2023-07-18	Injury	STAAR SURGICAL COMPANY	2023-11-01	MTA	IMPLANTABLE COLLAMER LENS (ICL)	Off-Label Use; Patient-Device Incompatibility	Eye Pain	P030016	NA	1	Event Description: THE REPORTER INDICATED THAT THE SURGEON IMPLANTED A 12.6MM VICMO12.6, -10.50 DIOPTER, IMPLANTABLE COLLAMER LENS INTO THE PATIENT'S RIGHT EYE (OD) ON (B)(6) 2023. LENS WAS EXPLANTED ON (B)(6) 2023 DUE TO ORBITAL PAIN DUE TO PATIENT PSYCHOLOGICAL EFFECTS. THIS RESOLVED THE PROBLEM. CAUSE OF THE EVENT IS REPORTED AS PATIENT RELATED FACTOR: PSYCHOLOGICAL EFFECTS. REPORTEDLY, PATIEN…	Lens Extraction	Resolved
https://www.accessdata.fda.gov/scripts/cdrh/cfdocs/cfMAUDE/Detail.CFM?MDRFOI__ID=10529812&pc=MTA	2023826-2020-02074	2020-08-17	Injury	STAAR SURGICAL COMPANY	2020-09-14	MTA	IMPLANTABLE COLLAMER LENS (ICL)	Inadequacy of Device Shape and/or Size	Eye Pain; Appropriate Clinical Signs, Symptoms, Conditions Term / Code Not Available	NA#S-P#NA	NA	1	Event Description: THE REPORTER INDICATED THE SURGEON IMPLANTED A 13.7MM VICMO13.7 IMPLANTABLE COLLAMER LENS, -12.50 DIOPTER, IN THE PATIENTS LEFT EYE (OS) ON (B)(6) 2020. THE LENS WAS REPORTED AS EXCESSIVE VAULTING AND ANGLE CLOSURE. A NEW PERIPHERAL IRIDOTOMY WAS ADDED (LASER) BUT NOTHING CHANGED. THE CAUSE OF THE EVENT WAS UNKNOWN. THE LENS REMAINS IMPLANTED. THE PATIENT IS SEEING WELL BUT EYE…	Lens Retention + Secondary Operation	Not_Resolved
https://www.accessdata.fda.gov/scripts/cdrh/cfdocs/cfMAUDE/Detail.CFM?MDRFOI__ID=14046187&pc=MTA	2023826-2022-01093	2022-03-12 05:00:00	Malfunction	STAAR SURGICAL COMPANY	2022-04-07 04:00:00	MTA	IMPLANTABLE COLLAMER LENS (ICL)	Off-Label Use; Adverse Event Without Identified Device or Use Problem	Fatigue; Headache; Inflammation; Intraocular Pressure Increased; Eye Pain; Appropriate Clinical Signs, Symptoms, Conditions Term / Code Not Available	NA	NA	1	Event Description: THE REPORTER INDICATED THE SURGEON IMPLANTED A 12.1MM VICM5_12.1 IMPLANTABLE COLLAMER LENS, -08.00 DIOPTER, IN THE PATIENTS LEFT EYE (OS), ON (B)(6) 2021. THE PATIENT EXPERIENCED ELEVATED INTRAOCULAR PRESSURE (IOP) AND AC INFLAMMATION CELLS. THE LENS REMAINED IMPLANTED. THE CAUSE OF THE EVENT WAS UNKNOWN. ADDITIONAL INFORMATION HAS BEEN REQUESTED BUT NONE HAS BEEN FORTHCOMING. …	Lens Retention	Unknown
https://www.accessdata.fda.gov/scripts/cdrh/cfdocs/cfMAUDE/Detail.CFM?MDRFOI__ID=6487472&pc=MTA	2023826-2017-00620	NA	Injury	STAAR SURGICAL COMPANY	2017-04-12	MTA	IMPLANTABLE COLLAMER LENS (ICL)	Inadequacy of Device Shape and/or Size	Foreign Body Sensation in Eye; Pain	P030016	NA	1	Event Description: THE REPORTER INDICATED THE SURGEON IMPLANTED A 13.2MM MICL13.2 IMPLANTABLE COLLAMER LENS, -5.0 DIOPTER, IN THE PATIENT'S LEFT EYE (OS) ON (B)(6) 2017. THE PATIENT REPORTED HAD SEVERE PAIN BEHIND THE EYE AND FOREIGN BODY SENSATION. THE LENS REMAINS IMPLANTED BUT THE PLAN IS TO EXPLANT AND EXCHANGE FOR A SHORTER LENS. Manufacturer Narrative: (B)(4). WORK ORDER SEARCH: NO SIMILAR …	Unknown	Unknown
https://www.accessdata.fda.gov/scripts/cdrh/cfdocs/cfMAUDE/Detail.CFM?MDRFOI__ID=10590903&pc=MTA	2023826-2020-02255	2020-05-09 04:00:00	Injury	STAAR SURGICAL COMPANY	2020-09-26 04:00:00	MTA	IMPLANTABLE COLLAMER LENS (ICL)	Adverse Event Without Identified Device or Use Problem	Foreign Body Sensation in Eye; Visual Disturbances; Eye Pain	NA	NA	1	Event Description: THE REPORTER INDICATED THAT A 12.6 MM, VICMO12.6, -6.50 DIOPTER, IMPLANTABLE COLLAMER LENS WAS IMPLANTED INTO THE PATIENTS RIGHT EYE (OD) ON (B)(6) 2020. ON (B)(6) 2020 THE LENS WAS EXPLANTED, IT WAS REPORTED THAT AFTER LENS IMPLANT THE PATIENT EXPERIENCE FOREIGN BODY SENSATION, PAIN AND DOUBLE IMAGES AND REQUIRED REMOVAL. LENS EXPLANT RESOLVED THE PROBLEM. PATIENT RELATED FACT…	Lens Extraction	Resolved
https://www.accessdata.fda.gov/scripts/cdrh/cfdocs/cfMAUDE/Detail.CFM?MDRFOI__ID=10590933&pc=MTA	2023826-2020-02256	2020-05-09 04:00:00	Injury	STAAR SURGICAL COMPANY	2020-09-26 04:00:00	MTA	IMPLANTABLE COLLAMER LENS (ICL)	Adverse Event Without Identified Device or Use Problem	Foreign Body Sensation in Eye; Visual Disturbances; Eye Pain	NA	NA	1	Event Description: THE REPORTER INDICATED THAT A 12.6 MM, VICMO12.6, -6.50 DIOPTER, IMPLANTABLE COLLAMER LENS WAS IMPLANTED INTO THE PATIENTS LEFT EYE (OS) ON (B)(6) 2020. ON (B)(6) 2020 THE LENS WAS EXPLANTED, IT WAS REPORTED THAT AFTER LENS IMPLANT THE PATIENT EXPERIENCE FOREIGN BODY SENSATION, PAIN AND DOUBLE IMAGES AND REQUIRED REMOVAL. LENS EXPALNT RESOLVED THE PROBLEM. PATIENT RELATED FACTO…	Lens Extraction	Resolved
https://www.accessdata.fda.gov/scripts/cdrh/cfdocs/cfMAUDE/Detail.CFM?MDRFOI__ID=16230473&pc=MTA	2023826-2023-00271	NA	Injury	STAAR SURGICAL COMPANY	2023-01-23 05:00:00	MTA	IMPLANTABLE COLLAMER LENS (ICL)	Inadequacy of Device Shape and/or Size	Glaucoma	P030016	NA	1	Event Description: THE REPORTER INDICATED THAT THE SURGEON IMPLANTED A 12.6MM VICMO12.6; -13 DIOPTER IMPLANTABLE COLLAMER LENS INTO THE PATIENT'S LEFT EYE (OS) ON (B)(6) 2022. THE PATIENT EXPERIENCED EXCESSIVE VAULTING AND GLAUCOMA. ON (B)(6) 2022 THE LENS WAS EXPLANTED. ON (B)(6) 2022 A REPLACEMENT LENS OF SHORTER LENGTH WAS IMPLANTED AND THIS RESOLVED THE PROBLEM. THE CAUSE OF THE EVENT WAS REP…	Lens Exchange	Resolved
https://www.accessdata.fda.gov/scripts/cdrh/cfdocs/cfMAUDE/Detail.CFM?MDRFOI__ID=16230029&pc=MTA	2023826-2023-00272	NA	Injury	STAAR SURGICAL COMPANY	2023-01-23 05:00:00	MTA	IMPLANTABLE COLLAMER LENS (ICL)	Off-Label Use; Inadequacy of Device Shape and/or Size	Glaucoma	P030016	NA	1	Event Description: THE REPORTER INDICATED THAT THE SURGEON IMPLANTED A 12.6MM VICMO12.6; -12.5 DIOPTER IMPLANTABLE COLLAMER LENS INTO THE PATIENT'S LEFT EYE (OS) ON (B)(6) 2022 . THE PATIENT EXPERIENCED EXCESSIVE VAULTING AND GLAUCOMA. ON (B)(6) 2022 THE LENS WAS EXPLANTED; ON THIS SAME DATE A REPLACEMENT LENS OF SHORTER LENGTH WAS IMPLANTED AND THIS RESOLVED THE PROBLEM. THE CAUSE OF THE EVENT W…	Lens Exchange	Resolved
https://www.accessdata.fda.gov/scripts/cdrh/cfdocs/cfMAUDE/Detail.CFM?MDRFOI__ID=16048692&pc=MTA	2023826-2022-04678	NA	Injury	STAAR SURGICAL COMPANY	2022-12-26 05:00:00	MTA	IMPLANTABLE COLLAMER LENS (ICL)	Misfocusing; No Apparent Adverse Event	Glaucoma; Blurred Vision; No Clinical Signs, Symptoms or Conditions	P030016	NA	1	Event Description: THE REPORTER INDICATED THE SURGEON IMPLANTED AN ICL IMPLANTABLE COLLAMER LENS, IN THE PATIENTS LEFT EYE (OS). THE PATIENT REPORTED EYE PROBLEMS AND POSSIBLE LOSS OF VISION. THE LENS REMAINED IMPLANTED. ADDITIONAL INFORMATION HAS BEEN REQUESTED BUT NONE HAS BEEN FORTHCOMING. Manufacturer Narrative: ADDITIONAL INFORMATION: B5: A 12.6MM VICM512.6 IMPLANTABLE COLLAMER LENS OF A -12…	Lens Retention	Resolved
https://www.accessdata.fda.gov/scripts/cdrh/cfdocs/cfMAUDE/Detail.CFM?MDRFOI__ID=13417556&pc=MTA	2023826-2022-00338	2022-01-04	Injury	STAAR SURGICAL COMPANY	2022-02-01	MTA	IMPLANTABLE COLLAMER LENS (ICL)	Inadequacy of Device Shape and/or Size; Device Dislodged or Dislocated	Glaucoma; Eye Pain	P030016	NA	1	Event Description: THE REPORTER INDICATED THAT THE SURGEON IMPLANTED A 12.6MM MICL12.6 IMPLANTABLE COLLAMER LENS, -12.5 DIOPTER INTO THE PATIENT'S LEFT (OS) EYE ON (B)(6) 2021. ON (B)(6) 2022 THE LENS WAS EXPLANTED DUE TO LOW VAULT, LENS ROTATION, PAIN, AND GLAUCOMA. THE PROBLEM IS RESOLVED. Manufacturer Narrative: (B)(4).	Lens Extraction	Resolved
https://www.accessdata.fda.gov/scripts/cdrh/cfdocs/cfMAUDE/Detail.CFM?MDRFOI__ID=4743980&pc=MTA	2023826-2015-00510	NA	Injury	STAAR SURGICAL COMPANY	2015-05-01	MTA	ICL (IMPLANTABLE COLLAMER LENS)	Appropriate Term/Code Not Available	Glaucoma; Intraocular Pressure Increased	P030016	NA	1	Event Description: THE PATIENT REPORTED THE SURGEON IMPLANTED A 13.2MM MICL13.2 IMPLANTABLE COLLAMER LENS IN HER RIGHT EYE (OD). THE PATIENT REPORTED WAS PRESCRIBED EYE DROPS FOR AT LEAST THREE CONSECUTIVE MONTHS FOR HIGH PRESSURE OR GLAUCOMA INSIDE THE EYE. THE LENS WAS IMPLANTED ON (B)(6) 2012. THE FACILITY INDICATED THEY AGREED WITH THE PATIENT REPORT. THE PATIENT HAD HIGH PRESSURE (11 - 36MM …	Lens Retention	Unknown
https://www.accessdata.fda.gov/scripts/cdrh/cfdocs/cfMAUDE/Detail.CFM?MDRFOI__ID=4743982&pc=MTA	2023826-2015-00509	NA	Injury	STAAR SURGICAL COMPANY	2015-05-01	MTA	ICL (IMPLANTABLE COLLAMER LENS)	Appropriate Term/Code Not Available	Glaucoma; Intraocular Pressure Increased	P030016	NA	1	Event Description: THE PATIENT REPORTED THE SURGEON IMPLANTED A 13.2MM MICL13.2 IMPLANTABLE COLLAMER LENS IN HER LEFT EYE (OS). THE PATIENT REPORTED WAS PRESCRIBED EYE DROPS FOR AT LEAST THREE CONSECUTIVE MONTHS FOR HIGH PRESSURE OR GLAUCOMA INSIDE THE EYE. THE LENS WAS IMPLANTED ON (B)(6) 2012. THE FACILITY INDICATED THEY AGREED WITH THE PATIENT REPORT. THE PATIENT HAD HIGH PRESSURE (10 - 21MM H…	Lens Retention	Unknown
https://www.accessdata.fda.gov/scripts/cdrh/cfdocs/cfMAUDE/Detail.CFM?MDRFOI__ID=4513709&pc=MTA	2023826-2015-00142	NA	Injury	STAAR SURGICAL COMPANY	2015-02-12	MTA	VISIAN ICL (IMPLANTABLE COLLAMER LENS)	Insufficient Information	Glaucoma; Intraocular Pressure Increased	P030016	NA	1	Event Description: THE PATIENT REPORTED THE SURGEON IMPLANTED A 12.6MM MICL12.6 IMPLANTABLE COLLAMER LENS IN HIS LEFT EYE (OS). THE PATIENT REPORTED WAS PRESCRIBED EYE DROPS FOR AT LEAST THREE CONSECUTIVE MONTHS DUE TO HIGH PRESSURE OR GLAUCOMA INSIDE THE EYE. THE ICL WAS IMPLANTED ON (B)(6) 2011 AND REMAINS IMPLANTED. ADDITIONAL INFORMATION HAS BEEN REQUESTED BUT NONE HAS BEEN FORTHCOMING. IF AD…	Lens Retention	Unknown
https://www.accessdata.fda.gov/scripts/cdrh/cfdocs/cfMAUDE/Detail.CFM?MDRFOI__ID=16326950&pc=MTA	2023826-2023-00266	2022-11-02	Injury	STAAR SURGICAL COMPANY	2023-02-08	MTA	IMPLANTABLE COLLAMER LENS (ICL)	Inadequacy of Device Shape and/or Size; Adverse Event Without Identified Device or Use Problem	Glaucoma; Intraocular Pressure Increased; No Clinical Signs, Symptoms or Conditions	P030016	NA	1	Event Description: THE REPORTER INDICATED THE SURGEON IMPLANTED A 12.6MM VICMO12.6 IMPLANTABLE COLLAMER LENS, -18.00 DIOPTER, INTO THE PATIENTS RIGHT EYE (OD) ON(B)(6)2022. THE LENS WAS REPORTED AS LOW VAULTING AND REMAINED IMPLANTED. THIS WAS THE REPLACEMENT LENS FOR MFR. REPORT # 2023826-2023-00265. THE CAUSE OF THE EVENT WAS UNKNOWN. ADDITIONAL INFORMATION HAS BEEN REQUESTED BUT NONE HAS BEEN …	Lens Extraction + Secondary Operation	Resolved
https://www.accessdata.fda.gov/scripts/cdrh/cfdocs/cfMAUDE/Detail.CFM?MDRFOI__ID=6855474&pc=MTA	2023826-2017-01419	2016-09-30	Injury	STAAR SURGICAL COMPANY	2017-09-11	MTA	IMPLANTABLE COLLAMER LENS (ICL)	Device Operates Differently Than Expected	Glaucoma; Intraocular Pressure Increased; No Code Available	N/A	NA	1	Event Description: THE REPORTER INDICATED THAT THE SURGEON IMPLANTED A 13.7 MM VICMO13.7, -8.5 DIOPTER, IMPLANTABLE COLLAMER LENS IN THE PATIENT'S RIGHT EYE (OD) ON (B)(6)2014. ON (B)(6) 2017, THE LENS WAS EXPLANTED DUE TO ELEVATED IOP, PIGMENT DISPERSION, AND MILD VISUAL FIELD LOSS. SMALL SIGNS OF PIGMENT DISPERSION WAS SEEN AT PREOP EXAM, BUT (CONSIDERING DEVELOPMENT) WAS MIS-ASSESSED. SURGICAL…	Lens Extraction + Secondary Operation	Resolved
https://www.accessdata.fda.gov/scripts/cdrh/cfdocs/cfMAUDE/Detail.CFM?MDRFOI__ID=6054107&pc=MTA	2023826-2016-01522	2016-10-10	Injury	STAAR SURGICAL COMPANY	2016-10-25	MTA	ICL (IMPLANTABLE COLLAMER LENS)	Inadequacy of Device Shape and/or Size	Glaucoma; Intraocular Pressure Increased; No Code Available	P030016	NA	1	Event Description: THE REPORTER STATED THAT THE SURGEON IMPLANTED A 12.6MM MICL12.6 LENS, -3.50 DIOPTER, IN THE PATIENT'S RIGHT EYE ON (B)(6) 2016. FOLLOWING THE SURGERY, THE PATIENT EXPERIENCED NARROWING OF THE ANGLE AND SHALLOWING OF THE ACD. ON (B)(6) 2016, THE PATIENT HAD ELEVATED INTRAOCULAR PRESSURE (IOP) AND CLOSED ANGLE GLAUCOMA DUE TO EXCESSIVE VAULTING OF THE LENS. THE PATIENT RECEIVED …	Lens Exchange + Secondary Operation	Unknown
https://www.accessdata.fda.gov/scripts/cdrh/cfdocs/cfMAUDE/Detail.CFM?MDRFOI__ID=8547014&pc=MTA	2023826-2019-00667	2018-06-20	Injury	STAAR SURGICAL COMPANY	2019-04-24	MTA	IMPLANTABLE COLLAMER LENS (ICL)	Off-Label Use; Inadequacy of Device Shape and/or Size	Glaucoma; Intraocular Pressure Increased; No Code Available	N/A	NA	1	Event Description: THE REPORTER INDICATED 12.1MM, VTICM5_12.1,-12.50 DIOPTER, IMPLANTABLE COLLAMER LENS WAS IMPLANTED INTO THE PATIENTS RIGHT EYE (OD) ON (B)(6) 2018. ON (B)(6) 2019 THE LENS WAS EXPLANTED DUE TO EXCESSIVE VAULT, ELEVATED IOP, SIGNIFICANT REDUCTION OF IRIDO-CORNEAL ANGLES, PIGMENT DISPERSION, BLURRED VISION AND IRIS ASTROPHY. PHACO-EMULSIFICATION AND GLAUCOMA FILTRATION SURGERY WE…	Lens Exchange + Secondary Operation	Resolved
https://www.accessdata.fda.gov/scripts/cdrh/cfdocs/cfMAUDE/Detail.CFM?MDRFOI__ID=9703234&pc=MTA	2023826-2020-00267	2020-01-13	Injury	STAAR SURGICAL COMPANY	2020-02-12	MTA	IMPLANTABLE COLLAMER LENS (ICL)	Off-Label Use; Patient-Device Incompatibility	Glaucoma; Intraocular Pressure Increased; No Code Available	NA	NA	1	Event Description: THE REPORTER INDICATED THE SURGEON IMPLANTED A 13.2MM VICM5_13.2 IMPLANTABLE COLLAMER LENS, -01.75 DIOPTER, IN THE PATIENT'S RIGHT EYE (OD), ON (B)(6) 2019. THE LENS WAS EXPLANTED ON (B)(6) 2020 DUE TO ELEVATED INTRAOCULAR PRESSURE (IOP), PIGMENT DISPERSION AND UNREACTIVE (FIXED) PUPIL. THE SURGEON DECIDED NOT TO IMPLANT ANOTHER LENS. THE CAUSE OF THE EVENT WAS DUE TO PATIENT R…	Lens Extraction	Unknown
https://www.accessdata.fda.gov/scripts/cdrh/cfdocs/cfMAUDE/Detail.CFM?MDRFOI__ID=6262587&pc=MTA	2023826-2017-00092	2015-10-15	Injury	STAAR SURGICAL COMPANY	2017-01-18	MTA	ICL (IMPLANTABLE COLLAMER LENS)	Adverse Event Without Identified Device or Use Problem	Glaucoma; Intraocular Pressure, Delayed, Uncontrolled; No Code Available	P030016	NA	1	Event Description: THE REPORTER INDICATED THE SURGEON IMPLANTED A 12.6MM MICL12.6 IMPLANTABLE COLLAMER LENS, -13.0 DIOPTER, IN THE PATIENT'S RIGHT EYE (OD) ON (B)(6) 2015. THE LENS WAS EXPLANTED ON (B)(6) 2016 DUE TO COMBINED MECHANISM GLAUCOMA. THE INCREASED INTRAOCULAR PRESSURE WAS NOT CAUSED BY THE ICL BUT WAS DUE TO AN UNKNOWN SICKLE CELL TRAIT AND YAG PI. THE PATIENT HAD REFRACTIVE LENS EXCH…	Lens Exchange + Secondary Operation	Unknown
https://www.accessdata.fda.gov/scripts/cdrh/cfdocs/cfMAUDE/Detail.CFM?MDRFOI__ID=8799310&pc=MTA	2023826-2019-01274	NA	Injury	STAAR SURGICAL COMPANY	2019-07-17 04:00:00	MTA	IMPLANTABLE COLLAMER LENS (ICL)	Adverse Event Without Identified Device or Use Problem	Glaucoma; No Code Available	P030016	NA	1	Event Description: THE REPORTER INDICATED THAT A 13.2MM, MICL13.2, -13.0 DIOPTER, IMPLANTABLE COLLAMER LENS WAS EXPLANTED FROM THE PATIENTS RIGHT EYE (OD) ON (B)(6) 2019 DUE TO GLAUCOMA. ADDITIONAL INFORMATION HAS BEEN REQUESTED BUT NONE HAS BEEN FORTHCOMING. IF ADDITIONAL INFORMATION IS RECEIVED A SUPPLEMENTAL MEDWATCH REPORT WILL BE SUBMITTED. Manufacturer Narrative: (B)(4). CLAIM#: (B)(4). Man…	Lens Extraction	Unknown
https://www.accessdata.fda.gov/scripts/cdrh/cfdocs/cfMAUDE/Detail.CFM?MDRFOI__ID=8799452&pc=MTA	2023826-2019-01273	NA	Injury	STAAR SURGICAL COMPANY	2019-07-17 04:00:00	MTA	IMPLANTABLE COLLAMER LENS (ICL)	Adverse Event Without Identified Device or Use Problem	Glaucoma; No Code Available	P030016	NA	1	Event Description: THE REPORTER INDICATED THAT A 13.2 MM, MICL13.2, -13.5 DIOPTER, IMPLANTABLE COLLAMER LENS WAS EXPLANTED FROM THE PATIENTS LEFT EYE (OS) ON (B)(6) 2019 DUE TO GLAUCOMA. ADDITIONAL INFORMATION HAS BEEN REQUESTED BUT NONE HAS BEEN FORTHCOMING. IF ADDITIONAL INFORMATION IS RECEIVED A SUPPLEMENTAL MEDWATCH REPORT WILL BE SUBMITTED. Manufacturer Narrative: RETURN DATE SHOULD BE CORRE…	Lens Extraction	Unknown
https://www.accessdata.fda.gov/scripts/cdrh/cfdocs/cfMAUDE/Detail.CFM?MDRFOI__ID=5193790&pc=MTA	2023826-2015-01396	NA	Injury	STAAR SURGICAL COMPANY	2015-11-01	MTA	ICL (IMPLANTABLE COLLAMER LENS)	Appropriate Term/Code Not Available	Glaucoma; No Code Available	P030016	NA	1	Event Description: THE REPORTER INDICATED THE SURGEON IMPLANTED A 13.2MM MICL13.2 IMPLANTABLE COLLAMER LENS, -9.0 DIOPTER, IN THE PATIENT'S EYE ON (B)(6) 2015. THE LENS WAS EXPLANTED ON (B)(6) 2015 DUE TO ANGLE CLOSURE GLAUCOMA. ADDITIONAL INFORMATION HAS BEEN REQUESTED BUT NONE HAS BEEN FORTHCOMING. IF ADDITIONAL INFORMATION IS RECEIVED, A SUPPLEMENTAL MEDWATCH REPORT WILL BE SUBMITTED. Manufact…	Lens Extraction	Resolved
https://www.accessdata.fda.gov/scripts/cdrh/cfdocs/cfMAUDE/Detail.CFM?MDRFOI__ID=8372539&pc=MTA	2023826-2019-00285	2018-07-16	Injury	STAAR SURGICAL COMPANY	2019-02-26	MTA	IMPLANTABLE COLLAMER LENS (ICL)	Off-Label Use; Inadequacy of Device Shape and/or Size	Glaucoma; No Code Available	P030016	NA	1	Event Description: THE REPORTER INDICATED THAT THE SURGEON IMPLANTED A 13.7MM MICL13.7 IMPLANTABLE COLLAMER LENS, -14.5 DIOPTER, INTO THE PATIENT'S RIGHT (OD) EYE ON (B)(6) 2018. ON (B)(6) 2019 THE SURGEON EXCHANGED THE LENS WITH A SHORTER LENS DUE TO EXCESSIVE VAULT, ANGLE CLOSURE, SIGNIFICANT REDUCTION OF IRIDO-CORNEAL ANGLES (ICA), AND GLAUCOMA. THE PROBLEM IS RESOLVED. THE CAUSE OF THE EVENT …	Lens Exchange	Resolved
https://www.accessdata.fda.gov/scripts/cdrh/cfdocs/cfMAUDE/Detail.CFM?MDRFOI__ID=9244518&pc=MTA	2023826-2019-01974	2019-10-01	Injury	STAAR SURGICAL COMPANY	2019-10-28	MTA	IMPLANTABLE COLLAMER LENS (ICL)	Off-Label Use; Inadequacy of Device Shape and/or Size; Adverse Event Without Identified Device or Use Problem	Glaucoma; No Code Available	N/A	NA	1	Event Description: THE REPORTER INDICATED THAT THE SURGEON IMPLANTED A 12.6MM VICM5_12.6, -02.00 DIOPTER, IMPLANTABLE COLLAMER LENS INTO THE PATIENT'S RIGHT EYE (OD) ON (B)(6) 2017. REPORTEDLY, CELL COUNT DECREASE AND ACUTE GLAUCOMA WERE OBSERVED. PER THE REPORTER ON (B)(6) 2019, LENS WAS REMOVED AND EXCHANGED. ADDITIONAL INFORMATION HAS BEEN REQUESTED BUT NONE HAS BEEN FORTHCOMING. IF ADDITIONAL…	Lens Exchange + Secondary Operation	Resolved
https://www.accessdata.fda.gov/scripts/cdrh/cfdocs/cfMAUDE/Detail.CFM?MDRFOI__ID=12168068&pc=MTA	2023826-2021-02624	2021-03-05	Injury	STAAR SURGICAL COMPANY	2021-07-14	MTA	IMPLANTABLE COLLAMER LENS (ICL)	Adverse Event Without Identified Device or Use Problem	Headache	NA	NA	1	Event Description: THE REPORTER INDICATED THAT A 12.6MM VICM5_12.6; -12.00 DIOPTER IMPLANTABLE COLLAMER LENS WAS IMPLANTED INTO THE PATIENT'S RIGHT EYE (OD) ON (B)(6) 2021. ON (B)(6) 2021 THE LENS WAS EXPLANTED DUE TO THE PATIENT EXPERIENCED HEADACHES. IT WAS NOTED THERE IS NO PLAN TO REPLACE THE LENS. THE PROBLEM WAS RESOLVED. Manufacturer Narrative: TYPE OF INVESTIGATION : LENS WORK ORDER SEARC…	Lens Extraction	Resolved
https://www.accessdata.fda.gov/scripts/cdrh/cfdocs/cfMAUDE/Detail.CFM?MDRFOI__ID=12170268&pc=MTA	2023826-2021-02625	2021-03-05	Injury	STAAR SURGICAL COMPANY	2021-07-14	MTA	IMPLANTABLE COLLAMER LENS (ICL)	Adverse Event Without Identified Device or Use Problem	Headache	NA	NA	1	Event Description: THE REPORTER INDICATED THAT A 12.6MM VICM5_12.6; -12.00 DIOPTER IMPLANTABLE COLLAMER LENS WAS IMPLANTED INTO THE PATIENT'S LEFT EYE (OS) ON (B)(6) 2021. ON (B)(6) 2021 THE LENS WAS EXPLANTED DUE TO THE PATIENT EXPERIENCED HEADACHES. IT WAS NOTED THERE IS NO PLAN TO REPLACE THE LENS. THE PROBLEM WAS RESOLVED. Manufacturer Narrative: TYPE OF INVESTIGATION - LENS WORK ORDER SEARCH…	Lens Extraction	Resolved
https://www.accessdata.fda.gov/scripts/cdrh/cfdocs/cfMAUDE/Detail.CFM?MDRFOI__ID=6997961&pc=MTA	2023826-2017-01639	NA	Injury	STAAR SURGICAL COMPANY	2017-11-02	MTA	IMPLANTABLE COLLAMER LENS (ICL)	Device Operates Differently Than Expected; Adverse Event Without Identified Device or Use Problem	Headache	P030016	NA	1	Event Description: THE PATIENT REPORTED THE SURGEON IMPLANTED A 12.6MM MICL12.6 IMPLANTABLE COLLAMER LENS, -6.0 DIOPTER, IN HER RIGHT EYE (OD). THE PATIENT REPORTED HAS EXPERIENCED "MIGRAINE AURA". THE LENS WAS IMPLANTED ON (B)(6) 2013 AND REMAINS IMPLANTED. THE PATIENT REPORTED THE EVENT STARTED IN (B)(6) 2017 AND OCCURS EVERY COUPLE OF WEEKS. THE DOCTOR'S OFFICE CONFIRMED THE EVENT AND INDICATE…	Lens Retention	Unknown
https://www.accessdata.fda.gov/scripts/cdrh/cfdocs/cfMAUDE/Detail.CFM?MDRFOI__ID=4957436&pc=MTA	2023826-2015-00990	2015-04-13	Injury	STAAR SURGICAL COMPANY AG	2015-07-31	MTA	VISIAN ICL (IMPLANTABLE COLLAMER LENS)	Appropriate Term/Code Not Available	Headache; Anxiety; No Code Available	NA	NA	1	Event Description: THE REPORTER INDICATED THE SURGEON INSERTED THE 13.2MM VICMO13.2 IMPLANTABLE COLLAMER LENS IN THE PATIENT'S RIGHT (OD) EYE ON (B)(6) 2014 AND ON (B)(6) 2015 THE PATIENT WAS EXPERIENCING HEADACHES, ANXIETY AND INSOMIA. THE LENS WAS EXPLANTED ON (B)(6) 2015 AND WAS NOT REPLACED. SEE MFR REPORT# 2023826-2015-00991 FOR THE OTHER EYE. Manufacturer Narrative: THIS PRODUCT IS MANUFACT…	Lens Extraction	Unknown
https://www.accessdata.fda.gov/scripts/cdrh/cfdocs/cfMAUDE/Detail.CFM?MDRFOI__ID=4957478&pc=MTA	2023826-2015-00991	2015-04-13	Injury	STAAR SURGICAL COMPANY AG	2015-07-31	MTA	VISIAN ICL (IMPLANTABLE COLLAMER LENS)	Appropriate Term/Code Not Available	Headache; Anxiety; No Code Available	NA	NA	1	Event Description: THE REPORTER INDICATED THE SURGEON INSERTED THE 13.2MM VICMO13.2 IMPLANTABLE COLLAMER LENS IN THE PATIENT'S LEFT (OS) EYE ON (B)(6) 2014 AND ON (B)(6) 2015 THE PATIENT WAS EXPERIENCING HEADACHES, ANXIETY AND INSOMNIA. THE LENS WAS EXPLANTED ON (B)(6) 2015 AND WAS NOT REPLACED. SEE MFR REPORT# 2023826-2015-00990 FOR THE OTHER EYE. Manufacturer Narrative: THIS PRODUCT IS MANUFACT…	Lens Extraction	Unknown
https://www.accessdata.fda.gov/scripts/cdrh/cfdocs/cfMAUDE/Detail.CFM?MDRFOI__ID=6560720&pc=MTA	2023826-2017-00791	NA	Injury	STAAR SURGICAL COMPANY	2017-05-11	MTA	IMPLANTABLE COLLAMER LENS (ICL)	Inadequacy of Device Shape and/or Size	Headache; Blurred Vision	NA	NA	1	Event Description: THE REPORTER INDICATED THE SURGEON IMPLANTED A 12.1 MM VICMO12.1 IMPLANTABLE COLLAMER LENS, -05.50 DIOPTER, IN THE PATIENT'S LEFT EYE (OS), ON (B)(6) 2016. THE REPORTER INDICATED THERE WAS OFF-TARGET REFRACTION (REFRACTIVE SURPRISE) AND LOW VAULTING WITH THE LENS. THE PATIENT WAS EXPERIENCING HEADACHES. THE LENS REMAINS IMPLANTED BUT WILL BE EXPLANTED AT A LATER DATE. Manufactu…	Lens Extraction	Unknown
https://www.accessdata.fda.gov/scripts/cdrh/cfdocs/cfMAUDE/Detail.CFM?MDRFOI__ID=11510275&pc=MTA	2023826-2021-00681	2021-01-11	Injury	STAAR SURGICAL COMPANY	2021-03-17	MTA	IMPLANTABLE COLLAMER LENS (ICL)	Misfocusing	Headache; Blurred Vision	NA	NA	1	Event Description: THE REPORTER INDICATED THAT A 12.1MM, VICM5_12.1, -6.50 DIOPTER, IMPLANTABLE COLLAMER LENS WAS IMPLANTED INTO THE PATIENTS LEFT EYE (OS) ON (B)(6) 2020. ON (B)(6) 2021 THE LENS WAS EXCHANGED FOR A DIFFERENT DIOPTER LENS DUE TO REFRACTIVE SURPRISE. THIS EXCHANGE RESOLVED THE PROBLEM. PATIENT RELATED FACTOR WAS REPORTED FOR CAUSE OF EVENT, THE REPORTER STATED "PATIENT EXPERIENCED…	Lens Exchange	Resolved
https://www.accessdata.fda.gov/scripts/cdrh/cfdocs/cfMAUDE/Detail.CFM?MDRFOI__ID=14440020&pc=MTA	2023826-2022-01618	2022-04-18	Injury	STAAR SURGICAL COMPANY	2022-05-19	MTA	IMPLANTABLE COLLAMER LENS (ICL)	Adverse Event Without Identified Device or Use Problem	Headache; Blurred Vision; Appropriate Clinical Signs, Symptoms, Conditions Term / Code Not Available	P030016	NA	1	Event Description: THE REPORTER INDICATED THAT A 12.6MM, MICL12.6, -9.0 DIOPTER IMPLANTABLE COLLAMER LENS WAS IMPLANTED INTO THE PATIENTS RIGHT EYE (OD) ON (B)(6) 2022. PIGMENT DISPERSION, FIXED PUPIL AND IRIS ATROPHY WAS OBSERVED. ON (B)(6) 2022 PI YAG WAS PERFORMED. LENS REMAINS IMPLANTED. FOR CAUSE DETAILS THE REPORTER STATED, "GOOD SURGICAL OUTCOME, HAPPY VISION, BUT HAS HAD EPISODES OF HEADA…	Lens Retention + Secondary Operation	Resolved
https://www.accessdata.fda.gov/scripts/cdrh/cfdocs/cfMAUDE/Detail.CFM?MDRFOI__ID=6587683&pc=MTA	2023826-2017-00874	2016-09-22	Injury	STAAR SURGICAL COMPANY	2017-05-24	MTA	ICL (IMPLANTABLE COLLAMER LENS)	Inadequacy of Device Shape and/or Size	Headache; Blurred Vision; No Code Available	N/A	NA	1	Event Description: THE REPORTER INDICATED THAT THE SURGEON IMPLANTED A 12.6MM VICM5_12.6 IMPLANTABLE COLLAMER LENS, -4.50 DIOPTER, IN THE PATIENT'S LEFT EYE (OS) ON (B)(6) 2016. THE PATIENT EXPERIENCED EXCESSIVE VAULTING, SIGNIFICANT REDUCTION OF IRIDO-CORNEAL ANGLES, BLURRED VISION, AND SEVERE HEADACHE. ON (B)(6) 2016 THE LENS WAS EXCHANGED FOR A SHORTER LENS. THE PROBLEM WAS RESOLVED. AS OF THE…	Lens Exchange	Resolved
https://www.accessdata.fda.gov/scripts/cdrh/cfdocs/cfMAUDE/Detail.CFM?MDRFOI__ID=12052958&pc=MTA	2023826-2021-02041	2021-02-23	Injury	STAAR SURGICAL COMPANY	2021-06-23	MTA	IMPLANTABLE COLLAMER LENS (ICL)	Misfocusing; Off-Label Use; Optical Problem	Headache; Blurred Vision; Visual Disturbances; Halo	P030016	NA	1	Event Description: THE REPORTER INDICATED THE SURGEON IMPLANTED A 12.6MM MICL12.6 IMPLANTABLE COLLAMER LENS, -10.00 DIOPTER, IN THE PATIENTS RIGHT EYE (OD) ON (B)(6) 2021. THE LENS WAS EXPLANTED ON (B)(6) 2021 DUE TO TRANSIENT LOSS OF BEST CORRECTED VISUAL ACUITY (BCVA), GLARE/HALOS, HEADACHE AND BLURRED VISION. THE PIS WERE ENLARGED BY YAG. THE LENS WAS EXCHANGED FOR A SHORTER LENS AND THE PROBL…	Lens Exchange + Secondary Operation	Resolved
https://www.accessdata.fda.gov/scripts/cdrh/cfdocs/cfMAUDE/Detail.CFM?MDRFOI__ID=12052969&pc=MTA	2023826-2021-02042	2021-02-23	Injury	STAAR SURGICAL COMPANY	2021-06-23	MTA	IMPLANTABLE COLLAMER LENS (ICL)	Misfocusing; Off-Label Use; Optical Problem	Headache; Blurred Vision; Visual Disturbances; Halo	P030016	NA	1	Event Description: THE REPORTER INDICATED THE SURGEON IMPLANTED A 12.6MM MICL12.6 IMPLANTABLE COLLAMER LENS, -10.00 DIOPTER, IN THE PATIENTS LEFT EYE (OS) ON (B)(6) 2021. THE LENS WAS EXPLANTED ON (B)(6) 2021 DUE TO TRANSIENT LOSS OF BEST CORRECTED VISUAL ACUITY (BCVA), GLARE/HALOS, HEADACHE AND BLURRED VISION. THE PIS WERE ENLARGED BY YAG. THE LENS WAS EXCHANGED FOR A SHORTER LENS AND THE PROBLE…	Lens Exchange + Secondary Operation	Resolved
https://www.accessdata.fda.gov/scripts/cdrh/cfdocs/cfMAUDE/Detail.CFM?MDRFOI__ID=11441206&pc=MTA	2023826-2021-00619	2021-01-02	Injury	STAAR SURGICAL COMPANY	2021-03-08	MTA	IMPLANTABLE COLLAMER LENS (ICL)	Adverse Event Without Identified Device or Use Problem	Headache; Discomfort	NA	NA	1	Event Description: THE REPORTER INDICATED THE SURGEON IMPLANTED A 12.1MM VICM5_12.1 IMPLANTABLE COLLAMER LENS, -02.00 DIOPTER, IN THE PATIENT'S LEFT EYE (OS), ON (B)(6) 2020. THE LENS WAS EXPLANTED ON (B)(6) 2021 DUE TO PATIENT HAD A HEADACHE AND DISCOMFORT. THE SYMPTOM WAS RESOLVED AFTER THE LENS WAS REMOVED. THE SURGEON DID NOT IMPLANT ANOTHER LENS. THE REPORTER INDICATED THERE WAS NO ABNORMAL …	Lens Extraction	Resolved
https://www.accessdata.fda.gov/scripts/cdrh/cfdocs/cfMAUDE/Detail.CFM?MDRFOI__ID=11441242&pc=MTA	2023826-2021-00618	2021-01-02	Injury	STAAR SURGICAL COMPANY	2021-03-08	MTA	IMPLANTABLE COLLAMER LENS (ICL)	Adverse Event Without Identified Device or Use Problem	Headache; Discomfort	NA	NA	1	Event Description: THE REPORTER INDICATED THE SURGEON IMPLANTED A 12.1MM VICM5_12.1 IMPLANTABLE COLLAMER LENS, -02.00 DIOPTER, IN THE PATIENT'S RIGHT EYE (OD), ON (B)(6) 2020. THE LENS WAS EXPLANTED ON (B)(6) 2021 DUE TO PATIENT HAD A HEADACHE AND DISCOMFORT. THE SYMPTOM WAS RESOLVED AFTER THE LENS WAS REMOVED. THE SURGEON DID NOT IMPLANT ANOTHER LENS. THE REPORTER INDICATED THERE WAS NO ABNORMAL…	Lens Extraction	Resolved
https://www.accessdata.fda.gov/scripts/cdrh/cfdocs/cfMAUDE/Detail.CFM?MDRFOI__ID=12073174&pc=MTA	2023826-2021-02030	2021-05-11	Injury	STAAR SURGICAL COMPANY	2021-06-27	MTA	IMPLANTABLE COLLAMER LENS (ICL)	Adverse Event Without Identified Device or Use Problem	Headache; Discomfort	NA	NA	1	Event Description: THE REPORTER INDICATED THAT A 12.6MM, VICMO12.6, -5.0 DIOPTER, IMPLANTABLE COLLAMER LENS WAS IMPLANTED INTO THE PATIENTS LEFT EYE (OS) ON (B)(6) 2021. IT WAS REPORTED THAT THE PATIENT COMPLAINED OF DISCOMFORT IN SEEING THINGS, SEVERE HEADACHE, AFFECTING NORMAL LIFE AND WORK. ON (B)(6) 2021 THE LENS WAS EXPLANTED PER PATIENTS REQUEST AND THE PROBLEM RESOLVED. IN THE REPORTERS OP…	Lens Extraction	Resolved
https://www.accessdata.fda.gov/scripts/cdrh/cfdocs/cfMAUDE/Detail.CFM?MDRFOI__ID=12073149&pc=MTA	2023826-2021-02029	2021-05-11	Injury	STAAR SURGICAL COMPANY	2021-06-27	MTA	IMPLANTABLE COLLAMER LENS (ICL)	Adverse Event Without Identified Device or Use Problem	Headache; Discomfort	NA	NA	1	Event Description: THE REPORTER INDICATED THAT A 12.6MM, VICMO12.6, -5.5 DIOPTER, IMPLANTABLE COLLAMER LENS WAS IMPLANTED INTO THE PATIENTS LEFT EYE (OS) ON (B)(6) 2021. IT WAS REPORTED THAT THE PATIENT COMPLAINED OF DISCOMFORT IN SEEING THINGS, SEVERE HEADACHE, AFFECTING NORMAL LIFE AND WORK. ON (B)(6) 2021 THE LENS WAS EXPLANTED PER PATIENTS REQUEST AND THE PROBLEM RESOLVED. IN THE REPORTER'S O…	Lens Extraction	Resolved
https://www.accessdata.fda.gov/scripts/cdrh/cfdocs/cfMAUDE/Detail.CFM?MDRFOI__ID=15442519&pc=MTA	2023826-2022-03148	2022-03-05	Injury	STAAR SURGICAL COMPANY	2022-09-16	MTA	IMPLANTABLE COLLAMER LENS (ICL)	Adverse Event Without Identified Device or Use Problem	Headache; Discomfort	P030016	NA	1	Event Description: THE REPORTER INDICATED THAT A 12.6MM, VICM5_12.6, -9.50 DIOPTER, IMPLANTABLE COLLAMER LENS WAS IMPLANTED INTO THE PATIENTS RIGHT EYE (OD) ON (B)(6) 2022. ON (B)(6) 2022 THE LENS WAS EXPLANTED DUE TO DISCOMFORT AND HEADACHE. THE EXPLANT RESOLVED THE PROBLEM. Manufacturer Narrative: (B)(4). CLAIM # (B)(4).	Lens Extraction	Resolved
https://www.accessdata.fda.gov/scripts/cdrh/cfdocs/cfMAUDE/Detail.CFM?MDRFOI__ID=15442553&pc=MTA	2023826-2022-03149	2022-03-05	Injury	STAAR SURGICAL COMPANY	2022-09-16	MTA	IMPLANTABLE COLLAMER LENS (ICL)	Adverse Event Without Identified Device or Use Problem	Headache; Discomfort	P030016	NA	1	Event Description: THE REPORTER INDICATED THAT A 12.6MM, VICM5_12.6, -9.50 DIOPTER, IMPLANTABLE COLLAMER LENS WAS IMPLANTED INTO THE PATIENTS LEFT EYE (OS) ON (B)(6) 2022. ON (B)(6) 2022 THE LENS WAS EXPLANTED DUE TO DISCOMFORT AND HEADACHE. THE EXPLANT RESOLVED THE PROBLEM. Manufacturer Narrative: (B)(4). CLAIM # (B)(4).	Lens Extraction	Resolved
https://www.accessdata.fda.gov/scripts/cdrh/cfdocs/cfMAUDE/Detail.CFM?MDRFOI__ID=17477607&pc=MTA	2023826-2023-03351	2023-05-01	Injury	STAAR SURGICAL COMPANY	2023-08-08	MTA	IMPLANTABLE COLLAMER LENS (ICL)	Adverse Event Without Identified Device or Use Problem	Headache; Discomfort	P030016	NA	1	Event Description: THE REPORTER INDICATED THAT A 12.1MM VICM5_12.1 IMPLANTABLE COLLAMER LENS OF -11.50 DIOPTER WAS IMPLANTED INTO THE PATIENT'S RIGHT EYE (OD) ON (B)(6) 2023. ON (B)(6) 2023 LENS WAS EXPLANTED DUE TO PATIENT DISSATISFACTION- HEADACHE AND DISCOMFORT AND THE PROBLEM RESOLVED. Manufacturer Narrative: H6 - TYPE OF INVESTIGATION - LENS WORK ORDER SEARCH: NO SIMILAR COMPLAINT TYPE EVENT…	Lens Extraction	Resolved
https://www.accessdata.fda.gov/scripts/cdrh/cfdocs/cfMAUDE/Detail.CFM?MDRFOI__ID=16766106&pc=MTA	2023826-2023-01417	2023-03-20	Injury	STAAR SURGICAL COMPANY	2023-04-18	MTA	IMPLANTABLE COLLAMER LENS (ICL)	Patient-Device Incompatibility	Headache; Discomfort; No Clinical Signs, Symptoms or Conditions	P030016	NA	1	Event Description: THE REPORTER INDICATED THAT A 12.6MM VICMO12.6 IMPLANTABLE COLLAMER LENS OF -9.5 DIOPTER WAS IMPLANTED INTO THE PATIENT'S RIGHT EYE (OD) ON (B)(6) 2023. ON (B)(6) 2023, THE LENS WAS REMOVED. REPORTEDLY, "THE PATIENT UNDERWENT BILATERAL ICL LENS IMPLANTATION IN OUR HOSPITAL ON (B)(6) 202 AND (B)(6) 2022 RESPECTIVELY. AFTER THE OPERATION, HE COMPLAINED OF A HEADACHE AND DISCOMFOR…	Lens Extraction	Resolved
https://www.accessdata.fda.gov/scripts/cdrh/cfdocs/cfMAUDE/Detail.CFM?MDRFOI__ID=16766108&pc=MTA	2023826-2023-01418	2023-03-20	Injury	STAAR SURGICAL COMPANY	2023-04-18	MTA	IMPLANTABLE COLLAMER LENS (ICL)	Patient-Device Incompatibility	Headache; Discomfort; No Clinical Signs, Symptoms or Conditions	P030016	NA	1	Event Description: THE REPORTER INDICATED THAT A 12.6MM VICMO12.6 IMPLANTABLE COLLAMER LENS OF -11.0 DIOPTER WAS IMPLANTED INTO THE PATIENT'S LEFT EYE (OS) ON (B)(6) 2023. ON (B)(6) 2023, THE LENS WAS REMOVED. REPORTEDLY, "THE PATIENT UNDERWENT BILATERAL ICL LENS IMPLANTATION IN OUR HOSPITAL ON (B)(6) 2023. AFTER THE OPERATION, HE COMPLAINED OF A HEADACHE AND DISCOMFORT ." THE PROBLEM WAS RESOLVE…	Lens Extraction	Resolved
https://www.accessdata.fda.gov/scripts/cdrh/cfdocs/cfMAUDE/Detail.CFM?MDRFOI__ID=14030225&pc=MTA	2023826-2022-01092	2022-03-12	Injury	STAAR SURGICAL COMPANY	2022-04-06	MTA	IMPLANTABLE COLLAMER LENS (ICL)	Misfocusing; Off-Label Use; Optical Problem	Headache; Inflammation; Intraocular Pressure Increased; Blurred Vision; Halo; Appropriate Clinical Signs, Symptoms, Conditions Term / Code Not Available	NA	NA	1	Event Description: THE REPORTER INDICATED THE SURGEON IMPLANTED A 12.1MM VICM5_12.1 IMPLANTABLE COLLAMER LENS, -08.50 DIOPTER, IN THE PATIENTS RIGHT EYE (OD), ON (B)(6) 2021. THE PATIENT EXPERIENCED ELEVATED INTRAOCULAR PRESSURE (IOP), PIGMENT DISPERSION, GLARE/HALOES, BLURRED VISION, AC INFLAMMATION CELLS AND IRREGULAR PUPIL. THE LENS REMAINED IMPLANTED. THE CAUSE OF THE EVENT WAS UNKNOWN. ADDIT…	Lens Extraction	Not_Resolved
https://www.accessdata.fda.gov/scripts/cdrh/cfdocs/cfMAUDE/Detail.CFM?MDRFOI__ID=15964027&pc=MTA	2023826-2022-04484	2022-11-08	Injury	STAAR SURGICAL COMPANY	2022-12-12	MTA	IMPLANTABLE COLLAMER LENS (ICL)	Patient-Device Incompatibility; Adverse Event Without Identified Device or Use Problem	Headache; Intraocular Pressure Increased; Blurred Vision; Dizziness	P030016	NA	1	Event Description: THE REPORTER INDICATED THAT A 13.2MM VICMO13.2 IMPLANTABLE COLLAMER LENS WITH A -7.0 DIOPTER WAS IMPLANTED IN THE PATIENT'S RIGHT EYE (OD) ON (B)(6) 2022. ON (B)(6) 2022, THE LENS WAS REMOVED. REPORTEDLY, "AFTER THE PATIENT'S SURGERY, VISION, REFRACTIVE STATE, INTRAOCULAR PRESSURE, AND ARCH HIGH ARE NORMAL. THE PATIENT CONSCIOUSLY DIZZY AND HEADACHE." THE PROBLEM WAS RESOLVED. …	Lens Extraction	Resolved
https://www.accessdata.fda.gov/scripts/cdrh/cfdocs/cfMAUDE/Detail.CFM?MDRFOI__ID=15965745&pc=MTA	2023826-2022-04483	2022-11-08	Injury	STAAR SURGICAL COMPANY	2022-12-13	MTA	IMPLANTABLE COLLAMER LENS (ICL)	Patient-Device Incompatibility; Adverse Event Without Identified Device or Use Problem	Headache; Intraocular Pressure Increased; Blurred Vision; Dizziness	P030016	NA	1	Event Description: THE REPORTER INDICATED THAT A 13.2MM VICMO13.2 IMPLANTABLE COLLAMER LENS WITH A -8.5 DIOPTER WAS IMPLANTED IN THE PATIENT'S LEFT EYE (OS) ON (B)(6) 2022. ON (B)(6) 2022, THE LENS WAS REMOVED. REPORTEDLY, "AFTER THE PATIENT'S SURGERY, VISION, REFRACTIVE STATE, INTRAOCULAR PRESSURE, AND ARCH HIGH ARE NORMAL. THE PATIENT CONSCIOUSLY DIZZY AND HEADACHE." THE PROBLEM WAS RESOLVED. C…	Lens Extraction	Resolved
https://www.accessdata.fda.gov/scripts/cdrh/cfdocs/cfMAUDE/Detail.CFM?MDRFOI__ID=7404820&pc=MTA	2023826-2018-00508	2018-03-06	Injury	STAAR SURGICAL COMPANY	2018-04-06	MTA	IMPLANTABLE COLLAMER LENS (ICL)	Inadequacy of Device Shape and/or Size	Headache; Intraocular Pressure Increased; Blurred Vision; No Code Available	P030016	NA	1	Event Description: THE SURGEON INDICATED THAT A 13.2MM MICL13.2, -7.0 DIOPTER, IMPLANTABLE COLLAMER LENS WAS IMPLANTED IN THE PATIENT'S RIGHT EYE (OD) ON (B)(6) 2018. PATIENT REPORTED TO HAVE BLURRY VISION AND HEADACHE. ON (B)(6) 2018 THE SURGEON OBSERVED EXCESSIVE VAULT, ELEVATED IOP (INTRAOCULAR PRESSURE), NARROWING OF THE ANGLE, ANGLE CLOSURE AND SHALLOWING OF THE ACD (ANTERIOR CHAMBER DEPTH).…	Lens Extraction + Secondary Operation	Unknown
https://www.accessdata.fda.gov/scripts/cdrh/cfdocs/cfMAUDE/Detail.CFM?MDRFOI__ID=9781720&pc=MTA	2023826-2020-00391	NA	Injury	STAAR SURGICAL COMPANY	2020-03-03 05:00:00	MTA	IMPLANTABLE COLLAMER LENS (ICL)	Misfocusing; Inadequacy of Device Shape and/or Size; Patient-Device Incompatibility	Headache; Intraocular Pressure Increased; Blurred Vision; No Code Available	P030016	NA	1	Event Description: THE REPORTER INDICATED THAT THE SURGEON IMPLANTED A 13.2MM MICL13.2 LENS, -10.0 DIOPTER INTO THE PATIENT'S LEFT (OS) EYE ON (B)(6) 2020. ON (B)(6) 2020 THE LENS WAS EXCHANGED WITH A SHORTER LENS DUE TO EXCESSIVE VAULT, ELEVATED IOP, SIGNIFICANT REDUCTION OF IRIDO-CORNEAL ANGLES (ICA), ANGLE CLOSURE, BLURRED VISION, AND HEADACHES. THE PROBLEM IS RESOLVED. REPORTEDLY THE PATIENT …	Unknown	Unknown
https://www.accessdata.fda.gov/scripts/cdrh/cfdocs/cfMAUDE/Detail.CFM?MDRFOI__ID=6324404&pc=MTA	2023826-2017-00233	2016-12-28	Injury	STAAR SURGICAL COMPANY	2017-02-10	MTA	IMPLANTABLE COLLAMER LENS (ICL)	Inadequacy of Device Shape and/or Size	Headache; Intraocular Pressure Increased; Nausea; Pain; Pupillary Block; Blurred Vision; Vomiting; No Code Available	P030016	NA	1	Event Description: THE REPORTER STATED THE SURGEON IMPLANTED A 12.6MM MICL12.6 IMPLANTABLE COLLAMER LENS, -11.0 DIOPTER, IN THE PATIENT'S EYE ON (B)(6) 2016. THE LENS WAS EXPLANTED ON (B)(6) 2016 DUE TO EXTREME VAULTING. ADDITIONAL INFORMATION HAS BEEN REQUESTED BUT NONE HAS BEEN FORTHCOMING. IF ADDITIONAL INFORMATION IS RECEIVED, A SUPPLEMENTAL MEDWATCH REPORT WILL BE SUBMITTED. Manufacturer Nar…	Lens Exchange + Secondary Operation	Resolved
https://www.accessdata.fda.gov/scripts/cdrh/cfdocs/cfMAUDE/Detail.CFM?MDRFOI__ID=7065520&pc=MTA	2023826-2017-01781	2017-10-13	Injury	STAAR SURGICAL COMPANY	2017-11-28	MTA	IMPLANTABLE COLLAMER LENS (ICL)	Inadequacy of Device Shape and/or Size	Headache; Intraocular Pressure Increased; Nausea; Pupillary Block; Blurred Vision; No Code Available	P030016	NA	1	Event Description: THE REPORTER INDICATED THE SURGEON IMPLANTED A 12.6MM MICL12.6 IMPLANTABLE COLLAMER LENS, -16.0 DIOPTER, IN THE PATIENT'S RIGHT EYE (OD) ON (B)(6) 2017. THE LENS WAS EXPLANTED ON (B)(6) 2017 DUE TO EXCESSIVE VAULTING, ELEVATED INTRAOCULAR PRESSURE (PUPILLARY BLOCK) AND SHALLOWING OF THE ANTERIOR CHAMBER DEPTH (ACD). A REVISION OF THE PERIPHERAL IRIDECTOMIES WAS PERFORMED. THE P…	Lens Exchange	Resolved
https://www.accessdata.fda.gov/scripts/cdrh/cfdocs/cfMAUDE/Detail.CFM?MDRFOI__ID=7065648&pc=MTA	2023826-2017-01782	2017-10-13	Injury	STAAR SURGICAL COMPANY	2017-11-28	MTA	IMPLANTABLE COLLAMER LENS (ICL)	Inadequacy of Device Shape and/or Size	Headache; Intraocular Pressure Increased; Nausea; Pupillary Block; Blurred Vision; No Code Available	P030016	NA	1	Event Description: THE REPORTER INDICATED THE SURGEON IMPLANTED A 12.6MM MICL12.6 IMPLANTABLE COLLAMER LENS, -16.0 DIOPTER, IN THE PATIENT'S LEFT EYE (OS) ON (B)(6) 2017. THE LENS WAS EXPLANTED ON (B)(6) 2017 DUE TO EXCESSIVE VAULTING AND ELEVATED INTRAOCULAR PRESSURE (PUPILLARY BLOCK). THE PATIENT EXPERIENCED BLURRY VISION, HEADACHE AND NAUSEA. THE LENS WAS EXCHANGED FOR A SHORTER LENS AND THE P…	Lens Exchange	Resolved
https://www.accessdata.fda.gov/scripts/cdrh/cfdocs/cfMAUDE/Detail.CFM?MDRFOI__ID=6853814&pc=MTA	2023826-2017-01415	NA	Injury	STAAR SURGICAL COMPANY	2017-09-08	MTA	IMPLANTABLE COLLAMER LENS (ICL)	Adverse Event Without Identified Device or Use Problem	Headache; Intraocular Pressure Increased; No Code Available	P030016	NA	1	Event Description: THE REPORTER STATED THE SURGEON IMPLANTED A 13.2MM MICL13.2 IMPLANTABLE COLLAMER LENS, -10.0 DIOPTER, IN THE PATIENT'S RIGHT EYE (OD), ON (B)(6) 2017. THE LENS WAS EXPLANTED ON (B)(6) 2017 DUE TO ELEVATED INTRAOCULAR PRESSURE AND PIGMENT DISPERSION. THE PATIENT EXPERIENCED ADDITIONAL SYMPTOMS - HEADACHE. THE LENS WAS NOT EXCHANGED FOR ANOTHER LENS. THE PATIENT'S CURRENT CONDITI…	Lens Extraction	Resolved
https://www.accessdata.fda.gov/scripts/cdrh/cfdocs/cfMAUDE/Detail.CFM?MDRFOI__ID=5728010&pc=MTA	2023826-2016-00823	2015-10-02	Injury	STAAR SURGICAL COMPANY	2016-06-15	MTA	ICL (IMPLANTABLE COLLAMER LENS)	Appropriate Term/Code Not Available	Headache; Intraocular Pressure Increased; No Code Available	P030016	NA	1	Event Description: THE REPORTER STATED THE SURGEON IMPLANTED A 13.2MM MICL13.2 IMPLANTABLE COLLAMER LENS, -14.0 DIOPTER, IN THE PATIENT'S LEFT EYE (OS) ON (B)(6) 2015. THE LENS WAS EXPLANTED ON (B)(6) 2016 DUE TO ELEVATED INTRAOCULAR PRESSURE AND PIGMENT DISPERSION. THE PATIENT EXPERIENCED HEADACHES. THE REPORTER STATED THE CAUSE OF THE EVENT WAS DUE TO ABNORMAL POSTERIOR IRIS ANATOMY. THE LENS W…	Lens Extraction	Unknown
https://www.accessdata.fda.gov/scripts/cdrh/cfdocs/cfMAUDE/Detail.CFM?MDRFOI__ID=5728011&pc=MTA	2023826-2016-00822	2015-10-02	Injury	STAAR SURGICAL COMPANY	2016-06-15	MTA	ICL (IMPLANTABLE COLLAMER LENS)	Appropriate Term/Code Not Available	Headache; Intraocular Pressure Increased; No Code Available	P030016	NA	1	Event Description: THE REPORTER STATED THE SURGEON IMPLANTED A 13.2MM MICL13.2 IMPLANTABLE COLLAMER LENS, -14.0 DIOPTER, IN THE PATIENT'S RIGHT EYE (OD) ON (B)(6) 2015. THE LENS WAS EXPLANTED ON (B)(6) 2016 DUE TO ELEVATED INTRAOCULAR PRESSURE AND PIGMENT DISPERSION. THE PATIENT EXPERIENCED HEADACHES. THE REPORTER STATED THE CAUSE OF THE EVENT WAS DUE TO ABNORMAL POSTERIOR IRIS ANATOMY. THE LENS …	Lens Extraction	Unknown
https://www.accessdata.fda.gov/scripts/cdrh/cfdocs/cfMAUDE/Detail.CFM?MDRFOI__ID=6765864&pc=MTA	2023826-2017-01265	2017-07-06	Injury	STAAR SURGICAL COMPANY	2017-08-03	MTA	IMPLANTABLE COLLAMER LENS (ICL)	Inadequacy of Device Shape and/or Size	Headache; Intraocular Pressure Increased; No Code Available	P030016	NA	1	Event Description: THE REPORTER STATED THAT THE SURGEON IMPLANTED A 13.2MM MICL13.2, -9.5 DIOPTER, IMPLANTABLE COLLAMER LENS IN THE PATIENTS RIGHT EYE (OD) ON (B)(6) 2017. THE LENS WAS EXCHANGED FOR A SMALLER SIZE LENS ON (B)(6) 2017 DUE TO HIGH VAULT, ELEVATED IOP, AND NARROWING OF THE ANGLE. HEADACHE WAS ALSO REPORTED AS AN ADDITIONAL SYMPTOM. THE REPORTER STATED THAT THE CAUSE OF THE EVENT WAS…	Lens Exchange	Resolved
https://www.accessdata.fda.gov/scripts/cdrh/cfdocs/cfMAUDE/Detail.CFM?MDRFOI__ID=7320744&pc=MTA	2023826-2018-00327	2018-02-03	Injury	STAAR SURGICAL COMPANY	2018-03-07	MTA	IMPLANTABLE COLLAMER LENS (ICL)	Inadequacy of Device Shape and/or Size	Headache; Intraocular Pressure Increased; No Code Available	NA	NA	1	Event Description: THE REPORTER INDICATED THAT THE SURGEON IMPLANTED A 13.2MM VICMO13.2 IMPLANTABLE COLLAMER LENS, DIOPTER -14.00, INTO THE PATIENT'S LEFT EYE (OS) ON (B)(6) 2018. ON (B)(6) 2018 THE SURGEON NOTES THE FOLLOWING: EXCESSIVE VAULT, ELEVATED IOP, IRIS PIGMENTS ON ICL, "MASSIVE" HEADACHE, APPOSITIONAL ANGLE CLOSURE. ADDITIONAL INFORMATION PROVIDED: 1 WEEK POST-OP THE IOP BECAME ELEVATE…	Lens Retention	Resolved
https://www.accessdata.fda.gov/scripts/cdrh/cfdocs/cfMAUDE/Detail.CFM?MDRFOI__ID=5668555&pc=MTA	2023826-2016-00732	NA	Injury	STAAR SURGICAL COMPANY	2016-05-19	MTA	ICL (IMPLANTABLE COLLAMER LENS)	Inadequacy of Device Shape and/or Size; Appropriate Term/Code Not Available	Headache; Intraocular Pressure Increased; No Code Available	P030016	NA	1	Event Description: THE REPORTER INDICATED THE SURGEON IMPLANTED A 13.2MM MICL13.2 IMPLANTABLE COLLAMER LENS, -16.0 DIOPTER, IN THE PATIENT'S LEFT EYE (OS) ON (B)(6) 2016. THE LENS WAS EXPLANTED ON (B)(6) 2016 DUE TO HIGH VAULT AND PRESSURE SPIKE. THE LENS WAS EXCHANGED FOR A SHORTER LENS. ADDITIONAL INFORMATION HAS BEEN REQUESTED BUT NONE HAS BEEN FORTHCOMING. IF ADDITIONAL INFORMATION IS RECEIVE…	Lens Exchange	Unknown
https://www.accessdata.fda.gov/scripts/cdrh/cfdocs/cfMAUDE/Detail.CFM?MDRFOI__ID=6453292&pc=MTA	2023826-2017-00534	2017-01-30	Injury	STAAR SURGICAL COMPANY	2017-04-03	MTA	ICL (IMPLANTABLE COLLAMER LENS)	Manufacturing, Packaging or Shipping Problem	Headache; Intraocular Pressure Increased; No Code Available	N/A	NA	1	Event Description: THE REPORTER INDICATED THAT THE SURGEON IMPLANTED A 13.2MM VICMO13.2 IMPLANTABLE COLLAMER LENS, -9.0 DIOPTER, IN THE PATIENT'S RIGHT EYE (OD) ON (B)(6) 2017. THE PATIENT EXPERIENCED HEADACHE, ELEVATED IOP. THE CUSTOMER STATES THERE WAS NO CENTER HOLE ON THE LENS. ON (B)(6) 2017 THE LENS WAS EXCHANGED AND THE PROBLEM WAS RESOLVED. AS OF THE DAY OF MDR SUBMISSION, THE LENS HAS NO…	Lens Exchange	Resolved
https://www.accessdata.fda.gov/scripts/cdrh/cfdocs/cfMAUDE/Detail.CFM?MDRFOI__ID=6918173&pc=MTA	2023826-2017-01503	2017-07-18	Injury	STAAR SURGICAL COMPANY	2017-10-05	MTA	IMPLANTABLE COLLAMER LENS (ICL)	Shelf Life Exceeded; Inadequacy of Device Shape and/or Size	Headache; Intraocular Pressure Increased; No Code Available	P030016	NA	1	Event Description: THE REPORTER INDICATED THAT THE SURGEON IMPLANTED A MICL13.7, -7.5 DIOPTER, IMPLANTABLE COLLAMER LENS IN THE PATIENT'S LEFT EYE (OS) ON (B)(6) 2017. ON (B)(6) 2017, THE LENS WAS EXPLANTED DUE TO INTERMITTENT ELEVATED IOP, HEADACHES, EXCESSIVE VAULTING, NARROWING OF THE ANGLE, AND SHALLOWING OF THE ACD. THE LENS WAS EXCHANGED WITH A NEW LENS. Manufacturer Narrative: PATIENT CODE…	Lens Exchange	Unknown
https://www.accessdata.fda.gov/scripts/cdrh/cfdocs/cfMAUDE/Detail.CFM?MDRFOI__ID=10138562&pc=MTA	2023826-2020-01184	2019-11-05	Injury	STAAR SURGICAL COMPANY	2020-06-10	MTA	IMPLANTABLE COLLAMER LENS (ICL)	Patient-Device Incompatibility; Optical Problem	Headache; Intraocular Pressure Increased; Visual Disturbances; Halo	N/A	NA	1	Event Description: THE REPORTER INDICATED THAT THE SURGEON IMPLANTED A 13.2MM VICM5_13.2, -04.00 DIOPTER, IMPLANTABLE COLLAMER LENS INTO THE PATIENT'S RIGHT EYE (OD) ON (B)(6) 2019. ELEVATED IOP (29MMHG) WITHOUT PUPIL BLOCK AND ANGLE CLOSURE WAS ASSESSED ON (B)(6) 2020, GLARE/HALOES WERE OBSERVED. LENS REMAINS IMPLANTED. CAUSE OF THE EVENT IS REPORTED AS PATIENT RELATED FACTOR (ACCOMMODATION SPAS…	Lens Retention	Resolved
https://www.accessdata.fda.gov/scripts/cdrh/cfdocs/cfMAUDE/Detail.CFM?MDRFOI__ID=10138567&pc=MTA	2023826-2020-01185	2019-11-05	Injury	STAAR SURGICAL COMPANY	2020-06-10	MTA	IMPLANTABLE COLLAMER LENS (ICL	Patient-Device Incompatibility; Optical Problem	Headache; Intraocular Pressure Increased; Visual Disturbances; Halo	N/A	NA	1	Event Description: THE REPORTER INDICATED THAT THE SURGEON IMPLANTED A 13.2MM VICM5_13.2, -04.50 DIOPTER, IMPLANTABLE COLLAMER LENS INTO THE PATIENT'S LEFT EYE (OS) ON (B)(6) 2019. ELEVATED IOP (27MMHG) WITHOUT PUPIL BLOCK AND ANGLE CLOSURE WAS ASSESSED ON (B)(6) 2020, GLARE/HALOES WERE OBSERVED. LENS REMAINS IMPLANTED. CAUSE OF THE EVENT IS REPORTED AS PATIENT RELATED FACTOR (ACCOMMODATION SPASM…	Lens Retention + Secondary Operation	Resolved
https://www.accessdata.fda.gov/scripts/cdrh/cfdocs/cfMAUDE/Detail.CFM?MDRFOI__ID=13582873&pc=MTA	2023826-2022-00595	2022-01-12	Injury	STAAR SURGICAL COMPANY	2022-02-23	MTA	IMPLANTABLE COLLAMER LENS (ICL)	Adverse Event Without Identified Device or Use Problem	Headache; Intraocular Pressure Increased; Visual Disturbances; Halo; Eye Pain; Appropriate Clinical Signs, Symptoms, Conditions Term / Code Not Available	NA	NA	1	Event Description: THE REPORTER INDICATED THAT A 12.6MM, VICM512.6, -12.0 DIOPTER IMPLANTABLE COLLAMER LENS WAS IMPLANTED INTO THE PATIENT'S LEFT EYE (OS) ON (B)(6) 2021. ON (B)(6) 2022 THE PATIENT EXPERIENCED ELEVATED IOP (INTRAOCULAR PRESSURE), HEADACHE AND NAUSEA, MEDICAL INTERVENTION (PILOCARPINE/SAMPIRO 3-4/DAY) WAS PRESCRIBED. ON (B)(6) 2022 THE PATIENT VISITED AN EMERGENCY CLINIC DUE TO EY…	Lens Retention	Unknown
https://www.accessdata.fda.gov/scripts/cdrh/cfdocs/cfMAUDE/Detail.CFM?MDRFOI__ID=13582877&pc=MTA	2023826-2022-00594	2022-01-12	Injury	STAAR SURGICAL COMPANY	2022-02-23	MTA	IMPLANTABLE COLLAMER LENS (ICL)	Adverse Event Without Identified Device or Use Problem	Headache; Intraocular Pressure Increased; Visual Disturbances; Halo; Eye Pain; Appropriate Clinical Signs, Symptoms, Conditions Term / Code Not Available	NA	NA	1	Event Description: THE REPORTER INDICATED THAT A 12.6MM, VICM512.6, -11.50 DIOPTER IMPLANTABLE COLLAMER LENS WAS IMPLANTED INTO THE PATIENT'S RIGHT EYE (OD) ON (B)(6) 2021. ON (B)(6) 2022 THE PATIENT EXPERIENCED ELEVATED IOP (INTRAOCULAR PRESSURE), HEADACHE AND NAUSEA, MEDICAL INTERVENTION (PILOCARPINE/SAMPIRO 3-4/DAY) WAS PRESCRIBED. ON (B)(6) 2022 THE PATIENT VISITED AN EMERGENCY CLINIC DUE TO …	Lens Retention	Unknown
https://www.accessdata.fda.gov/scripts/cdrh/cfdocs/cfMAUDE/Detail.CFM?MDRFOI__ID=4767216&pc=MTA	2023826-2015-00531	2015-03-09	Injury	STAAR SURGICAL COMPANY	2015-05-12	MTA	ICL (IMPLANTABLE COLLAMER LENS)	Inadequacy of Device Shape and/or Size; Appropriate Term/Code Not Available	Headache; Intraocular Pressure Increased; Visual Disturbances; No Code Available	P030016	NA	1	Event Description: THE REPORTER INDICATED THE SURGEON IMPLANTED A 12.6MM MICL12.6 IMPLANTABLE COLLAMER LENS IN THE PATIENT'S RIGHT EYE (OD) ON (B)(6) 2015. AT THE SAME DAY POST-OPERATIVE EXAMINATION, THE PATIENT HAD 20/60 UNCORRECTED VISUAL ACUITY, INTRAOCULAR PRESSURE BY APPLANATION WAS 41MM HG AND LENS HAD A 200% VAULT. THE PATIENT COMPLAINED OF SLIGHT HEADACHE AND SHE WAS EXPERIENCING "STARBUR…	Lens Exchange	Resolved
https://www.accessdata.fda.gov/scripts/cdrh/cfdocs/cfMAUDE/Detail.CFM?MDRFOI__ID=7794679&pc=MTA	2023826-2018-01199	2018-01-25	Injury	STAAR SURGICAL COMPANY	2018-08-17	MTA	IMPLANTABLE COLLAMER LENS (ICL)	Adverse Event Without Identified Device or Use Problem	Headache; Intraocular Pressure Increased; Vomiting; No Code Available	NA	NA	1	Event Description: THE REPORTER INDICATED THE SURGEON IMPLANTED A 13.2MM VICMO13.2 IMPLANTABLE COLLAMER LENS, -11.00 DIOPTER, IN THE PATIENT'S RIGHT EYE (OD), ON (B)(6) 2018. TWO DAYS AFTER THE SURGERY, THE PATIENT SUFFERED FROM SEVERE VOMITING, HEADACHE, AC LOSS AND TENSION OF MORE THAN 40. THE SURGEON ADMINISTERED MANNITOL BY IV AND THE SYMPTOMS DECREASED. AFTER 1 WEEK, THE LENS WAS EXPLANTED O…	Lens Exchange	Resolved
https://www.accessdata.fda.gov/scripts/cdrh/cfdocs/cfMAUDE/Detail.CFM?MDRFOI__ID=4542564&pc=MTA	2023826-2015-00176	2015-01-15	Injury	STAAR SURGICAL COMPANY	2015-02-24	MTA	VISIAN ICL (IMPLANTABLE COLLAMER LENS)	Appropriate Term/Code Not Available	Headache; Intraocular Pressure Increased; Vomiting; No Code Available	NA	NA	1	Event Description: THE REPORTER INDICATED THE SURGEON IMPLANTED A 12.1MM VICMO12.1 IMPLANTABLE COLLAMER LENS IN THE PATIENT'S RIGHT EYE (OD) ON (B)(6) 2014. THAT EVENING AFTER SURGERY THE PATIENT HAD HEADACHE AND VOMITING, SUGGESTIVE OF INCREASED INTRAOCULAR PRESSURE. THE PATIENT HAS ALSO COMPLAINED OF GLARE. AT THE LAST POST-OP VISIT, THE PATIENT'S SYMPTOMS HAVE SUBSIDED BUT INTRAOCULAR PRESSURE…	Lens Retention	Resolved
https://www.accessdata.fda.gov/scripts/cdrh/cfdocs/cfMAUDE/Detail.CFM?MDRFOI__ID=6373025&pc=MTA	2023826-2017-00299	2017-01-05	Injury	STAAR SURGICAL COMPANY	2017-03-02	MTA	IMPLANTABLE COLLAMER LENS	Device Operates Differently Than Expected	Headache; Intraocular Pressure, Delayed, Uncontrolled; No Code Available	NA	NA	1	Event Description: THE REPORTER INDICATED THAT THE SURGEON IMPLANTED A 13.2MM VICM5 13.2 IMPLANTABLE COLLAMER LENS, -9.00 DIOPTER, INTO THE PATIENT'S LEFT EYE (OS) ON (B)(6) 2016. ON (B)(6) 2017, THE PATIENT EXPERIENCED PIGMENT DISPERSION, HEADCHES, AND OCULAR PRESSURE. AS OF THE DATE OF MDR SUBMISSION, THE LENS REMAINS IMPLANTED IN THE PATIENT AND THEREFORE, HAS NOT BEEN RETURNED FOR EVALUATION.…	Lens Retention	Unknown
https://www.accessdata.fda.gov/scripts/cdrh/cfdocs/cfMAUDE/Detail.CFM?MDRFOI__ID=6381321&pc=MTA	2023826-2017-00325	2017-01-05	Injury	STAAR SURGICAL COMPANY	2017-03-06	MTA	ICL (IMPLANTABLE COLLAMER LENS)	Device Operates Differently Than Expected	Headache; Intraocular Pressure, Delayed, Uncontrolled; No Code Available	N/A	NA	1	Event Description: THE REPORTER INDICATED THAT THE SURGEON IMPLANTED A VICM5_13.2 IMPLANTABLE COLLAMER LENS, -09.00 DIOPTER, IN THE PATIENT'S RIGHT EYE (OD) ON (B)(6) 2016. ON (B)(6) 2017 THE PATIENT EXPERIENCED PIGMENT DISPERSION, HEADACHES, AND OCULAR PRESSURE. ON (B)(6) 2017 IT WAS DOCUMENTED THAT THERE WAS NO FREE PIGMENT IN ANTERIOR CHAMBER OF THE PATIENT. THE LENS REMAINS IMPLANTED. Manufac…	Lens Retention	Unknown
https://www.accessdata.fda.gov/scripts/cdrh/cfdocs/cfMAUDE/Detail.CFM?MDRFOI__ID=4614654&pc=MTA	2023826-2015-00344	2014-05-30	Injury	STAAR SURGICAL COMPANY AG	2015-03-18	MTA	ICL (IMPLANTABLE COLLAMER LENS)	Appropriate Term/Code Not Available	Headache; Nausea; Halo; No Code Available	P030016	NA	1	Event Description: THE REPORTER INDICATED THE SURGEON IMPLANTED A 12.0MM ICM120V4 IMPLANTABLE COLLAMER LENS IN THE PATIENT'S RIGHT EYE (OD) ON (B)(6) 2014. THE LENS WAS EXPLANTED ON (B)(6) 2014 DUE TO THE PATIENT EXPERIENCED GLARE/HALOS, HEADACHE AND WAS NAUSEOUS. THE LENS WAS NOT EXCHANGED FOR ANOTHER LENS. THE PATIENT'S POST-OP BEST-CORRECTED VISUAL ACUITY WAS 20/24._x000D_ Manufacturer Narrati…	Lens Extraction	Resolved
https://www.accessdata.fda.gov/scripts/cdrh/cfdocs/cfMAUDE/Detail.CFM?MDRFOI__ID=4614667&pc=MTA	2023826-2015-00345	2014-05-30	Injury	STAAR SURGICAL COMPANY AG	2015-03-18	MTA	ICL (IMPLANTABLE COLLAMER LENS)	Appropriate Term/Code Not Available	Headache; Nausea; Halo; No Code Available	P030016	NA	1	Event Description: THE REPORTER INDICATED THE SURGEON IMPLANTED A 12.0MM ICM120V4 IMPLANTABLE COLLAMER LENS IN THE PATIENT'S LEFT EYE (OS) ON (B)(6) 2014. THE LENS WAS EXPLANTED ON (B)(6) 2014 DUE TO THE PATIENT EXPERIENCED GLARE/HALOS, HEADACHE AND WAS NAUSEOUS. THE LENS WAS NOT EXCHANGED FOR ANOTHER LENS. THE PATIENT'S POST-OP BEST-CORRECTED VISUAL ACUITY WAS 20/24._x000D_ Manufacturer Narrativ…	Lens Extraction	Resolved
https://www.accessdata.fda.gov/scripts/cdrh/cfdocs/cfMAUDE/Detail.CFM?MDRFOI__ID=10335509&pc=MTA	2023826-2020-01564	2020-07-02	Injury	STAAR SURGICAL COMPANY	2020-07-28	MTA	IMPLANTABLE COLLAMER LENS (ICL)	Inadequacy of Device Shape and/or Size	Headache; Nausea; Pain; Blurred Vision; No Code Available	N/A	NA	1	Event Description: THE REPORTER INDICATED THE SURGEON IMPLANTED A 13.2MM VICM5_13.2 IMPLANTABLE COLLAMER LENS, -12.50 DIOPTER, IN THE PATIENTS LEFT EYE (OS), ON (B)(6) 2020. THE LENS HAD EXCESSIVE VAULTING, SIGNIFICANT REDUCTION OF ICA AND PIGMENT DISPERSION. THE PATIENT EXPERIENCED EYE PAIN, BLURRING OF VISION AND NAUSEA. THE LENS REMAINS IMPLANTED. THE CAUSE OF THE EVENT WAS UNKNOWN. ADDITIONAL…	Lens Exchange	Resolved
https://www.accessdata.fda.gov/scripts/cdrh/cfdocs/cfMAUDE/Detail.CFM?MDRFOI__ID=8671658&pc=MTA	2023826-2019-01019	2015-11-12	Injury	STAAR SURGICAL COMPANY	2019-06-05	MTA	IMPLANTABLE COLLAMER LENS	Adverse Event Without Identified Device or Use Problem	Headache; Nausea; Pain; Red Eye(s); Blurred Vision; Burning Sensation; No Code Available	NA	NA	1	Event Description: THE REPORTER INDICATED THAT THE SURGEON IMPLANTED A 13.2MM VICMO13.2 IMPLANTABLE COLLAMER LENS, -12.5 DIOPTER INTO THE PATIENT'S RIGHT EYE (OD) IN (B)(6) 2015. THE SURGEON REPORTS PIGMENT DISPERSION, RED EYE, AND PERMANENT EYE PAIN SINCE IMPLANTATION. THE CAUSE OF THE EVENT IS REPORTED AS UNKNOWN, HOWEVER THE SURGEON THINKS THE FOOTPLATES OF THE ICL SEEM TO BE LOW, PLACED ON/IN…	Lens Retention + Secondary Operation	Unknown
https://www.accessdata.fda.gov/scripts/cdrh/cfdocs/cfMAUDE/Detail.CFM?MDRFOI__ID=9257758&pc=MTA	2023826-2019-02014	2018-09-03	Injury	STAAR SURGICAL COMPANY	2019-10-30	MTA	IMPLANTABLE COLLAMER LENS (ICL)	Adverse Event Without Identified Device or Use Problem	Headache; No Code Available	NA	NA	1	Event Description: THE REPORTER INDICATED THE SURGEON IMPLANTED A 12.1MM VICM5_12.1 IMPLANTABLE COLLAMER LENS, -12.00 DIOPTER, IN THE PATIENT'S RIGHT EYE (OD), ON (B)(6) 2018. THE LENS WAS EXPLANTED ON (B)(6) 2018 DUE TO PATIENT COMPLAINED OF A HEADACHE. THE SURGEON DID NOT IMPLANT ANOTHER LENS. THE CAUSE OF THE EVENT WAS UNKNOWN. Manufacturer Narrative: DEVICE EVALUATION: THE LENS WAS RETURNED D…	Lens Extraction	Unknown
https://www.accessdata.fda.gov/scripts/cdrh/cfdocs/cfMAUDE/Detail.CFM?MDRFOI__ID=9266062&pc=MTA	2023826-2019-02013	2018-09-03	Injury	STAAR SURGICAL COMPANY	2019-11-01	MTA	IMPLANTABLE COLLAMER LENS (ICL)	Adverse Event Without Identified Device or Use Problem	Headache; No Code Available	NA	NA	1	Event Description: THE REPORTER INDICATED THE SURGEON IMPLANTED A 12.1MM VICM5_12.1 IMPLANTABLE COLLAMER LENS, -11.00 DIOPTER, IN THE PATIENT'S LEFT EYE (OS), ON (B)(6) 2018. THE LENS WAS EXPLANTED ON (B)(6) 2018 DUE TO PATIENT COMPLAINED OF A HEADACHE. THE SURGEON DID NOT IMPLANT ANOTHER LENS. THE CAUSE OF THE EVENT WAS UNKNOWN. Manufacturer Narrative: DEVICE EVALUATION: THE LENS WAS RETURNED DR…	Lens Extraction	Unknown
https://www.accessdata.fda.gov/scripts/cdrh/cfdocs/cfMAUDE/Detail.CFM?MDRFOI__ID=5112607&pc=MTA	2023826-2015-01187	2015-04-09	Injury	STAAR SURGICAL COMPANY	2015-09-30	MTA	ICL (IMPLANTABLE COLLAMER LENS)	Appropriate Term/Code Not Available	Headache; No Code Available	NA	NA	1	Event Description: THE REPORTER INDICATED THE SURGEON IMPLANTED A 12.6MM VICMO12.6 IMPLANTABLE COLLAMER LENS, -11.00 DIOPTER IN THE PATIENT'S RIGHT EYE (OD) ON (B)(6) 2015. THE LENS WAS EXPLANTED ON (B)(6) 2015 DUE TO PATIENT SUFFERED FROM HEADACHE. NO OTHER LENS WAS IMPLANTED. SEE MFR #2023826-2015-01188 FOR LEFT EYE._x000D_ Manufacturer Narrative: METHOD: DEVICE HISTORY RECORD REVIEW. RESULTS: …	Lens Extraction	Resolved
https://www.accessdata.fda.gov/scripts/cdrh/cfdocs/cfMAUDE/Detail.CFM?MDRFOI__ID=6048731&pc=MTA	2023826-2016-01083	2016-01-26	Injury	STAAR SURGICAL COMPANY	2016-10-21	MTA	ICL (IMPLANTABLE COLLAMER LENS)	Device Operates Differently Than Expected; Appropriate Term/Code Not Available	Headache; No Code Available	NA	NA	1	Event Description: THE REPORTER INDICATED THAT THE SURGEON INSERTED A 12.6MM VICMO12.6 IMPLANTABLE COLLAMER LENS, -11.50 DIOPTER, IN THE PATIENT'S RIGHT EYE ON (B)(6) 2016. THE LENS WAS EXPLANTED ON (B)(6) 2016 DUE TO THE PATIENT EXPERIENCING HEADACHE._x000D_ Manufacturer Narrative: CORRECTED INFORMATION: (B)(4) SHOULD BE UNDER PATIENT CODE. ADDITIONAL INFORMATION: CONCLUSION CODE: PATIENT IS UND…	Lens Extraction	Resolved
https://www.accessdata.fda.gov/scripts/cdrh/cfdocs/cfMAUDE/Detail.CFM?MDRFOI__ID=6052593&pc=MTA	2023826-2016-01084	2016-01-26	Injury	STAAR SURGICAL COMPANY	2016-10-24	MTA	ICL (IMPLANTABLE COLLAMER LENS)	Device Operates Differently Than Expected; Appropriate Term/Code Not Available	Headache; No Code Available	NA	NA	1	Event Description: THE REPORTER INDICATED THAT THE SURGEON INSERTED A 12.6MM VICMO12.6 IMPLANTABLE COLLAMER LENS, -10.00 DIOPTER, IN THE PATIENT'S LEFT EYE ON (B)(6) 2016. THE LENS WAS EXPLANTED ON (B)(6) 2016 DUE TO THE PATIENT EXPERIENCING HEADACHE._x000D_ Manufacturer Narrative: (B)(4). CONCLUSION CODE: PATIENT IS UNDER THE AGE OF (B)(6) AND PER DFU FOR THIS MODEL, THIS LENS MODEL IS CONTRADIC…	Lens Extraction	Resolved
https://www.accessdata.fda.gov/scripts/cdrh/cfdocs/cfMAUDE/Detail.CFM?MDRFOI__ID=10310562&pc=MTA	2023826-2020-01501	NA	Injury	STAAR SURGICAL COMPANY	2020-07-22 04:00:00	MTA	IMPLANTABLE COLLAMER LENS (ICL)	Inadequacy of Device Shape and/or Size	Headache; No Code Available	P030016	NA	1	Event Description: THE REPORTER INDICATED THE SURGEON IMPLANTED A 13.7MM MICL13.7 IMPLANTABLE COLLAMER LENS, -10.50 DIOPTER, IN THE PATIENTS RIGHT EYE (OD) ON (B)(6) 2020. THE LENS WAS EXPLANTED ON (B)(6) 2020 DUE TO EXCESSIVE VAULTING. THE PATIENT EXPERIENCED INTERMITTENT HEADACHES. THE LENS WAS EXCHANGED FOR A SHORTER LENS AND THE PROBLEM WAS RESOLVED. THE HEADACHES HAVE BEEN RESOLVED. Manufact…	Lens Exchange	Resolved
https://www.accessdata.fda.gov/scripts/cdrh/cfdocs/cfMAUDE/Detail.CFM?MDRFOI__ID=5788401&pc=MTA	2023826-2016-00898	2016-06-07	Injury	STAAR SURGICAL COMPANY	2016-07-12	MTA	ICL (IMPLANTABLE COLLAMER LENS)	Inadequacy of Device Shape and/or Size; Appropriate Term/Code Not Available	Headache; Pain; Blurred Vision; Vomiting; No Code Available	P030016	NA	1	Event Description: THE REPORTER STATED THE SURGEON IMPLANTED A 12.6MM MICL12.6 IMPLANTABLE COLLAMER LENS, -12.0 DIOPTER, IN THE PATIENT'S LEFT EYE (OS) ON (B)(6) 2016. THE LENS WAS EXPLANTED ON (B)(6) 2016 DUE TO THE LENS BEING TOO LARGE AND HYPOTONY (LOW IOP). THE PATIENT EXPERIENCED BLURRED VISUAL ACUITY, EYE PAIN, HEADACHE, AND VOMITING. THE REPORTER INDICATED THAT THE CAUSE OF THE EVENT WAS U…	Lens Extraction	Resolved
https://www.accessdata.fda.gov/scripts/cdrh/cfdocs/cfMAUDE/Detail.CFM?MDRFOI__ID=13057261&pc=MTA	2023826-2021-04915	2021-02-08	Injury	STAAR SURGICAL COMPANY	2021-12-21	MTA	IMPLANTABLE COLLAMER LENS (ICL)	Adverse Event Without Identified Device or Use Problem	Headache; Pain; Dizziness; Appropriate Clinical Signs, Symptoms, Conditions Term / Code Not Available	NA	NA	1	Event Description: THE REPORTER INDICATED THE SURGEON IMPLANTED A 12.1MM VICMO12.1 IMPLANTABLE COLLAMER LENS, -07.00 DIOPTER, IN THE PATIENTS LEFT EYE (OS), ON (B)(6) 2021. THE LENS WAS EXPLANTED ON (B)(6) 2021 DUE TO PATIENT COMPLAINED OF EYE DISTENSION, EYE PAIN, DIZZINESS AND HEADACHE. THE PROBLEM WAS RESOLVED. THE CAUSE OF THE EVENT WAS UNKNOWN.Event Description: THE REPORTER INDICATED THE SU…	Lens Extraction	Resolved
https://www.accessdata.fda.gov/scripts/cdrh/cfdocs/cfMAUDE/Detail.CFM?MDRFOI__ID=13057173&pc=MTA	2023826-2021-04916	2021-02-09	Injury	STAAR SURGICAL COMPANY	2021-12-21	MTA	IMPLANTABLE COLLAMER LENS (ICL)	Adverse Event Without Identified Device or Use Problem	Headache; Pain; Dizziness; Appropriate Clinical Signs, Symptoms, Conditions Term / Code Not Available	NA	NA	1	Event Description: THE REPORTER INDICATED THE SURGEON IMPLANTED A 12.1MM VICMO12.1 IMPLANTABLE COLLAMER LENS, -08.00 DIOPTER, IN THE PATIENTS RIGHT EYE (OD), ON (B)(6) 2021. THE LENS WAS EXPLANTED ON (B)(6) 2021 DUE TO PATIENT COMPLAINED OF EYE DISTENSION, EYE PAIN, DIZZINESS AND HEADACHE. THE PROBLEM WAS RESOLVED. THE CAUSE OF THE EVENT WAS UNKNOWN. PATIENT IN GOOD CONDITION AFTER SURGERY.Event …	Lens Extraction	Resolved
https://www.accessdata.fda.gov/scripts/cdrh/cfdocs/cfMAUDE/Detail.CFM?MDRFOI__ID=5047711&pc=MTA	2023826-2015-01091	2015-04-25	Injury	STAAR SURGICAL COMPANY	2015-09-01	MTA	ICL (IMPLANTABLE COLLAMER LENS)	Appropriate Term/Code Not Available	Headache; Pain; No Code Available	NA	NA	1	Event Description: THE REPORTER INDICATED THE SURGEON IMPLANTED A 12.6MM VICMO12.6, -09.00 DIOPTER IMPLANTABLE COLLAMER LENS IN THE PATIENT'S RIGHT EYE (OD) ON (B)(6) 2015. THE LENS WAS EXPLANTED ON (B)(6) 2015 DUE TO PATIENT DISSATISFACTION WITH HEADACHE AND OPHTHALMODYNIA. NO OTHER LENS WAS IMPLANTED. Manufacturer Narrative: THIS PRODUCT IS MANUFACTURED IN THE U.S. BUT NOT MARKETED IN THE U.S. …	Lens Extraction	Unknown
https://www.accessdata.fda.gov/scripts/cdrh/cfdocs/cfMAUDE/Detail.CFM?MDRFOI__ID=5047815&pc=MTA	2023826-2015-01092	2015-04-25	Injury	STAAR SURGICAL COMPANY	2015-09-01	MTA	ICL (IMPLANTABLE COLLAMER LENS)	Appropriate Term/Code Not Available	Headache; Pain; No Code Available	NA	NA	1	Event Description: THE REPORTER INDICATED THE SURGEON IMPLANTED A 12.6MM VICMO12.6, -09.50 DIOPTER IMPLANTABLE COLLAMER LENS IN THE PATIENT'S LEFT EYE (OS) ON (B)(6) 2015. THE LENS WAS EXPLANTED ON (B)(6) 2015 DUE TO PATIENT DISSATISFACTION WITH HEADACHE AND OPHTHALMODYNIA. NO OTHER LENS WAS IMPLANTED. SEE MFR. # 2023826-2015-01091 FOR RIGHT EYE._x000D_ Manufacturer Narrative: THIS PRODUCT IS MAN…	Lens Extraction	Unknown
https://www.accessdata.fda.gov/scripts/cdrh/cfdocs/cfMAUDE/Detail.CFM?MDRFOI__ID=17986867&pc=MTA	2023826-2023-04600	2023-01-13	Injury	STAAR SURGICAL COMPANY	2023-10-23	MTA	IMPLANTABLE COLLAMER LENS (ICL)	Optical Problem	Headache; Visual Disturbances; Halo; Appropriate Clinical Signs, Symptoms, Conditions Term / Code Not Available	P030016	NA	1	Event Description: THE REPORTER INDICATED THAT THE SURGEON IMPLANTED A 12.1MM VICM5_12.1, -9.5 DIOPTER, IMPLANTABLE COLLAMER LENS, INTO THE PATIENT'S RIGHT EYE (OD) ON (B)(6) 2022. ON (B)(6) 2023 THE LENS WAS EXPLANTED DUE TO GLARE/HALOS, HEADACHE, AND PATIENT DISSATISFACTION. PROBLEM RESOLVED. Manufacturer Narrative: H6 - WORK ORDER SEARCH: ONE SIMILAR COMPLAINT TYPE EVENTS WERE REPORTED FOR UNI…	Lens Extraction	Resolved
https://www.accessdata.fda.gov/scripts/cdrh/cfdocs/cfMAUDE/Detail.CFM?MDRFOI__ID=6694800&pc=MTA	2023826-2017-01121	2017-05-10	Injury	STAAR SURGICAL COMPANY	2017-07-07	MTA	ICL (IMPLANTABLE COLLAMER LENS)	Device Operates Differently Than Expected	Headache; Visual Disturbances; Halo; No Code Available	N/A	NA	1	Event Description: THE REPORTER INDICATED THAT THE SURGEON IMPLANTED A 12.1MM VICMO12.1 IMPLANTABLE COLLAMER LENS, -11.5 DIOPTER, IN THE PATIENT'S RIGHT EYE (OD) ON (B)(6) 2017. THE PATIENT EXPERIENCED HEADACHE, GLARE/HALOES. ON (B)(6) 2017 THE LENS WAS EXPLANTED. THE PROBLEM WAS RESOLVED. THE CUSTOMER STATED THAT THE PATIENT DOES NOT HAVE PLAN TO EXCHANGE THE LENS. AS OF THE DAY OF MDR SUBMISSIO…	Lens Extraction	Resolved
https://www.accessdata.fda.gov/scripts/cdrh/cfdocs/cfMAUDE/Detail.CFM?MDRFOI__ID=5119129&pc=MTA	2023826-2015-01262	2015-09-01	Injury	STAAR SURGICAL COMPANY	2015-10-01	MTA	ICL (IMPLANTABLE COLLAMER LENS)	Appropriate Term/Code Not Available	Hyphema; Hypopyon; Inflammation; Irritation; Pain; Visual Impairment	P030016	NA	1	Event Description: THE REPORTER STATED THE SURGEON IMPLANTED A 13.7MM MICL13.7 IMPLANTABLE COLLAMER LENS, -11.0 DIOPTER, IN THE PATIENT'S LEFT EYE (OS) ON (B)(6) 2015. THE REPORTER STATED AT ONE DAY POST-OP ((B)(6) 2015), THE PATIENT'S EYE HAD HYPHEMA AND HYPOPHON. MEDICATIONS WERE ADMINISTERED FOR INFLAMMATION BUT THE REPORTER STATED IT LOOKED MORE LIKE AN IRRITATED IRIS. THE PATIENT WAS IN PAIN…	Lens Retention	Resolved
https://www.accessdata.fda.gov/scripts/cdrh/cfdocs/cfMAUDE/Detail.CFM?MDRFOI__ID=8504763&pc=MTA	2023826-2019-00588	2019-02-27	Malfunction	STAAR SURGICAL COMPANY	2019-04-11	MTA	IMPLANTABLE COLLAMER LENS (ICL)	Inadequacy of Device Shape and/or Size	Inflammation; Intraocular Pressure Increased	P030016	NA	1	Event Description: THE REPORTER INDICATED THAT A 12.6MM. MICL12.6, -6.0 DIOPTER, IMPLANTABLE COLLAMER LENS IS TOO LARGE FOR THE PATIENT, INCREASED EYE PRESSURE. WILL BE REPLACING WITH A SHORTER LENGTH LENS. NO PATIENT INJURY. HOWEVER, THE PATIENT LATER STATED " IF THERE WAS SOMETHING WRONG THE IMPLANT WOULD HAVE BEEN REMOVED". ADDITIONAL INFORMATION HAS BEEN REQUESTED BUT NONE HAS BEEN FORTHCOMIN…	Lens Retention	Resolved
https://www.accessdata.fda.gov/scripts/cdrh/cfdocs/cfMAUDE/Detail.CFM?MDRFOI__ID=14028818&pc=MTA	2023826-2022-01108	NA	Injury	STAAR SURGICAL COMPANY	2022-04-06 04:00:00	MTA	IMPLANTABLE COLLAMER LENS (ICL)	Off-Label Use; Adverse Event Without Identified Device or Use Problem	Inflammation; Intraocular Pressure Increased	NA	NA	1	Event Description: THE REPORTER INDICATED THAT A 12.1MM VICM5 12.1 IMPLANTABLE COLLAMER LENS OF -7.0 DIOPTER WAS IMPLANTED INTO THE PATIENTS LEFT EYE (OS) ON (B)(6) 2021. ELEVATED IOP WAS OBSERVED. THE LENS REMAINS IMPLANTED. CHRONIC INFLAMMATION IS REPORTED AND DOCTOR STILL CONTINUES TO MONITOR PATIENT WITH COMBIGAN LE. CAUSE REPORTED AS UNKNOWN. IF ADDITIONAL INFORMATION IS RECEIVED A SUPPLEMEN…	Lens Retention	Unknown
https://www.accessdata.fda.gov/scripts/cdrh/cfdocs/cfMAUDE/Detail.CFM?MDRFOI__ID=13389438&pc=MTA	2023826-2022-00352	2021-12-30	Injury	STAAR SURGICAL COMPANY	2022-01-28	MTA	IMPLANTABLE COLLAMER LENS (ICL)	Adverse Event Without Identified Device or Use Problem	Inflammation; Intraocular Pressure Increased; Appropriate Clinical Signs, Symptoms, Conditions Term / Code Not Available	NA	NA	1	Event Description: THE REPORTER INDICATED THAT THE SURGEON IMPLANTED A 12.1MM VICM5_12.1; -5.00 DIOPTER IMPLANTABLE COLLAMER LENS INTO THE PATIENT'S LEFT EYE (OS) ON (B)(6) 2021. THE PATIENT EXPERIENCED ELEVATED INTRAOCULAR PRESSURE (52MMHG) WHICH COULD NOT BE CONTROLLED WITH MAXIMAL TOPICAL ANTIGLAUCOMA +ORAL DIAMOX MEDICATION. PATIENT'S DRAINAGE ANGLE WAS HEAVILY PIGMENTED WITH PIGMENTS AND EXC…	Lens Extraction	Resolved
https://www.accessdata.fda.gov/scripts/cdrh/cfdocs/cfMAUDE/Detail.CFM?MDRFOI__ID=14030262&pc=MTA	2023826-2022-01091	2022-02-24	Injury	STAAR SURGICAL COMPANY	2022-04-06	MTA	IMPLANTABLE COLLAMER LENS (ICL)	Adverse Event Without Identified Device or Use Problem	Inflammation; Intraocular Pressure Increased; Appropriate Clinical Signs, Symptoms, Conditions Term / Code Not Available	NA	NA	1	Event Description: THE REPORTER INDICATED THE SURGEON IMPLANTED A 12.6MM VICM5_12.6 IMPLANTABLE COLLAMER LENS, -12.00 DIOPTER, IN THE PATIENTS RIGHT EYE (OD), ON (B)(6) 2021. THE LENS WAS EXPLANTED ON (B)(6) 2022 DUE TO ELEVATED INTRAOCULAR PRESSURE (IOP) AND PIGMENT DISPERSION. THE VAULT WAS NORMAL. POST-OP THERE WAS MILD INFLAMMATION IN ANTERIOR CHAMBER. IOP WAS 15MMHG AND MEDICATION WAS PRESCR…	Lens Extraction	Resolved
https://www.accessdata.fda.gov/scripts/cdrh/cfdocs/cfMAUDE/Detail.CFM?MDRFOI__ID=15506509&pc=MTA	2023826-2022-03375	2022-07-03	Injury	STAAR SURGICAL COMPANY	2022-09-29	MTA	IMPLANTABLE COLLAMER LENS (ICL)	Device Dislodged or Dislocated	Inflammation; Intraocular Pressure Increased; Appropriate Clinical Signs, Symptoms, Conditions Term / Code Not Available	P030016	NA	1	Event Description: THE REPORTER INDICATED THAT THE SURGEON IMPLANTED A 12.6MM VICM5_12.6; -5.0 DIOPTER IMPLANTABLE COLLAMER LENS INTO THE PATIENT'S LEFT EYE (OS) ON (B)(6) 2022. THE PATIENT EXPERIENCED ELEVATED IOP WITHOUT PUPIL BLOCK; PIGMENT DISPERSION AND PRO-LONGED INFLAMMATION; "11 O'CLOCK IRIS TAGS". ON (B)(6) 2022 THE LENS WAS REPOSITIONED TO FREE UP THE LENS FROM THE IRIS TOUCH AND GONIO …	Lens Repositioning	Unknown
https://www.accessdata.fda.gov/scripts/cdrh/cfdocs/cfMAUDE/Detail.CFM?MDRFOI__ID=5873864&pc=MTA	2023826-2016-01066	2016-06-18	Injury	STAAR SURGICAL COMPANY	2016-08-12	MTA	ICL (IMPLANTABLE COLLAMER LENS)	Inadequacy of Device Shape and/or Size; Device Operates Differently Than Expected; Appropriate Term/Code Not Available	Inflammation; Intraocular Pressure Increased; Blurred Vision; Halo; No Code Available	N/A	NA	1	Event Description: THE REPORTER INDICATED THAT THE SURGEON IMPLANTED A 13.7MM VICMO13.7 IMPLANTABLE COLLAMER LENS, -2.5 DIOPTER IN TO THE PATIENT'S RIGHT EYE (OD) ON (B)(6) 2016. THE LENS WAS EXPLANTED ON (B)(6) 2016 DUE TO EXCESSIVE VAULT, GLARE, HALOES, BLURRED VISION, INFLAMMATION, ANGLE CLOSURE WITH ELEVATED IOP AND VERY SHALLOW AC. THE PATIENT HAD A LOSS OF BEST CORRECTED VISUAL ACUITY. THE …	Lens Extraction + Secondary Operation	Unknown
https://www.accessdata.fda.gov/scripts/cdrh/cfdocs/cfMAUDE/Detail.CFM?MDRFOI__ID=5873698&pc=MTA	2023826-2016-01062	2016-06-18	Injury	STAAR SURGICAL COMPANY	2016-08-12	MTA	ICL (IMPLANTABLE COLLAMER LENS)	Inadequacy of Device Shape and/or Size; Appropriate Term/Code Not Available	Inflammation; Intraocular Pressure Increased; Blurred Vision; Loss of Vision; Halo; No Code Available	NA	NA	1	Event Description: THE REPORTER INDICATED THE SURGEON IMPLANTED A 13.7MM VICMO13.7 IMPLANTABLE COLLAMER LENS, -02.50 DIOPTER, IN THE PATIENT'S LEFT EYE (OS) ON (B)(6) 2016. THE LENS WAS EXPLANTED ON (B)(6) 2016 DUE TO EXCESSIVE VAULTING, SHALLOW ANTERIOR CHAMBER, ANGLE CLOSURE, WITH ELEVATED INTRAOCULAR PRESSURE AND INFLAMMATION. THE PATIENT EXPERIENCED LOSS OF BEST-CORRECTED VISUAL ACUITY, GLARE…	Lens Extraction	Resolved
https://www.accessdata.fda.gov/scripts/cdrh/cfdocs/cfMAUDE/Detail.CFM?MDRFOI__ID=7714154&pc=MTA	2023826-2018-01016	2018-06-12	Injury	STAAR SURGICAL COMPANY	2018-07-24	MTA	IMPLANTABLE COLLAMER LENS (ICL)	Inadequacy of Device Shape and/or Size	Inflammation; Intraocular Pressure Increased; Iritis; Uveitis; No Code Available	P030016	NA	1	Event Description: THE REPORTER INDICATED THE SURGEON IMPLANTED A 13.2MM MICL13.2, -13.5 DIOPTER, IMPLANTABLE COLLAMER LENS INTO THE PATIENT'S RIGHT EYE (OD) ON (B)(6) 2018. ON (B)(6) 2018 THE LENS WAS EXPLANTED DUE TO OBSERVATION OF EXCESSIVE VAULT, ELEVATED IOP (INTRAOCULAR PRESSURE) WITHOUT PUPIL BLOCK AND ANGLE CLOSURE, IRIS ATROPHY, INCREASED CELL, AND FLARE/INFLAMMATION. PATIENT WAS ON ANTI…	Lens Extraction	Resolved
https://www.accessdata.fda.gov/scripts/cdrh/cfdocs/cfMAUDE/Detail.CFM?MDRFOI__ID=4529095&pc=MTA	2023826-2015-00185	2014-12-12	Injury	STAAR SURGICAL COMPANY	2015-02-19	MTA	ICL (IMPLANTABLE COLLAMER LENS)	Appropriate Term/Code Not Available	Inflammation; Intraocular Pressure Increased; No Code Available	P030016	NA	1	Event Description: THE REPORTER INDICATED THE SURGEON IMPLANTED A 12.5MM ICM125V4 IMPLANTABLE COLLAMER LENS IN THE PATIENT'S RIGHT EYE (OD) ON (B)(6) 2014 AND THE LENS WAS EXPLANTED ON (B)(6) 2014 DUE TO ELEVATED INTRAOCULAR PRESSURE (IOP), INFLAMMATION AND POSSIBLE IRIDOCYCLITIS. THE LENS WAS NOT REPLACED AND THE PATIENT'S LAST BCVA WAS 20/15. Manufacturer Narrative: DATE OF BIRTH - UNK. PT WEIG…	Lens Exchange + Secondary Operation	Resolved
https://www.accessdata.fda.gov/scripts/cdrh/cfdocs/cfMAUDE/Detail.CFM?MDRFOI__ID=7714241&pc=MTA	2023826-2018-01017	2018-06-12	Injury	STAAR SURGICAL COMPANY	2018-07-24	MTA	IMPLANTABLE COLLAMER LENS (ICL)	Inadequacy of Device Shape and/or Size	Inflammation; Intraocular Pressure Increased; No Code Available	P030016	NA	1	Event Description: THE REPORTER INDICATED THE SURGEON IMPLANTED A 13.2MM MICL13.2, -13.0 DIOPTER, IMPLANTABLE COLLAMER LENS INTO THE PATIENT'S LEFT EYE (OS) ON (B)(6) 2018. ON (B)(6) 2018 THE LENS WAS EXPLANTED DUE TO OBSERVATION OF EXCESSIVE VAULT, ELEVATED IOP (INTRAOCULAR PRESSURE) WITHOUT PUPIL BLOCK AND ANGLE CLOSURE, INCREASED CELL, AND FLARE/INFLAMMATION. PATIENT WAS ON ANTIBIOTICS AND ANT…	Lens Extraction	Resolved
https://www.accessdata.fda.gov/scripts/cdrh/cfdocs/cfMAUDE/Detail.CFM?MDRFOI__ID=13830688&pc=MTA	2023826-2022-00880	NA	Injury	STAAR SURGICAL COMPANY	2022-03-20 04:00:00	MTA	IMPLANTABLE COLLAMER LENS (ICL)	Adverse Event Without Identified Device or Use Problem	Inflammation; Intraocular Pressure Increased; Pupillary Block; Red Eye(s); Discomfort; Appropriate Clinical Signs, Symptoms, Conditions Term / Code Not Available	NA	NA	1	Event Description: THE REPORTER INDICATED THAT THE SURGEON IMPLANTED A 12.1MM VICM5_12.1; -10.5 DIOPTER IMPLANTABLE COLLAMER LENS INTO THE PATIENT'S LEFT EYE (OS) ON (B)(6) 2021. THE PATIENT EXPERIENCED ANGLE CLOSURE WITH ELEVATED INTRAOCULAR PRESSURE; AC CELL++; CHRONIC INFLAMMATION; PUPIL BLOCK; DISCOMFORT AND RED EYE; OVER A PERIOD OF TIME AFTER IMPLANTATION; MULTIPLE MEDICATIONS WERE ALSO PRE…	Lens Retention + Secondary Operation	Resolved
https://www.accessdata.fda.gov/scripts/cdrh/cfdocs/cfMAUDE/Detail.CFM?MDRFOI__ID=14710489&pc=MTA	2023826-2022-01917	2022-03-14	Injury	STAAR SURGICAL COMPANY	2022-06-16	MTA	IMPLANTABLE COLLAMER LENS (ICL)	Patient Device Interaction Problem	Inflammation; Intraocular Pressure Increased; Red Eye(s)	P030016	NA	1	Event Description: THE REPORTER INDICATED THAT A 13.2MM VICM5 13.2 IMPLANTABLE COLLAMER LENS OF -8.0 DIOPTER WAS IMPLANTED INTO THE PATIENTS RIGHT EYE (OD) ON (B)(6) 2022. ON (B)(6) 2022 THE LENS WAS EXPLANTED DUE TO INFLAMMATION AND PIGMENT DISPERSION OCCURRED.; THEN STEROID EYE DROPS WERE PRESCRIBED AND INDUCED IOP. A TRABECULECTOMY WAS PERFORMED. CAUSE IS DUE TO A PATIENT RELATED FACTOR OF PIG…	Lens Extraction + Secondary Operation	Resolved
https://www.accessdata.fda.gov/scripts/cdrh/cfdocs/cfMAUDE/Detail.CFM?MDRFOI__ID=14710500&pc=MTA	2023826-2022-01918	2022-03-14	Injury	STAAR SURGICAL COMPANY	2022-06-16	MTA	IMPLANTABLE COLLAMER LENS (ICL)	Patient Device Interaction Problem	Inflammation; Intraocular Pressure Increased; Red Eye(s)	P030016	NA	1	Event Description: THE REPORTER INDICATED THAT A 12.6MM VICM5 12.6 IMPLANTABLE COLLAMER LENS OF -7.0 DIOPTER WAS IMPLANTED INTO THE PATIENTS LEFT EYE (OS) ON (B)(4) 2022. ON (B)(4) 2022 THE LENS WAS EXPLANTED DUE TO INFLAMMATION AND PIGMENT DISPERSION OCCURRED.; THEN STEROID EYE DROPS WERE PRESCRIBED AND INDUCED IOP. A TRABECULECTOMY WAS PERFORMED. CAUSE IS DUE TO A PATIENT RELATED FACTOR OF PIGM…	Lens Extraction + Secondary Operation	Resolved
https://www.accessdata.fda.gov/scripts/cdrh/cfdocs/cfMAUDE/Detail.CFM?MDRFOI__ID=8742035&pc=MTA	2023826-2019-01155	2019-05-31	Injury	STAAR SURGICAL COMPANY	2019-06-27	MTA	IMPLANTABLE COLLAMER LENS (ICL)	Inadequacy of Device Shape and/or Size	Inflammation; Intraocular Pressure Increased; Uveitis; No Code Available	P030016	NA	1	Event Description: THE REPORTER INDICATED THE SURGEON IMPLANTED A 12.6MM MICL12.6 IMPLANTABLE COLLAMER LENS, -12.5 DIOPTER, IN THE PATIENTS LEFT EYE (OS) ON (B)(6) 2019. THE LENS WAS EXPLANTED ON (B)(6) 2019 DUE TO EXCESSIVE VAULTING, PIGMENT DISPERSION AND ANTERIOR CHAMBER INFLAMMATION. THE REPORTER INDICATED THE EXCESSIVE VAULTING CAUSED PIGMENT DISPERSION (INCREASING INTRAOCULAR PRESSURE CONTR…	Lens Extraction	Resolved
https://www.accessdata.fda.gov/scripts/cdrh/cfdocs/cfMAUDE/Detail.CFM?MDRFOI__ID=8742046&pc=MTA	2023826-2019-01154	2019-05-31	Injury	STAAR SURGICAL COMPANY	2019-06-27	MTA	IMPLANTABLE COLLAMER LENS (ICL)	Inadequacy of Device Shape and/or Size	Inflammation; Intraocular Pressure Increased; Uveitis; No Code Available	P030016	NA	1	Event Description: THE REPORTER INDICATED THE SURGEON IMPLANTED A 12.6MM MICL12.6 IMPLANTABLE COLLAMER LENS, -12.0 DIOPTER, IN THE PATIENTS RIGHT EYE (OD) ON (B)(6) 2019. THE LENS WAS EXPLANTED ON (B)(6) 2019 DUE TO EXCESSIVE VAULTING, PIGMENT DISPERSION AND ANTERIOR CHAMBER INFLAMMATION. THE REPORTER INDICATED THE EXCESSIVE VAULTING CAUSED PIGMENT DISPERSION (INCREASING INTRAOCULAR PRESSURE CONT…	Lens Extraction	Resolved
https://www.accessdata.fda.gov/scripts/cdrh/cfdocs/cfMAUDE/Detail.CFM?MDRFOI__ID=9528000&pc=MTA	2023826-2019-02499	2019-10-21	Injury	STAAR SURGICAL COMPANY	2019-12-27	MTA	IMPLANTABLE COLLAMER LENS (ICL)	Adverse Event Without Identified Device or Use Problem	Inflammation; Pain; Visual Disturbances; No Code Available	P030016	NA	1	Event Description: THE PATIENT REPORTED HAD AN MICL IMPLANTABLE COLLAMER LENS, IMPLANTED IN HER LEFT EYE (OS) ON (B)(6) 2019 WITH GOOD RESULTS. THE PATIENT REPORTED ON (B)(6) 2019, AFTER A 3 HOUR FLIGHT, THERE WAS A RED RING AROUND HER LEFT EYE AND HER PUPILS WERE DIFFERENT SIZES. TWO DAYS LATER, SHE DEVELOPED PAIN AND LIGHT SENSITIVITY IN THE LEFT EYE. THE PATIENT WENT TO HER DOCTOR AND THEY SAI…	Lens Retention	Not_Resolved
https://www.accessdata.fda.gov/scripts/cdrh/cfdocs/cfMAUDE/Detail.CFM?MDRFOI__ID=14187607&pc=MTA	2023826-2022-01182	NA	Injury	STAAR SURGICAL COMPANY	2022-04-22 04:00:00	MTA	IMPLANTABLE COLLAMER LENS (ICL)	Inadequacy of Device Shape and/or Size	Inflammation; Red Eye(s); Eye Pain; Appropriate Clinical Signs, Symptoms, Conditions Term / Code Not Available	NA	NA	1	Event Description: THE REPORTER INDICATED THE SURGEON IMPLANTED A 12.1MM VICM5 12.1 IMPLANTABLE COLLAMER LENS, -08.00 DIOPTER, IN THE PATIENTS LEFT EYE (OS), ON (B)(6) 2021. THE LENS HAD LOW VAULTING AND THERE WAS PIGMENT DISPERSION. THE IOP WAS CONTROLLED WITH TOPICAL ANTIGLAUCOMA EYEDROPS. THE PATIENT HAD PIGMENT DISPERSION SYNDROME 2 WEEKS POST ICL IMPLANTATION THAT COMPLETELY RESOLVED 2 MONTH…	Lens Retention	Resolved
https://www.accessdata.fda.gov/scripts/cdrh/cfdocs/cfMAUDE/Detail.CFM?MDRFOI__ID=13317683&pc=MTA	2023826-2022-00196	2020-04-27	Injury	STAAR SURGICAL COMPANY	2022-01-21	MTA	IMPLANTABLE COLLAMER LENS (ICL)	Adverse Event Without Identified Device or Use Problem	Intraocular Pressure Increased	NA	NA	1	Event Description: THE REPORTER INDICATED THAT THE SURGEON IMPLANTED A 13.2MM VICM5_13.2 IMPLANTABLE COLLAMER LENS, -12.5 DIOPTER INTO THE PATIENT'S RIGHT EYE (OD) ON (B)(4) 2020. THE SURGEON REPORTS ELEVATED IOP; CONCOMITANT MEDICATIONS PRESCRIBED. REPORTEDLY THE PROBLEM IS RESOLVED.Event Description: THE REPORTER INDICATED THAT THE SURGEON IMPLANTED A 13.2MM VICM5_13.2 IMPLANTABLE COLLAMER LENS…	Lens Retention	Resolved
https://www.accessdata.fda.gov/scripts/cdrh/cfdocs/cfMAUDE/Detail.CFM?MDRFOI__ID=17278995&pc=MTA	2023826-2023-02608	2021-08-16	Injury	STAAR SURGICAL COMPANY	2023-07-07	MTA	IMPLANTABLE COLLAMER LENS (ICL)	Adverse Event Without Identified Device or Use Problem	Intraocular Pressure Increased	P030016	NA	1	Event Description: THE REPORTER INDICATED THAT THE SURGEON IMPLANTED A 13.2MM VICM5_13.2, -10.00 DIOPTER, IMPLANTABLE COLLAMER LENS INTO THE PATIENT'S RIGHT EYE (OD) ON (B)(6) 2021. THE LENS WAS EXPLANTED DUE TO ELEVATED IOP(51MMHG)WITHOUT PUPIL BLOCK AND ANGLE CLOSURE(ASSESSED ON (B)(6) 2021) ON (B)(6) 2023. THIS RESOLVED THE PROBLEM. CAUSE OF THE EVENT IS REPORTED AS UNKNOWN. REPORTEDLY, IOP WA…	Lens Extraction	Resolved
https://www.accessdata.fda.gov/scripts/cdrh/cfdocs/cfMAUDE/Detail.CFM?MDRFOI__ID=17278997&pc=MTA	2023826-2023-02609	2021-08-16	Injury	STAAR SURGICAL COMPANY	2023-07-07	MTA	IMPLANTABLE COLLAMER LENS (ICL)	Adverse Event Without Identified Device or Use Problem	Intraocular Pressure Increased	P030016	NA	1	Event Description: THE REPORTER INDICATED THAT THE SURGEON IMPLANTED A 13.2MM VICM5_13.2, -10.00 DIOPTER, IMPLANTABLE COLLAMER LENS INTO THE PATIENT'S LEFT EYE (OS) ON (B)(6) 2021. THE LENS WAS EXPLANTED DUE TO ELEVATED IOP(34MMHG)WITHOUT PUPIL BLOCK AND ANGLE CLOSURE(ASSESSED ON (B)(6) 2021) ON (B)(6) 2023. THIS RESOLVED THE PROBLEM. CAUSE OF THE EVENT IS REPORTED AS UNKNOWN. REPORTEDLY, IOP WAS…	Lens Extraction	Resolved
https://www.accessdata.fda.gov/scripts/cdrh/cfdocs/cfMAUDE/Detail.CFM?MDRFOI__ID=12840569&pc=MTA	2023826-2021-04398	2021-11-03	Injury	STAAR SURGICAL COMPANY	2021-11-18	MTA	IMPLANTABLE COLLAMER LENS (ICL)	Adverse Event Without Identified Device or Use Problem	Intraocular Pressure Increased	N/A	NA	1	Event Description: THE REPORTER INDICATED THE SURGEON IMPLANTED A 13.2MM VICM5_13.2 IMPLANTABLE COLLAMER LENS, -10.5 DIOPTER INTO THE PATIENT'S RIGHT EYE (OD) ON (B)(6) 2021. THE SURGEON REPORTS ELEVATED IOP. REPORTEDLY A WASHOUT WAS PERFORMED, DIAMOX, IOPIDINE, AND IATANOPROST WERE PRESCRIBED. STEROID TREATMENT WAS STOPPED AND NSAID (BROMEGENAC) WAS STARTED WHICH LOWERED THE IOP INITIALLY BUT IT…	Lens Extraction	Unknown
https://www.accessdata.fda.gov/scripts/cdrh/cfdocs/cfMAUDE/Detail.CFM?MDRFOI__ID=12840585&pc=MTA	2023826-2021-04399	2021-11-03	Injury	STAAR SURGICAL COMPANY	2021-11-18	MTA	IMPLANTABLE COLLAMER LENS (ICL)	Adverse Event Without Identified Device or Use Problem	Intraocular Pressure Increased	N/A	NA	1	Event Description: THE REPORTER INDICATED THE SURGEON IMPLANTED A 13.2MM VICM5_13.2 IMPLANTABLE COLLAMER LENS, -11.0 DIOPTER INTO THE PATIENT'S LEFT EYE (OS) ON (B)(6) 2021. THE SURGEON REPORTS ELEVATED IOP. REPORTEDLY A WASHOUT WAS PERFORMED, DIAMOX, IOPIDINE, AND IATANOPROST WERE PRESCRIBED. STEROID TREATMENT WAS STOPPED AND NSAID (BROMEGENAC) WAS STARTED WHICH LOWERED THE IOP INITIALLY BUT IT …	Lens Extraction	Unknown
https://www.accessdata.fda.gov/scripts/cdrh/cfdocs/cfMAUDE/Detail.CFM?MDRFOI__ID=16200099&pc=MTA	2023826-2023-00234	2022-08-23	Injury	STAAR SURGICAL COMPANY	2023-01-18	MTA	IMPLANTABLE COLLAMER LENS (ICL)	Adverse Event Without Identified Device or Use Problem	Intraocular Pressure Increased	P030016	NA	1	Event Description: THE REPORTER INDICATED THAT THE SURGEON IMPLANTED A 12.6MM VICMO12.6; -16.5 DIOPTER IMPLANTABLE COLLAMER LENS INTO THE PATIENT'S RIGHT EYE (OD) ON (B)(6) 2022. THE PATIENT EXPERIENCED ELEVATED INTRAOCULAR PRESSURE OF 39 MMHG. ON (B)(6) 2022 THE LENS WAS EXPLANTED AND THIS RESOLVED THE PROBLEM. THE CAUSE OF THE EVENT WAS REPORTED AS UNKNOWN. Manufacturer Narrative: LENS WORK ORD…	Lens Extraction	Resolved
https://www.accessdata.fda.gov/scripts/cdrh/cfdocs/cfMAUDE/Detail.CFM?MDRFOI__ID=16464622&pc=MTA	2023826-2023-00764	2022-08-23	Injury	STAAR SURGICAL COMPANY	2023-03-01	MTA	IMPLANTABLE COLLAMER LENS (ICL)	Adverse Event Without Identified Device or Use Problem	Intraocular Pressure Increased	P030016	NA	1	Event Description: THE REPORTER INDICATED THAT THE SURGEON IMPLANTED A 12.6MM VICMO12.6; -16.5 DIOPTER IMPLANTABLE COLLAMER LENS INTO THE PATIENT'S LEFT EYE (OS) ON (B)(6) 2022. THE SURGEON REPORTS ELEVATED INTRAOCULAR PRESSURE 35 MMHG; WITHOUT PUPIL BLOCK AND ANGLE CLOSURE. ON (B)(6) 2022 THE LENS WAS EXPLANTED AND THE PROBLEM WAS RESOLVED. THE SURGEON NOTES "THE PATIENT DID NOT WANT TO UNDERGO …	Lens Extraction	Resolved
https://www.accessdata.fda.gov/scripts/cdrh/cfdocs/cfMAUDE/Detail.CFM?MDRFOI__ID=17672709&pc=MTA	2023826-2023-03650	2023-01-17	Injury	STAAR SURGICAL COMPANY	2023-09-01	MTA	IMPLANTABLE COLLAMER LENS (ICL)	Adverse Event Without Identified Device or Use Problem	Intraocular Pressure Increased	P030016	NA	1	Event Description: THE REPORTER INDICATED THE SURGEON IMPLANTED A 12.1MM VICMO12.1 IMPLANTABLE COLLAMER LENS, -09.00 DIOPTER, IN THE PATIENTS RIGHT EYE (OD), ON (B)(6) 2021. THE LENS WAS EXPLANTED ON (B)(6) 2023 DUE TO PATIENT EXPERIENCED ELEVATED INTRAOCULAR PRESSURE (IOP). THE PATIENT WAS TREATED WITH INTRAOCULAR PRESSURE LOWERING DRUGS (CAPTOPROLOL EYE SOLUTION+BROMONIDINE EYE SOLUTION). ONE M…	Lens Extraction	Resolved
https://www.accessdata.fda.gov/scripts/cdrh/cfdocs/cfMAUDE/Detail.CFM?MDRFOI__ID=17680175&pc=MTA	2023826-2023-03651	2023-01-17	Injury	STAAR SURGICAL COMPANY	2023-09-04	MTA	IMPLANTABLE COLLAMER LENS (ICL)	Adverse Event Without Identified Device or Use Problem	Intraocular Pressure Increased	P030016	NA	1	Event Description: THE REPORTER INDICATED THE SURGEON IMPLANTED A 12.1MM VICMO12.1 IMPLANTABLE COLLAMER LENS, -10.00 DIOPTER, IN THE PATIENTS LEFT EYE (OS), ON (B)(6) 2021. THE PATIENT EXPERIENCED ELEVATED INTRAOCULAR PRESSURE (IOP) AND WAS TREATED WITH INTRAOCULAR PRESSURE LOWERING DRUGS (CAPTOPROLOL EYE SOLUTION+BROMONIDINE EYE SOLUTION). ONE MONTH AFTER SURGERY, THE IOP WAS 25.0MMHG. AFTER ADD…	Lens Retention	Resolved
https://www.accessdata.fda.gov/scripts/cdrh/cfdocs/cfMAUDE/Detail.CFM?MDRFOI__ID=17581257&pc=MTA	2023826-2023-03593	2023-06-23	Injury	STAAR SURGICAL COMPANY	2023-08-20	MTA	IMPLANTABLE COLLAMER LENS (ICL)	Adverse Event Without Identified Device or Use Problem	Intraocular Pressure Increased	P030016	NA	1	Event Description: THE REPORTER INDICATED THAT A 13.2MM VICM5_13.2 IMPLANTABLE COLLAMER LENS OF -8.00 DIOPTER WAS IMPLANTED INTO THE PATIENT'S LEFT EYE (OS) .ELEVATED IOP WAS OBSERVED. IT WAS REPORTED THAT ON (B)(6) 2023 THE LENS WAS ROTATED VERTICALLY AND THE PROBLEM RESOLVED. SURGEON STATES " DOING GREAT, OFF ALL DROPS". CAUSE OF EVENT WAS UNKNOWN. Manufacturer Narrative: H6 - TYPE OF INVESTIGA…	Lens Repositioning	Resolved
https://www.accessdata.fda.gov/scripts/cdrh/cfdocs/cfMAUDE/Detail.CFM?MDRFOI__ID=17581260&pc=MTA	2023826-2023-03592	2023-06-23	Injury	STAAR SURGICAL COMPANY	2023-08-20	MTA	IMPLANTABLE COLLAMER LENS (ICL)	Adverse Event Without Identified Device or Use Problem	Intraocular Pressure Increased	P030016	NA	1	Event Description: THE REPORTER INDICATED THAT A 13.2MM VICM5_13.2 IMPLANTABLE COLLAMER LENS OF _7.50 DIOPTER WAS IMPLANTED INTO THE PATIENT'S RIGHT EYE (OD) .ELEVATED IOP WAS OBSERVED. IT WAS REPORTED THAT ON (B)(6) 2023 THE LENS WAS ROTATED VERTICALLY AND THE PROBLEM RESOLVED. SURGEON STATES " LOOKS GREAT, BELOW BASELINE, OFF ALL DROPS". CAUSE OF EVENT WAS UNKNOWN. Manufacturer Narrative: H6 - …	Lens Repositioning	Resolved
https://www.accessdata.fda.gov/scripts/cdrh/cfdocs/cfMAUDE/Detail.CFM?MDRFOI__ID=17777978&pc=MTA	2023826-2023-04108	2023-07-15	Injury	STAAR SURGICAL COMPANY	2023-09-19	MTA	IMPLANTABLE COLLAMER LENS (ICL)	Adverse Event Without Identified Device or Use Problem	Intraocular Pressure Increased	P030016	NA	1	Event Description: THE REPORTER INDICATED THAT A 12.6MM VICMO12.6 IMPLANTABLE COLLAMER LENS OF -13.50 DIOPTER WAS IMPLANTED INTO THE PATIENTS LEFT EYE (OS) ON (B)(6) 2022. ON (B)(6) 2023 THE LENS WAS EXPLANTED DUE TO ELEVATED INTRAOCULAR PRESSURE. THE REPORTER STATED " PREOPERATIVE BASAL IOP WAS HIGHER THAN NORMAL, AND NO FURTHER EXAMINATION WAS PERFORMED TO EXCLUDE GLAUCOMA. AFTER THE CRYSTAL IS…	Lens Extraction	Resolved
https://www.accessdata.fda.gov/scripts/cdrh/cfdocs/cfMAUDE/Detail.CFM?MDRFOI__ID=18346570&pc=MTA	2023826-2023-05625	2023-10-26	Injury	STAAR SURGICAL COMPANY	2023-12-18	MTA	IMPLANTABLE COLLAMER LENS (ICL)	Adverse Event Without Identified Device or Use Problem	Intraocular Pressure Increased	P030016	NA	1	Event Description: THE REPORTER INDICATED THAT THE SURGEON IMPLANTED A 12.1MM VICMO12.1, -7.5 DIOPTER, IMPLANTABLE COLLAMER LENS INTO THE PATIENT'S LEFT EYE (OS) ON (B)(6) 2023. THE LENS WAS EXPLANTED DUE TO ELEVATED IOP (30MMHG) WITHOUT PUPIL BLOCK AND ANGLE CLOSURE(ASSESED ON 26/OCT/2023) ON (B)(6) 2023. THIS RESOLVED THE PROBLEM. CAUSE OF THE EVENT IS REPORTED AS UNKNOWN. Manufacturer Narrativ…	Lens Extraction	Resolved
https://www.accessdata.fda.gov/scripts/cdrh/cfdocs/cfMAUDE/Detail.CFM?MDRFOI__ID=18437835&pc=MTA	2023826-2024-00032	2023-12-07	Injury	STAAR SURGICAL COMPANY	2024-01-03	MTA	IMPLANTABLE COLLAMER LENS (ICL)	Adverse Event Without Identified Device or Use Problem	Intraocular Pressure Increased	P030016	NA	1	Event Description: THE REPORTER INDICATED THAT A 12.6MM VICM512.6 IMPLANTABLE COLLAMER LENS OF -4.5 DIOPTER WAS IMPLANTED INTO THE PATIENT'S LEFT EYE (OS) ON (B)(6) 2023. ON (B)(6) 2023, ELEVATED IOP WITHOUT PUPIL BLOCK WAS OBSERVED. ON (B)(6) 2023, THE LENS WAS REMOVED. REPORTEDLY, "LEFT EYE ANTERIOR CHAMBER STILL HAS DENCE AC CELLS AND INV PIGMENTS DESPITE FREQUENT TOMZAL STERIOD." CAUSE OF THE…	Lens Extraction	Resolved
https://www.accessdata.fda.gov/scripts/cdrh/cfdocs/cfMAUDE/Detail.CFM?MDRFOI__ID=13488086&pc=MTA	2023826-2022-00427	NA	Injury	STAAR SURGICAL COMPANY	2022-02-08 05:00:00	MTA	IMPLANTABLE COLLAMER LENS (ICL)	Adverse Event Without Identified Device or Use Problem	Intraocular Pressure Increased	NA	NA	1	Event Description: THE REPORTER INDICATED THAT A 12.6MM MICL12.6; -8.5 DIOPTER IMPLANTABLE COLLAMER LENS WAS IMPLANTED INTO A PATIENT'S EYE. THE PATIENT HAD INTRAOCULAR PRESSURE SPIKES AND THE SURGEON HAD TO PERFORMED AN EMERGENCY PERIPHERAL IRIDOTOMY. IT WAS ALSO NOTED THEY BELIEVE THE LENS IS TOO LARGE FOR THE PATIENT'S EYE AND CALCULATIONS WILL BE PERFORMED TO ORDER A NEW LENS SIZE BEFORE IMPL…	Lens Exchange	Unknown
https://www.accessdata.fda.gov/scripts/cdrh/cfdocs/cfMAUDE/Detail.CFM?MDRFOI__ID=15221421&pc=MTA	2023826-2022-02751	2022-07-15	Injury	STAAR SURGICAL COMPANY	2022-08-12	MTA	IMPLANTABLE COLLAMER LENS (ICL)	Adverse Event Without Identified Device or Use Problem; No Apparent Adverse Event	Intraocular Pressure Increased	P030016	NA	1	Event Description: THE REPORTER INDICATED THAT A 12.6MM VICM512.6 IMPLANTABLE COLLAMER LENS OF -6.5 DIOPTER WAS IMPLANTED INTO THE PATIENT'S RIGHT EYE (OD) ON 25-MAY-2022. ON 07-JUL-2022: ELEVATED IOP 50MMHG, PIGMENT DISPERSION, AND PRO-LONGED INFLAMMATION WAS RECORDED. THE LENS REMAINS IMPLANTED. CAUSE OF THE EVENT IS UNKNOWN. Manufacturer Narrative: B5 - LENS WAS EXPLANTED ON (B)(6) 2022. PROBL…	Lens Extraction	Resolved
https://www.accessdata.fda.gov/scripts/cdrh/cfdocs/cfMAUDE/Detail.CFM?MDRFOI__ID=14092478&pc=MTA	2023826-2022-01113	NA	Injury	STAAR SURGICAL COMPANY	2022-04-13 04:00:00	MTA	IMPLANTABLE COLLAMER LENS (ICL)	Appropriate Term/Code Not Available	Intraocular Pressure Increased	NA	NA	1	Event Description: THE REPORTER INDICATED THAT A 12.6MM MICL 12.6 IMPLANTABLE COLLAMER LENS OF -12.5 DIOPTER WAS IMPLANTED INTO THE PATIENT'S LEFT EYE (OS) ON (B)(6) 2022. ON (B)(6) 2022 THE LENS WAS EXPLANTED DUE TO PRESSURE. "PRESSURE IS CONTROLLED UNDER MAXIMUM MEDS IN ONE EYE AND THE OTHER EYE STILL HAS PRESSURE OF 34 DEGREES UNDER MAXIMUM MEDS." NO FURTHER INFORMATION HAS BEEN PROVIDED. ATTE…	Lens Retention	Unknown
https://www.accessdata.fda.gov/scripts/cdrh/cfdocs/cfMAUDE/Detail.CFM?MDRFOI__ID=14092585&pc=MTA	2023826-2022-01112	NA	Injury	STAAR SURGICAL COMPANY	2022-04-13 04:00:00	MTA	IMPLANTABLE COLLAMER LENS (ICL)	Appropriate Term/Code Not Available	Intraocular Pressure Increased	NA	NA	1	Event Description: THE REPORTER INDICATED THAT A 12.6MM MICL 12.6 IMPLANTABLE COLLAMER LENS OF -9.5 DIOPTER WAS IMPLANTED INTO THE PATIENT'S RIGHT EYE (OD) ON (B)(6) 2022. ON (B)(6) 2022 THE LENS WAS EXPLANTED DUE TO PRESSURE. "PRESSURE IS CONTROLLED UNDER MAXIMUM MEDS IN ONE EYE AND THE OTHER EYE STILL HAS PRESSURE OF 34 DEGREES UNDER MAXIMUM MEDS." NO FURTHER INFORMATION HAS BEEN PROVIDED. ATTE…	Lens Retention	Unknown
https://www.accessdata.fda.gov/scripts/cdrh/cfdocs/cfMAUDE/Detail.CFM?MDRFOI__ID=6505274&pc=MTA	2023826-2017-00666	2017-03-08	Injury	STAAR SURGICAL COMPANY	2017-04-19	MTA	IMPLANTABLE COLLAMER LENS (ICL)	Device Operates Differently Than Expected	Intraocular Pressure Increased	NA	NA	1	Event Description: THE REPORTER INDICATED THAT THE SURGEON IMPLANTED A 13.2MM VICMO13.2 IMPLANTABLE COLLAMER LENS, -18.00 DIOPTER, INTO THE PATIENT'S LEFT EYE (OS) ON (B)(6) 2017. ON (B)(6) 2017, THE PATIENT BEGAN TO EXPERIENCE ELEVATED IOP. THE SURGEON STATED THAT HE BELIEVED THE HIGH IOP WAS CAUSED BY THE PATIENT'S STEROID (DEXAMETHASONE) TREATMENT. TO DATE, THE LENS REMAINS IMPLANTED. SURGEON …	Lens Retention	Resolved
https://www.accessdata.fda.gov/scripts/cdrh/cfdocs/cfMAUDE/Detail.CFM?MDRFOI__ID=6641024&pc=MTA	2023826-2017-00975	2017-05-17	Injury	STAAR SURGICAL COMPANY	2017-06-14	MTA	ICL (IMPLANTABLE COLLAMER LENS)	Device Operates Differently Than Expected	Intraocular Pressure Increased	N/A	NA	1	Event Description: THE REPORTER INDICATED THAT THE SURGEON IMPLANTED A 12.1MM VICM5_12.1 IMPLANTABLE COLLAMER LENS, -14 DIOPTER, IN THE PATIENT'S RIGHT EYE (OD) ON (B)(6) 2017. THE PATIENT EXPERIENCED ELEVATED IOP. THE REPORTER ALSO MENTIONED THAT THE SURGEON CHANGED THE MEDICATIONS EYEDROPS WITHOUT CORTISONE TO FIND OUT IF THE HIGH IOP IS THE OUTCOME OF GIVING CORTISONE EYEDROPS. AS OF THE DATE …	Lens Retention	Resolved
https://www.accessdata.fda.gov/scripts/cdrh/cfdocs/cfMAUDE/Detail.CFM?MDRFOI__ID=6632436&pc=MTA	2023826-2017-00940	NA	Injury	STAAR SURGICAL COMPANY	2017-06-09	MTA	IMPLANTABLE COLLAMER LENS (ICL)	Device Operates Differently Than Expected	Intraocular Pressure Increased	P030016	NA	1	Event Description: THE REPORTER STATED THAT A 13.2MM MICL 13.2 IMPLANTABLE COLLAMER LENS, -6.5 DIOPTER, WAS EXPLANTED DUE TO PATIENTS INTRAOCULAR PRESSURE BEING HIGH. THE REPORTER INDICATED THAT THE EVENT CAUSE COULD BE DUE TO THE LENS BEING BIG. ADDITIONAL INFORMATION WAS REQUESTED BUT NONE HAS BEEN FORTHCOMING. IF ADDITIONAL INFORMATION IS RECEIVED A SUPPLEMENTAL MEDWATCH REPORT WILL BE SUBMITT…	Lens Extraction	Resolved
https://www.accessdata.fda.gov/scripts/cdrh/cfdocs/cfMAUDE/Detail.CFM?MDRFOI__ID=6952443&pc=MTA	2023826-2017-01570	NA	Injury	STAAR SURGICAL COMPANY	2017-10-16	MTA	IMPLANTABLE COLLAMER LENS (ICL)	Device Operates Differently Than Expected	Intraocular Pressure Increased	P030016	NA	1	Event Description: THE REPORTER INDICATED THAT THE SURGERY IMPLANTED A MICL12.6, -10.0 DIOPTER, IMPLANTABLE COLLAMER LENS IN THE PATIENT'S LEFT EYE (OS) ON (B)(6) 2017. THREE WEEKS AFTER THE IMPLANTATION, THE IOP WAS NOTED TO BE 29. THE IOP WAS SLIGHTLY ASYMMETRIC A WEEK PRIOR BY 5 BUT WITHIN THE NORMAL LIMITS. GONIOSCOPY WAS COMPLETELY OPEN. THE VAULT WAS 400. THE PI'S WERE PATENT AND FUNCTIONIN…	Lens Retention + Secondary Operation	Resolved
https://www.accessdata.fda.gov/scripts/cdrh/cfdocs/cfMAUDE/Detail.CFM?MDRFOI__ID=5981810&pc=MTA	2023826-2016-01321	2016-04-18	Injury	STAAR SURGICAL COMPANY	2016-09-27	MTA	ICL (IMPLANTABLE COLLAMER LENS)	Inadequacy of Device Shape and/or Size	Intraocular Pressure Increased	NA	NA	1	Event Description: THE REPORTER INDICATED THE SURGEON IMPLANTED A 13.2 MM VICMO 13.2 IMPLANTABLE COLLAMER LENS - -13.0 DIOPTER, IN THE PATIENT'S RIGHT EYE (OD) ON (B)(6) 2016. THE LENS WAS EXPLANTED ON (B)(6) 2016 DUE TO EXCESSIVE VAULTING. THE LENS WAS EXCHANGED FOR A SHORTER LENS AND THE PROBLEM WAS RESOLVED. THE PATIENT'S POST-OP BEST CORRECTED VISUAL ACUITY WAS 20/25._x000D_ Manufacturer Narr…	Lens Exchange	Resolved
https://www.accessdata.fda.gov/scripts/cdrh/cfdocs/cfMAUDE/Detail.CFM?MDRFOI__ID=13361443&pc=MTA	2023826-2022-00301	2020-02-12	Injury	STAAR SURGICAL COMPANY	2022-01-26	MTA	IMPLANTABLE COLLAMER LENS (ICL)	Inadequacy of Device Shape and/or Size	Intraocular Pressure Increased	NA	NA	1	Event Description: THE REPORTER INDICATED THAT A 12.1 VICM5 12.1 IMPLANTABLE COLLAMER LENS OF -13.0 DIOPTER WAS IMPLANTED INTO THE PATIENTS RIGHT EYE (OD) ON (B)(6) 2018. ON (B)(6) 2021 THE LENS WAS EXCHANGED FOR A LONGER LENGTH LENS DUE TO LOW VAULT. THE EXCHANGE RESOLVED THE PROBLEM.Event Description: THE REPORTER INDICATED THAT A 12.1 VICM5 12.1 IMPLANTABLE COLLAMER LENS OF -13.0 DIOPTER WAS I…	Lens Exchange	Resolved
https://www.accessdata.fda.gov/scripts/cdrh/cfdocs/cfMAUDE/Detail.CFM?MDRFOI__ID=10634642&pc=MTA	2023826-2020-02293	2020-08-07	Injury	STAAR SURGICAL COMPANY	2020-10-06	MTA	IMPLANTABLE COLLAMER LENS (ICL)	Inadequacy of Device Shape and/or Size	Intraocular Pressure Increased	NA#S-P#NA	NA	1	Event Description: THE REPORTER INDICATED THE SURGEON IMPLANTED A 13.2MM VICMO13.2 IMPLANTABLE COLLAMER LENS, -08.00 DIOPTER, IN THE PATIENTS RIGHT EYE (OD), ON (B)(6) 2020. THE LENS WAS EXPLANTED LATER THAT SAME DAY DUE TO EXCESSIVE VAULTING AND ELEVATED INTRAOCULAR PRESSURE. THE LENS WAS EXCHANGED FOR A SHORTER LENS AND THE PROBLEM WAS RESOLVED. THE CAUSE OF THE EVENT WAS UNKNOWN. Manufacturer …	Lens Exchange	Resolved
https://www.accessdata.fda.gov/scripts/cdrh/cfdocs/cfMAUDE/Detail.CFM?MDRFOI__ID=13295627&pc=MTA	2023826-2022-00213	2020-12-22	Injury	STAAR SURGICAL COMPANY	2022-01-19	MTA	IMPLANTABLE COLLAMER LENS (ICL)	Inadequacy of Device Shape and/or Size	Intraocular Pressure Increased	NA	NA	1	Event Description: THE REPORTER INDICATED THAT A 13.7MM VICMO 13.7 IMPLANTABLE COLLAMER LENS OF -10.0 DIOPTER WAS IMPLANTED INTO THE PATIENTS LEFT EYE (OS) ON (B)(6) 2020. ON THE SAME DAY DIFFERENT SURGERY THE LENS WAS EXCHANGED FOR A SHORTER LENGTH LENS DUE TO EXCESSIVE VAULT. THE EXCHANGE RESOLVED THE PROBLEM. CAUSE IS REPORTED AS UNKNOWN.Event Description: THE REPORTER INDICATED THAT A 13.7MM …	Lens Exchange	Resolved
https://www.accessdata.fda.gov/scripts/cdrh/cfdocs/cfMAUDE/Detail.CFM?MDRFOI__ID=13941313&pc=MTA	2023826-2022-00951	2021-01-12	Injury	STAAR SURGICAL COMPANY	2022-03-29	MTA	IMPLANTABLE COLLAMER LENS (ICL)	Inadequacy of Device Shape and/or Size	Intraocular Pressure Increased	NA	NA	1	Event Description: THE REPORTER INDICATED THAT A 13.2MM MICL 13.2 OF -8.5 DIOPTER WAS IMPLANTED INTO THE PATIENT'S LEFT EYE (OS) ON (B)(6) 2020. ON (B)(6) 2022 THE LENS WAS EXCHANGED FOR A SHORTER LENGTH LENS DUE TO EXCESSIVE VAULT AND ELEVATED IOP. THE REPLACEMENT LENS RESOLVED THE PROBLEM. CAUSE REPORTED AS DEVICE. "HIGH VAULT DESPITE APPROPRIATELY SIZED ICL BASED ON WTW. Manufacturer Narrative…	Lens Exchange	Resolved
https://www.accessdata.fda.gov/scripts/cdrh/cfdocs/cfMAUDE/Detail.CFM?MDRFOI__ID=11822759&pc=MTA	2023826-2021-01436	2021-02-26	Injury	STAAR SURGICAL COMPANY	2021-05-13	MTA	IMPLANTABLE COLLAMER LENS (ICL)	Inadequacy of Device Shape and/or Size	Intraocular Pressure Increased	NA	NA	1	Event Description: THE REPORTER INDICATED THAT A 13.7MM ,VICM5_13.7, -13.00 DIOPTER, IMPLANTABLE COLLAMER LENS WAS IMPLANTED INTO THE PATIENTS LEFT EYE (OS) ON (B)(6) 2020. ON (B)(6) 2021 THE LENS WAS EXPLANTED DUE TO EXCESSIVE VAULT AND ELEVATED IOP. A SHORTER LENGTH LENS WAS LATER IMPLANTED AND THE PROBLEM RESOLVED. CAUSE OF EVENT WAS REPORTED TO BE OTHER: " WRONG LENGTH OF LENS. YES BECAUSE TH…	Lens Exchange	Resolved
https://www.accessdata.fda.gov/scripts/cdrh/cfdocs/cfMAUDE/Detail.CFM?MDRFOI__ID=12119262&pc=MTA	2023826-2021-02299	2021-03-14	Injury	STAAR SURGICAL COMPANY	2021-07-05	MTA	IMPLANTABLE COLLAMER LENS (ICL)	Inadequacy of Device Shape and/or Size	Intraocular Pressure Increased	N/A	NA	1	Event Description: THE REPORTER INDICATED THE SURGEON IMPLANTED A 12.6MM VICMO12.6 IMPLANTABLE COLLAMER LENS, DIOPTER -8.5 INTO THE PATIENT'S RIGHT EYE (OD) ON (B)(6) 2021. ON THE SAME DATE IN A SEPARATE SURGERY THE LENS WAS EXPLANTED AND THEN REPLACED WITH A SHORTER LENS DUE TO EXCESSIVE VAULT AND ELEVATED IOP. THE PROBLEM WAS RESOLVED. THE CAUSE OF THE EVENT IS REPORTED AS UNKNOWN. Manufacturer…	Lens Exchange	Resolved
https://www.accessdata.fda.gov/scripts/cdrh/cfdocs/cfMAUDE/Detail.CFM?MDRFOI__ID=12233847&pc=MTA	2023826-2021-02882	2021-04-20	Injury	STAAR SURGICAL COMPANY	2021-07-27	MTA	IMPLANTABLE COLLAMER LENS (ICL)	Inadequacy of Device Shape and/or Size	Intraocular Pressure Increased	N/A	NA	1	Event Description: THE REPORTER INDICATED THAT THE SURGEON IMPLANTED A 13.2MM VICMO13.2, -12.00 DIOPTER, IMPLANTABLE COLLAMER LENS INTO THE PATIENT'S LEFT EYE (OS) ON (B)(6) 2021. THE LENS WAS REMOVED AND REPLACED WITH A SHORTER LENGTH LENS DUE TO ELEVATED IOP (23MMHG) WITH OUT PUPIL BLOCK AND ANGLE CLOSURE (ASSESSED ON (B)(6) 2021) AND EXCESSIVE VAULT ON (B)(6) 2021. THIS RESOLVED THE PROBLEM. C…	Lens Exchange	Resolved
https://www.accessdata.fda.gov/scripts/cdrh/cfdocs/cfMAUDE/Detail.CFM?MDRFOI__ID=16917178&pc=MTA	2023826-2023-01761	2021-04-23	Injury	STAAR SURGICAL COMPANY	2023-05-12	MTA	IMPLANTABLE COLLAMER LENS (ICL)	Inadequacy of Device Shape and/or Size	Intraocular Pressure Increased	P030016	NA	1	Event Description: THE REPORTER INDICATED THAT A 12.6MM VICM5_12.6 IMPLANTABLE COLLAMER LENS -12.50 DIOPTER WAS IMPLANTED INTO THE PATIENT'S LEFT EYE (OS) ON (B)(6) 2021. ON (B)(6) 2021 THE LENS WAS EXCHANGED FOR A SHORTER LENGTH LENS DUE TO EXCESSIVE VAULT AND ELEVATED INTRAOCULAR PRESSURE THE EXCHANGE RESOLVED THE PROBLEM. Manufacturer Narrative: CLAIM# (B)(4).	Lens Exchange	Resolved
https://www.accessdata.fda.gov/scripts/cdrh/cfdocs/cfMAUDE/Detail.CFM?MDRFOI__ID=11939026&pc=MTA	2023826-2021-01671	2021-05-11	Injury	STAAR SURGICAL COMPANY	2021-06-04	MTA	IMPLANTABLE COLLAMER LENS (ICL)	Inadequacy of Device Shape and/or Size	Intraocular Pressure Increased	P030016	NA	1	Event Description: THE REPORTER INDICATED THAT THE SURGEON IMPLANTED A 13.2MM MICL13.2, -6.5 DIOPTER, IMPLANTABLE COLLAMER LENS INTO THE PATIENT'S RIGHT EYE (OD) ON (B)(6) 2021. THE LENS WAS EXPLANTED DUE TO ELEVATED IOP (33MMHG, ASSESSED ON (B)(6) 2021) WITHOUT PUPIL BLOCK AND ANGLE CLOSURE ON (B)(6) 2021. THIS RESOLVED THE PROBLEM. CAUSE OF THE EVENT IS REPORTED AS DEVICE. REPORTEDLY, PT SYMPTO…	Lens Extraction	Resolved
https://www.accessdata.fda.gov/scripts/cdrh/cfdocs/cfMAUDE/Detail.CFM?MDRFOI__ID=12155775&pc=MTA	2023826-2021-02533	2021-06-16	Injury	STAAR SURGICAL COMPANY	2021-07-12	MTA	IMPLANTABLE COLLAMER LENS (ICL)	Inadequacy of Device Shape and/or Size	Intraocular Pressure Increased	P030016	NA	1	Event Description: THE REPORTER INDICATED THE SURGEON IMPLANTED A 13.2MM MICL13.2 IMPLANTABLE COLLAMER LENS, -09.50 DIOPTER, IN THE PATIENTS LEFT EYE (OS) ON (B)(6) 2021. THE LENS WAS REPORTED AS HAVING EXCESSIVE VAULTING WITH ELEVATED INTRAOCULAR PRESSURE (IOP). THE SURGEON PERFORMED ADDITIONAL LASER SURGERY TO THE IRIDOTOMY (ENLARGED) AND THAT RESOLVED THE ISSUE. THE PATIENT IS FINE AND THERE W…	Lens Retention + Secondary Operation	Resolved
https://www.accessdata.fda.gov/scripts/cdrh/cfdocs/cfMAUDE/Detail.CFM?MDRFOI__ID=12308409&pc=MTA	2023826-2021-03077	2021-07-19	Injury	STAAR SURGICAL COMPANY	2021-08-11	MTA	IMPLANTABLE COLLAMER LENS (ICL)	Inadequacy of Device Shape and/or Size	Intraocular Pressure Increased	N/A	NA	1	Event Description: THE REPORTER INDICATED THAT THE SURGEON IMPLANTED A 13.7MM VICM5 13.7, -09.50 DIOPTER, IMPLANTABLE COLLAMER LENS INTO THE PATIENT'S RIGHT EYE (OD) ON (B)(6) 2021. THE LENS WAS REPLACED WITH A SHORTER LENGTH LENS DUE TO ELEVATED IOP (50MMHG) WITHOUT PUPIL BLOCK AND ANGLE CLOSURE (ASSESED ON (B)(6) 2021) AND EXCESSIVE VAULT ON (B)(6) 2021. THIS RESOLVED THE PROBLEM. CAUSE OF THE …	Lens Exchange	Resolved
https://www.accessdata.fda.gov/scripts/cdrh/cfdocs/cfMAUDE/Detail.CFM?MDRFOI__ID=12399422&pc=MTA	2023826-2021-03396	2021-07-30	Injury	STAAR SURGICAL COMPANY	2021-08-31	MTA	IMPLANTABLE COLLAMER LENS (ICL)	Inadequacy of Device Shape and/or Size	Intraocular Pressure Increased	NA	NA	1	Event Description: THE REPORTER INDICATED THE SURGEON IMPLANTED A 13.7MM VICM5_13.7 IMPLANTABLE COLLAMER LENS, -10.50 DIOPTER INTO THE PATIENTS LEFT EYE (OS) ON (B)(6) 2021. THE LENS WAS REPORTED AS EXCESSIVE VAULTING AND ELEVATED INTRAOCULAR PRESSURE (IOP). THE LENS REMAINED IMPLANTED. THE PATIENT WILL BE MONITORED STRICTLY AND THE IOP HAS DECREASED SLIGHTLY DURING THE LAST WEEKS. THE CAUSE OF T…	Lens Retention	Resolved
https://www.accessdata.fda.gov/scripts/cdrh/cfdocs/cfMAUDE/Detail.CFM?MDRFOI__ID=13309724&pc=MTA	2023826-2022-00221	2021-08-31	Injury	STAAR SURGICAL COMPANY	2022-01-20	MTA	IMPLANTABLE COLLAMER LENS (ICL)	Inadequacy of Device Shape and/or Size	Intraocular Pressure Increased	NA	NA	1	Event Description: THE REPORTER INDICATED THAT A 12.1 VICM5 12.1 IMPLANTABLE COLLAMER LENS OF -10.0 DIOPTER WAS IMPLANTED INTO THE PATIENTS RIGHT EYE (OD) ON (B)(6) 2018. ON (B)(6) 2021 THE LENS WAS EXCHANGED FOR A LONGER LENGTH LENS DUE TO LOW VAULT. THE EXCHANGE RESOLVED THE PROBLEM.Event Description: THE REPORTER INDICATED THAT A 12.1 VICM5 12.1 IMPLANTABLE COLLAMER LENS OF -10.0 DIOPTER WAS I…	Lens Exchange	Resolved
https://www.accessdata.fda.gov/scripts/cdrh/cfdocs/cfMAUDE/Detail.CFM?MDRFOI__ID=13309095&pc=MTA	2023826-2022-00219	2021-11-01	Injury	STAAR SURGICAL COMPANY	2022-01-20	MTA	IMPLANTABLE COLLAMER LENS (ICL)	Inadequacy of Device Shape and/or Size	Intraocular Pressure Increased	NA	NA	1	Event Description: THE REPORTER INDICATED THAT A 12.6 VICM5 12.6 IMPLANTABLE COLLAMER LENS OF -8.50 DIOPTER WAS IMPLANTED INTO THE PATIENTS RIGHT EYE (OD) ON (B)(6) 2020. ON (B)(6) 2021 THE LENS WAS EXCHANGED FOR A LONGER LENGTH LENS DUE TO LOW VAULT. THE EXCHANGE RESOLVED THE PROBLEM. Manufacturer Narrative: CORRECTED DATA: D6A- IMPLANT DATE CORRECTED TO (B)(6) 2020. CLAIM# (B)(4). Manufacturer …	Lens Exchange	Resolved
https://www.accessdata.fda.gov/scripts/cdrh/cfdocs/cfMAUDE/Detail.CFM?MDRFOI__ID=13309644&pc=MTA	2023826-2022-00220	2021-11-01	Injury	STAAR SURGICAL COMPANY	2022-01-20	MTA	IMPLANTABLE COLLAMER LENS (ICL)	Inadequacy of Device Shape and/or Size	Intraocular Pressure Increased	NA	NA	1	Event Description: THE REPORTER INDICATED THAT A 12.6 VICM5 12.6 IMPLANTABLE COLLAMER LENS OF -10.0 DIOPTER WAS IMPLANTED INTO THE PATIENTS LEFT EYE (OS) ON (B)(6) 2020. ON (B)(6) 2021 THE LENS WAS EXCHANGED FOR A LONGER LENGTH LENS DUE TO LOW VAULT. THE EXCHANGE RESOLVED THE PROBLEM.Event Description: THE REPORTER INDICATED THAT A 12.6 VICM5 12.6 IMPLANTABLE COLLAMER LENS OF -10.0 DIOPTER WAS IM…	Lens Exchange	Resolved
https://www.accessdata.fda.gov/scripts/cdrh/cfdocs/cfMAUDE/Detail.CFM?MDRFOI__ID=13267274&pc=MTA	2023826-2022-00120	2021-11-04	Injury	STAAR SURGICAL COMPANY	2022-01-17	MTA	IMPLANTABLE COLLAMER LENS (ICL)	Inadequacy of Device Shape and/or Size	Intraocular Pressure Increased	NA	NA	1	Event Description: THE REPORTER INDICATED THAT A 13.2MM VICMO 13.2 IMPLANTABLE COLLAMER LENS OF -11.0 DIOPTER WAS IMPLANTED INTO THE PATIENTS RIGHT EYE (OD) ON (B)(6) 2021. ON (B)(6) 2021 THE LENS WAS EXCHANGED FOR A SHORTER LENGTH LENS DUE TO EXCESSIVE VAULT. THE EXCHANGE RESOLVED THE PROBLEM. CAUSE IS REPORTED AS UNKNOWN. Manufacturer Narrative: WEIGHT: UNK. ETHNICITY: UNK. RACE: UNK. THIS PROD…	Lens Exchange	Resolved
https://www.accessdata.fda.gov/scripts/cdrh/cfdocs/cfMAUDE/Detail.CFM?MDRFOI__ID=13267305&pc=MTA	2023826-2022-00121	2021-11-04	Injury	STAAR SURGICAL COMPANY	2022-01-17	MTA	IMPLANTABLE COLLAMER LENS (ICL)	Inadequacy of Device Shape and/or Size	Intraocular Pressure Increased	NA	NA	1	Event Description: THE REPORTER INDICATED THAT A 13.2MM VICMO 13.2 IMPLANTABLE COLLAMER LENS OF -11.0 DIOPTER WAS IMPLANTED INTO THE PATIENTS LEFT EYE (OS) ON (B)(6) 2021. ON (B)(6) 2021 THE LENS WAS EXCHANGED FOR A SHORTER LENGTH LENS DUE TO EXCESSIVE VAULT. THE EXCHANGE RESOLVED THE PROBLEM. CAUSE IS REPORTED AS UNKNOWN. Manufacturer Narrative: WEIGHT-RACE:UNK. PMA/510K: THIS PRODUCT IS NOT MAR…	Lens Exchange	Resolved
https://www.accessdata.fda.gov/scripts/cdrh/cfdocs/cfMAUDE/Detail.CFM?MDRFOI__ID=13256669&pc=MTA	2023826-2022-00118	2021-11-06	Injury	STAAR SURGICAL COMPANY	2022-01-13	MTA	IMPLANTABLE COLLAMER LENS (ICL)	Inadequacy of Device Shape and/or Size	Intraocular Pressure Increased	NA	NA	1	Event Description: THE REPORTER INDICATED THAT A 12.6 VICMO 12.6 IMPLANTABLE COLLAMER LENS OF -6.0 DIOPTER WAS IMPLANTED INTO THE PATIENTS LEFT EYE (OS) ON (B)(6) 2021. ON (B)(6) 2021 THE LENS WAS EXCHANGED FOR A LONGER LENGTH LENS DUE TO LOW VAULT. THE EXCHANGE RESOLVED THE PROBLEM. CAUSE REPORTED AS UNKNOWN. Manufacturer Narrative: RACE-ETHNICITY:UNK. PMA/510K: THIS PRODUCT IS NOT MARKETED IN T…	Lens Exchange	Resolved
https://www.accessdata.fda.gov/scripts/cdrh/cfdocs/cfMAUDE/Detail.CFM?MDRFOI__ID=15501957&pc=MTA	2023826-2022-03342	2022-08-18	Injury	STAAR SURGICAL COMPANY	2022-09-29	MTA	IMPLANTABLE COLLAMER LENS (ICL)	Inadequacy of Device Shape and/or Size	Intraocular Pressure Increased	P030016	NA	1	Event Description: THE REPORTER INDICATED THAT A 13.2MM, VICMO13.2, -15.50 DIOPTER IMPLANTABLE COLLAMER LENS WAS IMPLANTED INTO THE PATIENTS RIGHT EYE (OD) ON (B)(6) 2022. ON (B)(6) 2022 THE LENS WAS EXCHANGED FOR A SHORTER LENGTH LENS DUE TO EXCESSIVE VAULT AND ELEVATED INTRAOCULAR PRESSURE. THIS EXCHANGE RESOLVED THE PROBLEM. FOR STATUS OF THE EYE (SIGNS/SYMPTOMS) THE REPORTER STATED "BORDERLIN…	Lens Exchange	Resolved
https://www.accessdata.fda.gov/scripts/cdrh/cfdocs/cfMAUDE/Detail.CFM?MDRFOI__ID=15503201&pc=MTA	2023826-2022-03373	2022-08-18	Injury	STAAR SURGICAL COMPANY	2022-09-29	MTA	IMPLANTABLE COLLAMER LENS (ICL)	Inadequacy of Device Shape and/or Size	Intraocular Pressure Increased	P030016	NA	1	Event Description: THE REPORTER INDICATED THAT A 13.2MM, VICMO13.2, -16.00 DIOPTER IMPLANTABLE COLLAMER LENS WAS IMPLANTED INTO THE PATIENTS LEFT EYE (OS) ON (B)(6) 2022. ON (B)(6) 2022 THE LENS WAS EXCHANGED FOR A SHORTER LENGTH LENS DUE TO EXCESSIVE VAULT AND ELEVATED INTRAOCULAR PRESSURE. THIS EXCHANGE RESOLVED THE PROBLEM. FOR STATUS OF THE EYE (SIGNS/SYMPTOMS) THE REPORTER STATED "BORDERLINE…	Lens Exchange	Resolved
https://www.accessdata.fda.gov/scripts/cdrh/cfdocs/cfMAUDE/Detail.CFM?MDRFOI__ID=16455859&pc=MTA	2023826-2023-00761	2022-12-09	Injury	STAAR SURGICAL COMPANY	2023-02-28	MTA	IMPLANTABLE COLLAMER LENS (ICL)	Inadequacy of Device Shape and/or Size	Intraocular Pressure Increased	P030016	NA	1	Event Description: THE REPORTER INDICATED THAT THE SURGEON IMPLANTED A 13.2MM VICMO13.2; -14.50 DIOPTER IMPLANTABLE COLLAMER LENS INTO THE PATIENT'S LEFT EYE (OS) ON (B)(6) 2022. THE PATIENT EXPERIENCED EXCESSIVE VAULTING AND ELEVATED INTRAOCULAR PRESSURE 28 MMHG; WITHOUT PUPIL BLOCK. LENS REMAINS IMPLANTED. THE CAUSE OF THE EVENT WAS REPORTED AS UNKNOWN. Manufacturer Narrative: ADDITIONAL DATA: …	Lens Exchange	Resolved
https://www.accessdata.fda.gov/scripts/cdrh/cfdocs/cfMAUDE/Detail.CFM?MDRFOI__ID=16554736&pc=MTA	2023826-2023-00869	2022-12-09	Injury	STAAR SURGICAL COMPANY	2023-03-16	MTA	IMPLANTABLE COLLAMER LENS (ICL)	Inadequacy of Device Shape and/or Size	Intraocular Pressure Increased	P030016	NA	1	Event Description: THE REPORTER INDICATED THE SURGEON IMPLANTED A 13.2MM VICM5_13.2 IMPLANTABLE COLLAMER LENS, -09.50 DIOPTER, INTO THE PATIENTS RIGHT EYE (OD) ON (B)(6) 2022. THE LENS WAS REPORTED AS EXCESSIVE VAULTING AND ELEVATED INTRAOCULAR PRESSURE (IOP). THE LENS REMAINED IMPLANTED. THE CAUSE OF THE EVENT WAS UNKNOWN. ADDITIONAL INFORMATION HAS BEEN REQUESTED BUT NONE HAS BEEN FORTHCOMING. …	Lens Exchange	Resolved
https://www.accessdata.fda.gov/scripts/cdrh/cfdocs/cfMAUDE/Detail.CFM?MDRFOI__ID=16433266&pc=MTA	2023826-2023-00524	2022-12-26	Injury	STAAR SURGICAL COMPANY	2023-02-23	MTA	IMPLANTABLE COLLAMER LENS (ICL)	Inadequacy of Device Shape and/or Size	Intraocular Pressure Increased	P030016	NA	1	Event Description: THE REPORTER INDICATED THAT A 12.6MM VICMO12.6 IMPLANTABLE COLLAMER LENS OF -15.0 DIOPTER WAS IMPLANTED INTO THE PATIENT'S RIGHT EYE (OD) ON (B)(6) 2022. IN A SUBSEQUENT SURGERY LATER THAT DAY, THE LENS WAS REMOVED DUE TO EXCESSIVE VAULT AND ELEVATED IOP. Manufacturer Narrative: WORK ORDER SEARCH FOUND NO SIMILAR COMPLAINTS. CLAIM#: (B)(4). Manufacturer Narrative: DEVICE EVALUA…	Lens Extraction	Unknown
https://www.accessdata.fda.gov/scripts/cdrh/cfdocs/cfMAUDE/Detail.CFM?MDRFOI__ID=17741438&pc=MTA	2023826-2023-03980	2023-07-07	Injury	STAAR SURGICAL COMPANY	2023-09-13	MTA	IMPLANTABLE COLLAMER LENS (ICL)	Inadequacy of Device Shape and/or Size	Intraocular Pressure Increased	P030016	NA	1	Event Description: THE REPORTER INDICATED THE SURGEON IMPLANTED A 12.6MM VICM5_12.6 IMPLANTABLE COLLAMER LENS, -01.25 DIOPTER, IN THE PATIENTS RIGHT EYE (OD), ON (B)(6) 2023. THE LENS WAS REMOVED ON (B)(6) 2023 DUE TO EXCESSIVE VAULTING AND ELEVATED INTRAOCULAR PRESSURE (IOP). THE PROBLEM WAS RESOLVED. Manufacturer Narrative: A4: UNK. A5: UNK. A6: UNK. H6 WORK ORDER SEARCH: NO SIMILAR COMPLAINT W…	Lens Extraction	Resolved
https://www.accessdata.fda.gov/scripts/cdrh/cfdocs/cfMAUDE/Detail.CFM?MDRFOI__ID=17754907&pc=MTA	2023826-2023-03981	2023-07-07	Injury	STAAR SURGICAL COMPANY	2023-09-15	MTA	IMPLANTABLE COLLAMER LENS (ICL)	Inadequacy of Device Shape and/or Size	Intraocular Pressure Increased	P030016	NA	1	Event Description: THE REPORTER INDICATED THE SURGEON IMPLANTED A 12.6MM VICM5_12.6 IMPLANTABLE COLLAMER LENS, -01.00 DIOPTER, IN THE PATIENTS LEFT EYE (OS), ON (B)(6) 2023. THE LENS WAS REMOVED ON (B)(6) 2023 DUE TO EXCESSIVE VAULTING AND ELEVATED INTRAOCULAR PRESSURE (IOP). THE PROBLEM WAS RESOLVED. Manufacturer Narrative: H3: DEVICE EVALUATION - LENS WAS RETURNED IN MICROCENTRIFUGE VIAL DRY. V…	Lens Extraction	Resolved
https://www.accessdata.fda.gov/scripts/cdrh/cfdocs/cfMAUDE/Detail.CFM?MDRFOI__ID=17831137&pc=MTA	2023826-2023-04215	2023-07-23	Injury	STAAR SURGICAL COMPANY	2023-09-28	MTA	IMPLANTABLE COLLAMER LENS (ICL)	Inadequacy of Device Shape and/or Size	Intraocular Pressure Increased	P030016	NA	1	Event Description: THE REPORTER INDICATED THE SURGEON IMPLANTED A 13.2MM VICMO13.2 IMPLANTABLE COLLAMER LENS, -04.00 DIOPTER, IN THE PATIENTS RIGHT EYE (OD), ON (B)(6) 2023. THE LENS WAS REMOVED ON (B)(6) 2023 DUE TO EXCESSIVE VAULTING AND HIGH IOP. THE LENS WAS REPLACED WITH A SHORTER LENS AND THE PROBLEM WAS RESOLVED. THE CAUSE OF THE EVENT WAS DUE TO THE DOCTOR CHOSE A DIFFERENT ICL BY ERROR F…	Lens Exchange	Resolved
https://www.accessdata.fda.gov/scripts/cdrh/cfdocs/cfMAUDE/Detail.CFM?MDRFOI__ID=18360955&pc=MTA	2023826-2023-05558	2023-11-23	Injury	STAAR SURGICAL COMPANY	2023-12-19	MTA	IMPLANTABLE COLLAMER LENS (ICL)	Inadequacy of Device Shape and/or Size	Intraocular Pressure Increased	P030016	NA	1	Event Description: THE REPORTER INDICATED THE SURGEON IMPLANTED A 13.7MM VICM5_13.7 IMPLANTABLE COLLAMER LENS, -07.00 DIOPTER, IN THE PATIENTS LEFT EYE (OS), ON (B)(6) 2023. THE LENS WAS REPORTED AS EXCESSIVE VAULTING AND PATIENT EXPERIENCED ELEVATED INTRAOCULAR PRESSURE (IOP). THE LENS REMAINED IMPLANTED. ADDITIONAL INFORMATION HAS BEEN REQUESTED BUT NONE HAS BEEN FORTHCOMING. Manufacturer Narra…	Lens Exchange	Resolved
https://www.accessdata.fda.gov/scripts/cdrh/cfdocs/cfMAUDE/Detail.CFM?MDRFOI__ID=8611940&pc=MTA	2023826-2019-00825	NA	Injury	STAAR SURGICAL COMPANY	2019-05-15	MTA	IMPLANTABLE COLLAMER LENS (ICL)	Inadequacy of Device Shape and/or Size	Intraocular Pressure Increased	P030016	NA	1	Event Description: THE REPORTER INDICATED THAT A 13.7MM, MICL 13.7, -10.5 DIOPTER, IMPLANTABLE COLLAMER LENS WAS IMPLANTED INTO THE PATIENT'S LEFT EYE (OS) ON (B)(6) 2018. HIGH PRESSURE AND EXCESSIVE VAULT WAS OBSERVED, THE LENS WAS REMOVED ON (B)(6) 2018. ADDITIONAL INFORMATION HAS BEEN REQUESTED BUT NONE HAS BEEN FORTHCOMING. IF ADDITIONAL INFORMATION IS RECEIVED A SUPPLEMENTAL MEDWATCH REPORT …	Unknown	Unknown
https://www.accessdata.fda.gov/scripts/cdrh/cfdocs/cfMAUDE/Detail.CFM?MDRFOI__ID=12281694&pc=MTA	2023826-2021-03061	NA	Injury	STAAR SURGICAL COMPANY	2021-08-05	MTA	IMPLANTABLE COLLAMER LENS (ICL)	Inadequacy of Device Shape and/or Size	Intraocular Pressure Increased	P030016	NA	1	Event Description: THE REPORTER INDICATED THAT THE SURGEON IMPLANTED A 13.2MM MICL 13.2, -6.5 DIOPTER, IMPLANTABLE COLLAMER LENS INTO THE PATIENT'S LEFT EYE (OS) ON (B)(6) 2021. THE LENS WAS REPLACED WITH A SHORTER LENGTH LENS DUE TO ELEVATED IOP AND EXCESSIVE VAULT ON (B)(6) 2021. REPORTEDLY, PATIENT HAS DONE BETTER WITH EXCHANGE AND HAS BETTER IOP. ADDITIONAL INFORMATION HAS BEEN REQUESTED BUT …	Lens Exchange	Resolved
https://www.accessdata.fda.gov/scripts/cdrh/cfdocs/cfMAUDE/Detail.CFM?MDRFOI__ID=12281698&pc=MTA	2023826-2021-03060	NA	Injury	STAAR SURGICAL COMPANY	2021-08-05	MTA	IMPLANTABLE COLLAMER LENS (ICL)	Inadequacy of Device Shape and/or Size	Intraocular Pressure Increased	P030016	NA	1	Event Description: THE REPORTER INDICATED THAT THE SURGEON IMPLANTED A 13.2MM MICL 13.2, -7.0 DIOPTER, IMPLANTABLE COLLAMER LENS INTO THE PATIENT'S RIGHT EYE (OD) ON (B)(6) 2021. THE LENS WAS REPLACED WITH A SHORTER LENGTH LENS DUE TO ELEVATED IOP AND EXCESSIVE VAULT ON (B)(6) 2021. REPORTEDLY, PATIENT HAS DONE BETTER WITH EXCHANGE AND HAS BETTER IOP. ADDITIONAL INFORMATION HAS BEEN REQUESTED BUT…	Lens Exchange	Resolved
https://www.accessdata.fda.gov/scripts/cdrh/cfdocs/cfMAUDE/Detail.CFM?MDRFOI__ID=16694223&pc=MTA	2023826-2023-01293	NA	Injury	STAAR SURGICAL COMPANY	2023-04-06 04:00:00	MTA	IMPLANTABLE COLLAMER LENS (ICL)	Inadequacy of Device Shape and/or Size	Intraocular Pressure Increased	P030016	NA	1	Event Description: THE REPORTER INDICATED THAT THE SURGEON IMPLANTED A 13.2MM VICM5_13.2; -9.0 DIOPTER IMPLANTABLE COLLAMER LENS INTO THE PATIENT'S LEFT EYE (OS) ON (B)(6) 2023 . THE SURGEON REPORTS THERE WAS EXCESSIVE VAULTING AND ELEVATED INTRAOCULAR PRESSURE; AND MEDICATION WAS USED. ON (B)(6) 2023 THE LENS WAS EXCHANGED WITH A SHORTER LENGTH LENS AND THIS RESOLVED THE PROBLEM. THE CAUSE OF TH…	Lens Exchange	Resolved
https://www.accessdata.fda.gov/scripts/cdrh/cfdocs/cfMAUDE/Detail.CFM?MDRFOI__ID=5241755&pc=MTA	2023826-2015-01526	2015-10-14	Injury	STAAR SURGICAL COMPANY	2015-11-21	MTA	ICL (IMPLANTABLE COLLAMER LENS)	Inadequacy of Device Shape and/or Size; Appropriate Term/Code Not Available	Intraocular Pressure Increased	NA	NA	1	Event Description: THE REPORTER INDICATED THE SURGEON IMPLANTED A 13.2MM VICMO13.2, -12.50 DIOPTER IMPLANTABLE COLLAMER LENS IN THE PATIENT'S LEFT EYE (OS) ON (B)(6) 2015. EXCESSIVE VAULT AND ELEVATED INTRAOCULAR PRESSURE WAS NOTED ON (B)(6) 2015. LENS REMAINS IMPLANTED._x000D_ Manufacturer Narrative: THE SURGEON DID A REPOSITIONING OF THE NASAL HAPTIC WHICH WAS NOT RIGHTLY LOCATED IN THE SULCUS.…	Lens Exchange + Secondary Operation	Resolved
https://www.accessdata.fda.gov/scripts/cdrh/cfdocs/cfMAUDE/Detail.CFM?MDRFOI__ID=13641098&pc=MTA	2023826-2022-00644	2022-01-27	Malfunction	STAAR SURGICAL COMPANY	2022-03-01	MTA	IMPLANTABLE COLLAMER LENS (ICL)	Misfocusing	Intraocular Pressure Increased	NA	NA	1	Event Description: THE REPORTER INDICATED THE SURGEON IMPLANTED A 13.7MM VICM5_13.7 IMPLANTABLE COLLAMER LENS, -07.50 DIOPTER, IN THE PATIENTS RIGHT EYE (OD), ON (B)(6) 2022. AT 4 HOUR POST-OP, THE INTRAOCULAR PRESSURE WAS 36MMHG BUT THE PRESSURE CAME DOWN TO 14MMHG. THE PATIENT EXPERIENCED A REFRACTIVE SURPRISE AND THE LENS REMAINED IMPLANTED. AT A POST-OP VISIT THE PATIENTS REFRACTION HAD IMPRO…	Lens Retention	Resolved
https://www.accessdata.fda.gov/scripts/cdrh/cfdocs/cfMAUDE/Detail.CFM?MDRFOI__ID=15117846&pc=MTA	2023826-2022-02425	2022-06-30	Injury	STAAR SURGICAL COMPANY	2022-07-27	MTA	IMPLANTABLE COLLAMER LENS (ICL)	Misfocusing	Intraocular Pressure Increased	P030016	NA	1	Event Description: THE REPORTER INDICATED THE SURGEON IMPLANTED A 13.7MM VICM5_13.7 IMPLANTABLE COLLAMER LENS, -03.50 DIOPTER, INTO THE PATIENTS RIGHT EYE (OD) ON (B)(6) 2022. THE PATIENT EXPERIENCED A REFRACTIVE SURPRISE AND THERE WAS ELEVATED INTRAOCULAR PRESSURE (IOP). THE IOP WAS RAISED ON DAY OF SURGERY. DIAMOX WAS USED TO BRING IOP DOWN BUT IOP WAS UP TO 50MMHG ON (B)(6) 2022, SO PATIENT WA…	Lens Retention + Secondary Operation	Resolved
https://www.accessdata.fda.gov/scripts/cdrh/cfdocs/cfMAUDE/Detail.CFM?MDRFOI__ID=10823655&pc=MTA	2023826-2020-02586	2020-10-17	Injury	STAAR SURGICAL COMPANY	2020-11-11	MTA	IMPLANTABLE COLLAMER LENS (ICL)	No Apparent Adverse Event	Intraocular Pressure Increased	N/A	NA	1	Event Description: THE REPORTER INDICATED THAT THE SURGEON IMPLANTED A 12.6MM VICM5 12.6, -08.50 DIOPTER, IMPLANTABLE COLLAMER LENS, INTO THE PATIENT'S LEFT EYE (OS) ON (B)(6) 2020. SIGNIFICANT REDUCTION OF IRIDO-CORNEAL ANGELS WAS OBSERVED AND ELEVATED IOP (37MMHG) WITHOUT PUPIL BLOCK AND ANGLE CLOSURE WAS ASSESSED ON (B)(6) 2020. USE OF STEROIDS AND IOP LOWERING MEDICATIONS PRESCRIBED. POST-OP …	Lens Retention	Resolved
https://www.accessdata.fda.gov/scripts/cdrh/cfdocs/cfMAUDE/Detail.CFM?MDRFOI__ID=10823662&pc=MTA	2023826-2020-02585	2020-10-17	Injury	STAAR SURGICAL COMPANY	2020-11-11	MTA	IMPLANTABLE COLLAMER LENS (ICL)	No Apparent Adverse Event	Intraocular Pressure Increased	N/A	NA	1	Event Description: THE REPORTER INDICATED THAT THE SURGEON IMPLANTED A 12.6MM VICM5 12.6, -10.00 DIOPTER, IMPLANTABLE COLLAMER LENS, INTO THE PATIENT'S RIGHT EYE (OD) ON (B)(6) 2020. SIGNIFICANT REDUCTION OF IRIDO-CORNEAL ANGELS WAS OBSERVED AND ELEVATED IOP (37MMHG) WITHOUT PUPIL BLOCK AND ANGLE CLOSURE WAS ASSESSED ON (B)(6) 2020 AND USE OF IOP LOWERING MEDICATIONS PRESCRIBED. POST-OP MEDICATIO…	Lens Retention	Resolved
https://www.accessdata.fda.gov/scripts/cdrh/cfdocs/cfMAUDE/Detail.CFM?MDRFOI__ID=16773859&pc=MTA	2023826-2023-01423	2022-02-23	Injury	STAAR SURGICAL COMPANY	2023-04-19	MTA	IMPLANTABLE COLLAMER LENS (ICL)	No Apparent Adverse Event	Intraocular Pressure Increased	P030016	NA	1	Event Description: THE REPORTER INDICATED THAT A 12.1MM VICM512.1 IMPLANTABLE COLLAMER LENS OF -9.0 DIOPTER WAS IMPLANTED INTO THE PATIENT'S RIGHT EYE (OD) ON (B)(6) 2022. ON (B)(6) 2023, ELEVATED IOP WAS OBSERVED. CAUSE OF THE EVENT IS UNKNOWN. REPORTEDLY, "BETTER CONTROL OF OCULAR INFLMMATION AND IOP," AND PATIENT CURRENT MEDICATION: AZARGA, ALPHAGEN, PRED FORTE, VIGAMOX. PATIENT DIAGNOSED ON B…	Lens Extraction	Unknown
https://www.accessdata.fda.gov/scripts/cdrh/cfdocs/cfMAUDE/Detail.CFM?MDRFOI__ID=16773860&pc=MTA	2023826-2023-01424	2022-02-23	Injury	STAAR SURGICAL COMPANY	2023-04-19	MTA	IMPLANTABLE COLLAMER LENS (ICL)	No Apparent Adverse Event	Intraocular Pressure Increased	P030016	NA	1	Event Description: THE REPORTER INDICATED THAT A 12.1MM VICM512.1 IMPLANTABLE COLLAMER LENS OF -9.5 DIOPTER WAS IMPLANTED INTO THE PATIENT'S LEFT EYE (OS) ON (B)(6)2022. PIGMENT DISPERSION WAS OBSERVED. CAUSE OF THE EVENT IS UNKNOWN. REPORTEDLY, "BETTER CONTROL OF OCULAR INFLMMATION AND IOP," AND PATIENT'S CURRENT MEDICATION: AZARGA, ALPHAGEN, PRED FORTE, VIGAMOX. PATIENT DIAGNOSED ON BE MYOPIC C…	Lens Extraction	Unknown
https://www.accessdata.fda.gov/scripts/cdrh/cfdocs/cfMAUDE/Detail.CFM?MDRFOI__ID=14178946&pc=MTA	2023826-2022-01224	2022-03-19	Injury	STAAR SURGICAL COMPANY	2022-04-21	MTA	IMPLANTABLE COLLAMER LENS (ICL)	No Apparent Adverse Event	Intraocular Pressure Increased	P030016	NA	1	Event Description: THE REPORTER INDICATED THAT A 13.2MM VICM5 13.2 IMPLANTABLE COLLAMER LENS OF -11.00 DIOPTER WAS IMPLANTED INTO THE PATIENTS RIGHT EYE (OD) ON (B)(6) 2021. ELEVATED IOP WAS OBSERVED. POST-OP OBSERVATION AT 1DAY IOP 19; 1WEEK IOP 27; 1 MONTH IOP 46 AND THE DOCTOR GAVE A STEROID EYE DROP; 3 MONTH IOP 33. CAUSE IS REPORTED AS UNKNOWN. Manufacturer Narrative: WEIGHT-RACE: UNK. PMA/5…	Lens Exchange	Resolved
https://www.accessdata.fda.gov/scripts/cdrh/cfdocs/cfMAUDE/Detail.CFM?MDRFOI__ID=12361974&pc=MTA	2023826-2021-03282	NA	Malfunction	STAAR SURGICAL COMPANY	2021-08-24	MTA	IMPLANTABLE COLLAMER LENS (ICL)	No Apparent Adverse Event	Intraocular Pressure Increased	P030016	NA	1	Event Description: THE REPORTER INDICATED THAT THE SURGEON IMPLANTED A 13.7MM MICL13.7 IMPLANTABLE COLLAMER LENS, -8.5 DIOPTER INTO THE PATIENT'S EYE. THE SURGEON REPORTS HIGH PRESSURE. ATTEMPTS TO OBTAIN ADDITIONAL INFORMATION HAVE NOT BEEN SUCCESSFUL. Manufacturer Narrative: (B)(4). LENS WORK ORDER SEARCH-NO SIMILAR COMPLAINT TYPE EVENTS REPORTED FOR UNITS WITHIN THE SAME LOT. (B)(4).	Unknown	Unknown
https://www.accessdata.fda.gov/scripts/cdrh/cfdocs/cfMAUDE/Detail.CFM?MDRFOI__ID=15502149&pc=MTA	2023826-2022-03357	2022-08-04	Injury	STAAR SURGICAL COMPANY	2022-09-29	MTA	IMPLANTABLE COLLAMER LENS (ICL)	Off-Label Use; Adverse Event Without Identified Device or Use Problem	Intraocular Pressure Increased	P030016	NA	1	Event Description: THE REPORTER INDICATED THAT A 12.6MM VICMO12.6 IMPLANTABLE COLLAMER LENS OF -11.5 DIOPTER, WAS IMPLANTED INTO THE PATIENT'S LEFT EYE (OS) ON (B)(6) 2022. ON (B)(6) 2022, THE LENS WAS EXPLANTED DUE TO ELEVATED IOP. THE PROBLEM WAS RESOLVED. CAUSE IS REPORTED AS UNKNOWN. Manufacturer Narrative: WEIGHT, ETHNICITY, RACE: UNK. CLAIM# (B)(4).	Lens Extraction	Resolved
https://www.accessdata.fda.gov/scripts/cdrh/cfdocs/cfMAUDE/Detail.CFM?MDRFOI__ID=18145297&pc=MTA	2023826-2023-05047	2023-09-09	Injury	STAAR SURGICAL COMPANY	2023-11-15	MTA	IMPLANTABLE COLLAMER LENS (ICL)	Off-Label Use; Adverse Event Without Identified Device or Use Problem	Intraocular Pressure Increased	P030016	NA	1	Event Description: THE REPORTER INDICATED THE SURGEON IMPLANTED A 13.2MM VICMO13.2 IMPLANTABLE COLLAMER LENS, -10.00 DIOPTER, IN THE PATIENTS RIGHT EYE (OD), ON (B)(6) 2023. THE LENS WAS EXPLANTED ON (B)(6) 2023 DUE TO PATIENT EXPERIENCED ELEVATED INTRAOCULAR PRESSURE (IOP) AND THE PROBLEM WAS RESOLVED. THE CAUSE OF THE EVENT WAS UNKNOWN. Manufacturer Narrative: A4: UNK. A5: UNK. A6: UNK. H6 - DE…	Lens Extraction	Resolved
https://www.accessdata.fda.gov/scripts/cdrh/cfdocs/cfMAUDE/Detail.CFM?MDRFOI__ID=18152256&pc=MTA	2023826-2023-05048	2023-09-09	Injury	STAAR SURGICAL COMPANY	2023-11-16	MTA	IMPLANTABLE COLLAMER LENS (ICL)	Off-Label Use; Adverse Event Without Identified Device or Use Problem	Intraocular Pressure Increased	P030016	NA	1	Event Description: THE REPORTER INDICATED THE SURGEON IMPLANTED A 13.2MM VICMO13.2 IMPLANTABLE COLLAMER LENS, -11.00 DIOPTER, IN THE PATIENTS LEFT EYE (OS), ON 02-SEP-2023. THE LENS WAS EXPLANTED ON (B)(6) 2023 DUE TO PATIENT EXPERIENCED ELEVATED INTRAOCULAR PRESSURE (IOP) AND THE PROBLEM WAS RESOLVED. THE CAUSE OF THE EVENT WAS UNKNOWN. Manufacturer Narrative: A4: UNK. A5: UNK. A6: UNK. H6 - DEV…	Lens Extraction	Resolved
https://www.accessdata.fda.gov/scripts/cdrh/cfdocs/cfMAUDE/Detail.CFM?MDRFOI__ID=8699719&pc=MTA	2023826-2019-01050	2019-05-15	Injury	STAAR SURGICAL COMPANY	2019-06-14	MTA	IMPLANTABLE COLLAMER LENS (ICL)	Off-Label Use; Inadequacy of Device Shape and/or Size	Intraocular Pressure Increased	P030016	NA	1	Event Description: THE REPORTER INDICATED THAT A 13.2MM, MICL13.2, -10.5 DIOPTER, IMPLANTABLE COLLAMER LENS WAS IMPLANTED INTO THE PATIENT'S RIGHT EYE (OD) ON (B)(6) 2019. SIGNIFICANT REDUCTION OF IRIDO-CORNEAL ANGLES AND ELEVATED IOP (21MMHG) WITHOUT PUPIL BLOCK AND ANGLE CLOSURE, EXCESSIVE VAULT WAS OBSERVED. PHACO-EMULSIFICATION (CATARACT SURGERY) AND IOL IMPLANTATION WAS DONE, THE LENS WAS RE…	Lens Exchange + Secondary Operation	Unknown
https://www.accessdata.fda.gov/scripts/cdrh/cfdocs/cfMAUDE/Detail.CFM?MDRFOI__ID=9186556&pc=MTA	2023826-2019-01905	2019-09-11	Malfunction	STAAR SURGICAL COMPANY	2019-10-14	MTA	IMPLANTABLE COLLAMER LENS (ICL)	Off-Label Use; Inadequacy of Device Shape and/or Size	Intraocular Pressure Increased	P030016	NA	1	Event Description: THE REPORTER INDICATED THAT THE SURGEON IMPLANTED A 13.2 MM MICL13.2 IMPLANTABLE COLLAMER LENS, -13.0 DIOPTER, INTO THE PATIENT'S LEFT (OS) EYE ON (B)(6) 2019. THE SURGEON REPORTS VAULTING AT 300%, ELEVATED IOP, AND HIGH RISK OF ANGLE CLOSURE. LENS REMAINS IMPLANTED. NO ADDITIONAL INFORMATION HAS BEEN RECEIVED. Manufacturer Narrative: TYPE OF REPORTABLE EVENT: MALFUNCTION. CLAI…	Lens Retention	Unknown
https://www.accessdata.fda.gov/scripts/cdrh/cfdocs/cfMAUDE/Detail.CFM?MDRFOI__ID=11813620&pc=MTA	2023826-2021-01419	2021-01-27	Injury	STAAR SURGICAL COMPANY	2021-05-12	MTA	IMPLANTABLE COLLAMER LENS (ICL)	Off-Label Use; Inadequacy of Device Shape and/or Size	Intraocular Pressure Increased	NA	NA	1	Event Description: THE REPORTER INDICATED THE SURGEON IMPLANTED A 13.2MM VICMO13.2 IMPLANTABLE COLLAMER LENS, -08.00 DIOPTER, IN THE PATIENTS RIGHT EYE (OD), ON (B)(6) 2021. THE LENS WAS EXPLANTED ON (B)(6) 2021 DUE TO EXCESSIVE VAULTING AND ELEVATED INTRAOCULAR PRESSURE (IOP). THE LENS WAS EXCHANGED FOR A SHORTER LENS AND THE PROBLEM WAS RESOLVED. THE CAUSE OF THE EVENT WAS UNKNOWN. Manufacturer…	Lens Exchange	Resolved
https://www.accessdata.fda.gov/scripts/cdrh/cfdocs/cfMAUDE/Detail.CFM?MDRFOI__ID=11815697&pc=MTA	2023826-2021-01420	2021-01-27	Injury	STAAR SURGICAL COMPANY	2021-05-12	MTA	IMPLANTABLE COLLAMER LENS (ICL)	Off-Label Use; Inadequacy of Device Shape and/or Size	Intraocular Pressure Increased	NA	NA	1	Event Description: THE REPORTER INDICATED THE SURGEON IMPLANTED A 13.2MM VICMO13.2 IMPLANTABLE COLLAMER LENS, -07.50 DIOPTER, IN THE PATIENTS LEFT EYE (OS), ON (B)(6) 2021. THE LENS WAS EXPLANTED ON (B)(6) 2021 DUE TO EXCESSIVE VAULTING AND ELEVATED INTRAOCULAR PRESSURE (IOP). THE LENS WAS EXCHANGED FOR A SHORTER LENS AND THE PROBLEM WAS RESOLVED. THE CAUSE OF THE EVENT WAS UNKNOWN. Manufacturer …	Lens Exchange	Resolved
https://www.accessdata.fda.gov/scripts/cdrh/cfdocs/cfMAUDE/Detail.CFM?MDRFOI__ID=13252941&pc=MTA	2023826-2022-00114	2021-09-28	Injury	STAAR SURGICAL COMPANY	2022-01-13	MTA	IMPLANTABLE COLLAMER LENS (ICL)	Off-Label Use; Inadequacy of Device Shape and/or Size	Intraocular Pressure Increased	NA	NA	1	Event Description: THE REPORTER INDICATED THAT A 12.6 VICMO 12.6 IMPLANTABLE COLLAMER LENS OF -10.0 DIOPTER WAS IMPLANTED INTO THE PATIENTS RIGHT EYE (OD) ON (B)(6) 2021. ON (B)(6) 2021 THE LENS WAS EXCHANGED FOR A LONGER LENGTH LENS DUE TO LOW VAULT. THE EXCHANGE RESOLVED THE PROBLEM. CAUSE REPORTED AS UNKNOWN. Manufacturer Narrative: THIS PRODUCT IS NOT MARKETED IN THE US. (B)(4).	Lens Exchange	Resolved
https://www.accessdata.fda.gov/scripts/cdrh/cfdocs/cfMAUDE/Detail.CFM?MDRFOI__ID=13065390&pc=MTA	2023826-2021-04742	2021-10-17	Injury	STAAR SURGICAL COMPANY	2021-12-22	MTA	IMPLANTABLE COLLAMER LENS (ICL)	Off-Label Use; Inadequacy of Device Shape and/or Size	Intraocular Pressure Increased	NA	NA	1	Event Description: THE REPORTER INDICATED THAT A 12.6MM VICM5 12.6 IMPLANTABLE COLLAMER LENS OF -14.0 DIOPTER WAS IMPLANTED INTO THE PATIENTS RIGHT EYE (OD) ON (B)(6) 2021. ON (B)(6) 2021, THE LENS WAS EXCHANGED FOR A SHORTER LENGTH LENS DUE TO EXCESSIVE VAULT. THE PROBLEM WAS RESOLVED. CAUSE WAS REPORTED AS UNKNOWN. Manufacturer Narrative: PATIENT WEIGHT, ETHNICITY AND RACE: UNK. THIS PRODUCT IS…	Lens Exchange	Resolved
https://www.accessdata.fda.gov/scripts/cdrh/cfdocs/cfMAUDE/Detail.CFM?MDRFOI__ID=13253002&pc=MTA	2023826-2022-00115	2021-10-22	Injury	STAAR SURGICAL COMPANY	2022-01-13	MTA	IMPLANTABLE COLLAMER LENS (ICL)	Off-Label Use; Inadequacy of Device Shape and/or Size	Intraocular Pressure Increased	NA	NA	1	Event Description: THE REPORTER INDICATED THAT A 12.6 VICMO 12.6 IMPLANTABLE COLLAMER LENS OF -10.0 DIOPTER WAS IMPLANTED INTO THE PATIENTS LEFT EYE (OS) ON (B)(6) 2021. ON (B)(6) 2021 THE LENS WAS EXCHANGED FOR A LONGER LENGTH LENS DUE TO LOW VAULT. THE EXCHANGE RESOLVED THE PROBLEM. CAUSE REPORTED AS UNKNOWN. Manufacturer Narrative: THIS PRODUCT IS NOT MARKETED IN THE US. (B)(4).	Lens Exchange	Resolved
https://www.accessdata.fda.gov/scripts/cdrh/cfdocs/cfMAUDE/Detail.CFM?MDRFOI__ID=13253038&pc=MTA	2023826-2022-00116	2021-10-22	Injury	STAAR SURGICAL COMPANY	2022-01-13	MTA	IMPLANTABLE COLLAMER LENS (ICL)	Off-Label Use; Inadequacy of Device Shape and/or Size	Intraocular Pressure Increased	NA	NA	1	Event Description: THE REPORTER INDICATED THAT A 12.6 VICMO 12.6 IMPLANTABLE COLLAMER LENS OF -12.5 DIOPTER WAS IMPLANTED INTO THE PATIENTS RIGHT EYE (OD) ON (B)(6) 2021. ON (B)(6) 2021 THE LENS WAS EXCHANGED FOR A LONGER LENGTH LENS DUE TO LOW VAULT. THE EXCHANGE RESOLVED THE PROBLEM. CAUSE REPORTED AS UNKNOWN. Manufacturer Narrative: PMA/510K: THIS PRODUCT IS NOT MARKETED IN THE US. (B)(4).	Lens Exchange	Resolved
https://www.accessdata.fda.gov/scripts/cdrh/cfdocs/cfMAUDE/Detail.CFM?MDRFOI__ID=13184529&pc=MTA	2023826-2022-00103	2021-11-24	Injury	STAAR SURGICAL COMPANY	2022-01-06	MTA	IMPLANTABLE COLLAMER LENS (ICL)	Off-Label Use; Inadequacy of Device Shape and/or Size	Intraocular Pressure Increased	NA	NA	1	Event Description: THE REPORTER INDICATED THAT A 12.6 VICMO 12.6 IMPLANTABLE COLLAMER LENS OF -10.0 DIOPTER WAS IMPLANTED INTO THE PATIENTS LEFT EYE (OS) ON (B)(6) 2021. ON (B)(6) 2021 THE LENS WAS EXCHANGED FOR A SHORTER LENGTH LENS DUE TO EXCESSIVE VAULT. THE EXCHANGE RESOLVED THE PROBLEM. CAUSE REPORTED AS UNKNOWN. Manufacturer Narrative: THIS PRODUCT IS NOT MARKETED IN THE US. (B)(4).	Lens Exchange	Resolved
https://www.accessdata.fda.gov/scripts/cdrh/cfdocs/cfMAUDE/Detail.CFM?MDRFOI__ID=13172928&pc=MTA	2023826-2022-00098	2021-11-26	Injury	STAAR SURGICAL COMPANY	2022-01-05	MTA	IMPLANTABLE COLLAMER LENS (ICL)	Off-Label Use; Inadequacy of Device Shape and/or Size	Intraocular Pressure Increased	NA	NA	1	Event Description: THE REPORTER INDICATED THAT A 13.2MM VICMO 13.2 IMPLANTABLE COLLAMER LENS OF -5.0 DIOPTER WAS IMPLANTED INTO THE PATIENTS LEFT EYE (OS) ON (B)(6) 2021. ON THE SAME DAY SEPARATE SURGERY THE LENS WAS REMOVED DUE TO EXCESSIVE VAULT WITH ELEVATED IOP. A REPLACEMENT LENS WAS LATER IMPLANTED OF SHORTER LENGTH AND THE PROBLEM WAS RESOLVED. CAUSE REPORTED AS UNKNOWN. Manufacturer Narra…	Lens Exchange	Resolved
https://www.accessdata.fda.gov/scripts/cdrh/cfdocs/cfMAUDE/Detail.CFM?MDRFOI__ID=13172930&pc=MTA	2023826-2022-00097	2021-11-26	Injury	STAAR SURGICAL COMPANY	2022-01-05	MTA	IMPLANTABLE COLLAMER LENS (ICL)	Off-Label Use; Inadequacy of Device Shape and/or Size	Intraocular Pressure Increased	NA	NA	1	Event Description: THE REPORTER INDICATED THAT A 13.2MM VICMO 13.2 IMPLANTABLE COLLAMER LENS OF -4.0 DIOPTER WAS IMPLANTED INTO THE PATIENTS RIGHT EYE (OD) ON (B)(6) 2021. ON THE SAME DAY SEPARATE SURGERY THE LENS WAS REMOVED DUE TO EXCESSIVE VAULT WITH ELEVATED IOP. A REPLACEMENT LENS WAS LATER IMPLANTED OF SHORTER LENGTH AND THE PROBLEM WAS RESOLVED. CAUSE REPORTED AS UNKNOWN. Manufacturer Narr…	Lens Exchange	Resolved
https://www.accessdata.fda.gov/scripts/cdrh/cfdocs/cfMAUDE/Detail.CFM?MDRFOI__ID=16728674&pc=MTA	2023826-2023-01333	2022-12-24	Malfunction	STAAR SURGICAL COMPANY	2023-04-12	MTA	IMPLANTABLE COLLAMER LENS (ICL)	Optical Problem	Intraocular Pressure Increased	P030016	NA	1	Event Description: THE REPORTER INDICATED, THAT A 12.6MM, VICMO12.6, IMPLANTABLE COLLAMER LENS OF A -14.0 DIOPTER, WAS IMPLANTED IN THE PATIENT'S RIGHT EYE (OD) ON (B)(6) 2022. THE LENS WAS INTRAOPERATIVELY IMPANTED AND REMOVED. DUE TO ELEVATED IOP WITHOUT PUPIL BLOCK, AND ANGLE CLOSURE, AND SIGNIFICANT REDUCTION OF IRIDO-CORNEAL ANGLES. THE PROBLEM WAS RESOLVED. CAUSE OF THE EVENT IS UNKNOWN. Ma…	Lens Extraction	Resolved
https://www.accessdata.fda.gov/scripts/cdrh/cfdocs/cfMAUDE/Detail.CFM?MDRFOI__ID=17704133&pc=MTA	2023826-2023-03950	1998-11-05	Injury	STAAR SURGICAL COMPANY	2023-09-07	MTA	IMPLANTABLE COLLAMER LENS (ICL)	Adverse Event Without Identified Device or Use Problem	Intraocular Pressure Increased; Appropriate Clinical Signs, Symptoms, Conditions Term / Code Not Available	P030016	NA	1	Event Description: THE REPORTER INDICATED THAT A 12.6MM VICM5_12.6 IMPLANTABLE COLLAMER LENS OF -12.00 DIOPTER WAS IMPLANTED INTO THE PATIENT'S RIGHT EYE (OD) ON (B)(6) 2021. THE PATIENT PRESENTED WITH REDNESS IN THE EYE, PIGMENT DISPERSION AND ELEVATED IOP IN THE EARLY POST-OP PERIOD. IT WAS REPORTED THAT THE PROBLEM RESOLVED WITH MEDICAL MANAGEMENT. THE REPORTER STATES THAT THE DISPERSED PIGMEN…	Lens Retention	Resolved
https://www.accessdata.fda.gov/scripts/cdrh/cfdocs/cfMAUDE/Detail.CFM?MDRFOI__ID=10138789&pc=MTA	2023826-2020-01186	2019-07-11	Injury	STAAR SURGICAL COMPANY	2020-06-10	MTA	IMPLANTABLE COLLAMER LENS (ICL)	Adverse Event Without Identified Device or Use Problem	Intraocular Pressure Increased; Appropriate Clinical Signs, Symptoms, Conditions Term / Code Not Available	N/A	NA	1	Event Description: THE REPORTER INDICATED THAT THE SURGEON IMPLANTED A 13.2MM VICMO13.2, -08.00 DIOPTER, IMPLANTABLE COLLAMER LENS INTO THE PATIENT'S LEFT EYE (OS) ON (B)(6) 2019. PUPIL BLOCK, ANGLE CLOSURE WITH ELEVATED IOP (38MMHG) WAS ASSESSED ON (B)(6) 2019. UNREACTIVE (FIXED) PUPIL, MID-DILATED IRIS WITH PERIPHERAL IRIDO-CORNEAL TOUCH AND FLAT AC WAS OBSERVED. AN ADDITION OF NEW PI AND YAG W…	Lens Retention + Secondary Operation	Resolved
https://www.accessdata.fda.gov/scripts/cdrh/cfdocs/cfMAUDE/Detail.CFM?MDRFOI__ID=10706946&pc=MTA	2023826-2020-02421	2020-09-07	Injury	STAAR SURGICAL COMPANY	2020-10-20	MTA	IMPLANTABLE COLLAMER LENS (ICL)	Adverse Event Without Identified Device or Use Problem	Intraocular Pressure Increased; Appropriate Clinical Signs, Symptoms, Conditions Term / Code Not Available	NA#S-P#NA	NA	1	Event Description: THE REPORTER INDICATED THE SURGEON IMPLANTED A 13.2MM VICM5_13.2 IMPLANTABLE COLLAMER LENS, -07.00 DIOPTER, IN THE PATIENTS LEFT EYE (OS), ON (B)(6) 2020. THE LENS WAS REPORTED AS HAVING ELEVATED INTRAOCULAR PRESSURE (IOP), UNREACTIVE (FIXED) PUPIL, ANISOCORIA AND IRIS ATROPHY. THE LENS WAS REPOSITIONED (ROTATED) BUT THE PROBLEM WAS NOT RESOLVED. MEDICATION WAS PRESCRIBED BUT W…	Lens Repositioning	Not_Resolved
https://www.accessdata.fda.gov/scripts/cdrh/cfdocs/cfMAUDE/Detail.CFM?MDRFOI__ID=11507466&pc=MTA	2023826-2021-00660	2021-02-12	Injury	STAAR SURGICAL COMPANY	2021-03-17	MTA	IMPLANTABLE COLLAMER LENS (ICL)	Adverse Event Without Identified Device or Use Problem	Intraocular Pressure Increased; Appropriate Clinical Signs, Symptoms, Conditions Term / Code Not Available	N/A	NA	1	Event Description: THE REPORTER INDICATED THE SURGEON IMPLANTED A 12.6MM VICM5_12.6 IMPLANTABLE COLLAMER LENS, -3.0 DIOPTER INTO THE PATIENT'S LEFT EYE (OS) ON (B)(6) 2021. ON THE SAME DATE IN A SEPARATE SURGERY THE LENS WAS EXPLANTED DUE TO ELEVATED IOP AND SIGNIFICANT REDUCTION OF IRIDO-CORNEAL ANGLES (ICA) THE PROBLEM WAS RESOLVED. Manufacturer Narrative: PMA/510(K): THIS PRODUCT IS MANUFACTUR…	Lens Extraction	Resolved
https://www.accessdata.fda.gov/scripts/cdrh/cfdocs/cfMAUDE/Detail.CFM?MDRFOI__ID=12277915&pc=MTA	2023826-2021-03074	2021-07-09	Injury	STAAR SURGICAL COMPANY	2021-08-04	MTA	IMPLANTABLE COLLAMER LENS (ICL)	Adverse Event Without Identified Device or Use Problem	Intraocular Pressure Increased; Appropriate Clinical Signs, Symptoms, Conditions Term / Code Not Available	NA	NA	1	Event Description: IT WAS REPORTED THAT ON (B)(6) 2021 A 12.1MM MICL12.1; -11.0 DIOPTER IMPLANTABLE COLLAMER LENS WAS IMPLANTED INTO THE PATIENT'S LEFT EYE (OS) AS A REPLACEMENT LENS. THE SURGEON INDICATED THE PATIENT EXPERIENCED SHALLOW AC, ELEVATED INTRAOCULAR PRESSURE AND WAS TREATED WITH MEDICATIONS LIDOCAINE, MOISTAT AND MIOCHOL ALONG WITH TOPICAL PILOCARPINE. PATIENT'S ANGLES WERE STILL NAR…	Lens Retention	Resolved
https://www.accessdata.fda.gov/scripts/cdrh/cfdocs/cfMAUDE/Detail.CFM?MDRFOI__ID=12278129&pc=MTA	2023826-2021-03075	2021-07-09	Injury	STAAR SURGICAL COMPANY	2021-08-04	MTA	IMPLANTABLE COLLAMER LENS (ICL)	Adverse Event Without Identified Device or Use Problem	Intraocular Pressure Increased; Appropriate Clinical Signs, Symptoms, Conditions Term / Code Not Available	NA	NA	1	Event Description: IT WAS REPORTED THAT ON (B)(6) 2021 A 12.1MM MICL12.1; -11.5 DIOPTER IMPLANTABLE COLLAMER LENS WAS IMPLANTED INTO THE PATIENT'S RIGHT EYE (OD) AS A REPLACEMENT LENS. THE SURGEON INDICATED THE PATIENT EXPERIENCED SHALLOW AC, ELEVATED INTRAOCULAR PRESSURE AND WAS TREATED WITH MEDICATIONS LIDOCAINE, MOISTAT AND MIOCHOL ALONG WITH TOPICAL PILOCARPINE. PATIENT'S ANGLES WERE STILL NA…	Lens Retention	Resolved
https://www.accessdata.fda.gov/scripts/cdrh/cfdocs/cfMAUDE/Detail.CFM?MDRFOI__ID=14215323&pc=MTA	2023826-2022-01346	2022-03-04	Injury	STAAR SURGICAL COMPANY	2022-04-26	MTA	IMPLANTABLE COLLAMER LENS (ICL)	Adverse Event Without Identified Device or Use Problem	Intraocular Pressure Increased; Appropriate Clinical Signs, Symptoms, Conditions Term / Code Not Available	NA	NA	1	Event Description: THE REPORTER INDICATED THAT THE SURGEON IMPLANTED A 12.6MM MICL12.6; -11.5 DIOPTER IMPLANTABLE COLLAMER LENS INTO THE PATIENT'S RIGHT EYE (OD) ON (B)(6) 2022. THE PATIENT EXPERIENCED ANGLE CLOSURE WITH ELEVATED INTRAOCULAR PRESSURE. ON (B)(6) 2022 THE LENS WAS EXCHANGED WITH A SHORTER LENGTH LENS AND THIS RESOLVED THE PROBLEM. THE CAUSE OF THE EVENT WAS REPORTED AS THE DEVICE. …	Lens Exchange	Resolved
https://www.accessdata.fda.gov/scripts/cdrh/cfdocs/cfMAUDE/Detail.CFM?MDRFOI__ID=14215325&pc=MTA	2023826-2022-01347	2022-03-04	Injury	STAAR SURGICAL COMPANY	2022-04-26	MTA	IMPLANTABLE COLLAMER LENS (ICL)	Adverse Event Without Identified Device or Use Problem	Intraocular Pressure Increased; Appropriate Clinical Signs, Symptoms, Conditions Term / Code Not Available	NA	NA	1	Event Description: THE REPORTER INDICATED THAT THE SURGEON IMPLANTED A 12.6MM MICL12.6; -11.0 DIOPTER IMPLANTABLE COLLAMER LENS INTO THE PATIENT'S LEFT EYE (OS) ON (B)(6) 2022. THE PATIENT EXPERIENCED ANGLE CLOSURE WITH ELEVATED INTRAOCULAR PRESSURE. ON (B)(6) 2022 THE LENS WAS EXCHANGED WITH A SHORTER LENGTH LENS AND THE PROBLEM WAS RESOLVED. THE CAUSE OF THE EVENT WAS REPORTED AS THE DEVICE. Ma…	Lens Exchange	Resolved
https://www.accessdata.fda.gov/scripts/cdrh/cfdocs/cfMAUDE/Detail.CFM?MDRFOI__ID=15506324&pc=MTA	2023826-2022-03358	2022-08-05	Injury	STAAR SURGICAL COMPANY	2022-09-29	MTA	IMPLANTABLE COLLAMER LENS (ICL)	Adverse Event Without Identified Device or Use Problem	Intraocular Pressure Increased; Appropriate Clinical Signs, Symptoms, Conditions Term / Code Not Available	P030016	NA	1	Event Description: THE REPORTER INDICATED THAT A 13.2MM VICM513.2 IMPLANTABLE COLLAMER LENS OF -4.0 DIOPTER WAS IMPLANTED INTO THE PATIENT'S RIGHT EYE (OD) ON (B)(6) 2022. ON (B)(6) 2022, THE LENS WAS EXCHANGED FOR A SHORTER LENGTH LENS DUE TO SIGNIFICANT REDUCTION OF IRIDOCORNEAL ANGLES, PUPIL BLOCK WITH ELEVATED IOP, ANGLE CLOSURE WITH ELEVATED IOP, PIGMENT DISPERSION, AND UNREACTIVE (FIXED) PU…	Lens Exchange	Resolved
https://www.accessdata.fda.gov/scripts/cdrh/cfdocs/cfMAUDE/Detail.CFM?MDRFOI__ID=18509050&pc=MTA	2023826-2024-00217	2023-12-20	Injury	STAAR SURGICAL COMPANY	2024-01-12	MTA	IMPLANTABLE COLLAMER LENS (ICL)	Adverse Event Without Identified Device or Use Problem	Intraocular Pressure Increased; Appropriate Clinical Signs, Symptoms, Conditions Term / Code Not Available	P030016	NA	1	Event Description: THE REPORTER INDICATED THAT A 12.1MM VICMO12.1 IMPLANTABLE COLLAMER LENS OF -8.50 DIOPTER WAS IMPLANTED INTO THE PATIENT'S RIGHT EYE (OD) ON (B)(6) 2023. ANGLE CLOSURE WITH ELEVATED IOP WAS OBSERVED DURING POST-OP EXAMINATION. THE REPORTER STATED THAT THE SURGEON ROTATED THE LENS TO VERTICAL POSITION ON (B)(6) 2023 SINCE IT WAS FOUND THE VAULT WAS HIGH DURING RE-EXAMINATION ON …	Lens Retention + Secondary Operation	Resolved
https://www.accessdata.fda.gov/scripts/cdrh/cfdocs/cfMAUDE/Detail.CFM?MDRFOI__ID=15571958&pc=MTA	2023826-2022-03586	NA	Injury	STAAR SURGICAL COMPANY	2022-10-10 04:00:00	MTA	IMPLANTABLE COLLAMER LENS (ICL)	Adverse Event Without Identified Device or Use Problem	Intraocular Pressure Increased; Appropriate Clinical Signs, Symptoms, Conditions Term / Code Not Available	P030016	NA	1	Event Description: THE REPORTER INDICATED THAT A 12.6MM, VICMO12.6, -15.50 DIOPTER IMPLANTABLE COLLAMER LENS WAS IMPLANTED INTO THE PATIENTS RIGHT EYE (OD) ON (B)(6) 2022 AS A REPLACEMENT LENS TO ADDRESS EXCESSIVE VAULT AND ELEVATED INTRAOCULARE PRESSURE. IT WAS REPORTED THAT IT RESOLVED PROBLEM BUT FOR STATUS OF THE EYE (SIGN/SYMPTOMS) THE REPORTER STATED "MILD PIGMENT DISPERSION AND BORDERLINE …	Lens Exchange	Unknown
https://www.accessdata.fda.gov/scripts/cdrh/cfdocs/cfMAUDE/Detail.CFM?MDRFOI__ID=15577782&pc=MTA	2023826-2022-03587	NA	Injury	STAAR SURGICAL COMPANY	2022-10-11 04:00:00	MTA	IMPLANTABLE COLLAMER LENS (ICL)	Adverse Event Without Identified Device or Use Problem	Intraocular Pressure Increased; Appropriate Clinical Signs, Symptoms, Conditions Term / Code Not Available	P030016	NA	1	Event Description: THE REPORTER INDICATED THAT A 12.6MM, VICMO12.6, -16.00 DIOPTER IMPLANTABLE COLLAMER LENS WAS IMPLANTED INTO THE PATIENTS LEFT EYE (OS) ON (B)(6) 2022 AS A REPLACEMENT LENS TO ADDRESS EXCESSIVE VAULT AND ELEVATED INTRAOCULARE PRESSURE. IT WAS REPORTED THAT IT RESOLVED THE PROBLEM BUT FOR STATUS OF THE EYE (SIGN/SYMPTOMS) THE REPORTER STATED "MILD PIGMENT DISPERSION AND BORDERLI…	Lens Exchange	Unknown
https://www.accessdata.fda.gov/scripts/cdrh/cfdocs/cfMAUDE/Detail.CFM?MDRFOI__ID=18561095&pc=MTA	2023826-2024-00367	NA	Injury	STAAR SURGICAL COMPANY	2024-01-23 05:00:00	MTA	IMPLANTABLE COLLAMER LENS (ICL)	Adverse Event Without Identified Device or Use Problem	Intraocular Pressure Increased; Appropriate Clinical Signs, Symptoms, Conditions Term / Code Not Available	P030016	NA	1	Event Description: THE REPORTER INDICATED THAT A 13.2MM, VICM5_13.2, -11.00 DIOPTER, IMPLANTABLE COLLAMER LENS WAS IMPLANTED INTO THE PATIENTS LEFT EYE (OS). THE PATIENT EXPERIENCED NARROW ANTERIOR CHAMBER, ELEVATED IOP WITH PIGMENT DISPERSION. IT WAS REPORTED THAT ON (B)(6) 2023 THE LENS WAS EXCHANGED. ADDITIONAL INFORMATION HAS BEEN REQUESTED BUT NONE HAS BEEN FORTHCOMING. IF ADDITIONAL INFORMA…	Lens Exchange	Unknown
https://www.accessdata.fda.gov/scripts/cdrh/cfdocs/cfMAUDE/Detail.CFM?MDRFOI__ID=15713915&pc=MTA	2023826-2022-03878	2022-08-26	Injury	STAAR SURGICAL COMPANY	2022-11-02	MTA	IMPLANTABLE COLLAMER LENS (ICL)	Device Dislodged or Dislocated; Patient Device Interaction Problem	Intraocular Pressure Increased; Appropriate Clinical Signs, Symptoms, Conditions Term / Code Not Available	P030016	NA	1	Event Description: THE REPORTER INDICATED THE SURGEON IMPLANTED AN ICL IMPLANTABLE COLLAMER LENS, INTO THE PATIENT'S LEFT EYE (OS). THE LENS WAS REPORTED AS HAVING ROTATED AND THE PATIENTS PRESSURE HAD SPIKED. THE LENS REMAINED IMPLANTED. ADDITIONAL INFORMATION HAS BEEN REQUESTED BUT NONE HAS BEEN FORTHCOMING. Manufacturer Narrative: ADDITIONAL DATA: B5: THE REPORTER INDICATED THE SURGEON IMPLANT…	Lens Extraction	Not_Resolved
https://www.accessdata.fda.gov/scripts/cdrh/cfdocs/cfMAUDE/Detail.CFM?MDRFOI__ID=11168648&pc=MTA	2023826-2021-00133	2019-04-04	Injury	STAAR SURGICAL COMPANY	2021-01-14	MTA	IMPLANTABLE COLLAMER LENS (ICL)	Inadequacy of Device Shape and/or Size	Intraocular Pressure Increased; Appropriate Clinical Signs, Symptoms, Conditions Term / Code Not Available	N/A	NA	1	Event Description: THE REPORTER INDICATED THAT A 13.2MM, VICMO13.2, -7.5 DIOPTER, IMPLANTABLE COLLAMER LENS WAS IMPLANTED INTO THE PATIENTS RIGHT EYE (OD) ON (B)(6) 2019. ON (B)(6) 2019 THE LENS WAS EXCHANGED FOR A SHORTER LENGTH LENS DUE TO EXCESSIVE VAULT, ELEVATED IOP AND SIGNIFICANT REDUCTION OF IRIDO-CORNEAL ANGLES. THIS EXCHANGE RESOLVED THE PROBLEM. Manufacturer Narrative: ADDITIONAL INFOR…	Lens Exchange	Resolved
https://www.accessdata.fda.gov/scripts/cdrh/cfdocs/cfMAUDE/Detail.CFM?MDRFOI__ID=10535260&pc=MTA	2023826-2020-01976	2020-08-06	Injury	STAAR SURGICAL COMPANY	2020-09-15	MTA	IMPLANTABLE COLLAMER LENS (ICL)	Inadequacy of Device Shape and/or Size	Intraocular Pressure Increased; Appropriate Clinical Signs, Symptoms, Conditions Term / Code Not Available	P030016	NA	1	Event Description: THE REPORTER INDICATED THE SURGEON IMPLANTED A 13.7MM MICL13.7 IMPLANTABLE COLLAMER LENS, -05.50 DIOPTER, IN THE PATIENTS EYE. THE LENS WAS REPORTED AS EXCESSIVE VAULTING AND ANGLE CLOSURE. THE LENS WILL BE EXPLANTED AND EXCHANGED. ADDITIONAL INFORMATION HAS BEEN REQUESTED BUT NONE HAS BEEN FORTHCOMING. IF ADDITIONAL INFORMATION IS RECEIVED, A SUPPLEMENTAL MEDWATCH WILL BE SUBM…	Lens Exchange	Resolved
https://www.accessdata.fda.gov/scripts/cdrh/cfdocs/cfMAUDE/Detail.CFM?MDRFOI__ID=10963437&pc=MTA	2023826-2020-02978	2020-08-07	Malfunction	STAAR SURGICAL COMPANY	2020-12-07	MTA	IMPLANTABLE COLLAMER LENS (ICL)	Inadequacy of Device Shape and/or Size	Intraocular Pressure Increased; Appropriate Clinical Signs, Symptoms, Conditions Term / Code Not Available	N/A	NA	1	Event Description: THE REPORTER INDICATED THAT A 13.2MM, VICMO13.2, -10.50 DIOPTER, IMPLANTABLE COLLAMER LENS WAS IMPLANTED INTO THE PATIENTS LEFT EYE (OS) ON (B)(6) 2020. THE LENS WAS REMOVED WITHIN THE SAME SURGERY DUE TO EXCESSIVE VAULT, ELEVATED IOP AND SIGNIFICANT REDUCTION OF IRIDO-CORNEAL ANGLES. ON (B)(6) 2020 A REPLACEMENT LENS OF SHORTER LENGTH WAS IMPLANTED AND THE PROBLEM RESOLVED. Ma…	Lens Exchange	Resolved
https://www.accessdata.fda.gov/scripts/cdrh/cfdocs/cfMAUDE/Detail.CFM?MDRFOI__ID=11722535&pc=MTA	2023826-2021-01208	2021-03-10	Injury	STAAR SURGICAL COMPANY	2021-04-26	MTA	IMPLANTABLE COLLAMER LENS (ICL)	Inadequacy of Device Shape and/or Size	Intraocular Pressure Increased; Appropriate Clinical Signs, Symptoms, Conditions Term / Code Not Available	NA	NA	1	Event Description: THE REPORTER INDICATED THAT A 13.2MM, VICM5_13.2, -11.50 DIOPTER, IMPLANTABLE COLLAMER LENS WAS IMPLANTED INTO THE PATIENTS LEFT EYE (OS) ON (B)(6) 2021. ON (B)(6) 2021 THE LENS WAS EXCHANGED FOR A SHORTER LENGTH LENS DUE TO EXCESSIVE VAULT, ELEVATED IOP AND UNREACTIVE PUPIL (PUPIL IS REACTIVE TO LIGHT BUT VERY DILATED). FOR STATUS OF THE EYE (SIGNS/SYMPTOMS): "AWAITING FOLLOW …	Lens Exchange	Unknown
https://www.accessdata.fda.gov/scripts/cdrh/cfdocs/cfMAUDE/Detail.CFM?MDRFOI__ID=11721772&pc=MTA	2023826-2021-01127	2021-03-16	Injury	STAAR SURGICAL COMPANY	2021-04-24	MTA	IMPLANTABLE COLLAMER LENS (ICL)	Inadequacy of Device Shape and/or Size	Intraocular Pressure Increased; Appropriate Clinical Signs, Symptoms, Conditions Term / Code Not Available	P990013	NA	1	Event Description: IT WAS REPORTED THAT A 13.2MM, MICL13.2, -8.5 DIOPTER, IMPLANTABLE COLLAMER LENS WAS IMPLANTED INTO THE PATIENTS RIGHT EYE (OD) ON (B)(6) 2021. ON (B)(6) 2021 THE LENS WAS EXCHANGED FOR A SHORTER LENGTH LENS DUE TO EXCESSIVE VAULT (1.42MM VAULT), MILD DILATED PUPIL AND ELEVATED IOP (REQUIRING DROPS). THIS EXCHANGE RESOLVED THE PROBLEM. DEVICE, PATIENT- RELATED FACTOR, UNKNOWN, …	Lens Exchange	Resolved
https://www.accessdata.fda.gov/scripts/cdrh/cfdocs/cfMAUDE/Detail.CFM?MDRFOI__ID=11925869&pc=MTA	2023826-2021-01746	2021-04-28	Injury	STAAR SURGICAL COMPANY	2021-06-02	MTA	IMPLANTABLE COLLAMER LENS (ICL)	Inadequacy of Device Shape and/or Size	Intraocular Pressure Increased; Appropriate Clinical Signs, Symptoms, Conditions Term / Code Not Available	NA	NA	1	Event Description: THE REPORTER INDICATED THAT A 13.2MM ,VICMO13.2, -17.00 DIOPTER, IMPLANTABLE COLLAMER LENS WAS IMPLANTED INTO THE PATIENTS RIGHT EYE (OD) ON (B)(6) 2021. HIGH VAULT AND ANGLE CLOSURE WITH ELEVATED IOP WAS OBSERVED. IT WAS REPORTED THAT MEDICAL INTERVENTION (ANTIGLAUCOMATEOUS TREATMENT) WAS PERFORMED WHILE WAITING FOR SURGERY. IT WAS RECENTLY REPORTED THAT LENS EXCHANGE WAS PERF…	Lens Exchange	Unknown
https://www.accessdata.fda.gov/scripts/cdrh/cfdocs/cfMAUDE/Detail.CFM?MDRFOI__ID=12308408&pc=MTA	2023826-2021-03089	2021-04-30	Injury	STAAR SURGICAL COMPANY	2021-08-11	MTA	IMPLANTABLE COLLAMER LENS (ICL)	Inadequacy of Device Shape and/or Size	Intraocular Pressure Increased; Appropriate Clinical Signs, Symptoms, Conditions Term / Code Not Available	N/A	NA	1	Event Description: THE REPORTER INDICATED THAT THE SURGEON IMPLANTED A 12.6MM VICMO12.6, -15.00 DIOPTER, IMPLANTABLE COLLAMER LENS INTO THE PATIENT'S RIGHT EYE (OD) ON (B)(6) 2021. THE LENS WAS EXPLANTED DUE TO SIGNIFICANT REDUCTION OF IRIDO-CORNEAL ANGLES, ELEVATED IOP (50MMHG) WITHOUT PUPIL BLOCK AND ANGLE CLOSURE, AND EXCESSIVE VAULT ON (B)(6) 2021. THIS RESOLVED THE PROBLEM. CAUSE OF THE EVEN…	Lens Extraction	Resolved
https://www.accessdata.fda.gov/scripts/cdrh/cfdocs/cfMAUDE/Detail.CFM?MDRFOI__ID=12178435&pc=MTA	2023826-2021-02702	2021-06-11	Injury	STAAR SURGICAL COMPANY	2021-07-15	MTA	IMPLANTABLE COLLAMER LENS	Inadequacy of Device Shape and/or Size	Intraocular Pressure Increased; Appropriate Clinical Signs, Symptoms, Conditions Term / Code Not Available	P030016	NA	1	Event Description: THE REPORTER INDICATED THAT THE SURGEON IMPLANTED A 13.2MM MICL13.2 IMPLANTABLE COLLAMER LENS -16.0 DIOPTER INTO THE PATIENT'S LEFT (OS) EYE ON (B)(6) 2021. ON (B)(6) 2021 THE LENS WAS EXPLANTED DUE TO EXCESSIVE VAULT, ANGLE CLOSURE, AND ELEVATED IOP. THE CAUSE OF THE EVENT IS REPORTED AS DEVICE: "DEVICE BEING TOO LARGE CAUSED ANTERIOR VAULT, RESULTING IN NARROWING ANTERIOR CHA…	Lens Exchange	Resolved
https://www.accessdata.fda.gov/scripts/cdrh/cfdocs/cfMAUDE/Detail.CFM?MDRFOI__ID=12271650&pc=MTA	2023826-2021-03011	2021-07-01	Injury	STAAR SURGICAL COMPANY	2021-08-03	MTA	IMPLANTABLE COLLAMER LENS (ICL)	Inadequacy of Device Shape and/or Size	Intraocular Pressure Increased; Appropriate Clinical Signs, Symptoms, Conditions Term / Code Not Available	P030016	NA	1	Event Description: THE REPORTER INDICATED THE SURGEON IMPLANTED A 13.7MM MICL13.7 IMPLANTABLE COLLAMER LENS, -10.00 DIOPTER, IN THE PATIENTS LEFT EYE (OS), ON (B)(6) 2021. THE LENS WAS EXPLANTED ON (B)(6) 2021 DUE TO EXCESSIVE VAULTING, ANGLE CLOSURE AND ELEVATED INTRAOCULAR PRESSURE (IOP). THE LENS WAS REPLACED WITH A SHORTER LENS AND THE PROBLEM WAS RESOLVED. THE CAUSE OF THE EVENT WAS OTHER (W…	Lens Exchange	Resolved
https://www.accessdata.fda.gov/scripts/cdrh/cfdocs/cfMAUDE/Detail.CFM?MDRFOI__ID=12341302&pc=MTA	2023826-2021-03173	2021-07-16	Injury	STAAR SURGICAL COMPANY	2021-08-19	MTA	IMPLANTABLE COLLAMER LENS (ICL)	Inadequacy of Device Shape and/or Size	Intraocular Pressure Increased; Appropriate Clinical Signs, Symptoms, Conditions Term / Code Not Available	P030016	NA	1	Event Description: THE REPORTER INDICATED THAT THE SURGEON IMPLANTED A 13.2MM MICL 13.2, -13.0 DIOPTER, IMPLANTABLE COLLAMER LENS INTO THE PATIENT'S LEFT EYE (OS) ON (B)(6) 2021. THE LENS WAS REPLACED WITH A SHORTER LENGTH LENS DUE TO ELEVATED IOP(32MMHG) WITHOUT PUPIL BLOCK AND ANGLE CLOSURE (ASSESSED ON (B)(6) 2021) AND EXCESSIVE VAULT ON (B)(6) 2021. THIS RESOLVED THE PROBLEM. CAUSE OF THE EVE…	Lens Exchange	Resolved
https://www.accessdata.fda.gov/scripts/cdrh/cfdocs/cfMAUDE/Detail.CFM?MDRFOI__ID=12628814&pc=MTA	2023826-2021-03987	2021-09-01	Injury	STAAR SURGICAL COMPANY	2021-10-13	MTA	IMPLANTABLE COLLAMER LENS (ICL)	Inadequacy of Device Shape and/or Size	Intraocular Pressure Increased; Appropriate Clinical Signs, Symptoms, Conditions Term / Code Not Available	NA	NA	1	Event Description: THE REPORTER INDICATED THE SURGEON IMPLANTED A 13.2MM VICM5_13.2 IMPLANTABLE COLLAMER LENS, -10.00 DIOPTER, IN THE PATIENTS RIGHT EYE (OD), ON (B)(6) 2021. THE LENS WAS EXPLANTED LATER THAT SAME DAY DUE TO EXCESSIVE VAULTING, ANGLE CLOSURE AND ELEVATED INTRAOCULAR PRESSURE (IOP). THE INCISION WAS ENLARGED AND ADDITIONAL SUTURE WAS REQUIRED. THE PROBLEM WAS RESOLVED WITH EXPLANT…	Lens Extraction	Resolved
https://www.accessdata.fda.gov/scripts/cdrh/cfdocs/cfMAUDE/Detail.CFM?MDRFOI__ID=12606079&pc=MTA	2023826-2021-03851	2021-09-10	Injury	STAAR SURGICAL COMPANY	2021-10-11	MTA	IMPLANTABLE COLLAMER LENS (ICL)	Inadequacy of Device Shape and/or Size	Intraocular Pressure Increased; Appropriate Clinical Signs, Symptoms, Conditions Term / Code Not Available	N/A	NA	1	Event Description: THE REPORTER INDICATED THAT THE SURGEON IMPLANTED A 13.2MM VICM5 13.2, -12.00 DIOPTER, IMPLANTABLE COLLAMER LENS INTO THE PATIENT'S RIGHT EYE (OD) ON (B)(6) 2021. THE LENS WAS REPLACED WITH A SHORTER LENGTH LENS DUE TO ELEVATED IOP(23MMHG) WITHOUT PUPIL BLOCK(ASSESSED ON (B)(6) 2021) AND ANGLE CLOSURE (ASSESED ON (B)(6) 2021), AND EXCESSIVE VAULT ON (B)(6) 2021. THIS RESOLVED T…	Lens Exchange	Resolved
https://www.accessdata.fda.gov/scripts/cdrh/cfdocs/cfMAUDE/Detail.CFM?MDRFOI__ID=13256529&pc=MTA	2023826-2022-00157	2021-09-16	Injury	STAAR SURGICAL COMPANY	2022-01-13	MTA	IMPLANTABLE COLLAMER LENS (ICL)	Inadequacy of Device Shape and/or Size	Intraocular Pressure Increased; Appropriate Clinical Signs, Symptoms, Conditions Term / Code Not Available	NA	NA	1	Event Description: THE REPORTER INDICATED THAT THE SURGEON IMPLANTED A 13.2MM VICMO13.2; -17.50 DIOPTER IMPLANTABLE COLLAMER LENS INTO THE PATIENT'S RIGHT EYE (OD) ON (B)(6) 2021. THE PATIENT EXPERIENCED EXCESSIVE VAULTING; SIGNIFICANT REDUCTION OF IRIDO-CORNEAL ANGLES. ON (B)(6) 2021 THE LENS WAS EXCHANGED WITH A SHORTER LENGTH LENS AND THIS RESOLVED THE PROBLEM. THE CAUSE OF THE EVENT WAS REPOR…	Lens Exchange	Resolved
https://www.accessdata.fda.gov/scripts/cdrh/cfdocs/cfMAUDE/Detail.CFM?MDRFOI__ID=13206192&pc=MTA	2023826-2022-00079	2021-10-25	Injury	STAAR SURGICAL COMPANY	2022-01-10	MTA	IMPLANTABLE COLLAMER LENS (ICL)	Inadequacy of Device Shape and/or Size	Intraocular Pressure Increased; Appropriate Clinical Signs, Symptoms, Conditions Term / Code Not Available	N/A	NA	1	Event Description: THE REPORTER INDICATED THAT THE SURGEON IMPLANTED A 12.6MM VICM5 12.6, -08.00 DIOPTER, IMPLANTABLE COLLAMER LENS INTO THE PATIENT'S LEFT EYE (OS) ON (B)(6) 2021. THE LENS WAS REPLACED WITH A SHORTER LENGTH LENS DUE TO EXCESSIVE VAULT AND ANGLE CLOSURE WITH ELEVATED IOP (24MMHG ASSESSED ON (B)(6) 2021) ON (B)(6) 2021. THIS RESOLVED THE PROBLEM. CAUSE OF THE EVENT IS REPORTED AS …	Lens Exchange	Resolved
https://www.accessdata.fda.gov/scripts/cdrh/cfdocs/cfMAUDE/Detail.CFM?MDRFOI__ID=13362155&pc=MTA	2023826-2022-00349	2021-12-09	Injury	STAAR SURGICAL COMPANY	2022-01-26	MTA	IMPLANTABLE COLLAMER LENS (ICL)	Inadequacy of Device Shape and/or Size	Intraocular Pressure Increased; Appropriate Clinical Signs, Symptoms, Conditions Term / Code Not Available	NA	NA	1	Event Description: THE REPORTER INDICATED THAT THE SURGEON IMPLANTED A 13.7MM VICM5_13.7; -11.50 DIOPTER IMPLANTABLE COLLAMER LENS INTO THE PATIENT'S LEFT EYE (OS) ON (B)(6) 2021. THE PATIENT EXPERIENCED EXCESSIVE VAULTING; SIGNIFICANT REDUCTION OF IRIDO-CORNEAL ANGLES; ANGLE CLOSURE WITH ELEVATED INTRAOCULAR PRESSURE; AND ON (B)(6) 2021 THE LENS WAS EXPLANTED. THIS RESOLVED THE PROBLEM. THE CAUS…	Lens Extraction	Resolved
https://www.accessdata.fda.gov/scripts/cdrh/cfdocs/cfMAUDE/Detail.CFM?MDRFOI__ID=15179534&pc=MTA	2023826-2022-02576	2022-04-12	Injury	STAAR SURGICAL COMPANY	2022-08-05	MTA	IMPLANTABLE COLLAMER LENS (ICL)	Inadequacy of Device Shape and/or Size	Intraocular Pressure Increased; Appropriate Clinical Signs, Symptoms, Conditions Term / Code Not Available	P030016	NA	1	Event Description: THE REPORTER INDICATED THAT A 13.2MM VICM5 13.2 IMPLANTABLE COLLAMER LENS OF -10.0 DIOPTER WAS IMPLANTED INTO THE PATIENTS LEFT EYE (OS) ON (B)(6) 2022. ON (B)(6) 2022 THE LENS WAS EXCHANGED FOR A SHORTER LENGTH LENS DUE TO EXCESSIVE VAULT; ANGLE CLOSURE WITH ELEVATED IOP. THE REPLACEMENT LENS RESOLVED THE PROBLEM. Manufacturer Narrative: (B)(4). LENS WORK ORDER SEARCH- NO SIMI…	Lens Exchange	Resolved
https://www.accessdata.fda.gov/scripts/cdrh/cfdocs/cfMAUDE/Detail.CFM?MDRFOI__ID=14929821&pc=MTA	2023826-2022-02102	2022-05-20	Injury	STAAR SURGICAL COMPANY	2022-07-06	MTA	IMPLANTABLE COLLAMER LENS (ICL)	Inadequacy of Device Shape and/or Size	Intraocular Pressure Increased; Appropriate Clinical Signs, Symptoms, Conditions Term / Code Not Available	P030016	NA	1	Event Description: THE REPORTER INDICATED THAT A 13.2MM VICMO13.2 IMPLANTABLE COLLAMER LENS OF -11.00 DIOPTER WAS IMPLANTED INTO THE PATIENT'S RIGHT EYE (OD) ON (B)(6) 2022. ON (B)(6) 2022 THE LENS WAS EXCHANGED WITH A SHORTER LENGTH LENS OF DIFFERENT POWER DUE TO EXCESSIVE VAULT, SIGNIFICANT REDUCTION OF IRIDOCORNEAL ANGLES, ANGLE CLOSURE WITH ELEVATED INTROCULAR PRESSURE AND UNREACTIVE (FIXED) …	Lens Exchange	Resolved
https://www.accessdata.fda.gov/scripts/cdrh/cfdocs/cfMAUDE/Detail.CFM?MDRFOI__ID=16916212&pc=MTA	2023826-2023-01798	2023-02-23	Injury	STAAR SURGICAL COMPANY	2023-05-11	MTA	IMPLANTABLE COLLAMER LENS (ICL)	Inadequacy of Device Shape and/or Size	Intraocular Pressure Increased; Appropriate Clinical Signs, Symptoms, Conditions Term / Code Not Available	P030016	NA	1	Event Description: THE REPORTER INDICATED THAT THE SURGEON IMPLANTED A 13.2MM VICM5_13.2; -6.00 DIOPTER IMPLANTABLE COLLAMER LENS INTO THE PATIENT'S LEFT EYE (OS) ON (B)(6) 2023. THE PATIENT EXPERIENCED EXCESSIVE VAULTING; ELEVATED INTRAOCULAR PRESSURE; SIGNIFICANT REDUCTION OF IRIDO-CORNEAL ANGLES; THE LENS WAS EXPLANTED ON THIS SAME DATE. ON (B)(6) 2023 A REPLACEMENT LENS OF SHORTER LENGTH AND …	Lens Exchange	Resolved
https://www.accessdata.fda.gov/scripts/cdrh/cfdocs/cfMAUDE/Detail.CFM?MDRFOI__ID=17216375&pc=MTA	2023826-2023-02434	2023-04-25	Injury	STAAR SURGICAL COMPANY	2023-06-28	MTA	IMPLANTABLE COLLAMER LENS (ICL)	Inadequacy of Device Shape and/or Size	Intraocular Pressure Increased; Appropriate Clinical Signs, Symptoms, Conditions Term / Code Not Available	P030016	NA	1	Event Description: THE REPORTER INDICATED THAT THE SURGEON IMPLANTED A 13.2MM VICM5 13.2, -14.00 DIOPTER, IMPLANTABLE COLLAMER LENS INTO THE PATIENT'S RIGHT EYE (OD) ON (B)(6)2023. ELEVATED IOP(22MMHG) WITHOUT PUPIL BLOCK AND ANGLE CLOSURE(ASSESSED ON (B)(6)2023), UNREACTIVE(FIXED) PUPIL, AND EXCESSIVE VAULT WERE OBSERVED. THE LENS REMAINS IMPLANTED. CAUSE OF THE EVENT IS REPORTED AS UNKNOWN. REP…	Lens Exchange	Resolved
https://www.accessdata.fda.gov/scripts/cdrh/cfdocs/cfMAUDE/Detail.CFM?MDRFOI__ID=17279000&pc=MTA	2023826-2023-02611	2023-05-31	Injury	STAAR SURGICAL COMPANY	2023-07-07	MTA	IMPLANTABLE COLLAMER LENS (ICL)	Inadequacy of Device Shape and/or Size	Intraocular Pressure Increased; Appropriate Clinical Signs, Symptoms, Conditions Term / Code Not Available	P030016	NA	1	Event Description: THE REPORTER INDICATED THAT THE SURGEON IMPLANTED A 12.6MM VICM512.6, -09.50 DIOPTER, IMPLANTABLE COLLAMER LENS INTO THE PATIENT'S LEFT EYE (OS) ON (B)(6) 2023. THE LENS WAS REPLACED WITH A SHORTER LENGTH LENS DUE TO SIGNIFICANT REDUCTION OF IRIDOCORNEAL ANGLES, ANGLE CLOSURE WITH ELEVATED IOP(41MMHG, ASSESSED ON (B)(6) 2023), AND EXCESSIVE VAULT ON (B)(6) 2023. THIS RESOLVED T…	Lens Exchange	Resolved
https://www.accessdata.fda.gov/scripts/cdrh/cfdocs/cfMAUDE/Detail.CFM?MDRFOI__ID=18567731&pc=MTA	2023826-2024-00371	2023-11-17	Injury	STAAR SURGICAL COMPANY	2024-01-23	MTA	IMPLANTABLE COLLAMER LENS (ICL)	Inadequacy of Device Shape and/or Size	Intraocular Pressure Increased; Appropriate Clinical Signs, Symptoms, Conditions Term / Code Not Available	P030016	NA	1	Event Description: THE REPORTER INDICATED THAT A 13.2MM VICMO13.2 IMPLANTABLE COLLAMER LENS OF -10.00 DIOPTER WAS IMPLANTED INTO THE PATIENT'S RIGHT EYE (OD) ON (B)(6) 2023. ON (B)(6) 2023 THE LENS WAS EXCHANGED WITH A SHORTER LENGTH LENS DUE TO EXCESSIVE VAULT ,SIGNIFICANT REDUCTION OF IRIDOCORNEAL ANGLES AND INCREASED IOP. THIS EXCHANGE RESOLVED THE PROBLEM. CAUSE OF EVENT WAS REPORTED TO BE TH…	Lens Exchange	Resolved
https://www.accessdata.fda.gov/scripts/cdrh/cfdocs/cfMAUDE/Detail.CFM?MDRFOI__ID=18567793&pc=MTA	2023826-2024-00372	2023-11-17	Injury	STAAR SURGICAL COMPANY	2024-01-23	MTA	IMPLANTABLE COLLAMER LENS (ICL)	Inadequacy of Device Shape and/or Size	Intraocular Pressure Increased; Appropriate Clinical Signs, Symptoms, Conditions Term / Code Not Available	P030016	NA	1	Event Description: THE REPORTER INDICATED THAT A 13.2MM VICMO13.2 IMPLANTABLE COLLAMER LENS OF -13.00 DIOPTER WAS IMPLANTED INTO THE PATIENT'S LEFT EYE (OS) ON (B)(6) 2023. ON (B)(6) 2023 THE LENS WAS EXCHANGED WITH A SHORTER LENGTH LENS DUE TO EXCESSIVE VAULT ,SIGNIFICANT REDUCTION OF IRIDOCORNEAL ANGLES AND INCREASED IOP. THIS EXCHANGE RESOLVED THE PROBLEM. CAUSE OF EVENT WAS REPORTED TO BE THE…	Lens Exchange	Resolved
https://www.accessdata.fda.gov/scripts/cdrh/cfdocs/cfMAUDE/Detail.CFM?MDRFOI__ID=18568014&pc=MTA	2023826-2024-00401	2023-12-21	Malfunction	STAAR SURGICAL COMPANY	2024-01-23	MTA	IMPLANTABLE COLLAMER LENS (ICL)	Inadequacy of Device Shape and/or Size	Intraocular Pressure Increased; Appropriate Clinical Signs, Symptoms, Conditions Term / Code Not Available	P030016	NA	1	Event Description: THE REPORTER INDICATED THAT A 13.2MM VICM5_13.2 IMPLANTABLE COLLAMER LENS OF -12.50 DIOPTER WAS IMPLANTED INTO THE PATIENTS RIGHT EYE (OD) ON (B)(6) 2023. THE PATIENT EXPERIENCED EXCESSIVE VAULT, ELEVATED IOP (INTRAOCULAR PRESSURE) AND ANGLE CLOSURE. IT WAS REPORTED THAT MEDICAL OR SURGICAL INTERVENTION IS NOT NECESSARY. FOR ADDITIONAL INFORMATION THE REPORTER STATED " NO SYMPT…	Lens Retention	Resolved
https://www.accessdata.fda.gov/scripts/cdrh/cfdocs/cfMAUDE/Detail.CFM?MDRFOI__ID=12276620&pc=MTA	2023826-2021-03058	2021-07-06	Injury	STAAR SURGICAL COMPANY	2021-08-04	MTA	IMPLANTABLE COLLAMER LENS (ICL)	Inadequacy of Device Shape and/or Size; Patient-Device Incompatibility	Intraocular Pressure Increased; Appropriate Clinical Signs, Symptoms, Conditions Term / Code Not Available	NA	NA	1	Event Description: THE REPORTER INDICATED THAT THE SURGEON IMPLANTED A 12.6MM MICL12.6; -11.5 DIOPTER IMPLANTABLE COLLAMER LENS INTO THE PATIENT'S RIGHT EYE (OD) ON (B)(6) 2021. THE PATIENT EXPERIENCED EXCESSIVE VAULTING; ELEVATED IOP; SIGNIFICANT REDUCTION OF IRIDO-CORNEAL ANGLES; RETAINED VISCOELASTIC/OCUCOAT; AND ENLARGEMENT OF PI (SURGICAL) WAS PERFORMED ALONG WITH PARACENTESIS TO REDUCE IOP.…	Lens Exchange + Secondary Operation	Resolved
https://www.accessdata.fda.gov/scripts/cdrh/cfdocs/cfMAUDE/Detail.CFM?MDRFOI__ID=12271376&pc=MTA	2023826-2021-03057	2021-07-06	Injury	STAAR SURGICAL COMPANY	2021-08-03	MTA	IMPLANTABLE COLLAMER LENS (ICL)	Inadequacy of Device Shape and/or Size; Patient-Device Incompatibility	Intraocular Pressure Increased; Appropriate Clinical Signs, Symptoms, Conditions Term / Code Not Available	NA	NA	1	Event Description: THE REPORTER INDICATED THAT THE SURGEON IMPLANTED A 12.6MM MICL12.6; -11.0 DIOPTER IMPLANTABLE COLLAMER LENS INTO THE PATIENT'S LEFT EYE (OS) ON (B)(6) 2021. THE PATIENT EXPERIENCED EXCESSIVE VAULTING; ELEVATED IOP; SIGNIFICANT REDUCTION OF IRIDO-CORNEAL ANGLES; RETAINED VISCOATELASTIC/OCUCOAT; AND ENLARGEMENT OF PI (SURGICAL) WAS PERFORMED ALONG WITH PARACENTESIS TO REDUCE IOP…	Lens Exchange + Secondary Operation	Resolved
https://www.accessdata.fda.gov/scripts/cdrh/cfdocs/cfMAUDE/Detail.CFM?MDRFOI__ID=13082457&pc=MTA	2023826-2021-04967	2021-11-17	Injury	STAAR SURGICAL COMPANY	2021-12-23	MTA	IMPLANTABLE COLLAMER LENS (ICL)	Inadequacy of Device Shape and/or Size; Patient-Device Incompatibility	Intraocular Pressure Increased; Appropriate Clinical Signs, Symptoms, Conditions Term / Code Not Available	N/A	NA	1	Event Description: THE REPORTER INDICATED THAT THE SURGEON IMPLANTED A 13.2MM VICMO13.2 IMPLANTABLE COLLAMER LENS -18.0 DIOPTER INTO THE PATIENT'S RIGHT EYE (OD) ON (B)(6) 2021. THE SURGEON REPORTS EXCESSIVE VAULT, ELEVATED IOP, AND SIGNIFICANT REDUCTION OF IRIDO-CORNEAL ANGLES (ICA). REPORTEDLY, THE LENS REMAINS IMPLANTED. THE CAUSE OF THE EVENT IS REPORTED AS A PATIENT-RELATED FACTOR: "EXCESSIV…	Lens Exchange	Resolved
https://www.accessdata.fda.gov/scripts/cdrh/cfdocs/cfMAUDE/Detail.CFM?MDRFOI__ID=10537758&pc=MTA	2023826-2020-02068	2020-08-10	Injury	STAAR SURGICAL COMPANY	2020-09-15	MTA	IMPLANTABLE COLLAMER LENS (ICL)	Inadequacy of Device Shape and/or Size; Patient-Device Incompatibility; Adverse Event Without Identified Device or Use Problem	Intraocular Pressure Increased; Appropriate Clinical Signs, Symptoms, Conditions Term / Code Not Available	P030016	NA	1	Event Description: THE REPORTER INDICATED THE SURGEON IMPLANTED A 13.2MM MICL13.2 IMPLANTABLE COLLAMER LENS, -14.00 DIOPTER, IN THE PATIENTS RIGHT EYE (OD) ON (B)(6) 2020. THE LENS WAS EXPLANTED ON (B)(6) 2020 DUE TO HIGH PRESSURE. THE LENS WAS EXCHANGED FOR A DIFFERENT SIZE LENS. ADDITIONAL INFORMATION HAS BEEN REQUESTED BUT NONE HAS BEEN FORTHCOMING. IF ADDITIONAL INFORMATION IS RECEIVED, A SUP…	Lens Exchange + Secondary Operation	Not_Resolved
https://www.accessdata.fda.gov/scripts/cdrh/cfdocs/cfMAUDE/Detail.CFM?MDRFOI__ID=18341285&pc=MTA	2023826-2023-05659	NA	Malfunction	STAAR SURGICAL COMPANY	2023-12-15 05:00:00	MTA	IMPLANTABLE COLLAMER LENS (ICL)	No Apparent Adverse Event	Intraocular Pressure Increased; Appropriate Clinical Signs, Symptoms, Conditions Term / Code Not Available	P030016	NA	1	Event Description: NARROW ANTERIOR CHAMBER, ELEVATED INTRAOCULAR PRESSURE WITH PIGMENT DISPERSION AFTER ICL IMPLANTATION WAS REPORTED. LENS REMAINS IMPLANTED. IF ADDITIONAL INFORMATION IS RECEIVED A SUPPLEMENTAL MEDWATCH REPORT WILL BE SUBMITTED. Manufacturer Narrative: H6- HEALTH EFFECT- CLINICAL CODE 4581: NARROW ANTERIOR CHAMBER, PIGMENT DISPERSION (B)(4).	Lens Exchange	Unknown
https://www.accessdata.fda.gov/scripts/cdrh/cfdocs/cfMAUDE/Detail.CFM?MDRFOI__ID=14056490&pc=MTA	2023826-2022-01147	2022-03-04	Injury	STAAR SURGICAL COMPANY	2022-04-08	MTA	IMPLANTABLE COLLAMER LENS (ICL)	Off-Label Use; Adverse Event Without Identified Device or Use Problem	Intraocular Pressure Increased; Appropriate Clinical Signs, Symptoms, Conditions Term / Code Not Available	NA	NA	1	Event Description: THE REPORTER INDICATED THAT THE SURGEON IMPLANTED A 12.6MM VICM5 12.6, -5.0 DIOPTER IMPLANTABLE COLLAMER LENS INTO THE PATIENT'S RIGHT EYE (OD) ON (B)(6) 2022. THE PATIENT EXPERIENCED PIGMENT DISPERSION. ON (B)(6) 2022 ADDITIONAL SURGICAL INTERVENTION (YAG PI) AND MEDICAL INTERVENTION ( PRED FORTE, TIMO COMOD, LOTEMAX) WERE PERFORMED/PERSCRIBED PRIOR TO ICL EXPLANTATION. IT WAS…	Lens Extraction + Secondary Operation	Resolved
https://www.accessdata.fda.gov/scripts/cdrh/cfdocs/cfMAUDE/Detail.CFM?MDRFOI__ID=17846197&pc=MTA	2023826-2023-04221	2023-06-13	Injury	STAAR SURGICAL COMPANY	2023-09-29	MTA	IMPLANTABLE COLLAMER LENS (ICL)	Off-Label Use; Adverse Event Without Identified Device or Use Problem	Intraocular Pressure Increased; Appropriate Clinical Signs, Symptoms, Conditions Term / Code Not Available	P030016	NA	1	Event Description: THE REPORTER INDICATED THE SURGEON IMPLANTED A 12.1MM VICMO12.1 IMPLANTABLE COLLAMER LENS, -18.00 DIOPTER, IN THE PATIENTS RIGHT EYE (OD), ON (B)(6) 2023. THE LENS WAS EXPLANTED ON (B)(6) 2023 DUE TO ANGLE CLOSURE WITH ELEVATED INTRAOCULAR PRESSURE. THE PROBLEM WAS RESOLVED. THIS WAS THE REPLACEMENT LENS FOR MFR. REPORT # 2023826-2023-04220. THE CAUSE OF THE EVENT WAS UNKNOWN. …	Lens Exchange	Resolved
https://www.accessdata.fda.gov/scripts/cdrh/cfdocs/cfMAUDE/Detail.CFM?MDRFOI__ID=17846540&pc=MTA	2023826-2023-04220	2023-06-13	Injury	STAAR SURGICAL COMPANY	2023-09-29	MTA	IMPLANTABLE COLLAMER LENS (ICL)	Off-Label Use; Adverse Event Without Identified Device or Use Problem	Intraocular Pressure Increased; Appropriate Clinical Signs, Symptoms, Conditions Term / Code Not Available	P030016	NA	1	Event Description: THE REPORTER INDICATED THE SURGEON IMPLANTED A 12.6MM VICMO12.6 IMPLANTABLE COLLAMER LENS, -18.00 DIOPTER, IN THE PATIENTS RIGHT EYE (OD), ON (B)(6) 2023. THE LENS WAS EXPLANTED ON (B)(6) 2023 DUE TO ELEVATED INTRAOCULAR PRESSURE, SIGNIFICANT REDUCTION OF IRIDO-CORNEAL ANGLES AND PIGMENT DISPERSION. THE LENS WAS REPLACED WITH A SHORTER LENS BUT THE PROBLEM WAS NOT RESOLVED. SEE…	Lens Exchange	Not_Resolved
https://www.accessdata.fda.gov/scripts/cdrh/cfdocs/cfMAUDE/Detail.CFM?MDRFOI__ID=13552675&pc=MTA	2023826-2022-00438	2021-12-02	Injury	STAAR SURGICAL COMPANY	2022-02-17	MTA	IMPLANTABLE COLLAMER LENS (ICL)	Off-Label Use; Inadequacy of Device Shape and/or Size	Intraocular Pressure Increased; Appropriate Clinical Signs, Symptoms, Conditions Term / Code Not Available	NA	NA	1	Event Description: THE REPORTER INDICATED THE SURGEON IMPLANTED A 13.2MM VICMO13.2 IMPLANTABLE COLLAMER LENS, -08.50 DIOPTER, IN THE PATIENTS LEFT EYE (OS), ON (B)(6) 2021. THE LENS WAS EXPLANTED LATER THAT SAME DAY DUE TO EXCESSIVE VAULTING, ANGLE CLOSURE WITH ELEVATED INTRAOCULAR PRESSURE (IOP) AND THE PROBLEM WAS RESOLVED. THE CAUSE OF THE EVENT WAS UNKNOWN. Manufacturer Narrative: H3 DEVICE E…	Lens Extraction	Resolved
https://www.accessdata.fda.gov/scripts/cdrh/cfdocs/cfMAUDE/Detail.CFM?MDRFOI__ID=15068918&pc=MTA	2023826-2022-02299	2022-06-10	Injury	STAAR SURGICAL COMPANY	2022-07-20	MTA	IMPLANTABLE COLLAMER LENS (ICL)	Off-Label Use; Inadequacy of Device Shape and/or Size	Intraocular Pressure Increased; Appropriate Clinical Signs, Symptoms, Conditions Term / Code Not Available	P030016	NA	1	Event Description: THE REPORTER INDICATED THAT THE SURGEON IMPLANTED A 12.6MM VICMO12.6 IMPLANTABLE COLLAMER LENS OF DIOPTER -4.0 INTO THE PATIENT'S LEFT EYE (OS) ON (B)(6) 2022. THE LENS WAS EXCHANGED ON (B)(6) 2022 FOR A SHORTER LENGTH LENS DUE TO EXCESSIVE VAULT AND ANGLE CLOSURE WITH ELEVATED IOP. THIS RESOLVED THE PROBLEM. CAUSE OF EVENT REPORTED AS UNKNOWN. Manufacturer Narrative: HEALTH EF…	Lens Exchange	Resolved
https://www.accessdata.fda.gov/scripts/cdrh/cfdocs/cfMAUDE/Detail.CFM?MDRFOI__ID=17725919&pc=MTA	2023826-2023-04004	2023-06-28	Injury	STAAR SURGICAL COMPANY	2023-09-11	MTA	IMPLANTABLE COLLAMER LENS (ICL)	Off-Label Use; Inadequacy of Device Shape and/or Size	Intraocular Pressure Increased; Appropriate Clinical Signs, Symptoms, Conditions Term / Code Not Available	P030016	NA	1	Event Description: THE REPORTER INDICATED THAT THE SURGEON IMPLANTED A 13.2MM VICMO13.2, -13.0 DIOPTER IMPLANTABLE COLLAMER LENS INTO THE PATIENT'S RIGHT EYE (OD) ON (B)(6) 2023. THE PATIENT EXPERIENCED EXCESSIVE VAULTING AND ANGLE CLOSURE WITH ELEVATED INTRAOCULAR PRESSURE. ON THIS SAME DATE THE LENS WAS EXPLANTED AND THIS RESOLVED THE PROBLEM. THE CAUSE OF THE EVENT WAS REPORTED AS UNKNOWN. IT …	Lens Extraction	Resolved
https://www.accessdata.fda.gov/scripts/cdrh/cfdocs/cfMAUDE/Detail.CFM?MDRFOI__ID=17908804&pc=MTA	2023826-2023-04480	2023-08-19	Injury	STAAR SURGICAL COMPANY	2023-10-10	MTA	IMPLANTABLE COLLAMER LENS (ICL)	Off-Label Use; Inadequacy of Device Shape and/or Size	Intraocular Pressure Increased; Appropriate Clinical Signs, Symptoms, Conditions Term / Code Not Available	P030016	NA	1	Event Description: THE REPORTER INDICATED THAT A 12.6MM VICMO12.6 IMPLANTABLE COLLAMER LENS OF -8.50 DIOPTER WAS IMPLANTED INTO THE PATIENT'S RIGHT EYE (OD) ON (B)(6) 2023. ON (B)(6) 2023 THE LENS WAS EXPLANTED DUE TO EXCESSIVE VAULT AND ANGLE CLOSURE WITH ELEVATED IOP. THIS EXPLANT RESOLVED THE PROBLEM CAUSE OF EVENT WAS UNKNOWN. Manufacturer Narrative: H6 - DEVICE CODE 1494: OFF-LABEL USE (AGE<…	Lens Extraction	Resolved
https://www.accessdata.fda.gov/scripts/cdrh/cfdocs/cfMAUDE/Detail.CFM?MDRFOI__ID=17909001&pc=MTA	2023826-2023-04481	2023-08-19	Injury	STAAR SURGICAL COMPANY	2023-10-10	MTA	IMPLANTABLE COLLAMER LENS (ICL)	Off-Label Use; Inadequacy of Device Shape and/or Size	Intraocular Pressure Increased; Appropriate Clinical Signs, Symptoms, Conditions Term / Code Not Available	P030016	NA	1	Event Description: THE REPORTER INDICATED THAT A 12.6MM VICMO12.6 IMPLANTABLE COLLAMER LENS OF -9.50 DIOPTER WAS IMPLANTED INTO THE PATIENT'S LEFT EYE (OS) ON (B)(6) 2023. ON (B)(6) 2023 THE LENS WAS EXPLANTED DUE TO EXCESSIVE VAULT AND ANGLE CLOSURE WITH ELEVATED IOP. THIS EXPLANT RESOLVED THE PROBLEM. CAUSE OF EVENT WAS UNKNOWN. Manufacturer Narrative: H6- HEALTH EFFECT- CLINICAL CODE 4581: ANG…	Lens Extraction	Resolved
https://www.accessdata.fda.gov/scripts/cdrh/cfdocs/cfMAUDE/Detail.CFM?MDRFOI__ID=18176646&pc=MTA	2023826-2023-05183	2023-09-12	Injury	STAAR SURGICAL COMPANY	2023-11-20	MTA	IMPLANTABLE COLLAMER LENS (ICL)	Off-Label Use; Inadequacy of Device Shape and/or Size	Intraocular Pressure Increased; Appropriate Clinical Signs, Symptoms, Conditions Term / Code Not Available	P030016	NA	1	Event Description: THE REPORTER INDICATED THAT THE SURGEON IMPLANTED A 13.2MM VICM5 13.2 IMPLANTABLE COLLAMER LENS OF -8.0 DIOPTER INTO THE PATIENTS RIGHT EYE (OD) ON (B)(6) 2023. EXCESSIVE VAULT WAS OBSERVED WITH SIGNIFICANT REDUCTION OF IRIDOCORNEAL ANGLES, ELEVATED IOP AND ANGLE CLOSURE AFTER SURGERY. ON (B)(6) 2023 THE LENS WAS EXCHANGED FOR A SHORTER LENGTH AND THE PROBLEM WAS RESOLVED. Manu…	Lens Exchange	Resolved
https://www.accessdata.fda.gov/scripts/cdrh/cfdocs/cfMAUDE/Detail.CFM?MDRFOI__ID=14525966&pc=MTA	2023826-2022-01543	2022-03-23	Injury	STAAR SURGICAL COMPANY	2022-05-27	MTA	IMPLANTABLE COLLAMER LENS (ICL)	Off-Label Use; Inadequacy of Device Shape and/or Size; Adverse Event Without Identified Device or Use Problem	Intraocular Pressure Increased; Appropriate Clinical Signs, Symptoms, Conditions Term / Code Not Available	P030016	NA	1	Event Description: THE REPORTER INDICATED THAT A 13.7MM VICM5_13.7 IMPLANTABLE COLLAMER LENS OF -5.0 DIOPTER WAS IMPLANTED INTO THE PATIENT'S LEFT EYE (OS) ON (B)(6) 2021. EXCESSIVE VAULT; ELEVATED IOP; AND SIGNIFICANT ENDOTHELIAL CELL LOSS WAS OBSERVED. IOP CONTROLLED DAY AFTER SURGERY. LENS REMAINS IMPLANTED. EYE IS STABLE AND UNDER OBSERVATION. CAUSE IS UNKNOWN. Manufacturer Narrative: WEIGHT,…	Lens Retention	Unknown
https://www.accessdata.fda.gov/scripts/cdrh/cfdocs/cfMAUDE/Detail.CFM?MDRFOI__ID=12140355&pc=MTA	2023826-2021-02386	2021-06-08	Injury	STAAR SURGICAL COMPANY	2021-07-08	MTA	IMPLANTABLE COLLAMER LENS (ICL)	Inadequacy of Device Shape and/or Size	Intraocular Pressure Increased; Appropriate Clinical Signs, Symptoms, Conditions Term / Code Not Available; No Clinical Signs, Symptoms or Conditions	P030016	NA	1	Event Description: THE REPORTER INDICATED THE SURGEON IMPLANTED A 13.2MM MICL13.2 IMPLANTABLE COLLAMER LENS, -07.50 DIOPTER, IN THE PATIENTS LEFT EYE (OS) ON (B)(6) 2021. THE REPORTER INDICATED THE SURGEON PLANS TO EXPLANT AND EXCHANGE THE LENS FOR A SHORTER LENS. THE LENS REMAINED IMPLANTED. ADDITIONAL INFORMATION HAS BEEN REQUESTED BUT NONE HAS BEEN FORTHCOMING. Manufacturer Narrative: DEVICE E…	Lens Exchange	Resolved
https://www.accessdata.fda.gov/scripts/cdrh/cfdocs/cfMAUDE/Detail.CFM?MDRFOI__ID=12817115&pc=MTA	2023826-2021-04361	2021-07-23	Injury	STAAR SURGICAL COMPANY	2021-11-15	MTA	IMPLANTABLE COLLAMER LENS (ICL)	Inadequacy of Device Shape and/or Size	Intraocular Pressure Increased; Appropriate Clinical Signs, Symptoms, Conditions Term / Code Not Available; No Clinical Signs, Symptoms or Conditions	NA	NA	1	Event Description: THE REPORTER INDICATED THAT THE SURGEON IMPLANTED A 12.6MM VICM5_12.6; -7.0 DIOPTER IMPLANTABLE COLLAMER LENS INTO THE PATIENT'S RIGHT EYE (OD) ON (B)(6) 2021. ON (B)(6) 2021 THE LENS WAS EXCHANGED WITH A SHORTER LENGTH LENS DUE TO EXCESSIVE VAULTING AND ANGLE CLOSURE WITH ELEVATED INTRAOCULAR PRESSURE. THIS RESOLVED THE PROBLEM. THE CAUSE OF THE EVENT WAS REPORTED AS UNKNOWN. …	Lens Exchange	Resolved
https://www.accessdata.fda.gov/scripts/cdrh/cfdocs/cfMAUDE/Detail.CFM?MDRFOI__ID=14382243&pc=MTA	2023826-2022-01508	2022-04-08	Injury	STAAR SURGICAL COMPANY	2022-05-12	MTA	IMPLANTABLE COLLAMER LENS (ICL)	Inadequacy of Device Shape and/or Size	Intraocular Pressure Increased; Appropriate Clinical Signs, Symptoms, Conditions Term / Code Not Available; No Clinical Signs, Symptoms or Conditions	P030016	NA	1	Event Description: REPORTEDLY A 13.7MM MICL13.7 IMPLANTABLE COLLAMER LENS OF -3.5 DIOPTER WAS REMOVED DUE TO HIGH VAULT. IT WAS REPLACED WITH A SHORTER LENGTH LENS ON (B)(6) 2022. THE LENS WAS REMOVED ON (B)(6) 2022. Manufacturer Narrative: PATIENT IDENTIFIER: UNKNOWN,AGE OR DATE OF BIRTH:UNKNOWN, SEX::UNKNOWN, WEIGHT: UNKNOWN, ETHNICITY:UNKNOWN, RACE:UNKNOWN. DATE OF EVENT: UNK. CLAIM# (B)(4). M…	Lens Extraction	Resolved
https://www.accessdata.fda.gov/scripts/cdrh/cfdocs/cfMAUDE/Detail.CFM?MDRFOI__ID=16330098&pc=MTA	2023826-2023-00399	2022-12-10	Injury	STAAR SURGICAL COMPANY	2023-02-08	MTA	IMPLANTABLE COLLAMER LENS (ICL)	Inadequacy of Device Shape and/or Size	Intraocular Pressure Increased; Appropriate Clinical Signs, Symptoms, Conditions Term / Code Not Available; No Clinical Signs, Symptoms or Conditions	P030016	NA	1	Event Description: THE REPORTER INDICATED THAT A 13.2MM VICMO13.2 IMPLANTABLE COLLAMER LENS OF -15.0 DIOPTER WAS IMPLANTED INTO THE PATIENT'S RIGHT EYE (OD) ON (B)(6) 2022. EXCESSIVE VAULT, ELEVATED IOP WITHOUT PUPIL BLOCK, SIGNIFICANT REDUCTION OF IRIDOCORNEAL ANGLES, ANGLE CLOSURE WITH ELEVATED IOP, AND PIGMENT DISPERSION WERE OBSERVED. CAUSE REPORTED AS UNKNOWN. REPORTEDLY, "HIGHER VAULT THAN …	Lens Retention	Resolved
https://www.accessdata.fda.gov/scripts/cdrh/cfdocs/cfMAUDE/Detail.CFM?MDRFOI__ID=12052902&pc=MTA	2023826-2021-02043	2021-05-18	Injury	STAAR SURGICAL COMPANY	2021-06-23	MTA	IMPLANTABLE COLLAMER LENS (ICL)	Inadequacy of Device Shape and/or Size; Adverse Event Without Identified Device or Use Problem	Intraocular Pressure Increased; Appropriate Clinical Signs, Symptoms, Conditions Term / Code Not Available; No Clinical Signs, Symptoms or Conditions	P030016	NA	1	Event Description: THE REPORTER INDICATED THE SURGEON IMPLANTED A 13.2MM MICL13.2 IMPLANTABLE COLLAMER LENS, -07.50 DIOPTER, IN THE PATIENTS LEFT EYE (OS) ON (B)(6) 2021. THE LENS WAS EXPLANTED ON (B)(6) 2021 AND EXCHANGED FOR A SHORTER LENS. THE LENS WAS DISCARDED. ADDITIONAL INFORMATION HAS BEEN REQUESTED BUT NONE HAS BEEN FORTHCOMING. Manufacturer Narrative: B5: THE LENS WAS EXPLANTED DUE TO L…	Lens Exchange	Resolved
https://www.accessdata.fda.gov/scripts/cdrh/cfdocs/cfMAUDE/Detail.CFM?MDRFOI__ID=6795690&pc=MTA	2023826-2017-01321	2017-06-28	Injury	STAAR SURGICAL COMPANY	2017-08-15	MTA	ICL (IMPLANTABLE COLLAMER LENS)	Device Operates Differently Than Expected	Intraocular Pressure Increased; Blurred Vision	N/A	NA	1	Event Description: THE REPORTER INDICATED THAT THE SURGEON IMPLANTED A 13.2MM VICMO13.2 IMPLANTABLE COLLAMER LENS, -18.0 DIOPTER, IN THE PATIENT'S RIGHT EYE (OD) ON (B)(6) 2017. THE PATIENT EXPERIENCED REFRACTIVE SURPRISE, ELEVATED IOP. IN ONE WEEK POST-OP, THE SURGEON STATED THAT THE PATIENT HAS BEEN TREATED BY MEDICATIONS: COSOPT, SPERSADEX, AND DIAMOX. MULTIPLE ATTEMPS TO GET UPDATED INFORMATI…	Lens Retention	Unknown
https://www.accessdata.fda.gov/scripts/cdrh/cfdocs/cfMAUDE/Detail.CFM?MDRFOI__ID=6795695&pc=MTA	2023826-2017-01322	2017-06-28	Injury	STAAR SURGICAL COMPANY	2017-08-15	MTA	ICL (IMPLANTABLE COLLAMER LENS)	Device Operates Differently Than Expected	Intraocular Pressure Increased; Blurred Vision	N/A	NA	1	Event Description: THE REPORTER INDICATED THAT THE SURGEON IMPLANTED A 13.2MM VICMO13.2 IMPLANTABLE COLLAMER LENS, -13.0 DIOPTER, IN THE PATIENT'S RIGHT EYE (OD) ON (B)(6) 2017. THE PATIENT EXPERIENCED REFRACTIVE SURPRISE, ELEVATED IOP. IN ONE WEEK POST-OP, THE SURGEON STATED THAT THE PATIENT IOP IS 26.7MMHG, AND HAS BEEN TREATED BY TRUSOPT, AND TOBRADEX MEDICATIONS. THE SURGEON ALSO NOTED THAT T…	Lens Retention	Resolved
https://www.accessdata.fda.gov/scripts/cdrh/cfdocs/cfMAUDE/Detail.CFM?MDRFOI__ID=12761919&pc=MTA	2023826-2021-04212	2021-06-24	Injury	STAAR SURGICAL COMPANY	2021-11-07	MTA	IMPLANTABLE COLLAMER LENS (ICL)	Misfocusing	Intraocular Pressure Increased; Blurred Vision	P030016	NA	1	Event Description: THE REPORTER INDICATED THE SURGEON IMPLANTED A 12.6MM MICL12.6 IMPLANTABLE COLLAMER LENS, -07.50 DIOPTER, IN THE PATIENTS LEFT EYE (OS) ON (B)(6) 2021. ON (B)(6) 2021, THE SURGEON ENLARGED THE PIS BY YAG DUE TO ELEVATED INTRAOCULAR PRESSURE (IOP) (28MMHG) AND SLIGHT VA BLURRINESS PER PATIENT. THE IOP RESOLVED AND WAS 25MMHG SAME DAY. BY (B)(6) 2021 THE IOP WAS 14MMHG. THIS WAS …	Lens Retention + Secondary Operation	Resolved
https://www.accessdata.fda.gov/scripts/cdrh/cfdocs/cfMAUDE/Detail.CFM?MDRFOI__ID=17343177&pc=MTA	2023826-2023-02983	2023-03-14	Injury	STAAR SURGICAL COMPANY	2023-07-18	MTA	IMPLANTABLE COLLAMER LENS (ICL)	Inadequacy of Device Shape and/or Size	Intraocular Pressure Increased; Blurred Vision; Appropriate Clinical Signs, Symptoms, Conditions Term / Code Not Available	P030016	NA	1	Event Description: THE REPORTER INDICATED THAT A 13.2MM VICM5_13.2 IMPLANTABLE COLLAMER LENS OF -11.50 DIOPTER WAS IMPLANTED INTO THE PATIENT'S RIGHT EYE (OD) ON (B)(6) 2023. ON (B)(6) 2023 THE LENS WAS EXCHANGED FOR A SHORTER LENGTH LENS DUE TO EXCESSIVE VAULT, ANGLE CLOSURE WITH ELEVATED IOP (INTRAOCULAR PRESSURE) AND BLURRED VISION. THIS EXCHANGE RESOLVED THE PROBLEM. THE REPORTER STATES THE C…	Lens Exchange	Resolved
https://www.accessdata.fda.gov/scripts/cdrh/cfdocs/cfMAUDE/Detail.CFM?MDRFOI__ID=17343354&pc=MTA	2023826-2023-02984	2023-03-14	Injury	STAAR SURGICAL COMPANY	2023-07-18	MTA	IMPLANTABLE COLLAMER LENS (ICL)	Inadequacy of Device Shape and/or Size	Intraocular Pressure Increased; Blurred Vision; Appropriate Clinical Signs, Symptoms, Conditions Term / Code Not Available	P030016	NA	1	Event Description: THE REPORTER INDICATED THAT A 13.2MM VICM5_13.2 IMPLANTABLE COLLAMER LENS OF -11.50 DIOPTER WAS IMPLANTED INTO THE PATIENT'S LEFT EYE (OS) ON (B)(6) 2023. ON (B)(6) 2023 THE LENS WAS EXCHANGED FOR A SHORTER LENGTH LENS DUE TO EXCESSIVE VAULT, SIGNIFICANT REDUCTION OF IRIDOCORNEAL ANGLES AND BLURRED VISION. THIS EXCHANGE RESOLVED THE PROBLEM. THE REPORTER STATES THE CAUSE OF THI…	Lens Exchange	Resolved
https://www.accessdata.fda.gov/scripts/cdrh/cfdocs/cfMAUDE/Detail.CFM?MDRFOI__ID=11135946&pc=MTA	2023826-2021-00043	2020-12-07	Injury	STAAR SURGICAL COMPANY	2021-01-07	MTA	IMPLANTABLE COLLAMER LENS (ICL)	Misfocusing; Inadequacy of Device Shape and/or Size	Intraocular Pressure Increased; Blurred Vision; Appropriate Clinical Signs, Symptoms, Conditions Term / Code Not Available	N/A	NA	1	Event Description: THE REPORTER INDICATED THE SURGEON IMPLANTED A 13.2MM VICM6_13.2 IMPLANTABLE COLLAMER LENS, DIOPTER -1.5 INTO THE PATIENT'S RIGHT EYE (OD) ON (B)(6) 2020. THE SURGEON REPORTS EXCESSIVE VAULT, ANGLE CLOSURE, AND ELEVATED IOP. ON (B)(6) 2020 THE LENS WAS REPOSITIONED. REPORTEDLY THE IOP AND VAULT ARE BETTER AFTER REPOSITIONING. THE CAUSE OF THE EVENT IS REPORTED AS UNKNOWN. Manuf…	Lens Extraction	Resolved
https://www.accessdata.fda.gov/scripts/cdrh/cfdocs/cfMAUDE/Detail.CFM?MDRFOI__ID=11135969&pc=MTA	2023826-2021-00044	2020-12-07	Injury	STAAR SURGICAL COMPANY	2021-01-07	MTA	IMPLANTABLE COLLAMER LENS (ICL)	Misfocusing; Inadequacy of Device Shape and/or Size	Intraocular Pressure Increased; Blurred Vision; Appropriate Clinical Signs, Symptoms, Conditions Term / Code Not Available	N/A	NA	1	Event Description: THE REPORTER INDICATED THE SURGEON IMPLANTED A 13.2MM VICM6_13.2 IMPLANTABLE COLLAMER LENS, DIOPTER -1.5 INTO THE PATIENT'S LEFT EYE (OS) ON (B)(6) 2020. THE SURGEON REPORTS EXCESSIVE VAULT, ANGLE CLOSURE, AND ELEVATED IOP. ON (B)(6) 2020 THE LENS WAS REPOSITIONED. REPORTEDLY THE IOP AND VAULT ARE BETTER AFTER REPOSITIONING. THE CAUSE OF THE EVENT IS REPORTED AS UNKNOWN. Manufa…	Lens Extraction	Resolved
https://www.accessdata.fda.gov/scripts/cdrh/cfdocs/cfMAUDE/Detail.CFM?MDRFOI__ID=15195867&pc=MTA	2023826-2022-02598	2022-07-08	Injury	STAAR SURGICAL COMPANY	2022-08-09	MTA	IMPLANTABLE COLLAMER LENS (ICL)	Misfocusing; Inadequacy of Device Shape and/or Size	Intraocular Pressure Increased; Blurred Vision; Appropriate Clinical Signs, Symptoms, Conditions Term / Code Not Available	P030016	NA	1	Event Description: THE REPORTER INDICATED THE SURGEON IMPLANTED A 13.7MM VICM5_13.7 IMPLANTABLE COLLAMER LENS, -10.50 DIOPTER, INTO THE PATIENTS RIGHT EYE (OD) ON (B)(6) 2022. THE LENS WAS EXPLANTED ON (B)(6) 2022 DUE TO EXCESSIVE VAULTING, SIGNIFICANT REDUCTION OF IRIDO-CORNEAL ANGLES AND BLURRED VISION. THE LENS WAS REPLACED WITH A SHORTER LENS AND THE PROBLEM WAS RESOLVED. MEDICATION WAS ADMIN…	Lens Exchange	Resolved
https://www.accessdata.fda.gov/scripts/cdrh/cfdocs/cfMAUDE/Detail.CFM?MDRFOI__ID=16750641&pc=MTA	2023826-2023-01227	2023-02-19	Injury	STAAR SURGICAL COMPANY	2023-04-17	MTA	IMPLANTABLE COLLAMER LENS (ICL)	Misfocusing; Inadequacy of Device Shape and/or Size	Intraocular Pressure Increased; Blurred Vision; Appropriate Clinical Signs, Symptoms, Conditions Term / Code Not Available	P030016	NA	1	Event Description: THE REPORTER INDICATED THAT THE SURGEON IMPLANTED A 13.2MM VICMO13.2, -6.5 DIOPTER, IMPLANTABLE COLLAMER LENS INTO THE PATIENT'S RIGHT EYE (PD) ON (B)(6) 2023. THE LENS WAS REPLACED WITH A SHORTER LENGTH LENS DUE TO ELEVATED IOP(60MMHG) WITHOUT PUPIL BLOCK AND ANGLE CLOSURE(ASSESED ON 19/FEB/2023), SIGNIFICANT REDUCTION OF IRIDO-CORNEAL ANGLES, BLURRED VISION, AND EXCESSIVE VAU…	Lens Exchange	Resolved
https://www.accessdata.fda.gov/scripts/cdrh/cfdocs/cfMAUDE/Detail.CFM?MDRFOI__ID=10544158&pc=MTA	2023826-2020-02118	2020-08-17	Injury	STAAR SURGICAL COMPANY	2020-09-16	MTA	IMPLANTABLE COLLAMER LENS (ICL)	Misfocusing; Inadequacy of Device Shape and/or Size; Patient-Device Incompatibility; Adverse Event Without Identified Device or Use Problem	Intraocular Pressure Increased; Blurred Vision; Appropriate Clinical Signs, Symptoms, Conditions Term / Code Not Available	P030016	NA	1	Event Description: THE REPORTER INDICATED THAT THE SURGEON IMPLANTED A 12.6MM MICL12.6 IMPLANTABLE COLLAMER LENS, -14.5 DIOPTER, INTO THE PATIENT'S EYE ON (B)(6) 2020. ON (B)(6) 2020 THE SURGEON EXPLANTED THE LENS DUE TO ELEVATED IOP. Manufacturer Narrative: CLAIM#: (B)(4). Manufacturer Narrative: H3-DEVICE EVALUATION: THE LENS WAS RETURNED DRY IN A SPECIMEN CUP WITH RESIDUE ON THE PRODUCT. VISUA…	Lens Exchange + Secondary Operation	Resolved
https://www.accessdata.fda.gov/scripts/cdrh/cfdocs/cfMAUDE/Detail.CFM?MDRFOI__ID=10551350&pc=MTA	2023826-2020-02119	2020-08-17	Injury	STAAR SURGICAL COMPANY	2020-09-17	MTA	IMPLANTABLE COLLAMER LENS (ICL)	Misfocusing; Inadequacy of Device Shape and/or Size; Patient-Device Incompatibility; Adverse Event Without Identified Device or Use Problem	Intraocular Pressure Increased; Blurred Vision; Appropriate Clinical Signs, Symptoms, Conditions Term / Code Not Available	P030016	NA	1	Event Description: THE REPORTER INDICATED THAT THE SURGEON IMPLANTED A 12.6MM MICL12.6 IMPLANTABLE COLLAMER LENS, -14.0 DIOPTER, INTO THE PATIENT'S EYE ON (B)(6) 2020. ON (B)(6) 2020 THE SURGEON EXPLANTED THE LENS DUE TO ELEVATED IOP. Manufacturer Narrative: B5-ADDITIONAL INFORMATION: LENS HAD BEEN IMPLANTED IN THE OS EYE. ADDITIONAL SYMPTOMS REPORTED: EXCESSIVE VAULT, ANGLE CLOSURE, BLURRED VISI…	Lens Exchange + Secondary Operation	Resolved
https://www.accessdata.fda.gov/scripts/cdrh/cfdocs/cfMAUDE/Detail.CFM?MDRFOI__ID=16309075&pc=MTA	2023826-2023-00445	NA	Injury	STAAR SURGICAL COMPANY	2023-02-06 05:00:00	MTA	IMPLANTABLE COLLAMER LENS (ICL)	Misfocusing; Off-Label Use; Inadequacy of Device Shape and/or Size	Intraocular Pressure Increased; Blurred Vision; Halo	P030016	NA	1	Event Description: THE REPORTER INDICATED THAT THE SURGEON IMPLANTED A 12.6MM VICM5_12.6; -9.5 DIOPTER IMPLANTABLE COLLAMER LENS INTO THE PATIENT'S RIGHT EYE (OD) ON (B)(6) 2022. THE PATIENT EXPERIENCED LOW VAULTING WITH ELEVATED INTRAOCULAR PRESSURE; GLARE/HALOES; BLURRED VISION. ON (B)(6) 2023 THE LENS WAS EXPLANTED. ON THIS SAME DATE IN A SEPARATE SURGERY A REPLACEMENT LENS OF LONGER LENGTH WA…	Lens Exchange	Resolved
https://www.accessdata.fda.gov/scripts/cdrh/cfdocs/cfMAUDE/Detail.CFM?MDRFOI__ID=14057555&pc=MTA	2023826-2022-01148	NA	Injury	STAAR SURGICAL COMPANY	2022-04-08 04:00:00	MTA	IMPLANTABLE COLLAMER LENS (ICL)	Adverse Event Without Identified Device or Use Problem	Intraocular Pressure Increased; Blurred Vision; Halo; Appropriate Clinical Signs, Symptoms, Conditions Term / Code Not Available	NA	NA	1	Event Description: THE REPORTER INDICATED THAT THE SURGEON IMPLANTED A 12.6MM VICM5_12.6, -4.50 DIOPTER IMPLANTABLE COLLAMER LENS INTO THE PATIENT'S LEFT EYE (OS) ON (B)(6)2021. THE PATIENT EXPERIENCED ELEVATED INTRAOCULAR PRESSURE. ON (B)(6)2021 SECONDARY YAG WAS PERFORMED AND THE PROBLEM RESOLVED. IT WAS REPORTER THAT INTRAOCULAR PRESSURE WAS TAPER DOWN TO 17MMHG. THE CAUSE OF THE EVENT WAS REP…	Lens Retention + Secondary Operation	Resolved
https://www.accessdata.fda.gov/scripts/cdrh/cfdocs/cfMAUDE/Detail.CFM?MDRFOI__ID=5089564&pc=MTA	2023826-2015-01252	2015-08-19	Injury	STAAR SURGICAL COMPANY	2015-09-18	MTA	ICL (IMPLANTABLE COLLAMER LENS)	Appropriate Term/Code Not Available	Intraocular Pressure Increased; Blurred Vision; No Code Available	P030016	NA	1	Event Description: THE PATIENT REPORTED THE SURGEON IMPLANTED A 13.2MM MICL13.2 IMPLANTABLE COLLAMER LENS, -9.0 DIOPTER, IN HIS RIGHT EYE (OD) ON (B)(6) 2015. THE PATIENT REPORTED THE SURGERY WENT WELL BUT AT ONE DAY POST-OP, HE COULDN'T SEE OUT OF HIS EYE, HE HAD TROUBLE FOCUSING AND IT WAS LIKE LOOKING THROUGH A WHITE SHEET OF PAPER. HE WENT IN FOR A FOLLOW-UP VISIT THAT SAME DAY AND IT WAS NOT…	Lens Extraction + Secondary Operation	Unknown
https://www.accessdata.fda.gov/scripts/cdrh/cfdocs/cfMAUDE/Detail.CFM?MDRFOI__ID=6715656&pc=MTA	2023826-2017-01142	2017-06-06	Injury	STAAR SURGICAL COMPANY	2017-07-14	MTA	IMPLANTABLE COLLAMER LENS (ICL)	Device Operates Differently Than Expected	Intraocular Pressure Increased; Blurred Vision; No Code Available	N/A	NA	1	Event Description: THE REPORTER INDICATED THAT THE SURGEON IMPLANTED A 13.2 MM VICMO13.2, -6.00 DIOPTER, IMPLANTABLE COLLAMER LENS IN THE PATIENT'S RIGHT EYE (OD) ON (B)(6) 2017. ON (B)(6) 2017, THE LENS WAS EXPLANTED DUE TO BLURRED VISION AND ELEVATED IOP. AN AHMED VALVE WAS IMPLANTED IN THE PATIENT. Manufacturer Narrative: ADDITIONAL INFORMATION RECEIVED: PATIENT IS FINE. BCVA IS 10/10 AND IOP …	Lens Extraction + Secondary Operation	Resolved
https://www.accessdata.fda.gov/scripts/cdrh/cfdocs/cfMAUDE/Detail.CFM?MDRFOI__ID=7467360&pc=MTA	2023826-2018-00604	2018-03-26	Injury	STAAR SURGICAL COMPANY	2018-04-26	MTA	IMPLANTABLE COLLAMER LENS	Device Operates Differently Than Expected; Adverse Event Without Identified Device or Use Problem	Intraocular Pressure Increased; Blurred Vision; No Code Available	NA	NA	1	Event Description: THE REPORTER INDICATED THAT THE SURGEON IMPLANTED A 13.2MM VICM5_13.2 IMPLANTABLE COLLAMER LENS, -13.0 DIOPTER INTO THE PATIENT'S RIGHT EYE (OD) ON (B)(6) 2018. THE SURGEON REPORTS LOSS OF BCVA AND ELEVATED IOP. THE LENS REMAINS IMPLANTED. REPORTEDLY, TIMOLOL WAS ADMINISTERED TO THE PATIENT IN ORDER TO LOWER IOP. THE SURGEON NOTES FLUCTUATING REFRACTION. NO UPDATED INFORMATION …	Lens Exchange	Not_Resolved
https://www.accessdata.fda.gov/scripts/cdrh/cfdocs/cfMAUDE/Detail.CFM?MDRFOI__ID=6661714&pc=MTA	2023826-2017-01012	2017-02-27	Injury	STAAR SURGICAL COMPANY	2017-06-22	MTA	IMPLANTABLE COLLAMER LENS (ICL)	Inadequacy of Device Shape and/or Size	Intraocular Pressure Increased; Blurred Vision; No Code Available	N/A	NA	1	Event Description: THE REPORTER INDICATED THAT THE SURGEON IMPLANTED A 13.2MM VICMO13.2, DIOPTER -12.50 IMPLANTABLE COLLAMER LENS, INTO THE PATIENT'S RIGHT EYE (OD) ON (B)(6) 2017. ON (B)(6) 2017 THE LENS WAS EXCHANGED FOR A SHORTER LENS DUE TO THE PATIENT EXPERIENCING EXCESSIVE VAULT, LOSS OF BCVA, ELEVATED IOP, AND SIGNIFICANT REDUCTION OF IRIDO-CORNEAL ANGLES. SECONDARY INTERVENTION INCLUDES E…	Lens Exchange	Resolved
https://www.accessdata.fda.gov/scripts/cdrh/cfdocs/cfMAUDE/Detail.CFM?MDRFOI__ID=6802614&pc=MTA	2023826-2017-01350	2017-07-07	Injury	STAAR SURGICAL COMPANY	2017-08-17	MTA	IMPLANTABLE COLLAMER LENS	Inadequacy of Device Shape and/or Size	Intraocular Pressure Increased; Blurred Vision; No Code Available	N/A	NA	1	Event Description: THE REPORTER INDICATED THAT THE SURGEON IMPLANTED A 13.2MM VICMO13.2 IMPLANTABLE COLLAMER LENS, -7.50 DIOPTER, IN THE PATIENT'S LEFT EYE (OS) ON (B)(6) 2017. AFTER IMPLANTATION, THE PATIENT EXPERIENCED EXCESSIVE VAULT, LOSS OF BCVA, ANGLE CLOSURE WITH ELEVATED IOP, SIGNIFICANT REDUCTION OF IRIDO-CORNEAL ANGLES, AND BLURRED VISION. AT A LATER DATE THE SURGEON EXPLANTED THE LENS,…	Lens Retention + Secondary Operation	Resolved
https://www.accessdata.fda.gov/scripts/cdrh/cfdocs/cfMAUDE/Detail.CFM?MDRFOI__ID=7441301&pc=MTA	2023826-2018-00565	2017-10-17	Injury	STAAR SURGICAL COMPANY	2018-04-18	MTA	IMPLANTABLE COLLAMER LENS (ICL)	Inadequacy of Device Shape and/or Size	Intraocular Pressure Increased; Blurred Vision; No Code Available	NA	NA	1	Event Description: THE REPORTER INDICATED THAT THE SURGEON IMPLANTED A 12.6MM VICH12.6 IMPLANTABLE COLLAMER LENS, -10.0 DIOPTER, INTO THE PATIENT'S RIGHT EYE (OD) ON (B)(6) 2017. THE SURGEON REPORTS EXCESSIVE VAULT, REFRACTIVE SURPRISE, LOSS OF BCVA, ELEVATED IOP, SIGNIFICANT REDUCTION OF IRIDO-CORNEAL ANGLES (ICA), AND ANTERIOR CHAMBER IRRIGATION/EVACUATION OF VISCO/FLUIDS. ON (B)(6) 2018 THE LE…	Lens Exchange	Resolved
https://www.accessdata.fda.gov/scripts/cdrh/cfdocs/cfMAUDE/Detail.CFM?MDRFOI__ID=7113305&pc=MTA	2023826-2017-01883	2017-11-08	Injury	STAAR SURGICAL COMPANY	2017-12-13	MTA	IMPLANTABLE COLLAMER LENS (ICL)	Inadequacy of Device Shape and/or Size	Intraocular Pressure Increased; Blurred Vision; No Code Available	P030016	NA	1	Event Description: THE REPORTER INDICATED THAT THE SURGEON IMPLANTED A 13.2MM, -9.5 DIOPTER, IMPLANTABLE COLLAMER LENS ON (B)(6) 2017. THE LENS WAS EXPLANTED ON (B)(6) 2017 DUE TO VAULTING AND INCREASED INTRAOCULAR PRESSURE. A SHORTER LENGTH LENS WAS IMPLANTED. ADDITIONAL INFORMATION HAS BEEN REQUESTED BUT NONE HAS BEEN FORTHCOMING. IF ADDITIONAL INFORMATION IS RECEIVED , A SUPPLEMENTAL MEDWATCH …	Lens Exchange	Unknown
https://www.accessdata.fda.gov/scripts/cdrh/cfdocs/cfMAUDE/Detail.CFM?MDRFOI__ID=7267534&pc=MTA	2023826-2018-00209	2017-12-22	Injury	STAAR SURGICAL COMPANY	2018-02-13	MTA	IMPLANTABLE COLLAMER LENS (ICL)	Inadequacy of Device Shape and/or Size	Intraocular Pressure Increased; Blurred Vision; No Code Available	NA	NA	1	Event Description: THE REPORTER INDICATED THAT THE SURGEON IMPLANTED A 13.2 MM VICMO13.2 IMPLANTABLE COLLAMER LENS, -17.5 DIOPTER, INTO THE PATIENT'S RIGHT EYE (OD) ON (B)(6) 2017. ON (B)(6) 2017 THE LENS WAS EXCHANGED WITH A SMALLER LENS DUE TO EXCESSIVE VAULTING, SIGNIFICANT REDUCTION OF IRIDO-CORNEAL ANGLES (ICA), REFRACTIVE SURPRISE, PIGMENT DISPERSION, AND UNREACTIVE (FIXED) PUPIL. THE PROBL…	Lens Exchange	Resolved
https://www.accessdata.fda.gov/scripts/cdrh/cfdocs/cfMAUDE/Detail.CFM?MDRFOI__ID=7320724&pc=MTA	2023826-2018-00319	2018-01-03	Injury	STAAR SURGICAL COMPANY	2018-03-07	MTA	IMPLANTABLE COLLAMER LENS (ICL)	Inadequacy of Device Shape and/or Size	Intraocular Pressure Increased; Blurred Vision; No Code Available	NA	NA	1	Event Description: THE REPORTER INDICATED THAT THE SURGEON IMPLANTED A 13.2MM VICM5_13.2 IMPLANTABLE COLLAMER LENS, -7.5 DIOPTER, INTO THE PATIENT'S LEFT EYE (OS) ON (B)(6) 2018. REPORTEDLY, ON (B)(6) 2018 THE LENS WAS EXPLANTED DUE TO EXCESSIVE VAULT, ELEVATED IOP, ANGLE CLOSURE, SIGNIFICANT REDUCTION OF IRIDO-CORNEAL ANGLES (ICA), BLURRED VISION, AND IRIS ATROPHY. SURGEON ALSO STATES HE PERFORM…	Lens Exchange + Secondary Operation	Unknown
https://www.accessdata.fda.gov/scripts/cdrh/cfdocs/cfMAUDE/Detail.CFM?MDRFOI__ID=7504918&pc=MTA	2023826-2018-00693	2018-04-19	Injury	STAAR SURGICAL COMPANY	2018-05-10	MTA	IMPLANTABLE COLLAMER LENS (ICL)	Inadequacy of Device Shape and/or Size	Intraocular Pressure Increased; Blurred Vision; No Code Available	P030016	NA	1	Event Description: THE REPORTER INDICATED THAT THE SURGEON IMPLANTED A 13.7 MM MICL13.7, -11.5 DIOPTER, IMPLANTABLE COLLAMER LENS INTO THE PATIENT'S LEFT EYE (OS) ON (B)(6) 2018. ON (B)(6) 2018 THE LENS WAS REMOVED DUE TO OBSERVATION OF EXCESSIVE VAULT WITH BLURRED VISION. THE LENS WAS EXCHANGED FOR A SHORTER LENGTH LENS AND THE PROBLEM WAS RESOLVED. Manufacturer Narrative: CORRECTIONS: ON (B)(6)…	Lens Exchange	Resolved
https://www.accessdata.fda.gov/scripts/cdrh/cfdocs/cfMAUDE/Detail.CFM?MDRFOI__ID=5037267&pc=MTA	2023826-2015-01139	2015-07-22	Injury	STAAR SURGICAL COMPANY	2015-08-27	MTA	ICL (IMPLANTABLE COLLAMER LENS)	Inadequacy of Device Shape and/or Size; Appropriate Term/Code Not Available	Intraocular Pressure Increased; Blurred Vision; No Code Available	P030016	NA	1	Event Description: THE REPORTER INDICATED THE SURGEON IMPLANTED A 13.7MM MICL13.7 IMPLANTABLE COLLAMER LENS, -10.0 DIOPTER, IN THE PATIENT'S LEFT EYE (OS) ON (B)(6) 2015. THE LENS WAS EXPLANTED ON (B)(6) 2015 DUE TO EXCESSIVE VAULTING AND INCREASED ELEVATED INTRAOCULAR PRESSURE (UP TO 56MMHG). MEDICATIONS WERE ADMINISTERED BUT DID NOT HELP AND A YAG OF THE PERIPHERAL IRIDOTOMIES WAS PERFORMED BUT…	Lens Exchange + Secondary Operation	Resolved
https://www.accessdata.fda.gov/scripts/cdrh/cfdocs/cfMAUDE/Detail.CFM?MDRFOI__ID=5731066&pc=MTA	2023826-2016-00819	2016-04-22	Injury	STAAR SURGICAL COMPANY	2016-06-16	MTA	ICL (IMPLANTABLE COLLAMER LENS)	Inadequacy of Device Shape and/or Size; Appropriate Term/Code Not Available	Intraocular Pressure Increased; Blurred Vision; No Code Available	N/A	NA	1	Event Description: THE REPORTER INDICATED THAT THE SURGEON IMPLANTED A 13.2MM VICMO13.2 IMPLANTABLE COLLAMER LENS, -5.50 DIOPTER, IN THE PATIENT'S LEFT EYE (OS) ON (B)(6) 2016. THE LENS WAS EXPLANTED ON (B)(6) 2016 DUE TO EXCESSIVE VAULT, ANGLE CLOSURE (WITH ELEVATED IOP), BLURRED VISION, AND PERMANENTLY DILATED PUPIL._x000D_ Manufacturer Narrative: NO SIMILAR COMPLAINTS WERE REPORTED FOR UNITS W…	Lens Extraction	Unknown
https://www.accessdata.fda.gov/scripts/cdrh/cfdocs/cfMAUDE/Detail.CFM?MDRFOI__ID=5681611&pc=MTA	2023826-2016-00759	NA	Injury	STAAR SURGICAL COMPANY	2016-05-26	MTA	ICL (IMPLANTABLE COLLAMER LENS)	Inadequacy of Device Shape and/or Size; Appropriate Term/Code Not Available	Intraocular Pressure Increased; Blurred Vision; No Code Available	P030016	NA	1	Event Description: THE REPORTER STATED THE SURGEON IMPLANTED A 12.6MM MICL12.6 IMPLANTABLE COLLAMER LENS, -11.5 DIOPTER, IN THE PATIENT'S LEFT EYE (OS) ON (B)(6) 2016. THE LENS WAS EXPLANTED ON (B)(6) 2016 DUE TO EXCESSIVE VAULTING, ELEVATED INTRAOCULAR PRESSURE, NARROWING OF THE ANGLE, ANGLE CLOSURE AND SHALLOWING OF THE ANTERIOR CHAMBER . THE PATIENT EXPERIENCED BLURRY VISION. THE LENS WAS EXCH…	Lens Exchange	Resolved
https://www.accessdata.fda.gov/scripts/cdrh/cfdocs/cfMAUDE/Detail.CFM?MDRFOI__ID=5923610&pc=MTA	2023826-2016-01211	2016-08-01	Injury	STAAR SURGICAL COMPANY	2016-09-01	MTA	ICL (IMPLANTABLE COLLAMER LENS)	Inadequacy of Device Shape and/or Size; Unintended Movement; Appropriate Term/Code Not Available	Intraocular Pressure Increased; Blurred Vision; No Code Available	NA	NA	1	Event Description: THE REPORTER INDICATED THE SURGEON IMPLANTED A 13.2MM VICMO13.2 IMPLANTABLE COLLAMER LENS, -07.5 DIOPTER, IN THE PATIENT'S LEFT EYE (OS) ON (B)(6) 2016. THE LENS WAS EXPLANTED ON (B)(6) 2016 DUE TO LOW VAULTING, ELEVATED INTRAOCULAR PRESSURE AND REFRACTIVE SURPRISE. THE LENS WAS IMPLANTED UPSIDE DOWN. THE LENS WAS EXCHANGED FOR ANOTHER SAME MODEL/DIOPTER LENS AND THE PROBLEM WA…	Lens Exchange	Resolved
https://www.accessdata.fda.gov/scripts/cdrh/cfdocs/cfMAUDE/Detail.CFM?MDRFOI__ID=9417003&pc=MTA	2023826-2019-02307	2018-07-05	Injury	STAAR SURGICAL COMPANY	2019-12-05	MTA	IMPLANTABLE COLLAMER LENS (ICL)	Misfocusing	Intraocular Pressure Increased; Blurred Vision; No Code Available	N/A	NA	1	Event Description: THE REPORTER INDICATED THAT THE SURGEON IMPLANTED A 13.2MM VICM5_13.2, -11.0 DIOPTER, IMPLANTABLE COLLAMER LENS INTO THE PATIENT'S LEFT EYE (OS) ON (B)(6) 2019. BLURRED VISION AND CONSTANT VERTICAL BLACK LINE WAS OBSERVED. LENS REMAINS IMPLANTED. REPORTEDLY "BLURRING OF VISION SINCE SURGERY ((B)(6) 2018) AND A CONSTANT VERTICAL BLACK ONE WAS SEEN." PER REPORTER ON (B)(6) 2019, …	Lens Retention	Unknown
https://www.accessdata.fda.gov/scripts/cdrh/cfdocs/cfMAUDE/Detail.CFM?MDRFOI__ID=8242379&pc=MTA	2023826-2019-00102	2018-12-07	Injury	STAAR SURGICAL COMPANY	2019-01-11	MTA	IMPLANTABLE COLLAMER LENS (ICL)	Misfocusing; Inadequacy of Device Shape and/or Size	Intraocular Pressure Increased; Blurred Vision; No Code Available	P030016	NA	1	Event Description: THE REPORTER INDICATED THAT THE SURGEON IMPLANTED A 13.7MM, MICL13.7, -14.0 DIOPTER, IMPLANTABLE COLLMER LENS INTO THE PATIENTS LEFT EYE (OS) ON (B)(6) 2018. THE LENS WAS LATER REMOVED AND REPLACED WITH A SHORTER LENGTH LENS DUE TO EXCESSIVE VAULT, PUPIL BLOCK, ANGLE CLOSURE, INTRAOCULAR PRESSURE, AND BLURRED VISION. IT WAS REPORTED THAT THE REPLACEMENT LENS RESOLVED THE PROBLE…	Lens Exchange	Resolved
https://www.accessdata.fda.gov/scripts/cdrh/cfdocs/cfMAUDE/Detail.CFM?MDRFOI__ID=8242395&pc=MTA	2023826-2019-00101	2018-12-07	Injury	STAAR SURGICAL COMPANY	2019-01-11	MTA	IMPLANTABLE COLLAMER LENS (ICL)	Misfocusing; Inadequacy of Device Shape and/or Size	Intraocular Pressure Increased; Blurred Vision; No Code Available	P030016	NA	1	Event Description: THE REPORTER INDICATED THAT THE SURGEON IMPLANTED A 13.7MM, MICL13.7, -15.0 DIOPTER, IMPLANTABLE COLLMER LENS INTO THE PATIENTS RIGHT EYE (OD) ON (B)(6) 2018. THE LENS WAS LATER REMOVED AND REPLACED WITH A SHORTER LENGTH LENS DUE TO EXCESSIVE VAULT, PUPIL BLOCK, ANGLE CLOSURE, INTRAOCULAR PRESSURE, AND BLURRED VISION. IT WAS REPORTED THAT THE REPLACEMENT LENS RESOLVED THE PROBL…	Lens Exchange	Resolved
https://www.accessdata.fda.gov/scripts/cdrh/cfdocs/cfMAUDE/Detail.CFM?MDRFOI__ID=8269193&pc=MTA	2023826-2019-00142	2019-01-11	Injury	STAAR SURGICAL COMPANY	2019-01-22	MTA	IMPLANTABLE COLLAMER LENS (ICL)	Misfocusing; Inadequacy of Device Shape and/or Size	Intraocular Pressure Increased; Blurred Vision; No Code Available	P030016	NA	1	Event Description: THE REPORTER INDICATED THE SURGEON IMPLANTED A 13.7MM MICL13.7 IMPLANTABLE COLLAMER LENS, -10.0 DIOPTER, IN THE PATIENTS LEFT EYE (OS) ON (B)(6) 2019. THE LENS WAS EXPLANTED ON (B)(6) 2019 DUE TO EXCESSIVE VAULTING, LOSS OF BEST CORRRECTED VISUAL ACUITY (BCVA), ELEVATED INTRAOCULAR PRESSURE AND BLURRED VISION. THE LENS WAS EXCHANGED FOR A SHORTER LENS AND THE PROBLEM WAS RESOLV…	Lens Exchange	Resolved
https://www.accessdata.fda.gov/scripts/cdrh/cfdocs/cfMAUDE/Detail.CFM?MDRFOI__ID=10002877&pc=MTA	2023826-2020-00983	2019-08-01	Injury	STAAR SURGICAL COMPANY	2020-04-27	MTA	IMPLANTABLE COLLAMER LENS (ICL)	Misfocusing; Off-Label Use; Inadequacy of Device Shape and/or Size	Intraocular Pressure Increased; Blurred Vision; No Code Available	N/A	NA	1	Event Description: THE REPORTER INDICATED THAT THE SURGEON IMPLANTED A 12.6MM VICM5_12.6 IMPLANTABLE COLLAMER LENS, -8.0 DIOPTER INTO THE PATIENT'S RIGHT EYE (OD) ON (B)(6) 2019. ON THE SAME DATE IN A SECOND SURGERY, THE LENS WAS EXCHANGED WITH A SHORTER LENS DUE TO EXCESSIVE VAULT, ELEVATED IOP, AND BLURRED VISION. THE PROBLEM WAS RESOLVED. Manufacturer Narrative: ADDITIONAL INFORMATION: H3- DEV…	Lens Exchange	Resolved
https://www.accessdata.fda.gov/scripts/cdrh/cfdocs/cfMAUDE/Detail.CFM?MDRFOI__ID=8774163&pc=MTA	2023826-2019-01188	2019-06-10	Injury	STAAR SURGICAL COMPANY	2019-07-09	MTA	IMPLANTABLE COLLAMER LENS (ICL)	Misfocusing; Off-Label Use; Inadequacy of Device Shape and/or Size; Device Dislodged or Dislocated	Intraocular Pressure Increased; Blurred Vision; No Code Available	N/A	NA	1	Event Description: THE REPORTER INDICATED THAT THE SURGEON IMPLANTED A 13.2MM VICM5_13.2 IMPLANTABLE COLLAMER LENS, -7.5 DIOPTER INTO THE PATIENT'S RIGHT EYE (OD) ON (B)(6) 2019. THE SURGEON REPORTS EXCESSIVE VAULT, LOSS OF BCVA, PUPIL BLOCK, ELEVATED IOP, "FLAT CAMERA," AND ANGLE CLOSURE. ELEVATED IOP WAS TREATED WITH "MEDICAL DROPS" AND PAIN PILLS. THE LENS CURRENTLY REMAINS IMPLANTED. Manufact…	Lens Retention	Unknown
https://www.accessdata.fda.gov/scripts/cdrh/cfdocs/cfMAUDE/Detail.CFM?MDRFOI__ID=9794960&pc=MTA	2023826-2020-00430	2019-12-26	Injury	STAAR SURGICAL COMPANY	2020-03-05	MTA	IMPLANTABLE COLLAMER LENS (ICL)	Off-Label Use; Inadequacy of Device Shape and/or Size	Intraocular Pressure Increased; Blurred Vision; No Code Available	N/A	NA	1	Event Description: THE REPORTER INDICATED THAT A 12.6MM, VICM5_12.6, -12.50 DIOPTER, IMPLANTABLE COLLAMER LENS WAS IMPLANTED INTO THE PATIENTS RIGHT EYE (OD) ON (B)(6) 2019. ON (B)(6) 2019 THE LENS WAS EXCHANGED FOR A SHORTER LENGTH LENS DUE TO EXCESSIVE VAULT, ELEVATED INTRAOCULAR PRESSURE (IOP) AND BLURRED VISION. THIS EXCHANGE RESOLVED THE PROBLEM. Manufacturer Narrative: ADDITIONAL INFORMATIO…	Lens Exchange	Resolved
https://www.accessdata.fda.gov/scripts/cdrh/cfdocs/cfMAUDE/Detail.CFM?MDRFOI__ID=13998035&pc=MTA	2023826-2022-00825	NA	Injury	STAAR SURGICAL COMPANY	2022-04-04 04:00:00	MTA	IMPLANTABLE COLLAMER LENS (ICL)	Misfocusing; Off-Label Use; Inadequacy of Device Shape and/or Size; Optical Problem	Intraocular Pressure Increased; Blurred Vision; Visual Disturbances; Appropriate Clinical Signs, Symptoms, Conditions Term / Code Not Available	NA	NA	1	Event Description: THE REPORTER INDICATED THAT A 13.7MM VICM5_13.7 IMPLANTABLE COLLAMER LENS OF -13.5 DIOPTER WAS IMPLANTED INTO THE PATIENT'S LEFT EYE (OS) ON (B)(6) 2022. EXESSIVE VAULT, ELEVATED IOP, BLURRED VISION, GLARE/HALOES, UNREACTIVE (FIXED) PUPIL OF 5MM, AND SHALLOW ANTERIOR CHAMBER WERE REPORTED. ON (B)(6) 2022 THE LENS WAS EXPLANTED. ON (B)(6) 2022 A SHORTER LENGTH LENS WAS IMPLANTED…	Lens Exchange	Unknown
https://www.accessdata.fda.gov/scripts/cdrh/cfdocs/cfMAUDE/Detail.CFM?MDRFOI__ID=11416096&pc=MTA	2023826-2021-00507	2021-02-09	Injury	STAAR SURGICAL COMPANY	2021-03-04	MTA	IMPLANTABLE COLLAMER LENS (ICL)	Misfocusing; Inadequacy of Device Shape and/or Size; Patient-Device Incompatibility; Optical Problem	Intraocular Pressure Increased; Blurred Vision; Visual Disturbances; Halo; Appropriate Clinical Signs, Symptoms, Conditions Term / Code Not Available	P030016	NA	1	Event Description: THE REPORTER INDICATED THAT A 12.6MM, MICL12.6, -9.0 DIOPTER, IMPLANTABLE COLLAMER LENS WAS IMPLANTED INTO THE PATIENT'S LEFT EYE (OS) ON (B)(6) 2021. SIGNIFICANT REDUCTION OF IRIDO-CORNEAL ANGELS, BLURRED VISION, GLARE/HALOES, AND EXCESSIVE VAULT WERE OBSERVED, THE LENS WAS EXCHANGED FOR A SHORTER LENGTH LENS ON (B)(6) 2021 AND THE PROBLEM WAS RESOLVED. CAUSE OF THE EVENT IS R…	Lens Exchange	Resolved
https://www.accessdata.fda.gov/scripts/cdrh/cfdocs/cfMAUDE/Detail.CFM?MDRFOI__ID=6440682&pc=MTA	2023826-2017-00502	2016-12-15	Injury	STAAR SURGICAL COMPANY	2017-03-28	MTA	IMPLANTABLE COLLAMER LENS (ICL)	Inadequacy of Device Shape and/or Size	Intraocular Pressure Increased; Blurred Vision; Visual Disturbances; Halo; No Code Available	NA	NA	1	Event Description: THE REPORTER INDICATED THAT THE SURGEON IMPLANTED A 12.6MM VICMO12.6 IMPLANTABLE COLLAMER LENS, -18.00 DIOPTER, INTO THE PATIENT'S LEFT EYE (OS) ON (B)(6) 2016. ON (B)(6) 2016, THE LENS WAS EXPLANTED DUE TO EXCESSIVE VAULT, ELEVATED IOP, SIGNIFICANT REDUCTION OF ICA, REFRACTIVE SURPRISE, LOSS OF BCVA, PIGMENT DISPERSION, UNREACTIVE PUPIL (FIXED), GLARE/HALOES, BLURRED VISION, A…	Lens Exchange	Resolved
https://www.accessdata.fda.gov/scripts/cdrh/cfdocs/cfMAUDE/Detail.CFM?MDRFOI__ID=6802597&pc=MTA	2023826-2017-01349	2017-07-07	Injury	STAAR SURGICAL COMPANY	2017-08-17	MTA	IMPLANTABLE COLLAMER LENS (ICL)	Inadequacy of Device Shape and/or Size	Intraocular Pressure Increased; Blurred Vision; Visual Disturbances; Halo; No Code Available	N/A	NA	1	Event Description: THE REPORTER INDICATED THAT THE SURGEON IMPLANTED A 13.2MM VICMO13.2 IMPLANTABLE COLLAMER LENS, -6.00 DIOPTER, INTO THE PATIENT'S RIGHT EYE (OD) ON (B)(6) 2017. AFTER IMPLANTATION, PATIENT EXPERIENCED EXCESSIVE VAULT, ANGLE CLOSURE WITH ELEVATED IOP, GLARE/HALOS, AND BLURRED VISION. A LENS EXCHANGE HAS BEEN PLANNED BUT NOT PERFORMED. Manufacturer Narrative: THIS PRODUCT IS NOT …	Lens Retention	Unknown
https://www.accessdata.fda.gov/scripts/cdrh/cfdocs/cfMAUDE/Detail.CFM?MDRFOI__ID=6546105&pc=MTA	2023826-2017-00768	2017-01-09	Injury	STAAR SURGICAL COMPANY	2017-05-04	MTA	ICL (IMPLANTABLE COLLAMER LENS)	Inadequacy of Device Shape and/or Size; Device Operates Differently Than Expected	Intraocular Pressure Increased; Blurred Vision; Visual Disturbances; Halo; No Code Available	N/A	NA	1	Event Description: THE REPORTER INDICATED THAT THE SURGEON IMPLANTED AN EVO+ COLLAMER LENS IN THE PATIENT'S LEFT EYE (OS). THE PATIENT EXPERIENCED A VISIBLE DISTORTION TO THE IRIS. NO FURTHER INFORMATION HAS BEEN PROVIDED. AT THE DATE OF MDR SUBMISSION, MULTIPLE ATTEMPTS TO CONTACT REPORTER HAVE BEEN UNSUCCESSFUL. Manufacturer Narrative: ADDITIONAL INFORMATION: THE REPORTER INDICATED THAT THE SUR…	Lens Retention	Unknown
https://www.accessdata.fda.gov/scripts/cdrh/cfdocs/cfMAUDE/Detail.CFM?MDRFOI__ID=9746415&pc=MTA	2023826-2020-00379	2019-11-25	Injury	STAAR SURGICAL COMPANY	2020-02-24	MTA	IMPLANTABLE COLLAMER LENS (ICL)	Inadequacy of Device Shape and/or Size	Intraocular Pressure Increased; Blurred Vision; Visual Disturbances; No Code Available	N/A	NA	1	Event Description: THE REPORTER INDICATED THAT A 13.2MM, VICM5_13.2, -9.00 DIOPTER, IMPLANTABLE COLLAMER LENS WAS IMPLANTED INTO THE PATIENTS LEFT EYE (OS) ON (B)(6) 2019. ON (B)(6) 2019 THE LENS WAS EXCHANGED FOR A LONGER LENGTH LENS DUE TO LOW VAULT, ELEVATED IOP, GLARE/HALOES AND BLURRED VISION. THIS EXCHANGE RESOLVED THE PROBLEM. Manufacturer Narrative: ADDITIONAL INFORMATION: H3-DEVICE EVALU…	Lens Exchange	Resolved
https://www.accessdata.fda.gov/scripts/cdrh/cfdocs/cfMAUDE/Detail.CFM?MDRFOI__ID=12322382&pc=MTA	2023826-2021-03131	2021-07-12	Injury	STAAR SURGICAL COMPANY	2021-08-15	MTA	IMPLANTABLE COLLAMER LENS	Inadequacy of Device Shape and/or Size	Intraocular Pressure Increased; Discomfort; Appropriate Clinical Signs, Symptoms, Conditions Term / Code Not Available	NA	NA	1	Event Description: THE REPORTER INDICATED THAT A 13.2MM VICM5_13.2 IMPLANTABLE COLLAMER LENS, -12.5 DIOPTER WAS IMPLANTED INTO THE PATIENT'S RIGHT EYE (OD) ON (B)(6) 2021. ON (B)(6) 2021 THE LENS WAS EXPLANTED DUE TO EXCESSIVE VAULT, UNREACTIVE (FIXED) PUPIL, ELEVATED IOP, AND DISCOMFORT. AFTER EXPLANT THE PUPIL AND IOP ARE BACK TO NORMAL. Manufacturer Narrative: DEVICE EVALUATION: THE LENS WAS R…	Lens Extraction	Resolved
https://www.accessdata.fda.gov/scripts/cdrh/cfdocs/cfMAUDE/Detail.CFM?MDRFOI__ID=4625074&pc=MTA	2023826-2015-00385	NA	Injury	STAAR SURGICAL COMPANY	2015-03-23	MTA	ICL (IMPLANTABLE COLLAMER LENS)	Inadequacy of Device Shape and/or Size; Appropriate Term/Code Not Available	Intraocular Pressure Increased; Discomfort; No Code Available	UNK	NA	1	Event Description: THE REPORTER INDICATED THE SURGEON IMPLANTED A 13.7MM MICL13.7 IMPLANTABLE COLLAMER LENS IN THE PATIENT'S LEFT EYE (OS) IN (B)(6), 2014. THE REPORTER INDICATED THE SIZE OF THE LENS WAS TOO BIG AND THE ANTERIOR CHAMBER WAS SHALLOW. THE INTRAOCULAR PRESSURE WAS A PROBLEM AND A 2ND PERIPHERAL IRIDECTOMY WAS PERFORMED. THE PATIENT EXPERIENCED SOME DISCOMFORT. THE LENS WILL BE EXPLA…	Lens Exchange	Unknown
https://www.accessdata.fda.gov/scripts/cdrh/cfdocs/cfMAUDE/Detail.CFM?MDRFOI__ID=18288508&pc=MTA	2023826-2023-05482	2023-11-21	Malfunction	STAAR SURGICAL COMPANY	2023-12-07	MTA	IMPLANTABLE COLLAMER LENS (ICL)	Optical Problem	Intraocular Pressure Increased; Halo	P030016	NA	1	Event Description: THE REPORTER INDICATED THAT A 13.7MM VICM513.7 IMPLANTABLE COLLAMER LENS OF -4.5 DIOPTER WAS IMPLANTED INTO THE PATIENT'S RIGHT EYE (OD) ON (B)(6) 2023. PUPIL BLOCK WITH ELEVATED IOP AND GLARES/HALOES ARE OBSERVED. CAUSE OF THE EVENT IS UNKNOWN. Manufacturer Narrative: A4-A6:UNK H6: WORK ORDER SEARCH: NO SIMILAR COMPLAINTS WITHIN ASSOCIATED LOTS WERE FOUND. (B)(4)	Unknown	Unknown
https://www.accessdata.fda.gov/scripts/cdrh/cfdocs/cfMAUDE/Detail.CFM?MDRFOI__ID=10816077&pc=MTA	2023826-2020-02662	2020-04-07	Injury	STAAR SURGICAL COMPANY	2020-11-10	MTA	IMPLANTABLE COLLAMER LENS (ICL)	Adverse Event Without Identified Device or Use Problem; Optical Problem	Intraocular Pressure Increased; Halo; Appropriate Clinical Signs, Symptoms, Conditions Term / Code Not Available	P030016	NA	1	Event Description: THE REPORTER INDICATED THE SURGEON IMPLANTED A 12.6MM MICL12.6 IMPLANTABLE COLLAMER LENS, -12.0 DIOPTER, IN THE PATIENTS LEFT EYE (OS) ON 06-APR-2020. AT ONE DAY POST-OP, THE VAULT AND VISION WAS IMPROVED BUT WITH MYDRIASIS AND HALOS. THE PATIENTS INTRAOCULAR PRESSURE WAS ELEVATED BUT WAS TREATED AGGRESSIVELY WITH DIAMOX AND TOPICAL DROPS. THIS WAS THE REPLACEMENT LENS FOR MFR.…	Lens Retention	Unknown
https://www.accessdata.fda.gov/scripts/cdrh/cfdocs/cfMAUDE/Detail.CFM?MDRFOI__ID=10515451&pc=MTA	2023826-2020-02022	NA	Injury	STAAR SURGICAL COMPANY	2020-09-10 04:00:00	MTA	IMPLANTABLE COLLAMER LENS (ICL)	Adverse Event Without Identified Device or Use Problem; Optical Problem; No Apparent Adverse Event	Intraocular Pressure Increased; Halo; Appropriate Clinical Signs, Symptoms, Conditions Term / Code Not Available	N/A	NA	1	Event Description: THE REPORTER INDICATED THAT A IMPLANTABLE COLLAMER LENS WAS IMPLANTED INTO THE PATIENT'S EYE. PRESSURE SPIKES WERE OBSERVED. LENS REMAINS IMPLANTED. ADDITIONAL INFORMATION HAS BEEN REQUESTED BUT NONE HAS BEEN FORTHCOMING. IF ADDITIONAL INFORMATION IS RECEIVED A SUPPLEMENTAL MEDWATCH REPORT WILL BE SUBMITTED. Manufacturer Narrative: ADDITIONA INFORMATION: B5- THE REPORTER INDICA…	Lens Retention + Secondary Operation	Unknown
https://www.accessdata.fda.gov/scripts/cdrh/cfdocs/cfMAUDE/Detail.CFM?MDRFOI__ID=11795155&pc=MTA	2023826-2021-01396	NA	Injury	STAAR SURGICAL COMPANY	2021-05-07 04:00:00	MTA	IMPLANTABLE COLLAMER LENS (ICL)	Optical Problem	Intraocular Pressure Increased; Halo; Appropriate Clinical Signs, Symptoms, Conditions Term / Code Not Available	NA	NA	1	Event Description: IT WAS REPORTED THAT A 12.6MM, VICMO12.6, -18.00 DIOPTER, IMPLANTABLE COLLAMER LENS WAS IMPLANTED INTO THE PATIENT RIGHT EYE (OD) AS A REPLACEMENT LENS DUE TO EXCESSIVE VAULT AND SIGNIFICANT REDUCTION OF ICA BUT IT DID NOT RESOLVE THE PROBLEM. FOR STATUS OF THE EYE " PRESENCE OF HALOS; UNREACTIVE PUPIL" WAS REPORTED. " DOCTOR BELIEVES THAT HIGH IOP, MAY BE DUE TO CORTICOSTEROID…	Unknown	Unknown
https://www.accessdata.fda.gov/scripts/cdrh/cfdocs/cfMAUDE/Detail.CFM?MDRFOI__ID=5955095&pc=MTA	2023826-2016-01266	2016-03-25	Injury	STAAR SURGICAL COMPANY AG	2016-09-15	MTA	ICL (IMPLANTABLE COLLAMER LENS)	Device Operates Differently Than Expected; Appropriate Term/Code Not Available	Intraocular Pressure Increased; Halo; No Code Available	P030016	NA	1	Event Description: THE REPORTER INDICATED THE SURGEON IMPLANTED A 12.0MM ICM120V4 IMPLANTABLE COLLAMER LENS, -13.50 DIOPTER, IN THE PATIENT'S RIGHT EYE (OD) ON (B)(6) 2011. THE LENS WAS EXPLANTED ON (B)(6) 2016 DUE TO ELEVATED INTRAOCULAR PRESSURE, GLARE AND HALOS. THE PATIENT'S POST-OP BEST-CORRECTED VISUAL ACUITY WAS 20/20._x000D_ Manufacturer Narrative: DEVICE EVALUATION: THE LENS WAS RETURNED…	Lens Extraction	Resolved
https://www.accessdata.fda.gov/scripts/cdrh/cfdocs/cfMAUDE/Detail.CFM?MDRFOI__ID=5955096&pc=MTA	2023826-2016-01267	2016-03-25	Injury	STAAR SURGICAL COMPANY AG	2016-09-15	MTA	ICL (IMPLANTABLE COLLAMER LENS)	Device Operates Differently Than Expected; Appropriate Term/Code Not Available	Intraocular Pressure Increased; Halo; No Code Available	P030016	NA	1	Event Description: THE REPORTER INDICATED THE SURGEON IMPLANTED A 12.0MM ICM120V4 IMPLANTABLE COLLAMER LENS, -14.50 DIOPTER, IN THE PATIENT'S LEFT EYE (OS) ON (B)(6) 2011. THE LENS WAS EXPLANTED ON (B)(6) 2016 DUE TO ELEVATED INTRAOCULAR PRESSURE, GLARE AND HALOS. THE PATIENT'S POST-OP BEST-CORRECTED VISUAL ACUITY WAS 20/20._x000D_ Manufacturer Narrative: THE LENS WAS RETURNED DRY IN A LENS CASE/…	Lens Extraction	Resolved
https://www.accessdata.fda.gov/scripts/cdrh/cfdocs/cfMAUDE/Detail.CFM?MDRFOI__ID=6028643&pc=MTA	2023826-2016-01460	2016-02-06	Injury	STAAR SURGICAL COMPANY	2016-10-13	MTA	ICL (IMPLANTABLE COLLAMER LENS)	Inadequacy of Device Shape and/or Size	Intraocular Pressure Increased; Halo; No Code Available	NA	NA	1	Event Description: THE REPORTER INDICATED THAT THE SURGEON INSERTED A 12.6 MM VICMO12.6 IMPLANTABLE COLLAMER LENS, -11.00 DIOPTER, IN THE PATIENT'S LEFT EYE ON (B)(6) 2016. THE LENS WAS EXPLANTED ON (B)(6) 2016 DUE TO EXCESSIVE VAULTING, ELEVATED INTRAOCULAR PRESSURE, AND GLARES/HALOES. THE LENS WAS EXCHANGED FOR A SHORTER LENS AND THE PROBLEM WAS RESOLVED._x000D_ Manufacturer Narrative: DEVICE E…	Lens Exchange	Resolved
https://www.accessdata.fda.gov/scripts/cdrh/cfdocs/cfMAUDE/Detail.CFM?MDRFOI__ID=6028650&pc=MTA	2023826-2016-01459	2016-02-06	Injury	STAAR SURGICAL COMPANY	2016-10-13	MTA	ICL (IMPLANTABLE COLLAMER LENS)	Inadequacy of Device Shape and/or Size	Intraocular Pressure Increased; Halo; No Code Available	NA	NA	1	Event Description: THE REPORTER INDICATED THAT THE SURGEON INSERTED A 12.6 MM VICMO12.6 IMPLANTABLE COLLAMER LENS, -10.50 DIOPTER, IN THE PATIENT'S RIGHT EYE ON (B)(6) 2016. THE LENS WAS EXPLANTED ON (B)(6) 2016 DUE TO EXCESSIVE VAULTING, ELEVATED INTRAOCULAR PRESSURE, AND GLARES/HALOES. THE LENS WAS EXCHANGED FOR A SHORTER LENS AND THE PROBLEM WAS RESOLVED. Manufacturer Narrative: DEVICE EVALUAT…	Lens Exchange	Resolved
https://www.accessdata.fda.gov/scripts/cdrh/cfdocs/cfMAUDE/Detail.CFM?MDRFOI__ID=6200082&pc=MTA	2023826-2016-01824	2016-10-13	Injury	STAAR SURGICAL COMPANY	2016-12-22	MTA	IMPLANTABLE COLLAMER LENS (ICL)	Inadequacy of Device Shape and/or Size	Intraocular Pressure Increased; Halo; No Code Available	NA	NA	1	Event Description: THE REPORTER INDICATED THAT THE SURGEON IMPLANTED A 13.2MM VTICMO13.2 IMPLANTABLE COLLAMER LENS, -17.00 DIOPTER, IN THE PATIENT'S LEFT EYE (OS) ON (B)(6) 2016. THE PATIENT EXPERIENCED EXCESSIVE VAULTING, SIGNIFICANT REDUCTION OF IRIDO-CORNEAL ANGLES, GLARE/HALOES, AND ANGLE CLOSURE WITH ELEVATED IOP. AS OF THE DATE OF MDR FILING, THE LENS HAS NOT YET BEEN EXPLANTED AND REMAINS …	Lens Retention	Unknown
https://www.accessdata.fda.gov/scripts/cdrh/cfdocs/cfMAUDE/Detail.CFM?MDRFOI__ID=9988375&pc=MTA	2023826-2020-00945	2020-03-26	Injury	STAAR SURGICAL COMPANY	2020-04-22	MTA	IMPLANTABLE COLLAMER LENS (ICL)	Inadequacy of Device Shape and/or Size; Optical Problem	Intraocular Pressure Increased; Halo; No Code Available	P030016	NA	1	Event Description: THE REPORTER INDICATED THE SURGEON IMPLANTED A 13.2MM MICL13.2 IMPLANTABLE COLLAMER LENS, -12.0 DIOPTER, IN THE PATIENTS LEFT EYE (OS) ON (B)(6) 2020. THE LENS WAS EXPLANTED ON (B)(6) 2020 DUE TO EXCESSIVE VAULTING AND SIGNIFICANT REDUCTION OF IRIDO-CORNEAL ANGLES. THE SURGEON HAD PERFORMED A LIMBAL RELAXING INCISION BUT IT WAS LEAKING SO THE SURGEON SUTURED THE INCISION CLOSED…	Lens Exchange	Resolved
https://www.accessdata.fda.gov/scripts/cdrh/cfdocs/cfMAUDE/Detail.CFM?MDRFOI__ID=5572295&pc=MTA	2023826-2016-00437	2015-10-20	Injury	STAAR SURGICAL COMPANY	2016-04-12	MTA	ICL (IMPLANTABLE COLLAMER LENS)	Unintended Movement	Intraocular Pressure Increased; Halo; No Code Available	NA	NA	1	Event Description: THE REPORTER INDICATED THE SURGEON IMPLANTED A 12.6MM VICMO12.6 IMPLANTABLE COLLAMER LENS, -17.50 DIOPTER, IN THE PATIENT'S LEFT EYE (OS). THE REPORTER INDICATED THE LENS DISLOCATED/SUBLUXED, WITH THE PATIENT EXPERIENCING ELEVATED INTRAOCULAR PRESSURE AND GLARES/HALOS. THE PATIENT COULD SEE A CRESCENT SHAPE ON THE RIGHT SIDE OF THEIR VISUAL FIELD, WHICH, WITH REFLECTION OF LIGH…	Lens Retention	Unknown
https://www.accessdata.fda.gov/scripts/cdrh/cfdocs/cfMAUDE/Detail.CFM?MDRFOI__ID=7404316&pc=MTA	2023826-2018-00506	2018-02-08	Injury	STAAR SURGICAL COMPANY	2018-04-06	MTA	IMPLANTABLE COLLAMER LENS (ICL)	Device Operates Differently Than Expected	Intraocular Pressure Increased; Iritis; No Code Available	P030016	NA	1	Event Description: THE SURGEON INDICATED THAT HE IMPLANTED A 12.6MM MICL12.6, -8.5 DIOPTER, IMPLANTABLE COLLAMER LENS IN THE PATIENT'S LEFT EYE (OS) ON (B)(6) 2018. ON (B)(6) 2018 IRITIS WAS OBSERVED. THE LENS WAS EXPLANTED ON (B)(6) 2018 DUE TO PERSISTENT IRITIS AND HIGH IOP (INTRAOCULAR PRESSURE). THE SURGEON REPORTED TO USE COMBIGAN, DUREZOL, PRED FORTE, AND LOTEMAX OVER THE COURSE OF TREATMEN…	Lens Extraction + Secondary Operation	Resolved
https://www.accessdata.fda.gov/scripts/cdrh/cfdocs/cfMAUDE/Detail.CFM?MDRFOI__ID=7631046&pc=MTA	2023826-2018-00931	2018-02-28	Injury	STAAR SURGICAL COMPANY	2018-06-22	MTA	IMPLANTABLE COLLAMER LENS (ICL)	Inadequacy of Device Shape and/or Size; Device Dislodged or Dislocated	Intraocular Pressure Increased; Iritis; Visual Disturbances; Halo; No Code Available	P030016	NA	1	Event Description: THE REPORTER INDICATED THAT THE SURGEON IMPLANTED A 13.2 MM MICL13.2, -12.5 DIOPTER, IMPLANTABLE COLLAMER LENS INTO THE PATIENT'S LEFTT EYE (OS) ON (B)(6) 2018. ON (B)(6) /2018 THE LENS WAS REMOVED DUE TO OBSERVATION OF EXCESSIVE VAULT, ELEVATED IOP (INTRAOCULAR PRESSURE), SIGNIFICANT REDUCTION OF IRIDO-CORNEAL ANGLES, ANGLE CLOSURE, PIGMENT DISPERSION, UNREACTIVE (FIXED) PUPIL…	Lens Extraction + Secondary Operation	Resolved
https://www.accessdata.fda.gov/scripts/cdrh/cfdocs/cfMAUDE/Detail.CFM?MDRFOI__ID=5458648&pc=MTA	2023826-2016-00197	NA	Injury	STAAR SURGICAL COMPANY	2016-02-24	MTA	ICL (IMPLANTABLE COLLAMER LENS)	Appropriate Term/Code Not Available	Intraocular Pressure Increased; Loss of Vision; Discomfort; No Code Available	P030016	NA	1	Event Description: THE REPORTER STATED THE SURGEON IMPLANTED AN MICL IMPLANTABLE COLLAMER LENS IN THE PATIENT'S EYE. AT THE SAME DAY OF SURGERY AND ONE DAY POST-OP THE PATIENT WAS DOING WELL AND VA WAS 20/15. THE PATIENT TRAVELLED OUT OF STATE THAT SAME WEEK OF SURGERY AND REPORTED A SLIGHT DECLINE IN VISION AND DISCOMFORT TO THE EYE. THE PATIENT WAS PRESCRIBED A STEROID AND PRESSURE DROP. THE PA…	Lens Extraction + Secondary Operation	Unknown
https://www.accessdata.fda.gov/scripts/cdrh/cfdocs/cfMAUDE/Detail.CFM?MDRFOI__ID=7875111&pc=MTA	2023826-2018-01395	2018-08-15	Injury	STAAR SURGICAL COMPANY	2018-09-13	MTA	IMPLANTABLE COLLAMER LENS (ICL)	Inadequacy of Device Shape and/or Size	Intraocular Pressure Increased; Missing Value Reason	MTA	NA	1	Event Description: THE REPORTER INDICATED THAT THE SURGEON IMPLANTED A 13.2MM, MICL13.2, -14.0 DIOPTER, IMPLANTABLE COLLAMER LENS INTO THE PATIENTS RIGHT EYE (OD) ON (B)(6) 2018. THE LENS WAS EXCHANGED ON (B)(6) 2018 WITH A SHORTER LENGTH LENS DUE TO PUPIL BLOCK WITH ELEVATED IOP (INTRAOCULAR PRESSURE), TOO LARGE LENS WITH AC SHALLOWING, HIGH VAULTING AND NARROWING OF ANGLE. THIS EXCHANGE RESOLVE…	Lens Exchange	Resolved
https://www.accessdata.fda.gov/scripts/cdrh/cfdocs/cfMAUDE/Detail.CFM?MDRFOI__ID=12005327&pc=MTA	2023826-2021-01927	2021-05-16	Injury	STAAR SURGICAL COMPANY	2021-06-15	MTA	IMPLANTABLE COLLAMER LENS (ICL)	Off-Label Use; Adverse Event Without Identified Device or Use Problem	Intraocular Pressure Increased; Nausea; Pain; Appropriate Clinical Signs, Symptoms, Conditions Term / Code Not Available	P030016	NA	1	Event Description: THE REPORTER INDICATED THE SURGEON IMPLANTED A 13.2MM MICL13.2 IMPLANTABLE COLLAMER LENS, -10.00 DIOPTER, IN THE PATIENTS LEFT EYE (OS) ON (B)(6) 2021. THE LENS WAS EXPLANTED ON (B)(6) 2021 DUE TO ANGLE CLOSURE AND ELEVATED INTRAOCULAR PRESSURE (IOP). THE SURGEON ENLARGED THE PIS. THE PATIENT COMPLAINED OF EYE PAIN AND NAUSEA. ANOTHER LENS WAS NOT IMPLANTED. PATIENT WAS TAKING …	Lens Extraction + Secondary Operation	Unknown
https://www.accessdata.fda.gov/scripts/cdrh/cfdocs/cfMAUDE/Detail.CFM?MDRFOI__ID=6832459&pc=MTA	2023826-2017-01382	2017-08-02	Injury	STAAR SURGICAL COMPANY	2017-08-30	MTA	IMPLANTABLE COLLAMER LENS (ICL)	Inadequacy of Device Shape and/or Size; Device Operates Differently Than Expected	Intraocular Pressure Increased; Nausea; Pain; No Code Available	P030016	NA	1	Event Description: THE REPORTER STATED THE SURGEON IMPLANTED A 13.7MM MICL13.7 IMPLANTABLE COLLAMER LENS, -10.5 DIOPTER, IN THE PATIENT'S RIGHT EYE (OD) ON (B)(6) 2017. THE PATIENT RETURNED THE NEXT DAY, (B)(6) 2017, IN PAIN, NAUSEOUS, WITH A PRESSURE SPIKE (60MMHG) AND STEAMY EYE. ANOTHER IRIDOTOMY WAS PERFORMED AND PRESSURE DROPPED DOWN TO 40MMHG. THE CHAMBER WAS SHALLOW, WITH SOME ANGLE CLOSUR…	Lens Extraction + Secondary Operation	Not_Resolved
https://www.accessdata.fda.gov/scripts/cdrh/cfdocs/cfMAUDE/Detail.CFM?MDRFOI__ID=17777874&pc=MTA	2023826-2023-04107	2023-07-15	Injury	STAAR SURGICAL COMPANY	2023-09-19	MTA	IMPLANTABLE COLLAMER LENS (ICL)	Adverse Event Without Identified Device or Use Problem	Intraocular Pressure Increased; No Clinical Signs, Symptoms or Conditions	P030016	NA	1	Event Description: THE REPORTER INDICATED THAT A 12.6MM VICMO12.6 IMPLANTABLE COLLAMER LENS OF -14.00 DIOPTER WAS IMPLANTED INTO THE PATIENTS RIGHT EYE (OD) ON (B)(6) 2022. ON (B)(6) 2023 THE LENS WAS EXPLANTED DUE TO ELEVATED INTRAOCULAR PRESSURE AND SIGNIFICANT REDUCTION OF IRIDO-CORNEAL ANGELS. THE REPORTER STATED " PREOPERATIVE BASAL IOP WAS HIGHER THAN NORMAL, AND NO FURTHER EXAMINATION WAS …	Lens Extraction	Resolved
https://www.accessdata.fda.gov/scripts/cdrh/cfdocs/cfMAUDE/Detail.CFM?MDRFOI__ID=11939033&pc=MTA	2023826-2021-01672	2021-05-11	Injury	STAAR SURGICAL COMPANY	2021-06-04	MTA	IMPLANTABLE COLLAMER LENS (ICL)	Inadequacy of Device Shape and/or Size	Intraocular Pressure Increased; No Clinical Signs, Symptoms or Conditions	P030016	NA	1	Event Description: THE REPORTER INDICATED THAT THE SURGEON IMPLANTED A 13.2MM MICL13.2, -5.5 DIOPTER, IMPLANTABLE COLLAMER LENS INTO THE PATIENT'S LEFT EYE (OS) ON (B)(6) 2021. THE LENS WAS EXPLANTED DUE TO EXCESSIVE VAULT ON (B)(6) 2021. THIS RESOLVED THE PROBLEM.CAUSE OF THE EVENT IS REPORTED AS DEVICE. REPORTEDLY, OBJECTIVE SLE: TRACE DMF. Manufacturer Narrative: H3: DEVICE EVALUATION - LENS W…	Lens Extraction	Resolved
https://www.accessdata.fda.gov/scripts/cdrh/cfdocs/cfMAUDE/Detail.CFM?MDRFOI__ID=11986305&pc=MTA	2023826-2021-01864	2021-05-19	Injury	STAAR SURGICAL COMPANY	2021-06-11	MTA	IMPLANTABLE COLLAMER LENS (ICL)	Inadequacy of Device Shape and/or Size	Intraocular Pressure Increased; No Clinical Signs, Symptoms or Conditions	N/A	NA	1	Event Description: THE REPORTER INDICATED THAT THE SURGEON IMPLANTED A 12.6MM VICM5_12.6 IMPLANTABLE COLLAMER LENS, -12.0 DIOPTER INTO THE PATIENT'S RIGHT EYE (OD) ON (B)(6) 2021. ON (B)(6) 2021 THE LENS WAS EXPLANTED DUE TO EXCESSIVE VAULT, SIGNIFICANT REDUCTION OF IRIDO-CORNEAL ANGLES (ICA), ANGLE CLOSURE, AND ELEVATED IOP. THE PROBLEM WAS RESOLVED. THE CAUSE OF THE EVENT IS REPORTED AS DEVICE.…	Lens Extraction	Resolved
https://www.accessdata.fda.gov/scripts/cdrh/cfdocs/cfMAUDE/Detail.CFM?MDRFOI__ID=11986314&pc=MTA	2023826-2021-01865	2021-05-19	Injury	STAAR SURGICAL COMPANY	2021-06-11	MTA	IMPLANTABLE COLLAMER LENS (ICL)	Inadequacy of Device Shape and/or Size	Intraocular Pressure Increased; No Clinical Signs, Symptoms or Conditions	N/A	NA	1	Event Description: THE REPORTER INDICATED THAT THE SURGEON IMPLANTED A 12.6MM VICM5_12.6 IMPLANTABLE COLLAMER LENS, -12.0 DIOPTER INTO THE PATIENT'S LEFT EYE (OS) ON (B)(6) 2021. ON (B)(6) 2021 THE LENS WAS EXPLANTED DUE TO EXCESSIVE VAULT, SIGNIFICANT REDUCTION OF IRIDO-CORNEAL ANGLES (ICA), ANGLE CLOSURE, AND ELEVATED IOP. THE PROBLEM WAS RESOLVED. THE CAUSE OF THE EVENT IS REPORTED AS DEVICE. …	Lens Extraction	Resolved
https://www.accessdata.fda.gov/scripts/cdrh/cfdocs/cfMAUDE/Detail.CFM?MDRFOI__ID=12669504&pc=MTA	2023826-2021-04033	2021-09-28	Injury	STAAR SURGICAL COMPANY	2021-10-20	MTA	IMPLANTABLE COLLAMER LENS (ICL)	Inadequacy of Device Shape and/or Size	Intraocular Pressure Increased; No Clinical Signs, Symptoms or Conditions	P030016	NA	1	Event Description: THE REPORTER INDICATED THE SURGEON IMPLANTED A 12.6MM MICL12.6 IMPLANTABLE COLLAMER LENS, -11.00 DIOPTER, IN THE PATIENTS RIGHT EYE (OD) ON (B)(6) 2021. THE LENS WAS EXPLANTED ON (B)(6) 2021 DUE TO EXCESSIVE VAULTING AND ELEVATED INTRAOCULAR PRESSURE (IOP). AQUEOUS WAS RELEASED FROM THE CHAMBER. THE LENS WAS REPLACED WITH A SHORTER LENS AND THE PROBLEM WAS RESOLVED. THE CAUSE O…	Lens Exchange	Resolved
https://www.accessdata.fda.gov/scripts/cdrh/cfdocs/cfMAUDE/Detail.CFM?MDRFOI__ID=14401934&pc=MTA	2023826-2022-01487	2022-04-08	Injury	STAAR SURGICAL COMPANY	2022-05-13	MTA	IMPLANTABLE COLLAMER LENS (ICL)	Inadequacy of Device Shape and/or Size	Intraocular Pressure Increased; No Clinical Signs, Symptoms or Conditions	P030016	NA	1	Event Description: THE REPORTER INDICATED THAT A 13.7MM MICL13.7 -5.0 DIOPTER IMPLANTABLE COLLAMER LENS WAS IMPLANTED INTO THE PATIENTS EYE ON (B)(6) 2022. THE LENS WAS REMOVED ON (B)(6) 2022 DUE TO HIGH VAULT AND REPLACED WITH A SHORTER LENGTH LENS. IF ADDITIONAL INFORMATION IS RECEIVED A SUPPLEMENTAL MEDWATCH REPORT WILL BE SUBMITTED Manufacturer Narrative: B5- THE REPORTER INDICATED THAT A 13.…	Lens Exchange	Resolved
https://www.accessdata.fda.gov/scripts/cdrh/cfdocs/cfMAUDE/Detail.CFM?MDRFOI__ID=15099731&pc=MTA	2023826-2022-02398	2022-06-07	Injury	STAAR SURGICAL COMPANY	2022-07-25	MTA	IMPLANTABLE COLLAMER LENS (ICL)	Inadequacy of Device Shape and/or Size	Intraocular Pressure Increased; No Clinical Signs, Symptoms or Conditions	P030016	NA	1	Event Description: THE REPORTER INDICATED THAT A 13.2MM VICM513.2 IMPLANTABLE COLLAMER LENS OF -9.5 DIOPTER WAS IMPLANTED INTO THE PATIENT'S RIGHT EYE (OD) ON (B)(6) 2022. ON (B)(6) 2022, THE LENS WAS EXCHANGED FOR A SHORTER LENGTH LENS DUE TO EXCESSIVE VAULT AND ELEVATED IOP WITHOUT PUPIL BLOCK AND ANGLE CLOSURE. THE EXCHANGE RESOLVED THE PROBLEM. Manufacturer Narrative: WEIGHT:UNKNOWN, ETHNICIT…	Lens Exchange	Resolved
https://www.accessdata.fda.gov/scripts/cdrh/cfdocs/cfMAUDE/Detail.CFM?MDRFOI__ID=17295510&pc=MTA	2023826-2023-02791	2023-05-30	Injury	STAAR SURGICAL COMPANY	2023-07-10	MTA	IMPLANTABLE COLLAMER LENS (ICL)	Inadequacy of Device Shape and/or Size	Intraocular Pressure Increased; No Clinical Signs, Symptoms or Conditions	P030016	NA	1	Event Description: THE REPORTER INDICATED THAT THE SURGEON IMPLANTED A 12.6MM VICMO12.6 IMPLANTABLE COLLAMER LENS OF DIOPTER -12.0 INTO THE PATIENT'S LEFT EYE (OS) ON (B)(6) 2023. THE LENS WAS EXCHANGED ON (B)(6) 2023 FOR A SHORTER LENGTH LENS DUE TO EXCESSIVE VAULT. THIS RESOLVED THE PROBLEM. CAUSE WAS REPORTED AS UNKNOWN. Manufacturer Narrative: CLAIM# (B)(4). Manufacturer Narrative: B5 - "THE …	Lens Exchange	Resolved
https://www.accessdata.fda.gov/scripts/cdrh/cfdocs/cfMAUDE/Detail.CFM?MDRFOI__ID=15285150&pc=MTA	2023826-2022-02891	NA	Injury	STAAR SURGICAL COMPANY	2022-08-24 04:00:00	MTA	IMPLANTABLE COLLAMER LENS (ICL)	Inadequacy of Device Shape and/or Size	Intraocular Pressure Increased; No Clinical Signs, Symptoms or Conditions	P030016	NA	1	Event Description: THE REPORTER INDICATED THAT A 13.2MM VICM5 13.2 IMPLANTABLE COLLAMER LENS OF -8.50 DIOPTER WAS IMPLANTED INTO THE PATIENTS RIGHT EYE (OD) ON (B)(6) 2022. ON (B)(6) 2022 THE LENS WAS REMOVED DUE TO A HIGH VAULT. A REPLACEMENT LENS WAS IMPLANTED OF UNKNOWN MODEL AND SIZE. IF ADDITIONAL INFORMATION IS RECEIVED A SUPPLEMENTAL MEDWATCH REPORT WILL BE SUBMITTED. Manufacturer Narrativ…	Lens Exchange	Unknown
https://www.accessdata.fda.gov/scripts/cdrh/cfdocs/cfMAUDE/Detail.CFM?MDRFOI__ID=17561598&pc=MTA	2023826-2023-03510	NA	Injury	STAAR SURGICAL COMPANY	2023-08-16 04:00:00	MTA	IMPLANTABLE COLLAMER LENS (ICL)	No Apparent Adverse Event	Intraocular Pressure Increased; No Clinical Signs, Symptoms or Conditions	P030016	NA	1	Event Description: THE REPORTER INDICATED THAT A REPLACEMENT 12.6MM VICM512.6 IMPLANTABLE COLLAMER LENS OF A -4.5 WAS IMPLANTED INTO THE PATIENT'S RIGHT EYE (OD) ON (B)6) 2023. THE PROBLEM WAS RESOLVED. REPORTEDLY, "A FEW STRIAE ON THE ENDOTHELIUM." Manufacturer Narrative: A4-A6:UNK . H6: WORK ORDER SEARCH: NO SIMILAR COMPLAINTS WITHIN ASSOCIATED LOTS WERE FOUND. CLAIM# (B)(4).	Unknown	Unknown
https://www.accessdata.fda.gov/scripts/cdrh/cfdocs/cfMAUDE/Detail.CFM?MDRFOI__ID=17684361&pc=MTA	2023826-2023-03760	2023-03-11	Injury	STAAR SURGICAL COMPANY	2023-09-05	MTA	IMPLANTABLE COLLAMER LENS (ICL)	Off-Label Use; Inadequacy of Device Shape and/or Size	Intraocular Pressure Increased; No Clinical Signs, Symptoms or Conditions	P030016	NA	1	Event Description: THE REPORTER INDICATED THAT THE SURGEON IMPLANTED A 12.6MM VICMO12.6 IMPLANTABLE COLLAMER LENS OF DIOPTER -6.0 INTO THE PATIENT'S LEFT EYE (OS) ON (B)(6) 2023. THE LENS WAS REMOVED ON (B)(6) 2023 DUE TO EXCESSIVE VAULT AND ELEVATED IOP. LATER ON (B)(6) 2023 A SHORTER LENGTH LENS WAS IMPLANTED AND THIS RESOLVED THE PROBLEM. CAUSE OF EVENT REPORTED AS UNKNOWN. Manufacturer Narrat…	Lens Exchange	Resolved
https://www.accessdata.fda.gov/scripts/cdrh/cfdocs/cfMAUDE/Detail.CFM?MDRFOI__ID=11065610&pc=MTA	2023826-2020-03104	2020-11-24	Injury	STAAR SURGICAL COMPANY	2020-12-23	MTA	IMPLANTABLE COLLAMER LENS (ICL)	Unintended Movement; No Apparent Adverse Event	Intraocular Pressure Increased; No Clinical Signs, Symptoms or Conditions	N/A	NA	1	Event Description: THE REPORTER INDICATED THAT THE SURGEON IMPLANTED UPSIDE DOWN AND REMOVED A 12.6MM VICMO12.6, -09.50 DIOPTER, IMPLANTABLE COLLAMER LENS, INTO THE PATIENT'S RIGHT EYE ON (B)(6) 2020. THERE WAS PATIENT CONTACT (LENS TOUCHED THE EYE) WITH NO PATIENT INJURY. THE PROBLEM WAS RESOLVED. CAUSE OF THE EVENT IS REPORTED AS UNKNOWN. PER THE REPORTER ON (B)(6) 2020, "ANOTHER LENS WILL BE I…	Lens Extraction	Resolved
https://www.accessdata.fda.gov/scripts/cdrh/cfdocs/cfMAUDE/Detail.CFM?MDRFOI__ID=9913311&pc=MTA	2023826-2020-00744	2018-04-26	Injury	STAAR SURGICAL COMPANY	2020-04-01	MTA	IMPLANTABLE COLLAMER LENS (ICL)	Adverse Event Without Identified Device or Use Problem	Intraocular Pressure Increased; No Code Available	P030016	NA	1	Event Description: THE REPORTER INDICATED THE SURGEON IMPLANTED A 12.6MM MICL12.6 IMPLANTABLE COLLAMER LENS, -16.0 DIOPTER, IN THE PATIENT'S LEFT EYE (OS) ON (B)(6) 2018. THE LENS WAS EXPLANTED ON (B)(6) 2020 DUE TO PROGRESSIVE INCREASE IN INTRAOCULAR PRESSURE (IOP). THE SURGEON DID NOT IMPLANT ANOTHER LENS. THE CAUSE OF THE EVENT WAS UNKNOWN. Manufacturer Narrative: H3 - RETURNED IN A SPECIMEN C…	Lens Extraction	Unknown
https://www.accessdata.fda.gov/scripts/cdrh/cfdocs/cfMAUDE/Detail.CFM?MDRFOI__ID=7860761&pc=MTA	2023826-2018-01247	2018-08-10	Injury	STAAR SURGICAL COMPANY	2018-09-10	MTA	IMPLANTABLE COLLAMER LENS (ICL)	Adverse Event Without Identified Device or Use Problem	Intraocular Pressure Increased; No Code Available	N/A	NA	1	Event Description: THE REPORTER INDICATED THAT THE SURGEON IMPLANTED A 13.2 MM VICM5_13.2, -10.5 DIOPTER, IMPLANTABLE COLLAMER LENS IN THE PATIENT'S RIGHT EYE (OD) ON (B)(6) 2018. UPON ASSING ON (B)(6) 2018, ELEVATED IOP OF 39 MMHG WITHOUT PUPIL BLOCK AND ANGLE CLOSURE. LENS WAS EXPLANTED ON (B)(6) 2018 WITH NO PLANS TO EXCHANGE LENS. AFTER REMOVAL OF LENS, THE PATIENT'S INTRAOCULAR PRESSURE RETU…	Lens Extraction	Resolved
https://www.accessdata.fda.gov/scripts/cdrh/cfdocs/cfMAUDE/Detail.CFM?MDRFOI__ID=8337166&pc=MTA	2023826-2019-00248	2018-10-03	Injury	STAAR SURGICAL COMPANY	2019-02-13	MTA	IMPLANTABLE COLLAMER LENS (ICL)	Adverse Event Without Identified Device or Use Problem	Intraocular Pressure Increased; No Code Available	NA	NA	1	Event Description: THE REPORTER INDICATED THE SURGEON IMPLANTED A 12.6MM VICM5_12.6 IMPLANTABLE COLLAMER LENS, -08.00 DIOPTER, IN THE PATIENTS LEFT EYE (OS) ON (B)(6) 2018. THE LENS WAS EXPLANTED ON (B)(6) 2018 DUE TO PUPIL BLOCK, WITH ELEVATED INTRAOCULAR PRESSURE AND UNREACTIVE PUPIL (FIXED). THE SURGEON ATTEMPTED TO FIX THE PUPIL BLOCK SURGICALLY ON (B)(6) 2018 BUT WAS UNSUCCESSFUL. A SYNECHIA…	Lens Extraction	Not_Resolved
https://www.accessdata.fda.gov/scripts/cdrh/cfdocs/cfMAUDE/Detail.CFM?MDRFOI__ID=8287616&pc=MTA	2023826-2019-00180	2018-12-20	Injury	STAAR SURGICAL COMPANY	2019-01-29	MTA	IMPLANTABLE COLLAMER LENS (ICL)	Adverse Event Without Identified Device or Use Problem	Intraocular Pressure Increased; No Code Available	P030016	NA	1	Event Description: THE REPORTER INDICATED THAT THE SURGEON IMPLANTED A 12.6MM MICL12.6 IMPLANTABLE COLLAMER LENS, -11.5 DIOPTER, INTO THE PATIENT'S LEFT (OS) EYE ON (B)(6) 2018. ON (B)(6) 2018 THE LENS WAS EXPLANTED DUE TO INCREASED POST-OP PRESSURE. ON (B)(6) 2019 A SHORTER LENS WAS IMPLANTED AND THE PROBLEM WAS RESOLVED. NO PATIENT INJURY IS NOTED. Manufacturer Narrative: (B)(4). Manufacturer N…	Lens Exchange	Resolved
https://www.accessdata.fda.gov/scripts/cdrh/cfdocs/cfMAUDE/Detail.CFM?MDRFOI__ID=8441979&pc=MTA	2023826-2019-00438	2019-01-16	Injury	STAAR SURGICAL COMPANY	2019-03-21	MTA	IMPLANTABLE COLLAMER LENS (ICL)	Adverse Event Without Identified Device or Use Problem	Intraocular Pressure Increased; No Code Available	NA	NA	1	Event Description: THE REPORTER INDICATED THE SURGEON IMPLANTED A 12.6MM VICM5_12.6 IMPLANTABLE COLLAMER LENS, -12.50 DIOPTER, IN THE PATIENT'S RIGHT EYE (OD) ON (B)(6) 2019. THE LENS WAS EXPLANTED ON (B)(6) 2019 DUE TO PUPIL BLOCK, WITH ELEVATED INTRAOCULAR PRESSURE AND SIGNIFICANT REDUCTION OF IRIDO-CORNEAL ANGLES. THE LENS WAS NOT EXCHANGED FOR ANOTHER LENS. Manufacturer Narrative: DEVICE EVAL…	Lens Extraction	Unknown
https://www.accessdata.fda.gov/scripts/cdrh/cfdocs/cfMAUDE/Detail.CFM?MDRFOI__ID=8668952&pc=MTA	2023826-2019-01045	2019-02-19	Injury	STAAR SURGICAL COMPANY	2019-06-04	MTA	IMPLANTABLE COLLAMER LENS (ICL)	Adverse Event Without Identified Device or Use Problem	Intraocular Pressure Increased; No Code Available	NA	NA	1	Event Description: THE REPORTER INDICATED THE SURGEON IMPLANTED A 12.6MM VICM5_12.6 IMPLANTABLE COLLAMER LENS, -11.50 DIOPTER, IN THE PATIENT'S LEFT EYE (OS) ON (B)(6) 2018. THE LENS WAS EXPLANTED ON (B)(6) 2019 DUE TO ELEVATED INTRAOCULAR PRESSURE (IOP). THE LENS WAS EXCHANGED FOR A SHORTER LENS AND THE PROBLEM WAS RESOLVED. THE CAUSE OF THE EVENT WAS UNKNOWN. Manufacturer Narrative: DEVICE EVAL…	Lens Exchange	Resolved
https://www.accessdata.fda.gov/scripts/cdrh/cfdocs/cfMAUDE/Detail.CFM?MDRFOI__ID=9152716&pc=MTA	2023826-2019-01856	2019-05-20	Injury	STAAR SURGICAL COMPANY	2019-10-03	MTA	IMPLANTABLE COLLAMER LENS (ICL)	Adverse Event Without Identified Device or Use Problem	Intraocular Pressure Increased; No Code Available	P030016	NA	1	Event Description: THE REPORTER INDICATED THAT 13.2MM, MICL13.2, -14.0 DIOPTER, IMPLANTABLE COLLAMER LENS WAS IMPLANTED ON (B)(6) 2019 AND EXPLANTED ON (B)(6) 2019 DUE TO ELEVATED PRESSURE THAT COULD NOT BE RESOLVED WITH ADDITIONAL PI'S AND MEDS.ADDITIONAL INFORMATION HAS BEEN REQUESTED BUT NONE HAS BEEN FORTHCOMING. IF ADDITIONAL INFORMATION IS RECEIVED A SUPPLEMENTAL MEDWATCH REPORT WILL BE SUB…	Lens Extraction + Secondary Operation	Resolved
https://www.accessdata.fda.gov/scripts/cdrh/cfdocs/cfMAUDE/Detail.CFM?MDRFOI__ID=9153161&pc=MTA	2023826-2019-01857	2019-05-20	Injury	STAAR SURGICAL COMPANY	2019-10-03	MTA	IMPLANTABLE COLLAMER LENS (ICL)	Adverse Event Without Identified Device or Use Problem	Intraocular Pressure Increased; No Code Available	P030016	NA	1	Event Description: THE REPORTER INDICATED THAT 13.2MM, MICL13.2, -15.0 DIOPTER, IMPLANTABLE COLLAMER LENS WAS IMPLANTED ON (B)(6) 2019 AND EXPLANTED ON (B)(6) 2019 DUE TO ELEVATED PRESSURE THAT COULD NOT BE RESOLVED WITH ADDITIONAL PI'S AND MEDS.ADDITIONAL INFORMATION HAS BEEN REQUESTED BUT NONE HAS BEEN FORTHCOMING. IF ADDITIONAL INFORMATION IS RECEIVED A SUPPLEMENTAL MEDWATCH REPORT WILL BE SUB…	Lens Extraction + Secondary Operation	Resolved
https://www.accessdata.fda.gov/scripts/cdrh/cfdocs/cfMAUDE/Detail.CFM?MDRFOI__ID=8841538&pc=MTA	2023826-2019-01378	2019-07-03	Injury	STAAR SURGICAL COMPANY	2019-07-30	MTA	IMPLANTABLE COLLAMER LENS (ICL)	Adverse Event Without Identified Device or Use Problem	Intraocular Pressure Increased; No Code Available	N/A	NA	1	Event Description: THE REPORTER INDICATED THAT A 12.6MM, VICM5_12.6, -7.00 DIOPTER, IMPLANTABLE COLLAMER LENS WAS IMPLANTED INTO THE PATIENTS RIGHT EYE (OD) ON (B)(6) 2019. ON (B)(6) 2019, THREE WEEKS POST OP THE SURGEON NOTICED DILATED PUPIL. ELEVATED IOP WAS NOTICED ON (B)(6) 2019. SURGICAL INTERVENTION (YAG PIS) AND MEDICAL INTERVENTION (PREDNISOLONE STEROIDS, MIOTICS, MYDRIATICS, MANNITOL, AN…	Lens Retention + Secondary Operation	Not_Resolved
https://www.accessdata.fda.gov/scripts/cdrh/cfdocs/cfMAUDE/Detail.CFM?MDRFOI__ID=8841649&pc=MTA	2023826-2019-01379	2019-07-03	Injury	STAAR SURGICAL COMPANY	2019-07-30	MTA	IMPLANTABLE COLLAMER LENS (ICL)	Adverse Event Without Identified Device or Use Problem	Intraocular Pressure Increased; No Code Available	N/A	NA	1	Event Description: THE REPORTER INDICATED THAT A 12.6MM, VICM5_12.6, -6.00 DIOPTER, IMPLANTABLE COLLAMER LENS WAS IMPLANTED INTO THE PATIENTS LEFT EYE (OS) ON (B)(6) 2019. ON (B)(6) 2019, THREE WEEKS POST OP THE SURGEON NOTICED DILATED PUPIL. ELEVATED IOP WAS NOTICED ON (B)(6) 2019. SURGICAL INTERVENTION (YAG PIS) AND MEDICAL INTERVENTION (PREDNISOLONE STEROIDS, MIOTICS, MYDRIATICS, MANNITOL, AND…	Lens Retention + Secondary Operation	Not_Resolved
https://www.accessdata.fda.gov/scripts/cdrh/cfdocs/cfMAUDE/Detail.CFM?MDRFOI__ID=10222176&pc=MTA	2023826-2020-01405	2019-09-20	Injury	STAAR SURGICAL COMPANY	2020-07-01	MTA	IMPLANTABLE COLLAMER LENS (ICL)	Adverse Event Without Identified Device or Use Problem	Intraocular Pressure Increased; No Code Available	N/A	NA	1	Event Description: THE REPORTER INDICATED THE SURGEON IMPLANTED A 13.2MM VICM5_13.2 IMPLANTABLE COLLAMER LENS, -11.5 DIOPTER INTO THE PATIENT'S RIGHT EYE (OD) ON (B)(6) 2019. ON (B)(6) 2020 THE LENS WAS EXPLANTED DUE TO ELEVATED IOP. THE PROBLEM WAS RESOLVED. Manufacturer Narrative: H3-DEVICE EVALUATION: THE LENS WAS RETURNED DRY IN A MICRO-CENTRIFUGE VIAL. THERE WAS CLEAR SURGICAL DEBRIS ON THE …	Lens Extraction	Resolved
https://www.accessdata.fda.gov/scripts/cdrh/cfdocs/cfMAUDE/Detail.CFM?MDRFOI__ID=10222185&pc=MTA	2023826-2020-01406	2019-09-20	Injury	STAAR SURGICAL COMPANY	2020-07-01	MTA	IMPLANTABLE COLLAMER LENS (ICL)	Adverse Event Without Identified Device or Use Problem	Intraocular Pressure Increased; No Code Available	N/A	NA	1	Event Description: THE REPORTER INDICATED THE SURGEON IMPLANTED A 13.2MM VICM5_13.2 IMPLANTABLE COLLAMER LENS, -11.5 DIOPTER INTO THE PATIENT'S LEFT EYE (OS) ON (B)(6) 2019. ON (B)(6) 2020 THE LENS WAS EXPLANTED DUE TO ELEVATED IOP. THE PROBLEM WAS RESOLVED. Manufacturer Narrative: H3-DEVICE EVALUATION: THE LENS WAS RETURNED IN A MICRO-CENTRIFUGE VIAL WITH MOISTURE ON THE LENS. THERE WAS CLEAR SU…	Lens Extraction	Resolved
https://www.accessdata.fda.gov/scripts/cdrh/cfdocs/cfMAUDE/Detail.CFM?MDRFOI__ID=9507349&pc=MTA	2023826-2019-02475	2019-11-13	Injury	STAAR SURGICAL COMPANY	2019-12-20	MTA	IMPLANTABLE COLLAMER LENS (ICL)	Adverse Event Without Identified Device or Use Problem	Intraocular Pressure Increased; No Code Available	P030016	NA	1	Event Description: THE REPORTER INDICATED THAT A 13.2MM, MICL13.2, -8.5 DIOPTER, IMPLANTABLE COLLAMER LENS WAS EXPLANTED ON (B)(6) 2019 DUE TO HIGH PRESSURE. THERE WAS NO PATIENT INJURY. THE REPORTER STATED THAT THE SURGEON WILL BE REPLACING THE LENS WITH A SHORTER LENGTH LENS. ADDITIONAL INFORMATION HAS BEEN REQUESTED BUT NONE HAS BEEN FORTHCOMING. IF ADDITIONAL INFORMATION IS RECEIVED A SUPPLEM…	Lens Exchange	Unknown
https://www.accessdata.fda.gov/scripts/cdrh/cfdocs/cfMAUDE/Detail.CFM?MDRFOI__ID=9492475&pc=MTA	2023826-2019-02445	2019-11-19	Injury	STAAR SURGICAL COMPANY	2019-12-19	MTA	IMPLANTABLE COLLAMER LENS (ICL)	Adverse Event Without Identified Device or Use Problem	Intraocular Pressure Increased; No Code Available	N/A	NA	1	Event Description: THE REPORTER INDICATED THAT A 13.2MM, VICMO13.2, -7.00 DIOPTER IMPLANTABLE COLLAMER LENS WAS IMPLANTED INTO THE PATIENTS RIGHT EYE (OD) ON (B)(6) 2019 AND THE PATIENT EXPERIENCED ELEVATED IOP. A VAULT VALUE WAS REPORTED AND PUPIL BLOCK WITH ELEVATED IOP (28 MMHG). ADDITIONAL SURGICAL INTERVENTION (YAG, IRIDOTOMIA, IRIS SUTURE) WERE PERFORMED. IT WAS REPORTED THAT THE IOP WAS DE…	Lens Retention + Secondary Operation	Resolved
https://www.accessdata.fda.gov/scripts/cdrh/cfdocs/cfMAUDE/Detail.CFM?MDRFOI__ID=10222180&pc=MTA	2023826-2020-01410	2020-01-06	Injury	STAAR SURGICAL COMPANY	2020-07-01	MTA	IMPLANTABLE COLLAMER LENS (ICL)	Adverse Event Without Identified Device or Use Problem	Intraocular Pressure Increased; No Code Available	N/A	NA	1	Event Description: THE REPORTER INDICATED THE SURGEON IMPLANTED A 12.6MM VICM5_12.6 IMPLANTABLE COLLAMER LENS, -12.5 DIOPTER INTO THE PATIENT'S LEFT EYE (OS) ON (B)(6) 2019. ON (B)(6) 2020 THE LENS WAS EXPLANTED DUE TO ELEVATED IOP. THE PROBLEM WAS RESOLVED. Manufacturer Narrative: H3-DEVICE EVALUATION: THE LENS WAS RETURNED IN A MICRO-CENTRIFUGE VIAL WITH MOISTURE ON THE LENS. VISUAL INSPECTION …	Lens Extraction	Resolved
https://www.accessdata.fda.gov/scripts/cdrh/cfdocs/cfMAUDE/Detail.CFM?MDRFOI__ID=10222182&pc=MTA	2023826-2020-01409	2020-01-06	Injury	STAAR SURGICAL COMPANY	2020-07-01	MTA	IMPLANTABLE COLLAMER LENS (ICL)	Adverse Event Without Identified Device or Use Problem	Intraocular Pressure Increased; No Code Available	N/A	NA	1	Event Description: THE REPORTER INDICATED THE SURGEON IMPLANTED A 12.6MM VICM5_12.6 IMPLANTABLE COLLAMER LENS, -12.5 DIOPTER INTO THE PATIENT'S RIGHT EYE (OD) ON (B)(6) 2019. ON (B)(6) 2020 THE LENS WAS EXPLANTED DUE TO ELEVATED IOP. THE PROBLEM WAS RESOLVED. Manufacturer Narrative: H3-DEVICE EVALUATION: THE LENS WAS RETURNED IN A MICRO-CENTRIFUGE VIAL WITH MOISTURE ON THE LENS. THERE WAS CLEAR S…	Lens Extraction	Resolved
https://www.accessdata.fda.gov/scripts/cdrh/cfdocs/cfMAUDE/Detail.CFM?MDRFOI__ID=10484156&pc=MTA	2023826-2020-02011	2020-05-08	Injury	STAAR SURGICAL COMPANY	2020-09-02	MTA	IMPLANTABLE COLLAMER LENS (ICL)	Adverse Event Without Identified Device or Use Problem	Intraocular Pressure Increased; No Code Available	N/A	NA	1	Event Description: THE REPORTER INDICATED THAT A 13.2MM, VICMO13.2, -2.25 DIOPTER, IMPLANTABLE COLLAMER LENS WAS IMPLANTED INTO THE PATIENTS LEFT EYE (OS) ON (B)(6) 2020. ON (B)(6) 2020 THE LENS WAS EXPLANTED DUE TO PUPIL BLOCK WITH ELEVATED IOP AND THE PROBLEM RESOLVED. THE REPORTER STATED THAT THE PATIENT FELT UNCOMFORTABLE AND WANTED THE LENS REMOVED. Manufacturer Narrative: ADDITIONAL INFORMA…	Lens Extraction	Resolved
https://www.accessdata.fda.gov/scripts/cdrh/cfdocs/cfMAUDE/Detail.CFM?MDRFOI__ID=6341607&pc=MTA	2023826-2017-00241	NA	Injury	STAAR SURGICAL COMPANY	2017-02-17	MTA	IMPLANTABLE COLLAMER LENS (ICL)	Adverse Event Without Identified Device or Use Problem	Intraocular Pressure Increased; No Code Available	P030016	NA	1	Event Description: THE REPORTER INDICATED THE SURGEON IMPLANTED A 12.6MM MICL12.6 IMPLANTABLE COLLAMER LENS, -16.0 DIOPTER, IN THE PATIENT'S EYE AND IT WAS REPORTED THE INTRAOCULAR PRESSURE WAS ELEVATED AND THE ANGLE WAS TOO NARROW. THE LENS REMAINS IMPLANTED. ADDITIONAL INFORMATION HAS BEEN REQUESTED BUT NONE HAS BEEN FORTHCOMING. IF ADDITIONAL INFORMATION IS RECEIVED, A SUPPLEMENTAL MEDWATCH RE…	Lens Retention	Unknown
https://www.accessdata.fda.gov/scripts/cdrh/cfdocs/cfMAUDE/Detail.CFM?MDRFOI__ID=9485143&pc=MTA	2023826-2019-02444	NA	Injury	STAAR SURGICAL COMPANY	2019-12-17 05:00:00	MTA	IMPLANTABLE COLLAMER LENS (ICL)	Adverse Event Without Identified Device or Use Problem	Intraocular Pressure Increased; No Code Available	N/A	NA	1	Event Description: THE REPORTER INDICATED THAT A 13.7MM,VICM5_13.7, -10.00 DIOPTER IMPLANTABLE COLLAMER LENS WAS IMPLANTED INTO THE PATIENTS RIGHT EYE (OD). THE PATIENT EXPERIENCED ELEVATED INTRAOCULAR PRESSURE AND PI HAD TO BE PERFORMED TO BRING THE PRESSURE UNDER CONTROL. ADDITIONAL INFORMATION HAS BEEN REQUESTED BUT NONE HAS BEEN FORTHCOMING. IF ADDITIONAL INFORMATION IS RECEIVED A SUPPLEMENTA…	Lens Retention + Secondary Operation	Unknown
https://www.accessdata.fda.gov/scripts/cdrh/cfdocs/cfMAUDE/Detail.CFM?MDRFOI__ID=9169871&pc=MTA	2023826-2019-01893	2019-09-05	Injury	STAAR SURGICAL COMPANY	2019-10-08	MTA	IMPLANTABLE COLLAMER LENS (ICL)	Adverse Event Without Identified Device or Use Problem; No Apparent Adverse Event	Intraocular Pressure Increased; No Code Available	P030016	NA	1	Event Description: THE REPORTER INDICATED THAT A 12.6MM MICL12.6, -16.0 DIOPTER, IMPLANTABLE COLLAMER LENS TORE/BROKE DURING INJECTION/DELIVERY INTO THE EYE ON (B)(6) 2019. THE REPORTER REPORTED PRE-OP AND POST OP ENDOTHELIAL CELL COUNT, ELEVATED IOP THAT LASTED 4 HOURS AND INCISION ENLARGEMENT. THE LENS WAS REMOVED AND EXCHANGED WITHIN THE SAME SURGERY AND THE PROBLEM RESOLVED. CAUSE OF EVENT WA…	Lens Exchange	Resolved
https://www.accessdata.fda.gov/scripts/cdrh/cfdocs/cfMAUDE/Detail.CFM?MDRFOI__ID=9350566&pc=MTA	2023826-2019-02188	2019-04-03	Injury	STAAR SURGICAL COMPANY	2019-11-20	MTA	IMPLANTABLE COLLAMER LENS (ICL)	Adverse Event Without Identified Device or Use Problem; Unintended Movement	Intraocular Pressure Increased; No Code Available	NA	NA	1	Event Description: THE REPORTER INDICATED THE SURGEON IMPLANTED A 12.6MM VICM5_12.6 IMPLANTABLE COLLAMER LENS, -10.00 DIOPTER, IN THE PATIENTS RIGHT EYE (OD) ON (B)(6) 2019. THE LENS WAS EXPLANTED ON (B)(6) 2019 DUE TO ELEVATED INTRAOCULAR PRESSURE (IOP) AND SIGNIFICANT REDUCTION OF IRIDO-CORNEAL ANGLES. THE LENS WAS EXCHANGED FOR ANOTHER SAME MODEL/LENGTH/DIOPTER LENS. ADDITIONAL INFORMATION HAS…	Lens Exchange	Resolved
https://www.accessdata.fda.gov/scripts/cdrh/cfdocs/cfMAUDE/Detail.CFM?MDRFOI__ID=5549349&pc=MTA	2023826-2016-00389	2014-04-24	Injury	STAAR SURGICAL COMPANY	2016-04-05	MTA	ICL (IMPLANTABLE COLLAMER LENS)	Appropriate Term/Code Not Available	Intraocular Pressure Increased; No Code Available	NA	NA	1	Event Description: THE REPORTER INDICATED THE SURGEON IMPLANTED A 12.6MM VICMO12.6 -13.50 DIOPTER IMPLANTABLE COLLAMER LENS IN PATIENT'S RIGHT EYE ON (B)(6) 2013. EXCESSIVE VAULT WITH ELEVATED INTRAOCULAR PRESSURE RISE WAS NOTED ON (B)(6) 2014. THE LENS WAS EXPLANTED ON (B)(6) 2015 ANS NO OTHER LENS WAS IMPLANTED. Manufacturer Narrative: THE LENS WAS RETURNED DRY IN A LENS CASE/VIAL WITH CLEAR SU…	Lens Extraction	Unknown
https://www.accessdata.fda.gov/scripts/cdrh/cfdocs/cfMAUDE/Detail.CFM?MDRFOI__ID=4578351&pc=MTA	2023826-2015-00257	2014-09-26	Injury	STAAR SURGICAL COMPANY	2015-03-06	MTA	ICL (IMPLANTABLE COLLAMER LENS)	Appropriate Term/Code Not Available	Intraocular Pressure Increased; No Code Available	P030016	NA	1	Event Description: THE REPORTER INDICATED THE SURGEON IMPLANTED A 12.5MM ICM125V4 IMPLANTABLE COLLAMER LENS IN THE PATIENT'S RIGHT EYE (OD) ON (B)(6) 2014. THE LENS WAS EXPLANTED ON (B)(6) 2014 DUE TO ELEVATED IOP. THE LENS WAS EXCHANGED FOR A SHORTER LENGTH LENS AND THE PROBLEM WAS RESOLVED. Manufacturer Narrative: (B)(4)._x000D_ _x000D_ Manufacturer Narrative: METHOD: MEDICAL REVIEW & WORK ORDE…	Lens Exchange	Resolved
https://www.accessdata.fda.gov/scripts/cdrh/cfdocs/cfMAUDE/Detail.CFM?MDRFOI__ID=4578988&pc=MTA	2023826-2015-00226	2014-09-26	Injury	STAAR SURGICAL COMPANY	2015-03-06	MTA	ICL (IMPLANTABLE COLLAMER LENS)	Appropriate Term/Code Not Available	Intraocular Pressure Increased; No Code Available	P030016	NA	1	Event Description: THE REPORTER INDICATED THE SURGEON IMPLANTED A 12.5MM ICM125V4 IMPLANTABLE COLLAMER LENS IN THE PATIENT'S LEFT EYE (OS) ON (B)(6) 2014. THE LENS WAS EXPLANTED ON (B)(6) 2014 DUE TO ELEVATED INTRAOCULAR PRESSURE. THE LENS WAS EXCHANGED FOR A SHORTER LENS AND THE PROBLEM WAS RESOLVED._x000D_ Manufacturer Narrative: (B)(4): EVALUATION:_x000D_ _x000D_ METHOD - WORK ORDER SEARCH._x0…	Lens Exchange	Resolved
https://www.accessdata.fda.gov/scripts/cdrh/cfdocs/cfMAUDE/Detail.CFM?MDRFOI__ID=4917149&pc=MTA	2023826-2015-00839	2015-03-19	Injury	STAAR SURGICAL COMPANY	2015-07-15	MTA	ICL (IMPLANTABLE COLLAMER LENS)	Appropriate Term/Code Not Available	Intraocular Pressure Increased; No Code Available	P030016	NA	1	Event Description: THE REPORTER INDICATED THE SURGEON IMPLANTED A 12.5MM ICM125V4 IMPLANTABLE COLLAMER LENS IN THE PATIENT'S RIGHT EYE (OD) ON (B)(6) 2015 AND ELEVATED IOP WAS OBSERVED POSTOPERATIVELY. A TRABECULETOMY WAS PERFORMED AND THE LENS WAS EXPLANTED A WEEK LATER. CATARACT SURGERY WAS PERFORMED AND AN IOL WAS IMPLANTED. Manufacturer Narrative: (B)(4).	Lens Exchange + Secondary Operation	Resolved
https://www.accessdata.fda.gov/scripts/cdrh/cfdocs/cfMAUDE/Detail.CFM?MDRFOI__ID=5146056&pc=MTA	2023826-2015-01247	2015-06-27	Injury	STAAR SURGICAL COMPANY	2015-10-13	MTA	ICL (IMPLANTABLE COLLAMER LENS)	Appropriate Term/Code Not Available	Intraocular Pressure Increased; No Code Available	PO30016	NA	1	Event Description: THE REPORTER INDICATED THE PRIMARY LENS WAS EXCHANGED FOR THIS LENS. THE SURGEON IMPLANTED A 11.5MM ICM115V4 IMPLANTABLE COLLAMER LENS, -13.50 DIOPTER IN THE PATIENT'S LEFT EYE (OD) ON (B)(6) 2015. THE LENS WAS EXPLANTED ON (B)(6) 2015 DUE TO EXCESSIVE VAULTING. THE PATIENT EXPERIENCED ELEVATED INTRAOCULAR PRESSURE (44MMHG). THE LENS WAS EXPLANTED AND NO OTHER LENS WAS IMPLANTE…	Lens Extraction	Resolved
https://www.accessdata.fda.gov/scripts/cdrh/cfdocs/cfMAUDE/Detail.CFM?MDRFOI__ID=5146356&pc=MTA	2023826-2015-01245	2015-06-27	Injury	STAAR SURGICAL COMPANY AG	2015-10-13	MTA	ICL (IMPLANTABLE COLLAMER LENS)	Appropriate Term/Code Not Available	Intraocular Pressure Increased; No Code Available	PO30016	NA	1	Event Description: THE REPORTER INDICATED THE PRIMARY LENS WAS EXCHANGED FOR THIS LENS. THE SURGEON IMPLANTED A 11.5MM ICM115V4 IMPLANTABLE COLLAMER LENS, -13.50 DIOPTER IN THE PATIENT'S RIGHT EYE (OD) ON (B)(6) 2015. THE LENS WAS EXPLANTED ON (B)(6) 2015 DUE TO EXCESSIVE VAULTING. THE PATIENT EXPERIENCED ELEVATED INTRAOCULAR PRESSURE (44MMHG). THE LENS WAS EXPLANTED AND NO OTHER LENS WAS IMPLANT…	Lens Extraction	Resolved
https://www.accessdata.fda.gov/scripts/cdrh/cfdocs/cfMAUDE/Detail.CFM?MDRFOI__ID=5309171&pc=MTA	2023826-2015-01693	2015-12-03	Injury	STAAR SURGICAL COMPANY	2015-12-17	MTA	ICL (IMPLANTABLE COLLAMER LENS)	Appropriate Term/Code Not Available	Intraocular Pressure Increased; No Code Available	P030016	NA	1	Event Description: THE REPORTER STATED THE SURGEON IMPLANTED A 13.2MM MICL13.2 IMPLANTABLE COLLAMER LENS, -10.5 DIOPTER, IN THE PATIENT'S RIGHT EYE (OD) ON (B)(6) 2015. THE LENS WAS EXPLANTED ON (B)(6) 2015 DUE TO ELEVATED INTRAOCULAR PRESSURE (IOP). ADDITIONAL INFORMATION HAS BEEN REQUESTED BUT NONE HAS BEEN FORTHCOMING. IF ADDITIONAL INFORMATION IS RECEIVED, A SUPPLEMENTAL MEDWATCH REPORT WILL …	Lens Extraction	Unknown
https://www.accessdata.fda.gov/scripts/cdrh/cfdocs/cfMAUDE/Detail.CFM?MDRFOI__ID=6036776&pc=MTA	2023826-2016-01471	2016-02-03	Injury	STAAR SURGICAL COMPANY	2016-10-18	MTA	ICL (IMPLANTABLE COLLAMER LENS)	Appropriate Term/Code Not Available	Intraocular Pressure Increased; No Code Available	NA	NA	1	Event Description: THE REPORTER INDICATED THAT THE SURGEON INSERTED A 12.1MM VICMO12.1 IMPLANTABLE COLLAMER LENS, -09.50 DIOPTER, IN THE PATIENT'S LEFT EYE ON(B)(6) 2016. THE LENS WAS EXPLANTED ON (B)(6) 2016 DUE TO ELEVATED INTRAOCULAR PRESSURE (WITHOUT PUPIL BLOCK AND ANGLE CLOSURE). Manufacturer Narrative: ADDITIONAL INFORMATION: DEVICE EVALUATION: THE LENS WAS RETURNED DRY IN A LENS CASE/VIAL…	Lens Extraction	Unknown
https://www.accessdata.fda.gov/scripts/cdrh/cfdocs/cfMAUDE/Detail.CFM?MDRFOI__ID=5579354&pc=MTA	2023826-2016-00467	2016-03-11	Injury	STAAR SURGICAL COMPANY	2016-04-14	MTA	ICL (IMPLANTABLE COLLAMER LENS)	Appropriate Term/Code Not Available	Intraocular Pressure Increased; No Code Available	P030016	NA	1	Event Description: THE REPORTER STATED THE SURGEON IMPLANTED A 13.2MM MICL13.2 IMPLANTABLE COLLAMER LENS, -11.5 DIOPTER, IN THE PATIENT'S RIGHT EYE (OD) ON (B)(6) 2016. THE REPORTER STATED AT ONE-DAY POST-OP, THE PATIENT RETURNED WITH CLOSED ANGLES AND HIGH PRESSURE (40MMHG). THE PERIPHERAL IRIDECTOMIES (PIS) WERE PATENT, BUT THE SURGEON PERFORMED 2 ADDITIONAL PIS AND DILATED THE PUPILS. A COUPLE…	Lens Retention + Secondary Operation	Resolved
https://www.accessdata.fda.gov/scripts/cdrh/cfdocs/cfMAUDE/Detail.CFM?MDRFOI__ID=5579395&pc=MTA	2023826-2016-00466	2016-03-11	Injury	STAAR SURGICAL COMPANY	2016-04-14	MTA	ICL (IMPLANTABLE COLLAMER LENS)	Appropriate Term/Code Not Available	Intraocular Pressure Increased; No Code Available	P030016	NA	1	Event Description: THE REPORTER STATED THE SURGEON IMPLANTED A 13.2MM MICL13.2 IMPLANTABLE COLLAMER LENS, -13.0 DIOPTER, IN THE PATIENT'S LEFT EYE (OS) ON (B)(6) 2016. THE REPORTER STATED AT ONE-DAY POST-OP, THE PATIENT RETURNED WITH CLOSED ANGLES AND HIGH PRESSURE (40MMHG). THE PERIPHERAL IRIDECTOMIES (PIS) WERE PATENT, BUT THE SURGEON PERFORMED 2 ADDITIONAL PIS AND DILATED THE PUPILS. A COUPLE …	Lens Retention + Secondary Operation	Resolved
https://www.accessdata.fda.gov/scripts/cdrh/cfdocs/cfMAUDE/Detail.CFM?MDRFOI__ID=5221692&pc=MTA	2023826-2015-01523	NA	Injury	STAAR SURGICAL COMPANY	2015-11-13	MTA	ICL (IMPLANTABLE COLLAMER LENS)	Appropriate Term/Code Not Available	Intraocular Pressure Increased; No Code Available	P030016	NA	1	Event Description: THE REPORTER INDICATED THE SURGEON IMPLANTED A 13.2MM MICL13.2 IMPLANTABLE COLLAMER LENS, -10.5 DIOPTER, IN THE PATIENT'S LEFT EYE (OS) ON (B)(6) 2015. THE PATIENT WAS BROUGHT BACK TO SURGERY DUE TO ELEVATED INTRAOCULAR PRESSURE AND HAD A SECONDARY PROCEDURE TO CREATE A NEW PERIPHERAL IRIDOTOMY BUILT IT WAS NOT SUCCESSFUL. THE LENS WAS EXPLANTED ON (B)(6) 2015 DUE TO ELEVATED I…	Lens Exchange	Not_Resolved
https://www.accessdata.fda.gov/scripts/cdrh/cfdocs/cfMAUDE/Detail.CFM?MDRFOI__ID=5596422&pc=MTA	2023826-2016-00508	NA	Injury	STAAR SURGICAL COMPANY	2016-04-21	MTA	ICL (IMPLANTABLE COLLAMER LENS)	Appropriate Term/Code Not Available	Intraocular Pressure Increased; No Code Available	P030016	NA	1	Event Description: THE REPORTER STATED THE SURGEON IMPLANTED A 13.7MM MICL13.7 IMPLANTABLE COLLAMER LENS, -14.5 DIOPTER, IN THE PATIENT'S EYE ON (B)(6) 2016. THE LENS WAS EXPLANTED ON (B)(6) 2016 DUE TO A PRESSURE SPIKE. THE LENS WAS EXCHANGED FOR A SHORTER LENS. ADDITIONAL INFORMATION HAS BEEN REQUESTED BUT NONE HAS BEEN FORTHCOMING. IF ADDITIONAL INFORMATION IS RECEIVED, A SUPPLEMENTAL MEDWATCH…	Lens Exchange	Unknown
https://www.accessdata.fda.gov/scripts/cdrh/cfdocs/cfMAUDE/Detail.CFM?MDRFOI__ID=5686518&pc=MTA	2023826-2016-00770	NA	Injury	STAAR SURGICAL COMPANY	2016-05-27	MTA	ICL (IMPLANTABLE COLLAMER LENS)	Appropriate Term/Code Not Available	Intraocular Pressure Increased; No Code Available	P030016	NA	1	Event Description: THE REPORTER INDICATED THE SURGEON IMPLANTED MICL IMPLANTABLE COLLAMER LENSES IN BOTH EYES AND THE PATIENT EXPERIENCED ELEVATED INTRAOCULAR PRESSURE. THERE WAS AN ANTERIOR CHAMBER REACTION IN THE LEFT EYE AND THE PUPIL IS PERMANENTLY DILATED. THE PATIENT WAS ADMINISTERED MEDICATION FOR THE PRESSURE. THE REPORTER INDICATED TO DATE, THE LEFT EYE IS STILL DILATED BUT THE PRESSURE …	Lens Retention	Unknown
https://www.accessdata.fda.gov/scripts/cdrh/cfdocs/cfMAUDE/Detail.CFM?MDRFOI__ID=5686526&pc=MTA	2023826-2016-00771	NA	Injury	STAAR SURGICAL COMPANY	2016-05-27	MTA	ICL (IMPLANTABLE COLLAMER LENS)	Appropriate Term/Code Not Available	Intraocular Pressure Increased; No Code Available	P030016	NA	1	Event Description: THE REPORTER INDICATED THE SURGEON IMPLANTED MICL IMPLANTABLE COLLAMER LENSES IN BOTH EYES AND THE PATIENT EXPERIENCED ELEVATED INTRAOCULAR PRESSURE. THERE WAS AN ANTERIOR CHAMBER REACTION IN THE LEFT EYE AND THE PUPIL IS PERMANENTLY DILATED. THE PATIENT WAS ADMINISTERED MEDICATION FOR THE PRESSURE. THE REPORTER INDICATED TO DATE, THE LEFT EYE IS STILL DILATED BUT THE PRESSURE …	Lens Retention	Unknown
https://www.accessdata.fda.gov/scripts/cdrh/cfdocs/cfMAUDE/Detail.CFM?MDRFOI__ID=6498299&pc=MTA	2023826-2017-00548	2016-05-21	Injury	STAAR SURGICAL COMPANY	2017-04-17	MTA	IMPLANTABLE COLLAMER LENS (ICL)	Device Operates Differently Than Expected	Intraocular Pressure Increased; No Code Available	NA	NA	1	Event Description: THE REPORTER INDICATED THAT THE SURGEON IMPLANTED A 12.6 MM VICMO12.6 IMPLANTABLE COLLAMER LENS, -16.5 DIOPTER, INTO THE PATIENT'S RIGHT EYE (OD) ON (B)(6) 2016. ON (B)(6) 2016, THE LENS WAS EXPLANTED DUE TO ELEVATED IOP (WITHOUT PUPIL BLOCK AND ANGLE CLOSURE). AFTER EXPLANT, IOP RETURNED TO NORMAL LEVEL. TO DATE, THE SURGEON DOES NOT PLAN TO EXCHANGE THE LENS. THE SURGEON STAT…	Lens Extraction	Resolved
https://www.accessdata.fda.gov/scripts/cdrh/cfdocs/cfMAUDE/Detail.CFM?MDRFOI__ID=6505320&pc=MTA	2023826-2017-00549	2016-05-21	Injury	STAAR SURGICAL COMPANY	2017-04-19	MTA	IMPLANTABLE COLLAMER LENS (ICL)	Device Operates Differently Than Expected	Intraocular Pressure Increased; No Code Available	NA	NA	1	Event Description: THE REPORTER INDICATED THAT THE SURGEON IMPLANTED A 12.6MM VICMO12.6 IMPLANTABLE COLLAMER LENS, -16.0 DIOPTER, INTO THE PATIENT'S LEFT EYE (OS) ON (B)(6) 2016. ON (B)(6) 2016, THE LENS WAS EXPLANTED DUE TO ELEVATED IOP (WITHOUT PUPIL BLOCK AND ANGLE CLOSURE). THE SURGEON STATED THAT EVEN THOUGH THE VAULT VALUE WAS NORMAL AFTER IMPLANT, THE IOP HAD A HIGH VALUE. AFTER EXPLANT, I…	Lens Extraction	Resolved
https://www.accessdata.fda.gov/scripts/cdrh/cfdocs/cfMAUDE/Detail.CFM?MDRFOI__ID=6801085&pc=MTA	2023826-2017-01285	2016-07-25	Injury	STAAR SURGICAL COMPANY	2017-08-17	MTA	IMPLANTABLE COLLAMER LENS	Device Operates Differently Than Expected	Intraocular Pressure Increased; No Code Available	N/A	NA	1	Event Description: THE REPORTED INDICATED THAT A VICMO12.1 IMPLANTABLE COLLAMER LENS WITH A -9.50 DIOPTER WAS IMPLANTED ON (B)(6)2017 IN THE LEFT EYE (OS). THE PATIENT WAS (B)(6) YEARS OLD AT THE TIME (THIS MODEL IS CONTRAINDICATED FOR USE IN PATIENTS UNDER THE AGE OF 21) THE PATIENT'S IOP ELEVATED WITHOUT PUPIL BLOCK OR ANGLE CLOSURE, SO THE SURGEON EXPLANTED THE LENS ON (B)(6)2017. THIS IS THE …	Lens Extraction	Unknown
https://www.accessdata.fda.gov/scripts/cdrh/cfdocs/cfMAUDE/Detail.CFM?MDRFOI__ID=6801118&pc=MTA	2023826-2017-01286	2016-07-25	Injury	STAAR SURGICAL COMPANY	2017-08-17	MTA	IMPLANTABLE COLLAMER LENS	Device Operates Differently Than Expected	Intraocular Pressure Increased; No Code Available	N/A	NA	1	Event Description: THE REPORTED INDICATED THAT A VICMO12.1 IMPLANTABLE COLLAMER LENS WITH A -9.50 DIOPTER WAS IMPLANTED ON (B)(6)-2017 IN THE RIGHT EYE (OD). THE PATIENT WAS (B)(6) YEARS OLD AT THE TIME (THIS MODEL IS CONTRAINDICATED FOR USE IN PATIENTS UNDER THE AGE OF 21) THE PATIENT'S IOP ELEVATED WITHOUT PUPIL BLOCK OR ANGLE CLOSURE, SO THE SURGEON EXPLANTED THE LENS ON (B)(6)2017. THIS IS TH…	Lens Extraction	Resolved
https://www.accessdata.fda.gov/scripts/cdrh/cfdocs/cfMAUDE/Detail.CFM?MDRFOI__ID=6447102&pc=MTA	2023826-2017-00514	2016-12-30	Injury	STAAR SURGICAL COMPANY	2017-03-30	MTA	IMPLANTABLE COLLAMER LENS (ICL)	Device Operates Differently Than Expected	Intraocular Pressure Increased; No Code Available	NA	NA	1	Event Description: THE REPORTER INDICATED THAT THE SURGEON IMPLANTED A 12.1 MM VICMO12.1 IMPLANTABLE COLLAMER LENS, -13.0 DIOPTER, INTO THE PATIENT'S LEFT EYE (OS) ON (B)(6) 2016. ON (B)(6) 2017, THE LENS WAS EXPLANTED DUE TO ELEVATED IOP. AFTER EXPLANT, IOP RETURNED TO NORMAL LEVEL. TO DATE, THE SURGEON DOES NOT PLAN TO EXCHANGE THE LENS. AS OF THE DATE OF MDR SUBMISSION, THE LENS HAS BEEN RETUR…	Lens Extraction	Resolved
https://www.accessdata.fda.gov/scripts/cdrh/cfdocs/cfMAUDE/Detail.CFM?MDRFOI__ID=6430473&pc=MTA	2023826-2017-00478	2017-02-23	Injury	STAAR SURGICAL COMPANY	2017-03-23	MTA	IMPLANTABLE COLLAMER LENS (ICL)	Device Operates Differently Than Expected	Intraocular Pressure Increased; No Code Available	P030016	NA	1	Event Description: THE REPORTER STATED THAT A 13.2MM MICL13.2 IMPLANTABLE COLLAMER LENS, -11.0 DIOPTER, WAS EXPLANTED DUE TO EXTREME HIGH PRESSURE. THE LENS WAS REPLACED ON (B)(6) 2017 WITH A SHORTER LENGTH LENS. ADDITIONAL INFORMATION HAS BEEN REQUESTED BUT NONE HAS BEEN FORTHCOMING. IF ADDITIONAL INFORMATION IS RECEIVED A SUPPLEMENTAL MEDWATCH REPORT WILL BE SUBMITTED. Manufacturer Narrative: W…	Lens Exchange	Resolved
https://www.accessdata.fda.gov/scripts/cdrh/cfdocs/cfMAUDE/Detail.CFM?MDRFOI__ID=6524681&pc=MTA	2023826-2017-00625	2017-03-31	Injury	STAAR SURGICAL COMPANY	2017-04-26	MTA	IMPLANTABLE COLLAMER LENS (ICL)	Device Operates Differently Than Expected	Intraocular Pressure Increased; No Code Available	P030016	NA	1	Event Description: THE REPORTER STATED THAT A 13.2MM MICL13.2 IMPLANTABLE COLLAMER LENS, -14.0 DIOPTER, WAS EXPLANTED AND REPLACED WITH A SHORTER LENGTH LENS WITHIN THE SAME SURGERY BECAUSE IT WAS CAUSING PRESSURE. ADDITIONAL INFORMATION HAS BEEN REQUESTED BUT NONE HAS BEEN FORTHCOMING. IF ADDITIONAL INFORMATION IS RECEIVED A SUPPLEMENTAL MEDWATCH REPORT WILL BE SUBMITTED. Manufacturer Narrative:…	Lens Exchange + Secondary Operation	Unknown
https://www.accessdata.fda.gov/scripts/cdrh/cfdocs/cfMAUDE/Detail.CFM?MDRFOI__ID=6812325&pc=MTA	2023826-2017-01339	2017-07-04	Injury	STAAR SURGICAL COMPANY	2017-08-22	MTA	IMPLANTABLE COLLAMER LENS (ICL)	Device Operates Differently Than Expected	Intraocular Pressure Increased; No Code Available	P030016	NA	1	Event Description: THE REPORTER INDICATED THAT ON (B)(6) 2017 THE SURGEON IMPLANTED A 12.6MM MICL12.6 IMPLANTABLE COLLAMER LENS, DIOPTER -7.0, INTO THE PATIENT'S LEFT (OS) EYE. ON (B)(6) 2017 THE LENS WAS EXCHANGED FOR A SHORTER AND SIMILAR DIOPTER LENS DUE TO ELEVATED IOP. THE PROBLEM IS RESOLVED. Manufacturer Narrative: DATE RECEIVED BY MANUFACTUTRER IN THE INTIAL SHOULD BE (B)(4) 2017. (B)(4).…	Lens Exchange	Resolved
https://www.accessdata.fda.gov/scripts/cdrh/cfdocs/cfMAUDE/Detail.CFM?MDRFOI__ID=7050888&pc=MTA	2023826-2017-01706	2017-09-21	Injury	STAAR SURGICAL COMPANY	2017-11-21	MTA	IMPLANTABLE COLLAMER LENS (ICL)	Device Operates Differently Than Expected	Intraocular Pressure Increased; No Code Available	P030016	NA	1	Event Description: THE REPORTER INDICATED THAT THE SURGEON IMPLANTED A MICL13.2, -9.5 DIOPTER, IMPLANTABLE COLLAMER LENS IN THE PATIENT'S RIGHT EYE (OD) ON (B)(6) 2017. ON (B)(6) 2017, THE LENS WAS EXCHANGED FOR ANOTHER LENS DUE HIGH PRESSURE AND FIXED DILATED PUPIL. THE BAG WAS ALSO NEEDED TO BE REFORMED. THE PATIENT'S CURRENT CONDITION IS THAT THE EYE HAS A BIT OF EDEMA BUT IS OVERALL FINE WITH…	Lens Exchange	Resolved
https://www.accessdata.fda.gov/scripts/cdrh/cfdocs/cfMAUDE/Detail.CFM?MDRFOI__ID=7356133&pc=MTA	2023826-2018-00438	2018-01-29	Injury	STAAR SURGICAL COMPANY	2018-03-20	MTA	IMPLANTABLE COLLAMER LENS (ICL)	Device Operates Differently Than Expected	Intraocular Pressure Increased; No Code Available	NA	NA	1	Event Description: THE REPORTER INDICATED THAT THE SURGEON IMPLANTED AN IMPLANTABLE COLLAMER LENS (ICL) INTO THE PATIENT'S RIGHT EYE (OD). REPORTEDLY, "THERE IS AN IOP PROBLEM" AND THE PATIENT "IS ON MEDICATION FOR IT." ATTEMPTS TO OBTAIN ADDITIONAL INFORMATION HAVE NOT BEEN SUCCESSFUL. Manufacturer Narrative: ADDITIONAL INFORMATION RECEIVED: REPORTEDLY, THE ICL THAT THE SURGEON IMPLANTED WAS A 1…	Lens Retention	Resolved
https://www.accessdata.fda.gov/scripts/cdrh/cfdocs/cfMAUDE/Detail.CFM?MDRFOI__ID=6224163&pc=MTA	2023826-2017-00004	2016-11-10	Injury	STAAR SURGICAL COMPANY	2017-01-04	MTA	INTRAOCULAR LENS	Device Operates Differently Than Expected; Adverse Event Without Identified Device or Use Problem	Intraocular Pressure Increased; No Code Available	NA	NA	1	Event Description: THE REPORTER INDICATED THAT THE SURGEON IMPLANTED A 12.6MM VICMO12.6 IMPLANTABLE COLLAMER LENS, -14.5 DIOPTER, INTO THE PATIENT'S RIGHT EYE (OD) ON (B)(6) 2016. ON (B)(6) 2016 THE LENS WAS EXPLANTED DUE TO ELEVATED IOP (WITHOUT PUPIL BLOCK AND ANGLE CLOSURE). AS OF THE DATE OF MDR REPORTING, THE LENS HAS NOT BEEN RETURNED AND THEREFORE NO PRODUCT EVALUATION HAS OCCURRED. Manufa…	Lens Extraction	Unknown
https://www.accessdata.fda.gov/scripts/cdrh/cfdocs/cfMAUDE/Detail.CFM?MDRFOI__ID=6978364&pc=MTA	2023826-2017-01627	2017-02-03	Injury	STAAR SURGICAL COMPANY	2017-10-25	MTA	IMPLANTABLE COLLAMER LENS (ICL)	Device Operates Differently Than Expected; Adverse Event Without Identified Device or Use Problem	Intraocular Pressure Increased; No Code Available	NA	NA	1	Event Description: THE REPORTER INDICATED THE SURGEON IMPLANTED A 13.2MM VICM5_13.2 IMPLANTABLE COLLAMER LENS, -09.50 DIOPTER, IN THE PATIENT'S RIGHT EYE (OD), ON (B)(6) 2017. THE LENS WAS EXPLANTED ON (B)(6) 2017 DUE TO ELEVATED INTRAOCULAR PRESSURE. THE PATIENT WAS PRESCRIBED MEDICATION FOR THE PRESSURE. THE LENS WAS NOT EXCHANGED FOR ANOTHER LENS. THE PATIENT'S POST-OP BEST-CORRECTED VISUAL AC…	Lens Extraction	Resolved
https://www.accessdata.fda.gov/scripts/cdrh/cfdocs/cfMAUDE/Detail.CFM?MDRFOI__ID=6978385&pc=MTA	2023826-2017-01628	2017-02-03	Injury	STAAR SURGICAL COMPANY	2017-10-25	MTA	IMPLANTABLE COLLAMER LENS (ICL)	Device Operates Differently Than Expected; Adverse Event Without Identified Device or Use Problem	Intraocular Pressure Increased; No Code Available	NA	NA	1	Event Description: THE REPORTER INDICATED THE SURGEON IMPLANTED A 13.2MM VICM5_13.2 IMPLANTABLE COLLAMER LENS, -07.00 DIOPTER, IN THE PATIENT'S LEFT EYE (OS), ON (B)(6) 2017. THE LENS WAS EXPLANTED ON (B)(6) 2017 DUE TO ELEVATED INTRAOCULAR PRESSURE. A SUTURE WAS REQUIRED. THE PATIENT WAS PRESCRIBED MEDICATION FOR THE PRESSURE. THE LENS WAS NOT EXCHANGED FOR ANOTHER LENS. THE PATIENT'S POST-OP BE…	Lens Extraction	Resolved
https://www.accessdata.fda.gov/scripts/cdrh/cfdocs/cfMAUDE/Detail.CFM?MDRFOI__ID=5975346&pc=MTA	2023826-2016-01316	2016-07-19	Injury	STAAR SURGICAL COMPANY	2016-09-23	MTA	ICL (IMPLANTABLE COLLAMER LENS)	Device Operates Differently Than Expected; Appropriate Term/Code Not Available	Intraocular Pressure Increased; No Code Available	NA	NA	1	Event Description: THE REPORTER INDICATED THE SURGEON IMPLANTED A 12.6MM VICMO12.6 IMPLANTABLE COLLAMER LENS, -12.5 DIOPTER, IN THE PATIENT'S RIGHT EYE (OD) ON (B)(6) 2016. THE LENS WAS EXPLANTED ON (B)(6) 2016 DUE TO ELEVATED INTRAOCULAR PRESSURE AND SIGNIFICANT REDUCTION OF IRIDO-CORNEAL ANGLES. THE LENS WAS EXCHANGED FOR A SHORTER LENS AND THE PROBLEM WAS RESOLVED. THE PATIENT'S POST-OP BEST-C…	Lens Exchange	Resolved
https://www.accessdata.fda.gov/scripts/cdrh/cfdocs/cfMAUDE/Detail.CFM?MDRFOI__ID=5724414&pc=MTA	2023826-2016-00793	NA	Injury	STAAR SURGICAL COMPANY	2016-06-14	MTA	ICL (IMPLANTABLE COLLAMER LENS)	Device Operates Differently Than Expected; Appropriate Term/Code Not Available	Intraocular Pressure Increased; No Code Available	N/A	NA	1	Event Description: THE REPORTER INDICATED THAT THE SURGEON IMPLANTED A 13.2MM VICMO 13.2 IMPLANTABLE COLLAMER LENS, -13.5 DIOPTER IN TO THE PATIENT'S LEFT EYE (OS) ON (B)(6) 2016. THE LENS WAS EXPLANTED ON (B)(6) 2016 DUE TO ELEVATED IOP . THE LENS WAS EXCHANGED FOR A SHORTER LENS AND THE PROBLEM WAS RESOLVED. THE PATIENT'S POST OP BEST CORRECTED VISUAL ACUITY WAS 20/20. Manufacturer Narrative: D…	Lens Exchange	Resolved
https://www.accessdata.fda.gov/scripts/cdrh/cfdocs/cfMAUDE/Detail.CFM?MDRFOI__ID=5873701&pc=MTA	2023826-2016-01061	2016-05-16	Injury	STAAR SURGICAL COMPANY	2016-08-12	MTA	ICL (IMPLANTABLE COLLAMER LENS)	Device Operates Differently Than Expected; Insufficient Information	Intraocular Pressure Increased; No Code Available	NA	NA	1	Event Description: THE REPORTER INDICATED THE SURGEON WAS UNABLE TO IMPLANT A A 13.2MM VICMO13.2 IMPLANTABLE COLLAMER LENS, -12.0 DIOPTER, INTO THE SULCUS OF THE PATIENT'S RIGHT EYE (OD) DUE TO POSITIVE VITREO PRESSURE. THE LENS WAS INSERTED BUT THE PRESSURE DISPLACED THE LENS OUT OF THE PROPER POSITION IN THE EYE. THE LENS WAS REMOVED WITHIN THE SAME SURGERY AND THERE WAS NO APPARENT INJURY. Man…	Lens Extraction	Resolved
https://www.accessdata.fda.gov/scripts/cdrh/cfdocs/cfMAUDE/Detail.CFM?MDRFOI__ID=6197215&pc=MTA	2023826-2016-01805	2016-01-28	Injury	STAAR SURGICAL COMPANY	2016-12-21	MTA	ICL (IMPLANTABLE COLLAMER LENS)	Inadequacy of Device Shape and/or Size	Intraocular Pressure Increased; No Code Available	N/A	NA	1	Event Description: THE REPORTER INDICATED THAT THE SURGEON IMPLANTED A 12.6 MM VICMO12.6 IMPLANTABLE COLLAMER LENS, -13.0 DIOPTER IN THE PATIENT'S RIGHT EYE (OD) ON (B)(6) 2016. THE LENS WAS EXPLANTED ON (B)(6) 2016 DUE TO EXCESSIVE VAULTING AND ELEVATED IOP (WITHOUT PUPIL BLOCK AND ANGLE CLOSURE). THE LENS WAS EXCHANGED FOR A SHORTER LENS AND THE PROBLEM WAS RESOLVED. THE PATIENT'S POST-OP BEST …	Lens Exchange	Resolved
https://www.accessdata.fda.gov/scripts/cdrh/cfdocs/cfMAUDE/Detail.CFM?MDRFOI__ID=6036767&pc=MTA	2023826-2016-01474	2016-02-03	Injury	STAAR SURGICAL COMPANY	2016-10-18	MTA	ICL (IMPLANTABLE COLLAMER LENS)	Inadequacy of Device Shape and/or Size	Intraocular Pressure Increased; No Code Available	NA	NA	1	Event Description: THE REPORTER INDICATED THAT THE SURGEON INSERTED A 12.6MM VICMO12.6 IMPLANTABLE COLLAMER LENS, -08.50 DIOPTER, IN THE PATIENT'S LEFT EYE ON (B)(6) 2016. THE LENS WAS EXPLANTED ON (B)(6) 2016 DUE TO EXCESSIVE VAULTING AND ELEVATED INTRAOCULAR PRESSURE (IOP). THE LENS WAS EXCHANGED FOR A SHORTER LENS AND THE PROBLEM WAS RESOLVED._x000D_ Manufacturer Narrative: ADDITIONAL INFORMAT…	Lens Exchange	Resolved
https://www.accessdata.fda.gov/scripts/cdrh/cfdocs/cfMAUDE/Detail.CFM?MDRFOI__ID=6795677&pc=MTA	2023826-2017-01319	2016-04-28	Injury	STAAR SURGICAL COMPANY AG	2017-08-15	MTA	ICL (IMPLANTABLE COLLAMER LENS)	Inadequacy of Device Shape and/or Size	Intraocular Pressure Increased; No Code Available	N/A	NA	1	Event Description: THE REPORTER INDICATED THAT THE SURGEON IMPLANTED A 12.6MM VICMO12.6 IMPLANTABLE COLLAMER LENS, -3.0 DIOPTER, IN THE PATIENT'S LEFT EYE (OS) ON (B)(6) 2015. THE PATIENT EXPERIENCED EXCESSIVE VAULT, ELEVATED IOP, SIGNIFICANT REDUCTION AND NARROWING OF IRIDO-CORNEAL ANGLES. ON (B)(6) 2016 THE LENS WAS EXCHANGED FOR A SHORTER LENS, AND THE PROBLEM WAS RESOLVED. Manufacturer Narrat…	Lens Exchange	Resolved
https://www.accessdata.fda.gov/scripts/cdrh/cfdocs/cfMAUDE/Detail.CFM?MDRFOI__ID=6209910&pc=MTA	2023826-2016-01829	2016-06-20	Injury	STAAR SURGICAL COMPANY	2016-12-28	MTA	IMPLANTABLE COLLAMER LENS (ICL)	Inadequacy of Device Shape and/or Size	Intraocular Pressure Increased; No Code Available	NA	NA	1	Event Description: THE REPORTER INDICATED THAT THE SURGEON IMPLANTED A 12.6 MM VTICMO12.6 IMPLANTABLE COLLAMER LENS, -10.00 DIOPTER, IN THE PATIENT'S RIGHT EYE (OD) ON (B)(6) 2016. ON (B)(6) 2016, THE LENS WAS EXCHANGED DUE TO EXCESSIVE VAULT. Manufacturer Narrative: THE LENS WAS EXPLANTED DUE TO EXCESSIVE VAULTING AND ELEVATED INTRAOCULAR PRESSURE (IOP). THE PATIENT UNDERWENT YAG AND THE LENS WA…	Lens Exchange + Secondary Operation	Resolved
https://www.accessdata.fda.gov/scripts/cdrh/cfdocs/cfMAUDE/Detail.CFM?MDRFOI__ID=6410776&pc=MTA	2023826-2016-01644	2016-08-05	Injury	STAAR SURGICAL COMPANY	2017-03-16	MTA	ICL (IMPLANTABLE COLLAMER LENS)	Inadequacy of Device Shape and/or Size	Intraocular Pressure Increased; No Code Available	NA	NA	1	Event Description: THE REPORTER INDICATED THE SURGEON IMPLANTED A 13.2MM VICMO13.2 IMPLANTABLE COLLAMER LENS, -13.5 DIOPTER, IN THE PATIENT'S RIGHT EYE (OD) ON (B)(6) 2016. THE LENS WAS EXPLANTED ON (B)(6) 2016 DUE TO EXCESSIVE VAULTING, SIGNIFICANT REDUCTION OF IRIDO-CORNEAL ANGLES, ANGLE CLOSURE (WITH ELEVATED IOP) AND HIGH OCULAR PRESSURE. THE LENS WAS EXCHANGED FOR A SHORTER LENS. THE PATIENT…	Lens Exchange	Resolved
https://www.accessdata.fda.gov/scripts/cdrh/cfdocs/cfMAUDE/Detail.CFM?MDRFOI__ID=5983954&pc=MTA	2023826-2016-01325	2016-08-31	Injury	STAAR SURGICAL COMPANY	2016-09-28	MTA	ICL (IMPLANTABLE COLLAMER LENS)	Inadequacy of Device Shape and/or Size	Intraocular Pressure Increased; No Code Available	P030016	NA	1	Event Description: THE REPORTER STATED THE SURGEON IMPLANTED A 13.2MM MICL13.2 IMPLANTABLE COLLAMER LENS, -12.0 DIOPTER, IN THE PATIENT'S EYE ON (B)(6) 2016. AT A POST-OP VISIT ON (B)(6) 2016, THE SURGEON NOTED AN INCREASE IN THE OCULAR PRESSURE AND LENS WAS CLOUDY. THE SURGEON ATTEMPTED TO RE-POSITION THE LENS BUT WITH NO SUCCESS. THE LENS WAS EXPLANTED AND A SHORTER LENS WAS IMPLANTED. THERE WE…	Lens Exchange	Resolved
https://www.accessdata.fda.gov/scripts/cdrh/cfdocs/cfMAUDE/Detail.CFM?MDRFOI__ID=6460525&pc=MTA	2023826-2017-00570	2016-10-01	Injury	STAAR SURGICAL COMPANY	2017-04-05	MTA	ICL (IMPLANTABLE COLLAMER LENS)	Inadequacy of Device Shape and/or Size	Intraocular Pressure Increased; No Code Available	N/A	NA	1	Event Description: THE REPORTER INDICATED THAT THE SURGEON IMPLANTED A 13.7MM VICMO13.7 IMPLANTABLE COLLAMER LENS, -8.5 DIOPTER, IN THE PATIENT'S RIGHT EYE (OD) ON (B)(6) 2016. THE PATIENT EXPERIENCED EXCESSIVE VAULTING, ELEVATED IOP. ON (B)(6) 2017, THE LENS WAS EXCHANGED FOR SHORTER LENS. THE PROBLEM WAS RESOLVED. AS OF THE DAY OF MDR SUBMISSION, THE LENS HAS BEEN RETURNED, BUT NOT YET EVALUATE…	Lens Exchange	Resolved
https://www.accessdata.fda.gov/scripts/cdrh/cfdocs/cfMAUDE/Detail.CFM?MDRFOI__ID=6460543&pc=MTA	2023826-2017-00571	2016-10-01	Injury	STAAR SURGICAL COMPANY	2017-04-05	MTA	ICL (IMPLANTABLE COLLAMER LENS)	Inadequacy of Device Shape and/or Size	Intraocular Pressure Increased; No Code Available	N/A	NA	1	Event Description: THE REPORTER INDICATED THAT THE SURGEON IMPLANTED A 13.7MM VICMO13.7 IMPLANTABLE COLLAMER LENS, -8.5 DIOPTER, IN THE PATIENT'S LEFT EYE (OS) ON (B)(6) 2016. THE PATIENT EXPERIENCED EXCESSIVE VAULTING, ELEVATED IOP. ON (B)(6) 2016, THE LENS WAS EXCHANGED FOR SHORTER LENS. THE PROBLEM WAS RESOLVED. AS OF THE DAY OF MDR SUBMISSION, THE LENS HAS BEEN RETURNED, BUT NOT YET EVALUATED…	Lens Exchange	Resolved
https://www.accessdata.fda.gov/scripts/cdrh/cfdocs/cfMAUDE/Detail.CFM?MDRFOI__ID=6224164&pc=MTA	2023826-2017-00005	2016-10-15	Injury	STAAR SURGICAL COMPANY	2017-01-04	MTA	IMPLANTABLE COLLAMER LENS (ICL)	Inadequacy of Device Shape and/or Size	Intraocular Pressure Increased; No Code Available	NA	NA	1	Event Description: THE REPORTER INDICATED THAT THE SURGEON IMPLANTED A 13.2MM VICMO13.2 IMPLANTABLE COLLAMER LENS, -7.50 DIOPTER, INTO THE PATIENT'S RIGHT EYE (OD) ON (B)(6) 2016. ON (B)(6) 2016, THE PATIENT REPORTED EXCESSIVE VAULTING AND ELEVATED IOP. ON (B)(6) 2016, THE LENS WAS EXCHANGED FOR A SHORTER LENS. THE PROBLEM WAS RESOLVED. AS OF THE DATE OF MDR SUBMISSION NO LENS EVALUATION HAS BEEN…	Lens Exchange	Resolved
https://www.accessdata.fda.gov/scripts/cdrh/cfdocs/cfMAUDE/Detail.CFM?MDRFOI__ID=6361169&pc=MTA	2023826-2017-00266	2016-10-27	Injury	STAAR SURGICAL COMPANY	2017-02-27	MTA	ICL (IMPLANTABLE COLLAMER LENS)	Inadequacy of Device Shape and/or Size	Intraocular Pressure Increased; No Code Available	N/A	NA	1	Event Description: THE REPORTER INDICATED THAT THE SURGEON IMPLANTED A 13.2MM VICMO13.2, -8.5 DIOPTER, IMPLANTABLE COLLAMER LENS IN THE PATIENT'S LEFT EYE (OS) ON (B)(6) 2016. THE LENS WAS EXPLANTED ON (B)(6) 2016 DUE TO EXCESSIVE VAULTING AND ELEVATED IOP. THE LENS WAS EXCHANGED FOR A SHORTER LENS AND THE PROBLEM WAS RESOLVED. ON (B)(6) 2016, THE PATIENT'S BEST CORRECTED VISUAL ACUITY (BCVA) WAS…	Lens Exchange	Resolved
https://www.accessdata.fda.gov/scripts/cdrh/cfdocs/cfMAUDE/Detail.CFM?MDRFOI__ID=6172497&pc=MTA	2023826-2016-01758	2016-11-05	Injury	STAAR SURGICAL COMPANY	2016-12-13	MTA	ICL (IMPLANTABLE COLLAMER LENS)	Inadequacy of Device Shape and/or Size	Intraocular Pressure Increased; No Code Available	P030016	NA	1	Event Description: THE REPORTER STATED THE SURGEON IMPLANTED A 13.2MM MICL13.2 IMPLANTABLE COLLAMER LENS, -5.5 DIOPTER, IN THE PATIENT'S LEFT EYE (OS) ON (B)(6) 2016. THE LENS WAS EXPLANTED ON (B)(6) 2016 DUE TO EXCESSIVE VAULTING AND ANGLE CLOSURE. THE PERIPHERAL IRIDOTOMIES WERE ENLARGED. THE LENS WAS EXCHANGED FOR A SHORTER LENS. Manufacturer Narrative: PATIENT INFO: FEMALE. EXPLANT DATE: (B)(…	Lens Exchange + Secondary Operation	Resolved
https://www.accessdata.fda.gov/scripts/cdrh/cfdocs/cfMAUDE/Detail.CFM?MDRFOI__ID=6172498&pc=MTA	2023826-2016-01757	2016-11-05	Injury	STAAR SURGICAL COMPANY	2016-12-13	MTA	ICL (IMPLANTABLE COLLAMER LENS)	Inadequacy of Device Shape and/or Size	Intraocular Pressure Increased; No Code Available	P030016	NA	1	Event Description: THE REPORTER STATED THE SURGEON IMPLANTED A 13.2MM MICL13.2 IMPLANTABLE COLLAMER LENS, -4.5 DIOPTER, IN THE PATIENT'S RIGHT EYE (OD) ON (B)(6) 2016. THE LENS WAS EXPLANTED ON (B)(6) 2016 DUE TO EXCESSIVE VAULTING AND ANGLE CLOSURE. THE PERIPHERAL IRIDOTOMIES WERE ENLARGED. THE LENS WAS EXCHANGED FOR A SHORTER LENS. Manufacturer Narrative: PATIENT INFO: FEMALE. EXPLANT DATE: (B)…	Lens Exchange + Secondary Operation	Resolved
https://www.accessdata.fda.gov/scripts/cdrh/cfdocs/cfMAUDE/Detail.CFM?MDRFOI__ID=6191984&pc=MTA	2023826-2016-01801	2016-11-07	Injury	STAAR SURGICAL COMPANY	2016-12-20	MTA	ICL (IMPLANTABLE COLLAMER LENS)	Inadequacy of Device Shape and/or Size	Intraocular Pressure Increased; No Code Available	N/A	NA	1	Event Description: THE REPORTER INDICATED THAT THE SURGEON IMPLANTED A 13.2 MM VICMO13.2 IMPLANTABLE COLLAMER LENS, -3.50 DIOPTER IN THE PATIENT'S LEFT EYE (OS) ON (B)(6) 2016. THE LENS WAS EXPLANTED ON (B)(6) 2016 DUE TO EXCESSIVE VAULTING, ELEVATED IOP (WITHOUT PUPIL BLOCK AND ANGLE CLOSURE) AND SIGNIFICANT REDUCTION OF IRIDO-CORNEAL ANGLES. Manufacturer Narrative: DEVICE EVALUATION: LENS WAS R…	Lens Extraction	Unknown
https://www.accessdata.fda.gov/scripts/cdrh/cfdocs/cfMAUDE/Detail.CFM?MDRFOI__ID=6281933&pc=MTA	2023826-2017-00174	2017-01-06	Injury	STAAR SURGICAL COMPANY	2017-01-26	MTA	ICL (IMPLANTABLE COLLAMER LENS)	Inadequacy of Device Shape and/or Size	Intraocular Pressure Increased; No Code Available	NA	NA	1	Event Description: THE REPORTER INDICATED THE SURGEON IMPLANTED EVO VISIAN ICL LENSES BILATERALLY IN A PATIENT AND BOTH EYES PRESENT HIGH VAULTING. THE LENSES REMAIN IMPLANTED. ADDITIONAL INFORMATION HAS BEEN REQUESTED BUT NONE HAS BEEN FORTHCOMING. IF ADDITIONAL INFORMATION IS RECEIVED, A SUPPLEMENTAL MEDWATCH REPORT WILL BE SUBMITTED. Manufacturer Narrative: ADDITIONAL INFORMATION RECEIVED: THE…	Lens Exchange	Resolved
https://www.accessdata.fda.gov/scripts/cdrh/cfdocs/cfMAUDE/Detail.CFM?MDRFOI__ID=6407568&pc=MTA	2023826-2017-00412	2017-01-16	Injury	STAAR SURGICAL COMPANY	2017-03-15	MTA	ICL (IMPLANTABLE COLLAMER LENS)	Inadequacy of Device Shape and/or Size	Intraocular Pressure Increased; No Code Available	N/A	NA	1	Event Description: THE REPORTER INDICATED THAT THE SURGEON IMPLANTED A 12.6 MM VICMO12.6 IMPLANTABLE COLLAMER LENS, -11.5 DIOPTER, IN THE PATIENT'S RIGHT EYE (OD) ON (B)(6) 2017. THE PATIENT EXPERIENCED LOW VAULT, AND ELEVATED IOP (WITHOUT PUPIL BLOCK AND ANGLE CLOSURE). ON (B)(6) 2017 THE LENS WAS EXCHANGED FOR A LONGER LENS. THE PROBLEM WAS RESOLVED. AS OF THE DATE OF MDR SUBMISSION, THE LENS H…	Lens Exchange	Resolved
https://www.accessdata.fda.gov/scripts/cdrh/cfdocs/cfMAUDE/Detail.CFM?MDRFOI__ID=6312700&pc=MTA	2023826-2017-00228	2017-01-17	Injury	STAAR SURGICAL COMPANY	2017-02-08	MTA	IMPLANTABLE COLLAMER LENS (ICL)	Inadequacy of Device Shape and/or Size	Intraocular Pressure Increased; No Code Available	P030016	NA	1	Event Description: THE REPORTER STATED THE SURGEON IMPLANTED A MICL12.6 IMPLANTABLE COLLAMER LENS, -10.5 DIOPTER ON (B)(6) 2017. THE LENS WAS EXPLANTED ON (B)(6) 2017 DUE TO EXCESSIVE VAULTING AND ELEVATED INTRAOCULAR PRESSURE. THE LENS WAS EXCHANGED FOR A SHORTER LENS. THE REPORTER STATED THE CAUSE WAS UNKNOWN. Manufacturer Narrative: DEVICE EVALUATION: LENS WAS RETURNED IN LIQUID, IN A LENS VIA…	Lens Exchange	Resolved
https://www.accessdata.fda.gov/scripts/cdrh/cfdocs/cfMAUDE/Detail.CFM?MDRFOI__ID=6439068&pc=MTA	2023826-2017-00506	2017-01-23	Injury	STAAR SURGICAL COMPANY	2017-03-28	MTA	ICL (IMPLANTABLE COLLAMER LENS)	Inadequacy of Device Shape and/or Size	Intraocular Pressure Increased; No Code Available	N/A	NA	1	Event Description: THE REPORTER INDICATED THAT THE SURGEON IMPLANTED A 13.2MM VICMO13.2 IMPLANTABLE COLLAMER LENS, -10.5 DIOPTER, IN THE PATIENT'S RIGHT EYE (OD) ON (B)(6) 2017. THE PATIENT EXPERIENCED EXCESSIVE VAULTING, ELEVATED IOP. ON (B)(6) 2017 THE LENS WAS EXCHANGED FOR A SHORTER LENS. THE PROBLEM WAS RESOLVED. AT THE DATE OF MDR SUBMISSION, THE LENS HAS BEEN RETURNED, BUT NOT YET EVALUATE…	Lens Exchange	Resolved
https://www.accessdata.fda.gov/scripts/cdrh/cfdocs/cfMAUDE/Detail.CFM?MDRFOI__ID=6424135&pc=MTA	2023826-2017-00454	2017-01-25	Injury	STAAR SURGICAL COMPANY	2017-03-22	MTA	ICL (IMPLANTABLE COLLAMER LENS)	Inadequacy of Device Shape and/or Size	Intraocular Pressure Increased; No Code Available	N/A	NA	1	Event Description: THE REPORTER INDICATED THAT THE SURGEON IMPLANTED A 12.6 MM VTICM5_12.6 IMPLANTABLE COLLAMER LENS, -5.0 DIOPTER, IN THE PATIENT'S LEFT EYE (OS) ON (B)(6) 2017. THE PATIENT EXPERIENCED LOW VAULT, ELEVATED IOP, AND HAD ADDITIONAL REFRACTIVE TREATMENT. THE LENS WAS EXPLANTED. AS OF THE DATE OF MDR SUBMISSION, THE LENS HAS BEEN RETURNED, BUT NOT YET EVALUATED. Manufacturer Narrativ…	Lens Extraction	Unknown
https://www.accessdata.fda.gov/scripts/cdrh/cfdocs/cfMAUDE/Detail.CFM?MDRFOI__ID=6389631&pc=MTA	2023826-2017-00348	2017-02-07	Injury	STAAR SURGICAL COMPANY	2017-03-08	MTA	IMPLANTABLE COLLAMER LENS (ICL)	Inadequacy of Device Shape and/or Size	Intraocular Pressure Increased; No Code Available	P030016	NA	1	Event Description: THE REPORTER STATED THAT A 13.2MM MICL13.2 IMPLANTABLE COLLAMER LENS, -16.0 DIOPTER, WAS IMPLANTED ON (B)(6) 2017 AND EXPLANTED ON (B)(6) 2017 DUE TO EXCESSIVE VAULTING. THE REPORTER INDICATED THAT THERE WAS NO PATIENT INJURY AND THE EVENT WAS NOT DEVICE RELATED BUT THE EXACT CAUSE WAS UNKNOWN. Manufacturer Narrative: DEVICE EVALUATION: LENS WAS RETURNED STUCK INSIDE CARTRIDGE.…	Lens Extraction	Resolved
https://www.accessdata.fda.gov/scripts/cdrh/cfdocs/cfMAUDE/Detail.CFM?MDRFOI__ID=6527418&pc=MTA	2023826-2017-00701	2017-03-29	Injury	STAAR SURGICAL COMPANY	2017-04-27	MTA	ICL (IMPLANTABLE COLLAMER LENS)	Inadequacy of Device Shape and/or Size	Intraocular Pressure Increased; No Code Available	N/A	NA	1	Event Description: THE REPORTER INDICATED THAT THE SURGEON IMPLANTED A 12.6MM VICM5_12.6 IMPLANTABLE COLLAMER LENS, -14 DIOPTER, IN THE PATIENT'S LEFT EYE (OS) ON (B)(6) 2017. ACCORDING TO THE SURGEON THE PATIENT EXPERIENCED EXCESSIVE VAULTING BECAUSE THE LENS WAS IMPLANTED IN A "PSEUDO PHAKIC EYE". THE PATIENT ALSO EXPERIENCED ELEVATED IOP. THE SHORTER LENS WAS ALREADY ORDERED AND SCHEDULED TO E…	Lens Exchange	Resolved
https://www.accessdata.fda.gov/scripts/cdrh/cfdocs/cfMAUDE/Detail.CFM?MDRFOI__ID=6579894&pc=MTA	2023826-2017-00860	2017-04-11	Injury	STAAR SURGICAL COMPANY	2017-05-19	MTA	IMPLANTABLE COLLAMER LENS (ICL)	Inadequacy of Device Shape and/or Size	Intraocular Pressure Increased; No Code Available	N/A	NA	1	Event Description: THE REPORTER INDICATED THAT THE SURGEON IMPLANTED A 13.2MM VICMO13.2, DIOPTER -18.00 IMPLANTABLE COLLAMER LENS, INTO THE PATIENT'S LEFT EYE (OS) ON (B)(6) 2017. ON (B)(6) 2017 THE LENS WAS EXCHANGED FOR A SHORTER LENS DUE TO THE PATIENT EXPERIENCING EXCESSIVE VAULT, ELEVATED IOP, AND SIGNIFICANT REDUCTION OF IRIDO-CORNEAL ANGLES. THE PROBLEM WAS RESOLVED. AS OF THE DATE OF MDR …	Lens Exchange	Resolved
https://www.accessdata.fda.gov/scripts/cdrh/cfdocs/cfMAUDE/Detail.CFM?MDRFOI__ID=6609924&pc=MTA	2023826-2017-00921	2017-04-11	Injury	STAAR SURGICAL COMPANY	2017-06-02	MTA	IMPLANTABLE COLLAMER LENS (ICL)	Inadequacy of Device Shape and/or Size	Intraocular Pressure Increased; No Code Available	NA	NA	1	Event Description: THE REPORTER INDICATED THAT THE SURGEON IMPLANTED A 13.2MM VICMO13.2 IMPLANTABLE COLLAMER LENS, -9.0 DIOPTER, INTO THE PATIENT'S LEFT EYE (OS) ON (B)(6) 2016. ON (B)(6) 2017, THE LENS WAS EXCHANGED WITH A SHORTER AND SIMILAR DIOPTER LENS, DUE TO EXCESSIVE VAULT, ELEVATED IOP, SIGNIFICANT REDUCTION OF IRIDO-CORNEAL ANGLES, AND PIGMENT DISPERSION. THE PROBLEM WAS RESOLVED. AS OF …	Lens Exchange	Resolved
https://www.accessdata.fda.gov/scripts/cdrh/cfdocs/cfMAUDE/Detail.CFM?MDRFOI__ID=6565217&pc=MTA	2023826-2017-00812	2017-04-14	Injury	STAAR SURGICAL COMPANY	2017-05-12	MTA	IMPLANTABLE COLLAMER LENS (ICL)	Inadequacy of Device Shape and/or Size	Intraocular Pressure Increased; No Code Available	P030016	NA	1	Event Description: THE REPORTER INDICATED THE SURGEON IMPLANTED A 13.7MM MICL13.7 IMPLANTABLE COLLAMER LENS, -8.5 DIOPTER, IN THE PATIENT'S LEFT EYE (OS), ON (B)(6) 2017. THE LENS WAS EXPLANTED ON (B)(6) 2017 DUE TO EXCESSIVE VAULTING, CLOSED ANGLE AND SHALLOW ANTERIOR CHAMBER. THE PRESSURE WAS 34MMHG BUT WAS BROUGHT DOWN TO NORMAL WITH DIAMOX. THE LENS WAS EXCHANGED FOR A SHORTER LENS. ADDITIONA…	Lens Exchange	Resolved
https://www.accessdata.fda.gov/scripts/cdrh/cfdocs/cfMAUDE/Detail.CFM?MDRFOI__ID=6565218&pc=MTA	2023826-2017-00811	2017-04-14	Injury	STAAR SURGICAL COMPANY	2017-05-12	MTA	IMPLANTABLE COLLAMER LENS (ICL)	Inadequacy of Device Shape and/or Size	Intraocular Pressure Increased; No Code Available	P030016	NA	1	Event Description: THE REPORTER INDICATED THE SURGEON IMPLANTED A 13.7MM MICL13.7 IMPLANTABLE COLLAMER LENS, -7.0 DIOPTER, IN THE PATIENT'S RIGHT EYE (OD), ON (B)(6) 2017. THE LENS WAS EXPLANTED ON (B)(6) 2017 DUE TO EXCESSIVE VAULTING, CLOSED ANGLE AND SHALLOW ANTERIOR CHAMBER. THE PRESSURE WAS 34MMHG BUT WAS BROUGHT DOWN TO NORMAL WITH DIAMOX. THE LENS WAS EXCHANGED FOR A SHORTER LENS. ADDITION…	Lens Exchange	Resolved
https://www.accessdata.fda.gov/scripts/cdrh/cfdocs/cfMAUDE/Detail.CFM?MDRFOI__ID=6645493&pc=MTA	2023826-2017-00983	2017-05-16	Injury	STAAR SURGICAL COMPANY	2017-06-15	MTA	IMPLANTABLE COLLAMER LENS (ICL)	Inadequacy of Device Shape and/or Size	Intraocular Pressure Increased; No Code Available	P030016	NA	1	Event Description: THE REPORTER INDICATED THE SURGEON IMPLANTED A 12.6MM MICL12.6 IMPLANTABLE COLLAMER LENS, -5.5 DIOPTER, IN THE PATIENT'S LEFT EYE (OS) ON (B)(6) 2017. THE REPORTER INDICATED AT THE INITIAL SURGERY THE PATIENT HAD SLIGHT IRIS PROLAPSE, WHICH WAS MANAGED AT THE TIME. AT ONE DAY POST-OP, THE PATIENT'S INTRAOCULAR PRESSURE WAS HIGH, WITH SHALLOW CHAMBER AND ELEVATED VAULT. THE PATI…	Lens Exchange	Resolved
https://www.accessdata.fda.gov/scripts/cdrh/cfdocs/cfMAUDE/Detail.CFM?MDRFOI__ID=6712101&pc=MTA	2023826-2017-01186	2017-06-06	Injury	STAAR SURGICAL COMPANY	2017-07-13	MTA	IMPLANTABLE COLLAMER LENS (ICL)	Inadequacy of Device Shape and/or Size	Intraocular Pressure Increased; No Code Available	NA	NA	1	Event Description: THE REPORTER INDICATED THAT THE SURGEON IMPLANTED A 12.6MM VICMO12.6 IMPLANTABLE COLLAMER LENS, -12.0 DIOPTER, INTO THE PATIENT'S LEFT EYE (OS) ON (B)(6) 2017. ON (B)(6) 2017, THE LENS WAS EXPLANTED DUE TO EXCESSIVE VAULT AND ELEVATED IOP. AS OF THE DATE OF MDR SUBMISSION, THE LENS HAS NOT BEEN RETURNED FOR EVALUATION. THERE ARE NO PLANS TO EXCHANGE THE LENS. Manufacturer Narra…	Lens Extraction	Unknown
https://www.accessdata.fda.gov/scripts/cdrh/cfdocs/cfMAUDE/Detail.CFM?MDRFOI__ID=6728124&pc=MTA	2023826-2017-01213	2017-06-20	Injury	STAAR SURGICAL COMPANY	2017-07-20	MTA	IMPLANTABLE COLLAMER LENS (ICL)	Inadequacy of Device Shape and/or Size	Intraocular Pressure Increased; No Code Available	P030016	NA	1	Event Description: THE REPORTER STATED THAT THE SURGEON EXPLANTED A 13.2 MM MICL13.2 IMPLANTABLE COLLAMER LENS ,-5.0 DIOPTER, THAT WAS IMPLANTED LAST YEAR AND EXCHANGED IT FOR A SHORTER LENGTH LENS. THE REPORTER STATED THAT THE LENS WAS BEING REPLACED DUE TO IT BEING BIG, PROGRESSIVE ANTERIOR SYNECHIAE FROM HIGH VAULT, NARROWING OF THE ANGLE, ANGLE CLOSURE, AND SHALLOWING OF THE ACD. ADDITIONAL S…	Lens Exchange + Secondary Operation	Resolved
https://www.accessdata.fda.gov/scripts/cdrh/cfdocs/cfMAUDE/Detail.CFM?MDRFOI__ID=6767795&pc=MTA	2023826-2017-01250	2017-07-06	Injury	STAAR SURGICAL COMPANY	2017-08-04	MTA	IMPLANTABLE COLLAMER LENS (ICL)	Inadequacy of Device Shape and/or Size	Intraocular Pressure Increased; No Code Available	P030016	NA	1	Event Description: THE REPORTER STATED THE SURGEON IMPLANTED A 13.2MM MICL13.2 IMPLANTABLE COLLAMER LENS, -12.5 DIOPTER. IN THE PATIENT'S LEFT EYE (OS) ON (B)(6) 2017. THE LENS HAD A HIGH VAULT AND DUE TO CONCERNS OVER ANGLE CLOSURE, THE LENS WAS EXPLANTED ON (B)(6) 2017. THE PATIENT EXPERIENCED ELEVATED INTRAOCULAR PRESSURE AND NARROWING OF THE ANGLE. THE LENS WAS EXCHANGED FOR A SHORTER LENS AN…	Lens Exchange	Resolved
https://www.accessdata.fda.gov/scripts/cdrh/cfdocs/cfMAUDE/Detail.CFM?MDRFOI__ID=6890291&pc=MTA	2023826-2017-01469	2017-07-13	Injury	STAAR SURGICAL COMPANY	2017-09-25	MTA	IMPLANTABLE COLLAMER LENS (ICL)	Inadequacy of Device Shape and/or Size	Intraocular Pressure Increased; No Code Available	N/A	NA	1	Event Description: THE REPORTER INDICATED THAT THE SURGEON IMPLANTED A 13.2 MM VICMO13.2, -15.50 DIOPTER, IMPLANTABLE COLLAMER LENS IN THE PATIENT'S LEFT EYE (OS) ON THE MORNING OF (B)(6) 2017. EXCESSIVE VAULTING AND HIGH IOP WAS NOTICED AND WAS EXPLANTED LATER THAT EVENING. THE PATIENT'S POST-OP BCVA WAS 20/40. Manufacturer Narrative: DEVICE EVALUATION - THE LENS WAS RETURNED DRY, IN A LENS CASE…	Lens Extraction	Unknown
https://www.accessdata.fda.gov/scripts/cdrh/cfdocs/cfMAUDE/Detail.CFM?MDRFOI__ID=6818689&pc=MTA	2023826-2017-01323	2017-07-26	Injury	STAAR SURGICAL COMPANY	2017-08-24	MTA	IMPLANTABLE COLLAMER LENS (ICL)	Inadequacy of Device Shape and/or Size	Intraocular Pressure Increased; No Code Available	N/A	NA	1	Event Description: THE REPORTER INDICATED THAT THE SURGEON IMPLANTED A MICL13.7, -16.0 DIOPTER, IMPLANTABLE COLLAMER LENS IN THE PATIENT'S LEFT EYE (OS) ON (B)(6) 2017. THE LENS WAS EXPLANTED ON (B)(6) 2017 DUE TO INCORRECT SIZING. THE LENS WAS EXCHANGED FOR ANOTHER LENS. Manufacturer Narrative: THE LENS WAS EXCHANGED FOR A SHORTER LENS ON (B)(6) 2017 DUE TO EXCESSIVE VAULT, ELEVATED (INTRAOCULAR…	Lens Exchange	Resolved
https://www.accessdata.fda.gov/scripts/cdrh/cfdocs/cfMAUDE/Detail.CFM?MDRFOI__ID=6818692&pc=MTA	2023826-2017-01324	2017-07-26	Injury	STAAR SURGICAL COMPANY	2017-08-24	MTA	IMPLANTABLE COLLAMER LENS (ICL)	Inadequacy of Device Shape and/or Size	Intraocular Pressure Increased; No Code Available	P030016	NA	1	Event Description: THE REPORTER INDICATED THAT THE SURGEON IMPLANTED A MICL13.7, -15.5 DIOPTER, IMPLANTABLE COLLAMER LENS IN THE PATIENT'S RIGHT EYE (OD) ON (B)(6) 2017. THE LENS WAS EXPLANTED ON (B)(6) 2017 DUE TO INCORRECT SIZING. THE LENS WAS EXCHANGED FOR ANOTHER LENS. Manufacturer Narrative: FEMALE. THE LENS WAS EXCHANGED FOR A SHORTER LENS ON (B)(6) 2017 DUE TO EXCESSIVE VAULTING, ELEVATED …	Lens Exchange	Resolved
https://www.accessdata.fda.gov/scripts/cdrh/cfdocs/cfMAUDE/Detail.CFM?MDRFOI__ID=7069472&pc=MTA	2023826-2017-01802	2017-08-17	Injury	STAAR SURGICAL COMPANY	2017-11-29	MTA	IMPLANTABLE COLLAMER LENS (ICL)	Inadequacy of Device Shape and/or Size	Intraocular Pressure Increased; No Code Available	NA	NA	1	Event Description: THE REPORTER INDICATED THE SURGEON IMPLANTED A 13.7MM VICM5_13.7 IMPLANTABLE COLLAMER LENS, -09.00 DIOPTER, IN THE PATIENT'S LEFT EYE (OS), ON (B)(6) 2017. THE LENS WAS EXPLANTED ON (B)(6) 2017 DUE TO EXCESSIVE VAULTING AND ANGLE CLOSURE, WITH ELEVATED INTRAOCULAR PRESSURE. THE LENS WAS EXCHANGED FOR A SHORTER LENS AND THE PROBLEM WAS RESOLVED. THE PATIENT'S POST-OP BEST-CORREC…	Lens Exchange	Resolved
https://www.accessdata.fda.gov/scripts/cdrh/cfdocs/cfMAUDE/Detail.CFM?MDRFOI__ID=6873954&pc=MTA	2023826-2017-01448	2017-08-18	Injury	STAAR SURGICAL COMPANY	2017-09-18	MTA	IMPLANTABLE COLLAMER LENS (ICL)	Inadequacy of Device Shape and/or Size	Intraocular Pressure Increased; No Code Available	N/A	NA	1	Event Description: THE REPORTER INDICATED THAT THE SURGERY IMPLANTED A 13.7 MM VICMO13.7, -17.0 DIOPTER, IMPLANTABLE COLLAMER LENS IN THE PATIENT'S RIGHT EYE (OD) ON (B)(6) 2017. EXCESSIVE VAULTING, ELEVATED IOP, AND SIGNIFICANT REDUCTION OF IRIDO-CORNEAL ANGLES WAS NOTICED. THE SURGEON DECIDED TO OBSERVE THE PATIENT AS THE PATIENT IS ASYMPTOMATIC AND IS HAPPY WITH VISUAL ACUITY. ON (B)(6) 2017, …	Lens Retention	Resolved
https://www.accessdata.fda.gov/scripts/cdrh/cfdocs/cfMAUDE/Detail.CFM?MDRFOI__ID=6920137&pc=MTA	2023826-2017-01540	2017-08-24	Injury	STAAR SURGICAL COMPANY	2017-10-06	MTA	IMPLANTABLE COLLAMER LENS (ICL)	Inadequacy of Device Shape and/or Size	Intraocular Pressure Increased; No Code Available	P030016	NA	1	Event Description: THE REPORTER INDICATED THE SURGEON IMPLANTED A 13.7MM MICL13.7 IMPLANTABLE COLLAMER LENS, -10.0 DIOPTER, IN THE PATIENT'S RIGHT EYE (OD) ON (B)(6) 2017. THE LENS WAS EXPLANTED ON (B)(6) 2017 DUE TO EXCESSIVE VAULTING, ELEVATED INTRAOCULAR PRESSURE (IOP), NARROWING OF THE ANGLE, SHALLOWING OF THE ANTERIOR CHAMBER DEPTH (ACD) AND ACUTE ANGLE CLOSURE. THE PERIPHERAL IRIDECTOMIES W…	Lens Exchange + Secondary Operation	Resolved
https://www.accessdata.fda.gov/scripts/cdrh/cfdocs/cfMAUDE/Detail.CFM?MDRFOI__ID=7050133&pc=MTA	2023826-2017-01769	2017-10-18	Injury	STAAR SURGICAL COMPANY	2017-11-21	MTA	IMPLANTABLE COLLAMER LENS (ICL)	Inadequacy of Device Shape and/or Size	Intraocular Pressure Increased; No Code Available	NA	NA	1	Event Description: THE REPORTER INDICATED THAT THE SURGEON IMPLANTED A 13.2MM VICMO13.2 IMPLANTABLE COLLAMER LENS, -14.0 DIOPTER, INTO THE PATIENT'S LEFT EYE (OS) ON (B)(6) 2017. ON (B)(6) 2017 THE LENS WAS EXCHANGED WITH A SHORTER LENS DUE TO EXCESSIVE VAULT AND ELEVATED IOP. THE PROBLEM WAS RESOLVED. Manufacturer Narrative: PRODUCT EVALUATION FOUND LENS RETURNED IN A MICRO CENTRIFUGE VIAL WITH …	Lens Exchange	Resolved
https://www.accessdata.fda.gov/scripts/cdrh/cfdocs/cfMAUDE/Detail.CFM?MDRFOI__ID=7113646&pc=MTA	2023826-2017-01885	2017-11-08	Injury	STAAR SURGICAL COMPANY	2017-12-13	MTA	IMPLANTABLE COLLAMER LENS (ICL)	Inadequacy of Device Shape and/or Size	Intraocular Pressure Increased; No Code Available	P030016	NA	1	Event Description: THE REPORTED INDICATED THAT THE SURGEON IMPLANTED A MICL13.2,-16.0 DIOPTER, IMPLANTABLE COLLAMER LENS IN THE PATIENT'S RIGHT EYE (OD) ON (B)(6) 2017. ON (B)(6) 2017, THE LENS WAS EXPLANTED DUE TO EXCESSIVE VAULT, ELEVATED (INTRAOCULAR PRESSURE) IOP, NARROWING OF THE ANGLE AND SHALLOWING OF ANTERIOR CHAMBER DEPTH (ACD). THE LENS WAS EXCHANGED FOR A SHORTER LENS AND THE PROBLEM W…	Lens Exchange	Resolved
https://www.accessdata.fda.gov/scripts/cdrh/cfdocs/cfMAUDE/Detail.CFM?MDRFOI__ID=7197904&pc=MTA	2023826-2018-00068	2017-12-08	Injury	STAAR SURGICAL COMPANY	2018-01-16	MTA	IMPLANTABLE COLLAMER LENS (ICL)	Inadequacy of Device Shape and/or Size	Intraocular Pressure Increased; No Code Available	P030016	NA	1	Event Description: THE REPORTER INDICATED THAT THE SURGERY IMPLANTED A MICL12.6, -11.0 DIOPTER, IMPLANTABLE COLLAMER LENS IN THE PATIENT'S RIGHT EYE (OD) ON (B)(6) 2017. ON (B)(6) 2017, THE LENS WAS EXPLANTED DUE TO THE LENS BEING TOO BIG. THE LENS WAS EXCHANGED FOR SHORTER LENS. ATTEMPTS TO OBTAIN ADDITIONAL INFORMATION HAVE BEEN UNSUCCESSFUL. Manufacturer Narrative: DEVICE EVALUATION: THE LENS …	Lens Exchange	Unknown
https://www.accessdata.fda.gov/scripts/cdrh/cfdocs/cfMAUDE/Detail.CFM?MDRFOI__ID=7281453&pc=MTA	2023826-2018-00262	2017-12-22	Injury	STAAR SURGICAL COMPANY	2018-02-19	MTA	IMPLANTABLE COLLAMER LENS (ICL)	Inadequacy of Device Shape and/or Size	Intraocular Pressure Increased; No Code Available	NA	NA	1	Event Description: THE REPORTER INDICATED THAT THE SURGEON IMPLANTED A 13.2MM VICMO13.2 IMPLANTABLE COLLAMER LENS, -18.0 DIOPTER, INTO THE PATIENT'S LEFT EYE (OS) ON (B)(6) 2017. ON (B)(6) 2017 THE LENS WAS EXCHANGED WITH A SMALLER LENS DUE TO EXCESSIVE VAULT AND ANGLE CLOSURE WITH ELEVATED IOP. THE PROBLEM WAS RESOLVED. Manufacturer Narrative: DEVICE EVALUATION: THE LENS WAS RETURNED IN A MICRO …	Lens Exchange	Resolved
https://www.accessdata.fda.gov/scripts/cdrh/cfdocs/cfMAUDE/Detail.CFM?MDRFOI__ID=7356136&pc=MTA	2023826-2018-00431	2018-01-04	Injury	STAAR SURGICAL COMPANY	2018-03-20	MTA	IMPLANTABLE COLLAMER LENS (ICL)	Inadequacy of Device Shape and/or Size	Intraocular Pressure Increased; No Code Available	N/A	NA	1	Event Description: THE REPORTER INDICATED THAT THE SURGEON IMPLANTED A 13.2MM VICM5_13.2 IMPLANTABLE COLLAMER LENS, -5.5 DIOPTER INTO THE PATIENT'S RIGHT EYE (OD) ON (B)(6) 2017. ON (B)(6) 2018 THE LENS WAS EXCHANGED WITH A SHORTER LENS DUE TO EXCESSIVE VAULT, ELEVATED IOP, AND SIGNIFICANT REDUCTION OF IRIDO-CORNEAL ANGLES (ICA).THE PROBLEM WAS NOT RESOLVED DUE TO THE REPLACEMENT LENS DID NOT UNF…	Lens Exchange	Not_Resolved
https://www.accessdata.fda.gov/scripts/cdrh/cfdocs/cfMAUDE/Detail.CFM?MDRFOI__ID=7324462&pc=MTA	2023826-2018-00359	2018-01-18	Injury	STAAR SURGICAL COMPANY	2018-03-08	MTA	IMPLANTABLE COLLAMER LENS (ICL)	Inadequacy of Device Shape and/or Size	Intraocular Pressure Increased; No Code Available	P030016	NA	1	Event Description: THE REPORTER INDICATED THAT HE IMPLANTED A 13.2 MM MICL13.2, -4.0 DIOPTER, IMPLANTABLE COLLAMER LENS IN THE PATIENT RIGHT EYE (OD) ON (B)(6) 2018. ON POST OP DAY 1 EXCESSIVE VAULT, ELEVATED IOP AND ANGLE CLOSURE WAS DISCOVERED. THE PATIENT WAS PLACED ON COMBIGAN TO LOWER IOP. AT DAY 3 AND 5 THE ELEVATED VAULT PERSISTED WITH NARROWING OF THE ANGLE. ON (B)(6) 2018 THE LENS WAS EX…	Lens Exchange	Resolved
https://www.accessdata.fda.gov/scripts/cdrh/cfdocs/cfMAUDE/Detail.CFM?MDRFOI__ID=7324571&pc=MTA	2023826-2018-00360	2018-01-18	Injury	STAAR SURGICAL COMPANY	2018-03-08	MTA	IMPLANTABLE COLLAMER LENS (ICL)	Inadequacy of Device Shape and/or Size	Intraocular Pressure Increased; No Code Available	P030016	NA	1	Event Description: THE REPORTER INDICATED THAT HE IMPLANTED A 13.2MM MICL13.2, -4.5 DIOPTER, IMPLANTABLE COLLAMER LENS IN THE PATIENT LEFT EYE (OS) ON (B)(6) 2018. ON POST OP DAY 1 EXCESSIVE VAULT, ELEVATED IOP AND ANGLE CLOSURE WAS DISCOVERED. THE PATIENT WAS PLACED ON COMBIGAN TO LOWER IOP. AT DAY 3 AND 5 THE ELEVATED VAULT PERSISTED WITH NARROWING OF THE ANGLE. ON (B)(6) 2018 THE LENS WAS EXCH…	Lens Exchange	Resolved
https://www.accessdata.fda.gov/scripts/cdrh/cfdocs/cfMAUDE/Detail.CFM?MDRFOI__ID=7356143&pc=MTA	2023826-2018-00434	2018-01-24	Injury	STAAR SURGICAL COMPANY	2018-03-20	MTA	IMPLANTABLE COLLAMER LENS (ICL)	Inadequacy of Device Shape and/or Size	Intraocular Pressure Increased; No Code Available	NA	NA	1	Event Description: THE REPORTER INDICATED THAT THE SURGEON IMPLANTED A 13.7MM VICMO13.7 IMPLANTABLE COLLAMER LENS, -11.0 DIOPTER, INTO THE PATIENT'S LEFT EYE (OS) ON (B)(6) 2018. ON (B)(6) 2018 THE LENS WAS EXCHANGED WITH A SMALLER LENS DUE TO EXCESSIVE VAULTING, ANGLE CLOSURE, ELEVATED IOP, AND "PROTUBERANT" IRIS. THE PROBLEM WAS RESOLVED. Manufacturer Narrative: LENS WAS RETURNED DRY IN A MICRO…	Lens Extraction	Resolved
https://www.accessdata.fda.gov/scripts/cdrh/cfdocs/cfMAUDE/Detail.CFM?MDRFOI__ID=7558973&pc=MTA	2023826-2018-00834	2018-02-28	Injury	STAAR SURGICAL COMPANY	2018-05-31	MTA	IMPLANTABLE COLLAMER LENS (ICL)	Inadequacy of Device Shape and/or Size	Intraocular Pressure Increased; No Code Available	NA	NA	1	Event Description: THE REPORTER INDICATED THE SURGEON IMPLANTED A 12.6MM VICMO12.6 IMPLANTABLE COLLAMER LENS, -18.00 DIOPTER, IN THE PATIENT'S LEFT EYE (OS) ON (B)(6) 2018. THE LENS WAS EXPLANTED IN A 2ND SURGERY THE SAME DAY DUE TO EXCESSIVE VAULTING AND ELEVATED INTRAOCULAR PRESSURE (IOP). THE LENS WAS NOT EXCHANGED FOR ANOTHER LENS. Manufacturer Narrative: DEVICE EVALUATION: LENS WAS RETURNED …	Lens Extraction	Resolved
https://www.accessdata.fda.gov/scripts/cdrh/cfdocs/cfMAUDE/Detail.CFM?MDRFOI__ID=8172167&pc=MTA	2023826-2018-01850	2018-05-19	Injury	STAAR SURGICAL COMPANY	2018-12-17	MTA	IMPLANTABLE COLLAMER LENS (ICL)	Inadequacy of Device Shape and/or Size	Intraocular Pressure Increased; No Code Available	NA	NA	1	Event Description: THE REPORTER INDICATED THAT THE SURGEON IMPLANTED A 12.6MM VICMO12.6 IMPLANTABLE COLLAMER LENS, -14.0 DIOPTER, INTO THE PATIENT'S RIGHT EYE (OD) ON (B)(6) 2018. THE SURGEON REPORTS EXCESSIVE VAULT, PUPIL BLOCK, ELEVATED IOP, AND ENLARGEMENT OF OR ADDITION OF PI. IT'S REPORTED THAT ON (B)(6) 2018 THE LENS WAS EXPLANTED. IT IS UNKNOWN AS TO WHETHER A REPLACEMENT LENS WAS IMPLANTE…	Lens Extraction + Secondary Operation	Unknown
https://www.accessdata.fda.gov/scripts/cdrh/cfdocs/cfMAUDE/Detail.CFM?MDRFOI__ID=7647578&pc=MTA	2023826-2018-00984	2018-06-06	Injury	STAAR SURGICAL COMPANY	2018-06-28	MTA	IMPLANTABLE COLLAMER LENS (ICL)	Inadequacy of Device Shape and/or Size	Intraocular Pressure Increased; No Code Available	P030016	NA	1	Event Description: THE REPORTER INDICATED THE SURGEON IMPLANTED A 13.2MM MICL13.2 IMPLANTABLE COLLAMER LENS, -8.0 DIOPTER, IN THE PATIENT'S RIGHT EYE (OD) ON (B)(6) 2018. THE LENS WAS EXPLANTED ON (B)(6) 2018 DUE TO IMPROPER FIT. ANOTHER LENS WAS NOT IMPLANTED. ADDITIONAL INFORMATION HAS BEEN REQUESTED BUT NONE HAS BEEN FORTHCOMING. IF ADDITIONAL INFORMATION IS RECEIVED, A SUPPLEMENTAL MEDWATCH W…	Lens Extraction	Unknown
https://www.accessdata.fda.gov/scripts/cdrh/cfdocs/cfMAUDE/Detail.CFM?MDRFOI__ID=7683601&pc=MTA	2023826-2018-01019	2018-06-09	Injury	STAAR SURGICAL COMPANY	2018-07-12	MTA	MICL	Inadequacy of Device Shape and/or Size	Intraocular Pressure Increased; No Code Available	P030016	NA	1	Event Description: THE SURGEON INDICATED THAT A12.6MM MICL12.6, -9.0 DIOPTER, IMPLANTABLE COLLAMER LENS WAS IMPLANTED INTO THE PATIENT'S LEFT EYE (OS) ON (B)(6) 2018. ON (B)(6) 2018 THE LENS WAS REMOVED AND EXCHANGED FOR A SHORTER LENGTH LENS DUE TO OBSERVATION OF EXCESSIVE VAULT. THIS EXCHANGE RESOLVED THE PROBLEM. Manufacturer Narrative: ADDITIONAL INFORMATION: ANGLE CLOSURE. WORK ORDER SEARCH:…	Lens Exchange	Resolved
https://www.accessdata.fda.gov/scripts/cdrh/cfdocs/cfMAUDE/Detail.CFM?MDRFOI__ID=7706773&pc=MTA	2023826-2018-01067	2018-06-20	Injury	STAAR SURGICAL COMPANY	2018-07-20	MTA	IMPLANTABLE COLLAMER LENS (ICL)	Inadequacy of Device Shape and/or Size	Intraocular Pressure Increased; No Code Available	P030016	NA	1	Event Description: THE REPORTER INDICATED THAT THE SURGEON IMPLANTED 12.6MM MICL12.6, -16.0 DIOPTER IMPLANTABLE COLLAMER LENS INTO THE PATIENT'S LEFT EYE (OS) ON (B)(6) 2018. ON (B)(6) 2018 THE LENS WAS REMOVED BY A SURGEON THAT WAS ON CALL DUE TO OBSERVATION OF EXCESSIVE VAULT, SIGNIFICANT REDUCTION OF IRIDO-CORNEAL ANGLES, PUPIL BLOCK AND ANGLE CLOSURE WITH ELEVATED IOP (INTRAOCULAR PRESSURE). …	Lens Exchange + Secondary Operation	Resolved
https://www.accessdata.fda.gov/scripts/cdrh/cfdocs/cfMAUDE/Detail.CFM?MDRFOI__ID=7903843&pc=MTA	2023826-2018-01372	2018-06-25	Injury	STAAR SURGICAL COMPANY	2018-09-24	MTA	IMPLANTABLE COLLAMER LENS (ICL)	Inadequacy of Device Shape and/or Size	Intraocular Pressure Increased; No Code Available	N/A	NA	1	Event Description: THE REPORTER INDICATED THAT THE SURGEON IMPLANTED A 13.2MM VICMO13.2, -11.0 DIOPTER, IMPLANTABLE COLLAMER LENS INTO THE PATIENTS RIGHT EYE (OD) ON (B)(6) 2018. EXCESSIVE VAULT WAS OBSERVED AND ELEVATED IOP (45MMHG) WITHOUT PUPIL BLOCK AND ANGLE CLOSURE ASSESSED ON (B)(6) 2018. ON (B)(6) 2018 THE LENS WAS EXCHANGED FOR A SHORTER LENGTH LENS. THIS EXCHANGE RESOLVED THE PROBLEM. M…	Lens Exchange	Resolved
https://www.accessdata.fda.gov/scripts/cdrh/cfdocs/cfMAUDE/Detail.CFM?MDRFOI__ID=7954052&pc=MTA	2023826-2018-01504	2018-09-06	Injury	STAAR SURGICAL COMPANY	2018-10-10	MTA	IMPLANTABLE COLLAMER LENS (ICL)	Inadequacy of Device Shape and/or Size	Intraocular Pressure Increased; No Code Available	P030016	NA	1	Event Description: THE REPORTER INDICATED THE SURGEON IMPLANTED A 13.7MM MICL13.7 IMPLANTABLE COLLAMER LENS, -15.5 DIOPTER, IN THE PATIENTS LEFT EYE (OS) ON (B)(6) 2018. AT ONE DAY POST-OP, THE LENS WAS TRYING TO PROTRUDE THROUGH THE PUPIL AND WAS KINKED (TOO BIG). THE PUPIL WOULD NOT CONSTRICT. THE LENS WAS EXPLANTED ON (B)(6) 2018 BUT THE PUPIL REMAINED DILATED. THE INCISION WAS ENLARGED SLIGHT…	Lens Extraction	Resolved
https://www.accessdata.fda.gov/scripts/cdrh/cfdocs/cfMAUDE/Detail.CFM?MDRFOI__ID=8176802&pc=MTA	2023826-2018-01854	2018-09-18	Injury	STAAR SURGICAL COMPANY	2018-12-18	MTA	IMPLANTABLE COLLAMER LENS (ICL)	Inadequacy of Device Shape and/or Size	Intraocular Pressure Increased; No Code Available	NA	NA	1	Event Description: THE REPORTER INDICATED THE SURGEON IMPLANTED A 13.7MM VICMO13.7 IMPLANTABLE COLLAMER LENS, -17.00 DIOPTER, IN THE PATIENT'S RIGHT EYE (OD) ON (B)(6) 2018. THE LENS WAS EXPLANTED ON (B)(6) 2018 DUE TO EXCESSIVE VAULTING, ELEVATED INTRAOCULAR PRESSURE (IOP) (30 MMHG) AND PUPIL DILATION. THE PATIENT WAS TREATED WITH MEDICATION. DUE TO THE PATIENTS SYMPTOMS, THE SURGEON PERFORMED A…	Lens Exchange + Secondary Operation	Resolved
https://www.accessdata.fda.gov/scripts/cdrh/cfdocs/cfMAUDE/Detail.CFM?MDRFOI__ID=8048978&pc=MTA	2023826-2018-01612	2018-10-10	Injury	STAAR SURGICAL COMPANY	2018-11-07	MTA	IMPLANTABLE COLLAMER LENS (ICL)	Inadequacy of Device Shape and/or Size	Intraocular Pressure Increased; No Code Available	N/A	NA	1	Event Description: THE REPORTER INDICATED THAT THE SURGEON IMPLANTED A 13.2 MM VICM5_13.2, -11.0 DIOPTER, IMPLANTABLE COLLAMER LENS INTO THE PATIENT'S RIGHT EYE (OD) ON (B)(6) 2018. ON (B)(6) 2018 THE LENS WAS EXCHANGED FOR A SHORTER LENS DUE TO OBSERVATION OF EXCESSIVE VAULT AND ELEVATED IOP WITHOUT PUPIL BLOCK AND ANGLE CLOSURE. THIS EXCHANGE RESOLVED THE PROBLEM. Manufacturer Narrative: DEVICE…	Lens Exchange	Resolved
https://www.accessdata.fda.gov/scripts/cdrh/cfdocs/cfMAUDE/Detail.CFM?MDRFOI__ID=8113339&pc=MTA	2023826-2018-01752	2018-10-25	Injury	STAAR SURGICAL COMPANY	2018-11-28	MTA	IMPLANTABLE COLLAMER LENS (ICL)	Inadequacy of Device Shape and/or Size	Intraocular Pressure Increased; No Code Available	P030016	NA	1	Event Description: THE REPORTER INDICATED THE SURGEON IMPLANTED A 13.2MM MICL13.2 IMPLANTABLE COLLAMER LENS, -10.0 DIOPTER, IN THE PATIENTS RIGHT EYE (OD) ON (B)(6) 2018. THE LENS WAS EXPLANTED ON (B)(6) 2018 DUE TO EXCESSIVE VAULTING, WHICH CAUSED AN INCREASE IN PRESSURE. THE LENS WAS EXCHANGED FOR A SHORTER LENS AND THE PROBLEM WAS RESOLVED. Manufacturer Narrative: CORRECTED DATA: PREVIOUS MDR …	Lens Exchange	Resolved
https://www.accessdata.fda.gov/scripts/cdrh/cfdocs/cfMAUDE/Detail.CFM?MDRFOI__ID=8217921&pc=MTA	2023826-2019-00009	2018-11-16	Injury	STAAR SURGICAL COMPANY	2019-01-04	MTA	IMPLANTABLE COLLAMER LENS (ICL)	Inadequacy of Device Shape and/or Size	Intraocular Pressure Increased; No Code Available	N/A	NA	1	Event Description: "TTHE" REPORTER INDICATED THAT A 13.2MM, VICM5_13.2, -8.00 DIOPTER, IMPLANTABLE COLLAMER LENS WAS IMPLANTED INTO THE PATIENT'S RIGHT EYE (OD) ON (B)(6) 2018. ON (B)(6) 2018 THE LENS WAS EXCHANGED FOR A SHORTER LENGTH LENS DUE TO EXCESSIVE VAULT AND ELEVATED IOP (INTRAOCULAR PRESSURE) WITHOUT PUPIL BLOCK AND ANGLE CLOSURE. THIS EXCHANGE RESOLVED THE PROBLEM. Manufacturer Narrati…	Lens Exchange	Resolved
https://www.accessdata.fda.gov/scripts/cdrh/cfdocs/cfMAUDE/Detail.CFM?MDRFOI__ID=8218075&pc=MTA	2023826-2019-00010	2018-11-16	Injury	STAAR SURGICAL COMPANY	2019-01-04	MTA	IMPLANTABLE COLLAMER LENS (ICL)	Inadequacy of Device Shape and/or Size	Intraocular Pressure Increased; No Code Available	N/A	NA	1	Event Description: TTHE REPORTER INDICATED THAT A 13.2MM, VICM5_13.2, -6.50 DIOPTER, IMPLANTABLE COLLAMER LENS WAS IMPLANTED INTO THE PATIENT'S LEFT EYE (OS) ON (B)(6) 2018. ON (B)(6) 2018 THE LENS WAS EXCHANGED FOR A SHORTER LENGTH LENS DUE TO EXCESSIVE VAULT AND ELEVATED IOP (INTRAOCULAR PRESSURE) WITHOUT PUPIL BLOCK AND ANGLE CLOSURE. THIS EXCHANGE RESOLVED THE PROBLEM. Manufacturer Narrative:…	Lens Exchange	Resolved
https://www.accessdata.fda.gov/scripts/cdrh/cfdocs/cfMAUDE/Detail.CFM?MDRFOI__ID=8768409&pc=MTA	2023826-2019-01184	2018-12-03	Injury	STAAR SURGICAL COMPANY	2019-07-08	MTA	IMPLANTABLE COLLAMER LENS (ICL)	Inadequacy of Device Shape and/or Size	Intraocular Pressure Increased; No Code Available	N/A	NA	1	Event Description: THE REPORTER INDICATED THAT A 13 MM, VICMO13.2, -17.00 DIOPTER, IMPLANTABLE COLLAMER LENS, WAS IMPLANTED INTO THE PATIENTS RIGHT EYE (OD) ON (B)(6) 2018. ON (B)(6) 2019 THE LENS WAS REMOVED DUE TO EXCESSIVE VAULT, ELEVATED IOP AND PIGMENT DISPERSION. A REPLACEMENT LENS WAS LATER IMPLANTED AND THE PROBLEM WAS RESOLVED. THE REPORTER ALSO REPORTER THAT WHEN THE LENS WAS REMOVED TH…	Lens Exchange	Resolved
https://www.accessdata.fda.gov/scripts/cdrh/cfdocs/cfMAUDE/Detail.CFM?MDRFOI__ID=8219260&pc=MTA	2023826-2019-00044	2018-12-05	Injury	STAAR SURGICAL COMPANY	2019-01-04	MTA	IMPLANTABLE COLLAMER LENS (ICL)	Inadequacy of Device Shape and/or Size	Intraocular Pressure Increased; No Code Available	P030016	NA	1	Event Description: THE REPORTER INDICATED THAT THE SURGEON IMPLANTED A 13.7MM, MICL13.7, -6.5 DIOPTER, IMPLANTABLE COLLAMER LENS INTO THE PATIENT'S EYE ON (B)(6) 2018. ELEVATED IOP (INTRAOCULAR PRESSURE) WITHOUT PUPIL BLOCK AND ANGLE CLOSURE WAS OBSERVED, DATE ASSESSED: (B)(6) 2018. LENS REMAINS IMPLANTED, SURGEON HAD PLANNED TO EXCHANGE THE LENS ON (B)(6) 2018 FOR A SHORTER LENGTH LENS BUT THE S…	Lens Exchange	Resolved
https://www.accessdata.fda.gov/scripts/cdrh/cfdocs/cfMAUDE/Detail.CFM?MDRFOI__ID=8356222&pc=MTA	2023826-2019-00297	2018-12-14	Injury	STAAR SURGICAL COMPANY	2019-02-20	MTA	IMPLANTABLE COLLAMER LENS (ICL)	Inadequacy of Device Shape and/or Size	Intraocular Pressure Increased; No Code Available	N/A	NA	1	Event Description: THE REPORTER INDICATED THAT THE SURGEON IMPLANTED A13.2MM, VICMO13.2, -14.50 DIOPTER, IMPLANTABLE COLLAMER LENS INTO THE PATIENTS LEFT EYE (OS) ON (B)(6) 2018. ON (B)(6) 2018 THE LENS WAS EXCHANGED WITH A SHORTER LENGTH LENS DUE TO EXCESSIVE VAULT AND ELEVATED IOP (DATE ASSESSED: (B)(6) 2018). THIS EXCHANGE RESOLVED THE PROBLEM. Manufacturer Narrative: DEVICE EVALUATION: LENS W…	Lens Exchange	Resolved
https://www.accessdata.fda.gov/scripts/cdrh/cfdocs/cfMAUDE/Detail.CFM?MDRFOI__ID=8656475&pc=MTA	2023826-2019-00970	2018-12-23	Injury	STAAR SURGICAL COMPANY	2019-05-30	MTA	IMPLANTABLE COLLAMER LENS (ICL)	Inadequacy of Device Shape and/or Size	Intraocular Pressure Increased; No Code Available	NA	NA	1	Event Description: THE REPORTER INDICATED THE SURGEON IMPLANTED A 13.2MM VICMO13.2 IMPLANTABLE COLLAMER LENS, -06.50 DIOPTER, IN THE PATIENT'S LEFT EYE (OS) ON (B)(6) 2018. THE LENS WAS EXPLANTED ON (B)(6) 2018 DUE TO EXCESSIVE VAULTING. THE LENS WAS NOT EXCHANGED FOR ANOTHER LENS. THE CAUSE OF THE EVENT WAS UNKNOWN. Manufacturer Narrative: DEVICE EVALUATION: THE LENS WAS RETURNED DRY IN LENS CAS…	Lens Exchange	Resolved
https://www.accessdata.fda.gov/scripts/cdrh/cfdocs/cfMAUDE/Detail.CFM?MDRFOI__ID=8372544&pc=MTA	2023826-2019-00330	2019-01-30	Injury	STAAR SURGICAL COMPANY	2019-02-26	MTA	IMPLANTABLE COLLAMER LENS (ICL)	Inadequacy of Device Shape and/or Size	Intraocular Pressure Increased; No Code Available	N/A	NA	1	Event Description: THE REPORTER INDICATED THAT THE SURGEON IMPLANTED A 13.2MM VICM5_13.2 IMPLANTABLE COLLAMER LENS, -11.5 DIOPTER INTO THE PATIENT'S LEFT EYE (OS) ON (B)(6) 2019. ON (B)(6) 2019 THE LENS WAS EXPLANTED DUE TO EXCESSIVE VAULT. NO ADDITIONAL INFORMATION IS AVAILABLE. Manufacturer Narrative: ADDITIONAL INFORMATION: THE REPORTER STATES ADDITIONAL PATIENT SYMPTOMS OF ANGLE CLOSURE AND E…	Lens Extraction	Unknown
https://www.accessdata.fda.gov/scripts/cdrh/cfdocs/cfMAUDE/Detail.CFM?MDRFOI__ID=8633167&pc=MTA	2023826-2019-00877	2019-02-06	Injury	STAAR SURGICAL COMPANY	2019-05-22	MTA	IMPLANTABLE COLLAMER LENS (ICL)	Inadequacy of Device Shape and/or Size	Intraocular Pressure Increased; No Code Available	N/A	NA	1	Event Description: THE REPORTER INDICATED THAT THE SURGEON IMPLANTED A 13.2MM VICM5_13.2 IMPLANTABLE COLLAMER LENS, -5.0 DIOPTER INTO THE PATIENT'S RIGHT EYE (OD) ON (B)(6) 2019. ON (B)(6) 2019 THE LENS WAS EXCHANGED WITH A SHORTER LENS DUE TO EXCESSIVE VAULT, ELEVATED IOP, AND UNREACTIVE (FIXED) PUPIL. THE PROBLEM WAS RESOLVED. THE CAUSE OF THE EVENT IS REPORTED AS A PATIENT-RELATED FACTOR. Manu…	Lens Exchange	Resolved
https://www.accessdata.fda.gov/scripts/cdrh/cfdocs/cfMAUDE/Detail.CFM?MDRFOI__ID=10093969&pc=MTA	2023826-2020-01120	2019-02-06	Injury	STAAR SURGICAL COMPANY	2020-05-27	MTA	IMPLANTABLE COLLAMER LENS (ICL)	Inadequacy of Device Shape and/or Size	Intraocular Pressure Increased; No Code Available	NA	NA	1	Event Description: THE REPORTER INDICATED THE SURGEON IMPLANTED A 13.7MM VICMO13.7 IMPLANTABLE COLLAMER LENS, -11.00 DIOPTER, IN THE PATIENT'S RIGHT EYE (OD) ON (B)(6) 2019. THE LENS WAS EXPLANTED ON (B)(6) 2019 DUE TO EXCESSIVE VAULTING AND ELEVATED INTRAOCULAR PRESSURE (IOP). THE LENS WAS EXCHANGED FOR A SHORTER LENS AND THE PROBLEM WAS RESOLVED. CAUSE OF THE EVENT WAS UNKNOWN. Manufacturer Nar…	Lens Exchange	Resolved
https://www.accessdata.fda.gov/scripts/cdrh/cfdocs/cfMAUDE/Detail.CFM?MDRFOI__ID=8471422&pc=MTA	2023826-2019-00458	2019-03-01	Injury	STAAR SURGICAL COMPANY	2019-04-01	MTA	IMPLANTABLE COLLAMER LENS (ICL)	Inadequacy of Device Shape and/or Size	Intraocular Pressure Increased; No Code Available	P030016	NA	1	Event Description: THE REPORTER INDICATED THAT THE SURGEON IMPLANTED A 12.6MM MICL12.6, -9.5 DIOPTER , IMPLANTABLE COLLAMER LENS INTO THE PATIENTS RIGHT EYE (OD) ON (B)(6) 2019. THE LENS WAS REMOVED AND REPLACED ON (B)(6) 2019 FOR A SHORTER LENGTH LENS DUE TO EXCESSIVE VAULT, SIGNIFICANT REDUCTION OF IRIDO-CORNELA ANGLES, AND ELEVATED IOP (24 MMHG) WITHOUT PUPIL BLOCK AND ANGLE CLOSURE. THIS RESO…	Lens Exchange	Resolved
https://www.accessdata.fda.gov/scripts/cdrh/cfdocs/cfMAUDE/Detail.CFM?MDRFOI__ID=8488607&pc=MTA	2023826-2019-00541	2019-03-06	Injury	STAAR SURGICAL COMPANY	2019-04-05	MTA	IMPLANTABLE COLLAMER LENS (ICL)	Inadequacy of Device Shape and/or Size	Intraocular Pressure Increased; No Code Available	P030016	NA	1	Event Description: THE REPORTER INDICATED THAT A 12.6MM, MICL12.6, -12.5 DIOPTER, IMPLANTABLE COLLAMER LENS WAS IMPLANTED INTO THE PATIENTS RIGHT EYE (OD) ON (B)(6) 2019. THE LENS WAS REMOVED DUE TO EXCESSIVE VAULT AND PUPIL BLOCK WITH ELEVATED INTRAOCULAR PRESSURE. ON (B)(6) 2019 A SHORTER LENGTH REPLACEMENT LENS WAS IMPLANTED AND THEY STATED THAT THE PROBLEM RESOLVED. HOWEVER, FOR STATUS OF THE…	Lens Exchange	Resolved
https://www.accessdata.fda.gov/scripts/cdrh/cfdocs/cfMAUDE/Detail.CFM?MDRFOI__ID=8633168&pc=MTA	2023826-2019-00878	2019-03-12	Injury	STAAR SURGICAL COMPANY	2019-05-22	MTA	IMPLANTABLE COLLAMER LENS (ICL)	Inadequacy of Device Shape and/or Size	Intraocular Pressure Increased; No Code Available	N/A	NA	1	Event Description: THE REPORTER INDICATED THAT THE SURGEON IMPLANTED A 13.7MM VICM5_13.7 IMPLANTABLE COLLAMER LENS, -12.5 DIOPTER INTO THE PATIENT'S RIGHT EYE (OD) ON (B)(6) 2019. ON (B)(6) 2019 THE LENS WAS EXPLANTED DUE TO EXCESSIVE VAULT AND ELEVATED IOP. CURRENTLY, NO REPLACEMENT LENS HAS BEEN IMPLANTED. THE CAUSE OF THE EVENT IS REPORTED AS A PATIENT-RELATED FACTOR. Manufacturer Narrative: W…	Lens Extraction	Unknown
https://www.accessdata.fda.gov/scripts/cdrh/cfdocs/cfMAUDE/Detail.CFM?MDRFOI__ID=9279660&pc=MTA	2023826-2019-02066	2019-03-12	Injury	STAAR SURGICAL COMPANY	2019-11-05	MTA	IMPLANTABLE COLLAMER LENS (ICL)	Inadequacy of Device Shape and/or Size	Intraocular Pressure Increased; No Code Available	NA	NA	1	Event Description: THE REPORTER INDICATED THAT THE SURGEON IMPLANTED A 12.6MM VICMO12.6 IMPLANTABLE COLLAMER LENS, -9.0 DIOPTER, INTO THE PATIENT'S LEFT EYE (OS) ON (B)(6) 2019. ON (B)(6) 2019 THE LENS WAS EXCHANGED WITH A SHORTER LENS DUE TO EXCESSIVE VAULT AND ELEVATED IOP. THE PROBLEM WAS RESOLVED. THE CAUSE OF THE EVENT IS REPORTED AS UNKNOWN. Manufacturer Narrative: ADDITIONAL DATA: H3- DEVI…	Lens Exchange	Resolved
https://www.accessdata.fda.gov/scripts/cdrh/cfdocs/cfMAUDE/Detail.CFM?MDRFOI__ID=8586235&pc=MTA	2023826-2019-00745	2019-03-18	Injury	STAAR SURGICAL COMPANY	2019-05-07	MTA	IMPLANTABLE COLLAMER LENS (ICL)	Inadequacy of Device Shape and/or Size	Intraocular Pressure Increased; No Code Available	NA	NA	1	Event Description: THE REPORTER INDICATED THE SURGEON IMPLANTED A 13.2MM VICMO13.2 IMPLANTABLE COLLAMER LENS, -07.50 DIOPTER, IN THE PATIENT'S RIGHT EYE (OD) ON (B)(6) 2019. THE LENS WAS EXPLANTED ON (B)(6) 2019 DUE TO EXCESSIVE VAULTING, ELEVATED INTRAOCULAR PRESSURE (IOP) AND SIGNIFICANT REDUCTION OF IRIDO-CORNEAL ANGLES. THE LENS WAS NOT EXCHANGED FOR ANOTHER LENS. THE REPORTER INDICATED THE C…	Lens Extraction	Unknown
https://www.accessdata.fda.gov/scripts/cdrh/cfdocs/cfMAUDE/Detail.CFM?MDRFOI__ID=8586259&pc=MTA	2023826-2019-00746	2019-03-18	Injury	STAAR SURGICAL COMPANY	2019-05-07	MTA	IMPLANTABLE COLLAMER LENS (ICL)	Inadequacy of Device Shape and/or Size	Intraocular Pressure Increased; No Code Available	NA	NA	1	Event Description: THE REPORTER INDICATED THE SURGEON IMPLANTED A 13.2MM VICMO13.2 IMPLANTABLE COLLAMER LENS, -11.00 DIOPTER, IN THE PATIENT'S LEFT EYE (OS) ON (B)(6) 2019. THE LENS WAS EXPLANTED ON (B)(6) 2019 DUE TO EXCESSIVE VAULTING, ELEVATED INTRAOCULAR PRESSURE (IOP) AND SIGNIFICANT REDUCTION OF IRIDO-CORNEAL ANGLES. THE LENS WAS NOT EXCHANGED FOR ANOTHER LENS. THE REPORTER INDICATED THE CA…	Lens Extraction	Unknown
https://www.accessdata.fda.gov/scripts/cdrh/cfdocs/cfMAUDE/Detail.CFM?MDRFOI__ID=8588494&pc=MTA	2023826-2019-00777	2019-04-11	Injury	STAAR SURGICAL COMPANY	2019-05-07	MTA	IMPLANTABLE COLLAMER LENS (ICL)	Inadequacy of Device Shape and/or Size	Intraocular Pressure Increased; No Code Available	N/A	NA	1	Event Description: THE REPORTER INDICATED THAT A 13.2MM, VICM5_13.2, -9.50 DIOPTER, IMPLANTABLE COLLAMER LENS WAS IMPLANTED INTO THE PATIENTS RIGHT EYE (OD) ON (B)(6) 2019. HIGH IOP (INTRAOCULAR PRESSURE) AND A VAULT VALUE WAS REPORTED. PATIENT BCVA IS 20/20, LENS REMAINS IN THE EYE AND SURGEON PLANS TO EXCHANGE THE LENS. ADDITIONAL INFORMATION HAS BEEN REQUESTED BUT NONE HAS BEEN FORTHCOMING. IF…	Lens Exchange	Resolved
https://www.accessdata.fda.gov/scripts/cdrh/cfdocs/cfMAUDE/Detail.CFM?MDRFOI__ID=8591429&pc=MTA	2023826-2019-00778	2019-04-11	Injury	STAAR SURGICAL COMPANY	2019-05-08	MTA	IMPLANTABLE COLLAMER LENS (ICL)	Inadequacy of Device Shape and/or Size	Intraocular Pressure Increased; No Code Available	N/A	NA	1	Event Description: THE REPORTER INDICATED THAT A 13.2MM, VICM5_13.2, -7.50 DIOPTER, IMPLANTABLE COLLAMER LENS WAS IMPLANTED INTO THE PATIENTS LEFT EYE (OS) ON (B)(6) 2019. HIGH IOP (INTRAOCULAR PRESSURE) AND A VAULT VALUE WAS REPORTED. PATIENT BCVA IS 20/20, LENS REMAINS IN THE EYE AND SURGEON PLANS TO EXCHANGE THE LENS. ADDITIONAL INFORMATION HAS BEEN REQUESTED BUT NONE HAS BEEN FORTHCOMING. IF …	Lens Exchange	Resolved
https://www.accessdata.fda.gov/scripts/cdrh/cfdocs/cfMAUDE/Detail.CFM?MDRFOI__ID=9317909&pc=MTA	2023826-2019-02125	2019-05-09	Injury	STAAR SURGICAL COMPANY	2019-11-13	MTA	IMPLANTABLE COLLAMER LENS (ICL)	Inadequacy of Device Shape and/or Size	Intraocular Pressure Increased; No Code Available	NA	NA	1	Event Description: THE REPORTER INDICATED THAT THE SURGEON IMPLANTED A 12.6MM VICMO12.6 IMPLANTABLE COLLAMER LENS, DIOPTER -10.5, INTO THE PATIENT'S LEFT EYE (OS) ON (B)(6) 2019. ON (B)(6) 2019 THE LENS WAS EXCHANGED WITH THE SAME SIZE LENS DUE TO EXCESSIVE VAULT, ELEVATED IOP, AND SIGNIFICANT REDUCTION OF IRIDO-CORNEAL ANGLES (ICA). THE PROBLEM WAS RESOLVED. THE CAUSE OF THE EVENT IS REPORTED AS…	Lens Exchange	Resolved
https://www.accessdata.fda.gov/scripts/cdrh/cfdocs/cfMAUDE/Detail.CFM?MDRFOI__ID=8957671&pc=MTA	2023826-2019-01535	2019-05-14	Injury	STAAR SURGICAL COMPANY	2019-09-03	MTA	IMPLANTABLE COLLAMER LENS (ICL)	Inadequacy of Device Shape and/or Size	Intraocular Pressure Increased; No Code Available	N/A	NA	1	Event Description: THE REPORTER INDICATED THAT A 13.2MM, VICMO13.2, -10.50 DIOPTER, IMPLANTABLE COLLAMER LENS WAS IMPLANTED INTO THE PATIENT'S RIGHT EYE (OD) ON (B)(6) 2019. SIGNIFICANT REDUCTION OF IRIDO-CORNEAL ANGELS, ELEVATED IOP (27 MMHG) WITHOUT PUPIL BLOCK AND ANGLE CLOSURE, WITH EXCESSIVE VAULT WERE OBSERVED ON (B)(6) 2019. LENS WAS REMOVED AND EXCHANGED FOR A SHORTER LENGTH LENS ON (B)(6…	Lens Exchange	Resolved
https://www.accessdata.fda.gov/scripts/cdrh/cfdocs/cfMAUDE/Detail.CFM?MDRFOI__ID=9913404&pc=MTA	2023826-2020-00721	2019-06-15	Injury	STAAR SURGICAL COMPANY	2020-04-01	MTA	IMPLANTABLE COLLAMER LENS (ICL)	Inadequacy of Device Shape and/or Size	Intraocular Pressure Increased; No Code Available	NA	NA	1	Event Description: THE REPORTER INDICATED THE SURGEON IMPLANTED A 13.2MM VICMO13.2 IMPLANTABLE COLLAMER LENS, -14.00 DIOPTER, IN THE PATIENT'S RIGHT EYE (OD) ON (B)(6) 2019. THE LENS WAS EXPLANTED ON (B)(6) 2019 DUE TO EXCESSIVE VAULTING AND ELEVATED INTRAOCULAR PRESSURE (IOP). THE LENS WAS EXCHANGED FOR A SHORTER LENS AND THE PROBLEM WAS RESOLVED. CAUSE OF THE EVENT WAS UNKNOWN. Manufacturer Nar…	Lens Exchange	Resolved
https://www.accessdata.fda.gov/scripts/cdrh/cfdocs/cfMAUDE/Detail.CFM?MDRFOI__ID=8939422&pc=MTA	2023826-2019-01558	2019-07-06	Injury	STAAR SURGICAL COMPANY	2019-08-28	MTA	IMPLANTABLE COLLAMER LENS (ICL)	Inadequacy of Device Shape and/or Size	Intraocular Pressure Increased; No Code Available	N/A	NA	1	Event Description: THE REPORTER INDICATED THAT A 12.6MM, VICM5 12.6, -05.00, IMPLANTABLE COLLAMER LENS WAS IMPLANTED INTO THE PATIENT'S RIGHT EYE (OD) ON (B)(6) 2019. PUPIL BLOCK WITH ELEVATE IOP (50 MMHG) AND EXCESSIVE VAULT WERE OBSERVED ON (B)(6) 2019. THE LENS WAS REMOVED ON (B)(6) 2019. CAUSE OF THE EVENT IS REPORTED AS "IRIS PROLAPSE OCCURRED DURING SURGERY. OVD REMAINED IN THE EYE AFTER SU…	Lens Retention	Unknown
https://www.accessdata.fda.gov/scripts/cdrh/cfdocs/cfMAUDE/Detail.CFM?MDRFOI__ID=9317874&pc=MTA	2023826-2019-02139	2019-07-13	Injury	STAAR SURGICAL COMPANY	2019-11-13	MTA	IMPLANTABLE COLLAMER LENS (ICL)	Inadequacy of Device Shape and/or Size	Intraocular Pressure Increased; No Code Available	NA	NA	1	Event Description: THE REPORTER INDICATED THAT THE SURGEON IMPLANTED A 13.2MM VICMO13.2 IMPLANTABLE COLLAMER LENS, -10.5 DIOPTER, INTO THE PATIENT'S RIGHT EYE (OD) ON (B)(6) 2019. ON (B)(6) 2019 THE LENS WAS EXCHANGED WITH A SHORTER LENS DUE TO EXCESSIVE VAULT, ELEVATED IOP, SIGNIFICANT REDUCTION OF IRIDO-CORNEAL ANGLES (ICA), AND ANGLE CLOSURE. THE PROBLEM WAS RESOLVED. THE CAUSE OF THE EVENT IS…	Lens Exchange	Resolved
https://www.accessdata.fda.gov/scripts/cdrh/cfdocs/cfMAUDE/Detail.CFM?MDRFOI__ID=8908374&pc=MTA	2023826-2019-01488	2019-07-23	Injury	STAAR SURGICAL COMPANY	2019-08-19	MTA	IMPLANTABLE COLLAMER LENS (ICL)	Inadequacy of Device Shape and/or Size	Intraocular Pressure Increased; No Code Available	P030016	NA	1	Event Description: THE REPORTER INDICATED THE SURGEON IMPLANTED A 12.6MM MICL12.6 IMPLANTABLE COLLAMER LENS, -13.0 DIOPTER, IN THE PATIENTS LEFT EYE (OS) ON (B)(6) 2019. THE LENS WAS EXPLANTED ON (B)(6) 2019 DUE TO EXCESSIVE VAULTING, ANGLE CLOSURE WITH ELEVATED INTRAOCULAR PRESSURE (IOP). AT 4 HOUR IOP CHECK, THE IOP WAS 51 MMHG DUE TO ANGLE CLOSURE FROM EXCESSIVE VAULTING. IOP WAS CONTROLLED BY…	Lens Extraction + Secondary Operation	Unknown
https://www.accessdata.fda.gov/scripts/cdrh/cfdocs/cfMAUDE/Detail.CFM?MDRFOI__ID=8910129&pc=MTA	2023826-2019-01467	2019-07-25	Injury	STAAR SURGICAL COMPANY	2019-08-20	MTA	IMPLANTABLE COLLAMER LENS (ICL)	Inadequacy of Device Shape and/or Size	Intraocular Pressure Increased; No Code Available	N/A	NA	1	Event Description: THE REPORTER INDICATED THAT A 13.2MM, VICM513.2, -10.00 DIOPTER, IMPLANTABLE COLLAMER LENS WAS IMPLANTED INTO THE PATIENT'S RIGHT EYE (OD) ON (B)(6) 2019. ELEVATED IOP (24 MMHG) WITHOUT PUPIL BLOCK AND ANGLE CLOSURE, WITH EXCESSIVE VAULT WAS OBSERVED ON (B)(6) 2019. LENS REMAINS IMPLANTED. CAUSE OF THE EVENT IS REPORTED AS UNKNOWN. ADDITIONAL INFORMATION HAS BEEN REQUESTED BUT …	Lens Repositioning	Resolved
https://www.accessdata.fda.gov/scripts/cdrh/cfdocs/cfMAUDE/Detail.CFM?MDRFOI__ID=8910138&pc=MTA	2023826-2019-01468	2019-07-25	Injury	STAAR SURGICAL COMPANY	2019-08-20	MTA	IMPLANTABLE COLLAMER LENS (ICL)	Inadequacy of Device Shape and/or Size	Intraocular Pressure Increased; No Code Available	N/A	NA	1	Event Description: THE REPORTER INDICATED THAT A 13.2MM, VICM513.2, -10.00 DIOPTER, IMPLANTABLE COLLAMER LENS WAS IMPLANTED INTO THE PATIENT'S LEFT EYE (OS) ON (B)(6) 2019. ELEVATED IOP (25 MMHG) WITHOUT PUPIL BLOCK AND ANGLE CLOSURE, WITH EXCESSIVE VAULT WAS OBSERVED ON (B)(6) 2019. LENS REMAINS IMPLANTED. CAUSE OF THE EVENT IS REPORTED AS UNKNOWN. ADDITIONAL INFORMATION HAS BEEN REQUESTED BUT N…	Lens Repositioning	Resolved
https://www.accessdata.fda.gov/scripts/cdrh/cfdocs/cfMAUDE/Detail.CFM?MDRFOI__ID=9588875&pc=MTA	2023826-2020-00121	2019-10-10	Injury	STAAR SURGICAL COMPANY	2020-01-14	MTA	IMPLANTABLE COLLAMER LENS (ICL)	Inadequacy of Device Shape and/or Size	Intraocular Pressure Increased; No Code Available	NA	NA	1	Event Description: THE REPORTER INDICATED THAT A 13.2MM, VICM5_13.2, -11.00 DIOPTER, IMPLANTABLE COLLAMER LENS WAS IMPLANTED INTO THE PATIENTS LEFT EYE (OS) ON (B)(6) 2019. THE REPORTER STATED THAT THE PATIENT EXPERIENCED ELEVATED IOP AND EXCESSIVE VAULT. IOP WAS CONTROLLED WITH ANTI IOP DROPS, BCVA 6/12. LENS REMAINS IMPLANTED. IF ADDITIONAL INFORMATION IS RECEIVED A SUPPLEMENTAL MEDWATCH REPORT…	Lens Exchange + Secondary Operation	Resolved
https://www.accessdata.fda.gov/scripts/cdrh/cfdocs/cfMAUDE/Detail.CFM?MDRFOI__ID=10308814&pc=MTA	2023826-2020-01525	2019-12-04	Injury	STAAR SURGICAL COMPANY	2020-07-22	MTA	IMPLANTABLE COLLAMER LENS (ICL)	Inadequacy of Device Shape and/or Size	Intraocular Pressure Increased; No Code Available	N/A	NA	1	Event Description: THE REPORTER INDICATED THAT THE SURGEON IMPLANTED A 13.2MM VICMO13.2, -18.00 DIOPTER, IMPLANTABLE COLLAMER LENS INTO THE PATIENT'S RIGHT EYE (OD) ON (B)(6) 2019. THE LENS WAS REMOVED ON (B)(6) 2019 DUE TO ELEVATED IOP (40MMHG) WITHOUT PUPIL BLOCK AND ANGLE CLOSURE AND EXCESSIVE VAULT. ON (B)(6) 2020 A SHORTER LENGHT LENS WAS IMPLANTED. THIS RESOLVED THE PROBLEM. CAUSE OF THE EV…	Lens Exchange	Resolved
https://www.accessdata.fda.gov/scripts/cdrh/cfdocs/cfMAUDE/Detail.CFM?MDRFOI__ID=9891527&pc=MTA	2023826-2020-00598	2020-03-04	Injury	STAAR SURGICAL COMPANY	2020-03-27	MTA	IMPLANTABLE COLLAMER LENS (ICL)	Inadequacy of Device Shape and/or Size	Intraocular Pressure Increased; No Code Available	P030016	NA	1	Event Description: THE REPORTER INDICATED THAT A 12.6MM, MICL12.6, -11.0 DIOPTER, IMPLANTABLE COLLAMER LENS WAS IMPLANTED INTO THE PATIENT'S LEFT EYE (OS) ON 26/FEB/2020. PUPIL BLOCK WITH ELEVATED IOP (48MMHG) AND ANGLE CLOSURE WITH ELEVATED IOP (48MMHG) WERE ASSESSED ON (B)(6) 2020, AND EXCESSIVE VAULT WAS OBSERVED. THE LENS WAS REMOVED AND REPLACED FOR A SHORTER LENGTH LENS ON (B)(6) 2020. THIS…	Lens Exchange	Resolved
https://www.accessdata.fda.gov/scripts/cdrh/cfdocs/cfMAUDE/Detail.CFM?MDRFOI__ID=9910966&pc=MTA	2023826-2020-00675	2020-03-06	Injury	STAAR SURGICAL COMPANY	2020-04-01	MTA	IMPLANTABLE COLLAMER LENS (ICL)	Inadequacy of Device Shape and/or Size	Intraocular Pressure Increased; No Code Available	P030016	NA	1	Event Description: THE REPORTER INDICATED THAT THE SURGEON IMPLANTED A 13.2MM MICL13.2 IMPLANTABLE COLLAMER LENS, -4.5 DIOPTER, INTO THE PATIENT'S LEFT (OS) EYE ON (B)(6) 2020. ON THE SAME DATE, IN A SEPARATE SURGERY, THE SURGEON EXCHANGED THE LENS WITH A SHORTER LENS DUE TO EXCESSIVE VAULT AND ELEVATED IOP. THE PROBLEM WAS RESOLVED. THE CAUSE OF THE EVENT IS REPORTED AS DEVICE "(SIZE)." Manufact…	Lens Exchange	Resolved
https://www.accessdata.fda.gov/scripts/cdrh/cfdocs/cfMAUDE/Detail.CFM?MDRFOI__ID=10214025&pc=MTA	2023826-2020-01383	2020-04-15	Injury	STAAR SURGICAL COMPANY	2020-06-30	MTA	IMPLANTABLE COLLAMER LENS (ICL)	Inadequacy of Device Shape and/or Size	Intraocular Pressure Increased; No Code Available	N/A	NA	1	Event Description: THE REPORTER INDICATED THAT A 13.2MM, VICMO13.2, -8.50 DIOPTER, IMPLANTABLE COLLAMER LENS, WAS IMPLANTED INTO THE PATIENTS LEFT EYE (OS) ON (B)(6) 2020. ON (B)(6) 2020 THE LENS EXPLANTED DUE TO EXCESSIVE VAULT AND ANGLE CLOSURE WITH ELEVATED IOP (INTRAOCULAR PRESSURE) AND THE PROBLEM RESOLVED. FOR STATUS OF THE EYE THE REPORTER STATED " THE CORNEA IS TRANSPARENT, THE PUPIL IS 3…	Lens Extraction	Resolved
https://www.accessdata.fda.gov/scripts/cdrh/cfdocs/cfMAUDE/Detail.CFM?MDRFOI__ID=7527986&pc=MTA	2023826-2018-00758	NA	Injury	STAAR SURGICAL COMPANY	2018-05-18	MTA	IMPLANTABLE COLLAMER LENS (ICL)	Inadequacy of Device Shape and/or Size	Intraocular Pressure Increased; No Code Available	NA	NA	1	Event Description: THE PATIENT REPORTED HAD AN ICL LENS IMPLANTED ON (B)(6) 2018 AND AT ONE DAY POST-OP HAD HIGH EYE PRESSURE. THE FACILITY REPORTED THE SURGEON IMPLANTED A 13.2MM VICMO13.2 IMPLANTABLE COLLAMER LENS, -11.50 DIOPTER, IN THE PATIENTS RIGHT EYE (OD), ON (B)(6) 2018. THE LENS WAS EXPLANTED ON (B)(6) 2018 DUE TO EXCESSIVE VAULTING. THE LENS WAS EXCHANGED FOR A SHORTER LENS AND THE PRO…	Lens Exchange	Resolved
https://www.accessdata.fda.gov/scripts/cdrh/cfdocs/cfMAUDE/Detail.CFM?MDRFOI__ID=8500521&pc=MTA	2023826-2019-00587	NA	Injury	STAAR SURGICAL COMPANY	2019-04-10	MTA	IMPLANTABLE COLLAMER LENS (ICL)	Inadequacy of Device Shape and/or Size	Intraocular Pressure Increased; No Code Available	P030016	NA	1	Event Description: THE REPORTER INDICATED THAT A 13.2MM, MICL13.2, -10.50 WAS IMPLANTED INTO THE PATIENTS RIGHT EYE (OD) ON (B)(6) 2019. ON (B)(6) 2019 THE LENS WAS REMOVED DUE TO EXCESSIVE VAULT AND PUPIL BLOCK WITH ELEVATED IOP (INTRAOCULAR PRESSURE). ADDITIONAL SURGICAL INTERVENTION (ENLARGEMENT OF PI OR ADDITION OF NEW PI/ YAG) WAS REPORTED TO BE PERFORMED. ON (B)(6) 2019 THE LENS WAS REPLACE…	Lens Exchange + Secondary Operation	Unknown
https://www.accessdata.fda.gov/scripts/cdrh/cfdocs/cfMAUDE/Detail.CFM?MDRFOI__ID=10013329&pc=MTA	2023826-2020-00963	NA	Injury	STAAR SURGICAL COMPANY	2020-04-30 04:00:00	MTA	IMPLANTABLE COLLAMER LENS (ICL)	Inadequacy of Device Shape and/or Size	Intraocular Pressure Increased; No Code Available	N/A	NA	1	Event Description: THE REPORTER INDICATED THAT THE SURGEON IMPLANTED A 13.2MM VICMO13.2, -18.00 DIOPTER, IMPLANTABLE COLLAMER LENS INTO THE PATIENT'S RIGHT EYE (OD) ON (B)(6) 2020. ELEVATED IOP (25 MMHG) WITHOUT PUPIL BLOCK AND ANGLE CLOSURE WERE OBSERVED ON (B)(6) 2020, EXCESSIVE VAULT, AND SIGNIFICANT REDUCTION OF IRIDO-CORNEAL ANGLES WERE OBSERVED. THE LENS WAS REMOVED AND EXCHANGED FOR A SHOR…	Lens Exchange	Resolved
https://www.accessdata.fda.gov/scripts/cdrh/cfdocs/cfMAUDE/Detail.CFM?MDRFOI__ID=10013330&pc=MTA	2023826-2020-00964	NA	Injury	STAAR SURGICAL COMPANY	2020-04-30 04:00:00	MTA	IMPLANTABLE COLLAMER LENS (ICL)	Inadequacy of Device Shape and/or Size	Intraocular Pressure Increased; No Code Available	N/A	NA	1	Event Description: THE REPORTER INDICATED THAT THE SURGEON IMPLANTED A 13.2MM VICMO13.2, -18.00 DIOPTER, IMPLANTABLE COLLAMER LENS INTO THE PATIENT'S LEFT EYE (OS) ON (B)(6) 2020. ELEVATED IOP (22 MMHG) WITHOUT PUPIL BLOCK AND ANGLE CLOSURE WERE OBSERVED ON (B)(6) 2020, EXCESSIVE VAULT, AND SIGNIFICANT REDUCTION OF IRIDO-CORNEAL ANGLES WERE OBSERVED. THE LENS WAS REMOVED AND EXCHANGED FOR A SHORT…	Lens Exchange	Resolved
https://www.accessdata.fda.gov/scripts/cdrh/cfdocs/cfMAUDE/Detail.CFM?MDRFOI__ID=9689153&pc=MTA	2023826-2020-00281	2019-12-17	Injury	STAAR SURGICAL COMPANY	2020-02-10	MTA	IMPLANTABLE COLLAMER LENS (ICL)	Inadequacy of Device Shape and/or Size; Adverse Event Without Identified Device or Use Problem	Intraocular Pressure Increased; No Code Available	P030016	NA	1	Event Description: THE REPORTER INDICATED THAT A 12.6MM, MICL12.6, -16.0 DIOPTER, IMPLANTABLE COLLAMER LENS WAS IMPLANTED INTO THE PATIENT'S LEFT EYE (OS) ON (B)(6) 2019. THE LENS WAS REMOVED ON (B)(6) 2019 "DUE TO EYE PRESSURE TOO HIGH." NO REPLACEMENT LENS IMPLANTED. ADDITIONAL INFORMATION HAS BEEN REQUESTED BUT NONE HAS BEEN FORTHCOMING. IF ADDITIONAL INFORMATION IS RECEIVED A SUPPLEMENTAL MED…	Lens Extraction	Unknown
https://www.accessdata.fda.gov/scripts/cdrh/cfdocs/cfMAUDE/Detail.CFM?MDRFOI__ID=9648851&pc=MTA	2023826-2020-00206	NA	Injury	STAAR SURGICAL COMPANY	2020-01-30 05:00:00	MTA	IMPLANTABLE COLLAMER LENS (ICL)	Inadequacy of Device Shape and/or Size; Adverse Event Without Identified Device or Use Problem; Unintended Movement	Intraocular Pressure Increased; No Code Available	P030016	NA	1	Event Description: A DAMAGED (TEAR ON HAPTIC) 13.2MM, MICL 13.2, -10.5 DIOPTER, IMPLANTABLE COLLAMER LENS WAS RETURNED TO STAAR. " OS (TANYA MOORE ) REPLACED OLD WITH NEW ICL", WAS HANDWRITTEN ON THE LENS PACKAGING BOX. ADDITIONAL INFORMATION HAS BEEN REQUESTED BUT NONE HAS BEEN FORTHCOMING. IF ADDITIONAL INFORMATION IS RECEIVED A SUPPLEMENTAL MEDWATCH REPORT WILL BE SUBMITTED.Event Description: …	Lens Exchange	Resolved
https://www.accessdata.fda.gov/scripts/cdrh/cfdocs/cfMAUDE/Detail.CFM?MDRFOI__ID=4554740&pc=MTA	2023826-2015-00134	2014-08-04	Injury	STAAR SURGICAL COMPANY	2015-02-27	MTA	VISIAN ICL (IMPLANTABLE COLLAMER LENS)	Inadequacy of Device Shape and/or Size; Appropriate Term/Code Not Available	Intraocular Pressure Increased; No Code Available	NA	NA	1	Event Description: THE REPORTER INDICATED THE SURGEON IMPLANTED A 12.6MM VICMO12.6 IMPLANTABLE COLLAMER LENS IN THE PATIENT'S LEFT EYE (OS) ON (B)(6) 2014. THE LENS WAS EXPLANTED THE NEXT DAY DUE TO ELEVATED IOP ASSOCIATED WITH EXCESSIVE VAULTING. SIGNIFICANT REDUCTION OF IRIDO-CORNEALS ANGLES WAS NOTED. THE LENS WAS EXCHANGED FOR A SHORTER LENS AND THE PROBLEM WAS RESOLVED. PATIENT'S LAST UCVA W…	Lens Exchange	Resolved
https://www.accessdata.fda.gov/scripts/cdrh/cfdocs/cfMAUDE/Detail.CFM?MDRFOI__ID=4599006&pc=MTA	2023826-2015-00303	2014-08-16	Injury	STAAR SURGICAL COMPANY	2015-03-13	MTA	ICL (IMPLANTABLE COLLAMER LENS)	Inadequacy of Device Shape and/or Size; Appropriate Term/Code Not Available	Intraocular Pressure Increased; No Code Available	P030016	NA	1	Event Description: THE REPORTER INDICATED THE SURGEON IMPLANTED A 12.5MM ICM125V4 IMPLANTABLE COLLAMER LENS IN THE PATIENT'S RIGHT EYE (OD) ON (B)(6) 2013. THE LENS WAS EXPLANTED ON (B)(6) 2014 DUE TO ELEVATED IOP ASSOCIATED EXCESSIVE VAULTING. THE LENS WAS EXCHANGED FOR A SHORTER LENS AND THE PROBLEM WAS RESOLVED. THE PATIENT'S POST-OP UCVA WAS 20/20._x000D_ Manufacturer Narrative: (B)(4). EVALU…	Lens Exchange	Resolved
https://www.accessdata.fda.gov/scripts/cdrh/cfdocs/cfMAUDE/Detail.CFM?MDRFOI__ID=5182255&pc=MTA	2023826-2015-01326	2014-11-05	Injury	STAAR SURGICAL COMPANY AG	2015-10-27	MTA	ICL (IMPLANTABLE COLLAMER LENS)	Inadequacy of Device Shape and/or Size; Appropriate Term/Code Not Available	Intraocular Pressure Increased; No Code Available	NA	NA	1	Event Description: THE REPORTER INDICATED THE SURGEON IMPLANTED A 13.7MM VICMO 13.7 IMPLANTABLE COLLAMER -13.50 DIOPTER LENS IN THE PATIENT'S LEFT EYE (OS) ON (B)(6) 2013. EXCESSIVE VAULTING ASSOCIATED WITH ELEVATED INTRAOCULAR PRESSURE WAS NOTED ON (B)(6) 2014. THE LENS WAS EXPLANTED AND EXCHANGED FOR A SHORTER LENS WITH A SIMILAR DIOPTER SIZE ON (B)(6) 2014. THIS RESOLVED THE PROBLEM. Manufactu…	Lens Exchange	Resolved
https://www.accessdata.fda.gov/scripts/cdrh/cfdocs/cfMAUDE/Detail.CFM?MDRFOI__ID=4629139&pc=MTA	2023826-2015-00375	2014-11-28	Injury	STAAR SURGICAL COMPANY	2015-03-24	MTA	ICL (IMPLANTABLE COLLAMER LENS)	Inadequacy of Device Shape and/or Size; Appropriate Term/Code Not Available	Intraocular Pressure Increased; No Code Available	NA	NA	1	Event Description: THE REPORTER INDICATED THE SURGEON IMPLANTED A 13.2MM VICMO13.2 IMPLANTABLE COLLAMER LENS IN THE PATIENT'S RIGHT EYE (OD) ON (B)(6) 2014. THE LENS WAS EXPLANTED ON (B)(6) 2014 DUE TO EXCESSIVE VAULTING AND ELEVATED INTRAOCULAR PRESSURE. THE LENS WAS EXCHANGED FOR A SHORTER LENS AND THE PROBLEM WAS RESOLVED._x000D_ Manufacturer Narrative: (B)(4): DEVICE EVALUATED BY MANUFACTURER…	Lens Exchange	Resolved
https://www.accessdata.fda.gov/scripts/cdrh/cfdocs/cfMAUDE/Detail.CFM?MDRFOI__ID=4574078&pc=MTA	2023826-2015-00240	2014-12-22	Injury	STAAR SURGICAL COMPANY	2015-03-05	MTA	VISIAN ICL (IMPLANTABLE COLLAMER LENS)	Inadequacy of Device Shape and/or Size; Appropriate Term/Code Not Available	Intraocular Pressure Increased; No Code Available	P030016	NA	1	Event Description: THE REPORTER INDICATED THE SURGEON IMPLANTED A 13.7MM MICL13.7 IMPLANTABLE COLLAMER LENS IN THE PATIENT'S LEFT EYE (OS) ON (B)(6) 2014. THE LENS WAS EXPLANTED ON (B)(6) 2015 DUE TO EXCESSIVE VAULTING. THE PATIENT EXPERIENCED ELEVATED INTRAOCULAR PRESSURE, NARROWING OF THE ANGLE AND ANGLE CLOSURE. THE LENS WAS EXCHANGED FOR A SHORTER LENS. THE PATIENT'S POST-OP BEST-CORRECTED VI…	Lens Exchange	Resolved
https://www.accessdata.fda.gov/scripts/cdrh/cfdocs/cfMAUDE/Detail.CFM?MDRFOI__ID=4574128&pc=MTA	2023826-2015-00241	2014-12-22	Injury	STAAR SURGICAL COMPANY AG	2015-03-05	MTA	VISIAN ICL (IMPLANTABLE COLLAMER LENS)	Inadequacy of Device Shape and/or Size; Appropriate Term/Code Not Available	Intraocular Pressure Increased; No Code Available	P030016	NA	1	Event Description: THE REPORTER INDICATED THE SURGEON IMPLANTED A 13.7MM MICL13.7 IMPLANTABLE COLLAMER LENS IN THE PATIENT'S RIGHT EYE (OD) ON (B)(6) 2014. THE LENS WAS EXPLANTED ON (B)(6) 2015 DUE TO EXCESSIVE VAULTING. THE PATIENT EXPERIENCED ELEVATED INTRAOCULAR PRESSURE, NARROWING OF THE ANGLE AND ANGLE CLOSURE. THE LENS WAS EXCHANGED FOR A SHORTER LENS. THE PATIENT'S POST-OP BEST-CORRECTED V…	Lens Exchange	Resolved
https://www.accessdata.fda.gov/scripts/cdrh/cfdocs/cfMAUDE/Detail.CFM?MDRFOI__ID=4513699&pc=MTA	2023826-2015-00151	2014-12-31	Injury	STAAR SURGICAL COMPANY	2015-02-12	MTA	ICL (IMPLANTABLE COLLAMER LENS)	Inadequacy of Device Shape and/or Size; Appropriate Term/Code Not Available	Intraocular Pressure Increased; No Code Available	P030016	NA	1	Event Description: THE REPORTER INDICATED THE SURGEON IMPLANTED A 12.0MM ICM120V4 IMPLANTABLE COLLAMER LENS IN THE PATIENT'S RIGHT EYE (OD) ON (B)(6) 2014 AND THE LENS WAS EXPLANTED DUE TO LOW VAULTING AND LOW OPACITY._x000D_ Manufacturer Narrative: (B)(4). Manufacturer Narrative: THERE IS NOT ENOUGH CLINICAL DATA TO DETERMINE THE EXACT CAUSE OF THE EVENT, HOWEVER, CANNOT RULE OUT LOW VAULTING SE…	Lens Extraction	Unknown
[truncated: 203 more rows]
