# Supplementary material for: Adverse events associated with Implantable Collamer Lens: insights from the FDA MAUDE database
Source: Front Med (Lausanne). 2025 Jul 21;12:1613060. doi: 10.3389/fmed.2025.1613060 (PMC12319018; doi:10.3389/fmed.2025.1613060)
Supplement: Supplementary file 11 [file Table_10.XLSX]

## Sheet: Lens-related Issue-1
Web Address...26	Report Number	Event Date	Event Type	Manufacturer	Date Received	Product Code	Brand Name	Device Problem	Patient Problem	PMA/PMN Number	Exemption Number	Number of Events	Event Text	Management	Outcomes
https://www.accessdata.fda.gov/scripts/cdrh/cfdocs/cfMAUDE/Detail.CFM?MDRFOI__ID=8197958&pc=MTA	2023826-2018-01925	2018-09-05	Injury	STAAR SURGICAL COMPANY	2018-12-26	MTA	IMPLANTABLE COLLAMER LENS (ICL)	Misfocusing; Inadequacy of Device Shape and/or Size; Device Dislodged or Dislocated; Adverse Event Without Identified Device or Use Problem	Blurred Vision; Capsular Bag Tear; No Code Available	N/A	NA	1	Event Description: THE REPORTER INDICATED THAT A VICMO13.2, -10.50 DIOPTER, IMPLANTABLE COLLAMER LENS WAS IMPLANTED INTO THE PATIENTS LEFT EYE (OS) ON (B)(6) 2018. A VAULT VALUE OF 0-50 WITH ROTATION AND CAPSULAR TEAR WAS REPORTED. ON (B)(6) 2018 THE LENS WAS EXCHANGED AND THE PROBLEM WAS RESOLVED. IN THE REPORTER OPINION THE CAUSE OF THIS EVENT WAS PATIENT RELATED FACTOR. ADDITIONAL INFORMATION …	Lens Exchange	Resolved
https://www.accessdata.fda.gov/scripts/cdrh/cfdocs/cfMAUDE/Detail.CFM?MDRFOI__ID=12973350&pc=MTA	2023826-2021-04716	2021-09-20	Injury	STAAR SURGICAL COMPANY	2021-12-09	MTA	IMPLANTABLE COLLAMER LENS (ICL)	Adverse Event Without Identified Device or Use Problem	Capsular Bag Tear	N/A	NA	1	Event Description: REPORTEDLY A 12.6MM VICM5_12.6 IMPLANTABLE COLLAMER LENS, -4.5 DIOPTER WAS NOT IMPLANTED INTO THE PATIENT'S LEFT EYE (OS), HOWEVER THE SURGEON REPORTS A CAPSULAR TEAR AND PHACO-EMULSIFICATION (CATARACT SURGERY) AND IOL IMPLANTATION. ATTEMPTS TO OBTAIN CLARIFICATION HAVE NOT BEEN SUCCESSFUL. Manufacturer Narrative: WEIGHT, ETHNICITY, RACE - UNK. PMA/510(K): THIS PRODUCT IS MANUF…	Lens Extraction + Secondary Operation	unknown
https://www.accessdata.fda.gov/scripts/cdrh/cfdocs/cfMAUDE/Detail.CFM?MDRFOI__ID=7481825&pc=MTA	2023826-2018-00636	2018-02-23	Injury	STAAR SURGICAL COMPANY	2018-05-02	MTA	IMPLANTABLE COLLAMER LENS (ICL)	Device Operates Differently Than Expected	Capsular Bag Tear; No Code Available	N/A	NA	1	Event Description: THE REPORTER INDICATED THAT THE SURGEON IMPLANT A 12.6 MM VICMO12.6, -13 DIOPTER, IMPLANTABLE COLLAMER LENS IN THE PATIENT'S RIGHT EYE (OD) ON (B)(6) 2018. THE LENS WAS EXPLANTED ON THE SAME DAY DUE TO CAPSULAR TEAR. ATTEMPTS AT OBTAINING ADDITIONAL INFORMATION HAVE NOT BEEN FORTHCOMING. Manufacturer Narrative: DEVICE EVALUATION: THE LENS WAS RETURNED DRY, IN A MICRO CENTRIFUGE…	Lens Extraction	unknown
https://www.accessdata.fda.gov/scripts/cdrh/cfdocs/cfMAUDE/Detail.CFM?MDRFOI__ID=5266114&pc=MTA	2023826-2015-01601	2014-06-04	Injury	STAAR SURGICAL COMPANY	2015-12-03	MTA	ICL (IMPLANTABLE COLLAMER LENS)	Device Operates Differently Than Expected; Appropriate Term/Code Not Available	Capsular Contracture; Cataract; No Code Available	P030016	NA	1	Event Description: THE REPORTER INDICATED THE SURGEON IMPLANTED A 11.5MM ICM115V4 -12.00 DIOPTER IMPLANTABLE COLLAMER LENS IN THE PATIENT'S RIGHT EYE (OD) ON (B)(6) 2008. A ANTERIOR SUBCAPSULAR CATARACT OPACITY WAS OBSERVED ON (B)(6) 2014. THE LENS WAS EXPLANTED ON (B)(6) 2015. NO OTHER LENS WAS IMPLANTED. Manufacturer Narrative: PRODUCT EVALUATION FOUND THAT THE LENS WAS RETURNED DRY IN THE LENS…	Lens Extraction	unknown
https://www.accessdata.fda.gov/scripts/cdrh/cfdocs/cfMAUDE/Detail.CFM?MDRFOI__ID=10158221&pc=MTA	2023826-2020-01234	2020-03-23	Injury	STAAR SURGICAL COMPANY	2020-06-16	MTA	IMPLANTABLE COLLAMER LENS (ICL)	Adverse Event Without Identified Device or Use Problem	Cataract	NA	NA	1	Event Description: THE REPORTER INDICATED THE SURGEON IMPLANTED A 13.2MM VICM5_13.2 IMPLANTABLE COLLAMER LENS, -05.00 DIOPTER, IN THE PATIENTS RIGHT EYE (OD) ON (B)(6) 2020. THE SURGEON NOTED AN ANTERIOR SUBCAPSULAR OPACITY IN THE PATIENTS PERIPHERY ON (B)(6) 2020. THE SURGEON DECIDED TO KEEP THE LENS IN THE EYE AND THE PATIENT IS HAPPY. THE LENS REMAINS IMPLANTED. THE CAUSE OF THE EVENT WAS UNKN…	Lens Retention	Resolved
https://www.accessdata.fda.gov/scripts/cdrh/cfdocs/cfMAUDE/Detail.CFM?MDRFOI__ID=13256324&pc=MTA	2023826-2022-00148	2020-10-08	Injury	STAAR SURGICAL COMPANY	2022-01-13	MTA	IMPLANTABLE COLLAMER LENS (ICL)	Adverse Event Without Identified Device or Use Problem	Cataract	N/A	NA	1	Event Description: THE REPORTER INDICATED THAT THE SURGEON IMPLANTED A 12.6MM VICMO12.6 IMPLANTABLE COLLAMER LENS, DIOPTER -18.0 INTO THE PATIENT'S LEFT EYE (OS) ON (B)(6) 2017. ON (B)(6) 2020_x000D_ THE LENS WAS EXPLANTED DUE TO LENS OPACITY-ASC/PSC. PHACO-EMULSIFICATION (CCATARACT SURGERY) AND IOL IMPLANTATION WAS PERFORMED AND THE PROBLEM WAS RESOLVED. THE CAUSE OF THE EVENT IS REPORTED AS UNK…	Lens Extraction + Secondary Operation	Resolved
https://www.accessdata.fda.gov/scripts/cdrh/cfdocs/cfMAUDE/Detail.CFM?MDRFOI__ID=10980707&pc=MTA	2023826-2020-02950	2020-10-15	Injury	STAAR SURGICAL COMPANY	2020-12-09	MTA	IMPLANTABLE COLLAMER LENS (ICL)	Adverse Event Without Identified Device or Use Problem	Cataract	NA	NA	1	Event Description: THE REPORTER INDICATED THAT A 12.0MM, ICM120V4, -15.0 DIOPTER, IMPLANTABLE COLLAMER LENS WAS IMPLANTED INTO THE PATIENTS RIGHT EYE (OD) IN 2003. ASC LEN OPACITY WAS OBSERVED ON (B)(6) 2020, 17 YEARS AFTER ICL IMPLANTATION. THE REPORTER STATED " NO FURTHER STEPS ARE NEEDED WITH OD, BECAUSE THEY INTERNALLY SWITCHED OD <-> OS. SO WITH OD ALL IS FINE." . ADDITIONAL INFORMATION HAS …	Lens Retention	unknown
https://www.accessdata.fda.gov/scripts/cdrh/cfdocs/cfMAUDE/Detail.CFM?MDRFOI__ID=11366535&pc=MTA	2023826-2021-00476	2021-02-10	Injury	STAAR SURGICAL COMPANY	2021-02-23	MTA	IMPLANTABLE COLLAMER LENS (ICL)	Adverse Event Without Identified Device or Use Problem	Cataract	P030016	NA	1	Event Description: THE REPORTER INDICATED THAT THE SURGEON IMPLANTED A 12.1MM MICL12.1 IMPLANTABLE COLLAMER LENS, -14.0 DIOPTER, INTO THE PATIENT'S EYE IN (B)(6) 2007. REPORTEDLY, THE PATIENT DEVELOPED A CATARACT. ATTEMPTS TO OBTAIN ADDITIONAL INFORMATION HAVE NOT BEEN SUCCESSFUL. Manufacturer Narrative: B5-UPDATED INFO: THE PATIENT DEVELOPED A CATARACT ASC IN THE LEFT (OS) EYE 13-14 YEARS AFTER …	Lens Extraction + Secondary Operation	unknown
https://www.accessdata.fda.gov/scripts/cdrh/cfdocs/cfMAUDE/Detail.CFM?MDRFOI__ID=11366550&pc=MTA	2023826-2021-00475	2021-02-10	Injury	STAAR SURGICAL COMPANY	2021-02-23	MTA	IMPLANTABLE COLLAMER LENS (ICL)	Adverse Event Without Identified Device or Use Problem	Cataract	P030016	NA	1	Event Description: THE REPORTER INDICATED THAT THE SURGEON IMPLANTED A 12.1MM MICL12.1 IMPLANTABLE COLLAMER LENS, -13.5 DIOPTER, INTO THE PATIENT'S EYE IN (B)(6) 2007. REPORTEDLY, THE PATIENT DEVELOPED A CATARACT. ATTEMPTS TO OBTAIN ADDITIONAL INFORMATION HAVE NOT BEEN SUCCESSFUL. Manufacturer Narrative: B5-UPDATED INFO: IN (B)(6) 2021 THE LENS WAS EXPLANTED FROM THE RIGHT (OD) EYE DUE TO LENS OP…	Lens Extraction + Secondary Operation	unknown
https://www.accessdata.fda.gov/scripts/cdrh/cfdocs/cfMAUDE/Detail.CFM?MDRFOI__ID=12523570&pc=MTA	2023826-2021-03689	2021-05-26	Injury	STAAR SURGICAL COMPANY	2021-09-23	MTA	IMPLANTABLE COLLAMER LENS	Adverse Event Without Identified Device or Use Problem	Cataract	P030016	NA	1	Event Description: THE REPORTER STATES A 12.6MM MICL12.6 IMPLANTABLE COLLAMER LENS -13.5 DIOPTER WAS IMPLANTED INTO THE PATIENT'S LEFT (OS) EYE ON (B)(6) 2018. REPORTEDLY ON (B)(6) 2021 THE LENS WAS EXPLANTED DUE TO A CATARACT FORMING. Manufacturer Narrative: H3 - DEVICE EVALUATION: THE LENS WAS RETURNED DRY IN GAUZE. VISUAL INSPECTION FOUND THE HAPTIC TORN WITH DEBRIS THROUGHOUT THE LENS. CLAIM …	Lens Extraction	unknown
https://www.accessdata.fda.gov/scripts/cdrh/cfdocs/cfMAUDE/Detail.CFM?MDRFOI__ID=12872783&pc=MTA	2023826-2021-04489	2021-06-18	Injury	STAAR SURGICAL COMPANY	2021-11-24	MTA	IMPLANTABLE COLLAMER LENS (ICL)	Adverse Event Without Identified Device or Use Problem	Cataract	NA	NA	1	Event Description: THE REPORTER INDICATED THE SURGEON IMPLANTED A 13.2MM VICMO13.2 IMPLANTABLE COLLAMER LENS, -10.00 DIOPTER, INTO THE PATIENTS RIGHT EYE (OD), ON (B)(6) 2015. THE LENS WAS EXPLANTED ON (B)(6) 2021 DUE TO A NS (NUCLEAR SCLEROTIC) CATARACT WAS OBSERVED AND THE PROBLEM WAS RESOLVED. THE CAUSE OF THE EVENT WAS DUE TO THE DEVICE. ADDITIONAL INFORMATION HAS BEEN REQUESTED BUT NONE HAS …	Lens Extraction	Resolved
https://www.accessdata.fda.gov/scripts/cdrh/cfdocs/cfMAUDE/Detail.CFM?MDRFOI__ID=12875660&pc=MTA	2023826-2021-04490	2021-06-18	Injury	STAAR SURGICAL COMPANY	2021-11-25	MTA	IMPLANTABLE COLLAMER LENS (ICL)	Adverse Event Without Identified Device or Use Problem	Cataract	NA	NA	1	Event Description: THE REPORTER INDICATED THE SURGEON IMPLANTED A 13.2MM VICMO13.2 IMPLANTABLE COLLAMER LENS, -11.00 DIOPTER, INTO THE PATIENTS LEFT EYE (OS), ON (B)(6) 2015. THE LENS WAS EXPLANTED ON (B)(6) 2021 DUE TO A NS (NUCLEAR SCLEROTIC) CATARACT WAS OBSERVED AND THE PROBLEM WAS RESOLVED. THE CAUSE OF THE EVENT WAS DUE TO THE DEVICE. ADDITIONAL INFORMATION HAS BEEN REQUESTED BUT NONE HAS B…	Lens Extraction	Resolved
https://www.accessdata.fda.gov/scripts/cdrh/cfdocs/cfMAUDE/Detail.CFM?MDRFOI__ID=12783787&pc=MTA	2023826-2021-04216	2021-06-21	Injury	STAAR SURGICAL COMPANY	2021-11-09	MTA	IMPLANTABLE COLLAMER LENS (ICL)	Adverse Event Without Identified Device or Use Problem	Cataract	NA	NA	1	Event Description: THE REPORTER INDICATED THE SURGEON IMPLANTED A 13.2MM VICM5_13.2 IMPLANTABLE COLLAMER LENS, -09.00 DIOPTER, INTO THE PATIENTS RIGHT EYE (OD) ON (B)(6) 2021. THE LENS WAS EXPLANTED ON (B)(6) 2021 DUE TO LENS OPACITY (ANTERIOR SUBCAPSULAR CATARACT) WAS OBSERVED. CATARACT SURGERY WAS PERFORMED AND AN IOL WAS IMPLANTED. THE PROBLEM WAS RESOLVED. Manufacturer Narrative: WEIGHT: UNK.…	Lens Extraction + Secondary Operation	Resolved
https://www.accessdata.fda.gov/scripts/cdrh/cfdocs/cfMAUDE/Detail.CFM?MDRFOI__ID=13022168&pc=MTA	2023826-2021-04813	2021-10-06	Injury	STAAR SURGICAL COMPANY	2021-12-16	MTA	IMPLANTABLE COLLAMER LENS (ICL)	Adverse Event Without Identified Device or Use Problem	Cataract	NA	NA	1	Event Description: THE REPORTER INDICATED THE SURGEON IMPLANTED A 13.2MM VICM5_13.2 IMPLANTABLE COLLAMER LENS, -08.00 DIOPTER, INTO THE PATIENTS LEFT EYE (OS) ON (B)(6) 2021. THE LENS WAS EXPLANTED ON (B)(6) 2021 DUE TO AN ANTERIOR SUBCAPSULAR CATARACT (ASC) WAS OBSERVED. PHACO-EMULSIFICATION (CATARACT) SURGERY WAS PERFORMED AND AN IOL WAS IMPLANTED. THE PROBLEM WAS RESOLVED. THE CAUSE OF THE EVE…	Lens Extraction + Secondary Operation	Resolved
https://www.accessdata.fda.gov/scripts/cdrh/cfdocs/cfMAUDE/Detail.CFM?MDRFOI__ID=14722040&pc=MTA	2023826-2022-01933	2022-05-09	Malfunction	STAAR SURGICAL COMPANY	2022-06-16	MTA	IMPLANTABLE COLLAMER LENS (ICL)	Adverse Event Without Identified Device or Use Problem	Cataract	P030016	NA	1	Event Description: THE REPORTER INDICATED THAT THE SURGEON IMPLANTED A 12.1MM VICM5_12.1; -11.5 DIOPTER IMPLANTABLE COLLAMER LENS INTO THE PATIENT'S RIGHT EYE (OD) ON (B)(6) 2020. IT WAS REPORTED THAT THE PATIENT HAS LENS OPACITY (CATARACT ASC). IT WAS ALSO NOTED "THE INVESTIGATOR DISCUSSED THE DEVELOPMENT OF ANTERIOR SUBCAPSULAR OPACITIES WITH THE PATIENT AND THE DECISION WAS MADE TO MONITOR THE…	Lens Retention	Not_Resolved
https://www.accessdata.fda.gov/scripts/cdrh/cfdocs/cfMAUDE/Detail.CFM?MDRFOI__ID=14881811&pc=MTA	2023826-2022-02099	2022-06-14	Malfunction	STAAR SURGICAL COMPANY	2022-06-30	MTA	IMPLANTABLE COLLAMER LENS (ICL)	Adverse Event Without Identified Device or Use Problem	Cataract	P030016	NA	1	Event Description: THE REPORTER INDICATED THAT THE SURGEON IMPLANTED A 13.2MM VICMO13.2; -14.50 DIOPTER IMPLANTABLE COLLAMER LENS INTO THE PATIENT'S RIGHT EYE (OD) ON (B)(6) 2020. THE PATIENT EXPERIENCED LENS OPACITY (ANTERIOR SUBCAPSULAR OPACITIES) WHICH WAS OBSERVED ON (B)(6) 2022 AND NOTICED IN THE LENS PERIPHERY AT APPROXIMATELY 4 O'CLOCK WHICH WAS DISCOVERED ON SLIT LAMP EXAMINATION. IT WAS …	Lens Retention	Not_Resolved
https://www.accessdata.fda.gov/scripts/cdrh/cfdocs/cfMAUDE/Detail.CFM?MDRFOI__ID=17637143&pc=MTA	2023826-2023-03752	2023-07-19	Injury	STAAR SURGICAL COMPANY	2023-08-28	MTA	IMPLANTABLE COLLAMER LENS (ICL)	Adverse Event Without Identified Device or Use Problem	Cataract	P030016	NA	1	Event Description: THE REPORTER INDICATED THAT THE SURGEON IMPLANTED A 12.6MM MICL12.6; -16.0 DIOPTER IMPLANTABLE COLLAMER LENS INTO THE PATIENT'S EYE ON (B)(6) 2015. IT WAS INDICATED THE PATIENT DEVELOPED A CATARACT AND ON (B)(6) 2023 THE LENS WAS EXPLANTED. THE CAUSE OF THE EVENT WAS REPORTED AS UNKNOWN. Manufacturer Narrative: H6 - TYPE OF INVESTIGATION: 4110 - LENS WORK ORDER SEARCH: NO SIMIL…	Lens Extraction	unknown
https://www.accessdata.fda.gov/scripts/cdrh/cfdocs/cfMAUDE/Detail.CFM?MDRFOI__ID=18048071&pc=MTA	2023826-2023-04719	2023-09-25	Injury	STAAR SURGICAL COMPANY	2023-11-01	MTA	IMPLANTABLE COLLAMER LENS (ICL)	Adverse Event Without Identified Device or Use Problem	Cataract	N/A	NA	1	Event Description: THE REPORTER INDICATED THAT A 13.2MM, MICL13.2, -16.0 DIOPTER, IMPLANTABLE COLLAMER LENS WAS IMPLANTED INTO THE PATIENT'S EYE. CATARACTS WAS OBSERVED. LENS REMAINS IMPLANTED. ADDITIONAL INFORMATION HAS BEEN REQUESTED BUT NONE HAS BEEN FORTHCOMING.Event Description: THE REPORTER INDICATED THAT A 13.2MM, MICL13.2, -16.0 DIOPTER, IMPLANTABLE COLLAMER LENS WAS IMPLANTED INTO THE PA…	Lens Extraction	unknown
https://www.accessdata.fda.gov/scripts/cdrh/cfdocs/cfMAUDE/Detail.CFM?MDRFOI__ID=18223150&pc=MTA	2023826-2023-05380	2023-11-15	Injury	STAAR SURGICAL COMPANY	2023-11-28	MTA	IMPLANTABLE COLLAMER LENS (ICL)	Adverse Event Without Identified Device or Use Problem	Cataract	P030016	NA	1	Event Description: THE REPORTER INDICATED THAT THE SURGEON IMPLANTED A 13.2MM VICM5_13.2; -3.0 DIOPTER IMPLANTABLE COLLAMER LENS INTO THE PATIENT'S LEFT EYE (OS) ON (B)(6) 2023. THE PATIENT HAD LENS OPACITY, ASC/NS WHICH WAS OBSERVED ON (B)(6) 2023. ON (B)(6) 2023, THE LENS WAS EXPLANTED AND CATARACT WITH A POSTERIOR CHAMBER LENS WAS PERFORMED WAS ADDITIONALLY REPORTED. Manufacturer Narrative: H6…	Lens Extraction + Secondary Operation	unknown
https://www.accessdata.fda.gov/scripts/cdrh/cfdocs/cfMAUDE/Detail.CFM?MDRFOI__ID=6176027&pc=MTA	2023826-2016-01771	NA	Injury	STAAR SURGICAL COMPANY	2016-12-15	MTA	ICL (IMPLANTABLE COLLAMER LENS)	Adverse Event Without Identified Device or Use Problem	Cataract	P030016	NA	1	Event Description: THE PATIENT REPORTED THE SURGEON IMPLANTED A 12.1MM MICL12.1 IMPLANTABLE COLLAMER LENS, -12.5 DIOPTER, IN HIS LEFT EYE (OS). THE PATIENT REPORTED A CATARACT HAD DEVELOPED BUT THERE WAS NO VISION LOSS. THE ICL REMAINS IMPLANTED. ADDITIONAL INFORMATION HAS BEEN REQUESTED BUT NONE HAS BEEN FORTHCOMING. IF ADDITIONAL INFORMATION IS RECEIVED, A SUPPLEMENTAL MEDWATCH REPORT WILL BE S…	Lens Retention	unknown
https://www.accessdata.fda.gov/scripts/cdrh/cfdocs/cfMAUDE/Detail.CFM?MDRFOI__ID=9441180&pc=MTA	2023826-2019-02346	NA	Injury	STAAR SURGICAL COMPANY	2019-12-09	MTA	IMPLANTABLE COLLAMER LENS (ICL)	Adverse Event Without Identified Device or Use Problem	Cataract	P030016	NA	1	Event Description: THE REPORTER INDICATED THAT THE SURGEON IMPLANTED A 13.2MM MICL13.2 IMPLANTABLE COLLAMER LENS, -5.5 DIOPTER, INTO THE PATIENT'S LEFT (OS) EYE ON (B)(6) 2018. REPORTEDLY, THE PATIENT DEVELOPED A CATARACT. IT IS UNKNOWN AS TO WHETHER THE LENS REMAINS IMPLANTED; ATTEMPTS TO OBTAIN ADDITIONAL INFORMATION HAVE NOT BEEN SUCCESSFUL. Manufacturer Narrative: NO SIMILAR COMPLAINT TYPE EV…	unknown	unknown
https://www.accessdata.fda.gov/scripts/cdrh/cfdocs/cfMAUDE/Detail.CFM?MDRFOI__ID=9441184&pc=MTA	2023826-2019-02345	NA	Injury	STAAR SURGICAL COMPANY	2019-12-09	MTA	IMPLANTABLE COLLAMER LENS (ICL)	Adverse Event Without Identified Device or Use Problem	Cataract	P030016	NA	1	Event Description: THE REPORTER INDICATED THAT THE SURGEON IMPLANTED A 13.2MM MICL13.2 IMPLANTABLE COLLAMER LENS, -5.5 DIOPTER, INTO THE PATIENT'S RIGHT (OD) EYE. REPORTEDLY, THE PATIENT DEVELOPED A CATARACT. IT IS UNKNOWN AS TO WHETHER THE LENS REMAINS IMPLANTED; ATTEMPTS TO OBTAIN ADDITIONAL INFORMATION HAVE NOT BEEN SUCCESSFUL. Manufacturer Narrative: NO SIMILAR COMPLAINT TYPE EVENTS REPORTED …	unknown	unknown
https://www.accessdata.fda.gov/scripts/cdrh/cfdocs/cfMAUDE/Detail.CFM?MDRFOI__ID=10158238&pc=MTA	2023826-2020-01236	NA	Injury	STAAR SURGICAL COMPANY	2020-06-16 04:00:00	MTA	IMPLANTABLE COLLAMER LENS (ICL)	Adverse Event Without Identified Device or Use Problem	Cataract	NA	NA	1	Event Description: THE REPORTER INDICATED THE SURGEON IMPLANTED A 12.1MM VICM5_12.1 IMPLANTABLE COLLAMER LENS, -08.00 DIOPTER, IN THE PATIENTS RIGHT EYE (OD) ON (B)(6) 2018. THE SURGEON NOTED AN ANTERIOR SUBCAPSULAR OPACITY IN THE PATIENTS PERIPHERY 2 - 3 WEEKS AFTER SURGERY. THE SURGEON DECIDED TO KEEP THE LENS IN THE EYE AND THE PATIENT IS HAPPY. THE LENS REMAINS IMPLANTED. THE CAUSE OF THE EVE…	Lens Retention	Resolved
https://www.accessdata.fda.gov/scripts/cdrh/cfdocs/cfMAUDE/Detail.CFM?MDRFOI__ID=10158240&pc=MTA	2023826-2020-01237	NA	Injury	STAAR SURGICAL COMPANY	2020-06-16 04:00:00	MTA	IMPLANTABLE COLLAMER LENS (ICL)	Adverse Event Without Identified Device or Use Problem	Cataract	NA	NA	1	Event Description: THE REPORTER INDICATED THE SURGEON IMPLANTED A 12.6MM VICM5_12.6 IMPLANTABLE COLLAMER LENS, -09.50 DIOPTER, IN THE PATIENTS LEFT EYE (OS) ON (B)(6) 2018. THE SURGEON NOTED AN ANTERIOR SUBCAPSULAR OPACITY IN THE PATIENTS PERIPHERY 2 - 3 WEEKS AFTER INITIAL SURGERY. THE SURGEON DECIDED TO KEEP THE LENS IN THE EYE AND THE PATIENT IS HAPPY. THE LENS REMAINS IMPLANTED. THE CAUSE OF …	Lens Retention	Resolved
https://www.accessdata.fda.gov/scripts/cdrh/cfdocs/cfMAUDE/Detail.CFM?MDRFOI__ID=12641181&pc=MTA	2023826-2021-04028	NA	Injury	STAAR SURGICAL COMPANY	2021-10-15	MTA	IMPLANTABLE COLLAMER LENS (ICL)	Adverse Event Without Identified Device or Use Problem	Cataract	NA	NA	1	Event Description: THE REPORTER INDICATED THE SURGEON IMPLANTED A 13.2MM VICMO13.2 IMPLANTABLE COLLAMER LENS, -11.00 DIOPTER, INTO THE PATIENTS RIGHT EYE (OD). POST-OPERATIVE OBSERVATION SHOWED THE DEVELOPMENT OF CATARACT. THE REFRACTIVE RESULT IS STABLE. THE LENS REMAINED IMPLANTED. THIS WAS THE REPLACEMENT LENS FOR MFR. REPORT # 2023826-2021-03029. ADDITIONAL INFORMATION HAS BEEN REQUESTED BUT …	Lens Exchange	unknown
https://www.accessdata.fda.gov/scripts/cdrh/cfdocs/cfMAUDE/Detail.CFM?MDRFOI__ID=14121142&pc=MTA	2023826-2022-01174	NA	Injury	STAAR SURGICAL COMPANY	2022-04-15 04:00:00	MTA	IMPLANTABLE COLLAMER LENS (ICL)	Adverse Event Without Identified Device or Use Problem	Cataract	NA	NA	1	Event Description: THE REPORTER INDICATED THE SURGEON IMPLANTED AN ICL IMPLANTABLE COLLAMER LENS, -21.00 DIOPTER IN THE PATIENTS LEFT EYE (OS). AT ONE YEAR POST-OP, THE EYE DEVELOPED A VISUALLY SIGNIFICANT ANTERIOR SUBCAPSULAR CATARACT. THE PATIENT UNDERWENT PHACO ASPIRATION OF THE CATARACT WITH ICL IN SITU AND A STANDARD POWER PCIOL WAS IMPLANTED. ONE YEAR AFTER THE LEFT EYE CATARACT SURGERY, TH…	Lens Extraction + Secondary Operation	unknown
https://www.accessdata.fda.gov/scripts/cdrh/cfdocs/cfMAUDE/Detail.CFM?MDRFOI__ID=14138558&pc=MTA	2023826-2022-01175	NA	Injury	STAAR SURGICAL COMPANY	2022-04-18 04:00:00	MTA	IMPLANTABLE COLLAMER LENS (ICL)	Adverse Event Without Identified Device or Use Problem	Cataract	NA	NA	1	Event Description: THE REPORTER INDICATED THE SURGEON IMPLANTED AN ICL IMPLANTABLE COLLAMER LENS, -21.00 DIOPTER IN THE PATIENT'S RIGHT EYE (OD). EIGHT YEARS POST-OP, THE EYE DEVELOPED AN ANTERIOR SUBCAPSULAR CATARACT. THE PATIENT UNDERWENT PHACOASPIRATION OF THE CATARACT WITH ICL IN SITU AND A SINGLE PIECE HYDROPHOBIC PCIOL WAS IMPLANTED. ONE YEAR AFTER THE RIGHT EYE CATARACT SURGERY, THE PATIEN…	Lens Extraction + Secondary Operation	unknown
https://www.accessdata.fda.gov/scripts/cdrh/cfdocs/cfMAUDE/Detail.CFM?MDRFOI__ID=15621351&pc=MTA	2023826-2022-03696	NA	Injury	STAAR SURGICAL COMPANY	2022-10-18 04:00:00	MTA	IMPLANTABLE COLLAMER LENS (ICL)	Adverse Event Without Identified Device or Use Problem	Cataract	P030016	NA	1	Event Description: THE REPORTER INDICATED THAT THE SURGEON IMPLANTED A 13.7MM MICL13.7; -15.0 DIOPTER IMPLANTABLE COLLAMER LENS INTO THE PATIENT'S RIGHT EYE (OD) ON (B)(6) 2021. THE SURGEON REPORTS THE PATIENT HAS DEVELOPED POSTERIOR CAPSULAR CATARACTS. LENS REMAINS IMPLANTED. ATTEMPTS TO OBTAIN ADDITIONAL INFORMATION HAVE NOT BEEN SUCCESSFUL. IF ADDITIONAL INFORMATION IS RECEIVED A SUPPLEMENTAL …	Lens Retention	unknown
https://www.accessdata.fda.gov/scripts/cdrh/cfdocs/cfMAUDE/Detail.CFM?MDRFOI__ID=15621428&pc=MTA	2023826-2022-03697	NA	Injury	STAAR SURGICAL COMPANY	2022-10-18 04:00:00	MTA	IMPLANTABLE COLLAMER LENS (ICL)	Adverse Event Without Identified Device or Use Problem	Cataract	P030016	NA	1	Event Description: THE REPORTER INDICATED THAT THE SURGEON IMPLANTED A 13.7MM MICL13.7; -15.0 DIOPTER IMPLANTABLE COLLAMER LENS INTO THE PATIENT'S RIGHT LEFT (OS) ON (B)(6) 2021. THE SURGEON REPORTS THE PATIENT HAS DEVELOPED POSTERIOR CAPSULAR CATARACTS. LENS REMAINS IMPLANTED. ATTEMPTS TO OBTAIN ADDITIONAL INFORMATION HAVE NOT BEEN SUCCESSFUL. IF ADDITIONAL INFORMATION IS RECEIVED A SUPPLEMENTAL…	Lens Retention	unknown
https://www.accessdata.fda.gov/scripts/cdrh/cfdocs/cfMAUDE/Detail.CFM?MDRFOI__ID=17674548&pc=MTA	2023826-2023-03841	NA	Injury	STAAR SURGICAL COMPANY	2023-09-01 04:00:00	MTA	IMPLANTABLE COLLAMER LENS (ICL)	Adverse Event Without Identified Device or Use Problem	Cataract	P030016	NA	1	Event Description: THE REPORTER INDICATED THAT THE SURGEON IMPLANTED A 12.1MM MICL12.1, -15.5 DIOPTER IMPLANTABLE COLLAMER LENS INTO THE PATIENT'S EYE ON (B)(6) 2013. THE LENS WAS EXPLANTED ON (B)(6) 2023, DUE TO THE PATIENT DEVELOPING A CATARACT. ATTEMPTS TO OBTAIN ADDITIONAL INFORMATION HAVE NOT BEEN SUCCESSFUL. IF ADDITIONAL INFORMATION IS RECEIVED A SUPPLEMENTAL MEDWATCH REPORT WILL BE SUBMIT…	Lens Extraction	unknown
https://www.accessdata.fda.gov/scripts/cdrh/cfdocs/cfMAUDE/Detail.CFM?MDRFOI__ID=10899883&pc=MTA	2023826-2020-02746	NA	Injury	STAAR SURGICAL COMPANY AG	2020-11-25 05:00:00	MTA	IMPLANTABLE COLLAMER LENS (ICL)	Adverse Event Without Identified Device or Use Problem	Cataract	NA#S-P#NA	NA	1	Event Description: THE REPORTER INDICATED THAT THE SURGEON IMPLANTED A 12.0MM ICM120V4 IMPLANTABLE COLLAMER LENS, -14.00 DIOPTER, IN THE PATIENTS RIGHT EYE (OD) ON (B)(6) 2013. THE REPORTER INDICATED A CATARACT HAD DEVELOPED. THE LENS REMAINED IMPLANTED. IF ADDITIONAL INFORMATION IS RECEIVED, A SUPPLEMENTAL MEDWATCH WILL BE SUBMITTED. Manufacturer Narrative: B5: THE LENS WAS EXPLANTED ON (B)(6) 2…	Lens Extraction	unknown
https://www.accessdata.fda.gov/scripts/cdrh/cfdocs/cfMAUDE/Detail.CFM?MDRFOI__ID=4601473&pc=MTA	2023826-2015-00297	2013-11-25	Injury	STAAR SURGICAL COMPANY	2015-03-13	MTA	ICL (IMPLANTABLE COLLAMER LENS)	Appropriate Term/Code Not Available	Cataract	P030016	NA	1	Event Description: THE REPORTER INDICATED THE SURGEON IMPLANTED A 12.0MM ICM120V4 IMPLANTABLE COLLAMER LENS IN THE PATIENT'S LEFT EYE (OS) ON (B)(6) 2013. THE LENS WAS EXPLANTED ON (B)(6) 2014 DUE TO LENS OPACITY (ANTERIOR SUBCAPSULAR) AND WAS NOT REPLACED. SEE MFR REPORT #2023826-2015-00296 FOR THE OTHER EYE. Manufacturer Narrative: PT WEIGHT: UNK. (B)(4). DEVICE EVALUATED BY MANUFACTURER? NO. L…	Lens Extraction	Resolved
https://www.accessdata.fda.gov/scripts/cdrh/cfdocs/cfMAUDE/Detail.CFM?MDRFOI__ID=4601598&pc=MTA	2023826-2015-00296	2013-11-25	Injury	STAAR SURGICAL COMPANY	2015-03-13	MTA	ICL (IMPLANTABLE COLLAMER LENS)	Appropriate Term/Code Not Available	Cataract	P030016	NA	1	Event Description: THE REPORTER INDICATED THE SURGEON IMPLANTED A 12.0MM ICM120V4 IMPLANTABLE COLLAMER LENS IN THE PATIENT'S RIGHT EYE (OD) ON (B)(6) 2013. THE LENS WAS EXPLANTED ON (B)(6) 2014 DUE TO LENS OPACITY (ANTERIOR SUBCAPSULAR) AND WAS NOT REPLACED. Manufacturer Narrative: (B)(4) - CATARACT, INDUCED; (LENS EXPLANTED). DEVICE EVALUATED BY MANUFACTURER? NO. LENS NOT RETURNED. (B)(4).	Lens Extraction	Resolved
https://www.accessdata.fda.gov/scripts/cdrh/cfdocs/cfMAUDE/Detail.CFM?MDRFOI__ID=14598784&pc=MTA	2023826-2022-01733	2022-03-25	Injury	STAAR SURGICAL COMPANY	2022-06-03	MTA	IMPLANTABLE COLLAMER LENS (ICL)	Appropriate Term/Code Not Available	Cataract	P030016	NA	1	Event Description: THE REPORTER INDICATED THAT A 13.7MM VICM5 13.7 IMPLANTABLE COLLAMER LENS OF -8.50 DIOPTER WAS IMPLANTED INTO THE PATIENTS RIGHT EYE (OD) ON (B)(6) 2022. ON (B)(6) 2022 THE LENS WAS REMOVED DUE TO LENS OPACITY (CATARACT); ANTERIOR SUBCAPSULAR CATARACTS (ASC). THE PROBLEM WAS RESOLVED. PATIENT HAD A CATARACT SURGERY WITH PSEUDOPHAKIC IOL IMPLANTATION. CAUSE REPORTED AS USER ERRO…	Lens Extraction + Secondary Operation	Resolved
https://www.accessdata.fda.gov/scripts/cdrh/cfdocs/cfMAUDE/Detail.CFM?MDRFOI__ID=6303780&pc=MTA	2023826-2017-00133	2016-06-04	Injury	STAAR SURGICAL COMPANY	2017-02-06	MTA	ICL (IMPLANTABLE COLLAMER LENS)	Device Operates Differently Than Expected	Cataract	N/A	NA	1	Event Description: THE REPORTER INDICATED THAT THE SURGEON IMPLANTED A 12.6MM VICMO12.6 IMPLANTABLE COLLAMER LENS, -13.0 DIOPTER, IN THE PATIENT'S RIGHT EYE (OD) ON (B)(6) 2016. THE LENS WAS EXPLANTED ON (B)(6) 2016 DUE TO LENS OPACITY ASCO (ANTERIOR SUBCAPSULAR OPACITY), WHICH WAS OBSERVED ON (B)(6) 2016. ON PATIENT'S LAST VISIT ON (B)(6) 2016, THE PATIENT'S BEST CORRECTED VISUAL ACUITY WAS 20/3…	Lens Extraction	Resolved
https://www.accessdata.fda.gov/scripts/cdrh/cfdocs/cfMAUDE/Detail.CFM?MDRFOI__ID=7648707&pc=MTA	2023826-2018-00976	NA	Injury	STAAR SURGICAL COMPANY AG	2018-06-28	MTA	IMPLANTABLE COLLAMER LENS (ICL)	Device Operates Differently Than Expected	Cataract	P030016	NA	1	Event Description: THE REPORTER INDICATED THAT THE SURGEON WILL BE REMOVING A 13.2MM, MICL13.2, -9.0 DIOPTER, IMPLANTABLE COLLAMER LENS BECAUSE THE PATIENT HAS A CATARACT. ON (B)(6) 2018 THE REPORTER STATED THAT THE LENS REMAINS IMPLANTED, LENS REMOVAL HAS NOT BEEN PERFORMED. ADDITIONAL INFORMATION HAS BEEN REQUESTED BUT NONE HAS BEEN FORTHCOMING. IF ADDITIONAL INFORMATION IS RECEIVED, A SUPPLEME…	Lens Retention	unknown
https://www.accessdata.fda.gov/scripts/cdrh/cfdocs/cfMAUDE/Detail.CFM?MDRFOI__ID=12213000&pc=MTA	2023826-2021-02697	2021-07-12	Injury	STAAR SURGICAL COMPANY	2021-07-22	MTA	IMPLANTABLE COLLAMER LENS (ICL)	Inadequacy of Device Shape and/or Size	Cataract	NA	NA	1	Event Description: THE REPORTER INDICATED THAT THE SURGEON IMPLANTED A 13.2MM MICL13.2; -9.5 DIOPTER IMPLANTABLE COLLAMER LENS INTO THE PATIENT'S LEFT EYE (OS) ON (B)(6) 2019. ON (B)(6) 2021 THE LENS WAS EXPLANTED DUE TO THE PATIENT EXPERIENCED LOW VAULTING AND LENS OPACITY (ASC). THIS RESOLVED THE PROBLEM. THE CAUSE OF THE EVENT WAS REPORTED AS "OTHER" AND NOTED "LOW VAULT". Manufacturer Narrati…	Lens Extraction	Resolved
https://www.accessdata.fda.gov/scripts/cdrh/cfdocs/cfMAUDE/Detail.CFM?MDRFOI__ID=14283191&pc=MTA	2023826-2022-01401	2022-02-11	Injury	STAAR SURGICAL COMPANY	2022-05-04	MTA	IMPLANTABLE COLLAMER LENS (ICL)	Inadequacy of Device Shape and/or Size	Cataract	NA	NA	1	Event Description: THE REPORTER INDICATED THAT THE SURGEON IMPLANTED A 13.2MM VICM5_13.2; -5.00 DIOPTER IMPLANTABLE COLLAMER LENS INTO THE PATIENT'S LEFT EYE (OS) ON (B)(6) 2022. THE PATIENT EXPERIENCED LOW VAULTING AND LENS OPACITY (ASC). ON (B)(6) 2022 THE LENS WAS EXCHANGED WITH A LONGER LENGTH LENS BUT IT WAS NOTED "AFTER LENS REPLACEMENT; THERE IS A DECREASE IN VISUAL ACUITY; BUT THE PATIENT…	Lens Exchange	unknown
https://www.accessdata.fda.gov/scripts/cdrh/cfdocs/cfMAUDE/Detail.CFM?MDRFOI__ID=14189499&pc=MTA	2023826-2022-01284	2022-03-16	Injury	STAAR SURGICAL COMPANY	2022-04-22	MTA	IMPLANTABLE COLLAMER LENS (ICL)	Inadequacy of Device Shape and/or Size	Cataract	NA	NA	1	Event Description: THE REPORTER INDICATED THAT A 12.1MM, VICMO12.1 -7.0 DIOPTER, IMPLANTABLE COLLAMER LENS WAS IMPLANTED INTO THE PATIENTS RIGHT EYE (OD) ON (B)(6) 2020. LOW VAULT AND LENS OPACITY WAS OBSERVED. ON (B)(6) 2022 THE LENS WAS EXPLANTED AND IT WAS REPORTED THAT THE PROBLEM RESOLVED. CAUSE OF EVENT WAS UNKNOWN. THE REPORTER STATED THAT NO INTERVETNION WAS PERFORMED FOR THE LENS OPACITY…	Lens Extraction	Resolved
https://www.accessdata.fda.gov/scripts/cdrh/cfdocs/cfMAUDE/Detail.CFM?MDRFOI__ID=14189674&pc=MTA	2023826-2022-01285	2022-03-16	Injury	STAAR SURGICAL COMPANY	2022-04-22	MTA	IMPLANTABLE COLLAMER LENS (ICL)	Inadequacy of Device Shape and/or Size	Cataract	NA	NA	1	Event Description: THE REPORTER INDICATED THAT A 12.1MM, VICMO12.1 -6.5 DIOPTER, IMPLANTABLE COLLAMER LENS WAS IMPLANTED INTO THE PATIENTS LEFT EYE (OS) ON (B)(6) 2020. LOW VAULT AND LENS OPACITY WAS OBSERVED. ON (B)(6) 2022 THE LENS WAS EXPLANTED AND IT WAS REPORTED THAT THE PROBLEM RESOLVED. CAUSE OF EVENT WAS UNKNOWN. THE REPORTER STATED THAT NO INTERVENTION WAS PERFORMED FOR THE LENS OPACITY …	Lens Extraction	Resolved
https://www.accessdata.fda.gov/scripts/cdrh/cfdocs/cfMAUDE/Detail.CFM?MDRFOI__ID=16649701&pc=MTA	2023826-2023-01087	2023-02-28	Injury	STAAR SURGICAL COMPANY	2023-03-30	MTA	IMPLANTABLE COLLAMER LENS (ICL)	Inadequacy of Device Shape and/or Size	Cataract	P030016	NA	1	Event Description: THE REPORTER INDICATED THE SURGEON IMPLANTED A 13.2MM ICL IMPLANTABLE COLLAMER LENS, -12.50 DIOPTER, INTO THE PATIENTS RIGHT EYE (OD) ON (B)(6) 2023. ON (B)(6) 2023, A CENTRAL ANTERIOR SUBCAPSULAR OPACITY (CATARACT) WAS OBSERVED (VA WAS 20/25). THE ICL VAULT WAS HIGH (300%). THE LENS REMAINED IMPLANTED. Manufacturer Narrative: CLAIM # (B)(4). Manufacturer Narrative: CORRECTED D…	Lens Retention	unknown
https://www.accessdata.fda.gov/scripts/cdrh/cfdocs/cfMAUDE/Detail.CFM?MDRFOI__ID=14190574&pc=MTA	2023826-2022-01287	NA	Malfunction	STAAR SURGICAL COMPANY	2022-04-22 04:00:00	MTA	IMPLANTABLE COLLAMER LENS (ICL)	Inadequacy of Device Shape and/or Size	Cataract	NA	NA	1	Event Description: THE REPORTER INDICATED THAT A 12.1MM, MICL12.1, -9.00 DIOPTER, IMPLANTABLE COLLAMER LENS WAS IMPLANTED INTO THE PATIENTS RIGHT EYE (OD) ON (B)(6) 2021. LOW VAULT AND ANTERIOR CAPSULE CATARACT FORMATION WAS OBSERVED, LENS REMAINS IMPLANTED. IF ADDITIONAL INFORMATION IS RECEIVED A SUPPLEMENTAL MEDWATCH REPORT WILL BE SUBMITTED. Manufacturer Narrative: TYPE OF INVESTIGATION - LENS…	Lens Retention	unknown
https://www.accessdata.fda.gov/scripts/cdrh/cfdocs/cfMAUDE/Detail.CFM?MDRFOI__ID=14190575&pc=MTA	2023826-2022-01288	NA	Malfunction	STAAR SURGICAL COMPANY	2022-04-22 04:00:00	MTA	IMPLANTABLE COLLAMER LENS (ICL)	Inadequacy of Device Shape and/or Size	Cataract	NA	NA	1	Event Description: THE REPORTER INDICATED THAT A 12.1MM, MICL12.1, -9.50 DIOPTER, IMPLANTABLE COLLAMER LENS WAS IMPLANTED INTO THE PATIENTS LEFT EYE (OS) ON (B)(6) 2021. LOW VAULT AND ANTERIOR CAPSULE CATARACT FORMATION WAS OBSERVED, LENS REMAINS IMPLANTED. IF ADDITIONAL INFORMATION IS RECEIVED A SUPPLEMENTAL MEDWATCH REPORT WILL BE SUBMITTED Manufacturer Narrative: WEIGHT-RACE: UNK. DATE OF EVEN…	Lens Retention	unknown
https://www.accessdata.fda.gov/scripts/cdrh/cfdocs/cfMAUDE/Detail.CFM?MDRFOI__ID=14656722&pc=MTA	2023826-2022-01787	NA	Injury	STAAR SURGICAL COMPANY	2022-06-10 04:00:00	MTA	IMPLANTABLE COLLAMER LENS (ICL)	Inadequacy of Device Shape and/or Size	Cataract	P030016	NA	1	Event Description: THE REPORTER INDICATED THAT A 13.2MM VICM5_13.2 IMPLANTABLE COLLAMER LENS OF -11.00 DIOPTER WAS IMPLANTED INTO THE PATIENT'S LEFT EYE (OS) ON (B)(6) 2019. ON (B)(6) 2021 THE LENS WAS EXPLANTED DUE TO LOW VAULT AND LENS OPACITY. A REPLACEMENT LENS OF LONGER LENGTH WAS LATER IMPLANTED AND THE PROBLEM RESOLVED. CAUSE WAS REPORTED AS PATIENT-RELATED FACTOR. Manufacturer Narrative: …	Lens Exchange	Resolved
https://www.accessdata.fda.gov/scripts/cdrh/cfdocs/cfMAUDE/Detail.CFM?MDRFOI__ID=16584913&pc=MTA	2023826-2023-00976	NA	Injury	STAAR SURGICAL COMPANY	2023-03-21 04:00:00	MTA	IMPLANTABLE COLLAMER LENS (ICL)	Inadequacy of Device Shape and/or Size	Cataract	P030016	NA	1	Event Description: THE REPORTER INDICATED THAT A 13.2MM, VICM5_13.2 -11.50 DIOPTER, IMPLANTABLE COLLAMER LENS WAS IMPLANTED INTO THE PATIENTS RIGHT EYE (OD) ON (B)(6) 2022. THE PATIENT EXPERIENCED LOW VAULT AND IT WAS REPORTED THAT ON (B)(6) 2023 LENS OPACITY (ASC) WAS OBSERVED. LENS REMAINS IMPLANTED. "OTHER/ LOW VAULT" WAS REPORTED FOR CAUSE OF EVENT. ADDITIONAL INFORMATION HAS BEEN REQUESTED B…	Lens Retention	unknown
https://www.accessdata.fda.gov/scripts/cdrh/cfdocs/cfMAUDE/Detail.CFM?MDRFOI__ID=6539252&pc=MTA	2023826-2017-00718	NA	Injury	STAAR SURGICAL COMPANY	2017-05-02	MTA	IMPLANTABLE COLLAMER LENS (ICL)	Inadequacy of Device Shape and/or Size; Adverse Event Without Identified Device or Use Problem	Cataract	P030016	NA	1	Event Description: THE PATIENT REPORTED THE SURGEON IMPLANTED A 12.1MM MICL12.1 IMPLANTABLE COLLAMER LENS, -12.0 DIOPTER, IN HER LEFT EYE (OS). THE PATIENT REPORTED HAD LOST VISION DUE TO DEVELOPMENT OF A CATARACT. THE LENS WAS IMPLANTED ON (B)(6) 2012. THE FACILITY CONFIRMED THE PATIENT REPORT OF A CATARACT IN THE LEFT EYE AND WILL MONITOR THE PATIENT FOR ANY CHANGES. THE LENS REMAINS IMPLANTED.…	Lens Retention	unknown
https://www.accessdata.fda.gov/scripts/cdrh/cfdocs/cfMAUDE/Detail.CFM?MDRFOI__ID=4513713&pc=MTA	2023826-2015-00141	NA	Injury	STAAR SURGICAL COMPANY	2015-02-12	MTA	VISIAN ICL (IMPLANTABLE COLLAMER LENS)	Insufficient Information	Cataract	P030016	NA	1	Event Description: ADDITIONAL INFORMATION RECEIVED - THE SURGEON INDICATED THE CATARACT WAS RELATED TO THE DEVICE AND WAS EITHER A SURGICAL TRAUMA OR PROGRESSIVE CATARACT. THE PATIENT'S VISUAL ACUITY WAS 20/20._x000D_ Event Description: THE PATIENT REPORTED THE SURGEON IMPLANTED A 13.7MM MICL13.2 IMPLANTABLE COLLAMER LENS IN HIS LEFT EYE (OS). THE PATIENT REPORTED A CATARACT WAS FORMING ON UPPER …	Lens Retention	unknown
https://www.accessdata.fda.gov/scripts/cdrh/cfdocs/cfMAUDE/Detail.CFM?MDRFOI__ID=17262921&pc=MTA	2023826-2023-02665	2023-04-09	Injury	STAAR SURGICAL COMPANY	2023-07-05	MTA	IMPLANTABLE COLLAMER LENS (ICL)	Misfocusing	Cataract	P030016	NA	1	Event Description: THE REPORTER INDICATED THAT A 12.6MM VICMO12.6 IMPLANTABLE COLLAMER LENS OF A -10.0 DIOPTER WAS IMPLANTED INTO THE PATIENT'S LEFT EYE (OS) ON (B)(6) 2022. ON (B)(6) 2023, ASC LENS OPACITY WAS OBSERVED AND THE LENS WAS REMOVED. THE PROBLEM WAS RESOLVED. THE CAUSE OF THE EVENT IS UNKNOWN. Manufacturer Narrative: H6: WORK ORDER SEARCH: NO SIMILAR COMPLAINTS WITHIN ASSOCIATED LOTS …	Lens Extraction	Resolved
https://www.accessdata.fda.gov/scripts/cdrh/cfdocs/cfMAUDE/Detail.CFM?MDRFOI__ID=17283881&pc=MTA	2023826-2023-02672	2023-05-31	Injury	STAAR SURGICAL COMPANY	2023-07-07	MTA	IMPLANTABLE COLLAMER LENS (ICL)	Misfocusing	Cataract	P880091	NA	1	Event Description: THE REPORTER, INDICATED THAT A 12.0MM ICM120V4 IMPLANTABLE COLLAMER LENS OF -23.0 DIOPTER WAS IMPLANTED INTO THE PATIENT'S RIGHT EYE (OD) ON (B)(6) 2007. ON (B)(6) 2023, THE LENS WAS REMOVED, DUE TO SECONDARY CATARACT AND SIGNIFICANT VISIONS DECREASE. Manufacturer Narrative: A4-A6:UNK. H6: WORK ORDER SEARCH: NO SIMILAR COMPLAINTS WITHIN ASSOCIATED LOTS WERE FOUND. CLAIM# (B)(4).	Lens Extraction	unknown
https://www.accessdata.fda.gov/scripts/cdrh/cfdocs/cfMAUDE/Detail.CFM?MDRFOI__ID=10877667&pc=MTA	2023826-2020-02718	2020-01-21	Malfunction	STAAR SURGICAL COMPANY	2020-11-20	MTA	IMPLANTABLE COLLAMER LENS (ICL)	No Apparent Adverse Event	Cataract	NA	NA	1	Event Description: THE REPORTER INDICATED THAT A 12.6MM, VICMO12.6, -11.00 DIOPTER, IMPLANTABLE COLLAMER LENS WAS IMPLANTED INTO THE PATIENTS RIGHT EYE (OD) ON (B)(6) 2020 AND REMOVED WITHIN THE SAME SURGERY DUE TO LENS OPACITY (ASC). CATARACT SURGERY AND IOL IMPLANTATION WAS PERFORMED WITHIN THE SAME SURGERY AS REMOVAL OF INITIAL LENS. PROBLEM WAS RESOLVED. THE REPORTER STATED " WHEN THE ICL LEN…	Lens Extraction + Secondary Operation	unknown
https://www.accessdata.fda.gov/scripts/cdrh/cfdocs/cfMAUDE/Detail.CFM?MDRFOI__ID=10511797&pc=MTA	2023826-2020-01990	2020-03-06	Injury	STAAR SURGICAL COMPANY	2020-09-09	MTA	IMPLANTABLE COLLAMER LENS (ICL)	Off-Label Use; Adverse Event Without Identified Device or Use Problem	Cataract	NA#S-P#NA	NA	1	Event Description: THE REPORTER INDICATED THE SURGEON IMPLANTED A 12.6MM VICMO12.6 IMPLANTABLE COLLAMER LENS, -14.00 DIOPTER, IN THE PATIENT'S LEFT EYE (OS), ON (B)(6) 2017. THE LENS WAS EXPLANTED ON (B)(6) 2020 DUE TO AN ANTERIOR SUBCAPSULAR OPACITY WAS OBSERVED ON (B)(6) 2020. CATARACT SURGERY WAS NOT PERFORMED AND A DIFFERENT TYPE OF LENS WAS IMPLANTED. THE PROBLEM WAS RESOLVED. Manufacturer N…	Lens Exchange	Resolved
https://www.accessdata.fda.gov/scripts/cdrh/cfdocs/cfMAUDE/Detail.CFM?MDRFOI__ID=10511799&pc=MTA	2023826-2020-01989	2020-03-06	Injury	STAAR SURGICAL COMPANY	2020-09-09	MTA	IMPLANTABLE COLLAMER LENS (ICL)	Off-Label Use; Adverse Event Without Identified Device or Use Problem	Cataract	NA#S-P#NA	NA	1	Event Description: THE REPORTER INDICATED THE SURGEON IMPLANTED A 12.6MM VICMO12.6 IMPLANTABLE COLLAMER LENS, -13.50 DIOPTER, IN THE PATIENT'S RIGHT EYE (OD), ON (B)(6) 2017. THE LENS WAS EXPLANTED ON (B)(6) 2020 DUE TO AN ANTERIOR SUBCAPSULAR OPACITY WAS OBSERVED ON (B)(6) 2020. CATARACT SURGERY WAS NOT PERFORMED AND A DIFFERENT TYPE OF LENS WAS IMPLANTED. THE PROBLEM WAS RESOLVED. Manufacturer …	Lens Exchange	Resolved
https://www.accessdata.fda.gov/scripts/cdrh/cfdocs/cfMAUDE/Detail.CFM?MDRFOI__ID=17302644&pc=MTA	2023826-2023-02839	2023-01-10	Injury	STAAR SURGICAL COMPANY	2023-07-11	MTA	IMPLANTABLE COLLAMER LENS (ICL)	Off-Label Use; Adverse Event Without Identified Device or Use Problem	Cataract	P030016	NA	1	Event Description: THE REPORTER INDICATED THAT A 13.2MM, VICMO13.2 -13.50 DIOPTER, IMPLANTABLE COLLAMER LENS WAS IMPLANTED INTO THE PATIENTS RIGHT EYE (OD) ON (B)(6)2022. LENS OPACITY WAS OBSERVED ON (B)(6)2023. ON (B)(6)2023 THE LENS WAS EXPLANTED, IT WAS REPORTED THAT PHACO-EMULSIFICATION (CATARACT SURGERY) AND IOL IMPLANTATION WAS PERFORMED. PROBLEM RESOLVED. IN THE REPORTERS OPINION THE CAUSE…	Lens Extraction + Secondary Operation	Resolved
https://www.accessdata.fda.gov/scripts/cdrh/cfdocs/cfMAUDE/Detail.CFM?MDRFOI__ID=17302731&pc=MTA	2023826-2023-02840	2023-01-10	Injury	STAAR SURGICAL COMPANY	2023-07-11	MTA	IMPLANTABLE COLLAMER LENS (ICL)	Off-Label Use; Adverse Event Without Identified Device or Use Problem	Cataract	P030016	NA	1	Event Description: THE REPORTER INDICATED THAT A 13.2MM, VICMO13.2 -18.00 DIOPTER, IMPLANTABLE COLLAMER LENS WAS IMPLANTED INTO THE PATIENT'S LEFT EYE (OS) ON (B)(6) 2022. LENS OPACITY WAS OBSERVED ON (B)(6) 2023. ON (B)(6) 2023 THE LENS WAS EXPLANTED, IT WAS REPORTED THAT PHACO-EMULSIFICATION (CATARACT SURGERY) AND IOL IMPLANTATION WAS PERFORMED. PROBLEM RESOLVED. IN THE REPORTERS OPINION THE CA…	Lens Extraction + Secondary Operation	Resolved
https://www.accessdata.fda.gov/scripts/cdrh/cfdocs/cfMAUDE/Detail.CFM?MDRFOI__ID=16998309&pc=MTA	2023826-2023-01941	2023-01-26	Injury	STAAR SURGICAL COMPANY	2023-05-24	MTA	IMPLANTABLE COLLAMER LENS (ICL)	Off-Label Use; Adverse Event Without Identified Device or Use Problem	Cataract	P030016	NA	1	Event Description: THE REPORTER INDICATED THE SURGEON IMPLANTED A 12.6MM MICL12.6 IMPLANTABLE COLLAMER LENS, -09.50 DIOPTER, INTO THE PATIENTS RIGHT EYE (OD) ON (B)(6) 2018. A CATARACT WAS OBSERVED AND THE LENS REMAINED IMPLANTED. ADDITIONAL INFORMATION HAS BEEN REQUESTED BUT NONE HAS BEEN FORTHCOMING. Manufacturer Narrative: H6 - WORK ORDER SEARCH: NO SIMILAR COMPLAINT WAS REPORTED FOR UNITS WIT…	Lens Extraction + Secondary Operation	Resolved
https://www.accessdata.fda.gov/scripts/cdrh/cfdocs/cfMAUDE/Detail.CFM?MDRFOI__ID=16725719&pc=MTA	2023826-2023-01328	NA	Malfunction	STAAR SURGICAL COMPANY	2023-04-12 04:00:00	MTA	IMPLANTABLE COLLAMER LENS (ICL)	Off-Label Use; Adverse Event Without Identified Device or Use Problem	Cataract	P030016	NA	1	Event Description: THE REPORTER INDICATED THE SURGEON IMPLANTED A VISIAN ICL IMPLANTABLE COLLAMER LENS, INTO HER LEFT EYE (OS), IN 2011. THE REPORTER INDICATED A CATARACT HAD DEVELOPED AND THE LENS REMAINED IMPLANTED. ADDITIONAL INFORMATION HAS BEEN REQUESTED BUT NONE HAS BEEN FORTHCOMING. Manufacturer Narrative: PATIENT AGE/ DOB, WEIGHT, ETHNICITY & RACE UNKNOWN. EVENT DATE: UNKNOWN. DEVICE EXPI…	Lens Retention	unknown
https://www.accessdata.fda.gov/scripts/cdrh/cfdocs/cfMAUDE/Detail.CFM?MDRFOI__ID=16587376&pc=MTA	2023826-2023-00949	2023-02-14	Injury	STAAR SURGICAL COMPANY	2023-03-21	MTA	IMPLANTABLE COLLAMER LENS (ICL)	Off-Label Use; Inadequacy of Device Shape and/or Size	Cataract	UNK	NA	1	Event Description: THE REPORTER INDICATED THE SURGEON IMPLANTED A 11.5MM ICM115V4 IMPLANTABLE COLLAMER LENS, -12.00 DIOPTER, IN THE PATIENTS LEFT EYE (OS), ON (B)(6) 2013. THE LENS WAS REPORTED AS LOW VAULTING AND AN ANTERIOR SUBCAPSULAR OPACITY (CATARACT) WAS OBSERVED ON (B)(6) 2023. THE LENS REMAINED IMPLANTED. THE CAUSE OF THE EVENT WAS UNKNOWN. ADDITIONAL INFORMATION HAS BEEN REQUESTED BUT NO…	Lens Exchange	Resolved
https://www.accessdata.fda.gov/scripts/cdrh/cfdocs/cfMAUDE/Detail.CFM?MDRFOI__ID=16587382&pc=MTA	2023826-2023-00948	2023-02-14	Injury	STAAR SURGICAL COMPANY	2023-03-21	MTA	IMPLANTABLE COLLAMER LENS (ICL)	Off-Label Use; Inadequacy of Device Shape and/or Size	Cataract	UNK	NA	1	Event Description: THE REPORTER INDICATED THE SURGEON IMPLANTED A 11.5MM ICM115V4 IMPLANTABLE COLLAMER LENS, -13.50 DIOPTER, IN THE PATIENTS RIGHT EYE (OD), ON (B)(6) 2013. THE LENS WAS REPORTED AS LOW VAULTING AND AN ANTERIOR SUBCAPSULAR OPACITY (CATARACT) WAS OBSERVED ON (B)(6) 2023. THE LENS REMAINED IMPLANTED. THE CAUSE OF THE EVENT WAS UNKNOWN. ADDITIONAL INFORMATION HAS BEEN REQUESTED BUT N…	Lens Exchange	Resolved
https://www.accessdata.fda.gov/scripts/cdrh/cfdocs/cfMAUDE/Detail.CFM?MDRFOI__ID=16891772&pc=MTA	2023826-2023-01749	2023-04-13	Malfunction	STAAR SURGICAL COMPANY	2023-05-08	MTA	IMPLANTABLE COLLAMER LENS (ICL)	Off-Label Use; Inadequacy of Device Shape and/or Size	Cataract	P030016	NA	1	Event Description: THE REPORTER INDICATED THAT THE SURGEON IMPLANTED A 13.2MM MICL13.2; -5.50 DIOPTER IMPLANTABLE COLLAMER LENS INTO THE PATIENT'S LEFT EYE (OS) ON (B)(6) 2023. THE SURGEON REPORTS LOW VAULTING WITHOUT ROTATION AND LENS CATARACT (CORTICAL OBSERVED ON (B)(6) 2023). LENS REMAINS IMPLANTED. PROBLEM IS NOT RESOLVED. IT WAS ADDITIONALLY NOTED "GOOD. NO COMPLAINTS PER PATIENT". IF ADDIT…	Lens Retention	Not_Resolved
https://www.accessdata.fda.gov/scripts/cdrh/cfdocs/cfMAUDE/Detail.CFM?MDRFOI__ID=15891259&pc=MTA	2023826-2022-04271	NA	Injury	STAAR SURGICAL COMPANY	2022-11-30 05:00:00	MTA	IMPLANTABLE COLLAMER LENS (ICL)	Off-Label Use; Inadequacy of Device Shape and/or Size	Cataract	P030016	NA	1	Event Description: THE REPORTER INDICATED THAT A 12.1MM MICL 12.1 IMPLANTABLE COLLAMER LENS WAS IMPLANTED INTO THE PATIENTS RIGHT EYE (OD) ON (B)(6) 2020. NARROW VAULT AND PATIENT NEEDED CE (CATARACT EXTRACTION) OD DUE TO CONTACT WITH ICL. FORMING CATARACT. THE LENS REMAINS IMPLANTED. NO FURTHER INFORMATION HAS BEEN PROVIDED. ATTEMPTS TO OBTAIN ADDITIONAL INFORMATION HAVE NOT BEEN SUCCESSFUL. IF …	Lens Extraction + Secondary Operation	Resolved
https://www.accessdata.fda.gov/scripts/cdrh/cfdocs/cfMAUDE/Detail.CFM?MDRFOI__ID=10687738&pc=MTA	2023826-2020-02387	2020-07-31	Injury	STAAR SURGICAL COMPANY	2020-10-15	MTA	IMPLANTABLE COLLAMER LENS (ICL)	Off-Label Use; Inadequacy of Device Shape and/or Size; Improper or Incorrect Procedure or Method	Cataract	N/A	NA	1	Event Description: THE REPORTER INDICATED THE SURGEON IMPLANTED A 12.6MM VICMO12.6 IMPLANTABLE COLLAMER LENS, DIOPTER -9.5 INTO THE PATIENT'S RIGHT EYE (OD) ON (B)(6) 2020. INTRAOPERATIVELY THE LENS WAS EXPLANTED DUE TO LENS OPACITY ASC AND THE PROBLEM WAS RESOLVED. THE CAUSE OF THE EVENT IS REPORTED AS USER ERROR. REPORTEDLY, THE TIP OF THE KNIFE TOUCHED THE ANTERIOR LENS CAPSULE. Manufacturer N…	Lens Extraction + Secondary Operation	Resolved
https://www.accessdata.fda.gov/scripts/cdrh/cfdocs/cfMAUDE/Detail.CFM?MDRFOI__ID=5934940&pc=MTA	2023826-2016-01143	2016-06-17	Injury	STAAR SURGICAL COMPANY AG	2016-09-07	MTA	ICL (IMPLANTABLE COLLAMER LENS)	Appropriate Term/Code Not Available	Cataract, Induced; Blurred Vision; Loss of Vision; Halo; No Code Available	P030016	NA	1	Event Description: THE REPORTER INDICATED THE SURGEON IMPLANTED A 13.2MM MICL13.2 IMPLANTABLE COLLAMER LENS, -11.5 DIOPTER, IN THE PATIENT'S LEFT EYE (OS) ON (B)(6) 2012 WITH EXCELLENT RESULTS. THE PATIENT REPORTED DECREASED VISON, WITH GLARE, BLURRY VISION AND HALOS FOR 2 WEEKS. AN EXAM ON (B)(6) 2016 SHOWED AN ANTERIOR SUBCAPSULAR CATARACT . THE LENS REMAINS IMPLANTED. THE PATIENT'S POST-OP BES…	Lens Retention	unknown
https://www.accessdata.fda.gov/scripts/cdrh/cfdocs/cfMAUDE/Detail.CFM?MDRFOI__ID=5934943&pc=MTA	2023826-2016-01144	2016-06-17	Injury	STAAR SURGICAL COMPANY AG	2016-09-07	MTA	ICL (IMPLANTABLE COLLAMER LENS)	Appropriate Term/Code Not Available	Cataract, Induced; Blurred Vision; Loss of Vision; Halo; No Code Available	P030016	NA	1	Event Description: THE REPORTER INDICATED THE SURGEON IMPLANTED A 13.2MM MICL13.2 IMPLANTABLE COLLAMER LENS, -11.5 DIOPTER, IN THE PATIENT'S RIGHT EYE (OD) ON (B)(6) 2012 WITH EXCELLENT RESULTS. THE PATIENT REPORTED DECREASED VISON, WITH GLARE, BLURRY VISION AND HALOS FOR 2 WEEKS. AN EXAM ON (B)(6) 2016 SHOWED AN ANTERIOR SUBCAPSULAR CATARACT . THE LENS REMAINS IMPLANTED. THE PATIENT'S POST-OP BE…	Lens Retention	unknown
https://www.accessdata.fda.gov/scripts/cdrh/cfdocs/cfMAUDE/Detail.CFM?MDRFOI__ID=6645517&pc=MTA	2023826-2017-00956	2017-03-22	Injury	STAAR SURGICAL COMPANY AG	2017-06-15	MTA	IMPLANTABLE COLLAMER LENS (ICL)	Inadequacy of Device Shape and/or Size	Cataract, Induced; Blurred Vision; No Code Available	P030016	NA	1	Event Description: THE REPORTER INDICATED THE SURGEON IMPLANTED A 13.2MM MICL13.2 IMPLANTABLE COLLAMER LENS, -9.5 DIOPTER, IN THE PATIENT'S RIGHT EYE (OD) ON (B)(6) 2012. THE REPORTER INDICATED LENS OPACITY (ANTERIOR) WAS FIRST OBSERVED ON (B)(6) 2017 AND THE LENS WAS EXPLANTED DUE TO LOW VAULTING ON (B)(6) 2017. THE LENS WAS EXCHANGED FOR A LONGER LENS. THE PATIENT HAD ADDITIONAL SYMPTOMS - MILD…	Lens Exchange	Resolved
https://www.accessdata.fda.gov/scripts/cdrh/cfdocs/cfMAUDE/Detail.CFM?MDRFOI__ID=5652095&pc=MTA	2023826-2016-00641	2013-06-13	Injury	STAAR SURGICAL COMPANY	2016-05-12	MTA	ICL (IMPLANTABLE COLLAMER LENS)	Inadequacy of Device Shape and/or Size; Appropriate Term/Code Not Available	Cataract, Induced; Blurred Vision; No Code Available	P030016	NA	1	Event Description: THE REPORTER STATED THE SURGEON IMPLANTED A 13.2MM MICL13.2 IMPLANTABLE COLLAMER LENS, -7.5 DIOPTER, IN THE PATIENT'S LEFT EYE (OS) ON (B)(6) 2013. THE LENS WAS EXPLANTED ON (B)(6) 2016 DUE TO LOW/NO VAULT. THE LENS WAS EXCHANGED FOR A LONGER LENS. ADDITIONAL INFORMATION HAS BEEN REQUESTED BUT NONE HAS BEEN FORTHCOMING. IF ADDITIONAL INFORMATION IS RECEIVED, A SUPPLEMENTAL MEDW…	Lens Exchange	Resolved
https://www.accessdata.fda.gov/scripts/cdrh/cfdocs/cfMAUDE/Detail.CFM?MDRFOI__ID=6054105&pc=MTA	2023826-2016-01523	2016-10-10	Injury	STAAR SURGICAL COMPANY	2016-10-25	MTA	ICL (IMPLANTABLE COLLAMER LENS)	Inadequacy of Device Shape and/or Size	Cataract, Induced; Corneal Edema; Hyphema; Intraocular Pressure Increased; No Code Available	P030016	NA	1	Event Description: THE REPORTER STATED THAT THE SURGEON IMPLANTED A 12.1MM MICL12.1 LENS, -3.50 DIOPTER, IN THE PATIENT'S RIGHT EYE ON (B)(6) 2016. THE LENS WAS EXPLANTED ON THE SAME DAY DUE TO EXCESSIVE VAULTING, RESULTING IN ELEVATED INTRAOCULAR PRESSURE (IOP), SHALLOW ANTERIOR CHAMBER, CORNEAL EDEMA, HYPHEMA, AND DEVELOPMENT OF A CATARACT._x000D_ Manufacturer Narrative: DEVICE EVALUATION: PROD…	Lens Extraction	unknown
https://www.accessdata.fda.gov/scripts/cdrh/cfdocs/cfMAUDE/Detail.CFM?MDRFOI__ID=5218705&pc=MTA	2023826-2015-01478	2015-08-10	Injury	STAAR SURGICAL COMPANY	2015-11-11	MTA	ICL (IMPLANTABLE COLLAMER LENS)	Device Operates Differently Than Expected; Appropriate Term/Code Not Available	Cataract, Induced; Intraocular Pressure Increased; Pupillary Block; No Code Available	NA	NA	1	Event Description: THE REPORTER INDICATED THE SURGEON IMPLANTED A 12.6MM VICMO12.6 IMPLANTABLE COLLAMER LENS, -07.50 DIOPTER, IN THE PATIENT'S LEFT EYE (OS) ON (B)(6) 2015. THE LENS WAS EXPLANTED ON (B)(6) 2015 DUE TO THE DEVELOPMENT OF AN ANTERIOR SUBCAPSULAR OPACITY, PUPIL BLOCK, ELEVATED INTRAOCULAR PRESSURE AND ANGLE CLOSURE. THE LENS WAS NOT EXCHANGED FOR ANOTHER LENS. Manufacturer Narrative…	Lens Extraction	unknown
https://www.accessdata.fda.gov/scripts/cdrh/cfdocs/cfMAUDE/Detail.CFM?MDRFOI__ID=5328083&pc=MTA	2023826-2015-01750	NA	Injury	STAAR SURGICAL COMPANY	2015-12-24	MTA	ICL (IMPLANTABLE COLLAMER LENS)	Appropriate Term/Code Not Available	Cataract, Induced; Loss of Vision	P030016	NA	1	Event Description: THE PATIENT REPORTED THE SURGEON IMPLANTED A 12.6MM MICL12.6 IMPLANTABLE COLLAMER LENS, -8.5 DIOPTER, IN HIS LEFT EYE (OS). THE PATIENT REPORTED HIS VISION HAS CHANGED TO -0.5. THE FACILITY REPORTED THE PATIENT HAS AN EARLY CATARACT, DUE TO THE AGING PROCESS AND NOT RELATED TO THE DEVICE. THE LENS REMAINS IMPLANTED. THE PATIENT'S POST-OP VA WAS 20/25. Manufacturer Narrative: ME…	Lens Retention	unknown
https://www.accessdata.fda.gov/scripts/cdrh/cfdocs/cfMAUDE/Detail.CFM?MDRFOI__ID=4760961&pc=MTA	2023826-2015-00534	2014-02-18	Injury	STAAR SURGICAL COMPANY AG	2015-05-08	MTA	VISIAN ICL (IMPLANTABLE COLLAMER LENS)	Device remains implanted	Cataract, Induced; Loss of Vision	P030016	NA	1	Event Description: IT WAS REPORTED PATIENT HAD A MICL 13.6 MM IMPLANTABLE COLLAMER LENS IMPLANTED IN THE PATIENT'S LEFT EYE ON (B)(6) 2012. AS PART OF THE POST MARKET STUDY, THE PATIENT REPORTED EXPERIENCING HAVING LOST ACUITY IN HIS NEAR VISION AFTER THE SURGERY AND HAVE DIFFICULTY FOCUSING WITHOUT THE USE OF CONTACTS OR GLASSES TO BALANCE HIS EYESIGHT. ALSO BEING TOLD BY HIS OPTOMETRIST THAT SH…	Lens Retention	unknown
https://www.accessdata.fda.gov/scripts/cdrh/cfdocs/cfMAUDE/Detail.CFM?MDRFOI__ID=5536601&pc=MTA	2023826-2016-00303	NA	Injury	STAAR SURGICAL COMPANY	2016-03-30	MTA	ICL (IMPLANTABLE COLLAMER LENS)	Inadequacy of Device Shape and/or Size; Appropriate Term/Code Not Available	Cataract, Induced; Loss of Vision	P030016	NA	1	Event Description: THE PATIENT REPORTED THE SURGEON IMPLANTED A 13.2MM MICL13.2 IMPLANTABLE COLLAMER LENS, -11.5 DIOPTER, IN HER RIGHT EYE (OD) ON (B)(6) 2011. THE PATIENT REPORTED LOST VISION DUE TO THE DEVELOPMENT OF A CATARACT. THE LENS REMAINS IMPLANTED. ADDITIONAL INFORMATION HAS BEEN REQUESTED BUT NONE HAS BEEN FORTHCOMING. IF ADDITIONAL INFORMATION IS RECEIVED, A SUPPLEMENTAL MEDWATCH REPO…	Lens Retention	unknown
https://www.accessdata.fda.gov/scripts/cdrh/cfdocs/cfMAUDE/Detail.CFM?MDRFOI__ID=5328002&pc=MTA	2023826-2015-01751	2014-04-14	Injury	STAAR SURGICAL COMPANY	2015-12-24	MTA	ICL (IMPLANTABLE COLLAMER LENS)	Appropriate Term/Code Not Available	Cataract, Induced; Loss of Vision; No Code Available	P030016	NA	1	Event Description: THE PATIENT REPORTED THE SURGEON IMPLANTED A 12.1MM MICL12.1 IMPLANTABLE COLLAMER LENS, -13.5 DIOPTER, IN HER RIGHT EYE (OD). THE PATIENT REPORTED SHE HAD LOST VISION DUE TO THE DEVELOPMENT OF A CATARACT (ANTERIOR AND POST SUBCAPSULAR). THE LENS WAS EXPLANTED ON (B)(6) 2014, CATARACT SURGERY WAS PERFORMED AND AN IOL WAS IMPLANTED. THE PATIENT'S VA WAS 20/25 AND THE PROGNOSIS IS…	Lens Extraction + Secondary Operation	Resolved
https://www.accessdata.fda.gov/scripts/cdrh/cfdocs/cfMAUDE/Detail.CFM?MDRFOI__ID=5084245&pc=MTA	2023826-2015-01194	2015-06-16	Injury	STAAR SURGICAL COMPANY	2015-09-17	MTA	ICL (IMPLANTABLE COLLAMER LENS)	Appropriate Term/Code Not Available	Cataract, Induced; Loss of Vision; No Code Available	NA	NA	1	Event Description: THE REPORTER INDICATED THE SURGEON IMPLANTED A 13.2MM VICMO13.2 IMPLANTABLE COLLAMER LENS, -09.00 DIOPTER, IN THE PATIENT'S RIGHT EYE (OD) ON (B)(6) 2015. THE LENS WAS EXPLANTED ON (B)(6) 2015 DUE TO LOSS OF BEST-CORRECTED VISUAL ACUITY AND LENS OPACITY (ANTERIOR SUBCAPSULAR). THE LENS WAS NOT EXCHANGED FOR ANOTHER LENS. THERE IS STILL SEDIMENT (VISCOELASTIC) ON THE CRYSTALLINE…	Lens Extraction	Not_Resolved
https://www.accessdata.fda.gov/scripts/cdrh/cfdocs/cfMAUDE/Detail.CFM?MDRFOI__ID=5536606&pc=MTA	2023826-2016-00302	NA	Injury	STAAR SURGICAL COMPANY	2016-03-30	MTA	ICL (IMPLANTABLE COLLAMER LENS)	Appropriate Term/Code Not Available	Cataract, Induced; Loss of Vision; No Code Available	P030016	NA	1	Event Description: THE PATIENT REPORTED THE SURGEON IMPLANTED A 12.6MM MICL12.6 IMPLANTABLE COLLAMER LENS, -11.0 DIOPTER, IN HER LEFT EYE (OS) ON (B)(6) 2013. THE PATIENT REPORTED LOST VISION DUE TO THE DEVELOPMENT OF A CATARACT. THE PATIENT REPORTED THE EYE IS CLOUDY. THE LENS REMAINS IMPLANTED. ADDITIONAL INFORMATION HAS BEEN REQUESTED BUT NONE HAS BEEN FORTHCOMING. IF ADDITIONAL INFORMATION IS…	Lens Extraction + Secondary Operation	Resolved
https://www.accessdata.fda.gov/scripts/cdrh/cfdocs/cfMAUDE/Detail.CFM?MDRFOI__ID=5536972&pc=MTA	2023826-2016-00300	NA	Injury	STAAR SURGICAL COMPANY	2016-03-30	MTA	ICL (IMPLANTABLE COLLAMER LENS)	Appropriate Term/Code Not Available	Cataract, Induced; Loss of Vision; No Code Available	P030016	NA	1	Event Description: THE PATIENT REPORTED THE SURGEON IMPLANTED A 13.2MM MICL13.2 IMPLANTABLE COLLAMER LENS, -10.5 DIOPTER, IN HER LEFT EYE (OS) ON (B)(6) 2011. THE PATIENT REPORTED LOST VISION DUE TO THE DEVELOPMENT OF A CATARACT AND THE LENS WAS REMOVED. CATARACT SURGERY WAS PERFORMED. ADDITIONAL INFORMATION HAS BEEN REQUESTED BUT NONE HAS BEEN FORTHCOMING. IF ADDITIONAL INFORMATION IS RECEIVED, …	Lens Extraction + Secondary Operation	Resolved
https://www.accessdata.fda.gov/scripts/cdrh/cfdocs/cfMAUDE/Detail.CFM?MDRFOI__ID=5327964&pc=MTA	2023826-2015-01752	2014-07-21	Injury	STAAR SURGICAL COMPANY	2015-12-24	MTA	ICL (IMPLANTABLE COLLAMER LENS)	Inadequacy of Device Shape and/or Size; Appropriate Term/Code Not Available	Cataract, Induced; Loss of Vision; No Code Available	P030016	NA	1	Event Description: THE PATIENT REPORTED THE SURGEON IMPLANTED A 13.2MM MICL13.2 IMPLANTABLE COLLAMER LENS, -8.0 DIOPTER, IN HER LEFT EYE (OS). THE PATIENT REPORTED SHE HAD LOST VISION DUE TO THE DEVELOPMENT OF A CATARACT (ANTERIOR SUBCAPSULAR). THE LENS HAD A LOW VAULT. THE LENS WAS EXPLANTED ON (B)(6) 2015, THE CATARACT WAS REMOVED AND AN IOL WAS IMPLANTED. THE PATIENT'S POST-OP VA WAS 20/20. Ma…	Lens Extraction + Secondary Operation	Resolved
https://www.accessdata.fda.gov/scripts/cdrh/cfdocs/cfMAUDE/Detail.CFM?MDRFOI__ID=5139024&pc=MTA	2023826-2015-01342	NA	Injury	STAAR SURGICAL COMPANY AG	2015-10-08	MTA	ICL (IMPLANTABLE COLLAMER LENS)	Inadequacy of Device Shape and/or Size; Appropriate Term/Code Not Available	Cataract, Induced; Loss of Vision; No Code Available	P030016	NA	1	Event Description: THE REPORTER INDICATED THE SURGEON IMPLANTED A 12.6MM MICL12.6 IMPLANTABLE COLLAMER LENS, -11.0 DIOPTER, IN THE PATIENT'S RIGHT EYE (OD) ON (B)(6) 2013. THE LENS WAS EXPLANTED ON (B)(6) 2015 DUE TO A LOW VAULT, THE DEVELOPMENT OF A CATARACT AND DECREASED VISUAL ACUITY. ADDITIONAL INFORMATION HAS BEEN REQUESTED BUT NONE HAS BEEN FORTHCOMING. IF ADDITIONAL INFORMATION IS RECEIVED…	Lens Retention	unknown
https://www.accessdata.fda.gov/scripts/cdrh/cfdocs/cfMAUDE/Detail.CFM?MDRFOI__ID=6284955&pc=MTA	2023826-2017-00114	2015-04-13	Injury	STAAR SURGICAL COMPANY	2017-01-27	MTA	ICL (IMPLANTABLE COLLAMER LENS)	Inadequacy of Device Shape and/or Size; Device Operates Differently Than Expected	Cataract, Induced; Loss of Vision; No Code Available	P030016	NA	1	Event Description: THE PATIENT REPORTED THE SURGEON IMPLANTED A 12.6MM MICL12.6 IMPLANTABLE COLLAMER LENS, -9.5 DIOPTER, IN HIS RIGHT EYE (OD). THE PATIENT REPORTED HAD LOST VISION DUE TO THE DEVELOPMENT OF A CATARACT. THE FACILITY REPORTED THE CATARACT (ANTERIOR SUBCAPSULAR) WAS DIAGNOSED ON (B)(6) 2015. THE FACILITY REPORTED THE LENS WAS EXPLANTED ON (B)(6) 2016, CATARACT SURGERY WAS PERFORMED …	Lens Extraction + Secondary Operation	Resolved
https://www.accessdata.fda.gov/scripts/cdrh/cfdocs/cfMAUDE/Detail.CFM?MDRFOI__ID=6284956&pc=MTA	2023826-2017-00115	2015-04-13	Injury	STAAR SURGICAL COMPANY	2017-01-27	MTA	ICL (IMPLANTABLE COLLAMER LENS)	Inadequacy of Device Shape and/or Size; Device Operates Differently Than Expected	Cataract, Induced; Loss of Vision; No Code Available	P030016	NA	1	Event Description: THE PATIENT REPORTED THE SURGEON IMPLANTED A 12.6MM MICL12.6 IMPLANTABLE COLLAMER LENS, -9.5 DIOPTER, IN HIS LEFT EYE (OS). THE PATIENT REPORTED HAD LOST VISION DUE TO THE DEVELOPMENT OF A CATARACT. THE FACILITY REPORTED THE CATARACT (ANTERIOR SUBCAPSULAR) WAS DIAGNOSED ON (B)(6) 2015. THE FACILITY REPORTED THE LENS WAS EXPLANTED ON (B)(6) 2016, CATARACT SURGERY WAS PERFORMED A…	Lens Extraction + Secondary Operation	Resolved
https://www.accessdata.fda.gov/scripts/cdrh/cfdocs/cfMAUDE/Detail.CFM?MDRFOI__ID=5047775&pc=MTA	2023826-2015-01116	2015-02-13	Injury	STAAR SURGICAL COMPANY	2015-09-01	MTA	ICL (IMPLANTABLE COLLAMER LENS)	Appropriate Term/Code Not Available	Cataract, Induced; No Code Available	NA	NA	1	Event Description: THE REPORTER INDICATED THE SURGEON IMPLANTED A 12.1MM VICMO12.1 IMPLANTABLE COLLAMER LENS, -12.00 DIOPTER, IN THE PATIENT'S LEFT EYE (OS) ON (B)(6) 2015. THE LENS WAS EXPLANTED ON (B)(6) 2015 DUE TO LENS OPACITY (CORTICAL) AND A CAPSULAR TEAR. CATARACT SURGERY WAS PERFORMED AND AN IOL WAS IMPLANTED. THE PATIENT'S POST-OP BEST-CORRECTED VISUAL ACUITY WAS 20/20. Manufacturer Narr…	Lens Extraction + Secondary Operation	unknown
https://www.accessdata.fda.gov/scripts/cdrh/cfdocs/cfMAUDE/Detail.CFM?MDRFOI__ID=5293145&pc=MTA	2023826-2015-01653	2015-08-18	Injury	STAAR SURGICAL COMPANY	2015-12-14	MTA	ICL (IMPLANTABLE COLLAMER LENS)	Appropriate Term/Code Not Available	Cataract, Induced; No Code Available	P030016	NA	1	Event Description: THE REPORTER INDICATED THE SURGEON IMPLANTED A 11.5MM ICM115V4 -22.00 DIOPTER IMPLANTABLE COLLAMER LENS IN THE PATIENT'S RIGHT EYE ON (B)(6) 2008. A ANTERIOR SUBCAPSULAR CATARACT WAS OBSERVED ON (B)(6) 2015. THE LENS WAS EXPLANTED, CATARACT SURGERY AND A IOL WAS IMPLANTATION WAS PERFORMED ON (B)(6) 2015. PATIENT'S LAST VISIT ON (B)(6) 2015, BCVA WAS 20/40. Manufacturer Narrativ…	Lens Extraction + Secondary Operation	Resolved
https://www.accessdata.fda.gov/scripts/cdrh/cfdocs/cfMAUDE/Detail.CFM?MDRFOI__ID=5826213&pc=MTA	2023826-2016-00983	2016-06-08	Injury	STAAR SURGICAL COMPANY	2016-07-27	MTA	ICL (IMPLANTABLE COLLAMER LENS)	Appropriate Term/Code Not Available	Cataract, Induced; No Code Available	P030016	NA	1	Event Description: THE REPORTER STATED THE SURGEON IMPLANTED A 12.6MM MICL12.6 IMPLANTABLE COLLAMER LENS, -12.0 DIOPTER, IN THE PATIENT'S LEFT EYE (OS) ON (B)(6) 2016. THE LENS WAS EXPLANTED DUE TO DEVELOPMENT OF A CATARACT. THE PATIENT'S NATURAL LENS WAS ALSO REMOVED AND REPLACED WITH A DIFFERENT INTRAOCULAR LENS (IOL). ADDITIONAL INFORMATION HAS BEEN REQUESTED BUT NONE HAS BEEN FORTHCOMING. IF …	Lens Extraction + Secondary Operation	unknown
https://www.accessdata.fda.gov/scripts/cdrh/cfdocs/cfMAUDE/Detail.CFM?MDRFOI__ID=5680358&pc=MTA	2023826-2016-00764	NA	Injury	STAAR SURGICAL COMPANY AG	2016-05-25	MTA	ICL (IMPLANTABLE COLLAMER LENS)	Appropriate Term/Code Not Available	Cataract, Induced; No Code Available	P030016	NA	1	Event Description: THE REPORTER STATED THE SURGEON IMPLANTED A 12.1MM MICL12.1 IMPLANTABLE COLLAMER LENS, -9.5 DIOPTER, IN THE PATIENT'S LEFT EYE (OS) ON (B)(6) 2009. THE LENS WAS EXPLANTED ON (B)(6) 2016 DUE TO THE DEVELOPMENT OF A CATARACT. CATARACT SURGERY WAS PERFORMED AND AN INTRAOCULAR LENS WAS IMPLANTED. THE REPORTER STATED THE PATIENT IS DOING WELL AND THE LENS WAS DISCARDED. Manufacturer…	Lens Extraction + Secondary Operation	Resolved
https://www.accessdata.fda.gov/scripts/cdrh/cfdocs/cfMAUDE/Detail.CFM?MDRFOI__ID=5680364&pc=MTA	2023826-2016-00765	NA	Injury	STAAR SURGICAL COMPANY AG	2016-05-25	MTA	ICL (IMPLANTABLE COLLAMER LENS)	Appropriate Term/Code Not Available	Cataract, Induced; No Code Available	P030016	NA	1	Event Description: THE REPORTER STATED THE SURGEON IMPLANTED A 12.1MM MICL12.1 IMPLANTABLE COLLAMER LENS, -9.5 DIOPTER, IN THE PATIENT'S RIGHT EYE (OD) ON (B)(6) 2009. THE LENS WAS EXPLANTED ON (B)(6) 2016 DUE TO THE DEVELOPMENT OF A CATARACT. CATARACT SURGERY WAS PERFORMED AND AN INTRAOCULAR LENS WAS IMPLANTED. THE REPORTER STATED THE PATIENT IS DOING WELL AND THE LENS WAS DISCARDED. Manufacture…	Lens Extraction + Secondary Operation	Resolved
https://www.accessdata.fda.gov/scripts/cdrh/cfdocs/cfMAUDE/Detail.CFM?MDRFOI__ID=5533731&pc=MTA	2023826-2016-00354	2014-01-20	Injury	STAAR SURGICAL COMPANY AG	2016-03-29	MTA	ICL (IMPLANTABLE COLLAMER LENS)	Device Operates Differently Than Expected; Appropriate Term/Code Not Available	Cataract, Induced; No Code Available	P030016	NA	1	Event Description: THE REPORTER INDICATED THE SURGEON IMPLANTED A 12.0MM ICM120V4 IMPLANTABLE COLLAMER LENS, -06.5 DIOPTER, IN THE PATIENT'S LEFT EYE (OS) ON (B)(6) 2011. THE LENS WAS EXPLANTED ON (B)(6) 2015 DUE TO LENS OPACITY (ANTERIOR SUBCAPSULAR), NOTED ON (B)(6) 2014. THE SURGEON PERFORMED CATARACT SURGERY AND AN IOL WAS IMPLANTED. THE PATIENT'S POST-OP BEST-CORRECTED VISUAL ACUITY WAS 20/2…	Lens Extraction + Secondary Operation	Resolved
https://www.accessdata.fda.gov/scripts/cdrh/cfdocs/cfMAUDE/Detail.CFM?MDRFOI__ID=5293227&pc=MTA	2023826-2015-01652	2015-05-22	Injury	STAAR SURGICAL COMPANY	2015-12-14	MTA	ICL (IMPLANTABLE COLLAMER LENS)	Device Operates Differently Than Expected; Appropriate Term/Code Not Available	Cataract, Induced; No Code Available	P030016	NA	1	Event Description: THE REPORTER INDICATED THE SURGEON IMPLANTED A 11.5MM ICM115V4 -17.50 DIOPTER IMPLANTABLE COLLAMER LENS IN THE PATIENT'S LEFT EYE (OS) ON (B)(6) 2006. A ANTERIOR SUBCAPSULAR CATARACT WAS OBSERVED ON (B)(6) 2015.THE LENS WAS EXPLANTED, CATARACT SURGERY AND A IOL WAS IMPLANTATION WAS PERFORMED ON (B)(6) 2015 . PATIENT'S LAST VISIT ON (B)(6) 2015, BCVA WAS 20/20._x000D_ Manufactur…	Lens Extraction + Secondary Operation	unknown
https://www.accessdata.fda.gov/scripts/cdrh/cfdocs/cfMAUDE/Detail.CFM?MDRFOI__ID=5553204&pc=MTA	2023826-2016-00408	2015-11-14	Injury	STAAR SURGICAL COMPANY AG	2016-04-06	MTA	ICL (IMPLANTABLE COLLAMER LENS)	Device Operates Differently Than Expected; Appropriate Term/Code Not Available	Cataract, Induced; No Code Available	P030016	NA	1	Event Description: THE REPORTER INDICATED THE SURGEON IMPLANTED A 12.5MM ICM125V4 IMPLANTABLE COLLAMER LENS, -09.0 DIOPTER, IN THE PATIENT'S LEFT EYE (OS) ON (B)(6) 2009. THE LENS WAS EXPLANTED ON (B)(6) 2015 DUE TO LENS OPACITY (ANTERIOR SUBCAPSULAR). THE LENS WAS EXCHANGED FOR A LONGER LENS AND THE PROBLEM WAS RESOLVED. Manufacturer Narrative: THE LENS WAS RETURNED DRY IN CASE/VIAL; VISUAL INSP…	Lens Exchange	Resolved
https://www.accessdata.fda.gov/scripts/cdrh/cfdocs/cfMAUDE/Detail.CFM?MDRFOI__ID=5873542&pc=MTA	2023826-2016-01065	2016-06-16	Injury	STAAR SURGICAL COMPANY	2016-08-12	MTA	ICL (IMPLANTABLE COLLAMER LENS)	Device Operates Differently Than Expected; Appropriate Term/Code Not Available	Cataract, Induced; No Code Available	N/A	NA	1	Event Description: THE REPORTER INDICATED THAT THE SURGEON IMPLANTED A 12.6MM VICMO12.6 IMPLANTABLE COLLAMER LENS, -16.0 DIOPTER IN TO THE PATIENT'S RIGHT EYE (OD) ON (B)(6) 2016. THE LENS WAS EXPLANTED ON (B)(6) 2016 DUE TO THE DEVELOPMENT OF A CATARACT AND REFRACTIVE SURPRISE. THE LENS WAS REMOVED, CATARACT SURGERY WAS PERFORMED AND A TORIC IOL WAS IMPLANTED WITH GOOD RESULTS._x000D_ Manufactur…	Lens Extraction + Secondary Operation	Resolved
https://www.accessdata.fda.gov/scripts/cdrh/cfdocs/cfMAUDE/Detail.CFM?MDRFOI__ID=5533727&pc=MTA	2023826-2016-00353	2012-05-18	Injury	STAAR SURGICAL COMPANY AG	2016-03-29	MTA	ICL (IMPLANTABLE COLLAMER LENS)	Inadequacy of Device Shape and/or Size; Appropriate Term/Code Not Available	Cataract, Induced; No Code Available	P030016	NA	1	Event Description: THE REPORTER INDICATED THE SURGEON IMPLANTED A 12.0MM ICM120V4 IMPLANTABLE COLLAMER LENS, -16.0 DIOPTER, IN THE PATIENT'S RIGHT EYE (OD) ON (B)(6) 2012. THE LENS WAS EXPLANTED ON (B)(6) 2015 DUE TO LOW VAULTING AND LENS OPACITY (ANTERIOR SUBCAPSULAR), NOTED ON (B)(6) 2015. THE SURGEON PERFORMED CATARACT SURGERY AND AN IOL WAS IMPLANTED. THE PATIENT'S POST-OP BEST-CORRECTED VISU…	Lens Extraction + Secondary Operation	Resolved
https://www.accessdata.fda.gov/scripts/cdrh/cfdocs/cfMAUDE/Detail.CFM?MDRFOI__ID=5084270&pc=MTA	2023826-2015-01197	2015-05-15	Injury	STAAR SURGICAL COMPANY	2015-09-17	MTA	ICL (IMPLANTABLE COLLAMER LENS)	Inadequacy of Device Shape and/or Size; Appropriate Term/Code Not Available	Cataract, Induced; No Code Available	P030016	NA	1	Event Description: THE REPORTER INDICATED THE SURGEON IMPLANTED A 11.5MM ICM115V4 IMPLANTABLE COLLAMER LENS, -20.0 DIOPTER, IN THE PATIENT'S LEFT EYE (OS) ON (B)(6) 2014. THE LENS WAS EXPLANTED ON (B)(6) 2015 DUE TO LOW VAULTING AND LENS OPACITY (ANTERIOR SUBCAPSULAR). Manufacturer Narrative: DEVICE EVALUATED BY MANUFACTURER? NO: LENS NOT RETURNED. (B)(4). METHOD (PROCESS EVALUATION): WORK ORDER …	Lens Extraction	unknown
https://www.accessdata.fda.gov/scripts/cdrh/cfdocs/cfMAUDE/Detail.CFM?MDRFOI__ID=5975337&pc=MTA	2023826-2016-01317	2016-08-19	Injury	STAAR SURGICAL COMPANY	2016-09-23	MTA	ICL (IMPLANTABLE COLLAMER LENS)	Inadequacy of Device Shape and/or Size; Appropriate Term/Code Not Available	Cataract, Induced; No Code Available	NA	NA	1	Event Description: THE REPORTER INDICATED THE SURGEON IMPLANTED A 13.2MM VICMO13.2 IMPLANTABLE COLLAMER LENS, -11.0 DIOPTER, IN THE PATIENT'S RIGHT EYE (OD) ON (B)(6) 2016. THE LENS WAS EXPLANTED ON (B)(6) 2016 DUE TO LOW VAULTING AND LENS OPACITY (ANTERIOR SUBCAPSULAR)._x000D_ Manufacturer Narrative: LENS REPOSITIONING WAS PERFORMED. DEVICE EVALUATION: PRODUCT EVALUATION FOUND THAT THE LENS WAS …	Lens Extraction	unknown
https://www.accessdata.fda.gov/scripts/cdrh/cfdocs/cfMAUDE/Detail.CFM?MDRFOI__ID=7427120&pc=MTA	2023826-2018-00550	NA	Injury	STAAR SURGICAL COMPANY	2018-04-12	MTA	IMPLANTABLE COLLAMER LENS (ICL)	Device Operates Differently Than Expected	Cataract, Induced; No Known Impact Or Consequence To Patient	P030016	NA	1	Event Description: THE REPORTER INDICATED THAT THE SURGEON IMPLANTED A 12.1 MM MICL12.1, -16.0 DIOPTER, IMPLANTABLE COLLAMER LENS INTO THE PATIENT'S EYE ON (B)(6) 2017. THE REPORTER STATED THAT THE SURGEON WILL BE REMOVING THE LENS BECAUSE IT IS TOO FLAT AND IT IS CAUSING A CATARACT. A LONGER LENS IN THE SAME POWER WAS ORDERED TO REPLACE THE LENS. ADDITIONAL INFORMATION HAS BEEN REQUESTED BUT NON…	unknown	unknown
https://www.accessdata.fda.gov/scripts/cdrh/cfdocs/cfMAUDE/Detail.CFM?MDRFOI__ID=5327956&pc=MTA	2023826-2015-01753	2014-07-21	Injury	STAAR SURGICAL COMPANY	2015-12-24	MTA	ICL (IMPLANTABLE COLLAMER LENS)	Inadequacy of Device Shape and/or Size; Appropriate Term/Code Not Available	Cataract, Induced; Retinal Tear; Loss of Vision	P030016	NA	1	Event Description: THE PATIENT REPORTED THE SURGEON IMPLANTED A 13.2MM MICL13.2 IMPLANTABLE COLLAMER LENS, -8.5 DIOPTER, IN HER RIGHT EYE (OD). THE PATIENT REPORTED SHE HAD LOST VISION DUE TO THE DEVELOPMENT OF A CATARACT (ANTERIOR SUBCAPSULAR). THE LENS HAD A LOW VAULT. THE PATIENT HAD A SMALL RETINAL TEAR AND IT WAS REPAIRED. THE LENS REMAINS IMPLANTED. THE PATIENT'S POST-OP VA WAS 20/20. Manuf…	Lens Retention	unknown
https://www.accessdata.fda.gov/scripts/cdrh/cfdocs/cfMAUDE/Detail.CFM?MDRFOI__ID=12449121&pc=MTA	2023826-2021-03482	NA	Injury	STAAR SURGICAL COMPANY	2021-09-09	MTA	IMPLANTABLE COLLAMER LENS (ICL)	Adverse Event Without Identified Device or Use Problem	Cataract; Appropriate Clinical Signs, Symptoms, Conditions Term / Code Not Available	NA	NA	1	Event Description: THE REPORTER INDICATED THE SURGEON IMPLANTED A 12.1MM VICM5_12.1 IMPLANTABLE COLLAMER LENS, -07.50 DIOPTER, INTO THE PATIENTS RIGHT EYE (OD), ON (B)(6) 2021. THIS WAS THE REPLACEMENT LENS FOR MFR. REPORT #2023826-2021-03481 AND THE PROBLEM WAS NOT RESOLVED. THE PATIENT NOW HAS A SMALL ANTERIOR SUBCAPSULAR CATARACT AND VISION IS WORSE. THE LENS REMAINED IMPLANTED. ADDITIONAL INF…	Lens Retention	Not_Resolved
https://www.accessdata.fda.gov/scripts/cdrh/cfdocs/cfMAUDE/Detail.CFM?MDRFOI__ID=10900067&pc=MTA	2023826-2020-02747	NA	Injury	STAAR SURGICAL COMPANY AG	2020-11-25 05:00:00	MTA	IMPLANTABLE COLLAMER LENS (ICL)	Adverse Event Without Identified Device or Use Problem	Cataract; Appropriate Clinical Signs, Symptoms, Conditions Term / Code Not Available	NA#S-P#NA	NA	1	Event Description: THE REPORTER INDICATED THE SURGEON IMPLANTED A 12.0MM ICM120V4 IMPLANTABLE COLLAMER LENS, -13.50 DIOPTER, IN THE PATIENTS LEFT EYE (OS) ON (B)(6) 2013. THE REPORTER INDICATED A CATARACT HAD DEVELOPED. THE LENS REMAINED IMPLANTED. ADDITIONAL INFORMATION HAS BEEN REQUESTED BUT NONE HAS BEEN FORTHCOMING. IF ADDITIONAL INFORMATION IS RECEIVED, A SUPPLEMENTAL MEDWATCH WILL BE SUBMIT…	Lens Extraction + Secondary Operation	unknown
https://www.accessdata.fda.gov/scripts/cdrh/cfdocs/cfMAUDE/Detail.CFM?MDRFOI__ID=15848263&pc=MTA	2023826-2022-04295	2022-10-06	Injury	STAAR SURGICAL COMPANY	2022-11-22	MTA	IMPLANTABLE COLLAMER LENS (ICL)	Patient-Device Incompatibility; Adverse Event Without Identified Device or Use Problem	Cataract; Appropriate Clinical Signs, Symptoms, Conditions Term / Code Not Available	P030016	NA	1	Event Description: THE REPORTER INDICATED THAT THE SURGEON IMPLANTED A 12.6MM MICL12.6; -14.0 DIOPTER IMPLANTABLE COLLAMER LENS INTO THE PATIENT'S LEFT EYE (OS) ON (B)(6) 2020. THE SURGEON REPORTS LENS OPACITY OF ASC AND PSC WHICH WAS OBSERVED ON (B)(6) 2021. ON (B)(6) 2022 THE LENS WAS EXPLANTED AND PHACO-EMULSIFICATION AND IOL IMPLANTATION WAS PERFORMED. THE PROBLEM AS RESOLVED. THE CAUSE OF TH…	Lens Extraction + Secondary Operation	Resolved
https://www.accessdata.fda.gov/scripts/cdrh/cfdocs/cfMAUDE/Detail.CFM?MDRFOI__ID=17547267&pc=MTA	2023826-2023-03522	2023-03-22	Injury	STAAR SURGICAL COMPANY	2023-08-14	MTA	IMPLANTABLE COLLAMER LENS (ICL)	Misfocusing	Cataract; Blurred Vision	P030016	NA	1	Event Description: THE REPORTER INDICATED THAT A 12.1MM MICL12.1 IMPLANTABLE COLLAMER LENS OF -11.50 DIOPTER WAS IMPLANTED INTO THE PATIENT'S RIGHT EYE (OD) ON (B)(6) 2023. ON (B)(6) 2023 THE LENS WAS EXPLANTED DUE TO REFRACTIVE SURPRISE AND LENS OPACITY. IT WAS REPORTED THAT REFRACTIVE TREATMENT AND PHACO-EMULSIFICATION WITH IOL IMPLANTATION WAS PERFORMED AND THE PROBLEM RESOLVED. THE REPORTER S…	Lens Extraction + Secondary Operation	Resolved
https://www.accessdata.fda.gov/scripts/cdrh/cfdocs/cfMAUDE/Detail.CFM?MDRFOI__ID=10158233&pc=MTA	2023826-2020-01235	2020-03-23	Injury	STAAR SURGICAL COMPANY	2020-06-16	MTA	IMPLANTABLE COLLAMER LENS (ICL)	Misfocusing; Adverse Event Without Identified Device or Use Problem	Cataract; Blurred Vision	N/A	NA	1	Event Description: THE REPORTER INDICATED THE SURGEON IMPLANTED A 13.2MM VICM5_13.2 IMPLANTABLE COLLAMER LENS, -04.00 DIOPTER, IN THE PATIENTS LEFT EYE (OS) ON (B)(6) 2020. THE SURGEON NOTED AN ANTERIOR SUBCAPSULAR OPACITY IN THE PATIENTS EYE ON (B)(6) 2020. THE PATIENT COMPLAINED OF BLURRED VISION. EXPLANTATION OF THE LENS AND CLEAR LENS SURGERY IS PLANNED FOR (B)(6) 2020. THE LENS REMAINS IMPLA…	Lens Extraction + Secondary Operation	Resolved
https://www.accessdata.fda.gov/scripts/cdrh/cfdocs/cfMAUDE/Detail.CFM?MDRFOI__ID=12914025&pc=MTA	2023826-2021-04571	NA	Injury	STAAR SURGICAL COMPANY	2021-12-01 05:00:00	MTA	IMPLANTABLE COLLAMER LENS (ICL)	Misfocusing; Off-Label Use	Cataract; Blurred Vision	P030016	NA	1	Event Description: THE PATIENT INDICATED THE SURGEON IMPLANTED A 12.1MM MICL12.1 IMPLANTABLE COLLAMER LENS, -13.00 DIOPTER, IN HIS LEFT EYE (OS) ON (B)(6) 2021. THE PATIENT REPORTED EXPERIENCING BLURRY/CLOUDY VISION ONE WEEK AFTER ICL IMPLANTATION, REPORTEDLY DUE TO PREDNISOLONE, WHICH WAS PRESCRIBED AFTER IMPLANTATION. THE PREDNISOLONE WAS DISCONTINUED. CATARACTS WERE OBSERVED. THE LENS REMAINED…	Lens Retention	Not_Resolved
https://www.accessdata.fda.gov/scripts/cdrh/cfdocs/cfMAUDE/Detail.CFM?MDRFOI__ID=14252557&pc=MTA	2023826-2022-01313	2022-02-15	Injury	STAAR SURGICAL COMPANY	2022-04-29	MTA	IMPLANTABLE COLLAMER LENS (ICL)	Off-Label Use; Adverse Event Without Identified Device or Use Problem	Cataract; Blurred Vision	NA	NA	1	Event Description: THE REPORTER INDICATED THAT A 12.1MM, VICMO12.1 -5.0 DIOPTER, IMPLANTABLE COLLAMER LENS WAS IMPLANTED INTO THE PATIENTS LEFT EYE (OS) ON (B)(6) 2021. LENS OPACITY WAS OBSERVED ON (B)(6) 2022. ON (B)(6) 2022 THE LENS WAS EXPLANTED AND THE PROBLEM RESOLVED. CAUSE OF EVENT WAS UNKNOWN. FOR ADDITIONAL INFORMATION THE REPORTER STATED " THE PATIENT WAS ADMITTED TO THE CATARACT DEPART…	Lens Extraction + Secondary Operation	Resolved
https://www.accessdata.fda.gov/scripts/cdrh/cfdocs/cfMAUDE/Detail.CFM?MDRFOI__ID=14253045&pc=MTA	2023826-2022-01314	2022-02-15	Injury	STAAR SURGICAL COMPANY	2022-04-29	MTA	IMPLANTABLE COLLAMER LENS (ICL)	Off-Label Use; Adverse Event Without Identified Device or Use Problem	Cataract; Blurred Vision	NA	NA	1	Event Description: THE REPORTER INDICATED THAT A 12.1MM, VICMO12.1 -5.0 DIOPTER, IMPLANTABLE COLLAMER LENS WAS IMPLANTED INTO THE PATIENTS RIGHT EYE (OD) ON (B)(6) 2021. LENS OPACITY WAS OBSERVED ON (B)(6) 2022. ON (B)(6) 2022 THE LENS WAS EXPLANTED AND THE PROBLEM RESOLVED. CAUSE OF EVENT WAS UNKNOWN. FOR ADDITIONAL INFORMATION THE REPORTER STATED " THE PATIENT HAD PAINLESS PROGRESSIVE VISION LO…	Lens Extraction + Secondary Operation	Resolved
https://www.accessdata.fda.gov/scripts/cdrh/cfdocs/cfMAUDE/Detail.CFM?MDRFOI__ID=13374207&pc=MTA	2023826-2022-00351	NA	Injury	STAAR SURGICAL COMPANY	2022-01-27 05:00:00	MTA	IMPLANTABLE COLLAMER LENS (ICL)	Optical Problem	Cataract; Blurred Vision	NA	NA	1	Event Description: THE REPORTER INDICATED THAT A 12.6MM MICL12.6; -11.0 DIOPTER IMPLANTABLE COLLAMER LENS WAS IMPLANTED INTO THE PATIENT'S LEFT EYE (OS). IT WAS INDICATED THAT THE LENS WAS TOO FLAT AND RESULTED IN MINIMAL CLEARANCE OVER THE NATURAL LENS, AND THERE WAS A SLIGHT CATARACT WITH A "SOMEWHAT" HYPEROPIC OUTCOME. THE LENS WAS EXPLANTED ON (B)(6) 2021. A REPLACEMENT LENS OF LONGER LENGTH …	Lens Exchange	Resolved
https://www.accessdata.fda.gov/scripts/cdrh/cfdocs/cfMAUDE/Detail.CFM?MDRFOI__ID=12904968&pc=MTA	2023826-2021-04570	NA	Injury	STAAR SURGICAL COMPANY	2021-11-30 05:00:00	MTA	IMPLANTABLE COLLAMER LENS (ICL)	Misfocusing; Off-Label Use	Cataract; Blurred Vision; Halo	P030016	NA	1	Event Description: THE PATIENT INDICATED THE SURGEON IMPLANTED A (B)(4) IMPLANTABLE (B)(6) LENS, -12.00 DIOPTER, IN HIS RIGHT EYE (OD) ON (B)(6) 2021. THE PATIENT REPORTED EXPERIENCING BLURRY/CLOUDY VISION ONE WEEK AFTER ICL IMPLANTATION, REPORTEDLY DUE TO PREDNISOLONE, WHICH WAS PRESCRIBED AFTER IMPLANTATION. THE PREDNISOLONE WAS DISCONTINUED. CATARACTS WERE OBSERVED. THE PATIENT SEES HALOES IN …	Lens Retention	Not_Resolved
https://www.accessdata.fda.gov/scripts/cdrh/cfdocs/cfMAUDE/Detail.CFM?MDRFOI__ID=6191994&pc=MTA	2023826-2016-01814	NA	Injury	STAAR SURGICAL COMPANY AG	2016-12-20	MTA	ICL (IMPLANTABLE COLLAMER LENS)	Adverse Event Without Identified Device or Use Problem	Cataract; Blurred Vision; No Code Available	P030016	NA	1	Event Description: THE REPORTER STATED THE SURGEON IMPLANTED A 12.1MM MICL12.1 IMPLANTABLE COLLAMER LENS, -11.0 DIOPTER, ON (B)(6) 2009. THE LENS WAS EXPLANTED ON (B)(6) 2016 DUE TO THE DEVELOPMENT OF A CATARACT. THE PATIENT COMPLAINED OF BLURRY VISION AT NIGHT. THE CATARACT WAS REMOVED AND AN IOL WAS IMPLANTED. THE PATIENT IS DOING FINE. Manufacturer Narrative: DEVICE EVALUATED BY MANUFACTURER?:…	Lens Extraction + Secondary Operation	Resolved
https://www.accessdata.fda.gov/scripts/cdrh/cfdocs/cfMAUDE/Detail.CFM?MDRFOI__ID=4959171&pc=MTA	2023826-2015-00960	2014-12-08	Injury	STAAR SURGICAL COMPANY	2015-08-01	MTA	ICL (IMPLANTABLE COLLAMER LENS)	Appropriate Term/Code Not Available	Cataract; Blurred Vision; No Code Available	P030016	NA	1	Event Description: THE REPORTER INDICATED THE SURGEON IMPLANTED A 12.5MM ICM125V4 IMPLANTABLE COLLAMER LENS IN THE PATIENT'S RIGHT EYE (OD) ON (B)(6) 2014. THE LENS WAS EXPLANTED ON (B)(6) 2014 DUE TO LENS OPACITY (ANTERIOR SUBCAPSULAR OPACITY) AND BLURRED VISION. CATARACT SURGERY WAS PERFORMED BY PHACOEMULSIFICATION AND AN IOL WAS IMPLANTED. Manufacturer Narrative: (B)(4). METHOD: WORK ORDER SEA…	Lens Extraction + Secondary Operation	unknown
https://www.accessdata.fda.gov/scripts/cdrh/cfdocs/cfMAUDE/Detail.CFM?MDRFOI__ID=6140284&pc=MTA	2023826-2016-01711	2015-08-07	Injury	STAAR SURGICAL COMPANY	2016-12-01	MTA	ICL (IMPLANTABLE COLLAMER LENS)	Appropriate Term/Code Not Available	Cataract; Blurred Vision; No Code Available	P030016	NA	1	Event Description: THE REPORTER INDICATED THE SURGEON IMPLANTED A 12.1MM MICL12.1 IMPLANTABLE COLLAMER LENS, -12.0 DIOPTER, IN THE PATIENT'S LEFT EYE (OS) ON (B)(6) 2015. AT 3 MONTHS POST-OP, PATIENT WAS 20/25 UNCORRECTED AND THE PRESSURES WERE NORMAL. THE REPORTER INDICATED THE BEGINNING OF AN ANTERIOR SUBCAPSULAR CATARACT WAS NOTED AT THAT VISIT. THE LENS WAS EXPLANTED AND CATARACT SURGERY WAS …	Lens Extraction + Secondary Operation	unknown
https://www.accessdata.fda.gov/scripts/cdrh/cfdocs/cfMAUDE/Detail.CFM?MDRFOI__ID=6140273&pc=MTA	2023826-2016-01712	2015-08-07	Injury	STAAR SURGICAL COMPANY AG	2016-12-01	MTA	ICL (IMPLANTABLE COLLAMER LENS)	Appropriate Term/Code Not Available	Cataract; Blurred Vision; No Code Available	P030016	NA	1	Event Description: THE REPORTER INDICATED THE SURGEON IMPLANTED AN MICL IMPLANTABLE COLLAMER LENS, DIOPTER UNKNOWN, IN THE PATIENT'S RIGHT EYE (OD). THE REPORTER INDICATED A CATARACT HAD DEVELOPED. THE LENS REMAINS IMPLANTED BUT MAY BE REMOVED. ADDITIONAL INFORMATION HAS BEEN REQUESTED BUT NONE HAS BEEN FORTHCOMING. IF ADDITIONAL INFORMATION IS RECEIVED, A SUPPLEMENTAL MEDWATCH REPORT WILL BE SUB…	Lens Extraction + Secondary Operation	unknown
https://www.accessdata.fda.gov/scripts/cdrh/cfdocs/cfMAUDE/Detail.CFM?MDRFOI__ID=6978092&pc=MTA	2023826-2017-01620	2017-08-08	Injury	STAAR SURGICAL COMPANY	2017-10-25	MTA	IMPLANTABLE COLLAMER LENS (ICL)	Device Operates Differently Than Expected	Cataract; Blurred Vision; No Code Available	N/A	NA	1	Event Description: THE REPORTER INDICATED THAT THE SURGEON IMPLANTED A 13.2 MM VICMO13.2, DIOPTER -3.50 IMPLANTABLE COLLAMER LENS, INTO THE PATIENT'S LEFT EYE (OS) ON (B)(6) 2017. ON (B)(6) 2017 THE LENS WAS EXPLANTED, THE SURGEON NOTING LENS OPACITY-ASCO. SURGEON ALSO PERFORMED PHACO-EMULSIFICATION AND IOL IMPLANTATION. SURGEON STATES THAT THE PATIENT "DEVELOPED ASCO AFTER 5 MONTHS SURGERY." Man…	Lens Extraction + Secondary Operation	unknown
https://www.accessdata.fda.gov/scripts/cdrh/cfdocs/cfMAUDE/Detail.CFM?MDRFOI__ID=7021462&pc=MTA	2023826-2017-01676	2017-09-06	Injury	STAAR SURGICAL COMPANY	2017-11-10	MTA	IMPLANTABLE COLLAMER LENS (ICL)	Device Operates Differently Than Expected	Cataract; Blurred Vision; No Code Available	N/A	NA	1	Event Description: THE REPORTER INDICATED THAT THE SURGEON IMPLANTED A 12.1 MM VICM5_12.1, -11.50 DIOPTER, IMPLANTABLE COLLAMER LENS IN THE PATIENT'S LEFT EYE (OS) ON (B)(6) 2017. ON (B)(6) 2017, LOSS OF BCVA, FROM 20/40 TO 20/100, AND NS AND CORTICAL LENS OPACITY WAS NOTICED. THE LENS WAS EXPLANTED ON (B)(6) 2017. PHACO-EMULSIFICATION (CATARACT SURGERY) WAS PERFORMED AND AN IOL WAS IMPLANTED. ON…	Lens Extraction + Secondary Operation	unknown
https://www.accessdata.fda.gov/scripts/cdrh/cfdocs/cfMAUDE/Detail.CFM?MDRFOI__ID=7438479&pc=MTA	2023826-2018-00544	2018-03-16	Injury	STAAR SURGICAL COMPANY	2018-04-17	MTA	IMPLANTABLE COLLAMER LENS (ICL)	Inadequacy of Device Shape and/or Size	Cataract; Blurred Vision; No Code Available	N/A	NA	1	Event Description: THE REPORTER INDICATED THAT THE SURGEON IMPLANTED A 12.6 MM VICM12.6, -6.00 DIOPTER, IMPLANTABLE COLLAMER LENS IN THE PATIENT'S LEFT EYE (OS) IN 2011. ON (B)(6) 2018, LOW VAULT, BLURRED VISION, AS WELL AS ASC AND CORTICAL LENS OPACITY WERE NOTICED. SURGERY IS PLANNED TO CORRECT THE PROBLEMS. Manufacturer Narrative: THE REPORTER INDICATED THAT THE SURGEON IMPLANTED A 12.6MM VICM…	Lens Exchange	unknown
https://www.accessdata.fda.gov/scripts/cdrh/cfdocs/cfMAUDE/Detail.CFM?MDRFOI__ID=10190944&pc=MTA	2023826-2020-01388	2019-05-12	Injury	STAAR SURGICAL COMPANY	2020-06-24	MTA	IMPLANTABLE COLLAMER LENS (ICL)	Inadequacy of Device Shape and/or Size	Cataract; Blurred Vision; No Code Available	NA	NA	1	Event Description: A CASE REPORT WAS RECEIVED AND INDICATED THE SURGEON IMPLANTED A 11.5MM ICM115V4 IMPLANTABLE COLLAMER LENS, -22.50 DIOPTER, IN THE PATIENT'S LEFT EYE (OS) ON (B)(6) 2014. THE LENS WAS EXPLANTED ON (B)(6) 2019 DUE TO LOW VAULTING AND THE PATIENT DEVELOPED ANTERIOR SUBCAPSULAR CATARACT. THE PATIENT UNDERWENT FEMTOSECOND LASER ASSISTED CATARACT SURGERY (FLACS) COMBINED WITH ICL EX…	Lens Extraction + Secondary Operation	unknown
https://www.accessdata.fda.gov/scripts/cdrh/cfdocs/cfMAUDE/Detail.CFM?MDRFOI__ID=5252472&pc=MTA	2023826-2015-01553	2015-10-23	Injury	STAAR SURGICAL COMPANY AG	2015-11-26	MTA	ICL (IMPLANTABLE COLLAMER LENS)	Inadequacy of Device Shape and/or Size; Appropriate Term/Code Not Available	Cataract; Blurred Vision; No Code Available	NA	NA	1	Event Description: THE REPORTER INDICATED THE SURGEON IMPLANTED A 12.6MM VICM12.6 IMPLANTABLE COLLAMER LENS, -11.00 DIOPTER, IN THE PATIENT'S LEFT EYE (OS) ON (B)(6) 2011. THE LENS HAD A LOW VAULT, REFRACTIVE SURPRISE AND LENS OPACITY (ANTERIOR SUBCAPSULAR). THE SURGEON IS PLANNING TO EXPLANT AND EXCHANGE FOR A LONGER LENS. THE LENS REMAINS IMPLANTED. THE PATIENT'S POST-OP BEST-CORRECTED VISUAL A…	Lens Exchange	Resolved
https://www.accessdata.fda.gov/scripts/cdrh/cfdocs/cfMAUDE/Detail.CFM?MDRFOI__ID=6074711&pc=MTA	2023826-2016-01569	2016-01-26	Injury	STAAR SURGICAL COMPANY AG	2016-11-02	MTA	ICL (IMPLANTABLE COLLAMER LENS)	Inadequacy of Device Shape and/or Size; Appropriate Term/Code Not Available	Cataract; Blurred Vision; No Code Available	P030016	NA	1	Event Description: THE REPORTER INDICATED THE SURGEON IMPLANTED A 12.5MM ICM125V4 IMPLANTABLE COLLAMER LENS, -11.5 DIOPTER, IN THE PATIENT'S LEFT EYE (OS) ON (B)(6) 2015. THE LENS WAS EXPLANTED ON (B)(6) 2016 DUE TO LENS OPACITY (ANTERIOR SUBCAPSULAR AND POSTERIOR SUBCAPSULAR), WHICH WAS NOTED ON (B)(6) 2016. THE PATIENT EXPERIENCED BLURRED VISION. THE PATIENT WAS SCHEDULED FOR YAG CAPSULOTOMY. A…	Lens Extraction	unknown
https://www.accessdata.fda.gov/scripts/cdrh/cfdocs/cfMAUDE/Detail.CFM?MDRFOI__ID=6742631&pc=MTA	2023826-2017-01242	2016-11-21	Injury	STAAR SURGICAL COMPANY AG	2017-07-25	MTA	IMPLANTABLE COLLAMER LENS (ICL)	Insufficient Information	Cataract; Blurred Vision; No Code Available	P030016	NA	1	Event Description: THE REPORTER INDICATED THE SURGEON IMPLANTED A 13.2MM MICL13.2 IMPLANTABLE COLLAMER LENS, -8.0 DIOPTER, ON (B)(6) 2007. THE LENS WAS EXPLANTED DUE TO THE DEVELOPMENT OF A CATARACT. ADDITIONAL INFORMATION HAS BEEN REQUESTED BUT NONE HAS BEEN FORTHCOMING. IF ADDITIONAL INFORMATION IS RECEIVED, A SUPPLEMENTAL MEDWATCH REPORT WILL BE SUBMITTED. Manufacturer Narrative: NO SIMILAR CO…	Lens Extraction	unknown
https://www.accessdata.fda.gov/scripts/cdrh/cfdocs/cfMAUDE/Detail.CFM?MDRFOI__ID=7870372&pc=MTA	2023826-2018-01382	2017-06-01	Injury	STAAR SURGICAL COMPANY	2018-09-12	MTA	IMPLANTABLE COLLAMER LENS (ICL)	Misfocusing; Adverse Event Without Identified Device or Use Problem	Cataract; Blurred Vision; No Code Available	N/A	NA	1	Event Description: THE REPORTER INDICATED THE SURGEON IMPLANTED A 12.6MM VICMO12.6 IMPLANTABLE COLLAMER LENS, DIOPTER -15.5 INTO THE PATIENT'S RIGHT EYE (OD) ON (B)(6) 2015. ON (B)(6) 2018 THE LENS WAS EXPLANTED DUE TO LENS OPACITY (ASC); PHACO-EMULSIFICATION (CATARACT SURGERY) AND IOL IMPLANTATION WAS PERFORMED AND THE PROBLEM WAS RESOLVED. ACCORDING TO THE SURGEON, THE EXACT CAUSE OF THE CATARA…	Lens Extraction + Secondary Operation	Resolved
https://www.accessdata.fda.gov/scripts/cdrh/cfdocs/cfMAUDE/Detail.CFM?MDRFOI__ID=7438480&pc=MTA	2023826-2018-00543	2018-03-16	Injury	STAAR SURGICAL COMPANY	2018-04-17	MTA	IMPLANTABLE COLLAMER LENS (ICL)	Misfocusing; Inadequacy of Device Shape and/or Size	Cataract; Blurred Vision; No Code Available	N/A	NA	1	Event Description: THE REPORTER INDICATED THAT THE SURGEON IMPLANTED A 12.6 MM VICM12.6, -6.50 DIOPTER, IMPLANTABLE COLLAMER LENS IN THE PATIENT'S RIGHT EYE (OD) IN 2011. ON (B)(6) 2018, LOW VAULT, BLURRED VISION, AS WELL AS ASC AND CORTICAL LENS OPACITY WERE NOTICED. SURGERY IS PLANNED TO CORRECT PROBLEMS. Manufacturer Narrative: THE BEST CORRECTED VISUAL ACUITY (BCVA) FOR THE PATIENT IS CURRENT…	Lens Extraction	unknown
https://www.accessdata.fda.gov/scripts/cdrh/cfdocs/cfMAUDE/Detail.CFM?MDRFOI__ID=9938159&pc=MTA	2023826-2020-00798	NA	Injury	STAAR SURGICAL COMPANY	2020-04-08 04:00:00	MTA	IMPLANTABLE COLLAMER LENS (ICL)	Misfocusing; Inadequacy of Device Shape and/or Size; Patient-Device Incompatibility	Cataract; Blurred Vision; No Code Available	P030016	NA	1	Event Description: THE REPORTER INDICATED THE SURGEON IMPLANTED AN ICL IMPLANTABLE COLLAMER LENS, IN THE PATIENTS LEFT EYE (OS) IN (B)(6) 2019. THE PATIENT EXPERIENCED A REFRACTIVE SURPRISE AND THE VAULT IS MINIMAL. LASIK ENHANCEMENT WAS PERFORMED 9 MONTHS LATER. THE PATIENT HAS NOW DEVELOPED AN ANTERIOR CORTICAL CATARACT. THE LENS REMAINS IMPLANTED. ADDITIONAL INFORMATION HAS BEEN REQUESTED BUT …	Lens Extraction	unknown
https://www.accessdata.fda.gov/scripts/cdrh/cfdocs/cfMAUDE/Detail.CFM?MDRFOI__ID=8611974&pc=MTA	2023826-2019-00792	2019-02-23	Injury	STAAR SURGICAL COMPANY	2019-05-15	MTA	IMPLANTABLE COLLAMER LENS (ICL)	Misfocusing; Off-Label Use	Cataract; Blurred Vision; No Code Available	N/A	NA	1	Event Description: THE REPORTER INDICATED THAT THE SURGEON IMPLANTED A 12.6MM VTICM5_12.6, -4.50/0.5/150 (SPHERE/CYLINDER/AXIS) , IMPLANTABLE COLLAMER LENS INTO THE PATIENT'S LEFT EYE (OS) ON (B)(6) 2019. LOSS OF BCVA, BLURRED VISION, AND REFRACTIVE CHANGE OVERTIME WAS OBSERVED. THE LENS WAS REMOVED ON (B)(6) 2019. CAUSE OF THE EVENT IS REPORTED AS UNKNOWN. PHACOEMULSIFICATION (CATARACT SURGERY) …	Lens Extraction + Secondary Operation	unknown
https://www.accessdata.fda.gov/scripts/cdrh/cfdocs/cfMAUDE/Detail.CFM?MDRFOI__ID=14722066&pc=MTA	2023826-2022-01932	2022-05-09	Injury	STAAR SURGICAL COMPANY	2022-06-16	MTA	IMPLANTABLE COLLAMER LENS (ICL)	Misfocusing; Adverse Event Without Identified Device or Use Problem	Cataract; Blurred Vision; Visual Disturbances	P030016	NA	1	Event Description: THE REPORTER INDICATED THAT THE SURGEON IMPLANTED A 12.1MM VICM5_12.1; -12.00 DIOPTER IMPLANTABLE COLLAMER LENS INTO THE PATIENT'S LEFT EYE (OS) ON (B)(6) 2020. IT WAS REPORTED THAT THE PATIENT HAS LENS OPACITY (CATARACT ASC). IT WAS ALSO NOTED "THE INVESTIGATOR DISCUSSED THE DEVELOPMENT OF ANTERIOR SUBCAPSULAR OPACITIES WITH THE PATIENT AND THE DECISION WAS MADE TO MONITOR THE…	Lens Extraction + Secondary Operation	Resolved
https://www.accessdata.fda.gov/scripts/cdrh/cfdocs/cfMAUDE/Detail.CFM?MDRFOI__ID=7069167&pc=MTA	2023826-2017-01792	2017-05-10	Injury	STAAR SURGICAL COMPANY	2017-11-29	MTA	IMPLANTABLE COLLAMER LENS (ICL)	Inadequacy of Device Shape and/or Size	Cataract; Blurred Vision; Visual Disturbances; Halo	P030016	NA	1	Event Description: THE REPORTER INDICATED THAT THE SURGEON IMPLANTED A MICL12.6, -5.0 DIOPTER, IMPLANTABLE COLLAMER LENS IN THE PATIENT'S LEFT EYE (OS) ON (B)(6) 2016. ON (B)(6) 2017, ANTERIOR LENS OPACITY WAS NOTICED AS WELL AS BLURRY VISION AT DISTANCE WITH SIGNIFICANT GLARE AND HALOES AND LOW VAULT AS THE ICL IS RUBBING AGAINST THE NATURAL LENS. THE LENS REMAINS IMPLANTED. THE LENS IS CURRENTL…	Lens Retention	unknown
https://www.accessdata.fda.gov/scripts/cdrh/cfdocs/cfMAUDE/Detail.CFM?MDRFOI__ID=7069168&pc=MTA	2023826-2017-01791	2017-05-10	Injury	STAAR SURGICAL COMPANY	2017-11-29	MTA	IMPLANTABLE COLLAMER LENS (ICL)	Inadequacy of Device Shape and/or Size	Cataract; Blurred Vision; Visual Disturbances; Halo	P030016	NA	1	Event Description: THE REPORTER INDICATED THAT THE SURGEON IMPLANTED A MICL12.6, -5.0 DIOPTER, IMPLANTABLE COLLAMER LENS IN THE PATIENT'S RIGHT EYE (OD) ON (B)(6) 2016. ON (B)(6) 2017, ANTERIOR LENS OPACITY WAS NOTICED AS WELL AS BLURRY VISION AT DISTANCE WITH SIGNIFICANT GLARE AND HALOES AND LOW VAULT AS THE ICL IS RUBBING AGAINST THE NATURAL LENS. THE LENS REMAINS IMPLANTED. THE LENS IS CURRENT…	Lens Retention	unknown
https://www.accessdata.fda.gov/scripts/cdrh/cfdocs/cfMAUDE/Detail.CFM?MDRFOI__ID=6877264&pc=MTA	2023826-2017-01463	2016-10-20	Injury	STAAR SURGICAL COMPANY	2017-09-19	MTA	IMPLANTABLE COLLAMER LENS (ICL)	Inadequacy of Device Shape and/or Size; Device Dislodged or Dislocated	Cataract; Blurred Vision; Visual Disturbances; Halo; No Code Available	N/A	NA	1	Event Description: THE REPORTER INDICATED THAT THE SURGEON IMPLANTED A 12.0MM ICM12.0 IMPLANTABLE COLLAMER LENS, -21.5 DIOPTER, INTO THE PATIENT'S LEFT EYE (OS) ON (B)(6) 2012. ON (B)(6) 2016 THE LENS WAS EXPLANTED. THE SURGEON NOTED LOW VAULT, LENS ROTATION, LENS OPACITY ASCO, AND "ARTIPHAKIA" AS THE STATUS OF THE EYE. PHACO-EMULSIFICATION (CATARACT SURGERY) AND IOL IMPLANTATION IS ALSO REPORTED…	Lens Extraction + Secondary Operation	unknown
https://www.accessdata.fda.gov/scripts/cdrh/cfdocs/cfMAUDE/Detail.CFM?MDRFOI__ID=5816274&pc=MTA	2023826-2016-00974	2016-06-13	Injury	STAAR SURGICAL COMPANY	2016-07-22	MTA	ICL (IMPLANTABLE COLLAMER LENS)	Inadequacy of Device Shape and/or Size; Appropriate Term/Code Not Available	Cataract; Cataract, Induced; Corneal Edema; Intraocular Pressure Increased; Blurred Vision; Loss of Vision; No Code Available	N/A	NA	1	Event Description: THE REPORTER INDICATED THAT THE SURGEON IMPLANTED A 13.2MM VICMO13.2 IMPLANTABLE COLLAMER LENS, -14.0 DIOPTER, IN THE PATIENT'S RIGHT EYE (OD) ON (B)(6) 2016. THE LENS WAS EXPLANTED ON (B)(6) 2016 DUE TO AN EXCESSIVE VAULT, LENS OPACITY (CATARACT), AND LOSS OF VISION. THE PATIENT EXPERIENCED AN ELEVATED IOP, SIGNIFICANT REDUCTION OF IRIDO-CORNEAL ANGLES, ANGLE CLOSURE, BLURRED …	Lens Extraction	Not_Resolved
https://www.accessdata.fda.gov/scripts/cdrh/cfdocs/cfMAUDE/Detail.CFM?MDRFOI__ID=5661678&pc=MTA	2023826-2016-00727	NA	Injury	STAAR SURGICAL COMPANY	2016-05-17	MTA	ICL (IMPLANTABLE COLLAMER LENS)	Appropriate Term/Code Not Available	Cataract; Cataract, Induced; Loss of Vision; No Code Available	P030016	NA	1	Event Description: THE PATIENT REPORTED THE SURGEON IMPLANTED A 12.6MM MICL12.6 IMPLANTABLE COLLAMER LENS, -11.5 DIOPTER, IN HER LEFT EYE (OS). THE PATIENT REPORTED HAD LOST VISION DUE TO THE DEVELOPMENT OF A CATARACT AND THE LENS WAS EXPLANTED. CATARACT SURGERY WAS PERFORMED. ADDITIONAL INFORMATION HAS BEEN REQUESTED BUT NONE HAS BEEN FORTHCOMING. IF ADDITIONAL INFORMATION IS RECEIVED, A SUPPLEM…	Lens Extraction + Secondary Operation	unknown
https://www.accessdata.fda.gov/scripts/cdrh/cfdocs/cfMAUDE/Detail.CFM?MDRFOI__ID=5553032&pc=MTA	2023826-2016-00401	2014-08-13	Injury	STAAR SURGICAL COMPANY AG	2016-04-06	MTA	ICL (IMPLANTABLE COLLAMER LENS)	Appropriate Term/Code Not Available	Cataract; Cataract, Induced; No Code Available	P030016	NA	1	Event Description: THE REPORTER INDICATED THE SURGEON IMPLANTED A 11.5MM ICM115V4 IMPLANTABLE COLLAMER LENS, -19.5 DIOPTER, IN THE PATIENT'S LEFT EYE (OS) ON (B)(6) 2008. THE LENS WAS EXPLANTED ON (B)(6) 2015 DUE TO LENS OPACITY (ANTERIOR SUBCAPSULAR). THE CATARACT WAS REMOVED AND AN IOL WAS IMPLANTED. THE PATIENT'S POST-OP BEST-CORRECTED VISUAL ACUITY WAS 20/20._x000D_ Manufacturer Narrative: TH…	Lens Extraction + Secondary Operation	Resolved
https://www.accessdata.fda.gov/scripts/cdrh/cfdocs/cfMAUDE/Detail.CFM?MDRFOI__ID=6140257&pc=MTA	2023826-2016-01700	2016-10-18	Injury	STAAR SURGICAL COMPANY	2016-12-01	MTA	ICL (IMPLANTABLE COLLAMER LENS)	Device Operates Differently Than Expected; Adverse Event Without Identified Device or Use Problem	Cataract; Cataract, Induced; No Code Available	N/A	NA	1	Event Description: THE REPORTER INDICATED THAT THE SURGEON IMPLANTED A 13.2 MM VICM513.2 IMPLANTABLE COLLAMER LENS, -10.00 DIOPTER IN THE PATIENT'S RIGHT EYE (OD) ON (B)(6) 2016. THE LENS WAS EXPLANTED ON (B)(6) 2016 DUE TO THE PATIENT DEVELOPING A CATARACT AND RECEIVING PHACO-EMULSIFICATION (CATARACT SURGERY) AND IOL IMPLANTATION. Manufacturer Narrative: ADDITIONAL DATA: DEVICE EVALUATION: PRODU…	Lens Extraction + Secondary Operation	unknown
https://www.accessdata.fda.gov/scripts/cdrh/cfdocs/cfMAUDE/Detail.CFM?MDRFOI__ID=6140262&pc=MTA	2023826-2016-01699	2016-10-18	Injury	STAAR SURGICAL COMPANY	2016-12-01	MTA	ICL (IMPLANTABLE COLLAMER LENS)	Device Operates Differently Than Expected; Adverse Event Without Identified Device or Use Problem	Cataract; Cataract, Induced; No Code Available	N/A	NA	1	Event Description: THE REPORTER INDICATED THAT THE SURGEON IMPLANTED A 13.2 MM VICM513.2 IMPLANTABLE COLLAMER LENS, -10.00 DIOPTER IN THE PATIENT'S LEFT EYE (OS) ON (B)(6) 2016. THE LENS WAS EXPLANTED ON (B)(6) 2016 DUE TO PATIENT DEVELOPING A CATARACT AND RECEIVING PHACO-EMULSIFICATION (CATARACT SURGERY) AND IOL IMPLANTATION. Manufacturer Narrative: DEVICE EVALUATION: PRODUCT EVALUATION FOUND TH…	Lens Extraction + Secondary Operation	unknown
https://www.accessdata.fda.gov/scripts/cdrh/cfdocs/cfMAUDE/Detail.CFM?MDRFOI__ID=5293149&pc=MTA	2023826-2015-01656	2013-08-17	Injury	STAAR SURGICAL COMPANY	2015-12-14	MTA	ICL (IMPLANTABLE COLLAMER LENS)	Device Operates Differently Than Expected; Appropriate Term/Code Not Available	Cataract; Cataract, Induced; No Code Available	P030016	NA	1	Event Description: THE REPORTER INDICATED THE SURGEON IMPLANTED A 11.5MM ICM115V4 -15.50 DIOPTER IMPLANTABLE COLLAMER LENS IN THE PATIENT'S RIGHT EYE (OD) ON (B)(6) 2010. A ANTERIOR SUBCAPSULAR CATARACT WAS OBSERVED ON (B)(6) 2013. THE LENS WAS EXPLANTED, CATARACT SURGERY AND A IOL WAS IMPLANTATION WAS PERFORMED ON (B)(6) 2015. PATIENT'S LAST VISIT ON (B)(6) 2015, BCVA WAS 20/20. Manufacturer Nar…	Lens Extraction + Secondary Operation	Resolved
https://www.accessdata.fda.gov/scripts/cdrh/cfdocs/cfMAUDE/Detail.CFM?MDRFOI__ID=5266255&pc=MTA	2023826-2015-01603	2014-12-27	Injury	STAAR SURGICAL COMPANY	2015-12-04	MTA	ICL (IMPLANTABLE COLLAMER LENS)	Device Operates Differently Than Expected; Appropriate Term/Code Not Available	Cataract; Cataract, Induced; No Code Available	NA	NA	1	Event Description: THE REPORTER INDICATED THE SURGEON IMPLANTED A 12.1MM VICM12.1, -11.00 DIOPTER IMPLANTABLE COLLAMER LENS IN THE PATIENT'S LEFT EYE (OS) ON (B)(6) 2013. A ANTERIOR SUBCAPSULAR CATARACT OPACITY WAS OBSERVED ON (B)(6) 2014. THE LENS WAS EXPLANTED AND EXCHANGED FOR A VICMO LENS, SAME LENGTH AND SIMILAR DIOPTER SIZE ON (B)(6) 2015. THIS RESOLVED THE PROBLEM. THE CATARACT IS BEING MO…	Lens Exchange	Resolved
https://www.accessdata.fda.gov/scripts/cdrh/cfdocs/cfMAUDE/Detail.CFM?MDRFOI__ID=5293173&pc=MTA	2023826-2015-01654	2015-01-15	Injury	STAAR SURGICAL COMPANY	2015-12-14	MTA	ICL (IMPLANTABLE COLLAMER LENS)	Device Operates Differently Than Expected; Appropriate Term/Code Not Available	Cataract; Cataract, Induced; No Code Available	P030016	NA	1	Event Description: THE REPORTER INDICATED THE SURGEON IMPLANTED A 11.5MM ICM 115V4 -13.00 DIOPTER IMPLANTABLE COLLAMER LENS IN THE PATIENT'S LEFT EYE (OS) ON (B)(6) 2007. A ANTERIOR SUBCAPSULAR CATARACT WAS OBSERVED ON (B)(6) 2015. THE LENS WAS EXPLANTED, CATARACT SURGERY AND A IOL WAS IMPLANTATION WAS PERFORMED ON (B)(6) 2015. PATIENT'S LAST VISIT ON (B)(6) 2015, BCVA WAS 20/20._x000D_ Event Des…	Lens Extraction + Secondary Operation	unknown
https://www.accessdata.fda.gov/scripts/cdrh/cfdocs/cfMAUDE/Detail.CFM?MDRFOI__ID=5304862&pc=MTA	2023826-2015-01615	2015-01-24	Injury	STAAR SURGICAL COMPANY AG	2015-12-16	MTA	ICL (IMPLANTABLE COLLAMER LENS)	Device Operates Differently Than Expected; Appropriate Term/Code Not Available	Cataract; Cataract, Induced; No Code Available	P030016	NA	1	Event Description: THE REPORTER INDICATED THE SURGEON IMPLANTED A 11.5MM ICM115V4 IMPLANTABLE COLLAMER LENS, -13.0 DIOPTER, IN THE PATIENT'S LEFT EYE (OS) ON (B)(6) 2012. THE LENS WAS EXPLANTED ON (B)(6) 2015 DUE TO LENS OPACITY (ANTERIOR SUBCAPSULAR). THE CATARACT WAS REMOVED BY PHACO-EMULSIFICATION AND AN INTRAOCULAR LENS WAS IMPLANTED._x000D_ Manufacturer Narrative: DEVICE EVALUATION: THE LENS…	Lens Extraction + Secondary Operation	unknown
https://www.accessdata.fda.gov/scripts/cdrh/cfdocs/cfMAUDE/Detail.CFM?MDRFOI__ID=5305142&pc=MTA	2023826-2015-01614	2015-01-24	Injury	STAAR SURGICAL COMPANY AG	2015-12-16	MTA	ICL (IMPLANTABLE COLLAMER LENS)	Device Operates Differently Than Expected; Appropriate Term/Code Not Available	Cataract; Cataract, Induced; No Code Available	P030016	NA	1	Event Description: THE REPORTER INDICATED THE SURGEON IMPLANTED A 11.5MM ICM115V4 IMPLANTABLE COLLAMER LENS, -13.0 DIOPTER, IN THE PATIENT'S RIGHT EYE (OD) ON (B)(6) 2012. THE LENS WAS EXPLANTED ON (B)(6) 2015 DUE TO LENS OPACITY (ANTERIOR SUBCAPSULAR). THE CATARACT WAS REMOVED BY PHACO-EMULSIFICATION AND AN INTRAOCULAR LENS WAS IMPLANTED. Manufacturer Narrative: DEVICE EVALUATION: PRODUCT EVALUA…	Lens Extraction + Secondary Operation	unknown
https://www.accessdata.fda.gov/scripts/cdrh/cfdocs/cfMAUDE/Detail.CFM?MDRFOI__ID=5378594&pc=MTA	2023826-2015-01668	2015-04-03	Injury	STAAR SURGICAL COMPANY AG	2016-01-19	MTA	ICL (IMPLANTABLE COLLAMER LENS)	Device Operates Differently Than Expected; Appropriate Term/Code Not Available	Cataract; Cataract, Induced; No Code Available	P030016	NA	1	Event Description: THE REPORTER INDICATED THE SURGEON IMPLANTED A 11.5MM ICM115V4 IMPLANTABLE COLLAMER LENS, -11.0 DIOPTER, IN THE PATIENT'S LEFT EYE (OS) ON (B)(6) 2012. THE LENS WAS EXPLANTED ON (B)(6) 2015 DUE TO LENS OPACITY (ANTERIOR SUBCAPSULAR). THE PATIENT'S POST-OP BEST-CORRECTED VISUAL ACUITY WAS 20/20. Manufacturer Narrative: DEVICE EVALUATION: PRODUCT EVALUATION FOUND THAT THE LENS WA…	Lens Extraction	unknown
https://www.accessdata.fda.gov/scripts/cdrh/cfdocs/cfMAUDE/Detail.CFM?MDRFOI__ID=5292426&pc=MTA	2023826-2015-01655	2015-08-20	Injury	STAAR SURGICAL COMPANY	2015-12-12	MTA	ICL (IMPLANTABLE COLLAMER LENS)	Device Operates Differently Than Expected; Appropriate Term/Code Not Available	Cataract; Cataract, Induced; No Code Available	P030016	NA	1	Event Description: THE REPORTER INDICATED THE SURGEON IMPLANTED A 11.5MM ICM115V4 -19.00 DIOPTER IMPLANTABLE COLLAMER LENS IN THE PATIENT'S RIGHT EYE (OD) ON (B)(6) 2005. A ANTERIOR SUBCAPSULAR CATARACT WAS OBSERVED ON (B)(6) 2015. THE LENS WAS EXPLANTED, CATARACT SURGERY AND A IOL WAS IMPLANTATION WAS PERFORMED ON (B)(6) 2015. PATIENT'S LAST VISIT ON (B)(6) 2015, BCVA WAS 20/20._x000D_ Manufactu…	Lens Extraction + Secondary Operation	unknown
https://www.accessdata.fda.gov/scripts/cdrh/cfdocs/cfMAUDE/Detail.CFM?MDRFOI__ID=5549348&pc=MTA	2023826-2016-00387	2015-09-07	Injury	STAAR SURGICAL COMPANY AG	2016-04-05	MTA	ICL (IMPLANTABLE COLLAMER LENS)	Device Operates Differently Than Expected; Appropriate Term/Code Not Available	Cataract; Cataract, Induced; No Code Available	P030016	NA	1	Event Description: THE REPORTER INDICATED THE SURGEON IMPLANTED A 12.0MM ICM120V4 -22.00 DIOPTER IMPLANTABLE COLLAMER LENS IN PATIENT'S RIGHT EYE ON (B)(6) 2013. AN ANTERIOR SUBCAPSULAR CATARACT WAS OBSERVED AND ON (B)(6) 2015, THE LENS WAS EXPLANTED AND NO OTHER LENS WAS IMPLANTED. Manufacturer Narrative: DEVICE EVALUATION: PRODUCT EVALUATION FOUND THAT THE LENS WAS RETURNED DRY IN LENS CASE/VIA…	Lens Extraction	unknown
https://www.accessdata.fda.gov/scripts/cdrh/cfdocs/cfMAUDE/Detail.CFM?MDRFOI__ID=5919743&pc=MTA	2023826-2016-01203	2015-10-23	Injury	STAAR SURGICAL COMPANY AG	2016-08-31	MTA	ICL (IMPLANTABLE COLLAMER LENS)	Device Operates Differently Than Expected; Appropriate Term/Code Not Available	Cataract; Cataract, Induced; No Code Available	N/A	NA	1	Event Description: THE REPORTER INDICATED THE SURGEON IMPLANTED A 11.5MM ICM115V4 IMPLANTABLE COLLAMER LENS, -17.5 DIOPTER, IN THE PATIENT'S RIGHT EYE (OD) ON (B)(6) 2008. THE LENS WAS EXPLANTED ON (B)(6) 2015 DUE TO LENS OPACITY (ANTERIOR SUBCAPSULAR). THE REPORTER INDICATED THERE WAS ADHESION AND DEGENERATION OF THE IRIS._x000D_ Manufacturer Narrative: ADDITIONAL INFORMATION: ON (B)(6) 2016, TH…	Lens Extraction	Not_Resolved
https://www.accessdata.fda.gov/scripts/cdrh/cfdocs/cfMAUDE/Detail.CFM?MDRFOI__ID=5931126&pc=MTA	2023826-2016-01226	2016-03-04	Injury	STAAR SURGICAL COMPANY AG	2016-09-06	MTA	ICL (IMPLANTABLE COLLAMER LENS)	Device Operates Differently Than Expected; Appropriate Term/Code Not Available	Cataract; Cataract, Induced; No Code Available	P030016	NA	1	Event Description: THE REPORTER INDICATED THAT THE SURGEON IMPLANTED A 12.0 MM ICM120V4 12.0 IMPLANTABLE COLLAMER LENS, -12.5 DIOPTER IN TO THE PATIENT'S LEFT EYE (OS) ON (B)(6) 2012. THE LENS WAS EXPLANTED ON (B)(6) 2016 DUE TO LENS OPACITY. THE PATIENT RECEIVED PHACO-EMULSIFICATION (CATARACT SURGERY), AND AN IOL WAS IMPLANTED._x000D_ Manufacturer Narrative: PRODUCT EVALUATION FOUND THAT THE LEN…	Lens Extraction + Secondary Operation	unknown
https://www.accessdata.fda.gov/scripts/cdrh/cfdocs/cfMAUDE/Detail.CFM?MDRFOI__ID=5934314&pc=MTA	2023826-2016-01225	2016-03-04	Injury	STAAR SURGICAL COMPANY AG	2016-09-07	MTA	ICL (IMPLANTABLE COLLAMER LENS)	Device Operates Differently Than Expected; Appropriate Term/Code Not Available	Cataract; Cataract, Induced; No Code Available	N/A	NA	1	Event Description: THE REPORTER INDICATED THAT THE SURGEON IMPLANTED A 12.0 MM ICM120V4 12.0 IMPLANTABLE COLLAMER LENS, -13.0 DIOPTER IN TO THE PATIENT'S RIGHT EYE (OD) ON (B)(6) 2012. THE LENS WAS EXPLANTED ON (B)(6) 2016 DUE TO LENS OPACITY. THE PATIENT RECEIVED PHACO-EMULSIFICATION (CATARACT SURGERY), AND AN IOL WAS IMPLANTED._x000D_ Manufacturer Narrative: DEVICE EVALUATION: PRODUCT EVALUATIO…	Lens Extraction + Secondary Operation	unknown
https://www.accessdata.fda.gov/scripts/cdrh/cfdocs/cfMAUDE/Detail.CFM?MDRFOI__ID=5923611&pc=MTA	2023826-2016-01208	2016-05-13	Injury	STAAR SURGICAL COMPANY	2016-09-01	MTA	ICL (IMPLANTABLE COLLAMER LENS)	Device Operates Differently Than Expected; Appropriate Term/Code Not Available	Cataract; Cataract, Induced; No Code Available	NA	NA	1	Event Description: THE REPORTER INDICATED THE SURGEON IMPLANTED A 13.2MM VICMO13.2 IMPLANTABLE COLLAMER LENS, -11.5 DIOPTER, IN THE PATIENT'S LEFT EYE (OS) ON (B)(6) 2016. THE LENS WAS EXPLANTED ON (B)(6) 2016 DUE TO LENS OPACITY (ANTERIOR SUBCAPSULAR). THE LENS WAS NOT EXCHANGED FOR ANOTHER LENS. THE PATIENT'S POST-OP BEST-CORRECTED VISUAL ACUITY WAS 20/25. Manufacturer Narrative: THE LENS WAS R…	Lens Extraction	unknown
https://www.accessdata.fda.gov/scripts/cdrh/cfdocs/cfMAUDE/Detail.CFM?MDRFOI__ID=5918280&pc=MTA	2023826-2016-01181	2016-06-14	Injury	STAAR SURGICAL COMPANY AG	2016-08-31	MTA	ICL (IMPLANTABLE COLLAMER LENS)	Device Operates Differently Than Expected; Appropriate Term/Code Not Available	Cataract; Cataract, Induced; No Code Available	N/A	NA	1	Event Description: THE REPORTER INDICATED THAT THE SURGEON IMPLANTED A 11.5 MM ICM115V4 IMPLANTABLE COLLAMER LENS, -17.5 DIOPTER IN TO THE PATIENT'S LEFT EYE (OS) ON (B)(6) 2012. THE LENS WAS EXPLANTED ON (B)(6) 2016 DUE TO LENS OPACITY. THE PATIENT'S POST-OP BEST CORRECTED VISUAL ACUITY WAS 20/20._x000D_ Manufacturer Narrative: ADDITIONAL INFORMATION: DEVICE EVALUATION: THE LENS WAS RETURNED DRY…	Lens Extraction	unknown
https://www.accessdata.fda.gov/scripts/cdrh/cfdocs/cfMAUDE/Detail.CFM?MDRFOI__ID=5972078&pc=MTA	2023826-2016-01311	2016-07-11	Injury	STAAR SURGICAL COMPANY	2016-09-22	MTA	ICL (IMPLANTABLE COLLAMER LENS)	Device Operates Differently Than Expected; Appropriate Term/Code Not Available	Cataract; Cataract, Induced; No Code Available	NA	NA	1	Event Description: THE REPORTER INDICATED THE SURGEON IMPLANTED A 12.1MM VICMO12.1 IMPLANTABLE COLLAMER LENS, -18.0 DIOPTER, IN THE PATIENT'S RIGHT EYE (OD) ON (B)(6) 2016. THE LENS WAS EXPLANTED ON (B)(6) 2016 DUE TO LENS OPACITY (ANTERIOR SUBCAPSULAR)._x000D_ Manufacturer Narrative: SERIAL # (B)(4), EXPIRATION DATE - 10/31/2018._x000D_ _x000D_ DEVICE MANUFACTURE DATE - 11/07/2015._x000D_ (B)(4)…	Lens Extraction	unknown
https://www.accessdata.fda.gov/scripts/cdrh/cfdocs/cfMAUDE/Detail.CFM?MDRFOI__ID=5553040&pc=MTA	2023826-2016-00403	2015-06-23	Injury	STAAR SURGICAL COMPANY AG	2016-04-06	MTA	ICL (IMPLANTABLE COLLAMER LENS)	Inadequacy of Device Shape and/or Size; Appropriate Term/Code Not Available	Cataract; Cataract, Induced; No Code Available	P030016	NA	1	Event Description: THE REPORTER INDICATED THE SURGEON IMPLANTED A 11.5MM ICM115V4 IMPLANTABLE COLLAMER LENS, -14.0 DIOPTER, IN THE PATIENT'S RIGHT EYE (OD) ON (B)(6) 2009. THE LENS WAS EXPLANTED ON (B)(6) 2015 DUE TO LOW VAULT AND LENS OPACITY (ANTERIOR SUBCAPSULAR). THE LENS WAS EXCHANGED FOR A LONGER LENS AND THE PROBLEM WAS RESOLVED._x000D_ Manufacturer Narrative: THE PATIENT'S POST-OP UNCORRE…	Lens Exchange	Resolved
https://www.accessdata.fda.gov/scripts/cdrh/cfdocs/cfMAUDE/Detail.CFM?MDRFOI__ID=5919728&pc=MTA	2023826-2016-01201	2015-11-16	Injury	STAAR SURGICAL COMPANY AG	2016-08-31	MTA	ICL (IMPLANTABLE COLLAMER LENS)	Inadequacy of Device Shape and/or Size; Appropriate Term/Code Not Available	Cataract; Cataract, Induced; No Code Available	P030016	NA	1	Event Description: THE REPORTER INDICATED THE SURGEON IMPLANTED A 12.0MM ICM120V4 IMPLANTABLE COLLAMER LENS, -03.0 DIOPTER, IN THE PATIENT'S RIGHT EYE (OD) ON (B)(6) 2011. THE LENS WAS EXPLANTED ON (B)(6) 2016 DUE TO LOW VAULTING AND LENS OPACITY (ANTERIOR SUBCAPSULAR). THE LENS WAS EXCHANGED FOR A LONGER LENS AND THE PROBLEM WAS RESOLVED.. THE PATIENT'S POST-OP BEST-CORRECTED VISUAL ACUITY WAS 2…	Lens Exchange	Resolved
https://www.accessdata.fda.gov/scripts/cdrh/cfdocs/cfMAUDE/Detail.CFM?MDRFOI__ID=5919733&pc=MTA	2023826-2016-01202	2015-11-16	Injury	STAAR SURGICAL COMPANY AG	2016-08-31	MTA	ICL (IMPLANTABLE COLLAMER LENS)	Inadequacy of Device Shape and/or Size; Appropriate Term/Code Not Available	Cataract; Cataract, Induced; No Code Available	N/A	NA	1	Event Description: THE REPORTER INDICATED THE SURGEON IMPLANTED A 12.5MM ICM125V4 IMPLANTABLE COLLAMER LENS, -03.0 DIOPTER, IN THE PATIENT'S LEFT EYE (OS) ON (B)(6) 2011. THE LENS WAS EXPLANTED ON (B)(6) 2016 DUE TO LOW VAULTING AND LENS OPACITY (ANTERIOR SUBCAPSULAR). THE LENS WAS EXCHANGED FOR A LONGER LENS AND THE PROBLEM WAS RESOLVED.. THE PATIENT'S POST-OP BEST-CORRECTED VISUAL ACUITY WAS 20…	Lens Exchange	Resolved
https://www.accessdata.fda.gov/scripts/cdrh/cfdocs/cfMAUDE/Detail.CFM?MDRFOI__ID=5553044&pc=MTA	2023826-2016-00405	2015-11-20	Injury	STAAR SURGICAL COMPANY AG	2016-04-06	MTA	ICL (IMPLANTABLE COLLAMER LENS)	Inadequacy of Device Shape and/or Size; Appropriate Term/Code Not Available	Cataract; Cataract, Induced; No Code Available	P030016	NA	1	Event Description: THE REPORTER INDICATED THE SURGEON IMPLANTED A 12.0MM ICM120V4 IMPLANTABLE COLLAMER LENS, -13.5 DIOPTER, IN THE PATIENT'S RIGHT EYE (OD) ON (B)(6) 2013. THE LENS WAS EXPLANTED ON (B)(6) 2015 DUE TO LOW VAULTING AND LENS OPACITY (ANTERIOR SUBCAPSULAR). THE LENS WAS EXCHANGED FOR A LONGER LENS AND THE PROBLEM WAS RESOLVED._x000D_ Manufacturer Narrative: DEVICE EVALUATION: LENS WA…	Lens Exchange	Resolved
https://www.accessdata.fda.gov/scripts/cdrh/cfdocs/cfMAUDE/Detail.CFM?MDRFOI__ID=5955097&pc=MTA	2023826-2016-01269	2015-12-30	Injury	STAAR SURGICAL COMPANY AG	2016-09-15	MTA	ICL (IMPLANTABLE COLLAMER LENS)	Inadequacy of Device Shape and/or Size; Appropriate Term/Code Not Available	Cataract; Cataract, Induced; No Code Available	N/A	NA	1	Event Description: THE REPORTER INDICATED THE SURGEON IMPLANTED A 12.1MM VICM12.1 IMPLANTABLE COLLAMER LENS, -9.5 DIOPTER, IN THE PATIENT'S LEFT EYE (OS) ON 03/14/2013. THE LENS WAS EXPLANTED ON (B)(6) 2016 DUE TO LOW VAULTING AND LENS OPACITY (ANTERIOR SUBCAPSULAR). THE LENS WAS EXCHANGED FOR A LONGER LENS AND THE PROBLEM WAS RESOLVED. Manufacturer Narrative: ON (B)(6) 2016, THE PATIENT'S UNCORR…	Lens Exchange	Resolved
https://www.accessdata.fda.gov/scripts/cdrh/cfdocs/cfMAUDE/Detail.CFM?MDRFOI__ID=5917886&pc=MTA	2023826-2016-01178	2016-02-11	Injury	STAAR SURGICAL COMPANY AG	2016-08-31	MTA	ICL (IMPLANTABLE COLLAMER LENS)	Inadequacy of Device Shape and/or Size; Appropriate Term/Code Not Available	Cataract; Cataract, Induced; No Code Available	N/A	NA	1	Event Description: THE REPORTER INDICATED THAT THE SURGEON IMPLANTED A 11.5 MM ICM115V4 IMPLANTABLE COLLAMER LENS, -17.0 DIOPTER IN TO THE PATIENT'S LEFT EYE (OS) ON (B)(6) 2011 . THE LENS WAS EXPLANTED ON (B)(6) 2016 DUE TO LOW VAULT AND LENS OPACITY. PHACO-EMULSIFICATION (CATARACT SURGERY) WAS PERFORMED ON THE PATIENT, AND AN IOL WAS IMPLANTED. THE PATIENT'S POST-OP UNCORRECTED VISUAL ACUITY WA…	Lens Extraction + Secondary Operation	Resolved
https://www.accessdata.fda.gov/scripts/cdrh/cfdocs/cfMAUDE/Detail.CFM?MDRFOI__ID=5579726&pc=MTA	2023826-2016-00480	2016-02-25	Injury	STAAR SURGICAL COMPANY AG	2016-04-14	MTA	ICL (IMPLANTABLE COLLAMER LENS)	Inadequacy of Device Shape and/or Size; Appropriate Term/Code Not Available	Cataract; Cataract, Induced; No Code Available	NA	NA	1	Event Description: THE REPORTER INDICATED THE SURGEON IMPLANTED A 12.6MM VICMO12.6 IMPLANTABLE COLLAMER LENS, -09.00 DIOPTER, IN THE PATIENT'S LEFT EYE (OS) ON (B)(6) 2012. THE LENS WAS EXPLANTED ON (B)(6) 2016 DUE TO LOW VAULTING AND LENS OPACITY (ANTERIOR SUBCAPSULAR), OBSERVED ON (B)(6) 2016. THE LENS WAS EXCHANGED FOR A LONGER LENS. THE PATIENT'S POST-OP BEST-CORRECTED VISUAL ACUITY WAS 20/20…	Lens Exchange	unknown
https://www.accessdata.fda.gov/scripts/cdrh/cfdocs/cfMAUDE/Detail.CFM?MDRFOI__ID=5971116&pc=MTA	2023826-2016-01228	2016-08-19	Injury	STAAR SURGICAL COMPANY	2016-09-22	MTA	ICL (IMPLANTABLE COLLAMER LENS)	Inadequacy of Device Shape and/or Size; Appropriate Term/Code Not Available	Cataract; Cataract, Induced; No Code Available	N/A	NA	1	Event Description: THE REPORTER INDICATED THAT THE SURGEON IMPLANTED A 13.2 MM VICMO13.2 IMPLANTABLE COLLAMER LENS, -10.5 DIOPTER IN TO THE PATIENT'S LEFT EYE (OS) ON (B)(6) 2016. THE LENS WAS EXPLANTED ON (B)(6) 2016 DUE TO LOW VAULT AND LENS OPACITY._x000D_ Manufacturer Narrative: ADDITIONAL INFORMATION: DEVICE EVALUATION: PRODUCT EVALUATION FOUND THAT THE LENS WAS RETURNED DRY IN THE LENS CASE…	Lens Extraction	unknown
https://www.accessdata.fda.gov/scripts/cdrh/cfdocs/cfMAUDE/Detail.CFM?MDRFOI__ID=5931212&pc=MTA	2023826-2016-01224	2015-06-13	Injury	STAAR SURGICAL COMPANY AG	2016-09-06	MTA	ICL (IMPLANTABLE COLLAMER LENS)	Inadequacy of Device Shape and/or Size; Device Operates Differently Than Expected; Appropriate Term/Code Not Available	Cataract; Cataract, Induced; No Code Available	N/A	NA	1	Event Description: THE REPORTER INDICATED THAT THE SURGEON IMPLANTED A 11.5 MM ICM115V4 IMPLANTABLE COLLAMER LENS, -7.5 DIOPTER IN TO THE PATIENT'S RIGHT EYE (OD) ON (B)(6) 2012. THE LENS WAS EXPLANTED ON (B)(6) 2015 DUE TO LOW VAULT AND LENS OPACITY. THE LENS WAS EXCHANGED FOR A LONGER LENS. THE PATIENT'S POST-OP UNCORRECTED VISUAL ACUITY WAS 20/20. Manufacturer Narrative: DEVICE EVALUATION: THE…	Lens Exchange	Resolved
https://www.accessdata.fda.gov/scripts/cdrh/cfdocs/cfMAUDE/Detail.CFM?MDRFOI__ID=8002463&pc=MTA	2023826-2018-01537	2018-05-17	Injury	STAAR SURGICAL COMPANY	2018-10-24	MTA	IMPLANTABLE COLLAMER LENS (ICL)	Patient-Device Incompatibility; Adverse Event Without Identified Device or Use Problem	Cataract; Cataract, Induced; No Code Available	NA	NA	1	Event Description: THE REPORTER INDICATED THE SURGEON IMPLANTED A 13.2MM VICMO13.2 IMPLANTABLE COLLAMER LENS, -08.00 DIOPTER, IN THE PATIENT'S LEFT EYE (OS) ON (B)(6) 2018. THE LENS WAS EXPLANTED ON (B)(6) 2018 DUE TO A NUCLEAR SCLEROTIC CATARACT AND A CAPSULAR TEAR. THE REPORTER INDICATED DURING THE SURGERY, THE PATIENT'S BILATERAL SUSPENSORY LIGAMENT WAS LOOSE AND THE LEFT ANTERIOR SUSPENSORY L…	Lens Extraction + Secondary Operation	unknown
https://www.accessdata.fda.gov/scripts/cdrh/cfdocs/cfMAUDE/Detail.CFM?MDRFOI__ID=8908388&pc=MTA	2023826-2019-01481	2019-03-11	Injury	STAAR SURGICAL COMPANY	2019-08-19	MTA	IMPLANTABLE COLLAMER LENS (ICL)	Misfocusing; Adverse Event Without Identified Device or Use Problem	Cataract; Cataract, Induced; Visual Disturbances; No Code Available	P030016	NA	1	Event Description: THE REPORTER INDICATED THE SURGEON IMPLANTED AN IMPLANTABLE COLLAMER LENS, IN THE PATIENTS RIGHT EYE (OD). THE REPORTER INDICATED EARLY ONSET CATARACT AND THE LENS REMAINS IMPLANTED. ADDITIONAL INFORMATION HAS BEEN REQUESTED BUT NONE HAS BEEN FORTHCOMING. IF ADDITIONAL INFORMATION IS RECEIVED, A SUPPLEMENTAL MEDWATCH WILL BE SUBMITTED. Manufacturer Narrative: ADDITIONAL DATA: B…	Lens Extraction + Secondary Operation	unknown
https://www.accessdata.fda.gov/scripts/cdrh/cfdocs/cfMAUDE/Detail.CFM?MDRFOI__ID=8908395&pc=MTA	2023826-2019-01482	2019-03-11	Injury	STAAR SURGICAL COMPANY	2019-08-19	MTA	IMPLANTABLE COLLAMER LENS (ICL)	Misfocusing; Adverse Event Without Identified Device or Use Problem	Cataract; Cataract, Induced; Visual Disturbances; No Code Available	P030016	NA	1	Event Description: THE REPORTER INDICATED THE SURGEON IMPLANTED AN IMPLANTABLE COLLAMER LENS, IN THE PATIENTS LEFT EYE (OS). THE REPORTER INDICATED EARLY ONSET CATARACT AND THE LENS REMAINS IMPLANTED. ADDITIONAL INFORMATION HAS BEEN REQUESTED BUT NONE HAS BEEN FORTHCOMING. IF ADDITIONAL INFORMATION IS RECEIVED, A SUPPLEMENTAL MEDWATCH WILL BE SUBMITTED. Manufacturer Narrative: ADDITIONAL DATA: B5…	Lens Extraction + Secondary Operation	unknown
https://www.accessdata.fda.gov/scripts/cdrh/cfdocs/cfMAUDE/Detail.CFM?MDRFOI__ID=15009430&pc=MTA	2023826-2022-02285	2022-06-15	Injury	STAAR SURGICAL COMPANY	2022-07-13	MTA	IMPLANTABLE COLLAMER LENS (ICL)	Adverse Event Without Identified Device or Use Problem	Cataract; Corneal Edema; Appropriate Clinical Signs, Symptoms, Conditions Term / Code Not Available	P030016	NA	1	Event Description: THE REPORTER INDICATED THAT THE SURGEON IMPLANTED A 13.2MM VICM5_13.2; -8.00 DIOPTER IMPLANTABLE COLLAMER LENS INTO THE PATIENT'S LEFT EYE (OS) ON (B)(6) 2022; AS A REPLACEMENT LENS FOR A PREVIOUS REFRACTIVE SURPRISE. THE PATIENT DEVELOPED LENS OPACITY (ASC) WHICH WAS ASSESSED ON (B)(6) 2022; CORNEAL/STROMAL OEDEMA AND DESCEMET FOLDS AND PHOTOPHOBIA WAS ALSO REPORTED. ON (B)(6)…	Lens Extraction + Secondary Operation	Not_Resolved
https://www.accessdata.fda.gov/scripts/cdrh/cfdocs/cfMAUDE/Detail.CFM?MDRFOI__ID=16464587&pc=MTA	2023826-2023-00588	NA	Injury	STAAR SURGICAL COMPANY	2023-03-01 05:00:00	MTA	IMPLANTABLE COLLAMER LENS (ICL)	Adverse Event Without Identified Device or Use Problem	Cataract; Corneal Edema; Appropriate Clinical Signs, Symptoms, Conditions Term / Code Not Available	P030016	NA	1	Event Description: THE REPORTER INDICATED THE SURGEON IMPLANTED A 13.2MM ICL IMPLANTABLE COLLAMER LENS, -07.50 DIOPTER, IN THE PATIENTS LEFT EYE (OS) IN 2022. THE LENS WAS REMOVED DUE TO POOR VISION, SINEQUIAS OF THE IRIS TO THE CORNEA AND CORNEAL EDEMA WITH VERY LOW ECC COUNTING. THE LENS WAS REPLACED WITH A SHORTER LENS. POST-OP, THERE IS AN ANTERIOR SUBCAPSULAR CATARACT AND OVAL PUPIL. ADDITIO…	Lens Exchange	unknown
https://www.accessdata.fda.gov/scripts/cdrh/cfdocs/cfMAUDE/Detail.CFM?MDRFOI__ID=12148280&pc=MTA	2023826-2021-02469	2021-04-06	Injury	STAAR SURGICAL COMPANY	2021-07-11	MTA	IMPLANTABLE COLLAMER LENS (ICL)	Adverse Event Without Identified Device or Use Problem	Cataract; Endophthalmitis; Blurred Vision	N/A	NA	1	Event Description: A 12.6MM VICM5_12.6 IMPLANTABLE COLLAMER LENS -14.0 DIOPTER WAS IMPLANTED INTO THE PATIENT'S RIGHT (OD) EYE ON (B)(6) 2021. THE SURGEON REPORTS PERMANENT LOSS OF BCVA AND ENDOPHTHALMITIS. DIAGNOSTICS WERE PERFORMED; NO ORGANISM WAS FOUND. A VITRECTOMY, INTRAVITREAL ANTIBIOTICS, AND A VITREOUS TAP WERE PERFORMED (B)(6) 2021. ON (B)(6) 2021 A VITRECTOMY WAS PERFORMED AND THE LENS…	Lens Extraction + Secondary Operation	Resolved
https://www.accessdata.fda.gov/scripts/cdrh/cfdocs/cfMAUDE/Detail.CFM?MDRFOI__ID=8519015&pc=MTA	2023826-2019-00607	2019-03-06	Injury	STAAR SURGICAL COMPANY	2019-04-16	MTA	IMPLANTABLE COLLAMER LENS (ICL)	Adverse Event Without Identified Device or Use Problem	Cataract; Endophthalmitis; Vitrectomy; No Code Available	N/A	NA	1	Event Description: THE REPORTER INDICATED THE SURGEON IMPLANTED A 13.2MM VICMO13.2 IMPLANTABLE COLLAMER LENS, DIOPTER -16.0 INTO THE PATIENT'S RIGHT EYE (OD) ON (B)(6) 2019. ONE DAY POST-OP THE PATIENT HAD EXAGGERATED INFLAMMATION AND EXUDATES IN THE EYE. THE PATIENT WAS DIAGNOSED WITH ACUTE ENDOPHTHALMITIS AND IMMEDIATELY WAS INJECTED WITH INTRAOCULAR ANTIBIOTICS. VITREOUS BIOPSY SAMPLE REVEALED…	Lens Extraction + Secondary Operation	Resolved
https://www.accessdata.fda.gov/scripts/cdrh/cfdocs/cfMAUDE/Detail.CFM?MDRFOI__ID=11435324&pc=MTA	MW5099834	2019-06-03	Malfunction	STAAR SURGICAL COMPANY	2021-03-05	MTA	STAAR SURGICAL ICL IMPLANT	Insufficient Information	Cataract; Foreign Body Sensation in Eye; Itching Sensation; Blurred Vision; Excessive Tear Production; Eye Pain	NA	NA	1	Event Description: I HAD ICL SURGERY ON (B)(6) 2009. IN 2011, I STARTED TO HAVE ISSUES WITH MY VISION. I HAD TO START WEARING EYE GLASSES TO DRIVE AND THEN ENDED UP WITH -1.25 VISION TO THIS DATE. IN (B)(6) 2019 I STARTED TO HAVE AN ITCHING/POKING FEELING IN MY RIGHT EYE. MY EYE CONTINUED TO WATER AND ITCH AS IF SOMETHING WAS POKING ME. I VISITED SEVERAL EYE DOCTORS, INCLUDING MY SURGEON WHO HAD …	unknown	unknown
https://www.accessdata.fda.gov/scripts/cdrh/cfdocs/cfMAUDE/Detail.CFM?MDRFOI__ID=11620596&pc=MTA	2023826-2021-00861	NA	Injury	STAAR SURGICAL COMPANY	2021-04-06 04:00:00	MTA	IMPLANTABLE COLLAMER LENS (ICL)	Misfocusing	Cataract; Foreign Body Sensation in Eye; Itching Sensation; Blurred Vision; Excessive Tear Production; Eye Pain	P030016	NA	1	Event Description: THE REPORTER INDICATED THAT THE SURGEON IMPLANTED A 12.1MM MICL12.1 IMPLANTABLE COLLAMER LENS, -10.0 DIOPTER, INTO THE PATIENT'S RIGHT (OD) EYE ON (B)(6) 2009. REPORTEDLY, THE PATIENT DEVELOPED LENS OPACITY CORTICAL, REFRACTIVE CHANGE OVER TIME, THE PATIENT HAD TO WEAR GLASSES TO DRIVE, A WATERY/ITCHING/POKING FEELING AND PAIN IN THE EYE. BLURRY VISION ALSO REPORTED. THE SURGEO…	unknown	unknown
https://www.accessdata.fda.gov/scripts/cdrh/cfdocs/cfMAUDE/Detail.CFM?MDRFOI__ID=11651554&pc=MTA	2023826-2021-00885	2021-06-21 04:00:00	Injury	STAAR SURGICAL COMPANY	2021-04-12 04:00:00	MTA	IMPLANTABLE COLLAMER LENS (ICL)	Misfocusing; Inadequacy of Device Shape and/or Size; Adverse Event Without Identified Device or Use Problem; Optical Problem	Cataract; Halo	N/A	NA	1	Event Description: THE REPORTER INDICATED THAT THE SURGEON IMPLANTED A 13.7MM VICM5 13.7, -10.50 (SPHERE/CYLINDER/AXIS), IMPLANTABLE COLLAMER LENS INTO THE PATIENT'S RIGHT EYE (OD) ON (B)(6) 2021. GLARE/HALOES WERE OBSERVED. THE LENS REMAINS IMPLANTED. SEE MFR # 2021-00884 FOR CLAIM AGAINST THE INITIAL LENS. ADDITIONAL INFORMATION HAS BEEN REQUESTED BUT NONE HAS BEEN FORTHCOMING. IF ADDITIONAL IN…	Lens Extraction + Secondary Operation	Resolved
https://www.accessdata.fda.gov/scripts/cdrh/cfdocs/cfMAUDE/Detail.CFM?MDRFOI__ID=9814249&pc=MTA	2023826-2020-00475	2020-01-17	Injury	STAAR SURGICAL COMPANY	2020-03-10	MTA	IMPLANTABLE COLLAMER LENS (ICL)	Misfocusing; Adverse Event Without Identified Device or Use Problem	Cataract; Headache; Blurred Vision; Visual Disturbances	NA	NA	1	Event Description: THE REPORTER INDICATED THE SURGEON IMPLANTED A 12.6MM VICM5_12.6 IMPLANTABLE COLLAMER LENS, -09.50, IN THE PATIENTS RIGHT EYE (OD), ON (B)(6) 2020. THE PATIENT EXPERIENCED A REFRACTIVE SURPRISE, BLURRED VISION, LOSS OF BEST CORRECTED VISUAL ACUITY AND LENS OPACITY (POSTERIOR SUBCAPSULAR) WAS NOTED. THE PATIENT IS SENSITIVE TO BRIGHT LIGHT AND HEADACHE WHEN READING. THE LENS REM…	Lens Extraction + Secondary Operation	Resolved
https://www.accessdata.fda.gov/scripts/cdrh/cfdocs/cfMAUDE/Detail.CFM?MDRFOI__ID=8090066&pc=MTA	2023826-2018-01697	2018-09-02	Injury	STAAR SURGICAL COMPANY	2018-11-20	MTA	IMPLANTABLE COLLAMER LENS (ICL)	Adverse Event Without Identified Device or Use Problem	Cataract; Hemorrhage/Bleeding; Hyphema; No Code Available	N/A	NA	1	Event Description: THE REPORTER INDICATED THE SURGEON IMPLANTED A 12.6MM VICMO12.6 IMPLANTABLE COLLAMER LENS, DIOPTER -9.0 INTO THE PATIENT'S LEFT EYE (OS) ON (B)(6) 2018. ON (B)(6) 2018 THE LENS WAS EXPLANTED DUE TO LENS OPACITY (ASC). REPORTEDLY, DURING THE INITIAL PROCEDURE, HEMORRHAGE OF AN IRIS VESSEL OCCURED. TO MANAGE THE IRIS BLEED THE SURGEON INTRODUCED BUBBLES INTO THE EYE. REPORTEDLY, …	Lens Extraction	Resolved
https://www.accessdata.fda.gov/scripts/cdrh/cfdocs/cfMAUDE/Detail.CFM?MDRFOI__ID=6305835&pc=MTA	2023826-2017-00223	NA	Injury	STAAR SURGICAL COMPANY	2017-02-06	MTA	ICL (IMPLANTABLE COLLAMER LENS)	Adverse Event Without Identified Device or Use Problem	Cataract; Inflammation; Loss of Vision	P030016	NA	1	Event Description: THE PATIENT REPORTED THE SURGEON IMPLANTED A MICL12.6 IMPLANTABLE COLLAMER LENS, -13.5 DIOPTER, IN THE LEFT EYE (OS). THE PATIENT REPORTED HAD LOST VISION DUE TO THE DEVELOPMENT OF A CATARACT AND WAS PRESCRIBED ORAL MEDICATIONS OR EYE DROPS FOR AT LEAST 3 CONSECUTIVE MONTHS DUE TO INSIDE OF EYE WAS INFLAMED. INFORMATION RECEIVED FROM THE FACILITY CONFIRMED THE PATIENT REPORT AN…	Lens Retention	Not_Resolved
https://www.accessdata.fda.gov/scripts/cdrh/cfdocs/cfMAUDE/Detail.CFM?MDRFOI__ID=9107373&pc=MTA	2023826-2019-01752	2019-05-30	Injury	STAAR SURGICAL COMPANY	2019-09-23	MTA	IMPLANTABLE COLLAMER LENS (ICL)	Off-Label Use; Adverse Event Without Identified Device or Use Problem	Cataract; Inflammation; Pain; Visual Disturbances; No Code Available	NA	NA	1	Event Description: THE REPORTER INDICATED THE SURGEON IMPLANTED A 12.1MM VICMO12.1 IMPLANTABLE COLLAMER LENS -18.00 DIOPTER, IN THE PATIENTS LEFT EYE (OS) ON (B)(6) 2019. A COUPLE OF HOURS AFTER THE INITIAL SURGERY, THE PATIENT EXPERIENCED PAIN AND A NEGATIVE EFFECT ON HER VISION. A CATARACT HAD DEVELOPED AND THE LENS WAS EXPLANTED. THE CATARACT WAS REMOVED AND A MONOFOCAL LENS WAS IMPLANTED ON (…	Lens Extraction + Secondary Operation	unknown
https://www.accessdata.fda.gov/scripts/cdrh/cfdocs/cfMAUDE/Detail.CFM?MDRFOI__ID=10714478&pc=MTA	2023826-2020-02494	2020-01-15	Injury	STAAR SUGICAL COMPANY	2020-10-21	MTA	IMPLANTABLE COLLAMER LENS (ICL)	Adverse Event Without Identified Device or Use Problem; No Apparent Adverse Event	Cataract; Insufficient Information	NA	NA	1	Event Description: IT WAS REPORTED THAT A LENS IS BEING RETURNED. THE REASON FOR RETURN IS UNKNOWN. ADDITIONAL INFORMATION HAS BEEN REQUESTED BUT NONE HAS BEEN FORTHCOMING. IF ADDITIONAL INFORMATION IS RECEIVED A SUPPLEMENTAL MEDWATCH REPORT WILL BE SUBMITTED. Manufacturer Narrative: ADDITIONAL INFORMATION: B5: THE REPORTER INDICATED THAT A 12.6MM, VICM5_12.6, -9.50 DIOPTER, IMPLANTABLE COLLAMER …	Lens Extraction + Secondary Operation	Resolved
https://www.accessdata.fda.gov/scripts/cdrh/cfdocs/cfMAUDE/Detail.CFM?MDRFOI__ID=12516827&pc=MTA	2023826-2021-03729	2018-06-20	Injury	STAAR SURGICAL COMPANY	2021-09-22	MTA	IMPLANTABLE COLLAMER LENS (ICL)	Off-Label Use; Adverse Event Without Identified Device or Use Problem	Cataract; Intraocular Pressure Increased	NA	NA	1	Event Description: THE REPORTER INDICATED THAT A 12.1MM, VICM5_12.1, -12.00 DIOPTER, IMPLANTABLE COLLAMER LENS WAS IMPLANTED INTO THE PATIENTS LEFT EYE (OS) ON (B)(6) 2018. ON (B)(6) 2021 THE LENS WAS EXPLANTED DUE TO ELEVATED IOP AND CATARACT. PHACO-EMULSIFICATION (CATARACT SURGERY) AND IOL IMPLANTATION WAS PERFORMED. PROBLEM RESOLVED. CAUSE OF EVENT WAS UNKNOWN. Manufacturer Narrative: H6- MEDI…	Lens Extraction + Secondary Operation	Resolved
https://www.accessdata.fda.gov/scripts/cdrh/cfdocs/cfMAUDE/Detail.CFM?MDRFOI__ID=11098622&pc=MTA	2023826-2020-03254	2020-12-04	Injury	STAAR SURGICAL COMPANY	2020-12-30	MTA	IMPLANTABLE COLLAMER LENS (ICL)	Misfocusing; Inadequacy of Device Shape and/or Size; Improper or Incorrect Procedure or Method	Cataract; Intraocular Pressure Increased; Blurred Vision	N/A	NA	1	Event Description: THE REPORTER INDICATED THAT THE SURGEON IMPLANTED A 13.2MM VICM5_13.2 IMPLANTABLE COLLAMER LENS, -3.5 DIOPTER INTO THE PATIENT'S RIGHT EYE (OD) ON (B)(6) 2020. THE SURGEON REPORTS EXCESSIVE VAULT, ELEVATED IOP, AND PUNTIFORM OPACITY IN THE POSTERIOR CAPSULE. THE CAUSE OF THE EVENT IS REPORTED AS USER ERROR: NON RECOMMENDED OVD AND EXCESSIVE USE OF OVD DUE TO A NON TOTAL DILATIO…	Lens Retention + Secondary Operation	Resolved
https://www.accessdata.fda.gov/scripts/cdrh/cfdocs/cfMAUDE/Detail.CFM?MDRFOI__ID=10669737&pc=MTA	2023826-2020-02329	2020-08-21	Injury	STAAR SURGICAL COMPANY	2020-10-13	MTA	IMPLANTABLE COLLAMER LENS (ICL)	Misfocusing; Inadequacy of Device Shape and/or Size; Optical Problem	Cataract; Intraocular Pressure Increased; Iritis; Blurred Vision; Visual Disturbances; Halo; Appropriate Clinical Signs, Symptoms, Conditions Term / Code Not Available	P030016	NA	1	Event Description: THE REPORTER INDICATED THE SURGEON IMPLANTED A 12.6MM MICL12.6 IMPLANTABLE COLLAMER LENS, -12.50 DIOPTER, IN THE PATIENTS RIGHT EYE (OD) ON (B)(6) 2020. THE LENS WAS EXPLANTED ON (B)(6) 2020 DUE TO INTRAOCULAR PRESSURE SPIKE (NOT CONTROLLABLE WITH DROPS) AND LENS WAS TOO LARGE, WHICH WAS CAUSING THE LENS TO BOW TOWARDS THE IRIS, INCREASING THE PRESSURE. THERE IS NO LENS IN THE …	Lens Extraction + Secondary Operation	Resolved
https://www.accessdata.fda.gov/scripts/cdrh/cfdocs/cfMAUDE/Detail.CFM?MDRFOI__ID=10669743&pc=MTA	2023826-2020-02328	2020-08-21	Injury	STAAR SURGICAL COMPANY	2020-10-13	MTA	IMPLANTABLE COLLAMER LENS (ICL)	Misfocusing; Inadequacy of Device Shape and/or Size; Optical Problem	Cataract; Intraocular Pressure Increased; Iritis; Blurred Vision; Visual Disturbances; Halo; Appropriate Clinical Signs, Symptoms, Conditions Term / Code Not Available	P030016	NA	1	Event Description: THE REPORTER INDICATED THE SURGEON IMPLANTED A 12.6MM MICL12.6 IMPLANTABLE COLLAMER LENS, -12.50 DIOPTER, IN THE PATIENTS LEFT EYE (OS) ON (B)(6) 2020. THE LENS WAS EXPLANTED ON (B)(6) 2020 DUE TO INTRAOCULAR PRESSURE SPIKE (NOT CONTROLLABLE WITH DROPS) AND LENS WAS TOO LARGE, WHICH WAS CAUSING THE LENS TO BOW TOWARDS THE IRIS, INCREASING THE PRESSURE . THERE IS NO LENS IN THE …	Lens Extraction + Secondary Operation	Resolved
https://www.accessdata.fda.gov/scripts/cdrh/cfdocs/cfMAUDE/Detail.CFM?MDRFOI__ID=7155887&pc=MTA	2023826-2017-01982	2017-09-12	Injury	STAAR SURGICAL COMPANY	2017-12-29	MTA	IMPLANTABLE COLLAMER LENS (ICL)	Device Operates Differently Than Expected; Adverse Event Without Identified Device or Use Problem	Cataract; Intraocular Pressure Increased; No Code Available	NA	NA	1	Event Description: THE REPORTER INDICATED THAT THE SURGEON IMPLANTED A 12.5MM ICM125V4, IMPLANTABLE COLLAMER LENS, -18.0 DIOPTER, ON (B)(6) 2015 IN THE PATIENT'S RIGHT EYE (OD). LENS OPACITY (ASCO) WAS OBSERVED ON (B)(6) 2017,ELEVATED INTRAOCULAR PRESSURE AND REFRACTIVE CHANGE OVERTIME DUE TO CATARACT WAS ALSO NOTICED. THE LENS WAS EXPLANTED ON (B)(6) 2017, PHACO-EMULSIFICATION (CATARACT SURGERY)…	Lens Extraction + Secondary Operation	Resolved
https://www.accessdata.fda.gov/scripts/cdrh/cfdocs/cfMAUDE/Detail.CFM?MDRFOI__ID=8772247&pc=MTA	2023826-2019-01176	2019-06-08	Injury	STAAR SURGICAL COMPANY	2019-07-09	MTA	IMPLANTABLE COLLAMER LENS (ICL)	Material Opacification; Inadequacy of Device Shape and/or Size; Adverse Event Without Identified Device or Use Problem	Cataract; Intraocular Pressure Increased; No Code Available	P030016	NA	1	Event Description: THE REPORTER INDICATED THAT A 13.2MM, MICL13.2, -8.0 DIOPTER, IMPLANTABLE COLLAMER LENS WAS IMPLANTED INTO THE PATIENT'S RIGHT EYE (OD) ON (B)(6) 2019. "DUE TO FLOPPY IRIS AND HIGH PRESSURE RESULTING IN ANGLE CLOSURE", THE LENS WAS REMOVED ON (B)(6) 2019. ADDITIONAL INFORMATION HAS BEEN REQUESTED BUT NONE HAS BEEN FORTHCOMING. IF ADDITIONAL INFORMATION IS RECEIVED A SUPPLEMENTA…	Lens Extraction	Not_Resolved
https://www.accessdata.fda.gov/scripts/cdrh/cfdocs/cfMAUDE/Detail.CFM?MDRFOI__ID=6859975&pc=MTA	2023826-2017-01422	2017-08-10	Injury	STAAR SURGICAL COMPANY	2017-09-12	MTA	IMPLANTABLE COLLAMER LENS (ICL)	Inadequacy of Device Shape and/or Size	Cataract; Intraocular Pressure Increased; Pupillary Block; No Code Available	P030016	NA	1	Event Description: THE REPORTER INDICATED THAT THE SURGEON IMPLANTED A MICL13.2, -12.0 DIOPTER, IMPLANTABLE COLLAMER LENS IN THE PATIENT'S RIGHT EYE (OD) ON (B)(6) 2017. ON (B)(6) 2017, THE LENS WAS EXPLANTED DUE TO EXCESSIVE VAULTING, (PUPILLARY BLOCK) ELEVATED IOP, NARROWING OF THE ANGLE, ANGLE CLOSURE, SHALLOWING OF THE ACD, ANTERIOR LENS OPACITY, WATER VACUOLES, AND FIXED DILATED PUPIL. THE L…	Lens Extraction + Secondary Operation	unknown
https://www.accessdata.fda.gov/scripts/cdrh/cfdocs/cfMAUDE/Detail.CFM?MDRFOI__ID=8233814&pc=MTA	2023826-2019-00072	2018-07-05	Injury	STAAR SURGICAL COMPANY	2019-01-10	MTA	IMPLANTABLE COLLAMER LENS (ICL)	Inadequacy of Device Shape and/or Size; Patient-Device Incompatibility; Device Dislodged or Dislocated; Adverse Event Without Identified Device or Use Problem; Optical Problem	Cataract; Intraocular Pressure Increased; Visual Disturbances; Halo; No Code Available	P030016	NA	1	Event Description: THE REPORTER INDICATED THE SURGEON IMPLANTED A 13.2MM MICL13.2 IMPLANTABLE COLLAMER LENS, -11.5 DIOPTER, IN THE PATIENTS RIGHT EYE (OD) ON (B)(6) 2018. THE LENS WAS EXPLANTED ON (B)(6) 2018 DUE TO PROBLEMS WITH PRESSURE. ADDITIONAL INFORMATION HAS BEEN REQUESTED BUT NONE HAS BEEN FORTHCOMING. IF ADDITIONAL INFORMATION IS RECEIVED, A SUPPLEMENTAL MEDWATCH WILL BE SUBMITTED. Manu…	Lens Extraction	unknown
https://www.accessdata.fda.gov/scripts/cdrh/cfdocs/cfMAUDE/Detail.CFM?MDRFOI__ID=8233815&pc=MTA	2023826-2019-00071	2018-07-18	Injury	STAAR SURGICAL COMPANY	2019-01-10	MTA	IMPLANTABLE COLLAMER LENS (ICL)	Inadequacy of Device Shape and/or Size; Patient-Device Incompatibility; Device Dislodged or Dislocated; Adverse Event Without Identified Device or Use Problem; Optical Problem	Cataract; Intraocular Pressure Increased; Visual Disturbances; Halo; No Code Available	P030016	NA	1	Event Description: THE REPORTER INDICATED THE SURGEON IMPLANTED A 13.7MM MICL13.7 IMPLANTABLE COLLAMER LENS, -11.5 DIOPTER, IN THE PATIENTS LEFT EYE (OS) ON (B)(6) 2018. THE LENS WAS EXPLANTED ON (B)(6) 2018 DUE TO PROBLEMS WITH PRESSURE. ADDITIONAL INFORMATION HAS BEEN REQUESTED BUT NONE HAS BEEN FORTHCOMING. IF ADDITIONAL INFORMATION IS RECEIVED, A SUPPLEMENTAL MEDWATCH WILL BE SUBMITTED. Manuf…	Lens Extraction + Secondary Operation	unknown
https://www.accessdata.fda.gov/scripts/cdrh/cfdocs/cfMAUDE/Detail.CFM?MDRFOI__ID=6024717&pc=MTA	2023826-2016-01448	NA	Injury	STAAR SURGICAL COMPANY	2016-10-12	MTA	ICL (IMPLANTABLE COLLAMER LENS)	Inadequacy of Device Shape and/or Size; Appropriate Term/Code Not Available	Cataract; Intraocular Pressure, Delayed, Uncontrolled; Pain; Blurred Vision; No Code Available	P030016	NA	1	Event Description: THE REPORTER STATED THE SURGEON IMPLANTED A 13.2MM MICL13.2 IMPLANTABLE COLLAMER LENS, -10.0 DIOPTER, IN THE PATIENT'S EYE. THE LENS WAS EXPLANTED DUE TO PRESSURE AND PAIN FOR PATIENT. ADDITIONAL INFORMATION HAS BEEN REQUESTED BUT NONE HAS BEEN FORTHCOMING. IF ADDITIONAL INFORMATION IS RECEIVED, A SUPPLEMENTAL MEDWATCH REPORT WILL BE SUBMITTED. Manufacturer Narrative: ADDITIONA…	Lens Extraction	unknown
https://www.accessdata.fda.gov/scripts/cdrh/cfdocs/cfMAUDE/Detail.CFM?MDRFOI__ID=6291699&pc=MTA	2023826-2017-00197	NA	Injury	STAAR SURGICAL COMPANY AG	2017-01-31	MTA	ICL (IMPLANTABLE COLLAMER LENS)	Adverse Event Without Identified Device or Use Problem	Cataract; Loss of Vision	P030016	NA	1	Event Description: THE PATIENT REPORTED THE SURGEON IMPLANTED A MICL12.6 IMPLANTABLE COLLAMER LENS, -4.0 DIOPTER, IN THE LEFT EYE (OS). THE PATIENT REPORTED HAD LOST VISION DUE TO THE DEVELOPMENT OF A CATARACT. ADDITIONAL INFORMATION HAS BEEN REQUESTED BUT NONE HAS BEEN FORTHCOMING. IF ADDITIONAL INFORMATION IS RECEIVED, A SUPPLEMENTAL MEDWATCH REPORT WILL BE SUBMITTED. Manufacturer Narrative: (B…	unknown	unknown
https://www.accessdata.fda.gov/scripts/cdrh/cfdocs/cfMAUDE/Detail.CFM?MDRFOI__ID=6291665&pc=MTA	2023826-2017-00196	NA	Injury	STAAR SURGICAL COMPANY AG	2017-01-31	MTA	ICL (IMPLANTABLE COLLAMER LENS)	Adverse Event Without Identified Device or Use Problem; Missing Value Reason	Cataract; Loss of Vision	P030016	NA	1	Event Description: THE PATIENT REPORTED THE SURGEON IMPLANTED A MICL12.6 IMPLANTABLE COLLAMER LENS, -4.0 DIOPTER, IN THE RIGHT EYE (OD). THE PATIENT REPORTED HAD LOST VISION DUE TO THE DEVELOPMENT OF A CATARACT. ADDITIONAL INFORMATION HAS BEEN REQUESTED BUT NONE HAS BEEN FORTHCOMING. IF ADDITIONAL INFORMATION IS RECEIVED, A SUPPLEMENTAL MEDWATCH REPORT WILL BE SUBMITTED. Manufacturer Narrative: C…	unknown	unknown
https://www.accessdata.fda.gov/scripts/cdrh/cfdocs/cfMAUDE/Detail.CFM?MDRFOI__ID=6358993&pc=MTA	2023826-2017-00252	2015-09-16	Injury	STAAR SURGICAL COMPANY	2017-02-24	MTA	IMPLANTABLE COLLAMER LENS (ICL)	Adverse Event Without Identified Device or Use Problem	Cataract; Loss of Vision; No Code Available	P030016	NA	1	Event Description: THE PATIENT REPORTED THE SURGEON IMPLANTED A 12.6MM MICL12.6 IMPLANTABLE COLLAMER LENS, -11.0 DIOPTER, IN HIS LEFT EYE (OS). THE PATIENT REPORTED HAD LOST VISION DUE TO THE DEVELOPMENT OF A CATARACT. THE LENS WAS EXPLANTED AND REPLACED. THE LENS WAS IMPLANTED ON (B)(6) 2011. THE FACILITY REPORTED THEY CONFIRMED THE PATIENTS REPORT. THE DATE OF CATARACT DIAGNOSIS WAS (B)(6) 2015…	Lens Extraction + Secondary Operation	Resolved
https://www.accessdata.fda.gov/scripts/cdrh/cfdocs/cfMAUDE/Detail.CFM?MDRFOI__ID=6408305&pc=MTA	2023826-2017-00414	2016-02-29	Injury	STAAR SURGICAL COMPANY	2017-03-15	MTA	IMPLANTABLE COLLAMER LENS (ICL)	Adverse Event Without Identified Device or Use Problem	Cataract; Loss of Vision; No Code Available	P030016	NA	1	Event Description: THE PATIENT REPORTED THE SURGEON IMPLANTED A 12.6MM MICL12.6 IMPLANTABLE COLLAMER LENS, -11.0 DIOPTER, IN HER RIGHT EYE (OD). THE PATIENT REPORTED HAD LOST VISION DUE TO THE DEVELOPMENT OF A CATARACT. THE LENS WAS EXPLANTED, CATARACT SURGERY WAS PERFORMED AND AN IOL WAS IMPLANTED. THE LENS WAS IMPLANTED ON (B)(6) 2013. THE FACILITY REPORTED THE DATE OF CATARACT DIAGNOSIS WAS (B…	Lens Extraction + Secondary Operation	Resolved
https://www.accessdata.fda.gov/scripts/cdrh/cfdocs/cfMAUDE/Detail.CFM?MDRFOI__ID=4601777&pc=MTA	2023826-2015-00318	NA	Injury	STAAR SURGICAL COMPANY	2015-03-13	MTA	ICL (IMPLANTABLE COLLAMER LENS)	Appropriate Term/Code Not Available	Cataract; Loss of Vision; No Code Available	P030016	NA	1	Event Description: THE PATIENT REPORTED THE SURGEON IMPLANTED A 12.6MM MICL12.6 IMPLANTABLE COLLAMER LENS IN HIS LEFT EYE (OS). THE PATIENT REPORTED HAD LOST VISION DUE TO THE DEVELOPMENT OF A CATARACT AND THE LENS WAS EXPLANTED. THE LENS WAS IMPLANTED ON (B)(6) 2013. ADDITIONAL INFORMATION HAS BEEN REQUESTED BUT NONE HAS BEEN FORTHCOMING. IF ADDITIONAL INFORMATION IS RECEIVED, A SUPPLEMENTAL MED…	Lens Extraction + Secondary Operation	unknown
https://www.accessdata.fda.gov/scripts/cdrh/cfdocs/cfMAUDE/Detail.CFM?MDRFOI__ID=12215415&pc=MTA	2023826-2021-02797	2021-02-25	Injury	STAAR SURGICAL COMPANY	2021-07-22	MTA	IMPLANTABLE COLLAMER LENS	Adverse Event Without Identified Device or Use Problem	Cataract; No Clinical Signs, Symptoms or Conditions	P030016	NA	1	Event Description: THE REPORTER STATES A 13.2MM MICL13.2 IMPLANTABLE COLLAMER LENS -16.0 DIOPTER WAS IMPLANTED INTO THE PATIENT'S LEFT (OS) EYE. REPORTEDLY ON (B)(6) 2021 THE LENS WAS EXPLANTED. ATTEMPTS TO OBTAIN ADDITIONAL INFORMATION HAVE NOT BEEN SUCCESSFUL. Manufacturer Narrative: B5-ADDITIONAL INFORMATION: THE INITIAL LENS WAS IMPLANTED (B)(6) 2016. ON (B)(6) 2021 LENS OPACITY PSC/NS WAS OB…	Lens Extraction + Secondary Operation	unknown
https://www.accessdata.fda.gov/scripts/cdrh/cfdocs/cfMAUDE/Detail.CFM?MDRFOI__ID=17722429&pc=MTA	2023826-2023-03743	2023-07-03	Injury	STAAR SURGICAL COMPANY	2023-09-11	MTA	IMPLANTABLE COLLAMER LENS (ICL)	Adverse Event Without Identified Device or Use Problem	Cataract; No Clinical Signs, Symptoms or Conditions	P030016	NA	1	Event Description: THE REPORTER INDICATED THAT THE SURGEON IMPLANTED A 12.6MM VICM512.6, -02.00 DIOPTER, IMPLANTABLE COLLAMER LENS INTO THE PATIENT'S LEFT EYE (OS) ON (B)(6) 2023. THE LENS WAS EXPLANTED ON (B)(6) 2023 DUE TO LENS OPACITY(CATARACT) ASC OBSERVED ON (B)(6) 2023. THIS RESOLVED THE PROBLEM. CAUSE OF THE EVENT IS REPORTED AS UNKNOWN. REPORTEDLY, THE PATIENT IS HAPPY. Manufacturer Narra…	Lens Extraction + Secondary Operation	Resolved
https://www.accessdata.fda.gov/scripts/cdrh/cfdocs/cfMAUDE/Detail.CFM?MDRFOI__ID=10505351&pc=MTA	2023826-2020-02057	2020-08-10	Injury	STAAR SURGICAL COMPANY	2020-09-08	MTA	IMPLANTABLE COLLAMER LENS (ICL)	Inadequacy of Device Shape and/or Size	Cataract; No Clinical Signs, Symptoms or Conditions	NA#S-P#NA	NA	1	Event Description: THE REPORTER INDICATED THAT A 12.6MM, VICM5_12.6, -10.5 DIOPTER, IMPLANTABLE COLLAMER LENS WAS IMPLANTED INTO THE PATIENTS RIGHT EYE (OD) ON (B)(6) 2020. LOW VAULT WAS OBSERVED, LENS REMAINS IMPLANTED. DEVICE ( LENS TOO SMALL) WAS REPORTED TO BE THE CAUSE OF THIS EVENT. THE REPORTER STATED " LENS IS TOO CLOSE TO NATURAL LENS NOT SITTING CORRECTLY." LENS EXCHANGE IS PLANNED BUT …	Lens Retention	Not_Resolved
https://www.accessdata.fda.gov/scripts/cdrh/cfdocs/cfMAUDE/Detail.CFM?MDRFOI__ID=10505372&pc=MTA	2023826-2020-02056	2020-08-10	Injury	STAAR SURGICAL COMPANY	2020-09-08	MTA	IMPLANTABLE COLLAMER LENS (ICL)	Inadequacy of Device Shape and/or Size	Cataract; No Clinical Signs, Symptoms or Conditions	NA#S-P#NA	NA	1	Event Description: THE REPORTER INDICATED THAT A 12.6MM, VICM5_12.6, -10.5 DIOPTER, IMPLANTABLE COLLAMER LENS WAS IMPLANTED INTO THE PATIENTS LEFT EYE (OS) ON (B)(6) 2020. LOW VAULT WAS OBSERVED, LENS REMAINS IMPLANTED. DEVICE ( LENS TOO SMALL) WAS REPORTED TO BE THE CAUSE OF THIS EVENT. THE REPORTER STATED " LENS IS TOO CLOSE TO NATURAL LENS NOT SITTING CORRECTLY." LENS EXCHANGE IS PLANNED BUT N…	Lens Retention	Not_Resolved
https://www.accessdata.fda.gov/scripts/cdrh/cfdocs/cfMAUDE/Detail.CFM?MDRFOI__ID=18062446&pc=MTA	2023826-2023-04853	2023-09-07	Injury	STAAR SURGICAL COMPANY	2023-11-02	MTA	IMPLANTABLE COLLAMER LENS (ICL)	Inadequacy of Device Shape and/or Size	Cataract; No Clinical Signs, Symptoms or Conditions	P030016	NA	1	Event Description: THE REPORTER INDICATED THAT A 12.1MM VICM512.1 IMPLANTABLE COLLAMER LENS OF -13.0 DIOPTER WAS IMPLANTED INTO THE PATIENT'S RIGHT EYE (OD) ON (B)(6) 2019. ON (B)(6) 2023, THE LENS WAS EXCHANGED FOR A LONGER LENGTH LENS DUE TO LOW VAULT AND LENS OPACITY ASC THAT WAS OBSERVED ON (B)(6) 2023. THE PROBLEM WAS RESOLVED. THE CAUSE OF THE EVENT IS UNKNOWN. Manufacturer Narrative: A4-A6…	Lens Exchange	Resolved
https://www.accessdata.fda.gov/scripts/cdrh/cfdocs/cfMAUDE/Detail.CFM?MDRFOI__ID=12222347&pc=MTA	2023826-2021-02864	2021-04-29	Injury	STAAR SURGICAL COMPANY	2021-07-23	MTA	IMPLANTABLE COLLAMER LENS (ICL)	Inadequacy of Device Shape and/or Size; No Apparent Adverse Event	Cataract; No Clinical Signs, Symptoms or Conditions	P030016	NA	1	Event Description: THE REPORTER STATED THAT A 12.1MM, MICL12.1, -12.00 DIOPTER, IMPLANTABLE COLLAMER LENS WAS IMPLANTED INTO THE PATIENTS LEFT EYE (OS) ON (B)(6) 2020. ON (B)(6) 2021 THE LENS WAS EXCHANGED FOR A LONGER LENGTH LENS DUE TO LOW VAULT AND LENS OPACITY (ASC, OBSERVED: (B)(6) 2021). "ANTERIOR SUBCAPSULAR CATARACT FORMATION TO EDGE OF VISUAL AXIS" WAS REPORTED. IT WAS REPORTED THAT THE …	Lens Exchange	unknown
https://www.accessdata.fda.gov/scripts/cdrh/cfdocs/cfMAUDE/Detail.CFM?MDRFOI__ID=12222348&pc=MTA	2023826-2021-02865	2021-04-29	Injury	STAAR SURGICAL COMPANY	2021-07-23	MTA	IMPLANTABLE COLLAMER LENS (ICL)	Inadequacy of Device Shape and/or Size; No Apparent Adverse Event	Cataract; No Clinical Signs, Symptoms or Conditions	P030016	NA	1	Event Description: THE REPORTER STATED THAT A 12.1MM,MICL12.1, -10.50 DIOPTER, IMPLANTABLE COLLAMER LENS WAS IMPLANTED INTO THE PATIENTS RIGHT EYE (OD) ON (B)(6) 2020. IT WAS REPORTED THAT AN ICL EXCHANGED IS SCHEDULED FOR THE PATIENT, CAUSE IS UNKNOWN. IF ADDITIONAL INFORMATION IS RECEIVED A SUPPLEMENTAL MEDWATCH REPORT WILL BE SUBMITTED.Event Description: THE REPORTER STATED THAT A 12.1MM, MICL…	Lens Exchange	Resolved
https://www.accessdata.fda.gov/scripts/cdrh/cfdocs/cfMAUDE/Detail.CFM?MDRFOI__ID=11012227&pc=MTA	2023826-2020-03022	2020-10-15	Injury	STAAR SURGICAL COMPANY AG	2020-12-15	MTA	IMPLANTABLE COLLAMER LENS (ICL)	Material Opacification; Adverse Event Without Identified Device or Use Problem	Cataract; No Clinical Signs, Symptoms or Conditions	N/A	NA	1	Event Description: THE REPORTER INDICATED THAT A 12.0MM, ICM120V4, -17.0 DIOPTER, IMPLANTABLE COLLAMER LENS WAS IMPLANTED INTO THE PATIENT'S LEFT EYE (OS) IN 2003. LENS OPACITY (ASC WAS OBSERVED ON 15/OCT/2020. LENS REMAINS IMPLANTED. CAUSE OF THE EVENT IS REPORTED AS UNKNOWN. IF ADDITIONAL INFORMATION IS RECEIVED, A SUPPLEMENTAL MEDWATCH REPORT WILL BE SUBMITTED. Manufacturer Narrative: B5: THE …	Lens Exchange	Resolved
https://www.accessdata.fda.gov/scripts/cdrh/cfdocs/cfMAUDE/Detail.CFM?MDRFOI__ID=18271733&pc=MTA	2023826-2023-05506	NA	Injury	STAAR SURGICAL COMPANY	2023-12-05 05:00:00	MTA	IMPLANTABLE COLLAMER LENS (ICL)	Off-Label Use; Adverse Event Without Identified Device or Use Problem	Cataract; No Clinical Signs, Symptoms or Conditions	P030016	NA	1	Event Description: THE REPORTER INDICATED THAT AN IMPLANTABLE COLLAMER LENS WAS IMPLANTED INTO THE PATIENT'S EYE. A PLANNED LENS REMOVAL AND REPLACMENT WAS REPORTED, LENS REMAINS IMPLANTED. ATTEMPTS TO OBTAIN ADDITIONAL INFORMATION HAVE NOT BEEN SUCCESSFUL. IF ADDITIONAL INFORMATION IS RECEIVED A SUPPLEMENTAL MEDWATCH REPORT WILL BE SUBMITTED. Manufacturer Narrative: CLAIM#: (B)(4).	Lens Extraction + Secondary Operation	Resolved
https://www.accessdata.fda.gov/scripts/cdrh/cfdocs/cfMAUDE/Detail.CFM?MDRFOI__ID=8354764&pc=MTA	2023826-2019-00272	2013-07-10	Injury	STAAR SURGICAL COMPANY AG	2019-02-20	MTA	IMPLANTABLE COLLAMER LENS (ICL)	Adverse Event Without Identified Device or Use Problem	Cataract; No Code Available	P030016	NA	1	Event Description: THE REPORTER INDICATED THAT THE SURGEON IMPLANTED A 12.1MM MICL 12.1, -13.0 DIOPTER, IMPLANTABLE COLLAMER LENS INTO THE PATIENTS RIGHT EYE (OD) ON (B)(6) 2013. THE LENS WAS REMOVED AND EXCHANGED ON (B)(6) 2019 DUE TO LENS OPACITY, CORTICAL, BEING OBSERVED (B)(6) 2018. IT WAS REPORTED THE LENS WAS REMOVED TO PREVENT THE PROGRESSION THE CORTICAL CATARACT. CAUSE OF THE EVENT IS RE…	Lens Extraction	unknown
https://www.accessdata.fda.gov/scripts/cdrh/cfdocs/cfMAUDE/Detail.CFM?MDRFOI__ID=8354778&pc=MTA	2023826-2019-00273	2013-07-25	Injury	STAAR SURGICAL COMPANY AG	2019-02-20	MTA	IMPLANTABLE COLLAMER LENS (ICL)	Adverse Event Without Identified Device or Use Problem	Cataract; No Code Available	P030016	NA	1	Event Description: THE REPORTER INDICATED THAT THE SURGEON IMPLANTED A 12.1MM MICL12.1, -13.5 DIOPTER, IMPLANTABLE COLLAMER LENS INTO THE PATIENTS LEFT EYE (OS) ON (B)(6) 2013. IT WAS REPORTED THAT PATIENT IS DEVELOPING EARLY CORTICAL CATARACTS AND THE ICL WILL BE REMOVED AND EXCHANGED. LENS REMAINS IMPLANTED. ADDITIONAL INFORMATION HAS BEEN REQUESTED BUT NONE HAS BEEN FORTHCOMING. IF ADDITIONAL …	Lens Exchange	unknown
https://www.accessdata.fda.gov/scripts/cdrh/cfdocs/cfMAUDE/Detail.CFM?MDRFOI__ID=6153415&pc=MTA	2023826-2016-01727	2016-11-07	Injury	STAAR SURGICAL COMPANY	2016-12-07	MTA	ICL (IMPLANTABLE COLLAMER LENS)	Adverse Event Without Identified Device or Use Problem	Cataract; No Code Available	P030016	NA	1	Event Description: THE REPORTER STATED THE SURGEON IMPLANTED A 13.2MM MICL13.2 IMPLANTABLE COLLAMER LENS, -9.5 DIOPTER, IN THE PATIENT'S LEFT EYE (OS) ON (B)(6) 2016. AS THE SURGEON WAS IMPLANTING THE LENS, THE PATIENT TURNED AND THE TIP OF THE SFC-45 FP CARTRIDGE TORE THE ANTERIOR CAPSULE. A CATARACT DEVELOPED AND THE LENS WAS EXPLANTED ON (B)(6) 2016. CATARACT SURGERY WAS PERFORMED. Manufacture…	Lens Extraction + Secondary Operation	unknown
https://www.accessdata.fda.gov/scripts/cdrh/cfdocs/cfMAUDE/Detail.CFM?MDRFOI__ID=6560729&pc=MTA	2023826-2017-00806	2017-04-06	Injury	STAAR SURGICAL COMPANY	2017-05-11	MTA	IMPLANTABLE COLLAMER LENS (ICL)	Adverse Event Without Identified Device or Use Problem	Cataract; No Code Available	P030016	NA	1	Event Description: THE REPORTER INDICATED THE SURGEON INSERTED A 12.6MM MICL12.6 IMPLANTABLE COLLAMER LENS, -12.5 DIOPTER, IN THE PATIENT'S LEFT EYE (OS) AND THE SURGEON NOTED A CATARACT. THE LENS WAS CUT TO REMOVE WITHIN THE SAME SURGERY, WITH NO PATIENT INJURY. CATARACT SURGERY WAS PERFORMED AND AN IOL WAS IMPLANTED. A SUTURE WAS REQUIRED. THE PATIENT'S POST-OP UCVA WAS 20/30. THE REPORTER STAT…	Lens Extraction + Secondary Operation	unknown
https://www.accessdata.fda.gov/scripts/cdrh/cfdocs/cfMAUDE/Detail.CFM?MDRFOI__ID=7207877&pc=MTA	2023826-2018-00107	2017-12-19	Injury	STAAR SURGICAL COMPANY AG	2018-01-19	MTA	IMPLANTABLE COLLAMER LENS (ICL)	Adverse Event Without Identified Device or Use Problem	Cataract; No Code Available	P030016	NA	1	Event Description: THE REPORTER INDICATED THAT THE SURGEON IMPLANTED A MICL12.1, -13.0 DIOPTER, IMPLANTABLE COLLAMER LENS IN THE PATIENTS RIGHT EYE (OD) ON (B)(6) 2009. ON (B)(6) 2017, THE LENS WAS REMOVED BECAUSE THE PATIENT DEVELOPED A CATARACT. CATARACT REMOVAL WAS PERFORMED AT THE SAME TIME OF ICL REMOVAL AND A MX60 ( BAUSCH + LOMB) INTRAOCULAR LENS WAS IMPLANTED. IT IS REPORTED THAT INCIDENT…	Lens Extraction + Secondary Operation	Resolved
https://www.accessdata.fda.gov/scripts/cdrh/cfdocs/cfMAUDE/Detail.CFM?MDRFOI__ID=7288989&pc=MTA	2023826-2018-00264	2018-01-16	Injury	STAAR SURGICAL COMPANY	2018-02-22	MTA	IMPLANTABLE COLLAMER LENS (ICL)	Adverse Event Without Identified Device or Use Problem	Cataract; No Code Available	P030016	NA	1	Event Description: THE REPORTER INDICATED THAT THE SURGEON EXPLANTED A MICL13.2, -11.5 DIOPTER, IMPLANTABLE COLLAMER LENS FROM THE PATIENTS RIGHT EYE (OD) ON (B)(6) 2018. THE LENS WAS REMOVED DUE TO A CATARACT. CATARACT SURGERY WAS PERFORMED AT THE SAME TIME OF ICL REMOVAL AND A SYMFONY (AMO) INTRAOCULAR LENS WAS IMPLANTED. IT IS REPORTED THAT THE CAUSE OF EVENT WAS NOT PRODUCT RELATED, THERE WAS…	Lens Extraction + Secondary Operation	Resolved
https://www.accessdata.fda.gov/scripts/cdrh/cfdocs/cfMAUDE/Detail.CFM?MDRFOI__ID=8274513&pc=MTA	2023826-2019-00158	2018-05-10	Injury	STAAR SURGICAL COMPANY AG	2019-01-24	MTA	IMPLANTABLE COLLAMER LENS (ICL)	Adverse Event Without Identified Device or Use Problem	Cataract; No Code Available	NA	NA	1	Event Description: THE REPORTER INDICATED THE SURGEON IMPLANTED A 12.0MM ICM120V4 IMPLANTABLE COLLAMER LENS, -14.0 DIOPTER, IN THE PATIENT'S LEFT EYE (OS) ON (B)(6) 2011. THE LENS WAS EXPLANTED ON (B)(6) 2018 DUE TO LENS OPACITY (ANTERIOR SUBCAPSULAR/NUCLEAR SCLEROTIC/CORTICAL). PHACO-EMULSIFICATION (CATARACT SURGERY) WAS PERFORMED AND AN IOL WAS IMPLANTED. Manufacturer Narrative: ADDITIONAL DATA…	Lens Extraction + Secondary Operation	unknown
https://www.accessdata.fda.gov/scripts/cdrh/cfdocs/cfMAUDE/Detail.CFM?MDRFOI__ID=8210581&pc=MTA	2023826-2019-00012	2018-11-01	Injury	STAAR SURGICAL COMPANY	2019-01-02	MTA	IMPLANTABLE COLLAMER LENS (ICL)	Adverse Event Without Identified Device or Use Problem	Cataract; No Code Available	N/A	NA	1	Event Description: THE REPORTER INDICATED THAT A 12.1MM, VICM5_12.1, -6.50 DIOPTER, IMPLANTABLE COLLAMER LENS WAS IMPLANTED INTO THE PATIENT'S LEFT EYE (OS) ON (B)(6) 2018. ON (B)(6) 2018 LENS OPACITY (ASC) WAS OBSERVED AND THE LENS WAS REMOVED ON 15 NOV 2018. IT WAS REPORTED THAT BECAUSE THE PATIENT IS RELATIVELY OLD AND OPACITY OF THE LENS IS MILD, THE PATIENT IS BEING CORRECTED WITH GLASSES. M…	Lens Extraction	unknown
https://www.accessdata.fda.gov/scripts/cdrh/cfdocs/cfMAUDE/Detail.CFM?MDRFOI__ID=8210647&pc=MTA	2023826-2019-00011	2018-11-01	Injury	STAAR SURGICAL COMPANY	2019-01-02	MTA	IMPLANTABLE COLLAMER LENS (ICL)	Adverse Event Without Identified Device or Use Problem	Cataract; No Code Available	N/A	NA	1	Event Description: THE REPORTER INDICATED THAT A 12.1MM, VICM5_12.1, -4.50 DIOPTER, IMPLANTABLE COLLAMER LENS WAS IMPLANTED INTO THE PATIENT'S RIGHT EYE (OD) ON (B)(6) 2018. ON (B)(6) 2018 LENS OPACITY (ASC) WAS OBSERVED AND THE LENS WAS REMOVED ON (B)(6) 2018. IT WAS REPORTED THAT BECAUSE THE PATIENT IS RELATIVELY OLD AND OPACITY OF THE LENS IS MILD, THE PATIENT IS BEING CORRECTED WITH GLASSES. …	Lens Extraction	unknown
https://www.accessdata.fda.gov/scripts/cdrh/cfdocs/cfMAUDE/Detail.CFM?MDRFOI__ID=8795471&pc=MTA	2023826-2019-01236	2019-01-03	Injury	STAAR SURGICAL COMPANY	2019-07-16	MTA	IMPLANTABLE COLLAMER LENS (ICL)	Adverse Event Without Identified Device or Use Problem	Cataract; No Code Available	P030016	NA	1	Event Description: THE REPORTER INDICATED THAT AN IMPLANTABLE COLLAMER LENS WAS EXPLANTED FROM THE RIGHT (OD) EYE ON (B)(6) 2019 DUE TO AN ANTERIOR SUBCAPSULAR CATARACT. THE SURGERY IS REPORTED TO HAVE BEEN SUCCESSFUL. ATTEMPTS TO OBTAIN ADDITIONAL INFORMATION HAVE NOT BEEN SUCCESSFUL. Manufacturer Narrative: DEVICE EVALUATION: THE LENS WAS RETURNED DRY, IN CONTACT LENS CONTAINER WITH CLEAR SURGI…	Lens Extraction + Secondary Operation	Resolved
https://www.accessdata.fda.gov/scripts/cdrh/cfdocs/cfMAUDE/Detail.CFM?MDRFOI__ID=8528238&pc=MTA	2023826-2019-00631	2019-02-11	Injury	STAAR SURGICAL COMPANY	2019-04-18	MTA	IMPLANTABLE COLLAMER LENS (ICL)	Adverse Event Without Identified Device or Use Problem	Cataract; No Code Available	N/A	NA	1	Event Description: THE REPORTER INDICATED THAT A 13.2MM, VICM5_13.2, -7.00 DIOPTER, IMPLANTABLE COLLAMER LENS INTO THE PATIENTS RIGHT EYE (OD) ON (B)(6) 2019. THE LENS WAS EXPLANTED ON THE SAME DAY IN A DIFFERENT SURGERY DUE TO LENS OPACITY (ASC). THE REPORTER STATED " THE DOCTOR NOTED THE OPACITY AFTER IMPLANTATION. THE OPACITY IS MORE RESOLVED THAN BEFORE, IT WAS A LITTLE IMPROVED AFTER BEING T…	Lens Extraction	Resolved
https://www.accessdata.fda.gov/scripts/cdrh/cfdocs/cfMAUDE/Detail.CFM?MDRFOI__ID=8736590&pc=MTA	2023826-2019-01119	2019-05-29	Injury	STAAR SURGICAL COMPANY	2019-06-26	MTA	IMPLANTABLE COLLAMER LENS	Adverse Event Without Identified Device or Use Problem	Cataract; No Code Available	NA	NA	1	Event Description: THE REPORTER INDICATED THAT THE SURGEON IMPLANTED A 12.1MM VICM5_12.1 IMPLANTABLE COLLAMER LENS, -6.0 DIOPTER, INTO THE PATIENT'S LEFT (OS) EYE ON (B)(6) 2019. ON (B)(6) 2019, THE LENS WAS EXPLANTED AND THE SURGEON PERFORMED PHACO-EMULSIFICATION AND AN IOL WAS IMPLANTED. THE SURGEON REPORTS LENS OPACITY-CORTICAL. THE CAUSE OF THE EVENT IS LISTED AS UNKNOWN. Manufacturer Narrati…	Lens Extraction + Secondary Operation	unknown
https://www.accessdata.fda.gov/scripts/cdrh/cfdocs/cfMAUDE/Detail.CFM?MDRFOI__ID=9276016&pc=MTA	2023826-2019-02092	2019-09-19	Injury	STAAR SURGICAL COMPANY AG	2019-11-04	MTA	IMPLANTABLE COLLAMER LENS (ICL)	Adverse Event Without Identified Device or Use Problem	Cataract; No Code Available	P030016	NA	1	Event Description: THE REPORTER INDICATED THE SURGEON IMPLANTED A 12.6MM MICL12.6 IMPLANTABLE COLLAMER LENS, -11.5 DIOPTER, IN THE PATIENTS RIGHT EYE (OD) ON (B)(6) 2007. THE LENS WAS EXPLANTED DUE TO DEVELOPMENT OF A CATARACT. ADDITIONAL INFORMATION HAS BEEN REQUESTED BUT NONE HAS BEEN FORTHCOMING. IF ADDITIONAL INFORMATION IS RECEIVED, A SUPPLEMENTAL MEDWATCH WILL BE SUBMITTED. Manufacturer Nar…	Lens Extraction + Secondary Operation	Resolved
https://www.accessdata.fda.gov/scripts/cdrh/cfdocs/cfMAUDE/Detail.CFM?MDRFOI__ID=9276024&pc=MTA	2023826-2019-02093	2019-09-19	Injury	STAAR SURGICAL COMPANY AG	2019-11-04	MTA	IMPLANTABLE COLLAMER LENS (ICL)	Adverse Event Without Identified Device or Use Problem	Cataract; No Code Available	P030016	NA	1	Event Description: THE REPORTER INDICATED THE SURGEON IMPLANTED A 12.6MM MICL12.6 IMPLANTABLE COLLAMER LENS, -11.5 DIOPTER, IN THE PATIENTS LEFT EYE (OS) ON (B)(6) 2007. THE LENS WAS EXPLANTED DUE TO DEVELOPMENT OF A CATARACT. ADDITIONAL INFORMATION HAS BEEN REQUESTED BUT NONE HAS BEEN FORTHCOMING. IF ADDITIONAL INFORMATION IS RECEIVED, A SUPPLEMENTAL MEDWATCH WILL BE SUBMITTED. Manufacturer Narr…	Lens Extraction + Secondary Operation	Resolved
https://www.accessdata.fda.gov/scripts/cdrh/cfdocs/cfMAUDE/Detail.CFM?MDRFOI__ID=9441175&pc=MTA	2023826-2019-02347	NA	Injury	STAAR SURGICAL COMPANY	2019-12-09	MTA	IMPLANTABLE COLLAMER LENS (ICL)	Adverse Event Without Identified Device or Use Problem	Cataract; No Code Available	P030016	NA	1	Event Description: THE REPORTER INDICATED THAT THE SURGEON IMPLANTED A 13.2MM MICL13.2 IMPLANTABLE COLLAMER LENS, -11.5 DIOPTER, INTO THE PATIENT'S RIGHT (OD) EYE ON (B)(6) 2013. REPORTEDLY, THE PATIENT DEVELOPED A CATARACT. THE LENS WAS EXPLANTED AND CATARACT SURGERY WAS PERFORMED. AN IOL FROM ANOTHER MANUFACTURER WAS IMPLANTED ON (B)(6) 2019. ATTEMPTS TO OBTAIN ADDITIONAL INFORMATION HAVE NOT B…	Lens Extraction + Secondary Operation	unknown
https://www.accessdata.fda.gov/scripts/cdrh/cfdocs/cfMAUDE/Detail.CFM?MDRFOI__ID=10140605&pc=MTA	2023826-2020-01204	NA	Injury	STAAR SURGICAL COMPANY	2020-06-10 04:00:00	MTA	IMPLANTABLE COLLAMER LENS (ICL)	Adverse Event Without Identified Device or Use Problem	Cataract; No Code Available	NA	NA	1	Event Description: THE REPORTER INDICATED THAT THE SURGEON IMPLANTED A 13.2MM VICM5_13.2 IMPLANTABLE COLLAMER LENS, -13.0 DIOPTER, INTO THE PATIENT'S RIGHT EYE (OD) ON (B)(6) 2018. ON (B)(6) 2019 THE LENS WAS EXPLANTED DUE TO LENS OPACITY NS, DATE ASSESSED (B)(6) 2019. PHACO-EMULSIFICATION (CATARACT SURGERY) AND IOL IMPLANTATION WAS PERFORMED. THE CAUSE OF THE EVENT IS REPORTED AS UNKNOWN. Manufa…	Lens Extraction + Secondary Operation	Resolved
https://www.accessdata.fda.gov/scripts/cdrh/cfdocs/cfMAUDE/Detail.CFM?MDRFOI__ID=9703060&pc=MTA	2023826-2020-00268	NA	Injury	STAAR SURGICAL COMPANY AG	2020-02-12 05:00:00	MTA	IMPLANTABLE COLLAMER LENS (ICL)	Adverse Event Without Identified Device or Use Problem	Cataract; No Code Available	P030016	NA	1	Event Description: THE REPORTER INDICATED THE SURGEON IMPLANTED A 12.6MM MICL12.6 IMPLANTABLE COLLAMER LENS, - 14.5 DIOPTER, IN THE PATIENTS EYE ON (B)(6) 2012. THE LENS WAS EXPLANTED ON (B)(6) 2019 DUE TO CATARACT DEVELOPED. ADDITIONAL INFORMATION HAS BEEN REQUESTED BUT NONE HAS BEEN FORTHCOMING. IF ADDITIONAL INFORMATION IS RECEIVED, A SUPPLEMENTAL MEDWATCH WILL BE SUBMITTED. Manufacturer Narra…	Lens Extraction	unknown
https://www.accessdata.fda.gov/scripts/cdrh/cfdocs/cfMAUDE/Detail.CFM?MDRFOI__ID=4592014&pc=MTA	2023826-2015-00279	2012-01-12	Injury	STAAR SURGICAL COMPANY AG	2015-03-11	MTA	ICL (IMPLANTABLE COLLAMER LENS)	Appropriate Term/Code Not Available	Cataract; No Code Available	P030016	NA	1	Event Description: THE REPORTER INDICATED THE SURGEON IMPLANTED A 12.0MM ICM120V4 IMPLANTABLE COLLAMER LENS IN THE PATIENT'S LEFT EYE (OS) ON (B)(6) 2011 AND GLARES/HALOES WERE OBSERVED ON (B)(6) 2012. THE LENS WAS EXPLANTED ON (B)(4) 2014 AND WAS NOT REPLACED. THE PATIENT'S BEST-CORRECTED VISUAL ACUITY WAS 20/20. SEE MFR REPORT # 2023826-2015-00278 FOR THE PATIENT'S OTHER EYE. Manufacturer Narra…	Lens Extraction	Resolved
https://www.accessdata.fda.gov/scripts/cdrh/cfdocs/cfMAUDE/Detail.CFM?MDRFOI__ID=4600860&pc=MTA	2023826-2015-00309	2014-10-01	Injury	STAAR SURGICAL COMPANY AG	2015-03-13	MTA	ICL (IMPLANTABLE COLLAMER LENS)	Appropriate Term/Code Not Available	Cataract; No Code Available	P030016	NA	1	Event Description: THE REPORTER INDICATED THE SURGEON IMPLANTED A 13.2MM VICM13.2 IMPLANTABLE COLLAMER LENS IN THE PATIENT'S RIGHT EYE (OD) ON (B)(6) 2011. THE LENS WAS EXPLANTED ON (B)(6) 2014 DUE TO LENS OPACITY (CATARACT). THE CATARACT WAS REMOVED BY PHACO-EMULSIFICATION SURGERY AND AN IOL WAS IMPLANTED. POST-OP, THE PATIENT WAS PSEUPHAKIC AND THE UNCORRECTED VISUAL ACUITY WAS 20/20. Manufactu…	Lens Extraction + Secondary Operation	Resolved
https://www.accessdata.fda.gov/scripts/cdrh/cfdocs/cfMAUDE/Detail.CFM?MDRFOI__ID=4592739&pc=MTA	2023826-2015-00233	2015-01-03	Injury	STAAR SURGICAL COMPANY	2015-03-11	MTA	ICL (IMPLANTABLE COLLAMER LENS)	Appropriate Term/Code Not Available	Cataract; No Code Available	P030016	NA	1	Event Description: THE REPORTER INDICATED THE SURGEON IMPLANTED A 12.0MM ICM120V4 IMPLANTABLE COLLAMER LENS IN THE PATIENT'S LEFT EYE (OS) ON (B)(6) 2010. THE LENS WAS EXPLANTED ON (B)(6) 2015 DUE TO LENS OPACITY (NUCLEAR SCLEROSIS). THE CATARACT WAS REMOVED BY PHACO-EMULSIFICATION SURGERY AND AN IOL WAS IMPLANTED._x000D_ Manufacturer Narrative: (B)(4): DEVICE EVALUATED BY MANUFACTURER? NO - LENS…	Lens Extraction + Secondary Operation	unknown
https://www.accessdata.fda.gov/scripts/cdrh/cfdocs/cfMAUDE/Detail.CFM?MDRFOI__ID=4639048&pc=MTA	2023826-2015-00387	2015-03-10	Injury	STAAR SURGICAL COMPANY	2015-03-27	MTA	ICL (IMPLANTABLE COLLAMER LENS)	Appropriate Term/Code Not Available	Cataract; No Code Available	P030016	NA	1	Event Description: THE REPORTER STATED THE SURGEON EXPLANTED A 12.6MM MICL12.6 IMPLANTABLE COLLAMER LENS FROM THE PATIENT'S LEFT EYE (OS) ON (B)(6) 2015 DUE TO THE DEVELOPMENT OF A TRAUMATIC CATARACT . THE LENS WAS IMPLANTED ON (B)(6) 2011. THE CATARACT WAS REMOVED AND AN IOL WAS IMPLANTED. A SUTURE WAS REQUIRED. THE PATIENT IS DOING WELL. THE LENS WAS DISCARDED BY THE FACILITY._x000D_ Manufactur…	Lens Extraction + Secondary Operation	Resolved
https://www.accessdata.fda.gov/scripts/cdrh/cfdocs/cfMAUDE/Detail.CFM?MDRFOI__ID=4822542&pc=MTA	2023826-2015-00645	NA	Injury	STAAR SURGICAL COMPANY AG	2015-06-05	MTA	ICL (IMPLANTABLE COLLAMER LENS)	Appropriate Term/Code Not Available	Cataract; No Code Available	P030016	NA	1	Event Description: THE REPORTER INDICATED THE SURGEON EXPLANTED AN MICL IMPLANTABLE COLLAMER LENS DUE TO THE PATIENT DEVELOPED A CATARACT. THE PATIENT HAD THE MICL IMPLANTED IN 2008. ADDITIONAL INFORMATION HAS BEEN REQUESTED BUT NONE HAS BEEN FORTHCOMING. IF ADDITIONAL INFORMATION IS RECEIVED, A SUPPLEMENTAL MEDWATCH REPORT WILL BE SUBMITTED.Event Description: ADDITIONAL INFORMATION RECEIVED - TH…	Lens Extraction + Secondary Operation	unknown
https://www.accessdata.fda.gov/scripts/cdrh/cfdocs/cfMAUDE/Detail.CFM?MDRFOI__ID=6358894&pc=MTA	2023826-2017-00260	2013-04-16	Injury	STAAR SURGICAL COMPANY AG	2017-02-24	MTA	IMPLANTABLE COLLAMER LENS (ICL)	Device Operates Differently Than Expected	Cataract; No Code Available	NA	NA	1	Event Description: THE REPORTER INDICATED THAT THE SURGEON IMPLANTED A 13.2MM VICMO13.2, -8.50 DIOPTER IMPLANTABLE COLLAMER LENS, INTO THE PATIENT'S RIGHT EYE (OD) ON (B)(6) 2013. THE PATIENT EXPERIENCED LENS OPACITY (ASCO). THE LENS REMAINS IMPLANTED IN THE EYE AND THE PATIENT REPORTS NO RESTRICTIONS WITH ASCO. Manufacturer Narrative: CONCLUSION CODE: PER DFU, PATIENT'S AGE IS OVER 45 YEARS OF A…	Lens Retention	unknown
https://www.accessdata.fda.gov/scripts/cdrh/cfdocs/cfMAUDE/Detail.CFM?MDRFOI__ID=6358899&pc=MTA	2023826-2017-00261	2013-11-19	Injury	STAAR SURGICAL COMPANY AG	2017-02-24	MTA	IMPLANTABLE COLLAMER LENS (ICL)	Device Operates Differently Than Expected	Cataract; No Code Available	NA	NA	1	Event Description: THE REPORTER INDICATED THAT THE SURGEON IMPLANTED AN 13.2MM VICMO13.2, -8.00 DIOPTER IMPLANTABLE COLLAMER LENS, INTO THE PATIENT'S RIGHT EYE (OD) ON (B)(6) 2013. THE PATIENT EXPERIENCED LENS OPACITY (ASCO). THE LENS REMAINS IMPLANTED IN THE EYE AS THE PATIENT IS STILL HAPPY AND FEELS NO LIMITATIONS FROM THE ASCO. Manufacturer Narrative: THE REPORTER INDICATED THAT THE SURGEON I…	Lens Retention	unknown
https://www.accessdata.fda.gov/scripts/cdrh/cfdocs/cfMAUDE/Detail.CFM?MDRFOI__ID=6303775&pc=MTA	2023826-2017-00143	2016-06-04	Injury	STAAR SURGICAL COMPANY	2017-02-06	MTA	ICL (IMPLANTABLE COLLAMER LENS)	Device Operates Differently Than Expected	Cataract; No Code Available	N/A	NA	1	Event Description: THE REPORTER INDICATED THAT THE SURGEON IMPLANTED A 12.6MM VICMO12.6 IMPLANTABLE COLLAMER LENS, -12.0 DIOPTER, IN THE PATIENT'S LEFT EYE (OS) ON (B)(6) 2016. THE LENS WAS EXPLANTED ON (B)(6) 2016 DUE TO LENS OPACITY ASCO (ANTERIOR SUBCAPSULAR OPACITY) WHICH WAS OBSERVED ON (B)(6) 2016. ON PATIENT'S LAST VISIT ON (B)(6) 2016, THE PATIENT'S BEST CORRECTED VISUAL ACUITY WAS 20/30 …	Lens Extraction	unknown
https://www.accessdata.fda.gov/scripts/cdrh/cfdocs/cfMAUDE/Detail.CFM?MDRFOI__ID=7557824&pc=MTA	2023826-2018-00812	2018-03-16	Injury	STAAR SURGICAL COMPANY	2018-05-31	MTA	IMPLANTABLE COLLAMER LENS (ICL)	Device Operates Differently Than Expected	Cataract; No Code Available	N/A	NA	1	Event Description: THE REPORTER INDICATED THE SURGEON IMPLANTED AN 11.5MM ICM115V4 IMPLANTABLE COLLAMER LENS, DIOPTER -8.5 INTO THE PATIENT'S LEFT EYE (OS) ON (B)(6) 2012. ON (B)(6) 2018 THE LENS WAS EXPLANTED, THE SURGEON NOTING LENS OPACITY ASC. REPORTEDLY, ON (B)(6) 2018 CATARACT SURGERY AND IOL IMPLANTATION WAS PERFORMED WHICH RESOLVED THE PROBLEM. Manufacturer Narrative: DEVICE EVALUATION: T…	Lens Extraction + Secondary Operation	Resolved
https://www.accessdata.fda.gov/scripts/cdrh/cfdocs/cfMAUDE/Detail.CFM?MDRFOI__ID=6389922&pc=MTA	2023826-2017-00343	NA	Injury	STAAR SURGICAL COMPANY	2017-03-08	MTA	IMPLANTABLE COLLAMER LENS (ICL)	Device Operates Differently Than Expected	Cataract; No Code Available	N/A	NA	1	Event Description: ON (B)(6) 2017 THE REPORTER INDICATED AWARENESS "OF A CASE OF V4C LENS + LENS OPACITY." THE LENS WAS REMOVED AND PHACO IOL IMPLANTATION WAS PERFORMED. AT THE DATE OF MDR SUBMISSION, ATTEMPS TO OBTAIN ADDITIONAL INFORMATION HAVE BEEN UNSUCCESSFUL.Event Description: THE REPORTER INDICATED THAT THE SURGEON IMPLANTED A 13.2MM VICM5_13.2, DIOPTER -11.00 IMPLANTABLE COLLAMER LENS, IN…	Lens Extraction + Secondary Operation	unknown
https://www.accessdata.fda.gov/scripts/cdrh/cfdocs/cfMAUDE/Detail.CFM?MDRFOI__ID=6740169&pc=MTA	2023826-2017-01236	NA	Injury	STAAR SURGICAL COMPANY	2017-07-25	MTA	IMPLANTABLE COLLAMER LENS (ICL)	Device Operates Differently Than Expected	Cataract; No Code Available	P030016	NA	1	Event Description: THE REPORTER STATED THAT THE SURGEON IMPLANTED A 13.2MM MICL 13.2 IMPLANTABLE COLLAMER LENS, -13.0 DIOPTER, IN THE PATIENTS RIGHT EYE (OD) ON (B)(6) 2015. THE REPORTED STATED THAT THE LENS IS SCHEDULED TO BE REMOVED ON (B)(6) 2017 DUE TO THE PATIENT FORMING CATARACTS. THE REPORTER INDICTED THAT CATARACT SURGERY IS BEING PERFORMED AND A TECNIS IOL FROM A DIFFERENT MANUFACTURER I…	Lens Extraction + Secondary Operation	Resolved
https://www.accessdata.fda.gov/scripts/cdrh/cfdocs/cfMAUDE/Detail.CFM?MDRFOI__ID=6740468&pc=MTA	2023826-2017-01237	NA	Injury	STAAR SURGICAL COMPANY	2017-07-25	MTA	IMPLANTABLE COLLAMER LENS (ICL)	Device Operates Differently Than Expected	Cataract; No Code Available	P030016	NA	1	Event Description: THE REPORTER STATED THAT THE SURGEON IMPLANTED A 13.2MM MICL 13.2 IMPLANTABLE COLLAMER LENS, -12.5 DIOPTER, IN THE PATIENTS LEFT EYE (OS) ON (B)(6) 2015. THE REPORTED STATED THAT THE LENS IS SCHEDULED TO BE REMOVED ON (B)(6) 2017 DUE TO THE PATIENT FORMING CATARACTS. THE REPORTER INDICTED THAT CATARACT SURGERY IS BEING PERFORMED AND A TECNIS IOL FROM ANOTHER MANUFACTURER IS BEI…	Lens Extraction + Secondary Operation	Resolved
https://www.accessdata.fda.gov/scripts/cdrh/cfdocs/cfMAUDE/Detail.CFM?MDRFOI__ID=6879893&pc=MTA	2023826-2017-01480	2015-12-09	Injury	STAAR SURGICAL COMPANY	2017-09-20	MTA	IMPLANTABLE COLLAMER LENS (ICL)	Device Operates Differently Than Expected; Adverse Event Without Identified Device or Use Problem	Cataract; No Code Available	N/A	NA	1	Event Description: THE REPORTER INDICATED THAT THE SURGEON IMPLANTED A 13.2 MM VICMO13.2, DIOPTER -14.0 IMPLANTABLE COLLAMER LENS, INTO THE PATIENT'S RIGHT EYE (OD) ON (B)(6) 2015. ON THE SAME DATE, INTRAOPERATIVELY, THE LENS WAS EXPLANTED DUE TO LENS OPACITY (ASCO). REPORTEDLY, THE TOP OF THE LENS WAS NICKED BY THE SURGEON IN ERROR, WHICH LED TO "CAPSULE MEMBRANE DAMAGE." THE ICL WAS THEN REMOVE…	Lens Extraction + Secondary Operation	unknown
https://www.accessdata.fda.gov/scripts/cdrh/cfdocs/cfMAUDE/Detail.CFM?MDRFOI__ID=5577503&pc=MTA	2023826-2016-00438	2016-01-11	Injury	STAAR SURGICAL COMPANY	2016-04-14	MTA	ICL (IMPLANTABLE COLLAMER LENS)	Device Operates Differently Than Expected; Appropriate Term/Code Not Available	Cataract; No Code Available	NA	NA	1	Event Description: THE REPORTER INDICATED THE SURGEON IMPLANTED A 13.7MM VICMO13.7 -08.50 DIOPTER IMPLANTABLE COLLAMER LENS IN THE PATIENT'S RIGHT EYE (OD) ON (B)(6) 2015. A LENS OPACITY (CORTICAL) WAS OBSERVED ON (B)(6) 2015. THE LENS WAS EXPLANTED ON (B)(6) 2016, CATARACT SURGERY WAS PERFORMED AND A IOL WAS IMPLANTED. PATIENT'S LAST VISIT ON 02/22/2016, BCVA WAS 20/20. SEE MFR. #2023826-2016-00…	Lens Extraction + Secondary Operation	Resolved
https://www.accessdata.fda.gov/scripts/cdrh/cfdocs/cfMAUDE/Detail.CFM?MDRFOI__ID=6289852&pc=MTA	2023826-2017-00169	2016-08-17	Injury	STAAR SURGICAL COMPANY	2017-01-31	MTA	ICL (IMPLANTABLE COLLAMER LENS)	Device Operates Differently Than Expected; Insufficient Information	Cataract; No Code Available	N/A	NA	1	Event Description: THE REPORTER STATED THE SURGEON IMPLANTED A 13.2MM VICMO 13.2, -12.0 DIOPTER, IMPLANTABLE COLLAMER LENS IN THE PATIENT'S RIGHT EYE (OD) ON (B)(6) 2016. THE REPORTER STATED CAPSULAR TEAR AND LENS OPACITY (ANTERIOR SUBCAPSULAR OPACITY) WAS OBSERVED ON (B)(6) 2016. THE LENS WAS EXPLANTED ON THE SAME DAY. PHACO-EMULSIFICATION (CATARACT SURGERY) WAS PERFORMED AND AN IOL WAS IMPLANTE…	Lens Extraction + Secondary Operation	unknown
https://www.accessdata.fda.gov/scripts/cdrh/cfdocs/cfMAUDE/Detail.CFM?MDRFOI__ID=6080846&pc=MTA	2023826-2016-01598	2014-11-07	Injury	STAAR SURGICAL COMPANY AG	2016-11-04	MTA	ICL (IMPLANTABLE COLLAMER LENS)	Inadequacy of Device Shape and/or Size	Cataract; No Code Available	N/A	NA	1	Event Description: THE REPORTER INDICATED THE SURGEON IMPLANTED A 11.5MM ICM115V4 IMPLANTABLE COLLAMER LENS, -16.0 DIOPTER, IN THE PATIENT'S RIGHT EYE (OD) ON (B)(6) 2013. THE LENS WAS EXPLANTED ON (B)(6) 2016 DUE TO LOW VAULTING AND LENS OPACITY (ANTERIOR SUBCAPSULAR), NOTED ON (B)(6) 2014. THE LENS WAS EXCHANGED FOR A LONGER LENS AND THE PROBLEM WAS RESOLVED. THE PATIENT'S POST-OP BEST-CORRECTE…	Lens Exchange	Resolved
https://www.accessdata.fda.gov/scripts/cdrh/cfdocs/cfMAUDE/Detail.CFM?MDRFOI__ID=6404792&pc=MTA	2023826-2017-00401	2016-07-08	Injury	STAAR SURGICAL COMPANY AG	2017-03-14	MTA	ICL (IMPLANTABLE COLLAMER LENS)	Inadequacy of Device Shape and/or Size	Cataract; No Code Available	N/A	NA	1	Event Description: THE REPORTER INDICATED THAT THE SURGEON IMPLANTED A 11.5MM ICM115V4 IMPLANTABLE COLLAMER LENS, -17.0 DIOPTER, IN THE PATIENT'S RIGHT EYE (OD) ON (B)(6) 2013. ON (B)(6) 2016 THE LENS WAS EXCHANGED FOR A LONGER LENS DUE TO LOW VAULT. THE PROBLEM WAS RESOLVED. AS OF THE DATE OF MDR SUBMISSION, THE LENS HAS BEEN RETURNED, BUT NOT YET EVALUATED. Manufacturer Narrative: VISUAL INSPEC…	Lens Exchange	Resolved
https://www.accessdata.fda.gov/scripts/cdrh/cfdocs/cfMAUDE/Detail.CFM?MDRFOI__ID=6289966&pc=MTA	2023826-2017-00149	2016-08-06	Injury	STAAR SURGICAL COMPANY AG	2017-01-31	MTA	IMPLANTABLE COLLAMER LENS (ICL)	Inadequacy of Device Shape and/or Size	Cataract; No Code Available	NA	NA	1	Event Description: THE REPORTER INDICATED THAT THE SURGEON IMPLANTED AN 11.5MM (B)(4) -12.5 DIOPTER IMPLANTABLE COLLAMER LENS, INTO THE PATIENT'S LEFT EYE (OS) ON (B)(6) 2012. THE LENS WAS EXPLANTED ON (B)(6) 2016 DUE TO THE PATIENT REPORTING LOW VAULT AND LATE LENS OPACITY (ASCO). ON (B)(6) 2016 THE LENS WAS EXCHANGED FOR A LONGER LENS. THE PROBLEM WAS NOT RESOLVED AND THE LENS WAS EXCHANGED AGA…	Lens Exchange	Not_Resolved
https://www.accessdata.fda.gov/scripts/cdrh/cfdocs/cfMAUDE/Detail.CFM?MDRFOI__ID=6214422&pc=MTA	2023826-2016-01843	2016-11-24	Injury	STAAR SURGICAL COMPANY	2016-12-29	MTA	ICL (IMPLANTABLE COLLAMER LENS)	Inadequacy of Device Shape and/or Size	Cataract; No Code Available	N/A	NA	1	Event Description: THE REPORTER INDICATED THAT THE SURGEON IMPLANTED A 12.6MM VICMO12.6 IMPLANTABLE COLLAMER LENS, -06.50 DIOPTER IN THE PATIENT'S RIGHT EYE (OD) ON (B)(6) 2016. THE LENS WAS EXPLANTED ON (B)(6) 2016 DUE TO LOW VAULTING, LENS OPACITY, AND ANTERIOR SUBCAPSULAR CATARACT. Manufacturer Narrative: DEVICE EVALUATION: LENS WAS RETURNED DRY, IN LENS CASE/VIAL. VISUAL INSPECTION FOUND THAT…	Lens Extraction	unknown
https://www.accessdata.fda.gov/scripts/cdrh/cfdocs/cfMAUDE/Detail.CFM?MDRFOI__ID=6214458&pc=MTA	2023826-2016-01844	2016-11-24	Injury	STAAR SURGICAL COMPANY	2016-12-29	MTA	ICL (IMPLANTABLE COLLAMER LENS)	Inadequacy of Device Shape and/or Size	Cataract; No Code Available	N/A	NA	1	Event Description: THE REPORTER INDICATED THAT THE SURGEON IMPLANTED A 12.6MM VICMO12.6 IMPLANTABLE COLLAMER LENS, -06.50 DIOPTER IN THE PATIENT'S LEFT EYE (OS) ON (B)(6) 2016. THE LENS WAS EXPLANTED ON (B)(6) 2016 DUE TO LOW VAULTING, LENS OPACITY, AND ANTERIOR SUBCAPSULAR CATARACT. Manufacturer Narrative: ADDITIONAL EVENT DESCRIPTION - PATIENT'S POST-OP BEST CORRECTED VISUAL ACUITY WAS 20/25 AS…	Lens Extraction	unknown
https://www.accessdata.fda.gov/scripts/cdrh/cfdocs/cfMAUDE/Detail.CFM?MDRFOI__ID=7495937&pc=MTA	2023826-2018-00713	2017-02-02	Injury	STAAR SURGICAL COMPANY	2018-05-08	MTA	IMPLANTABLE COLLAMER LENS (ICL)	Inadequacy of Device Shape and/or Size	Cataract; No Code Available	N/A	NA	1	Event Description: THE REPORTER INDICATED THAT THE SURGEON IMPLANTED A 13.2 MM VICM5_13.2 IMPLANTABLE COLLAMER LENS, -9.0 DIOPTER INTO THE PATIENT'S LEFT EYE (OS) ON (B)(6) 2017. ON (B)(6) 2017 THE LENS WAS EXPLANTED DUE TO LOW VAULT AND LENS OPACITY-ASC. THE SURGEON THEN PERFORMED CATARACT SURGERY WITH A TRIFOCAL LENS. Manufacturer Narrative: DEVICE EVALUATION: THE LENS WAS RETURNED IN LIQUID, I…	Lens Extraction + Secondary Operation	unknown
https://www.accessdata.fda.gov/scripts/cdrh/cfdocs/cfMAUDE/Detail.CFM?MDRFOI__ID=7177027&pc=MTA	2023826-2018-00008	2017-10-09	Injury	STAAR SURGICAL COMPANY	2018-01-09	MTA	IMPLANTABLE COLLAMER LENS (ICL)	Inadequacy of Device Shape and/or Size	Cataract; No Code Available	NA	NA	1	Event Description: THE REPORTER INDICATED THE SURGEON IMPLANTED A 13.2MM VICMO13.2 IMPLANTABLE COLLAMER LENS, -15.00 DIOPTER, IN THE PATIENT'S LEFT EYE (OS), ON (B)(6) 2017. THE LENS WAS EXPLANTED ON (B)(6) 2017 DUE TO LOW VAULTING AND LENS OPACITY (ANTERIOR SUBCAPSULAR), OBSERVED ON (B)(6) 2017. THE LENS WAS NOT EXCHANGED FOR ANOTHER LENS. Manufacturer Narrative: THE REPORTER INDICATED THE LENS …	Lens Extraction + Secondary Operation	unknown
https://www.accessdata.fda.gov/scripts/cdrh/cfdocs/cfMAUDE/Detail.CFM?MDRFOI__ID=7339941&pc=MTA	2023826-2018-00412	2017-12-18	Injury	STAAR SURGICAL COMPANY	2018-03-14	MTA	IMPLANTABLE COLLAMER LENS (ICL)	Inadequacy of Device Shape and/or Size	Cataract; No Code Available	NA	NA	1	Event Description: THE REPORTER INDICATED THE SURGEON IMPLANTED A 12.6MM VICM5_12.6 IMPLANTABLE COLLAMER LENS, -05.50 DIOPTER, IN THE PATIENT'S RIGHT EYE (OD) ON (B)(6) 2017. THE LENS WAS EXPLANTED ON (B)(6) 2018 DUE LENS OPACITY (CATARACT). CATARACT SURGERY (PHACOEMULSIFICATION) WAS PERFORMED AND AN INTRAOCULAR LENS (IOL) WAS IMPLANTED. THE REPORTER INDICATED THE PATIENT IS ALLERGIC TO SULPHUR M…	Lens Extraction + Secondary Operation	unknown
https://www.accessdata.fda.gov/scripts/cdrh/cfdocs/cfMAUDE/Detail.CFM?MDRFOI__ID=10311086&pc=MTA	2023826-2020-01496	NA	Injury	STAAR SURGICAL COMPANY	2020-07-22	MTA	IMPLANTABLE COLLAMER LENS (ICL)	Inadequacy of Device Shape and/or Size	Cataract; No Code Available	P030016	NA	1	Event Description: THE REPORTER INDICATE THAT A 13.2MM, MICL13.2, -10.50 DIOPTER, IMPLANTABLE COLLAMER LENS WAS IMPLANTED INTO THE PATIENTS RIGHT EYE (OD) ON (B)(6) 2012. THE PATIENT EXPERIENCED LOW VAULT AND ASC CATARACT WAS OBSERVED. ON (B)(6) 2020 THE LENS WAS EXPLANTED AND PHACO-EMULSIFICATION AND IOL IMPLANTATION WAS PERFORMED, PROBLEM WAS RESOLVED. Manufacturer Narrative: (B)(4). NO SIMILAR…	Lens Extraction + Secondary Operation	Resolved
https://www.accessdata.fda.gov/scripts/cdrh/cfdocs/cfMAUDE/Detail.CFM?MDRFOI__ID=4592589&pc=MTA	2023826-2015-00235	2014-06-25	Injury	STAAR SURGICAL COMPANY	2015-03-11	MTA	ICL (IMPLANTABLE COLLAMER LENS)	Inadequacy of Device Shape and/or Size; Appropriate Term/Code Not Available	Cataract; No Code Available	P030016	NA	1	Event Description: THE REPORTER INDICATED THE SURGEON IMPLANTED A 11.5MM ICM115V4 IMPLANTABLE COLLAMER LENS IN THE PATIENT'S LEFT EYE (OS) ON (B)(6) 2010. THE LENS WAS EXPLANTED ON (B)(6) 2014 DUE TO LOW VAULTING AND LENS OPACITY (CORTICAL). THE LENS WAS EXCHANGED FOR A LONGER LENS AND THE PROBLEM WAS RESOLVED._x000D_ Manufacturer Narrative: (B)(4): DEVICE EVALUATED BY MANUFACTURER? NO - LENS NOT…	Lens Exchange	Resolved
https://www.accessdata.fda.gov/scripts/cdrh/cfdocs/cfMAUDE/Detail.CFM?MDRFOI__ID=4592661&pc=MTA	2023826-2015-00277	2014-07-14	Injury	STAAR SURGICAL COMPANY AG	2015-03-11	MTA	ICL (IMPLANTABLE COLLAMER LENS)	Inadequacy of Device Shape and/or Size; Appropriate Term/Code Not Available	Cataract; No Code Available	P030016	NA	1	Event Description: THE REPORTER INDICATED THE SURGEON IMPLANTED A 11.5MM ICM115V4 IMPLANTABLE COLLAMER LENS IN THE PATIENT'S LEFT EYE (OS) ON (B)(6) 2011. THE LENS WAS EXPLANTED ON (B)(6) 2014 DUE TO LOW VAULTING AND ANTERIOR SUBCAPSULAR OPACITY. THE LENS WAS EXCHANGED FOR A LONGER LENGTH AND THIS RESOLVED THE PROBLEM. THE PATIENT'S BEST-CORRECTED VISUAL ACUITY WAS 20/25._x000D_ Manufacturer Narr…	Lens Exchange	Resolved
https://www.accessdata.fda.gov/scripts/cdrh/cfdocs/cfMAUDE/Detail.CFM?MDRFOI__ID=5655201&pc=MTA	2023826-2016-00685	2014-09-18	Injury	STAAR SURGICAL COMPANY AG	2016-05-13	MTA	ICL (IMPLANTABLE COLLAMER LENS)	Inadequacy of Device Shape and/or Size; Appropriate Term/Code Not Available	Cataract; No Code Available	N/A	NA	1	Event Description: THE REPORTER STATED THAT THE SURGEON IMPLANTED AN 11.5MM ICM115V4, -20 DIOPTER IMPLANTABLE COLLAMER LENS IN TO THE PATIENT'S RIGHT EYE (OD) ON (B)(6) 2014. LOW VAULT AND AN ANTERIOR SUBCAPSULAR CATARACT WERE OBSERVED ON (B)(6) 2014. THE LENS WAS EXPLANTED, CATARACT SURGERY WAS PERFORMED, AND AN IOL WAS IMPLANTED ON (B)(6) 2015. Manufacturer Narrative: ADDITIONAL INFORMATION: TH…	Lens Extraction + Secondary Operation	Resolved
https://www.accessdata.fda.gov/scripts/cdrh/cfdocs/cfMAUDE/Detail.CFM?MDRFOI__ID=4592687&pc=MTA	2023826-2015-00281	2014-11-18	Injury	STAAR SURGICAL COMPANY AG	2015-03-11	MTA	ICL (IMPLANTABLE COLLAMER LENS)	Inadequacy of Device Shape and/or Size; Appropriate Term/Code Not Available	Cataract; No Code Available	P030016	NA	1	Event Description: THE REPORTER INDICATED THE SURGEON IMPLANTED A 12.0MM ICM120V4 IMPLANTABLE COLLAMER LENS IN THE PATIENT'S RIGHT EYE (OD) ON (B)(6) 2012. THE LENS WAS EXPLANTED ON (B)(6) 2014 DUE TO LOW VAULTING AND ANTERIOR SUBCAPSULAR OPACITY. THE LENS WAS EXCHANGED FOR A LONGER LENGTH AND THIS RESOLVED THE PROBLEM. THE PATIENT'S LASTEST UCVA WAS 20/30. SEE MFR REPORT #2023826-2015-00282 FOR …	Lens Exchange	Resolved
https://www.accessdata.fda.gov/scripts/cdrh/cfdocs/cfMAUDE/Detail.CFM?MDRFOI__ID=4592699&pc=MTA	2023826-2015-00282	2014-11-18	Injury	STAAR SURGICAL COMPANY AG	2015-03-11	MTA	ICL (IMPLANTABLE COLLAMER LENS)	Inadequacy of Device Shape and/or Size; Appropriate Term/Code Not Available	Cataract; No Code Available	P030016	NA	1	Event Description: THE REPORTER INDICATED THE SURGEON IMPLANTED A 12.0MM ICM120V4 IMPLANTABLE COLLAMER LENS IN THE PATIENT'S LEFT EYE (OS) ON (B)(6) 2012. THE LENS WAS EXPLANTED ON (B)(6) 2014 DUE TO LOW VAULTING AND ANTERIOR SUBCAPSULAR OPACITY. THE LENS WAS EXCHANGED FOR A LONGER LENGTH AND THIS RESOLVED THE PROBLEM. THE PATIENT'S LASTEST UCVA WAS 20/20. SEE MFR REPORT #2023826-2015-00281 FOR T…	Lens Exchange	Resolved
https://www.accessdata.fda.gov/scripts/cdrh/cfdocs/cfMAUDE/Detail.CFM?MDRFOI__ID=5154946&pc=MTA	2023826-2015-01267	2015-02-21	Injury	STAAR SURGICAL COMPANY AG	2015-10-15	MTA	ICL (IMPLANTABLE COLLAMER LENS)	Inadequacy of Device Shape and/or Size; Appropriate Term/Code Not Available	Cataract; No Code Available	N/A	NA	1	Event Description: THE REPORTER INDICATED THE SURGEON IMPLANTED A 11.5MM ICM115V4 IMPLANTABLE COLLAMER LENS, -16.5 DIOPTER IN THE PATIENT'S LEFT EYE (OS) ON (B)(6) 2010. LENS OPACITY (ASCO) WAS NOTED ON (B)(6) 2015. THE LENS WAS EXPLANTED ON (B)(6) 2015 DUE TO LOW VAULTING. THE LENS WAS EXCHANGED FOR A LONGER LENS AND THE PROBLEM WAS RESOLVED. POST-OP VISIT ON (B)(6) 2015, UCVA WAS 20/26._x000D_ …	Lens Exchange	Resolved
https://www.accessdata.fda.gov/scripts/cdrh/cfdocs/cfMAUDE/Detail.CFM?MDRFOI__ID=4727980&pc=MTA	2023826-2015-00472	2015-03-12	Injury	STAAR SURGICAL COMPANY	2015-04-24	MTA	ICL (IMPLANTABLE COLLAMER LENS)	Inadequacy of Device Shape and/or Size; Appropriate Term/Code Not Available	Cataract; No Code Available	P030016	NA	1	Event Description: THE REPORTER INDICATED THE SURGEON IMPLANTED A 12.1MM MICL12.1 IMPLANTABLE COLLAMER LENS IN THE PATIENT'S RIGHT EYE (OD) ON (B)(6) 2014. THE LENS WAS EXPLANTED ON (B)(6) 2015 DUE TO LOW VAULTING. LENS OPACITY (ANTERIOR) WAS NOTED ON (B)(6) 2015. THE LENS WAS EXCHANGED FOR A LONGER LENS AND THE PROBLEM WAS RESOLVED. THE PATIENT'S POST-OP BEST-CORRECTED VISUAL ACUITY WAS 20/20. T…	Lens Exchange	Resolved
https://www.accessdata.fda.gov/scripts/cdrh/cfdocs/cfMAUDE/Detail.CFM?MDRFOI__ID=5161950&pc=MTA	2023826-2015-01278	2015-03-25	Injury	STAAR SURGICAL COMPANY AG	2015-10-20	MTA	ICL (IMPLANTABLE COLLAMER LENS)	Inadequacy of Device Shape and/or Size; Appropriate Term/Code Not Available	Cataract; No Code Available	P030016	NA	1	Event Description: THE REPORTER INDICATED THE SURGEON IMPLANTED A 12.0MM ICM120V4 IMPLANTABLE COLLAMER LENS, -12.0 DIOPTER IN THE PATIENT'S LEFT EYE (OS) ON (B)(6) 2010. A ANTERIOR SUBCAPSULAR CATARACT WAS OBSERVED ON (B)(6) 2015. THE LENS WAS EXPLANTED ON (B)(6) 2015 DUE TO LOW VAULTING. THE LENS WAS EXCHANGED FOR A LONGER LENS. THE PROBLEM WAS RESOLVED. PATIENT VISIT ON (B)(6) 2015 - UCVA WAS 2…	Lens Exchange	Resolved
https://www.accessdata.fda.gov/scripts/cdrh/cfdocs/cfMAUDE/Detail.CFM?MDRFOI__ID=5161958&pc=MTA	2023826-2015-01277	2015-03-25	Injury	STAAR SURGICAL COMPANY AG	2015-10-20	MTA	ICL (IMPLANTABLE COLLAMER LENS)	Inadequacy of Device Shape and/or Size; Appropriate Term/Code Not Available	Cataract; No Code Available	P030016	NA	1	Event Description: THE REPORTER INDICATED THE SURGEON IMPLANTED A 12.0MM ICM120V4 IMPLANTABLE COLLAMER LENS, -12.0 DIOPTER IN THE PATIENT'S RIGHT EYE (OD) ON (B)(6) 2010. A ANTERIOR SUBCAPSULAR CATARACT WAS OBSERVED ON (B)(6) 2015. THE LENS WAS EXPLANTED ON (B)(6) 2015 DUE TO LOW VAULTING. THE LENS WAS EXCHANGED FOR A LONGER LENS. THE PROBLEM WAS RESOLVED. PATIENT VISIT ON (B)(6) 2015 - UCVA WAS …	Lens Exchange	Resolved
https://www.accessdata.fda.gov/scripts/cdrh/cfdocs/cfMAUDE/Detail.CFM?MDRFOI__ID=5095987&pc=MTA	2023826-2015-01180	2015-08-20	Injury	STAAR SURGICAL COMPANY AG	2015-09-22	MTA	ICL (IMPLANTABLE COLLAMER LENS)	Inadequacy of Device Shape and/or Size; Appropriate Term/Code Not Available	Cataract; No Code Available	P030016	NA	1	Event Description: THE REPORTER INDICATED THE SURGEON IMPLANTED A 12.0MM ICM120V4, -16.00 DIOPTER IMPLANTABLE COLLAMER LENS IN THE PATIENT'S LEFT EYE (OS) ON (B)(6) 2009. LOW VAULT, REFRACTIVE CHANGE OVER TIME AND LENS OPACITY WAS OBSERVED ON (B)(6) 2015. THE LENS REMAINS IMPLANTED. SURGERY IS PENDING TO EXPLANT AND EXCHANGE FOR LONGER LENS. UNCORRECTED VISUAL ACUITY WAS 20/10 ON (B)(6) 2015. SEE…	Lens Exchange	Resolved
https://www.accessdata.fda.gov/scripts/cdrh/cfdocs/cfMAUDE/Detail.CFM?MDRFOI__ID=5707624&pc=MTA	2023826-2016-00696	2016-04-01	Injury	STAAR SURGICAL COMPANY	2016-06-08	MTA	ICL (IMPLANTABLE COLLAMER LENS)	Inadequacy of Device Shape and/or Size; Appropriate Term/Code Not Available	Cataract; No Code Available	NA	NA	1	Event Description: THE REPORTER INDICATED THE SURGEON IMPLANTED A 13.2MM VICMO13.2 IMPLANTABLE COLLAMER LENS, -09.50 DIOPTER, IN THE PATIENT'S LEFT EYE (OS) ON (B)(6) 2016. THE LENS WAS EXPLANTED ON (B)(6) 2016 DUE TO EXCESSIVE VAULTING. THE LENS WAS EXCHANGED FOR A SHORTER LENS. THE PATIENT'S POST-OP BEST-CORRECTED VISUAL ACUITY WAS 20/20 AND THE PATIENT HAD A MILD SUP. ANTERIOR CORTICAL OPACITY…	Lens Exchange	Resolved
https://www.accessdata.fda.gov/scripts/cdrh/cfdocs/cfMAUDE/Detail.CFM?MDRFOI__ID=5199510&pc=MTA	2023826-2015-01455	2015-02-28	Injury	STAAR SURGICAL COMPANY	2015-11-03	MTA	ICL (IMPLANTABLE COLLAMER LENS)	Inadequacy of Device Shape and/or Size; Device Operates Differently Than Expected; Appropriate Term/Code Not Available	Cataract; No Code Available	N/A	NA	1	Event Description: THE REPORTER INDICATED THE SURGEON IMPLANTED A 12.0MM ICM120V4 IMPLANTABLE COLLAMER -12.50 DIOPTER LENS IN THE PATIENT'S LEFT EYE (OS) ON (B)(6) 2011. LOW VAULT AND A ANTERIOR SUBCAPSULAR CATARACT WAS OBSERVED ON (B)(6) 2015. THE ICL WAS EXPLANTED, CATARACT SURGERY AND IOL IMPLANTATION WAS PERFORMED ON (B)(6) 2015. PATIENT'S LAST VISIT ON (B)(6) 2015 - BCVA WAS 20/20 AND UCVA W…	Lens Extraction + Secondary Operation	unknown
https://www.accessdata.fda.gov/scripts/cdrh/cfdocs/cfMAUDE/Detail.CFM?MDRFOI__ID=4592752&pc=MTA	2023826-2015-00227	2013-08-04	Injury	STAAR SURGICAL COMPANY	2015-03-11	MTA	ICL (IMPLANTABLE COLLAMER LENS)	Inadequacy of Device Shape and/or Size; Unintended Movement; Appropriate Term/Code Not Available	Cataract; No Code Available	P030016	NA	1	Event Description: THE REPORTER INDICATED THE SURGEON IMPLANTED A 11.5MM ICM115V4 IMPLANTABLE COLLAMER LENS IN THE PATIENT'S RIGHT EYE (OD) ON (B)(6) 2013. THE LENS WAS EXPLANTED ON (B)(6) 2014 DUE TO LOW VAULTING, LENS ROTATION AND LENS OPACITY (ANTERIOR SUBCAPSULAR), WHICH WAS NOTED ON (B)(6) 2013. THE PATIENT HAD CATARACT SURGERY AND AN IOL WAS IMPLANTED. THE PATIENT'S POST-OP BEST-CORRECTED V…	Lens Extraction + Secondary Operation	Resolved
https://www.accessdata.fda.gov/scripts/cdrh/cfdocs/cfMAUDE/Detail.CFM?MDRFOI__ID=7562910&pc=MTA	2023826-2018-00836	2018-02-28	Injury	STAAR SURGICAL COMPANY	2018-06-01	MTA	IMPLANTABLE COLLAMER LENS (ICL)	Insufficient Information	Cataract; No Code Available	NA	NA	1	Event Description: THE REPORTER INDICATED THE SURGEON IMPLANTED A 12.1MM VICMO12.1 IMPLANTABLE COLLAMER LENS, -09.00 DIOPTER, IN THE PATIENT'S RIGHT EYE (OD) ON (B)(6) 2018. THE LENS WAS EXPLANTED ON (B)(6) 2018 DUE TO LENS OPACITY (ANTERIOR SUBCAPSULAR). CATARACT SURGERY WAS PERFORMED AND AN IOL WAS IMPLANTED. Manufacturer Narrative: ADDITIONAL DATA: DEVICE EVALUATION: LENS WAS RETURNED DRY IN M…	Lens Extraction + Secondary Operation	unknown
https://www.accessdata.fda.gov/scripts/cdrh/cfdocs/cfMAUDE/Detail.CFM?MDRFOI__ID=8962469&pc=MTA	2023826-2019-01587	2018-01-03	Injury	STAAR SURGICAL COMPANY	2019-09-04	MTA	IMPLANTABLE COLLAMER LENS (ICL)	Off-Label Use; Adverse Event Without Identified Device or Use Problem	Cataract; No Code Available	P030016	NA	1	Event Description: THE REPORTER INDICATED THE SURGEON IMPLANTED A 12.6MM MICL12.6 IMPLANTABLE COLLAMER LENS, -15.0 DIOPTER, IN THE PATIENTS RIGHT EYE (OD) ON (B)(6) 2018. THE LENS WAS EXPLANTED ON (B)(6) 2019 DUE TO THE DEVELOPMENT OF A CATARACT. THE CATARACT WAS REMOVED. ADDITIONAL INFORMATION HAS BEEN REQUESTED BUT NONE HAS BEEN FORTHCOMING. IF ADDITIONAL INFORMATION IS RECEIVED, A SUPPLEMENTAL…	Lens Extraction + Secondary Operation	unknown
https://www.accessdata.fda.gov/scripts/cdrh/cfdocs/cfMAUDE/Detail.CFM?MDRFOI__ID=8889749&pc=MTA	2023826-2019-01444	2019-06-22	Injury	STAAR SURGICAL COMPANY	2019-08-13	MTA	IMPLANTABLE COLLAMER LENS (ICL)	Inadequacy of Device Shape and/or Size	Cataract; No Known Impact Or Consequence To Patient	N/A	NA	1	Event Description: THE REPORTER INDICATED THAT THE SURGEON IMPLANTED A 12.6MM VICM5 12.6, -06.00 DIOPTER, IMPLANTABLE COLLAMER LENS INTO THE PATIENT'S RIGHT EYE (OD) ON (B)(6) 2019. LOW VAULT WAS OBSERVED AND LENS REMAINS IMPLANTED. REPORTER INDICATED "THE VAULT WAS 271 MICROMETERS ONE WEEK AFTER SURGERY ((B)(6) 2019), BUT AFTER THAT THE VAULT DECREASED." SURGEON CONTINUES TO MONITOR AND IS "CONS…	Lens Retention	unknown
https://www.accessdata.fda.gov/scripts/cdrh/cfdocs/cfMAUDE/Detail.CFM?MDRFOI__ID=8889750&pc=MTA	2023826-2019-01445	2019-06-22	Injury	STAAR SURGICAL COMPANY	2019-08-13	MTA	IMPLANTABLE COLLAMER LENS (ICL)	Inadequacy of Device Shape and/or Size	Cataract; No Known Impact Or Consequence To Patient	N/A	NA	1	Event Description: THE REPORTER INDICATED THAT THE SURGEON IMPLANTED A 12.6MM VICM5 12.6, -06.50 DIOPTER, IMPLANTABLE COLLAMER LENS INTO THE PATIENT'S LEFT EYE (OS) ON (B)(6) 2019. LOW VAULT WAS OBSERVED AND LENS REMAINS IMPLANTED. REPORTER INDICATED "THE VAULT WAS 241 MICROMETERS ONE WEEK AFTER SURGERY ((B)(6) 2019), BUT AFTER THAT THE VAULT DECREASED." SURGEON CONTINUES TO MONITOR AND IS "CONSI…	Lens Retention	unknown
https://www.accessdata.fda.gov/scripts/cdrh/cfdocs/cfMAUDE/Detail.CFM?MDRFOI__ID=6577133&pc=MTA	2023826-2017-00836	2017-04-18	Injury	STAAR SURGICAL COMPANY	2017-05-18	MTA	IMPLANTABLE COLLAMER LENS (ICL)	Adverse Event Without Identified Device or Use Problem	Cataract; Visual Disturbances	P030016	NA	1	Event Description: THE PATIENT REPORTED THE SURGEON IMPLANTED A 12.6MM MICL12.6 IMPLANTABLE COLLAMER LENS, -12.0 DIOPTER, IN HIS RIGHT EYE (OD). THE PATIENT REPORTED HAD LOST VISION DUE TO DEVELOPMENT OF A CATARACT OR COULD BE A FILM BETWEEN NATURAL LENS AND ICL OR THE START OF CATARACTS. THE LENS WAS IMPLANTED ON (B)(6) 2011 AND REMAINS IMPLANTED. ADDITIONAL INFORMATION HAS BEEN REQUESTED BUT NO…	Lens Retention	unknown
https://www.accessdata.fda.gov/scripts/cdrh/cfdocs/cfMAUDE/Detail.CFM?MDRFOI__ID=6426147&pc=MTA	2023826-2017-00471	NA	Injury	STAAR SURGICAL COMPANY	2017-03-22	MTA	IMPLANTABLE COLLAMER LENS (ICL)	Adverse Event Without Identified Device or Use Problem	Cataract; Visual Disturbances	P030016	NA	1	Event Description: THE PATIENT REPORTED THE SURGEON IMPLANTED A 13.2MM MICL13.2 IMPLANTABLE COLLAMER LENS, -5.5 DIOPTER, IN HER LEFT EYE (OS). THE PATIENT REPORTED EYE IS WORSE FOR READING. THE LENS WAS IMPLANTED ON (B)(6) 2012. THE FACILITY REPORTED THEY CONFIRMED THE PATIENT REPORT. DATE OF LAST VISIT WAS (B)(6) 2016 AND REPORTED PATIENT HAD PRESBYOPIA, WITH A MILD CATARACT. NO MEDICATIONS OR T…	Lens Retention	unknown
https://www.accessdata.fda.gov/scripts/cdrh/cfdocs/cfMAUDE/Detail.CFM?MDRFOI__ID=6546330&pc=MTA	2023826-2017-00772	NA	Injury	STAAR SURGICAL COMPANY	2017-05-04	MTA	IMPLANTABLE COLLAMER LENS (ICL)	Adverse Event Without Identified Device or Use Problem	Cataract; Visual Disturbances	P030016	NA	1	Event Description: THE PATIENT REPORTED THE SURGEON IMPLANTED A 12.6MM MICL12.6 IMPLANTABLE COLLAMER LENS, -12.5 DIOPTER, IN HER LEFT EYE (OS). THE PATIENT REPORTED REDUCED VISUAL ACUITY AND WAS WEARING GLASSES. THE LENS WAS IMPLANTED ON (B)(6) 2011. THE FACILITY REPORTED THE PATIENT HAD DECREASED VISUAL ACUITY DUE TO A CATARACT HAD DEVELOPED. SURGERY IS PLANNED AT A FUTURE DATE FOR REMOVAL OF CA…	Lens Retention	unknown
https://www.accessdata.fda.gov/scripts/cdrh/cfdocs/cfMAUDE/Detail.CFM?MDRFOI__ID=8323983&pc=MTA	2023826-2019-00238	NA	Injury	STAAR SURGICAL COMPANY AG	2019-02-08 05:00:00	MTA	IMPLANTABLE COLLAMER LENS (ICL)	Adverse Event Without Identified Device or Use Problem	Cataract; Visual Disturbances	P030016	NA	1	Event Description: THE REPORTER INDICATED THE SURGEON IMPLANTED A 12.6MM MICL12.6 IMPLANTABLE COLLAMER LENS, -9.5 DIOPTER, IN THE PATIENTS RIGHT EYE (OD) ON (B)(6) 2009. THE REPORTER INDICATED A CATARACT HAS DEVELOPED AND VISION IS SLOWLY CLOUDING. THE PLAN IS TO EXPLANT THE LENS BUT CURRENTLY THE LENS REMAINS IMPLANTED. ADDITIONAL INFORMATION HAS BEEN REQUESTED BUT NONE HAS BEEN FORTHCOMING. IF …	Lens Extraction	unknown
https://www.accessdata.fda.gov/scripts/cdrh/cfdocs/cfMAUDE/Detail.CFM?MDRFOI__ID=17872920&pc=MTA	2023826-2023-04387	2022-09-06	Injury	STAAR SURGICAL COMPANY	2023-10-04	MTA	IMPLANTABLE COLLAMER LENS (ICL)	Adverse Event Without Identified Device or Use Problem; Optical Problem	Cataract; Visual Disturbances	P030016	NA	1	Event Description: THE REPORTER INDICATED THAT A 13.2MM VICM513.2 IMPLANTABLE COLLAMER LENS OF -4.5 DIOPTER WAS IMPLANTED INTO THE PATIENT'S LEFT EYE (OS) ON (B)(6) 2022. ON (B)(6) 2023, THE LENS REMOVED AND REPLACED FOR A SMALLER LENGTH LENS DUE TO LENS OPACITY. THE PROBLEM WAS RESOLVED. REPORTEDLY, "QUIET ICL VAULT GOOD." Manufacturer Narrative: CORRECTED DATA: H6-HEALTH EFFECT- CLINICAL CODE: …	Lens Exchange	Resolved
https://www.accessdata.fda.gov/scripts/cdrh/cfdocs/cfMAUDE/Detail.CFM?MDRFOI__ID=7873747&pc=MTA	2023826-2018-01363	NA	Injury	STAAR SURGICAL COMPANY	2018-09-13	MTA	IMPLANTABLE COLLAMER LENS (ICL)	Inadequacy of Device Shape and/or Size	Cataract; Visual Disturbances	P030016	NA	1	Event Description: THE REPORTER INDICATED THE SURGEON IMPLANTED A 12.6MM MICL12.6 IMPLANTABLE COLLAMER LENS, -10.5 DIOPTER, ON (B)(6) 2016. THE LENS WAS REPORTED AS HAVING A SHALLOW VAULT. THE PATIENT RETURNED FOR A POST-OP VISIT A COUPLE OF WEEKS AGO WITH WORSENING VISION AND A LOT OF HAZE. THE PATIENT HAD ANTERIOR SUBCAPSULAR CATARACTS OU, OD IS WORSE THAN OS. OD IS CORRECTABLE TO 20/25 AND OS …	Lens Retention	unknown
https://www.accessdata.fda.gov/scripts/cdrh/cfdocs/cfMAUDE/Detail.CFM?MDRFOI__ID=7873772&pc=MTA	2023826-2018-01364	NA	Injury	STAAR SURGICAL COMPANY	2018-09-13	MTA	IMPLANTABLE COLLAMER LENS (ICL)	Inadequacy of Device Shape and/or Size	Cataract; Visual Disturbances	P030016	NA	1	Event Description: THE REPORTER INDICATED THE SURGEON IMPLANTED A12.6MM MICL12.6 IMPLANTABLE COLLAMER LENS, -10.5 DIOPTER, ON (B)(6) 2016. THE LENS WAS REPORTED AS HAVING A SHALLOW VAULT. THE PATIENT RETURNED FOR A POST-OP VISIT A COUPLE OF WEEKS AGO WITH WORSENING VISION AND A LOT OF HAZE. THE PATIENT HAD ANTERIOR SUBCAPSULAR CATARACTS OU, OD IS WORSE THAN OS. OD IS CORRECTABLE TO 20/25 AND OS I…	Lens Retention	Not_Resolved
https://www.accessdata.fda.gov/scripts/cdrh/cfdocs/cfMAUDE/Detail.CFM?MDRFOI__ID=6863580&pc=MTA	2023826-2017-01430	2017-08-08	Injury	STAAR SURGICAL COMPANY AG	2017-09-13	MTA	IMPLANTABLE COLLAMER LENS (ICL)	Insufficient Information	Cataract; Visual Disturbances; No Code Available	P030016	NA	1	Event Description: THE REPORTER STATED THE SURGEON IMPLANTED A 12.6MM MICL12.6 IMPLANTABLE COLLAMER LENS, -15.0 DIOPTER, ON (B)(6) 2014. THE LENS WAS EXPLANTED ON (B)(6) 2017 DUE TO A CATARACT, AND REPLACED WITH AN INTRAOCULAR LENS (IOL). ADDITIONAL INFORMATION HAS BEEN REQUESTED BUT NONE HAS BEEN FORTHCOMING. IF ADDITIONAL INFORMATION IS RECEIVED, A SUPPLEMENTAL MEDWATCH REPORT WILL BE SUBMITTED…	Lens Extraction + Secondary Operation	unknown
https://www.accessdata.fda.gov/scripts/cdrh/cfdocs/cfMAUDE/Detail.CFM?MDRFOI__ID=8362600&pc=MTA	2023826-2019-00300	NA	Injury	STAAR SURGICAL COMPANY	2019-02-22 05:00:00	MTA	IMPLANTABLE COLLAMER LENS (ICL)	Optical Problem	Cataract; Visual Disturbances; No Code Available	P030016	NA	1	Event Description: THE REPORTER INDICATED THAT THE SURGEON HAS A PATIENT WHO HAS NOT BEEN HAPPY WITH HIS VISIAN ICL. PER REPORTER, PATIENT COMPLAINS OF A WHITE BAR OR STREAK THAT COMES ACROSS HIS VISION WHEN HIS PUPIL IS DILATED. IT SEEMS TO BE TRIGGERED WHEN LOOKING AT COMPUTER SCREENS OR OUTDOOR LIGHTS. HAVE TRIED PUPIL REDUCING DROPS WITHOUT SUCCESS. PATIENT IS BOTHERED SO MUCH BY THIS HE WANT…	Lens Retention	unknown
https://www.accessdata.fda.gov/scripts/cdrh/cfdocs/cfMAUDE/Detail.CFM?MDRFOI__ID=8362754&pc=MTA	2023826-2019-00301	NA	Injury	STAAR SURGICAL COMPANY	2019-02-22 05:00:00	MTA	IMPLANTABLE COLLAMER LENS (ICL)	Optical Problem	Cataract; Visual Disturbances; No Code Available	P030016	NA	1	Event Description: THE REPORTER INDICATED THAT THE SURGEON HAS A PATIENT WHO HAS NOT BEEN HAPPY WITH HIS VISIAN ICL. PER REPORTER, PATIENT COMPLAINS OF A WHITE BAR OR STREAK THAT COMES ACROSS HIS VISION WHEN HIS PUPIL IS DILATED. IT SEEMS TO BE TRIGGERED WHEN LOOKING AT COMPUTER SCREENS OR OUTDOOR LIGHTS. HAVE TRIED PUPIL REDUCING DROPS WITHOUT SUCCESS. PATIENT IS BOTHERED SO MUCH BY THIS HE WANT…	Lens Retention	unknown
https://www.accessdata.fda.gov/scripts/cdrh/cfdocs/cfMAUDE/Detail.CFM?MDRFOI__ID=9233429&pc=MTA	2023826-2019-02023	NA	Injury	STAAR SURGICAL COMPANY	2019-10-24 04:00:00	MTA	IMPLANTABLE COLLAMER LENS (ICL)	Misfocusing; Material Opacification; Adverse Event Without Identified Device or Use Problem	Cataract; Vitreous Floaters; Retinal Detachment; Blurred Vision; Visual Disturbances; No Code Available	P030016	NA	1	Event Description: RECEIVED A VOLUNTARY EVENT REPORT FROM FDA: # MW5089673. THE PATIENT REPORTED ON (B)(6)2019, A "SERIOUS INJURY" REPORT WITH OUTCOME OF "DISABILITY/PERMANENT DAMAGE". THE PATIENT STATED "GOT VISIAN ICL PLASTIC LENS IMPLANTS IN BOTH EYES. IN LEFT EYE OVER A YEAR LATER I HAD SYMPTOMS OF FOGGY VISION, NEW FLOATERS AND TODAY MY VISION IS ALMOST GONE. THERE'S A HUGE BLOB OF WATER BLO…	Lens Extraction + Secondary Operation	Not_Resolved
