# Supplementary material for: Adverse events associated with Implantable Collamer Lens: insights from the FDA MAUDE database
Source: Front Med (Lausanne). 2025 Jul 21;12:1613060. doi: 10.3389/fmed.2025.1613060 (PMC12319018; doi:10.3389/fmed.2025.1613060)
Supplement: Supplementary file 12 [file Table_11.XLSX]

## Sheet: Vision Issue-1
Web Address...29	Report Number	Event Date	Event Type	Manufacturer	Date Received	Product Code	Brand Name	Device Problem	Patient Problem	PMA/PMN Number	Exemption Number	Number of Events	Event Text	Management	Outcomes
https://www.accessdata.fda.gov/scripts/cdrh/cfdocs/cfMAUDE/Detail.CFM?MDRFOI__ID=6153422&pc=MTA	2023826-2016-01745	NA	Injury	STAAR SURGICAL COMPANY	2016-12-07	MTA	ICL (IMPLANTABLE COLLAMER LENS)	Adverse Event Without Identified Device or Use Problem	Blurred Vision	P030016	NA	1	Event Description: THE PATIENT REPORTED THE SURGEON IMPLANTED A 13.2MM MICL13.2 IMPLANTABLE COLLAMER LENS, -9.5 DIOPTER, IN HER LEFT EYE (OS). THE PATIENT REPORTED HER VISION WAS SLIGHTLY BLURRY AT NIGHT AND IN DIM LIGHTING. THE LENS WAS IMPLANTED ON (B)(6) 2012 AND REMAINS IMPLANTED. THE FACILITY CONFIRMED THE INFORMATION AND INDICATED THE EVENT WAS DUE TO THE PATIENT HAD LARGE PUPILS AND WAS NO…	Lens Retention	Resolved
https://www.accessdata.fda.gov/scripts/cdrh/cfdocs/cfMAUDE/Detail.CFM?MDRFOI__ID=6153430&pc=MTA	2023826-2016-01744	NA	Injury	STAAR SURGICAL COMPANY	2016-12-07	MTA	ICL (IMPLANTABLE COLLAMER LENS)	Adverse Event Without Identified Device or Use Problem	Blurred Vision	P030016	NA	1	Event Description: THE PATIENT REPORTED THE SURGEON IMPLANTED A 13.2MM MICL13.2 IMPLANTABLE COLLAMER LENS, -8.5 DIOPTER, IN HER RIGHT EYE (OD). THE PATIENT REPORTED HER VISION WAS SLIGHTLY BLURRY AT NIGHT AND IN DIM LIGHTING. THE LENS WAS IMPLANTED ON (B)(6) 2010 AND REMAINS IMPLANTED. THE FACILITY CONFIRMED THE INFORMATION AND INDICATED THE EVENT WAS DUE TO THE PATIENT HAD LARGE PUPILS AND WAS N…	Lens Retention	Resolved
https://www.accessdata.fda.gov/scripts/cdrh/cfdocs/cfMAUDE/Detail.CFM?MDRFOI__ID=8887955&pc=MTA	2023826-2019-01354	NA	Injury	STAAR SURGICAL COMPANY	2019-08-13 04:00:00	MTA	IMPLANTABLE COLLAMER LENS (ICL)	Adverse Event Without Identified Device or Use Problem	Blurred Vision	P030016	NA	1	Event Description: THE REPORTER INDICATED THAT THE SURGEON IMPLANTED A 12.6MM MICL12.6, -6.5 DIOPTER, IMPLANTABLE COLLAMER LENS, INTO THE PATIENT'S EYE ON (B)(6) 2019. REPORTEDLY, "PATIENT WANTED BETTER NEAR VISION IN EYE AND SOME ASTIGMATISM WAS FOUND TO BE RELATED TO IT AS WELL." ON (B)(6) 2019 THE LENS WAS REMOVED AND EXCHANGED WITH A TORIC ICL. THIS RESOLVED THE PROBLEM. PER REPORTER ON (B)(6…	Lens Exchange	Resolved
https://www.accessdata.fda.gov/scripts/cdrh/cfdocs/cfMAUDE/Detail.CFM?MDRFOI__ID=4513718&pc=MTA	2023826-2015-00143	NA	Injury	STAAR SURGICAL COMPANY	2015-02-12	MTA	VISIAN ICL (IMPLANTABLE COLLAMER LENS)	Appropriate Term/Code Not Available	Blurred Vision	P030016	NA	1	Event Description: THE PATIENT REPORTED THE SURGEON IMPLANTED A 13.2MM MICL13.2 IMPLANTABLE COLLAMER LENS IN HER LEFT EYE (OS). THE PATIENT REPORTED THE LENS WAS EITHER REMOVED, REPLACED OR REPOSITIONED? ALSO ASTIGMATLISM IS RETURNING AND THERE IS SORENESS AND BLURRINESS. ADDITIONAL INFORMATION HAS BEEN REQUESTED BUT NONE HAS BEEN FORTHCOMING. IF ADDITIONAL INFORMATION IS RECEIVED, A SUPPLEMENTAL…	Unknown	Unknown
https://www.accessdata.fda.gov/scripts/cdrh/cfdocs/cfMAUDE/Detail.CFM?MDRFOI__ID=7213979&pc=MTA	2023826-2018-00137	2017-11-01	Malfunction	STAAR SURGICAL COMPANY	2018-01-23	MTA	IMPLANTABLE COLLAMER LENS	Device Dislodged or Dislocated	Blurred Vision	N/A	NA	1	Event Description: THE REPORTER STATED THAT THE SURGEON IMPLANTED A 12.6MM VICM12.6, -5.50 DIOPTER INTO THE PATIENT'S LEFT EYE (OS) ON (B)(6) 2014. THE SURGEON NOTES LENS ROTATION, LOSS OF BCVA, AND BLURRED VISION. REPORTEDLY, LENS REMAINS IMPLANTED. SURGEON REPORTS THE "ICL ON DEAD VERTICAL POSITION." Manufacturer Narrative: THIS PRODUCT IS NOT MARKETED IN THE U.S. (B)(4).	Lens Retention	Unknown
https://www.accessdata.fda.gov/scripts/cdrh/cfdocs/cfMAUDE/Detail.CFM?MDRFOI__ID=7205806&pc=MTA	2023826-2018-00105	2015-11-30	Malfunction	STAAR SURGICAL COMPANY	2018-01-19	MTA	IMPLANTABLE COLLAMER LENS (ICL)	Device Operates Differently Than Expected	Blurred Vision	NA	NA	1	Event Description: THE REPORTER INDICATED THAT THE SURGEON IMPLANTED A 13.2 MM VICMO13.2, -9.00 DIOPTER, IMPLANTABLE COLLAMER LENS IN THE PATIENT'S LEFT EYE (OS) ON (B)(6) 2015. REFRACTIVE SURPRISE WAS NOTICED. THE LENS REMAINS IMPLANTED IN THE EYE. ADDITIONAL INFORMATION HAS BEEN REQUESTED BUT NONE HAS BEEN FORTHCOMING. IF ADDITIONAL INFORMATION IS RECEIVED, A SUPPLEMENTAL MEDWATCH REPORT WILL B…	Lens Retention	Unknown
https://www.accessdata.fda.gov/scripts/cdrh/cfdocs/cfMAUDE/Detail.CFM?MDRFOI__ID=6366306&pc=MTA	2023826-2017-00276	2017-01-16	Injury	STAAR SURGICAL COMPANY	2017-02-28	MTA	IMPLANTABLE COLLAMER LENS	Device Operates Differently Than Expected	Blurred Vision	NA	NA	1	Event Description: THE REPORTER INDICATED THAT THE SURGEON IMPLANTED A 13.2 MM VICM5 13.2 IMPLANTABLE COLLAMER LENS, -13.50 DIOPTER, INTO THE PATIENT'S LEFT EYE (OS) ON (B)(6) 2016. ON (B)(6) 2017, THE PATIENT EXPERIENCED REFRACTIVE SURPRISE. AS OF THE DATE OF MDR SUBMISSION, THE LENS REMAINS IMPLANTED IN THE PATIENT AND THEREFORE, HAS NOT BEEN RETURNED FOR EVALUATION. Manufacturer Narrative: ON …	Lens Exchange	Resolved
https://www.accessdata.fda.gov/scripts/cdrh/cfdocs/cfMAUDE/Detail.CFM?MDRFOI__ID=6879884&pc=MTA	2023826-2017-01477	2017-08-24	Malfunction	STAAR SURGICAL COMPANY	2017-09-20	MTA	IMPLANTABLE COLLAMER LENS	Device Operates Differently Than Expected	Blurred Vision	NA	NA	1	Event Description: THE REPORTER INDICATED THAT THE SURGEON IMPLANTED A 13.2 MM VICM5_13.2 IMPLANTABLE COLLAMER LENS, -11.5 DIOPTER, INTO THE PATIENT'S LEFT EYE (OS) ON (B)(6) 2017. ON (B)(6) 2017 A REFRACTIVE SURPRISE WAS NOTED BY THE SURGEON. ON 28-08-2017, DURING THE PATIENT'S LAST REPORTED VISIT, THE UCVA WAS MEASURED AT 20/20 AND THE RX +0.25 SPH. PER THE SURGEON NO LENS EXCHANGE IS NEEDED. T…	Lens Retention	Resolved
https://www.accessdata.fda.gov/scripts/cdrh/cfdocs/cfMAUDE/Detail.CFM?MDRFOI__ID=7268465&pc=MTA	2023826-2018-00179	2018-01-15	Malfunction	STAAR SURGICAL COMPANY AG	2018-02-13	MTA	IMPLANTABLE COLLAMER LENS (ICL)	Device Operates Differently Than Expected	Blurred Vision	N/A	NA	1	Event Description: THE REPORTER INDICATED THAT THE SURGEON IMPLANTED A 13.0 MM ICM130V4, -13.5 DIOPTER, IMPLANTABLE COLLAMER LENS IN THE PATIENT'S (OS) ON (B)(6) 2001. ON (B)(6) 2018, REFRACTIVE CHANGE OVER TIME WAS NOTICED. THE SURGEON IS MAKING PLANS TO EXCHANGE THE LENS. THE REPORTER STATED THAT THE REASON FOR THE REFRACTIVE CHANGE OVER TIME WAS BECAUSE OF PENETRATING KERATOPLASTY (PKP) PERFOR…	Lens Retention	Unknown
https://www.accessdata.fda.gov/scripts/cdrh/cfdocs/cfMAUDE/Detail.CFM?MDRFOI__ID=7484263&pc=MTA	2023826-2018-00639	2018-02-01	Malfunction	STAAR SURGICAL COMPANY	2018-05-03	MTA	IMPLANTABLE COLLAMER LENS (ICL)	Device Operates Differently Than Expected	Blurred Vision	NA	NA	1	Event Description: THE REPORTER INDICATED THE SURGEON IMPLANTED A 12.1MM VICM5_12.1 IMPLANTABLE COLLAMER LENS, -2.50 DIOPTER, INTO THE PATIENT'S RIGHT EYE (OD) ON (B)(6) 2018. THE SURGEON NOTES REFRACTIVE SURPRISE. TO DATE, THE LENS REMAINS IMPLANTED. Manufacturer Narrative: THIS PRODUCT IS MANUFACTURED IN THE U.S. BUT NOT MARKETED IN THE U.S. WORK ORDER SEARCH: NO SIMILAR COMPLAINT TYPE EVENTS R…	Lens Retention	Unknown
https://www.accessdata.fda.gov/scripts/cdrh/cfdocs/cfMAUDE/Detail.CFM?MDRFOI__ID=7660090&pc=MTA	2023826-2018-01003	2018-06-04	Injury	STAAR SURGICAL COMPANY	2018-07-03	MTA	IMPLANTABLE COLLAMER LENS	Device Operates Differently Than Expected	Blurred Vision	NA	NA	1	Event Description: THE REPORTER INDICATED THAT THE SURGEON IMPLANTED A 13.2 MM VICM6_13.2 IMPLANTABLE COLLAMER LENS, -5.5 DIOPTER INTO THE PATIENT'S LEFT EYE (OS) ON (B)(6) 2018. THE SURGEON REPORTS >2-LINE DROP OF BCVA AT THE 1-MONTH POSTOPERATIVE VISIT. UPON THE REPEAT EXAM OF THE BCDVA DURING A FOLLOW UP VISIT, IT WAS DETERMINED THAT, ALTHOUGH THERE WAS A 1-LINE IMPROVEMENT IN THE BEST CORRECT…	Lens Retention	Resolved
https://www.accessdata.fda.gov/scripts/cdrh/cfdocs/cfMAUDE/Detail.CFM?MDRFOI__ID=6839063&pc=MTA	2023826-2017-01374	NA	Malfunction	STAAR SURGICAL COMPANY	2017-09-01	MTA	IMPLANTABLE COLLAMER LENS (ICL)	Device Operates Differently Than Expected	Blurred Vision	P030016	NA	1	Event Description: THE REPORTER INDICATED THAT THE SURGEON IMPLANTED AN MICL12.1, -9.5 DIOPTER, IMPLANTABLE COLLAMER LENS IN THE PATIENT'S RIGHT EYE (OD) ON (B)(6) 2017. REFRACTIVE SURPRISE WAS NOTICED AS THE PATIENT IS NOW APPROXIMATELY +1.25D SEQ POST-OP. THE SURGEON CONFIRMED THAT THE ICL IS SITTING IN THE CORRECT POSITION AND NOT INVERTED. HE ALSO VERIFIED THAT THE CYCLO WAS NOT SIGNIFICANTLY…	Unknown	Unknown
https://www.accessdata.fda.gov/scripts/cdrh/cfdocs/cfMAUDE/Detail.CFM?MDRFOI__ID=6839072&pc=MTA	2023826-2017-01375	NA	Malfunction	STAAR SURGICAL COMPANY	2017-09-01	MTA	IMPLANTABLE COLLAMER LENS (ICL)	Device Operates Differently Than Expected	Blurred Vision	P030016	NA	1	Event Description: THE REPORTER INDICATED THAT THE SURGEON IMPLANTED AN MICL12.1, -10.5 DIOPTER, IMPLANTABLE COLLAMER LENS, IN THE PATIENT'S LEFT EYE (OS) ON (B)(6) 2017. REFRACTIVE SURPRISE WAS NOTICED. THE LENS REMAINS IMPLANTED. ATTEMPTS AT OBTAINING ADDITIONAL INFORMATION HAVE BEEN UNSUCCESSFUL. Manufacturer Narrative: CLAIM# (B)(4). Manufacturer Narrative: (B)(4).	Lens Retention	Unknown
https://www.accessdata.fda.gov/scripts/cdrh/cfdocs/cfMAUDE/Detail.CFM?MDRFOI__ID=6978049&pc=MTA	2023826-2017-01625	NA	Injury	STAAR SURGICAL COMPANY	2017-10-25	MTA	IMPLANTABLE COLLAMER LENS (ICL)	Device Operates Differently Than Expected	Blurred Vision	N/A	NA	1	Event Description: THE REPORTER INDICATED THAT ON (B)(6) 2017 THE SURGEON IMPLANTED A 13.2MM VICMO13.2 IMPLANTABLE COLLAMER LENS, DIOPTER -12.00 INTO THE PATIENT'S LEFT (OS) EYE. REPORTEDLY, IMMEDIATELY AFTERWARD, THE PATIENT COMPLAINED OF A CIRCULAR "CLOUD" (BLURRED SPOT) IN HER FIELD OF VIEW JUST OFF-CENTER, ADJACENT TO HER CENTRAL VISION. THE SURGEON STATES THE "HOLE" OF THE LENS IS "VERY CLOS…	Lens Retention + Secondary Operation	Unknown
https://www.accessdata.fda.gov/scripts/cdrh/cfdocs/cfMAUDE/Detail.CFM?MDRFOI__ID=4542565&pc=MTA	2023826-2015-00174	2014-12-01	Injury	STAAR SURGICAL COMPANY	2015-02-24	MTA	ICL (IMPLANTABLE COLLAMER LENS)	Inadequacy of Device Shape and/or Size	Blurred Vision	P030016	NA	1	Event Description: THE REPORTER INDICATED THE SURGEON IMPLANTED A 13.0MM ICM130V4 IMPLANTABLE COLLAMER LENS IN THE PATIENT'S RIGHT EYE (OD) ON (B)(6) 2014. THE LENS WAS EXPLANTED ON (B)(6) 2014 DUE TO EXCESSIVE VAULTING. THE PATIENT EXPERIENCED REFRACTIVE CHANGE OVERTIME (OVERCORRECTION) AND BLURRED VISION. THE ICL WAS EXCHANGED FOR ANOTHER SAME MODEL LENS BUT A DIFFERENT DIOPTER POWER (-15.5), W…	Lens Exchange	Resolved
https://www.accessdata.fda.gov/scripts/cdrh/cfdocs/cfMAUDE/Detail.CFM?MDRFOI__ID=7180685&pc=MTA	2023826-2018-00036	2017-12-11	Malfunction	STAAR SURGICAL COMPANY	2018-01-10	MTA	IMPLANTABLE COLLAMER LENS (ICL)	Inadequacy of Device Shape and/or Size	Blurred Vision	N/A	NA	1	Event Description: THE REPORTER INDICATED THE SURGEON IMPLANTED A 12.0MM ICM120V4 IMPLANTABLE COLLAMER LENS, DIOPTER -13.0 INTO THE PATIENT'S LEFT EYE (OS) ON (B)(6) 2008. THE SURGEON REPORTS LOW VAULT AND REFRACTIVE SURPRISE; INCIDENT DATE OF (B)(6) 2017. Manufacturer Narrative: THE PRODUCT IS MANUFACTURED IN THE US, BUT NOT MARKETED IN THE US. CONCLUSION CODE: OFF-LABEL USE [UNDER 21 YEARS OF A…	Unknown	Unknown
https://www.accessdata.fda.gov/scripts/cdrh/cfdocs/cfMAUDE/Detail.CFM?MDRFOI__ID=7180690&pc=MTA	2023826-2018-00037	2017-12-11	Malfunction	STAAR SURGICAL COMPANY	2018-01-10	MTA	IMPLANTABLE COLLAMER LENS (ICL)	Inadequacy of Device Shape and/or Size	Blurred Vision	N/A	NA	1	Event Description: THE REPORTER INDICATED THE SURGEON IMPLANTED A 11.5MM ICM115V4 IMPLANTABLE COLLAMER LENS, DIOPTER -12.0 INTO THE PATIENT'S RIGHT EYE (OD) ON (B)(6) 2008. THE SURGEON REPORTS LOW VAULT AND REFRACTIVE SURPRISE; INCIDENT DATE OF (B)(6) 2017. Manufacturer Narrative: CORRECTED INFORMATION: THE LENS REMAINS IMPLANTED. THE LENS IS PLANNED TO BE EXCHANGED. CLAIM# (B)(4). Manufacturer N…	Lens Retention	Unknown
https://www.accessdata.fda.gov/scripts/cdrh/cfdocs/cfMAUDE/Detail.CFM?MDRFOI__ID=10524328&pc=MTA	2023826-2020-02041	2020-08-03	Injury	STAAR SURGICAL COMPANY	2020-09-11	MTA	IMPLANTABLE COLLAMER LENS (ICL)	Inadequacy of Device Shape and/or Size	Blurred Vision	N/A#S-P#N/A	NA	1	Event Description: THE REPORTER INDICATED THAT A 12.6MM, VICM5_12.6, -4.00, IMPLANTABLE COLLAMER LENS WAS IMPLANTED INTO THE PATIENT'S RIGHT EYE (OD) ON (B)(6) 2017. LOW VAULT AND REFRACTIVE CHANGE OVER TIME WERE REPORTED. THE LENS REMAINS IMPLANTED. Manufacturer Narrative: B5-UPDATED INFORMATION: ON (B)(6) 2020 THE LENS WAS EXCHANGED WITH A LONGER LENS AND PROBLEM WAS RESOLVED. CLAIM# (B)(4). Ma…	Lens Exchange	Resolved
https://www.accessdata.fda.gov/scripts/cdrh/cfdocs/cfMAUDE/Detail.CFM?MDRFOI__ID=10524391&pc=MTA	2023826-2020-02040	2020-08-03	Injury	STAAR SURGICAL COMPANY	2020-09-11	MTA	IMPLANTABLE COLLAMER LENS (ICL)	Inadequacy of Device Shape and/or Size	Blurred Vision	N/A#S-P#N/A	NA	1	Event Description: THE REPORTER INDICATED THAT A 12.6MM, VICM5_12.6, -4.50, IMPLANTABLE COLLAMER LENS WAS IMPLANTED INTO THE PATIENT'S LEFT EYE (OS) ON (B)(6) 2017. LOW VAULT AND REFRACTIVE CHANGE OVER TIME WERE REPORTED. THE LENS REMAINS IMPLANTED. Manufacturer Narrative: B5-UPDATED INFORMATION: ON (B)(6) 2020 THE LENS WAS EXCHANGED WITH A LONGER LENS AND THE PROBLEM WAS RESOLVED. CLAIM# (B)(4).…	Lens Exchange	Resolved
https://www.accessdata.fda.gov/scripts/cdrh/cfdocs/cfMAUDE/Detail.CFM?MDRFOI__ID=16030056&pc=MTA	2023826-2022-04436	2021-04-08	Injury	STAAR SURGICAL COMPANY	2022-12-21	MTA	IMPLANTABLE COLLAMER LENS (ICL)	Inadequacy of Device Shape and/or Size	Blurred Vision	P030016	NA	1	Event Description: THE REPORTER INDICATED THAT A 12.6MM VICMO12.6 IMPLANTABLE COLLAMER LENS -8.00 DIOPTER WAS IMPLANTED INTO THE PATIENT'S LEFT EYE (OS) ON (B)(6) 2019. ON (B)(6) 2021 THE LENS WAS EXCHANGED FOR A LONGER LENGTH LENS OF DIFFERENT POWER DUE TO LOW VAULT AND REFRACTIVE SURPRISE. THIS EXCHANGED RESOLVED THE PROBLEM. CAUSE OF EVENT WAS UNKNOWN. Manufacturer Narrative: LENS WORK ORDER S…	Lens Exchange	Resolved
https://www.accessdata.fda.gov/scripts/cdrh/cfdocs/cfMAUDE/Detail.CFM?MDRFOI__ID=12029739&pc=MTA	2023826-2021-01917	2021-05-17	Injury	STAAR SURGICAL COMPANY	2021-06-19	MTA	IMPLANTABLE COLLAMER LENS (ICL)	Inadequacy of Device Shape and/or Size	Blurred Vision	NA	NA	1	Event Description: THE REPORTER INDICATED THAT A 12.6MM, VICM5_12.6, -3.50 DIOPTER, IMPLANTABLE COLLAMER LENS WAS IMPLANTED INTO THE PATIENTS LEFT EYE (OS) ON (B)(6) 2020. LOW VAULT AND REFRACTIVE CHANGE OVERTIME WAS OBSERVED. LENS REMAINS IMPLANTED. IF ADDITIONAL INFORMATION IS RECEIVED A SUPPLEMENTAL MEDWATCH REPORT WILL BE SUBMITTED. Manufacturer Narrative: B5- THE REPORTER INDICATED THAT A 12…	Lens Exchange	Resolved
https://www.accessdata.fda.gov/scripts/cdrh/cfdocs/cfMAUDE/Detail.CFM?MDRFOI__ID=17592022&pc=MTA	2023826-2023-03621	2023-07-19	Injury	STAAR SURGICAL COMPANY	2023-08-21	MTA	IMPLANTABLE COLLAMER LENS (ICL)	Inadequacy of Device Shape and/or Size; Patient-Device Incompatibility	Blurred Vision	P030016	NA	1	Event Description: THE REPORTER INDICATED THAT A 12.6MM VICMO12.6 IMPLANTABLE COLLAMER LENS OF -11.0 DIOPTER WAS IMPLANTED INTO THE PATIENT'S RIGHT EYE (OD) ON (B)(6) 2023. IN A SUBSEQUENT SURGERY LATER THAT DAY, THE LENS WAS EXCHANGED FOR A LONGER LENGTH LENS DUE LOW VAULT WITHOUT ROTATION. THE PROBLEM WAS RESOLVED. CAUSE OF THE EVENT WAS A PATIENT RELATED FACTOR. Manufacturer Narrative: CORRECT…	Lens Exchange	Resolved
https://www.accessdata.fda.gov/scripts/cdrh/cfdocs/cfMAUDE/Detail.CFM?MDRFOI__ID=15784581&pc=MTA	2023826-2022-04080	2018-03-27	Injury	STAAR SURGICAL COMPANY	2022-11-11	MTA	IMPLANTABLE COLLAMER LENS (ICL)	Misfocusing	Blurred Vision	P030016	NA	1	Event Description: THE REPORTER INDICATED THE SURGEON IMPLANTED A 12.6MM MICL12.6 IMPLANTABLE COLLAMER LENS, -06.50 DIOPTER, IN THE PATIENTS LEFT EYE (OS) ON (B)(6) 2018. THE PATIENT EXPERIENCED A REFRACTIVE SURPRISE AND BLURRED VISION. THE CAUSE OF THE EVENT WAS DUE TO THE DEVICE. ADDITIONAL INFORMATION HAS BEEN REQUESTED BUT NONE HAS BEEN FORTHCOMING. Manufacturer Narrative: (B)(4). CLAIM # (B)…	Lens Exchange	Resolved
https://www.accessdata.fda.gov/scripts/cdrh/cfdocs/cfMAUDE/Detail.CFM?MDRFOI__ID=11823161&pc=MTA	2023826-2021-01483	2018-04-02	Injury	STAAR SURGICAL COMPANY	2021-05-13	MTA	IMPLANTABLE COLLAMER LENS	Misfocusing	Blurred Vision	NA	NA	1	Event Description: THE REPORTER INDICATED THAT THE SURGEON IMPLANTED A 13.2MM VICMO13.2 IMPLANTABLE COLLAMER LENS, -11.5 DIOPTER, INTO THE PATIENT'S LEFT EYE (OS) ON (B)(6) 2017. ON (B)(6) 2018 THE LENS WAS EXCHANGED WITH A SAME SIZE DIFFERENT DIOPTER LENS DUE TO REFRACTIVE SURPRISE. THE PROBLEM WAS RESOLVED. THE CAUSE OF THE EVENT IS REPORTED AS UNKNOWN. Manufacturer Narrative: PMA/510(K): THIS …	Lens Exchange	Resolved
https://www.accessdata.fda.gov/scripts/cdrh/cfdocs/cfMAUDE/Detail.CFM?MDRFOI__ID=11751185&pc=MTA	2023826-2021-01281	2018-04-28	Injury	STAAR SURGICAL COMPANY	2021-04-30	MTA	IMPLANTABLE COLLAMER LENS (ICL)	Misfocusing	Blurred Vision	NA	NA	1	Event Description: THE REPORTER INDICATED THAT A 13.2MM, VICMO13.2, -11.00 DIOPTER, IMPLANTABLE COLLAMER LENS WAS IMPLANTED INTO THE PATIENTS LEFT EYE (OS) ON (B)(6) 2017. ON (B)(6) 2018 THE LENS WAS EXCHANGED FOR A DIFFERENT MODEL AND DIOPTER LENS DUE TO REFRACTIVE SURPRISE. THIS EXCHANGE RESOLVED THE PROBLEM. CAUSE OF EVENT WAS REPORTER AS UNKNOWN. Manufacturer Narrative: ADDITIONAL INFORMATION…	Lens Exchange	Resolved
https://www.accessdata.fda.gov/scripts/cdrh/cfdocs/cfMAUDE/Detail.CFM?MDRFOI__ID=7696925&pc=MTA	2023826-2018-01042	2018-06-18	Injury	STAAR SURGICAL COMPANY	2018-07-17	MTA	IMPLANTABLE COLLAMER LENS	Misfocusing	Blurred Vision	NA	NA	1	Event Description: THE REPORTER INDICATED THAT THE SURGEON IMPLANTED A 13.2MM VICM6_13.2 IMPLANTABLE COLLAMER LENS, -5.5 DIOPTER INTO THE PATIENT'S RIGHT EYE (OD) ON (B)(6) 2018. THE SURGEON REPORTS A 2-LINE DROP IN BCDVA COMPARED TO THE PREOPERATIVE EXAM. THE LENS REMAINS IMPLANTED AND THE INVESTIGATION IS ONGOING. Manufacturer Narrative: ADDITIONAL INFORMATION: IN THE SURGEON'S OPINION, THE CAU…	Lens Retention	Resolved
https://www.accessdata.fda.gov/scripts/cdrh/cfdocs/cfMAUDE/Detail.CFM?MDRFOI__ID=7799794&pc=MTA	2023826-2018-01251	2018-07-26	Injury	STAAR SURGICAL COMPANY	2018-08-20	MTA	IMPLANTABLE COLLAMER LENS	Misfocusing	Blurred Vision	NA	NA	1	Event Description: THE REPORTER INDICATED THAT THE SURGEON IMPLANTED A 13.2MM VICM6_13.2 IMPLANTABLE COLLAMER LENS, -4.5 DIOPTER INTO THE PATIENT'S LEFT EYE (OS) ON (B)(6) 2018. REPORTEDLY, THERE WAS A >/= 2-LINE DROP IN BCDVA NOTED AT THE PATIENT'S 1-MONTH POSTOPERATIVE VISIT. IN THE SURGEON'S OPINION, THE CAUSE OF THIS EVENT IS THE DEVICE. AT THE PATIENT'S LAST VISIT THE SURGEON STATES THERE IS…	Lens Retention	Resolved
https://www.accessdata.fda.gov/scripts/cdrh/cfdocs/cfMAUDE/Detail.CFM?MDRFOI__ID=11351020&pc=MTA	2023826-2021-00491	2018-08-01	Injury	STAAR SURGICAL COMPANY	2021-02-19	MTA	IMPLANTABLE COLLAMER LENS (ICL)	Misfocusing	Blurred Vision	NA	NA	1	Event Description: THE REPORTER INDICATED THAT A 13.7MM, VICMO13.7 -14.50 DIOPTER, IMPLANTABLE COLLAMER LENS WAS IMPLANTED INTO THE PATIENTS LEFT EYE (OS) ON (B)(6) 2018. ON (B)(6) 2018 THE LENS WAS EXCHANGED FOR A DIFFERENT DIOPTER LENS DUE TO REFRACTIVE SURPRISE. THIS EXCHANGE RESOLVED THE PROBLEM. CAUSE OF EVENT WAS REPORTED AS UNKNOWN. Manufacturer Narrative: THIS PRODUCT IS NOT MARKETED IN T…	Lens Exchange	Resolved
https://www.accessdata.fda.gov/scripts/cdrh/cfdocs/cfMAUDE/Detail.CFM?MDRFOI__ID=11351101&pc=MTA	2023826-2021-00492	2018-08-01	Injury	STAAR SURGICAL COMPANY	2021-02-19	MTA	IMPLANTABLE COLLAMER LENS (ICL)	Misfocusing	Blurred Vision	NA	NA	1	Event Description: THE REPORTER INDICATED THAT A 13.7MM, VICMO13.7 -13.00 DIOPTER, IMPLANTABLE COLLAMER LENS WAS IMPLANTED INTO THE PATIENTS RIGHT EYE (OD) ON (B)(6) 2018. ON (B)(6) 2018 THE LENS WAS EXCHANGED FOR A DIFFERENT DIOPTER LENS DUE TO REFRACTIVE SURPRISE. THIS EXCHANGE RESOLVED THE PROBLEM. CAUSE OF EVENT WAS REPORTED AS UNKNOWN. Manufacturer Narrative: THIS PRODUCT IS NOT MARKETED IN …	Lens Exchange	Resolved
https://www.accessdata.fda.gov/scripts/cdrh/cfdocs/cfMAUDE/Detail.CFM?MDRFOI__ID=11721899&pc=MTA	2023826-2021-01018	2018-08-04	Injury	STAAR SURGICAL COMPANY	2021-04-25	MTA	IMPLANTABLE COLLAMER LENS (ICL)	Misfocusing	Blurred Vision	N/A	NA	1	Event Description: THE REPORTER INDICATED THAT THE SURGEON IMPLANTED A 12.6MM VICMO12.6, -09.00 DIOPTER, IMPLANTABLE COLLAMER LENS INTO THE PATIENT'S LEFT EYE (OS) ON (B)(6) 2018. THE LENS WAS EXCHANGED WITH A FOR A SAME LENGTH TORIC LENS DUE TO REFRACTIVE SURPRISE ON (B)(6) 2018. THIS RESOLVED THE PROBLEM. CAUSE OF THE EVENT IS REPORTED AS UNKNOWN. Manufacturer Narrative: DEVICE EVALUATION: THE …	Lens Exchange	Resolved
https://www.accessdata.fda.gov/scripts/cdrh/cfdocs/cfMAUDE/Detail.CFM?MDRFOI__ID=8452978&pc=MTA	2023826-2019-00489	2018-10-02	Malfunction	STAAR SURGICAL COMPANY	2019-03-26	MTA	IMPLANTABLE COLLAMER LENS	Misfocusing	Blurred Vision	NA	NA	1	Event Description: THE REPORTER INDICATED THAT THE SURGEON IMPLANTED A 13.2MM VICM5_13.2 IMPLANTABLE COLLAMER LENS, -4.0 DIOPTER INTO THE PATIENT'S RIGHT EYE (OD) ON (B)(6) 2018. THE SURGEON REPORTS REFRACTIVE SURPRISE. THE CAUSE OF THE EVENT IS REPORTED AS UNKNOWN. REPORTEDLY, THE LENS REMAINS IMPLANTED. Manufacturer Narrative: PRODUCT IS MANUFACTURED BUT NOT SOLD IN THE U.S. LENS WORK ORDER SEA…	Lens Retention	Unknown
https://www.accessdata.fda.gov/scripts/cdrh/cfdocs/cfMAUDE/Detail.CFM?MDRFOI__ID=11721905&pc=MTA	2023826-2021-01025	2018-10-14	Injury	STAAR SURGICAL COMPANY	2021-04-25	MTA	IMPLANTABLE COLLAMER LENS (ICL)	Misfocusing	Blurred Vision	N/A	NA	1	Event Description: THE REPORTER INDICATED THAT THE SURGEON IMPLANTED A 12.6MM VICMO12.6, -08.50 DIOPTER, IMPLANTABLE COLLAMER LENS INTO THE PATIENT'S LEFT EYE (OS) ON (B)(6) 2017. THE LENS WAS REPLACED WITH A LONGER LENGTH LENS DUE TO REFRACTIVE CHANGE OVER TIME ON (B)(6) 2019. THIS RESOLVED THE PROBLEM.CAUSE OF THE EVENT IS REPORTED AS UNKNOWN. Manufacturer Narrative: WEIGHT: UNK. ETHNICITY: UNK…	Lens Exchange	Resolved
https://www.accessdata.fda.gov/scripts/cdrh/cfdocs/cfMAUDE/Detail.CFM?MDRFOI__ID=11351898&pc=MTA	2023826-2021-00494	2019-03-01	Injury	STAAR SURGICAL COMPANY	2021-02-19	MTA	IMPLANTABLE COLLAMER LENS (ICL)	Misfocusing	Blurred Vision	NA	NA	1	Event Description: THE REPORTER INDICATED THAT A 12.6MM, VICMO12.6 -9.50 DIOPTER, IMPLANTABLE COLLAMER LENS WAS IMPLANTED INTO THE PATIENTS RIGHT EYE (OD) ON (B)(6) 2019. ON (B)(6) 2019. THE LENS WAS EXCHANGED FOR A DIFFERENT DIOPTER AND LENGTH LENS DUE TO REFRACTIVE SURPRISE. THIS EXCHANGE RESOLVED THE PROBLEM. CAUSE OF EVENT WAS REPORTED AS UNKNOWN. Manufacturer Narrative: H3 - DEVICE EVALUATIO…	Lens Exchange	Resolved
https://www.accessdata.fda.gov/scripts/cdrh/cfdocs/cfMAUDE/Detail.CFM?MDRFOI__ID=8740571&pc=MTA	2023826-2019-01152	2019-03-22	Malfunction	STAAR SURGICAL COMPANY	2019-06-27	MTA	IMPLANTABLE COLLAMER LENS (ICL)	Misfocusing	Blurred Vision	NA	NA	1	Event Description: THE REPORTER INDICATED THE SURGEON IMPLANTED A 13.2MM VICM5_13.2 IMPLANTABLE COLLAMER LENS, - 08.00 DIOPTER IN THE PATIENT'S LEFT EYE (OS), ON (B)(6) 2019. THE PATIENT EXPERIENCED A REFRACTIVE SURPRISE. THE LENS REMAINS IMPLANTED. ADDITIONAL INFORMATION HAS BEEN REQUESTED BUT NONE HAS BEEN FORTHCOMING. IF ADDITIONAL INFORMATION IS RECEIVED, A SUPPLEMENTAL MEDWATCH WILL BE SUBMI…	Lens Retention	Unknown
https://www.accessdata.fda.gov/scripts/cdrh/cfdocs/cfMAUDE/Detail.CFM?MDRFOI__ID=8764776&pc=MTA	2023826-2019-01147	2019-04-04	Injury	STAAR SURGICAL COMPANY	2019-07-05	MTA	IMPLANTABLE COLLAMER LENS (ICL)	Misfocusing	Blurred Vision	N/A	NA	1	Event Description: THE REPORTER INDICATED THAT A 12.1 MM, VICM5_12.1, -5.0 DIOPTER, IMPLANTABLE COLLAMER LENS WAS IMPLANTED INTO THE PATIENTS LEFT EYE (OS) ON (B)(6) 2019. ON (B)(6) 2019 THE LENS WAS EXCHANGED FOR A DIFFERENT DIOPTER LENS. THIS EXCHANGE RESOLVED THE PROBLEM. Manufacturer Narrative: FILLED IN KNOWN LOT NUMBERS. CONCLUSION CODE 4310: DIMENSIONAL AND FUNCTIONAL INSPECTION FOUND THE …	Lens Exchange	Resolved
https://www.accessdata.fda.gov/scripts/cdrh/cfdocs/cfMAUDE/Detail.CFM?MDRFOI__ID=11322922&pc=MTA	2023826-2021-00422	2019-05-06	Injury	STAAR SURGICAL COMPANY	2021-02-12	MTA	IMPLANTABLE COLLAMER LENS (ICL)	Misfocusing	Blurred Vision	NA	NA	1	Event Description: THE REPORTER INDICATED THAT A 12.6MM, VIICMO12.6, -16.0 DIOPTER, IMPLANTABLE COLLAMER LENS WAS IMPLANTED INTO THE PATIENTS RIGHT EYE (OD) ON (B)(6) 2018. ON (B)(6) 2019 THE LENS EXCHANGED FOR A DIFFERENT DIOPTER LENS DUE TO REFRACTIVE SURPRISE. THIS EXCHANGE RESOLVED THE PROBLEM. CAUSE OF THE EVENT WAS REPORTER AS UNKNOWN. Manufacturer Narrative: H3 - DEVICE EVALUATION: THE LEN…	Lens Exchange	Resolved
https://www.accessdata.fda.gov/scripts/cdrh/cfdocs/cfMAUDE/Detail.CFM?MDRFOI__ID=8846158&pc=MTA	2023826-2019-01210	2019-06-04	Injury	STAAR SURGICAL COMPANY	2019-07-31	MTA	IMPLANTABLE COLLAMER LENS (ICL)	Misfocusing	Blurred Vision	N/A	NA	1	Event Description: THE REPORTER INDICATED THAT A 12.6MM, VICM5_12.6, -11.00 DIOPTER, IMPLANTABLE COLLAMER LENS WAS IMPLANTED INTO THE PATIENT'S LEFT EYE (OS) ON (B)(6) 2019. REFRACTIVE SURPRISE WAS OBSERVED, THE LENS WAS REMOVED ON (B)(6) 2019. REPORTEDLY, "PATIENT WANTS TO WAIT AND WEAR GLASSES AGAIN." Manufacturer Narrative: LENS RETURNED TO MANUFACTURER IN PREVIOUS MDR IS INCORECT. THE CORRECT…	Lens Extraction	Unknown
https://www.accessdata.fda.gov/scripts/cdrh/cfdocs/cfMAUDE/Detail.CFM?MDRFOI__ID=9492339&pc=MTA	2023826-2019-02405	2019-11-05	Injury	STAAR SURGICAL COMPANY	2019-12-19	MTA	IMPLANTABLE COLLAMER LENS (ICL)	Misfocusing	Blurred Vision	NA	NA	1	Event Description: THE REPORTER INDICATED THE SURGEON IMPLANTED A 12.1MM VICM5_12.1 IMPLANTABLE COLLAMER LENS, -03.50 DIOPTER, IN THE PATIENTS LEFT EYE (OS), ON (B)(6) 2019. THE PATIENT EXPERIENCED A REFRACTIVE SURPRISE AND THE LENS REMAINS IMPLANTED. THE SURGEON PLANS TO EXPLANT AND EXCHANGE THE LENS. Manufacturer Narrative: ADDITIONAL INFORMATION: B5- "LENS WAS EXCHANGED ON (B)(6) 2020 WITH A L…	Lens Exchange	Resolved
https://www.accessdata.fda.gov/scripts/cdrh/cfdocs/cfMAUDE/Detail.CFM?MDRFOI__ID=9814218&pc=MTA	2023826-2020-00408	2020-02-19	Injury	STAAR SURGICAL COMPANY	2020-03-10	MTA	IMPLANTABLE COLLAMER LENS (ICL)	Misfocusing	Blurred Vision	P030016	NA	1	Event Description: THE REPORTER INDICATED THE SURGEON IMPLANTED A 13.2MM MICL13.2 IMPLANTABLE COLLAMER LENS, -9.00 DIOPTER, IN THE PATIENTS RIGHT EYE (OD) ON (B)(6) 2020 AS A REPLACEMENT LENS, SEE MFR REPORT # 2023826-2020-00407 FOR INITIAL LENS. THE REPORTER INDICATED POST-OP, THE PATIENT HAD LOSS OF VISUAL ACUITY. TO DATE, THE BCVA HAS NOT INCREASED BUT VAULT IS BETTER. THE LENS REMAINED IMPLAN…	Lens Retention	Unknown
https://www.accessdata.fda.gov/scripts/cdrh/cfdocs/cfMAUDE/Detail.CFM?MDRFOI__ID=9988384&pc=MTA	2023826-2020-00955	2020-03-30	Malfunction	STAAR SURGICAL COMPANY	2020-04-22	MTA	IMPLANTABLE COLLAMER LENS (ICL)	Misfocusing	Blurred Vision	NA	NA	1	Event Description: THE REPORTER INDICATED THE SURGEON IMPLANTED A 13.2MM VICM5_13.2 IMPLANTABLE COLLAMER LENS, -06.50 DIOPTER, IN THE PATIENTS LEFT EYE (OS), ON (B)(6) 2020. THE LENS WAS IMPLANTED AS AN EXCHANGE LENS AND IT WAS UNKNOWN IF THE PROBLEM WAS RESOLVED, IF THE PATIENT STILL EXPERIENCED A REFRACTIVE SURPRISE. SEE MFR REPORT # 2023826-2020-00954 FOR THE INITIAL LENS. THE CAUSE OF THE EVE…	Lens Retention	Unknown
https://www.accessdata.fda.gov/scripts/cdrh/cfdocs/cfMAUDE/Detail.CFM?MDRFOI__ID=10002861&pc=MTA	2023826-2020-00977	2020-04-01	Injury	STAAR SURGICAL COMPANY	2020-04-27	MTA	IMPLANTABLE COLLAMER LENS (ICL)	Misfocusing	Blurred Vision	NA	NA	1	Event Description: THE REPORTER INDICATED THAT THE SURGEON IMPLANTED A 12.6MM VICM5_12.6 IMPLANTABLE COLLAMER LENS, DIOPTER -2.25 INTO THE PATIENT'S LEFT EYE (OS) ON (B)(6) 2019. THE SURGEON NOTES REFRACTIVE SURPRISE. REPORTEDLY THE LENS REMAINS IMPLANTED. THE CAUSE OF THE EVENT IS REPORTED AS UNKNOWN. Manufacturer Narrative: B5: ON (B)(6) 2021; THE LENS WAS REMOVED AND A SAME MODEL; SAME LENGTH …	Lens Exchange	Resolved
https://www.accessdata.fda.gov/scripts/cdrh/cfdocs/cfMAUDE/Detail.CFM?MDRFOI__ID=13459229&pc=MTA	2023826-2022-00385	2020-04-16	Injury	STAAR SURGICAL COMPANY	2022-02-04	MTA	IMPLANTABLE COLLAMER LENS	Misfocusing	Blurred Vision	NA	NA	1	Event Description: THE REPORTER INDICATED THAT THE SURGEON IMPLANTED A 13.2MM VICMO13.2 IMPLANTABLE COLLAMER LENS -6.5 DIOPTER INTO THE PATIENT'S RIGHT EYE (OD) ON (B)(6) 2020. ON (B)(6) 2020 THE LENS WAS EXCHANGED WITH A SAME SIZE DIFFERENT DIOPTER LENS DUE TO REFRACTIVE SURPRISE. THE PROBLEM WAS RESOLVED. THE CAUSE OF THE EVENT IS REPORTED AS UNKNOWN. Manufacturer Narrative: WEIGHT, RACE, ETHNI…	Lens Exchange	Resolved
https://www.accessdata.fda.gov/scripts/cdrh/cfdocs/cfMAUDE/Detail.CFM?MDRFOI__ID=11453113&pc=MTA	2023826-2021-00603	2020-05-28	Injury	STAAR SURGICAL COMPANY	2021-03-10	MTA	IMPLANTABLE COLLAMER LENS (ICL)	Misfocusing	Blurred Vision	N/A	NA	1	Event Description: THE REPORTER INDICATED THAT A 12.1MM, VICMO 12.1, -05.50 DIOPTER, IMPLANTABLE COLLAMER LENS WAS IMPLANTED INTO THE PATIENT'S LEFT EYE (OS) ON (B)(6) 2019. ON (B)(6) 2020 THE LENS WAS EXCHANGED WITH A SAME LENGTH TORIC LENS ( -6.00/1.0/082 (SPHERE/CYLINDER/AXIS)) LENS DUE TO REFRACTIVE SURPRISE. THE PROBLEM WAS RESOLVED. CAUSE OF THE EVENT IS REPORTED AS UNKNOWN. Manufacturer Na…	Lens Exchange	Resolved
https://www.accessdata.fda.gov/scripts/cdrh/cfdocs/cfMAUDE/Detail.CFM?MDRFOI__ID=10577512&pc=MTA	2023826-2020-02194	2020-05-30	Injury	STAAR SURGICAL COMPANY	2020-09-23	MTA	IMPLANTABLE COLLAMER LENS	Misfocusing	Blurred Vision	NA	NA	1	Event Description: THE REPORTER INDICATED THAT THE SURGEON IMPLANTED A 12.6MM VICM5_12.6 IMPLANTABLE COLLAMER LENS, -4.0 DIOPTER INTO THE PATIENT'S RIGHT EYE (OD) ON (B)(6) 2020. REPORTEDLY, THE LENS WAS EXPLANTED ON (B)(6) 2020. ON (B)(6) 2020 THE LENS WAS REPLACED WITH A SAME SIZE, DIFFERENT DIOPTER LENS DUE TO REFRACTIVE SURPRISE. THE PROBLEM WAS RESOLVED. THE CAUSE OF THE EVENT IS REPORTED AS…	Lens Exchange	Resolved
https://www.accessdata.fda.gov/scripts/cdrh/cfdocs/cfMAUDE/Detail.CFM?MDRFOI__ID=11098617&pc=MTA	2023826-2020-03256	2020-06-24	Injury	STAAR SURGICAL COMPANY	2020-12-30	MTA	IMPLANTABLE COLLAMER LENS	Misfocusing	Blurred Vision	N/A	NA	1	Event Description: THE REPORTER INDICATED THAT THE SURGEON IMPLANTED A 12.6MM VICM5_12.6 IMPLANTABLE COLLAMER LENS, -10.0 DIOPTER INTO THE PATIENT'S LEFT EYE (OS) ON (B)(6) 2020. ON (B)(6) 2020 THE LENS WAS EXCHANGED FOR A SAME SIZE, DIFFERENT MODEL LENS DUE TO REFRACTIVE SURPRISE. THE PROBLEM WAS RESOLVED. THE CAUSE OF THE EVENT IS REPORTED AS A PATIENT-RELATED FACTOR. Manufacturer Narrative: AD…	Lens Exchange	Resolved
https://www.accessdata.fda.gov/scripts/cdrh/cfdocs/cfMAUDE/Detail.CFM?MDRFOI__ID=11098631&pc=MTA	2023826-2020-03255	2020-06-24	Injury	STAAR SURGICAL COMPANY	2020-12-30	MTA	IMPLANTABLE COLLAMER LENS	Misfocusing	Blurred Vision	N/A	NA	1	Event Description: THE REPORTER INDICATED THAT THE SURGEON IMPLANTED A 12.6MM VICM5_12.6 IMPLANTABLE COLLAMER LENS, -11.0 DIOPTER INTO THE PATIENT'S RIGHT EYE (OD) ON (B)(6) 2020. ON (B)(6) 2020 THE LENS WAS EXCHANGED FOR A SAME SIZE, DIFFERENT MODEL LENS DUE TO REFRACTIVE SURPRISE. THE PROBLEM WAS RESOLVED. THE CAUSE OF THE EVENT IS REPORTED AS A PATIENT-RELATED FACTOR. Manufacturer Narrative: A…	Lens Exchange	Resolved
https://www.accessdata.fda.gov/scripts/cdrh/cfdocs/cfMAUDE/Detail.CFM?MDRFOI__ID=12171163&pc=MTA	2023826-2021-02584	2020-07-01	Injury	STAAR SURGICAL COMPANY	2021-07-15	MTA	IMPLANTABLE COLLAMER LENS (ICL)	Misfocusing	Blurred Vision	NA	NA	1	Event Description: THE REPORTER INDICATED THAT A 12.6MM, VICMO12.6, -8.5 DIOPTER, IMPLANTABLE COLLAMER LENS WAS IMPLANTED INTO THE PATIENTS RIGHT EYE (OD) ON (B)(6) 2020. ON (B)(6) 2020 THE LENS WAS EXCHANGED FOR A DIFFERENT MODEL AND DIOPTER LENS DUE TO REFRACTIVE CHANGE OVERTIME. THIS EXCHANGE RESOLVED THE PROBLEM. CAUSE OF EVENT WAS UNKNOWN. Manufacturer Narrative: PT INFO: UNK. PMA/510K: THIS…	Lens Exchange	Resolved
https://www.accessdata.fda.gov/scripts/cdrh/cfdocs/cfMAUDE/Detail.CFM?MDRFOI__ID=12148282&pc=MTA	2023826-2021-02429	2020-07-20	Injury	STAAR SURGICAL COMPANY	2021-07-11	MTA	IMPLANTABLE COLLAMER LENS	Misfocusing	Blurred Vision	NA	NA	1	Event Description: THE REPORTER INDICATED THAT THE SURGEON IMPLANTED A 13.7MM VICMO13.7 IMPLANTABLE COLLAMER LENS, -6.5 DIOPTER, INTO THE PATIENT'S RIGHT EYE (OD) ON (B)(6) 2020. REPORTEDLY, THE LENS WAS EXPLANTED AND REPLACED ON (B)(6) 2020 WITH A SAME SIZE DIFFERENT DIOPTER LENS DUE TO REFRACTIVE SURPRISE. THE PROBLEM WAS RESOLVED. THE CAUSE OF THE EVENT IS REPORTED AS DEVICE. Manufacturer Narr…	Lens Exchange	Resolved
https://www.accessdata.fda.gov/scripts/cdrh/cfdocs/cfMAUDE/Detail.CFM?MDRFOI__ID=11620598&pc=MTA	2023826-2021-00877	2020-07-24	Injury	STAAR SURGICAL COMPANY	2021-04-06	MTA	IMPLANTABLE COLLAMER LENS	Misfocusing	Blurred Vision	NA	NA	1	Event Description: THE REPORTER INDICATED THAT THE SURGEON IMPLANTED A 13.2MM VICMO13.2 IMPLANTABLE COLLAMER LENS, -9.0 DIOPTER, INTO THE PATIENT'S LEFT EYE (OS) ON (B)(6) 2020. REPORTEDLY, THE LENS WAS EXCHANGED ON (B)(6) 2020 WITH A SHORTER LENGTH DIFFERENT MODEL LENS DUE TO REFRACTIVE SURPRISE. THE PROBLEM WAS RESOLVED. THE CAUSE OF THE EVENT IS REPORTED AS UNKNOWN. Manufacturer Narrative: H3 …	Lens Exchange	Resolved
https://www.accessdata.fda.gov/scripts/cdrh/cfdocs/cfMAUDE/Detail.CFM?MDRFOI__ID=11620605&pc=MTA	2023826-2021-00876	2020-07-24	Injury	STAAR SURGICAL COMPANY	2021-04-06	MTA	IMPLANTABLE COLLAMER LENS	Misfocusing	Blurred Vision	NA	NA	1	Event Description: THE REPORTER INDICATED THAT THE SURGEON IMPLANTED A 13.2MM VICMO13.2 IMPLANTABLE COLLAMER LENS, -8.0 DIOPTER, INTO THE PATIENT'S RIGHT EYE (OD) ON (B)(6) 2020. REPORTEDLY, THE LENS WAS EXCHANGED ON (B)(6) 2020 WITH A SAME SIZE DIFFERENT MODEL LENS DUE TO REFRACTIVE SURPRISE. THE PROBLEM WAS RESOLVED. THE CAUSE OF THE EVENT IS REPORTED AS UNKNOWN. Manufacturer Narrative: H3 - DE…	Lens Exchange	Resolved
https://www.accessdata.fda.gov/scripts/cdrh/cfdocs/cfMAUDE/Detail.CFM?MDRFOI__ID=12171147&pc=MTA	2023826-2021-02585	2020-08-11	Injury	STAAR SURGICAL COMPANY	2021-07-15	MTA	IMPLANTABLE COLLAMER LENS (ICL)	Misfocusing	Blurred Vision	NA	NA	1	Event Description: THE REPORTER INDICATED THAT A 12.6MM, VICMO12.6, -6.0 DIOPTER, IMPLANTABLE COLLAMER LENS WAS IMPLANTED INTO THE PATIENTS RIGHT EYE (OD) ON (B)(6) 2020. ON (B)(6) 2020 THE LENS WAS EXCHANGED FOR A DIFFERENT MODEL AND DIOPTER LENS DUE TO REFRACTIVE SURPRISE. THIS EXCHANGE RESOLVED THE PROBLEM. PATIENT RELATED FACTOR WAS REPORTED TO BE THE CAUSE OF THIS EVENT. Manufacturer Narrati…	Lens Exchange	Resolved
https://www.accessdata.fda.gov/scripts/cdrh/cfdocs/cfMAUDE/Detail.CFM?MDRFOI__ID=12322376&pc=MTA	2023826-2021-03118	2020-08-21	Injury	STAAR SURGICAL COMPANY	2021-08-15	MTA	IMPLANTABLE COLLAMER LENS	Misfocusing	Blurred Vision	P030016	NA	1	Event Description: THE REPORTER STATES A 13.2MM MICL13.2 IMPLANTABLE COLLAMER LENS -11.5 WAS IMPLANTED INTO THE PATIENT'S RIGHT (OD) EYE ON (B)(6) 2015. ON (B)(6) 2021 THE LENS WAS EXCHANGED WITH A SAME SIZE DIFFERENT DIOPTER LENS DUE TO REFRACTIVE CHANGE OVER TIME. THE PROBLEM IS RESOLVED. THE SURGEON REPORTS, "TRACE CELLS, GOOD VAULT AT 1-WEEK POSTOP" AFTER EXCHANGE. THE CAUSE OF THE EVENT IS R…	Lens Exchange	Resolved
https://www.accessdata.fda.gov/scripts/cdrh/cfdocs/cfMAUDE/Detail.CFM?MDRFOI__ID=12322379&pc=MTA	2023826-2021-03117	2020-08-21	Injury	STAAR SURGICAL COMPANY	2021-08-15	MTA	IMPLANTABLE COLLAMER LENS	Misfocusing	Blurred Vision	P030016	NA	1	Event Description: THE REPORTER STATES A 13.2MM MICL13.2 IMPLANTABLE COLLAMER LENS -11.5 WAS IMPLANTED INTO THE PATIENT'S RIGHT (OD) EYE ON (B)(6) 2015. ON (B)(6) 2021 THE LENS WAS EXCHANGED WITH A SAME SIZE DIFFERENT DIOPTER LENS DUE TO REFRACTIVE CHANGE OVER TIME. THE PROBLEM IS RESOLVED. THE SURGEON REPORTS, "TRACE CELLS, GOOD VAULT AT 1-WEEK POSTOP" AFTER EXCHANGE. THE CAUSE OF THE EVENT IS R…	Lens Exchange	Resolved
https://www.accessdata.fda.gov/scripts/cdrh/cfdocs/cfMAUDE/Detail.CFM?MDRFOI__ID=10755799&pc=MTA	2023826-2020-02463	2020-09-07	Injury	STAAR SURGICAL COMPANY	2020-10-29	MTA	IMPLANTABLE COLLAMER LENS (ICL)	Misfocusing	Blurred Vision	N/A	NA	1	Event Description: THE REPORTER INDICATED THAT A 13.2MM, VICM5_13.2, -06.00 DIOPTER, IMPLANTABLE COLLAMER LENS WAS IMPLANTED INTO THE PATIENT'S LEFT EYE (OS) ON (B)(6) 2020. ON (B)(6) 2020 THE LENS WAS REMOVED AND EXCHANGED WITH A LONGER LENGTH LENS DUE TO REFRACTIVE SURPRISE. THE PROBLEM WAS RESOLVED. CAUSE OF THE EVENT IS REPORTED AS UNKNOWN. Manufacturer Narrative: ADDITIONAL INFORMATION: H3- …	Lens Exchange	Resolved
https://www.accessdata.fda.gov/scripts/cdrh/cfdocs/cfMAUDE/Detail.CFM?MDRFOI__ID=10938834&pc=MTA	2023826-2020-02844	2020-09-28	Injury	STAAR SUGICAL COMPANY	2020-12-03	MTA	IMPLANTABLE COLLAMER LENS (ICL)	Misfocusing	Blurred Vision	NA	NA	1	Event Description: THE REPORTER INDICATED THAT A 12.6MM, VICM5_12.6, -11.50 DIOPTER, IMPLANTABLE COLLAMER LENS WAS IMPLANTED INTO THE PATIENTS LEFT EYE ON (B)(6) 2020. ON (B)(6) 2020 THE LENS WAS EXCHANGED FOR A DIFFERENT DIOPTER LENS DUE TO REFRACTIVE SURPRISE. THIS EXCHANGE RESOLVED THE PROBLEM. Manufacturer Narrative: H3 - DEVICE EVALUATION: LENS WAS RETURNED IN A VIAL IN LIQUID. VISUAL INSPEC…	Lens Exchange	Resolved
https://www.accessdata.fda.gov/scripts/cdrh/cfdocs/cfMAUDE/Detail.CFM?MDRFOI__ID=11788143&pc=MTA	2023826-2021-01393	2020-10-12	Malfunction	STAAR SURGICAL COMPANY	2021-05-06	MTA	IMPLANTABLE COLLAMER LENS (ICL)	Misfocusing	Blurred Vision	NA	NA	1	Event Description: THE REPORTER INDICATED THAT A 12.6MM, VICMO12.6, -7.50 DIOPTER, IMPLANTABLE COLLAMER LENS WAS IMPLANTED INTO THE PATIENTS RIGHT EYE (OD) ON (B)(6) 2020. ON (B)(6) 2020 THE LENS WAS EXCHANGED FOR A DIFFERENT DIOPTER LENS DUE TO REFRACTIVE SURPRISE. THIS EXCHANGE RESOLVED THE PROBLEM. CAUSE OF THIS EVENT IS UNKNOWN. Manufacturer Narrative: H3: DEVICE EVALUATION: THE LENS WAS RETU…	Lens Exchange	Resolved
https://www.accessdata.fda.gov/scripts/cdrh/cfdocs/cfMAUDE/Detail.CFM?MDRFOI__ID=11788188&pc=MTA	2023826-2021-01394	2020-10-12	Injury	STAAR SURGICAL COMPANY	2021-05-06	MTA	IMPLANTABLE COLLAMER LENS (ICL)	Misfocusing	Blurred Vision	NA	NA	1	Event Description: THE REPORTER INDICATED THAT A 12.6MM, VICMO12.6, -7.50 DIOPTER, IMPLANTABLE COLLAMER LENS WAS IMPLANTED INTO THE PATIENTS LEFT EYE (OS) ON (B)(6) 2020. ON (B)(6) 2020 THE LENS WAS EXCHANGED FOR A DIFFERENT DIOPTER LENS DUE TO REFRACTIVE SURPRISE. THIS EXCHANGE RESOLVED THE PROBLEM. CAUSE OF THIS EVENT IS UNKNOWN. Manufacturer Narrative: H3: DEVICE EVALUATION: THE LENS WAS RETUR…	Lens Exchange	Resolved
https://www.accessdata.fda.gov/scripts/cdrh/cfdocs/cfMAUDE/Detail.CFM?MDRFOI__ID=11536792&pc=MTA	2023826-2021-00734	2020-10-17	Injury	STAAR SURGICAL COMPANY	2021-03-21	MTA	IMPLANTABLE COLLAMER LENS (ICL)	Misfocusing	Blurred Vision	NA	NA	1	Event Description: THE REPORTER INDICATED THAT A 13.2MM, VICMO13.2, -7.0 DIOPTER, IMPLANTABLE COLLAMER LENS WAS IMPLANTED INTO THE PATIENTS RIGHT EYE (OD) ON (B)(6) 2020. ON (B)(6) 2020 THE LENS WAS EXCHANGED FOR A DIFFERENT MODEL AND DIOPTER LENS DUE TO REFRACTIVE SURPRISE. THIS EXCHANGE RESOLVED THE PROBLEM. CAUSE OF THE EVENT WAS REPORTER AS UNKNOWN. Manufacturer Narrative: B5 - THE REPORTER I…	Lens Exchange	Resolved
https://www.accessdata.fda.gov/scripts/cdrh/cfdocs/cfMAUDE/Detail.CFM?MDRFOI__ID=10937930&pc=MTA	2023826-2020-02779	2020-10-20	Injury	STAAR SURGICAL COMPANY	2020-12-03	MTA	IMPLANTABLE COLLAMER LENS (ICL)	Misfocusing	Blurred Vision	N/A	NA	1	Event Description: THE REPORTER INDICATED THAT A 13.7MM, VICMO 13.7, -7.50 DIOPTER, IMPLANTABLE COLLAMER LENS WAS IMPLANTED INTO THE PATIENT'S RIGHT EYE (OD) ON APR/2015. REFRACTIVE SURPRISE WITH GLARE/HALOES WAS OBSERVED. THE LENS REMAINS IMPLANTED. IF ADDITIONAL INFORMATION IS RECEIVED, A SUPPLEMENTAL MEDWATCH REPORT WILL BE SUBMITTED. Manufacturer Narrative: ADDITIONAL INFORMATION: B5: THE REP…	Lens Exchange	Resolved
https://www.accessdata.fda.gov/scripts/cdrh/cfdocs/cfMAUDE/Detail.CFM?MDRFOI__ID=11563239&pc=MTA	2023826-2021-00762	2020-10-21	Injury	STAAR SURGICAL COMPANY	2021-03-24	MTA	IMPLANTABLE COLLAMER LENS (ICL)	Misfocusing	Blurred Vision	N/A	NA	1	Event Description: THE REPORTER INDICATED THAT A 13.2MM, VICMO 13.2, -04.50 DIOPTER, IMPLANTABLE COLLAMER LENS WAS IMPLANTED INTO THE PATIENT'S RIGHT EYE (OD) ON (B)(6) 2020. THE LENS WAS REMOVED AND EXCHANGED FOR A SAME LENGTH LENS WITH A -5.5 DIOPTER TO RESOLVE THE PROBLEM. CAUSE OF THE EVENT IS REPORTED AS UNKNOWN. Manufacturer Narrative: ADDITIONAL INFORMATION: H3 - DEVICE EVALUATION: LENS WA…	Lens Exchange	Resolved
https://www.accessdata.fda.gov/scripts/cdrh/cfdocs/cfMAUDE/Detail.CFM?MDRFOI__ID=13317799&pc=MTA	2023826-2022-00205	2020-11-01	Injury	STAAR SURGICAL COMPANY	2022-01-21	MTA	IMPLANTABLE COLLAMER LENS	Misfocusing	Blurred Vision	NA	NA	1	Event Description: THE REPORTER INDICATED THAT THE SURGEON IMPLANTED A 13.2MM VICMO13.2 IMPLANTABLE COLLAMER LENS, -14.5 DIOPTER INTO THE PATIENT'S LEFT EYE (OS) ON (B)(6) 2021. REPORTEDLY THE LENS WAS EXCHANGED ON (B)(6) 2021 WITH A SAME SIZE DIFFERENT DIOPTER LENS DUE TO REFRACTIVE SURPRISE. THE PROBLEM WAS RESOLVED. THE CAUSE OF THE EVENT IS REPORTED AS UNKNOWN.Event Description: THE REPORTER …	Lens Exchange	Resolved
https://www.accessdata.fda.gov/scripts/cdrh/cfdocs/cfMAUDE/Detail.CFM?MDRFOI__ID=11710516&pc=MTA	2023826-2021-01107	2020-11-08	Injury	STAAR SURGICAL COMPANY	2021-04-22	MTA	IMPLANTABLE COLLAMER LENS (ICL)	Misfocusing	Blurred Vision	NA	NA	1	Event Description: THE REPORTER INDICATED THAT A 13.2MM, VICMO13.2, -11.0 DIOPTER, IMPLANTABLE COLLAMER LENS WAS IMPLANTED INTO THE PATIENTS RIGHT EYE (OD) ON (B)(6) 2020. ON (B)(6) 2020 THE LENS WAS EXCHANGED FOR A DIFFERENT DIOPTER LENS DUE TO REFRACTIVE SURPRISE. THIS EXCHANGE RESOLVED THE PROBLEM. CAUSE OF THE EVENT WAS REPORTER AS UNKNOWN. Manufacturer Narrative: H3 - DEVICE EVALUATION: LENS…	Lens Exchange	Resolved
https://www.accessdata.fda.gov/scripts/cdrh/cfdocs/cfMAUDE/Detail.CFM?MDRFOI__ID=11416066&pc=MTA	2023826-2021-00564	2020-11-13	Injury	STAAR SURGICAL COMPANY	2021-03-04	MTA	IMPLANTABLE COLLAMER LENS (ICL)	Misfocusing	Blurred Vision	NA	NA	1	Event Description: THE REPORTER INDICATED THAT THE SURGEON IMPLANTED A IMPLANTABLE COLLAMER LENS INTO THE PATIENT'S RIGHT EYE (OD) ON (B)(6) 2020. AN "UNEXPECTED REFRACTIVE OUTCOME" AND A 25 DEGREES ROTATION WAS OBSERVED. LENS REMAINS IMPLANTED. ADDITIONAL INFORMATION HAS BEEN REQUESTED BUT NONE HAS BEEN FORTHCOMING. IF ADDITIONAL INFORMATION IS RECEIVED A SUPPLEMENTAL MEDWATCH REPORT WILL BE SUB…	Lens Exchange	Unknown
https://www.accessdata.fda.gov/scripts/cdrh/cfdocs/cfMAUDE/Detail.CFM?MDRFOI__ID=11416418&pc=MTA	2023826-2021-00513	2020-11-29	Injury	STAAR SURGICAL COMPANY	2021-03-04	MTA	IMPLANTABLE COLLAMER LENS (ICL)	Misfocusing	Blurred Vision	N/A	NA	1	Event Description: THE REPORTER INDICATED THAT A 13.2MM, VICM5 12.6, -09.50 DIOPTER, IMPLANTABLE COLLAMER LENS WAS IMPLANTED INTO THE PATIENT'S RIGHT EYE (OD) ON (B)(6) 2020. ON (B)(6) 2021 THE LENS WAS EXCHANGED WITH A SAME SIZE, HIGHER POWER LENS DUE TO REFRACTIVE SURPRISE. THE PROBLEM WAS RESOLVED. CAUSE OF THE EVENT IS REPORTED AS UNKNOWN. PER THE REPORTER ON (B)(6) 2021, "THERE IS NO PROBLEM…	Lens Exchange	Resolved
https://www.accessdata.fda.gov/scripts/cdrh/cfdocs/cfMAUDE/Detail.CFM?MDRFOI__ID=12544735&pc=MTA	2023826-2021-03791	2020-12-04	Injury	STAAR SURGICAL COMPANY	2021-09-28	MTA	IMPLANTABLE COLLAMER LENS (ICL)	Misfocusing	Blurred Vision	NA	NA	1	Event Description: THE REPORTER INDICATED THAT A 12.6MM, VICMO12.6, -2.00 DIOPTER, IMPLANTABLE COLLAMER LENS WAS IMPLANTED INTO THE PATIENTS LEFT EYE (OS) ON (B)(6) 2020. ON (B)(6) 2021 THE LENS WAS EXCHANGED WITH A DIFFERENT DIOPTER LENS DUE TO REFRACTIVE SURPRISE. THIS EXCHANGE RESOLVED THE PROBLEM. CAUSE OF EVENT WAS UNKNOWN. Manufacturer Narrative: H3 - DEVICE EVALUATION: THE LENS WAS RETURNE…	Lens Exchange	Resolved
https://www.accessdata.fda.gov/scripts/cdrh/cfdocs/cfMAUDE/Detail.CFM?MDRFOI__ID=11135923&pc=MTA	2023826-2021-00059	2020-12-11	Injury	STAAR SURGICAL COMPANY	2021-01-07	MTA	IMPLANTABLE COLLAMER LENS (ICL)	Misfocusing	Blurred Vision	N/A	NA	1	Event Description: THE REPORTER INDICATED THAT A 13.2MM, VICM5_13.2, -8.50, IMPLANTABLE COLLAMER LENS WAS IMPLANTED INTO THE PATIENT'S LEFT EYE (OS) ON (B)(6) 2020. ON (B)(6) 2020 THE LENS WAS EXCHANGED WITH A SAME SIZE DIFFERENT MODEL LENS AND THE PROBLEM WAS RESOLVED. Manufacturer Narrative: H6-INVESTIGATION TYPE 4110: LENS WORK ORDER SEARCH-NO SIMILAR COMPLAINT TYPE EVENTS REPORTED FOR UNITS W…	Lens Exchange	Resolved
https://www.accessdata.fda.gov/scripts/cdrh/cfdocs/cfMAUDE/Detail.CFM?MDRFOI__ID=11855179&pc=MTA	2023826-2021-01509	2020-12-12	Injury	STAAR SURGICAL COMPANY	2021-05-20	MTA	IMPLANTABLE COLLAMER LENS (ICL)	Misfocusing	Blurred Vision	N/A	NA	1	Event Description: THE REPORTER INDICATED THAT A 12.1MM, VICMO 12.1, -04.50 DIOPTER, IMPLANTABLE COLLAMER LENS WAS IMPLANTED INTO THE PATIENT'S LEFT EYE (OS) ON (B)(6) 2020. ON (B)(6) 2021 THE LENS WAS EXCHANGED WITH A SAME SIZE , HIGHER POWER (SPHERE/CYLINDER/AXIS) LENS DUE TO REFRACTIVE SURPRISE. THE PROBLEM WAS RESOLVED. CAUSE OF THE EVENT IS REPORTED AS UNKNOWN. Manufacturer Narrative: DATE R…	Lens Exchange	Resolved
https://www.accessdata.fda.gov/scripts/cdrh/cfdocs/cfMAUDE/Detail.CFM?MDRFOI__ID=11366536&pc=MTA	2023826-2021-00479	2020-12-13	Injury	STAAR SURGICAL COMPANY	2021-02-23	MTA	IMPLANTABLE COLLAMER LENS	Misfocusing	Blurred Vision	NA	NA	1	Event Description: THE REPORTER INDICATED THAT THE SURGEON IMPLANTED A 12.1MM VICMO12.1 IMPLANTABLE COLLAMER LENS, -16.5 DIOPTER, INTO THE PATIENT'S RIGHT EYE (OD) ON (B)(6) 2020. REPORTEDLY, THE LENS WAS EXCHANGED ON (B)(6) 2020 WITH A SAME SIZE, DIFFERENT DIOPTER LENS DUE TO REFRACTIVE SURPRISE. THE PROBLEM WAS RESOLVED. THE CAUSE OF THE EVENT IS REPORTED AS UNKNOWN. Manufacturer Narrative: H3 …	Lens Exchange	Resolved
https://www.accessdata.fda.gov/scripts/cdrh/cfdocs/cfMAUDE/Detail.CFM?MDRFOI__ID=13256327&pc=MTA	2023826-2022-00151	2020-12-15	Injury	STAAR SURGICAL COMPANY	2022-01-13	MTA	IMPLANTABLE COLLAMER LENS	Misfocusing	Blurred Vision	NA	NA	1	Event Description: THE REPORTER INDICATED THAT THE SURGEON IMPLANTED A COLLAMER LENS, -13.5 DIOPTER INTO THE PATIENT'S LEFT EYE (OS) ON (B)(6) 2020. REPORTEDLY THE LENS WAS EXCHANGED ON (B)(6) 2020 WITH A SAME SIZE DIFFERENT DIOPTER LENS DUE TO REFRACTIVE SURPRISE. THE PROBLEM WAS RESOLVED. THE CAUSE OF THE EVENT IS REPORTED AS UNKNOWN. Manufacturer Narrative: PMA/510(K): THIS PRODUCT IS MANUFACT…	Lens Exchange	Resolved
https://www.accessdata.fda.gov/scripts/cdrh/cfdocs/cfMAUDE/Detail.CFM?MDRFOI__ID=12178442&pc=MTA	2023826-2021-02711	2020-12-25	Injury	STAAR SURGICAL COMPANY	2021-07-15	MTA	IMPLANTABLE COLLAMER LENS	Misfocusing	Blurred Vision	NA	NA	1	Event Description: THE REPORTER INDICATED THAT THE SURGEON IMPLANTED A 12.1MM VICM5_12.1 IMPLANTABLE COLLAMER LENS, -12.5 DIOPTER INTO THE PATIENT'S LEFT EYE (OS) ON (B)(6) 2020. REPORTEDLY, THE LENS WAS EXCHANGED ON (B)(6) 2021 WITH A SAME SIZE, DIFFERENT DIOPTER LENS DUE TO REFRACTIVE SURPRISE. THE PROBLEM WAS RESOLVED. THE CAUSE OF THE EVENT IS REPORTED AS UNKNOWN. Manufacturer Narrative: DEVI…	Lens Exchange	Resolved
https://www.accessdata.fda.gov/scripts/cdrh/cfdocs/cfMAUDE/Detail.CFM?MDRFOI__ID=12207945&pc=MTA	2023826-2021-02747	2021-01-01	Injury	STAAR SURGICAL COMPANY	2021-07-21	MTA	IMPLANTABLE COLLAMER LENS (ICL)	Misfocusing	Blurred Vision	NA	NA	1	Event Description: THE REPORTER INDICATED THAT A 12.6MM, VICMO12.6, -4.00 DIOPTER, IMPLANTABLE COLLAMER LENS WAS IMPLANTED INTO THE PATIENTS LEFT EYE (OS) ON (B)(6) 2020. ON (B)(6) 2021 THE LENS WAS EXCHANGED FOR A DIFFERENT MODEL AND DIOPTER LENS. THIS EXCHANGE RESOLVED THE PROBLEM. CAUSE OF EVENT WAS UNKNOWN. Manufacturer Narrative: ADDITIONAL INFORMATION: H3-DEVICE EVALUATION: LENS RETURNED IN…	Lens Exchange	Resolved
https://www.accessdata.fda.gov/scripts/cdrh/cfdocs/cfMAUDE/Detail.CFM?MDRFOI__ID=11942684&pc=MTA	2023826-2021-01770	2021-01-08	Injury	STAAR SURGICAL COMPANY	2021-06-04	MTA	IMPLANTABLE COLLAMER LENS	Misfocusing	Blurred Vision	NA	NA	1	Event Description: THE REPORTER INDICATED THAT THE SURGEON IMPLANTED A 12.6MM VICMO12.6 IMPLANTABLE COLLAMER LENS, -10.0 DIOPTER, INTO THE PATIENT'S LEFT EYE (OS) ON (B)(6) 2020. ON (B)(6) 2021 THE LENS WAS EXCHANGED WITH A SAME SIZE DIFFERENT DIOPTER LENS DUE TO REFRACTIVE SURPRISE. THE PROBLEM WAS RESOLVED. THE CAUSE OF THE EVENT IS REPORTED AS UNKNOWN. Manufacturer Narrative: H3: DEVICE EVALUA…	Lens Exchange	Resolved
https://www.accessdata.fda.gov/scripts/cdrh/cfdocs/cfMAUDE/Detail.CFM?MDRFOI__ID=11308762&pc=MTA	2023826-2021-00308	2021-01-14	Injury	STAAR SURGICAL COMPANY	2021-02-10	MTA	IMPLANTABLE COLLAMER LENS (ICL)	Misfocusing	Blurred Vision	N/A	NA	1	Event Description: THE REPORTER INDICATED THAT A 12.6MM, VICM5 12.6, -06.50 DIOPTER, IMPLANTABLE COLLAMER LENS WAS IMPLANTED INTO THE PATIENT'S LEFT EYE (OS) ON (B)(6) 2020. REFRACTIVE SURPRISE WAS OBSERVED, THE LENS REMAINS IMPLANTED. CAUSE OF THE EVENT IS REPORTED AS UNKNOWN. ADDITIONAL INFORMATION HAS BEEN REQUESTED BUT NONE HAS BEEN FORTHCOMING. IF ADDITIONAL INFORMATION IS RECEIVED A SUPPLEM…	Lens Exchange	Resolved
https://www.accessdata.fda.gov/scripts/cdrh/cfdocs/cfMAUDE/Detail.CFM?MDRFOI__ID=11343195&pc=MTA	2023826-2021-00398	2021-01-20	Injury	STAAR SURGICAL COMPANY	2021-02-18	MTA	IMPLANTABLE COLLAMER LENS (ICL)	Misfocusing	Blurred Vision	N/A	NA	1	Event Description: THE REPORTER INDICATED THAT A 12.6MM, VICM5_12.6, -10.50 DIOPTER, IMPLANTABLE COLLAMER LENS WAS IMPLANTED INTO THE PATIENT'S RIGHT EYE (OD) ON (B)(6) 2020. REFRACTIVE CHANGE OVERTIME WAS OBSERVED, THE LENS REMAINS IMPLANTED. ADDITIONAL INFORMATION HAS BEEN REQUESTED BUT NONE HAS BEEN FORTHCOMING. IF ADDITIONAL INFORMATION IS RECEIVED A SUPPLEMENTAL MEDWATCH REPORT WILL BE SUBMI…	Lens Exchange	Resolved
https://www.accessdata.fda.gov/scripts/cdrh/cfdocs/cfMAUDE/Detail.CFM?MDRFOI__ID=11942674&pc=MTA	2023826-2021-01779	2021-02-01	Injury	STAAR SURGICAL COMPANY	2021-06-04	MTA	IMPLANTABLE COLLAMER LENS	Misfocusing	Blurred Vision	NA	NA	1	Event Description: THE REPORTER INDICATED THAT THE SURGEON IMPLANTED A 12.6MM VICMO12.6 IMPLANTABLE COLLAMER LENS, -6.0 DIOPTER, INTO THE PATIENT'S RIGHT EYE (OD) ON (B)(6) 2020. REPORTEDLY, THE LENS WAS EXCHANGED ON (B)(6) 2021 WITH A LONGER LENS DUE TO LOW VAULT AND REFRACTIVE SURPRISE. THE PROBLEM WAS RESOLVED. THE CAUSE OF THE EVENT IS REPORTED AS UNKNOWN. Manufacturer Narrative: THIS PRODUCT…	Lens Exchange	Resolved
https://www.accessdata.fda.gov/scripts/cdrh/cfdocs/cfMAUDE/Detail.CFM?MDRFOI__ID=11400353&pc=MTA	2023826-2021-00514	2021-02-02	Injury	STAAR SURGICAL COMPANY	2021-03-02	MTA	IMPLANTABLE COLLAMER LENS	Misfocusing	Blurred Vision	NA	NA	1	Event Description: THE REPORTER INDICATED THAT THE SURGEON IMPLANTED A 13.2MM VICM5_13.2 IMPLANTABLE COLLAMER LENS, -2.5 DIOPTER INTO THE PATIENT'S RIGHT EYE (OD) ON (B)(6) 2020. ON (B)(6) 2021 THE LENS WAS EXPLANTED DUE TO REFRACTIVE SURPRISE. ON THE SAME DATE IN A SEPARATE SURGERY, A SAME SIZE DIFFERENT DIOPTER LENS WAS IMPLANTED AND THE PROBLEM WAS RESOLVED. THE CAUSE OF THE EVENT IS REPORTED …	Lens Exchange	Resolved
https://www.accessdata.fda.gov/scripts/cdrh/cfdocs/cfMAUDE/Detail.CFM?MDRFOI__ID=11751223&pc=MTA	2023826-2021-01284	2021-02-08	Injury	STAAR SURGICAL COMPANY	2021-04-30	MTA	IMPLANTABLE COLLAMER LENS (ICL)	Misfocusing	Blurred Vision	NA	NA	1	Event Description: THE REPORTER INDICATED THAT A 12.6MM, VICM5_12.6, -7.00 DIOPTER, IMPLANTABLE COLLAMER LENS WAS IMPLANTED INTO THE PATIENTS RIGHT EYE (OD) ON (B)(6) 2020. ON (B)(6) 2021 THE LENS WAS EXCHANGED FOR A DIFFERENT MODEL AND DIOPTER LENS. THIS EXCHANGE RESOLVED THE PROBLEM. Manufacturer Narrative: WEIGHT: UNK, ETHNICITY: UNK, RACE: UNK. THIS PRODUCT IS NOT MARKETED IN THE US. WORK ORD…	Lens Exchange	Resolved
https://www.accessdata.fda.gov/scripts/cdrh/cfdocs/cfMAUDE/Detail.CFM?MDRFOI__ID=12207967&pc=MTA	2023826-2021-02748	2021-03-01	Injury	STAAR SURGICAL COMPANY	2021-07-21	MTA	IMPLANTABLE COLLAMER LENS (ICL)	Misfocusing	Blurred Vision	NA	NA	1	Event Description: THE REPORTER INDICATED THAT A 12.1MM, VICMO12.1, -10.00 DIOPTER, IMPLANTABLE COLLAMER LENS WAS IMPLANTED INTO THE PATIENTS RIGHT EYE (OD) ON (B)(6) 2020. ON (B)(6) 2021 THE LENS WAS EXCHANGED FOR A DIFFERENT MODEL AND DIOPTER LENS. THIS EXCHANGE RESOLVED THE PROBLEM. CAUSE OF EVENT WAS UNKNOWN. Manufacturer Narrative: ADDITIONAL INFORMATION: H3-DEVICE EVALUATION: LENS RETURNED …	Lens Exchange	Resolved
https://www.accessdata.fda.gov/scripts/cdrh/cfdocs/cfMAUDE/Detail.CFM?MDRFOI__ID=11620582&pc=MTA	2023826-2021-00867	2021-03-03	Injury	STAAR SURGICAL COMPANY	2021-04-06	MTA	IMPLANTABLE COLLAMER LENS	Misfocusing	Blurred Vision	NA	NA	1	Event Description: THE REPORTER INDICATED THAT THE SURGEON IMPLANTED A 13.2MM VICMO13.2 IMPLANTABLE COLLAMER LENS, -6.5 DIOPTER, INTO THE PATIENT'S LEFT EYE (OS) ON (B)(6) 2021. REPORTEDLY, THE LENS WAS EXCHANGED ON (B)(6) 2021 WITH A SAME SIZE DIFFERENT DIOPTER LENS DUE TO REFRACTIVE SURPRISE. THE PROBLEM WAS RESOLVED. THE CAUSE OF THE EVENT IS REPORTED AS UNKNOWN. Manufacturer Narrative: ADDITI…	Lens Exchange	Resolved
https://www.accessdata.fda.gov/scripts/cdrh/cfdocs/cfMAUDE/Detail.CFM?MDRFOI__ID=12378621&pc=MTA	2023826-2021-03375	2021-03-03	Injury	STAAR SURGICAL COMPANY	2021-08-27	MTA	IMPLANTABLE COLLAMER LENS	Misfocusing	Blurred Vision	NA	NA	1	Event Description: THE REPORTER INDICATED THAT THE SURGEON IMPLANTED A 13.2MM VICMO13.2 IMPLANTABLE COLLAMER LENS, -16.0 DIOPTER INTO THE PATIENT'S RIGHT EYE (OD) ON (B)(6) 2021. REPORTEDLY, THE LENS WAS EXCHANGED ON (B)(6) 2021 WITH A SAME SIZE DIFFERENT DIOPTER LENS DUE TO REFRACTIVE SURPRISE. THE PROBLEM WAS RESOLVED. THE CAUSE OF THE EVENT IS REPORTED AS UNKNOWN. Manufacturer Narrative: ADDIT…	Lens Exchange	Resolved
https://www.accessdata.fda.gov/scripts/cdrh/cfdocs/cfMAUDE/Detail.CFM?MDRFOI__ID=12207976&pc=MTA	2023826-2021-02749	2021-03-05	Injury	STAAR SURGICAL COMPANY	2021-07-21	MTA	IMPLANTABLE COLLAMER LENS (ICL)	Misfocusing	Blurred Vision	NA	NA	1	Event Description: THE REPORTER INDICATED THAT A 12.1MM, VICMO12.1, -10.50 DIOPTER, IMPLANTABLE COLLAMER LENS WAS IMPLANTED INTO THE PATIENTS LEFT EYE (OS) ON (B)(6) 2020. ON (B)(6) 2021 THE LENS WAS EXCHANGED FOR A DIFFERENT MODEL AND DIOPTER LENS. THIS EXCHANGE RESOLVED THE PROBLEM. CAUSE OF EVENT WAS UNKNOWN. Manufacturer Narrative: ADDITIONAL INFORMATION: H3-DEVICE EVALUATION: LENS RETURNED I…	Lens Exchange	Resolved
https://www.accessdata.fda.gov/scripts/cdrh/cfdocs/cfMAUDE/Detail.CFM?MDRFOI__ID=11683173&pc=MTA	2023826-2021-01074	2021-03-16	Injury	STAAR SURGICAL COMPANY	2021-04-17	MTA	IMPLANTABLE COLLAMER LENS (ICL)	Misfocusing	Blurred Vision	NA	NA	1	Event Description: THE REPORTER INDICATED THAT A 13.7MM, VICMO13.7, -00.75 DIOPTER, IMPLANTABLE COLLAMER LENS WAS IMPLANTED INTO THE PATIENTS LEFT EYE (OS) ON (B)(6) 2016. REFRACTIVE CHANGE OVERTIME WAS OBSERVED. LENS REMAINS IMPLANTED. THE REPORTER STATED "PATIENT HAS TRIED TO GET AN ENHANCEMENT THERAPY ELSEWHERE AND HAS GOT A TRANS-PRK WIT -1.00 (DR. (B)(6)) THIS THERAPY HAD NO REFRACTIVE EFFEC…	Lens Exchange	Not_Resolved
https://www.accessdata.fda.gov/scripts/cdrh/cfdocs/cfMAUDE/Detail.CFM?MDRFOI__ID=11781991&pc=MTA	2023826-2021-01385	2021-03-19	Injury	STAAR SURGICAL COMPANY	2021-05-06	MTA	IMPLANTABLE COLLAMER LENS (ICL)	Misfocusing	Blurred Vision	NA	NA	1	Event Description: THE REPORTER INDICATED THAT A 12.6MM, VICM5_12.6, -5.00 DIOPTER, IMPLANTABLE COLLAMER LENS WAS IMPLANTED INTO THE PATIENTS LEFT EYE (OS) ON (B)(6) 2020. ON (B)(6) 2021 THE LENS WAS EXCHANGED FOR A DIFFERENT DIOPTER LENS DUE TO REFRACTIVE SURPRISE. THIS EXCHANGE RESOLVED THE PROBLEM. CAUSE OF THIS EVENT IS UNKNOWN. Manufacturer Narrative: H3 - DEVICE EVALUATION: THE LENS WAS RET…	Lens Exchange	Resolved
https://www.accessdata.fda.gov/scripts/cdrh/cfdocs/cfMAUDE/Detail.CFM?MDRFOI__ID=11782012&pc=MTA	2023826-2021-01386	2021-03-26	Injury	STAAR SURGICAL COMPANY	2021-05-06	MTA	IMPLANTABLE COLLAMER LENS (ICL)	Misfocusing	Blurred Vision	NA	NA	1	Event Description: THE REPORTER INDICATED THAT A 12.6MM, VICM5_12.6, -4.00 DIOPTER, IMPLANTABLE COLLAMER LENS WAS IMPLANTED INTO THE PATIENTS LEFT EYE (OS) ON (B)(6) 2020. ON (B)(6) 2021 THE LENS WAS EXCHANGED FOR A MODEL AND DIFFERENT DIOPTER LENS DUE TO REFRACTIVE SURPRISE. THIS EXCHANGE RESOLVED THE PROBLEM. CAUSE OF THIS EVENT IS UNKNOWN. Manufacturer Narrative: H3: DEVICE EVALUATION: THE LEN…	Lens Exchange	Resolved
https://www.accessdata.fda.gov/scripts/cdrh/cfdocs/cfMAUDE/Detail.CFM?MDRFOI__ID=11942685&pc=MTA	2023826-2021-01769	2021-04-15	Injury	STAAR SURGICAL COMPANY	2021-06-04	MTA	IMPLANTABLE COLLAMER LENS	Misfocusing	Blurred Vision	NA	NA	1	Event Description: THE REPORTER INDICATED THAT THE SURGEON IMPLANTED A 12.6MM VICMO12.6 IMPLANTABLE COLLAMER LENS, -15.0 DIOPTER, INTO THE PATIENT'S RIGHT EYE (OD) ON (B)(6) 2021. REPORTEDLY, THE LENS WAS EXCHANGED ON (B)(6) 2021 WITH A SAME SIZE, DIFFERENT DIOPTER LENS DUE TO REFRACTIVE SURPRISE. THE PROBLEM WAS RESOLVED. THE CAUSE OF THE EVENT IS REPORTED AS UNKNOWN. Manufacturer Narrative: H3-…	Lens Exchange	Resolved
https://www.accessdata.fda.gov/scripts/cdrh/cfdocs/cfMAUDE/Detail.CFM?MDRFOI__ID=12457492&pc=MTA	2023826-2021-03552	2021-04-19	Injury	STAAR SURGICAL COMPANY	2021-09-10	MTA	IMPLANTABLE COLLAMER LENS	Misfocusing	Blurred Vision	NA	NA	1	Event Description: THE REPORTER INDICATED THAT THE SURGEON IMPLANTED A 12.6MM VICMO12.6 IMPLANTABLE COLLAMER LENS, -8.0 DIOPTER INTO THE PATIENT'S RIGHT EYE (OD) ON (B)(6) 2021. REPORTEDLY, THE LENS WAS EXCHANGED ON (B)(6) 2021 WITH A SAME SIZE DIFFERENT DIOPTER LENS DUE TO REFRACTIVE SURPRISE. THE PROBLEM WAS RESOLVED. THE CAUSE OF THE EVENT IS REPORTED AS UNKNOWN. Manufacturer Narrative: H3 - D…	Lens Exchange	Resolved
https://www.accessdata.fda.gov/scripts/cdrh/cfdocs/cfMAUDE/Detail.CFM?MDRFOI__ID=12208015&pc=MTA	2023826-2021-02759	2021-04-22	Injury	STAAR SURGICAL COMPANY	2021-07-21	MTA	IMPLANTABLE COLLAMER LENS (ICL)	Misfocusing	Blurred Vision	NA	NA	1	Event Description: THE REPORTER INDICATED THAT A 13.2MM, VICMO13.2, -7.5 DIOPTER, IMPLANTABLE COLLAMER LENS WAS IMPLANTED INTO THE PATIENTS RIGHT EYE (OD) ON (B)(6) 2021. ON (B)(6) 2021 THE LENS WAS EXCHANGED FOR A DIFFERENT DIOPTER LENS. THIS EXCHANGE RESOLVED THE PROBLEM. CAUSE OF EVENT WAS UNKNOWN. Manufacturer Narrative: ADDITIONAL INFORMATION; H3-DEVICE EVALUATION: LENS RETURNED IN A MICRO-C…	Lens Exchange	Resolved
https://www.accessdata.fda.gov/scripts/cdrh/cfdocs/cfMAUDE/Detail.CFM?MDRFOI__ID=12524257&pc=MTA	2023826-2021-03720	2021-04-23	Injury	STAAR SURGICAL COMPANY	2021-09-24	MTA	IMPLANTABLE COLLAMER LENS (ICL)	Misfocusing	Blurred Vision	NA	NA	1	Event Description: THE REPORTER INDICATED THAT A 13.2MM, VICMO13.2 -5.0 DIOPTER, IMPLANTABLE COLLAMER LENS WAS IMPLANTED INTO THE PATIENTS LEFT EYE (OS) ON (B)(6) 2021. ON (B)(6) 2021 THE LENS WAS EXCHANGED FOR A DIFFERENT MODEL AND DIOPTER LENS DUE TO REFRACTIVE SURPRISE. THIS EXCHANGE RESOLVED THE PROBLEM. CAUSE OF EVENT UNKNOWN. Manufacturer Narrative: H3: DEVICE EVALUATION:LENS WAS RETURNED I…	Lens Exchange	Resolved
https://www.accessdata.fda.gov/scripts/cdrh/cfdocs/cfMAUDE/Detail.CFM?MDRFOI__ID=12524286&pc=MTA	2023826-2021-03719	2021-04-23	Injury	STAAR SURGICAL COMPANY	2021-09-24	MTA	IMPLANTABLE COLLAMER LENS (ICL)	Misfocusing	Blurred Vision	NA	NA	1	Event Description: THE REPORTER INDICATED THAT A 13.2MM, VICMO13.2 -5.0 DIOPTER, IMPLANTABLE COLLAMER LENS WAS IMPLANTED INTO THE PATIENTS RIGHT EYE (OD) ON (B)(6) 2021. ON (B)(6) 2021 THE LENS WAS EXCHANGED FOR A DIFFERENT MODEL AND DIOPTER LENS DUE TO REFRACTIVE SURPRISE. THIS EXCHANGE RESOLVED THE PROBLEM. CAUSE OF EVENT UNKNOWN. Manufacturer Narrative: H3: DEVICE EVALUATION:LENS WAS RETURNED …	Lens Exchange	Resolved
https://www.accessdata.fda.gov/scripts/cdrh/cfdocs/cfMAUDE/Detail.CFM?MDRFOI__ID=12072245&pc=MTA	2023826-2021-02086	2021-05-14	Injury	STAAR SURGICAL COMPANY	2021-06-25	MTA	IMPLANTABLE COLLAMER LENS	Misfocusing	Blurred Vision	NA	NA	1	Event Description: THE REPORTER INDICATED THAT THE SURGEON IMPLANTED A 12.1MM VICM5_12.1 IMPLANTABLE COLLAMER LENS, -5.0 DIOPTER, INTO THE PATIENT'S LEFT EYE (OS) ON (B)(6) 2020. REPORTEDLY, THE LENS WAS EXCHANGED ON (B)(6) 2021 WITH A SAME SIZE, DIFFERENT MODEL LENS DUE TO REFRACTIVE SURPRISE. THE PROBLEM WAS RESOLVED. THE CAUSE OF THE EVENT IS REPORTED AS UNKNOWN. Manufacturer Narrative: ADDITI…	Lens Exchange	Resolved
https://www.accessdata.fda.gov/scripts/cdrh/cfdocs/cfMAUDE/Detail.CFM?MDRFOI__ID=12072278&pc=MTA	2023826-2021-02085	2021-05-14	Injury	STAAR SURGICAL COMPANY	2021-06-25	MTA	IMPLANTABLE COLLAMER LENS	Misfocusing	Blurred Vision	NA	NA	1	Event Description: THE REPORTER INDICATED THAT THE SURGEON IMPLANTED A 12.1MM VICM5_12.1 IMPLANTABLE COLLAMER LENS, -4.0 DIOPTER, INTO THE PATIENT'S RIGHT EYE (OD) ON (B)(6) 2020. REPORTEDLY, THE LENS WAS EXCHANGED ON (B)(6) 2021 WITH A SAME SIZE, DIFFERENT MODEL LENS DUE TO REFRACTIVE SURPRISE. THE PROBLEM WAS RESOLVED. THE CAUSE OF THE EVENT IS REPORTED AS UNKNOWN. Manufacturer Narrative: ADDIT…	Lens Exchange	Resolved
https://www.accessdata.fda.gov/scripts/cdrh/cfdocs/cfMAUDE/Detail.CFM?MDRFOI__ID=12544805&pc=MTA	2023826-2021-03793	2021-05-16	Injury	STAAR SURGICAL COMPANY	2021-09-28	MTA	IMPLANTABLE COLLAMER LENS (ICL)	Misfocusing	Blurred Vision	NA	NA	1	Event Description: THE REPORTER INDICATED THAT A 13.2MM, VICMO13.2, -4.50 DIOPTER, IMPLANTABLE COLLAMER LENS WAS IMPLANTED INTO THE PATIENTS LEFT EYE (OS) ON (B)(6) 2021. ON (B)(6) 2021 THE LENS WAS EXCHANGED WITH A DIFFERENT MODEL, LENGTH AND DIOPTER LENS DUE TO REFRACTIVE SURPRISE. THIS EXCHANGE RESOLVED THE PROBLEM. CAUSE OF EVENT WAS UNKNOWN. Manufacturer Narrative: H3 - DEVICE EVALUATION: TH…	Lens Exchange	Resolved
https://www.accessdata.fda.gov/scripts/cdrh/cfdocs/cfMAUDE/Detail.CFM?MDRFOI__ID=12072479&pc=MTA	2023826-2021-02033	2021-05-18	Injury	STAAR SURGICAL COMPANY	2021-06-26	MTA	IMPLANTABLE COLLAMER LENS (ICL)	Misfocusing	Blurred Vision	NA	NA	1	Event Description: THE REPORTER INDICATED THAT A 12.6MM, VICM5_12.6, -6.5 DIOPTER, IMPLANTABLE COLLAMER LENS WAS IMPLANTED INTO THE PATIENTS RIGHT EYE (OD) ON (B)(6) 2021. THE LENS WAS LATER EXPLANTED DUE TO VISUAL ACUITY NOT BEING AS EXPECTED AFTER SURGERY. CAUSE OF EVENT WAS UNKNOWN. IF ADDITIONAL INFORMATION IS RECEIVED A SUPPLEMENTAL MEDWATCH REPORT WILL BE SUBMITTED. Manufacturer Narrative: …	Lens Extraction	Unknown
https://www.accessdata.fda.gov/scripts/cdrh/cfdocs/cfMAUDE/Detail.CFM?MDRFOI__ID=11986341&pc=MTA	2023826-2021-01874	2021-05-21	Malfunction	STAAR SURGICAL COMPANY	2021-06-11	MTA	IMPLANTABLE COLLAMER LENS (ICL)	Misfocusing	Blurred Vision	N/A	NA	1	Event Description: THE REPORTER INDICATED THAT THE SURGEON IMPLANTED A 13.2MM VICM5_13.2 IMPLANTABLE COLLAMER LENS, -4.0 DIOPTER INTO THE PATIENT'S RIGHT EYE (OD) ON (B)(6) 2021. THE SURGEON REPORTS BLURRED NIGHT VISION DUE TO LARGE PUPIL SIZE. REPORTEDLY, THE LENS REMAINS IMPLANTED. Manufacturer Narrative: H6: INVESTIGATION TYPE 4110: LENS WORK ORDER SEARCH. NO SIMILAR COMPLAINT TYPE EVENTS REPO…	Lens Retention	Unknown
https://www.accessdata.fda.gov/scripts/cdrh/cfdocs/cfMAUDE/Detail.CFM?MDRFOI__ID=12791894&pc=MTA	2023826-2021-04319	2021-05-26	Injury	STAAR SURGICAL COMPANY	2021-11-10	MTA	IMPLANTABLE COLLAMER LENS (ICL)	Misfocusing	Blurred Vision	NA	NA	1	Event Description: THE REPORTER INDICATED THAT A 12.6MM, VICM5_12.6, -9.50 DIOPTER, IMPLANTABLE COLLAMER LENS WAS IMPLANTED INTO THE PATIENTS LEFT EYE (OS) ON (B)(6) 2021. ON (B)(6) 2021 THE LENS WAS EXPLANTED DUE TO REFRACTIVE SURPRISE. A REPLACEMENT LENS OF DIFFERENT POWER WAS LATER IMPLANTED. IF ADDITIONAL INFORMATION IS RECEIVED A SUPPLEMENTAL MEDWATCH REPORT WILL BE SUBMITTED. Manufacturer N…	Lens Exchange	Resolved
https://www.accessdata.fda.gov/scripts/cdrh/cfdocs/cfMAUDE/Detail.CFM?MDRFOI__ID=12257193&pc=MTA	2023826-2021-02977	2021-05-27	Injury	STAAR SURGICAL COMPANY	2021-07-31	MTA	IMPLANTABLE COLLAMER LENS (ICL)	Misfocusing	Blurred Vision	NA	NA	1	Event Description: THE REPORTER INDICATED THE SURGEON IMPLANTED A 12.6MM VICMO12.6 IMPLANTABLE COLLAMER LENS, -05.50 DIOPTER, IN THE PATIENTS LEFT EYE (OS), ON (B)(6) 2021. THE LENS WAS EXPLANTED ON (B)(6) 2021 DUE TO THE PATIENT EXPERIENCED BLURRED VISION. THE SURGEON DID NOT IMPLANT ANOTHER ICL LENS. THE CAUSE OF THE EVENT WAS DUE TO PATIENT RELATED FACTOR. Manufacturer Narrative: THIS PRODUCT …	Lens Extraction	Unknown
https://www.accessdata.fda.gov/scripts/cdrh/cfdocs/cfMAUDE/Detail.CFM?MDRFOI__ID=12524316&pc=MTA	2023826-2021-03722	2021-05-28	Injury	STAAR SURGICAL COMPANY	2021-09-24	MTA	IMPLANTABLE COLLAMER LENS (ICL)	Misfocusing	Blurred Vision	NA	NA	1	Event Description: THE REPORTER INDICATED THAT A 13.7MM, VICMO13.7 -10.0 DIOPTER, IMPLANTABLE COLLAMER LENS WAS IMPLANTED INTO THE PATIENTS LEFT EYE (OS) ON (B)(6) 2021. ON (B)(6) 2021 THE LENS WAS EXCHANGED FOR A DIFFERENT MODEL AND DIOPTER LENS DUE TO REFRACTIVE SURPRISE. THIS EXCHANGE RESOLVED THE PROBLEM. CAUSE OF EVENT UNKNOWN. Manufacturer Narrative: H3: DEVICE EVALUATION:LENS WAS RETURNED …	Lens Exchange	Resolved
https://www.accessdata.fda.gov/scripts/cdrh/cfdocs/cfMAUDE/Detail.CFM?MDRFOI__ID=12170553&pc=MTA	2023826-2021-02698	2021-06-04	Injury	STAAR SURGICAL COMPANY	2021-07-14	MTA	IMPLANTABLE COLLAMER LENS (ICL)	Misfocusing	Blurred Vision	NA	NA	1	Event Description: THE REPORTER INDICATED THAT A 12.6MM VICMO12.6; -12.0 DIOPTER IMPLANTABLE COLLAMER LENS WAS IMPLANTED INTO THE PATIENT'S RIGHT EYE (OD) ON (B)(6) 2021. THE PATIENT EXPERIENCED REFRACTIVE SURPRISE. ON (B)(6) 2021 THE LENS WAS EXCHANGED WITH A SAME MODEL/LENGTH LENS BUT DIFFERENT DIOPTER AND THIS RESOLVED THE PROBLEM. CAUSE OF THE EVENT WAS REPORTED AS UNKNOWN. Manufacturer Narra…	Lens Exchange	Resolved
https://www.accessdata.fda.gov/scripts/cdrh/cfdocs/cfMAUDE/Detail.CFM?MDRFOI__ID=12222316&pc=MTA	2023826-2021-02809	2021-06-08	Injury	STAAR SURGICAL COMPANY	2021-07-23	MTA	IMPLANTABLE COLLAMER LENS	Misfocusing	Blurred Vision	NA	NA	1	Event Description: THE REPORTER INDICATED THAT THE SURGEON IMPLANTED A 12.6MM VICMO12.6 IMPLANTABLE COLLAMER LENS, -16.5 DIOPTER INTO THE PATIENT'S RIGHT EYE (OD) ON (B)(6) 2021. REPORTEDLY, THE LENS WAS EXCHANGED ON (B)(6) 2021 WITH A SAME SIZE DIFFERENT DIOPTER LENS DUE TO REFRACTIVE SURPRISE. THE PROBLEM WAS RESOLVED. THE CAUSE OF THE EVENT IS REPORTED AS UNKNOWN. Manufacturer Narrative: ADDIT…	Lens Exchange	Resolved
https://www.accessdata.fda.gov/scripts/cdrh/cfdocs/cfMAUDE/Detail.CFM?MDRFOI__ID=12872779&pc=MTA	2023826-2021-04511	2021-06-12	Malfunction	STAAR SURGICAL COMPANY	2021-11-24	MTA	IMPLANTABLE COLLAMER LENS (ICL)	Misfocusing	Blurred Vision	NA	NA	1	Event Description: THE REPORTER INDICATED THAT A 13.2MM, VICMO_13.2, -9.00 DIOPTER, IMPLANTABLE COLLAMER LENS WAS IMPLANTED INTO THE PATIENTS RIGHT EYE (OD) ON (B)(6) 2021. REFRACTIVE SURPRISE WAS OBSERVED, LENS REMAINS IMPLANTED. IN THE REPORTERS OPINION THE CAUSE OF THIS EVENT WAS "OTHER", FOR CAUSE DETAILS THE REPORTER STATED " WRONG REFRACTION BY OPTOMETRIST." IT WAS REPORTED THAT THERE WAS A…	Lens Retention	Unknown
https://www.accessdata.fda.gov/scripts/cdrh/cfdocs/cfMAUDE/Detail.CFM?MDRFOI__ID=12178441&pc=MTA	2023826-2021-02712	2021-06-15	Injury	STAAR SURGICAL COMPANY	2021-07-15	MTA	IMPLANTABLE COLLAMER LENS	Misfocusing	Blurred Vision	NA	NA	1	Event Description: THE REPORTER INDICATED THAT THE SURGEON IMPLANTED A 12.6MM VICM5_12.6 IMPLANTABLE COLLAMER LENS, -8.0 DIOPTER INTO THE PATIENT'S RIGHT EYE (OD) ON (B)(6) 2021. REPORTEDLY, THE LENS WAS EXCHANGED ON (B)(6) 2021 WITH A SAME SIZE, DIFFERENT DIOPTER LENS DUE TO REFRACTIVE SURPRISE. THE PROBLEM WAS RESOLVED. THE CAUSE OF THE EVENT IS REPORTED AS UNKNOWN. Manufacturer Narrative: H3 -…	Lens Exchange	Resolved
https://www.accessdata.fda.gov/scripts/cdrh/cfdocs/cfMAUDE/Detail.CFM?MDRFOI__ID=12644985&pc=MTA	2023826-2021-04019	2021-06-16	Injury	STAAR SURGICAL COMPANY	2021-10-18	MTA	IMPLANTABLE COLLAMER LENS (ICL)	Misfocusing	Blurred Vision	NA	NA	1	Event Description: THE REPORTER INDICATED THAT A 12.6MM, VICM6_12.6,-8.50 DIOPTER, IMPLANTABLE COLLAMER LENS WAS IMPLANTED INTO THE PATIENTS RIGHT EYE (OD) ON (B)(6) 2021. REFRACTIVE SURPRISE WAS REPORTED, LENS REMAINS IMPLANTED. FOR PATIENTS CURRENT CONDITION "FAR SIGHT NOT GOOD" WAS REPORTED. IN THE REPORTERS OPINION THE DEVICE WAS THE CAUSE OF THIS EVENT, FOR CAUSE DETAILS THE REPORTED STATED …	Lens Exchange	Resolved
https://www.accessdata.fda.gov/scripts/cdrh/cfdocs/cfMAUDE/Detail.CFM?MDRFOI__ID=12378568&pc=MTA	2023826-2021-03363	2021-06-17	Injury	STAAR SURGICAL COMPANY	2021-08-27	MTA	IMPLANTABLE COLLAMER LENS	Misfocusing	Blurred Vision	NA	NA	1	Event Description: THE REPORTER INDICATED THAT THE SURGEON IMPLANTED A 12.6MM VICMO12.6 IMPLANTABLE COLLAMER LENS, -9.5 DIOPTER, INTO THE PATIENT'S LEFT EYE (OS) ON (B)(6) 2021. ON (B)(6) 2021 THE LENS WAS EXCHANGED WITH A SAME SIZE DIFFERENT DIOPTER LENS-BOTH REFRACTIVE CHANGE OVER TIME AND REFRACTIVE SURPRISE ARE REPORTED. THE PROBLEM WAS RESOLVED. THE CAUSE OF THE EVENT IS REPORTED AS UNKNOWN.…	Lens Exchange	Resolved
https://www.accessdata.fda.gov/scripts/cdrh/cfdocs/cfMAUDE/Detail.CFM?MDRFOI__ID=12222324&pc=MTA	2023826-2021-02814	2021-06-29	Malfunction	STAAR SURGICAL COMPANY	2021-07-23	MTA	IMPLANTABLE COLLAMER LENS (ICL)	Misfocusing	Blurred Vision	N/A	NA	1	Event Description: THE REPORTER INDICATED THE SURGEON IMPLANTED A 12.6MM VICM5_12.6 IMPLANTABLE COLLAMER LENS, -8.5 DIOPTER INTO THE PATIENT'S LEFT EYE (OS) ON (B)(6) 2021. THE SURGEON REPORTS REFRACTIVE SURPRISE. Manufacturer Narrative: WEIGHT, ETHNICITY, RACE-UNK. PMA/510(K): THIS PRODUCT IS MANUFACTURED IN THE U.S. BUT NOT MARKETED IN THE U.S. (B)(4).	Unknown	Unknown
https://www.accessdata.fda.gov/scripts/cdrh/cfdocs/cfMAUDE/Detail.CFM?MDRFOI__ID=12725063&pc=MTA	2023826-2021-04166	2021-07-25	Injury	STAAR SURGICAL COMPANY	2021-10-30	MTA	IMPLANTABLE COLLAMER LENS (ICL)	Misfocusing	Blurred Vision	NA	NA	1	Event Description: THE REPORTER INDICATED THAT A 12.1MM, VICMO12.1, -8.5 DIOPTER, IMPLANTABLE COLLAMER LENS WAS IMPLANTED INTO THE PATIENTS LEFT EYE (OS) ON (B)(6) 2021. ON (B)(6) 2021 THE LENS WAS EXCHANGED FOR A DIFFERENT MODEL AND POWER LENS DUE TO REFRACTIVE SURPRISE. THIS EXCHANGE RESOLVED THE PROBLEM. CAUSE OF EVENT WAS UNKNOWN. Manufacturer Narrative: H3- DEVICE EVALUATION: THE LENS WAS RE…	Lens Exchange	Resolved
https://www.accessdata.fda.gov/scripts/cdrh/cfdocs/cfMAUDE/Detail.CFM?MDRFOI__ID=13082453&pc=MTA	2023826-2021-04969	2021-08-01	Injury	STAAR SURGICAL COMPANY	2021-12-23	MTA	IMPLANTABLE COLLAMER LENS	Misfocusing	Blurred Vision	NA	NA	1	Event Description: THE REPORTER INDICATED THAT THE SURGEON IMPLANTED A 12.1MM VICM5_12.1 IMPLANTABLE COLLAMER LENS, -12.5 DIOPTER INTO THE PATIENT'S LEFT EYE (OS) ON (B)(6) 2021. REPORTEDLY, THE LENS WAS EXCHANGED ON (B)(6) 2021 WITH A LONGER LENGTH, DIFFERENT SIZE LENS DUE TO REFRACTIVE SURPRISE. THE PROBLEM WAS RESOLVED. THE CAUSE OF THE EVENT IS REPORTED AS UNKNOWN. Manufacturer Narrative: PT …	Lens Exchange	Resolved
https://www.accessdata.fda.gov/scripts/cdrh/cfdocs/cfMAUDE/Detail.CFM?MDRFOI__ID=12725238&pc=MTA	2023826-2021-04178	2021-08-18	Injury	STAAR SURGICAL COMPANY	2021-10-30	MTA	IMPLANTABLE COLLAMER LENS (ICL)	Misfocusing	Blurred Vision	NA	NA	1	Event Description: THE REPORTER INDICATED THAT A 13.2MM, VICM5_13.2, -10.00 DIOPTER IMPLANTABLE COLLAMER LENS WAS IMPLANTED INTO THE PATIENTS LEFT EYE (OS) ON (B)(6) 2021. ON (B)(6) 2021 THE LENS WAS EXCHANGED FOR A DIFFERENT POWER LENS DUE TO REFRACTIVE SURPRISE. THIS EXCHANGE RESOLVED THE PROBLEM. CAUSE OF EVENT WAS UNKNOWN. Manufacturer Narrative: H3- DEVICE EVALUATION: THE LENS WAS RETURNED I…	Lens Exchange	Resolved
https://www.accessdata.fda.gov/scripts/cdrh/cfdocs/cfMAUDE/Detail.CFM?MDRFOI__ID=12566510&pc=MTA	2023826-2021-03842	2021-08-27	Injury	STAAR SURGICAL COMPANY	2021-10-03	MTA	IMPLANTABLE COLLAMER LENS (ICL)	Misfocusing	Blurred Vision	NA	NA	1	Event Description: THE REPORTER INDICATED THAT A 12.6MM, VICM5_12.6, -13.00 DIOPTER, IMPLANTABLE COLLAMER LENS WAS IMPLANTED INTO THE PATIENTS LEFT EYE (OS) ON (B)(6) 2021. ON (B)(6) 2021 THE LENS WAS EXCHANGED WITH A DIFFERENT MODEL AND POWER LENS DUE TO REFRACTIVE SURPRISE. THIS EXCHANGE RESOLVED THE PROBLEM. CAUSE OF EVENT WAS UNKNOWN. Manufacturer Narrative: WEIGHT: UNK, ETHNICITY: UNK, RACE:…	Lens Exchange	Resolved
https://www.accessdata.fda.gov/scripts/cdrh/cfdocs/cfMAUDE/Detail.CFM?MDRFOI__ID=12523480&pc=MTA	2023826-2021-03690	2021-09-01	Malfunction	STAAR SURGICAL COMPANY	2021-09-23	MTA	IMPLANTABLE COLLAMER LENS	Misfocusing	Blurred Vision	P030016	NA	1	Event Description: THE REPORTER STATES A 12.6MM MICL12.6 IMPLANTABLE COLLAMER LENS -13.5 DIOPTER WAS IMPLANTED INTO THE PATIENT'S LEFT (OS) EYE ON (B)(6) 2021. THE SURGEON REPORTS REFRACTIVE ERROR. Manufacturer Narrative: B5-UPDATED INFORMATION: ON (B)(6) 2021 THE LENS WAS EXPLANTED AND THEN REPLACED WITH A SAME SIZE DIFFERENT DIOPTER LENS DUE TO REFRACTIVE SURPRISE AND BLURRED VISION. THE CAUSE …	Lens Exchange	Unknown
https://www.accessdata.fda.gov/scripts/cdrh/cfdocs/cfMAUDE/Detail.CFM?MDRFOI__ID=12725195&pc=MTA	2023826-2021-04172	2021-09-17	Injury	STAAR SURGICAL COMPANY	2021-10-30	MTA	IMPLANTABLE COLLAMER LENS (ICL)	Misfocusing	Blurred Vision	NA	NA	1	Event Description: THE REPORTER INDICATED THAT A 12.1MM, VICMO12.1, -14.50 DIOPTER IMPLANTABLE COLLAMER LENS WAS IMPLANTED INTO THE PATIENTS LEFT EYE (OS) ON (B)(6) 2021. ON (B)(6) 2021 THE LENS WAS EXCHANGED FOR A DIFFERENT LENGTH AND POWER LENS DUE TO REFRACTIVE SURPRISE. THIS EXCHANGE RESOLVED THE PROBLEM. CAUSE OF EVENT WAS UNKNOWN. Manufacturer Narrative: H3- DEVICE EVALUATION: THE LENS WAS …	Lens Exchange	Resolved
https://www.accessdata.fda.gov/scripts/cdrh/cfdocs/cfMAUDE/Detail.CFM?MDRFOI__ID=12909815&pc=MTA	2023826-2021-04616	2021-09-21	Injury	STAAR SURGICAL COMPANY	2021-12-01	MTA	IMPLANTABLE COLLAMER LENS (ICL)	Misfocusing	Blurred Vision	NA	NA	1	Event Description: THE REPORTER INDICATED THAT THE SURGEON IMPLANTED A 13.2MM VICMO13.2; -3.5 DIOPTER IMPLANTABLE COLLAMER LENS INTO THE PATIENT'S LEFT EYE (OS) ON (B)(6) 2021. ON (B)(6) 2021 THE LENS WAS EXCHANGED WITH A SAME LENGTH BUT DIFFERENT MODEL AND POWER LENS DUE TO REFRACTIVE SURPRISE. THIS RESOLVED THE PROBLEM. THE CAUSE OF THE EVENT WAS REPORTED AS UNKNOWN. Manufacturer Narrative: H3 …	Lens Exchange	Resolved
https://www.accessdata.fda.gov/scripts/cdrh/cfdocs/cfMAUDE/Detail.CFM?MDRFOI__ID=12840513&pc=MTA	2023826-2021-04393	2021-09-25	Injury	STAAR SURGICAL COMPANY	2021-11-18	MTA	IMPLANTABLE COLLAMER LENS	Misfocusing	Blurred Vision	NA	NA	1	Event Description: THE REPORTER INDICATED THAT THE SURGEON IMPLANTED A 13.2MM VICMO13.2 IMPLANTABLE COLLAMER LENS, -3.5 DIOPTER INTO THE PATIENT'S RIGHT EYE (OD) ON (B)(6) 2021. REPORTEDLY, THE LENS WAS EXCHANGED ON (B)(6) 2021 WITH A SAME SIZE DIFFERENT DIOPTER LENS DUE TO REFRACTIVE SURPRISE. THE PROBLEM WAS RESOLVED. THE CAUSE OF THE EVENT IS REPORTED AS UNKNOWN. Manufacturer Narrative: PT INF…	Lens Exchange	Resolved
https://www.accessdata.fda.gov/scripts/cdrh/cfdocs/cfMAUDE/Detail.CFM?MDRFOI__ID=14246071&pc=MTA	2023826-2022-01311	2021-09-26	Injury	STAAR SURGICAL COMPANY	2022-04-28	MTA	IMPLANTABLE COLLAMER LENS (ICL)	Misfocusing	Blurred Vision	NA	NA	1	Event Description: THE REPORTER INDICATED THAT A 12.1MM VICM5_12.1 IMPLANTABLE COLLAMER LENS OF -6.0 DIOPTER WAS IMPLANTED INTO THE PATIENT'S RIGHT EYE (OD) ON (B)(6) 2021. ON (B)(6) 2022 THE LENS WAS EXCHANGED WITH A DIFFERENT POWER LENS DUE TO REFRACTIVE SURPRISE. THE EXCHANGE RESOLVED THE PROBLEM. CAUSE IS REPORTED AS UNKNOWN. Manufacturer Narrative: WEIGHT-RACE: UNK. PMA/510(K): THIS PRODUCT …	Lens Exchange	Resolved
https://www.accessdata.fda.gov/scripts/cdrh/cfdocs/cfMAUDE/Detail.CFM?MDRFOI__ID=14246554&pc=MTA	2023826-2022-01312	2021-09-26	Injury	STAAR SURGICAL COMPANY	2022-04-28	MTA	IMPLANTABLE COLLAMER LENS (ICL)	Misfocusing	Blurred Vision	NA	NA	1	Event Description: THE REPORTER INDICATED THAT A 12.1MM VICM5_12.1 IMPLANTABLE COLLAMER LENS OF -6.0 DIOPTER WAS IMPLANTED INTO THE PATIENT'S LEFT EYE (OS) ON (B)(6) 2021. ON (B)(6) 2022 THE LENS WAS EXCHANGED WITH A DIFFERENT POWER LENS DUE TO REFRACTIVE SURPRISE. THE EXCHANGE RESOLVED THE PROBLEM. CAUSE IS REPORTED AS UNKNOWN. Manufacturer Narrative: H3: DEVICE EVALUATION: LENS WAS RETURNED IN …	Lens Exchange	Resolved
https://www.accessdata.fda.gov/scripts/cdrh/cfdocs/cfMAUDE/Detail.CFM?MDRFOI__ID=14659120&pc=MTA	2023826-2022-01745	2021-10-09	Injury	STAAR SURGICAL COMPANY	2022-06-10	MTA	IMPLANTABLE COLLAMER LENS (ICL)	Misfocusing	Blurred Vision	P030016	NA	1	Event Description: THE REPORTER INDICATED THAT A 12.1MM VICM5_12.1 IMPLANTABLE COLLAMER LENS OF -4.5 DIOPTER WAS IMPLANTED INTO THE PATIENT'S RIGHT EYE (OD) ON (B)(6) 2021. ON (B)(6) 2022 THE LENS WAS EXCHANGED WITH AN IDENTICAL LENS OF DIFFERENT DIOPTER DUE TO REFRACTIVE SURPRISE. THE EXCHANGE RESOLVED THE PROBLEM. Manufacturer Narrative: H3 DEVICE EVALUATION: THE LENS WAS RETURNED IN LIQUID IN …	Lens Exchange	Resolved
https://www.accessdata.fda.gov/scripts/cdrh/cfdocs/cfMAUDE/Detail.CFM?MDRFOI__ID=13146229&pc=MTA	2023826-2022-00053	2021-10-12	Injury	STAAR SURGICAL COMPANY	2022-01-03	MTA	IMPLANTABLE COLLAMER LENS (ICL)	Misfocusing	Blurred Vision	NA	NA	1	Event Description: THE REPORTER INDICATED THAT THE SURGEON IMPLANTED A 12.6MM VICM5_12.6; -4.0 DIOPTER IMPLANTABLE COLLAMER LENS INTO THE PATIENT'S LEFT EYE (OS) ON (B)(6) 2021. THE PATIENT EXPERIENCE REFRACTIVE SURPRISE. ON (B)(6) 2021, THE LENS WAS EXCHANGED WITH A SAME MODEL/LENGTH BUT DIFFERENT DIOPTER LENS AND THIS RESOLVED THE PROBLEM. THE CAUSE OF THE EVENT WAS REPORTED AS "OTHER, REFRACTI…	Lens Exchange	Resolved
https://www.accessdata.fda.gov/scripts/cdrh/cfdocs/cfMAUDE/Detail.CFM?MDRFOI__ID=13911555&pc=MTA	2023826-2022-00961	2021-10-12	Injury	STAAR SURGICAL COMPANY	2022-03-25	MTA	IMPLANTABLE COLLAMER LENS	Misfocusing	Blurred Vision	NA	NA	1	Event Description: THE REPORTER INDICATED THAT THE SURGEON IMPLANTED A 12.1MM VICMO12.1 IMPLANTABLE COLLAMER LENS -15.0 DIOPTER INTO THE PATIENT'S LEFT EYE (OS) ON (B)(6) 2021. ON (B)(6) 2021 WITH A SAME SIZE DIFFERENT DIOPTER LENS DUE TO REFRACTIVE SURPRISE. THE PROBLEM WAS RESOLVED. THE CAUSE OF THE EVENT IS REPORTED AS UNKNOWN. Manufacturer Narrative: WEIGHT, ETHNICITY, RACE-UNK. PMA/510(K): T…	Lens Exchange	Resolved
https://www.accessdata.fda.gov/scripts/cdrh/cfdocs/cfMAUDE/Detail.CFM?MDRFOI__ID=13182540&pc=MTA	2023826-2022-00029	2021-10-25	Injury	STAAR SURGICAL COMPANY	2022-01-06	MTA	IMPLANTABLE COLLAMER LENS	Misfocusing	Blurred Vision	NA	NA	1	Event Description: THE REPORTER INDICATED THAT THE SURGEON IMPLANTED A 13.2MM VICMO13.2 IMPLANTABLE COLLAMER LENS, -16.5 DIOPTER INTO THE PATIENT'S RIGHT EYE (OD) ON (B)(6) 2021. REPORTEDLY, THE LENS WAS EXCHANGED ON (B)(6) 2021 WITH A SAME SIZE DIFFERENT DIOPTER LENS DUE TO REFRACTIVE SURPRISE. THE PROBLEM WAS RESOLVED. THE CAUSE OF THE EVENT IS REPORTED AS UNKNOWN. Manufacturer Narrative: WEIGH…	Lens Exchange	Resolved
https://www.accessdata.fda.gov/scripts/cdrh/cfdocs/cfMAUDE/Detail.CFM?MDRFOI__ID=13182541&pc=MTA	2023826-2022-00030	2021-10-25	Injury	STAAR SURGICAL COMPANY	2022-01-06	MTA	IMPLANTABLE COLLAMER LENS	Misfocusing	Blurred Vision	NA	NA	1	Event Description: THE REPORTER INDICATED THAT THE SURGEON IMPLANTED A 13.2MM VICMO13.2 IMPLANTABLE COLLAMER LENS, -16.0 DIOPTER INTO THE PATIENT'S LEFT EYE (OS) ON (B)(6) 2021. REPORTEDLY, THE LENS WAS EXCHANGED ON (B)(6) 2021 WITH A SAME SIZE DIFFERENT MODEL LENS DUE TO REFRACTIVE SURPRISE. THE PROBLEM WAS RESOLVED. THE CAUSE OF THE EVENT IS REPORTED AS UNKNOWN. REPORTEDLY THE LENS WAS REPLACED…	Lens Exchange	Resolved
https://www.accessdata.fda.gov/scripts/cdrh/cfdocs/cfMAUDE/Detail.CFM?MDRFOI__ID=13983927&pc=MTA	2023826-2022-01048	2021-10-27	Malfunction	STAAR SURGICAL COMPANY	2022-04-01	MTA	IMPLANTABLE COLLAMER LENS (ICL)	Misfocusing	Blurred Vision	NA	NA	1	Event Description: THE REPORTER INDICATED THAT A 12.6MM VICM5_12.6 IMPLANTABLE COLLAMER LENS OF -2.75 DIOPTER WAS IMPLANTED INTO THE PATIENT'S LEFT EYE (OS) ON (B)(6) 2021. THE PATIENT EXPERIENCED REFRACTIVE SURPRISE, LENS REMAINS IMPLANTED. IT WAS REPORTED THAT THE PATIENT IS WEARING GLASSES. IN THE REPORTERS OPINION THE CAUSE OF THIS EVENT IS THE DEVICE. IF ADDITIONAL INFORMATION IS RECEIVED A …	Lens Retention	Unknown
https://www.accessdata.fda.gov/scripts/cdrh/cfdocs/cfMAUDE/Detail.CFM?MDRFOI__ID=12973349&pc=MTA	2023826-2021-04699	2021-11-08	Injury	STAAR SURGICAL COMPANY	2021-12-09	MTA	IMPLANTABLE COLLAMER LENS (ICL)	Misfocusing	Blurred Vision	N/A	NA	1	Event Description: THE REPORTER INDICATED THE SURGEON IMPLANTED A 12.6MM VICM5_12.6 IMPLANTABLE COLLAMER LENS, -6.5 DIOPTER INTO THE PATIENT'S LEFT EYE (OS) ON (B)(6) 2021. THE SURGEON REPORTS REFRACTIVE SURPRISE. THE CAUSE OF THE EVENT IS REPORTED AS OTHER: "ASTIGMATISM AND KERATOMETRY FROM THE START." THE REPORTER STATES THAT POSSIBLY THE SURGEON UNDERESTIMATED THE ASTIGMATISM-KERATOMETRY GIVES…	Lens Exchange	Resolved
https://www.accessdata.fda.gov/scripts/cdrh/cfdocs/cfMAUDE/Detail.CFM?MDRFOI__ID=13459224&pc=MTA	2023826-2022-00389	2021-11-19	Injury	STAAR SURGICAL COMPANY	2022-02-04	MTA	IMPLANTABLE COLLAMER LENS (ICL)	Misfocusing	Blurred Vision	N/A	NA	1	Event Description: THE REPORTER INDICATED THE SURGEON IMPLANTED A 12.6MM VICMO12.6 IMPLANTABLE COLLAMER LENS, DIOPTER -9.0 INTO THE PATIENT'S LEFT EYE (OS) ON (B)(6) 2021. ON (B)(6) 2021 THE LENS WAS EXCHANGED WITH A SAME SIZE DIFFERENT MODEL LENS DUE TO BLURRED VISION. THE CAUSE OF THE EVENT IS REPORTED AS UNKNOWN. SEE MFR REP# 2023826-2022-00392 FOR REPLACEMENT LENS. Manufacturer Narrative: WEI…	Lens Exchange	Unknown
https://www.accessdata.fda.gov/scripts/cdrh/cfdocs/cfMAUDE/Detail.CFM?MDRFOI__ID=13317681&pc=MTA	2023826-2022-00204	2021-11-24	Injury	STAAR SURGICAL COMPANY	2022-01-21	MTA	IMPLANTABLE COLLAMER LENS	Misfocusing	Blurred Vision	NA	NA	1	Event Description: THE REPORTER INDICATED THAT THE SURGEON IMPLANTED A 12.6MM VICMO12.6 IMPLANTABLE COLLAMER LENS -14.0 DIOPTER INTO THE PATIENT'S RIGHT EYE (OD) ON (B)(6) 2021. REPORTEDLY, THE LENS WAS EXCHANGED ON (B)(6) 2021 WITH A SAME SIZE DIFFERENT DIOPTER LENS DUE TO REFRACTIVE SURPRISE. THE PROBLEM WAS RESOLVED. THE CAUSE OF THE EVENT IS REPORTED AS UNKNOWN. Manufacturer Narrative: H3- DE…	Lens Exchange	Resolved
https://www.accessdata.fda.gov/scripts/cdrh/cfdocs/cfMAUDE/Detail.CFM?MDRFOI__ID=14862585&pc=MTA	2023826-2022-01899	2021-11-24	Injury	STAAR SURGICAL COMPANY	2022-06-29	MTA	IMPLANTABLE COLLAMER LENS (ICL)	Misfocusing	Blurred Vision	P030016	NA	1	Event Description: THE REPORTER INDICATED THAT A 12.1MM VICM5_12.1 IMPLANTABLE COLLAMER LENS OF -5.5 DIOPTER WAS IMPLANTED INTO THE PATIENT'S RIGHT EYE (OD) ON (B)(6) 2021. ON (B)(6) 2021 THE LENS WAS EXCHANGED WITH A LONGER LENS OF DIFFERENT DIOPTER DUE TO REFRACTIVE SURPRISE. THE EXCHANGE RESOLVED THE PROBLEM. Manufacturer Narrative: LENS WORK ORDER SEARCH: NO SIMILAR COMPLAINTS REPORTED FOR UN…	Lens Exchange	Resolved
https://www.accessdata.fda.gov/scripts/cdrh/cfdocs/cfMAUDE/Detail.CFM?MDRFOI__ID=13173031&pc=MTA	2023826-2022-00099	2021-12-06	Injury	STAAR SURGICAL COMPANY	2022-01-05	MTA	IMPLANTABLE COLLAMER LENS (ICL)	Misfocusing	Blurred Vision	NA	NA	1	Event Description: THE REPORTER INDICATED THAT THE SURGEON IMPLANTED A 13.7MM VICMO13.7; -15.5 DIOPTER IMPLANTABLE COLLAMER LENS INTO THE PATIENT'S LEFT EYE (OS) ON (B)(6) 2021. THE PATIENT EXPERIENCED REFRACTIVE SURPRISE AND ALSO REFRACTIVE CHANGE OVER TIME. ON (B)(6) 2021 THE LENS WAS EXCHANGED WITH A SAME LENGTH BUT DIFFERENT MODEL/POWER LENS AND THIS RESOLVED THE PROBLEM. THE CAUSE OF THE EVE…	Lens Exchange	Resolved
https://www.accessdata.fda.gov/scripts/cdrh/cfdocs/cfMAUDE/Detail.CFM?MDRFOI__ID=15738720&pc=MTA	2023826-2022-03992	2021-12-13	Injury	STAAR SURGICAL COMPANY	2022-11-04	MTA	IMPLANTABLE COLLAMER LENS (ICL)	Misfocusing	Blurred Vision	P030016	NA	1	Event Description: THE REPORTER INDICATED THAT THE SURGEON IMPLANTED A 13.2MM VICM5_13.2; -5.50 DIOPTER IMPLANTABLE COLLAMER LENS INTO THE PATIENT'S RIGHT EYE (OD) ON (B)(6) 2021. IT WAS INDICATED THE PATIENT HAD PERMANENT LOSS OF BCVA AND BLURRED VISION. THE CAUSE OF THE EVENT WAS REPORTED AS "OTHER" AND NOTED "RESIDUAL ASTIGMATISM REMAINS". THE LENS WAS EXPLANTED. ON (B)(6) 2022 A REPLACEMENT L…	Lens Exchange	Resolved
https://www.accessdata.fda.gov/scripts/cdrh/cfdocs/cfMAUDE/Detail.CFM?MDRFOI__ID=14862904&pc=MTA	2023826-2022-01905	2021-12-30	Injury	STAAR SURGICAL COMPANY	2022-06-29	MTA	IMPLANTABLE COLLAMER LENS (ICL)	Misfocusing	Blurred Vision	P030016	NA	1	Event Description: THE REPORTER INDICATED THAT A 12.1MM VICM5_12.1 IMPLANTABLE COLLAMER LENS OF -2.75 DIOPTER WAS IMPLANTED INTO THE PATIENT'S LEFT EYE (OS) ON (B)(6) 2021. ON (B)(6) 2022 THE LENS WAS EXCHANGED WITH A LENS OF DIFFERENT DIOPTER DUE TO REFRACTIVE SURPRISE. THE EXCHANGE RESOLVED THE PROBLEM. Manufacturer Narrative: (B)(4). Manufacturer Narrative: DEVICE EVALUATION: H3 - DEVICE EVALU…	Lens Exchange	Resolved
https://www.accessdata.fda.gov/scripts/cdrh/cfdocs/cfMAUDE/Detail.CFM?MDRFOI__ID=13981610&pc=MTA	2023826-2022-01046	2022-01-05	Injury	STAAR SURGICAL COMPANY	2022-04-01	MTA	IMPLANTABLE COLLAMER LENS (ICL)	Misfocusing	Blurred Vision	NA	NA	1	Event Description: THE REPORTER INDICATED THAT A 12.6MM VICM5_12.6 IMPLANTABLE COLLAMER LENS OF -5.0 DIOPTER WAS IMPLANTED INTO THE PATIENT'S RIGHT EYE (OD) ON (B)(6) 2021. ON (B)(6) 2022 THE LENS WAS EXCHANGED WITH A DIFFERENT DIOPTER LENS DUE TO REFRACTIVE SURPRISE. THE EXCHANGE RESOLVED THE PROBLEM. CAUSE IS REPORTED AS UNKNOWN. Manufacturer Narrative: THIS PRODUCT IS NOT MARKETED IN THE U.S. …	Lens Exchange	Resolved
https://www.accessdata.fda.gov/scripts/cdrh/cfdocs/cfMAUDE/Detail.CFM?MDRFOI__ID=13998315&pc=MTA	2023826-2022-00978	2022-01-15	Injury	STAAR SURGICAL COMPANY	2022-04-04	MTA	IMPLANTABLE COLLAMER LENS (ICL)	Misfocusing	Blurred Vision	NA	NA	1	Event Description: THE REPORTER INDICATED THAT A 12.6MM VICMO12.6 IMPLANTABLE COLLAMER LENS OF -3.5 DIOPTER WAS IMPLANTED INTO THE PATIENT'S LEFT EYE (OS) ON (B)(6) 2021. ON (B)(6) 2022 THE LENS WAS EXCHANGED WITH A NEW MODEL LENS OF DIFFERENT DIOPTER DUE TO REFRACTIVE SURPRISE AND GHOSTING. THE EXCHANGE RESOLVED THE PROBLEM. CAUSE IS REPORTED AS UNKNOWN. Manufacturer Narrative: H3 - DEVICE EVALU…	Lens Exchange	Resolved
https://www.accessdata.fda.gov/scripts/cdrh/cfdocs/cfMAUDE/Detail.CFM?MDRFOI__ID=14862403&pc=MTA	2023826-2022-02091	2022-02-03	Injury	STAAR SURGICAL COMPANY	2022-06-29	MTA	IMPLANTABLE COLLAMER LENS (ICL)	Misfocusing	Blurred Vision	P030016	NA	1	Event Description: THE REPORTER INDICATED THAT THE SURGEON IMPLANTED A 12.6MM VICM5_12.6; -8.00 DIOPTER IMPLANTABLE COLLAMER LENS INTO THE PATIENT'S LEFT EYE (OS) ON (B)(6) 2022. THE PATIENT EXPERIENCED REFRACTIVE SURPRISE. ON (B)(6) 2022 THE LENS WAS EXCHANGED WITH A SAME MODEL/LENGTH LENS BUT DIFFERENT POWER. THIS RESOLVED THE PROBLEM. Manufacturer Narrative: H3 - DEVICE EVALUATION: LENS WAS RE…	Lens Exchange	Resolved
https://www.accessdata.fda.gov/scripts/cdrh/cfdocs/cfMAUDE/Detail.CFM?MDRFOI__ID=14504752&pc=MTA	2023826-2022-01688	2022-02-09	Injury	STAAR SURGICAL COMPANY	2022-05-26	MTA	IMPLANTABLE COLLAMER LENS (ICL)	Misfocusing	Blurred Vision	P030016	NA	1	Event Description: THE REPORTER INDICATED THAT THE SURGEON IMPLANTED A 13.2MM VICMO13.2; -6.5 DIOPTER IMPLANTABLE COLLAMER LENS INTO THE PATIENT'S LEFT EYE (OS) ON (B)(6) 2020. THE PATIENT EXPERIENCED REFRACTIVE SURPRISE. ON (B)(6) 2022 THE LENS WAS EXCHANGED WITH A SAME SIZE BUT DIFFERENT POWER LENS AND THIS RESOLVED THE PROBLEM. THE CAUSE OF THE EVENT WAS REPORTED AS UNKNOWN. Manufacturer Narra…	Lens Exchange	Resolved
https://www.accessdata.fda.gov/scripts/cdrh/cfdocs/cfMAUDE/Detail.CFM?MDRFOI__ID=13795182&pc=MTA	2023826-2022-00797	2022-02-16	Malfunction	STAAR SURGICAL COMPANY	2022-03-17	MTA	IMPLANTABLE COLLAMER LENS (ICL)	Misfocusing	Blurred Vision	NA	NA	1	Event Description: THE REPORTER INDICATED THE SURGEON IMPLANTED A 13.2MM VICM6_13.2 IMPLANTABLE COLLAMER LENS, -09.00 DIOPTER, INTO THE PATIENTS RIGHT EYE (OD) ON (B)(6) 2021. THE PATIENT COMPLAINED OF BLURRY/FOGGY VISION WHEN THE LIGHT CONDITIONS GO FROM DARK TO LIGHT. THE LENS REMAINED IMPLANTED. THE CAUSE OF THE EVENT WAS UNKNOWN. ADDITIONAL INFORMATION HAS BEEN REQUESTED BUT NONE HAS BEEN FOR…	Lens Retention	Unknown
https://www.accessdata.fda.gov/scripts/cdrh/cfdocs/cfMAUDE/Detail.CFM?MDRFOI__ID=13944339&pc=MTA	2023826-2022-01025	2022-02-24	Injury	STAAR SURGICAL COMPANY	2022-03-29	MTA	IMPLANTABLE COLLAMER LENS (ICL)	Misfocusing	Blurred Vision	NA	NA	1	Event Description: THE REPORTER INDICATED THAT THE SURGEON IMPLANTED A 13.2MM VICM5_13.2; -8.00 DIOPTER IMPLANTABLE COLLAMER LENS INTO THE PATIENT'S LEFT EYE (OS) ON (B)(6) 2021. THE SURGEON REPORTS REFRACTIVE SURPRISE WITH A PLANNED LENS EXCHANGE. LENS REMAINS IMPLANTED. ATTEMPTS TO OBTAIN ADDITIONAL INFORMATION HAVE NOT BEEN SUCCESSFUL. IF ADDITIONAL INFORMATION IS RECEIVED A SUPPLEMENTAL MEDWA…	Lens Exchange	Not_Resolved
https://www.accessdata.fda.gov/scripts/cdrh/cfdocs/cfMAUDE/Detail.CFM?MDRFOI__ID=13944425&pc=MTA	2023826-2022-01024	2022-02-24	Injury	STAAR SURGICAL COMPANY	2022-03-29	MTA	IMPLANTABLE COLLAMER LENS (ICL)	Misfocusing	Blurred Vision	NA	NA	1	Event Description: THE REPORTED INDICATED THAT THE SURGEON IMPLANTED A 13.2MM VICM5_13.2; -8.00 DIOPTER IMPLANTABLE COLLAMER LENS INTO THE PATIENT'S RIGHT EYE (OD) ON (B)(4) 2021. THE SURGEON REPORTS REFRACTIVE SURPRISE WITH A PLANNED LENS EXCHANGE. LENS REMAINS IMPLANTED. ATTEMPTS TO OBTAIN ADDITIONAL INFORMATION HAVE NOT BEEN SUCCESSFUL. IF ADDITIONAL INFORMATION IS RECEIVED A SUPPLEMENTAL MEDW…	Lens Exchange	Resolved
https://www.accessdata.fda.gov/scripts/cdrh/cfdocs/cfMAUDE/Detail.CFM?MDRFOI__ID=14365578&pc=MTA	2023826-2022-01518	2022-02-25	Injury	STAAR SURGICAL COMPANY	2022-05-11	MTA	IMPLANTABLE COLLAMER LENS (ICL)	Misfocusing	Blurred Vision	P030016	NA	1	Event Description: THE REPORTER INDICATED THAT A 12.1MM VICM5 12.1 IMPLANTABLE COLLAMER LENS OF -8.50 DIOPTER WAS IMPLANTED INTO THE PATIENT'S LEFT EYE (OS) ON (B)(6) 2022. REFRACTIVE SURPRISE WAS OBSERVED. ON (B)(6) 2022 THE LENS WAS EXCHANGED FOR A SAME MODEL AND SIZE BUT -9.0 DIOPTER. THE EXCHANGE LENS RESOLVED THE PROBLEM. Manufacturer Narrative: H3 DEVICE EVALUATION: THE LENS WAS RETURNED DR…	Lens Exchange	Resolved
https://www.accessdata.fda.gov/scripts/cdrh/cfdocs/cfMAUDE/Detail.CFM?MDRFOI__ID=16720053&pc=MTA	2023826-2023-01357	2022-03-18	Injury	STAAR SURGICAL COMPANY	2023-04-11	MTA	IMPLANTABLE COLLAMER LENS (ICL)	Misfocusing	Blurred Vision	P030016	NA	1	Event Description: THE REPORTER INDICATED THAT THE SURGEON IMPLANTED A 12.1MM VICMO12.1; -9.0 DIOPTER IMPLANTABLE COLLAMER LENS INTO THE PATIENT'S RIGHT EYE (OD) ON (B)(6) 2022. THE PATIENT EXPERIENCED REFRACTIVE SURPRISE. ON 11-FEB-2023 THE LENS WAS EXCHANGED WITH THE SAME LENGTH LENS BUT TORIC MODEL. THIS RESOLVED THE PROBLEM. THE CAUSE OF THE EVENT WAS REPORTED AS UNKNOWN. Manufacturer Narrati…	Lens Exchange	Resolved
https://www.accessdata.fda.gov/scripts/cdrh/cfdocs/cfMAUDE/Detail.CFM?MDRFOI__ID=14220682&pc=MTA	2023826-2022-01098	2022-03-24	Malfunction	STAAR SURGICAL COMPANY	2022-04-27	MTA	IMPLANTABLE COLLAMER LENS (ICL)	Misfocusing	Blurred Vision	NA	NA	1	Event Description: THE REPORTER INDICATED THAT A 12.1MM VICM6_12.1 IMPLANTABLE COLLAMER LENS OF -7.00 DIOPTER WAS IMPLANTED INTO THE PATIENT'S RIGHT EYE (OD) ON (B)(6) 2022. REFRACTIVE SURPRISE REPORTED WITH -1.50 SPHERE RESIDUAL ERROR. LENS REMAINS IMPLANTED. CAUSE IS REPORTED AS UNKNOWN. Manufacturer Narrative: CLAIM# (B)(4).	Lens Retention	Unknown
https://www.accessdata.fda.gov/scripts/cdrh/cfdocs/cfMAUDE/Detail.CFM?MDRFOI__ID=14220740&pc=MTA	2023826-2022-01099	2022-03-24	Malfunction	STAAR SURGICAL COMPANY	2022-04-27	MTA	IMPLANTABLE COLLAMER LENS (ICL)	Misfocusing	Blurred Vision	NA	NA	1	Event Description: THE REPORTER INDICATED THAT A 12.1MM VICM6_12.1 IMPLANTABLE COLLAMER LENS OF -6.00 DIOPTER WAS IMPLANTED INTO THE PATIENT'S LEFT EYE (OS) ON (B)(6) 2022. REFRACTIVE SURPRISE REPORTED WITH -1.75 SPHERE RESIDUAL ERROR. LENS REMAINS IMPLANTED. CAUSE IS REPORTED AS UNKNOWN. Manufacturer Narrative: THIS PRODUCT IS NOT MARKETED IN THE US. CLAIM# (B)(4).	Lens Retention	Unknown
https://www.accessdata.fda.gov/scripts/cdrh/cfdocs/cfMAUDE/Detail.CFM?MDRFOI__ID=14862698&pc=MTA	2023826-2022-02025	2022-04-01	Injury	STAAR SURGICAL COMPANY	2022-06-29	MTA	IMPLANTABLE COLLAMER LENS (ICL)	Misfocusing	Blurred Vision	P030016	NA	1	Event Description: THE REPORTER INDICATED THAT A 13.2MM VICMO13.2 IMPLANTABLE COLLAMER LENS OF -15.5 DIOPTER WAS IMPLANTED INTO THE PATIENT'S LEFT EYE (OS) ON (B)(6) 2022. ON (B)(6) 2022 THE LENS WAS EXCHANGED WITH A SAME LENGTH LENS OF DIFFERENT DIOPTER DUE TO REFRACTIVE SURPRISE. THE EXCHANGE RESOLVED THE PROBLEM. CAUSE OF THE EVENT IS UNKNOWN. Manufacturer Narrative: H6: TYPE OF INVESTIGATION …	Lens Exchange	Resolved
https://www.accessdata.fda.gov/scripts/cdrh/cfdocs/cfMAUDE/Detail.CFM?MDRFOI__ID=15801811&pc=MTA	2023826-2022-03954	2022-04-04	Injury	STAAR SURGICAL COMPANY	2022-11-15	MTA	IMPLANTABLE COLLAMER LENS (ICL)	Misfocusing	Blurred Vision	P030016	NA	1	Event Description: THE REPORTER INDICATED THAT A 12.6MM VICM512.6 IMPLANTABLE COLLAMER LENS OF -7.5 DIOPTER WAS IMPLANTED IN THE PATIENT'S LEFT EYE (OS). ON (B)(6) 2022, THE LENS WAS REMOVED AND REPLACED DUE TO REFRACTIVE SURPRISE. Manufacturer Narrative: DEVICE EVALUATED BY MFR: WORK ORDER SEARCH FOUND NO SIMILAR COMPLAINTS. CLAIM# (B)(4). Manufacturer Narrative: B5: LENS WAS IMPLANTED ON (B)(6)…	Lens Exchange	Resolved
https://www.accessdata.fda.gov/scripts/cdrh/cfdocs/cfMAUDE/Detail.CFM?MDRFOI__ID=14417748&pc=MTA	2023826-2022-01591	2022-04-06	Injury	STAAR SURGICAL COMPANY	2022-05-17	MTA	IMPLANTABLE COLLAMER LENS (ICL)	Misfocusing	Blurred Vision	P030016	NA	1	Event Description: THE REPORTER INDICATED THAT THE SURGEON IMPLANTED A 12.6MM VICM6; -6.00 DIOPTER IMPLANTABLE COLLAMER LENS INTO THE PATIENT'S RIGHT EYE (OD) ON (B)(6) 2022. THE PATIENT HAS PERMANENT LOSS OF BCVA AND IT WAS NOTED "PATIENT HAS COMPLAINTS OF POOR FAR AND NEAR VISION". LENS REMAINS IMPLANTED. Manufacturer Narrative: ADDITIONAL INFORMATION: B5 - THE REPORTER INDICATED THAT THE SURGE…	Lens Exchange	Resolved
https://www.accessdata.fda.gov/scripts/cdrh/cfdocs/cfMAUDE/Detail.CFM?MDRFOI__ID=14455997&pc=MTA	2023826-2022-01621	2022-04-11	Malfunction	STAAR SURGICAL COMPANY	2022-05-20	MTA	IMPLANTABLE COLLAMER LENS (ICL)	Misfocusing	Blurred Vision	NA	NA	1	Event Description: THE REPORTER INDICATED THAT A PATIENT HAS COMPLAINTS IN LEFT EYE (OS) OF POOR FAR AND NEAR VISION POST VIVA IMPLANTABLE COLLAMER LENS IMPLANTATION. LENS REMAINS IMPLANTED. ADDITIONAL INFORMATION HAS BEEN REQUESTED BUT NONE HAS BEEN FORTHCOMING. IF ADDITIONAL INFORMATION IS RECEIVED A SUPPLEMENTAL MEDWATCH REPORT WILL BE SUBMITTED. Manufacturer Narrative: B5-THE REPORTER INDICAT…	Lens Retention	Unknown
https://www.accessdata.fda.gov/scripts/cdrh/cfdocs/cfMAUDE/Detail.CFM?MDRFOI__ID=15153652&pc=MTA	2023826-2022-02582	2022-05-10	Injury	STAAR SURGICAL COMPANY	2022-08-02	MTA	IMPLANTABLE COLLAMER LENS (ICL)	Misfocusing	Blurred Vision	P030016	NA	1	Event Description: THE REPORTER INDICATED THAT A 12.1MM VICM5_12.1 IMPLANTABLE COLLAMER LENS OF -12.0 DIOPTER WAS IMPLANTED INTO THE PATIENT'S LEFT EYE (OS) ON (B)(6) 2022. ON (B)(6) 2022 THE LENS WAS EXCHANGED FOR A DIFFERENT POWER LENS DUE TO REFRACTIVE SURPRISE. THE EXCHANGE RESOLVED THE PROBLEM. CAUSE IS REPORTED AS UNKNOWN. Manufacturer Narrative: (B)(4). CLAIM# (B)(4). Manufacturer Narrativ…	Lens Exchange	Resolved
https://www.accessdata.fda.gov/scripts/cdrh/cfdocs/cfMAUDE/Detail.CFM?MDRFOI__ID=15061062&pc=MTA	2023826-2022-02329	2022-05-12	Injury	STAAR SURGICAL COMPANY	2022-07-19	MTA	IMPLANTABLE COLLAMER LENS (ICL)	Misfocusing	Blurred Vision	P030016	NA	1	Event Description: THE REPORTER INDICATED THAT THE SURGEON IMPLANTED A 13.2MM VICM5_13.2; -5.00 DIOPTER IMPLANTABLE COLLAMER LENS INTO THE PATIENT'S RIGHT EYE (OD) ON (B)(6) 2022. THE PATIENT EXPERIENCED REFRACTIVE SURPRISE. ON (B)(6) 2022 THE LENS WAS EXCHANGE WITH A SAME LENGTH/MODEL LENS BUT DIFFERENT POWER AND THE PROBLEM WAS RESOLVED. THE CAUSE OF THE EVENT WAS REPORTED AS USER ERROR AND IT …	Lens Exchange	Resolved
https://www.accessdata.fda.gov/scripts/cdrh/cfdocs/cfMAUDE/Detail.CFM?MDRFOI__ID=16423702&pc=MTA	2023826-2023-00619	2022-05-18	Injury	STAAR SURGICAL COMPANY	2023-02-22	MTA	IMPLANTABLE COLLAMER LENS (ICL)	Misfocusing	Blurred Vision	P030016	NA	1	Event Description: THE REPORTER INDICATED THAT A 12.6MM VICM5 12.6 IMPLANTABLE COLLAMER LENS OF -3.50 DIOPTER WAS IMPLANTED INTO THE PATIENT'S RIGHT EYE (OD) ON (B)(6) 2022. REFRACTIVE SURPRISE WAS OBSERVED. ON (B)(6) 2022 THE LENS WAS EXCHANGED FOR A TORIC MODEL AND SAME SIZE LENS. THE REPLACEMENT LENS RESOLVED THE PROBLEM. CAUSE REPORTED AS UNKNOWN. Manufacturer Narrative: H3: DEVICE EVALUATION…	Lens Exchange	Resolved
https://www.accessdata.fda.gov/scripts/cdrh/cfdocs/cfMAUDE/Detail.CFM?MDRFOI__ID=14862210&pc=MTA	2023826-2022-01907	2022-05-31	Injury	STAAR SURGICAL COMPANY	2022-06-29	MTA	IMPLANTABLE COLLAMER LENS (ICL)	Misfocusing	Blurred Vision	P030016	NA	1	Event Description: THE REPORTER INDICATED THAT A 13.2MM VICM5_13.2 IMPLANTABLE COLLAMER LENS OF -7.5 DIOPTER WAS IMPLANTED INTO THE PATIENT'S LEFT EYE (OS) ON (B)(6) 2021. REFRACTIVE SURPRISE REPORTED. REPORTEDLY RESIDUAL ASTIGMATISM WAS CORRECTED BY INCISION. THE LENS REMAINS IMPLANTED. Manufacturer Narrative: PT INFO: UNK. LENS WORK ORDER SEARCH-NO SIMILAR COMPLAINTS REPORTED FOR UNITS WITHIN T…	Lens Retention	Unknown
https://www.accessdata.fda.gov/scripts/cdrh/cfdocs/cfMAUDE/Detail.CFM?MDRFOI__ID=15697668&pc=MTA	2023826-2022-03892	2022-06-10	Injury	STAAR SURGICAL COMPANY	2022-10-30	MTA	IMPLANTABLE COLLAMER LENS (ICL)	Misfocusing	Blurred Vision	P030016	NA	1	Event Description: THE REPORTER INDICATED THAT A 12.1MM VICM512.1 IMPLANTABLE COLLAMER LENS OF -6.0 DIOPTER WAS IMPLANTED INTO THE PATIENT'S LEFT EYE (OS) ON (B)(6) 2022. ON (B)(6) 2022, THE LENS WAS REMOVED DUE TO PRODUCT NON-CONFORMITY. REPORTEDLY, "FELLOW EYE LENS VAULTING WAS EXPLANTED DUE TO EXCESSIVE INFLAMMATION AND CELLS POST OP, PATIENT IS TRAUMATISED WITH THE WHOLE EXPERIENCE, PATIENT C…	Lens Extraction	Resolved
https://www.accessdata.fda.gov/scripts/cdrh/cfdocs/cfMAUDE/Detail.CFM?MDRFOI__ID=15298835&pc=MTA	2023826-2022-02920	2022-06-11	Injury	STAAR SURGICAL COMPANY	2022-08-25	MTA	IMPLANTABLE COLLAMER LENS (ICL)	Misfocusing	Blurred Vision	P030016	NA	1	Event Description: THE REPORTER INDICATED THAT THE SURGEON IMPLANTED A 12.6MM VICMO12.6; -10.0 DIOPTER IMPLANTABLE COLLAMER LENS INTO THE PATIENT'S RIGHT EYE (OD) ON (B)(6) 2022. THE PATIENT EXPERIENCED REFRACTIVE CHANGE OVER TIME. ON (B)(6) 2022 THE LENS WAS EXCHANGED WITH A SAME LENGTH BUT DIFFERENT POWER LENS AND THIS RESOLVED THE PROBLEM. THE CAUSE OF THE EVENT WAS REPORTED AS UNKNOWN. Manufa…	Lens Exchange	Resolved
https://www.accessdata.fda.gov/scripts/cdrh/cfdocs/cfMAUDE/Detail.CFM?MDRFOI__ID=17228874&pc=MTA	2023826-2023-02567	2022-06-17	Injury	STAAR SURGICAL COMPANY	2023-06-29	MTA	IMPLANTABLE COLLAMER LENS (ICL)	Misfocusing	Blurred Vision	P030016	NA	1	Event Description: THE REPORTER INDICATED THAT A 12.6MM VICM5_12.6 IMPLANTABLE COLLAMER LENS OF -4.50 DIOPTER WAS IMPLANTED INTO THE PATIENT'S RIGHT EYE (OD) ON (B)(6) 2022. REFRACTIVE TREATMENT WAS PERFORMED ON (B)(6) 2022 DUE TO REFRACTIVE SURPRISE AND THE PROBLEM RESOLVED. IN THE REPORTERS OPINION THE CAUSE OF THE EVENT WAS UNKNOWN. Manufacturer Narrative: H6 - TYPE OF INVESTIGATION - LENS WOR…	Lens Retention + Secondary Operation	Resolved
https://www.accessdata.fda.gov/scripts/cdrh/cfdocs/cfMAUDE/Detail.CFM?MDRFOI__ID=15276405&pc=MTA	2023826-2022-02828	2022-06-24	Injury	STAAR SURGICAL COMPANY	2022-08-23	MTA	IMPLANTABLE COLLAMER LENS (ICL)	Misfocusing	Blurred Vision	P030016	NA	1	Event Description: THE REPORTER INDICATED THAT A 12.6MM VICMO12.6 IMPLANTABLE COLLAMER LENS OF -6.0 DIOPTER WAS IMPLANTED IN THE PATIENT'S RIGHT EYE (OD) ON (B)(6) 2022. ON (B)(6) 2022, THE LENS WAS EXCHANGED FOR A SAME MODEL, SAME SIZE LENS DUE TO REFRACTIVE SURPRISE. THE PROBLEM WAS RESOLVED. CAUSE OF THE EVENT IS OTHER. Manufacturer Narrative: B5: CAUSE OF THE EVENT IS UNKNOWN. CLAIM# (B)(4). …	Lens Exchange	Resolved
https://www.accessdata.fda.gov/scripts/cdrh/cfdocs/cfMAUDE/Detail.CFM?MDRFOI__ID=17822417&pc=MTA	2023826-2023-04280	2022-06-28	Injury	STAAR SURGICAL COMPANY	2023-09-26	MTA	IMPLANTABLE COLLAMER LENS (ICL)	Misfocusing	Blurred Vision	P030016	NA	1	Event Description: THE REPORTER INDICATED THAT A 13.2MM VICM5_13.2 IMPLANTABLE COLLAMER LENS OF -2.50 DIOPTER WAS IMPLANTED INTO THE PATIENT'S LEFT EYE (OS) ON (B)(6) 2023. ON (B)(6) 2023 THE LENS WAS EXCHANGED FOR A DIFFERENT MODEL (TORIC LENS) AND POWER LENS. THIS EXCHANGE RESOLVED THE PROBLEM. PER REPORTER THE DEVICE DID NOT FAIL TO PERFORM AS INTENDED "PATIENT DIDN'T REACH EXPECTED VA" WAS RE…	Lens Exchange	Resolved
https://www.accessdata.fda.gov/scripts/cdrh/cfdocs/cfMAUDE/Detail.CFM?MDRFOI__ID=15921202&pc=MTA	2023826-2022-04343	2022-07-06	Injury	STAAR SURGICAL COMPANY	2022-12-05	MTA	IMPLANTABLE COLLAMER LENS (ICL)	Misfocusing	Blurred Vision	P030016	NA	1	Event Description: THE REPORTER INDICATED THE SURGEON IMPLANTED A 12.6MM VICM5_12.6 IMPLANTABLE COLLAMER LENS, -04.00 DIOPTER, INTO THE PATIENTS RIGHT EYE (OD) ON (B)(6) 2022. THE LENS WAS REMOVED ON (B)(6) 2022 DUE TO THE PATIENT EXPERIENCED A REFRACTIVE SURPRISE AND BLURRED VISION. THE LENS WAS REPLACED WITH A SHORTER LENS AND THE PROBLEM WAS RESOLVED. THE CAUSE OF THE EVENT WAS UNKNOWN. Manufa…	Lens Exchange	Resolved
https://www.accessdata.fda.gov/scripts/cdrh/cfdocs/cfMAUDE/Detail.CFM?MDRFOI__ID=18101043&pc=MTA	2023826-2023-05054	2022-07-07	Malfunction	STAAR SURGICAL COMPANY	2023-11-09	MTA	IMPLANTABLE COLLAMER LENS (ICL)	Misfocusing	Blurred Vision	P030016	NA	1	Event Description: THE REPORTER INDICATED THAT A 12.6MM VICM5_12.6 IMPLANTABLE COLLAMER LENS OF -8.50 DIOPTER WAS IMPLANTED INTO THE PATIENT'S RIGHT EYE (OD) ON (B)(6) 2022. THE PATIENT EXPERIENCED REFRACTIVE SURPRISE, SLIGHTLY MORE HYPEROPIC THAN PLANNED, UDVA IS 1.0. PATIENT IS DISSATISFIED WITH NEAR VISION AND COMPUTER DISTANCE, LENS REMAINS IMPLANTED. IF ADDITIONAL INFORMATION IS RECEIVED A S…	Lens Retention	Unknown
https://www.accessdata.fda.gov/scripts/cdrh/cfdocs/cfMAUDE/Detail.CFM?MDRFOI__ID=15160364&pc=MTA	2023826-2022-02614	2022-07-17	Injury	STAAR SURGICAL COMPANY	2022-08-03	MTA	IMPLANTABLE COLLAMER LENS (ICL)	Misfocusing	Blurred Vision	P030016	NA	1	Event Description: THE REPORTER INDICATED THAT THE SURGEON IMPLANTED A 12.6MM VICMO12.6; -13.5 DIOPTER IMPLANTABLE COLLAMER LENS INTO THE PATIENT'S LEFT EYE (OS) ON (B)(6) 2022. THE PATIENT HAD EXPERIENCED REFRACTIVE SURPRISE. ON (B)(6) 2022 THE LENS WAS EXCHANGED WITH A SAME MODEL/LENGTH LENS BUT DIFFERENT POWER. IT WAS ADDITIONALLY NOTED AFTER INITIAL IMPLANTATION OF POSTOPERATIVE VISION; IT CO…	Lens Exchange	Resolved
https://www.accessdata.fda.gov/scripts/cdrh/cfdocs/cfMAUDE/Detail.CFM?MDRFOI__ID=15882900&pc=MTA	2023826-2022-04253	2022-07-17	Injury	STAAR SURGICAL COMPANY	2022-11-29	MTA	IMPLANTABLE COLLAMER LENS (ICL)	Misfocusing	Blurred Vision	P030016	NA	1	Event Description: THE REPORTER INDICATED THAT THE SURGEON IMPLANTED A 12.6MM VICMO12.6; -14.5 DIOPTER IMPLANTABLE COLLAMER LENS INTO THE PATIENT'S LEFT EYE (OS) ON (B)(6) 2022. THE PATIENT EXPERIENCED REFRACTIVE SURPRISE. ON (B)(6) 2022 THE LENS WAS EXCHANGED WITH A SAME LENGTH BUT DIFFERENT MODEL/POWER LENS AND THIS RESOLVED THE PROBLEM. Manufacturer Narrative: H3: DEVICE EVALUATION - LENS WAS …	Lens Exchange	Resolved
https://www.accessdata.fda.gov/scripts/cdrh/cfdocs/cfMAUDE/Detail.CFM?MDRFOI__ID=15712752&pc=MTA	2023826-2022-03897	2022-07-24	Injury	STAAR SURGICAL COMPANY	2022-11-01	MTA	IMPLANTABLE COLLAMER LENS (ICL)	Misfocusing	Blurred Vision	P030016	NA	1	Event Description: THE REPORTER INDICATED THAT A 12.6MM VICMO12.6 IMPLANTABLE COLLAMER LENS OF A -7.5 DIOPTER WAS IMPLANTED IN THE PATIENT'S RIGHT EYE (OD) ON (B)(6) 2022. ON (B)(6) 2022, THE LENS WAS EXCHANGED FOR A TORIC LENS DUE TO REFRACTIVE SURPRISE. THE PROBLEM WAS RESOLVED. CAUSE OF THE EVENT IS UNKNOWN. Manufacturer Narrative: (B)(4). CLAIM# (B)(4). Manufacturer Narrative: H3: DEVICE EVAL…	Lens Exchange	Resolved
https://www.accessdata.fda.gov/scripts/cdrh/cfdocs/cfMAUDE/Detail.CFM?MDRFOI__ID=15712753&pc=MTA	2023826-2022-03898	2022-07-24	Injury	STAAR SURGICAL COMPANY	2022-11-01	MTA	IMPLANTABLE COLLAMER LENS (ICL)	Misfocusing	Blurred Vision	P030016	NA	1	Event Description: THE REPORTER INDICATED THAT A 12.6MM VICMO12.6 IMPLANTABLE COLLAMER LENS OF A -8.0 DIOPTER WAS IMPLANTED IN THE PATIENT'S LEFT EYE (OS) ON (B)(6) 2022. ON (B)(6) 2022, THE LENS WAS EXCHANGED FOR A TORIC LENS DUE TO REFRACTIVE SURPRISE. THE PROBLEM WAS RESOLVED. CAUSE OF THE EVENT IS UNKNOWN. Manufacturer Narrative: NO SIMILAR COMPLAINTS WITHIN ASSOCIATED LOTS WERE FOUND. (B)(4)…	Lens Exchange	Resolved
https://www.accessdata.fda.gov/scripts/cdrh/cfdocs/cfMAUDE/Detail.CFM?MDRFOI__ID=16728673&pc=MTA	2023826-2023-01334	2022-08-07	Injury	STAAR SURGICAL COMPANY	2023-04-12	MTA	IMPLANTABLE COLLAMER LENS (ICL)	Misfocusing	Blurred Vision	P030016	NA	1	Event Description: THE REPORTER INDICATED THAT A 13.2MM VICMO13.2 IMPLANTABLE COLLAMER LENS OF -7.0 DIOPTER WAS IMPLANTED IN THE PATIENT'S LEFT EYE (OS) ON (B)(6) 2022. ON (B)(6) 2022, THE LENS WAS EXCHANGED FOR DUE TO REFRACTIVE CHANGE OVERTIME. THE PROBLEM WAS RESOLVED. CAUSE OF THE EVENT IS UNKNOWN. Manufacturer Narrative: H6: WORK ORDER SEARCH: NO SIMILAR COMPLAINTS WITHIN ASSOCIATED LOTS WER…	Lens Exchange	Resolved
https://www.accessdata.fda.gov/scripts/cdrh/cfdocs/cfMAUDE/Detail.CFM?MDRFOI__ID=15712749&pc=MTA	2023826-2022-03896	2022-08-22	Injury	STAAR SURGICAL COMPANY	2022-11-01	MTA	IMPLANTABLE COLLAMER LENS (ICL)	Misfocusing	Blurred Vision	P030016	NA	1	Event Description: THE REPORTER INDICATED THAT A 12.1MM VICMO12.1 IMPLANTABLE COLLAMER LENS OF -5.5 DIOPTER WAS IMPLANTED INTO THE PATIENT'S LEFT EYE (OS) ON (B)(6) 2022. ON (B)(6) 2022, THE LENS WAS REMOVED DUE TO TRANSIENT LOSS OF BCVA. IN A SUBSEQUENT SURGERY LATER THAT DAY, A REPLACEMENT LENS WAS IMPLANTED AND THE PROBLEM WAS RESOLVED. CAUSE REPORTED AS UNKNOWN. Manufacturer Narrative: D4: CO…	Lens Exchange	Resolved
https://www.accessdata.fda.gov/scripts/cdrh/cfdocs/cfMAUDE/Detail.CFM?MDRFOI__ID=15849481&pc=MTA	2023826-2022-04262	2022-09-01	Injury	STAAR SURGICAL COMPANY	2022-11-22	MTA	IMPLANTABLE COLLAMER LENS (ICL)	Misfocusing	Blurred Vision	P030016	NA	1	Event Description: THE REPORTER INDICATED THAT A 13.2MM VICM5 13.2 IMPLANTABLE COLLAMER LENS OF -14.0 DIOPTER WAS IMPLANTED INTO THE PATIENTS RIGHT EYE (OD) ON (B)(6) 2022. REFRACTIVE SURPRISE WAS OBSERVED. THE LENS REMAINS IMPLANTED. NO FURTHER INFORMATION HAS BEEN PROVIDED. ATTEMPTS TO OBTAIN ADDITIONAL INFORMATION HAVE NOT BEEN SUCCESSFUL. IF ADDITIONAL INFORMATION IS RECEIVED A SUPPLEMENTAL M…	Lens Exchange	Resolved
https://www.accessdata.fda.gov/scripts/cdrh/cfdocs/cfMAUDE/Detail.CFM?MDRFOI__ID=15937239&pc=MTA	2023826-2022-04285	2022-09-07	Injury	STAAR SURGICAL COMPANY	2022-12-07	MTA	IMPLANTABLE COLLAMER LENS (ICL)	Misfocusing	Blurred Vision	P030016	NA	1	Event Description: THE REPORTER INDICATED THAT A 12.6MM VICM5 12.6 OF -8.50 DIOPTER WAS IMPLANTED INTO THE PATIENT'S RIGHT EYE (OD) ON (B)(6) 2022. LENS TEAR/BREAK DURING INJECTION/DELIVERY INTO THE EYE WAS REPORTED AND REFRACTIVE SURPRISE. ON (B)(6) 2022 THE LENS WAS EXCHANGED FOR A SAME MODEL AND SIZE LENS BUT A DIFFERENT DIOPTER. THE REPLACEMENT LENS RESOLVED THE PROBLEM. Manufacturer Narrativ…	Lens Exchange	Resolved
https://www.accessdata.fda.gov/scripts/cdrh/cfdocs/cfMAUDE/Detail.CFM?MDRFOI__ID=15577434&pc=MTA	2023826-2022-03585	2022-09-12	Injury	STAAR SURGICAL COMPANY	2022-10-11	MTA	IMPLANTABLE COLLAMER LENS (ICL)	Misfocusing	Blurred Vision	P030016	NA	1	Event Description: THE REPORTER INDICATED THAT THE SURGEON IMPLANTED A 13.2MM VICMO13.2; -7.5 DIOPTER IMPLANTABLE COLLAMER LENS INTO THE PATIENT'S LEFT EYE (OS) ON (B)(6) 2022. THE SURGEON REPORTS REFRACTIVE SURPRISE DURING THE POSTOPERATIVE EXAMINATION WITH THE PATIENT. ON (B)(6) 2022 THE SURGEON EXCHANGED THE LENS WITH A SAME LENGTH/MODEL/POWER LENS AND THIS RESOLVED THE PROBLEM. THE SURGEON SU…	Lens Exchange	Resolved
https://www.accessdata.fda.gov/scripts/cdrh/cfdocs/cfMAUDE/Detail.CFM?MDRFOI__ID=16301418&pc=MTA	2023826-2023-00379	2022-09-13	Injury	STAAR SURGICAL COMPANY	2023-02-04	MTA	IMPLANTABLE COLLAMER LENS (ICL)	Misfocusing	Blurred Vision	P030016	NA	1	Event Description: THE REPORTER INDICATED THAT A 12.6MM VICMO12.6 IMPLANTABLE COLLAMER LENS OF -12.5 DIOPTER WAS IMPLANTED IN THE PATIENT'S LEFT EYE (OS) ON (B)(6) 2022. ON (B)(6) 2022, THE LENS WAS EXCHANGED FOR A TORIC MODEL, SAME SIZE LENS DUE TO REFRACTIVE SURPRISE. THE PROBLEM WAS RESOLVED. CAUSE OF THE EVENT IS UNKNOWN. Manufacturer Narrative: ADDITIONAL INFORMATION: D9: LENS RETURNED 20-FE…	Lens Exchange	Resolved
https://www.accessdata.fda.gov/scripts/cdrh/cfdocs/cfMAUDE/Detail.CFM?MDRFOI__ID=16154822&pc=MTA	2023826-2023-00129	2022-09-15	Injury	STAAR SURGICAL COMPANY	2023-01-12	MTA	IMPLANTABLE COLLAMER LENS (ICL)	Misfocusing	Blurred Vision	P030016	NA	1	Event Description: THE REPORTER INDICATED THAT A 12.1MM VICM5 12.1 IMPLANTABLE COLLAMER LENS OF -10.00 DIOPTER WAS IMPLANTED INTO THE PATIENT'S LEFT EYE (OS) ON (B)(6) 2021. REFRACTIVE SURPRISE WAS OBSERVED. ON (B)(6) 2022, THE LENS WAS EXCHANGED FOR A SAME MODE AND SIZE BUT DIFFERENT DIOPTER LENS. THE REPLACEMENT LENS RESOLVED THE PROBLEM. CAUSE REPORTED AS USER ERROR. DEVICE DID NOT FAIL TO PER…	Lens Exchange	Resolved
https://www.accessdata.fda.gov/scripts/cdrh/cfdocs/cfMAUDE/Detail.CFM?MDRFOI__ID=16154821&pc=MTA	2023826-2023-00131	2022-09-29	Injury	STAAR SURGICAL COMPANY	2023-01-12	MTA	IMPLANTABLE COLLAMER LENS (ICL)	Misfocusing	Blurred Vision	P030016	NA	1	Event Description: THE REPORTER INDICATED THAT A 12.1MM VICM5 12.1 IMPLANTABLE COLLAMER LENS OF -7.00 DIOPTER WAS IMPLANTED INTO THE PATIENT'S LEFT EYE (OS) ON (B)(6) 2022 . REFRACTIVE SURPRISE WAS OBSERVED. ON (B)(6) 2022, THE LENS WAS EXCHANGED FOR A SAME MODEL AND SIZE BUT DIFFERENT DIOPTER LENS. THE REPLACEMENT LENS RESOLVED THE PROBLEM. CAUSE REPORTED AS USER ERROR. DEVICE DID NOT FAIL TO PE…	Lens Exchange	Resolved
https://www.accessdata.fda.gov/scripts/cdrh/cfdocs/cfMAUDE/Detail.CFM?MDRFOI__ID=16414710&pc=MTA	2023826-2023-00520	2022-10-08	Injury	STAAR SURGICAL COMPANY	2023-02-21	MTA	IMPLANTABLE COLLAMER LENS (ICL)	Misfocusing	Blurred Vision	P030016	NA	1	Event Description: THE REPORTER INDICATED THAT A 12.1MM VICM512.1 IMPLANTABLE COLLAMER LENS OF A -6.5 DIOPTER WAS IMPLANTED INTO THE PATIENT'S LEFT EYE (OS) ON (B)(6) 2022. ON (B)(6) 2023, THE LENS WAS REPLACED FOR A TORIC LENS DUE TO REFRACTIVE SURPRISE. THE PROBLEM WAS RESOLVED. THE CAUSE OF THE EVENT IS UNKNOWN. REPORTEDLY, "POSTOPERATIVELY, THE PATIENT HAS DIFFICULTY OPENING HER EYES EVEN AFT…	Lens Exchange	Resolved
https://www.accessdata.fda.gov/scripts/cdrh/cfdocs/cfMAUDE/Detail.CFM?MDRFOI__ID=16828266&pc=MTA	2023826-2023-01532	2022-10-08	Injury	STAAR SURGICAL COMPANY	2023-04-27	MTA	IMPLANTABLE COLLAMER LENS (ICL)	Misfocusing	Blurred Vision	P030016	NA	1	Event Description: THE REPORTER INDICATED THAT A 13.2MM VICMO13.2 IMPLANTABLE COLLAMER LENS OF -7.0 DIOPTER WAS IMPLANTED INTO THE PATIENT'S LEFT EYE (OS) ON (B)(6) 2022. THE LENS WAS LATER EXCHANGED FOR A TORIC LENS OF THE SAME LENGTH AND THE PROBLEM RESOLVED. CAUSE OF EVENT WAS UNKNOWN. Manufacturer Narrative: H6 - TYPE OF INVESTIGATION - LENS WORK ORDER SEARCH: NO SIMILAR COMPLAINT TYPE EVENTS…	Lens Exchange	Resolved
https://www.accessdata.fda.gov/scripts/cdrh/cfdocs/cfMAUDE/Detail.CFM?MDRFOI__ID=17338886&pc=MTA	2023826-2023-02982	2022-10-12	Injury	STAAR SURGICAL COMPANY	2023-07-17	MTA	IMPLANTABLE COLLAMER LENS (ICL)	Misfocusing	Blurred Vision	P030016	NA	1	Event Description: THE REPORTER INDICATED THAT THE SURGEON IMPLANTED A 12.1MM VICM5_12.1; -09.00 DIOPTER IMPLANTABLE COLLAMER LENS INTO THE PATIENT'S RIGHT EYE (OD) ON (B)(6) 2022. IT WAS REPORTED THE PATIENT HAD VISUAL ACUITY DISSATISFACTION. ON (B)(6) 2023 THE LENS WAS EXCHANGED WITH A SAME LENGTH BUT DIFFERENT MODEL/POWER LENS AND THIS RESOLVED THE PROBLEM. Manufacturer Narrative: H6 - TYPE OF…	Lens Exchange	Resolved
https://www.accessdata.fda.gov/scripts/cdrh/cfdocs/cfMAUDE/Detail.CFM?MDRFOI__ID=16344588&pc=MTA	2023826-2023-00474	2022-11-09	Injury	STAAR SURGICAL COMPANY	2023-02-09	MTA	IMPLANTABLE COLLAMER LENS (ICL)	Misfocusing	Blurred Vision	P030016	NA	1	Event Description: THE REPORTER INDICATED THAT A 12.6MM VICM512.6 IMPLANTABLE COLLAMER LENS OF A -9.0 DIOPTER WAS IMPLANTED INTO THE PATIENT'S LEFT EYE (OS) ON (B)(6) 2022. ON (B)(6) 2022, THE LENS WAS EXCHANGED FOR A REPLACEMENT LENS DUE TO REFRACTIVE SURPRISE. THE PROBLEM WAS RESOLVED. THE CAUSE OF THE EVENT IS UNKNOWN. Manufacturer Narrative: DEVICE EVALUATION: H3 - TYPE OF INVESTIGATION CODE:…	Lens Exchange	Resolved
https://www.accessdata.fda.gov/scripts/cdrh/cfdocs/cfMAUDE/Detail.CFM?MDRFOI__ID=16356403&pc=MTA	2023826-2023-00475	2022-11-09	Injury	STAAR SURGICAL COMPANY	2023-02-10	MTA	IMPLANTABLE COLLAMER LENS (ICL)	Misfocusing	Blurred Vision	P030016	NA	1	Event Description: THE REPORTER INDICATED THAT A 12.6MM VICM512.6 IMPLANTABLE COLLAMER LENS OF A -8.5 DIOPTER WAS IMPLANTED INTO THE PATIENT'S RIGHT EYE (OD) ON (B)(6) 2022. ON (B)(6) 2022, THE LENS WAS EXCHANGED FOR A REPLACEMENT LENS DUE TO REFRACTIVE SURPRISE. THE PROBLEM WAS RESOLVED. THE CAUSE OF THE EVENT IS UNKNOWN. Manufacturer Narrative: DEVICE EVALUATION: H3 - TYPE OF INVESTIGATION CODE…	Lens Exchange	Resolved
https://www.accessdata.fda.gov/scripts/cdrh/cfdocs/cfMAUDE/Detail.CFM?MDRFOI__ID=16464988&pc=MTA	2023826-2023-00719	2022-12-02	Injury	STAAR SURGICAL COMPANY	2023-03-01	MTA	IMPLANTABLE COLLAMER LENS (ICL)	Misfocusing	Blurred Vision	P030016	NA	1	Event Description: THE REPORTER INDICATED THAT A 12.6MM VICMO12.6 IMPLANTABLE COLLAMER LENS OF -3.5 DIOPTER WAS IMPLANTED IN THE PATIENT'S RIGHT EYE (OD) ON (B)(6) 2022. ON (B)(6) 2022, THE LENS WAS EXCHANGED FOR A SAME SIZE LENS DUE TO REFRACTIVE SURPRISE. THE PROBLEM WAS RESOLVED. CAUSE OF THE EVENT IS UNKNOWN. Manufacturer Narrative: H3 - DEVICE EVALUATION: THE LENS WAS RETURNED DRY WITH RESID…	Lens Exchange	Resolved
https://www.accessdata.fda.gov/scripts/cdrh/cfdocs/cfMAUDE/Detail.CFM?MDRFOI__ID=16150999&pc=MTA	2023826-2023-00139	2022-12-08	Injury	STAAR SURGICAL COMPANY	2023-01-12	MTA	IMPLANTABLE COLLAMER LENS (ICL)	Misfocusing	Blurred Vision	P030016	NA	1	Event Description: THE REPORTER INDICATED THAT THE SURGEON IMPLANTED A 12.6MM VICM5_12.6; -3.50 DIOPTER IMPLANTABLE COLLAMER LENS INTO THE PATIENT'S LEFT EYE (OS) ON (B)(6) 2022. THE PATIENT EXPERIENCED REFRACTIVE SURPRISE. ON (B)(6) 2022 THE LENS WAS EXCHANGED WITH A SAME LENGTH BUT DIFFERENT POWER LENS. THIS RESOLVED THE PROBLEM. THE CAUSE OF THE EVENT WAS REPORTED AS UNKNOWN. Manufacturer Narr…	Lens Exchange	Resolved
https://www.accessdata.fda.gov/scripts/cdrh/cfdocs/cfMAUDE/Detail.CFM?MDRFOI__ID=17119689&pc=MTA	2023826-2023-02165	2022-12-25	Malfunction	STAAR SURGICAL COMPANY	2023-06-13	MTA	IMPLANTABLE COLLAMER LENS (ICL)	Misfocusing	Blurred Vision	P030016	NA	1	Event Description: THE REPORTER INDICATED THAT THE SURGEON IMPLANTED A 12.6MM VICM6 12.6, -11.0 DIOPTER, IMPLANTABLE COLLAMER LENS INTO THE PATIENT'S RIGHT EYE (OD) ON 27/NOV/2023. REFRACTIVE SURPRISE WAS OBSERVED. LENS REMAINS IMPLANTED. THE CAUSE OF THE EVENT WAS REPORTED AS UNKNOWN. REPORTEDLY, LENS MAYBE EXCHANGED. Manufacturer Narrative: A4 - UNK A5 - UNK A6 - UNK H6 - WORK ORDER SEARCH: NO …	Lens Retention	Unknown
https://www.accessdata.fda.gov/scripts/cdrh/cfdocs/cfMAUDE/Detail.CFM?MDRFOI__ID=17119700&pc=MTA	2023826-2023-02166	2022-12-25	Malfunction	STAAR SURGICAL COMPANY	2023-06-13	MTA	IMPLANTABLE COLLAMER LENS (ICL)	Misfocusing	Blurred Vision	P030016	NA	1	Event Description: THE REPORTER INDICATED THAT THE SURGEON IMPLANTED A 12.6MM VICM6 12.6, -08.50 DIOPTER, IMPLANTABLE COLLAMER LENS INTO THE PATIENT'S LEFT EYE (OS) ON (B)(6) 2023. REFRACTIVE SURPRISE WAS OBSERVED. LENS REMAINS IMPLANTED. THE CAUSE OF THE EVENT WAS REPORTED AS UNKNOWN. REPORTEDLY, LENS MAYBE EXCHANGED. Manufacturer Narrative: H6 - WORK ORDER SEARCH: NO SIMILAR COMPLAINT TYPE EVEN…	Lens Retention	Unknown
https://www.accessdata.fda.gov/scripts/cdrh/cfdocs/cfMAUDE/Detail.CFM?MDRFOI__ID=16250313&pc=MTA	2023826-2023-00320	2023-01-04	Malfunction	STAAR SURGICAL COMPANY	2023-01-26	MTA	IMPLANTABLE COLLAMER LENS (ICL)	Misfocusing	Blurred Vision	P030016	NA	1	Event Description: THE REPORTER INDICATED THAT THE SURGEON IMPLANTED A 13.2MM VICM6_13.2; -9.50 DIOPTER IMPLANTABLE COLLAMER LENS INTO THE PATIENT'S LEFT EYE (OS) ON (B)(6) 2022. THE PATIENT EXPERIENCED REFRACTIVE SURPRISE. IT WAS ADDITIONALLY NOTED "PATIENT HAPPY WITH DISTANCE VISION BUT DISSATISFIED WITH INTERMEDIATE AND NEAR VISION". LENS REMAINS IMPLANTED. THE PROBLEM IS NOT RESOLVED. CAUSE O…	Lens Retention	Not_Resolved
https://www.accessdata.fda.gov/scripts/cdrh/cfdocs/cfMAUDE/Detail.CFM?MDRFOI__ID=16250339&pc=MTA	2023826-2023-00319	2023-01-04	Malfunction	STAAR SURGICAL COMPANY	2023-01-26	MTA	IMPLANTABLE COLLAMER LENS (ICL)	Misfocusing	Blurred Vision	P030016	NA	1	Event Description: THE REPORTER INDICATED THAT THE SURGEON IMPLANTED A 13.2MM VICM6_13.2; -10.00 DIOPTER IMPLANTABLE COLLAMER LENS INTO THE PATIENT'S RIGHT EYE (OD) ON (B)(6) 2022. THE PATIENT EXPERIENCED REFRACTIVE SURPRISE; IT WAS ADDITIONALLY NOTED "PATIENT HAPPY WITH DISTANCE VISION BUT DISSATISFIED WITH INTERMEDIATE AND NEAR VISION. LENS REMAINS IMPLANTED. THE PROBLEM IS NOT RESOLVED. THE CA…	Lens Retention	Not_Resolved
https://www.accessdata.fda.gov/scripts/cdrh/cfdocs/cfMAUDE/Detail.CFM?MDRFOI__ID=17121541&pc=MTA	2023826-2023-02331	2023-01-10	Injury	STAAR SURGICAL COMPANY	2023-06-13	MTA	IMPLANTABLE COLLAMER LENS (ICL)	Misfocusing	Blurred Vision	P030016	NA	1	Event Description: THE REPORTER INDICATED THAT THE SURGEON IMPLANTED A 12.6MM VICMO12.6; -13.5 DIOPTER IMPLANTABLE COLLAMER LENS INTO THE PATIENT'S LEFT EYE (OS) (B)(6) 2023. THE PATIENT EXPERIENCED BLURRED VISION WITH VISION QUALITY ISSUES. ON (B)(6) 2023 THE LENS WAS EXCHANGED WITH A SAME LENGTH BUT DIFFERENT MODEL/POWER LENS AND THIS RESOLVED THE PROBLEM. THE CAUSE OF THE EVENT WAS REPORTED AS…	Lens Exchange	Resolved
https://www.accessdata.fda.gov/scripts/cdrh/cfdocs/cfMAUDE/Detail.CFM?MDRFOI__ID=16281081&pc=MTA	2023826-2023-00403	2023-01-15	Injury	STAAR SURGICAL COMPANY	2023-02-01	MTA	IMPLANTABLE COLLAMER LENS (ICL)	Misfocusing	Blurred Vision	P030016	NA	1	Event Description: THE REPORTER INDICATED THAT THE SURGEON IMPLANTED A 13.2MM VICMO13.2; -5.5 DIOPTER IMPLANTABLE COLLAMER LENS INTO THE PATIENT'S LEFT EYE (OS) ON (B)(6) 2022. THE SURGEON REPORTS TRANSIENT LOSS OF BCVA. ON (B)(6) 2023 THE LENS WAS EXCHANGED WITH A SHORTER LENGTH LENS AND DIFFERENT MODEL LENS. THIS RESOLVED THE PROBLEM. THE CAUSE OF THE EVENT WAS REPORTED AS "OTHER" AND NOTED; "D…	Lens Exchange	Resolved
https://www.accessdata.fda.gov/scripts/cdrh/cfdocs/cfMAUDE/Detail.CFM?MDRFOI__ID=16281082&pc=MTA	2023826-2023-00395	2023-01-15	Injury	STAAR SURGICAL COMPANY	2023-02-01	MTA	IMPLANTABLE COLLAMER LENS (ICL)	Misfocusing	Blurred Vision	P030016	NA	1	Event Description: THE REPORTER INDICATED THAT THE SURGEON IMPLANTED A 13.2MM VICMO13.2; -6.0 DIOPTER IMPLANTABLE COLLAMER LENS INTO THE PATIENT'S RIGHT EYE (OD) ON (B)(6) 2022. THE SURGEON REPORTS TRANSIENT LOSS OF BCVA. ON (B)(6) 2023 THE LENS WAS EXCHANGED WITH A SHORTER LENGTH LENS AND DIFFERENT MODEL LENS. THIS RESOLVED THE PROBLEM. THE CAUSE OF THE EVENT WAS REPORTED AS "OTHER" AND NOTED; "…	Lens Exchange	Resolved
https://www.accessdata.fda.gov/scripts/cdrh/cfdocs/cfMAUDE/Detail.CFM?MDRFOI__ID=16678113&pc=MTA	2023826-2023-01214	2023-01-24	Injury	STAAR SURGICAL COMPANY	2023-04-04	MTA	IMPLANTABLE COLLAMER LENS (ICL)	Misfocusing	Blurred Vision	P030016	NA	1	Event Description: THE REPORTER INDICATED THAT THE SURGEON IMPLANTED A 12.6MM VICM5_12.6; -2.75 DIOPTER IMPLANTABLE COLLAMER LENS INTO THE PATIENT'S LEFT EYE (OS) ON (B)(6) 2023. THE PATIENT EXPERIENCED REFRACTIVE SURPRISE. LENS REMAINS IMPLANTED. THE CAUSE OF THE EVENT WAS REPORTED AS UNKNOWN. IF ADDITIONAL INFORMATION IS RECEIVED A SUPPLEMENTAL MEDWATCH REPORT WILL BE SUBMITTED. Manufacturer Na…	Lens Exchange	Resolved
https://www.accessdata.fda.gov/scripts/cdrh/cfdocs/cfMAUDE/Detail.CFM?MDRFOI__ID=16892521&pc=MTA	2023826-2023-01748	2023-02-07	Injury	STAAR SURGICAL COMPANY	2023-05-08	MTA	IMPLANTABLE COLLAMER LENS (ICL)	Misfocusing	Blurred Vision	P030016	NA	1	Event Description: THE REPORTER INDICATED THAT A 12.6MM VICMO12.6 IMPLANTABLE COLLAMER LENS OF -5.00 DIOPTER WAS IMPLANTED INTO THE PATIENT'S RIGHT EYE (OD) ON (B)(6) 2022. ON (B)(6) 2023 THE LENS WAS EXCHANGED FOR A TORIC LENS DUE TO REFRACTIVE SURPRISE. THE EXCHANGE RESOLVED THE PROBLEM. CAUSE OF EVENT WAS UNKNOWN. Manufacturer Narrative: H6 - TYPE OF INVESTIGATION - LENS WORK ORDER SEARCH: NO …	Lens Exchange	Resolved
https://www.accessdata.fda.gov/scripts/cdrh/cfdocs/cfMAUDE/Detail.CFM?MDRFOI__ID=17131352&pc=MTA	2023826-2023-02389	2023-02-09	Injury	STAAR SURGICAL COMPANY	2023-06-14	MTA	IMPLANTABLE COLLAMER LENS (ICL)	Misfocusing	Blurred Vision	P030016	NA	1	Event Description: THE REPORTER INDICATED THAT THE SURGEON IMPLANTED A 13.2MM VICM5_13.2; -7.50 DIOPTER IMPLANTABLE COLLAMER LENS INTO THE PATIENT'S RIGHT EYE (OD) ON (B)(6) 2023. THE PATIENT EXPERIENCED REFRACTIVE SURPRISE. THE SURGEON PERFORMED REFRACTIVE TREATMENT (LASIK/PRK/ETC). THIS RESOLVED THE PROBLEM. IT WAS ADDITIONALLY NOTED "ALL IS FINE AND PATIENT IS HAPPY, LASER TOUCH UP TREATMENT O…	Lens Retention + Secondary Operation	Resolved
https://www.accessdata.fda.gov/scripts/cdrh/cfdocs/cfMAUDE/Detail.CFM?MDRFOI__ID=17066600&pc=MTA	2023826-2023-02225	2023-02-10	Injury	STAAR SURGICAL COMPANY	2023-06-05	MTA	IMPLANTABLE COLLAMER LENS (ICL)	Misfocusing	Blurred Vision	P030016	NA	1	Event Description: THE REPORTER INDICATED THAT THE SURGEON IMPLANTED A 12.1MM VICM5_12.1; -8.50 DIOPTER IMPLANTABLE COLLAMER LENS INTO THE PATIENT'S RIGHT EYE (OD) ON (B)(6) 2023. THE PATIENT EXPERIENCED REFRACTIVE SURPRISE. ON (B)(6) 2023 THE LENS WAS EXPLANTED. ON THIS SAME DATE IN A SEPARATE SURGERY A REPLACEMENT LENS OF THE SAME LENGTH, BUT DIFFERENT MODEL/POWER WAS IMPLANTED AND THIS RESOLVE…	Lens Exchange	Resolved
https://www.accessdata.fda.gov/scripts/cdrh/cfdocs/cfMAUDE/Detail.CFM?MDRFOI__ID=16792960&pc=MTA	2023826-2023-01479	2023-02-11	Injury	STAAR SURGICAL COMPANY	2023-04-23	MTA	IMPLANTABLE COLLAMER LENS (ICL)	Misfocusing	Blurred Vision	P030016	NA	1	Event Description: THE REPORTER INDICATED THAT A 13.2MM VICMO13.2 IMPLANTABLE COLLAMER LENS OF -11.5 DIOPTER WAS IMPLANTED IN THE PATIENT'S RIGHT EYE (OD) ON (B)(6) 2023. ON (B)(6) 2023, THE LENS WAS EXCHANGED DUE TO REFRACTIVE SURPRISE. THE PROBLEM WAS RESOLVED. CAUSE OF THE EVENT IS UNKNOWN. REPORTEDLY, "BEFORE REPLACING THE FIRST LENS, THE DOCTOR PERFORMED LENS ALIGNMENT AND ROTATION IN THE EY…	Lens Exchange	Resolved
https://www.accessdata.fda.gov/scripts/cdrh/cfdocs/cfMAUDE/Detail.CFM?MDRFOI__ID=16678778&pc=MTA	2023826-2023-01178	2023-02-14	Injury	STAAR SURGICAL COMPANY	2023-04-04	MTA	IMPLANTABLE COLLAMER LENS (ICL)	Misfocusing	Blurred Vision	P030016	NA	1	Event Description: THE REPORTER INDICATED THAT A 12.6MM VICM512.6 IMPLANTABLE COLLAMER LENS OF A -5.50 DIOPTER WAS IMPLANTED INTO THE PATIENT'S RIGHT EYE (OD) ON (B)(6) 2023. ON (B)(6) 2023, THE LENS WAS REMOVED DUE TO REFRACTIVE SURPRISE. THE PROBLEM WAS RESOLVED. Manufacturer Narrative: ADDITIONAL INFORMATION: H6 - TYPE OF INVESTIGATION 3331 - DEVICE HISTORY RECORD (DHR) REVIEW: BASED ON THE RE…	Lens Extraction	Resolved
https://www.accessdata.fda.gov/scripts/cdrh/cfdocs/cfMAUDE/Detail.CFM?MDRFOI__ID=17696360&pc=MTA	2023826-2023-03777	2023-02-14	Injury	STAAR SURGICAL COMPANY	2023-09-07	MTA	IMPLANTABLE COLLAMER LENS (ICL)	Misfocusing	Blurred Vision	P030016	NA	1	Event Description: THE REPORTER INDICATED THAT A 13.2MM VICMO13.2 IMPLANTABLE COLLAMER LENS OF -5.0 DIOPTER WAS IMPLANTED INTO THE PATIENT'S LEFT EYE (OS) ON (B)(6) 2023. ON (B)(6) 2023 THE LENS WAS EXCHANGED FOR TORIC LENS OF DIFFERENT POWER DUE TO REFRACTIVE SURPRISE. THE EXCHANGE RESOLVED THE PROBLEM. CAUSE OF EVENT WAS UNKNOWN. Manufacturer Narrative: H3: DEVICE EVALUATION: LENS WAS RETURNED …	Lens Exchange	Resolved
https://www.accessdata.fda.gov/scripts/cdrh/cfdocs/cfMAUDE/Detail.CFM?MDRFOI__ID=17971404&pc=MTA	2023826-2023-04572	2023-02-17	Injury	STAAR SURGICAL COMPANY	2023-10-19	MTA	IMPLANTABLE COLLAMER LENS (ICL)	Misfocusing	Blurred Vision	P030016	NA	1	Event Description: THE REPORTER INDICATED THAT A 13.2MM VICM513.2 IMPLANTABLE COLLAMER LENS OF -11.0 DIOPTER WAS IMPLANTED IN THE PATIENT'S RIGHT EYE (OD) ON (B)(6) 2023. ON (B)(6) 2023, THE LENS WAS REMOVED DUE TO REFRACTIVE SUPRISE. ON (B)(6) 2023, A REPLACEMENT LENS WAS IMPLANTED AND THE PROBLEM WAS RESOLVED. CAUSE OF THE EVENT IS OTHER. Manufacturer Narrative: A4-A6:UNK. H6: WORK ORDER SEARCH…	Lens Exchange	Resolved
https://www.accessdata.fda.gov/scripts/cdrh/cfdocs/cfMAUDE/Detail.CFM?MDRFOI__ID=17992929&pc=MTA	2023826-2023-04742	2023-02-18	Injury	STAAR SURGICAL COMPANY	2023-10-23	MTA	IMPLANTABLE COLLAMER LENS (ICL)	Misfocusing	Blurred Vision	P030016	NA	1	Event Description: THE REPORTER INDICATED THAT A 12.6MM, VICM5_12.6, -5.0 DIOPTER, IMPLANTABLE COLLAMER LENS WAS IMPLANTED INTO THE PATIENTS RIGHT EYE (OD) ON (B)(6) 2023. ON (B)(6) 2023 THE LENS WAS EXCHANGED FOR A DIFFERENT DIOPTER LENS AND THE PROBLEM RESOLVED. CAUSE OF EVENT WAS UNKNOWN. Manufacturer Narrative: TYPE OF INVESTIGATION - LENS WORK ORDER SEARCH: NO SIMILAR COMPLAINT TYPE EVENTS R…	Lens Exchange	Resolved
https://www.accessdata.fda.gov/scripts/cdrh/cfdocs/cfMAUDE/Detail.CFM?MDRFOI__ID=16748688&pc=MTA	2023826-2023-01354	2023-03-01	Injury	STAAR SURGICAL COMPANY	2023-04-16	MTA	IMPLANTABLE COLLAMER LENS (ICL)	Misfocusing	Blurred Vision	P030016	NA	1	Event Description: THE REPORTER INDICATED THAT A 13.2MM VICMO13.2 IMPLANTABLE COLLAMER LENS OF -10.00 DIOPTER WAS IMPLANTED INTO THE PATIENT'S LEFT EYE (OS) ON (B)(6) 2022. ON (B)(6) 2023THE LENS WAS EXCHANGED FOR A TORIC LENS DUE TO REFRACTIVE SURPRISE. THE EXCHANGE RESOLVED THE PROBLEM. CAUSE OF EVENT WAS UNKNOWN. Manufacturer Narrative: H6- DEVICE EVALUATION: LENS WAS RETURNED DRY WITH RESIDUE…	Lens Exchange	Resolved
https://www.accessdata.fda.gov/scripts/cdrh/cfdocs/cfMAUDE/Detail.CFM?MDRFOI__ID=16746899&pc=MTA	2023826-2023-01350	2023-03-14	Injury	STAAR SURGICAL COMPANY	2023-04-14	MTA	IMPLANTABLE COLLAMER LENS (ICL)	Misfocusing	Blurred Vision	P030016	NA	1	Event Description: THE REPORTER INDICATED THAT A 13.2MM, VICM5_13.2, -6.50 DIOPTER, IMPLANTABLE COLLAMER LENS WAS IMPLANTED INTO THE PATIENTS LEFT EYE (OS) ON (B)(6) 2022. THE PATIENT EXPERIENCED REFRACTIVE SURPRISE. LENS REMAINS IMPLANTED. CAUSE OF EVENT WAS UNKNOWN. IF ADDITIONAL INFORMATION IS RECEIVED A SUPPLEMENTAL MEDWATCH REPORT WILL BE SUBMITTED. Manufacturer Narrative: B5- PER UPDATED IN…	Lens Exchange	Resolved
https://www.accessdata.fda.gov/scripts/cdrh/cfdocs/cfMAUDE/Detail.CFM?MDRFOI__ID=17761001&pc=MTA	2023826-2023-04001	2023-03-17	Injury	STAAR SURGICAL COMPANY	2023-09-15	MTA	IMPLANTABLE COLLAMER LENS (ICL)	Misfocusing	Blurred Vision	P030016	NA	1	Event Description: THE REPORTER INDICATED THAT A 12.1MM VICM512.1 IMPLANTABLE COLLAMER LENS OF A -10.0 DIOPTER WAS IMPLANTED INTO THE PATIENT'S RIGHT EYE (OD) ON (B)(6) 2023. ON (B)(6) 2023, THE LENS WAS EXCHANGED FOR A SAME SIZE LENS DUE TO REFRACTIVE SURPRISE. THE PROBLEM WAS RESOLVED. Manufacturer Narrative: H3: DEVICE EVALUATION: LENS WAS RETURNED IN A MICRO-CENTRIFUGE VIAL, DRY, WITH RESIDUE…	Lens Exchange	Resolved
https://www.accessdata.fda.gov/scripts/cdrh/cfdocs/cfMAUDE/Detail.CFM?MDRFOI__ID=16810401&pc=MTA	2023826-2023-01482	2023-03-20	Injury	STAAR SURGICAL COMPANY	2023-04-25	MTA	IMPLANTABLE COLLAMER LENS (ICL)	Misfocusing	Blurred Vision	P030016	NA	1	Event Description: THE REPORTER INDICATED THAT A 13.2MM VICM513.2 IMPLANTABLE COLLAMER LENS OF A -9.0 DIOPTER WAS IMPLANTED INTO THE PATIENT'S LEFT EYE (OS) ON (B)(6) 2023. ON (B)(6) 2023, THE LENS WAS EXCHANGED FOR A REPLACEMENT LENS DUE TO REFRACTIVE SURPRISE. THE PROBLEM WAS RESOLVED. THE CAUSE OF THE EVENT IS UNKNOWN. STATUS OF THE EYE IS REPORTED AS "GOOD". Manufacturer Narrative: H3: DEVICE…	Lens Exchange	Resolved
https://www.accessdata.fda.gov/scripts/cdrh/cfdocs/cfMAUDE/Detail.CFM?MDRFOI__ID=16810453&pc=MTA	2023826-2023-01481	2023-03-20	Injury	STAAR SURGICAL COMPANY	2023-04-25	MTA	IMPLANTABLE COLLAMER LENS (ICL)	Misfocusing	Blurred Vision	P030016	NA	1	Event Description: THE REPORTER INDICATED THAT A 13.2MM VICM513.2 IMPLANTABLE COLLAMER LENS OF A -6.5 DIOPTER WAS IMPLANTED INTO THE PATIENT'S RIGHT EYE (OD) ON (B)(6) 2023. ON (B)(6) 2023, THE LENS WAS EXCHANGED FOR A REPLACEMENT LENS DUE TO REFRACTIVE SURPRISE. THE PROBLEM WAS RESOLVED. THE CAUSE OF THE EVENT IS UNKNOWN. STATUS OF THE EYE IS REPORTED AS "GOOD." Manufacturer Narrative: H6: WORK …	Lens Exchange	Resolved
https://www.accessdata.fda.gov/scripts/cdrh/cfdocs/cfMAUDE/Detail.CFM?MDRFOI__ID=17592020&pc=MTA	2023826-2023-03620	2023-03-24	Injury	STAAR SURGICAL COMPANY	2023-08-21	MTA	IMPLANTABLE COLLAMER LENS (ICL)	Misfocusing	Blurred Vision	P030016	NA	1	Event Description: THE REPORTER INDICATED THAT A 13.2MM VICMO13.2 IMPLANTABLE COLLAMER LENS OF A -14.0 DIOPTER WAS IMPLANTED INTO THE PATIENT'S LEFT EYE (OS) ON (B)(6) 2022. ON (B)(6) 2023, THE LENS WAS EXCHANGED FOR A TORIC LENS DUE TO REFRACTIVE SURPRISE AND REFRACTIVE CHANGE OVER TIME. THE PROBLEM WAS RESOLVED. CAUSE OF THE EVENT IS UNKNOWN. Manufacturer Narrative: CORRECTED DATA: A2- " ON (B)…	Lens Exchange	Resolved
https://www.accessdata.fda.gov/scripts/cdrh/cfdocs/cfMAUDE/Detail.CFM?MDRFOI__ID=17954043&pc=MTA	2023826-2023-04567	2023-03-24	Injury	STAAR SURGICAL COMPANY	2023-10-17	MTA	IMPLANTABLE COLLAMER LENS (ICL)	Misfocusing	Blurred Vision	P030016	NA	1	Event Description: THE REPORTER INDICATED THAT A 13.2MM VICMO13.2 IMPLANTABLE COLLAMER LENS OF -15.5 DIOPTER WAS IMPLANTED INTO THE PATIENT'S RIGHT EYE (OD) ON (B)(6) 2022. ON (B)(6) 2023, THE LENS WAS EXCHANGED FOR A TORIC MODEL LENS DUE TO REFRACTIVE SUPRISE AND REFRACTIVE CHANGE OVERTIME. THE PROBLEM WAS RESOLVED. CAUSE OF THE EVENT IS UNKNOWN. Manufacturer Narrative: CORRECTED DATA: B5: THE R…	Lens Exchange	Resolved
https://www.accessdata.fda.gov/scripts/cdrh/cfdocs/cfMAUDE/Detail.CFM?MDRFOI__ID=17213970&pc=MTA	2023826-2023-02554	2023-03-30	Injury	STAAR SURGICAL COMPANY	2023-06-27	MTA	IMPLANTABLE COLLAMER LENS (ICL)	Misfocusing	Blurred Vision	P030016	NA	1	Event Description: THE REPORTER INDICATED THAT THE SURGEON IMPLANTED A 12.6MM VICM5_12.6 IMPLANTABLE COLLAMER LENS OF -6.00 DIOPTER INTO THE PATIENT'S RIGHT EYE (OD) ON (B)(6) 2023. ON (B)(6) 2023 THE LENS WAS EXCHANGED FOR A DIFFERENT POWER LENS DUE TO REFRACTIVE SURPRISE AND THE PROBLEM RESOLVED. CAUSE REPORTED AS UNKNOWN. Manufacturer Narrative: ADDITIONAL INFORMATION: D9: RETURN DATE: 14-JUL-…	Lens Exchange	Resolved
https://www.accessdata.fda.gov/scripts/cdrh/cfdocs/cfMAUDE/Detail.CFM?MDRFOI__ID=17214401&pc=MTA	2023826-2023-02555	2023-03-30	Injury	STAAR SURGICAL COMPANY	2023-06-28	MTA	IMPLANTABLE COLLAMER LENS (ICL)	Misfocusing	Blurred Vision	P030016	NA	1	Event Description: THE REPORTER INDICATED THAT THE SURGEON IMPLANTED A 12.6MM VICM5_12.6 IMPLANTABLE COLLAMER LENS OF -5.50 DIOPTER INTO THE PATIENT'S LEFT EYE (OS) ON (B)(6) 2023. ON (B)(6) 2023 THE LENS WAS EXCHANGED FOR A DIFFERENT POWER LENS DUE TO REFRACTIVE SURPRISE AND THE PROBLEM RESOLVED. CAUSE REPORTED AS UNKNOWN. Manufacturer Narrative: ADDITIONAL INFORMATION: D9: RETURN DATE: (B)(6) 2…	Lens Exchange	Resolved
https://www.accessdata.fda.gov/scripts/cdrh/cfdocs/cfMAUDE/Detail.CFM?MDRFOI__ID=16991214&pc=MTA	2023826-2023-01769	2023-04-03	Injury	STAAR SURGICAL COMPANY	2023-05-24	MTA	IMPLANTABLE COLLAMER LENS (ICL)	Misfocusing	Blurred Vision	P030016	NA	1	Event Description: THE REPORTER INDICATED THAT A 13.2MM, VICMO13.2, -11.50 DIOPTER, IMPLANTABLE COLLAMER LENS WAS IMPLANTED INTO THE PATIENT'S LEFT EYE (OS) ON (B)(6) 2022. ON (B)(6) 2023 THE LENS WAS EXCHANGED WITH A DIFFERENT POWER TORIC LENS DUE TO REFRACTIVE SURPRISE. THE PROBLEM WAS RESOLVED. CAUSE OF THE EVENT IS REPORTED AS UNKNOWN. Manufacturer Narrative: A4 - UNK. A5 - UNK. A6 - UNK. H6 …	Lens Exchange	Resolved
https://www.accessdata.fda.gov/scripts/cdrh/cfdocs/cfMAUDE/Detail.CFM?MDRFOI__ID=17410063&pc=MTA	2023826-2023-03193	2023-04-04	Injury	STAAR SURGICAL COMPANY	2023-07-27	MTA	IMPLANTABLE COLLAMER LENS (ICL)	Misfocusing	Blurred Vision	P030016	NA	1	Event Description: THE REPORTER INDICATED THAT THE SURGEON IMPLANTED A 12.6MM VICMO12.6; -9.0 DIOPTER IMPLANTABLE COLLAMER LENS INTO THE PATIENT'S LEFT EYE (OS) ON (B)(6) 2023. THE PATIENT EXPERIENCED REFRACTIVE SURPRISE. ON (B)(6) 2023 THE LENS WAS EXCHANGED WITH A SAME LENGTH LENS BUT DIFFERENT POWER AND THIS RESOLVED THE PROBLEM. THE CAUSE OF THE EVENT WAS REPORTED AS UNKNOWN. Manufacturer Nar…	Lens Exchange	Resolved
https://www.accessdata.fda.gov/scripts/cdrh/cfdocs/cfMAUDE/Detail.CFM?MDRFOI__ID=17434430&pc=MTA	2023826-2023-03192	2023-04-09	Injury	STAAR SURGICAL COMPANY	2023-08-01	MTA	IMPLANTABLE COLLAMER LENS (ICL)	Misfocusing	Blurred Vision	P030016	NA	1	Event Description: THE REPORTER INDICATED THAT A 12.6MM, VICMO 12.6, -4.0 DIOPTER, IMPLANTABLE COLLAMER LENS WAS IMPLANTED INTO THE PATIENT'S LEFT EYE (OS) ON (B)(6) 2022. ON (B)(6) 2023 THE LENS WAS REPLACED WITH A SAME SIZE , DIFFERENT POWER (SPHERE/CYLINDER/AXIS) LENS DUE TO REFRACTIVE SURPRISE. THE PROBLEM WAS RESOLVED. CAUSE OF THE EVENT IS REPORTED AS UNKNOWN. Manufacturer Narrative: DEVICE…	Lens Exchange	Resolved
https://www.accessdata.fda.gov/scripts/cdrh/cfdocs/cfMAUDE/Detail.CFM?MDRFOI__ID=17477568&pc=MTA	2023826-2023-03350	2023-04-10	Injury	STAAR SURGICAL COMPANY	2023-08-08	MTA	IMPLANTABLE COLLAMER LENS (ICL)	Misfocusing	Blurred Vision	P030016	NA	1	Event Description: THE REPORTER INDICATED THAT A 12.1MM VICM5_12.1 IMPLANTABLE COLLAMER LENS OF -10.50 DIOPTER WAS IMPLANTED INTO THE PATIENT'S RIGHT EYE (OD) ON (B)(6) 2023. PER REPORTER PATIENT WAS DISSATISFIED WITH VA. ON (B)(6) 2023 LENS WAS EXCHANGED FOR TORIC LENS AND THE PROBLEM RESOLVED. Manufacturer Narrative: H6 - TYPE OF INVESTIGATION - LENS WORK ORDER SEARCH: NO SIMILAR COMPLAINT TYPE…	Lens Exchange	Resolved
https://www.accessdata.fda.gov/scripts/cdrh/cfdocs/cfMAUDE/Detail.CFM?MDRFOI__ID=17840230&pc=MTA	2023826-2023-04285	2023-04-12	Injury	STAAR SURGICAL COMPANY	2023-09-28	MTA	IMPLANTABLE COLLAMER LENS (ICL)	Misfocusing	Blurred Vision	P030016	NA	1	Event Description: THE REPORTER INDICATED THAT A 12.6MM VICM5_12.6 IMPLANTABLE COLLAMER LENS OF -7.50 DIOPTER WAS IMPLANTED INTO THE PATIENT'S LEFT EYE (OS) ON (B)(6) 2023. ON (B)(6) 2023 THE LENS WAS EXCHANGED FOR A DIFFERENT POWER LENS DUE TO REFRACTIVE SURPRISE. THE EXCHANGE RESOLVED THE PROBLEM. CAUSE WAS REPORTED AS UNKNOWN. Manufacturer Narrative: H3 - DEVICE EVALUATION: THE LENS WAS RETURN…	Lens Exchange	Resolved
https://www.accessdata.fda.gov/scripts/cdrh/cfdocs/cfMAUDE/Detail.CFM?MDRFOI__ID=17330141&pc=MTA	2023826-2023-02928	2023-04-14	Injury	STAAR SURGICAL COMPANY	2023-07-14	MTA	IMPLANTABLE COLLAMER LENS (ICL)	Misfocusing	Blurred Vision	P030016	NA	1	Event Description: THE REPORTER INDICATED THAT THE SURGEON IMPLANTED A 13.7MM VICMO13.7; -6.5 DIOPTER IMPLANTABLE COLLAMER LENS INTO THE PATIENT'S RIGHT EYE (OD) ON (B)(6) 2023. THE PATIENT EXPERIENCED REFRACTIVE SURPRISE. ON (B)(6) 2023 THE LENS WAS EXCHANGED WITH THE SAME LENGTH BUT TORIC LENS/DIFFERENT POWER AND THIS RESOLVED THE PROBLEM. THE CAUSE OF THE EVENT WAS REPORTED AS UNKNOWN. Manufac…	Lens Exchange	Resolved
https://www.accessdata.fda.gov/scripts/cdrh/cfdocs/cfMAUDE/Detail.CFM?MDRFOI__ID=17148654&pc=MTA	2023826-2023-02406	2023-04-26	Injury	STAAR SURGICAL COMPANY	2023-06-16	MTA	IMPLANTABLE COLLAMER LENS (ICL)	Misfocusing	Blurred Vision	P030016	NA	1	Event Description: THE REPORTER INDICATED THAT THE SURGEON IMPLANTED A 13.2MM VICM5_13.2; -3.00 DIOPTER IMPLANTABLE COLLAMER LENS INTO THE PATIENT'S RIGHT EYE (OD) ON (B)(6)2023. THE PATIENT EXPERIENCED REFRACTIVE CHANGE OVER TIME. ON (B)(6)2023 THE LENS WAS EXPLANTED AND LATER ON THIS DATE REPLACED WITH A SAME LENGTH BUT DIFFERENT POWER LENS AND THIS RESOLVED THE PROBLEM. THE CAUSE OF THE EVENT …	Lens Exchange	Resolved
https://www.accessdata.fda.gov/scripts/cdrh/cfdocs/cfMAUDE/Detail.CFM?MDRFOI__ID=17818024&pc=MTA	2023826-2023-04288	2023-05-12	Injury	STAAR SURGICAL COMPANY	2023-09-26	MTA	IMPLANTABLE COLLAMER LENS (ICL)	Misfocusing	Blurred Vision	P030016	NA	1	Event Description: THE REPORTER INDICATED THAT THE SURGEON IMPLANTED A 12.6MM VICMO12.6, -10.5 DIOPTER IMPLANTABLE COLLAMER LENS INTO THE PATIENT'S LEFT EYE (OS) ON (B)(6) 2023. THE PATIENT EXPERIENCED REFRACTIVE SURPRISE. ON (B)(6) 2023 THE LENS WAS EXCHANGED WITH A SAME LENGTH BUT DIFFERENT MODEL AND POWER LENS. THIS RESOLVED THE PROBLEM. THE CAUSE OF THE EVENT WAS REPORTED AS UNKNOWN. Manufact…	Lens Exchange	Resolved
https://www.accessdata.fda.gov/scripts/cdrh/cfdocs/cfMAUDE/Detail.CFM?MDRFOI__ID=17477662&pc=MTA	2023826-2023-03352	2023-05-19	Injury	STAAR SURGICAL COMPANY	2023-08-08	MTA	IMPLANTABLE COLLAMER LENS (ICL)	Misfocusing	Blurred Vision	P030016	NA	1	Event Description: THE REPORTER INDICATED THAT A 13.2MM VICMO13.2 IMPLANTABLE COLLAMER LENS OF -4.0 DIOPTER WAS IMPLANTED INTO THE PATIENT'S LEFT EYE (OS) ON (B)(6) 2023. ON (B)(6) 2023 THE LENS WAS EXPLANTED DUE TO REFRACTIVE SURPRISE AND THE PROBLEM RESOLVED. CAUSE OF EVENT WAS UNKNOWN. Manufacturer Narrative: H6: DEVICE EVALUATION: LENS WAS RETURNED DRY WITH RESIDUE/DEBRIS ON PRODUCT IN A MICR…	Lens Extraction	Resolved
https://www.accessdata.fda.gov/scripts/cdrh/cfdocs/cfMAUDE/Detail.CFM?MDRFOI__ID=17840052&pc=MTA	2023826-2023-04284	2023-05-19	Injury	STAAR SURGICAL COMPANY	2023-09-28	MTA	IMPLANTABLE COLLAMER LENS (ICL)	Misfocusing	Blurred Vision	P030016	NA	1	Event Description: THE REPORTER INDICATED THAT A 12.1MM VICM5_12.1 IMPLANTABLE COLLAMER LENS OF -7.50 DIOPTER WAS IMPLANTED INTO THE PATIENT'S RIGHT EYE (OD) ON (B)(6) 2023. ON (B)(6) 2023 THE LENS WAS EXCHANGED FOR A DIFFERENT POWER LENS DUE TO REFRACTIVE SURPRISE. THE EXCHANGE RESOLVED THE PROBLEM. CAUSE WAS REPORTED AS UNKNOWN. Manufacturer Narrative: H3: DEVICE EVALUATION: THE LENS WAS RETURN…	Lens Exchange	Resolved
https://www.accessdata.fda.gov/scripts/cdrh/cfdocs/cfMAUDE/Detail.CFM?MDRFOI__ID=18803156&pc=MTA	2023826-2024-00837	2023-05-26	Injury	STAAR SURGICAL COMPANY	2024-02-28	MTA	IMPLANTABLE COLLAMER LENS (ICL)	Misfocusing	Blurred Vision	P030016	NA	1	Event Description: THE REPORTER INDICATED THAT A 13.2MM VICMO13.2 IMPLANTABLE COLLAMER LENS OF -6.0 DIOPTER WAS IMPLANTED INTO THE PATIENT'S RIGHT EYE (OD) ON (B)(6) 2023. ON (B)(6) 2024, THE LENS WAS EXCHANGED FOR SAME SIZE, DIFFERENT POWER LENS DUE TO REFRACTIVE SURPRISE AND REFRACTIVE CHANGE OVERTIME. THE PROBLEM WAS RESOLVED. CAUSE OF THE EVENT IS UNKNOWN. Manufacturer Narrative: A4: A6:UNK. …	Lens Exchange	Resolved
https://www.accessdata.fda.gov/scripts/cdrh/cfdocs/cfMAUDE/Detail.CFM?MDRFOI__ID=17633295&pc=MTA	2023826-2023-03533	2023-05-29	Injury	STAAR SURGICAL COMPANY	2023-08-28	MTA	IMPLANTABLE COLLAMER LENS (ICL)	Misfocusing	Blurred Vision	P030016	NA	1	Event Description: THE REPORTER INDICATED THAT A 13.2MM, VICMO 13.2, -4.0 DIOPTER, IMPLANTABLE COLLAMER LENS WAS IMPLANTED INTO THE PATIENT'S RIGHT EYE (OD) ON (B)(6) 2023. ON (B)(6) 2023 THE LENS WAS REPLACED WITH A SAME SIZE , DIFFERENT POWER (SPHERE/CYLINDER/AXIS) LENS DUE TO REFRACTIVE SURPRISE. THE PROBLEM WAS RESOLVED. CAUSE OF THE EVENT IS REPORTED AS UNKNOWN. Manufacturer Narrative: H6 - …	Lens Exchange	Resolved
https://www.accessdata.fda.gov/scripts/cdrh/cfdocs/cfMAUDE/Detail.CFM?MDRFOI__ID=17862008&pc=MTA	2023826-2023-04063	2023-06-09	Injury	STAAR SURGICAL COMPANY	2023-10-03	MTA	IMPLANTABLE COLLAMER LENS (ICL)	Misfocusing	Blurred Vision	P030016	NA	1	Event Description: THE REPORTER INDICATED THAT THE SURGEON IMPLANTED A 13.2MM VICMO13.2, -07.00 DIOPTER, IMPLANTABLE COLLAMER LENS INTO THE PATIENT'S RIGHT EYE (OD) IN (B)(6) 2021. REFRACTIVE CHANGE OVERTIME AND LOW VAULT WERE OBSERVED(ASSESSED ON (B)(6) 2022) . LENS WAS EXCHANGE WITH A DIFFERENT POWER LENS ON (B)(6) 2023. PROBLEM RESOLVED. CAUSE OF THE EVENT IS REPORTED AS UNKNOWN. Manufacturer …	Lens Exchange	Resolved
https://www.accessdata.fda.gov/scripts/cdrh/cfdocs/cfMAUDE/Detail.CFM?MDRFOI__ID=17455639&pc=MTA	2023826-2023-03219	2023-06-15	Injury	STAAR SURGICAL COMPANY	2023-08-03	MTA	IMPLANTABLE COLLAMER LENS (ICL)	Misfocusing	Blurred Vision	P030016	NA	1	Event Description: THE REPORTER INDICATED THAT A 13.2MM VICMO13.2 IMPLANTABLE COLLAMER LENS OF -6.0 DIOPTER WAS IMPLANTED INTO THE PATIENT'S LEFT EYE (OS) ON (B)(6) 2023. ON (B)(6) 2023, THE LENS WAS EXCHANGED FOR A TORIC LENS DUE TO BLURRED VISION. THE PROBLEM WAS RESOLVED. THE CAUSE OF THE EVENT IS UNKNOWN. REPORTEDLY, "REPLACE ASTIGMATIC CRYSTALS BASED ON POSTOPERATIVE OPTOMETRY RESULTS." Manu…	Lens Exchange	Resolved
https://www.accessdata.fda.gov/scripts/cdrh/cfdocs/cfMAUDE/Detail.CFM?MDRFOI__ID=17455641&pc=MTA	2023826-2023-03220	2023-06-15	Injury	STAAR SURGICAL COMPANY	2023-08-03	MTA	IMPLANTABLE COLLAMER LENS (ICL)	Misfocusing	Blurred Vision	P030016	NA	1	Event Description: THE REPORTER INDICATED THAT A 13.2MM VICMO13.2 IMPLANTABLE COLLAMER LENS OF -7.0 DIOPTER WAS IMPLANTED INTO THE PATIENT'S RIGHT EYE (OD) ON (B)(6) 2023. ON (B)(6) 2023, THE LENS WAS EXCHANGED FOR A TORIC LENS DUE TO BLURRED VISION. THE PROBLEM WAS RESOLVED. THE CAUSE OF THE EVENT IS UNKNOWN. REPORTEDLY, "REPLACE ASTIGMATIC CRYSTALS BASED ON POSTOPERATIVE OPTOMETRY RESULTS." Man…	Lens Exchange	Resolved
https://www.accessdata.fda.gov/scripts/cdrh/cfdocs/cfMAUDE/Detail.CFM?MDRFOI__ID=17358296&pc=MTA	2023826-2023-02969	2023-06-17	Malfunction	STAAR SURGICAL COMPANY	2023-07-20	MTA	IMPLANTABLE COLLAMER LENS (ICL)	Misfocusing	Blurred Vision	P030016	NA	1	Event Description: THE REPORTER INDICATED THAT A 12.0MM ICM120V4 IMPLANTABLE COLLAMER LENS OF A -16.5 DIOPTER WAS IMPLANTED INTO THE PATIENTS LEFT EYE (OS) ON (B)(6) 2012. REFRACTIVE CHANGE OVERTIME WAS OBSERVED. Manufacturer Narrative: A4-A6:UNK. H6: WORK ORDER SEARCH: NO SIMILAR COMPLAINTS WITHIN ASSOCIATED LOTS WERE FOUND. CLAIM# (B)(4).	Unknown	Unknown
https://www.accessdata.fda.gov/scripts/cdrh/cfdocs/cfMAUDE/Detail.CFM?MDRFOI__ID=17358386&pc=MTA	2023826-2023-02968	2023-06-17	Malfunction	STAAR SURGICAL COMPANY	2023-07-20	MTA	IMPLANTABLE COLLAMER LENS (ICL)	Misfocusing	Blurred Vision	P030016	NA	1	Event Description: THE REPORTER INDICATED THAT A 12.0MM ICM120V4 IMPLANTABLE COLLAMER LENS OF A -16 DIOPTER WAS IMPLANTED INTO THE PATIENTS RIGHT EYE (OD) ON (B)(6) 2012. REFRACTIVE CHANGE OVERTIME WAS OBSERVED. Manufacturer Narrative: A4-A6:UNK. H6: WORK ORDER SEARCH: NO SIMILAR COMPLAINTS WITHIN ASSOCIATED LOTS WERE FOUND. CLAIM# (B)(4).	Unknown	Unknown
https://www.accessdata.fda.gov/scripts/cdrh/cfdocs/cfMAUDE/Detail.CFM?MDRFOI__ID=17874320&pc=MTA	2023826-2023-04417	2023-07-04	Malfunction	STAAR SURGICAL COMPANY	2023-10-05	MTA	IMPLANTABLE COLLAMER LENS (ICL)	Misfocusing	Blurred Vision	P030016	NA	1	Event Description: THE REPORTER INDICATED THAT A 12.1MM VICM612.1 IMPLANTABLE COLLAMER LENS OF -8.50 DIOPTER WAS IMPLANTED INTO THE PATIENT'S LEFT EYE (OS) ON (B)(6) 2023. REFRACTIVE SURPRISE WAS REPORTED, LENS REMAINS IMPLANTED. IF ADDITIONAL INFORMATION IS RECEIVED A SUPPLEMENTAL MEDWATCH REPORT WILL BE SUBMITTED. Manufacturer Narrative: H6 - TYPE OF INVESTIGATION - LENS WORK ORDER SEARCH: NO S…	Lens Retention	Unknown
https://www.accessdata.fda.gov/scripts/cdrh/cfdocs/cfMAUDE/Detail.CFM?MDRFOI__ID=17581258&pc=MTA	2023826-2023-03589	2023-07-13	Injury	STAAR SURGICAL COMPANY	2023-08-20	MTA	IMPLANTABLE COLLAMER LENS (ICL)	Misfocusing	Blurred Vision	P030016	NA	1	Event Description: THE REPORTER INDICATED THAT A 12.6MM VICM5_12.6 IMPLANTABLE COLLAMER LENS OF -9.00 DIOPTER WAS IMPLANTED INTO THE PATIENT'S LEFT EYE (OS) ON (B)(6) 2023 . ON (B)(6) 2023 THE LENS WAS EXCHANGED FOR A DIFFERENT POWER LENS DUE TO TRANSIENT LOSS OF BCVA . THE EXCHANGE RESOLVED THE PROBLEM. CAUSE IS REPORTED AS UNKNOWN. Manufacturer Narrative: H6 - TYPE OF INVESTIGATION: 4110 - LENS…	Lens Exchange	Resolved
https://www.accessdata.fda.gov/scripts/cdrh/cfdocs/cfMAUDE/Detail.CFM?MDRFOI__ID=17581262&pc=MTA	2023826-2023-03588	2023-07-13	Injury	STAAR SURGICAL COMPANY	2023-08-20	MTA	IMPLANTABLE COLLAMER LENS (ICL)	Misfocusing	Blurred Vision	P030016	NA	1	Event Description: THE REPORTER INDICATED THAT A 12.6MM VICM5_12.6 IMPLANTABLE COLLAMER LENS OF -11.00 DIOPTER WAS IMPLANTED INTO THE PATIENT'S RIGHT EYE (OD) ON (B)(6) 2023. ON (B)(6) 2023 THE LENS WAS EXCHANGED FOR A DIFFERENT POWER LENS DUE TO TRANSIENT LOSS OF BCVA . THE EXCHANGE RESOLVED THE PROBLEM. CAUSE IS REPORTED AS UNKNOWN. Manufacturer Narrative: H6 - TYPE OF INVESTIGATION: 4110 - LEN…	Lens Exchange	Resolved
https://www.accessdata.fda.gov/scripts/cdrh/cfdocs/cfMAUDE/Detail.CFM?MDRFOI__ID=17545681&pc=MTA	2023826-2023-03517	2023-07-16	Injury	STAAR SURGICAL COMPANY	2023-08-14	MTA	IMPLANTABLE COLLAMER LENS (ICL)	Misfocusing	Blurred Vision	P030016	NA	1	Event Description: THE REPORTER INDICATED THAT A 13.2MM VICMO13.2 IMPLANTABLE COLLAMER LENS OF -4.5 DIOPTER WAS IMPLANTED INTO THE PATIENT'S LEFT EYE (OS) ON (B)(6) 2023. ON (B)(6) 2023 THE LENS WAS EXCHANGED FOR A DIFFERENT POWER LENS DUE TO REFRACTIVE SURPRISE. THE EXCHANGE RESOLVED THE PROBLEM. CAUSE OF EVENT WAS UNKNOWN. Manufacturer Narrative: DEVICE EVALUATION: H3 - TYPE OF INVESTIGATION CO…	Lens Exchange	Resolved
https://www.accessdata.fda.gov/scripts/cdrh/cfdocs/cfMAUDE/Detail.CFM?MDRFOI__ID=17761235&pc=MTA	2023826-2023-04075	2023-08-08	Injury	STAAR SURGICAL COMPANY	2023-09-15	MTA	IMPLANTABLE COLLAMER LENS (ICL)	Misfocusing	Blurred Vision	P030016	NA	1	Event Description: THE REPORTER INDICATED THAT THE SURGEON IMPLANTED A 12.6MM VICM5_12.6, -5.0 DIOPTER IMPLANTABLE COLLAMER LENS INTO THE PATIENT'S RIGHT EYE (OD) ON (B)(6) 2023. THE PATIENT EXPERIENCED REFRACTIVE SURPRISE. ON (B)(6) 2023 THE LENS WAS EXCHANGED WITH A SAME LENGTH LENS BUT DIFFERENT POWER. THIS RESOLVED THE PROBLEM. THE CAUSE OF THE EVENT WAS REPORTED AS UNKNOWN. Manufacturer Narr…	Lens Exchange	Resolved
https://www.accessdata.fda.gov/scripts/cdrh/cfdocs/cfMAUDE/Detail.CFM?MDRFOI__ID=18395190&pc=MTA	2023826-2023-05776	2023-08-13	Injury	STAAR SURGICAL COMPANY	2023-12-26	MTA	IMPLANTABLE COLLAMER LENS (ICL)	Misfocusing	Blurred Vision	P030016	NA	1	Event Description: THE REPORTER INDICATED THAT A 13.7MM VICMO 13.7 IMPLANTABLE COLLAMER LENS OF -13.00 DIOPTER WAS IMPLANTED INTO THE PATIENT'S RIGHT EYE (OD) ON (B)(6) 2023. REFRACTIVE SURPRISE WAS OBSERVED. ON (B)(6) 2023 THE LENS WAS EXCHANGED FOR A SAME MODEL AND SIZE LENS WITH DIFFERENT POWER AND THE PROBLEM WAS RESOLVED. CAUSE REPORTED AS UNKNOWN. Manufacturer Narrative: H6-INVESTIGATION TY…	Lens Exchange	Resolved
https://www.accessdata.fda.gov/scripts/cdrh/cfdocs/cfMAUDE/Detail.CFM?MDRFOI__ID=18370009&pc=MTA	2023826-2023-05621	2023-08-21	Injury	STAAR SURGICAL COMPANY	2023-12-20	MTA	IMPLANTABLE COLLAMER LENS (ICL)	Misfocusing	Blurred Vision	P030016	NA	1	Event Description: THE REPORTER INDICATED THAT A 13.2MM VICMO 13.2 IMPLANTABLE COLLAMER LENS OF -4.00 DIOPTER WAS IMPLANTED INTO THE PATIENT'S RIGHT EYE (OD) ON (B)(6) 2023. REFRACTIVE SURPRISE WAS OBSERVED. ON (B)(6) 2023 THE LENS WAS EXCHANGED FOR A SAME MODEL AND SIZE LENS BUT DIFFERENT DIOPTER AND THE PROBLEM WAS RESOLVED. CAUSE REPORTED AS USER ERROR. "DOCTOR CALCULATED LENS WRONGLY." Manufa…	Lens Exchange	Resolved
https://www.accessdata.fda.gov/scripts/cdrh/cfdocs/cfMAUDE/Detail.CFM?MDRFOI__ID=18375462&pc=MTA	2023826-2023-05765	2023-08-22	Injury	STAAR SURGICAL COMPANY	2023-12-21	MTA	IMPLANTABLE COLLAMER LENS (ICL)	Misfocusing	Blurred Vision	P030016	NA	1	Event Description: THE REPORTER INDICATED THAT THE SURGEON IMPLANTED A 12.6MM VICM5_12.6; -1.25 DIOPTER IMPLANTABLE COLLAMER LENS INTO THE PATIENT'S LEFT EYE (OS) ON (B)(3) 2023. THE PATIENT EXPERIENCED REFRACTIVE SURPRISE. ON (B)(3) 2023 THE LENS WAS EXCHANGED WITH A SAME LENGTH BUT DIFFERENT POWER LENS AND THIS RESOLVED THE PROBLEM. Manufacturer Narrative: H6 - TYPE OF INVESTIGATION: 4110 - LEN…	Lens Exchange	Resolved
https://www.accessdata.fda.gov/scripts/cdrh/cfdocs/cfMAUDE/Detail.CFM?MDRFOI__ID=18560295&pc=MTA	2023826-2024-00361	2023-08-22	Injury	STAAR SURGICAL COMPANY	2024-01-22	MTA	IMPLANTABLE COLLAMER LENS (ICL)	Misfocusing	Blurred Vision	P030016	NA	1	Event Description: THE REPORTER INDICATED THAT A 12.6MM VICM5_12.6 IMPLANTABLE COLLAMER LENS OF -4.50 DIOPTER WAS IMPLANTED INTO THE PATIENT'S RIGHT EYE (OD). ON (B)(6) 2023 THE LENS WAS EXCHANGED FOR A DIFFERENT POWER LENS DUE TO REFRACTIVE SURPRISE. ADDITIONAL INFORMATION HAS BEEN REQUESTED BUT NONE HAS BEEN FORTHCOMING. IF ADDITIONAL INFORMATION IS RECEIVED A SUPPLEMENTAL MEDWATCH REPORT WILL …	Lens Exchange	Unknown
https://www.accessdata.fda.gov/scripts/cdrh/cfdocs/cfMAUDE/Detail.CFM?MDRFOI__ID=17694988&pc=MTA	2023826-2023-03947	2023-08-25	Malfunction	STAAR SURGICAL COMPANY	2023-09-06	MTA	IMPLANTABLE COLLAMER LENS (ICL)	Misfocusing	Blurred Vision	P030016	NA	1	Event Description: THE REPORTER INDICATED THAT THE SURGEON IMPLANTED A 13.2MM VICM5_13.2, -5.0 DIOPTER IMPLANTABLE COLLAMER LENS INTO THE PATIENT'S RIGHT EYE (OD) ON (B)(6) 2023. IT WAS REPORTED THAT THE PATIENT HAS REFRACTIVE SURPRISE. THE SURGEON PERFORMED LRI SURGERY. LENS REMAINS IMPLANTED. IT WAS REPORTED THAT THE CAUSE OF THE EVENT WAS REPORTED AS A USER ERROR WITH NO DEVICE CAUSALITY AND N…	Lens Retention + Secondary Operation	Not_Resolved
https://www.accessdata.fda.gov/scripts/cdrh/cfdocs/cfMAUDE/Detail.CFM?MDRFOI__ID=17694989&pc=MTA	2023826-2023-03948	2023-08-25	Malfunction	STAAR SURGICAL COMPANY	2023-09-06	MTA	IMPLANTABLE COLLAMER LENS (ICL)	Misfocusing	Blurred Vision	P030016	NA	1	Event Description: THE REPORTER INDICATED THAT THE SURGEON IMPLANTED A 13.2MM VICM5_13.2, -5.50 DIOPTER IMPLANTABLE COLLAMER LENS INTO THE PATIENT'S LEFT EYE (OS) ON 20-JUL-2023. IT WAS REPORTED THAT THE PATIENT HAS REFRACTIVE SURPRISE. THE SURGEON PERFORMED LRI SURGERY. LENS REMAINS IMPLANTED. IT WAS REPORTED THAT THE CAUSE OF THE EVENT WAS REPORTED AS A USER ERROR WITH NO DEVICE CAUSALITY AND N…	Lens Retention + Secondary Operation	Not_Resolved
https://www.accessdata.fda.gov/scripts/cdrh/cfdocs/cfMAUDE/Detail.CFM?MDRFOI__ID=18271396&pc=MTA	2023826-2023-05501	2023-08-25	Injury	STAAR SURGICAL COMPANY	2023-12-05	MTA	IMPLANTABLE COLLAMER LENS (ICL)	Misfocusing	Blurred Vision	P030016	NA	1	Event Description: THE REPORTER INDICATED THAT A 12.6MM VICMO12.6 IMPLANTABLE COLLAMER LENS OF -5.0 DIOPTER WAS IMPLANTED INTO THE PATIENT'S LEFT EYE (OS) ON (B)(6) 2023. ON (B)(6) 2023 THE LENS WAS EXCHANGED FOR A TORIC LENS OF DIFFERENT POWER DUE TO REFRACTIVE SURPRISE. THE EXCHANGE RESOLVED THE PROBLEM. CAUSE OF EVENT WAS UNKNOWN. Manufacturer Narrative: H6 - TYPE OF INVESTIGATION - LENS WORK …	Lens Exchange	Resolved
https://www.accessdata.fda.gov/scripts/cdrh/cfdocs/cfMAUDE/Detail.CFM?MDRFOI__ID=17891552&pc=MTA	2023826-2023-04271	2023-08-27	Injury	STAAR SURGICAL COMPANY	2023-10-06	MTA	IMPLANTABLE COLLAMER LENS (ICL)	Misfocusing	Blurred Vision	P030016	NA	1	Event Description: THE REPORTER INDICATED THAT A 13.7MM VICM5 13.7 IMPLANTABLE COLLAMER LENS OF -13.00 DIOPTER WAS IMPLANTED INTO THE PATIENT'S RIGHT EYE (OD) ON AN UNKNOWN DATE. EXCESSIVE VAULT WAS REPORTED AND BLURRED VISION. THE LENS REMAINS IMPLANTED. CAUSE REPORTED AS DEVICE. Manufacturer Narrative: H6-INVESTIGATION TYPE 4110: LENS WORK ORDER SEARCH- NO SIMILAR COMPLAINT EVENT(S) WITHIN ASSO…	Lens Exchange	Resolved
https://www.accessdata.fda.gov/scripts/cdrh/cfdocs/cfMAUDE/Detail.CFM?MDRFOI__ID=18233713&pc=MTA	2023826-2023-05366	2023-08-31	Injury	STAAR SURGICAL COMPANY	2023-11-29	MTA	IMPLANTABLE COLLAMER LENS (ICL)	Misfocusing	Blurred Vision	P030016	NA	1	Event Description: THE REPORTER INDICATED THAT A 13.2MM VICMO13.2 IMPLANTABLE COLLAMER LENS OF -17.0 DIOPTER WAS IMPLANTED INTO THE PATIENT'S LEFT EYE (OS) ON (B)(6) 2023. ON (B)(6) 2023, THE LENS WAS EXCHANGED FOR A REPLACEMENT LENS AND THE PROBLEM WAS RESOLVED. CAUSE OF THE EVENT IS UNKNOWN. Manufacturer Narrative: H6: WORK ORDER SEARCH: NO SIMILAR COMPLAINTS WITHIN ASSOCIATED LOTS WERE FOUND. …	Lens Exchange	Resolved
https://www.accessdata.fda.gov/scripts/cdrh/cfdocs/cfMAUDE/Detail.CFM?MDRFOI__ID=18057401&pc=MTA	2023826-2023-04943	2023-09-14	Injury	STAAR SURGICAL COMPANY	2023-11-02	MTA	IMPLANTABLE COLLAMER LENS (ICL)	Misfocusing	Blurred Vision	P030016	NA	1	Event Description: THE REPORTER INDICATED THAT THE SURGEON IMPLANTED A 13.2M VICMO13.2; -12.0 DIOPTER IMPLANTABLE COLLAMER LENS INTO THE PATIENT'S LEFT EYE (OS) ON (B)(6) 2023. THE PATIENT EXPERIENCED REFRACTIVE SURPRISE. ON (B)(6) 2023 THE LENS WAS EXCHANGED WITH A SAME LENGTH BUT DIFFERENT POWER LENS AND THIS RESOLVED THE PROBLEM. THE CAUSE OF THE EVENT WAS REPORTED AS UNKNOWN. Manufacturer Nar…	Lens Exchange	Resolved
https://www.accessdata.fda.gov/scripts/cdrh/cfdocs/cfMAUDE/Detail.CFM?MDRFOI__ID=18066236&pc=MTA	2023826-2023-04855	2023-09-15	Injury	STAAR SURGICAL COMPANY	2023-11-03	MTA	IMPLANTABLE COLLAMER LENS (ICL)	Misfocusing	Blurred Vision	P030016	NA	1	Event Description: THE REPORTER INDICATED THAT A 12.1MM VICMO12.1 IMPLANTABLE COLLAMER LENS OF -14.0 DIOPTER WAS IMPLANTED INTO THE PATIENT'S RIGHT EYE (OD) ON (B)(6) 2023. ON (B)(6) 2023, THE LENS WAS EXCHANGED DUE TO REFRACTIVE SUPRISE. THE PROBLEM WAS RESOLVED. CAUSE OF THE EVENT IS UNKNOWN. Manufacturer Narrative: H6: WORK ORDER SEARCH: NO SIMILAR COMPLAINTS WITHIN ASSOCIATED LOTS WERE FOUND.…	Lens Exchange	Resolved
https://www.accessdata.fda.gov/scripts/cdrh/cfdocs/cfMAUDE/Detail.CFM?MDRFOI__ID=18136064&pc=MTA	2023826-2023-05082	2023-09-15	Injury	STAAR SURGICAL COMPANY	2023-11-14	MTA	IMPLANTABLE COLLAMER LENS (ICL)	Misfocusing	Blurred Vision	P030016	NA	1	Event Description: THE REPORTER INDICATED THAT A 12.6MM VICMO12.6 IMPLANTABLE COLLAMER LENS OF -5.0 DIOPTER WAS IMPLANTED INTO THE PATIENT'S RIGHT EYE (OD) ON (B)(6) 2023. ON (B)(6) 2023, THE LENS WAS EXCHANGED FOR A TORIC MODEL LENS DUE TO REFRACTIVE SUPRISE. THE PROBLEM WAS RESOLVED. CAUSE OF THE EVENT IS UNKNOWN. Manufacturer Narrative: H6: WORK ORDER SEARCH: NO SIMILAR COMPLAINTS WITHIN ASSOC…	Lens Exchange	Resolved
https://www.accessdata.fda.gov/scripts/cdrh/cfdocs/cfMAUDE/Detail.CFM?MDRFOI__ID=18136489&pc=MTA	2023826-2023-05058	2023-09-16	Injury	STAAR SURGICAL COMPANY	2023-11-14	MTA	IMPLANTABLE COLLAMER LENS (ICL)	Misfocusing	Blurred Vision	P030016	NA	1	Event Description: THE REPORTER INDICATED THAT A 12.6MM VICMO12.6 IMPLANTABLE COLLAMER LENS OF -4.0 DIOPTER WAS IMPLANTED INTO THE PATIENT'S LEFT EYE (OS) ON (B)(6) 2023. ON (B)(6) 2023 THE LENS WAS EXCHANGED FOR A TORIC LENS OF DIFFERENT POWER DUE TO REFRACTIVE SURPRISE. THE EXCHANGE RESOLVED THE PROBLEM. CAUSE OF EVENT WAS UNKNOWN. Manufacturer Narrative: H6 - TYPE OF INVESTIGATION - LENS WORK …	Lens Exchange	Resolved
https://www.accessdata.fda.gov/scripts/cdrh/cfdocs/cfMAUDE/Detail.CFM?MDRFOI__ID=18478055&pc=MTA	2023826-2024-00053	2023-09-28	Injury	STAAR SURGICAL COMPANY	2024-01-09	MTA	IMPLANTABLE COLLAMER LENS (ICL)	Misfocusing	Blurred Vision	P030016	NA	1	Event Description: THE REPORTER INDICATED THAT A 13.2MM VICMO 13.2 IMPLANTABLE COLLAMER LENS OF -10.00 DIOPTER WAS IMPLANTED INTO THE PATIENTS RIGHT EYE (OD) ON (B)(6) 2023. ON THE SAME DAY DIFFERENT SURGERY THE LENS WAS EXCHANGED FOR A SHORTER LENS DUE TO REFRACTIVE SURPRISE AND THE PROBLEM WAS RESOLVED. Manufacturer Narrative: H6-INVESTIGATION TYPE 4110: LENS WORK ORDER SEARCH- NO SIMILAR COMPL…	Lens Exchange	Resolved
https://www.accessdata.fda.gov/scripts/cdrh/cfdocs/cfMAUDE/Detail.CFM?MDRFOI__ID=18416892&pc=MTA	2023826-2023-05827	2023-09-29	Injury	STAAR SURGICAL COMPANY	2023-12-29	MTA	IMPLANTABLE COLLAMER LENS (ICL)	Misfocusing	Blurred Vision	P030016	NA	1	Event Description: THE REPORTER INDICATED THAT A 12.1MM VICMO12.1 IMPLANTABLE COLLAMER LENS OF -11.50 DIOPTER WAS IMPLANTED INTO THE PATIENT'S LEFT EYE (OS) ON (B)(6) 2023. ON (B)(6) 2023 THE LENS WAS EXCHANGED FOR A LENS OF DIFFERENT POWER DUE TO REFRACTIVE SURPRISE AND THE PROBLEM RESOLVED. CAUSE OF EVENT WAS UNKNOWN. Manufacturer Narrative: H6 - TYPE OF INVESTIGATION - LENS WORK ORDER SEARCH: …	Lens Exchange	Resolved
https://www.accessdata.fda.gov/scripts/cdrh/cfdocs/cfMAUDE/Detail.CFM?MDRFOI__ID=18062883&pc=MTA	2023826-2023-04964	2023-10-04	Malfunction	STAAR SURGICAL COMPANY	2023-11-03	MTA	IMPLANTABLE COLLAMER LENS (ICL)	Misfocusing	Blurred Vision	P030016	NA	1	Event Description: THE REPORTER INDICATED THAT A 13.2MM VICMO13.2 IMPLANTABLE COLLAMER LENS OF -14.50 DIOPTER WAS IMPLANTED INTO THE PATIENT'S LEFT EYE (OS) ON (B)(6) 2023. REFRACTIVE SURPRISE WAS REPORTED, LENS REMAINS IMPLANTED. IN THE REPORTERS OPINION THE CAUSE OF THE EVENT IS USER ERROR. THE REPORTER STATES THAT THE DEVICE DID NOT FAIL TO PERFORM AS INTENDED. ADDITIONAL INFORMATION HAS BEEN …	Lens Exchange	Resolved
https://www.accessdata.fda.gov/scripts/cdrh/cfdocs/cfMAUDE/Detail.CFM?MDRFOI__ID=18323057&pc=MTA	2023826-2023-05653	2023-10-10	Injury	STAAR SURGICAL COMPANY	2023-12-13	MTA	IMPLANTABLE COLLAMER LENS (ICL)	Misfocusing	Blurred Vision	P030016	NA	1	Event Description: THE REPORTER INDICATED THAT THE SURGEON IMPLANTED A 13.2MM VICM5_13.2 IMPLANTABLE COLLAMER LENS OF -3.5 DIOPTER INTO THE PATIENT'S RIGHT EYE (OD) ON (B)(6) 2023. THE LENS WAS REMOVED DUE TO REFRACTIVE CHANGE OVERTIME. ON (B)(6) 2023 A REPLACEMENT LENS OF DIFFERENT POWER WAS IMPLANTED AND THE PROBLEM RESOLVED. CAUSE OF EVENT REPORTED AS UNKNOWN. Manufacturer Narrative: H6 - TYPE…	Lens Exchange	Resolved
https://www.accessdata.fda.gov/scripts/cdrh/cfdocs/cfMAUDE/Detail.CFM?MDRFOI__ID=18478523&pc=MTA	2023826-2024-00054	2023-10-17	Injury	STAAR SURGICAL COMPANY	2024-01-09	MTA	IMPLANTABLE COLLAMER LENS (ICL)	Misfocusing	Blurred Vision	P030016	NA	1	Event Description: THE REPORTER INDICATED THAT A 13.2MM VICMO 13.2 IMPLANTABLE COLLAMER LENS OF -8.00 DIOPTER WAS IMPLANTED INTO THE PATIENTS RIGHT EYE (OD) ON (B)(6) 2021. REFRACTIVE SURPRISE WAS OBSERVED. ON (B)(6) 2023 THE LENS WAS EXCHANGED FOR A LONGER LENGTH TORIC LENS AND THE PROBLEM WAS RESOLVED. Manufacturer Narrative: H6-INVESTIGATION TYPE 4110: LENS WORK ORDER SEARCH- NO SIMILAR COMPLA…	Lens Exchange	Resolved
https://www.accessdata.fda.gov/scripts/cdrh/cfdocs/cfMAUDE/Detail.CFM?MDRFOI__ID=18271708&pc=MTA	2023826-2023-05505	2023-10-19	Injury	STAAR SURGICAL COMPANY	2023-12-05	MTA	IMPLANTABLE COLLAMER LENS (ICL)	Misfocusing	Blurred Vision	P030016	NA	1	Event Description: THE REPORTER INDICATED THAT A 13.2MM VICM5_13.2 IMPLANTABLE COLLAMER LENS OF -6.00 DIOPTER WAS IMPLANTED INTO THE PATIENT'S LEFT EYE (OS) ON (B)(6) 2023. REFRACTIVE SURPRISE WAS REPORTED, LENS REMAINS IMPLANTED. IF ADDITIONAL INFORMATION IS RECEIVED A SUPPLEMENTAL MEDWATCH REPORT WILL BE SUBMITTED. Manufacturer Narrative: H6 - TYPE OF INVESTIGATION - LENS WORK ORDER SEARCH: NO …	Lens Exchange	Resolved
https://www.accessdata.fda.gov/scripts/cdrh/cfdocs/cfMAUDE/Detail.CFM?MDRFOI__ID=18258189&pc=MTA	2023826-2023-05312	2023-10-25	Injury	STAAR SURGICAL COMPANY	2023-12-04	MTA	IMPLANTABLE COLLAMER LENS (ICL)	Misfocusing	Blurred Vision	P030016	NA	1	Event Description: THE REPORTER INDICATED THAT A 13.2MM, VICM5_13.2, -7.0 DIOPTER, IMPLANTABLE COLLAMER LENS WAS IMPLANTED INTO THE PATIENT'S LEFT EYE (OS) ON (B)(6) 2023. ON (B)(6) 2023 THE LENS WAS REPLACED WITH A SAME SIZE , DIFFERENT DIOPTER LENS DUE TO REFRACTIVE SURPRISE(ASSESSED ON (B)(6) 2023). THE PROBLEM WAS RESOLVED. Manufacturer Narrative: A4 - UNK. A5 - UNK. A6 - UNK. H6 - WORK ORDER…	Lens Exchange	Resolved
https://www.accessdata.fda.gov/scripts/cdrh/cfdocs/cfMAUDE/Detail.CFM?MDRFOI__ID=18258205&pc=MTA	2023826-2023-05311	2023-10-25	Injury	STAAR SURGICAL COMPANY	2023-12-04	MTA	IMPLANTABLE COLLAMER LENS (ICL)	Misfocusing	Blurred Vision	P030016	NA	1	Event Description: THE REPORTER INDICATED THAT A 13.2MM, VICM5_13.2, -7.0 DIOPTER, IMPLANTABLE COLLAMER LENS WAS IMPLANTED INTO THE PATIENT'S RIGHT EYE (OD) ON (B)(6) 2023. ON (B)(6) 2023 THE LENS WAS REPLACED WITH A SAME SIZE , DIFFERENT DIOPTER (SPHERE/CYLINDER/AXIS) LENS DUE TO REFRACTIVE SURPRISE(ASSESSED ON (B)(6) 2023). THE PROBLEM WAS RESOLVED. Manufacturer Narrative: H6 - WORK ORDER SEARC…	Lens Exchange	Resolved
https://www.accessdata.fda.gov/scripts/cdrh/cfdocs/cfMAUDE/Detail.CFM?MDRFOI__ID=18196960&pc=MTA	2023826-2023-05303	2023-10-27	Injury	STAAR SURGICAL COMPANY	2023-11-22	MTA	IMPLANTABLE COLLAMER LENS (ICL)	Misfocusing	Blurred Vision	P030016	NA	1	Event Description: THE REPORTER INDICATED THAT A 13.2MM VICM5_13.2 IMPLANTABLE COLLAMER LENS OF -10.00 DIOPTER WAS IMPLANTED INTO THE PATIENT'S RIGHT EYE (OD) ON 18- SEP-2023. REFRACTIVE SURPRISE WAS REPORTED, LENS REMAINS IMPLANTED. IF ADDITIONAL INFORMATION IS RECEIVED A SUPPLEMENTAL MEDWATCH REPORT WILL BE SUBMITTED. Manufacturer Narrative: H6 - TYPE OF INVESTIGATION - LENS WORK ORDER SEARCH: …	Lens Extraction	Unknown
https://www.accessdata.fda.gov/scripts/cdrh/cfdocs/cfMAUDE/Detail.CFM?MDRFOI__ID=18321863&pc=MTA	2023826-2023-05652	2023-11-02	Malfunction	STAAR SURGICAL COMPANY	2023-12-13	MTA	IMPLANTABLE COLLAMER LENS (ICL)	Misfocusing	Blurred Vision	P030016	NA	1	Event Description: THE REPORTER INDICATED THAT A 13.2MM VICM5_13.2 IMPLANTABLE COLLAMER LENS OF -9.5 DIOPTER WAS IMPLANTED INTO THE PATIENT'S RIGHT EYE (OD). REFRACTIVE SURPRISE WAS REPORTED, LENS REMAINS IMPLANTED. CAUSE OF EVEN WAS UNKNOWN. IF ADDITIONAL INFORMATION IS RECEIVED A SUPPLEMENTAL MEDWATCH REPORT WILL BE SUBMITTED. Manufacturer Narrative: CLAIM# (B)(4). Manufacturer Narrative: H6 - …	Lens Retention	Unknown
https://www.accessdata.fda.gov/scripts/cdrh/cfdocs/cfMAUDE/Detail.CFM?MDRFOI__ID=18522597&pc=MTA	2023826-2024-00230	2023-11-27	Injury	STAAR SURGICAL COMPANY	2024-01-16	MTA	IMPLANTABLE COLLAMER LENS (ICL)	Misfocusing	Blurred Vision	P030016	NA	1	Event Description: THE REPORTER INDICATED THAT A 12.6MM VICM5_12.6 IMPLANTABLE COLLAMER LENS OF -5.00 DIOPTER WAS IMPLANTED INTO THE PATIENT'S RIGHT EYE (OD) ON (B)(6) 2023. ON (B)(6) 2023 THE LENS WAS EXCHANGED FOR A DIFFERENT POWER LENS DUE TO REFRACTIVE SURPRISE AND THE PROBLEM RESOLVED. CAUSE OF EVENT WAS UNKNOWN. Manufacturer Narrative: H6 - TYPE OF INVESTIGATION - LENS WORK ORDER SEARCH: NO…	Lens Exchange	Resolved
https://www.accessdata.fda.gov/scripts/cdrh/cfdocs/cfMAUDE/Detail.CFM?MDRFOI__ID=10856340&pc=MTA	2023826-2020-02698	NA	Injury	STAAR SURGICAL COMPANY	2020-11-17	MTA	IMPLANTABLE COLLAMER LENS (ICL)	Misfocusing	Blurred Vision	N/A	NA	1	Event Description: THE REPORTER INDICATED THAT THE SURGEON IMPLANTED A 13.2MM VICM5_13.2, -7.5 DIOPTER IMPLANTABLE COLLAMER LENS INTO THE PATIENT'S RIGHT EYE (OD). THE SURGEON REPORTS RESIDUAL REFRACTIVE ERROR WHICH HAD TO BE CORRECTED WITH LASIK. Manufacturer Narrative: THIS PRODUCT IS MANUFACTURED IN THE U.S. BUT NOT MARKETED IN THE U.S. LENS WORK ORDER SEARCH-NO SIMILAR COMPLAINT TYPE EVENTS R…	Unknown	Unknown
https://www.accessdata.fda.gov/scripts/cdrh/cfdocs/cfMAUDE/Detail.CFM?MDRFOI__ID=11308938&pc=MTA	2023826-2021-00226	NA	Malfunction	STAAR SURGICAL COMPANY	2021-02-10	MTA	IMPLANTABLE COLLAMER LENS (ICL)	Misfocusing	Blurred Vision	N/A	NA	1	Event Description: THE REPORTER INDICATED THAT A 12.1MM, VICM5 12.1, -12.50 DIOPTER, IMPLANTABLE COLLAMER LENS WAS IMPLANTED INTO THE PATIENT'S RIGHT EYE (OD). REFRACTIVE SURPRISE WAS OBSERVED, THE LENS REMAINS IMPLANTED. ON (B)(6) 2020 REFRACTIVE TREATMENT (LASIK, PRK, ETC.) WAS PERFORMED. REPORTEDLY, "THE AMOUNT OF HIPER CORRECTION IS ONLY XPLAINED BY A MISTAKE IN THE LENS POWER. ADDITIONAL INF…	Lens Retention	Unknown
https://www.accessdata.fda.gov/scripts/cdrh/cfdocs/cfMAUDE/Detail.CFM?MDRFOI__ID=12148271&pc=MTA	2023826-2021-02474	NA	Injury	STAAR SURGICAL COMPANY	2021-07-11	MTA	IMPLANTABLE COLLAMER LENS	Misfocusing	Blurred Vision	NA	NA	1	Event Description: THE REPORTER INDICATED THAT THE SURGEON IMPLANTED A 12.6MM VICM5_12.6 IMPLANTABLE COLLAMER LENS, -2.5 DIOPTER INTO THE PATIENT'S RIGHT EYE (OD). REPORTEDLY, THE LENS WAS "CHANGED" DUE TO REFRACTION ERROR. ATTEMPTS TO OBTAIN ADDITIONAL INFORMATION HAVE NOT BEEN SUCCESSFUL. Manufacturer Narrative: PT INFO: UNK. DATE OF EVENT - UNK. PMA/510(K): THIS PRODUCT IS MANUFACTURED IN THE …	Lens Retention	Unknown
https://www.accessdata.fda.gov/scripts/cdrh/cfdocs/cfMAUDE/Detail.CFM?MDRFOI__ID=13657017&pc=MTA	2023826-2022-00665	NA	Malfunction	STAAR SURGICAL COMPANY	2022-03-02 05:00:00	MTA	IMPLANTABLE COLLAMER LENS (ICL)	Misfocusing	Blurred Vision	NA	NA	1	Event Description: THE REPORTER INDICATED THAT THE SURGEON IMPLANTED A 13.7MM VICM6_13.7; -10.50 DIOPTER IMPLANTABLE COLLAMER LENS INTO THE PATIENT'S LEFT EYE (OS) ON (B)(6) 2021. THE PATIENT EXPERIENCED REFRACTIVE SURPRISE. THE POST OP REPORT INDICATES "SHE SAYS THAT SEEING IS BETTER OVERALL. ESPECIALLY IN THE DISTANCE. HOWEVER; SHE IS NOW USING READING GLASSES WITH +2.00DPT. I GAVE HER CONTACT …	Lens Retention	Not_Resolved
https://www.accessdata.fda.gov/scripts/cdrh/cfdocs/cfMAUDE/Detail.CFM?MDRFOI__ID=13657018&pc=MTA	2023826-2022-00664	NA	Malfunction	STAAR SURGICAL COMPANY	2022-03-02 05:00:00	MTA	IMPLANTABLE COLLAMER LENS (ICL)	Misfocusing	Blurred Vision	NA	NA	1	Event Description: THE REPORTER INDICATED THAT THE SURGEON IMPLANTED A 13.7MM VICM5_13.7; -9.50 DIOPTER IMPLANTABLE COLLAMER LENS INTO THE PATIENT'S RIGHT EYE (OD) ON (B)(6) 2021. THE PATIENT EXPERIENCED REFRACTIVE SURPRISE. THE POST OP REPORT INDICATES "SHE SAYS THAT SEEING IS BETTER OVERALL. ESPECIALLY IN THE DISTANCE. HOWEVER; SHE IS NOW USING READING GLASSES WITH +2.00DPT. I GAVE HER CONTACT …	Lens Retention	Unknown
https://www.accessdata.fda.gov/scripts/cdrh/cfdocs/cfMAUDE/Detail.CFM?MDRFOI__ID=14283152&pc=MTA	2023826-2022-01402	NA	Malfunction	STAAR SURGICAL COMPANY	2022-05-04 04:00:00	MTA	IMPLANTABLE COLLAMER LENS (ICL)	Misfocusing	Blurred Vision	NA	NA	1	Event Description: THE REPORTER INDICATED THAT THE SURGEON IMPLANTED A 13.7MM VICM5_13.7; -5.00 DIOPTER IMPLANTABLE COLLAMER LENS INTO THE PATIENT'S LEFT EYE ON (B)(6) 2022; AS A REPLACEMENT LENS TO A PREVIOUS LOW VAULTING AND CATARACT ISSUE. IT WAS MENTIONED THE PROBLEM WAS RESOLVED; HOWEVER NOTED "AFTER LENS REPLACEMENT THERE IS A DECREASE IN VISUAL ACUITY; BUT THE PATIENT IS UNDER OBSERVATION.…	Lens Exchange	Unknown
https://www.accessdata.fda.gov/scripts/cdrh/cfdocs/cfMAUDE/Detail.CFM?MDRFOI__ID=14749667&pc=MTA	2023826-2022-01944	NA	Malfunction	STAAR SURGICAL COMPANY	2022-06-20 04:00:00	MTA	IMPLANTABLE COLLAMER LENS (ICL)	Misfocusing	Blurred Vision	NA	NA	1	Event Description: THE REPORTER INDICATED THAT THE SURGEON IMPLANTED A 13.2MM VICM6_13.2; -7.5 DIOPTER IMPLANTABLE COLLAMER LENS INTO THE PATIENT'S LEFT EYE (OS). THERE WAS REFRACTIVE SURPRISE REPORTED. LENS REMAINS IMPLANTED. Manufacturer Narrative: PMA/510(K): THIS PRODUCT IS MANUFACTURED IN THE U.S. BUT NOT MARKETED IN THE U.S. CLAIM#: (B)(4).	Lens Retention	Unknown
https://www.accessdata.fda.gov/scripts/cdrh/cfdocs/cfMAUDE/Detail.CFM?MDRFOI__ID=14749668&pc=MTA	2023826-2022-01943	NA	Malfunction	STAAR SURGICAL COMPANY	2022-06-20 04:00:00	MTA	IMPLANTABLE COLLAMER LENS (ICL)	Misfocusing	Blurred Vision	NA	NA	1	Event Description: THE REPORTER INDICATED THAT THE SURGEON IMPLANTED A 13.2MM VICM6_13.2; -6.5 DIOPTER IMPLANTABLE COLLAMER LENS INTO THE PATIENT'S RIGHT EYE (OD). THERE WAS REFRACTIVE SURPRISE REPORTED. LENS REMAINS IMPLANTED. Manufacturer Narrative: PMA/510(K): THIS PRODUCT IS MANUFACTURED IN THE U.S. BUT NOT MARKETED IN THE U.S. CLAIM#: (B)(4).	Lens Retention	Unknown
https://www.accessdata.fda.gov/scripts/cdrh/cfdocs/cfMAUDE/Detail.CFM?MDRFOI__ID=15282555&pc=MTA	2023826-2022-02879	NA	Injury	STAAR SURGICAL COMPANY	2022-08-24 04:00:00	MTA	IMPLANTABLE COLLAMER LENS (ICL)	Misfocusing	Blurred Vision	P030016	NA	1	Event Description: THE REPORTER INDICATED THAT A 12.1MM VICM512.1 IMPLANTABLE COLLAMER LENS OF -8.0 DIOPTER WAS IMPLANTED IN THE PATIENT'S RIGHT EYE (OD) ON (B)(6) 2021. ON (B)(6) 2022, THE LENS WAS EXCHANGED FOR A TORIC MODEL LENS DUE TO REFRACTIVE SURPRISE. STATUS OF THE EYE IS REPORTED AS "RESOLVED." CAUSE OF THE EVENT IS USER ERROR. REPORTEDLY, "NEEDED A TORIC RATHER THAN A SPHERICAL LENS." M…	Lens Exchange	Resolved
https://www.accessdata.fda.gov/scripts/cdrh/cfdocs/cfMAUDE/Detail.CFM?MDRFOI__ID=15709881&pc=MTA	2023826-2022-03909	NA	Injury	STAAR SURGICAL COMPANY	2022-11-01 04:00:00	MTA	IMPLANTABLE COLLAMER LENS (ICL)	Misfocusing	Blurred Vision	P030016	NA	1	Event Description: THE REPORTER INDICATED THAT THE SURGEON IMPLANTED A VICM6; -10.50 DIOPTER IMPLANTABLE COLLAMER LENS INTO THE PATIENT'S RIGHT EYE (OD) ON (B)(6) 2021. IT WAS INDICATED THAT THE PATIENT HAD RESIDUAL REFRACTION AFTER IMPLANTATION. LASIK SURGERY WAS PERFORMED INITIALLY ON (B)(6) 2022 AND A LASIK REVISION ON (B)(6) 2022. LENS REMAINS IMPLANTED. IF ADDITIONAL INFORMATION IS RECEIVED …	Lens Retention + Secondary Operation	Unknown
https://www.accessdata.fda.gov/scripts/cdrh/cfdocs/cfMAUDE/Detail.CFM?MDRFOI__ID=15709888&pc=MTA	2023826-2022-03910	NA	Injury	STAAR SURGICAL COMPANY	2022-11-01 04:00:00	MTA	IMPLANTABLE COLLAMER LENS (ICL)	Misfocusing	Blurred Vision	P030016	NA	1	Event Description: THE REPORTER INDICATED THAT THE SURGEON IMPLANTED A VICM6; -12.00 DIOPTER IMPLANTABLE COLLAMER LENS INTO THE PATIENT'S LEFT EYE (OS) ON (B)(6) 2021. IT WAS INDICATED THAT THE PATIENT HAD RESIDUAL REFRACTION AFTER IMPLANTATION. LASIK SURGERY WAS PERFORMED INITIALLY ON (B)(6) 2022 AND A LASIK REVISION ON (B)(6) 2022. LENS REMAINS IMPLANTED. IF ADDITIONAL INFORMATION IS RECEIVED A…	Lens Retention + Secondary Operation	Unknown
https://www.accessdata.fda.gov/scripts/cdrh/cfdocs/cfMAUDE/Detail.CFM?MDRFOI__ID=15801769&pc=MTA	2023826-2022-04131	NA	Injury	STAAR SURGICAL COMPANY	2022-11-15 05:00:00	MTA	IMPLANTABLE COLLAMER LENS (ICL)	Misfocusing	Blurred Vision	P030016	NA	1	Event Description: THE REPORTER INDICATED THAT THE SURGEON IMPLANTED A VICM6; -7.00 DIOPTER IMPLANTABLE COLLAMER LENS INTO THE PATIENT'S LEFT EYE (OS) ON (B)(6) 2021. IT WAS INDICATED THAT THE PATIENT HAD RESIDUAL REFRACTION AFTER IMPLANTATION. LASIK SURGERY WAS PERFORMED INITIALLY ON 12-JUL-2022 AND A LASIK REVISION ON (B)(6) 2022. LENS REMAINS IMPLANTED. IF ADDITIONAL INFORMATION IS RECEIVED A …	Lens Retention + Secondary Operation	Unknown
https://www.accessdata.fda.gov/scripts/cdrh/cfdocs/cfMAUDE/Detail.CFM?MDRFOI__ID=15801803&pc=MTA	2023826-2022-04130	NA	Injury	STAAR SURGICAL COMPANY	2022-11-15 05:00:00	MTA	IMPLANTABLE COLLAMER LENS (ICL)	Misfocusing	Blurred Vision	P030016	NA	1	Event Description: THE REPORTER INDICATED THAT THE SURGEON IMPLANTED A 12.6MM VICM6; -8.00 DIOPTER IMPLANTABLE COLLAMER LENS INTO THE PATIENT'S RIGHT EYE (OD) ON (B)(6) 2021. IT WAS INDICATED THAT THE PATIENT HAD RESIDUAL REFRACTION AFTER IMPLANTATION. LASIK SURGERY WAS PERFORMED INITIALLY ON (B)(6) 2022 AND A LASIK REVISION ON 27-JUL-2022. LENS REMAINS IMPLANTED. IF ADDITIONAL INFORMATION IS REC…	Lens Retention + Secondary Operation	Unknown
https://www.accessdata.fda.gov/scripts/cdrh/cfdocs/cfMAUDE/Detail.CFM?MDRFOI__ID=15801953&pc=MTA	2023826-2022-04132	NA	Injury	STAAR SURGICAL COMPANY	2022-11-15 05:00:00	MTA	IMPLANTABLE COLLAMER LENS (ICL)	Misfocusing	Blurred Vision	P030016	NA	1	Event Description: THE REPORTER INDICATED THAT THE SURGEON IMPLANTED A VICM6; -6.00 DIOPTER IMPLANTABLE COLLAMER LENS INTO THE PATIENT'S LEFT EYE (OS) ON (B)(6) 2024. IT WAS INDICATED THAT THE PATIENT HAD RESIDUAL REFRACTION AFTER IMPLANTATION. LASIK SURGERY WAS PERFORMED ON (B)(6)2022. LENS REMAINS IMPLANTED. IF ADDITIONAL INFORMATION IS RECEIVED A SUPPLEMENTAL MEDWATCH REPORT WILL BE SUBMITTED.…	Lens Retention + Secondary Operation	Unknown
https://www.accessdata.fda.gov/scripts/cdrh/cfdocs/cfMAUDE/Detail.CFM?MDRFOI__ID=15808829&pc=MTA	2023826-2022-04009	NA	Injury	STAAR SURGICAL COMPANY	2022-11-16 05:00:00	MTA	IMPLANTABLE COLLAMER LENS (ICL)	Misfocusing	Blurred Vision	P030016	NA	1	Event Description: THE REPORTER INDICATED THAT THE SURGEON IMPLANTED A 12.6MM OR 12.1MM VICM6 OF -7.0 DIOPTER IMPLANTABLE COLLAMER LENS INTO THE PATIENT'S RIGHT EYE (OD) ON (B)(6) 2021. IT WAS INDICATED THAT LASER VISION CORRECTION WAS PERFORMED ON (B)(6) 2022; DUE TO THE PATIENT HAVING RESIDUAL REFRACTION. LENS REMAINS IMPLANTED. Manufacturer Narrative: (B)(4).	Lens Retention + Secondary Operation	Unknown
https://www.accessdata.fda.gov/scripts/cdrh/cfdocs/cfMAUDE/Detail.CFM?MDRFOI__ID=15811139&pc=MTA	2023826-2022-04010	NA	Injury	STAAR SURGICAL COMPANY	2022-11-16 05:00:00	MTA	IMPLANTABLE COLLAMER LENS (ICL)	Misfocusing	Blurred Vision	P030016	NA	1	Event Description: THE REPORTER INDICATED THAT THE SURGEON IMPLANTED A 12.6MM OR 12.1MM VICM6 OF -5.0 DIOPTER IMPLANTABLE COLLAMER LENS INTO THE PATIENT'S LEFT EYE (OS) ON (B)(6) 2021. IT WAS INDICATED THAT LASER VISION CORRECTION WAS PERFORMED ON (B)(6) 2022; DUE TO THE PATIENT HAVING RESIDUAL REFRACTION. LENS REMAINS IMPLANTED. Manufacturer Narrative: (B)(4).	Lens Retention + Secondary Operation	Unknown
https://www.accessdata.fda.gov/scripts/cdrh/cfdocs/cfMAUDE/Detail.CFM?MDRFOI__ID=15831959&pc=MTA	2023826-2022-04018	NA	Injury	STAAR SURGICAL COMPANY	2022-11-20 05:00:00	MTA	IMPLANTABLE COLLAMER LENS (ICL)	Misfocusing	Blurred Vision	P030016	NA	1	Event Description: THE REPORTER INDICATED THAT A 12.1MM VICM5 12.1 IMPLANTABLE COLLAMER LENS OF -4.50 DIOPTER WAS IMPLANTED INTO THE PATIENTS RIGHT EYE (OD) ON (B)(6) 2022. REFRACTIVE SURPRISE WAS OBSERVED AND INCREASES OF CYL. THE LENS REMAINS IMPLANTED. CAUSE REPORTED AS DEVICE. Manufacturer Narrative: (B)(4). CLAIM#: (B)(4).	Lens Retention	Unknown
https://www.accessdata.fda.gov/scripts/cdrh/cfdocs/cfMAUDE/Detail.CFM?MDRFOI__ID=15834977&pc=MTA	2023826-2022-03242	NA	Injury	STAAR SURGICAL COMPANY	2022-11-21 05:00:00	MTA	IMPLANTABLE COLLAMER LENS (ICL)	Misfocusing	Blurred Vision	P030016	NA	1	Event Description: IT WAS REPORTED THAT A 12.6 MM VICM612.6, -15.0 DIOPTER IMPLANTABLE COLLAMER LENS WAS IMPLANTED INTO A PATIENT'S RIGHT EYE (OD) (B)(6) 2021. ON (B)(6) 2021, LVC WAS PERFORMED DUE TO RESIDUAL REFRACTION AND POOR UDVA. Manufacturer Narrative: UNK. WORK ORDER SEARCH FOUND NO SIMILAR COMPLAINTS. CLAIM# (B)(4).	Lens Retention	Unknown
https://www.accessdata.fda.gov/scripts/cdrh/cfdocs/cfMAUDE/Detail.CFM?MDRFOI__ID=15835000&pc=MTA	2023826-2022-03243	NA	Injury	STAAR SURGICAL COMPANY	2022-11-21 05:00:00	MTA	IMPLANTABLE COLLAMER LENS (ICL)	Misfocusing	Blurred Vision	P030016	NA	1	Event Description: IT WAS REPORTED THAT A 12.6MM VICM612.6, -16.0 DIOPTER IMPLANTABLE COLLAMER LENS WAS IMPLANTED INTO A PATIENT'S LEFT EYE (OS) (B)(6) 2021. ON (B)(6) 2021, LVC WAS PERFORMED DUE TO RESIDUAL REFRACTION AND POOR UDVA. Manufacturer Narrative: WORK ORDER SEARCH FOUND NO SIMILAR COMPLAINTS. CLAIM# (B)(4).	Lens Retention	Unknown
https://www.accessdata.fda.gov/scripts/cdrh/cfdocs/cfMAUDE/Detail.CFM?MDRFOI__ID=15946952&pc=MTA	2023826-2022-04449	NA	Injury	STAAR SURGICAL COMPANY	2022-12-08 05:00:00	MTA	IMPLANTABLE COLLAMER LENS (ICL)	Misfocusing	Blurred Vision	P030016	NA	1	Event Description: THE REPORTER INDICATED THAT A 12.6MM VICM512.6 IMPLANTABLE COLLAMER LENS OF -7.5 DIOPTER WAS IMPLANTED IN THE PATIENT'S EYE ON (B)(6) 2022. REFRACTIVE SURPRISE WAS OBSERVED. Manufacturer Narrative: ADDITIONAL INFORMATION: B5: THE REPORTER INDICATED THAT A 12.6MM VICM512.6 IMPLANTABLE COLLAMER LENS OF -7.5 DIOPTER WAS IMPLANTED IN THE PATIENT'S EYE ON (B)(6) 2022. REFRACTIVE SUR…	Lens Extraction	Not_Resolved
https://www.accessdata.fda.gov/scripts/cdrh/cfdocs/cfMAUDE/Detail.CFM?MDRFOI__ID=16517890&pc=MTA	2023826-2023-00844	NA	Injury	STAAR SURGICAL COMPANY	2023-03-09 05:00:00	MTA	IMPLANTABLE COLLAMER LENS (ICL)	Misfocusing	Blurred Vision	P030016	NA	1	Event Description: THE REPORTER INDICATED THAT THE SURGEON IMPLANTED A 12.6MM VICM6_12.6; -6.0 DIOPTER IMPLANTABLE COLLAMER LENS INTO THE PATIENT'S LEFT EYE (OS). THE SURGEON REPORTS THAT THERE WAS AN UNDESIRED REFRACTIVE OUTCOME. LENS REMAINS IMPLANTED. ATTEMPTS TO OBTAIN ADDITIONAL INFORMATION HAVE NOT BEEN SUCCESSFUL. IF ADDITIONAL INFORMATION IS RECEIVED A SUPPLEMENTAL MEDWATCH REPORT WILL BE…	Lens Exchange	Not_Resolved
https://www.accessdata.fda.gov/scripts/cdrh/cfdocs/cfMAUDE/Detail.CFM?MDRFOI__ID=16517916&pc=MTA	2023826-2023-00843	NA	Injury	STAAR SURGICAL COMPANY	2023-03-09 05:00:00	MTA	IMPLANTABLE COLLAMER LENS (ICL)	Misfocusing	Blurred Vision	P030016	NA	1	Event Description: THE REPORTER INDICATED THAT THE SURGEON IMPLANTED A 12.6MM VICM6_12.6; -7.0 DIOPTER IMPLANTABLE COLLAMER LENS INTO THE PATIENT'S RIGHT EYE (OD). THE SURGEON REPORTS THAT THERE WAS AN UNDESIRED REFRACTIVE OUTCOME. LENS REMAINS IMPLANTED. ATTEMPTS TO OBTAIN ADDITIONAL INFORMATION HAVE NOT BEEN SUCCESSFUL. IF ADDITIONAL INFORMATION IS RECEIVED A SUPPLEMENTAL MEDWATCH REPORT WILL B…	Lens Exchange	Not_Resolved
https://www.accessdata.fda.gov/scripts/cdrh/cfdocs/cfMAUDE/Detail.CFM?MDRFOI__ID=17607594&pc=MTA	2023826-2023-03630	NA	Injury	STAAR SURGICAL COMPANY	2023-08-23 04:00:00	MTA	IMPLANTABLE COLLAMER LENS (ICL)	Misfocusing	Blurred Vision	P030016	NA	1	Event Description: THE REPORTER INDICATED THAT A 13.2MM VICM513.2 IMPLANTABLE COLLAMER LENS OF -4.5 DIOPTER WAS IMPLANTED AS A REPLACEMENT INTO THE PATIENT'S LEFT EYE (OS) ON (B)(6) 2023, DUE TO LENS ROTATION NOT ASSOCIATED TO LOW VAULT. THE PROBLEM WAS NOT RESOLVED. REPORTEDLY, "BLURRED VISION DUE TO RESIDUAL ASTIGMATISM. SUBJECTIVE REFRACTION AT FINAL VISIT. +0-1.00X130." Manufacturer Narrative…	Lens Exchange	Not_Resolved
https://www.accessdata.fda.gov/scripts/cdrh/cfdocs/cfMAUDE/Detail.CFM?MDRFOI__ID=18187772&pc=MTA	2023826-2023-04974	NA	Malfunction	STAAR SURGICAL COMPANY	2023-11-21 05:00:00	MTA	IMPLANTABLE COLLAMER LENS (ICL)	Misfocusing	Blurred Vision	P030016	NA	1	Event Description: THE REPORTER INDICATED THAT A 12.6MM VICM5 12.6 IMPLANTABLE COLLAMER LENS OF -6.00 DIOPTER WAS IMPLANTED INTO THE PATIENT'S EYE ON AN UNKNOWN DATE. RESIDUAL REFRACTIVE ERROR IS REPORTED. THE LENS REMAINS IMPLANTED. NO FURTHER INFORMATION HAS BEEN PROVIDED. IF ADDITIONAL INFORMATION IS RECEIVED A SUPPLEMENTAL MEDWATCH REPORT WILL BE SUBMITTED. Manufacturer Narrative: H6-INVESTIG…	Lens Retention	Unknown
https://www.accessdata.fda.gov/scripts/cdrh/cfdocs/cfMAUDE/Detail.CFM?MDRFOI__ID=18421048&pc=MTA	2023826-2023-05810	NA	Injury	STAAR SURGICAL COMPANY	2023-12-29 05:00:00	MTA	IMPLANTABLE COLLAMER LENS (ICL)	Misfocusing	Blurred Vision	P030016	NA	1	Event Description: THE REPORTER INDICATED THAT ON A 13.2MM VICM513.2 IMPLANTABLE COLLAMER LENS OF A -12.5 WAS IMPLANTED AS A REPLACEMENT INTO THE PATIENT'S RIGHT EYE (OD) ON (B)(6) 2023. ON (B)(6) 2023, THE LENS WAS EXCHANGED FOR A TORIC LENS DUE TO REFRACTIVE SURPRISE. THE PROBLEM WAS RESOLVED. THE CAUSE OF THE EVENT IS UNKNOWN. Manufacturer Narrative: A4-A6:UNK. H6: WORK ORDER SEARCH: NO SIMILA…	Lens Exchange	Resolved
https://www.accessdata.fda.gov/scripts/cdrh/cfdocs/cfMAUDE/Detail.CFM?MDRFOI__ID=8656495&pc=MTA	2023826-2019-00942	NA	Malfunction	STAAR SURGICAL COMPANY AG	2019-05-30	MTA	IMPLANTABLE COLLAMER LENS (ICL)	Misfocusing	Blurred Vision	NA	NA	1	Event Description: THE REPORTER INDICATED THE SURGEON IMPLANTED A 12.0MM ICM120V4 IMPLANTABLE COLLAMER LENS, -14.0 DIOPTER, IN THE PATIENTS LEFT EYE (OS), BACK IN 2003/2004. THE PATIENT WAS EXPERIENCING REFRACTIVE CHANGE OVER TIME AND THE SURGEON WAS PLANNING TO EXPLANT AND EXCHANGE THE LENS. BUT THE SURGEON CHANGED HIS MIND AND DECIDED TO MONITOR THE PATIENT. THE LENS REMAINS IMPLANTED. Manufact…	Lens Retention	Unknown
https://www.accessdata.fda.gov/scripts/cdrh/cfdocs/cfMAUDE/Detail.CFM?MDRFOI__ID=8656503&pc=MTA	2023826-2019-00943	NA	Malfunction	STAAR SURGICAL COMPANY AG	2019-05-30	MTA	IMPLANTABLE COLLAMER LENS (ICL)	Misfocusing	Blurred Vision	NA	NA	1	Event Description: THE REPORTER INDICATED THE SURGEON IMPLANTED A 12.0MM ICM120V4 IMPLANTABLE COLLAMER LENS, -14.5 DIOPTER, IN THE PATIENTS RIGHT EYE (OD), BACK IN 2003/2004. THE PATIENT WAS EXPERIENCING REFRACTIVE CHANGE OVER TIME AND THE SURGEON WAS PLANNING TO EXPLANT AND EXCHANGE THE LENS. BUT THE SURGEON CHANGED HIS MIND AND DECIDED TO MONITOR THE PATIENT. THE LENS REMAINS IMPLANTED. Manufac…	Lens Retention	Unknown
https://www.accessdata.fda.gov/scripts/cdrh/cfdocs/cfMAUDE/Detail.CFM?MDRFOI__ID=14713784&pc=MTA	2023826-2022-01864	2022-05-16	Injury	STAAR SURGICAL COMPANY	2022-06-16	MTA	IMPLANTABLE COLLAMER LENS (ICL)	Misfocusing; Adverse Event Without Identified Device or Use Problem	Blurred Vision	P030016	NA	1	Event Description: THE REPORTER INDICATED THAT A 12.6MM VICM5_12.6 IMPLANTABLE COLLAMER LENS OF -2.25 DIOPTER WAS IMPLANTED INTO THE PATIENT'S RIGHT EYE (OD) IN 2021. THE PATIENT EXPERIENCED REFRACTIVE CHANGE OVERTIME, LENS REMAINS IMPLANTED. IN THE REPORTERS OPINION THE CAUSE OF THIS EVENT IS UNKNOWN. IF ADDITIONAL INFORMATION IS RECEIVED A SUPPLEMENTAL MEDWATCH REPORT WILL BE SUBMITTED. Manufac…	Lens Exchange	Resolved
https://www.accessdata.fda.gov/scripts/cdrh/cfdocs/cfMAUDE/Detail.CFM?MDRFOI__ID=14714037&pc=MTA	2023826-2022-01865	2022-05-16	Injury	STAAR SURGICAL COMPANY	2022-06-16	MTA	IMPLANTABLE COLLAMER LENS (ICL)	Misfocusing; Adverse Event Without Identified Device or Use Problem	Blurred Vision	P030016	NA	1	Event Description: THE REPORTER INDICATED THAT A 12.6MM VICM5_12.6 IMPLANTABLE COLLAMER LENS OF -2.25 DIOPTER WAS IMPLANTED INTO THE PATIENT'S LEFT EYE (OS) IN 2021. THE PATIENT EXPERIENCED REFRACTIVE CHANGE OVERTIME, LENS REMAINS IMPLANTED. IN THE REPORTERS OPINION THE CAUSE OF THIS EVENT IS UNKNOWN. IF ADDITIONAL INFORMATION IS RECEIVED A SUPPLEMENTAL MEDWATCH REPORT WILL BE SUBMITTED. Manufact…	Lens Exchange	Resolved
https://www.accessdata.fda.gov/scripts/cdrh/cfdocs/cfMAUDE/Detail.CFM?MDRFOI__ID=15557432&pc=MTA	2023826-2022-03451	2022-09-06	Injury	STAAR SURGICAL COMPANY	2022-10-06	MTA	IMPLANTABLE COLLAMER LENS (ICL)	Misfocusing; Adverse Event Without Identified Device or Use Problem	Blurred Vision	NA	NA	1	Event Description: THE REPORTER INDICATED THAT THE SURGEON OBSERVED REFRACTIVE CHANGE OVER TIME IN THE PATIENT'S RIGHT EYE (OD). Manufacturer Narrative: B5: THE REPORTER INDICATED THAT THE SURGEON IMPLANTED A 13.2MM VICM513.2 IMPLANTABLE COLLAMER LENS OF A -9.5 DIOPTER, WAS IMPLANTED INTO THE RIGHT EYE (OD) OF A PATIENT ON (B)(6) 2018. ON (B)(6) 2022, REFRACTIVE CHANGE OVER TIME WAS OBSERVED. CAU…	Lens Exchange	Resolved
https://www.accessdata.fda.gov/scripts/cdrh/cfdocs/cfMAUDE/Detail.CFM?MDRFOI__ID=8941306&pc=MTA	2023826-2019-01580	2019-05-21	Malfunction	STAAR SURGICAL COMPANY	2019-08-28	MTA	IMPLANTABLE COLLAMER LENS	Misfocusing; Inadequacy of Device Shape and/or Size	Blurred Vision	NA	NA	1	Event Description: THE REPORTER INDICATED THAT THE SURGEON IMPLANTED A 12.6MM VICM5_12.6 IMPLANTABLE COLLAMER LENS, -6.5 DIOPTER INTO THE PATIENT'S LEFT EYE (OS) ON (B)(6) 2019. THE SURGEON REPORTS LOW VAULT AND REFRACTIVE SURPRISE. THE CAUSE OF THE EVENT IS REPORTED AS UNKNOWN. REPORTEDLY, THE LENS REMAINS IMPLANTED. Manufacturer Narrative: WEIGHT, ETHNICITY, RACE: UNK. PRODUCT IS MANUFACTURED B…	Lens Retention	Unknown
https://www.accessdata.fda.gov/scripts/cdrh/cfdocs/cfMAUDE/Detail.CFM?MDRFOI__ID=8941316&pc=MTA	2023826-2019-01579	2019-05-21	Malfunction	STAAR SURGICAL COMPANY	2019-08-28	MTA	IMPLANTABLE COLLAMER LENS	Misfocusing; Inadequacy of Device Shape and/or Size	Blurred Vision	NA	NA	1	Event Description: THE REPORTER INDICATED THAT THE SURGEON IMPLANTED A 12.6MM VICM5_12.6 IMPLANTABLE COLLAMER LENS, -7.0 DIOPTER INTO THE PATIENT'S RIGHT EYE (OD) ON (B)(6) 2019. THE SURGEON REPORTS LOW VAULT AND REFRACTIVE SURPRISE. THE CAUSE OF THE EVENT IS REPORTED AS UNKNOWN. REPORTEDLY, THE LENS REMAINS IMPLANTED. Manufacturer Narrative: PRODUCT IS MANUFACTURED BUT NOT SOLD IN THE U.S. NO SI…	Lens Retention	Unknown
https://www.accessdata.fda.gov/scripts/cdrh/cfdocs/cfMAUDE/Detail.CFM?MDRFOI__ID=8932874&pc=MTA	2023826-2019-01548	2019-07-17	Malfunction	STAAR SURGICAL COMPANY	2019-08-26	MTA	IMPLANTABLE COLLAMER LENS (ICL)	Misfocusing; Inadequacy of Device Shape and/or Size	Blurred Vision	NA	NA	1	Event Description: THE REPORTER INDICATED THE SURGEON IMPLANTED A 13.2MM VICM5_13.2 IMPLANTABLE COLLAMER LENS, -03.00 DIOPTER, IN THE PATIENTS LEFT EYE (OS) ON (B)(6) 2019. THREE MONTHS LATER, THE PATIENT IS NOT SATISFIED WITH HIS VISUAL ACUITY AND COMPLAINS OF BLURRED VISION. THE LENS HAS LOW VAULTING AND REMAINS IMPLANTED. THE CAUSE OF THE EVENT IS PATIENT RELATED FACTOR. ADDITIONAL INFORMATION…	Lens Retention	Unknown
https://www.accessdata.fda.gov/scripts/cdrh/cfdocs/cfMAUDE/Detail.CFM?MDRFOI__ID=10744678&pc=MTA	2023826-2020-02533	2020-08-20	Injury	STAAR SURGICAL COMPANY	2020-10-27	MTA	IMPLANTABLE COLLAMER LENS (ICL)	Misfocusing; Inadequacy of Device Shape and/or Size	Blurred Vision	NA	NA	1	Event Description: THE REPORTER INDICATED THAT A 12.6MM, VICM5_12.6, -10.00 DIOPTER, IMPLANTABLE COLLAMER LENS WAS IMPLANTED INTO THE PATIENTS RIGHT EYE (OD) ON (B)(6) 2020. ON (B)(6) 2020 THE LENS WAS EXCHANGED FOR A SHORTER LENGTH AND DIFFERENT DIOPTER LENS DUE TO EXCESSIVE VAULT AND REFRACTIVE SURPRISE. THIS EXCHANGE RESOLVED THE PROBLEM. Manufacturer Narrative: H3- DEVICE EVALUATION: LENS WAS…	Lens Exchange	Resolved
https://www.accessdata.fda.gov/scripts/cdrh/cfdocs/cfMAUDE/Detail.CFM?MDRFOI__ID=10856354&pc=MTA	2023826-2020-02692	2020-09-23	Injury	STAAR SURGICAL COMPANY	2020-11-17	MTA	IMPLANTABLE COLLAMER LENS (ICL)	Misfocusing; Inadequacy of Device Shape and/or Size	Blurred Vision	N/A	NA	1	Event Description: THE REPORTER INDICATED THAT THE SURGEON IMPLANTED A 13.2MM VICM5_13.2 IMPLANTABLE COLLAMER LENS, -13.5 DIOPTER INTO THE PATIENT'S LEFT EYE (OS) ON (B)(6) 2020. ON (B)(6) 2020 THE LENS WAS EXCHANGED WITH A SHORTER LENS, THE SURGEON REPORTING EXCESSIVE VAULT, REFRACTIVE SURPRISE, AND PERMANENT LOSS OF BCVA. THE PROBLEM WAS RESOLVED. THE CAUSE OF THE EVENT IS REPORTED AS OTHER: "1…	Lens Exchange	Resolved
https://www.accessdata.fda.gov/scripts/cdrh/cfdocs/cfMAUDE/Detail.CFM?MDRFOI__ID=11343188&pc=MTA	2023826-2021-00400	2021-01-14	Injury	STAAR SURGICAL COMPANY	2021-02-18	MTA	IMPLANTABLE COLLAMER LENS (ICL)	Misfocusing; Inadequacy of Device Shape and/or Size	Blurred Vision	N/A	NA	1	Event Description: THE REPORTER INDICATED THAT A 12.6MM, VICM5_12.6, -10.00 DIOPTER, IMPLANTABLE COLLAMER LENS WAS IMPLANTED INTO THE PATIENT'S LEFT EYE (OS) ON (B)(6) 2021. LENS WAS EXPLANTED ON (B)(6) 2021 DUE TO REFRACTIVE SURPRISE AND EXCESSIVE VAULT. REPORTEDLY, "ADDITIAONAL REFRACTION INCLUDING CR WILL BE MEASURED. THEN, THE SURGEON WILL CONSIDER A REPLACEMENT SURGERY." ADDITIONAL INFORMATI…	Lens Extraction	Unknown
https://www.accessdata.fda.gov/scripts/cdrh/cfdocs/cfMAUDE/Detail.CFM?MDRFOI__ID=11343198&pc=MTA	2023826-2021-00399	2021-01-14	Injury	STAAR SURGICAL COMPANY	2021-02-18	MTA	IMPLANTABLE COLLAMER LENS (ICL)	Misfocusing; Inadequacy of Device Shape and/or Size	Blurred Vision	N/A	NA	1	Event Description: THE REPORTER INDICATED THAT A 12.6MM, VICM5_12.6, -11.50 DIOPTER, IMPLANTABLE COLLAMER LENS WAS IMPLANTED INTO THE PATIENT'S RIGHT EYE (OD) ON (B)(6) 2021. LENS WAS EXPLANTED ON (B)(6)2021 DUE TO REFRACTIVE SURPRISE AND EXCESSIVE VAULT. REPORTEDLY, "ADDITIAONAL REFRACTION INCLUDING CR WILL BE MEASURED. THEN, THE SURGEON WILL CONSIDER A REPLACEMENT SURGERY." ADDITIONAL INFORMATI…	Lens Extraction	Unknown
https://www.accessdata.fda.gov/scripts/cdrh/cfdocs/cfMAUDE/Detail.CFM?MDRFOI__ID=12214206&pc=MTA	2023826-2021-02660	2021-06-29	Injury	STAAR SURGICAL COMPANY	2021-07-22	MTA	IMPLANTABLE COLLAMER LENS (ICL)	Misfocusing; Inadequacy of Device Shape and/or Size	Blurred Vision	N/A	NA	1	Event Description: THE REPORTER INDICATED THAT THE SURGEON IMPLANTED A 13.2MM VICM613.2, -06.50 DIOPTER, IMPLANTABLE COLLAMER LENS INTO THE PATIENT'S RIGHT EYE (OD) ON (B)(6) 2021 . THE LENS WAS REPLACED WITH A SHORTER LENGTH LENS DUE TO REFRACTIVE SURPRISE AND EXCESSIVE VAULT ON (B)(6) 2021. REPORTEDLY, VAULT IS OK NOW AND PATIENT IS MORE HAPPY WITH DISTANCE AND NEAR VISION. PATIENT UNDER OBSERV…	Lens Exchange	Resolved
https://www.accessdata.fda.gov/scripts/cdrh/cfdocs/cfMAUDE/Detail.CFM?MDRFOI__ID=12214232&pc=MTA	2023826-2021-02659	2021-06-29	Injury	STAAR SURGICAL COMPANY	2021-07-22	MTA	IMPLANTABLE COLLAMER LENS (ICL)	Misfocusing; Inadequacy of Device Shape and/or Size	Blurred Vision	N/A	NA	1	Event Description: THE REPORTER INDICATED THAT THE SURGEON IMPLANTED A 13.2MM VICM613.2, -06.00 DIOPTER, IMPLANTABLE COLLAMER LENS INTO THE PATIENT'S RIGHT EYE (OD) ON (B)(6) 2021. THE LENS WAS REPLACED WITH A SHORTER LENGTH LENS DUE TO REFRACTIVE SURPRISE AND EXCESSIVE VAULT ON (B)(6) 2021. REPORTEDLY, VAULT IS OK NOW AND PATIENT IS MORE HAPPY WITH DISTANCE AND NEAR VISION. PATIENT UNDER OBSERVA…	Lens Exchange	Resolved
https://www.accessdata.fda.gov/scripts/cdrh/cfdocs/cfMAUDE/Detail.CFM?MDRFOI__ID=14220828&pc=MTA	2023826-2022-01102	2022-02-01	Injury	STAAR SURGICAL COMPANY	2022-04-27	MTA	IMPLANTABLE COLLAMER LENS (ICL)	Misfocusing; Inadequacy of Device Shape and/or Size	Blurred Vision	P030016	NA	1	Event Description: THE REPORTER INDICATED THAT A 13.7MM VICMO13.7 IMPLANTABLE COLLAMER LENS OF -13.00 DIOPTER WAS IMPLANTED INTO THE PATIENT'S LEFT EYE (OS) ON (B)(6) 2022. EXCESSIVE VAULT AND REFRACTIVE SURPRISE WERE REPORTED. LENS REMAINS IMPLANTED. CAUSE IS REPORTED AS USER ERROR - ICL 13.7 INSTEAD OF 12.6. Manufacturer Narrative: WEIGHT:UNKNOWN, ETHINICITY:UNKNOWN,RACE:UNKNOWN. THIS PRODUCT I…	Lens Exchange	Resolved
https://www.accessdata.fda.gov/scripts/cdrh/cfdocs/cfMAUDE/Detail.CFM?MDRFOI__ID=14649879&pc=MTA	2023826-2022-01839	2022-02-13	Injury	STAAR SURGICAL COMPANY	2022-06-09	MTA	IMPLANTABLE COLLAMER LENS (ICL)	Misfocusing; Inadequacy of Device Shape and/or Size	Blurred Vision	P030016	NA	1	Event Description: THE REPORTER INDICATED THAT THE SURGEON IMPLANTED A 12.6MM VICMO12.6; -12.0 DIOPTER IMPLANTABLE COLLAMER LENS INTO THE PATIENT'S RIGHT EYE (OD) ON (B)(6) 2022. THE PATIENT EXPERIENCED LOW VAULTING AND REFRACTIVE SURPRISE. ON (B)(6) 2022 THE LENS WAS EXCHANGED WITH A LONGER LENGTH LENS AND DIFFERENT MODEL. THIS RESOLVED THE PROBLEM. IT WAS ALSO NOTED "THE PATIENT'S RIGHT EYE HAD…	Lens Exchange	Resolved
https://www.accessdata.fda.gov/scripts/cdrh/cfdocs/cfMAUDE/Detail.CFM?MDRFOI__ID=14862479&pc=MTA	2023826-2022-01906	2022-05-31	Injury	STAAR SURGICAL COMPANY	2022-06-29	MTA	IMPLANTABLE COLLAMER LENS (ICL)	Misfocusing; Inadequacy of Device Shape and/or Size	Blurred Vision	P030016	NA	1	Event Description: THE REPORTER INDICATED THAT A 12.6MM VICM5_12.6 IMPLANTABLE COLLAMER LENS OF -8.5 DIOPTER WAS IMPLANTED INTO THE PATIENT'S RIGHT EYE (OD) ON (B)(6) 2021. REFRACTIVE SURPRISE REPORTED. REPORTEDLY RESIDUAL ASTIGMATISM WAS CORRECTED BY INCISION. THE LENS REMAINS IMPLANTED. Manufacturer Narrative: B5 - "ON (B)(6) 2022 THE LENS WAS EXCHANGED FOR A SAME MODEL/LONGER LENGTH LENS DUE T…	Lens Exchange	Resolved
https://www.accessdata.fda.gov/scripts/cdrh/cfdocs/cfMAUDE/Detail.CFM?MDRFOI__ID=16109368&pc=MTA	2023826-2023-00085	2022-08-04	Injury	STAAR SURGICAL COMPANY	2023-01-05	MTA	IMPLANTABLE COLLAMER LENS (ICL)	Misfocusing; Inadequacy of Device Shape and/or Size	Blurred Vision	P030016	NA	1	Event Description: THE REPORTER INDICATED THAT THE SURGEON IMPLANTED A 12.6MM VICMO12.6; -4.0 DIOPTER IMPLANTABLE COLLAMER LENS INTO THE PATIENT'S RIGHT EYE (OD) ON (B)(6) 2016. THE PATIENT EXPERIENCED LOW VAULTING AND REFRACTIVE CHANGE OVER TIME. LENS REMAINS IMPLANTED. CAUSE OF THE EVENT WAS REPORTED AS UNKNOWN. Manufacturer Narrative: ADDITIONAL INFORMATION: B5: ON (B)(6) 2023 THE LENS WAS REP…	Lens Exchange	Resolved
https://www.accessdata.fda.gov/scripts/cdrh/cfdocs/cfMAUDE/Detail.CFM?MDRFOI__ID=16109425&pc=MTA	2023826-2023-00086	2022-08-04	Injury	STAAR SURGICAL COMPANY	2023-01-05	MTA	IMPLANTABLE COLLAMER LENS (ICL)	Misfocusing; Inadequacy of Device Shape and/or Size	Blurred Vision	P030016	NA	1	Event Description: THE REPORTER INDICATED THAT THE SURGEON IMPLANTED A 12.6MM VICMO12.6; -4.50 DIOPTER IMPLANTABLE COLLAMER LENS INTO THE PATIENT'S LEFT EYE (OS) ON (B)(6) 2016. THE PATIENT EXPERIENCED LOW VAULTING AND REFRACTIVE CHANGE OVER TIME. LENS REMAINS IMPLANTED. CAUSE OF THE EVENT WAS REPORTED AS UNKNOWN. Manufacturer Narrative: ADDITIONAL INFORMATION: B5: ON (B)(6) 2023 THE LENS WAS REP…	Lens Exchange	Resolved
https://www.accessdata.fda.gov/scripts/cdrh/cfdocs/cfMAUDE/Detail.CFM?MDRFOI__ID=15588754&pc=MTA	2023826-2022-03592	2022-09-06	Injury	STAAR SURGICAL COMPANY	2022-10-12	MTA	IMPLANTABLE COLLAMER LENS (ICL)	Misfocusing; Inadequacy of Device Shape and/or Size	Blurred Vision	P030016	NA	1	Event Description: THE REPORTER INDICATED THAT AN IMPLANTABLE COLLAMER LENS WAS IMPLANTED INTO THE PATIENTS EYE AND THE PATIENT EXPERIENCED EXCESSIVE VAULT AND REFRACTIVE SURPRISE, LENS REMAINS IMPLANTED. ADDITIONAL INFORMATION HAS BEEN REQUESTED BUT NONE HAS BEEN FORTHCOMING. IF ADDITIONAL INFORMATION IS RECEIVED A SUPPLEMENTAL MEDWATCH REPORT WILL BE SUBMITTED. Manufacturer Narrative: DATE OF E…	Lens Exchange	Resolved
https://www.accessdata.fda.gov/scripts/cdrh/cfdocs/cfMAUDE/Detail.CFM?MDRFOI__ID=15588810&pc=MTA	2023826-2022-03593	2022-09-06	Injury	STAAR SURGICAL COMPANY	2022-10-12	MTA	IMPLANTABLE COLLAMER LENS (ICL)	Misfocusing; Inadequacy of Device Shape and/or Size	Blurred Vision	P030016	NA	1	Event Description: THE REPORTER INDICATED THAT AN IMPLANTABLE COLLAMER LENS WAS IMPLANTED INTO THE PATIENTS EYE AND THE PATIENT EXPERIENCED EXCESSIVE VAULT AND REFRACTIVE SURPRISE, LENS REMAINS IMPLANTED. ADDITIONAL INFORMATION HAS BEEN REQUESTED BUT NONE HAS BEEN FORTHCOMING. IF ADDITIONAL INFORMATION IS RECEIVED A SUPPLEMENTAL MEDWATCH REPORT WILL BE SUBMITTED. Manufacturer Narrative: B5: THE R…	Lens Exchange	Resolved
https://www.accessdata.fda.gov/scripts/cdrh/cfdocs/cfMAUDE/Detail.CFM?MDRFOI__ID=15810735&pc=MTA	2023826-2022-04175	2022-10-10	Injury	STAAR SURGICAL COMPANY	2022-11-16	MTA	IMPLANTABLE COLLAMER LENS (ICL)	Misfocusing; Inadequacy of Device Shape and/or Size	Blurred Vision	P030016	NA	1	Event Description: THE REPORTER INDICATED THAT THE SURGEON IMPLANTED A 12.6MM VICM5_12.6; -03.50 DIOPTER IMPLANTALE COLLAMER LENS INTO THE PATIENT'S RIGHT EYE (OD) ON (B)(6) 2022. THE PATIENT EXPERIENCED LOW VAULTING AND REFRACTIVE SURPRISE. ON (B)(6) 2022 THE LENS WAS EXCHANGED WITH A LONGER LENGTH LENS BUT THE PROBLEM WAS NOT RESOLVED. SEE MFR# 2023826-2022-04176 FOR REPLACEMENT LENS CLAIM. Man…	Lens Exchange	Not_Resolved
https://www.accessdata.fda.gov/scripts/cdrh/cfdocs/cfMAUDE/Detail.CFM?MDRFOI__ID=15811248&pc=MTA	2023826-2022-04177	2022-10-25	Injury	STAAR SURGICAL COMPANY	2022-11-16	MTA	IMPLANTABLE COLLAMER LENS (ICL)	Misfocusing; Inadequacy of Device Shape and/or Size	Blurred Vision	P030016	NA	1	Event Description: THE REPORTER INDICATED THAT THE SURGEON IMPLANTED A 13.7MM VICM5_13.7; -12.00 DIOPTER IMPLANTABLE COLLAMER LENS INTO THE PATIENT'S RIGHT EYE (OD) ON (B)(6) 2018. THE PATIENT NOW HAS EXPERIENCED LOW VAULTING AND REFRACTIVE CHANGE OVER TIME. LENS REMAINS IMPLANTED. CAUSE OF THE EVENT WAS REPORTED AS UNKNOWN. IF ADDITIONAL INFORMATION IS RECEIVED A SUPPLEMENTAL MEDWATCH REPORT WIL…	Lens Exchange	Resolved
https://www.accessdata.fda.gov/scripts/cdrh/cfdocs/cfMAUDE/Detail.CFM?MDRFOI__ID=16865570&pc=MTA	2023826-2023-01628	2023-02-04	Injury	STAAR SURGICAL COMPANY	2023-05-03	MTA	IMPLANTABLE COLLAMER LENS (ICL)	Misfocusing; Inadequacy of Device Shape and/or Size	Blurred Vision	P030016	NA	1	Event Description: THE REPORTER INDICATED THAT A 12.6MM VICM512.6 IMPLANTABLE COLLAMER LENS OF A -12.0 DIOPTER WAS IMPLANTED INTO THE PATIENT'S RIGHT EYE (OD) ON (B)(6) 2022. ON (B)(6) 2023, THE LENS WAS EXCHANGED FOR A SHORTER LENGTH LENS DUE TO REFRACTIVE SURPRISE AND EXCESSIVE VAULT. THE PROBLEM WAS RESOLVED. THE CAUSE OF THE EVENT IS UNKNOWN. Manufacturer Narrative: H3: DEVICE EVALUATION - LE…	Lens Exchange	Resolved
https://www.accessdata.fda.gov/scripts/cdrh/cfdocs/cfMAUDE/Detail.CFM?MDRFOI__ID=16865571&pc=MTA	2023826-2023-01627	2023-02-04	Injury	STAAR SURGICAL COMPANY	2023-05-03	MTA	IMPLANTABLE COLLAMER LENS (ICL)	Misfocusing; Inadequacy of Device Shape and/or Size	Blurred Vision	P030016	NA	1	Event Description: THE REPORTER INDICATED THAT A 12.6MM VICM512.6 IMPLANTABLE COLLAMER LENS OF A -12.0 DIOPTER WAS IMPLANTED INTO THE PATIENT'S LEFT EYE (OS) ON (B)(6) 2022. ON (B)(6) 2023, THE LENS WAS EXCHANGED FOR A SHORTER LENGTH LENS DUE TO REFRACTIVE SURPRISE AND EXCESSIVE VAULT. THE PROBLEM WAS RESOLVED. THE CAUSE OF THE EVENT IS UNKNOWN. Manufacturer Narrative: H6: WORK ORDER SEARCH FOUND…	Lens Exchange	Resolved
https://www.accessdata.fda.gov/scripts/cdrh/cfdocs/cfMAUDE/Detail.CFM?MDRFOI__ID=17193864&pc=MTA	2023826-2023-02529	2023-05-17	Injury	STAAR SURGICAL COMPANY	2023-06-23	MTA	IMPLANTABLE COLLAMER LENS (ICL)	Misfocusing; Inadequacy of Device Shape and/or Size	Blurred Vision	P030016	NA	1	Event Description: THE REPORTER INDICATED THAT A 13.7MM VICM5_13.7 IMPLANTABLE COLLAMER LENS OF -11.00 DIOPTER WAS IMPLANTED INTO THE PATIENT'S LEFT EYE (OS) ON (B)(6) 2023. ON (B)(6) 2023 THE LENS WAS EXCHANGED FOR A SHORTER LENGTH LENS OF DIFFERENT POWER DUE TO EXCESSIVE VAULT AND REFRACTIVE SURPRISE AND THE PROBLEM RESOLVED. CAUSE OF EVENT WAS UNKNOWN. Manufacturer Narrative: H3: DEVICE EVALUA…	Lens Exchange	Resolved
https://www.accessdata.fda.gov/scripts/cdrh/cfdocs/cfMAUDE/Detail.CFM?MDRFOI__ID=17302269&pc=MTA	2023826-2023-02759	2023-05-30	Injury	STAAR SURGICAL COMPANY	2023-07-11	MTA	IMPLANTABLE COLLAMER LENS (ICL)	Misfocusing; Inadequacy of Device Shape and/or Size	Blurred Vision	P030016	NA	1	Event Description: THE REPORTER INDICATED THAT A,12.6MM VICM512.6 IMPLANTABLE COLLAMER LENS OF -6.5 DIOPTER WAS IMPLANTED INTO THE PATIENT'S RIGHT EYE (OD) ON (B)(6) 2023. EXCESSIVE VAULT AND BIG PUPIL, PHOTOPHOBIA, AND BLURRED VISION WERE OBSERVED. REPORTEDLY, "NO CORRELATION BETWEEN WTW, SULCUS-SULCUS AND ICL SIZE." THE PROBLEM WAS NOT RESOLVED. THE REPORTER ALSO STATED, "PENDING EXCHANGE ICL."…	Lens Retention	Not_Resolved
https://www.accessdata.fda.gov/scripts/cdrh/cfdocs/cfMAUDE/Detail.CFM?MDRFOI__ID=17344449&pc=MTA	2023826-2023-02859	2023-06-24	Malfunction	STAAR SURGICAL COMPANY	2023-07-18	MTA	IMPLANTABLE COLLAMER LENS (ICL)	Misfocusing; Inadequacy of Device Shape and/or Size	Blurred Vision	P030016	NA	1	Event Description: THE REPORTER INDICATED THAT THE SURGEON IMPLANTED A 13.2MM VICM5 13.2, -13.00 DIOPTER, IMPLANTABLE COLLAMER LENS INTO THE PATIENT'S RIGHT EYE (OD) IN (B)(6) 2023. REFRACTIVE SURPRISE AND EXCESSIVE VAULT WERE OBSERVED. LENS REMAINS IMPLANTED. CAUSE OF THE EVENT IS REPORTED AS UNKNOWN. PROBLEM NOT RESOLVED. ADDITIONAL INFORMATION HAS BEEN REQUESTED BUT NONE HAS BEEN FORTHCOMING. …	Lens Retention	Not_Resolved
https://www.accessdata.fda.gov/scripts/cdrh/cfdocs/cfMAUDE/Detail.CFM?MDRFOI__ID=17344451&pc=MTA	2023826-2023-02860	2023-06-24	Malfunction	STAAR SURGICAL COMPANY	2023-07-18	MTA	IMPLANTABLE COLLAMER LENS (ICL)	Misfocusing; Inadequacy of Device Shape and/or Size	Blurred Vision	P030016	NA	1	Event Description: THE REPORTER INDICATED THAT THE SURGEON IMPLANTED A 13.2MM VICM5 13.2, -6.5 DIOPTER, IMPLANTABLE COLLAMER LENS INTO THE PATIENT'S LEFT EYE (OS) IN (B)(6) 2023. REFRACTIVE SURPRISE AND EXCESSIVE VAULT WERE OBSERVED. LENS REMAINS IMPLANTED. CAUSE OF THE EVENT IS REPORTED AS UNKNOWN. PROBLEM NOT RESOLVED. ADDITIONAL INFORMATION HAS BEEN REQUESTED BUT NONE HAS BEEN FORTHCOMING. Man…	Lens Retention	Not_Resolved
https://www.accessdata.fda.gov/scripts/cdrh/cfdocs/cfMAUDE/Detail.CFM?MDRFOI__ID=17591904&pc=MTA	2023826-2023-03631	2023-06-27	Injury	STAAR SURGICAL COMPANY	2023-08-21	MTA	IMPLANTABLE COLLAMER LENS (ICL)	Misfocusing; Inadequacy of Device Shape and/or Size	Blurred Vision	P030016	NA	1	Event Description: THE REPORTER INDICATED THAT THE SURGEON IMPLANTED A 12.6MM MICL12.6; -11.5 DIOPTER IMPLANTABLE COLLAMER LENS INTO THE PATIENT'S LEFT EYE (OS) ON (B)(6) 2015. IT WAS INDICATED THAT THE PATIENT EXPERIENCED REFRACTIVE CHANGE WHICH WAS ASSESSED ON (B)(6) 2023, THE PATIENT ALSO HAD LOW VAULTING WITH NO ROTATION. ON (B)(6) 2023 THE LENS WAS EXCHANGED WITH A LONGER LENGTH DIFFERENT PO…	Lens Exchange	Not_Resolved
https://www.accessdata.fda.gov/scripts/cdrh/cfdocs/cfMAUDE/Detail.CFM?MDRFOI__ID=18017240&pc=MTA	2023826-2023-04814	2023-07-31	Injury	STAAR SURGICAL COMPANY	2023-10-26	MTA	IMPLANTABLE COLLAMER LENS (ICL)	Misfocusing; Inadequacy of Device Shape and/or Size	Blurred Vision	P030016	NA	1	Event Description: THE REPORTER INDICATED THAT THE SURGEON IMPLANTED A 12.6MM VICMO12.6; -6.0 DIOPTER IMPLANTABLE COLLAMER LENS INTO THE PATIENT'S LEFT EYE (OS) ON (B)(6) 2023. THE PATIENT EXPERIENCED LOW VAULTING AND REFRACTIVE SURPRISE. ON (B)(6) 2023 THE LENS WAS EXCHANGED WITH A LONGER LENGTH DIFFERENT POWER LENS AND THIS RESOLVED THE PROBLEM. THE CAUSE OF THE EVENT WAS REPORTED AS UNKNOWN. M…	Lens Exchange	Resolved
https://www.accessdata.fda.gov/scripts/cdrh/cfdocs/cfMAUDE/Detail.CFM?MDRFOI__ID=17986858&pc=MTA	2023826-2023-04599	2023-09-02	Injury	STAAR SURGICAL COMPANY	2023-10-23	MTA	IMPLANTABLE COLLAMER LENS (ICL)	Misfocusing; Inadequacy of Device Shape and/or Size	Blurred Vision	P030016	NA	1	Event Description: THE REPORTER INDICATED THAT THE SURGEON IMPLANTED A 12.1MM VICM5 12.1, -9.0 DIOPTER, IMPLANTABLE COLLAMER LENS INTO THE PATIENT'S LEFT EYE (OS) ON (B)(6) 2023. THE LENS WAS REPLACED WITH A LONGER LENGTH DIFFERENT POWER LENS (SPHERE/CYLINDER/AXIS) DUE TO REFRACTIVE SURPRISE AND LOW VAULT ON (B)(6) 2023. THIS RESOLVED THE PROBLEM. CAUSE OF THE EVENT IS REPORTED AS UNKNOWN. Manufa…	Lens Exchange	Resolved
https://www.accessdata.fda.gov/scripts/cdrh/cfdocs/cfMAUDE/Detail.CFM?MDRFOI__ID=11375703&pc=MTA	2023826-2021-00501	NA	Malfunction	STAAR SUGICAL COMPANY	2021-02-24	MTA	IMPLANTABLE COLLAMER LENS (ICL)	Misfocusing; Inadequacy of Device Shape and/or Size	Blurred Vision	NA	NA	1	Event Description: THE REPORTER STATED THAT A 12.6MM, VICM5_12.6, -4.00 DIOPTER, IMPLANTABLE COLLAMER LENS WAS IMPLANTED IN (B)(6) 2019, THE SURGEON NOTED REFRACTIVE SURPRISE OF -1.25D ALTHOUGH THEY EXPECTED 0D. IN ADDITION THE LENS WAS SMALL AND THEY NOTICED LOW VAULTING. LENS REMAINS IMPLANTED. ADDITIONAL INFORMATION HAS BEEN REQUESTED BUT NONE HAS BEEN FORTHCOMING. IF ADDITIONAL INFORMATION IS…	Lens Retention	Unknown
https://www.accessdata.fda.gov/scripts/cdrh/cfdocs/cfMAUDE/Detail.CFM?MDRFOI__ID=8261656&pc=MTA	2023826-2019-00159	NA	Malfunction	STAAR SURGICAL COMPANY	2019-01-18	MTA	IMPLANTABLE COLLAMER LENS (ICL)	Misfocusing; Inadequacy of Device Shape and/or Size	Blurred Vision	N/A	NA	1	Event Description: (OS) LEFT EYE: THE REPORTER INDICATED THAT ON (B)(6) 2018 THE SURGEON SEEN PATIENT WHO WAS SEEKING REFRACTIVE SURGERY. UPON EXAMINATION, THE PATIENTS UNCORRECTED DISTANCE VISUAL ACUITY WAS COUNTING FINGERS AT 2 METERS OF CORRECTED 20/22 IN EACH EYE THE PATIENT WAS MYOPIC AND PRESBYOPIA AND WAS THOROUGHLY EXPLAINED TO PATIENT BEFORE SURGERY. ON (B)(6) 2018, THE PATIENT HAD UNDER…	Lens Retention	Unknown
https://www.accessdata.fda.gov/scripts/cdrh/cfdocs/cfMAUDE/Detail.CFM?MDRFOI__ID=8261800&pc=MTA	2023826-2019-00160	NA	Malfunction	STAAR SURGICAL COMPANY	2019-01-18 05:00:00	MTA	IMPLANTABLE COLLAMER LENS (ICL)	Misfocusing; Inadequacy of Device Shape and/or Size	Blurred Vision	N/A	NA	1	Event Description: (OD) RIGHT EYE: THE REPORTER INDICATED THAT ON (B)(6) 2018 THE SURGEON SEEN PATIENT WHO WAS SEEKING REFRACTIVE SURGERY. UPON EXAMINATION, THE PATIENTS UNCORRECTED DISTANCE VISUAL ACUITY WAS COUNTING FINGERS AT 2 METERS OF CORRECTED 20/22 IN EACH EYE THE PATIENT WAS MYOPIC AND PRESBYOPIA AND WAS THOROUGHLY EXPLAINED TO PATIENT BEFORE SURGERY. ON (B)(6) 2018, THE PATIENT HAD UNDE…	Lens Retention	Unknown
https://www.accessdata.fda.gov/scripts/cdrh/cfdocs/cfMAUDE/Detail.CFM?MDRFOI__ID=10491987&pc=MTA	2023826-2020-01957	NA	Injury	STAAR SURGICAL COMPANY	2020-09-03 04:00:00	MTA	IMPLANTABLE COLLAMER LENS (ICL)	Misfocusing; Inadequacy of Device Shape and/or Size	Blurred Vision	N/A	NA	1	Event Description: THE REPORTER INDICATED THAT THE SURGEON IMPLANTED A 13.2MM MICL13.2 IMPLANTABLE COLLAMER LENS, -14.5 DIOPTER, INTO THE PATIENT'S RIGHT (OD) EYE. THE SURGEON REPORTS AN UNEXPECTED REFRACTIVE RESULT WITH ANTERIOR VAULT. ATTEMPTS TO OBTAIN ADDITIONAL INFORMATION HAVE NOT BEEN SUCCESSFUL. Manufacturer Narrative: ADDITIONAL INFORMATION: H3- DEVICE EVALUATION: LENS WAS RETURNED DRY I…	Lens Retention	Unknown
https://www.accessdata.fda.gov/scripts/cdrh/cfdocs/cfMAUDE/Detail.CFM?MDRFOI__ID=10931407&pc=MTA	2023826-2020-02739	NA	Malfunction	STAAR SURGICAL COMPANY	2020-12-02 05:00:00	MTA	IMPLANTABLE COLLAMER LENS (ICL)	Misfocusing; Inadequacy of Device Shape and/or Size	Blurred Vision	N/A	NA	1	Event Description: THE REPORTER INDICATED THAT REFREACTIVE SURPRISE HAS BEEN OBSERVED IN PATIENT. ADDITIONAL INFORMATION HAS BEEN REQUESTED BUT NONE HAS BEEN FORTHCOMING. IF ADDITIONAL INFORMATION IS RECEIVED A SUPPLEMENTAL MEDWATCH REPORT WILL BE SUBMITTED. Manufacturer Narrative: ADDITIONAL INFORMATION: B5 - THE REPORTER INDICATED THAT A 13.2MM, VICMO13.2, -15.50 DIOPTER, IMPLANTABLE COLLAMER L…	Lens Retention	Unknown
https://www.accessdata.fda.gov/scripts/cdrh/cfdocs/cfMAUDE/Detail.CFM?MDRFOI__ID=12119243&pc=MTA	2023826-2021-02332	NA	Injury	STAAR SURGICAL COMPANY	2021-07-05 04:00:00	MTA	IMPLANTABLE COLLAMER LENS	Misfocusing; Inadequacy of Device Shape and/or Size	Blurred Vision	NA	NA	1	Event Description: THE REPORTER INDICATED THAT THE SURGEON IMPLANTED A 12.6MM VICMO12.6 IMPLANTABLE COLLAMER LENS, -10.0 DIOPTER INTO THE PATIENT'S RIGHT EYE (OD) ON (B)(6) 2020. THE SURGEON REPORTS 0 VAULT AND SLIGHTLY BLURRY VISION. REPORTEDLY, THE LENS REMAINS IMPLANTED. Manufacturer Narrative: B5: ADDITIONAL INFORMATION: THE REASON FOR THE REPLACEMENT LENS IS "LOW ARCH AND HIGH". THE PATIENT …	Lens Retention + Secondary Operation	Resolved
https://www.accessdata.fda.gov/scripts/cdrh/cfdocs/cfMAUDE/Detail.CFM?MDRFOI__ID=12457498&pc=MTA	2023826-2021-03551	NA	Malfunction	STAAR SURGICAL COMPANY	2021-09-10 04:00:00	MTA	IMPLANTABLE COLLAMER LENS (ICL)	Misfocusing; Inadequacy of Device Shape and/or Size	Blurred Vision	P030016	NA	1	Event Description: THE REPORTER INDICATED THAT THE SURGEON IMPLANTED AN MICL IMPLANTABLE COLLAMER LENS, -10.5 DIOPTER INTO THE PATIENT'S EYE. THE SURGEON REPORTS "300% VAULT" AND +2.00D HYPEROPIC OUTCOME. ATTEMPTS TO OBTAIN ADDITIONAL INFORMATION HAVE NOT BEEN SUCCESSFUL. Manufacturer Narrative: B5: ADDITIONAL INFORMATION: REPORTEDLY THE PATIENT CONTINUES TO IMPROVE AND SO THE DATA IS SHIFTING. C…	Unknown	Unknown
https://www.accessdata.fda.gov/scripts/cdrh/cfdocs/cfMAUDE/Detail.CFM?MDRFOI__ID=15964379&pc=MTA	2023826-2022-04176	NA	Malfunction	STAAR SURGICAL COMPANY	2022-12-12 05:00:00	MTA	IMPLANTABLE COLLAMER LENS (ICL)	Misfocusing; Inadequacy of Device Shape and/or Size	Blurred Vision	P030016	NA	1	Event Description: THE REPORTER INDICATED THAT THE SURGEON IMPLANTED A 13.2MM VICM5_13.2; -03.50 DIOPTER IMPLANTABLE COLLAMER LENS INTO THE PATIENT'S RIGHT EYE (OD) ON (B)(6) 2022; AS A REPLACEMENT LENS. IT WAS INDICATED THAT THE PATIENT EXPERIENCED LOW VAULTING WITH RESIDUAL ASTIGMATISM. LENS REMAINS IMPLANTED. Manufacturer Narrative: CORRECTED DATA: G2: "OTHER: ITALY" SHOULD BE CORRECTED TO "OT…	Lens Repositioning	Resolved
https://www.accessdata.fda.gov/scripts/cdrh/cfdocs/cfMAUDE/Detail.CFM?MDRFOI__ID=16739724&pc=MTA	2023826-2023-01368	NA	Injury	STAAR SURGICAL COMPANY	2023-04-13 04:00:00	MTA	IMPLANTABLE COLLAMER LENS (ICL)	Misfocusing; Inadequacy of Device Shape and/or Size	Blurred Vision	P030016	NA	1	Event Description: THE REPORTER INDICATED THAT THE SURGEON IMPLANTED AN IMPLANTABLE COLLAMER LENS INTO THE PATIENT'S LEFT EYE (OS). THE SURGEON REPORTS THERE IS ZERO VAULTING WITH REFRACTIVE CHANGE OVER TIME. LENS REMAINS IMPLANTED. ATTEMPTS TO OBTAIN ADDITIONAL INFORMATION HAVE NOT BEEN SUCCESSFUL. IF ADDITIONAL INFORMATION IS RECEIVED A SUPPLEMENTAL MEDWATCH REPORT WILL BE SUBMITTED. Manufactur…	Lens Exchange	Resolved
https://www.accessdata.fda.gov/scripts/cdrh/cfdocs/cfMAUDE/Detail.CFM?MDRFOI__ID=16924450&pc=MTA	2023826-2023-01822	NA	Injury	STAAR SURGICAL COMPANY	2023-05-12 04:00:00	MTA	IMPLANTABLE COLLAMER LENS (ICL)	Misfocusing; Inadequacy of Device Shape and/or Size	Blurred Vision	P030016	NA	1	Event Description: THE REPORTER INDICATED THAT THE SURGEON IMPLANTED A 12.1MM VICM5_12.; -9.00 DIOPTER IMPLANTABLE COLLAMER LENS INTO THE PATIENT'S LEFT EYE (OS) ON (B)(6) 2021. THE PATIENT EXPERIENCED LOW VAULTING WITH REFRACTIVE SURPRISE. ON (B)(6) 2023 THE LENS WAS EXCHANGED WITH A LONGER LENGTH, DIFFERENT MODEL/POWER LENS AND THE PROBLEM WAS RESOLVED. Manufacturer Narrative: ADDITIONAL INFORM…	Lens Exchange	Resolved
https://www.accessdata.fda.gov/scripts/cdrh/cfdocs/cfMAUDE/Detail.CFM?MDRFOI__ID=17484564&pc=MTA	2023826-2023-03356	NA	Injury	STAAR SURGICAL COMPANY	2023-08-08 04:00:00	MTA	IMPLANTABLE COLLAMER LENS (ICL)	Misfocusing; Inadequacy of Device Shape and/or Size	Blurred Vision	P030016	NA	1	Event Description: THE REPORTER INDICATED THAT A 12.6MM VTICM5_12.6 IMPLANTABLE COLLAMER LENS OF -13.50 DIOPTER WAS IMPLANTED INTO THE PATIENT'S RIGHT EYE (OD) ON (B)(6) 2023. PATIENTS VISION AFTER SURGERY WAS 20/50 +1 WITH VAULT AROUND 1000. AFTER 2 WEEKS WITH NO VISUAL IMPROVEMENT, THE LENS WAS EXCHANGED FOR A TORIC LENS OF SHORTER LENGTH AND DIFFERENT POWER. IF ADDITIONAL INFORMATION IS RECEIV…	Lens Exchange	Resolved
https://www.accessdata.fda.gov/scripts/cdrh/cfdocs/cfMAUDE/Detail.CFM?MDRFOI__ID=17894899&pc=MTA	2023826-2023-04407	NA	Injury	STAAR SURGICAL COMPANY	2023-10-09 04:00:00	MTA	IMPLANTABLE COLLAMER LENS (ICL)	Misfocusing; Inadequacy of Device Shape and/or Size	Blurred Vision	P030016	NA	1	Event Description: THE REPORTER INDICATED THAT THE SURGEON IMPLANTED A 12.6MM VICM5 12.6, -6.5 DIOPTER, IMPLANTABLE COLLAMER LENS INTO THE PATIENT'S LEFT EYE (OS) ON (B)(6) 2020. REFRACTIVE CHANGE OVERTIME WAS OBSERVED. LENS REMAINS IMPLANTED. CAUSE OF THE EVENT IS REPORTED AS UNKNOWN. ADDITIONAL INFORMATION HAS BEEN REQUESTED BUT NONE HAS BEEN FORTHCOMING. Manufacturer Narrative: ADDITIONAL INFO…	Lens Exchange	Resolved
https://www.accessdata.fda.gov/scripts/cdrh/cfdocs/cfMAUDE/Detail.CFM?MDRFOI__ID=17981074&pc=MTA	2023826-2023-04657	NA	Injury	STAAR SURGICAL COMPANY	2023-10-20 04:00:00	MTA	IMPLANTABLE COLLAMER LENS (ICL)	Misfocusing; Inadequacy of Device Shape and/or Size	Blurred Vision	P030016	NA	1	Event Description: THE REPORTER INDICATED THAT A 12.6MM VICM5 12.6 IMPLANTABLE COLLAMER LENS OF -3.50 DIOPTER WAS IMPLANTED INTO THE LEFT EYE (OS) ON (B)(6) 2022. LOW VAULT WITH REFRACTIVE CHANGE OVER TIME WAS REPORTED. LENS REMAINS IMPLANTED. CAUSE OF THE EVENT IS UNKNOWN. IF ADDITIONAL INFORMATION IS RECEIVED A SUPPLEMENTAL MEDWATCH REPORT WILL BE SUBMITTED. Manufacturer Narrative: H6-INVESTIGA…	Lens Exchange	Resolved
https://www.accessdata.fda.gov/scripts/cdrh/cfdocs/cfMAUDE/Detail.CFM?MDRFOI__ID=15890872&pc=MTA	2023826-2022-04363	2019-12-11	Injury	STAAR SURGICAL COMPANY	2022-11-30	MTA	IMPLANTABLE COLLAMER LENS (ICL)	Misfocusing; Inadequacy of Device Shape and/or Size; Adverse Event Without Identified Device or Use Problem	Blurred Vision	P030016	NA	1	Event Description: THE REPORTER INDICATED THAT THE SURGEON IMPLANTED A 12.6MM VICM5_12.6; -5.0 DIOPTER IMPLANTABLE COLLAMER LENS INTO THE PATIENT'S RIGHT EYE (OD) ON (B)(6) 2019. THE SURGEON REPORTS LOW VAULTING AND REFRACTIVE CHANGE OVER TIME. LENS REMAINS IMPLANTED. THE CAUSE OF THE EVENT WAS REPORTED AS UNKNOWN. Manufacturer Narrative: NO SIMILAR COMPLAINT TYPE EVENTS REPORTED FOR UNITS WITHIN…	Lens Exchange	Resolved
https://www.accessdata.fda.gov/scripts/cdrh/cfdocs/cfMAUDE/Detail.CFM?MDRFOI__ID=8412314&pc=MTA	2023826-2019-00423	2018-08-09	Injury	STAAR SURGICAL COMPANY	2019-03-12	MTA	IMPLANTABLE COLLAMER LENS (ICL)	Misfocusing; Off-Label Use	Blurred Vision	N/A	NA	1	Event Description: THE REPORTER INDICATED THAT A 12.6MM, VICMO12.6, -01.00 DIOPTER, IMPLANTABLE COLLAMER LENS WAS IMPLANTED INTO THE PATIENTS LEFT EYE (OS) ON (B)(6) 2018. REFRACTIVE SURPRISE WAS OBSERVED, THE LENS WAS REMOVED AND EXCHANGED ON (B)(6) 2019 AND THE PROBLEM WAS RESOLVED. Manufacturer Narrative: DEVICE EVALUATION: THE LENS WAS RETURNED DRY IN A LENS CASE/VIAL. THERE WAS CLEAR SURGICA…	Lens Exchange	Resolved
https://www.accessdata.fda.gov/scripts/cdrh/cfdocs/cfMAUDE/Detail.CFM?MDRFOI__ID=8552452&pc=MTA	2023826-2019-00649	2019-03-27	Malfunction	STAAR SURGICAL COMPANY	2019-04-25	MTA	IMPLANTABLE COLLAMER LENS (ICL)	Misfocusing; Off-Label Use	Blurred Vision	P030016	NA	1	Event Description: THE REPORTER INDICATED THAT THE SURGEON IMPLANTED A 12.6MM MICL12.6 IMPLANTABLE COLLAMER LENS, -10.5 DIOPTER, INTO THE PATIENT'S RIGHT (OD) EYE. THE SURGEON REPORTS REFRACTIVE SURPRISE AND BLURRY VISION. THE LENS REMAINS IMPLANTED AND THE CAUSE OF THE EVENT IS REPORTED AS UNKNOWN. ATTEMPTS TO OBTAIN ADDITIONAL INFORMATION HAVE NOT BEEN SUCCESSFUL. Manufacturer Narrative: CLAIM#…	Lens Retention	Unknown
https://www.accessdata.fda.gov/scripts/cdrh/cfdocs/cfMAUDE/Detail.CFM?MDRFOI__ID=11352467&pc=MTA	2023826-2021-00490	2019-09-02	Injury	STAAR SURGICAL COMPANY	2021-02-19	MTA	IMPLANTABLE COLLAMER LENS (ICL)	Misfocusing; Off-Label Use	Blurred Vision	NA	NA	1	Event Description: THE REPORTER INDICATED THAT A 12.6MM, VICMO12.6, -3.50 DIOPTER, IMPLANTABLE COLLAMER LENS WAS IMPLANTED INTO THE PATIENTS LEFT EYE (OS) ON (B)(6) 2019. ON (B)(6) 2019 THE LENS WAS EXCHANGED FOR A DIFFERENT DIOPTER LENS DUE TO REFRACTIVE SURPRISE. THIS EXCHANGE RESOLVED THE PROBLEM. CAUSE OF EVENT WAS REPORTED AS UNKNOWN. Manufacturer Narrative: H3 - DEVICE EVALUATION: THE LENS …	Lens Exchange	Resolved
https://www.accessdata.fda.gov/scripts/cdrh/cfdocs/cfMAUDE/Detail.CFM?MDRFOI__ID=9412440&pc=MTA	2023826-2019-02275	2019-10-29	Injury	STAAR SURGICAL COMPANY	2019-12-04	MTA	IMPLANTABLE COLLAMER LENS (ICL)	Misfocusing; Off-Label Use	Blurred Vision	NA	NA	1	Event Description: THE REPORTER INDICATED THAT THE SURGEON IMPLANTED A 12.6MM VICM5_12.6 IMPLANTABLE COLLAMER LENS, DIOPTER -14.0 INTO THE PATIENT'S LEFT EYE (OS) ON (B)(6) 2019. THE SURGEON NOTES LOSS OF BCVA AND REFRACTIVE SURPRISE. REPORTEDLY THE LENS REMAINS IMPLANTED. Manufacturer Narrative: THIS PRODUCT IS MANUFACTURED IN THE U.S. BUT NOT MARKETED IN THE U.S. (B)(4).	Lens Retention	Unknown
https://www.accessdata.fda.gov/scripts/cdrh/cfdocs/cfMAUDE/Detail.CFM?MDRFOI__ID=9988414&pc=MTA	2023826-2020-00949	2020-04-09	Malfunction	STAAR SURGICAL COMPANY	2020-04-22	MTA	IMPLANTABLE COLLAMER LENS (ICL)	Misfocusing; Off-Label Use	Blurred Vision	NA	NA	1	Event Description: THE REPORTER INDICATED THE SURGEON IMPLANTED A 12.6MM VICM5_12.6 IMPLANTABLE COLLAMER LENS, -05.50 DIOPTER, IN THE PATIENT'S LEFT EYE (OS) ON (B)(6) 2020. THE LENS WAS IMPLANTED AS AN EXCHANGE LENS. POST-OP, THE NEAR VISION WAS SLIGHTLY IMPROVED BUT STILL NOT IDEAL. THE PATIENT STILL EXPERIENCED A REFRACTIVE SURPRISE AND WILL BE MONITORED. THE LENS REMAINED IMPLANTED. SEE MFR R…	Lens Retention	Unknown
https://www.accessdata.fda.gov/scripts/cdrh/cfdocs/cfMAUDE/Detail.CFM?MDRFOI__ID=12155602&pc=MTA	2023826-2021-02441	2020-08-26	Injury	STAAR SURGICAL COMPANY	2021-07-12	MTA	IMPLANTABLE COLLAMER LENS	Misfocusing; Off-Label Use	Blurred Vision	NA	NA	1	Event Description: THE REPORTER INDICATED THAT THE SURGEON IMPLANTED A 12.6MM VICMO12.6 IMPLANTABLE COLLAMER LENS, -9.0 DIOPTER, INTO THE PATIENT'S RIGHT EYE (OD) ON (B)(6) 2020. REPORTEDLY, THE LENS WAS EXCHANGED ON (B)(6) 2020 WITH A SAME SIZE DIFFERENT DIOPTER LENS DUE TO REFRACTIVE SURPRISE. THE PROBLEM WAS RESOLVED. THE CAUSE OF THE EVENT IS REPORTED AS UNKNOWN. Manufacturer Narrative: H3: D…	Lens Exchange	Resolved
https://www.accessdata.fda.gov/scripts/cdrh/cfdocs/cfMAUDE/Detail.CFM?MDRFOI__ID=15288032&pc=MTA	2023826-2022-02900	2020-08-31	Injury	STAAR SURGICAL COMPANY	2022-08-24	MTA	IMPLANTABLE COLLAMER LENS (ICL)	Misfocusing; Off-Label Use	Blurred Vision	P030016	NA	1	Event Description: THE REPORTER INDICATED THAT A 12.6MM VICMO12.6 IMPLANTABLE COLLAMER LENS OF -4.0 DIOPTER WAS IMPLANTED IN THE PATIENT'S LEFT EYE (OS) ON (B)(6) 2020. ON (B)(6) 2020, THE LENS WAS EXCHANGED FOR A SAME MODEL, SAME SIZE LENS DUE TO REFRACTIVE SURPRISE. THE PROBLEM WAS RESOLVED. CAUSE OF THE EVENT IS UNKNOWN. Manufacturer Narrative: WORK ORDER SEARCH: NO SIMILAR COMPLAINTS WITHIN A…	Lens Exchange	Resolved
https://www.accessdata.fda.gov/scripts/cdrh/cfdocs/cfMAUDE/Detail.CFM?MDRFOI__ID=11453120&pc=MTA	2023826-2021-00602	2020-11-05	Injury	STAAR SURGICAL COMPANY	2021-03-10	MTA	IMPLANTABLE COLLAMER LENS (ICL)	Misfocusing; Off-Label Use	Blurred Vision	N/A	NA	1	Event Description: THE REPORTER INDICATED THAT A 12.6MM, VICMO 12.6, -10.00 DIOPTER, IMPLANTABLE COLLAMER LENS WAS IMPLANTED INTO THE PATIENT'S RIGHT EYE (OD) ON (B)(6) 2020. ON (B)(6) 2020 THE LENS WAS EXCHANGED WITH A SAME LENGTH TORIC LENS (-10.50/1.0/171 (SPHERE/CYLINDER/AXIS)) DUE TO REFRACTIVE SURPRISE. THIS RESOLVED THE PROBLEM. Manufacturer Narrative: ADDITIONAL INFORMATION: H3 - DEVICE E…	Lens Exchange	Resolved
https://www.accessdata.fda.gov/scripts/cdrh/cfdocs/cfMAUDE/Detail.CFM?MDRFOI__ID=11697121&pc=MTA	2023826-2021-01090	2020-11-05	Injury	STAAR SURGICAL COMPANY	2021-04-20	MTA	IMPLANTABLE COLLAMER LENS	Misfocusing; Off-Label Use	Blurred Vision	NA	NA	1	Event Description: THE REPORTER INDICATED THAT THE SURGEON IMPLANTED A 12.6MM VICMO12.6 IMPLANTABLE COLLAMER LENS, -9.5 DIOPTER, INTO THE PATIENT'S LEFT EYE (OS) ON (B)(6) 2020. ON (B)(6) 2020 THE LENS WAS EXCHANGED WITH A SAME SIZE DIFFERENT MODEL LENS DUE TO REFRACTIVE SURPRISE. THE PROBLEM WAS RESOLVED. REPORTEDLY AFTER EXCHANGE THE POSTOP VISUAL ACUITY WAS 1.2 AND NO GHOSTING WAS REPORTED. Ma…	Lens Exchange	Resolved
https://www.accessdata.fda.gov/scripts/cdrh/cfdocs/cfMAUDE/Detail.CFM?MDRFOI__ID=11714206&pc=MTA	2023826-2021-01112	2020-12-31	Injury	STAAR SURGICAL COMPANY	2021-04-23	MTA	IMPLANTABLE COLLAMER LENS (ICL)	Misfocusing; Off-Label Use	Blurred Vision	NA	NA	1	Event Description: THE REPORTER INDICATED THAT A 13.2MM, VICMO13.2, -6.50 DIOPTER, IMPLANTABLE COLLAMER LENS WAS IMPLANTED INTO THE PATIENTS RIGHT EYE (OD) ON (B)(6) 2020. ON (B)(6) 2020 THE LENS WAS EXCHANGED FOR A DIFFERENT DIOPTER LENS DUE TO REFRACTIVE SURPRISE AND BLURRED VISION. THIS EXCHANGE RESOLVED THE PROBLEM. IN THE REPORTERS OPINION THE CAUSE OF THIS EVENT WAS PATIENT RELATED FACTOR. …	Lens Exchange	Resolved
https://www.accessdata.fda.gov/scripts/cdrh/cfdocs/cfMAUDE/Detail.CFM?MDRFOI__ID=12222296&pc=MTA	2023826-2021-02819	2021-03-03	Injury	STAAR SURGICAL COMPANY	2021-07-23	MTA	IMPLANTABLE COLLAMER LENS	Misfocusing; Off-Label Use	Blurred Vision	NA	NA	1	Event Description: THE REPORTER INDICATED THAT THE SURGEON IMPLANTED A 12.6MM VICMO12.6 IMPLANTABLE COLLAMER LENS, -1.75 DIOPTER INTO THE PATIENT'S RIGHT EYE (OD) ON (B)(6) 2020. REPORTEDLY, THE LENS WAS EXCHANGED ON (B)(6) 2021 WITH A SAME SIZE DIFFERENT DIOPTER LENS DUE TO REFRACTIVE SURPRISE. THE PROBLEM WAS RESOLVED. THE CAUSE OF THE EVENT IS REPORTED AS UNKNOWN. Manufacturer Narrative: ADDIT…	Lens Exchange	Resolved
https://www.accessdata.fda.gov/scripts/cdrh/cfdocs/cfMAUDE/Detail.CFM?MDRFOI__ID=12378560&pc=MTA	2023826-2021-03376	2021-03-28	Injury	STAAR SURGICAL COMPANY	2021-08-27	MTA	IMPLANTABLE COLLAMER LENS	Misfocusing; Off-Label Use	Blurred Vision	NA	NA	1	Event Description: THE REPORTER INDICATED THAT THE SURGEON IMPLANTED A 12.1MM VICMO12.1 IMPLANTABLE COLLAMER LENS, -3.0 DIOPTER INTO THE PATIENT'S RIGHT EYE (OD) ON (B)(6) 2021. REPORTEDLY, THE LENS WAS EXCHANGED ON (B)(6) 2021 WITH A SAME SIZE DIFFERENT DIOPTER LENS DUE TO REFRACTIVE SURPRISE. THE PROBLEM WAS RESOLVED. THE CAUSE OF THE EVENT IS REPORTED AS UNKNOWN. Manufacturer Narrative: H3 - D…	Lens Exchange	Resolved
https://www.accessdata.fda.gov/scripts/cdrh/cfdocs/cfMAUDE/Detail.CFM?MDRFOI__ID=12072264&pc=MTA	2023826-2021-02071	2021-04-22	Injury	STAAR SURGICAL COMPANY	2021-06-25	MTA	IMPLANTABLE COLLAMER LENS	Misfocusing; Off-Label Use	Blurred Vision	NA	NA	1	Event Description: THE REPORTER INDICATED THAT THE SURGEON IMPLANTED A 12.6MM VICMO12.6 IMPLANTABLE COLLAMER LENS, -13.0 DIOPTER, INTO THE PATIENT'S RIGHT EYE (OD) ON (B)(6) 2021. REPORTEDLY, THE LENS WAS EXCHANGED ON (B)(6) 2021 WITH A SAME SIZE DIFFERENT DIOPTER LENS DUE TO REFRACTIVE SURPRISE. THE PROBLEM WAS RESOLVED. THE CAUSE OF THE EVENT IS REPORTED AS UNKNOWN. THE SURGEON REPORTS, "THE PA…	Lens Exchange	Resolved
https://www.accessdata.fda.gov/scripts/cdrh/cfdocs/cfMAUDE/Detail.CFM?MDRFOI__ID=12599748&pc=MTA	2023826-2021-03907	2021-04-22	Injury	STAAR SURGICAL COMPANY	2021-10-08	MTA	IMPLANTABLE COLLAMER LENS	Misfocusing; Off-Label Use	Blurred Vision	NA	NA	1	Event Description: THE REPORTER INDICATED THAT THE SURGEON IMPLANTED A 12.6MM VICMO12.6 IMPLANTABLE COLLAMER LENS, -15.0 DIOPTER INTO THE PATIENT'S RIGHT EYE (OD) ON (B)(6) 2021. REPORTEDLY, THE LENS WAS EXCHANGED ON (B)(6) 2021 WITH A SAME SIZE DIFFERENT MODEL LENS DUE TO REFRACTIVE SURPRISE. THE PROBLEM WAS RESOLVED. THE CAUSE OF THE EVENT IS REPORTED AS UNKNOWN. Manufacturer Narrative: H3: DEV…	Lens Exchange	Resolved
https://www.accessdata.fda.gov/scripts/cdrh/cfdocs/cfMAUDE/Detail.CFM?MDRFOI__ID=12599734&pc=MTA	2023826-2021-03917	2021-05-11	Injury	STAAR SURGICAL COMPANY	2021-10-08	MTA	IMPLANTABLE COLLAMER LENS	Misfocusing; Off-Label Use	Blurred Vision	NA	NA	1	Event Description: THE REPORTER INDICATED THAT THE SURGEON IMPLANTED A 12.6MM VICMO12.6 IMPLANTABLE COLLAMER LENS, -16.0 DIOPTER INTO THE PATIENT'S RIGHT EYE (OD) ON (B)(6) 2021. REPORTEDLY, THE LENS WAS EXCHANGED ON (B)(6) 2021 WITH A SAME SIZE DIFFERENT MODEL LENS DUE TO REFRACTIVE SURPRISE. THE PROBLEM WAS RESOLVED. THE CAUSE OF THE EVENT IS REPORTED AS UNKNOWN. Manufacturer Narrative: H3: DEV…	Lens Exchange	Resolved
https://www.accessdata.fda.gov/scripts/cdrh/cfdocs/cfMAUDE/Detail.CFM?MDRFOI__ID=12363349&pc=MTA	2023826-2021-03286	2021-06-16	Injury	STAAR SURGICAL COMPANY	2021-08-24	MTA	IMPLANTABLE COLLAMER LENS	Misfocusing; Off-Label Use	Blurred Vision	NA	NA	1	Event Description: THE REPORTER INDICATED THAT THE SURGEON IMPLANTED A 12.6MM VICMO12.6 IMPLANTABLE COLLAMER LENS, -9.5 DIOPTER, INTO THE PATIENT'S LEFT EYE (OS) ON (B)(6) 2021. ON (B)(6) 2021 THE LENS WAS EXCHANGED WITH A SAME SIZE DIFFERENT MODEL LENS DUE TO REFRACTIVE SURPRISE. THE PROBLEM WAS RESOLVED. THE CAUSE OF THE EVENT IS REPORTED AS UNKNOWN. Manufacturer Narrative: ADDITIONAL INFORMATI…	Lens Exchange	Resolved
https://www.accessdata.fda.gov/scripts/cdrh/cfdocs/cfMAUDE/Detail.CFM?MDRFOI__ID=12524337&pc=MTA	2023826-2021-03717	2021-07-14	Injury	STAAR SURGICAL COMPANY	2021-09-24	MTA	IMPLANTABLE COLLAMER LENS (ICL)	Misfocusing; Off-Label Use	Blurred Vision	NA	NA	1	Event Description: THE REPORTER INDICATED THAT A 12.1MM, VICMO12.1,-7.5 DIOPTER, IMPLANTABLE COLLAMER LENS WAS IMPLANTED INTO THE PATIENTS LEFT EYE (OS) ON (B)(6) 2021. ON (B)(6) 2021 THE LENS WAS EXCHANGED FOR A DIFFERENT DIOPTER LENS DUE TO REFRACTIVE SURPRISE. THIS EXCHANGE RESOLVED THE PROBLEM. CAUSE OF EVENT UNKNOWN. Manufacturer Narrative: CLAIM # (B)(4). Manufacturer Narrative: H3- DEVICE …	Lens Exchange	Resolved
https://www.accessdata.fda.gov/scripts/cdrh/cfdocs/cfMAUDE/Detail.CFM?MDRFOI__ID=12874462&pc=MTA	2023826-2021-04518	2021-08-30	Injury	STAAR SURGICAL COMPANY	2021-11-25	MTA	IMPLANTABLE COLLAMER LENS (ICL)	Misfocusing; Off-Label Use	Blurred Vision	NA	NA	1	Event Description: THE REPORTER INDICATED THAT A 12.6MM, VICMO12.6, -4.50 DIOPTER, IMPLANTABLE COLLAMER LENS WAS IMPLANTED INTO THE PATIENTS LEFT EYE (OS) ON (B)(6) 2021. ON (B)(6) 2021 THE LENS WAS EXCHANGED FOR A DIFFERENT MODEL AND POWER LENS DUE TO REFRACTIVE SURPRISE. THIS EXCHANGE RESOLVED THE PROBLEM. CAUSE OF EVENT WAS UNKNOWN. Manufacturer Narrative: WEIGHT, ETHNICITY, RACE: UNK. DATE RE…	Lens Exchange	Resolved
https://www.accessdata.fda.gov/scripts/cdrh/cfdocs/cfMAUDE/Detail.CFM?MDRFOI__ID=13319427&pc=MTA	2023826-2022-00244	2021-08-30	Malfunction	STAAR SURGICAL COMPANY	2022-01-21	MTA	IMPLANTABLE COLLAMER LENS (ICL)	Misfocusing; Off-Label Use	Blurred Vision	NA	NA	1	Event Description: THE REPORTER INDICATED THE SURGEON IMPLANTED A 12.1MM VICMO12.1 IMPLANTABLE COLLAMER LENS, -02.25 DIOPTER, IN THE PATIENTS LEFT EYE (OS), ON (B)(6) 2021. THE PATIENT COMPLAINED OF BLURRED VISON AND THE LENS REMAINED IMPLANTED. THIS WAS THE REPLACEMENT LENS, SEE MFR. REPORT # 2023826-2022-00190 FOR THE INITIAL LENS. ADDITIONAL INFORMATION HAS BEEN REQUESTED BUT NONE HAS BEEN FOR…	Lens Retention	Unknown
https://www.accessdata.fda.gov/scripts/cdrh/cfdocs/cfMAUDE/Detail.CFM?MDRFOI__ID=12903199&pc=MTA	2023826-2021-04615	2021-09-29	Injury	STAAR SURGICAL COMPANY	2021-11-30	MTA	IMPLANTABLE COLLAMER LENS (ICL)	Misfocusing; Off-Label Use	Blurred Vision	NA	NA	1	Event Description: THE REPORTER INDICATED THAT THE SURGEON IMPLANTED A 12.1MM VICMO12.1; -16.0 DIOPTER IMPLANTABLE COLLAMER LENS INTO THE PATIEN'S LEFT EYE (OS) ON (B)(6) 2021. ON (B)(6) 2021 THE LENS WAS EXPLANTED DUE TO REFRACTIVE SURPRISE. THIS RESOLVED THE PROBLEM. THE CAUSE OF THE EVENT WAS REPORTED AS UNKNOWN. Manufacturer Narrative: H3 DEVICE EVALUATION: THE LENS WAS RETURNED WITH MOISTURE…	Lens Extraction	Resolved
https://www.accessdata.fda.gov/scripts/cdrh/cfdocs/cfMAUDE/Detail.CFM?MDRFOI__ID=13581963&pc=MTA	2023826-2022-00591	2021-11-16	Injury	STAAR SURGICAL COMPANY	2022-02-22	MTA	IMPLANTABLE COLLAMER LENS (ICL)	Misfocusing; Off-Label Use	Blurred Vision	NA	NA	1	Event Description: THE REPORTER INDICATED THAT THE SURGEON IMPLANTED A 12.1MM VICM5_12.1; -4.00 DIOPTER IMPLANTABLE COLLAMER LENS INTO THE PATIENT'S RIGHT EYE (OD) ON (B)(6) 2021. THE PATIENT EXPERIENCED REFRACTIVE SURPRISE. ON (B)(6) 2022 THE LENS WAS EXCHANGED WITH A SAME LENGTH BUT DIFFERENT POWER LENS. THIS RESOLVED THE PROBLEM. THE CAUSE OF THE EVENT WAS REPORTED AS A PATIENT RELATED FACTOR.…	Lens Exchange	Resolved
https://www.accessdata.fda.gov/scripts/cdrh/cfdocs/cfMAUDE/Detail.CFM?MDRFOI__ID=14639725&pc=MTA	2023826-2022-01509	2022-01-12	Injury	STAAR SURGICAL COMPANY	2022-06-08	MTA	IMPLANTABLE COLLAMER LENS (ICL)	Misfocusing; Off-Label Use	Blurred Vision	P030016	NA	1	Event Description: THE REPORTER INDICATED THAT A 12.6MM VICMO12.6 IMPLANTABLE COLLAMER LENS OF -7.5 DIOPTER WAS IMPLANTED INTO THE PATIENT'S LEFT EYE (OS) ON (B)(6) 2021. ON (B)(6) 2022 THE LENS WAS EXCHANGED WITH A LENS OF DIFFERENT DIOPTER DUE TO REFRACTIVE SURPRISE. THE EXCHANGE RESOLVED THE PROBLEM. CAUSE IS REPORTED AS UNKNOWN. Manufacturer Narrative: H3 - DEVICE EVALUATION: THE LENS WAS RET…	Lens Exchange	Resolved
https://www.accessdata.fda.gov/scripts/cdrh/cfdocs/cfMAUDE/Detail.CFM?MDRFOI__ID=15462009&pc=MTA	2023826-2022-03136	2022-01-28	Injury	STAAR SURGICAL COMPANY	2022-09-21	MTA	IMPLANTABLE COLLAMER LENS (ICL)	Misfocusing; Off-Label Use	Blurred Vision	P030016	NA	1	Event Description: THE REPORTER INDICATED THAT A 12.1MM VICMO12.1 IMPLANTABLE COLLAMER LENS OF -5.0 DIOPTER WAS IMPLANTED IN THE PATIENT'S LEFT EYE (OS) ON (B)(6) 2022. ON (B)(6) 2022, THE LENS WAS EXCHANGED FOR A SAME MODEL, SAME SIZE LENS DUE TO REFRACTIVE SURPRISE. THE PROBLEM WAS RESOLVED. CAUSE OF THE EVENT IS UNKNOWN. REPORTEDLY, "THE PATIENT IS 43 YEARS OLD. CONSIDERING THE PREBYOPIA PROBL…	Lens Exchange	Resolved
https://www.accessdata.fda.gov/scripts/cdrh/cfdocs/cfMAUDE/Detail.CFM?MDRFOI__ID=15751843&pc=MTA	2023826-2022-04040	2022-06-25	Injury	STAAR SURGICAL COMPANY	2022-11-08	MTA	IMPLANTABLE COLLAMER LENS (ICL)	Misfocusing; Off-Label Use	Blurred Vision	P030016	NA	1	Event Description: THE REPORTER INDICATED THAT A 12.6MM VICMO12.6 IMPLANTABLE COLLAMER LENS OF -14.0 DIOPTER WAS IMPLANTED INTO THE PATIENT'S RIGHT EYE (OD) ON (B)(6) 2022. ON (B)(6) 2022 THE LENS WAS EXCHANGED FOR TORIC LENS DUE TO REFRACTIVE SURPRISE AND THE PROBLEM RESOLVED. CAUSE OF EVENT WAS UNKNOWN. Manufacturer Narrative: CORRECTED DATA: H10- CLAIM# (B)(4) SHOULD BE CORRECTED TO CLAIM# (B)…	Lens Exchange	Resolved
https://www.accessdata.fda.gov/scripts/cdrh/cfdocs/cfMAUDE/Detail.CFM?MDRFOI__ID=15640034&pc=MTA	2023826-2022-03702	2022-09-13	Injury	STAAR SURGICAL COMPANY	2022-10-20	MTA	IMPLANTABLE COLLAMER LENS (ICL)	Misfocusing; Off-Label Use	Blurred Vision	P030016	NA	1	Event Description: THE REPORTER INDICATED THAT A 12.6MM VICM5_12.6, -9.0 DIOPTER IMPLANTABLE COLLAMER LENS WAS IMPLANTED INTO THE PATIENT'S RIGHT EYE (OD) ON 18-MAY-2022. IT WAS REPORTED THAT LIMBAL RELAXING INCISIONS (LRIS) WERE MADE TO REDUCE ASTIGMATISM BUT IT DID NOT REDUCE THE EXPECTED AMOUNT. ON (B)(6) 2022 THE LENS WAS EXCHANGED FOR A TORIC LENS TO ADDRESS THE ASTIGMATISM (HIGH CYLINDER PO…	Lens Exchange	Resolved
https://www.accessdata.fda.gov/scripts/cdrh/cfdocs/cfMAUDE/Detail.CFM?MDRFOI__ID=15640127&pc=MTA	2023826-2022-03703	2022-09-13	Injury	STAAR SURGICAL COMPANY	2022-10-20	MTA	IMPLANTABLE COLLAMER LENS (ICL)	Misfocusing; Off-Label Use	Blurred Vision	P030016	NA	1	Event Description: THE REPORTER INDICATED THAT A 12.6MM VICM5_12.6, -8.0 DIOPTER IMPLANTABLE COLLAMER LENS WAS IMPLANTED INTO THE PATIENT'S LEFT EYE (OS) ON (B)(6) 2022. IT WAS REPORTED THAT LIMBAL RELAXING INCISIONS (LRIS) WERE MADE TO REDUCE ASTIGMATISM BUT IT DID NOT REDUCE THE EXPECTED AMOUNT. ON (B)(6) 2022 THE LENS WAS EXCHANGED FOR A TORIC LENS TO ADDRESS THE ASTIGMATISM (HIGH CYLINDER POW…	Lens Exchange	Resolved
https://www.accessdata.fda.gov/scripts/cdrh/cfdocs/cfMAUDE/Detail.CFM?MDRFOI__ID=15993591&pc=MTA	2023826-2022-04600	2022-10-05	Injury	STAAR SURGICAL COMPANY	2022-12-16	MTA	IMPLANTABLE COLLAMER LENS (ICL)	Misfocusing; Off-Label Use	Blurred Vision	P030016	NA	1	Event Description: THE REPORTER INDICATED THAT A 13.2MM VICMO13.2 -7.0 DIOPTER IMPLANTABLE COLLAMER LENS WAS IMPLANTED INTO THE PATIENT'S RIGHT EYE (OD) ON (B)(6) 2022. ON (B)(6) 2022 THE LENS WAS EXCHANGED FOR A DIFFERENT POWER LENS DUE TO REFRACTIVE SURPRISE AND THE PROBLEM RESOLVED. THE REPORTER STATED " AFTER THE OPERATION, HER BINOCULAR VISION WAS 1.2, BUT SHE FELT UNCOMFORTABLE NEAR VISION,…	Lens Exchange	Resolved
https://www.accessdata.fda.gov/scripts/cdrh/cfdocs/cfMAUDE/Detail.CFM?MDRFOI__ID=16916214&pc=MTA	2023826-2023-01799	2022-11-19	Injury	STAAR SURGICAL COMPANY	2023-05-11	MTA	IMPLANTABLE COLLAMER LENS (ICL)	Misfocusing; Off-Label Use	Blurred Vision	P030016	NA	1	Event Description: THE REPORTER INDICATED THAT THE SURGEON IMPLANTED A 12.6MM VICMO12.6; -7.5 DIOPTER IMPLANTABLE COLLAMER LENS INTO THE PATIENT'S LEFT EYE (OS) (B)(6) 2022. THE SURGEON REPORTS THERE WAS REFRACTIVE SURPRISE. ON (B)(6) 2023 THE LENS WAS EXCHANGED WITH A SAME LENGTH BUT DIFFERENT POWER LENS AND THIS RESOLVED THE PROBLEM. IT WAS ADDITIONALLY NOTED "PATIENT HAS SEEN NO PROBLEMS AT CL…	Lens Exchange	Resolved
https://www.accessdata.fda.gov/scripts/cdrh/cfdocs/cfMAUDE/Detail.CFM?MDRFOI__ID=16075853&pc=MTA	2023826-2022-04748	2022-11-25	Malfunction	STAAR SURGICAL COMPANY	2022-12-29	MTA	IMPLANTABLE COLLAMER LENS (ICL)	Misfocusing; Off-Label Use	Blurred Vision	NA	NA	1	Event Description: THE REPORTER INDICATED THAT A 12.0MM ICM12.0 IMPLANTABLE COLLAMER LENS OF -12.5 DIOPTER WAS IMPLANTED INTO THE PATIENT'S RIGHT EYE (OD) ON 15-FEB-2013. REFRACTIVE CHANGE OVERTIME WAS OBSERVED. Manufacturer Narrative: CORRECTED DATA: B1: ADVERSE EVENT SHOULD BE CORRECTED TO PRODUCT PROBLEM. B2: OUTCOMES ATTRIBUTED TO ADVERSE EVENT- SHOULD BE OMITTED FOR CORRECTION. H4: DEVICE MA…	Unknown	Unknown
https://www.accessdata.fda.gov/scripts/cdrh/cfdocs/cfMAUDE/Detail.CFM?MDRFOI__ID=16542287&pc=MTA	2023826-2023-00794	2022-11-29	Injury	STAAR SURGICAL COMPANY	2023-03-14	MTA	IMPLANTABLE COLLAMER LENS (ICL)	Misfocusing; Off-Label Use	Blurred Vision	P030016	NA	1	Event Description: THE REPORTER INDICATED THAT A 12.6MM VICMO12.6 IMPLANTABLE COLLAMER LENS OF -14.0 DIOPTER WAS IMPLANTED IN THE PATIENT'S RIGHT EYE (OD) ON (B)(6) 2022. ON (B)(6) 2022, THE LENS WAS EXCHANGED FOR A SAME SIZE LENS DUE TO REFRACTIVE SURPRISE AND REFRACTIVE CHANGE OVER TIME. THE PROBLEM WAS RESOLVED. CAUSE OF THE EVENT IS UNKNOWN. REPORTEDLY, "THE PATIENT'S AGE WAS OLD AND HAD DIFF…	Lens Exchange	Resolved
https://www.accessdata.fda.gov/scripts/cdrh/cfdocs/cfMAUDE/Detail.CFM?MDRFOI__ID=17347483&pc=MTA	2023826-2023-02986	2023-03-06	Injury	STAAR SURGICAL COMPANY	2023-07-18	MTA	IMPLANTABLE COLLAMER LENS (ICL)	Misfocusing; Off-Label Use	Blurred Vision	P030016	NA	1	Event Description: THE REPORTER INDICATED THAT A 12.6MM VICMO12.6 IMPLANTABLE COLLAMER LENS OF -14.00 DIOPTER WAS IMPLANTED INTO THE PATIENT'S RIGHT EYE (OD) ON (B)(6) 2023. ON (B)(6) 2023 THE LENS WAS EXCHANGED FOR A TORIC LENS OF DIFFERENT POWER DUE TO REFRACTIVE SURPRISE. THE EXCHANGE RESOLVED THE PROBLEM. CAUSE OF EVENT WAS UNKNOWN. Manufacturer Narrative: H3: DEVICE EVALUATION: THE LENS WAS …	Lens Exchange	Resolved
https://www.accessdata.fda.gov/scripts/cdrh/cfdocs/cfMAUDE/Detail.CFM?MDRFOI__ID=17347676&pc=MTA	2023826-2023-02987	2023-03-06	Injury	STAAR SURGICAL COMPANY	2023-07-18	MTA	IMPLANTABLE COLLAMER LENS (ICL)	Misfocusing; Off-Label Use	Blurred Vision	P030016	NA	1	Event Description: THE REPORTER INDICATED THAT A 12.6MM VICMO12.6 IMPLANTABLE COLLAMER LENS OF -13.50 DIOPTER WAS IMPLANTED INTO THE PATIENT'S LEFT EYE (OS) ON (B)(6) 2023. ON (B)(6) 2023 THE LENS WAS EXCHANGED FOR A TORIC LENS OF DIFFERENT POWER DUE TO REFRACTIVE SURPRISE. THE EXCHANGE RESOLVED THE PROBLEM. CAUSE OF EVENT WAS UNKNOWN. Manufacturer Narrative: H3 - DEVICE EVALUATION: THE LENS WAS …	Lens Exchange	Resolved
https://www.accessdata.fda.gov/scripts/cdrh/cfdocs/cfMAUDE/Detail.CFM?MDRFOI__ID=17075871&pc=MTA	2023826-2023-02258	2023-04-14	Injury	STAAR SURGICAL COMPANY	2023-06-06	MTA	IMPLANTABLE COLLAMER LENS (ICL)	Misfocusing; Off-Label Use	Blurred Vision	P030016	NA	1	Event Description: THE REPORTER INDICATED THAT THE SURGEON IMPLANTED A 12.1MM VICMO12.1; -9.5 DIOPTER IMPLANTABLE COLLAMER LENS INTO THE PATIENT'S LEFT EYE (OS) ON (B)(6)2023. THE SURGEON REPORTS THE PATIENT HAD 1D ASTIGMATISM BEFORE IMPLANTATION, BUT DUE TO THE PRICE A VICMO MODEL WAS REQUIRED. AFTER IMPLANTATION THE POSTOPERATIVE VISUAL QUALITY WAS LOWER THAN EXPLANTED. ON (B)(6)2023 THE LENS W…	Lens Exchange	Resolved
https://www.accessdata.fda.gov/scripts/cdrh/cfdocs/cfMAUDE/Detail.CFM?MDRFOI__ID=18212758&pc=MTA	2023826-2023-05372	2023-06-06	Injury	STAAR SURGICAL COMPANY	2023-11-27	MTA	IMPLANTABLE COLLAMER LENS (ICL)	Misfocusing; Off-Label Use	Blurred Vision	P030016	NA	1	Event Description: THE REPORTER INDICATED THAT THE SURGEON IMPLANTED A 13.2MM VICMO13.2; -12.5 DIOPTER IMPLANTABLE COLLAMER LENS INTO THE PATIENT'S RIGHT EYE (OD) ON (B)(6) 2023. THE PATIENT EXPERIENCED REFRACTIVE SURPRISE. ON (B)(6) 2023 THE LENS WAS EXCHANGED WITH A LONGER LENGTH AND DIFFERENT POWER LENS AND THE PROBLEM WAS RESOLVED. THE CAUSE OF THE EVENT WAS REPORTED AS UNKNOWN AND THERE WAS …	Lens Exchange	Resolved
https://www.accessdata.fda.gov/scripts/cdrh/cfdocs/cfMAUDE/Detail.CFM?MDRFOI__ID=17549360&pc=MTA	2023826-2023-03448	2023-07-11	Injury	STAAR SURGICAL COMPANY	2023-08-15	MTA	IMPLANTABLE COLLAMER LENS (ICL)	Misfocusing; Off-Label Use	Blurred Vision	P030016	NA	1	Event Description: THE REPORTER INDICATED THAT A 12.6MM, VICMO12.6, -4.5 DIOPTER, IMPLANTABLE COLLAMER LENS WAS IMPLANTED INTO THE PATIENT'S LEFT EYE (OS) ON (B)(6) 2023. ON (B)(6) 2023 THE LENS WAS REPLACED WITH A SAME SIZE , DIFFERENT POWER (SPHERE/CYLINDER/AXIS) LENS DUE TO REFRACTIVE SURPRISE. THE PROBLEM WAS RESOLVED. CAUSE OF THE EVENT IS REPORTED AS UNKNOWN. Manufacturer Narrative: DEVICE …	Lens Exchange	Resolved
https://www.accessdata.fda.gov/scripts/cdrh/cfdocs/cfMAUDE/Detail.CFM?MDRFOI__ID=18437836&pc=MTA	2023826-2024-00030	2023-07-11	Injury	STAAR SURGICAL COMPANY	2024-01-03	MTA	IMPLANTABLE COLLAMER LENS (ICL)	Misfocusing; Off-Label Use	Blurred Vision	P030016	NA	1	Event Description: THE REPORTER INDICATED THAT A 13.2MM VICMO13.2 IMPLANTABLE COLLAMER LENS OF -13.5 DIOPTER WAS IMPLANTED INTO THE PATIENT'S LEFT EYE (OS) ON (B)(6) 2023. ON (B)(6) 2023, THE LENS WAS EXCHANGED FOR A TORIC MODEL LENS DUE TO REFRACTIVE SURPRISE AND THE PROBLEM WAS RESOLVED. CAUSE OF THE EVENT IS UNKNOWN. Manufacturer Narrative: A4-A6:UNK. H6: OFF-LABEL - AGE<21. CLAIM# (B)(4).	Lens Exchange	Resolved
https://www.accessdata.fda.gov/scripts/cdrh/cfdocs/cfMAUDE/Detail.CFM?MDRFOI__ID=17778122&pc=MTA	2023826-2023-04109	2023-08-26	Injury	STAAR SURGICAL COMPANY	2023-09-19	MTA	IMPLANTABLE COLLAMER LENS (ICL)	Misfocusing; Off-Label Use	Blurred Vision	P030016	NA	1	Event Description: THE REPORTER INDICATED THAT A 13.2MM VICMO13.2 IMPLANTABLE COLLAMER LENS OF -4.00 DIOPTER WAS IMPLANTED INTO THE PATIENTS RIGHT EYE (OD) ON (B)(6) 2023. ON (B)(6) 2023 THE LENS WAS EXPLANTED DUE TO POOR VISION AND THE PROBLEM RESOLVED. CAUSE OF EVENT WAS UNKNOWN. Manufacturer Narrative: H6 - DEVICE CODE 1494: OFF-LABEL USE (OVER 45YRS OF AGE AT DATE OF IMPLANT) H6 - TYPE OF INV…	Lens Extraction	Resolved
https://www.accessdata.fda.gov/scripts/cdrh/cfdocs/cfMAUDE/Detail.CFM?MDRFOI__ID=18395378&pc=MTA	2023826-2023-05777	2023-09-16	Injury	STAAR SURGICAL COMPANY	2023-12-26	MTA	IMPLANTABLE COLLAMER LENS (ICL)	Misfocusing; Off-Label Use	Blurred Vision	P030016	NA	1	Event Description: THE REPORTER INDICATED THAT A 13.2MM VICMO 13.2 IMPLANTABLE COLLAMER LENS OF -8.50 DIOPTER WAS IMPLANTED INTO THE PATIENT'S LEFT EYE (OS) ON (B)(6) 2023. REFRACTIVE SURPRISE WAS OBSERVED. ON (B)(6) 2023 THE LENS WAS EXCHANGED FOR A SAME MODEL AND SIZE LENS WITH DIFFERENT POWER AND THE PROBLEM WAS RESOLVED. CAUSE REPORTED AS UNKNOWN. Manufacturer Narrative: H6-DEVICE CODE 1494: …	Lens Exchange	Resolved
https://www.accessdata.fda.gov/scripts/cdrh/cfdocs/cfMAUDE/Detail.CFM?MDRFOI__ID=18416672&pc=MTA	2023826-2023-05825	2023-10-31	Injury	STAAR SURGICAL COMPANY	2023-12-29	MTA	IMPLANTABLE COLLAMER LENS (ICL)	Misfocusing; Off-Label Use	Blurred Vision	P030016	NA	1	Event Description: THE REPORTER INDICATED THAT A 12.6MM VICMO12.6 IMPLANTABLE COLLAMER LENS OF -12.0 DIOPTER WAS IMPLANTED INTO THE PATIENT'S RIGHT EYE (OD) ON (B)(6) 2023. ON (B)(6) 2023 THE LENS WAS EXPLANTED DUE TO BLURRED VISION AND THE PROBLEM RESOLVED. CAUSE OF EVENT WAS UNKNOWN. Manufacturer Narrative: H6 - DEVICE CODE 1494: OFF-LABEL USE (ACD < 3.0MM). CLAIM# (B)(4).	Lens Extraction	Resolved
https://www.accessdata.fda.gov/scripts/cdrh/cfdocs/cfMAUDE/Detail.CFM?MDRFOI__ID=18416770&pc=MTA	2023826-2023-05826	2023-10-31	Injury	STAAR SURGICAL COMPANY	2023-12-29	MTA	IMPLANTABLE COLLAMER LENS (ICL)	Misfocusing; Off-Label Use	Blurred Vision	P030016	NA	1	Event Description: THE REPORTER INDICATED THAT A 12.6MM VICMO12.6 IMPLANTABLE COLLAMER LENS OF -10.50 DIOPTER WAS IMPLANTED INTO THE PATIENT'S LEFT EYE (OS) ON (B)(6) 2023. ON (B)(6) 2023 THE LENS WAS EXPLANTED DUE TO BLURRED VISION AND THE PROBLEM RESOLVED. CAUSE OF EVENT WAS UNKNOWN. Manufacturer Narrative: H6 - DEVICE CODE 1494: OFF-LABEL USE (ACD < 3.0MM). CLAIM# (B)(4).	Lens Extraction	Resolved
https://www.accessdata.fda.gov/scripts/cdrh/cfdocs/cfMAUDE/Detail.CFM?MDRFOI__ID=18525783&pc=MTA	2023826-2024-00175	2023-11-22	Injury	STAAR SURGICAL COMPANY	2024-01-17	MTA	IMPLANTABLE COLLAMER LENS (ICL)	Misfocusing; Off-Label Use	Blurred Vision	P030016	NA	1	Event Description: THE REPORTER INDICATED THAT THE SURGEON IMPLANTED A 12.1MM VICMO 12.1, -4.0 DIOPTER, IMPLANTABLE COLLAMER LENS INTO THE PATIENT'S LEFT EYE (OS) ON (B)(6)2023. ON (B)(6)2023 THE LENS WAS REPLACED WITH A TORIC LENS DUE TO REFRACTIVE SURPRISE. THE PROBLEM WAS RESOLVED. CAUSE OF THE EVENT IS REPORTED AS UNKNOWN. Manufacturer Narrative: CLAIM# (B)(4).	Lens Exchange	Resolved
https://www.accessdata.fda.gov/scripts/cdrh/cfdocs/cfMAUDE/Detail.CFM?MDRFOI__ID=18496445&pc=MTA	2023826-2024-00117	2023-11-27	Injury	STAAR SURGICAL COMPANY	2024-01-11	MTA	IMPLANTABLE COLLAMER LENS (ICL)	Misfocusing; Off-Label Use	Blurred Vision	P030016	NA	1	Event Description: THE REPORTER INDICATED THAT A 12.6MM VICMO12.6 IMPLANTABLE COLLAMER LENS OF -6.00 DIOPTER WAS IMPLANTED INTO THE PATIENT'S LEFT EYE (OS) ON (B)(6) 2023. ON (B)(6) 2023 THE LENS WAS EXCHANGED FOR A DIFFERENT POWER LENS DUE TO REFRACTIVE SURPRISE. THE EXCHANGE RESOLVED THE PROBLEM. CAUSE OF EVENT WAS UNKNOWN. Manufacturer Narrative: H6 - DEVICE CODE 1494: OFF-LABEL USE (ACD < 3.0…	Lens Exchange	Resolved
https://www.accessdata.fda.gov/scripts/cdrh/cfdocs/cfMAUDE/Detail.CFM?MDRFOI__ID=17393777&pc=MTA	2023826-2023-03125	NA	Malfunction	STAAR SURGICAL COMPANY	2023-07-25 04:00:00	MTA	IMPLANTABLE COLLAMER LENS (ICL)	Misfocusing; Off-Label Use	Blurred Vision	P030016	NA	1	Event Description: THE REPORTER INDICATED THAT THE SURGEON IMPLANTED A 12.6MM VICM5 12.6 IMPLANTABLE COLLAMER LENS OF A -10.0 DIOPTER AS A REPLACEMENT LENS INTO THE RIGHT EYE (OD) OF A PATIENT WITH PRE-EXISTING PERILIMABAL ON (B)(6) 2023, DUE TO BLURRED VISION AND "OD HORIZONTAL JUXTAPOSED METAMORPHIC EYE." CAUSE OF THE EVENT IS UNKNOWN AND THE PROBLEM WAS NOT RESOLVED. REPORTEDLY, "MIOCHOL WAS O…	Lens Exchange	Not_Resolved
https://www.accessdata.fda.gov/scripts/cdrh/cfdocs/cfMAUDE/Detail.CFM?MDRFOI__ID=9869317&pc=MTA	2023826-2020-00627	2019-12-18	Malfunction	STAAR SURGICAL COMPANY	2020-03-23	MTA	IMPLANTABLE COLLAMER LENS	Misfocusing; Off-Label Use; Improper or Incorrect Procedure or Method	Blurred Vision	NA	NA	1	Event Description: THE REPORTER INDICATED THAT THE SURGEON IMPLANTED A 12.6MM VICMO12.6 IMPLANTABLE COLLAMER LENS, -18.0 DIOPTER, INTO THE PATIENT'S LEFT EYE (OS) ON (B)(6) 2019. THE SURGEON REPORTS REFRACTIVE SURPRISE AND BLURRED VISION. REPORTEDLY, THE LENS REMAINS IMPLANTED. THE CAUSE OF THE EVENT IS REPORTED AS USER ERROR; AN ACD VALUE OF 3.2MM WAS USED INSTEAD OF THE ACTUAL ACD VALUE OF 2.53…	Lens Retention	Unknown
https://www.accessdata.fda.gov/scripts/cdrh/cfdocs/cfMAUDE/Detail.CFM?MDRFOI__ID=11721909&pc=MTA	2023826-2021-01028	2018-01-03	Injury	STAAR SURGICAL COMPANY	2021-04-25	MTA	IMPLANTABLE COLLAMER LENS (ICL)	Misfocusing; Off-Label Use; Inadequacy of Device Shape and/or Size	Blurred Vision	N/A	NA	1	Event Description: THE REPORTER INDICATED THAT THE SURGEON IMPLANTED A 13.2MM VICMO13.2, -07.50 DIOPTER, IMPLANTABLE COLLAMER LENS INTO THE PATIENT'S LEFT EYE (OS) ON (B)(6) 2017. THE LENS WAS EXCHANGED WITH A SHORTER LENGTH LENS DUE TO EXCESSIVE VAULT AND REFRACTIVE SURPRISE ON (B)(6) 2018. THIS RESOLVED THE PROBLEM. CAUSE OF THE EVENT IS REPORTED AS UNKNOWN. Manufacturer Narrative: WEIGHT - UNK…	Lens Exchange	Resolved
https://www.accessdata.fda.gov/scripts/cdrh/cfdocs/cfMAUDE/Detail.CFM?MDRFOI__ID=11773680&pc=MTA	2023826-2021-01383	2020-08-17	Injury	STAAR SURGICAL COMPANY	2021-05-04	MTA	IMPLANTABLE COLLAMER LENS (ICL)	Misfocusing; Off-Label Use; Inadequacy of Device Shape and/or Size	Blurred Vision	NA	NA	1	Event Description: THE REPORTER INDICATED THAT A 12.1MM, VICMO12.1, -3.00 DIOPTER, IMPLANTABLE COLLAMER LENS WAS IMPLANTED INTO THE PATIENTS RIGHT EYE (OD) ON (B)(6) 2020. ON (B)(6) 2020 THE LENS WAS EXCHANGED FOR A LONGER LENGTH TORIC LENS DUE TO LOW VAULT AND REFRACTIVE SURPRISE. THIS EXCHANGE RESOLVED THE PROBLEM. CAUSE OF EVENT WAS UNKNOWN. Manufacturer Narrative: H3: DEVICE EVALUATION - LENS…	Lens Exchange	Resolved
https://www.accessdata.fda.gov/scripts/cdrh/cfdocs/cfMAUDE/Detail.CFM?MDRFOI__ID=11683469&pc=MTA	2023826-2021-01068	2020-10-19	Injury	STAAR SURGICAL COMPANY	2021-04-18	MTA	IMPLANTABLE COLLAMER LENS (ICL)	Misfocusing; Off-Label Use; Inadequacy of Device Shape and/or Size	Blurred Vision	NA	NA	1	Event Description: THE REPORTER INDICATED THAT A 13.2MM, VICMO13.2, -16.0 DIOPTER, IMPLANTABLE COLLAMER LENS WAS IMPLANTED INTO THE PATIENTS RIGHT EYE (OD) ON (B)(6) 2020. ON (B)(6) 2020 THE LENS WAS EXCHANGED FOR A SHORTER LENGTH DIFFERENT DIOPTER LENS DUE TO EXCESSIVE VAULT AND REFRACTIVE SURPRISE. THIS EXCHANGE RESOLVED THE PROBLEM, CAUSE OF EVENT WAS REPORTED AS UNKNOWN. Manufacturer Narrativ…	Lens Exchange	Resolved
https://www.accessdata.fda.gov/scripts/cdrh/cfdocs/cfMAUDE/Detail.CFM?MDRFOI__ID=14190874&pc=MTA	2023826-2022-01297	2020-10-22	Injury	STAAR SURGICAL COMPANY	2022-04-22	MTA	IMPLANTABLE COLLAMER LENS	Misfocusing; Off-Label Use; Inadequacy of Device Shape and/or Size	Blurred Vision	NA	NA	1	Event Description: THE REPORTER INDICATED THAT THE SURGEON IMPLANTED A 12.1MM VICMO12.1 IMPLANTABLE COLLAMER LENS -7.0 DIOPTER INTO THE PATIENT'S LEFT EYE (OS) ON (B)(6) 2020. ON (B)(6) 2021 THE LENS WAS EXCHANGED WITH A LONGER LENS DUE TO LOW VAULT, BLURRED VISION, AND REFRACTIVE SURPRISE. THE PROBLEM WAS RESOLVED. THE CAUSE OF THE EVENT IS REPORTED AS UNKNOWN. Manufacturer Narrative: H3: DEVICE…	Lens Exchange	Resolved
https://www.accessdata.fda.gov/scripts/cdrh/cfdocs/cfMAUDE/Detail.CFM?MDRFOI__ID=14190879&pc=MTA	2023826-2022-01296	2020-10-22	Injury	STAAR SURGICAL COMPANY	2022-04-22	MTA	IMPLANTABLE COLLAMER LENS	Misfocusing; Off-Label Use; Inadequacy of Device Shape and/or Size	Blurred Vision	NA	NA	1	Event Description: THE REPORTER INDICATED THAT THE SURGEON IMPLANTED A 12.1MM VICMO12.1 IMPLANTABLE COLLAMER LENS -8.0 DIOPTER INTO THE PATIENT'S RIGHT EYE (OD) ON (B)(6) 2020. ON (B)(6) 2021 THE LENS WAS EXCHANGED WITH A LONGER LENS DUE TO LOW VAULT AND REFRACTIVE SURPRISE. THE PROBLEM WAS RESOLVED. THE CAUSE OF THE EVENT IS REPORTED AS UNKNOWN. Manufacturer Narrative: WEIGHT:UNKNOWN, ETHINICITY…	Lens Exchange	Resolved
https://www.accessdata.fda.gov/scripts/cdrh/cfdocs/cfMAUDE/Detail.CFM?MDRFOI__ID=12009098&pc=MTA	2023826-2021-01886	2021-03-24	Injury	STAAR SURGICAL COMPANY	2021-06-16	MTA	IMPLANTABLE COLLAMER LENS (ICL)	Misfocusing; Off-Label Use; Inadequacy of Device Shape and/or Size	Blurred Vision	N/A	NA	1	Event Description: THE REPORTER INDICATED THAT THE SURGEON IMPLANTED A 13.2MM VICMO13.2, -03.50 DIOPTER, IMPLANTABLE COLLAMER LENS INTO THE PATIENT'S LEFT EYE (OS) ON (B)(6) 2021. DUE TO REFRACTIVE SURPRISE AND EXCESSIVE VAULT THE LENS WAS REMOVED ON (B)(6) 2021. A SHORTER LENGTH LENS WAS IMPLANTED IN A SECOND SURGERY ON (B)(6) 2021. THIS RESOLVED THE PROBLEM. CAUSE OF THE EVENT IS REPORTED AS UN…	Lens Exchange	Resolved
https://www.accessdata.fda.gov/scripts/cdrh/cfdocs/cfMAUDE/Detail.CFM?MDRFOI__ID=13459227&pc=MTA	2023826-2022-00384	2021-07-07	Injury	STAAR SURGICAL COMPANY	2022-02-04	MTA	IMPLANTABLE COLLAMER LENS (ICL)	Misfocusing; Off-Label Use; Inadequacy of Device Shape and/or Size	Blurred Vision	NA	NA	1	Event Description: THE REPORTER INDICATED THE SURGEON IMPLANTED A 12.1MM VICMO12.1 IMPLANTABLE COLLAMER LENS, -7.0 DIOPTER INTO THE PATIENT'S LEFT EYE (OS) ON (B)(6) 2021. ON (B)(6) 2021 THE LENS WAS EXCHANGED WITH A LONGER LENS DUE TO LOW VAULT AND REFRACTIVE SURPRISE AND THE PROBLEM WAS RESOLVED. THE CAUSE OF THE EVENT IS REPORTED AS UNKNOWN. Manufacturer Narrative: H3 - DEVICE EVALUATION: THE …	Lens Exchange	Resolved
https://www.accessdata.fda.gov/scripts/cdrh/cfdocs/cfMAUDE/Detail.CFM?MDRFOI__ID=12921591&pc=MTA	2023826-2021-04632	2021-07-12	Injury	STAAR SURGICAL COMPANY	2021-12-02	MTA	IMPLANTABLE COLLAMER LENS (ICL)	Misfocusing; Off-Label Use; Inadequacy of Device Shape and/or Size	Blurred Vision	NA	NA	1	Event Description: THE REPORTER INDICATED THAT THE SURGEON IMPLANTED A 12.6MM VICM5_12.6; -7 DIOPTER IMPLANTABLE COLLAMER LENS INTO THE PATIENT'S RIGHT EYE (OD) ON (B)(6) 2021. ON THE SAME DAY IN A SEPARATE SURGERY THE LENS WAS EXCHANGED WITH A SHORTER LENGTH LENS DUE TO EXCESSIVE VAULTING AND REFRACTIVE CHANGE OVER TIME. THIS RESOLVED THE PROBLEM. THE CAUSE OF THE EVENT WAS REPORTED AS UNKNOWN. …	Lens Exchange	Resolved
https://www.accessdata.fda.gov/scripts/cdrh/cfdocs/cfMAUDE/Detail.CFM?MDRFOI__ID=16075679&pc=MTA	2023826-2022-04744	2022-01-26	Injury	STAAR SURGICAL COMPANY	2022-12-29	MTA	IMPLANTABLE COLLAMER LENS (ICL)	Misfocusing; Off-Label Use; Inadequacy of Device Shape and/or Size	Blurred Vision	NA	NA	1	Event Description: THE REPORTER INDICATED THAT A 12.6MM VICM512.6 IMPLANTABLE COLLAMER LENS OF A -8.0 DIOPTER, WAS IMPLANTED INTO THE RIGHT EYE (OD) OF A PATIENT WITH PRE-EXISTING PROGRESSIVE MYOPIA ON (B)(6) 2022. ON (B)(6) 2022, THE LENS WAS EXCHANGED FOR A SMALLER LENGTH LENS. REPORTEDLY, "LENS TOO BIG. SURGEON PREFERENCE CHANGE." THE PROBLEM WAS NOT RESOLVED. THE REPORTER INDICATED THAT THE D…	Lens Exchange	Not_Resolved
https://www.accessdata.fda.gov/scripts/cdrh/cfdocs/cfMAUDE/Detail.CFM?MDRFOI__ID=17592023&pc=MTA	2023826-2023-03623	2022-05-04	Injury	STAAR SURGICAL COMPANY	2023-08-21	MTA	IMPLANTABLE COLLAMER LENS (ICL)	Misfocusing; Off-Label Use; Inadequacy of Device Shape and/or Size	Blurred Vision	P030016	NA	1	Event Description: THE REPORTER INDICATED THAT A 12.6MM VICMO12.6 IMPLANTABLE COLLAMER LENS OF -7.5 DIOPTER WAS IMPLANTED INTO THE PATIENT'S RIGHT EYE (OD) ON (B)(6) 2022. ON (B)(6) 2023, THE LENS WAS EXCHANGED FOR A LONGER LENGTH LENS DUE TO EXCESSIVE VAULT AND REFRACTIVE SURPRISE. THE PROBLEM WAS RESOLVED. THE CAUSE OF THE EVENT IS UNKNOWN. Manufacturer Narrative: H6: OFF-LABEL USE ACD<3.0. CLA…	Lens Exchange	Resolved
https://www.accessdata.fda.gov/scripts/cdrh/cfdocs/cfMAUDE/Detail.CFM?MDRFOI__ID=16075680&pc=MTA	2023826-2022-04745	2022-05-20	Injury	STAAR SURGICAL COMPANY	2022-12-29	MTA	IMPLANTABLE COLLAMER LENS (ICL)	Misfocusing; Off-Label Use; Inadequacy of Device Shape and/or Size	Blurred Vision	NA	NA	1	Event Description: THE REPORTER INDICATED THAT A 12.1MM VICM512.1 IMPLANTABLE COLLAMER LENS WITH A -8.0 DIOPTER, WAS IMPLANTED AS A REPLACEMENT INTO THE RIGHT EYE (OD) OF A PATIENT WITH PRE-EXISTING PROGRESSIVE MYOPIA ON (B)(6) 2022. REPORTEDLY, "LENS TOO BIG. SURGEON PREFERENCE CHANGE." THE PROBLEM WAS NOT RESOLVED. THE REPORTER INDICATED THAT THE DEVICE FAILED TO PERFORM AS INTENDED. "BLURRY VI…	Lens Extraction	Resolved
https://www.accessdata.fda.gov/scripts/cdrh/cfdocs/cfMAUDE/Detail.CFM?MDRFOI__ID=15810623&pc=MTA	2023826-2022-03960	2022-09-18	Injury	STAAR SURGICAL COMPANY	2022-11-16	MTA	IMPLANTABLE COLLAMER LENS (ICL)	Misfocusing; Off-Label Use; Inadequacy of Device Shape and/or Size	Blurred Vision	P030016	NA	1	Event Description: THE REPORTER INDICATED THAT A 12.1MM VICMO12.1 IMPLANTABLE COLLAMER LENS OF -9.0 DIOPTER WAS IMPLANTED INTO THE PATIENT'S RIGHT EYE (OD) ON (B)(6) 2022. ON (B)(6) 2022, THE LENS WAS EXCHANGED FOR A TORIC MODEL, LONGER LENGTH LENS DUE TO LOW VAULT WITHOUT ROTATION AND REFRACTIVE SURPRISE. THE PROBLEM WAS RESOLVED. CAUSE OF THE EVENT IS OTHER. Manufacturer Narrative: (B)(4). OFF …	Lens Exchange	Resolved
https://www.accessdata.fda.gov/scripts/cdrh/cfdocs/cfMAUDE/Detail.CFM?MDRFOI__ID=16787278&pc=MTA	2023826-2023-01468	2023-03-24	Injury	STAAR SURGICAL COMPANY	2023-04-21	MTA	IMPLANTABLE COLLAMER LENS (ICL)	Misfocusing; Off-Label Use; Inadequacy of Device Shape and/or Size	Blurred Vision	P030016	NA	1	Event Description: THE REPORTER INDICATED THAT THE SURGEON IMPLANTED A 12.6MM VICM5_12.6; -3.50 DIOPTER IMPLANTABLE COLLAMER LENS INTO THE PATIENT'S RIGHT EYE (OD) ON (B)(6) 2023. THE PATIENT EXPERIENCED EXCESSIVE VAULTING AND REFRACTIVE SURPRISE. LENS REMAINS IMPLANTED. THE CAUSE OF THE EVENT WAS REPORTED AS UNKNOWN. IF ADDITIONAL INFORMATION IS RECEIVED A SUPPLEMENTAL MEDWATCH REPORT WILL BE SU…	Lens Exchange	Resolved
https://www.accessdata.fda.gov/scripts/cdrh/cfdocs/cfMAUDE/Detail.CFM?MDRFOI__ID=17569168&pc=MTA	2023826-2023-03513	2023-06-22	Injury	STAAR SURGICAL COMPANY	2023-08-17	MTA	IMPLANTABLE COLLAMER LENS (ICL)	Misfocusing; Off-Label Use; Inadequacy of Device Shape and/or Size	Blurred Vision	P030016	NA	1	Event Description: THE REPORTER INDICATED THAT A 12.6MM VICMO12.6 IMPLANTABLE COLLAMER LENS OF -4.0 DIOPTER WAS IMPLANTED INTO THE PATIENT'S LEFT EYE (OS) ON (B)(6) 2022. ON (B)(6) 2023, THE LENS WAS EXCHANGED FOR A LONGER LENGTH LENS DUE TO EXCESSIVE VAULT AND REFRACTIVE SUPRISE. THE PROBLEM WAS RESOLVED. THE CAUSE OF THE EVENT IS UNKNOWN. Manufacturer Narrative: H6: OFF-LABEL USE ACD<3.0. CLAIM…	Lens Exchange	Resolved
https://www.accessdata.fda.gov/scripts/cdrh/cfdocs/cfMAUDE/Detail.CFM?MDRFOI__ID=17999784&pc=MTA	2023826-2023-04729	2023-09-04	Injury	STAAR SURGICAL COMPANY	2023-10-24	MTA	IMPLANTABLE COLLAMER LENS (ICL)	Misfocusing; Off-Label Use; Inadequacy of Device Shape and/or Size	Blurred Vision	P030016	NA	1	Event Description: THE REPORTER INDICATED THAT A 12.6MM VICMO12.6 IMPLANTABLE COLLAMER LENS OF -10.0 DIOPTER WAS IMPLANTED INTO THE PATIENT'S LEFT EYE (OS) ON (B)(6) 2023. ON (B)(6) 2023, THE LENS WAS EXCHANGED FOR A LONGER LENGTH LENS DUE TO LOW VAULT AND REFRACTIVE SURPRISE. THE PROBLEM WAS RESOLVED. THE CAUSE OF THE EVENT IS UNKNOWN. Manufacturer Narrative: A4-A6:UNK. H6: OFF-LABEL USE ACD<3.0…	Lens Exchange	Resolved
https://www.accessdata.fda.gov/scripts/cdrh/cfdocs/cfMAUDE/Detail.CFM?MDRFOI__ID=17845437&pc=MTA	2023826-2023-04238	2022-05-04	Malfunction	STAAR SURGICAL COMPANY	2023-09-29	MTA	IMPLANTABLE COLLAMER LENS (ICL)	Misfocusing; Off-Label Use; Inadequacy of Device Shape and/or Size; No Apparent Adverse Event	Blurred Vision	P030016	NA	1	Event Description: THE REPORTER INDICATED THAT A 13.2MM VICMO13.2 IMPLANTABLE COLLAMER LENS OF -6.0 DIOPTER WAS IMPLANTED AS A REPLACEMENT INTO THE PATIENT'S RIGHT EYE (OD) ON (B)(6) 2023 DUE TO LOW VAULT AND REFRACTIVE SURPRISE. THE PROBLEM WAS NOT RESOLVED. Manufacturer Narrative: A4-A6:UNK. H6: OFF-LABEL USE ACD<3.0. CLAIM# (B)(4).	Unknown	Not_Resolved
https://www.accessdata.fda.gov/scripts/cdrh/cfdocs/cfMAUDE/Detail.CFM?MDRFOI__ID=15611640&pc=MTA	2023826-2022-03644	2022-04-08	Injury	STAAR SURGICAL COMPANY	2022-10-14	MTA	IMPLANTABLE COLLAMER LENS (ICL)	Misfocusing; Off-Label Use; Patient-Device Incompatibility	Blurred Vision	P030016	NA	1	Event Description: THE REPORTER INDICATED THAT THE SURGEON IMPLANTED A 13.2MM VICMO13.2; -5.5 DIOPTER IMPLANTABLE COLLAMER LENS INTO THE PATIENT'S LEFT EYE (OS) ON (B)(6) 2022. THE PATIENT EXPERIENCED REFRACTIVE SURPRISE. ON (B)(6) 2022 THE LENS WAS EXCHANGED WITH A SAME LENGTH/MODEL LENS BUT DIFFERENT POWER AND THE PROBLEM WAS RESOLVED. THE CAUSE OF THE EVENT WAS REPORTED AS A PATIENT RELATED FA…	Lens Exchange	Resolved
https://www.accessdata.fda.gov/scripts/cdrh/cfdocs/cfMAUDE/Detail.CFM?MDRFOI__ID=14598566&pc=MTA	2023826-2022-01744	NA	Injury	STAAR SURGICAL COMPANY	2022-06-03 04:00:00	MTA	IMPLANTABLE COLLAMER LENS (ICL)	Misfocusing; Off-Label Use; Patient-Device Incompatibility	Blurred Vision	P030016	NA	1	Event Description: THE REPORTER INDICATED THAT A 13.2MM VICM5_13.2 IMPLANTABLE COLLAMER LENS OF -1.00 DIOPTER WAS IMPLANTED INTO THE PATIENT'S RIGHT EYE (OD) ON (B)(6) 2021. REFRACTIVE CHANGE OVERTIME AND ASTIGMATISM POST-SURGERY WAS REPORTED. ON (B)(6) 2022 THE LENS WAS EXCHANGED WITH A NEW MODEL LENS OF DIFFERENT DIOPTER. THE EXCHANGE RESOLVED THE PROBLEM. CAUSE IS REPORTED AS PATIENT-RELATED F…	Lens Exchange	Resolved
https://www.accessdata.fda.gov/scripts/cdrh/cfdocs/cfMAUDE/Detail.CFM?MDRFOI__ID=12178423&pc=MTA	2023826-2021-02627	2021-02-07	Injury	STAAR SURGICAL COMPANY	2021-07-15	MTA	IMPLANTABLE COLLAMER LENS (ICL)	Misfocusing; Off-Label Use; Unintended Movement	Blurred Vision	NA	NA	1	Event Description: THE REPORTER INDICATED THE SURGEON IMPLANTED A 12.6MM VICMO12.6 IMPLANTABLE COLLAMER LENS, -15.00 DIOPTER, IN THE PATIENTS LEFT EYE (OS) ON (B)(6) 2021. THE LENS WAS REPORTED AS HAVING BEEN IMPLANTED UPSIDE DOWN AND PATIENT COMPLAINED OF BLURRED VISON. VISUAL ACUITY WAS POOR. THE LENS REMAINED IMPLANTED. THE CAUSE OF THE EVENT WAS DUE TO USER ERROR. Manufacturer Narrative: ADDI…	Lens Retention	Unknown
https://www.accessdata.fda.gov/scripts/cdrh/cfdocs/cfMAUDE/Detail.CFM?MDRFOI__ID=16865569&pc=MTA	2023826-2023-01626	NA	Injury	STAAR SURGICAL COMPANY	2023-05-03 04:00:00	MTA	IMPLANTABLE COLLAMER LENS (ICL)	Misfocusing; Optical Problem	Blurred Vision	N/A	NA	1	Event Description: THE REPORTER INDICATED THAT A 12.6MM VICM612.6 IMPLANTABLE COLLAMER LENS OF A -6.5 DIOPTER WAS IMPLANTED IN THE PATIENT'S RIGHT EYE (OD) ON (B)(6) 2022. ON (B)(6) 2023, THE LENS WAS REMOVED AND A TORIC LENS WAS IMPLANTED DUE TO REFRACTIVE SUPRISE, REFRACTIVE CHANGE OVER TIME, GLARES/HALOS, AND BLURRED VISION. CAUSE OF THE EVENT IS UNKNOWN. THE PROBLEM WAS RESOLVED. REPORTEDLY, …	Lens Exchange	Resolved
https://www.accessdata.fda.gov/scripts/cdrh/cfdocs/cfMAUDE/Detail.CFM?MDRFOI__ID=11135976&pc=MTA	2023826-2021-00042	2020-11-05	Injury	STAAR SURGICAL COMPANY	2021-01-07	MTA	IMPLANTABLE COLLAMER LENS (ICL)	Misfocusing; Patient-Device Incompatibility	Blurred Vision	N/A	NA	1	Event Description: THE REPORTER INDICATED THE SURGEON IMPLANTED A 13.2MM VICMO13.2 IMPLANTABLE COLLAMER LENS, DIOPTER -7.5 INTO THE PATIENT'S LEFT EYE (OS) ON (B)(6) 2020. ON (B)(6) 2020 THE LENS WAS EXCHANGED WITH A SAME LENGTH, DIFFERENT MODEL LENS DUE TO BLURRED VISION. THE PROBLEM WAS RESOLVED. THE CAUSE OF THE EVENT IS REPORTED AS A PATIENT-RELATED FACTOR. Manufacturer Narrative: H3- DEVICE …	Lens Exchange	Resolved
https://www.accessdata.fda.gov/scripts/cdrh/cfdocs/cfMAUDE/Detail.CFM?MDRFOI__ID=18187759&pc=MTA	2023826-2023-05236	NA	Malfunction	STAAR SURGICAL COMPANY	2023-11-21 05:00:00	MTA	IMPLANTABLE COLLAMER LENS (ICL)	No Apparent Adverse Event	Blurred Vision	P030016	NA	1	Event Description: THE REPORTER INDICATED THAT A 12.6MM VICM5 12.6 IMPLANTABLE COLLAMER LENS OF -12.00 DIOPTER WAS IMPLANTED INTO THE PATIENT'S EYE ON AN UNKNOWN DATE. PATIENT IS HYPEROPIC +25 +.50 X086 = 20/15. UNCORRECTED VA IS 20/25. THE LENS REMAINS IMPLANTED. NO FURTHER INFORMATION HAS BEEN PROVIDED. IF ADDITIONAL INFORMATION IS RECEIVED A SUPPLEMENTAL MEDWATCH REPORT WILL BE SUBMITTED. Manu…	Unknown	Unknown
https://www.accessdata.fda.gov/scripts/cdrh/cfdocs/cfMAUDE/Detail.CFM?MDRFOI__ID=12523962&pc=MTA	2023826-2021-03725	2021-06-24	Injury	STAAR SURGICAL COMPANY	2021-09-23	MTA	IMPLANTABLE COLLAMER LENS (ICL)	Off-Label Use; Inadequacy of Device Shape and/or Size	Blurred Vision	NA	NA	1	Event Description: THE REPORTER INDICATED THAT A 12.1MM, VICMO12.1, -7.5 DIOPTER, IMPLANTABLE COLLAMER LENS WAS IMPLANTED INTO THE PATIENTS LEFT EYE (OS) ON (B)(6) 2021. ON (B)(6) 2021 THE LENS WAS EXCHANGED FOR A LONGER LENGTH LENS DUE TO LOW VAULT AND REFRACTIVE SURPRISE. THIS EXCHANGE RESOLVED THE PROBLEM. CAUSE OF EVENT UNKNOWN. Manufacturer Narrative: H3- DEVICE EVALUATION: LENS WAS RETURNED…	Lens Exchange	Resolved
https://www.accessdata.fda.gov/scripts/cdrh/cfdocs/cfMAUDE/Detail.CFM?MDRFOI__ID=18560960&pc=MTA	2023826-2024-00365	2023-11-15	Malfunction	STAAR SURGICAL COMPANY	2024-01-23	MTA	IMPLANTABLE COLLAMER LENS (ICL)	Inadequacy of Device Shape and/or Size	Blurred Vision; Appropriate Clinical Signs, Symptoms, Conditions Term / Code Not Available	P030016	NA	1	Event Description: THE REPORTER INDICATED THAT A 12.6MM, VICMO12.6, -7.50 DIOPTER, IMPLANTABLE COLLAMER LENS WAS IMPLANTED INTO THE PATIENTS LEFT EYE (OS) ON (B)(6) 2023. THE PATIENT EXPERIENCED EXCESSIVE VAULT, TRANSIENT LOSS OF BCVA (BLURRY VISION WITH SHADOW) AND SIGNIFICANT REDUCTION OF IRIDOCORNEAL ANGLES. LENS REMAINS IMPLANTED. ADDITIONAL INFORMATION HAS BEEN REQUESTED BUT NONE HAS BEEN FO…	Lens Retention	Unknown
https://www.accessdata.fda.gov/scripts/cdrh/cfdocs/cfMAUDE/Detail.CFM?MDRFOI__ID=10956213&pc=MTA	2023826-2020-02850	2020-10-22	Injury	STAAR SURGICAL COMPANY	2020-12-06	MTA	IMPLANTABLE COLLAMER LENS (ICL)	Misfocusing	Blurred Vision; Appropriate Clinical Signs, Symptoms, Conditions Term / Code Not Available	NA	NA	1	Event Description: THE REPORTER INDICATED THAT A 13.2MM,VICMO 13.2, -17.50 DIOPTER,IMPLANTABLE COLLAMER LENS WAS IMPLANTED INTO THE PATIENTS RIGHT EYE (OD) ON (B)(6) 2020. ON (B)(6) 2020 THE LENS WAS EXPLANTED DUE TO REFRACTIVE SURPRISE. IT REPORTED THAT THE PROBLEM RESOLVED, PATIENT IS OKAY. THE REPORTER INDICATED " THERE WAS AN IRIS PROLAPS DURING EXPLANTATION OF THE ICL. THE SURGEON DECIDED TO…	Lens Extraction	Resolved
https://www.accessdata.fda.gov/scripts/cdrh/cfdocs/cfMAUDE/Detail.CFM?MDRFOI__ID=11372191&pc=MTA	2023826-2021-00442	2021-02-03	Malfunction	STAAR SURGICAL COMPANY	2021-02-24	MTA	IMPLANTABLE COLLAMER LENS (ICL)	Misfocusing	Blurred Vision; Appropriate Clinical Signs, Symptoms, Conditions Term / Code Not Available	N/A	NA	1	Event Description: THE REPORTER INDICATED THAT A 13.2MM, VICM5 13.2, -11.00 DIOPTER, IMPLANTABLE COLLAMER LENS WAS IMPLANTED INTO THE PATIENT'S RIGHT EYE (OD) ON (B)(6) 2021. SIGNIFICANT REDUCTION OF IRIDO-CORNEAL ANGELS AND EXCESSIVE VAULT WERE OBSERVED, THE LENS REMAINS IMPLANTED. CAUSE OF THE EVENT IS REPORTED AS UNKNOWN. REPORTEDLY, ELEVATED IOP (26MMHG). CAUSE OF THE EVENT IS REPORTED AS UNK…	Lens Retention	Unknown
https://www.accessdata.fda.gov/scripts/cdrh/cfdocs/cfMAUDE/Detail.CFM?MDRFOI__ID=11939017&pc=MTA	2023826-2021-01668	2021-04-02	Injury	STAAR SURGICAL COMPANY	2021-06-04	MTA	IMPLANTABLE COLLAMER LENS (ICL)	Misfocusing	Blurred Vision; Appropriate Clinical Signs, Symptoms, Conditions Term / Code Not Available	N/A	NA	1	Event Description: THE REPORTER INDICATED THAT THE SURGEON IMPLANTED A 12.6MM VICM5_12.6, -12.00 DIOPTER , IMPLANTABLE COLLAMER LENS INTO THE PATIENT'S RIGHT EYE (OD) ON (B)(6) 2021. ON (B)(6) 2021 THE LENS WAS EXPLANTED DUE TO PIGMENT DISPERSION, BLURRED VISION AND HYPHEMA, INFLAMMATION. THIS RESOLVED THE PROBLEM. REPORTEDLY, AC BLEEDING WAS REMOVED BY IRRIGATION. INFLAMMATION WAS TREATED BY MED…	Lens Extraction + Secondary Operation	Resolved
https://www.accessdata.fda.gov/scripts/cdrh/cfdocs/cfMAUDE/Detail.CFM?MDRFOI__ID=13944355&pc=MTA	2023826-2022-01026	2022-01-18	Injury	STAAR SURGICAL COMPANY	2022-03-29	MTA	IMPLANTABLE COLLAMER LENS (ICL)	Misfocusing	Blurred Vision; Appropriate Clinical Signs, Symptoms, Conditions Term / Code Not Available	NA	NA	1	Event Description: THE REPORTER INDICATED THAT THE SURGEON IMPLANTED 13.2MM VICM5_13.2; -9.50 DIOPTER IMPLANTABLE COLLAMER LENS INTO THE PATIENT'S RIGHT EYE (OD) ON (B)(6) 2022. THE PATIENT EXPERIENCED REFRACTIVE SURPRISE AS WELL AS HYPEROPIA. ON (B)(6) 2022 THE LENS WAS EXPLANTED AND LATER ON THE SAME DATE IT WAS NOTED A REPLACEMENT LENS OF SHORTER LENGTH AND DIFFERENT POWER WAS IMPLANTED. THIS …	Lens Exchange	Not_Resolved
https://www.accessdata.fda.gov/scripts/cdrh/cfdocs/cfMAUDE/Detail.CFM?MDRFOI__ID=17802053&pc=MTA	2023826-2023-04080	2023-04-11	Injury	STAAR SURGICAL COMPANY	2023-09-22	MTA	IMPLANTABLE COLLAMER LENS (ICL)	Misfocusing	Blurred Vision; Appropriate Clinical Signs, Symptoms, Conditions Term / Code Not Available	P030016	NA	1	Event Description: THE REPORTER INDICATED THE SURGEON IMPLANTED A 13.2MM VICM5_13.2 IMPLANTABLE COLLAMER LENS, -03.50 DIOPTER, INTO THE PATIENTS LEFT EYE (OS) ON (B)(6) 2022. THE LENS WAS EXPLANTED ON (B)(6) 2023 DUE TO PATIENT EXPERIENCED UNREACTIVE (FIXED) PUPIL, BLURRED VISION AND IRIS ATROPHY. POST-OP, THE PUPIL IS STILL LARGE. Manufacturer Narrative: A4: UNK. A5: UNK . A6: UNK . H6: HEALTH I…	Lens Extraction	Not_Resolved
https://www.accessdata.fda.gov/scripts/cdrh/cfdocs/cfMAUDE/Detail.CFM?MDRFOI__ID=14376862&pc=MTA	2023826-2022-01317	NA	Injury	STAAR SURGICAL COMPANY	2022-05-12 04:00:00	MTA	IMPLANTABLE COLLAMER LENS (ICL)	Misfocusing	Blurred Vision; Appropriate Clinical Signs, Symptoms, Conditions Term / Code Not Available	NA	NA	1	Event Description: THE REPORTER INDICATED THAT A 12.6MM, VICMO12.6 IMPLANTABLE COLLAMER LENS OF -11.50 DIOPTER WAS IMPLANTED INTO THE PATIENT'S RIGHT EYE (OD) ON (B)(6) 2022. ON (B)(6) 2022 THE LENS WAS EXCHANGED WITH A DIFFERENT DIOPTER LENS DUE TO REFRACTIVE SURPRISE AND DIZZINESS. THE EXCHANGE RESOLVED THE PROBLEM. CAUSE IS REPORTED AS UNKNOWN. Manufacturer Narrative: H3- DEVICE EVALUATION: LE…	Lens Exchange	Resolved
https://www.accessdata.fda.gov/scripts/cdrh/cfdocs/cfMAUDE/Detail.CFM?MDRFOI__ID=15332386&pc=MTA	2023826-2022-03005	NA	Injury	STAAR SURGICAL COMPANY	2022-08-31 04:00:00	MTA	IMPLANTABLE COLLAMER LENS (ICL)	Misfocusing	Blurred Vision; Appropriate Clinical Signs, Symptoms, Conditions Term / Code Not Available	P030016	NA	1	Event Description: THE REPORTER INDICATED THAT THE SURGEON IMPLANTED A 12.1MM VICM6_12.1; -04.50 DIOPTER IMPLANTABLE COLLAMER LENS INTO THE PATIENT'S RIGHT EYE (OD) ON (B)(6) 2021. IT WAS INDICATED THAT LASER VISION CORRECTION WAS PERFORMED ON (B)(6) 2022 AND (B)(6) 2022; DUE TO THE PATIENT HAVING RESIDUAL REFRACTION AND POOR UDVA. LENS REMAINS IMPLANTED. Manufacturer Narrative: (B)(4). EXPIRATIO…	Lens Retention + Secondary Operation	Unknown
https://www.accessdata.fda.gov/scripts/cdrh/cfdocs/cfMAUDE/Detail.CFM?MDRFOI__ID=15332387&pc=MTA	2023826-2022-03006	NA	Injury	STAAR SURGICAL COMPANY	2022-08-31 04:00:00	MTA	IMPLANTABLE COLLAMER LENS (ICL)	Misfocusing	Blurred Vision; Appropriate Clinical Signs, Symptoms, Conditions Term / Code Not Available	P030016	NA	1	Event Description: THE REPORTER INDICATED THAT THE SURGEON IMPLANTED A VICM6; -5.00 DIOPTER IMPLANTABLE COLLAMER LENS INTO THE PATIENT'S LEFT EYE (OS) ON (B)(6) 2021. IT WAS INDICATED THAT LASER VISION CORRECTION WAS PERFORMED ON (B)(6) 2022 AND (B)(6) 2022; DUE TO THE PATIENT HAVING RESIDUAL REFRACTION AND POOR UDVA. LENS REMAINS IMPLANTED. Manufacturer Narrative: (B)(4). CLAIM#: (B)(4).	Lens Retention + Secondary Operation	Unknown
https://www.accessdata.fda.gov/scripts/cdrh/cfdocs/cfMAUDE/Detail.CFM?MDRFOI__ID=15442847&pc=MTA	2023826-2022-03082	NA	Injury	STAAR SURGICAL COMPANY	2022-09-16 04:00:00	MTA	IMPLANTABLE COLLAMER LENS (ICL)	Misfocusing	Blurred Vision; Appropriate Clinical Signs, Symptoms, Conditions Term / Code Not Available	P030016	NA	1	Event Description: THE REPORTER INDICATED THAT THE SURGEON IMPLANTED A 12.6MM VICM6_12.6 OF -06.50 DIOPTER IMPLANTABLE COLLAMER LENS INTO THE PATIENT'S RIGHT EYE (OD) ON (B)(6) 2021. IT WAS INDICATED THAT LASER VISION CORRECTION WAS PERFORMED ON (B)(6) 2021 AND A REVISION WAS ALSO PERFORMED ON (B)(6) 2022; DUE TO THE PATIENT HAVING RESIDUAL REFRACTION AND POOR UDVA. LENS REMAINS IMPLANTED. Manufa…	Lens Retention + Secondary Operation	Unknown
https://www.accessdata.fda.gov/scripts/cdrh/cfdocs/cfMAUDE/Detail.CFM?MDRFOI__ID=15442849&pc=MTA	2023826-2022-03081	NA	Injury	STAAR SURGICAL COMPANY	2022-09-16 04:00:00	MTA	IMPLANTABLE COLLAMER LENS (ICL)	Misfocusing	Blurred Vision; Appropriate Clinical Signs, Symptoms, Conditions Term / Code Not Available	P030016	NA	1	Event Description: THE REPORTER INDICATED THAT THE SURGEON IMPLANTED A 12.6MM OR 12.1 MM VICM6 OF -3.0 DIOPTER IMPLANTABLE COLLAMER LENS INTO THE PATIENT'S LEFT EYE (OS) ON (B)(6) 2021. IT WAS INDICATED THAT LASER VISION CORRECTION WAS PERFORMED ON (B)(6) 2022; DUE TO THE PATIENT HAVING RESIDUAL REFRACTION AND POOR UDVA. LENS REMAINS IMPLANTED. Manufacturer Narrative: (B)(4). CLAIM# (B)(4).	Lens Retention + Secondary Operation	Unknown
https://www.accessdata.fda.gov/scripts/cdrh/cfdocs/cfMAUDE/Detail.CFM?MDRFOI__ID=15480051&pc=MTA	2023826-2022-03260	NA	Injury	STAAR SURGICAL COMPANY	2022-09-24 04:00:00	MTA	IMPLANTABLE COLLAMER LENS (ICL)	Misfocusing	Blurred Vision; Appropriate Clinical Signs, Symptoms, Conditions Term / Code Not Available	P030016	NA	1	Event Description: THE REPORTER INDICATED THAT THE SURGEON IMPLANTED A VICM6; -5.50 DIOPTER IMPLANTABLE COLLAMER LENS INTO THE PATIENT'S RIGHT EYE (OD) ON (B)(6) 2021. IT WAS INDICATED THAT LASER VISION CORRECTION WAS PERFORMED ON (B)(6) 2022; DUE TO THE PATIENT HAVING RESIDUAL REFRACTION AND POOR UDVA. LENS REMAINS IMPLANTED. Manufacturer Narrative: (B)(4). CLAIM#: (B)(4).	Lens Retention + Secondary Operation	Unknown
https://www.accessdata.fda.gov/scripts/cdrh/cfdocs/cfMAUDE/Detail.CFM?MDRFOI__ID=15480541&pc=MTA	2023826-2022-03261	NA	Injury	STAAR SURGICAL COMPANY	2022-09-24 04:00:00	MTA	IMPLANTABLE COLLAMER LENS (ICL)	Misfocusing	Blurred Vision; Appropriate Clinical Signs, Symptoms, Conditions Term / Code Not Available	P030016	NA	1	Event Description: THE REPORTER INDICATED THAT THE SURGEON IMPLANTED A VICM6; -5.50 DIOPTER IMPLANTABLE COLLAMER LENS INTO THE PATIENT'S LEFT EYE (OS) ON (B)(6) 2021. IT WAS INDICATED THAT LASER VISION CORRECTION WAS PERFORMED ON (B)(6) 2022; DUE TO THE PATIENT HAVING RESIDUAL REFRACTION AND POOR UDVA. LENS REMAINS IMPLANTED. Manufacturer Narrative: (B)(4).	Lens Retention + Secondary Operation	Unknown
https://www.accessdata.fda.gov/scripts/cdrh/cfdocs/cfMAUDE/Detail.CFM?MDRFOI__ID=12587053&pc=MTA	2023826-2021-03865	2021-09-08	Injury	STAAR SURGICAL COMPANY	2021-10-06	MTA	IMPLANTABLE COLLAMER LENS (ICL)	Misfocusing; Inadequacy of Device Shape and/or Size	Blurred Vision; Appropriate Clinical Signs, Symptoms, Conditions Term / Code Not Available	NA	NA	1	Event Description: THE REPORTER INDICATED THE SURGEON IMPLANTED A 13.7MM VICMO13.7 IMPLANTABLE COLLAMER LENS, -17.50 DIOPTER, IN THE PATIENTS RIGHT EYE (OD) ON (B)(6) 2021. THE LENS WAS REPORTED AS EXCESSIVE VAULTING AND SIGNIFICANT REDUCTION OF IRIDO-CORNEAL ANGLES. THE PATIENT EXPERIENCED A REFRACTIVE SURPRISE AND BLURRED VISION. THE LENS REMAINED IMPLANTED. THE CAUSE OF THE EVENT WAS UNKNOWN. …	Lens Exchange	Resolved
https://www.accessdata.fda.gov/scripts/cdrh/cfdocs/cfMAUDE/Detail.CFM?MDRFOI__ID=16427707&pc=MTA	2023826-2023-00686	2022-11-07	Injury	STAAR SURGICAL COMPANY	2023-02-23	MTA	IMPLANTABLE COLLAMER LENS (ICL)	Misfocusing; Inadequacy of Device Shape and/or Size	Blurred Vision; Appropriate Clinical Signs, Symptoms, Conditions Term / Code Not Available	P030016	NA	1	Event Description: THE REPORTER INDICATED THAT A 13.2MM VICM5_13.2 IMPLANTABLE COLLAMER LENS OF -10.50 DIOPTER WAS IMPLANTED INTO THE PATIENT'S RIGHT EYE (OD) ON (B)(6) 2022. ON (B)(6) 2022 THE LENS WAS EXCHANGED FOR A SHORTER LENGTH LENS DUE TO EXCESSIVE VAULT, SIGNIFICANT REDUCTION OF IRIDOCORNEAL ANGLES AND BLURRED VISION. THE EXCHANGE RESOLVED THE PROBLEM. IN THE REPORTERS OPINION THE DEVICE …	Lens Exchange	Resolved
https://www.accessdata.fda.gov/scripts/cdrh/cfdocs/cfMAUDE/Detail.CFM?MDRFOI__ID=16427709&pc=MTA	2023826-2023-00687	2022-11-07	Injury	STAAR SURGICAL COMPANY	2023-02-23	MTA	IMPLANTABLE COLLAMER LENS (ICL)	Misfocusing; Inadequacy of Device Shape and/or Size	Blurred Vision; Appropriate Clinical Signs, Symptoms, Conditions Term / Code Not Available	P030016	NA	1	Event Description: THE REPORTER INDICATED THAT A 13.2MM VICM5_13.2 IMPLANTABLE COLLAMER LENS OF -13.00 DIOPTER WAS IMPLANTED INTO THE PATIENT'S LEFT EYE (OS) ON (B)(6) 2022. ON (B)(6) 2022 THE LENS WAS EXCHANGED FOR A SHORTER LENGTH LENS DUE TO EXCESSIVE VAULT, SIGNIFICANT REDUCTION OF IRIDOCORNEAL ANGLES AND BLURRED VISION. THE EXCHANGE RESOLVED THE PROBLEM. IN THE REPORTERS OPINION THE DEVICE W…	Lens Exchange	Resolved
https://www.accessdata.fda.gov/scripts/cdrh/cfdocs/cfMAUDE/Detail.CFM?MDRFOI__ID=15396076&pc=MTA	2023826-2022-03059	2022-06-09	Injury	STAAR SURGICAL COMPANY	2022-09-09	MTA	IMPLANTABLE COLLAMER LENS (ICL)	Misfocusing; Off-Label Use; Adverse Event Without Identified Device or Use Problem	Blurred Vision; Appropriate Clinical Signs, Symptoms, Conditions Term / Code Not Available	P030016	NA	1	Event Description: THE REPORTER INDICATED THAT THE SURGEON IMPLANTED A 12.6MM VICMO12.6; -12.5 DIOPTER IMPLANTABLE COLLAMER LENS INTO THE PATIENT'S LEFT EYE (OS) ON (B)(6) 2022. THE PATIENT HAD DIFFICULTY LOOKING CLOSE AND EXPERIENCED BLURRED VISION. THE PATIENT STRONGLY REQUESTED TO REMOVE THE LENS. ON (B)(6) 2022 THE LENS WAS EXPLANTED. THE PROBLEM WAS RESOLVED. Manufacturer Narrative: CORRECTE…	Lens Extraction	Resolved
https://www.accessdata.fda.gov/scripts/cdrh/cfdocs/cfMAUDE/Detail.CFM?MDRFOI__ID=12457491&pc=MTA	2023826-2021-03554	NA	Injury	STAAR SURGICAL COMPANY	2021-09-10	MTA	IMPLANTABLE COLLAMER LENS (ICL)	Misfocusing; Off-Label Use; Inadequacy of Device Shape and/or Size	Blurred Vision; Appropriate Clinical Signs, Symptoms, Conditions Term / Code Not Available	N/A	NA	1	Event Description: THE REPORTER INDICATED THE SURGEON IMPLANTED A 13.2MM VICM5_13.2 IMPLANTABLE COLLAMER LENS, DIOPTER -14.0 INTO THE PATIENT'S LEFT EYE (OS) ON (B)(6) 2021. THE SURGEON REPORTS LOW VAULT, A DECREASE IN BCVA, AND A DECREASE IN THE NUMBER OF INDOTHELIAL CELLS. REPORTEDLY, THE SURGEON DOES NOT PLAN TO SEE THE PATIENT AGAIN FOR ONE YEAR. Manufacturer Narrative: WEIGHT, ETHNICITY, RAC…	Unknown	Unknown
https://www.accessdata.fda.gov/scripts/cdrh/cfdocs/cfMAUDE/Detail.CFM?MDRFOI__ID=17194710&pc=MTA	2023826-2023-02531	NA	Injury	STAAR SURGICAL COMPANY	2023-06-23 04:00:00	MTA	IMPLANTABLE COLLAMER LENS (ICL)	Misfocusing; Off-Label Use; Inadequacy of Device Shape and/or Size; Adverse Event Without Identified Device or Use Problem	Blurred Vision; Appropriate Clinical Signs, Symptoms, Conditions Term / Code Not Available	P030016	NA	1	Event Description: THE REPORTER INDICATED THAT THE SURGEON IMPLANTED A 13.2MM VICM5_13.2; -4.50 DIOPTER IMPLANTABLE COLLAMER LENS INTO THE PATIENT'S RIGHT EYE (OD) ON (B)(6) 2023. THE SURGEON REPORTS THERE IS EXCESSIVE VAULTING AND REFRACTIVE SURPRISE. LENS REMAINS IMPLANTED. PROBLEM IS NOT RESOLVED. Manufacturer Narrative: H6 - MEDICAL DEVICE PROBLEM CODE - 1494: OFF-LABEL USE (ACD < 3.0MM), KER…	Lens Exchange	Resolved
https://www.accessdata.fda.gov/scripts/cdrh/cfdocs/cfMAUDE/Detail.CFM?MDRFOI__ID=12359537&pc=MTA	2023826-2021-03269	2021-01-24	Injury	STAAR SURGICAL COMPANY	2021-08-24	MTA	IMPLANTABLE COLLAMER LENS (ICL)	Misfocusing; Unintended Movement	Blurred Vision; Appropriate Clinical Signs, Symptoms, Conditions Term / Code Not Available	NA	NA	1	Event Description: THE REPORTER INDICATED THE SURGEON IMPLANTED A 13.2MM VICMO13.2 IMPLANTABLE COLLAMER LENS, -08.50 DIOPTER, IN THE PATIENTS RIGHT EYE (OD), ON (B)(6) 2021. THE LENS WAS REPORTED AS BEING IMPLANTED UPSIDE DOWN. THE PATIENT EXPERIENCED A REFRACTIVE SURPRISE AND BLURRED VISION. THERE WAS SIGNIFICANT REDUCTION OF IRIDO-CORNEAL ANGLES. THE SURGEON DECIDED TO ADD NEW PIS DURING ICL IM…	Lens Exchange	Resolved
https://www.accessdata.fda.gov/scripts/cdrh/cfdocs/cfMAUDE/Detail.CFM?MDRFOI__ID=15513701&pc=MTA	2023826-2022-03377	2022-06-09	Injury	STAAR SURGICAL COMPANY	2022-09-30	MTA	IMPLANTABLE COLLAMER LENS (ICL)	Off-Label Use; Adverse Event Without Identified Device or Use Problem	Blurred Vision; Appropriate Clinical Signs, Symptoms, Conditions Term / Code Not Available	P030016	NA	1	Event Description: THE REPORTER INDICATED THAT THE SURGEON IMPLANTED A 12.6MM VICMO12.6; -12.0 DIOPTER IMPLANTABLE COLLAMER LENS INTO THE PATIENT'S RIGHT EYE (OD) ON (B)(6) 2022. THE PATIENT HAD BLURRED VISION AND NEAR VISION WAS DIFFICULT. ON (B)(6) 2022 THE LENS WAS EXPLANTED. THIS RESOLVED THE PROBLEM AND IT WAS NOTED "THE PATIENT HAD DIFFICULTY LOOKING CLOSE AND STRONGLY REQUESTED TO TAKE IT …	Lens Extraction	Resolved
https://www.accessdata.fda.gov/scripts/cdrh/cfdocs/cfMAUDE/Detail.CFM?MDRFOI__ID=11372192&pc=MTA	2023826-2021-00443	2021-02-03	Malfunction	STAAR SURGICAL COMPANY	2021-02-24	MTA	IMPLANTABLE COLLAMER LENS (ICL)	Misfocusing; Inadequacy of Device Shape and/or Size	Blurred Vision; Appropriate Clinical Signs, Symptoms, Conditions Term / Code Not Available; No Clinical Signs, Symptoms or Conditions	N/A	NA	1	Event Description: THE REPORTER INDICATED THAT A 13.2MM, VICM5 13.2, -10.00 DIOPTER, IMPLANTABLE COLLAMER LENS WAS IMPLANTED INTO THE PATIENT'S LEFT EYE (OS) ON (B)(6) 2021. EXCESSIVE VAULT WERE OBSERVED, THE LENS REMAINS IMPLANTED. CAUSE OF THE EVENT IS REPORTED AS UNKNOWN. PER THE REPORTER ON (B)(6) 2021, "LENS EXCHANGE IS PLANNED." Manufacturer Narrative: B5: THE REPORTER INDICATED THAT A 13.2…	Lens Retention	Unknown
https://www.accessdata.fda.gov/scripts/cdrh/cfdocs/cfMAUDE/Detail.CFM?MDRFOI__ID=15055918&pc=MTA	2023826-2022-02273	NA	Injury	STAAR SURGICAL COMPANY	2022-07-19 04:00:00	MTA	IMPLANTABLE COLLAMER LENS (ICL)	Misfocusing; Inadequacy of Device Shape and/or Size	Blurred Vision; Appropriate Clinical Signs, Symptoms, Conditions Term / Code Not Available; No Clinical Signs, Symptoms or Conditions	P030016	NA	1	Event Description: THE REPORTER INDICATED THAT A 13.2MM VICMO 13.2 IMPLANTABLE COLLAMER LENS OF -16.0 DIOPTER WAS IMPLANTED INTO THE PATIENT'S RIGHT EYE (OD). EXCESSIVE VAULT WAS OBSERVED. THE LENS REMAINS IMPLANTED. NO FURTHER INFORMATION HAS BEEN PROVIDED. ATTEMPTS TO OBTAIN ADDITIONAL INFORMATION HAVE NOT BEEN SUCCESSFUL. IF ADDITIONAL INFORMATION IS RECEIVED A SUPPLEMENTAL MEDWATCH REPORT WIL…	Lens Exchange	Resolved
https://www.accessdata.fda.gov/scripts/cdrh/cfdocs/cfMAUDE/Detail.CFM?MDRFOI__ID=15591731&pc=MTA	2023826-2022-03483	NA	Injury	STAAR SURGICAL COMPANY	2022-10-12 04:00:00	MTA	IMPLANTABLE COLLAMER LENS (ICL)	Misfocusing; Off-Label Use; No Apparent Adverse Event	Blurred Vision; Appropriate Clinical Signs, Symptoms, Conditions Term / Code Not Available; No Clinical Signs, Symptoms or Conditions	P030016	NA	1	Event Description: THE REPORTER INDICATED THE SURGEON IMPLANTED A 12.1MM MICL12.1 IMPLANTABLE COLLAMER LENS, -10.00 DIOPTER, IN THE PATIENTS RIGHT EYE (OD) ON (B)(6) 2018. THE LENS WILL BE REMOVED AND EXCHANGED. ADDITIONAL INFORMATION HAS BEEN REQUESTED BUT NONE HAS BEEN FORTHCOMING. Manufacturer Narrative: ADDITIONAL DATA: H6: HEALTH IMPACT- CLINICAL CODE: 4581 - REFRACTIVE CHANGE OVERTIME, KERA…	Lens Exchange	Resolved
https://www.accessdata.fda.gov/scripts/cdrh/cfdocs/cfMAUDE/Detail.CFM?MDRFOI__ID=15591791&pc=MTA	2023826-2022-03484	NA	Injury	STAAR SURGICAL COMPANY	2022-10-12 04:00:00	MTA	IMPLANTABLE COLLAMER LENS (ICL)	Misfocusing; Off-Label Use; No Apparent Adverse Event	Blurred Vision; Appropriate Clinical Signs, Symptoms, Conditions Term / Code Not Available; No Clinical Signs, Symptoms or Conditions	P030016	NA	1	Event Description: THE REPORTER INDICATED THE SURGEON IMPLANTED A 12.1MM MICL12.1 IMPLANTABLE COLLAMER LENS, -10.00 DIOPTER, IN THE PATIENTS LEFT EYE (OS) ON (B)(6) 2018. THE LENS WILL BE REMOVED AND EXCHANGED. ADDITIONAL INFORMATION HAS BEEN REQUESTED BUT NONE HAS BEEN FORTHCOMING. Manufacturer Narrative: H6: HEALTH IMPACT- CLINICAL CODE: 4581 - REFRACTIVE CHANGE OVERTIME, KERATOCONUS. B5: THE R…	Lens Exchange	Resolved
https://www.accessdata.fda.gov/scripts/cdrh/cfdocs/cfMAUDE/Detail.CFM?MDRFOI__ID=8197958&pc=MTA	2023826-2018-01925	2018-09-05	Injury	STAAR SURGICAL COMPANY	2018-12-26	MTA	IMPLANTABLE COLLAMER LENS (ICL)	Misfocusing; Inadequacy of Device Shape and/or Size; Device Dislodged or Dislocated; Adverse Event Without Identified Device or Use Problem	Blurred Vision; Capsular Bag Tear; No Code Available	N/A	NA	1	Event Description: THE REPORTER INDICATED THAT A VICMO13.2, -10.50 DIOPTER, IMPLANTABLE COLLAMER LENS WAS IMPLANTED INTO THE PATIENTS LEFT EYE (OS) ON (B)(6) 2018. A VAULT VALUE OF 0-50 WITH ROTATION AND CAPSULAR TEAR WAS REPORTED. ON (B)(6) 2018 THE LENS WAS EXCHANGED AND THE PROBLEM WAS RESOLVED. IN THE REPORTER OPINION THE CAUSE OF THIS EVENT WAS PATIENT RELATED FACTOR. ADDITIONAL INFORMATION …	Lens Exchange	Resolved
https://www.accessdata.fda.gov/scripts/cdrh/cfdocs/cfMAUDE/Detail.CFM?MDRFOI__ID=14190415&pc=MTA	2023826-2022-01286	2022-03-14	Injury	STAAR SURGICAL COMPANY	2022-04-22	MTA	IMPLANTABLE COLLAMER LENS (ICL)	Misfocusing	Blurred Vision; Discomfort; Appropriate Clinical Signs, Symptoms, Conditions Term / Code Not Available	NA	NA	1	Event Description: THE REPORTER INDICATED THAT A VIVA IMPLANTABLE COLLAMER LENS WAS REMOVED FROM THE PATIENTS LEFT EYE (OS) AND REPLACED WITH AN EVO IMPLANTABLE COLLAMER LENS ON (B)(6) 2022 DUE TO UNCOMFORTABLE VISION "NAUSEA IF PATIENT LOOKS VERY CLOSE (NEAR)." ADDITIONAL INFORMATION HAS BEEN REQUESTED BUT NONE HAS BEEN FORTHCOMING. IF ADDITIONAL INFORMATION IS RECEIVED A SUPPLEMENTAL MEDWATCH R…	Lens Exchange	Resolved
https://www.accessdata.fda.gov/scripts/cdrh/cfdocs/cfMAUDE/Detail.CFM?MDRFOI__ID=9965166&pc=MTA	2023826-2020-00897	2019-04-02	Injury	STAAR SURGICAL COMPANY	2020-04-15	MTA	IMPLANTABLE COLLAMER LENS (ICL)	Adverse Event Without Identified Device or Use Problem	Blurred Vision; Discomfort; No Code Available	NA	NA	1	Event Description: THE REPORTER INDICATED THE SURGEON IMPLANTED A 13.2MM VICM5_13.2 IMPLANTABLE COLLAMER LENS, -09.50 DIOPTER, IN THE PATIENT'S RIGHT EYE (OD), ON (B)(6) 2019. THE LENS WAS EXPLANTED ON (B)(6) 2020 DUE TO PATIENT HAD DISCOMFORT DUE TO ASTIGMATISM AND BLURRED VISION. THE LENS WAS EXCHANGED FOR A DIFFERENT MODEL ICL LENS AND THE PROBLEM WAS RESOLVED. Manufacturer Narrative: ADDITION…	Lens Exchange	Resolved
https://www.accessdata.fda.gov/scripts/cdrh/cfdocs/cfMAUDE/Detail.CFM?MDRFOI__ID=9965173&pc=MTA	2023826-2020-00898	2019-04-02	Injury	STAAR SURGICAL COMPANY	2020-04-15	MTA	IMPLANTABLE COLLAMER LENS (ICL)	Adverse Event Without Identified Device or Use Problem	Blurred Vision; Discomfort; No Code Available	NA	NA	1	Event Description: THE REPORTER INDICATED THE SURGEON IMPLANTED A 13.2MM VICM5_13.2 IMPLANTABLE COLLAMER LENS, -10.50 DIOPTER, IN THE PATIENT'S LEFT EYE (OS), ON (B)(6) 2019. THE LENS WAS EXPLANTED ON (B)(6) 2020 DUE TO PATIENT HAD DISCOMFORT DUE TO ASTIGMATISM AND BLURRED VISION. THE LENS WAS EXCHANGED FOR A DIFFERENT MODEL ICL LENS AND THE PROBLEM WAS RESOLVED. Manufacturer Narrative: ADDITIONA…	Lens Exchange	Resolved
https://www.accessdata.fda.gov/scripts/cdrh/cfdocs/cfMAUDE/Detail.CFM?MDRFOI__ID=7696913&pc=MTA	2023826-2018-01041	2018-05-18	Injury	STAAR SURGICAL COMPANY	2018-07-17	MTA	IMPLANTABLE COLLAMER LENS (ICL)	Misfocusing	Blurred Vision; Discomfort; No Code Available	NA	NA	1	Event Description: THE REPORTER INDICATED THAT THE SURGEON IMPLANTED A 12.6MM VICM5_12.6 IMPLANTABLE COLLAMER LENS, -7.5 DIOPTER, INTO THE PATIENT'S RIGHT EYE (OD) ON (B)(6) 2018. ON (B)(6) 2018 THE LENS WAS EXPLANTED DUE TO DISCOMFORT, AND BLURRED VISION. REPORTEDLY, THE PROBLEM WAS RESOLVED WITH THE EXPLANT. Manufacturer Narrative: THE LENS WAS RETURNED DRY IN A MICRO CENTRIFUGE VIAL. THERE WAS…	Lens Extraction	Resolved
https://www.accessdata.fda.gov/scripts/cdrh/cfdocs/cfMAUDE/Detail.CFM?MDRFOI__ID=7696917&pc=MTA	2023826-2018-01043	2018-05-18	Injury	STAAR SURGICAL COMPANY	2018-07-17	MTA	IMPLANTABLE COLLAMER LENS (ICL)	Misfocusing	Blurred Vision; Discomfort; No Code Available	NA	NA	1	Event Description: THE REPORTER INDICATED THAT THE SURGEON IMPLANTED A 12.6MM VICM5_12.6 IMPLANTABLE COLLAMER LENS, -8.0 DIOPTER, INTO THE PATIENT'S LEFT EYE (OS) ON (B)(6) 2018. ON (B)(6) 2018 THE LENS WAS EXPLANTED DUE TO DISCOMFORT, AND BLURRED VISION. REPORTEDLY, THE PROBLEM WAS RESOLVED WITH THE EXPLANT. Manufacturer Narrative: DEVICE EVALUATION: LENS WAS RETURNED DRY IN A MICRO-CENTRIFUGE V…	Lens Extraction	Resolved
https://www.accessdata.fda.gov/scripts/cdrh/cfdocs/cfMAUDE/Detail.CFM?MDRFOI__ID=12755755&pc=MTA	2023826-2021-04210	2021-07-04	Injury	STAAR SURGICAL COMPANY	2021-11-06	MTA	IMPLANTABLE COLLAMER LENS (ICL)	Misfocusing; Off-Label Use	Blurred Vision; Eye Pain	N/A	NA	1	Event Description: THE REPORTER INDICATED THE SURGEON IMPLANTED A 12.1MM VICMO12.1 IMPLANTABLE COLLAMER LENS, DIOPTER -6.0 INTO THE PATIENT'S LEFT EYE (OS) ON (B)(6) 2021. ON (B)(6) 2021 THE LENS WAS EXPLANTED DUE TO REFRACTIVE SURPRISE AND BLURRED VISION. THE PROBLEM WAS RESOLVED. THE CAUSE OF THE EVENT IS REPORTED AS UNKNOWN. REPORTEDLY, "THE PATIENT HAS A VAGUE OF THE LEFT EYE BRINGING A VERY …	Lens Extraction	Resolved
https://www.accessdata.fda.gov/scripts/cdrh/cfdocs/cfMAUDE/Detail.CFM?MDRFOI__ID=4555190&pc=MTA	2023826-2015-00193	2014-07-21	Injury	STAAR SURGICAL COMPANY	2015-02-27	MTA	ICL (IMPLANTABLE COLLAMER LENS)	Appropriate Term/Code Not Available	Blurred Vision; Halo	P030016	NA	1	Event Description: THE REPORTER INDICATED THE SURGEON IMPLANTED A 12.0MM ICM120V4 IMPLANTABLE COLLAMER LENS IN THE PATIENT'S RIGHT EYE (OD) ON (B)(6) 2013. THE LENS WAS EXPLANTED ON (B)(6) 2014 DUE TO A REFRACTIVE SURPRISE. THE PATIENT EXPERIENCED GLARE/HALOS AND BLURRED VISION. THE LENS WAS EXCHANGED FOR ANOTHER SAME MODEL LENS BUT DIFFERENT DIOPTER POWER (-18.0) AND THE PROBLEM WAS RESOLVED. Ma…	Lens Exchange	Resolved
https://www.accessdata.fda.gov/scripts/cdrh/cfdocs/cfMAUDE/Detail.CFM?MDRFOI__ID=16587339&pc=MTA	2023826-2023-00950	2022-11-24	Injury	STAAR SURGICAL COMPANY	2023-03-21	MTA	IMPLANTABLE COLLAMER LENS (ICL)	Misfocusing; Inadequacy of Device Shape and/or Size; Optical Problem	Blurred Vision; Halo	P030016	NA	1	Event Description: THE REPORTER INDICATED THE SURGEON IMPLANTED A 13.2MM VICM5_13.2 IMPLANTABLE COLLAMER LENS, -07.50 DIOPTER, INTO THE PATIENTS RIGHT EYE (OD) ON (B)(6) 2022. THE LENS WAS REMOVED ON (B)(6) 2023 DUE TO EXCESSIVE VAULTING. THE PATIENT HAD SOME HALOES/BLURRED VISION. THE LENS WAS REPLACED WITH A SHORTER LENS AND THE PROBLEM WAS RESOLVED (HALOES/BLURRED VISION HAD RESOLVED). THE CAU…	Lens Exchange	Resolved
https://www.accessdata.fda.gov/scripts/cdrh/cfdocs/cfMAUDE/Detail.CFM?MDRFOI__ID=15567853&pc=MTA	2023826-2022-03574	NA	Injury	STAAR SURGICAL COMPANY	2022-10-07 04:00:00	MTA	IMPLANTABLE COLLAMER LENS (ICL)	Misfocusing; Optical Problem	Blurred Vision; Halo	P030016	NA	1	Event Description: THE REPORTER INDICATED THAT A 12.6MM MICL12.6 -16.0 DIOPTER IMPLANTABLE COLLAMER LENS WAS IMPLANTED INTO THE PATIENTS LEFT EYE (OS) ON (B)(6) 2019. PATIENT EXPERIENCED HALOS AND BLURRED VISION. ON (B)(6) 2022 THE LENS WAS EXPLANTED. ATTEMPTS TO OBTAIN ADDITIONAL INFORMATION HAVE NOT BEEN SUCCESSFUL. IF ADDITIONAL INFORMATION IS RECEIVED A SUPPLEMENTAL MEDWATCH REPORT WILL BE SU…	Lens Extraction	Unknown
https://www.accessdata.fda.gov/scripts/cdrh/cfdocs/cfMAUDE/Detail.CFM?MDRFOI__ID=16057498&pc=MTA	2023826-2022-04706	2022-08-03	Injury	STAAR SURGICAL COMPANY	2022-12-27	MTA	IMPLANTABLE COLLAMER LENS (ICL)	Optical Problem	Blurred Vision; Halo	P030016	NA	1	Event Description: THE REPORTER INDICATED THAT A 13.2MM VICMO13.2 IMPLANTABLE COLLAMER LENS WITH A DIOPTER OF -12.0 WAS IMPLANTED IN THE PATIENT'S LEFT EYE (OS) ON (B)(6) 2022. ON (B)(6) 2022, THE LENS WAS REMOVED DUE TO GLARE AND HALOS. THE PROBLEM WAS RESOLVED. CAUSE OF THE EVENT IS UNKNOWN. Manufacturer Narrative: WEIGHT, ETHNICITY, RACE: UNK. WORK ORDER SEARCH FOUND NO SIMILAR COMPLAINTS. (B)…	Lens Extraction	Resolved
https://www.accessdata.fda.gov/scripts/cdrh/cfdocs/cfMAUDE/Detail.CFM?MDRFOI__ID=16078375&pc=MTA	2023826-2022-04754	NA	Malfunction	STAAR SURGICAL COMPANY	2022-12-30 05:00:00	MTA	IMPLANTABLE COLLAMER LENS (ICL)	No Apparent Adverse Event	Blurred Vision; Halo; Appropriate Clinical Signs, Symptoms, Conditions Term / Code Not Available	P030016	NA	1	Event Description: THE REPORTER INDICATED THE SURGEON IMPLANTED A 13.7MM VICM5_13.7 IMPLANTABLE COLLAMER LENS, -13.00 DIOPTER, INTO THE PATIENTS LEFT EYE (OS) ON (B)(6) 2022. THE PATIENT REPORTED HAS DEVELOPED POSITIVE DYSPHOTOPSIA AND THE LENS REMAINED IMPLANTED. ADDITIONAL INFORMATION HAS BEEN REQUESTED BUT NONE HAS BEEN FORTHCOMING. Manufacturer Narrative: CORRECTED DATA: B5: THE PATIENT EXPER…	Lens Retention	Unknown
https://www.accessdata.fda.gov/scripts/cdrh/cfdocs/cfMAUDE/Detail.CFM?MDRFOI__ID=16078608&pc=MTA	2023826-2022-04753	NA	Malfunction	STAAR SURGICAL COMPANY	2022-12-30 05:00:00	MTA	IMPLANTABLE COLLAMER LENS (ICL)	No Apparent Adverse Event	Blurred Vision; Halo; Appropriate Clinical Signs, Symptoms, Conditions Term / Code Not Available	P030016	NA	1	Event Description: THE REPORTER INDICATED THE SURGEON IMPLANTED A 13.7MM VICM5_13.7 IMPLANTABLE COLLAMER LENS, -13.00 DIOPTER, INTO THE PATIENTS RIGHT EYE (OD) ON (B)(6) 2022. THE PATIENT REPORTED HAS DEVELOPED POSITIVE DYSPHOTOPSIA AND THE LENS REMAINED IMPLANTED. ADDITIONAL INFORMATION HAS BEEN REQUESTED BUT NONE HAS BEEN FORTHCOMING. Manufacturer Narrative: CORRECTED DATA: B5: THE PATIENT EXPE…	Lens Retention	Unknown
https://www.accessdata.fda.gov/scripts/cdrh/cfdocs/cfMAUDE/Detail.CFM?MDRFOI__ID=16030859&pc=MTA	2023826-2022-04696	2022-07-27	Injury	STAAR SURGICAL COMPANY	2022-12-21	MTA	IMPLANTABLE COLLAMER LENS (ICL)	Inadequacy of Device Shape and/or Size; Patient-Device Incompatibility	Blurred Vision; Halo; Appropriate Clinical Signs, Symptoms, Conditions Term / Code Not Available; No Clinical Signs, Symptoms or Conditions	P030016	NA	1	Event Description: THE REPORTER INDICATED THAT A 13.2MM VICM513.2 IMPLANTABLE COLLAMER LENS OF -1.75 DIOPTER WAS IMPLANTED INTO THE PATIENT'S RIGHT EYE (OD) ON (B)(6) 2021. ON (B)(6) 2022, THE LENS WAS EXCHANGED FOR A SHORTER LENGTH LENS DUE TO EXCESSIVE VAULT, SIGNIFICANT REDUCTION OF IRIDOCORNEAL ANGLES. THE PROBLEM WAS RESOLVED. CAUSE REPORTED AS A PATIENT RELATED FACTOR. STATUS OF THE EYE IS …	Lens Exchange	Resolved
https://www.accessdata.fda.gov/scripts/cdrh/cfdocs/cfMAUDE/Detail.CFM?MDRFOI__ID=16030862&pc=MTA	2023826-2022-04697	2022-07-27	Injury	STAAR SURGICAL COMPANY	2022-12-21	MTA	IMPLANTABLE COLLAMER LENS (ICL)	Inadequacy of Device Shape and/or Size; Patient-Device Incompatibility	Blurred Vision; Halo; Appropriate Clinical Signs, Symptoms, Conditions Term / Code Not Available; No Clinical Signs, Symptoms or Conditions	P030016	NA	1	Event Description: THE REPORTER INDICATED THAT A 13.2MM VICM513.2 IMPLANTABLE COLLAMER LENS OF -2.50 DIOPTER WAS IMPLANTED INTO THE PATIENT'S LEFT EYE (OS) ON (B)(6) 2021. ON (B)(6) 2022, THE LENS WAS EXCHANGED FOR A SHORTER LENGTH LENS DUE TO EXCESSIVE VAULT, SIGNIFICANT REDUCTION OF IRIDOCORNEAL ANGLES. THE PROBLEM WAS RESOLVED. CAUSE REPORTED AS A PATIENT RELATED FACTOR. STATUS OF THE EYE IS "…	Lens Exchange	Resolved
https://www.accessdata.fda.gov/scripts/cdrh/cfdocs/cfMAUDE/Detail.CFM?MDRFOI__ID=5012303&pc=MTA	2023826-2015-01021	2015-02-21	Injury	STAAR SURGICAL COMPANY	2015-08-18	MTA	ICL (IMPLANTABLE COLLAMER LENS)	Appropriate Term/Code Not Available	Blurred Vision; Halo; No Code Available	NA	NA	1	Event Description: THE REPORTER INDICATED THE SURGEON IMPLANTED A 12.6MM VICMO12.6 IMPLANTABLE COLLAMER LENS, -15.00 DIOPTER, IN THE PATIENT'S RIGHT EYE (OD) ON (B)(6) 2015. THE LENS WAS EXPLANTED ON (B)(6) 2015 DUE TO PATIENT EXPERIENCED GLARE/HALOS AND BLURRED VISION. THE LENS WAS NOT EXCHANGED FOR ANOTHER LENS. THE PATIENT'S POST-OP BEST-CORRECTED VISUAL ACUITY WAS 20/25._x000D_ Manufacturer N…	Lens Extraction	Unknown
https://www.accessdata.fda.gov/scripts/cdrh/cfdocs/cfMAUDE/Detail.CFM?MDRFOI__ID=5012304&pc=MTA	2023826-2015-01022	2015-02-21	Injury	STAAR SURGICAL COMPANY	2015-08-18	MTA	ICL (IMPLANTABLE COLLAMER LENS)	Appropriate Term/Code Not Available	Blurred Vision; Halo; No Code Available	NA	NA	1	Event Description: THE REPORTER INDICATED THE SURGEON IMPLANTED A 12.6MM VICMO12.6 IMPLANTABLE COLLAMER LENS, -15.50 DIOPTER, IN THE PATIENT'S LEFT EYE (OS) ON (B)(6) 2015. THE LENS WAS EXPLANTED ON (B)(6) 2015 DUE TO PATIENT EXPERIENCED GLARE/HALOS AND BLURRED VISION. THE LENS WAS NOT EXCHANGED FOR ANOTHER LENS. THE PATIENT'S POST-OP BEST-CORRECTED VISUAL ACUITY WAS 20/20. Manufacturer Narrative…	Lens Extraction	Unknown
https://www.accessdata.fda.gov/scripts/cdrh/cfdocs/cfMAUDE/Detail.CFM?MDRFOI__ID=5154940&pc=MTA	2023826-2015-01345	2015-03-13	Injury	STAAR SURGICAL COMPANY	2015-10-15	MTA	ICL (IMPLANTABLE COLLAMER LENS)	Appropriate Term/Code Not Available	Blurred Vision; Halo; No Code Available	NA	NA	1	Event Description: THE REPORTER INDICATED THE SURGEON IMPLANTED A 13.2MM VICMO13.2 IMPLANTABLE COLLAMER LENS, -11.50 DIOPTER, IN THE PATIENT'S RIGHT EYE (OD) ON (B)(6) 2015. THE LENS WAS EXPLANTED ON (B)(6) 2015 DUE TO GLARE/HALOS AND BLURRED VISION. THE LENS WAS NOT EXCHANGED FOR ANOTHER LENS._x000D_ Manufacturer Narrative: THIS PRODUCT IS MANUFACTURED IN THE U.S. BUT NOT MARKETED IN THE U.S. (B…	Lens Extraction	Unknown
https://www.accessdata.fda.gov/scripts/cdrh/cfdocs/cfMAUDE/Detail.CFM?MDRFOI__ID=5154947&pc=MTA	2023826-2015-01346	2015-03-13	Injury	STAAR SURGICAL COMPANY	2015-10-15	MTA	ICL (IMPLANTABLE COLLAMER LENS)	Appropriate Term/Code Not Available	Blurred Vision; Halo; No Code Available	NA	NA	1	Event Description: THE REPORTER INDICATED THE SURGEON IMPLANTED A 13.2MM VICMO13.2 IMPLANTABLE COLLAMER LENS, -11.00 DIOPTER, IN THE PATIENT'S LEFT EYE (OS) ON (B)(6) 2015. THE LENS WAS EXPLANTED ON (B)(6) 2015 DUE TO GLARE/HALOS AND BLURRED VISION. THE LENS WAS NOT EXCHANGED FOR ANOTHER LENS. Manufacturer Narrative: THIS PRODUCT IS MANUFACTURED IN THE U.S. BUT NOT MARKETED IN THE U.S. (B)(4). ME…	Lens Extraction	Unknown
https://www.accessdata.fda.gov/scripts/cdrh/cfdocs/cfMAUDE/Detail.CFM?MDRFOI__ID=6589778&pc=MTA	2023826-2017-00880	2017-02-20	Injury	STAAR SURGICAL COMPANY	2017-05-24	MTA	IMPLANTABLE COLLAMER LENS (ICL)	Device Operates Differently Than Expected; Adverse Event Without Identified Device or Use Problem	Blurred Vision; Halo; No Code Available	NA	NA	1	Event Description: THE REPORTER INDICATED THE SURGEON IMPLANTED A 12.1MM VICMO12.1 IMPLANTABLE COLLAMER LENS, -08.50 DIOPTER, IN THE PATIENT'S LEFT EYE (OS) ON (B)(6) 2017. THE LENS WAS EXPLANTED ON (B)(6) 2017 DUE TO GLARE/HALOS AND BLURRED VISION. THE LENS EXPLANT RESOLVED THE PROBLEM. ANOTHER LENS WAS NOT IMPLANTED. Manufacturer Narrative: ADDITIONAL DATA: DEVICE EVALUATION: THE LENS WAS RETUR…	Lens Extraction	Resolved
https://www.accessdata.fda.gov/scripts/cdrh/cfdocs/cfMAUDE/Detail.CFM?MDRFOI__ID=6589780&pc=MTA	2023826-2017-00879	2017-02-20	Injury	STAAR SURGICAL COMPANY	2017-05-24	MTA	IMPLANTABLE COLLAMER LENS (ICL)	Device Operates Differently Than Expected; Adverse Event Without Identified Device or Use Problem	Blurred Vision; Halo; No Code Available	NA	NA	1	Event Description: THE REPORTER INDICATED THE SURGEON IMPLANTED A 12.1MM VICMO12.1 IMPLANTABLE COLLAMER LENS, -08.50 DIOPTER, IN THE PATIENT'S RIGHT EYE (OD) ON (B)(6) 2017. THE LENS WAS EXPLANTED ON (B)(6) 2017 DUE TO GLARE/HALOS AND BLURRED VISION. THE LENS EXPLANT RESOLVED THE PROBLEM. ANOTHER LENS WAS NOT IMPLANTED. Manufacturer Narrative: ADDITIONAL DATA: DEVICE EVALUATION: THE LENS WAS RETU…	Lens Extraction	Resolved
https://www.accessdata.fda.gov/scripts/cdrh/cfdocs/cfMAUDE/Detail.CFM?MDRFOI__ID=6041103&pc=MTA	2023826-2016-01094	2016-01-23	Injury	STAAR SURGICAL COMPANY	2016-10-19	MTA	ICL (IMPLANTABLE COLLAMER LENS)	Device Operates Differently Than Expected; Appropriate Term/Code Not Available	Blurred Vision; Halo; No Code Available	NA	NA	1	Event Description: THE REPORTER INDICATED THAT THE SURGEON INSERTED A 12.6MM VICMO12.6 IMPLANTABLE COLLAMER LENS, -06.50 DIOPTER, IN THE PATIENT'S LEFT EYE ON (B)(6) 2014. THE LENS WAS EXPLANTED ON (B)(6) 2016 DUE TO GLARES/HALOES AND BLURRED VISION. THE LENS WAS EXCHANGED FOR A TORIC LENS OF THE SAME LENGTH AND THE PROBLEM WAS RESOLVED. Manufacturer Narrative: PATIENT'S LAST VISIT WAS ON (B)(6) …	Lens Exchange	Resolved
https://www.accessdata.fda.gov/scripts/cdrh/cfdocs/cfMAUDE/Detail.CFM?MDRFOI__ID=6041106&pc=MTA	2023826-2016-01093	2016-01-23	Injury	STAAR SURGICAL COMPANY	2016-10-19	MTA	ICL (IMPLANTABLE COLLAMER LENS)	Device Operates Differently Than Expected; Appropriate Term/Code Not Available	Blurred Vision; Halo; No Code Available	NA	NA	1	Event Description: THE REPORTER INDICATED THAT THE SURGEON INSERTED A 12.6MM VICMO 12.6 IMPLANTABLE COLLAMER LENS, -06.50 DIOPTER, IN THE PATIENT'S RIGHT EYE ON (B)(6) 2014. THE LENS WAS EXPLANTED ON (B)(6) 2016 DUE TO GLARES/HALOES AND BLURRED VISION. THE LENS WAS EXCHANGED FOR A TORIC LENS OF THE SAME LENGTH AND THE PROBLEM WAS RESOLVED. Manufacturer Narrative: PATIENT'S POST-OP UNCORRECTED VIS…	Lens Exchange	Resolved
https://www.accessdata.fda.gov/scripts/cdrh/cfdocs/cfMAUDE/Detail.CFM?MDRFOI__ID=5797034&pc=MTA	2023826-2016-00924	2016-03-02	Injury	STAAR SURGICAL COMPANY	2016-07-14	MTA	ICL (IMPLANTABLE COLLAMER LENS)	Device Operates Differently Than Expected; Appropriate Term/Code Not Available	Blurred Vision; Halo; No Code Available	NA	NA	1	Event Description: THE REPORTER INDICATED THE SURGEON IMPLANTED A 13.2MM VICMO13.2 IMPLANTABLE COLLAMER LENS, -09.00 DIOPTER, IN THE PATIENT'S RIGHT EYE (OD) ON (B)(6) 2016. THE LENS WAS EXPLANTED ON (B)(6) 2016 DUE TO GLARES/HALOS AND BLURRED VISION. THE LENS WAS EXCHANGED FOR A TORIC ICL AND THE PROBLEM WAS RESOLVED. THE PATIENT'S POST-OP BEST-CORRECTED VISUAL ACUITY WAS 20/20. Manufacturer Nar…	Lens Exchange	Resolved
https://www.accessdata.fda.gov/scripts/cdrh/cfdocs/cfMAUDE/Detail.CFM?MDRFOI__ID=4614664&pc=MTA	2023826-2015-00346	2014-10-04	Injury	STAAR SURGICAL COMPANY	2015-03-18	MTA	ICL (IMPLANTABLE COLLAMER LENS)	Inadequacy of Device Shape and/or Size; Appropriate Term/Code Not Available	Blurred Vision; Halo; No Code Available	NA	NA	1	Event Description: THE REPORTER INDICATED THE SURGEON IMPLANTED A 12.6MM VICMO12.6 IMPLANTABLE COLLAMER LENS IN THE PATIENT'S RIGHT EYE (OD) ON (B)(6) 2014. THE LENS WAS EXPLANTED ON (B)(6) 2014 DUE TO EXCESSIVE VAULTING. THE PATIENT EXPERIENCED GLARE/HALOS AND BLURRED VISION. THE LENS WAS EXCHANGED FOR A SHORTER LENS AND THE PROBLEM WAS RESOLVED. Manufacturer Narrative: THIS PRODUCT IS MANUFACTU…	Lens Exchange	Resolved
https://www.accessdata.fda.gov/scripts/cdrh/cfdocs/cfMAUDE/Detail.CFM?MDRFOI__ID=4614665&pc=MTA	2023826-2015-00347	2014-10-04	Injury	STAAR SURGICAL COMPANY	2015-03-18	MTA	ICL (IMPLANTABLE COLLAMER LENS)	Inadequacy of Device Shape and/or Size; Appropriate Term/Code Not Available	Blurred Vision; Halo; No Code Available	NA	NA	1	Event Description: THE REPORTER INDICATED THE SURGEON IMPLANTED A 12.6MM VICMO12.6 IMPLANTABLE COLLAMER LENS IN THE PATIENT'S LEFT EYE (OS) ON (B)(6) 2014. THE LENS WAS EXPLANTED ON (B)(6) 2014 DUE TO EXCESSIVE VAULTING. THE PATIENT EXPERIENCED GLARE/HALOS AND BLURRED VISION. THE LENS WAS EXCHANGED FOR A SHORTER LENS AND THE PROBLEM WAS RESOLVED._x000D_ Manufacturer Narrative: (B)(4): EVALUATION:…	Lens Exchange	Resolved
https://www.accessdata.fda.gov/scripts/cdrh/cfdocs/cfMAUDE/Detail.CFM?MDRFOI__ID=5664100&pc=MTA	2023826-2016-00661	2016-04-07	Injury	STAAR SURGICAL COMPANY	2016-05-18	MTA	ICL (IMPLANTABLE COLLAMER LENS)	Inadequacy of Device Shape and/or Size; Appropriate Term/Code Not Available	Blurred Vision; Loss of Vision; No Code Available	N/A	NA	1	Event Description: THE REPORTER INDICATED THAT THE SURGEON IMPLANTED A 13.2MM VICMO13.2 IMPLANTABLE COLLAMER LENS, -9.50 DIOPTER, IN THE PATIENT'S LEFT EYE (OS) ON (B)(6) 2016. THE LENS WAS REPORTED AS HAVING AN EXCESSIVE VAULT. THE PATIENT EXPERIENCED A REFRACTIVE SURPRISE AND LOSS OF BEST-CORRECTED VISUAL ACUITY (BCVA). THE LENS REMAINS IMPLANTED AND IT IS PLANNED TO EXCHANGE THE LENS._x000D_ M…	Lens Exchange	Resolved
https://www.accessdata.fda.gov/scripts/cdrh/cfdocs/cfMAUDE/Detail.CFM?MDRFOI__ID=17216360&pc=MTA	2023826-2023-02162	NA	Injury	STAAR SURGICAL COMPANY	2023-06-28 04:00:00	MTA	IMPLANTABLE COLLAMER LENS (ICL)	Adverse Event Without Identified Device or Use Problem	Blurred Vision; No Clinical Signs, Symptoms or Conditions	P030016	NA	1	Event Description: THE REPORTER INDICATED THAT A 12.6MM, VICM5_12.6, -6.0 DIOPTER, IMPLANTABLE COLLAMER LENS WAS EXCHANGED. ADDITIONAL INFORMATION HAS BEEN REQUESTED BUT NONE HAS BEEN FORTHCOMING. Manufacturer Narrative: A1 - A6 - UNK. B3 - UNK. D6A - UNK. D6B - UNK. CLAIM# (B)(4). Manufacturer Narrative: CORRECTED DATA: B5 - THE PATIENT HAD BLURRY VISION AS A RESULT OF THE WRONG IMPLANTED LENS -…	Lens Exchange	Unknown
https://www.accessdata.fda.gov/scripts/cdrh/cfdocs/cfMAUDE/Detail.CFM?MDRFOI__ID=14627897&pc=MTA	2023826-2022-01722	2022-02-15	Injury	STAAR SURGICAL COMPANY	2022-06-07	MTA	IMPLANTABLE COLLAMER LENS (ICL)	Inadequacy of Device Shape and/or Size; No Apparent Adverse Event	Blurred Vision; No Clinical Signs, Symptoms or Conditions	P030016	NA	1	Event Description: THE REPORTER INDICATED THAT A 12.6MM VICMO12.6 IMPLANTABLE COLLAMER LENS OF -6.5 DIOPTER WAS IMPLANTED INTO THE PATIENT'S LEFT EYE (OS) ON (B)(6) 2022. ON (B)(6) 2022, THE LENS WAS EXCHANGED FOR A SHORTER LENGTH LENS DUE TO EXCESSIVE VAULT. THE PROBLEM WAS RESOLVED. CAUSE REPORTED AS UNKNOWN. Manufacturer Narrative: CLAIM#: (B)(4). Manufacturer Narrative: ADDITIONAL/ CORRECTED …	Lens Exchange	Resolved
https://www.accessdata.fda.gov/scripts/cdrh/cfdocs/cfMAUDE/Detail.CFM?MDRFOI__ID=11778983&pc=MTA	2023826-2021-01321	2021-02-26	Malfunction	STAAR SURGICAL COMPANY	2021-05-05	MTA	IMPLANTABLE COLLAMER LENS (ICL)	Misfocusing	Blurred Vision; No Clinical Signs, Symptoms or Conditions	N/A	NA	1	Event Description: THE REPORTER INDICATED THAT A 13.2MM, VICM6 13.2, -1.50 DIOPTER, IMPLANTABLE COLLAMER LENS WAS IMPLANTED INTO THE PATIENT'S LEFT EYE (OS) ON (B)(6) 2021. REFRACTIVE SURPRISE AND PERMANENT LOSS OF BCVA WAS OBSERVED. PRESCRIBED DISTANCE GLASSES. LENS REMAINS IMPLANTED. ADDITIONAL INFORMATION HAS BEEN REQUESTED BUT NONE HAS BEEN FORTHCOMING. IF ADDITIONAL INFORMATION IS RECEIVED A…	Lens Retention	Unknown
https://www.accessdata.fda.gov/scripts/cdrh/cfdocs/cfMAUDE/Detail.CFM?MDRFOI__ID=11778984&pc=MTA	2023826-2021-01320	2021-02-26	Malfunction	STAAR SURGICAL COMPANY	2021-05-05	MTA	IMPLANTABLE COLLAMER LENS (ICL)	Misfocusing	Blurred Vision; No Clinical Signs, Symptoms or Conditions	N/A	NA	1	Event Description: THE REPORTER INDICATED THAT A 13.2MM, VICM6 13.2, -1.50 DIOPTER, IMPLANTABLE COLLAMER LENS WAS IMPLANTED INTO THE PATIENT'S RIGHT EYE (OD) ON (B)(6) 2021. REFRACTIVE SURPRISE AND PERMANENT LOSS OF BCVA WAS OBSERVED. PRESCRIBED DISTANCE GLASSES. LENS REMAINS IMPLANTED. ADDITIONAL INFORMATION HAS BEEN REQUESTED BUT NONE HAS BEEN FORTHCOMING. IF ADDITIONAL INFORMATION IS RECEIVED …	Lens Retention	Unknown
https://www.accessdata.fda.gov/scripts/cdrh/cfdocs/cfMAUDE/Detail.CFM?MDRFOI__ID=15230266&pc=MTA	2023826-2022-02685	2021-10-14	Injury	STAAR SURGICAL COMPANY	2022-08-15	MTA	IMPLANTABLE COLLAMER LENS (ICL)	Misfocusing	Blurred Vision; No Clinical Signs, Symptoms or Conditions	P030016	NA	1	Event Description: THE REPORTER INDICATED THAT THE SURGEON IMPLANTED A 12.1MM VICM5 12.1 IMPLANTABLE COLLAMER LENS OF -3.00 DIOPTER INTO THE PATIENTS RIGHT EYE (OD) ON (B)(6) 2021. ON (B)(6) 2022 THE LENS WAS EXCHANGED FOR A SAME MODE SIZE LENS BUT DIFFERENT DIOPTER DUE TO REFRACTIVE SURPRISE. THE EXCHANGE LENS RESOLVED THE PROBLEM. CAUSE REPORTED AS USER ERROR AND THE DEVICE DID NOT FAIL TO PERF…	Lens Exchange	Resolved
https://www.accessdata.fda.gov/scripts/cdrh/cfdocs/cfMAUDE/Detail.CFM?MDRFOI__ID=15554010&pc=MTA	2023826-2022-03517	2021-10-25	Injury	STAAR SURGICAL COMPANY	2022-10-06	MTA	IMPLANTABLE COLLAMER LENS (ICL)	Misfocusing	Blurred Vision; No Clinical Signs, Symptoms or Conditions	P030016	NA	1	Event Description: THE REPORTER INDICATED THAT A 12.6MM VICMO 12.6 IMPLANTABLE COLLAMER LENS OF -11.0 DIOPTER WAS IMPLANTED INTO THE PATIENT'S LEFT EYE (OS) ON (B)(6) 2021. ON (B)(6) 2021 THE LENS WAS EXCHANGED FOR A SAME MODEL; SIZE LENS BUT DIFFERENT DIOPTER DUE TO REFRACTIVE SURPRISE. THE REPLACEMENT LENS RESOLVED THE PROBLEM. CAUSE REPORTED AS UNKNOWN. "THE PATIENT IS (B)(6), PRESBYOPIA -1.50…	Lens Exchange	Resolved
https://www.accessdata.fda.gov/scripts/cdrh/cfdocs/cfMAUDE/Detail.CFM?MDRFOI__ID=15136767&pc=MTA	2023826-2022-02525	2022-03-01	Injury	STAAR SURGICAL COMPANY	2022-07-30	MTA	IMPLANTABLE COLLAMER LENS (ICL)	Misfocusing	Blurred Vision; No Clinical Signs, Symptoms or Conditions	P030016	NA	1	Event Description: THE REPORTER INDICATED THAT THE SURGEON IMPLANTED A 12.1MM VICMO 12.1 IMPLANTABLE COLLAMER LENS OF -6.5 DIOPTER INTO THE PATIENTS RIGHT EYE (OD) ON (B)(6) 2022. ON (B)(6) 2022 THE LENS WAS EXCHANGED FOR A SAME/ MODEL AND SIZE LENS BUT DIFFERENT DIOPTER DUE TO REFRACTIVE SURPRISE. THE REPLACEMENT LENS RESOLVED THE PROBLEM. CAUSE REPORTED AS UNKNOWN. Manufacturer Narrative: H3 DE…	Lens Exchange	Resolved
https://www.accessdata.fda.gov/scripts/cdrh/cfdocs/cfMAUDE/Detail.CFM?MDRFOI__ID=15136769&pc=MTA	2023826-2022-02526	2022-05-30	Injury	STAAR SURGICAL COMPANY	2022-07-30	MTA	IMPLANTABLE COLLAMER LENS (ICL)	Misfocusing	Blurred Vision; No Clinical Signs, Symptoms or Conditions	P030016	NA	1	Event Description: THE REPORTER INDICATED THAT THE SURGEON IMPLANTED A 12.6MM VICMO 12.6 IMPLANTABLE COLLAMER LENS OF -11.0 DIOPTER INTO THE PATIENTS RIGHT EYE (OD) ON (B)(6) 2021. ON (B)(6) 2022 THE LENS WAS EXCHANGED FOR A TORIC MODEL LENS OF THE SAME SIZE DUE TO REFRACTIVE SURPRISE. THE REPLACEMENT LENS RESOLVED THE PROBLEM. CAUSE REPORTED AS UNKNOWN. Manufacturer Narrative: H3 - DEVICE EVALUA…	Lens Exchange	Resolved
https://www.accessdata.fda.gov/scripts/cdrh/cfdocs/cfMAUDE/Detail.CFM?MDRFOI__ID=15352414&pc=MTA	2023826-2022-03015	2022-06-17	Injury	STAAR SURGICAL COMPANY	2022-09-02	MTA	IMPLANTABLE COLLAMER LENS (ICL)	Misfocusing	Blurred Vision; No Clinical Signs, Symptoms or Conditions	P030016	NA	1	Event Description: THE REPORTER INDICATED THAT A 12.6MM VICM5 12.6 IMPLANTABLE COLLAMER LENS OF -8.00 DIOPTER WAS IMPLANTED INTO THE PATIENT'S RIGHT EYE (OD) ON (B)(6) 2022. REFRACTIVE SURPRISE WAS OBSERVED. ON (B)(6) 2022 THE LENS WAS EXCHANGED FOR A SAME MODEL AND SIZE LENS WITH A DIFFERENT DIOPTER. THE EXCHANGE RESOLVED THE PROBLEM. Manufacturer Narrative: CORRECTED DATA: B4: DATE OF THIS REPO…	Lens Exchange	Resolved
https://www.accessdata.fda.gov/scripts/cdrh/cfdocs/cfMAUDE/Detail.CFM?MDRFOI__ID=15674658&pc=MTA	2023826-2022-03576	2022-09-05	Injury	STAAR SURGICAL COMPANY	2022-10-26	MTA	IMPLANTABLE COLLAMER LENS (ICL)	Misfocusing	Blurred Vision; No Clinical Signs, Symptoms or Conditions	P030016	NA	1	Event Description: THE REPORTER INDICATED THAT A 13.2MM VICM5 13.2 IMPLANTABLE COLLAMER LENS OF -17.00 DIOPTER WAS IMPLANTED INTO THE PATIENT'S LEFT EYE (OS) ON (B)(6) 2022. REFRACTIVE SURPRISE WAS OBSERVED. THE LENS WAS REMOVED ON (B)(6) 2022 AND ON THE SAME DAY DIFFERENT SURGERY A REPLACEMENT LENS OF THE SAME MODEL; SIZE AND DIFFERENT DIOPTER WAS IMPLANTED. THE PROBLEM WAS RESOLVED. CAUSE REPOR…	Lens Exchange	Resolved
https://www.accessdata.fda.gov/scripts/cdrh/cfdocs/cfMAUDE/Detail.CFM?MDRFOI__ID=16603910&pc=MTA	2023826-2023-00955	NA	Injury	STAAR SURGICAL COMPANY	2023-03-23 04:00:00	MTA	IMPLANTABLE COLLAMER LENS (ICL)	Misfocusing	Blurred Vision; No Clinical Signs, Symptoms or Conditions	UNK	NA	1	Event Description: THE REPORTER INDICATED THE SURGEON IMPLANTED A 12.6MM VICM6_12.6 IMPLANTABLE COLLAMER LENS, -07.00 DIOPTER, IN THE PATIENTS LEFT EYE (OS) ON (B)(6) 2022. THE LENS WAS REMOVED ON(B)(6) 2023 DUE TO THE PATIENT EXPERIENCED A REFRACTIVE SURPRISE. THE LENS WAS REPLACED WITH A DIFFERENT MODEL BUT SAME LENGTH LENS AND THE PROBLEM WAS RESOLVED. THE CAUSE OF THE EVENT WAS UNKNOWN. Manuf…	Lens Exchange	Resolved
https://www.accessdata.fda.gov/scripts/cdrh/cfdocs/cfMAUDE/Detail.CFM?MDRFOI__ID=10669961&pc=MTA	2023826-2020-02332	2020-09-03	Injury	STAAR SURGICAL COMPANY	2020-10-13	MTA	IMPLANTABLE COLLAMER LENS (ICL)	Misfocusing; Adverse Event Without Identified Device or Use Problem	Blurred Vision; No Clinical Signs, Symptoms or Conditions	NA#S-P#NA	NA	1	Event Description: THE REPORTER INDICATED THE SURGEON IMPLANTED A 12.6MM VICM5_12.6 IMPLANTABLE COLLAMER LENS, -06.00 DIOPTER, INTO THE PATIENTS LEFT EYE (OS), ON (B)(6) 2020. THE LENS WAS EXPLANTED ON (B)(6) 2020 DUE TO PATIENT EXPERIENCED A REFRACTIVE SURPRISE. THE LENS WAS EXCHANGED FOR A SAME MODEL/LENGTH BUT DIFFERENT DIOPTER LENS AND THE PROBLEM WAS RESOLVED. THE CAUSE OF THE EVENT WAS UNKN…	Lens Exchange	Resolved
https://www.accessdata.fda.gov/scripts/cdrh/cfdocs/cfMAUDE/Detail.CFM?MDRFOI__ID=18048073&pc=MTA	2023826-2023-04718	2023-10-11	Injury	STAAR SURGICAL COMPANY	2023-11-01	MTA	IMPLANTABLE COLLAMER LENS (ICL)	Misfocusing; Improper or Incorrect Procedure or Method; Adverse Event Without Identified Device or Use Problem	Blurred Vision; No Clinical Signs, Symptoms or Conditions	P030016	NA	1	Event Description: THE REPORTER INDICATED THAT THE SURGEON IMPLANTED A 12.6MM VICM5 12.6, -5.5 DIOPTER, IMPLANTABLE COLLAMER LENS INTO THE PATIENT'S LEFT EYE (OS) ON (B)(6) 2023. THE WRONG POST-OPERATIVE CORRECTION FOR CALCUATION WAS USE BY SURGEON BY ERROR. LENS REMAINS IMPLANTED. CAUSE OF THE EVENT IS REPORTED AS USER ERROR. Manufacturer Narrative: CORRECTED DATA: H6-HEALTH EFFECT- CLINICAL COD…	Lens Exchange	Resolved
https://www.accessdata.fda.gov/scripts/cdrh/cfdocs/cfMAUDE/Detail.CFM?MDRFOI__ID=9983359&pc=MTA	2023826-2020-00933	2014-11-05	Injury	STAAR SURGICAL COMPANY	2020-04-21	MTA	IMPLANTABLE COLLAMER LENS (ICL)	Misfocusing; Inadequacy of Device Shape and/or Size	Blurred Vision; No Clinical Signs, Symptoms or Conditions	N/A	NA	1	Event Description: THE REPORTER INDICATED THAT THE SURGEON IMPLANTED A 12.6MM VICMO12.6 IMPLANTABLE COLLAMER LENS, DIOPTER -5.5 INTO THE PATIENT'S LEFT EYE (OS) ON (B)(6) 2014. THE SURGEON NOTES REFRACTIVE CHANGE OVER TIME AND LOW VAULT. REPORTEDLY THE LENS REMAINS IMPLANTED. THE CAUSE OF THE EVENT IS REPORTED AS UNKNOWN. Manufacturer Narrative: ADDITIONAL INFORMATION: B5- ON (B)(6) 2020 THE LENS…	Lens Exchange	Resolved
https://www.accessdata.fda.gov/scripts/cdrh/cfdocs/cfMAUDE/Detail.CFM?MDRFOI__ID=9983362&pc=MTA	2023826-2020-00932	2014-11-05	Injury	STAAR SURGICAL COMPANY	2020-04-21	MTA	IMPLANTABLE COLLAMER LENS (ICL)	Misfocusing; Inadequacy of Device Shape and/or Size	Blurred Vision; No Clinical Signs, Symptoms or Conditions	N/A#S-P#N/A	NA	1	Event Description: THE REPORTER INDICATED THAT THE SURGEON IMPLANTED A 12.6MM VICMO12.6 IMPLANTABLE COLLAMER LENS, DIOPTER -5.0 INTO THE PATIENT'S RIGHT EYE (OD) ON (B)(6) 2014. THE SURGEON NOTES REFRACTIVE CHANGE OVER TIME AND LOW VAULT. REPORTEDLY THE LENS REMAINS IMPLANTED. THE CAUSE OF THE EVENT IS REPORTED AS UNKNOWN. Manufacturer Narrative: ADDITIONAL INFORMATION: H3: DEVICE EVALUATION: LEN…	Lens Exchange	Resolved
https://www.accessdata.fda.gov/scripts/cdrh/cfdocs/cfMAUDE/Detail.CFM?MDRFOI__ID=15686315&pc=MTA	2023826-2022-03836	2022-09-23	Injury	STAAR SURGICAL COMPANY	2022-10-27	MTA	IMPLANTABLE COLLAMER LENS (ICL)	Misfocusing; Inadequacy of Device Shape and/or Size	Blurred Vision; No Clinical Signs, Symptoms or Conditions	NA	NA	1	Event Description: THE REPORTER INDICATED THAT A ICM120V4 IMPLANTABLE COLLAMER LENS OF A -10.00 DIOPTER WAS IMPLANTED INTO THE PATIENT'S RIGHT EYE (OD) ON (B)(6) 2013. ON (B)(6) 2022, LOW VAULT AND REFRACTIVE CHANGE OVERTIME WAS OBSERVED. LENS REMAINS IMPLANTED. Manufacturer Narrative: PATIENT WEIGHT, ETHNICITY, RACE: UNKNOWN. THIS PRODUCT IS NOT MARKETED IN THE US. CLAIM# (B)(4). Manufacturer Na…	Lens Exchange	Unknown
https://www.accessdata.fda.gov/scripts/cdrh/cfdocs/cfMAUDE/Detail.CFM?MDRFOI__ID=15686372&pc=MTA	2023826-2022-03837	2022-09-23	Injury	STAAR SURGICAL COMPANY	2022-10-27	MTA	IMPLANTABLE COLLAMER LENS (ICL)	Misfocusing; Inadequacy of Device Shape and/or Size	Blurred Vision; No Clinical Signs, Symptoms or Conditions	NA	NA	1	Event Description: THE REPORTER INDICATED THAT A ICM120V4 IMPLANTABLE COLLAMER LENS OF A -13.00 DIOPTER WAS IMPLANTED INTO THE PATIENT'S LEFT EYE (OS) ON (B)(6)2013. ON(B)(6)2022 , LOW VAULT AND REFRACTIVE CHANGE OVERTIME WAS OBSERVED. LENS REMAINS IMPLANTED. Manufacturer Narrative: ADDITIONAL DATA: B5: "ON (B)(6) 2022, THE LENS WAS EXCHANGED WITH A DIFFERENT MODEL/LONGER LENGTH LENS AND THE PROB…	Lens Exchange	Unknown
https://www.accessdata.fda.gov/scripts/cdrh/cfdocs/cfMAUDE/Detail.CFM?MDRFOI__ID=14059294&pc=MTA	2023826-2022-01159	NA	Malfunction	STAAR SURGICAL COMPANY	2022-04-08 04:00:00	MTA	IMPLANTABLE COLLAMER LENS (ICL)	Misfocusing; Inadequacy of Device Shape and/or Size	Blurred Vision; No Clinical Signs, Symptoms or Conditions	NA	NA	1	Event Description: THE REPORTER INDICATED THAT THE SURGEON IMPLANTED A IMPLANTABLE COLLAMER LENS INTO THE PATIENT'S LEFT EYE (OS). THE PATIENT EXPERIENCED LOW VAULTING. LENS REMAINS IMPLANTED. ATTEMPTS TO OBTAIN ADDITIONAL INFORMATION HAVE NOT BEEN SUCCESSFUL. IF ADDITIONAL INFORMATION IS RECEIVED A SUPPLEMENTAL MEDWATCH REPORT WILL BE SUBMITTED. Manufacturer Narrative: ADDITIONAL INFORMATION: B5…	Lens Retention	Unknown
https://www.accessdata.fda.gov/scripts/cdrh/cfdocs/cfMAUDE/Detail.CFM?MDRFOI__ID=15298674&pc=MTA	2023826-2022-02908	NA	Malfunction	STAAR SURGICAL COMPANY	2022-08-25 04:00:00	MTA	IMPLANTABLE COLLAMER LENS (ICL)	Misfocusing; Inadequacy of Device Shape and/or Size	Blurred Vision; No Clinical Signs, Symptoms or Conditions	NA	NA	1	Event Description: THE REPORTER INDICATED THAT A 12.0MM ICM120V4 IMPLANTABLE COLLAMER LENS OF -13.0 DIOPTER WAS IMPLANTED INTO THE PATIENT'S RIGHT EYE (OD) ON (B)(6) 2013. THE PATIENT EXPERIENCED LOW VAULT AND REFRACTIVE CHANGE OVERTIME, LENS REMAINS IMPLANTED. IF ADDITIONAL INFORMATION IS RECEIVED A SUPPLEMENTAL MEDWATCH REPORT WILL BE SUBMITTED. Manufacturer Narrative: EXPIRATION DATE: 11/30/20…	Lens Retention	Unknown
https://www.accessdata.fda.gov/scripts/cdrh/cfdocs/cfMAUDE/Detail.CFM?MDRFOI__ID=15298880&pc=MTA	2023826-2022-02909	NA	Malfunction	STAAR SURGICAL COMPANY	2022-08-25 04:00:00	MTA	IMPLANTABLE COLLAMER LENS (ICL)	Misfocusing; Inadequacy of Device Shape and/or Size	Blurred Vision; No Clinical Signs, Symptoms or Conditions	NA	NA	1	Event Description: THE REPORTER INDICATED THAT A 11.5MM ICM115V4 IMPLANTABLE COLLAMER LENS OF -13.5 DIOPTER WAS IMPLANTED INTO THE PATIENT'S LEFT EYE (OS) ON (B)(6) 2013. THE PATIENT EXPERIENCED LOW VAULT AND REFRACTIVE CHANGE OVERTIME, LENS REMAINS IMPLANTED. IF ADDITIONAL INFORMATION IS RECEIVED A SUPPLEMENTAL MEDWATCH REPORT WILL BE SUBMITTED. Manufacturer Narrative: CORRECTED DATA: H6 HEALTH …	Lens Retention	Unknown
https://www.accessdata.fda.gov/scripts/cdrh/cfdocs/cfMAUDE/Detail.CFM?MDRFOI__ID=16691191&pc=MTA	2023826-2023-01211	2023-01-14	Injury	STAAR SURGICAL COMPANY	2023-04-06	MTA	IMPLANTABLE COLLAMER LENS (ICL)	Misfocusing; Inadequacy of Device Shape and/or Size; Device Dislodged or Dislocated; Adverse Event Without Identified Device or Use Problem	Blurred Vision; No Clinical Signs, Symptoms or Conditions	P030016	NA	1	Event Description: THE REPORTER INDICATED THAT A 12.6MM VICMO_12.6 IMPLANTABLE COLLAMER LENS -15.00 DIOPTER WAS IMPLANTED INTO THE PATIENT'S LEFT EYE (OS) ON (B)(6) 2032 AS A REPLACEMENT LENS TO ADDRESS LOW VAULT WITH ROTATION BUT IT DID NOT RESOLVE THE PROBLEM. ON (B)(6) 2023 THE LENS WAS EXCHANGED FOR A LONGER LENGTH LENS DUE TO LOW VAULT AND LENS ROTATION AND THE PROBLEM RESOLVED. CAUSE OF EVE…	Lens Exchange	Resolved
https://www.accessdata.fda.gov/scripts/cdrh/cfdocs/cfMAUDE/Detail.CFM?MDRFOI__ID=12806826&pc=MTA	2023826-2021-04330	2021-09-28	Injury	STAAR SURGICAL COMPANY	2021-11-12	MTA	IMPLANTABLE COLLAMER LENS (ICL)	Misfocusing; Off-Label Use; Inadequacy of Device Shape and/or Size	Blurred Vision; No Clinical Signs, Symptoms or Conditions	NA	NA	1	Event Description: THE REPORTER INDICATED THAT THE SURGEON IMPLANTED A 12.6MM VICMO12.6; -9.0 DIOPTER IMPLANTABLE COLLAMER LENS INTO THE PATIENT'S RIGHT EYE (OD) ON (B)(6) 2021. ON (B)(6) 2021 THE LENS WAS EXCHANGED WITH A LONGER LENGTH LENS DUE TO LOW VAULTING AND REFRACTIVE SURPRISE. THIS RESOLVED THE PROBLEM. THE CAUSE OF THE EVENT WAS REPORTED AS UNKNOWN. Manufacturer Narrative: THIS PRODUCT …	Lens Exchange	Resolved
https://www.accessdata.fda.gov/scripts/cdrh/cfdocs/cfMAUDE/Detail.CFM?MDRFOI__ID=15821272&pc=MTA	2023826-2022-03964	2022-08-08	Injury	STAAR SURGICAL COMPANY	2022-11-17	MTA	IMPLANTABLE COLLAMER LENS (ICL)	Misfocusing; Off-Label Use; Inadequacy of Device Shape and/or Size	Blurred Vision; No Clinical Signs, Symptoms or Conditions	P030016	NA	1	Event Description: THE REPORTER INDICATED THAT A 12.6MM VICMO12.6 IMPLANTABLE COLLAMER LENS WITH A -9.0 DIOPTER WAS IMPLANTED INTO THE PATIENT'S RIGHT EYE (OD) ON (B)(6) 2022. ON (B)(6) 2022, THE LENS WAS EXCHANGED FOR A LONGER LENGTH LENS DUE TO LOW VAULT WITHOUT ROTATION AND REFRACTIVE SUPRISE. THE PROBLEM WAS NOT RESOLVED. CAUSE IS REPORTED AS UNKNOWN. REPORTEDLY, "DUE TO THE PATIENT'S DIFFICU…	Lens Exchange	Not_Resolved
https://www.accessdata.fda.gov/scripts/cdrh/cfdocs/cfMAUDE/Detail.CFM?MDRFOI__ID=11119844&pc=MTA	2023826-2021-00022	2020-12-05	Injury	STAAR SURGICAL COMPANY AG	2021-01-05	MTA	IMPLANTABLE COLLAMER LENS (ICL)	Misfocusing; Off-Label Use; Inadequacy of Device Shape and/or Size; Patient-Device Incompatibility	Blurred Vision; No Clinical Signs, Symptoms or Conditions	NA#S-P#NA	NA	1	Event Description: THE REPORTER INDICATED THE SURGEON IMPLANTED A 12.0MM ICM120V4 IMPLANTABLE COLLAMER LENS, -07.50 DIOPTER, IN THE PATIENTS LEFT EYE (OS), ON (B)(6) 2008. THE LENS WAS REPORTED AS HAVING LOW VAULTING. THE LENS REMAINED IMPLANTED. THE PLAN IS TO EXPLANT AND EXCHANGE. ADDITIONAL INFORMATION HAS BEEN REQUESTED BUT NONE HAS BEEN FORTHCOMING. IF ADDITIONAL INFORMATION IS RECEIVED, A S…	Lens Exchange	Resolved
https://www.accessdata.fda.gov/scripts/cdrh/cfdocs/cfMAUDE/Detail.CFM?MDRFOI__ID=11119845&pc=MTA	2023826-2021-00021	2020-12-05	Injury	STAAR SURGICAL COMPANY AG	2021-01-05	MTA	IMPLANTABLE COLLAMER LENS (ICL)	Misfocusing; Off-Label Use; Inadequacy of Device Shape and/or Size; Patient-Device Incompatibility	Blurred Vision; No Clinical Signs, Symptoms or Conditions	NA#S-P#NA	NA	1	Event Description: THE REPORTER INDICATED THE SURGEON IMPLANTED A 12.0MM ICM120V4 IMPLANTABLE COLLAMER LENS, -08.00 DIOPTER, IN THE PATIENTS RIGHT EYE (OD), ON (B)(6) 2008. THE LENS WAS REPORTED AS HAVING LOW VAULTING. THE LENS REMAINED IMPLANTED. THE PLAN IS TO EXPLANT AND EXCHANGE. ADDITIONAL INFORMATION HAS BEEN REQUESTED BUT NONE HAS BEEN FORTHCOMING. IF ADDITIONAL INFORMATION IS RECEIVED, A …	Lens Exchange	Resolved
https://www.accessdata.fda.gov/scripts/cdrh/cfdocs/cfMAUDE/Detail.CFM?MDRFOI__ID=15673922&pc=MTA	2023826-2022-03635	2022-03-18	Injury	STAAR SURGICAL COMPANY	2022-10-26	MTA	IMPLANTABLE COLLAMER LENS (ICL)	Off-Label Use; Inadequacy of Device Shape and/or Size	Blurred Vision; No Clinical Signs, Symptoms or Conditions	P030016	NA	1	Event Description: THE REPORTER INDICATED THAT A 12.1MM VICMO12.1 IMPLANTABLE COLLAMER LENS OF -14.0 DIOPTER WAS IMPLANTED INTO THE PATIENT'S RIGHT EYE (OD) ON (B)(6) 2022. ON (B)(6) 2022, THE LENS WAS EXCHANGED FOR A LONGER LENGTH LENS DUE TO LOW VAULT WITHOUT ROTATION. THE PROBLEM WAS RESOLVED. CAUSE REPORTED AS UNKNOWN. Manufacturer Narrative: WEIGHT: UNK, ETHNICITY: UNK, RACE: UNK. OFF LABEL …	Lens Exchange	Resolved
https://www.accessdata.fda.gov/scripts/cdrh/cfdocs/cfMAUDE/Detail.CFM?MDRFOI__ID=6796051&pc=MTA	2023826-2017-01254	2017-04-21	Injury	STAAR SURGICAL COMPANY	2017-08-15	MTA	IMPLANTABLE COLLAMER LENS (ICL)	Adverse Event Without Identified Device or Use Problem	Blurred Vision; No Code Available	NA	NA	1	Event Description: THE REPORTER INDICATED THE SURGEON IMPLANTED A 12.1MM VICM5_12.1 IMPLANTABLE COLLAMER LENS, -13.50 DIOPTER, IN THE PATIENT'S RIGHT EYE (OD) ON (B)(6) 2017. THE LENS WAS EXPLANTED ON (B)(6) 2017 DUE TO A REFRACTIVE SURPRISE. THE LENS WAS EXCHANGED FOR ANOTHER SAME MODEL/LENGTH BUT DIFFERENT DIOPTER LENS AND THE PROBLEM WAS RESOLVED. THE PATIENT'S POST-OP BEST CORRECTED VISUAL AC…	Lens Exchange	Resolved
https://www.accessdata.fda.gov/scripts/cdrh/cfdocs/cfMAUDE/Detail.CFM?MDRFOI__ID=7928358&pc=MTA	2023826-2018-01437	2018-07-11	Injury	STAAR SURGICAL COMPANY	2018-10-02	MTA	IMPLANTABLE COLLAMER LENS (ICL)	Adverse Event Without Identified Device or Use Problem	Blurred Vision; No Code Available	NA	NA	1	Event Description: THE REPORTER INDICATED THE SURGEON IMPLANTED A 12.1MM VICMO12.1 IMPLANTABLE COLLAMER LENS, -10.00 DIOPTER, IN THE PATIENT'S LEFT EYE (OS) ON (B)(6) 2018. THE LENS WAS EXPLANTED ON (B)(6) 2018 DUE TO THE PATIENT REPORTED HER NEAR VISION WAS POOR. THE PATIENT COULDN'T SEE CLEARLY FROM CLOSE (40CM), SO SHE REQUESTED TO REMOVE THE ICL LENS AND DIDN'T WANT ANOTHER LENS IMPLANTED. TH…	Lens Extraction	Unknown
https://www.accessdata.fda.gov/scripts/cdrh/cfdocs/cfMAUDE/Detail.CFM?MDRFOI__ID=8254835&pc=MTA	2023826-2019-00097	NA	Injury	STAAR SURGICAL COMPANY	2019-01-16 05:00:00	MTA	IMPLANTABLE COLLAMER LENS (ICL)	Adverse Event Without Identified Device or Use Problem	Blurred Vision; No Code Available	NA	NA	1	Event Description: THE REPORTER INDICATED THAT THE SURGEON IMPLANTED A 13.2MM VICMO13.2 IMPLANTABLE COLLAMER LENS, -2.5 DIOPTER, INTO THE PATIENT'S RIGHT EYE (OD) ON (B)(6) 2014. ON (B)(6) 2018 THE LENS WAS EXCHANGED WITH A DIFFERENT MODEL AND DIOPTER LENS DUE REFRACTIVE SURPRISE AND REFRACTIVE CHANGE OVER TIME. THE PROBLEM WAS RESOLVED. THE CAUSE OF THE EVENT IS REPORTED AS UNKNOWN. Manufacturer…	Unknown	Unknown
https://www.accessdata.fda.gov/scripts/cdrh/cfdocs/cfMAUDE/Detail.CFM?MDRFOI__ID=4949670&pc=MTA	2023826-2015-00894	2015-05-28	Injury	STAAR SURGICAL COMPANY	2015-07-29	MTA	ICL (IMPLANTABLE COLLAMER LENS)	Appropriate Term/Code Not Available	Blurred Vision; No Code Available	P030016	NA	1	Event Description: THE REPORTER INDICATED THE SURGEON IMPLANTED A 13.2MM VICM13.2 IMPLANTABLE COLLAMER LENS IN THE PATIENT'S LEFT EYE (OS) ON (B)(6) 2015. THE LENS WAS EXPLANTED ON (B)(6) 2015 DUE TO BLURRED VISION. THE LENS WAS EXCHANGED FOR ANOTHER SAME MODEL BUT DIFFERENT DIOPTER LENS. THE PROBLEM WAS RESOLVED. THE PATIENT RECOVERED WELL AND IS SATISFIED WITH THE RESULT. Manufacturer Narrative…	Lens Exchange	Resolved
https://www.accessdata.fda.gov/scripts/cdrh/cfdocs/cfMAUDE/Detail.CFM?MDRFOI__ID=5244431&pc=MTA	2023826-2015-01536	2015-07-13	Injury	STAAR SURGICAL COMPANY	2015-11-23	MTA	ICL (IMPLANTABLE COLLAMER LENS)	Appropriate Term/Code Not Available	Blurred Vision; No Code Available	NA	NA	1	Event Description: THE REPORTER INDICATED THE SURGEON IMPLANTED A 13.2MM VICMO13.2, -16.00 DIOPTER IMPLANTABLE COLLAMER LENS IN THE PATIENT'S RIGHT EYE (OD) ON (B)(6) 2015. REFRACTIVE SURPRISE WAS NOTED ON (B)(6) 2015. THE ICL WAS EXPLANTED ON (B)(6) 2015 AND EXCHANGED FOR A SIMILAR LENS MODEL WITH DIFFERENT DIOPTER SIZE. THIS RESOLVED THE PROBLEM. POST-OP VISIT ON (B)(6) 2015, UCVA WAS 20/20. Ma…	Lens Exchange	Resolved
https://www.accessdata.fda.gov/scripts/cdrh/cfdocs/cfMAUDE/Detail.CFM?MDRFOI__ID=7161172&pc=MTA	2023826-2018-00004	2017-11-23	Injury	STAAR SURGICAL COMPANY	2018-01-03	MTA	IMPLANTABLE COLLAMER LENS (ICL)	Device Contamination with Chemical or Other Material	Blurred Vision; No Code Available	N/A	NA	1	Event Description: THE REPORTER INDICATED THAT THE SURGEON IMPLANTED A 13.2 MM VICM5_13.2, -5.0 DIOPTER, IMPLANTABLE COLLAMER LENS IN THE PATIENT'S LEFT EYE (OS) (B)(6) 2017. ON (B)(6) 2017, THE LENS WAS EXPLANTED DUE TO BLURRED VISION AND WHITE MATERIAL ON THE LENS. ON (B)(6) 2017, THE PATIENT'S BCVA WAS 20/13. Manufacturer Narrative: DEVICE AVAILABLE FOR EVALUATION: THE DEVICE WAS RETURNED TO T…	Lens Extraction	Unknown
https://www.accessdata.fda.gov/scripts/cdrh/cfdocs/cfMAUDE/Detail.CFM?MDRFOI__ID=6465367&pc=MTA	2023826-2017-00586	2015-08-13	Injury	STAAR SURGICAL COMPANY	2017-04-06	MTA	ICL (IMPLANTABLE COLLAMER LENS)	Device Operates Differently Than Expected	Blurred Vision; No Code Available	N/A	NA	1	Event Description: THE REPORTER INDICATED THAT THE SURGEON IMPLANTED A 12.6MM VICMO12.6 IMPLANTABLE COLLAMER LENS, -14 DIOPTER, IN THE PATIENT'S LEFT EYE (OS). THE PATIENT EXPERIENCED REFRACTIVE CHANGE OVERTIME. ON (B)(6) 2015, THE LENS WAS EXCHANGED FOR THE SAME SIZE AND DIOPTER. THE PROBLEM WAS RESOLVED. AS OF THE DAY OF MDR SUBMISSION, THE LENS HAS BEEN RETURNED, BUT NOT YET EVALUATED. Manufac…	Lens Exchange	Resolved
https://www.accessdata.fda.gov/scripts/cdrh/cfdocs/cfMAUDE/Detail.CFM?MDRFOI__ID=7205788&pc=MTA	2023826-2018-00104	2015-11-25	Injury	STAAR SURGICAL COMPANY	2018-01-19	MTA	IMPLANTABLE COLLAMER LENS (ICL)	Device Operates Differently Than Expected	Blurred Vision; No Code Available	NA	NA	1	Event Description: THE REPORTER INDICATED THAT THE SURGEON IMPLANTED A 13.2 MM VICMO13.2, -7.50 DIOPTER, IMPLANTABLE COLLAMER LENS IN THE PATIENT'S RIGHT EYE (OD) ON (B)(6) 2015. REFRACTIVE SURPRISE WAS OBSERVED. THE LENS REMAINS IMPLANTED IN THE EYE. ADDITIONAL INFORMATION HAS BEEN REQUESTED BUT NONE HAS BEEN FORTHCOMING. IF ADDITIONAL INFORMATION IS RECEIVED, A SUPPLEMENTAL MEDWATCH REPORT WILL…	Lens Exchange	Resolved
https://www.accessdata.fda.gov/scripts/cdrh/cfdocs/cfMAUDE/Detail.CFM?MDRFOI__ID=6197059&pc=MTA	2023826-2016-01802	2016-07-03	Injury	STAAR SURGICAL COMPANY	2016-12-21	MTA	ICL (IMPLANTABLE COLLAMER LENS)	Device Operates Differently Than Expected	Blurred Vision; No Code Available	N/A	NA	1	Event Description: THE REPORTER INDICATED THAT THE SURGEON IMPLANTED A 12.6 MM VICMO12.6 IMPLANTABLE COLLAMER LENS, -10.0 DIOPTER IN THE PATIENT'S LEFT EYE (OS) ON (B)(6) 2016. THE LENS WAS EXPLANTED ON (B)(6) 2016 DUE TO REFRACTIVE SURPRISE. THE LENS WAS EXCHANGED FOR A LENS THE SAME SIZE, MODEL, BUT A DIFFERENT DIOPTER AND THE PROBLEM WAS RESOLVED. THE PATIENT'S POST-OP UNCORRECTED VISUAL ACUIT…	Lens Exchange	Resolved
https://www.accessdata.fda.gov/scripts/cdrh/cfdocs/cfMAUDE/Detail.CFM?MDRFOI__ID=6993869&pc=MTA	2023826-2017-01661	2016-11-17	Injury	STAAR SURGICAL COMPANY	2017-11-01	MTA	IMPLANTABLE COLLAMER LENS	Device Operates Differently Than Expected	Blurred Vision; No Code Available	N/A	NA	1	Event Description: REPORTEDLY, THE SURGEON IMPLANTED A 13.2MM VICMO13.2 DIOPTER -15.50 DIOPTER INTO THE PATIENT'S EYE ON (B)(6) 2016. THE SURGEON NOTES A REFRACTIVE SURPRISE. THE LENS REMAINS IMPLANTED, PLANS TO BE EXCHANGED. ATTEMPTS TO OBTAIN ADDITIONAL INFORMATION HAVE NOT BEEN SUCCESSFUL. Manufacturer Narrative: (B)(4). Manufacturer Narrative: THE LENS WAS EXPLANTED. (B)(4) Manufacturer Narra…	Lens Extraction	Unknown
https://www.accessdata.fda.gov/scripts/cdrh/cfdocs/cfMAUDE/Detail.CFM?MDRFOI__ID=7200518&pc=MTA	2023826-2018-00100	2016-11-21	Injury	STAAR SURGICAL COMPANY	2018-01-17	MTA	IMPLANTABLE COLLAMER LENS (ICL)	Device Operates Differently Than Expected	Blurred Vision; No Code Available	NA	NA	1	Event Description: THE REPORTER INDICATED THE SURGEON IMPLANTED A 12.1MM VICMO12.1 IMPLANTABLE COLLAMER LENS, -01.00 DIOPTER, IN THE PATIENT'S RIGHT EYE (OD) ON (B)(6) 2016. THE SURGEON NOTED A REFRACTIVE SURPRISE AND PLANS TO EXPLANT AND EXCHANGE THE LENS BUT TO DATE THE LENS REMAINS IMPLANTED. Manufacturer Narrative: THE REPORTER INDICATED THAT THE SURGEON IMPLANTED A 12.1MM VICMO12.1 IMPLANTAB…	Lens Exchange	Not_Resolved
https://www.accessdata.fda.gov/scripts/cdrh/cfdocs/cfMAUDE/Detail.CFM?MDRFOI__ID=6801614&pc=MTA	2023826-2017-01300	2017-01-18	Injury	STAAR SURGICAL COMPANY	2017-08-17	MTA	IMPLANTABLE COLLAMER LENS	Device Operates Differently Than Expected	Blurred Vision; No Code Available	N/A	NA	1	Event Description: THE REPORTER STATED THAT THE SURGEON IMPLANTED A 13.2 MM VICM5_13.2, -7.5 DIOPTER, IMPLANTABLE COLLAMER LENS ON (B)(6)2017. THE PATIENT EXPERIENCED REFRACTIVE SURPRISE, SO THE LENS WAS EXPLANTED ON (B)(6)2017 AND WAS REPLACED WITH THE SAME MODEL LENS BUT WITH A -8.5 DIOPTER. THIS RESOLVED THE PROBLEM. Manufacturer Narrative: (B)(4). Manufacturer Narrative: DEVICE EVALUATION- DI…	Lens Exchange	Resolved
https://www.accessdata.fda.gov/scripts/cdrh/cfdocs/cfMAUDE/Detail.CFM?MDRFOI__ID=6918306&pc=MTA	2023826-2017-01535	2017-01-19	Injury	STAAR SURGICAL COMPANY	2017-10-05	MTA	IMPLANTABLE COLLAMER LENS	Device Operates Differently Than Expected	Blurred Vision; No Code Available	N/A	NA	1	Event Description: THE REPORTER STATED THAT THE SURGEON IMPLANTED A 13.7MM VICMO13.7 DIOPTER -11.0 DIOPTER INTO THE PATIENT'S RIGHT EYE (OD) ON (B)(6) 2017. ON (B)(6) 2017, THE SURGEON EXPLANTED THE LENS DUE TO REFRACTIVE SURPRISE. ATTEMPTS TO OBTAIN ANY FURTHER INFORMATION HAVE BEEN UNSUCCESSFUL. Manufacturer Narrative: ON (B)(6) 2017, THE CLAIMANT DISCLOSED THE SERIAL NUMBER FOR THE ASSOCIATED …	Lens Extraction	Unknown
https://www.accessdata.fda.gov/scripts/cdrh/cfdocs/cfMAUDE/Detail.CFM?MDRFOI__ID=7398191&pc=MTA	2023826-2018-01499	2017-01-23	Injury	STAAR SURGICAL COMPANY	2018-04-04	MTA	IMPLANTABLE COLLAMER LENS (ICL)	Device Operates Differently Than Expected	Blurred Vision; No Code Available	N/A	NA	1	Event Description: THE REPORTER INDICATED THAT THE SURGEON IMPLANTED A 13.7 MM VICM5_13.7, -12.00 DIOPTER, IMPLANTABLE COLLAMER LENS IN THE PATIENT'S LEFT EYE (OS) ON (B)(6) 2017. REFRACTIVE SURPRISE WAS NOTICED. THE LENS REMAINS IMPLANTED. A LENS EXCHANGE IS PLANNED. Manufacturer Narrative: THE LENS WAS EXPLANTED AND EXCHANGED. THE PROBLEM WAS RESOLVED AND "THE PATIENT IS REALLY HAPPY". (B)(4) M…	Lens Exchange	Resolved
https://www.accessdata.fda.gov/scripts/cdrh/cfdocs/cfMAUDE/Detail.CFM?MDRFOI__ID=6648555&pc=MTA	2023826-2017-00993	2017-01-25	Injury	STAAR SURGICAL COMPANY	2017-06-16	MTA	IMPLANTABLE COLLAMER LENS (ICL)	Device Operates Differently Than Expected	Blurred Vision; No Code Available	NA	NA	1	Event Description: THE REPORTER INDICATED THAT THE SURGEON IMPLANTED A 12.5MM ICM125V4 IMPLANTABLE COLLAMER LENS, -11.0 DIOPTER, INTO THE PATIENT'S RIGHT EYE (OD) ON (B)(6) 2011. ON (B)(6) 2017, THE LENS WAS EXCHANGED WITH A LONGER AND DIFFERENT DIOPTER LENS, DUE TO REFRACTIVE CHANGE OVER TIME. THE PROBLEM WAS RESOLVED. AS OF THE DATE OF MDR SUBMISSION, THE LENS HAS BEEN RETURNED BUT NOT YET EVAL…	Lens Exchange	Resolved
https://www.accessdata.fda.gov/scripts/cdrh/cfdocs/cfMAUDE/Detail.CFM?MDRFOI__ID=6651664&pc=MTA	2023826-2017-00994	2017-01-25	Injury	STAAR SURGICAL COMPANY	2017-06-19	MTA	IMPLANTABLE COLLAMER LENS (ICL)	Device Operates Differently Than Expected	Blurred Vision; No Code Available	NA	NA	1	Event Description: THE REPORTER INDICATED THAT THE SURGEON IMPLANTED A 12.5MM ICM125V4 IMPLANTABLE COLLAMER LENS, -11.0 DIOPTER, INTO THE PATIENT'S LEFT EYE (OS) ON (B)(6) 2011. ON (B)(6) 2017, THE LENS WAS EXCHANGED WITH A LONGER AND DIFFERENT DIOPTER LENS, DUE TO REFRACTIVE CHANGE OVER TIME. THE PROBLEM WAS RESOLVED. AS OF THE DATE OF MDR SUBMISSION, THE LENS HAS BEEN RETURNED BUT NOT YET EVALU…	Lens Exchange	Resolved
https://www.accessdata.fda.gov/scripts/cdrh/cfdocs/cfMAUDE/Detail.CFM?MDRFOI__ID=6388842&pc=MTA	2023826-2017-00317	2017-02-01	Injury	STAAR SURGICAL COMPANY	2017-03-08	MTA	ICL (IMPLANTABLE COLLAMER LENS)	Device Operates Differently Than Expected	Blurred Vision; No Code Available	N/A	NA	1	Event Description: THE REPORTER INDICATED THAT THE SURGEON IMPLANTED A 13.2 MM VICM5_13.2 IMPLANTABLE COLLAMER LENS, -2.25 DIOPTER, IN THE PATIENT'S RIGHT EYE (OD) ON (B)(6) 2017. ON (B)(6) 2017 THE PATIENT EXPERIENCED REFRACTIVE SURPRISE, THE LENS WAS EXCHANGED. AS OF THE DAY OF MDR SUBMISSION, THE LENS HAS NOT BEEN RETURNED. Manufacturer Narrative: ADDITIONAL INFORMATION: THE REPORTER INDICATED…	Lens Exchange	Unknown
https://www.accessdata.fda.gov/scripts/cdrh/cfdocs/cfMAUDE/Detail.CFM?MDRFOI__ID=6402737&pc=MTA	2023826-2017-00376	2017-02-10	Injury	STAAR SURGICAL COMPANY	2017-03-14	MTA	IMPLANTABLE COLLAMER LENS (ICL)	Device Operates Differently Than Expected	Blurred Vision; No Code Available	P030016	NA	1	Event Description: THE REPORTER STATED THAT A 13.2MM MICL13.2 IMPLANTABLE COLLAMER LENS, -10.5 DIOPTER, WAS EXPLANTED AND REPLACED WITH A LESSER POWER ICL DUE TO HYPEROPIC RESULT . THERE WAS NO PATIENT INJURY AND THE CAUSE OF THE EVENT WAS UNKNOWN. THE UCVA AFTER ICL EXCHANGE WAS 20/20-2. Manufacturer Narrative: (B)(4). Manufacturer Narrative: (B)(4). Manufacturer Narrative: DEVICE EVALUATION : L…	Lens Exchange	Resolved
https://www.accessdata.fda.gov/scripts/cdrh/cfdocs/cfMAUDE/Detail.CFM?MDRFOI__ID=6717761&pc=MTA	2023826-2017-01197	2017-02-20	Injury	STAAR SURGICAL COMPANY	2017-07-17	MTA	IMPLANTABLE COLLAMER LENS	Device Operates Differently Than Expected	Blurred Vision; No Code Available	N/A	NA	1	Event Description: THE REPORTER INDICATED THAT THE SURGEON IMPLANTED A 13.2 MM VICMO13.2 IMPLANTABLE COLLAMER LENS, -16.5 DIOPTER, IN THE PATIENT'S LEFT EYE (OS) ON (B)(6) 2017. THE LENS WAS EXPLANTED ON (B)(6) 2017 DUE TO REFRACTIVE SURPRISE. THE LENS WAS EXCHANGED FOR A SIMILAR SIZE LENS OF A DIFFERENT DIOPTER. THE PROBLEM WAS RESOLVED. ON (B)(6) 2017, THE PATIENT'S POST-OP BEST CORRECTED VISUA…	Lens Exchange	Resolved
https://www.accessdata.fda.gov/scripts/cdrh/cfdocs/cfMAUDE/Detail.CFM?MDRFOI__ID=6721360&pc=MTA	2023826-2017-01191	2017-02-20	Injury	STAAR SURGICAL COMPANY	2017-07-18	MTA	IMPLANTABLE COLLAMER LENS (ICL)	Device Operates Differently Than Expected	Blurred Vision; No Code Available	NA	NA	1	Event Description: THE REPORTER INDICATED THAT THE SURGEON IMPLANTED A 13.2MM VICMO13.2 IMPLANTABLE COLLAMER LENS, -16.0 DIOPTER, IN THE PATIENT'S RIGHT EYE (OD) ON (B)(6) 2017. THE PATIENT EXPERIENCED REFRACTIVE SURPRISE. THE LENS WAS EXPLANTED ON (B)(6) 2017 AND THE LENS WAS EXCHANGED FOR A SIMILAR SIZE LENS OF A DIFFERENT DIOPTER. THE PROBLEM WAS RESOLVED. ON (B)(6) 2017 THE PATIENT'S POST-OP …	Lens Exchange	Resolved
https://www.accessdata.fda.gov/scripts/cdrh/cfdocs/cfMAUDE/Detail.CFM?MDRFOI__ID=6808731&pc=MTA	2023826-2017-01352	2017-04-03	Injury	STAAR SURGICAL COMPANY	2017-08-21	MTA	IMPLANTABLE COLLAMER LENS (ICL)	Device Operates Differently Than Expected	Blurred Vision; No Code Available	N/A	NA	1	Event Description: THE REPORTER INDICATED THAT THE SURGEON IMPLANTED A 12.6 MM VICMO12.6, -14.50 DIOPTER, IMPLANTABLE COLLAMER LENS IN THE PATIENT'S RIGHT EYE (OD) ON (B)(6) 2017. EXCESSIVE VAULT, REFRACTIVE SURPRISE, LOSS OF BCVA, SIGNIFICANT REDUCTION OF IRIDO-CORNEAL ANGLES, AND BLURRY VISION WAS NOTICED. THE LENS WAS REPOSITIONED ON (B)(6) 2017. THE LENS WAS EXCHANGED FOR A SHORTER LENS ON (B…	Lens Exchange	Resolved
https://www.accessdata.fda.gov/scripts/cdrh/cfdocs/cfMAUDE/Detail.CFM?MDRFOI__ID=6595444&pc=MTA	2023826-2017-00893	2017-04-26	Injury	STAAR SURGICAL COMPANY	2017-05-26	MTA	IMPLANTABLE COLLAMER LENS (ICL)	Device Operates Differently Than Expected	Blurred Vision; No Code Available	N/A	NA	1	Event Description: THE REPORTER INDICATED THAT THE SURGEON IMPLANTED A 13.2MM VICMO13.2, DIOPTER -6.0 IMPLANTABLE COLLAMER LENS, INTO THE PATIENT'S RIGHT EYE (OD) ON (B)(6) 2017. ON (B)(6) 2017 THE LENS WAS EXCHANGED WITH A SAME SIZE, DIFFERENT DIOPTER LENS DUE TO REFRACTIVE SURPRISE. THE PROBLEM WAS RESOLVED. AS OF THE DATE OF MDR REPORTING THE LENS HAS NOT YET BEEN RETURNED FOR EVALUATION. Manu…	Lens Exchange	Resolved
https://www.accessdata.fda.gov/scripts/cdrh/cfdocs/cfMAUDE/Detail.CFM?MDRFOI__ID=6670093&pc=MTA	2023826-2017-01029	2017-05-05	Injury	STAAR SURGICAL COMPANY	2017-06-27	MTA	ICL (IMPLANTABLE COLLAMER LENS)	Device Operates Differently Than Expected	Blurred Vision; No Code Available	N/A	NA	1	Event Description: THE REPORTER INDICATED THAT THE SURGEON IMPLANTED A 13.2 MM VICM5_13.2 IMPLANTABLE COLLAMER LENS, -13.00 DIOPTER, IN THE PATIENT'S LEFT EYE (OS) ON (B)(6) 2017. THE PATIENT EXPERIENCED REFRACTIVE SURPRISE. ON (B)(6) 2017 THE LENS WAS EXCHANGED FOR THE SAME SIZE AND DIFFERENT POWER, THE PROBLEM WAS RESOLVED. AS OF THE DAY OF MDR SUBMISSION THE LENS HAS BEEN RETURNED, BUT NOT YET…	Lens Exchange	Resolved
https://www.accessdata.fda.gov/scripts/cdrh/cfdocs/cfMAUDE/Detail.CFM?MDRFOI__ID=6670109&pc=MTA	2023826-2017-01030	2017-05-05	Injury	STAAR SURGICAL COMPANY	2017-06-27	MTA	ICL (IMPLANTABLE COLLAMER LENS)	Device Operates Differently Than Expected	Blurred Vision; No Code Available	N/A	NA	1	Event Description: THE REPORTER INDICATED THAT THE SURGEON IMPLANTED A 13.2 MM VICM5_13.2 IMPLANTABLE COLLAMER LENS, -13.00 DIOPTER, IN THE PATIENT'S RIGHT EYE (OD) ON (B)(6) 2017. THE PATIENT EXPERIENCED REFRACTIVE SURPRISE. ON (B)(6) 2017 THE LENS WAS EXCHANGED FOR THE SAME SIZE AND DIFFERENT POWER LENS, THE PROBLEM WAS RESOLVED. AS OF THE DAY OF MDR SUBMISSION THE LENS HAS BEEN RETURNED, BUT N…	Lens Exchange	Resolved
https://www.accessdata.fda.gov/scripts/cdrh/cfdocs/cfMAUDE/Detail.CFM?MDRFOI__ID=7183462&pc=MTA	2023826-2018-00048	2017-05-12	Injury	STAAR SURGICAL COMPANY	2018-01-11	MTA	IMPLANTABLE COLLAMER LENS (ICL)	Device Operates Differently Than Expected	Blurred Vision; No Code Available	N/A	NA	1	Event Description: THE REPORTER INDICATED THAT THE SURGEON IMPLANTED A 12.6 MM VICMO12.6, -12.0 DIOPTER, IMPLANTABLE COLLAMER LENS IN THE PATIENT'S LEFT EYE (OS) ON 26 APR 2017. ON (B)(6) 2017, THE LENS WAS EXPLANTED DUE TO REFRACTIVE SURPRISE. THE LENS WAS THEN EXCHANGED FOR A DIFFERENT LENS AND THE PROBLEM WAS RESOLVED. Manufacturer Narrative: DEVICE EVALUATION: THE LENS WAS RETURNED DRY IN A M…	Lens Exchange	Resolved
https://www.accessdata.fda.gov/scripts/cdrh/cfdocs/cfMAUDE/Detail.CFM?MDRFOI__ID=7213916&pc=MTA	2023826-2018-00123	2017-05-15	Injury	STAAR SURGICAL COMPANY	2018-01-23	MTA	IMPLANTABLE COLLAMER LENS (ICL)	Device Operates Differently Than Expected	Blurred Vision; No Code Available	NA	NA	1	Event Description: THE REPORTER INDICATED THE SURGEON IMPLANTED A 12.6MM VICM5_12.6 IMPLANTABLE COLLAMER LENS, -08.00 DIOPTER, IN THE PATIENT'S LEFT EYE (OS) ON (B)(6) 2017. THE LENS WAS EXPLANTED ON (B)(6) 2017 DUE TO REFRACTIVE CHANGE OVERTIME AND THE PATIENT WANTED THE LENS REMOVED DUE TO DECREASED VISUAL ACUITY. THE LENS WAS NOT EXCHANGED FOR ANOTHER LENS. THERE WAS NO PATIENT INJURY WHEN LEN…	Lens Extraction	Unknown
https://www.accessdata.fda.gov/scripts/cdrh/cfdocs/cfMAUDE/Detail.CFM?MDRFOI__ID=7213918&pc=MTA	2023826-2018-00122	2017-05-15	Injury	STAAR SURGICAL COMPANY	2018-01-23	MTA	IMPLANTABLE COLLAMER LENS (ICL)	Device Operates Differently Than Expected	Blurred Vision; No Code Available	NA	NA	1	Event Description: THE REPORTER INDICATED THE SURGEON IMPLANTED A 12.6 MM VICM5_12.6 IMPLANTABLE COLLAMER LENS, -09.00 DIOPTER, IN THE PATIENT'S RIGHT EYE (OD) ON (B)(6) 2017. THE LENS WAS EXPLANTED ON (B)(6) 2017 DUE TO REFRACTIVE CHANGE OVERTIME AND THE PATIENT WANTED THE LENS REMOVED DUE TO DECREASED VISUAL ACUITY. THE LENS WAS NOT EXCHANGED FOR ANOTHER LENS. THERE WAS NO PATIENT INJURY WHEN L…	Lens Extraction	Unknown
https://www.accessdata.fda.gov/scripts/cdrh/cfdocs/cfMAUDE/Detail.CFM?MDRFOI__ID=6653553&pc=MTA	2023826-2017-01005	2017-05-23	Injury	STAAR SURGICAL COMPANY	2017-06-20	MTA	ICL (IMPLANTABLE COLLAMER LENS)	Device Operates Differently Than Expected	Blurred Vision; No Code Available	N/A	NA	1	Event Description: THE REPORTER INDICATED THAT THE SURGEON IMPLANTED A 13.2MM VICMO13.2 IMPLANTABLE COLLAMER LENS, -12.00 DIOPTER, IN THE PATIENT'S LEFT EYE (OS) ON (B)(6) 2017. THE PATIENT EXPERIENCED REFRACTIVE SURPRISE. ON (B)(6) 2017 THE LENS WAS EXCHANGED. THE PROBLEM WAS RESOLVED. AT THE DATE OF MDR SUBMISSION, THE LENS HAS NOT BEEN RETURNED. Manufacturer Narrative: THE LENS WAS FOUND RETUR…	Lens Exchange	Resolved
https://www.accessdata.fda.gov/scripts/cdrh/cfdocs/cfMAUDE/Detail.CFM?MDRFOI__ID=6725514&pc=MTA	2023826-2017-01204	2017-06-15	Injury	STAAR SURGICAL COMPANY	2017-07-19	MTA	IMPLANTABLE COLLAMER LENS	Device Operates Differently Than Expected	Blurred Vision; No Code Available	NA	NA	1	Event Description: THE REPORTER INDICATED THAT THE SURGEON IMPLANTED A 13.2MM VICMO13.2 IMPLANTABLE COLLAMER LENS, -7.5 DIOPTER, INTO THE PATIENT'S LEFT EYE (OS) ON (B)(6) 2017. ON (B)(6) 2017 THE LENS WAS EXCHANGED FOR A SAME SIZED, SIMILAR DIOPTER LENS DUE TO REFRACTIVE SURPRISE. THE PROBLEM WAS RESOLVED. Manufacturer Narrative: PREVIOUS: THE LENS WAS EXCHANGED FOR SAME SIZE, SIMILAR DIOPTER. _…	Lens Exchange	Resolved
https://www.accessdata.fda.gov/scripts/cdrh/cfdocs/cfMAUDE/Detail.CFM?MDRFOI__ID=6993839&pc=MTA	2023826-2017-01659	2017-06-19	Injury	STAAR SURGICAL COMPANY	2017-11-01	MTA	IMPLANTABLE COLLAMER LENS	Device Operates Differently Than Expected	Blurred Vision; No Code Available	N/A	NA	1	Event Description: THE REPORTER STATED THAT THE SURGEON IMPLANTED A 13.7MM VICMO13.7 DIOPTER -11.00 DIOPTER INTO THE PATIENT'S RIGHT EYE (OD) ON (B)(6)2017. THE LENS WAS EXCHANGED FOR THE SAME SIZE, DIFFERENT DIOPTER LENS ON (B)(6) 2017, THE SURGEON REPORTING A REFRACTIVE SURPRISE. THE PROBLEM WAS RESOLVED. Manufacturer Narrative: DEVICE EVALUATION: THE LENS WAS RETURNED DRY, IN A LENS CASE/VIAL.…	Lens Exchange	Resolved
https://www.accessdata.fda.gov/scripts/cdrh/cfdocs/cfMAUDE/Detail.CFM?MDRFOI__ID=6725922&pc=MTA	2023826-2017-01216	2017-06-22	Injury	STAAR SURGICAL COMPANY	2017-07-19	MTA	IMPLANTABLE COLLAMER LENS (ICL)	Device Operates Differently Than Expected	Blurred Vision; No Code Available	N/A	NA	1	Event Description: THE REPORTER INDICATED THAT THE SURGEON IMPLANTED A 13.2MM VICMO13.2, DIOPTER -7.0 IMPLANTABLE COLLAMER LENS, INTO THE PATIENT'S RIGHT EYE (OD) ON (B)(6) 2017. ON (B)(6) 2017 THE LENS WAS EXCHANGED FOR A SAME SIZE, DIFFERENT DIOPTER AND TYPE LENS DUE TO THE PATIENT EXPERIENCING REFRACTIVE SURPRISE. THE PROBLEM WAS RESOLVED. Manufacturer Narrative: RETURNED PRODUCT EVALUATION FO…	Lens Exchange	Resolved
https://www.accessdata.fda.gov/scripts/cdrh/cfdocs/cfMAUDE/Detail.CFM?MDRFOI__ID=6874037&pc=MTA	2023826-2017-01445	2017-06-30	Injury	STAAR SURGICAL COMPANY	2017-09-18	MTA	IMPLANTABLE COLLAMER LENS (ICL)	Device Operates Differently Than Expected	Blurred Vision; No Code Available	N/A	NA	1	Event Description: THE REPORTER INDICATED THAT THE SURGEON IMPLANTED A 12.6 MM VICM5_12.6, -7.0 DIOPTER, IMPLANTABLE COLLAMER LENS IN THE PATIENT'S LEFT EYE (OS) ON (B)(6) 2017. ON (B)(6) 2017, THE LENS WAS EXPLANTED DUE TO REFRACTIVE SURPRISE AND FAR SIGHT TENDENCY. THE LENS WAS EXCHANGED FOR ANOTHER LENS, SAME MODEL BUT DIFFERENT DIOPTER, AND THE PROBLEM WAS RESOLVED. ON (B)(6) 2017, THE PATIEN…	Lens Exchange	Resolved
https://www.accessdata.fda.gov/scripts/cdrh/cfdocs/cfMAUDE/Detail.CFM?MDRFOI__ID=6908143&pc=MTA	2023826-2017-01500	2017-09-05	Injury	STAAR SURGICAL COMPANY	2017-10-02	MTA	IMPLANTABLE COLLAMER LENS (ICL)	Device Operates Differently Than Expected	Blurred Vision; No Code Available	N/A	NA	1	Event Description: THE REPORTER INDICATED THAT THE SURGEON IMPLANTED A 12.6 MM VICMO12.6, -9.5 DIOPTER, IMPLANTABLE COLLAMER LENS IN THE PATIENT'S LEFT EYE (OS) ON (B)(6) 2017. REFRACTIVE SURPRISE WAS NOTICED. THE LENS REMAINS IMPLANTED. Manufacturer Narrative: THE LENS WAS EXPLANTED ON 16 NOV 2017 AND EXCHANGED WITH A SAME MODEL BUT LOWER DIOPTER LENS. (B)(4). Manufacturer Narrative: DEVICE EVAL…	Lens Exchange	Unknown
https://www.accessdata.fda.gov/scripts/cdrh/cfdocs/cfMAUDE/Detail.CFM?MDRFOI__ID=7021358&pc=MTA	2023826-2017-01670	2017-09-05	Injury	STAAR SURGICAL COMPANY	2017-11-10	MTA	IMPLANTABLE COLLAMER LENS (ICL)	Device Operates Differently Than Expected	Blurred Vision; No Code Available	N/A	NA	1	Event Description: THE REPORTER INDICATED THAT THE SURGEON IMPLANTED A 13.2 MM VICMO13.2, -10.0 DIOPTER, IMPLANTABLE COLLAMER LENS IN THE PATIENT'S LEFT EYE (OS) ON (B)(6) 2017. THE LENS WAS EXPLANTED ON (B)(6) 2017 DUE TO LOSS OF BCVA. BCVA WENT FROM 20/25 TO 20/35. THE LENS WAS EXCHANGED FOR A SIMILAR LENS AND THE PROBLEM WAS RESOLVED. THE PATIENT'S POST-OP BCVA ON (B)(6) 2017 WAS 20/20. Manufa…	Lens Exchange	Resolved
https://www.accessdata.fda.gov/scripts/cdrh/cfdocs/cfMAUDE/Detail.CFM?MDRFOI__ID=7146627&pc=MTA	2023826-2017-01944	2017-09-12	Injury	STAAR SURGICAL COMPANY	2017-12-26	MTA	IMPLANTABLE COLLAMER LENS (ICL)	Device Operates Differently Than Expected	Blurred Vision; No Code Available	N/A	NA	1	Event Description: THE REPORTER INDICATED THAT THE SURGEON IMPLANTED A 12.6 MM VICMO12.6, -15.00 DIOPTER, IMPLANTABLE COLLAMER LENS IN THE PATIENT'S RIGHT EYE (OD) ON (B)(6) 2017. ON (B)(6) 2017, THE LENS WAS EXPLANTED DUE TO REFRACTIVE SURPRISE. THE LENS WAS +3.0D FROM THE TARGET. THE LENS WAS EXCHANGED FOR A SIMILAR LENS AND THE PROBLEM WAS RESOLVED. Manufacturer Narrative: METHOD: DEVICE HISTO…	Lens Exchange	Resolved
https://www.accessdata.fda.gov/scripts/cdrh/cfdocs/cfMAUDE/Detail.CFM?MDRFOI__ID=7183428&pc=MTA	2023826-2018-00050	2017-10-09	Injury	STAAR SURGICAL COMPANY	2018-01-11	MTA	IMPLANTABLE COLLAMER LENS (ICL)	Device Operates Differently Than Expected	Blurred Vision; No Code Available	N/A	NA	1	Event Description: THE REPORTER INDICATED THAT THE SURGEON IMPLANTED A 12.1 MM VICMO12.1, -14.50 DIOPTER, IMPLANTABLE COLLAMER LENS IN THE PATIENT'S RIGHT EYE (OD) ON (B)(6) 2017. ON (B)(6) 2017, THE LENS WAS EXPLANTED DUE TO BLURRED VISION AND IT RESOLVED THE PROBLEM. THERE IS NO PLANS IMPLANT ANOTHER LENS AS THE PATIENT WAS DISSATISFIED WITH THE BLURRED VISION. ON (B)(6) 2017, THE PATIENT'S BCV…	Lens Extraction	Resolved
https://www.accessdata.fda.gov/scripts/cdrh/cfdocs/cfMAUDE/Detail.CFM?MDRFOI__ID=7006958&pc=MTA	2023826-2017-01687	2017-10-13	Injury	STAAR SURGICAL COMPANY	2017-11-07	MTA	IMPLANTABLE COLLAMER LENS	Device Operates Differently Than Expected	Blurred Vision; No Code Available	NA	NA	1	Event Description: THE REPORTER INDICATED THAT THE SURGEON IMPLANTED A 13.2MM VICM5_13.2 IMPLANTABLE COLLAMER LENS, -10.5 DIOPTER, INTO THE PATIENT'S RIGHT EYE (OD) ON (B)(6) 2017. ON (B)(6) 2017 A REFRACTIVE SURPRISE WAS REPORTED BY THE SURGEON. THE LENS REMAINS IMPLANTED. Manufacturer Narrative: THE REPORTER INDICATED THAT THE SURGEON IMPLANTED A 13.2MM VICM5_13.2 IMPLANTABLE COLLAMER LENS -10.…	Lens Exchange	Resolved
https://www.accessdata.fda.gov/scripts/cdrh/cfdocs/cfMAUDE/Detail.CFM?MDRFOI__ID=7140439&pc=MTA	2023826-2017-01950	2017-10-16	Malfunction	STAAR SURGICAL COMPANY AG	2017-12-21	MTA	IMPLANTABLE COLLAMER LENS (ICL)	Device Operates Differently Than Expected	Blurred Vision; No Code Available	NA	NA	1	Event Description: THE REPORTER INDICATED THAT THE SURGEON IMPLANTED A 12.5MM ICM125V4 IMPLANTABLE COLLAMER LENS, -13.50 DIOPTER, IN THE PATIENTS RIGHT EYE (OD) ON (B)(6) 2005. THE PATIENT EXPERIENCED REFRACTIVE SURPRISE, REFRACTIVE CHANGE OVERTIME. IT WAS STATED THAT THE LENS REMAINS IMPLANTED, AND THE SURGEON PLANS TO EXCHANGE THE LENS TO RESOLVE THE PROBLEM. Manufacturer Narrative: THIS PRODUC…	Lens Retention	Unknown
https://www.accessdata.fda.gov/scripts/cdrh/cfdocs/cfMAUDE/Detail.CFM?MDRFOI__ID=7140505&pc=MTA	2023826-2017-01951	2017-10-16	Malfunction	STAAR SURGICAL COMPANY AG	2017-12-21	MTA	IMPLANTABLE COLLAMER LENS (ICL)	Device Operates Differently Than Expected	Blurred Vision; No Code Available	NA	NA	1	Event Description: THE REPORTER INDICATED THAT THE SURGEON IMPLANTED A 12.5MM ICM125V4 IMPLANTABLE COLLAMER LENS, -14.00 DIOPTER, IN THE PATIENTS LEFT EYE (OS) ON (B)(6) 2005. THE PATIENT EXPERIENCED REFRACTIVE SURPRISE, REFRACTIVE CHANGE OVERTIME. IT WAS STATED THAT THE LENS REMAINS IMPLANTED, AND THE SURGEON PLANS TO EXCHANGE THE LENS TO RESOLVE THE PROBLEM. Manufacturer Narrative: THIS PRODUCT…	Lens Retention	Unknown
https://www.accessdata.fda.gov/scripts/cdrh/cfdocs/cfMAUDE/Detail.CFM?MDRFOI__ID=7213955&pc=MTA	2023826-2018-00120	2017-11-10	Injury	STAAR SURGICAL COMPANY AG	2018-01-23	MTA	IMPLANTABLE COLLAMER LENS (ICL)	Device Operates Differently Than Expected	Blurred Vision; No Code Available	NA	NA	1	Event Description: THE REPORTER INDICATED THE SURGEON IMPLANTED A 11.5MM ICM115V4 IMPLANTABLE COLLAMER LENS, -12.5 DIOPTER, IN THE PATIENT'S RIGHT EYE (OD) ON (B)(6) 2012. THE LENS WAS EXPLANTED ON (B)(6) 2017 DUE TO REFRACTIVE CHANGE OVERTIME. THE LENS WAS EXCHANGED AND THE PROBLEM WAS RESOLVED. Manufacturer Narrative: DEVICE EVALUATION: PRODUCT EVALUATION FOUND THE LENS RETURNED DRY IN A MICRO …	Lens Exchange	Resolved
https://www.accessdata.fda.gov/scripts/cdrh/cfdocs/cfMAUDE/Detail.CFM?MDRFOI__ID=7213961&pc=MTA	2023826-2018-00121	2017-11-10	Injury	STAAR SURGICAL COMPANY AG	2018-01-23	MTA	IMPLANTABLE COLLAMER LENS (ICL)	Device Operates Differently Than Expected	Blurred Vision; No Code Available	NA	NA	1	Event Description: THE REPORTER INDICATED THE SURGEON IMPLANTED A 11.5MM ICM115V4 IMPLANTABLE COLLAMER LENS, -11.5 DIOPTER, IN THE PATIENT'S LEFT EYE (OS) ON (B)(6) 2012. THE LENS WAS EXPLANTED ON (B)(6) 2017 DUE TO REFRACTIVE CHANGE OVERTIME. THE LENS WAS EXCHANGED AND THE PROBLEM WAS RESOLVED. Manufacturer Narrative: DEVICE EVALUATION: THE PRODUCT WAS RETURNED DRY, IN A MICRO CENTRIFUGE VIAL. V…	Lens Exchange	Resolved
https://www.accessdata.fda.gov/scripts/cdrh/cfdocs/cfMAUDE/Detail.CFM?MDRFOI__ID=7343058&pc=MTA	2023826-2018-00427	2017-12-27	Injury	STAAR SURGICAL COMPANY	2018-03-15	MTA	IMPLANTABLE COLLAMER LENS (ICL)	Device Operates Differently Than Expected	Blurred Vision; No Code Available	NA	NA	1	Event Description: THE REPORTER INDICATED THAT THE SURGEON IMPLANTED A VICM5_13.2, -2.75 DIOPTER, IMPLANTABLE COLLAMER LENS IN THE PATIENT'S RIGHT EYE (OD) ON (B)(6) 2017. REFRACTIVE SURPRISE WAS NOTICED. THE LENS REMAINS IMPLANTED IN THE EYE. IT WAS REPORTED THAT THIS EYE HAD A LVC (LASER VISION CORRECTION) 15 YEARS AGO. ADDITIONAL INFORMATION HAS BEEN REQUESTED BUT NONE HAS BEEN FORTHCOMING. IF…	Lens Exchange	Resolved
https://www.accessdata.fda.gov/scripts/cdrh/cfdocs/cfMAUDE/Detail.CFM?MDRFOI__ID=7660091&pc=MTA	2023826-2018-00997	2018-03-21	Injury	STAAR SURGICAL COMPANY	2018-07-03	MTA	IMPLANTABLE COLLAMER LENS	Device Operates Differently Than Expected	Blurred Vision; No Code Available	NA	NA	1	Event Description: THE REPORTER INDICATED THAT THE SURGEON IMPLANTED A 12.6MM VICMO12.6 IMPLANTABLE COLLAMER LENS, -5.0 DIOPTER, INTO THE PATIENT'S LEFT EYE (OS) ON (B)(6) 2018. REPORTEDLY, THE LENS WAS EXCHANGED ON (B)(6) 2018 WITH A SAME SIZE, DIFFERENT DIOPTER LENS DUE TO REFRACTIVE SURPRISE. THE PROBLEM WAS RESOLVED. Manufacturer Narrative: DEVICE EVALUATION: LENS WAS RETURNED DRY, IN LENS CA…	Lens Exchange	Resolved
https://www.accessdata.fda.gov/scripts/cdrh/cfdocs/cfMAUDE/Detail.CFM?MDRFOI__ID=7499550&pc=MTA	2023826-2018-00709	2018-04-05	Injury	STAAR SURGICAL COMPANY	2018-05-09	MTA	IMPLANTABLE COLLAMER LENS (ICL)	Device Operates Differently Than Expected	Blurred Vision; No Code Available	N/A	NA	1	Event Description: THE REPORTER INDICATED THAT THE SURGEON IMPLANTED A 13.7 MM VICM5_13.7, -11.00 DIOPTER, IMPLANTABLE COLLAMER LENS IN THE PATIENT'S RIGHT EYE (OD) ON (B)(6) 2018. ON (B)(6) 2018, REFRACTIVE SURPRISE WAS NOTICED. THE LENS REMAINS IMPLANTED. Manufacturer Narrative: THE LENS WAS EXPLANTED ON (B)(6) 2018 DUE TO REFRACTIVE SURPRISE. THE LENS WAS EXCHANGED FOR A LONGER LENS AND THE PR…	Lens Exchange	Resolved
https://www.accessdata.fda.gov/scripts/cdrh/cfdocs/cfMAUDE/Detail.CFM?MDRFOI__ID=7499555&pc=MTA	2023826-2018-00710	2018-04-05	Injury	STAAR SURGICAL COMPANY	2018-05-09	MTA	IMPLANTABLE COLLAMER LENS (ICL)	Device Operates Differently Than Expected	Blurred Vision; No Code Available	N/A	NA	1	Event Description: THE REPORTER INDICATED THAT THE SURGEON IMPLANTED A 13.7 MM VICM5_13.7, -10.50 DIOPTER, IMPLANTABLE COLLAMER LENS IN THE PATIENT'S LEFT EYE (OS) ON (B)(6) 2018. ON (B)(6) 2018, REFRACTIVE SURPRISE WAS NOTICED. THE LENS REMAINS IMPLANTED. Manufacturer Narrative: THE REPORTER INDICATED THAT THE SURGEON IMPLANTED A 13.7MM VICM5_13.7 IMPLANTABLE COLLAMER LENS OF -10.5 DIOPTER IN TH…	Lens Exchange	Resolved
https://www.accessdata.fda.gov/scripts/cdrh/cfdocs/cfMAUDE/Detail.CFM?MDRFOI__ID=7571599&pc=MTA	2023826-2018-00845	2018-05-03	Injury	STAAR SURGICAL COMPANY	2018-06-05	MTA	IMPLANTABLE COLLAMER LENS	Device Operates Differently Than Expected	Blurred Vision; No Code Available	NA	NA	1	Event Description: THE REPORTER INDICATED THAT THE SURGEON IMPLANTED A 12.6MM VICM5_12.6 IMPLANTABLE COLLAMER LENS, -8.0 DIOPTER, INTO THE PATIENT'S RIGHT EYE (OD) ON (B)(6) 2017. ON (B)(6) 2018 THE LENS WAS EXCHANGED FOR A SAME SIZE, DIFFERENT DIOPTER LENS, THE SURGEON NOTING REFRACTIVE SURPRISE. THE PROBLEM WAS RESOLVED. Manufacturer Narrative: PRODUCT MANUFACTURED BUT NOT SOLD IN THE U.S. DEVI…	Lens Exchange	Resolved
https://www.accessdata.fda.gov/scripts/cdrh/cfdocs/cfMAUDE/Detail.CFM?MDRFOI__ID=6755542&pc=MTA	2023826-2017-01248	2015-05-06	Injury	STAAR SURGICAL COMPANY	2017-07-31	MTA	IMPLANTABLE COLLAMER LENS	Device Operates Differently Than Expected; Adverse Event Without Identified Device or Use Problem	Blurred Vision; No Code Available	N/A	NA	1	Event Description: THE REPORTER INDICATED THAT THE SURGEON IMPLANTED A 13.2MM VICMO13.2 IMPLANTABLE COLLAMER LENS, -9.0 DIOPTER, IN THE PATIENT'S RIGHT EYE (OD) ON (B)(6) 2015. THE LENS WAS EXPLANTED ON (B)(6) 2017 DUE TO REFRACTIVE SURPRISE AND CLOSE TO LOSS OF BEST CORRECTED VISUAL ACUITY (BCVA). THE LENS WAS EXCHANGED FOR A VICM5_13.2, -6.50 DIOPTER, AND THE PROBLEM WAS RESOLVED. ON (B)(6) 201…	Lens Exchange	Resolved
https://www.accessdata.fda.gov/scripts/cdrh/cfdocs/cfMAUDE/Detail.CFM?MDRFOI__ID=6711472&pc=MTA	2023826-2017-01181	2017-06-23	Injury	STAAR SURGICAL COMPANY	2017-07-13	MTA	IMPLANTABLE COLLAMER LENS (ICL)	Device Operates Differently Than Expected; Adverse Event Without Identified Device or Use Problem	Blurred Vision; No Code Available	N/A	NA	1	Event Description: THE REPORTER INDICATED THAT THE SURGEON IMPLANTED A 13.2MM VICMO13.2, DIOPTER -15.00 IMPLANTABLE COLLAMER LENS, INTO THE PATIENT'S LEFT EYE (OS) ON (B)(6) 2017. THE PATIENT EXPERIENCED REFRACTIVE SURPRISE. THE SURGEON ASSUMED THAT THE LENS IS UPSIDE DOWN, AND PLANNED TO EXCHANGE THE LENS FOR THE PATIENT. AS OF THE DATE OF MDR SUBMISSION THE LENS REMAINS IMPLANTED. Manufacturer …	Lens Exchange	Resolved
https://www.accessdata.fda.gov/scripts/cdrh/cfdocs/cfMAUDE/Detail.CFM?MDRFOI__ID=5244802&pc=MTA	2023826-2015-01534	2015-01-01	Injury	STAAR SURGICAL COMPANY	2015-11-23	MTA	ICL (IMPLANTABLE COLLAMER LENS)	Device Operates Differently Than Expected; Appropriate Term/Code Not Available	Blurred Vision; No Code Available	NA	NA	1	Event Description: THE REPORTER INDICATED THE SURGEON IMPLANTED A 12.6MM VICMO12.6, -11.00 DIOPTER IMPLANTABLE COLLAMER LENS IN THE PATIENT'S RIGHT EYE (OD) ON (B)(6) 2014. REFRACTIVE SURPRISE WAS NOTED IN (B)(6) 2015. THE ICL WAS EXPLANTED ON (B)(6) 2015 AND EXCHANGED FOR A SIMILAR LENS MODEL BUT DIFFERENT DIOPTER SIZE. THE RESOLVED THE PROBLEM. , POST-OP, UCVA WAS 20/20 SEE MFR. #2023826-2015-0…	Lens Exchange	Resolved
https://www.accessdata.fda.gov/scripts/cdrh/cfdocs/cfMAUDE/Detail.CFM?MDRFOI__ID=5900669&pc=MTA	2023826-2016-01136	2015-11-10	Injury	STAAR SURGICAL COMPANY	2016-08-24	MTA	ICL (IMPLANTABLE COLLAMER LENS)	Device Operates Differently Than Expected; Appropriate Term/Code Not Available	Blurred Vision; No Code Available	N/A	NA	1	Event Description: THE REPORTER INDICATED THAT THE SURGEON IMPLANTED A 12.6 MM VICMO 12.6 IMPLANTABLE COLLAMER LENS, -3.5 DIOPTER IN TO THE PATIENT'S LEFT EYE (OS) ON (B)(6) 2015. THE LENS WAS EXPLANTED ON (B)(6) 2015 DUE TO REFRACTIVE SURPRISE. THE LENS WAS EXCHANGED FOR A DIFFERENT MODEL AND DIOPTER LENS AND THE PROBLEM WAS RESOLVED. THE PATIENT'S POST-OP UNCORRECTED VISUAL ACUITY WAS 20/30. Ma…	Lens Exchange	Resolved
https://www.accessdata.fda.gov/scripts/cdrh/cfdocs/cfMAUDE/Detail.CFM?MDRFOI__ID=5694868&pc=MTA	2023826-2016-00800	2016-02-17	Injury	STAAR SURGICAL COMPANY	2016-06-02	MTA	ICL (IMPLANTABLE COLLAMER LENS)	Device Operates Differently Than Expected; Appropriate Term/Code Not Available	Blurred Vision; No Code Available	N/A	NA	1	Event Description: THE REPORTER INDICATED THAT THE SURGEON IMPLANTED A 12.6MM VICMO12.6 IMPLANTABLE COLLAMER LENS, -5.0 DIOPTER, IN THE PATIENT'S LEFT EYE (OS) ON (B)(6) 2015. THE LENS WAS EXPLANTED ON (B)(6) 2016 DUE TO A REFRACTIVE SURPRISE. THE LENS WAS EXCHANGED FOR A SAME LENGTH BUT DIFFERENT DIOPTER LENS AND THE PROBLEM WAS RESOLVED. THE PATIENT'S POST-OP BEST-CORRECTED VISUAL ACUITY (BCVA)…	Lens Exchange	Resolved
https://www.accessdata.fda.gov/scripts/cdrh/cfdocs/cfMAUDE/Detail.CFM?MDRFOI__ID=5613052&pc=MTA	2023826-2016-00537	2016-05-17	Injury	STAAR SURGICAL COMPANY	2016-04-27	MTA	ICL (IMPLANTABLE COLLAMER LENS)	Device Operates Differently Than Expected; Appropriate Term/Code Not Available	Blurred Vision; No Code Available	NA	NA	1	Event Description: THE REPORTER INDICATED THE SURGEON IMPLANTED A 13.2MM VICMO13.2 IMPLANTABLE COLLAMER LENS, -14.00 DIOPTER, IN THE PATIENT'S LEFT EYE (OS) ON (B)(6) 2015. THE REPORTER INDICATED THE LENS HAD A REFRACTIVE SURPRISE AND THE PLAN IS TO EXPLANT AND EXCHANGE THE LENS. THE LENS REMAINS IMPLANTED. Manufacturer Narrative: ADDITIONAL INFORMATION: THE REPORTER INDICATED THAT THE SURGEON IM…	Lens Exchange	Resolved
https://www.accessdata.fda.gov/scripts/cdrh/cfdocs/cfMAUDE/Detail.CFM?MDRFOI__ID=6074347&pc=MTA	2023826-2016-00910	2016-07-19	Injury	STAAR SURGICAL COMPANY	2016-11-02	MTA	ICL (IMPLANTABLE COLLAMER LENS)	Device Operates Differently Than Expected; Appropriate Term/Code Not Available	Blurred Vision; No Code Available	NA	NA	1	Event Description: THE REPORTER INDICATED THAT THE SURGEON INSERTED A 13.2MM VICMO13.2 IMPLANTABLE COLLAMER LENS, -10.50 DIOPTER, IN THE PATIENT'S RIGHT EYE ON (B)(6) 2015. THE PATIENT EXPERIENCED REFRACTIVE SURPRISE._x000D_ Manufacturer Narrative: THE REPORTER INDICATED THAT THE SURGEON IMPLANTED A 13.2MM VICMO13.2 IMPLANTABLE COLLAMER LENS, -10.5 DIOPTER, IN THE PATIENT'S RIGHT EYE ON (B)(6) 20…	Lens Exchange	Resolved
https://www.accessdata.fda.gov/scripts/cdrh/cfdocs/cfMAUDE/Detail.CFM?MDRFOI__ID=7639951&pc=MTA	2023826-2018-00967	2018-01-01	Injury	STAAR SURGICAL COMPANY	2018-06-26	MTA	IMPLANTABLE COLLAMER LENS	Device Operates Differently Than Expected; Device Contamination with Chemical or Other Material	Blurred Vision; No Code Available	NA	NA	1	Event Description: THE REPORTER INDICATED THAT THE SURGEON IMPLANTED A 12.6MM VICM5_12.6 IMPLANTABLE COLLAMER LENS, -9.0 DIOPTER INTO THE PATIENT'S LEFT EYE (OS) ON (B)(6) 2016. THE SURGEON REPORTS MILD REFRACTIVE ERROR (MYOPIA, ASTIGMATISM) AND WHITE FOREIGN MATTER ADHERED TO THE SURFACE OF THE LENS, WHICH HAS INCREASED FROM THE FIRST EXAM TO THE FOLLOW-UP EXAM. THE CAUSE OF THE EVENT IS LISTED …	Lens Retention	Unknown
https://www.accessdata.fda.gov/scripts/cdrh/cfdocs/cfMAUDE/Detail.CFM?MDRFOI__ID=7639952&pc=MTA	2023826-2018-00966	2018-01-01	Injury	STAAR SURGICAL COMPANY	2018-06-26	MTA	IMPLANTABLE COLLAMER LENS	Device Operates Differently Than Expected; Device Contamination with Chemical or Other Material	Blurred Vision; No Code Available	NA	NA	1	Event Description: THE REPORTER INDICATED THAT THE SURGEON IMPLANTED A 12.6MM VICM5_12.6 IMPLANTABLE COLLAMER LENS, -9.5 DIOPTER INTO THE PATIENT'S RIGHT EYE (OD) ON (B)(6) 2016. THE SURGEON REPORTS MILD REFRACTIVE ERROR (MYOPIA, ASTIGMATISM) AND WHITE FOREIGN MATTER ADHERED TO THE SURFACE OF THE LENS, WHICH HAS INCREASED FROM THE FIRST EXAM TO THE FOLLOW-UP EXAM. THE CAUSE OF THE EVENT IS LISTED…	Lens Retention	Unknown
https://www.accessdata.fda.gov/scripts/cdrh/cfdocs/cfMAUDE/Detail.CFM?MDRFOI__ID=6213549&pc=MTA	2023826-2016-01833	2015-11-19	Injury	STAAR SURGICAL COMPANY	2016-12-29	MTA	PHAKIC INTRAOCULAR LENS	Device Operates Differently Than Expected; Insufficient Information	Blurred Vision; No Code Available	NA	NA	1	Event Description: THE REPORTER INDICATED THAT THE SURGEON IMPLANTED A 13.2MM VICMO13.2 IMPLANTABLE COLLAMER LENS, -5.0 DIOPTER, INTO THE PATIENT'S LEFT EYE (OS) ON (B)(6) 2015. AFTER IMPLANTATION, THE PATIENT EXPERIENCED REFRACTIVE SURPRISE AND REFRACTIVE CHANGE OVER TIME. AS OF THE DATE OF MDR SUBMISSION, THE LENS REMAINS IMPLANTED IN THE PATIENT. Manufacturer Narrative: CONCLUSION: PER DFU FOR…	Lens Exchange	Resolved
https://www.accessdata.fda.gov/scripts/cdrh/cfdocs/cfMAUDE/Detail.CFM?MDRFOI__ID=6210714&pc=MTA	2023826-2016-01830	2016-09-13	Injury	STAAR SURGICAL COMPANY	2016-12-28	MTA	IMPLANTABLE COLLAMER LENS	Device Operates Differently Than Expected; Insufficient Information	Blurred Vision; No Code Available	NA	NA	1	Event Description: THE REPORTER INDICATED THAT THE SURGEON IMPLANTED A 13.2MM VTICM5_13.2 IMPLANTABLE COLLAMER LENS, -3.50 DIOPTER, INTO THE PATIENT'S RIGHT EYE (OD) ON (B)(6) 2016. AFTER IMPLANTATION, THE PATIENT EXPERIENCED REFRACTIVE SURPRISE. AS OF THE DATE OF MDR SUBMISSION, THE LENS REMAINS IMPLANTED IN THE PATIENT.Event Description: THE LENS WAS EXPLANTED ON (B)(6) 2017. THE LENS WAS EXCHA…	Lens Exchange	Resolved
https://www.accessdata.fda.gov/scripts/cdrh/cfdocs/cfMAUDE/Detail.CFM?MDRFOI__ID=6227597&pc=MTA	2023826-2017-00015	2016-10-06	Injury	STAAR SURGICAL COMPANY	2017-01-05	MTA	IMPLANTABLE COLLAMER LENS	Device Operates Differently Than Expected; Insufficient Information	Blurred Vision; No Code Available	NA	NA	1	Event Description: THE REPORTER INDICATED THAT THE SURGEON IMPLANTED A 13.2MM VICMO13.2 IMPLANTABLE COLLAMER LENS, -12.0 DIOPTER, INTO THE PATIENT'S LEFT EYE (OS) ON (B)(6) 2015. ON (B)(6) 2016 THE LENS WAS EXCHANGED DUE TO THE PATIENT EXPERIENCING REFRACTIVE SURPRISE . AS OF THE DATE OF MDR SUBMISSION, THE LENS HAS NOT BEEN RETURNED FOR PRODUCT EVALUATION. Manufacturer Narrative: THE REPORTER IN…	Lens Exchange	Resolved
https://www.accessdata.fda.gov/scripts/cdrh/cfdocs/cfMAUDE/Detail.CFM?MDRFOI__ID=6179489&pc=MTA	2023826-2016-01765	2016-11-02	Injury	STAAR SURGICAL COMPANY	2016-12-15	MTA	ICL (IMPLANTABLE COLLAMER LENS)	Device Operates Differently Than Expected; Insufficient Information	Blurred Vision; No Code Available	NA	NA	1	Event Description: THE REPORTER INDICATED THAT THE SURGEON IMPLANTED A 12.6MM VTICMO12.6 IMPLANTABLE COLLAMER LENS, -9.50 DIOPTER, IN THE PATIENT'S RIGHT EYE (OD) ON (B)(6) 2016. ON (B)(6) 2016 THE PATIENT EXPERIENCED REFRACTIVE SURPRISE. AT THE TIME OF REPORTING IT IS UNKNOWN IF THE LENS WILL BE EXCHANGED. Manufacturer Narrative: LENS DIOPTER DESCRIPTION IS -9.50/+2.0/90 (SPHERE/CYLINDER/AXIS). …	Unknown	Unknown
https://www.accessdata.fda.gov/scripts/cdrh/cfdocs/cfMAUDE/Detail.CFM?MDRFOI__ID=6978337&pc=MTA	2023826-2017-01630	2017-01-19	Injury	STAAR SURGICAL COMPANY	2017-10-25	MTA	IMPLANTABLE COLLAMER LENS (ICL)	Device Operates Differently Than Expected; Insufficient Information	Blurred Vision; No Code Available	NA	NA	1	Event Description: THE REPORTER INDICATED THE SURGEON IMPLANTED A 13.7MM VICMO13.7 IMPLANTABLE COLLAMER LENS, -11.00 DIOPTER, IN THE PATIENT'S RIGHT EYE (OD), ON (B)(6) 2017. THE LENS WAS EXPLANTED ON (B)(6) 2017 DUE TO REFRACTIVE SURPRISE/REFRACTIVE CHANGE OVERTIME. THE POSTOPERATIVE REFRACTION WAS NOT PREDICTED (HYPEROPIA-MANIFEST REFRACTION, CYCLOPLEGIC REFRACTION). THE LENS WAS NOT EXCHANGED …	Lens Extraction	Unknown
https://www.accessdata.fda.gov/scripts/cdrh/cfdocs/cfMAUDE/Detail.CFM?MDRFOI__ID=7438806&pc=MTA	2023826-2018-00564	2010-11-24	Injury	STAAR SURGICAL COMPANY	2018-04-17	MTA	IMPLANTABLE COLLAMER LENS (ICL)	Inadequacy of Device Shape and/or Size	Blurred Vision; No Code Available	N/A	NA	1	Event Description: THE REPORTER INDICATED THE SURGEON IMPLANTED A 12.5MM ICM125V4 IMPLANTABLE COLLAMER LENS, DIOPTER -10.5 INTO THE PATIENT'S LEFT EYE (OS) ON (B)(6) 2010. THE SURGEON REPORTS LOW VAULT AND REFRACTIVE CHANGE OVER TIME. CURRENTLY, THE LENS REMAINS IMPLANTED. Manufacturer Narrative: PREVIOUSLY STATED THAT THE LENS REMAINS IMPLANTED. CORRECTED-ON (B)(6) 2018 THE LENS WAS EXCHANGED FO…	Lens Exchange	Resolved
https://www.accessdata.fda.gov/scripts/cdrh/cfdocs/cfMAUDE/Detail.CFM?MDRFOI__ID=7438807&pc=MTA	2023826-2018-00566	2010-11-24	Injury	STAAR SURGICAL COMPANY	2018-04-17	MTA	IMPLANTABLE COLLAMER LENS (ICL)	Inadequacy of Device Shape and/or Size	Blurred Vision; No Code Available	N/A	NA	1	Event Description: THE REPORTER INDICATED THE SURGEON IMPLANTED A 12.5MM ICM125V4 IMPLANTABLE COLLAMER LENS, DIOPTER -8.0 INTO THE PATIENT'S RIGHT EYE (OD) ON (B)(6) 2010. THE SURGEON REPORTS LOW VAULT AND REFRACTIVE CHANGE OVER TIME. CURRENTLY, THE LENS REMAINS IMPLANTED. Manufacturer Narrative: PREVIOUSLY STATED THE LENS REMAINS IMPLANTED. CORRECTED INFORMATION-ON 10-JUL-2018 THE LENS WAS EXCHA…	Lens Exchange	Resolved
https://www.accessdata.fda.gov/scripts/cdrh/cfdocs/cfMAUDE/Detail.CFM?MDRFOI__ID=7599401&pc=MTA	2023826-2018-00908	2016-04-05	Injury	STAAR SURGICAL COMPANY	2018-06-13	MTA	IMPLANTABLE COLLAMER LENS (ICL)	Inadequacy of Device Shape and/or Size	Blurred Vision; No Code Available	NA	NA	1	Event Description: THE REPORTER INDICATED THAT THE SURGEON IMPLANTED A 12.1MM VICMO12.1, -5.0 DIOPTER, IMPLANTABLE COLLAMER LENS INTO THE PATIENT'S RIGHT EYE (OD) ON (B)(6) 2016. LOW VAULT,REFRACTIVE SURPRISE, AND REFRACTIVE CHANGE OVERTIME WAS OBSERVED. AS OF THE DATE OF MDR REPORTING THE LENS REMAINS IMPLANTED AND THE SURGEON REPORTED THAT HE PLANS TO EXCHANGE THE LENS. IF ADDITIONAL INFORMATIO…	Lens Exchange	Resolved
https://www.accessdata.fda.gov/scripts/cdrh/cfdocs/cfMAUDE/Detail.CFM?MDRFOI__ID=7601418&pc=MTA	2023826-2018-00907	2016-04-05	Injury	STAAR SURGICAL COMPANY	2018-06-14	MTA	IMPLANTABLE COLLAMER LENS (ICL)	Inadequacy of Device Shape and/or Size	Blurred Vision; No Code Available	NA	NA	1	Event Description: THE REPORTER INDICATED THAT THE SURGEON IMPLANTED A 12.1MM VICMO12.1, -5.0 DIOPTER, IMPLANTABLE COLLAMER LENS INTO THE PATIENT'S LEFT EYE (OS) ON (B)(6) 2016. LOW VAULT,REFRACTIVE SURPRISE, AND REFRACTIVE CHANGE OVERTIME WAS OBSERVED. AS OF THE DATE OF MDR REPORTING THE LENS REMAINS IMPLANTED AND THE SURGEON REPORTED THAT HE PLANS TO EXCHANGE THE LENS. IF ADDITIONAL INFORMATION…	Lens Exchange	Resolved
https://www.accessdata.fda.gov/scripts/cdrh/cfdocs/cfMAUDE/Detail.CFM?MDRFOI__ID=6199353&pc=MTA	2023826-2016-01798	2016-10-05	Injury	STAAR SURGICAL COMPANY	2016-12-22	MTA	IMPLANTABLE COLLAMER LENS (ICL)	Inadequacy of Device Shape and/or Size	Blurred Vision; No Code Available	NA	NA	1	Event Description: THE REPORTER INDICATED THAT THE SURGEON IMPLANTED A 13.2 MM VICMO13.2 IMPLANTABLE COLLAMER LENS, -8.00 DIOPTER, IN THE PATIENT'S LEFT EYE (OS) ON (B)(6) 2016. THE PATIENT REPORTED A LOW VAULT AND REFRACTIVE SURPRISE. AS OF THE DATE OF MDR SUBMISSION, THE LENS REMAINS IMPLANTED. Manufacturer Narrative: ADDITIONAL DATA: ON (B)(6) 2016, THE LENS WAS EXCHANGED WITH LONGER LENS AND …	Lens Exchange	Resolved
https://www.accessdata.fda.gov/scripts/cdrh/cfdocs/cfMAUDE/Detail.CFM?MDRFOI__ID=6373632&pc=MTA	2023826-2017-00315	2017-01-25	Injury	STAAR SURGICAL COMPANY	2017-03-02	MTA	ICL (IMPLANTABLE COLLAMER LENS)	Inadequacy of Device Shape and/or Size	Blurred Vision; No Code Available	N/A	NA	1	Event Description: THE REPORTER INDICATED THAT THE SURGEON IMPLANTED A 12.6MM VICM5_12.6 IMPLANTABLE COLLAMER LENS, -10 DIOPTER, IN THE PATIENT'S LEFT EYE (OS) ON (B)(6) 2017. THE LENS WAS EXPLANTED DUE TO LOW VAULTING AND REFRACTIVE SURPRISE. THE LENS WAS EXCHANGED FOR A SHORTER LENS AND THE PROBLEM WAS RESOLVED. Manufacturer Narrative: (CORRECTED DATA): LENS WAS EXCHANGED FOR A LONGER LENS ON (…	Lens Exchange	Resolved
https://www.accessdata.fda.gov/scripts/cdrh/cfdocs/cfMAUDE/Detail.CFM?MDRFOI__ID=6388872&pc=MTA	2023826-2017-00330	2017-02-01	Injury	STAAR SURGICAL COMPANY	2017-03-08	MTA	ICL (IMPLANTABLE COLLAMER LENS)	Inadequacy of Device Shape and/or Size	Blurred Vision; No Code Available	N/A	NA	1	Event Description: THE REPORTER INDICATED THAT THE SURGEON IMPLANTED A 13.2 MM VICMO13.2 IMPLANTABLE COLLAMER LENS, -17.00 DIOPTER, IN THE PATIENT'S LEFT EYE (OS) ON (B)(6) 2016. ON (B)(6) 2017 THE LENS WAS EXCHANGED FOR A SHORTER LENS DUE TO EXCESSIVE VAULTING. THE PATIENT ALSO EXPERIENCED REFRACTIVE SURPRISE, AND SIGNIFICANT REDUCTION OF IRIDO-CORNEAL ANGLES. THE PROBLEM WAS RESOLVED. AS OF THE…	Lens Exchange	Resolved
https://www.accessdata.fda.gov/scripts/cdrh/cfdocs/cfMAUDE/Detail.CFM?MDRFOI__ID=6812399&pc=MTA	2023826-2017-01361	2017-04-05	Injury	STAAR SURGICAL COMPANY	2017-08-22	MTA	IMPLANTABLE COLLAMER LENS (ICL)	Inadequacy of Device Shape and/or Size	Blurred Vision; No Code Available	N/A	NA	1	Event Description: THE REPORTER INDICATED THAT THE SURGEON IMPLANTED A 12.6MM VICM5_12.6 IMPLANTABLE COLLAMER LENS, -13.5 DIOPTER, INTO THE PATIENT'S LEFT EYE (OS) ON (B)(6) 2017. ON (B)(6) 2017 THE LENS WAS EXCHANGED FOR A SHORTER LENS DUE TO EXCESSIVE VAULT, REFRACTIVE SURPRISE, AND LOSS OF BCVA. THE PROBLEM WAS RESOLVED. Manufacturer Narrative: LENS WAS RETURNED DRY IN A MICROCENTRIFUGE VIAL. …	Lens Exchange	Resolved
https://www.accessdata.fda.gov/scripts/cdrh/cfdocs/cfMAUDE/Detail.CFM?MDRFOI__ID=6565214&pc=MTA	2023826-2017-00790	2017-04-12	Injury	STAAR SURGICAL COMPANY	2017-05-12	MTA	IMPLANTABLE COLLAMER LENS (ICL)	Inadequacy of Device Shape and/or Size	Blurred Vision; No Code Available	P030016	NA	1	Event Description: THE REPORTER INDICATED THE SURGEON IMPLANTED A 13.2MM MICL13.2 IMPLANTABLE COLLAMER LENS, -9.5 DIOPTER, IN THE PATIENT'S LEFT EYE (OS), ON (B)(6) 2017. THE LENS WAS EXPLANTED ON (B)(6) 2017 DUE TO EXCESSIVE VAULTING, NARROWING OF THE ANGLE AND SHALLOWING OF THE ANTERIOR CHAMBER. THE PATIENT EXPERIENCED BLURRY NEAR VISION. THE LENS WAS EXCHANGED FOR A SHORTER LENS AND THE PROBLE…	Lens Exchange	Resolved
https://www.accessdata.fda.gov/scripts/cdrh/cfdocs/cfMAUDE/Detail.CFM?MDRFOI__ID=6801617&pc=MTA	2023826-2017-01279	2017-06-11	Injury	STAAR SURGICAL COMPANY	2017-08-17	MTA	IMPLANTABLE COLLAMER LENS (ICL)	Inadequacy of Device Shape and/or Size	Blurred Vision; No Code Available	N/A	NA	1	Event Description: THE REPORTER INDICATED THAT THE SURGEON IMPLANTED A 12.6MM VICM5_12.6 IMPLANTABLE COLLAMER LENS, -6.5 DIOPTER, IN THE PATIENT'S LEFT EYE (OS) ON (B)(6) 2017. THE LENS WAS EXPLANTED ON (B)(6) 2017 DUE TO EXCESSIVE VAULTING. THE LENS WAS EXCHANGED FOR A SHORTER LENS AND THE PROBLEM WAS RESOLVED. Manufacturer Narrative: PRODUCT EVALUATION FOUND THE LENS RETURNED DRY IN A MICRO CEN…	Lens Exchange	Resolved
https://www.accessdata.fda.gov/scripts/cdrh/cfdocs/cfMAUDE/Detail.CFM?MDRFOI__ID=6908164&pc=MTA	2023826-2017-01489	2017-07-03	Injury	STAAR SURGICAL COMPANY	2017-10-02	MTA	IMPLANTABLE COLLAMER LENS (ICL)	Inadequacy of Device Shape and/or Size	Blurred Vision; No Code Available	N/A	NA	1	Event Description: THE REPORTER INDICATED THAT THE SURGEON IMPLANTED A 13.2 MM VICMO13.2, -14.50 DIOPTER, IMPLANTABLE COLLAMER LENS IN THE PATIENT'S RIGHT EYE (OD) ON (B)(6) 2017. ON (B)(6) 2017, THE LENS WAS EXPLANTED DUE TO EXCESSIVE VAULTING AND REFRACTIVE SURPRISE. THE LENS WAS EXCHANGED FOR A SHORTER LENS AND THE PROBLEM WAS RESOLVED. Manufacturer Narrative: THE LENS WAS RETURNED DRY, IN A L…	Lens Exchange	Resolved
https://www.accessdata.fda.gov/scripts/cdrh/cfdocs/cfMAUDE/Detail.CFM?MDRFOI__ID=6890299&pc=MTA	2023826-2017-01470	2017-07-13	Injury	STAAR SURGICAL COMPANY	2017-09-25	MTA	IMPLANTABLE COLLAMER LENS (ICL)	Inadequacy of Device Shape and/or Size	Blurred Vision; No Code Available	N/A	NA	1	Event Description: THE REPORTER INDICATED THAT THE SURGEON IMPLANTED A 13.2 MM VICMO13.2, -3.75 DIOPTER, IMPLANTABLE COLLAMER LENS IN THE PATIENT'S RIGHT EYE (OD) ON (B)(6) 2017. THE LENS WAS EXPLANTED ON (B)(6) 2017 DUE TO EXCESSIVE VAULTING AND SIGNIFICANT REDUCTION OF IRIDO-CORNEAL ANGLES. THE LENS WAS EXCHANGED FOR A SHORTER LENS AND THE PROBLEM WAS RESOLVED. Manufacturer Narrative: THE LENS …	Lens Exchange	Resolved
https://www.accessdata.fda.gov/scripts/cdrh/cfdocs/cfMAUDE/Detail.CFM?MDRFOI__ID=7050172&pc=MTA	2023826-2017-01749	2017-10-23	Injury	STAAR SURGICAL COMPANY	2017-11-21	MTA	IMPLANTABLE COLLAMER LENS (ICL)	Inadequacy of Device Shape and/or Size	Blurred Vision; No Code Available	NA	NA	1	Event Description: THE REPORTER INDICATED THE SURGEON IMPLANTED A 12.6MM VICM5_12.6 IMPLANTABLE COLLAMER LENS, -09.00 DIOPTER, IN THE PATIENT'S LEFT EYE (OS) ON (B)(6) 2017. THE REPORTER INDICATED THE LENS HAD A LOW VAULT AND THERE WAS A REFRACTIVE SURPRISE. THE DOCTOR PLANS TO EXPLANT THE LENS BUT TO DATE THE LENS REMAINS IMPLANTED. ADDITIONAL INFORMATION HAS BEEN REQUESTED BUT NONE HAS BEEN FOR…	Lens Exchange	Resolved
https://www.accessdata.fda.gov/scripts/cdrh/cfdocs/cfMAUDE/Detail.CFM?MDRFOI__ID=7152456&pc=MTA	2023826-2017-01961	2017-11-06	Injury	STAAR SURGICAL COMPANY	2017-12-28	MTA	IMPLANTABLE COLLAMER LENS (ICL)	Inadequacy of Device Shape and/or Size	Blurred Vision; No Code Available	NA	NA	1	Event Description: THE REPORTER INDICATED THAT THE SURGEON IMPLANTED A 13.2MM VICMO13.2 IMPLANTABLE COLLAMER LENS, -4.0 DIOPTER, INTO THE PATIENT'S LEFT EYE (OS) ON (B)(6) 2017. ON (B)(6) 2017 THE LENS WAS EXCHANGED WITH A SMALLER LENS DUE TO EXCESSIVE VAULTING. THE SURGEON ALSO NOTED THE FOLLOWING: LOSS OF BCVA, SIGNIFICANT REDUCTION OF IRIDO-CORNEAL ANGLES (ICA), AND BLURRED VISION. THE PROBLEM…	Lens Exchange	Resolved
https://www.accessdata.fda.gov/scripts/cdrh/cfdocs/cfMAUDE/Detail.CFM?MDRFOI__ID=7152530&pc=MTA	2023826-2017-01960	2017-11-06	Injury	STAAR SURGICAL COMPANY	2017-12-28	MTA	IMPLANTABLE COLLAMER LENS (ICL)	Inadequacy of Device Shape and/or Size	Blurred Vision; No Code Available	NA	NA	1	Event Description: THE REPORTER INDICATED THAT THE SURGEON IMPLANTED A 13.2MM VICMO13.2 IMPLANTABLE COLLAMER LENS, -8.0 DIOPTER, INTO THE PATIENT'S RIGHT EYE (OD) ON (B)(6) 2017. ON (B)(6) 2017 THE LENS WAS EXCHANGED WITH A SMALLER LENS DUE TO EXCESSIVE VAULTING. THE SURGEON ALSO NOTED THE FOLLOWING: LOSS OF BCVA, SIGNIFICANT REDUCTION OF IRIDO-CORNEAL ANGLES (ICA), AND BLURRED VISION. THE PROBLE…	Lens Exchange	Resolved
https://www.accessdata.fda.gov/scripts/cdrh/cfdocs/cfMAUDE/Detail.CFM?MDRFOI__ID=7213972&pc=MTA	2023826-2018-00139	2017-12-05	Injury	STAAR SURGICAL COMPANY	2018-01-23	MTA	IMPLANTABLE COLLAMER LENS (ICL)	Inadequacy of Device Shape and/or Size	Blurred Vision; No Code Available	P030016	NA	1	Event Description: THE REPORTER INDICATED THAT THE SURGEON IMPLANTED A 13.2MM MICL13.2 LENS, DIOPTER -13.0 INTO THE PATIENT'S RIGHT (OD) EYE ON (B)(6) 2017. ON (B)(6) 2018 THE LENS WAS EXCHANGED FOR A SMALLER LENS DUE TO BLURRED VISION AND EXCESSIVE VAULT. THE PROBLEM WAS RESOLVED. Manufacturer Narrative: DEVICE EVALUATION: THE LENS WAS RETURNED DRY, IN A LENS CASE/VIAL, AND IN AN ENVELOPE. VISUA…	Lens Exchange	Resolved
https://www.accessdata.fda.gov/scripts/cdrh/cfdocs/cfMAUDE/Detail.CFM?MDRFOI__ID=7308043&pc=MTA	2023826-2018-00308	2018-01-15	Injury	STAAR SURGICAL COMPANY	2018-03-01	MTA	IMPLANTABLE COLLAMER LENS (ICL)	Inadequacy of Device Shape and/or Size	Blurred Vision; No Code Available	P030016	NA	1	Event Description: THE REPORTER INDICATED THE SURGEON IMPLANTED A 13.2MM MICL13.2 IMPLANTABLE COLLAMER LENS, -12.5 DIOPTER, IN THE PATIENT'S EYE ON (B)(6) 2018. THE LENS WAS EXPLANTED ON (B)(6) 2018 DUE TO EXCESSIVE VAULTING AND WAS EXCHANGED FOR A SHORTER LENS. THE LENS WAS DISCARDED. ADDITIONAL INFORMATION HAS BEEN REQUESTED BUT NONE HAS BEEN FORTHCOMING. IF ADDITIONAL INFORMATION IS RECEIVED, …	Lens Exchange	Resolved
https://www.accessdata.fda.gov/scripts/cdrh/cfdocs/cfMAUDE/Detail.CFM?MDRFOI__ID=7597242&pc=MTA	2023826-2018-00900	2018-05-15	Injury	STAAR SURGICAL COMPANY	2018-06-13	MTA	IMPLANTABLE COLLAMER LENS (ICL)	Inadequacy of Device Shape and/or Size	Blurred Vision; No Code Available	P030016	NA	1	Event Description: THE REPORTER INDICATED THAT THE SURGEON IMPLANTED A 13.7MM, MICL13.7, -10.0 DIOPTER, IMPLANTABLE COLLAMER LENS INTO THE PATIENT'S LEFT EYE (OS) ON (B)(6) 2018. ON (B)(6) 2018 THE LENS WAS REMOVED AND EXCHANGED FOR A SHORTER LENGTH AND DIFFERENT DIOPTER LENS DUE TO OBSERVATION OF EXCESSIVE VAULT AND REFRACTIVE SURPRISE. THIS EXCHANGE RESOLVED THE PROBLEM. PROGRESSIVE MYOPIA WAS …	Lens Exchange	Resolved
https://www.accessdata.fda.gov/scripts/cdrh/cfdocs/cfMAUDE/Detail.CFM?MDRFOI__ID=7597627&pc=MTA	2023826-2018-00899	2018-05-15	Injury	STAAR SURGICAL COMPANY	2018-06-13	MTA	IMPLANTABLE COLLAMER LENS (ICL)	Inadequacy of Device Shape and/or Size	Blurred Vision; No Code Available	P030016	NA	1	Event Description: THE REPORTER INDICATED THAT THE SURGEON IMPLANTED A 13.7MM, MICL13.7, -11.0 DIOPTER, IMPLANTABLE COLLAMER LENS INTO THE PATIENTS RIGHT EYE (OD) ON (B)(6) 2018. ON (B)(6) 2018 THE LENS WAS REMOVED AND EXCHANGED FOR A SHORTER LENGTH AND DIFFERENT DIOPTER LENS DUE TO OBSERVATION OF EXCESSIVE VAULT AND REFRACTIVE SURPRISE. THIS EXCHANGE RESOLVED THE PROBLEM. PROGRESSIVE MYOPIA WAS …	Lens Exchange	Resolved
https://www.accessdata.fda.gov/scripts/cdrh/cfdocs/cfMAUDE/Detail.CFM?MDRFOI__ID=8002182&pc=MTA	2023826-2018-01540	2018-10-04	Injury	STAAR SURGICAL COMPANY	2018-10-24	MTA	IMPLANTABLE COLLAMER LENS (ICL)	Inadequacy of Device Shape and/or Size	Blurred Vision; No Code Available	P030016	NA	1	Event Description: THE REPORTER INDICATED THAT THE SURGEON IMPLANTED A 13.2MM MICL13.2, -11.0 DIOPTER, IMPLANTABLE COLLAMER LENS INTO THE PATIENTS LEFT EYE (OS) ON (B)(6) 2018. ON (B)(6) 2018 THE LENS WAS REMOVED FOR A SHORTER LENGTH LENS DUE TO EXCESSIVE VAULT AND BLURRED VISION. THIS EXCHANGE RESOLVED THE PROBLEM. Manufacturer Narrative: LENS WAS RETURNED IN LIQUID, IN A CONTACT LENS CASE. VISU…	Lens Exchange	Resolved
https://www.accessdata.fda.gov/scripts/cdrh/cfdocs/cfMAUDE/Detail.CFM?MDRFOI__ID=9988487&pc=MTA	2023826-2020-00984	2020-03-20	Injury	STAAR SURGICAL COMPANY	2020-04-22	MTA	IMPLANTABLE COLLAMER LENS (ICL)	Inadequacy of Device Shape and/or Size	Blurred Vision; No Code Available	N/A	NA	1	Event Description: THE REPORTER INDICATED THAT A VICMO13.2, -4.00 DIOPTER, IMPLANTABLE COLLAMER LENS WAS IMPLANTED INTO THE PATIENTS RIGHT EYE (OD) ON 20 MAR 2013. LOW VAULT AND REFRACTIVE CHANGE OVERTIME WAS OBSERVED. CAUSE OF EVENT IS UNKNOWN. IF ADDITIONAL INFORMATION IS RECEIVED A SUPPLEMENTAL MEDWATCH REPORT WILL BE SUBMITTED. Manufacturer Narrative: ADDITIONAL INFORMATION: B1-ADVERSE EVENT.…	Lens Exchange	Resolved
https://www.accessdata.fda.gov/scripts/cdrh/cfdocs/cfMAUDE/Detail.CFM?MDRFOI__ID=6094948&pc=MTA	2023826-2016-01635	NA	Injury	STAAR SURGICAL COMPANY	2016-11-10	MTA	ICL (IMPLANTABLE COLLAMER LENS)	Inadequacy of Device Shape and/or Size	Blurred Vision; No Code Available	P030016	NA	1	Event Description: THE REPORTER STATED THE SURGEON EXPLANTED A 13.7MM MICL13.7 IMPLANTABLE COLLAMER LENS, -10.5 DIOPTER, FROM THE PATIENT'S RIGHT EYE (OD) ON (B)(6) 2016 DUE TO EXCESSIVE VAULTING, INTERMITTENT ANGLE CLOSURE, BLURRY VISION AND DILATED EYE. THE LENS WAS EXCHANGED FOR A SHORTER LENS AND THE PATIENT IS DOING WELL. THE REPORTER STATED THE LENS WAS IMPLANTED BY ANOTHER SURGEON IN (B)(6…	Lens Exchange	Resolved
https://www.accessdata.fda.gov/scripts/cdrh/cfdocs/cfMAUDE/Detail.CFM?MDRFOI__ID=6244089&pc=MTA	2023826-2017-00054	NA	Injury	STAAR SURGICAL COMPANY	2017-01-11	MTA	ICL (IMPLANTABLE COLLAMER LENS)	Inadequacy of Device Shape and/or Size	Blurred Vision; No Code Available	P030016	NA	1	Event Description: THE REPORTER STATED THE SURGEON IMPLANTED A 12.1MM MICL12.1 IMPLANTABLE COLLAMER LENS, -7.0 DIOPTER, IN THE PATIENT'S RIGHT EYE (OD) ON (B)(6) 2016. THE LENS WAS EXPLANTED ON (B)(6) 2016 DUE TO MYOPIC REFRACTION. THE LENS WAS EXCHANGED FOR ANOTHER SAME MODEL (12.1MM) BUT DIFFERENT DIOPTER POWER (-8.0). Manufacturer Narrative: DEVICE EVALUATION: THE LENS WAS RETURNED IN A LENS V…	Lens Exchange	Unknown
https://www.accessdata.fda.gov/scripts/cdrh/cfdocs/cfMAUDE/Detail.CFM?MDRFOI__ID=6244134&pc=MTA	2023826-2017-00055	NA	Injury	STAAR SURGICAL COMPANY	2017-01-11	MTA	ICL (IMPLANTABLE COLLAMER LENS)	Inadequacy of Device Shape and/or Size	Blurred Vision; No Code Available	P030016	NA	1	Event Description: THE REPORTER STATED THE SURGEON IMPLANTED A 12.1MM MICL12.1 IMPLANTABLE COLLAMER LENS, -6.0 DIOPTER, IN THE PATIENT'S LEFT EYE (OS) ON (B)(6) 2016. THE LENS WAS EXPLANTED ON (B)(6) 2016 DUE TO MYOPIC REFRACTION. THE LENS WAS EXCHANGED FOR ANOTHER SAME MODEL (12.1MM) BUT DIFFERENT DIOPTER POWER (-7.5). Manufacturer Narrative: DEVICE EVALUATION: THE LENS WAS RETURNED IN A LENS VI…	Lens Exchange	Unknown
https://www.accessdata.fda.gov/scripts/cdrh/cfdocs/cfMAUDE/Detail.CFM?MDRFOI__ID=6993874&pc=MTA	2023826-2017-01660	NA	Injury	STAAR SURGICAL COMPANY	2017-11-01	MTA	IMPLANTABLE COLLAMER LENS (ICL)	Inadequacy of Device Shape and/or Size	Blurred Vision; No Code Available	NA	NA	1	Event Description: THE REPORTER INDICATED THAT THE SURGEON IMPLANTED A 13.7MM VICMO13.7 IMPLANTABLE COLLAMER LENS, -14.0 DIOPTER, INTO THE PATIENT'S RIGHT EYE (OD) IN (B)(6) 2017. ON (B)(6) 2017 THE LENS WAS EXCHANGED WITH A SHORTER LENS DUE TO EXCESSIVE VAULT AND REFRACTIVE SURPRISE. THE PROBLEM WAS RESOLVED. Manufacturer Narrative: A LENS WORK ORDER SEARCH WAS PERFORMED. NO SIMILAR COMPLAINT TY…	Lens Exchange	Resolved
https://www.accessdata.fda.gov/scripts/cdrh/cfdocs/cfMAUDE/Detail.CFM?MDRFOI__ID=4542595&pc=MTA	2023826-2015-00175	2014-12-01	Injury	STAAR SURGICAL COMPANY	2015-02-24	MTA	ICL (IMPLANTABLE COLLAMER LENS)	Inadequacy of Device Shape and/or Size; Appropriate Term/Code Not Available	Blurred Vision; No Code Available	P030016	NA	1	Event Description: THE REPORTER INDICATED THE SURGEON IMPLANTED A 13.0MM ICM130V4 IMPLANTABLE COLLAMER LENS IN THE PATIENT'S LEFT EYE (OS) ON (B)(6) 2014. THE LENS WAS EXPLANTED ON (B)(6) 2014 DUE TO EXCESSIVE VAULTING. THE PATIENT EXPERIENCED REFRACTIVE CHANGE OVERTIME (OVERCORRECTION) AND BLURRED VISION. THE ICL WAS EXCHANGED FOR ANOTHER SAME MODEL LENS BUT A DIFFERENT DIOPTER POWER (-15.0), WH…	Lens Exchange	Resolved
https://www.accessdata.fda.gov/scripts/cdrh/cfdocs/cfMAUDE/Detail.CFM?MDRFOI__ID=5161953&pc=MTA	2023826-2015-01270	2015-04-06	Injury	STAAR SURGICAL COMPANY AG	2015-10-20	MTA	ICL (IMPLANTABLE COLLAMER LENS)	Inadequacy of Device Shape and/or Size; Appropriate Term/Code Not Available	Blurred Vision; No Code Available	P030016	NA	1	Event Description: THE REPORTER INDICATED THE SURGEON IMPLANTED A 12.0MM ICM120V4 IMPLANTABLE COLLAMER LENS, -12.0 DIOPTER IN THE PATIENT'S LEFT EYE (OS) ON (B)(6) 2013. LENS ROTATION WITH LOW VAULT WAS OBSERVED ON (B)(6) 2015. PATIENT HAD BLURRED VISION. THE LENS WAS EXPLANTED ON (B)(6) 2015 AND WAS EXCHANGED FOR A LONGER LENS WITH A SIMILAR DIOPTER. THE PROBLEM WAS RESOLVED. PATIENT VISIT ON (B…	Lens Exchange	Resolved
https://www.accessdata.fda.gov/scripts/cdrh/cfdocs/cfMAUDE/Detail.CFM?MDRFOI__ID=5370894&pc=MTA	2023826-2016-00057	2015-12-08	Injury	STAAR SURGICAL COMPANY	2016-01-15	MTA	ICL (IMPLANTABLE COLLAMER LENS)	Inadequacy of Device Shape and/or Size; Appropriate Term/Code Not Available	Blurred Vision; No Code Available	P030016	NA	1	Event Description: THE REPORTER INDICATED THE SURGEON IMPLANTED A 13.2MM MICL13.2 IMPLANTABLE COLLAMER LENS, -11.5 DIOPTER, IN THE PATIENT'S RIGHT EYE (OD) ON (B)(6) 2015. THE LENS WAS EXPLANTED ON (B)(6) 2015 DUE TO MECHANICAL COMPLICATION OF ICL INITIAL ENCOUNTER. ADDITIONAL INFORMATION HAS BEEN REQUESTED BUT NONE HAS BEEN FORTHCOMING. IF ADDITIONAL INFORMATION IS RECEIVED, A SUPPLEMENTAL MEDWA…	Lens Exchange	Resolved
https://www.accessdata.fda.gov/scripts/cdrh/cfdocs/cfMAUDE/Detail.CFM?MDRFOI__ID=5923619&pc=MTA	2023826-2016-01221	2016-05-25	Injury	STAAR SURGICAL COMPANY AG	2016-09-01	MTA	ICL (IMPLANTABLE COLLAMER LENS)	Inadequacy of Device Shape and/or Size; Appropriate Term/Code Not Available	Blurred Vision; No Code Available	P030016	NA	1	Event Description: THE REPORTER INDICATED THAT THE SURGEON IMPLANTED A 12.5MM ICM125V4 IMPLANTABLE COLLAMER LENS, -8.0 DIOPTER, IN THE PATIENT'S RIGHT EYE (OD) IN (B)(6) 1999. THE LENS WAS EXPLANTED ON (B)(6) 2016 DUE TO LOW VAULTING. THE LENS WAS EXCHANGED FOR A LONGER LENS (13.2MM) AND THE PROBLEM WAS NOT RESOLVED. THE VAULT IS LOW AND THE PLAN IS TO EXCHANGE FOR A 13.7MM. Manufacturer Narrativ…	Lens Exchange	Not_Resolved
https://www.accessdata.fda.gov/scripts/cdrh/cfdocs/cfMAUDE/Detail.CFM?MDRFOI__ID=5826240&pc=MTA	2023826-2016-00255	2015-11-18	Injury	STAAR SURGICAL COMPANY	2016-07-27	MTA	ICL (IMPLANTABLE COLLAMER LENS)	Inadequacy of Device Shape and/or Size; Device Dislodged or Dislocated; Unintended Movement; Appropriate Term/Code Not Available	Blurred Vision; No Code Available	NA	NA	1	Event Description: THE REPORTER INDICATED THE SURGEON IMPLANTED A 13.2MM VICMO13.2 IMPLANTABLE COLLAMER LENS, -05.00 DIOPTER, IN THE PATIENT'S RIGHT EYE (OD) ON (B)(6) 2015. THE LENS WAS EXPLANTED ON (B)(6) 2015 DUE TO EXCESSIVE VAULTING, LENS DISLOCATION/SUBLUXATION AND REFRACTIVE CHANGE OVERTIME. THE LENS WAS EXCHANGED FOR A SHORTER LENS AND THE PROBLEM WAS RESOLVED. THE PATIENT'S POST-OP BEST-…	Lens Exchange	Resolved
https://www.accessdata.fda.gov/scripts/cdrh/cfdocs/cfMAUDE/Detail.CFM?MDRFOI__ID=7594279&pc=MTA	2023826-2018-00891	2013-03-20	Injury	STAAR SURGICAL COMPANY	2018-06-12	MTA	IMPLANTABLE COLLAMER LENS (ICL)	Inadequacy of Device Shape and/or Size; Device Operates Differently Than Expected	Blurred Vision; No Code Available	N/A	NA	1	Event Description: THE REPORTER INDICATED THE SURGEON IMPLANTED A 13.2MM VICMO13.2 IMPLANTABLE COLLAMER LENS, DIOPTER -2.5 INTO THE PATIENT'S LEFT EYE (OS) ON (B)(6) 2013. THE SURGEON REPORTS LOW VAULT, REFRACTIVE CHANGE OVER TIME AND REFRACTIVE SURPRISE. REPORTEDLY, THE LENS REMAINS IMPLANTED. Manufacturer Narrative: ON (B)(6) 2018 THE LENS WAS EXCHANGED FOR A LONGER LENS DUE TO LOW VAULTING, RE…	Lens Exchange	Resolved
https://www.accessdata.fda.gov/scripts/cdrh/cfdocs/cfMAUDE/Detail.CFM?MDRFOI__ID=6172583&pc=MTA	2023826-2016-01747	2016-11-02	Injury	STAAR SURGICAL COMPANY	2016-12-13	MTA	ICL (IMPLANTABLE COLLAMER LENS)	Inadequacy of Device Shape and/or Size; Device Operates Differently Than Expected	Blurred Vision; No Code Available	N/A	NA	1	Event Description: THE REPORTER INDICATED THAT THE SURGEON IMPLANTED A 13.2MM VICM513.2 IMPLANTABLE COLLAMER LENS, -3.50 DIOPTER IN THE PATIENT'S RIGHT EYE (OD) ON (B)(6) 2016. THE LENS WAS EXPLANTED ON (B)(6) 20106 DUE TO LOW VAULTING AND REFRACTIVE SURPRISE. THE PATIENT'S POST-OP BEST CORRECTED VISUAL ACUITY WAS 20/20. Manufacturer Narrative: ADDITIONAL INFORMATION: DEVICE EVALUATION: PRODUCT E…	Lens Extraction	Unknown
https://www.accessdata.fda.gov/scripts/cdrh/cfdocs/cfMAUDE/Detail.CFM?MDRFOI__ID=7268468&pc=MTA	2023826-2018-00181	2016-11-28	Injury	STAAR SURGICAL COMPANY	2018-02-13	MTA	IMPLANTABLE COLLAMER LENS (ICL)	Inadequacy of Device Shape and/or Size; Device Operates Differently Than Expected	Blurred Vision; No Code Available	N/A	NA	1	Event Description: THE REPORTER INDICATED THAT THE SURGEON IMPLANTED A 13.2 MM VICMO13.2, -12.00 DIOPTER, IMPLANTABLE COLLAMER LENS IN THE PATIENT'S RIGHT EYE (OD) ON (B)(6) 2016. ON (B)(6) 2017, THE LENS WAS EXPLANTED DUE TO EXCESSIVE VAULT AND REFRACTIVE CHANGE OVER TIME. THE SURGEON IS MAKING PLANS TO REPLACE THE LENS. Manufacturer Narrative: RETURNED PRODUCT EVALUATION FOUND LENS RETURNED DRY…	Lens Extraction	Unknown
https://www.accessdata.fda.gov/scripts/cdrh/cfdocs/cfMAUDE/Detail.CFM?MDRFOI__ID=6376873&pc=MTA	2023826-2017-00305	2016-12-29	Injury	STAAR SURGICAL COMPANY	2017-03-03	MTA	IMPLANTABLE COLLAMER LENS (ICL)	Inadequacy of Device Shape and/or Size; Device Operates Differently Than Expected	Blurred Vision; No Code Available	N/A	NA	1	Event Description: THE REPORTER INDICATED THAT THE SURGEON IMPLANTED A 12.6 MM VTICMO12.6, DIOPTER -5.50 IMPLANTABLE COLLAMER LENS, INTO THE PATIENT'S LEFT EYE (OS) ON (B)(6) 2016. THE PATIENT EXPERIENCES LOW VAULT, REFRACTIVE SURPRISE, AND RESIDUAL MYOPIA. AS OF THE DATE OF MDR REPORTING THE LENS REMAINS IMPLANTED. Manufacturer Narrative: THIS PRODUCT IS MANUFACTURED BUT NOT MARKETED IN THE U.S.…	Lens Retention	Unknown
https://www.accessdata.fda.gov/scripts/cdrh/cfdocs/cfMAUDE/Detail.CFM?MDRFOI__ID=7118994&pc=MTA	2023826-2017-01865	2017-09-08	Injury	STAAR SURGICAL COMPANY	2017-12-14	MTA	IMPLANTABLE COLLAMER LENS (ICL)	Inadequacy of Device Shape and/or Size; Device Operates Differently Than Expected	Blurred Vision; No Code Available	P030016	NA	1	Event Description: THE REPORTER INDICATED THAT THE SURGEON IMPLANTED A MICL13.7, -14.0 DIOPTER, IMPLANTABLE COLLAMER LENS IN THE PATIENT'S RIGHT EYE (OD) ON (B)(6) 2017. ON (B)(6) 2017, THE LENS WAS EXPLANTED DUE TO DECREASE VISUAL ACUITY. AT THE TIME OF SUBMISSION, ATTEMPTS TO OBTAIN ADDITIONAL INFORMATION HAVE BEEN UNSUCCESSFUL. Manufacturer Narrative: DEVICE EVALUATION: PRODUCT EVALUATION FOUN…	Lens Exchange	Resolved
https://www.accessdata.fda.gov/scripts/cdrh/cfdocs/cfMAUDE/Detail.CFM?MDRFOI__ID=7119003&pc=MTA	2023826-2017-01866	2017-09-08	Injury	STAAR SURGICAL COMPANY	2017-12-14	MTA	IMPLANTABLE COLLAMER LENS (ICL)	Inadequacy of Device Shape and/or Size; Device Operates Differently Than Expected	Blurred Vision; No Code Available	P030016	NA	1	Event Description: THE REPORTER INDICATED THAT THE SURGEON IMPLANTED A MICL13.7, -12.0 DIOPTER, IMPLANTABLE COLLAMER LENS IN THE PATIENT'S LEFT EYE (OS) ON (B)(6) 2017. ON (B)(6) 2017, THE LENS WAS EXPLANTED DUE TO DECREASE VISUAL ACUITY. AT THE TIME OF SUBMISSION, ATTEMPTS TO OBTAIN ADDITIONAL INFORMATION HAVE BEEN UNSUCCESSFUL. Manufacturer Narrative: CORRECTED DATA: DESCRIBE EVENT OR PROBLEM -…	Lens Exchange	Resolved
https://www.accessdata.fda.gov/scripts/cdrh/cfdocs/cfMAUDE/Detail.CFM?MDRFOI__ID=7281454&pc=MTA	2023826-2018-00259	2017-10-11	Injury	STAAR SURGICAL COMPANY	2018-02-19	MTA	IMPLANTABLE COLLAMER LENS	Inadequacy of Device Shape and/or Size; Device Operates Differently Than Expected	Blurred Vision; No Code Available	NA	NA	1	Event Description: THE REPORTER INDICATED THAT THE SURGEON IMPLANTED A 12.1MM VICM5_12.1 IMPLANTABLE COLLAMER LENS, -3.5 DIOPTER, INTO THE PATIENT'S LEFT EYE (OS) ON (B)(6) 2017. REPORTEDLY, THE LENS WAS LATER EXPLANTED DUE TO THE SIZE BEING "TOO SMALL" AND REFRACTIVE SURPRISE. Manufacturer Narrative: PRODUCT MANUFACTURED BUT NOT SOLD IN THE U.S. (B)(4).	Lens Extraction	Unknown
https://www.accessdata.fda.gov/scripts/cdrh/cfdocs/cfMAUDE/Detail.CFM?MDRFOI__ID=7200513&pc=MTA	2023826-2018-00099	2017-12-19	Injury	STAAR SURGICAL COMPANY AG	2018-01-17	MTA	IMPLANTABLE COLLAMER LENS (ICL)	Inadequacy of Device Shape and/or Size; Device Operates Differently Than Expected	Blurred Vision; No Code Available	NA	NA	1	Event Description: THE REPORTER INDICATED THE SURGEON IMPLANTED A 11.5 MM ICM115V4 IMPLANTABLE COLLAMER LENS, -12.0 DIOPTER, IN THE PATIENT'S RIGHT EYE (OD) ON (B)(6) 2006. THE REPORTER INDICATED THE LENS HAD A LOW VAULT AND THERE WAS A REFRACTIVE SURPRISE. THE SURGEON PLANS TO EXPLANT AND EXCHANGE THE LENS BUT TO DATE THE LENS REMAINS IMPLANTED. THE PATIENT EXPERIENCED DECREASED VISUAL ACUITY. L…	Lens Exchange + Secondary Operation	Resolved
https://www.accessdata.fda.gov/scripts/cdrh/cfdocs/cfMAUDE/Detail.CFM?MDRFOI__ID=7488976&pc=MTA	2023826-2018-00678	2018-04-16	Injury	STAAR SURGICAL COMPANY	2018-05-04	MTA	IMPLANTABLE COLLAMER LENS (ICL)	Inadequacy of Device Shape and/or Size; Device Operates Differently Than Expected	Blurred Vision; No Code Available	NA	NA	1	Event Description: THE REPORTER INDICATED THE SURGEON IMPLANTED A 13.7MM VICM5_13.7 IMPLANTABLE COLLAMER LENS, -10.00 DIOPTER, IN THE PATIENT'S RIGHT EYE (OD), ON (B)(6) 2018. THE REPORTER INDICATED THE LENS HAD EXCESSIVE VAULTING AND REFRACTIVE SURPRISE. THE LENS REMAINS IMPLANTED BUT THE SURGEON PLANS TO EXPLANT AND EXCHANGE FOR ANOTHER LENS. THE REPORTER INDICATED THEY FELT THE CAUSE OF THE EV…	Lens Exchange	Resolved
https://www.accessdata.fda.gov/scripts/cdrh/cfdocs/cfMAUDE/Detail.CFM?MDRFOI__ID=7527890&pc=MTA	2023826-2018-00736	2018-04-20	Injury	STAAR SURGICAL COMPANY	2018-05-18	MTA	IMPLANTABLE COLLAMER LENS (ICL)	Inadequacy of Device Shape and/or Size; Device Operates Differently Than Expected	Blurred Vision; No Code Available	NA	NA	1	Event Description: THE REPORTER INDICATED THE SURGEON IMPLANTED A 13.2MM VICMO13.2 IMPLANTABLE COLLAMER LENS, -18.00 DIOPTER, IN THE PATIENT'S RIGHT EYE (OD), ON (B)(6) 2018. THE LENS WAS EXPLANTED ON (B)(6) 2018 DUE TO EXCESSIVE VAULTING, SIGNIFICANT REDUCTION OF IRIDO-CORNEAL ANGLES AND REFRACTIVE SURPRISE. THE LENS WAS EXCHANGED FOR A SHORTER LENS AND THE PROBLEM WAS RESOLVED. Manufacturer Nar…	Lens Exchange	Resolved
https://www.accessdata.fda.gov/scripts/cdrh/cfdocs/cfMAUDE/Detail.CFM?MDRFOI__ID=5975336&pc=MTA	2023826-2016-01313	2016-07-11	Injury	STAAR SURGICAL COMPANY	2016-09-23	MTA	ICL (IMPLANTABLE COLLAMER LENS)	Inadequacy of Device Shape and/or Size; Device Operates Differently Than Expected; Appropriate Term/Code Not Available	Blurred Vision; No Code Available	NA	NA	1	Event Description: THE REPORTER INDICATED THE SURGEON IMPLANTED A 13.2MM VICMO13.2 IMPLANTABLE COLLAMER LENS, -12.0 DIOPTER, IN THE PATIENT'S RIGHT EYE (OD) ON (B)(6) 2016. THE LENS WAS EXPLANTED ON (B)(6) 2016 DUE TO EXCESSIVE VAULTING, REFRACTIVE SURPRISE AND RETINAL REPAIR. THE LENS WAS EXCHANGED FOR A SHORTER LENS. Manufacturer Narrative: DEVICE EVALUATION: PRODUCT EVALUATION FOUND THAT THE L…	Lens Exchange	Resolved
https://www.accessdata.fda.gov/scripts/cdrh/cfdocs/cfMAUDE/Detail.CFM?MDRFOI__ID=5826245&pc=MTA	2023826-2016-00256	2015-11-18	Injury	STAAR SURGICAL COMPANY	2016-07-27	MTA	ICL (IMPLANTABLE COLLAMER LENS)	Inadequacy of Device Shape and/or Size; Unintended Movement; Appropriate Term/Code Not Available	Blurred Vision; No Code Available	NA	NA	1	Event Description: THE REPORTER INDICATED THE SURGEON IMPLANTED A 13.2MM VICMO13.2 IMPLANTABLE COLLAMER LENS, -05.00 DIOPTER, IN THE PATIENT'S LEFT EYE (OS) ON (B)(6) 2015. THE LENS WAS EXPLANTED ON (B)(6) 2015 DUE TO EXCESSIVE VAULTING, LENS DISLOCATION/SUBLUXATION AND REFRACTIVE CHANGE OVERTIME. THE LENS WAS EXCHANGED FOR A SHORTER LENS AND THE PROBLEM WAS RESOLVED. THE PATIENT'S POST-OP BEST-C…	Lens Exchange	Resolved
https://www.accessdata.fda.gov/scripts/cdrh/cfdocs/cfMAUDE/Detail.CFM?MDRFOI__ID=6191011&pc=MTA	2023826-2016-01785	2016-01-30	Injury	STAAR SURGICAL COMPANY	2016-12-20	MTA	IMPLANTABLE COLLAMER LENS	Insufficient Information	Blurred Vision; No Code Available	NA	NA	1	Event Description: THE REPORTER INDICATED THAT THE SURGEON IMPLANTED A 12.6MM VICMO12.6 IMPLANTABLE COLLAMER LENS, -14.00 DIOPTER, IN THE PATIENT'S RIGHT EYE (OD). THIS WAS PERFORMED ON (B)(6) 2016. AFTER IMPLANTATION, REFRACTIVE SURPRISE AND A LOSS OF BCVA WAS OBSERVED (20/40 PRE-OPERATIVE TO 20/70 POST-OPERATIVE). THE PATIENT COMPLAINED OF BLURRED VISION IMMEDIATELY AFTER SURGERY. AS OF THE DAT…	Lens Retention	Unknown
https://www.accessdata.fda.gov/scripts/cdrh/cfdocs/cfMAUDE/Detail.CFM?MDRFOI__ID=6900450&pc=MTA	2023826-2017-01487	2017-07-07	Injury	STAAR SURGICAL COMPANY	2017-09-28	MTA	IMPLANTABLE COLLAMER LENS (ICL)	Insufficient Information	Blurred Vision; No Code Available	NA	NA	1	Event Description: THE REPORTER INDICATED THE SURGEON IMPLANTED A 13.2 MM VICMO13.2 IMPLANTABLE COLLAMER LENS, -14.50 DIOPTER, IN THE PATIENT'S RIGHT EYE (OD), ON (B)(6) 2017. THE LENS WAS EXPLANTED ON (B)(6) 2017 DUE TO SURGEON NOTED REFRACTIVE CHANGE OVERTIME. THE LENS WAS EXCHANGED FOR ANOTHER SAME LENGTH (13.2) BUT DIFFERENT DIOPTER (-12.0), AND THE PROBLEM WAS RESOLVED. THE PATIENT'S POST-OP…	Lens Exchange	Resolved
https://www.accessdata.fda.gov/scripts/cdrh/cfdocs/cfMAUDE/Detail.CFM?MDRFOI__ID=6962643&pc=MTA	2023826-2017-01592	2017-08-11	Injury	STAAR SURGICAL COMPANY	2017-10-19	MTA	IMPLANTABLE COLLAMER LENS (ICL)	Insufficient Information	Blurred Vision; No Code Available	NA	NA	1	Event Description: THE REPORTER INDICATED THE SURGEON IMPLANTED A 12.6 MM VICMO12.6 IMPLANTABLE COLLAMER LENS, -04.00 DIOPTER, IN THE PATIENT'S LEFT EYE (OS), ON (B)(6) 2017. THE LENS WAS EXPLANTED ON (B)(6) 2017 DUE TO BLURRED VISION. THE LENS WAS EXCHANGED FOR A DIFFERENT MODEL (VTICMO12.6) AND DIOPTER (-5.0/+1.5/098) LENS. THE LENS EXCHANGE RESOLVED THE PROBLEM. THE PATIENT'S POST-OP BEST-CORR…	Lens Exchange	Resolved
https://www.accessdata.fda.gov/scripts/cdrh/cfdocs/cfMAUDE/Detail.CFM?MDRFOI__ID=10451075&pc=MTA	2023826-2020-01854	2016-12-28	Malfunction	STAAR SURGICAL COMPANY	2020-08-25	MTA	IMPLANTABLE COLLAMER LENS (ICL)	Misfocusing	Blurred Vision; No Code Available	N/A	NA	1	Event Description: THE REPORTER INDICATED THAT THE SURGEON IMPLANTED A 12.5MM ICM125V4, -03.5 DIOPTER, IMPLANTABLE COLLAMER LENS INTO THE PATIENT'S LEFT EYE (OS) ON (B)(6) 2012. REFRACTIVE CHANGE OVERTIME AND RESIDUAL MYOPIA WAS OBSERVED. THE LENS REMAINS IMPLANTED. ADDITIONAL INFORMATION HAS BEEN REQUESTED BUT NONE HAS BEEN FORTHCOMING. IF ADDITIONAL INFORMATION IS RECEIVED A SUPPLEMENTAL MEDWAT…	Lens Retention	Unknown
https://www.accessdata.fda.gov/scripts/cdrh/cfdocs/cfMAUDE/Detail.CFM?MDRFOI__ID=10451111&pc=MTA	2023826-2020-01853	2016-12-28	Malfunction	STAAR SURGICAL COMPANY	2020-08-25	MTA	IMPLANTABLE COLLAMER LENS (ICL)	Misfocusing	Blurred Vision; No Code Available	N/A	NA	1	Event Description: THE REPORTER INDICATED THAT THE SURGEON IMPLANTED A 12.5MM ICM125V4, -04.5 DIOPTER, IMPLANTABLE COLLAMER LENS INTO THE PATIENT'S RIGHT EYE (OD) ON (B)(6) 2012. REFRACTIVE CHANGE OVERTIME AND RESIDUAL MYOPIA WAS OBSERVED. THE LENS REMAINS IMPLANTED. CAUSE OF THE EVENT IS REPORTED AS UNKNOWN. ADDITIONAL INFORMATION HAS BEEN REQUESTED BUT NONE HAS BEEN FORTHCOMING. IF ADDITIONAL I…	Lens Retention	Unknown
https://www.accessdata.fda.gov/scripts/cdrh/cfdocs/cfMAUDE/Detail.CFM?MDRFOI__ID=8055981&pc=MTA	2023826-2018-01622	2017-09-29	Injury	STAAR SURGICAL COMPANY	2018-11-09	MTA	IMPLANTABLE COLLAMER LENS (ICL)	Misfocusing	Blurred Vision; No Code Available	N/A	NA	1	Event Description: THE REPORTER INDICATED THAT THE SURGEON IMPLANTED A 13.2MM VICM5_13.2, -3.50 DIOPTER, IMPLANTABLE COLLAMER LENS INTO THE PATIENT'S LEFT EYE (OS) ON (B)(6) 2017. ON (B)(6) 2018 THE LENS WAS EXCHANGED WITH A DIFFERENT DIOPTER LENS DUE TO REFRACTIVE SURPRISE. THIS EXCHANGE RESOLVED THE PROBLEM. Manufacturer Narrative: DEVICE EVALUATION: THE LENS WAS RETURNED IN LIQUID IN A LENS CA…	Lens Exchange	Resolved
https://www.accessdata.fda.gov/scripts/cdrh/cfdocs/cfMAUDE/Detail.CFM?MDRFOI__ID=7773081&pc=MTA	2023826-2018-01192	2017-11-24	Injury	STAAR SURGICAL COMPANY AG	2018-08-10	MTA	IMPLANTABLE COLLAMER LENS (ICL)	Misfocusing	Blurred Vision; No Code Available	NA	NA	1	Event Description: THE REPORTER INDICATED THE SURGEON IMPLANTED A 12.0MM ICM120V4 IMPLANTABLE COLLAMER LENS, -13.0 DIOPTER, IN THE PATIENT'S LEFT EYE (OS) ON (B)(6) 2009. THE REPORTER INDICATED THE PATIENT EXPERIENCED REFRACTIVE CHANGE OVERTIME. THE PATIENT DECIDED TO PROCEED WITH LASEK, WHICH WAS PERFORMED ON (B)(6) 2018 AND THE PROBLEM WAS RESOLVED. THE LENS REMAINS IMPLANTED. Manufacturer Narr…	Lens Retention + Secondary Operation	Resolved
[truncated: 703 more rows]
