# Supplementary material for: Adverse events associated with Implantable Collamer Lens: insights from the FDA MAUDE database
Source: Front Med (Lausanne). 2025 Jul 21;12:1613060. doi: 10.3389/fmed.2025.1613060 (PMC12319018; doi:10.3389/fmed.2025.1613060)
Supplement: Supplementary file 13 [file Table_12.XLSX]

## Sheet: IOP Issue-1
Web Address	Report Number	Event Date	Event Type	Manufacturer	Date Received	Product Code...37	Brand Name	Device Problem	Patient Problem	PMA/PMN Number	Exemption Number	Number of Events	Event Text	Management	Outcomes
https://www.accessdata.fda.gov/scripts/cdrh/cfdocs/cfMAUDE/Detail.CFM?MDRFOI__ID=8970000&pc=QCB	2023826-2019-01541	2019-07-31 04:00:00	Injury	STAAR SURGICAL COMPANY	2019-09-06 04:00:00	QCB	IMPLANTABLE COLLAMER LENS (ICL)	Off-Label Use; Inadequacy of Device Shape and/or Size; Improper or Incorrect Procedure or Method	Cataract; Corneal Edema; Intraocular Pressure Increased; No Code Available	N/A	NA	1	Event Description: THE REPORTER INDICATED THAT A 12.6MM, VTICMO12.6, -12.50/3.0/093 (SPHERE/CYLINDER/AXIS), IMPLANTABLE COLLAMER LENS WAS IMPLANTED INTO THE PATIENT'S RIGHT EYE (OD) ON (B)(6) 2019. ANGLE CLOSURE WITH ELEVATED IOP (26 MMHG) AND LOW VAULT WERE ASSESSED ON (B)(6) 2019. EYE STATUS ON (B)(6) 2019, "AC QUIET WITH MINIMAL CORNEAL EDEMA. NEAR VA J8." LENS REMAINS IMPLANTED. Manufacturer …	Lens Exchange	Resolved
https://www.accessdata.fda.gov/scripts/cdrh/cfdocs/cfMAUDE/Detail.CFM?MDRFOI__ID=9874226&pc=QCB	2023826-2020-00634	2020-02-21 05:00:00	Injury	STAAR SURGICAL COMPANY	2020-03-24 04:00:00	QCB	IMPLANTABLE COLLAMER LENS (ICL)	Misfocusing; Adverse Event Without Identified Device or Use Problem	Cataract; Inflammation; Intraocular Pressure Increased; Blurred Vision; No Code Available	N/A	NA	1	Event Description: THE REPORTER INDICATED THAT A 13.2MM, VTICM5_13.2, -11.50/+2.0/95 (SPHERE/CYLINDER/AXIS) IMPLANTABLE COLLAMER LENS WAS IMPLANTED INTO THE PATIENTS LEFT EYE (OS) ON (B)(6) 2020. PIGMENT DISPERSION, UNREACTIVE (FIXED) PUPIL, BLURRED VISION, IRIS ATROPHY, LENS OPACITY ASC AND PUPIL BLOCK WERE OBSERVED. SECONDARY SURGICAL INTERVENTION (YAG AND ANTERIOR CHAMBER IRRIGATION) AND MEDIC…	Lens Retention + Secondary Operation	Unknown
https://www.accessdata.fda.gov/scripts/cdrh/cfdocs/cfMAUDE/Detail.CFM?MDRFOI__ID=9107370&pc=QCB	2023826-2019-01751	2019-05-30 04:00:00	Injury	STAAR SURGICAL COMPANY	2019-09-23 04:00:00	QCB	IMPLANTABLE COLLAMER LENS (ICL)	Adverse Event Without Identified Device or Use Problem; Unintended Movement	Cataract; Inflammation; Intraocular Pressure Increased; Pain; Visual Disturbances; No Code Available	NA	NA	1	Event Description: THE REPORTER INDICATED THE SURGEON IMPLANTED A 12.1MM VTICMO12.1 IMPLANTABLE COLLAMER LENS -18.00/+1.0/177 (SPHERE/CYLINDER/AXIS) IN THE PATIENTS RIGHT EYE (OD) ON (B)(6) 2019. A COUPLE OF HOURS AFTER THE INITIAL SURGERY, THE PATIENT EXPERIENCED PAIN AND A NEGATIVE EFFECT ON HER VISION. A CATARACT HAD DEVELOPED. THE LENS WILL BE EXPLANTED BUT TO DATE REMAINS IMPLANTED. ADDITION…	Lens Retention	Unknown
https://www.accessdata.fda.gov/scripts/cdrh/cfdocs/cfMAUDE/Detail.CFM?MDRFOI__ID=16261376&pc=QCB	2023826-2023-00326	2022-12-15 05:00:00	Injury	STAAR SURGICAL COMPANY	2023-01-28 05:00:00	QCB	IMPLANTABLE COLLAMER LENS (ICL)	Misfocusing; Improper or Incorrect Procedure or Method	Cataract; Intraocular Pressure Increased; Blurred Vision; Appropriate Clinical Signs, Symptoms, Conditions Term / Code Not Available	P030016	NA	1	Event Description: THE REPORTER (PATIENT CURRENT OBSERVING DOCTOR) STATES THAT A SURGEON AT A DIFFERENT CLINIC IMPLANTED A 13.7MM VTICMO 3.7 IMPLANTABLE COLLAMER LENS OF -7.00/0.5/085 (SPHERE/CYLINDER/AXIS) WAS IMPLANTED INTO THE PATIENTS RIGHT EYE (OD) ON (B)(6) 2022. THE CURRENT OBSERVING DOCTOR SAW PATIENT FOR THE FIRST TIME ON (B)(6) 2022, WHERE HE UNFORTUNATELY BECAME AWARE OF SEVERAL MEDICA…	Unknown	Unknown
https://www.accessdata.fda.gov/scripts/cdrh/cfdocs/cfMAUDE/Detail.CFM?MDRFOI__ID=10538715&pc=QCB	2023826-2020-02049	2020-07-08	Injury	STAAR SURGICAL COMPANY	2020-09-15	QCB	IMPLANTABLE COLLAMER LENS (ICL)	Off-Label Use; Optical Problem	Cataract; Intraocular Pressure Increased; Nausea; Pupillary Block; Blurred Vision; Vomiting; Halo; Appropriate Clinical Signs, Symptoms, Conditions Term / Code Not Available	N/A	NA	1	Event Description: THE REPORTER INDICATED THAT THE SURGEON IMPLANTED A 13.2MM VTICMO13.2 IMPLANTABLE COLLAMER LENS, -17.50/1.50/080 (SPHERE/CYLINDER/AXIS) INTO THE PATIENT'S RIGHT EYE (OD) ON (B)(6)2020. ON (B)(6) 2020 THE SURGEON ASSESSED AN ELEVATED IOP OF 22MMHG. THIS WAS CONTROLLED WITHIN THE FIRST 24 HOURS WITH MEDICATION. ALSO REPORTED IS PIGMENT DISPERSION, UNREACTIVE (FIXED) PUPIL, DILATE…	Lens Retention	Resolved
https://www.accessdata.fda.gov/scripts/cdrh/cfdocs/cfMAUDE/Detail.CFM?MDRFOI__ID=8807833&pc=QCB	2023826-2019-01275	2019-04-18 04:00:00	Injury	STAAR SURGICAL COMPANY	2019-07-19 04:00:00	QCB	IMPLANTABLE COLLAMER LENS (ICL)	Adverse Event Without Identified Device or Use Problem	Cataract; Intraocular Pressure Increased; No Code Available	N/A	NA	1	Event Description: THE REPORTER INDICATED THAT A 13.2 MM, VTICMO13.2, -11.00/1.0/155 (SPHERE/CYLINDER/AXIS), IMPLANTABLE COLLAMER LENS WAS IMPLANTED INTO THE PATIENTS RIGHT EYE (OD) ON (B)(6) 2019. THE DAY AFTER OPERATION THE EYE HAD UNDERGONE MYDRIASIS, WHICH WAS IMPOSSIBLE TO NARROW. ON (B)(6) 2019 THE LENS WAS EXPLANTED. THE SURGEON STATED " THE EVENT WAS DUE TO AN UNKNOWN PROBLEM. I CAN ONLY …	Lens Extraction	Unknown
https://www.accessdata.fda.gov/scripts/cdrh/cfdocs/cfMAUDE/Detail.CFM?MDRFOI__ID=15620830&pc=QCB	2023826-2022-03493	2022-08-30 04:00:00	Injury	STAAR SURGICAL COMPANY	2022-10-18 04:00:00	QCB	IMPLANTABLE COLLAMER LENS (ICL)	Adverse Event Without Identified Device or Use Problem	Cataract; Intraocular Pressure Increased; Pupillary Block; Appropriate Clinical Signs, Symptoms, Conditions Term / Code Not Available	P030016	NA	1	Event Description: THE REPORTER INDICATED THE SURGEON IMPLANTED A 13.2MM VTICM5_13.2 IMPLANTABLE COLLAMER LENS, -12.00/+1.0/084, INTO THE PATIENTS RIGHT EYE (OD) ON (B)(6) 2022. THE LENS WAS REMOVED ON (B)(6) 2022 DUE TO PUPIL BLOCK WITH ELEVATED INTRAOCULAR PRESSURE (IOP) AND THE DEVELOPMENT OF AN ANTERIOR SUBCAPSULAR (ASC) CATARACT. PHACO-EMULSIFICATION (CATARACT SURGERY) WAS PERFORMED AND AN I…	Lens Extraction + Secondary Operation	Resolved
https://www.accessdata.fda.gov/scripts/cdrh/cfdocs/cfMAUDE/Detail.CFM?MDRFOI__ID=13698235&pc=QCB	2023826-2022-00761	2022-01-17 05:00:00	Injury	STAAR SURGICAL COMPANY	2022-03-08 05:00:00	QCB	IMPLANTABLE COLLAMER LENS (ICL)	Misfocusing	Conjunctivitis; Corneal Edema; Intraocular Pressure Increased; Pain; Pupillary Block; Blurred Vision; Appropriate Clinical Signs, Symptoms, Conditions Term / Code Not Available	NA	NA	1	Event Description: THE REPORTER INDICATED THAT THE SURGEON IMPLANTED A 12.6MM VTICM5_12.6; -10.00/+2.50/91 (SPHERE/CYLINDER/AXIS) IMPLANTABLE COLLAMER LENS INTO THE PATIENT'S RIGHT EYE (OD) ON (B)(6) 2022. THE PATIENT INTRAOCULAR PRESSURE INCREASED AND COMPLAINED OF BLURRY VISION AND PAIN ON THE DAY OF SURGERY; MEDICATION WAS PRESCRIBED AND THE SURGEON PERFORMED IRRIGATION BEFORE SENDING HER HOME…	Lens Retention + Secondary Operation	Resolved
https://www.accessdata.fda.gov/scripts/cdrh/cfdocs/cfMAUDE/Detail.CFM?MDRFOI__ID=12840739&pc=QCB	2023826-2021-04397	2021-09-21 04:00:00	Injury	STAAR SURGICAL COMPANY	2021-11-18 05:00:00	QCB	IMPLANTABLE COLLAMER LENS (ICL)	Misfocusing; Adverse Event Without Identified Device or Use Problem	Corneal Decompensation; Corneal Edema; Blurred Vision; Discomfort; Eye Pain	NA	NA	1	Event Description: THE REPORTER INDICATED THAT THE SURGEON IMPLANTED A 13.2MM VTICMO13.2 IMPLANTABLE COLLAMER LENS, -7.0/+0.5/089 (SPHERE/CYLINDER/AXIS) INTO THE PATIENT'S RIGHT EYE (OD) ON (B)(6)2021. ON (B)(6) 2021 THE LENS WAS EXPLANTED DUE TO CORNEAL DECOMPENSATION. REPORTEDLY, "HOURS AFTER UNEVENTFUL SURGERY, PAIN, DECREASED VISION; ON EXAMINATION: CORNEAL DECOMPENSATION, NO DETAILS VISIBLE.…	Lens Extraction	Not_Resolved
https://www.accessdata.fda.gov/scripts/cdrh/cfdocs/cfMAUDE/Detail.CFM?MDRFOI__ID=10634551&pc=QCB	2023826-2020-02295	2020-09-12 04:00:00	Injury	STAAR SURGICAL COMPANY	2020-10-06 04:00:00	QCB	IMPLANTABLE COLLAMER LENS (ICL)	Inadequacy of Device Shape and/or Size	Corneal Decompensation; Corneal Edema; Intraocular Pressure Increased; Appropriate Clinical Signs, Symptoms, Conditions Term / Code Not Available	NA#S-P#NA	NA	1	Event Description: THE REPORTER INDICATED THE SURGEON IMPLANTED A 13.2MM VTICMO13.2 IMPLANTABLE COLLAMER LENS, -12.00/+5.0/085 (SPHERE/CYLINDER/AXIS), IN THE PATIENTS LEFT EYE (OS), ON (B)(6) 2020. THE LENS WAS REPORTED AS HAVING EXCESSIVE VAULTING, ELEVATED INTRAOCULAR PRESSURE (IOP), SIGNIFICANT REDUCTION OF IRIDO-CORNEAL ANGLES, CORNEAL DECOMPENSATION (CORNEAL EDEMA) AND UNREACTIVE (FIXED) PUP…	Lens Exchange	Resolved
https://www.accessdata.fda.gov/scripts/cdrh/cfdocs/cfMAUDE/Detail.CFM?MDRFOI__ID=11558781&pc=QCB	2023826-2021-00704	2021-02-23 05:00:00	Injury	STAAR SURGICAL COMPANY	2021-03-23 04:00:00	QCB	IMPLANTABLE COLLAMER LENS	Misfocusing; Inadequacy of Device Shape and/or Size	Corneal Decompensation; Corneal Edema; Intraocular Pressure Increased; Blurred Vision; Appropriate Clinical Signs, Symptoms, Conditions Term / Code Not Available	P030016	NA	1	Event Description: THE REPORTER INDICATED THAT THE SURGEON IMPLANTED A 13.2MM TMICL13.2 IMPLANTABLE COLLAMER LENS -15.0/+2.0/092 (SPHERE/CYLINDER/AXIS) INTO THE PATIENT'S RIGHT (OD) EYE. THE SURGEON REPORTS IOP CONTROLLED WITH ALPHAGAM, HIGH VAULT, SHALLOW AC, "CRAPPY" VISION AT 20/200 AND PUPIL IS DILATED. Manufacturer Narrative: B5-ADDITIONAL INFORMATION: SIGNIFICANT REDUCTION OF ICA, CORNEAL D…	Lens Retention	Resolved
https://www.accessdata.fda.gov/scripts/cdrh/cfdocs/cfMAUDE/Detail.CFM?MDRFOI__ID=11558806&pc=QCB	2023826-2021-00699	2021-02-23 05:00:00	Injury	STAAR SURGICAL COMPANY	2021-03-23 04:00:00	QCB	IMPLANTABLE COLLAMER LENS	Misfocusing; Inadequacy of Device Shape and/or Size	Corneal Decompensation; Corneal Edema; Intraocular Pressure Increased; Pupillary Block; Blurred Vision; Appropriate Clinical Signs, Symptoms, Conditions Term / Code Not Available; No Clinical Signs, Symptoms or Conditions	P030016	NA	1	Event Description: THE REPORTER INDICATED THAT THE SURGEON IMPLANTED A 13.7MM TMICL13.7 IMPLANTABLE COLLAMER LENS -15.5/+2.0/092 (SPHERE/CYLINDER/AXIS) INTO THE PATIENT'S RIGHT (OD) EYE. THE SURGEON REPORTEDLY EXPLANTED THE LENS AND REPLACED IT WITH A SHORTER LENS BECAUSE THE LENS WAS "TOO BIG." Manufacturer Narrative: B5: ADDITIONAL INFORMATION: EXCESSIVE VAULT-TOUCHING THE CORNEA, ELEVATED IOP,…	Lens Exchange	Resolved
https://www.accessdata.fda.gov/scripts/cdrh/cfdocs/cfMAUDE/Detail.CFM?MDRFOI__ID=12741585&pc=QCB	2023826-2021-04219	2021-09-10	Injury	STAAR SURGICAL COMPANY	2021-11-02	QCB	IMPLANTABLE COLLAMER LENS (ICL)	Inadequacy of Device Shape and/or Size	Corneal Decompensation; Intraocular Pressure Increased; Appropriate Clinical Signs, Symptoms, Conditions Term / Code Not Available; No Clinical Signs, Symptoms or Conditions	NA	NA	1	Event Description: THE REPORTER INDICATED THAT THE SURGEON IMPLANTED A 13.7MM VTICMO13.7; -16.0/2.5/99 (SPHERE/CYLINDER/AXIS) IMPLANTABLE COLLAMER LENS INTO THE PATIENT'S RIGHT EYE (OD) ON (B)(6)2021. ON THE SAME DATE IN A SEPARATE SURGERY THE LENS WAS EXPLANTED AND AT A LATER DATE REPLACED WITH A SHORTER LENGTH LENS DUE TO EXCESSIVE VAULTING; ANGLE CLOSURE WITH ELEVATED INTRAOCULAR PRESSURE AND …	Lens Exchange	Resolved
https://www.accessdata.fda.gov/scripts/cdrh/cfdocs/cfMAUDE/Detail.CFM?MDRFOI__ID=8699716&pc=QCB	2023826-2019-00980	NA	Injury	STAAR SURGICAL COMPANY	2019-06-14 04:00:00	QCB	IMPLANTABLE COLLAMER LENS (ICL)	Misfocusing; Adverse Event Without Identified Device or Use Problem; Appropriate Term/Code Not Available	Corneal Decompensation; Intraocular Pressure Increased; Blurred Vision; No Code Available	N/A	NA	1	Event Description: THE REPORTER INDICATED THAT A 13.2MM, VTICM5_13.2, -9.50/5.5/103 (SPHERE/CYLINDER/AXIS), IMPLANTABLE COLLAMER LENS WAS IMPLANTED INTO THE PATIENT'S LEFT EYE (OS) ON (B)(6) 2019. PUPIL BLOCK WITH ELEVATED IOP (50MMHG), CORNEAL DECOMPENSATION, PIGMENT DISPERSION, UNREACTIVE (FIXED) PUPIL, BLURRED VISION, AND IRIS ATROPHY WAS OBSERVED. ANTERIOR CHAMBER IRRIGATION/EVACUATION OF VIS…	Lens Extraction + Secondary Operation	Resolved
https://www.accessdata.fda.gov/scripts/cdrh/cfdocs/cfMAUDE/Detail.CFM?MDRFOI__ID=8984533&pc=QCB	2023826-2019-01677	2019-03-15 04:00:00	Injury	STAAR SURGICAL COMPANY	2019-09-10 04:00:00	QCB	IMPLANTABLE COLLAMER LENS (ICL)	Off-Label Use; Inadequacy of Device Shape and/or Size	Corneal Decompensation; Intraocular Pressure Increased; No Code Available	NA	NA	1	Event Description: THE REPORTER INDICATED THE SURGEON IMPLANTED A 13.2MM VTICM5_13.2 IMPLANTABLE COLLAMER LENS, -4.5/+3.0/094 (SPHERE/CYLINDER/AXIS) IN THE PATIENTS RIGHT EYE (OD) ON (B)(6) 2019. THE LENS WAS EXPLANTED ON (B)(6) 2019 DUE TO EXCESSIVE VAULTING, PUPIL BLOCK, WITH ELEVATED INTRAOCULAR PRESSURE, CORNEAL DECOMPENSATION AND UNREACTIVE (FIXED) PUPIL. THERE WAS AN ADDITION OF NEW PERIPHE…	Lens Extraction + Secondary Operation	Resolved
https://www.accessdata.fda.gov/scripts/cdrh/cfdocs/cfMAUDE/Detail.CFM?MDRFOI__ID=12242256&pc=QCB	2023826-2021-02943	NA	Injury	STAAR SURGICAL COMPANY	2021-07-28	QCB	IMPLANTABLE COLLAMER LENS (ICL)	Adverse Event Without Identified Device or Use Problem	Corneal Edema; Glaucoma; Intraocular Pressure Increased; Appropriate Clinical Signs, Symptoms, Conditions Term / Code Not Available	NA	NA	1	Event Description: THE REPORTER INDICATED THAT THE SURGEON IMPLANTED A 12.1MM VTICMO12.1; -15.5/2.5/111 (SPHERE/CYLINDER/AXIS) IMPLANTABLE COLLAMER LENS INTO THE PATIENT'S RIGHT EYE (OD) ON (B)(6) 2021. THE SURGEON REPORTED ELEVATED INTRAOCULAR PRESSURE WITHOUT PUPIL BLOCK; (IN (B)(6)) HYPHEMA ON THE ANTERIOR AND POSTERIOR SURFACE OF THE ICL AND WAS PRESCRIBED MEDICATION WHICH THE EYE RECOVERED T…	Lens Retention	Resolved
https://www.accessdata.fda.gov/scripts/cdrh/cfdocs/cfMAUDE/Detail.CFM?MDRFOI__ID=17935878&pc=QCB	2023826-2023-04537	2023-04-26 04:00:00	Injury	STAAR SURGICAL COMPANY	2023-10-13 04:00:00	QCB	IMPLANTABLE COLLAMER LENS (ICL)	Device Dislodged or Dislocated; Optical Problem	Corneal Edema; Headache; Blurred Vision; Eye Pain	P030016	NA	1	Event Description: THE REPORTER INDICATED THAT THE SURGEON IMPLANTED A 13.2MM TMICL13.2; -12.5/+1.00/179 (SPHERE/CYLINDER/AXIS) IMPLANTABLE COLLAMER LENS INTO THE PATIENT'S RIGHT EYE (OD) ON (B)(6)2023. THE PATIENT EXPERIENCED LENS ROTATION, THE SURGEON ALSO NOTED HEADACHES, CORNEAL EDEMA, BLURRY VISION AND GLARES. LENS REMAINS IMPLANTED. THE CAUSE OF THE EVENT WAS REPORTED AS USER ERROR - PREOP …	Lens Retention	Unknown
https://www.accessdata.fda.gov/scripts/cdrh/cfdocs/cfMAUDE/Detail.CFM?MDRFOI__ID=16390681&pc=QCB	2023826-2023-00595	2022-04-13 04:00:00	Injury	STAAR SURGICAL COMPANY	2023-02-16 05:00:00	QCB	IMPLANTABLE COLLAMER LENS (ICL)	Off-Label Use	Corneal Edema; Inflammation; Intraocular Pressure Increased; Appropriate Clinical Signs, Symptoms, Conditions Term / Code Not Available	P030016	NA	1	Event Description: THE REPORTER INDICATED THAT A 13.2MM VTICM5 13.2 IMPLANTABLE COLLAMER LENS OF -14.0/1.5/021 (SPHERE/CYLINDER/AXIS) WAS IMPLANTED INTO THE PATIENTS RIGHT EYE (OD) ON (B)(6) 2022. ON (B)(6) 2021 THE LENS WAS EXPLANTED DUE TO ELEVATED IOP. PHACO-EMULSIFICATION (CATARACT SURGERY) AND IOL IMPLANTATION WAS PERFORMED AND THE PROBLEM WAS RESOLVED. CAUSE WAS "INFLAMMATORY REACTION DUE T…	Lens Extraction + Secondary Operation	Resolved
https://www.accessdata.fda.gov/scripts/cdrh/cfdocs/cfMAUDE/Detail.CFM?MDRFOI__ID=11334443&pc=QCB	2023826-2021-00358	2021-01-18 05:00:00	Injury	STAAR SURGICAL COMPANY	2021-02-16 05:00:00	QCB	IMPLANTABLE COLLAMER LENS (ICL)	Adverse Event Without Identified Device or Use Problem	Corneal Edema; Intraocular Pressure Increased; Appropriate Clinical Signs, Symptoms, Conditions Term / Code Not Available	P030016	NA	1	Event Description: THE REPORTER INDICATED THE SURGEON IMPLANTED A 13.7MM TMICL13.7 IMPLANTABLE COLLAMER LENS, -09.50/+1.5/104 (SPHERE/CYLINDER/AXIS), IN THE PATIENTS RIGHT EYE (OD) ON (B)(6) 2021. THE LENS WAS EXPLANTED ON (B)(6) 2021 DUE TO ANGLE CLOSURE WITH ELEVATED INTRAOCULAR PRESSURE. ANOTHER LENS WAS NOT IMPLANTED. CAUSE OF THE EVENT WAS DUE TO THE DEVICE. POST-OP MILD CORNEAL EDEMA. THE L…	Lens Extraction	Unknown
https://www.accessdata.fda.gov/scripts/cdrh/cfdocs/cfMAUDE/Detail.CFM?MDRFOI__ID=12005314&pc=QCB	2023826-2021-01926	2021-05-16 04:00:00	Injury	STAAR SURGICAL COMPANY	2021-06-15 04:00:00	QCB	IMPLANTABLE COLLAMER LENS (ICL)	Off-Label Use; Adverse Event Without Identified Device or Use Problem	Corneal Edema; Intraocular Pressure Increased; Appropriate Clinical Signs, Symptoms, Conditions Term / Code Not Available	P030016	NA	1	Event Description: THE REPORTER INDICATED THE SURGEON IMPLANTED A 13.2MM TMICL13.2 IMPLANTABLE COLLAMER LENS, -15.50/+1.5/090 (SPHERE/CYLINDER/AXIS), IN THE PATIENTS RIGHT EYE (OD) ON (B)(6) 2021. THE LENS WAS EXPLANTED ON (B)(6) 2021 DUE TO ANGLE CLOSURE AND ELEVATED INTRAOCULAR PRESSURE (IOP). ANOTHER LENS WAS NOT IMPLANTED. THE IOP WAS FIRST LOWERED WITH PARACENTESIS AND TAMPONADE ICL/REFILL A…	Lens Extraction + Secondary Operation	Unknown
https://www.accessdata.fda.gov/scripts/cdrh/cfdocs/cfMAUDE/Detail.CFM?MDRFOI__ID=14645301&pc=QCB	2023826-2022-01780	2022-05-10 04:00:00	Injury	STAAR SURGICAL COMPANY	2022-06-09 04:00:00	QCB	IMPLANTABLE COLLAMER LENS (ICL)	Inadequacy of Device Shape and/or Size	Corneal Edema; Intraocular Pressure Increased; Appropriate Clinical Signs, Symptoms, Conditions Term / Code Not Available; No Clinical Signs, Symptoms or Conditions	P030016	NA	1	Event Description: THE REPORTER INDICATED THAT A 13.2MM, TMICL13.2, -16.00/2.5/095 (SPHERE/CYLINDER/AXIS) IMPLANTABLE COLLAMER LENS WAS EXPLANTED DUE TO SIZING ISSUES. ATTEMPTS TO OBTAIN ADDITIONAL INFORMATION HAVE NOT BEEN SUCCESSFUL. IF ADDITIONAL INFORMATION IS RECEIVED A SUPPLEMENTAL MEDWATCH REPORT WILL BE SUBMITTED. Manufacturer Narrative: B5-THE REPORTER INDICATED THAT A 13.2MM, TMICL13.2,…	Lens Exchange	Resolved
https://www.accessdata.fda.gov/scripts/cdrh/cfdocs/cfMAUDE/Detail.CFM?MDRFOI__ID=18473796&pc=QCB	2023826-2024-00131	2023-12-18 05:00:00	Injury	STAAR SURGICAL COMPANY	2024-01-09 05:00:00	QCB	IMPLANTABLE COLLAMER LENS (ICL)	Misfocusing; Inadequacy of Device Shape and/or Size	Corneal Edema; Intraocular Pressure Increased; Blurred Vision; Appropriate Clinical Signs, Symptoms, Conditions Term / Code Not Available	P030016	NA	1	Event Description: THE REPORTER INDICATED THAT THE SURGEON IMPLANTED AN IMPLANTABLE COLLAMER LENS INTO THE PATIENT'S EYE. EXCESSIVE VAULT AND ELEVATED IOP WAS OBSERVED. LENS REMAINS IMPLANTED. ADDITIONAL INFORMATION HAS BEEN REQUESTED BUT NONE HAS BEEN FORTHCOMING. Manufacturer Narrative: A1 - UNK. A2 - UNK. A3 - UNK. A4 - UNK. A5 - UNK. A6 - UNK. B3 - UNK. D2 - PRODUCT CODE: UNK (ESUBMITTER SOFT…	Lens Retention	Not_Resolved
https://www.accessdata.fda.gov/scripts/cdrh/cfdocs/cfMAUDE/Detail.CFM?MDRFOI__ID=8129041&pc=QCB	2023826-2018-01773	2018-11-09	Injury	STAAR SURGICAL COMPANY	2018-12-04	QCB	IMPLANTABLE COLLAMER LENS (ICL)	Inadequacy of Device Shape and/or Size	Corneal Edema; Intraocular Pressure Increased; Blurred Vision; No Code Available	P030016	NA	1	Event Description: THE REPORTER INDICATED THAT THE SURGEON IMPLANTED A 13.2MM TMICL13.2 LENS, -12.5/+2.0/072 (SPHERE/CYLINDER/AXIS) INTO THE PATIENT'S LEFT (OS) EYE ON (B)(6) 2018. REPORTEDLY, THE PATIENT PRESENTED WITH BLURRY VISION, CORNEAL EDEMA, HIGH IOP AND EXCESSIVE VAULT. THE SURGEON PERFORMED A YAG PI AND PATIENT WAS PLACED ON IOP MEDICATIONS. CURRENTLY, THE PATIENT'S SYMPTOMS ARE RESOLVI…	Lens Retention + Secondary Operation	Resolved
https://www.accessdata.fda.gov/scripts/cdrh/cfdocs/cfMAUDE/Detail.CFM?MDRFOI__ID=9709011&pc=QCB	2023826-2020-00272	2019-12-17	Injury	STAAR SURGICAL COMPANY	2020-02-13	QCB	IMPLANTABLE COLLAMER LENS (ICL)	Misfocusing	Corneal Edema; Intraocular Pressure Increased; Blurred Vision; No Code Available	NA	NA	1	Event Description: THE REPORTER INDICATED THE SURGEON IMPLANTED A 13.2MM VTICM5_13.2 IMPLANTABLE COLLAMER LENS, -6.00/+1.0/079 (SPHERE/CYLINDER/AXIS), IN THE PATIENTS RIGHT EYE (OD), ON (B)(6) 2019. THE PATIENT EXPERIENCED A REFRACTIVE SURPRISE. POST-OP, THERE WAS CORNEAL EDEMA AND THE INTRAOCULAR PRESSURE (IOP) INCREASED, WHICH WAS MANAGED WITH WOUND BURPING, PO DIAMOX, PREDNEFRINE FORTE AND TOP…	Lens Retention	Unknown
https://www.accessdata.fda.gov/scripts/cdrh/cfdocs/cfMAUDE/Detail.CFM?MDRFOI__ID=10930510&pc=QCB	2023826-2020-02837	2020-10-20 04:00:00	Injury	STAAR SURGICAL COMPANY	2020-12-01 05:00:00	QCB	IMPLANTABLE COLLAMER LENS (ICL)	Inadequacy of Device Shape and/or Size; Patient-Device Incompatibility	Corneal Edema; Intraocular Pressure Increased; Eye Pain; Appropriate Clinical Signs, Symptoms, Conditions Term / Code Not Available	NA	NA	1	Event Description: THE REPORTER INDICATED THAT THE SURGEON IMPLANTED A 13.2MM VTICMO13.2 IMPLANTABLE COLLAMER LENS, -16.5/+2.5/093 (SPHERE/CYLINDER/AXIS), INTO THE PATIENT'S RIGHT EYE (OD). THE SURGEON REPORTS THAT IMMEDIATELY POSTOP THERE WAS ELEVATED IOP, PAIN, CORNEAL EDEMA, AND A VAULT OF 1200. DIAMOX WAS ADMINISTERED. DAY 21 POSTOP THE VAULT IS 1000, THE PUPIL DOESN'T TIGHTEN WELL, NO PAIN O…	Lens Exchange	Resolved
https://www.accessdata.fda.gov/scripts/cdrh/cfdocs/cfMAUDE/Detail.CFM?MDRFOI__ID=9120422&pc=QCB	2023826-2019-01744	2012-11-29 05:00:00	Injury	STAAR SURGICAL COMPANY	2019-09-25 04:00:00	QCB	IMPLANTABLE COLLAMER LENS (ICL)	Off-Label Use; Inadequacy of Device Shape and/or Size	Corneal Edema; Intraocular Pressure Increased; No Code Available	N/A	NA	1	Event Description: THE REPORTER INDICATED THE SURGEON IMPLANTED A 13.2MM VTICM13.2 IMPLANTABLE COLLAMER LENS, -2.5/+0.5/069 (SPHERE/CYLINDER/AXIS) INTO THE PATIENT'S LEFT EYE (OS) ON (B)(6) 2012. THE SURGEON REPORTS EXCESSIVE VAULT, ELEVATED IOP, ANGLE CLOSURE, AND CORNEAL EDEMA. AN ENLARGEMENT OF THE PI-YAG WAS PERFORMED. THE PROBLEM IS RESOLVED. REPORTEDLY, THE LENS REMAINS IMPLANTED. THE CAUSE…	Lens Retention + Secondary Operation	Resolved
https://www.accessdata.fda.gov/scripts/cdrh/cfdocs/cfMAUDE/Detail.CFM?MDRFOI__ID=9120423&pc=QCB	2023826-2019-01743	2013-01-28 05:00:00	Injury	STAAR SURGICAL COMPANY	2019-09-25 04:00:00	QCB	IMPLANTABLE COLLAMER LENS (ICL)	Off-Label Use; Inadequacy of Device Shape and/or Size	Corneal Edema; Intraocular Pressure Increased; No Code Available	N/A	NA	1	Event Description: THE REPORTER INDICATED THE SURGEON IMPLANTED A 13.2MM VTICM13.2 IMPLANTABLE COLLAMER LENS, -1.0/+1.0/142 (SPHERE/CYLINDER/AXIS) INTO THE PATIENT'S RIGHT EYE (OD) ON (B)(6) 2013. THE SURGEON REPORTS EXCESSIVE VAULT, ELEVATED IOP, ANGLE CLOSURE, AND CORNEAL EDEMA. AN ENLARGEMENT OF THE PI-YAG WAS PERFORMED. THE PROBLEM IS RESOLVED. REPORTEDLY, THE LENS REMAINS IMPLANTED. THE CAUS…	Lens Retention + Secondary Operation	Resolved
https://www.accessdata.fda.gov/scripts/cdrh/cfdocs/cfMAUDE/Detail.CFM?MDRFOI__ID=8780421&pc=QCB	2023826-2019-01173	2019-04-12 04:00:00	Injury	STAAR SURGICAL COMPANY	2019-07-11 04:00:00	QCB	IMPLANTABLE COLLAMER LENS (ICL)	Misfocusing; Patient-Device Incompatibility	Corneal Edema; Intraocular Pressure Increased; Pain; Blurred Vision; Visual Disturbances	N/A	NA	1	Event Description: THE REPORTER INDICATED THAT A 13.2MM, VTICMO13.2, -18.00/4.5/101 (SPHERE/CYLINDER/AXIS), IMPLANTABLE COLLAMER LENS WAS IMPLANTED INTO THE PATIENT'S RIGHT EYE (OD) ON (B)(6) 2019. LOSS OF BCVA (PRE-OP BCVA = 20/80 POST-OP BCVA = 20/500) AND ELEVATED IOP (40 MMHG) WITHOUT PUPIL BLOCK AND ANGLE CLOSURE WERE OBSERVED ON (B)(6) 2019. LENS WAS REMOVED ON (B)(6) 2019. PER REPORTER, PA…	Lens Extraction + Secondary Operation	Resolved
https://www.accessdata.fda.gov/scripts/cdrh/cfdocs/cfMAUDE/Detail.CFM?MDRFOI__ID=13546404&pc=QCB	2023826-2022-00529	2022-01-25 05:00:00	Injury	STAAR SURGICAL COMPANY	2022-02-16 05:00:00	QCB	IMPLANTABLE COLLAMER LENS (ICL)	Adverse Event Without Identified Device or Use Problem	Corneal Edema; Intraocular Pressure Increased; Pupillary Block; Appropriate Clinical Signs, Symptoms, Conditions Term / Code Not Available	NA	NA	1	Event Description: THE REPORTER INDICATED THAT THE SURGEON IMPLANTED A 13.2MM TMICL13.2; -8.00/+1.00/072 (SPHERE/CYLINDER/AXIS) IMPLANTABLE COLLAMER LENS INTO THE PATIENT'S RIGHT EYE (OD) ON (B)(6) 2022. THERE WAS REPORT OF PUPIL BLOCK AND ELEVATED INTRAOCULAR PRESSURE; ON (B)(6) 2022 IT WAS ALSO NOTED PATIENT EXPERIENCED MID DILATED PUPIL; UNCORRECTED VISUAL ACUITY; CORNEAL EDEMA AND A YAG PI SU…	Lens Retention + Secondary Operation	Resolved
https://www.accessdata.fda.gov/scripts/cdrh/cfdocs/cfMAUDE/Detail.CFM?MDRFOI__ID=11334355&pc=QCB	2023826-2021-00359	2021-01-18 05:00:00	Injury	STAAR SURGICAL COMPANY	2021-02-16 05:00:00	QCB	IMPLANTABLE COLLAMER LENS (ICL)	Adverse Event Without Identified Device or Use Problem	Corneal Edema; Intraocular Pressure Increased; Visual Disturbances; Appropriate Clinical Signs, Symptoms, Conditions Term / Code Not Available	P030016	NA	1	Event Description: THE REPORTER INDICATED THE SURGEON IMPLANTED A 13.7MM TMICL13.7 IMPLANTABLE COLLAMER LENS, -10.00/+1.0/088 (SPHERE/CYLINDER/AXIS), IN THE PATIENTS LEFT EYE (OS) ON (B)(6) 2021. THE LENS WAS EXPLANTED ON (B)(6) 2021 DUE TO ANGLE CLOSURE WITH ELEVATED INTRAOCULAR PRESSURE. ANOTHER LENS WAS NOT IMPLANTED. CAUSE OF THE EVENT WAS DUE TO THE DEVICE. POST-OP MILD CORNEAL EDEMA. THE LE…	Lens Extraction	Unknown
https://www.accessdata.fda.gov/scripts/cdrh/cfdocs/cfMAUDE/Detail.CFM?MDRFOI__ID=9498160&pc=QCB	2023826-2019-02408	2019-08-15 04:00:00	Injury	STAAR SURGICAL COMPANY	2019-12-19 05:00:00	QCB	IMPLANTABLE COLLAMER LENS (ICL)	Inadequacy of Device Shape and/or Size	Corneal Edema; Pain; No Code Available	NA	NA	1	Event Description: THE REPORTER INDICATED THE SURGEON IMPLANTED A 13.7MM VTICM5_13.7 IMPLANTABLE COLLAMER LENS, -8.50/+3.5/065 (SPHERE/CYLINDER/AXIS) IN THE PATIENTS LEFT EYE (OS) ON (B)(6) 2019. THE LENS WAS EXPLANTED ON (B)(6) 2019 DUE TO EXCESSIVE VAULTING AND THE PATIENT FELT PAIN. THE INCISION WAS ENLARGED TO REMOVE THE LENS. THE LENS WAS NOT EXCHANGED FOR ANOTHER LENS. THE CAUSE OF THE EVEN…	Lens Extraction	Unknown
https://www.accessdata.fda.gov/scripts/cdrh/cfdocs/cfMAUDE/Detail.CFM?MDRFOI__ID=8860009&pc=QCB	2023826-2019-01291	2019-04-08 04:00:00	Injury	STAAR SURGICAL COMPANY	2019-08-05 04:00:00	QCB	IMPLANTABLE COLLAMER LENS (ICL)	Misfocusing; Inadequacy of Device Shape and/or Size; Optical Problem	Corneal Edema; Pain; Red Eye(s); Blurred Vision; No Code Available	N/A	NA	1	Event Description: THE REPORTER INDICATED THAT A 12.6MM, VTICM5_12.6, -3.00/3.5/007 (SPHERE/CYLINDER/AXIS), IMPLANTABLE COLLAMER LENS WAS IMPLANTED INTO THE PATIENT'S LEFT EYE (OS) ON (B)(6) 2019. BLURRED VISION, "PAINFUL, AND RED EYE" WAS OBSERVED. LENS WAS REMOVED ON (B)(6) 2019. CAUSE OF THE EVENT IS REPORTED AS "THE SIZES OF THE LENS PROBABLY TOO BIG." PER PATIENTS LAST VISIT ON (B)(6) 2019, …	Lens Extraction	Unknown
https://www.accessdata.fda.gov/scripts/cdrh/cfdocs/cfMAUDE/Detail.CFM?MDRFOI__ID=9350551&pc=QCB	2023826-2019-02189	2019-10-23 04:00:00	Injury	STAAR SURGICAL COMPANY	2019-11-20 05:00:00	QCB	IMPLANTABLE COLLAMER LENS (ICL)	Misfocusing	Corneal Ulcer; Intraocular Pressure Increased; Pain; Blurred Vision; Visual Disturbances; No Code Available	NA	NA	1	Event Description: THE REPORTER INDICATED THE SURGEON IMPLANTED A 13.2MM VTICM5_13.2 IMPLANTABLE COLLAMER LENS, -12.00/+1.5/081 (SPHERE/CYLINDER/AXIS), IN THE PATIENTS LEFT EYE (OS) ON (B)(6) 2019. THE INTRAOCULAR PRESSURE WAS REPORTED AS BEING HIGH. THE PATIENT COMPLAINED OF POOR VISION AND SEES DISTORTED LIGHTS. THE LENS REMAINS IMPLANTED. ADDITIONAL INFORMATION HAS BEEN REQUESTED BUT NONE HAS …	Lens Retention	Unknown
https://www.accessdata.fda.gov/scripts/cdrh/cfdocs/cfMAUDE/Detail.CFM?MDRFOI__ID=13983283&pc=QCB	2023826-2022-01033	2022-02-23 05:00:00	Injury	STAAR SURGICAL COMPANY	2022-04-01 04:00:00	QCB	IMPLANTABLE COLLAMER LENS (ICL)	Misfocusing; Inadequacy of Device Shape and/or Size	Dry Eye(s); Inflammation; Intraocular Pressure Increased; Blurred Vision; Discomfort; Eye Pain; Appropriate Clinical Signs, Symptoms, Conditions Term / Code Not Available	N/A	NA	1	Event Description: THE REPORTER INDICATED THAT A 12.6MM VTICM5_12.6, -12.5/+2.0/102 (SPHERE/CYLINDER/AXIS) IMPLANTABLE COLLAMER LENS WAS IMPLANTED INTO THE PATIENT'S LEFT EYE (OS) ON (B)(6) 2022. THE SURGEON REPORTS LOW VAULT, ELEVATED IOP, PIGMENT DISPERSION, AC INFLAMMATION CELLS +, SPK, HEAVINESS AND EYE DISCOMFORT, PHOTOPHOBIA, EYE PAIN, UNABLE TO OPEN EYE, DRY EYE. REPORTEDLY MEDICATION WAS …	Lens Retention	Unknown
https://www.accessdata.fda.gov/scripts/cdrh/cfdocs/cfMAUDE/Detail.CFM?MDRFOI__ID=13983288&pc=QCB	2023826-2022-01032	2022-02-23 05:00:00	Injury	STAAR SURGICAL COMPANY	2022-04-01 04:00:00	QCB	IMPLANTABLE COLLAMER LENS (ICL)	Misfocusing; Inadequacy of Device Shape and/or Size	Dry Eye(s); Inflammation; Intraocular Pressure Increased; Blurred Vision; Discomfort; Eye Pain; Appropriate Clinical Signs, Symptoms, Conditions Term / Code Not Available	N/A	NA	1	Event Description: THE REPORTER INDICATED THAT A 12.6MM VTICM5_12.6, -10.5/+1.0/055 (SPHERE/CYLINDER/AXIS) IMPLANTABLE COLLAMER LENS WAS IMPLANTED INTO THE PATIENT'S RIGHT EYE (OD) ON (B)(6) 2022. THE SURGEON REPORTS LOW VAULT, ELEVATED IOP, PIGMENT DISPERSION, AC INFLAMMATION CELLS +, SPK, HEAVINESS AND EYE DISCOMFORT, PHOTOPHOBIA, EYE PAIN, UNABLE TO OPEN EYE, DRY EYE. REPORTEDLY MEDICATION WAS…	Lens Retention	Unknown
https://www.accessdata.fda.gov/scripts/cdrh/cfdocs/cfMAUDE/Detail.CFM?MDRFOI__ID=18136571&pc=QCB	2023826-2023-04906	2023-10-19 04:00:00	Injury	STAAR SURGICAL COMPANY	2023-11-14 05:00:00	QCB	IMPLANTABLE COLLAMER LENS (ICL)	Adverse Event Without Identified Device or Use Problem	Endophthalmitis; Hypopyon; Inflammation; Intraocular Pressure Increased; Pain; Appropriate Clinical Signs, Symptoms, Conditions Term / Code Not Available	P030016	NA	1	Event Description: THE REPORTER INDICATED THE SURGEON IMPLANTED A 12.6MM VTICM5_12.6 IMPLANTABLE COLLAMER LENS, -11.00/+2.0/090 (SPHERE/CYLINDER/AXIS), INTO THE PATIENTS LEFT EYE (OS) ON (B)(6) 2023. THE PATIENT WAS FOUND TO HAVE ENDOPHTHALMITIS AND PERMANENT LOSS OF BCVA. INTRAOCULAR PRESSURE (IOP) CHECK AND ANTERIOR SEGMENT IMAGING WERE PERFORMED ON (B)(6) 2023. PATIENT WAS PRESCRIBED MEDICATIO…	Lens Retention + Secondary Operation	Resolved
https://www.accessdata.fda.gov/scripts/cdrh/cfdocs/cfMAUDE/Detail.CFM?MDRFOI__ID=18136578&pc=QCB	2023826-2023-04905	2023-10-19 04:00:00	Injury	STAAR SURGICAL COMPANY	2023-11-14 05:00:00	QCB	IMPLANTABLE COLLAMER LENS (ICL)	Adverse Event Without Identified Device or Use Problem	Endophthalmitis; Hypopyon; Inflammation; Intraocular Pressure Increased; Pain; Appropriate Clinical Signs, Symptoms, Conditions Term / Code Not Available	P030016	NA	1	Event Description: THE REPORTER INDICATED THE SURGEON IMPLANTED A 12.6MM VTICM5_12.6 IMPLANTABLE COLLAMER LENS, -11.50/+2.0/091 (SPHERE/CYLINDER/AXIS), INTO THE PATIENTS RIGHT EYE (OD) ON (B)(6) 2023. THE PATIENT WAS FOUND TO HAVE ENDOPHTHALMITIS AND PERMANENT LOSS OF BCVA. INTRAOCULAR PRESSURE (IOP) CHECK AND ANTERIOR SEGMENT IMAGING WERE PERFORMED ON (B)(6) 2023. PATIENT WAS PRESCRIBED MEDICATI…	Lens Retention + Secondary Operation	Resolved
https://www.accessdata.fda.gov/scripts/cdrh/cfdocs/cfMAUDE/Detail.CFM?MDRFOI__ID=10980501&pc=QCB	2023826-2020-02926	2020-11-03 05:00:00	Injury	STAAR SURGICAL COMPANY	2020-12-09 05:00:00	QCB	IMPLANTABLE COLLAMER LENS (ICL)	Inadequacy of Device Shape and/or Size	Eye Pain; Appropriate Clinical Signs, Symptoms, Conditions Term / Code Not Available	NA	NA	1	Event Description: THE REPORTER INDICATED THAT THE SURGEON IMPLANTED A 13.2MM VTICM5_13.2 IMPLANTABLE COLLAMER LENS, -12.5/+1.0/082 (SPHERE/CYLINDER/AXIS), INTO THE PATIENT'S LEFT EYE (OS) ON (B)(6) 2020. THE SURGEON REPORTS EXCESSIVE VAULT, SIGNIFICANT REDUCTION OF IRIDO-CORNEAL ANGLES (ICA), PAIN, PHOTOPHOBIA, AND FIXED PUPIL. REPORTEDLY, THE LENS REMAINS IMPLANTED. Manufacturer Narrative: B5-U…	Lens Exchange	Resolved
https://www.accessdata.fda.gov/scripts/cdrh/cfdocs/cfMAUDE/Detail.CFM?MDRFOI__ID=15136765&pc=QCB	2023826-2022-02524	2022-01-27 05:00:00	Injury	STAAR SURGICAL COMPANY	2022-07-30 04:00:00	QCB	IMPLANTABLE COLLAMER LENS (ICL)	No Apparent Adverse Event	Eye Pain; Appropriate Clinical Signs, Symptoms, Conditions Term / Code Not Available	P030016	NA	1	Event Description: THE REPORTER INDICATED THAT A 12.6MM TMICL 12.6 IMPLANTABLE COLLAMER LENS OF -12.5/1.0/091 (SPHERE/CYLINDER/AXIS) WAS IMPLANTED INTO THE PATIENTS LEFT EYE (OS) ON (B)(6) 2021. INTERMITTENT EYE PAIN IS REPORTED. THE LENS REMAINS IMPLANTED. THE REPORTER STATES CAUSE WAS DUE TO THE DEVICE. CAUSE DETAILS PROVIDED BY THE REPORTER DESCRIBE MULTIPLE PATIENT RELATED FACTORS THAT POTENT…	Lens Exchange	Resolved
https://www.accessdata.fda.gov/scripts/cdrh/cfdocs/cfMAUDE/Detail.CFM?MDRFOI__ID=16942788&pc=QCB	2023826-2023-01890	2022-12-26 05:00:00	Injury	STAAR SURGICAL COMPANY	2023-05-16 04:00:00	QCB	IMPLANTABLE COLLAMER LENS (ICL)	Adverse Event Without Identified Device or Use Problem	Eye Pain; Appropriate Clinical Signs, Symptoms, Conditions Term / Code Not Available	P030016	NA	1	Event Description: THE REPORTER INDICATED THAT THE SURGEON IMPLANTED A 12.6MM VTICMO12.6; -10.0/1.5/011 (SPHERE/CYLINDER/AXIS) IMPLANTABLE COLLAMER LENS INTO THE PATIENT'S RIGHT EYE (OD) ON (B)(6) 2022. THE PATIENT COMPLAINT OF PAIN AROUND THE EYE AND THE SURGEON NOTES THE PATIENT HAD MUSCAE VOLITANTES (EYE FLOATERS). THE LENS WAS EXPLANTED ON (B)(6) 2023 AND THE PROBLEM WAS RESOLVED. THE CAUSE O…	Lens Extraction	Resolved
https://www.accessdata.fda.gov/scripts/cdrh/cfdocs/cfMAUDE/Detail.CFM?MDRFOI__ID=18387537&pc=QCB	2023826-2023-05730	2023-11-01 04:00:00	Injury	STAAR SURGICAL COMPANY	2023-12-22 05:00:00	QCB	IMPLANTABLE COLLAMER LENS (ICL)	Off-Label Use; Adverse Event Without Identified Device or Use Problem	Eye Pain; No Clinical Signs, Symptoms or Conditions	P030016	NA	1	Event Description: THE REPORTER INDICATED THE SURGEON IMPLANTED A 12.6MM VTICMO12.6 IMPLANTABLE COLLAMER LENS, -14.50/+2.0/115 (SPHERE/CYLINDER/AXIS), IN THE PATIENTS RIGHT EYE (OD), ON (B)(6) 2023. THE LENS WAS EXPLANTED ON (B)(6) 2023 DUE TO PATIENT WAS EXPERIENCING ORBITAL PAIN DUE TO PSYCHOLOGICAL EFFECTS AND THE PROBLEM WAS RESOLVED. ADDITIONAL INFORMATION HAS BEEN REQUESTED BUT NONE HAS BEE…	Lens Extraction	Resolved
https://www.accessdata.fda.gov/scripts/cdrh/cfdocs/cfMAUDE/Detail.CFM?MDRFOI__ID=18389058&pc=QCB	2023826-2023-05729	2023-10-31 04:00:00	Injury	STAAR SURGICAL COMPANY	2023-12-22 05:00:00	QCB	IMPLANTABLE COLLAMER LENS (ICL)	Off-Label Use; Adverse Event Without Identified Device or Use Problem	Eye Pain; No Clinical Signs, Symptoms or Conditions	P030016	NA	1	Event Description: THE REPORTER INDICATED THE SURGEON IMPLANTED A 12.6MM VTICMO12.6 IMPLANTABLE COLLAMER LENS, -15.50/+1.5/067 (SPHERE/CYLINDER/AXIS), IN THE PATIENTS LEFT EYE (OS), ON (B)(6) 2023. THE LENS WAS EXPLANTED ON (B)(6) 2023 DUE TO PATIENT WAS EXPERIENCING ORBITAL PAIN DUE TO PSYCHOLOGICAL EFFECTS AND THE PROBLEM WAS RESOLVED. ADDITIONAL INFORMATION HAS BEEN REQUESTED BUT NONE HAS BEEN…	Lens Extraction	Resolved
https://www.accessdata.fda.gov/scripts/cdrh/cfdocs/cfMAUDE/Detail.CFM?MDRFOI__ID=11778992&pc=QCB	2023826-2021-01327	2021-02-23	Injury	STAAR SURGICAL COMPANY	2021-05-05	QCB	IMPLANTABLE COLLAMER LENS (ICL)	Adverse Event Without Identified Device or Use Problem	Eye Pain; Swelling/ Edema	N/A	NA	1	Event Description: HE REPORTER INDICATED THAT A 12.6MM, VTICMO12.6, -15.00/1.5/089 (SPHERE/CYLINDER/AXIS), IMPLANTABLE COLLAMER LENS WAS IMPLANTED INTO THE PATIENT'S RIGHT EYE (OD) ON (B)(6) 2020. ON (B)(6) 2021 THE LENS WAS EXPLANTED DUE TO THE SUSPENSORY LIGAMENT OF THE EYE LENS THAT WAS FOUND TO BE RELAXED, AND PATIENT REPORTED SEVERE EYE PAIN, SWELLING AND DISTENSION. THIS RESOLVED THE PROBLE…	Lens Extraction	Resolved
https://www.accessdata.fda.gov/scripts/cdrh/cfdocs/cfMAUDE/Detail.CFM?MDRFOI__ID=11779023&pc=QCB	2023826-2021-01328	2021-02-23	Injury	STAAR SURGICAL COMPANY	2021-05-05	QCB	IMPLANTABLE COLLAMER LENS (ICL)	Adverse Event Without Identified Device or Use Problem	Eye Pain; Swelling/ Edema	N/A	NA	1	Event Description: THE REPORTER INDICATED THAT THE SURGEON IMPLANTED A 12.6MM VTICMO12.6, -13.50/2.0/091 (SPHERE/CYLINDER/AXIS), IMPLANTABLE COLLAMER LENS INTO THE PATIENT'S LEFT EYE (OS) ON (B)(6)2020. SEVERE EYE PAIN, SWELLING AND DISTENSION WAS OBSERVED. ON (B)(6) 2021 THE LENS WAS EXPLANTED. THIS RESOLVED THE PROBLEM. REPORTEDLY, "DURING THE OPERATION, THE SUSPENSORY LIGAMENT OF THE LENS WAS …	Lens Extraction	Resolved
https://www.accessdata.fda.gov/scripts/cdrh/cfdocs/cfMAUDE/Detail.CFM?MDRFOI__ID=16622823&pc=QCB	2023826-2023-01088	2023-02-28 05:00:00	Injury	STAAR SURGICAL COMPANY	2023-03-27 04:00:00	QCB	IMPLANTABLE COLLAMER LENS (ICL)	Adverse Event Without Identified Device or Use Problem	Fatigue; Headache; Appropriate Clinical Signs, Symptoms, Conditions Term / Code Not Available	P030016	NA	1	Event Description: THE REPORTER INDICATED THAT THE SURGEON IMPLANTED A 12.6MM VTICM5_12.6; -6.5/2.5/102 (SPHERE/CYLINDER/AXIS) IMPLANTABLE COLLAMER LENS INTO THE PATIENT'S LEFT EYE (OS) ON (B)(6) 2023. THE SURGEON REPORTS THE PATIENT IS HYPEROPIC AND SHOWING RESIDUAL CYL; HAS HEADACHES AND FATIGUE; STEROIDS WERE PRESCRIBED. LENS REMAINS IMPLANTED. IF ADDITIONAL INFORMATION IS RECEIVED A SUPPLEMEN…	Lens Exchange	Unknown
https://www.accessdata.fda.gov/scripts/cdrh/cfdocs/cfMAUDE/Detail.CFM?MDRFOI__ID=17715562&pc=QCB	2023826-2023-03867	2023-07-24 04:00:00	Injury	STAAR SURGICAL COMPANY	2023-09-08 04:00:00	QCB	IMPLANTABLE COLLAMER LENS (ICL)	Optical Problem	Fatigue; Nausea; Visual Disturbances; Dizziness; Halo; Eye Pain	P030016	NA	1	Event Description: THE REPORTER INDICATED THE SURGEON IMPLANTED A 12.6MM VTICMO12.6 IMPLANTABLE COLLAMER LENS, -14.50/+3.0/107 (SPHERE/CYLINDER/AXIS), IN THE PATIENTS RIGHT EYE (OD), ON (B)(6) 2023. THE LENS WAS EXPLANTED ON (B)(6) 2023 DUE TO PATIENT COMPLAINED OF GLARE/HALOES, DIZZINESS, NAUSEA, EYE FATIGUE AND PAIN. THE PROBLEM WAS RESOLVED. THE INTRAOCULAR PRESSURE WAS NORMAL AND GOOD NEAR AN…	Lens Extraction	Resolved
https://www.accessdata.fda.gov/scripts/cdrh/cfdocs/cfMAUDE/Detail.CFM?MDRFOI__ID=17715631&pc=QCB	2023826-2023-03868	2023-07-24 04:00:00	Injury	STAAR SURGICAL COMPANY	2023-09-08 04:00:00	QCB	IMPLANTABLE COLLAMER LENS (ICL)	Optical Problem	Fatigue; Nausea; Visual Disturbances; Dizziness; Halo; Eye Pain	P030016	NA	1	Event Description: THE REPORTER INDICATED THE SURGEON IMPLANTED A 12.6MM VTICMO12.6 IMPLANTABLE COLLAMER LENS, -12.00/+3.5/090 (SPHERE/CYLINDER/AXIS), IN THE PATIENTS LEFT EYE (OS), ON (B)(6) 2023. THE LENS WAS EXPLANTED ON (B)(6) 2023 DUE TO PATIENT COMPLAINED OF GLARE/HALOES, DIZZINESS, NAUSEA, EYE FATIGUE AND PAIN. THE PROBLEM WAS RESOLVED. THE INTRAOCULAR PRESSURE WAS NORMAL AND GOOD NEAR AND…	Lens Extraction	Resolved
https://www.accessdata.fda.gov/scripts/cdrh/cfdocs/cfMAUDE/Detail.CFM?MDRFOI__ID=10868572&pc=QCB	2023826-2020-02721	2020-06-12 04:00:00	Injury	STAAR SURGICAL COMPANY	2020-11-19 05:00:00	QCB	IMPLANTABLE COLLAMER LENS (ICL)	Inadequacy of Device Shape and/or Size	Glaucoma	NA	NA	1	Event Description: THE REPORTER INDICATED THAT A 13.2MM, VTICM5_13.2, -10.00/+2.50/81 (SPHERE/CYLINDER/AXIS), IMPLANTABLE COLLAMER LENS WAS IMPLANTED INTO THE PATIENTS LEFT EYE (OS) ON (B)(6) 2020. ON (B)(6) 2020 THE LENS WAS EXPLANTED DUE TO EXCESSIVE VAULT AND GLAUCOMA. IT WAS REPORTED THAT PATIENT'S CURRENT CONDITION IS GOOD AND GLAUCOMA WAS RESOLVED THROUGH MEDICATION. CAUSE OF EVENT IS UNKNO…	Lens Extraction	Resolved
https://www.accessdata.fda.gov/scripts/cdrh/cfdocs/cfMAUDE/Detail.CFM?MDRFOI__ID=10868645&pc=QCB	2023826-2020-02720	2020-06-12 04:00:00	Injury	STAAR SURGICAL COMPANY	2020-11-19 05:00:00	QCB	IMPLANTABLE COLLAMER LENS (ICL)	Inadequacy of Device Shape and/or Size	Glaucoma	NA	NA	1	Event Description: THE REPORTER INDICATED THAT A 13.2MM, VTICM5_13.2, -10.00/+2.50/92 (SPHERE/CYLINDER/AXIS), IMPLANTABLE COLLAMER LENS WAS IMPLANTED INTO THE PATIENTS RIGHT EYE (OD) ON (B)(6) 2020. ON (B)(6) 2020 THE LENS WAS EXPLANTED DUE TO EXCESSIVE VAULT AND GLAUCOMA. IT WAS REPORTED THAT PATIENT'S CURRENT CONDITION IS GOOD AND GLAUCOMA WAS RESOLVED THROUGH MEDICATION. CAUSE OF EVENT IS UNKN…	Lens Extraction	Resolved
https://www.accessdata.fda.gov/scripts/cdrh/cfdocs/cfMAUDE/Detail.CFM?MDRFOI__ID=11453104&pc=QCB	2023826-2021-00590	2021-02-15 05:00:00	Injury	STAAR SURGICAL COMPANY	2021-03-10 05:00:00	QCB	IMPLANTABLE COLLAMER LENS (ICL)	Adverse Event Without Identified Device or Use Problem	Glaucoma; Appropriate Clinical Signs, Symptoms, Conditions Term / Code Not Available	P030016	NA	1	Event Description: THE REPORTER INDICATED THAT A 13.2MM, TMICL13.2, -4.50/1.5/089 (SPHERE/CYLINDER/AXIS), IMPLANTABLE COLLAMER LENS WAS EXPLANTED FROM THE PATIENT'S EYE DUE TO CLOSED ANGLE GLAUCOMA BEING OBSERVED. NO PATIENT INJURY. ADDITIONAL SUTURE TO CLOSE THE WOUND. ADDITIONAL INFORMATION HAS BEEN REQUESTED BUT NONE HAS BEEN FORTHCOMING. IF ADDITIONAL INFORMATION IS RECEIVED A SUPPLEMENTAL ME…	Lens Extraction	Unknown
https://www.accessdata.fda.gov/scripts/cdrh/cfdocs/cfMAUDE/Detail.CFM?MDRFOI__ID=16142126&pc=QCB	2023826-2023-00099	2022-12-12 05:00:00	Injury	STAAR SURGICAL COMPANY	2023-01-11 05:00:00	QCB	IMPLANTABLE COLLAMER LENS (ICL)	No Apparent Adverse Event	Glaucoma; Appropriate Clinical Signs, Symptoms, Conditions Term / Code Not Available	P030016	NA	1	Event Description: THE REPORTER INDICATED THE SURGEON IMPLANTED A 12.1MM VTICMO12.1 IMPLANTABLE COLLAMER LENS, -14.50/+1.5/091 (SPHERE/CYLINDER/AXIS), INTO THE PATIENTS RIGHT EYE (OD) ON (B)(6) 2022. POST-OP, THERE WAS REMAINING PUPIL DISSIPATION AFTER AN ACUTE GLAUCOMA ATTACK. THE LENS REMAINED IMPLANTED. THIS WAS THE REPLACEMENT LENS FOR MFR. REPORT # 2023826-2023-00098. ADDITIONAL INFORMATION …	Lens Exchange	Unknown
https://www.accessdata.fda.gov/scripts/cdrh/cfdocs/cfMAUDE/Detail.CFM?MDRFOI__ID=16766002&pc=QCB	2023826-2023-01455	2023-04-03 04:00:00	Injury	STAAR SURGICAL COMPANY	2023-04-18 04:00:00	QCB	IMPLANTABLE COLLAMER LENS (ICL)	Adverse Event Without Identified Device or Use Problem	Glaucoma; Appropriate Clinical Signs, Symptoms, Conditions Term / Code Not Available	P030016	NA	1	Event Description: THE REPORTER INDICATED THAT THE SURGEON IMPLANTED A 12.1MM VTICM5_12.1; -10.00+1.50/103 (SPHERE/CYLINDER/AXIS) IMPLANTABLE COLLAMER LENS INTO THE PATIENT'S RIGHT EYE (OD) ON (B)(6) 2023. THE PATIENT EXPERIENCED PIGMENT DISPERSION; GLAUCOMA AND ON (B)(6) 2023 THE LENS WAS EXPLANTED. IT WAS ADDITIONALLY NOTED THE PATIENT IS ON ANTI-GLAUCOMA DROPS FOR NOW. THE PROBLEM WAS RESOLVED…	Lens Extraction	Resolved
https://www.accessdata.fda.gov/scripts/cdrh/cfdocs/cfMAUDE/Detail.CFM?MDRFOI__ID=16773437&pc=QCB	2023826-2023-01461	2023-04-03 04:00:00	Injury	STAAR SURGICAL COMPANY	2023-04-19 04:00:00	QCB	IMPLANTABLE COLLAMER LENS (ICL)	Adverse Event Without Identified Device or Use Problem	Glaucoma; Appropriate Clinical Signs, Symptoms, Conditions Term / Code Not Available	P030016	NA	1	Event Description: THE REPORTER INDICATED THAT THE SURGEON IMPLANTED A 12.1MM VTICM5_12.1; -12.00/+1.50/105 (SPHERE/CYLINDER/AXIS) IMPLANTABLE COLLAMER LENS INTO THE PATIENT'S LEFT EYE (OS) ON (B)(6) 2023. THE PATIENT EXPERIENCED PIGMENT DISPERSION; GLAUCOMA AND ON (B)(6) 2023 THE LENS WAS EXPLANTED. IT WAS ADDITIONALLY NOTED THE PATIENT IS ON ANTI-GLAUCOMA DROPS FOR NOW. THE PROBLEM WAS RESOLVED…	Lens Extraction	Resolved
https://www.accessdata.fda.gov/scripts/cdrh/cfdocs/cfMAUDE/Detail.CFM?MDRFOI__ID=16766109&pc=QCB	2023826-2023-01337	NA	Injury	STAAR SURGICAL COMPANY	2023-04-18 04:00:00	QCB	IMPLANTABLE COLLAMER LENS (ICL)	Misfocusing	Glaucoma; Headache; Intraocular Pressure Increased; Pupillary Block; Blurred Vision; Eye Pain; Appropriate Clinical Signs, Symptoms, Conditions Term / Code Not Available	P030016	NA	1	Event Description: THE REPORTER INDICATED THAT A 12.6MM VTICM512.6 IMPLANTABLE COLLAMER LENS OF -11.00/1.5/86 (SPHERE/CYLINDER/AXIS) WAS IMPLANTED INTO THE PATIENT'S LEFT EYE (OS) ON (B)(6) 2021. ON (B)(6)-2023, YAG WAS PERFORMED DUE TO TRANSIENT LOSS OF BCVA AND ELEVATED IOP. REPORTEDLY, "PATIENT HAD INTERMITTENT TRANSIENT VISION LOSS RESOLVED WITH LASER PI. HER LATEST IOP IS 12MMHG. POSSIBLE IN…	Lens Extraction + Secondary Operation	Unknown
https://www.accessdata.fda.gov/scripts/cdrh/cfdocs/cfMAUDE/Detail.CFM?MDRFOI__ID=15153715&pc=QCB	2023826-2022-02531	NA	Injury	STAAR SURGICAL COMPANY	2022-08-02 04:00:00	QCB	IMPLANTABLE COLLAMER LENS (ICL)	Adverse Event Without Identified Device or Use Problem; Unintended Movement	Glaucoma; Inflammation; Intraocular Pressure Increased; Blurred Vision; Appropriate Clinical Signs, Symptoms, Conditions Term / Code Not Available	NA	NA	1	Event Description: THE REPORTER INDICATED THE SURGEON IMPLANTED A 12.5MM TICM125V4 IMPLANTABLE COLLAMER LENS, -12.00/+6.0/005 (SPHERE/CYLINDER/AXIS), INTO THE PATIENTS LEFT EYE (OS) ON (B)(6) 2014. THE REPORTER INDICATED THERE WAS GRADUAL LOSS OF VISION AND DIAGNOSIS OF BLINDNESS ((B)(6) 2022). BLINDNESS DUE TO GLAUCOMA RESULTING FROM ICL IMPLANTATION. THE SPECIFIC ETIOLOGY IS UNKNOWN. THE GLAUCO…	Lens Retention	Unknown
https://www.accessdata.fda.gov/scripts/cdrh/cfdocs/cfMAUDE/Detail.CFM?MDRFOI__ID=15434301&pc=QCB	2023826-2022-03078	2022-08-30 04:00:00	Injury	STAAR SURGICAL COMPANY	2022-09-15 04:00:00	QCB	IMPLANTABLE COLLAMER LENS (ICL)	Misfocusing; Patient Device Interaction Problem	Glaucoma; Intraocular Pressure Increased; Blurred Vision; Eye Pain; Appropriate Clinical Signs, Symptoms, Conditions Term / Code Not Available	P030016	NA	1	Event Description: THE REPORTER INDICATED THAT A 13.2MM VTICM5 13.2 IMPLANTABLE COLLAMER LENS OF -11.50/2.0/090 (SPHERE/CYLINDER/AXIS) WAS IMPLANTED INTO THE PATIENT'S RIGHT EYE (OD) ON (B)(6) 2022. ON (B)(6) 2022 THE LENS WAS EXPLANTED DUE TO EYE PAIN; ANGLE CLOSURE WITH ELEVATED IOP AND BLURRED VISION. "PAIN IN RIGHT SIDE AFTER IMPLANTATION. PUSHING FORWARD ON IRIS. GLAUCOMA SUSPECT POSSIBLE." …	Lens Extraction	Resolved
https://www.accessdata.fda.gov/scripts/cdrh/cfdocs/cfMAUDE/Detail.CFM?MDRFOI__ID=15434626&pc=QCB	2023826-2022-03079	2022-08-23 04:00:00	Injury	STAAR SURGICAL COMPANY	2022-09-15 04:00:00	QCB	IMPLANTABLE COLLAMER LENS (ICL)	Optical Problem; Patient Device Interaction Problem	Glaucoma; Intraocular Pressure Increased; Blurred Vision; Halo; Eye Pain; Appropriate Clinical Signs, Symptoms, Conditions Term / Code Not Available	P030016	NA	1	Event Description: THE REPORTER INDICATED THAT A 13.2MM VTICM5 13.2 IMPLANTABLE COLLAMER LENS OF -14.50/1.0/090 (SPHERE/CYLINDER/AXIS) WAS IMPLANTED INTO THE PATIENT'S LEFT EYE (OS) ON (B)(6) 2022. ON (B)(6) 2022 THE LENS WAS EXPLANTED DUE TO EYE PAIN; ANGLE CLOSURE WITH ELEVATED IOP AND GLARE/HALOES. "PAIN IN LEFT SIDE AFTER IMPLANTATION. PUSHING FORWARD ON IRIS. GLAUCOMA SUSPECT POSSIBLE; PHOTO…	Lens Extraction	Resolved
https://www.accessdata.fda.gov/scripts/cdrh/cfdocs/cfMAUDE/Detail.CFM?MDRFOI__ID=9672545&pc=QCB	2023826-2020-00246	2019-11-11 05:00:00	Injury	STAAR SURGICAL COMPANY	2020-02-05 05:00:00	QCB	IMPLANTABLE COLLAMER LENS (ICL)	Adverse Event Without Identified Device or Use Problem	Glaucoma; Intraocular Pressure Increased; Pain; Vomiting; No Code Available	N/A	NA	1	Event Description: THE REPORTER INDICATED THAT A 12.1MM, VTICMO12.1, -18.0/+1.0/127 (SPHERE/CYLINDER/AXIS), IMPLANTABLE COLLAMER LENS WAS IMPLANTED INTO THE PATIENTS RIGHT EYE (OD) ON (B)(6) 2019. ON (B)(6) 2019 THE LENS WAS EXPLANTED DUE TO ANGLE CLOSURE WITH ELEVATED IOP. THE REPORTER STATED THAT THE PATIENT DEVELOPED DENSE AC FIBRINOUS INFLAMMATORY REACTION, SECONDARY GLAUCOMA AND RIGHT FROM I…	Lens Extraction	Resolved
https://www.accessdata.fda.gov/scripts/cdrh/cfdocs/cfMAUDE/Detail.CFM?MDRFOI__ID=9672785&pc=QCB	2023826-2020-00247	2019-11-11 05:00:00	Injury	STAAR SURGICAL COMPANY	2020-02-05 05:00:00	QCB	IMPLANTABLE COLLAMER LENS (ICL)	Adverse Event Without Identified Device or Use Problem	Glaucoma; Intraocular Pressure Increased; Pain; Vomiting; No Code Available	N/A	NA	1	Event Description: THE REPORTER INDICATED THAT A 12.1MM, VTICMO12.1, -18.0/+1.5/053 (SPHERE/CYLINDER/AXIS), IMPLANTABLE COLLAMER LENS WAS IMPLANTED INTO THE PATIENTS LEFT EYE (OS) ON (B)(6) 2019. ON (B)(6) 2019 THE LENS WAS EXPLANTED DUE TO ANGLE CLOSURE WITH ELEVATED IOP. THE REPORTER STATED THAT THE PATIENT DEVELOPED DENSE AC FIBRINOUS INFLAMMATORY REACTION, SECONDARY GLAUCOMA AND RIGHT FROM IM…	Lens Extraction	Resolved
https://www.accessdata.fda.gov/scripts/cdrh/cfdocs/cfMAUDE/Detail.CFM?MDRFOI__ID=9586880&pc=QCB	2023826-2020-00065	2019-12-08	Malfunction	STAAR SURGICAL COMPANY	2020-01-14	QCB	IMPLANTABLE COLLAMER LENS (ICL)	Misfocusing; Inadequacy of Device Shape and/or Size	Headache	N/A	NA	1	Event Description: THE REPORTER INDICATED THAT A 13.2MM, VTICMO13.2, -17.50/3.0/064 (SPHERE/CYLINDER/AXIS), IMPLANTABLE COLLAMER LENS WAS IMPLANTED INTO THE PATIENT'S LEFT EYE (OS) ON (B)(6) 2019. REFRACTIVE SURPRISE, EXCESSIVE VAULT, AND HEADACHE WERE OBSERVED. LENS REMAINS IMPLANTED. REPORTEDLY, "HEADACHE RELIEVED BY WEARING GLASSES PRESCRIBED." ADDITIONAL INFORMATION HAS BEEN REQUESTED BUT NON…	Lens Retention	Unknown
https://www.accessdata.fda.gov/scripts/cdrh/cfdocs/cfMAUDE/Detail.CFM?MDRFOI__ID=9586884&pc=QCB	2023826-2020-00064	2019-12-08	Malfunction	STAAR SURGICAL COMPANY	2020-01-14	QCB	IMPLANTABLE COLLAMER LENS (ICL)	Misfocusing; Inadequacy of Device Shape and/or Size	Headache	N/A	NA	1	Event Description: THE REPORTER INDICATED THAT A 13.2MM, VTICMO13.2, -16.00/3.5/101 (SPHERE/CYLINDER/AXIS), IMPLANTABLE COLLAMER LENS WAS IMPLANTED INTO THE PATIENT'S RIGHT EYE (OD) ON (B)(6) 2019. REFRACTIVE SURPRISE, EXCESSIVE VAULT WAS OBSERVED, WITH HEADACHE AND DIFFICULTY DRIVING. LENS REMAINS IMPLANTED. CAUSE OF THE EVENT IS REPORTED AS UNKNOWN._x000D_ REPORTEDLY, "FIRST CASE TO DEVELOP HYP…	Lens Retention	Unknown
https://www.accessdata.fda.gov/scripts/cdrh/cfdocs/cfMAUDE/Detail.CFM?MDRFOI__ID=17039558&pc=QCB	2023826-2023-01879	2023-01-31 05:00:00	Injury	STAAR SURGICAL COMPANY	2023-06-01 04:00:00	QCB	IMPLANTABLE COLLAMER LENS (ICL)	Patient Device Interaction Problem	Headache	P030016	NA	1	Event Description: THE REPORTER INDICATED THAT A 13.2MM, VTICM5_13.2, -9.5/1.5/085 (SPHERE/CYLINDER/AXIS), IMPLANTABLE COLLAMER LENS WAS IMPLANTED INTO THE PATIENT'S RIGHT EYE (OD) ON (B)(6) 2023. LENS WAS EXPLANTED ON (B)(6) 2023 DUE TO PATIENT EXPERIENCING SEVERE AND PERSISTENT HEADACHE AND MIGRAINE. PROBLEM RESOLVED. REPORTEDLY, NO NEW LENS WILL BE IMPLANTED. PATIENT USED HER NORMAL PAINKILLER…	Lens Extraction	Resolved
https://www.accessdata.fda.gov/scripts/cdrh/cfdocs/cfMAUDE/Detail.CFM?MDRFOI__ID=17039559&pc=QCB	2023826-2023-01880	2023-01-31 05:00:00	Injury	STAAR SURGICAL COMPANY	2023-06-01 04:00:00	QCB	IMPLANTABLE COLLAMER LENS (ICL)	Patient Device Interaction Problem	Headache	P030016	NA	1	Event Description: THE REPORTER INDICATED THAT A 13.2MM, VTICMO13.2, -10.5/1.0/085 (SPHERE/CYLINDER/AXIS), IMPLANTABLE COLLAMER LENS WAS IMPLANTED INTO THE PATIENT'S LEFT EYE (OS) ON (B)(6)2023. LENS WAS EXPLANTED ON (B)(6)2023 DUE TO PATIENT EXPERIENCING SEVERE AND PERSISTENT HEADACHE AND MIGRAINE. PROBLEM RESOLVED. REPORTEDLY, NO NEW LENS WILL BE IMPLANTED. PATIENT USED HER NORMAL PAINKILLERS U…	Lens Extraction	Resolved
https://www.accessdata.fda.gov/scripts/cdrh/cfdocs/cfMAUDE/Detail.CFM?MDRFOI__ID=12980949&pc=QCB	2023826-2021-04799	2021-12-02 05:00:00	Injury	STAAR SURGICAL COMPANY	2021-12-10 05:00:00	QCB	IMPLANTABLE COLLAMER LENS (ICL)	Adverse Event Without Identified Device or Use Problem	Headache; Appropriate Clinical Signs, Symptoms, Conditions Term / Code Not Available	NA	NA	1	Event Description: THE REPORTER INDICATED THAT THE SURGEON IMPLANTED A 12.1MM VTICM5_12.1; -1.00/0.50/173 (SPHERE/CYLINDER/AXIS) IMPLANTABLE COLLAMER LENS INTO THE PATIENT'S LEFT EYE (OS) ON (B)(6) 2020. THE PATIENT EXPERIENCED SIGNIFICANT REDUCTION OF IRIDO-CORNEAL ANGLES AND HEADACHES IN THE NIGHT ON THE PATIENT'S LEFT SIDE. ON (B)(6) 2021 THE LENS WAS EXPLANTED AND THIS RESOLVED THE PROBLEM. T…	Lens Extraction	Resolved
https://www.accessdata.fda.gov/scripts/cdrh/cfdocs/cfMAUDE/Detail.CFM?MDRFOI__ID=13641115&pc=QCB	2023826-2022-00645	2022-01-10 05:00:00	Injury	STAAR SURGICAL COMPANY	2022-03-01 05:00:00	QCB	IMPLANTABLE COLLAMER LENS (ICL)	Adverse Event Without Identified Device or Use Problem	Headache; Appropriate Clinical Signs, Symptoms, Conditions Term / Code Not Available	NA	NA	1	Event Description: THE REPORTER INDICATED THE SURGEON IMPLANTED A 12.1MM VTICM5_12.1 IMPLANTABLE COLLAMER LENS, -01.50/+1.0/018 (SPHERE/CYLINDER/AXIS) INTO THE PATIENTS RIGHT EYE (OD) ON (B)(6) 2020. THE LENS WAS EXPLANTED ON (B)(6) 2022 DUE TO SIGNIFICANT REDUCTION OF IRIDO-CORNEAL ANGLES AND PATIENT HAD A HEADACHE AT NIGHT. THE PROBLEM WAS RESOLVED. THE CAUSE OF THE EVENT WAS UNKNOWN. Manufactu…	Lens Extraction	Resolved
https://www.accessdata.fda.gov/scripts/cdrh/cfdocs/cfMAUDE/Detail.CFM?MDRFOI__ID=14294131&pc=QCB	2023826-2022-01424	2022-04-08 04:00:00	Injury	STAAR SURGICAL COMPANY	2022-05-05 04:00:00	QCB	IMPLANTABLE COLLAMER LENS (ICL)	Inadequacy of Device Shape and/or Size	Headache; Appropriate Clinical Signs, Symptoms, Conditions Term / Code Not Available	NA	NA	1	Event Description: THE REPORTER INDICATED THAT THE SURGEON IMPLANTED A 13.7MM VTICMO13.7; -17.50/3.0/101 (SPHERE/CYLINDER/AXIS) IMPLANTABLE COLLAMER LENS INTO THE PATIENT'S RIGHT EYE (OD) ON (B)(6) 2022. THE PATIENT EXPERIENCED EXCESSIVE VAULTING; SIGNIFICANT REDUCTION OF IRIDOCORNEAL ANGLES. IT REPORTED THE CAUSE OF THE EVENT WAS "OTHER" AND NOTED "ICL TOO LARGE - PATIENT WITH HIGH HTO NON-MEASU…	Lens Exchange	Resolved
https://www.accessdata.fda.gov/scripts/cdrh/cfdocs/cfMAUDE/Detail.CFM?MDRFOI__ID=15316632&pc=QCB	2023826-2022-02946	2022-07-26 04:00:00	Injury	STAAR SURGICAL COMPANY	2022-08-29 04:00:00	QCB	IMPLANTABLE COLLAMER LENS (ICL)	Adverse Event Without Identified Device or Use Problem	Headache; Appropriate Clinical Signs, Symptoms, Conditions Term / Code Not Available	P030016	NA	1	Event Description: THE REPORTER INDICATED THAT A 12.6MM VTICM5_12.6 IMPLANTABLE COLLAMER LENS OF -12.50/1.50/064 (SPHERE/CYLINDER/AXIS) WAS IMPLANTED INTO THE PATIENT'S RIGHT EYE (OD) ON (B)(6) 2021. ON (B)(6) 2022 THE LENS WAS EXCPLANTED DUE TO ANISEIKONIA AND HEADACHE. THIS EXCHANGED RESOLVED THE PROBLEM. CAUSE OF EVENT WAS UNKNOWN. Manufacturer Narrative: PATIENT IDENTIFIER: (B)(6). EXPIRATION…	Lens Exchange	Resolved
https://www.accessdata.fda.gov/scripts/cdrh/cfdocs/cfMAUDE/Detail.CFM?MDRFOI__ID=10749935&pc=QCB	2023826-2020-02521	2020-06-17	Injury	STAAR SURGICAL COMPANY	2020-10-28	QCB	IMPLANTABLE COLLAMER LENS (ICL)	Misfocusing; Inadequacy of Device Shape and/or Size	Headache; Blurred Vision; Appropriate Clinical Signs, Symptoms, Conditions Term / Code Not Available	P030016	NA	1	Event Description: THE REPORTER INDICATED THE SURGEON IMPLANTED 12.6MM TMICL12.6 IMPLANTABLE COLLAMER LENS, -13.50/+1.5/090 (SPHERE/CYLINDER/AXIS), INTO THE PATIENTS LEFT EYE (OS) ON (B)(6) 2020. THE SURGEON REPORTS EXCESSIVE VAULT, SIGNIFICANT REDUCTION OF IRIDO-CORNEAL ANGLES (ICA), HEADACHES, INTERMITTENT ANGLE CLOSURE, AND BLURRED VISION. AN ENLARGEMENT OF PI-YAG WAS ALSO PERFORMED. REPORTEDL…	Lens Retention + Secondary Operation	Unknown
https://www.accessdata.fda.gov/scripts/cdrh/cfdocs/cfMAUDE/Detail.CFM?MDRFOI__ID=10749941&pc=QCB	2023826-2020-02520	2020-06-17	Injury	STAAR SURGICAL COMPANY	2020-10-28	QCB	IMPLANTABLE COLLAMER LENS (ICL)	Misfocusing; Inadequacy of Device Shape and/or Size	Headache; Blurred Vision; Appropriate Clinical Signs, Symptoms, Conditions Term / Code Not Available	P030016	NA	1	Event Description: THE REPORTER INDICATED THE SURGEON IMPLANTED 12.6MM TMICL12.6 IMPLANTABLE COLLAMER LENS, -13.50/+1.0/087 (SPHERE/CYLINDER/AXIS), IN THE PATIENTS RIGHT EYE (OD) ON (B)(6) 2020. THE SURGEON REPORTS EXCESSIVE VAULT, SIGNIFICANT REDUCTION OF IRIDO-CORNEAL ANGLES (ICA), HEADACHES, INTERMITTENT ANGLE CLOSURE, AND BLURRED VISION. AN ENLARGEMENT OF PI-YAG WAS ALSO PERFORMED. REPORTEDLY…	Lens Retention + Secondary Operation	Unknown
https://www.accessdata.fda.gov/scripts/cdrh/cfdocs/cfMAUDE/Detail.CFM?MDRFOI__ID=17701923&pc=QCB	2023826-2023-03896	NA	Malfunction	STAAR SURGICAL COMPANY	2023-09-07 04:00:00	QCB	IMPLANTABLE COLLAMER LENS (ICL)	Inadequacy of Device Shape and/or Size	Headache; Blurred Vision; Appropriate Clinical Signs, Symptoms, Conditions Term / Code Not Available; No Clinical Signs, Symptoms or Conditions	P030016	NA	1	Event Description: THE REPORTER INDICATED THAT A 13.2MM VTICM513.2 IMPLANTABLE COLLAMER LENS OF -10.0/2.5/103 (SPHERE/CYLINDER/AXIS) WAS IMPLANTED INTO THE PATIENT'S LEFT EYE (OS) IN 2019. REPORTEDLY, "OVER THE PAST 4 YEARS HAS DEVELOPED AN INCREASED VAULT AND NARROWING ANGLES." Manufacturer Narrative: A4-A6:UNK. H6: WORK ORDER SEARCH: NO SIMILAR COMPLAINTS WITHIN ASSOCIATED LOTS WERE FOUND. CLAI…	Unknown	Unknown
https://www.accessdata.fda.gov/scripts/cdrh/cfdocs/cfMAUDE/Detail.CFM?MDRFOI__ID=17701924&pc=QCB	2023826-2023-03895	NA	Malfunction	STAAR SURGICAL COMPANY	2023-09-07 04:00:00	QCB	IMPLANTABLE COLLAMER LENS (ICL)	Inadequacy of Device Shape and/or Size	Headache; Blurred Vision; Appropriate Clinical Signs, Symptoms, Conditions Term / Code Not Available; No Clinical Signs, Symptoms or Conditions	P030016	NA	1	Event Description: THE REPORTER INDICATED THAT A 13.2MM VTICM513.2 IMPLANTABLE COLLAMER LENS OF -10.0/2.0/083 (SPHERE/CYLINDER/AXIS) WAS IMPLANTED INTO THE PATIENT'S RIGHT EYE (OD) IN 2019. REPORTEDLY, "OVER THE PAST 4 YEARS HAS DEVELOPED AN INCREASED VAULT AND NARROWING ANGLES." Manufacturer Narrative: A4-A6:UNK. H6: WORK ORDER SEARCH: NO SIMILAR COMPLAINTS WITHIN ASSOCIATED LOTS WERE FOUND. CLA…	Unknown	Unknown
https://www.accessdata.fda.gov/scripts/cdrh/cfdocs/cfMAUDE/Detail.CFM?MDRFOI__ID=16916646&pc=QCB	2023826-2023-01725	2023-02-24 05:00:00	Injury	STAAR SURGICAL COMPANY	2023-05-11 04:00:00	QCB	IMPLANTABLE COLLAMER LENS (ICL)	Inadequacy of Device Shape and/or Size; Patient-Device Incompatibility	Headache; Inflammation; Intraocular Pressure Increased; Blurred Vision	P030016	NA	1	Event Description: THE REPORTER INDICATED THAT A 13.2MM VTICM513.2 IMPLANTABLE COLLAMER LENS OF -14.0/3.0/095 (SPHERE/CYLINDER/AXIS) WAS IMPLANTED INTO THE PATIENT'S RIGHT EYE (OD) ON (B)(6) 2022. EXCESSIVE VAULT, INFLAMMATION, ELEVATED IOP WITHOUT PUPIL BLOCK AND ANGLE CLOSURE WERE OBSERVED, AND STEROIDS WERE PROVIDED. IT WAS ALSO STATED, "AS THE PATIENT WAS TOLD BY HER DOCTOR IN USA: 'PERSISTEN…	Lens Extraction	Not_Resolved
https://www.accessdata.fda.gov/scripts/cdrh/cfdocs/cfMAUDE/Detail.CFM?MDRFOI__ID=16916648&pc=QCB	2023826-2023-01726	2023-02-24 05:00:00	Injury	STAAR SURGICAL COMPANY	2023-05-11 04:00:00	QCB	IMPLANTABLE COLLAMER LENS (ICL)	Inadequacy of Device Shape and/or Size; Patient-Device Incompatibility	Headache; Inflammation; Intraocular Pressure Increased; Blurred Vision	P030016	NA	1	Event Description: THE REPORTER INDICATED THAT A 13.2MM VTICM513.2 IMPLANTABLE COLLAMER LENS OF -14.0/2.5/078 (SPHERE/CYLINDER/AXIS) WAS IMPLANTED INTO THE PATIENT'S LEFT EYE (OS) ON (B)(6) 2022. EXCESSIVE VAULT AND INFLAMATION WITH ELEVATED IOP WERE OBSERVED, AND STEROIDS WERE PROVIDED. IT WAS ALSO STATED, "AS THE PATIENT WAS TOLD BY HER DOCTOR IN USA: 'PERSISTENT INFLAMMATION THAT IS CAUSING HE…	Lens Extraction	Not_Resolved
https://www.accessdata.fda.gov/scripts/cdrh/cfdocs/cfMAUDE/Detail.CFM?MDRFOI__ID=13173083&pc=QCB	2023826-2022-00057	2021-12-02 05:00:00	Injury	STAAR SURGICAL COMPANY	2022-01-05 05:00:00	QCB	IMPLANTABLE COLLAMER LENS (ICL)	Inadequacy of Device Shape and/or Size	Headache; Intraocular Pressure Increased; Appropriate Clinical Signs, Symptoms, Conditions Term / Code Not Available	NA	NA	1	Event Description: THE REPORTER INDICATED THE SURGEON IMPLANTED A 13.2MM VTICM5_13.2 IMPLANTABLE COLLAMER LENS, -11.00/+3.0/172, INTO THE PATIENTS LEFT EYE (OS) ON (B)(6) 2021. THE LENS WAS EXPLANTED ON 2021 DUE TO EXCESSIVE VAULTING, SHALLOW CHAMBER, SIGNIFICANT REDUCTION OF ANGLE AND ELEVATED INTRAOCULAR PRESSURE (IOP). THE PATIENT COMPLAINED OF A HEADACHE, WHICH WAS RESOLVED WITH MEDICATION (D…	Lens Exchange	Unknown
https://www.accessdata.fda.gov/scripts/cdrh/cfdocs/cfMAUDE/Detail.CFM?MDRFOI__ID=14274802&pc=QCB	2023826-2022-01399	2022-04-07 04:00:00	Injury	STAAR SURGICAL COMPANY	2022-05-04 04:00:00	QCB	IMPLANTABLE COLLAMER LENS (ICL)	Adverse Event Without Identified Device or Use Problem	Headache; Intraocular Pressure Increased; Appropriate Clinical Signs, Symptoms, Conditions Term / Code Not Available	NA	NA	1	Event Description: THE REPORTER INDICATED THAT THE SURGEON IMPLANTED A 13.2MM VTICM5_13.2; -13.0/+1.0/14 (SPHERE/CYLINDER/AXIS) IMPLANTABLE COLLAMER LENS INTO THE PATIENT'S LEFT EYE (OS) ON (B)(6) 2022. THE PATIENT EXPERIENCED ANGLE CLOSURE WITH ELEVATED INTRAOCULAR PRESSURE; UNREACTIVE FIXED PUPIL. ON (B)(6) 2022 THE LENS WAS EXPLANTED AND IT WAS ADDITIONALLY REPORTED THAT THERE IS NO PLANS TO R…	Lens Extraction	Unknown
https://www.accessdata.fda.gov/scripts/cdrh/cfdocs/cfMAUDE/Detail.CFM?MDRFOI__ID=16433012&pc=QCB	2023826-2023-00707	2023-01-14 05:00:00	Injury	STAAR SURGICAL COMPANY	2023-02-23 05:00:00	QCB	IMPLANTABLE COLLAMER LENS (ICL)	Inadequacy of Device Shape and/or Size; Patient-Device Incompatibility	Headache; Intraocular Pressure Increased; Appropriate Clinical Signs, Symptoms, Conditions Term / Code Not Available	P030016	NA	1	Event Description: THE REPORTER INDICATED THAT THE SURGEON IMPLANTED A 13.2MM VTICMO13.2; -16.5/1.0/074 (SPHERE/CYLINDER/AXIS) IMPLANTABLE COLLAMER LENS INTO THE PATIENT'S LEFT EYE (OS) ON (B)(6) 2023. THE SURGEON REPORTS THE PATIENT EXPERIENCED EXCESSIVE VAULTING; SIGNIFICANT REDUCTION OF IRIDO-CORNEAL ANGLES; ANGLE CLOSURE WITH ELEVATED INTRAOCULAR PRESSURE; HEADACHES; SHALLOW ANTERIOR CHAMBER.…	Lens Extraction	Resolved
https://www.accessdata.fda.gov/scripts/cdrh/cfdocs/cfMAUDE/Detail.CFM?MDRFOI__ID=16433013&pc=QCB	2023826-2023-00708	2023-01-14 05:00:00	Injury	STAAR SURGICAL COMPANY	2023-02-23 05:00:00	QCB	IMPLANTABLE COLLAMER LENS (ICL)	Inadequacy of Device Shape and/or Size; Patient-Device Incompatibility	Headache; Intraocular Pressure Increased; Appropriate Clinical Signs, Symptoms, Conditions Term / Code Not Available	P030016	NA	1	Event Description: THE REPORTER INDICATED THAT THE SURGEON IMPLANTED A 13.2MM VTICMO13.2; -17.0/2.0/115 (SPHERE/CYLINDER/AXIS) IMPLANTABLE COLLAMER LENS INTO THE PATIENT'S RIGHT EYE (OD) ON (B)(6) 2023. THE SURGEON REPORTS THE PATIENT EXPERIENCED EXCESSIVE VAULTING; SIGNIFICANT REDUCTION OF IRIDO-CORNEAL ANGLES; ANGLE CLOSURE WITH ELEVATED INTRAOCULAR PRESSURE; HEADACHES; SHALLOW ANTERIOR CHAMBER…	Lens Extraction	Not_Resolved
https://www.accessdata.fda.gov/scripts/cdrh/cfdocs/cfMAUDE/Detail.CFM?MDRFOI__ID=16947904&pc=QCB	2023826-2023-01916	2023-03-25 04:00:00	Injury	STAAR SURGICAL COMPANY	2023-05-17 04:00:00	QCB	IMPLANTABLE COLLAMER LENS (ICL)	Adverse Event Without Identified Device or Use Problem	Headache; Intraocular Pressure Increased; Appropriate Clinical Signs, Symptoms, Conditions Term / Code Not Available	P030016	NA	1	Event Description: THE REPORTER INDICATED THAT A 13.2MM, VTICM5_13.2, -4.50/6.0/180 (SPHERE/CYLINDER/AXIS), IMPLANTABLE COLLAMER LENS WAS IMPLANTED INTO THE PATIENTS RIGHT EYE (OD) ON (B)(6) 2023. ON (B)(6) 2023 THE LENS WAS REPOSITIONED/ROTATED, PER REPORTER THE PATIENT PRESENTED WITH ELEVATED INTRAOCULAR PRESSURE, HEADACHE AND NAUSEA FOLLOWING REPOSITIONING. FIBRIN PLUG OVER CENTRAFLOW HOLE WAS…	Lens Retention + Secondary Operation	Resolved
https://www.accessdata.fda.gov/scripts/cdrh/cfdocs/cfMAUDE/Detail.CFM?MDRFOI__ID=9781744&pc=QCB	2023826-2020-00390	NA	Injury	STAAR SURGICAL COMPANY	2020-03-03 05:00:00	QCB	IMPLANTABLE COLLAMER LENS (ICL)	Misfocusing; Inadequacy of Device Shape and/or Size; Patient-Device Incompatibility	Headache; Intraocular Pressure Increased; Blurred Vision; No Code Available	P030016	NA	1	Event Description: THE REPORTER INDICATED THAT THE SURGEON IMPLANTED A 13.2MM TMICL13.2 LENS, -12.0/+2.5/114 (SPHERE/CYLINDER/AXIS) INTO THE PATIENT'S RIGHT (OD) EYE ON (B)(6) 2020. ON (B)(6) 2020 THE LENS WAS EXCHANGED WITH A SHORTER LENS DUE TO EXCESSIVE VAULT, ELEVATED IOP, SIGNIFICANT REDUCTION OF IRIDO-CORNEAL ANGLES (ICA), ANGLE CLOSURE, BLURRED VISION, AND HEADACHES. THE PROBLEM IS RESOLVE…	Lens Exchange	Resolved
https://www.accessdata.fda.gov/scripts/cdrh/cfdocs/cfMAUDE/Detail.CFM?MDRFOI__ID=11200458&pc=QCB	2023826-2021-00183	2020-12-15 05:00:00	Injury	STAAR SURGICAL COMPANY	2021-01-20 05:00:00	QCB	IMPLANTABLE COLLAMER LENS (ICL)	Adverse Event Without Identified Device or Use Problem	Headache; Intraocular Pressure Increased; Pupillary Block; Blurred Vision; Eye Pain	P030016	NA	1	Event Description: THE REPORTER INDICATED THAT A 13.2MM, TMICL13.2, -15.00/1.5/78 (SPHERE/CYLINDER/AXIS), IMPLANTABLE COLLAMER LENS WAS IMPLANTED INTO THE PATIENTS LEFT EYE (OS) ON (B)(6) 2020. THE PATIENT EXPERIENCED PAIN, HEADACHE, LIGHT SENSITIVITY, AND BLURRY VISION. PUPIL BLOCK WITH ELEVATED IOP WAS OBSERVED. ADDITIONAL SURGICAL INTERVENTION (YAG PI) AND MEDICAL INTERVENTION (TROPICAMIDE, PH…	Lens Retention + Secondary Operation	Resolved
https://www.accessdata.fda.gov/scripts/cdrh/cfdocs/cfMAUDE/Detail.CFM?MDRFOI__ID=14145766&pc=QCB	2023826-2022-01205	NA	Injury	STAAR SURGICAL COMPANY	2022-04-19 04:00:00	QCB	IMPLANTABLE COLLAMER LENS (ICL)	Misfocusing	Headache; Intraocular Pressure Increased; Pupillary Block; Blurred Vision; Eye Pain	N/A	NA	1	Event Description: THE REPORTER INDICATED THAT A 12.6MM VTICM5_12.6, -11.5/+1.5/076 (SPHERE/CYLINDER/AXIS) IMPLANTABLE COLLAMER LENS WAS IMPLANTED INTO THE PATIENT'S LEFT EYE (OS) ON (B)(6) 2021. ON (B)(6) 2022 A PI-YAG WAS PERFORMED, THE SURGEON REPORTING TRANSIENT LOSS OF BCVA, PERIORBITAL EYE PAIN, HEADACHE, ELEVATED IOP, AND POSSIBLE INTERMITTENT BOUTS OF PUPILLARY BLOCK PRIOR TO LASER PI. TH…	Lens Extraction + Secondary Operation	Unknown
https://www.accessdata.fda.gov/scripts/cdrh/cfdocs/cfMAUDE/Detail.CFM?MDRFOI__ID=9677189&pc=QCB	2023826-2020-00248	2019-12-11 05:00:00	Injury	STAAR SURGICAL COMPANY	2020-02-06 05:00:00	QCB	IMPLANTABLE COLLAMER LENS (ICL)	Inadequacy of Device Shape and/or Size	Headache; Intraocular Pressure Increased; Vomiting; No Code Available	N/A	NA	1	Event Description: THE REPORTER INDICATED THAT A VTICM5_13.7, -7.50/2.5/083 (SPHERE/CYLINDER/AXIS), IMPLANTABLE COLLAMER LENS WAS IMPLANTED INTO THE PATIENTS LEFT EYE (OS) ON (B)(6) 2019. EXCESSIVE VAULT, SIGNIFICANT REDUCTION OF IRIDO-CORNEAL ANGLES AND PIGMENT DISPERSION WERE REPORTED. THE REPORTER ALSO STATED THAT "IRIS HAS BEEN DAMAGED AT THE LIMBAL REGION, WHERE YOU CAN SEE THAT THE PIGMENT …	Lens Retention + Secondary Operation	Unknown
https://www.accessdata.fda.gov/scripts/cdrh/cfdocs/cfMAUDE/Detail.CFM?MDRFOI__ID=9677374&pc=QCB	2023826-2020-00249	2019-12-11 05:00:00	Injury	STAAR SURGICAL COMPANY	2020-02-06 05:00:00	QCB	IMPLANTABLE COLLAMER LENS (ICL)	Inadequacy of Device Shape and/or Size	Headache; Intraocular Pressure Increased; Vomiting; No Code Available; Appropriate Clinical Signs, Symptoms, Conditions Term / Code Not Available	N/A	NA	1	Event Description: THE REPORTER INDICATED THAT A VTICM5_13.7, -7.00/2.5/091 (SPHERE/CYLINDER/AXIS), IMPLANTABLE COLLAMER LENS WAS IMPLANTED INTO THE PATIENTS RIGHT EYE (OD) ON (B)(6) 2019. EXCESSIVE VAULT, SIGNIFICANT REDUCTION OF IRIDO-CORNEAL ANGLES AND PIGMENT DISPERSION WERE REPORTED. SECONDARY SURGICAL INTERVENTION (YAG) WAS PERFORMED ON POST-OP DAY 1 "BECAUSE THE CONDITION OF THE EYE AND PA…	Lens Retention + Secondary Operation	Unknown
https://www.accessdata.fda.gov/scripts/cdrh/cfdocs/cfMAUDE/Detail.CFM?MDRFOI__ID=11616940&pc=QCB	2023826-2021-00926	2021-02-11 05:00:00	Injury	STAAR SURGICAL COMPANY	2021-04-05 04:00:00	QCB	IMPLANTABLE COLLAMER LENS (ICL)	Misfocusing; Adverse Event Without Identified Device or Use Problem	Headache; No Clinical Signs, Symptoms or Conditions	NA	NA	1	Event Description: THE REPORTER INDICATED THE SURGEON IMPLANTED A 13.2MM VTICMO13.2 IMPLANTABLE COLLAMER LENS, -07.50/+1.5/095 (SPHERE/CYLINDER/AXIS), IN THE PATIENTS RIGHT EYE (OD), ON (B)(6) 2021. THE LENS WAS EXPLANTED ON (B)(6) 2021 DUE TO A LENS WITH THE WRONG AXIS WAS IMPLANTED. ANOTHER LENS WAS NOT IMPLANTED. THE CAUSE OF THE EVENT WAS DUE TO USER ERROR/UNKNOWN. Manufacturer Narrative: COR…	Lens Exchange	Resolved
https://www.accessdata.fda.gov/scripts/cdrh/cfdocs/cfMAUDE/Detail.CFM?MDRFOI__ID=8941304&pc=QCB	2023826-2019-01572	2018-12-01 05:00:00	Injury	STAAR SURGICAL COMPANY	2019-08-28 04:00:00	QCB	IMPLANTABLE COLLAMER LENS (ICL)	Adverse Event Without Identified Device or Use Problem	Headache; No Code Available	NA	NA	1	Event Description: THE REPORTER INDICATED THAT THE SURGEON IMPLANTED A 12.6MM VTICM5_12.6 IMPLANTABLE COLLAMER LENS, -10.5/+2.0/095 (SPHERE/CYLINDER/AXIS), INTO THE PATIENT'S RIGHT EYE (OD) ON (B)(6) 2018. ON (B)(6) 2019 THE LENS WAS EXPLANTED DUE TO "HEADACHE." Manufacturer Narrative: DEVICE EVALUATION: THE LENS WAS RETURNED DRY IN A MICRO-CENTRIFUGE VIAL. THERE WAS CLEAR SURGICAL RESIDUE ON THE…	Lens Extraction	Unknown
https://www.accessdata.fda.gov/scripts/cdrh/cfdocs/cfMAUDE/Detail.CFM?MDRFOI__ID=8941310&pc=QCB	2023826-2019-01573	2018-12-01 05:00:00	Injury	STAAR SURGICAL COMPANY	2019-08-28 04:00:00	QCB	IMPLANTABLE COLLAMER LENS (ICL)	Adverse Event Without Identified Device or Use Problem	Headache; No Code Available	NA	NA	1	Event Description: THE REPORTER INDICATED THAT THE SURGEON IMPLANTED A 12.6MM VTICM5_12.6 IMPLANTABLE COLLAMER LENS, -9.0/+1.5/092 (SPHERE/CYLINDER/AXIS), INTO THE PATIENT'S LEFT EYE (OS) ON (B)(6) 2018. ON (B)(6) 2019 THE LENS WAS EXPLANTED DUE TO "HEADACHE." Manufacturer Narrative: DEVICE EVALUATION: THE LENS WAS RETURNED DRY IN A MICRO-CENTRIFUGE VIAL. THERE WAS CLEAR SURGICAL RESIDUE ON THE L…	Lens Extraction	Unknown
https://www.accessdata.fda.gov/scripts/cdrh/cfdocs/cfMAUDE/Detail.CFM?MDRFOI__ID=16275294&pc=QCB	2023826-2023-00263	2022-11-23 05:00:00	Injury	STAAR SURGICAL COMPANY	2023-01-31 05:00:00	QCB	IMPLANTABLE COLLAMER LENS (ICL)	Inadequacy of Device Shape and/or Size	Headache; Pain; Appropriate Clinical Signs, Symptoms, Conditions Term / Code Not Available; No Clinical Signs, Symptoms or Conditions	P030016	NA	1	Event Description: THE REPORTER INDICATED THE SURGEON IMPLANTED A 13.2MM VTICM5_13.2 IMPLANTABLE COLLAMER LENS, -09.00/+3.5/092 (SPHERE/CYLINDER/AXIS), IN THE PATIENTS LEFT EYE (OS), ON AUG-2022. THE LENS WAS REPORTED AS EXCESSIVE VAULTING AND REMAINED IMPLANTED. ADDITIONAL INFORMATION HAS BEEN REQUESTED BUT NONE HAS BEEN FORTHCOMING. Manufacturer Narrative: B5: THE LENS WAS EXPLANTED ON (B)(6) 2…	Lens Extraction	Unknown
https://www.accessdata.fda.gov/scripts/cdrh/cfdocs/cfMAUDE/Detail.CFM?MDRFOI__ID=16275298&pc=QCB	2023826-2023-00262	2022-11-23 05:00:00	Injury	STAAR SURGICAL COMPANY	2023-01-31 05:00:00	QCB	IMPLANTABLE COLLAMER LENS (ICL)	Inadequacy of Device Shape and/or Size	Headache; Pain; Appropriate Clinical Signs, Symptoms, Conditions Term / Code Not Available; No Clinical Signs, Symptoms or Conditions	P030016	NA	1	Event Description: THE REPORTER INDICATED THE SURGEON IMPLANTED A 13.2MM VTICM5_13.2 IMPLANTABLE COLLAMER LENS, -08.00/+2.5/087(SPHERE/CYLINDER/AXIS), IN THE PATIENTS RIGHT EYE (OD), ON AUG-2022. THE LENS WAS REPORTED AS EXCESSIVE VAULTING AND REMAINED IMPLANTED. ADDITIONAL INFORMATION HAS BEEN REQUESTED BUT NONE HAS BEEN FORTHCOMING. Manufacturer Narrative: PATIENT IDENTIFIER: UNK. PROCODE: UNK.…	Lens Extraction	Unknown
https://www.accessdata.fda.gov/scripts/cdrh/cfdocs/cfMAUDE/Detail.CFM?MDRFOI__ID=8182322&pc=QCB	2023826-2018-01885	2018-11-13 05:00:00	Injury	STAAR SURGICAL COMPANY	2018-12-19 05:00:00	QCB	IMPLANTABLE COLLAMER LENS (ICL)	Inadequacy of Device Shape and/or Size	Headache; Pain; No Code Available	NA	NA	1	Event Description: THE REPORTER INDICATED THE SURGEON IMPLANTED A 13.2MM VTICMO13.2 IMPLANTABLE COLLAMER LENS, -4.00/+4.0/033 (SPHERE/CYLINDER/AXIS) IN THE PATIENT'S LEFT EYE (OS), ON (B)(6) 2018. THE REPORTER INDICATED THE LENS HAD EXCESSIVE VAULTING AND THE PATIENT EXPERIENCED SEVERE HEADACHE. THE REPORTER INDICATED THE RELATED SYMPTOM MAY BE DUE TO SHALLOW ANTERIOR CHAMBER (MID PERIPHERAL IRID…	Lens Exchange	Resolved
https://www.accessdata.fda.gov/scripts/cdrh/cfdocs/cfMAUDE/Detail.CFM?MDRFOI__ID=15070995&pc=QCB	2023826-2022-02369	2022-05-02 04:00:00	Injury	STAAR SURGICAL COMPANY	2022-07-20 04:00:00	QCB	IMPLANTABLE COLLAMER LENS (ICL)	Off-Label Use; Optical Problem	Headache; Visual Disturbances; Halo	P030016	NA	1	Event Description: THE REPORTER INDICATED THAT THE SURGEON IMPLANTED A 12.6MM VTICMO12.6; -8.5/1.0/087 (SPHERE/CYLINDER/AXIS) IMPLANTABLE COLLAMER LENS INTO THE PATIENT'S RIGHT EYE (OD) ON (B)(6) 2022. THE PATIENT EXPERIENCED GLARE/HALOES AND COMPLAINED OF HEADACHES; AND EXAMINATION SHOWED NO ABNORMALITIES. ON (B)(6) 2022 THE LENS WAS EXPLANTED. THIS RESOLVED THE PROBLEM. THE CAUSE OF THE EVENT W…	Lens Extraction	Resolved
https://www.accessdata.fda.gov/scripts/cdrh/cfdocs/cfMAUDE/Detail.CFM?MDRFOI__ID=15070996&pc=QCB	2023826-2022-02370	2022-05-02 04:00:00	Injury	STAAR SURGICAL COMPANY	2022-07-20 04:00:00	QCB	IMPLANTABLE COLLAMER LENS (ICL)	Off-Label Use; Optical Problem	Headache; Visual Disturbances; Halo	P030016	NA	1	Event Description: THE REPORTER INDICATED THAT THE SURGEON IMPLANTED A 12.6MM VTICMO12.6; -8.0/1.0/081 (SPHERE/CYLINDER/AXIS) IMPLANTABLE COLLAMER LENS INTO THE PATIENT'S LEFT EYE (OS) ON (B)(6) 2022. THE PATIENT EXPERIENCED GLARE/HALOES AND COMPLAINED OF HEADACHES; AND EXAMINATION SHOWED NO ABNORMALITIES. ON (B)(6) 2022 THE LENS WAS EXPLANTED. THIS RESOLVED THE PROBLEM. THE CAUSE OF THE EVENT WA…	Lens Extraction	Resolved
https://www.accessdata.fda.gov/scripts/cdrh/cfdocs/cfMAUDE/Detail.CFM?MDRFOI__ID=17986875&pc=QCB	2023826-2023-04601	2023-01-13 05:00:00	Injury	STAAR SURGICAL COMPANY	2023-10-23 04:00:00	QCB	IMPLANTABLE COLLAMER LENS (ICL)	Optical Problem	Headache; Visual Disturbances; Halo; Appropriate Clinical Signs, Symptoms, Conditions Term / Code Not Available	P030016	NA	1	Event Description: THE REPORTER INDICATED THAT THE SURGEON IMPLANTED A 12.1MM VTICM5_12.1, -11.0/1.5/080 (SPHERE/CYLINDER/AXIS), IMPLANTABLE COLLAMER LENS, INTO THE PATIENT'S LEFT EYE (OS) ON (B)(6) 2022. ON (B)(6) 2023 THE LENS WAS EXPLANTED DUE TO GLARE/HALOS, HEADACHE, AND PATIENT DISSTATISFACTION. PROBLEM RESOLVED. Manufacturer Narrative: A4 - UNK. A5 - UNK. A6 - UNK. H6 - WORK ORDER SEARCH: …	Lens Extraction	Resolved
https://www.accessdata.fda.gov/scripts/cdrh/cfdocs/cfMAUDE/Detail.CFM?MDRFOI__ID=10548122&pc=QCB	2023826-2020-02091	2020-08-22 04:00:00	Malfunction	STAAR SURGICAL COMPANY	2020-09-17 04:00:00	QCB	IMPLANTABLE COLLAMER LENS (ICL)	Off-Label Use; No Apparent Adverse Event	Headache; Vomiting	N/A#S-P#N/A	NA	1	Event Description: THE REPORTER INDICATED THAT A 12.6MM, VTICM5_12.6, -7.50/1.0/074 (SPHERE/CYLINDER/AXIS), IMPLANTABLE COLLAMER LENS WAS IMPLANTED INTO THE PATIENT'S RIGHT EYE (OD) ON (B)(6) 2020. PRESSURE 16MMHG, OPEN ANGLE, WERE OBSERVED. HEADACHE AND VOMIT WERE OCCSSIONALLY FELT BY PATIENT. LENS REMAINS IMPLANTED. CAUSE OF THE EVENT IS REPORTED AS UNKNOWN. PER THE REPORTER ON (B)(6) 2020, "SE…	Lens Retention	Unknown
https://www.accessdata.fda.gov/scripts/cdrh/cfdocs/cfMAUDE/Detail.CFM?MDRFOI__ID=10548144&pc=QCB	2023826-2020-02092	2020-08-22 04:00:00	Malfunction	STAAR SURGICAL COMPANY	2020-09-17 04:00:00	QCB	IMPLANTABLE COLLAMER LENS (ICL)	Off-Label Use; No Apparent Adverse Event	Headache; Vomiting	N/A#S-P#N/A	NA	1	Event Description: THE REPORTER INDICATED THAT A 12.6MM, VTICM5_12.6, -8.00/1.5/068 (SPHERE/CYLINDER/AXIS), IMPLANTABLE COLLAMER LENS WAS IMPLANTED INTO THE PATIENT'S LEFT EYE (OS) ON (B)(6) 2020. PRESSURE 16MMHG, OPEN ANGLE, WERE OBSERVED. HEADACHE AND VOMIT WERE OCCASIONALLY FELT BY PATIENT. LENS REMAINS IMPLANTED. CAUSE OF THE EVENT IS REPORTED AS UNKNOWN. PER THE REPORTER ON (B)(6) 2020, "SUR…	Lens Retention	Unknown
https://www.accessdata.fda.gov/scripts/cdrh/cfdocs/cfMAUDE/Detail.CFM?MDRFOI__ID=12147542&pc=QCB	2023826-2021-02274	NA	Injury	STAAR SURGICAL COMPANY	2021-07-09 04:00:00	QCB	IMPLANTABLE COLLAMER LENS (ICL)	Unintended Movement	Inflammation; Intraocular Pressure Increased	P030016	NA	1	Event Description: THE REPORTER INDICATED THAT THE SURGEON IMPLANTED UPSIDE DOWN A 13.2MM TMICL13.2, -11.50/3.5/109 (SPHERE/CYLINDER/AXIS), IMPLANTABLE COLLAMER LENS, INTO THE PATIENT'S EYE ON (B)(6) 2021. THERE WAS PATIENT CONTACT (LENS TOUCHED THE EYE) WITH NO PATIENT INJURY. ELEVATED IOP, INFLAMMATION AND PIGMENT DEBRIS OBSERVED. THE LENS WAS REMOVED AND CATARACT SURGERY WAS PERFORMED AND A NE…	Lens Exchange	Unknown
https://www.accessdata.fda.gov/scripts/cdrh/cfdocs/cfMAUDE/Detail.CFM?MDRFOI__ID=14058808&pc=QCB	2023826-2022-01151	2022-03-01 05:00:00	Injury	STAAR SURGICAL COMPANY	2022-04-08 04:00:00	QCB	IMPLANTABLE COLLAMER LENS (ICL)	Adverse Event Without Identified Device or Use Problem	Inflammation; Intraocular Pressure Increased; Appropriate Clinical Signs, Symptoms, Conditions Term / Code Not Available	NA	NA	1	Event Description: THE REPORTER INDICATED THAT THE SURGEON IMPLANTED A 12.6MM VTICM5_12.6, -10.0/+1.5/113 (SPHERE/CYLINDER/AXIS) IMPLANTABLE COLLAMER LENS INTO THE PATIENT'S RIGHT EYE (OD) ON (B)(6) 2022. THE PATIENT EXPERIENCED ELEVATED INTRAOCULAR PRESSURE AND PIGMENT DISPERSION. ON (B)(6) 2022 SECONDARY YAG WAS PERFORMED. PER UPDATED INFORMATION AS OF (B)(6) 2022 INTRAOCULAR PRESSURE WAS 42MMH…	Lens Retention + Secondary Operation	Resolved
https://www.accessdata.fda.gov/scripts/cdrh/cfdocs/cfMAUDE/Detail.CFM?MDRFOI__ID=14062269&pc=QCB	2023826-2022-01150	2022-03-01 05:00:00	Injury	STAAR SURGICAL COMPANY	2022-04-08 04:00:00	QCB	IMPLANTABLE COLLAMER LENS (ICL)	Adverse Event Without Identified Device or Use Problem	Inflammation; Intraocular Pressure Increased; Appropriate Clinical Signs, Symptoms, Conditions Term / Code Not Available	NA	NA	1	Event Description: THE REPORTER INDICATED THAT THE SURGEON IMPLANTED A 12.6MM VTICM5_12.1, -8.00/+1.5/087 (SPHERE/CYLINDER/AXIS) IMPLANTABLE COLLAMER LENS INTO THE PATIENT'S RIGHT EYE (OD) ON (B)(6) 2021. THE PATIENT EXPERIENCED ELEVATED INTRAOCULAR PRESSURE, INFLAMMATION AND PIGMENT DISPERSION. MEDICAL INTERVENTION WAS PRESCRIBED, IT WAS REPORTED THAT THE CONDITION OF THE PATIENT IS IMPROVING. P…	Lens Retention	Resolved
https://www.accessdata.fda.gov/scripts/cdrh/cfdocs/cfMAUDE/Detail.CFM?MDRFOI__ID=17741439&pc=QCB	2023826-2023-03979	2023-01-18 05:00:00	Injury	STAAR SURGICAL COMPANY	2023-09-13 04:00:00	QCB	IMPLANTABLE COLLAMER LENS (ICL)	Adverse Event Without Identified Device or Use Problem	Inflammation; Intraocular Pressure Increased; Appropriate Clinical Signs, Symptoms, Conditions Term / Code Not Available	P030016	NA	1	Event Description: THE REPORTER INDICATED THE SURGEON IMPLANTED A 12.6MM VTICM5_12.6 IMPLANTABLE COLLAMER LENS, -09.50/+3.0/102 (SPHERE/CYLINDER/AXIS), INTO THE PATIENTS RIGHT EYE (OD) ON (B)(6) 2023. THE LENS WAS REMOVED ON (B)(6) 2023 DUE TO PATIENT EXPERIENCED ELEVATED INTRAOCULAR PRESSURE (IOP) AND PIGMENT DISPERSION. PATIENT DEVELOPED CHRONIC INFLAMMATION WITH HIGH IOP. MEDICATION WAS ADMINI…	Lens Extraction	Unknown
https://www.accessdata.fda.gov/scripts/cdrh/cfdocs/cfMAUDE/Detail.CFM?MDRFOI__ID=17549694&pc=QCB	2023826-2023-03497	2023-06-24 04:00:00	Injury	STAAR SURGICAL COMPANY	2023-08-15 04:00:00	QCB	IMPLANTABLE COLLAMER LENS (ICL)	Misfocusing; Off-Label Use; Inadequacy of Device Shape and/or Size; Patient-Device Incompatibility	Inflammation; Intraocular Pressure Increased; Blurred Vision; Appropriate Clinical Signs, Symptoms, Conditions Term / Code Not Available	P030016	NA	1	Event Description: THE REPORTER INDICATED THAT A,12.6MM VTICM512.6 IMPLANTABLE COLLAMER LENS OF -18.0/1.00/093 (SPHERE/CYLINDER/AXIS) WAS IMPLANTED INTO THE PATIENT'S LEFT EYE (OS) ON (B)(6) 2023. ON (B)(6) 2023, THE LENS WAS REMOVED DUE TO ELEVATED IOP, SIGNIFICANT REDUCTION OF IRIDOCORNEAL ANGLES, PIGMENT DISPERSION, UNREACTIVE (FIXED) PUPIL, AND BLURRED VISION. THE PROBLEM WAS NOT RESOLVED. RE…	Lens Extraction	Not_Resolved
https://www.accessdata.fda.gov/scripts/cdrh/cfdocs/cfMAUDE/Detail.CFM?MDRFOI__ID=8984492&pc=QCB	2023826-2019-01675	2018-09-25 04:00:00	Injury	STAAR SURGICAL COMPANY	2019-09-10 04:00:00	QCB	IMPLANTABLE COLLAMER LENS (ICL)	Inadequacy of Device Shape and/or Size; Adverse Event Without Identified Device or Use Problem	Inflammation; Intraocular Pressure Increased; Iritis; Red Eye(s); No Code Available	NA	NA	1	Event Description: THE REPORTER INDICATED THE SURGEON IMPLANTED A 12.1MM VTICMO12.1 IMPLANTABLE COLLAMER LENS, -08.50/+1.5/059 (SPHERE/CYLINDER/AXIS), IN THE PATIENTS LEFT EYE (OS), ON (B)(6) 2018. THE LENS WAS EXPLANTED 2 WEEKS AFTER THE INITIAL SURGERY DUE TO POSSIBLE INFLAMMATION. ELEVATED INTRAOCULAR PRESSURE WAS ALSO REPORTED. ADDITIONAL INFORMATION HAS BEEN REQUESTED BUT NONE HAS BEEN FORTH…	Lens Extraction	Unknown
https://www.accessdata.fda.gov/scripts/cdrh/cfdocs/cfMAUDE/Detail.CFM?MDRFOI__ID=15336964&pc=QCB	2023826-2022-02893	2022-07-29 04:00:00	Injury	STAAR SURGICAL COMPANY	2022-09-01 04:00:00	QCB	IMPLANTABLE COLLAMER LENS (ICL)	Off-Label Use; Unintended Movement	Inflammation; Intraocular Pressure Increased; Pupillary Block; Appropriate Clinical Signs, Symptoms, Conditions Term / Code Not Available	P030016	NA	1	Event Description: THE REPORTER INDICATED THAT A 12.6MM VTICM5 12.6 IMPLANTABLE COLLAMER LENS OF -7.50/2.0/078 (SPHERE/CYLINDER/AXIS) WAS IMPLANTED INTO THE PATIENT'S LEFT EYE (OS) ON (B)(6) 2022. NARROW ANGLES AND IRIS ELEVATED REPORTED DUE TO LENS IMPLANTED UPSIDE DOWN. ATTEMPTS TO OBTAIN ADDITIONAL INFORMATION HAVE NOT BEEN SUCCESSFUL. IF ADDITIONAL INFORMATION IS RECEIVED A SUPPLEMENTAL MEDWA…	Unknown	Unknown
https://www.accessdata.fda.gov/scripts/cdrh/cfdocs/cfMAUDE/Detail.CFM?MDRFOI__ID=18136620&pc=QCB	2023826-2023-05112	2023-09-25 04:00:00	Injury	STAAR SURGICAL COMPANY	2023-11-14 05:00:00	QCB	IMPLANTABLE COLLAMER LENS (ICL)	Adverse Event Without Identified Device or Use Problem	Inflammation; Pain; Appropriate Clinical Signs, Symptoms, Conditions Term / Code Not Available	P030016	NA	1	Event Description: THE REPORTER INDICATED THAT THE SURGEON IMPLANTED A 13.2MM VTICM5_13.2; -11.50/+1.5/072 (SPHERE/CYLINDER/AXIS) IMPLANTABLE COLLAMER LENS INTO THE PATIENT'S RIGHT EYE (OD) ON (B)(6) 2023. THE LENS HAD TORE DURING INJECTION/DELIVERY INTO THE EYE. INTRAOPERATIVELY THE LENS WAS REMOVED. IT WAS NOTED THAT "OD PAIN EYELID EDEMA - INFLAMMATION DESPITE ANTI-INFLAMMATORY EYE DROPS FOR 3…	Lens Retention	Unknown
https://www.accessdata.fda.gov/scripts/cdrh/cfdocs/cfMAUDE/Detail.CFM?MDRFOI__ID=10556172&pc=QCB	2023826-2020-02123	NA	Injury	STAAR SURGICAL COMPANY	2020-09-18 04:00:00	QCB	IMPLANTABLE COLLAMER LENS (ICL)	Inadequacy of Device Shape and/or Size	Intraocular Pressure Decreased	N/A	NA	1	Event Description: THE REPORTER INDICATED THAT THE SURGEON IMPLANTED A 13.2MM VTICMO13.2 IMPLANTABLE COLLAMER LENS, -9.5/+2.0/080 (SPHERE/CYLINDER/AXIS), INTO THE PATIENT'S LEFT EYE (OS) ON (B)(6)2020. THE SURGEON REPORTS A HIGH VAULT OF 1006UM AND AN IOP<5MMHG. HOWEVER, BECAUSE OF HYPOTONY AND IRIS INCISION AND AFTER CORNEAL SUTURE, THE VAULT IS 720UM. REPORTEDLY, THE LENS REMAINS IMPLANTED. THE…	Lens Exchange	Resolved
https://www.accessdata.fda.gov/scripts/cdrh/cfdocs/cfMAUDE/Detail.CFM?MDRFOI__ID=10619462&pc=QCB	2023826-2020-02273	2020-09-01	Malfunction	STAAR SUGICAL COMPANY	2020-10-02	QCB	IMPLANTABLE COLLAMER LENS (ICL)	Inadequacy of Device Shape and/or Size	Intraocular Pressure Increased	NA	NA	1	Event Description: THE REPORTER INDICATED THAT A 13.2MM, VTICMO13.2, -15.0/2.0/73 IMPLANTABLE COLLAMER LENS WAS IMPLANTED INTO THE PATIENTS LEFT EYE (OS) ON (B)(6) 2020. EXCESSIVE VAULT AND ELEVATED IOP WAS OBSERVED. IT WAS REPORTER THAT THE PROBLEM RESOLVED, REPORTER STATED " IOP WENT DOWN. LENS REMAINS IN THE EYE. PATIENT IS HAPPY." Manufacturer Narrative: THIS PRODUCT IS NOT MARKETED IN THE US…	Lens Retention	Resolved
https://www.accessdata.fda.gov/scripts/cdrh/cfdocs/cfMAUDE/Detail.CFM?MDRFOI__ID=10619517&pc=QCB	2023826-2020-02272	2020-09-01	Malfunction	STAAR SUGICAL COMPANY	2020-10-02	QCB	IMPLANTABLE COLLAMER LENS (ICL)	Inadequacy of Device Shape and/or Size	Intraocular Pressure Increased	NA	NA	1	Event Description: THE REPORTER INDICATED THAT A 13.2MM, VTICMO13.2, -14.5/2.0/102 IMPLANTABLE COLLAMER LENS WAS IMPLANTED INTO THE PATIENTS RIGHT EYE (OD) ON (B)(6) 2020. EXCESSIVE VAULT AND ELEVATED IOP WAS OBSERVED. IT WAS REPORTER THAT THE PROBLEM RESOLVED, REPORTER STATED " IOP WENT DOWN. LENS REMAINS IN THE EYE. PATIENT IS HAPPY." Manufacturer Narrative: THIS PRODUCT IS NOT MARKETED IN THE …	Lens Retention	Resolved
https://www.accessdata.fda.gov/scripts/cdrh/cfdocs/cfMAUDE/Detail.CFM?MDRFOI__ID=10138575&pc=QCB	2023826-2020-01183	2020-03-03 05:00:00	Injury	STAAR SURGICAL COMPANY	2020-06-10 04:00:00	QCB	IMPLANTABLE COLLAMER LENS (ICL)	Off-Label Use; Patient-Device Incompatibility	Intraocular Pressure Increased	N/A	NA	1	Event Description: THE REPORTER INDICATED THAT A 12.6MM, VTICH12.6, -3.00/2.5/082 (SPHERE/CYLINDER/AXIS), IMPLANTABLE COLLAMER LENS WAS IMPLANTED INTO THE PATIENT'S RIGHT EYE (OD) ON (B)(6) 2020. ELEVATED IOP (40 MMHG) WITHOUT PUPIL BLOCK AND ANGLE CLOSURE WERE OBSERVED ON (B)(6) 2020. ON (B)(6) 2020 THE LENS WAS REMOVED. CAUSE OF THE EVENT IS REPORTED AS PATIENT-RELATED FACTOR. PER THE REPORTER …	Lens Extraction	Resolved
https://www.accessdata.fda.gov/scripts/cdrh/cfdocs/cfMAUDE/Detail.CFM?MDRFOI__ID=10515444&pc=QCB	2023826-2020-02020	2020-04-16 04:00:00	Injury	STAAR SURGICAL COMPANY	2020-09-10 04:00:00	QCB	IMPLANTABLE COLLAMER LENS (ICL)	Inadequacy of Device Shape and/or Size	Intraocular Pressure Increased	N/A#S-P#N/A	NA	1	Event Description: THE REPORTER INDICATED THAT THE SURGEON IMPLANTED A 13.2MM VTICMO13.2, -7.50/1.5/081 (SPHERE/CYLINDER/AXIS), IMPLANTABLE COLLAMER LENS INTO THE PATIENT'S RIGHT EYE (OD) ON (B)(6) 2020. THE LENS WAS REMOVED AND REPLACED ON (B)(6) 2020 FOR A SHORTER LENGTH LENS DUE TO ELEVATED IOP (40MMHG) WITHOUR PUPIL BLOCK AND ANGLE CLOSURE OBSERVED ON (B)(6) 2020, AS WELL AS EXCESSIVE VAULT. …	Lens Exchange	Resolved
https://www.accessdata.fda.gov/scripts/cdrh/cfdocs/cfMAUDE/Detail.CFM?MDRFOI__ID=10537754&pc=QCB	2023826-2020-01978	2020-08-11 04:00:00	Injury	STAAR SURGICAL COMPANY	2020-09-15 04:00:00	QCB	IMPLANTABLE COLLAMER LENS (ICL)	Adverse Event Without Identified Device or Use Problem	Intraocular Pressure Increased	P030016	NA	1	Event Description: THE REPORTER INDICATED THE SURGEON IMPLANTED A 13.2MM TMICL13.2 IMPLANTABLE COLLAMER LENS, -16.00/+3.0/082 (SPHERE/CYLINDER/AXIS), IN THE PATIENTS RIGHT EYE (OD) ON (B)(6) 2020. THE LENS WAS EXPLANTED DUE TO ELEVATED INTRAOCULAR PRESSURE. THE LENS WAS LOST AND WILL NOT BE RETURNED. ADDITIONAL INFORMATION HAS BEEN REQUESTED BUT NONE HAS BEEN FORTHCOMING. IF ADDITIONAL INFORMATIO…	Lens Extraction	Unknown
https://www.accessdata.fda.gov/scripts/cdrh/cfdocs/cfMAUDE/Detail.CFM?MDRFOI__ID=10537776&pc=QCB	2023826-2020-01977	2020-08-11 04:00:00	Injury	STAAR SURGICAL COMPANY	2020-09-15 04:00:00	QCB	IMPLANTABLE COLLAMER LENS (ICL)	Adverse Event Without Identified Device or Use Problem	Intraocular Pressure Increased	P030016	NA	1	Event Description: THE REPORTER INDICATED THE SURGEON IMPLANTED A 13.2MM TMICL13.2 IMPLANTABLE COLLAMER LENS, -16.00/+3.0/076 (SPHERE/CYLINDER/AXIS), IN THE PATIENTS LEFT EYE (OS). THE LENS WAS EXPLANTED DUE TO ELEVATED INTRAOCULAR PRESSURE. ADDITIONAL INFORMATION HAS BEEN REQUESTED BUT NONE HAS BEEN FORTHCOMING. IF ADDITIONAL INFORMATION IS RECEIVED, A SUPPLEMENTAL MEDWATCH WILL BE SUBMITTED. Ma…	Lens Extraction	Unknown
https://www.accessdata.fda.gov/scripts/cdrh/cfdocs/cfMAUDE/Detail.CFM?MDRFOI__ID=10538983&pc=QCB	2023826-2020-02161	2020-08-10 04:00:00	Injury	STAAR SURGICAL COMPANY	2020-09-16 04:00:00	QCB	IMPLANTABLE COLLAMER LENS (ICL)	Inadequacy of Device Shape and/or Size	Intraocular Pressure Increased	NA	NA	1	Event Description: THE REPORTER INDICATED THAT A 13.2MM, VTICM5_13.2, -12.00/2.00/89 (SPHERE/CYLINDER/AXIS), IMPLANTABLE COLLAMER LENS WAS IMPLANTED INTO THE PATIENTS RIGHT EYE (OD) ON (B)(6) 2020. ON (B)(6) 2020 THE LENS WAS EXCHANGED FOR A SHORTER LENGTH LENS DUE TO EXCESSIVE VAULT AND ELEVATED IOP. THIS EXCHANGE RESOLVED THE PROBLEM. Manufacturer Narrative: ADDITIONAL INFORMATION: H3-DEVICE EV…	Lens Exchange	Resolved
https://www.accessdata.fda.gov/scripts/cdrh/cfdocs/cfMAUDE/Detail.CFM?MDRFOI__ID=10539564&pc=QCB	2023826-2020-02162	2020-08-10 04:00:00	Injury	STAAR SURGICAL COMPANY	2020-09-16 04:00:00	QCB	IMPLANTABLE COLLAMER LENS (ICL)	Inadequacy of Device Shape and/or Size	Intraocular Pressure Increased	NA	NA	1	Event Description: THE REPORTER INDICATED THAT A 13.2MM, VTICM5_13.2, -12.50/2.00/89 (SPHERE/CYLINDER/AXIS), IMPLANTABLE COLLAMER LENS WAS IMPLANTED INTO THE PATIENTS LEFT EYE (OS) ON (B)(6) 2020. ON (B)(6) 2020 THE LENS WAS EXCHANGED FOR A SHORTER LENGTH LENS DUE TO EXCESSIVE VAULT AND ELEVATED IOP. THIS EXCHANGE RESOLVED THE PROBLEM. Manufacturer Narrative: ADDITIONAL INFORMATION H3-DEVICE EVAL…	Lens Exchange	Resolved
https://www.accessdata.fda.gov/scripts/cdrh/cfdocs/cfMAUDE/Detail.CFM?MDRFOI__ID=10601013&pc=QCB	2023826-2020-02236	2020-06-30 04:00:00	Injury	STAAR SURGICAL COMPANY	2020-09-29 04:00:00	QCB	IMPLANTABLE COLLAMER LENS (ICL)	Inadequacy of Device Shape and/or Size	Intraocular Pressure Increased	N/A	NA	1	Event Description: THE REPORTER INDICATED THAT THE SURGEON IMPLANTED A 12.6MM VTICM5_12.6, -13.50/2.5/091 (SPHERE/CYLINDER/AXIS), IMPLANTABLE COLLAMER LENS INTO THE PATIENT'S RIGHT EYE (OD) ON (B)(6) 2020. THE LENS WAS REMOVED AND REPLACED ON (B)(6) 2020 FOR A SHORTER LENGTH LENS DUE TO EXCESSIVE VAULT AND ELEVATED IOP (18.5 MMHG) WITHOUT PUPIL BLOCK AND ANGLE CLOSURE BEING OBSERVED ON (B)(6) 202…	Lens Exchange	Resolved
https://www.accessdata.fda.gov/scripts/cdrh/cfdocs/cfMAUDE/Detail.CFM?MDRFOI__ID=10635478&pc=QCB	2023826-2020-02299	NA	Malfunction	STAAR SURGICAL COMPANY	2020-10-06	QCB	IMPLANTABLE COLLAMER LENS (ICL)	Misfocusing; Device Dislodged or Dislocated	Intraocular Pressure Increased	P030016	NA	1	Event Description: THE REPORTER INDICATED THAT A 13.2MM, TMICL13.2, -8.00/1.0/071 (SPHERE/CYLINDER/AXIS), IMPLANTABLE COLLAMER LENS WAS IMPLANTED INTO THE PATIENT'S LEFT EYE (OS) ON (B)(6) 2020. RESIDUAL REFTRACTIVE ERROR WAS OBSERVED AND ROTATION. LENS REMAINS IMPLANTED. PER THE REPORTER ON (B)(6) 2020, "IT DOES NOT SEEM LIKE THE LENS ROTATED FAR FROM PLANNED ORIENTATION, AND FURTHER ROTATION IS…	Lens Retention	Unknown
https://www.accessdata.fda.gov/scripts/cdrh/cfdocs/cfMAUDE/Detail.CFM?MDRFOI__ID=10635480&pc=QCB	2023826-2020-02298	NA	Malfunction	STAAR SURGICAL COMPANY	2020-10-06	QCB	IMPLANTABLE COLLAMER LENS (ICL)	Misfocusing; Device Dislodged or Dislocated	Intraocular Pressure Increased	P030016	NA	1	Event Description: THE REPORTER INDICATED THAT A 13.2MM, TMICL13.2, -8.00/1.0/109 (SPHERE/CYLINDER/AXIS), IMPLANTABLE COLLAMER LENS WAS IMPLANTED INTO THE PATIENT'S RIGHT EYE (OD) ON (B)(6) 2020. RESIDUAL REFTRACTIVE ERROR WAS OBSERVED AND ROTATION. LENS REMAINS IMPLANTED. PER THE REPORTER ON (B)(6) 2020, "IT DOES NOT SEEM LIKE THE LENS ROTATED FAR FROM PLANNED ORIENTATION, AND FURTHER ROTATION I…	Lens Retention	Unknown
https://www.accessdata.fda.gov/scripts/cdrh/cfdocs/cfMAUDE/Detail.CFM?MDRFOI__ID=11060109&pc=QCB	2023826-2020-03151	2020-07-04 04:00:00	Injury	STAAR SURGICAL COMPANY	2020-12-22 05:00:00	QCB	IMPLANTABLE COLLAMER LENS (ICL)	Adverse Event Without Identified Device or Use Problem	Intraocular Pressure Increased	NA	NA	1	Event Description: THE REPORTER INDICATED THAT THE SURGEON IMPLANTED A 12.1MM VTICM5_12.1 IMPLANTABLE COLLAMER LENS, -8.0/+2.0/089 (SPHERE/CYLINDER/AXIS), INTO THE PATIENT'S RIGHT EYE (OD) ON (B)(6) 2020. ON (B)(6) 2020 THE LENS WAS EXCHANGED WITH A SAME SIZE, DIFFERENT CYLINDER AND AXIS LENS DUE TO ELEVATED IOP. THE PROBLEM IS RESOLVED. Manufacturer Narrative: ADDITIONAL INFORMATION: H3-DEVICE E…	Lens Exchange	Resolved
https://www.accessdata.fda.gov/scripts/cdrh/cfdocs/cfMAUDE/Detail.CFM?MDRFOI__ID=11013551&pc=QCB	2023826-2020-02984	2020-09-28	Injury	STAAR SURGICAL COMPANY	2020-12-15	QCB	IMPLANTABLE COLLAMER LENS (ICL)	Off-Label Use; Adverse Event Without Identified Device or Use Problem	Intraocular Pressure Increased	NA#S-P#NA	NA	1	Event Description: THE REPORTER INDICATED THE SURGEON IMPLANTED A 13.2MM VTICM5_13.2 IMPLANTABLE COLLAMER LENS, -13.00/+2.0/094 (SPHERE/CYLINDER/AXIS), IN THE PATIENTS LEFT EYE (OS), ON (B)(6) 2020. A WEEK AFTER LENS WAS IMPLANTED, THERE WAS AN INTRAOCULAR PRESSURE SPIKE AND PATIENT WAS PRESCRIBED ALPHAGAN DROPS. TO DATE THE MEDICATION HAS BEEN TAPERED OFF AND LENS REMAINED IMPLANTED. THE PATIENT…	Lens Retention	Resolved
https://www.accessdata.fda.gov/scripts/cdrh/cfdocs/cfMAUDE/Detail.CFM?MDRFOI__ID=11013716&pc=QCB	2023826-2020-02983	2020-09-28	Injury	STAAR SURGICAL COMPANY	2020-12-15	QCB	IMPLANTABLE COLLAMER LENS (ICL)	Off-Label Use; Adverse Event Without Identified Device or Use Problem	Intraocular Pressure Increased	NA#S-P#NA	NA	1	Event Description: THE REPORTER INDICATED THE SURGEON IMPLANTED A 13.2MM VTICM5_13.2 IMPLANTABLE COLLAMER LENS, -13.50/+1.0/095 (SPHERE/CYLINDER/AXIS), IN THE PATIENTS RIGHT EYE (OD), ON (B)(6) 2020. A WEEK AFTER LENS WAS IMPLANTED, THERE WAS AN INTRAOCULAR PRESSURE SPIKE AND PATIENT WAS PRESCRIBED ALPHAGAN DROPS. TO DATE THE MEDICATION HAS BEEN TAPERED OFF AND LENS REMAINED IMPLANTED. THE PATIEN…	Lens Retention	Resolved
https://www.accessdata.fda.gov/scripts/cdrh/cfdocs/cfMAUDE/Detail.CFM?MDRFOI__ID=10851811&pc=QCB	2023826-2020-02665	2020-10-13 04:00:00	Injury	STAAR SURGICAL COMPANY	2020-11-17 05:00:00	QCB	IMPLANTABLE COLLAMER LENS (ICL)	Misfocusing; Inadequacy of Device Shape and/or Size; Patient-Device Incompatibility	Intraocular Pressure Increased	N/A	NA	1	Event Description: THE REPORTER INDICATED THAT A 13.2MM, VTICMO13.2, -15.50/4.0/088 (SPHERE/CYLINDER/AXIS), IMPLANTABLE COLLAMER LENS WAS IMPLANTED INTO THE PATIENT'S RIGHT EYE (OD) ON (B)(6) 2020. ELEVATED IOP (35MMHG) WITHOUT PUPIL BLOCK AND ANGLE CLOSURE WAS ASSESSED ON (B)(6) 2020. SIGNIFICANT REDUCTION OF IRIDO-CORNEAL ANGELS AND EXCESSIVE VAULT WERE OBSERVED, THE LENS WAS REMOVED ON (B)(6) …	Lens Extraction	Resolved
https://www.accessdata.fda.gov/scripts/cdrh/cfdocs/cfMAUDE/Detail.CFM?MDRFOI__ID=11135907&pc=QCB	2023826-2021-00040	2020-12-02 05:00:00	Injury	STAAR SURGICAL COMPANY	2021-01-07 05:00:00	QCB	IMPLANTABLE COLLAMER LENS (ICL)	Inadequacy of Device Shape and/or Size	Intraocular Pressure Increased	N/A	NA	1	Event Description: THE REPORTER INDICATED THE SURGEON IMPLANTED 13.2MM TMICL13.2 IMPLANTABLE COLLAMER LENS, -15.5/+4.0/082 (SPHERE/CYLINDER/AXIS), INTO THE PATIENTS LEFT EYE (OS) ON (B)(6) 2020. THE SURGEON REPORTS EXCESSIVE VAULT AND ELEVATED IOP, ENHANCED PIS AND ADMINISTRATION OF IOP DROPS AND DIAMOX. REPORTEDLY, THE LENS REMAINS IMPLANTED. Manufacturer Narrative: CLAIM# (B)(4). Manufacturer N…	Lens Exchange + Secondary Operation	Resolved
https://www.accessdata.fda.gov/scripts/cdrh/cfdocs/cfMAUDE/Detail.CFM?MDRFOI__ID=11169226&pc=QCB	2023826-2021-00069	2020-03-06 05:00:00	Malfunction	STAAR SURGICAL COMPANY	2021-01-14 05:00:00	QCB	IMPLANTABLE COLLAMER LENS (ICL)	Misfocusing	Intraocular Pressure Increased	N/A	NA	1	Event Description: THE REPORTER INDICATED THAT THE SURGEON IMPLANTED A 12.1 MM, TICML12.1, 14.00/3.0/086, IMPLANTABLE COLLAMER LENS, INTO THE PATIENT'S RIGHT EYE (OD). ACCOMMODATIVE SPASMS, REFRACTIVE CHANGE OVERTIME, AND FOGGY VISION WAS OBSERVED. LENS REMAINS IMPLANTED. CAUSE OF THE EVENT IS REPORTED AS UNKNOWN. REPORTEDLY, "AT (B)(6) 2020 VISIT, PATIENT VOICED COMPLAINT OF BLURRY VISION ONLY A…	Lens Retention	Not_Resolved
https://www.accessdata.fda.gov/scripts/cdrh/cfdocs/cfMAUDE/Detail.CFM?MDRFOI__ID=11175631&pc=QCB	2023826-2021-00141	2020-12-03 05:00:00	Injury	STAAR SURGICAL COMPANY	2021-01-14 05:00:00	QCB	IMPLANTABLE COLLAMER LENS (ICL)	Inadequacy of Device Shape and/or Size	Intraocular Pressure Increased	P030016	NA	1	Event Description: THE REPORTER INDICATED THAT A 13.2MM, TMICL13.2, -11.00/3.0/088 (SPHERE/CYLINDER/AXIS), IMPLANTABLE COLLAMER LENS WAS IMPLANTED INTO THE PATIENTS RIGHT EYE (OD) ON (B)(6) 2020. ON (B)(6) 2020 THE LENS WAS EXCHANGED FOR A SHORTER LENGTH LENS DUE TO EXCESSIVE VAULT AND ELEVATED IOP. THIS EXCHANGE RESOLVED THE PROBLEM. IN THE REPORTER OPINION THE CAUSE OF THIS EVENT WAS THE DEVICE…	Lens Exchange	Resolved
https://www.accessdata.fda.gov/scripts/cdrh/cfdocs/cfMAUDE/Detail.CFM?MDRFOI__ID=11206965&pc=QCB	2023826-2021-00109	2020-09-24 04:00:00	Injury	STAAR SURGICAL COMPANY	2021-01-21 05:00:00	QCB	IMPLANTABLE COLLAMER LENS (ICL)	Inadequacy of Device Shape and/or Size	Intraocular Pressure Increased	N/A	NA	1	Event Description: THE REPORTER INDICATED THAT THE SURGEON IMPLANTED A 13.2MM VTICM5_13.2, -9.00/2.5/87 (SPHERE/CYLINDER/AXIS), IMPLANTABLE COLLAMER LENS INTO THE PATIENT'S RIGHT EYE (OD) ON (B)(6) 2020. THE LENS WAS REMOVED ON (B)(6) 2020 FOR A SHORTER LENGTH LENS DUE TO EXCESSIVE VAULT AND ELEVATED IOP (29 MMHG) WITHOUT PUPIL BLOCK AND ANGLE CLOSURE ASSESSED ON (B)(6) 2020. THIS RESOLVED THE PR…	Lens Exchange	Resolved
https://www.accessdata.fda.gov/scripts/cdrh/cfdocs/cfMAUDE/Detail.CFM?MDRFOI__ID=11206967&pc=QCB	2023826-2021-00110	2020-09-24 04:00:00	Injury	STAAR SURGICAL COMPANY	2021-01-21 05:00:00	QCB	IMPLANTABLE COLLAMER LENS (ICL)	Inadequacy of Device Shape and/or Size	Intraocular Pressure Increased	N/A	NA	1	Event Description: THE REPORTER INDICATED THAT THE SURGEON IMPLANTED A 13.2MM VTICM5_13.2, -6.00/2.5/092 (SPHERE/CYLINDER/AXIS), IMPLANTABLE COLLAMER LENS INTO THE PATIENT'S LEFT EYE (OS) ON (B)(6) 2020. THE LENS WAS REMOVED ON (B)(6) 2020 FOR A SHORTER LENGTH LENS DUE TO EXCESSIVE VAULT AND ELEVATED IOP (22 MMHG) WITHOUT PUPIL BLOCK AND ANGLE CLOSURE ASSESSED ON (B)(6) 2020. THIS RESOLVED THE PR…	Lens Exchange	Resolved
https://www.accessdata.fda.gov/scripts/cdrh/cfdocs/cfMAUDE/Detail.CFM?MDRFOI__ID=11405310&pc=QCB	2023826-2021-00547	NA	Injury	STAAR SURGICAL COMPANY	2021-03-03 05:00:00	QCB	IMPLANTABLE COLLAMER LENS (ICL)	Adverse Event Without Identified Device or Use Problem	Intraocular Pressure Increased	P030016	NA	1	Event Description: THE REPORTER INDICATED THE SURGEON IMPLANTED A 13.2MM TMICL13.2 IMPLANTABLE COLLAMER LENS, -13.50/+1.0/074 (SPHERE/CYLINDER/AXIS), IN THE PATIENTS LEFT EYE (OS). THE LENS WAS EXPLANTED ON (B)(6) 2021 DUE TO A HIGH PRESSURE SPIKE. ADDITIONAL INFORMATION HAS BEEN REQUESTED BUT NONE HAS BEEN FORTHCOMING. IF ADDITIONAL INFORMATION IS RECEIVED, A SUPPLEMENTAL MEDWATCH WILL BE SUBMIT…	Lens Extraction	Unknown
https://www.accessdata.fda.gov/scripts/cdrh/cfdocs/cfMAUDE/Detail.CFM?MDRFOI__ID=11405316&pc=QCB	2023826-2021-00548	NA	Injury	STAAR SURGICAL COMPANY	2021-03-03 05:00:00	QCB	IMPLANTABLE COLLAMER LENS (ICL)	Adverse Event Without Identified Device or Use Problem	Intraocular Pressure Increased	P030016	NA	1	Event Description: THE REPORTER INDICATED THE SURGEON IMPLANTED A 13.2MM TMICL13.2 IMPLANTABLE COLLAMER LENS, -15.50/+2.0/111 (SPHERE/CYLINDER/AXIS), IN THE PATIENTS RIGHT EYE (OD). THE LENS WAS EXPLANTED ON (B)(6) 2021 DUE TO A HIGH PRESSURE SPIKE. ADDITIONAL INFORMATION HAS BEEN REQUESTED BUT NONE HAS BEEN FORTHCOMING. IF ADDITIONAL INFORMATION IS RECEIVED, A SUPPLEMENTAL MEDWATCH WILL BE SUBMI…	Lens Extraction	Unknown
https://www.accessdata.fda.gov/scripts/cdrh/cfdocs/cfMAUDE/Detail.CFM?MDRFOI__ID=11467925&pc=QCB	2023826-2021-00630	2021-02-08 05:00:00	Injury	STAAR SURGICAL COMPANY	2021-03-11 05:00:00	QCB	IMPLANTABLE COLLAMER LENS (ICL)	Inadequacy of Device Shape and/or Size	Intraocular Pressure Increased	NA	NA	1	Event Description: THE REPORTER INDICATED THAT A 13.7MM, VTICMO13.7, -15.50/2.0/093 (SPHERE/CYLINDER/AXIS), IMPLANTABLE COLLAMER LENS WAS IMPLANTED INTO THE PATIENTS RIGHT EYE (OD) ON (B)(6) 2020. ON (B)(6) 2021 THE LENS WAS EXPLANTED DUE TO ELEVATED IOP WITHOUT PUPIL BLOCK AND ANGLE CLOSURE. A REPLACEMENT LENS OF SHORTER LENGTH WAS LATER IMPLANTED. "LENGTH OF IMPLANT" WAS REPORTED AS CAUSE OF EV…	Lens Exchange	Unknown
https://www.accessdata.fda.gov/scripts/cdrh/cfdocs/cfMAUDE/Detail.CFM?MDRFOI__ID=11467943&pc=QCB	2023826-2021-00631	2021-02-08 05:00:00	Injury	STAAR SURGICAL COMPANY	2021-03-11 05:00:00	QCB	IMPLANTABLE COLLAMER LENS (ICL)	Inadequacy of Device Shape and/or Size	Intraocular Pressure Increased	NA	NA	1	Event Description: THE REPORTER INDICATED THAT A 13.7MM, VTICMO13.7, -14.50/2.0/086 (SPHERE/CYLINDER/AXIS), IMPLANTABLE COLLAMER LENS WAS IMPLANTED INTO THE PATIENTS LEFT EYE (OS) ON (B)(6) 2020. ON (B)(6) 2021 THE LENS WAS EXPLANTED DUE TO ELEVATED IOP WITHOUT PUPIL BLOCK AND ANGLE CLOSURE. A REPLACEMENT LENS OF SHORTER LENGTH WAS LATER IMPLANTED. "LENGTH OF IMPLANT" WAS REPORTED AS CAUSE OF EVE…	Lens Exchange	Resolved
https://www.accessdata.fda.gov/scripts/cdrh/cfdocs/cfMAUDE/Detail.CFM?MDRFOI__ID=11548140&pc=QCB	2023826-2021-00736	2021-02-25 05:00:00	Injury	STAAR SURGICAL COMPANY	2021-03-22 04:00:00	QCB	IMPLANTABLE COLLAMER LENS (ICL)	Off-Label Use; Inadequacy of Device Shape and/or Size	Intraocular Pressure Increased	P030016	NA	1	Event Description: THE REPORTER INDICATED THE SURGEON IMPLANTED A 13.2MM TMICL13.2 IMPLANTABLE COLLAMER LENS, -12.00/+2.0/088 (SPHERE/CYLINDER/AXIS), IN THE PATIENTS LEFT EYE (OS) ON (B)(6) 2021. THE LENS WAS EXPLANTED ON (B)(6) 2021 DUE TO EXCESSIVE VAULTING AND ELEVATED INTRAOCULAR PRESSURE. THE LENS WAS EXCHANGED FOR A SHORTER LENS AND THE PROBLEM WAS RESOLVED. THE PATIENT'S EYE IS STABLE. THE…	Lens Exchange	Resolved
https://www.accessdata.fda.gov/scripts/cdrh/cfdocs/cfMAUDE/Detail.CFM?MDRFOI__ID=11654112&pc=QCB	2023826-2021-00967	2021-02-12	Injury	STAAR SURGICAL COMPANY	2021-04-12	QCB	IMPLANTABLE COLLAMER LENS (ICL)	Inadequacy of Device Shape and/or Size	Intraocular Pressure Increased	NA	NA	1	Event Description: THE REPORTER INDICATED THAT THE SURGEON IMPLANTED A 13.2MM VTICMO13.2 IMPLANTABLE COLLAMER LENS, -15.5/+2.0/092 (SPHERE/CYLINDER/AXIS), INTO THE PATIENT'S RIGHT EYE (OD) ON (B)(6) 2021. ON (B)(6) 2021 THE LENS WAS EXCHANGED WITH A SHORTER LENGTH LENS DUE TO EXCESSIVE VAULT AND ELEVATED IOP. THE PROBLEM WAS RESOLVED. THE CAUSE OF THE EVENT IS REPORTED AS "OVER SIZE LENS." Manufa…	Lens Exchange	Resolved
https://www.accessdata.fda.gov/scripts/cdrh/cfdocs/cfMAUDE/Detail.CFM?MDRFOI__ID=11721500&pc=QCB	2023826-2021-01160	2020-10-13	Injury	STAAR SURGICAL COMPANY	2021-04-24	QCB	IMPLANTABLE COLLAMER LENS (ICL)	Inadequacy of Device Shape and/or Size	Intraocular Pressure Increased	NA	NA	1	Event Description: THE REPORTER INDICATED THE SURGEON IMPLANTED A 13.2MM VTICMO13.2 IMPLANTABLE COLLAMER LENS, -05.50/+1.0/075 (SPHERE/CYLINDER/AXIS), IN THE PATIENTS LEFT EYE (OS), ON (B)(6) 2020. THE LENS WAS EXPLANTED ON (B)(6) 2020 DUE TO EXCESSIVE VAULTING AND ELEVATED INTRAOCULAR PRESSURE (IOP). THE LENS WAS EXCHANGED FOR A SHORTER LENS AND THE PROBLEM WAS RESOLVED. Manufacturer Narrative: …	Lens Exchange	Resolved
https://www.accessdata.fda.gov/scripts/cdrh/cfdocs/cfMAUDE/Detail.CFM?MDRFOI__ID=11721925&pc=QCB	2023826-2021-01038	2021-02-23 05:00:00	Injury	STAAR SURGICAL COMPANY	2021-04-25 04:00:00	QCB	IMPLANTABLE COLLAMER LENS (ICL)	Inadequacy of Device Shape and/or Size	Intraocular Pressure Increased	P030016	NA	1	Event Description: THE REPORTER INDICATED THAT THE SURGEON IMPLANTED A 13.2MM TMICL13.2, -12/1.0/087 (SPHERE/CYLINDER/AXIS), IMPLANTABLE COLLAMER LENS INTO THE PATIENT'S LEFT EYE (OS) ON (B)(6) 2021. A NEW PI AND YAG WAS PERFORMED ON (B)(6) 2021. THE LENS WAS EXCHANGED WITH A SHORTER LENGTH LENS DUE TO EXCESSIVE VAULT AND PUPIL BLOCK WITH ELEVATED IOP(34MMHG ASSESSED ON (B)(6) 2021) ON (B)(6) 202…	Lens Exchange + Secondary Operation	Resolved
https://www.accessdata.fda.gov/scripts/cdrh/cfdocs/cfMAUDE/Detail.CFM?MDRFOI__ID=11822933&pc=QCB	2023826-2021-01437	2021-02-26	Injury	STAAR SURGICAL COMPANY	2021-05-13	QCB	IMPLANTABLE COLLAMER LENS (ICL)	Inadequacy of Device Shape and/or Size	Intraocular Pressure Increased	NA	NA	1	Event Description: THE REPORTER INDICATED THAT A 13.7MM ,VTICMO13.7, -14.50/0.50/146 (SPHERE/CYLINDER/AXIS), IMPLANTABLE COLLAMER LENS WAS IMPLANTED INTO THE PATIENTS RIGHT EYE (OD) ON (B)(6) 2020. ON (B)(6) 2021 THE LENS WAS EXPLANTED DUE TO EXCESSIVE VAULT AND ELEVATED IOP. A SHORTER LENGTH LENS WAS LATER IMPLANTED AND THE PROBLEM RESOLVED. CAUSE OF EVENT WAS REPORTED TO BE OTHER: " WRONG LENGT…	Lens Exchange	Resolved
https://www.accessdata.fda.gov/scripts/cdrh/cfdocs/cfMAUDE/Detail.CFM?MDRFOI__ID=12018124&pc=QCB	2023826-2021-01921	2020-12-15 05:00:00	Injury	STAAR SURGICAL COMPANY	2021-06-17 04:00:00	QCB	IMPLANTABLE COLLAMER LENS (ICL)	Adverse Event Without Identified Device or Use Problem	Intraocular Pressure Increased	P030016	NA	1	Event Description: THE REPORTER INDICATED THAT A 13.2MM, TMICL13.2, -14.5/2/089 (SPHERE/CYLINDER/AXIS), IMPLANTABLE COLLAMER LENS WAS IMPLANTED INTO THE PATIENTS RIGHT EYE (OD) ON (B)(6) 2020. THE PATIENT EXPERIENCED ELEVATED IOP. ADDITIONAL MEDICAL INTERVENTION (BROMINIDINE AND TIMOLOL) WAS NECESSARY. IT WAS REPORTED THAT THE PROBLEM RESOLVED. IN THE REPORTERS OPINION THE CAUSE OF THIS EVENT WAS…	Lens Retention	Resolved
https://www.accessdata.fda.gov/scripts/cdrh/cfdocs/cfMAUDE/Detail.CFM?MDRFOI__ID=12058246&pc=QCB	2023826-2021-02040	NA	Injury	STAAR SURGICAL COMPANY	2021-06-24 04:00:00	QCB	IMPLANTABLE COLLAMER LENS (ICL)	Adverse Event Without Identified Device or Use Problem	Intraocular Pressure Increased	P030016	NA	1	Event Description: THE REPORTER INDICATED THAT A 13.7MM, TMICL13.7, -13.00/1.5/085 (SPHERE/CYLINDER/AXIS), IMPLANTABLE COLLAMER LENS WAS IMPLANTED INTO THE PATIENTS LEFT EYE (OS) ON (B)(6) 2021. IT WAS REPORTED THAT THE PATIENT EXPERIENCED ELEVATED IOP. REPORTER STATED " SHE WAS SEEN IN THE ER MULTIPLE TIMES AND WAS PLACED ON GLAUCOMA DROPS. IT WAS REPORTED THAT THE LENS WAS REMOVED ON (B)(6) 202…	Lens Exchange	Unknown
https://www.accessdata.fda.gov/scripts/cdrh/cfdocs/cfMAUDE/Detail.CFM?MDRFOI__ID=12059229&pc=QCB	2023826-2021-02039	NA	Injury	STAAR SURGICAL COMPANY	2021-06-24 04:00:00	QCB	IMPLANTABLE COLLAMER LENS (ICL)	Adverse Event Without Identified Device or Use Problem	Intraocular Pressure Increased	P030016	NA	1	Event Description: THE REPORTER INDICATED THAT A 13.7MM, TMICL13.7, -12.00/2.0/091 (SPHERE/CYLINDER/AXIS), IMPLANTABLE COLLAMER LENS WAS IMPLANTED INTO THE PATIENTS RIGHT EYE (OD) ON (B)(6) 2021. IT WAS REPORTED THAT THE PATIENT EXPERIENCED ELEVATED IOP. REPORTER STATED " SHE WAS SEEN IN THE ER MULTIPLE TIMES AND WAS PLACED ON GLAUCOMA DROPS. IT WAS REPORTED THAT THE LENS WAS REMOVED ON (B)(6) 20…	Lens Exchange	Unknown
https://www.accessdata.fda.gov/scripts/cdrh/cfdocs/cfMAUDE/Detail.CFM?MDRFOI__ID=12072258&pc=QCB	2023826-2021-02069	2021-05-18 04:00:00	Injury	STAAR SURGICAL COMPANY	2021-06-25 04:00:00	QCB	IMPLANTABLE COLLAMER LENS	Adverse Event Without Identified Device or Use Problem	Intraocular Pressure Increased	P030016	NA	1	Event Description: THE REPORTER INDICATED THAT A 12.6MM TMICL12.6 IMPLANTABLE COLLAMER LENS, -13.0/+3.0/093 (SPHERE/CYLINDER/AXIS) WAS IMPLANTED INTO THE PATIENT'S EYE. REPORTEDLY, IT WAS REMOVED DUE TO ELEVATED IOP. ATTEMPTS TO OBTAIN ADDITIONAL INFORMATION HAVE NOT BEEN SUCCESSFUL. Manufacturer Narrative: B5: ADDITIONAL INFORMATION: A SHORTER LENS WAS IMPLANTED INTO THE PATIENT'S EYE AFTER THE …	Lens Exchange	Unknown
https://www.accessdata.fda.gov/scripts/cdrh/cfdocs/cfMAUDE/Detail.CFM?MDRFOI__ID=12097194&pc=QCB	2023826-2021-02208	2021-05-27	Injury	STAAR SURGICAL COMPANY	2021-06-30	QCB	IMPLANTABLE COLLAMER LENS (ICL)	Adverse Event Without Identified Device or Use Problem	Intraocular Pressure Increased	NA	NA	1	Event Description: THE REPORTER INDICATED THAT A 12.6MM, VTICH12.6, -6.5/1.5/074 (SPHERE/CYLINDER/AXIS), IMPLANTABLE COLLAMER LENS WAS IMPLANTED INTO THE PATIENTS LEFT EYE (OS) ON (B)(6) 2021. ON (B)(6) 2021 THE LENS WAS EXPLANTED DUE TO ELEVATED IOP AND THE PROBLEM RESOLVED. USER ERROR WAS THE CAUSE OF THIS EVENT, IT WAS REPORTED THAT PERIPHERAL IRRIDECTOMIES ARE MISSING. IF ADDITIONAL INFORMATI…	Lens Extraction	Unknown
https://www.accessdata.fda.gov/scripts/cdrh/cfdocs/cfMAUDE/Detail.CFM?MDRFOI__ID=12102434&pc=QCB	2023826-2021-02115	2021-06-04	Injury	STAAR SURGICAL COMPANY	2021-07-01	QCB	IMPLANTABLE COLLAMER LENS (ICL)	Misfocusing	Intraocular Pressure Increased	N/A	NA	1	Event Description: THE REPORTER INDICATED THAT A 13.2MM, VTICMO13.2, -18.00/6.0/105 (SPHERE/CYLINDER/AXIS), IMPLANTABLE COLLAMER LENS WAS IMPLANTED INTO THE PATIENT'S LEFT EYE (OS) ON (B)(6) 2021. TRANSIENT LOSS OF BCVA AND ELEVATED IOP (30MMHG) WITHOUT PUPIL BLOCK,ANGLE CLOSURE, AND PIGMENT DISPERSION, WAS OBSERVED. LENS REMAINS IMPLANTED. CAUSE OF THE EVENT IS REPORTED AS UNKNOWN. REPORTEDLY, P…	Lens Retention	Unknown
https://www.accessdata.fda.gov/scripts/cdrh/cfdocs/cfMAUDE/Detail.CFM?MDRFOI__ID=12150435&pc=QCB	2023826-2021-02532	2021-06-16	Injury	STAAR SURGICAL COMPANY	2021-07-12	QCB	IMPLANTABLE COLLAMER LENS (ICL)	Inadequacy of Device Shape and/or Size	Intraocular Pressure Increased	P030016	NA	1	Event Description: THE REPORTER INDICATED THE SURGEON IMPLANTED A 13.2MM TMICL13.2 IMPLANTABLE COLLAMER LENS, -11.00/+1.0/118 (SPHERE/CYLINDER/AXIS), IN THE PATIENTS RIGHT EYE (OD) ON (B)(6) 2021. THE LENS WAS REPORTED AS HAVING EXCESSIVE VAULTING WITH ELEVATED INTRAOCULAR PRESSURE (IOP). THE SURGEON DID SOME ADDITIONAL LASER SURGERY TO THE IRIDOTOMY (ENLARGED) AND THAT RESOLVED THE ISSUE. THE PA…	Lens Retention + Secondary Operation	Resolved
https://www.accessdata.fda.gov/scripts/cdrh/cfdocs/cfMAUDE/Detail.CFM?MDRFOI__ID=12203583&pc=QCB	2023826-2021-02557	2021-06-24 04:00:00	Injury	STAAR SURGICAL COMPANY	2021-07-21 04:00:00	QCB	IMPLANTABLE COLLAMER LENS (ICL)	Inadequacy of Device Shape and/or Size	Intraocular Pressure Increased	NA	NA	1	Event Description: THE REPORTER INDICATED THAT THE SURGEON IMPLANTED A 13.2MM TMICL13.2; -12.5/1.0/131 (SPHERE/CYLINDER/AXIS) IMPLANTABLE COLLAMER LENS INTO THE PATIENT'S RIGHT EYE (OD) ON (B)(6)2021. THE SURGEON REPORTS EXCESSIVE VAULTING AND ELEVATED INTRAOCULAR PRESSURE AND NOTED "EXCESSIVE VAULTING CAUSING ANGLES TO NARROW". LENS REMAINS IMPLANTED. THE CAUSE OF THE EVENT WAS REPORTED AS THE D…	Lens Retention + Secondary Operation	Resolved
https://www.accessdata.fda.gov/scripts/cdrh/cfdocs/cfMAUDE/Detail.CFM?MDRFOI__ID=12204759&pc=QCB	2023826-2021-02558	2021-06-24 04:00:00	Injury	STAAR SURGICAL COMPANY	2021-07-21 04:00:00	QCB	IMPLANTABLE COLLAMER LENS (ICL)	Inadequacy of Device Shape and/or Size	Intraocular Pressure Increased	NA	NA	1	Event Description: THE REPORTER INDICATED THAT THE SURGEON IMPLANTED A 13.2MM TMICL13.2; -17.0/2.5/076 (SPHERE/CYLINDER/AXIS) IMPLANTABLE COLLAMER LENS INTO THE PATIENT'S LEFT EYE (OS) ON (B)(6)2021. THE SURGEON REPORTS EXCESSIVE VAULTING AND ELEVATED INTRAOCULAR PRESSURE AND NOTED "EXCESSIVE VAULTING CAUSING ANGLES TO NARROW". LENS REMAINS IMPLANTED. THE CAUSE OF THE EVENT WAS REPORTED AS THE DE…	Lens Retention + Secondary Operation	Resolved
https://www.accessdata.fda.gov/scripts/cdrh/cfdocs/cfMAUDE/Detail.CFM?MDRFOI__ID=12214302&pc=QCB	2023826-2021-02675	2021-02-25	Injury	STAAR SURGICAL COMPANY	2021-07-22	QCB	IMPLANTABLE COLLAMER LENS (ICL)	Adverse Event Without Identified Device or Use Problem	Intraocular Pressure Increased	N/A	NA	1	Event Description: THE REPORTER INDICATED THAT A 13.2MM, TMICL13.2, -12.00/3.0/093 (SPHERE/CYLINDER/AXIS), IMPLANTABLE COLLAMER LENS WAS IMPLANTED INTO THE PATIENT'S RIGHT EYE (OD) ON (B)(6) 2021. ELEVATED IOP (45 MMHG) WITHOUT PUPIL BLOCK AND ANGLE CLOSURE WERE OBSERVED ON (B)(6) 2021. CONCOMITANT MEDICATIONS WERE PERSCRIBED. LENS REMAINS IMPLANTED. THIS RESOLVED THE PROBLEM. CAUSE OF THE EVENT …	Lens Retention	Resolved
https://www.accessdata.fda.gov/scripts/cdrh/cfdocs/cfMAUDE/Detail.CFM?MDRFOI__ID=12250513&pc=QCB	2023826-2021-02972	2021-05-20 04:00:00	Malfunction	STAAR SURGICAL COMPANY	2021-07-29 04:00:00	QCB	IMPLANTABLE COLLAMER LENS (ICL)	Adverse Event Without Identified Device or Use Problem	Intraocular Pressure Increased	NA	NA	1	Event Description: THE REPORTER INDICATED THE SURGEON INSERTED AND REMOVED A 13.2MM VTICMO13.2 IMPLANTABLE COLLAMER LENS, -16.50/+3.0/094 (SPHERE/CYLINDER/AXIS), WITHIN THE SAME SURGERY DUE TO THE LENS TORE DURING DELIVERY INTO THE PATIENTS LEFT EYE (OS). THERE WAS NO PATIENT INJURY. THE PATIENTS INTRAOCULAR PRESSURE WAS ELEVATED DURING THE SURGERY. THE LENS WAS REPLACED FOR ANOTHER SAME MODEL/LE…	Lens Exchange	Resolved
https://www.accessdata.fda.gov/scripts/cdrh/cfdocs/cfMAUDE/Detail.CFM?MDRFOI__ID=12308398&pc=QCB	2023826-2021-03083	2021-07-06	Injury	STAAR SURGICAL COMPANY	2021-08-11	QCB	IMPLANTABLE COLLAMER LENS (ICL)	Off-Label Use; Inadequacy of Device Shape and/or Size	Intraocular Pressure Increased	N/A	NA	1	Event Description: THE REPORTER INDICATED THAT THE SURGEON IMPLANTED A 13.2MM VTICMO13.2, -4.00/2.0/179 (SPHERE/CYLINDER/AXIS), IMPLANTABLE COLLAMER LENS INTO THE PATIENT'S RIGHT EYE (OD) ON (B)(6) 2021. THE LENS WAS REPLACED WITH A SHORTER LENGTH LENS DUE TO ELEVATED IOP (54MMHG) WITHOUT PUPIL BLOCK AND ANGLE CLOSURE (ASSESSED ON (B)(6) 2021) AND EXCESSIVE VAULT ON (B)(6) 2021. THIS RESOLVED THE…	Lens Exchange	Resolved
https://www.accessdata.fda.gov/scripts/cdrh/cfdocs/cfMAUDE/Detail.CFM?MDRFOI__ID=12308417&pc=QCB	2023826-2021-03084	2021-07-06	Injury	STAAR SURGICAL COMPANY	2021-08-11	QCB	IMPLANTABLE COLLAMER LENS (ICL)	Off-Label Use; Inadequacy of Device Shape and/or Size	Intraocular Pressure Increased	N/A	NA	1	Event Description: THE REPORTER INDICATED THAT THE SURGEON IMPLANTED A 13.2MM VTICMO13.2, -8.00/1.5/174 (SPHERE/CYLINDER/AXIS), IMPLANTABLE COLLAMER LENS INTO THE PATIENT'S LEFT EYE (OS) ON (B)(6) 2021. THE LENS WAS REPLACED WITH A SHORTER LENGTH LENS DUE TO ELEVATED IOP (60MMHG) WITHOUT PUPIL BLOCK AND ANGLE CLOSURE (ASSESED ON (B)(6) 2021) AND EXCESSIVE VAULT ON (B)(6) 2021. THIS RESOLVED THE P…	Lens Exchange	Resolved
https://www.accessdata.fda.gov/scripts/cdrh/cfdocs/cfMAUDE/Detail.CFM?MDRFOI__ID=12407186&pc=QCB	2023826-2021-03328	2021-06-20	Injury	STAAR SURGICAL COMPANY	2021-09-01	QCB	IMPLANTABLE COLLAMER LENS (ICL)	Inadequacy of Device Shape and/or Size	Intraocular Pressure Increased	N/A	NA	1	Event Description: THE REPORTER INDICATED THAT THE SURGEON IMPLANTED A 13.7MM VTICMO13.7, -12.00/1.5/093 (SPHERE/CYLINDER/AXIS), IMPLANTABLE COLLAMER LENS INTO THE PATIENT'S LEFT EYE (OS) ON (B)(6) 2021. THE LENS WAS REPLACED WITH A SHORTER LENGTH LENS DUE TO ELEVATED IOP(32MMHG) (B)(6) 2021. THIS RESOLVED THE PROBLEM. CAUSE OF THE EVENT IS REPORTED AS UNKNOWN. Manufacturer Narrative: THIS PRODUC…	Lens Exchange	Resolved
https://www.accessdata.fda.gov/scripts/cdrh/cfdocs/cfMAUDE/Detail.CFM?MDRFOI__ID=12510969&pc=QCB	2023826-2021-03705	2021-06-30 04:00:00	Injury	STAAR SURGICAL COMPANY	2021-09-21 04:00:00	QCB	IMPLANTABLE COLLAMER LENS (ICL)	Inadequacy of Device Shape and/or Size	Intraocular Pressure Increased	NA	NA	1	Event Description: THE REPORTER INDICATED THAT A 13.7MM, VTICM5_13.7, -8.00/1.00/22 (SPHERE/CYLINDER/AXIS), IMPLANTABLE COLLAMER LENS WAS IMPLANTED INTO THE PATIENTS RIGHT EYE (OD) ON (B)(6) 2021. ON (B)(6) 2021 THE LENS WAS EXPLANTED DUE TO EXCESSIVE VAULT AND ELEVATED IOP. IT WAS REPORTED THAT A REPLACEMENT LENS OF SHORTER LENGTH WAS LATER IMPLANTED AND THE PROBLEM RESOLVED. CAUSE OF EVENT WAS …	Lens Exchange	Resolved
https://www.accessdata.fda.gov/scripts/cdrh/cfdocs/cfMAUDE/Detail.CFM?MDRFOI__ID=12587047&pc=QCB	2023826-2021-03864	2021-08-05 04:00:00	Injury	STAAR SURGICAL COMPANY	2021-10-06 04:00:00	QCB	IMPLANTABLE COLLAMER LENS (ICL)	Inadequacy of Device Shape and/or Size	Intraocular Pressure Increased	NA	NA	1	Event Description: THE REPORTER INDICATED THE SURGEON IMPLANTED A 13.2MM VTICMO13.2 IMPLANTABLE COLLAMER LENS, -17.50/+3.0/091 (SPHERE/CYLINDER/AXIS) IN THE PATIENTS LEFT EYE (OS) ON (B)(6) 2021. THE LENS WAS EXPLANTED ON (B)(6) 2021 DUE TO ELEVATED INTRAOCULAR PRESSURE (IOP) AND EXCESSIVE VAULTING. IOP WAS STILL HIGH ON THE 1 AND 3 DAY FOLLOW-UP POST LENS REMOVAL. PATIENT IS RESPONDING TO ANTI-G…	Lens Extraction	Resolved
https://www.accessdata.fda.gov/scripts/cdrh/cfdocs/cfMAUDE/Detail.CFM?MDRFOI__ID=12587050&pc=QCB	2023826-2021-03863	2021-08-05 04:00:00	Injury	STAAR SURGICAL COMPANY	2021-10-06 04:00:00	QCB	IMPLANTABLE COLLAMER LENS (ICL)	Inadequacy of Device Shape and/or Size	Intraocular Pressure Increased	NA	NA	1	Event Description: THE REPORTER INDICATED THE SURGEON IMPLANTED A 13.2MM VTICMO13.2 IMPLANTABLE COLLAMER LENS, -16.00/+4.0/109 (SPHERE/CYLINDER/AXIS) IN THE PATIENTS RIGHT EYE (OD) ON (B)(6) 2021. THE LENS WAS EXPLANTED ON (B)(6) 2021 DUE TO ELEVATED INTRAOCULAR PRESSURE (IOP) AND LARGE VAULT. IOP WAS STILL HIGH ON THE 1 AND 3 DAY FOLLOW-UP POST LENS REMOVAL. PATIENT IS RESPONDING TO ANTI-GLAUCOM…	Lens Extraction	Resolved
https://www.accessdata.fda.gov/scripts/cdrh/cfdocs/cfMAUDE/Detail.CFM?MDRFOI__ID=12685440&pc=QCB	2023826-2021-04063	2021-09-27	Injury	STAAR SURGICAL COMPANY	2021-10-22	QCB	IMPLANTABLE COLLAMER LENS (ICL)	Inadequacy of Device Shape and/or Size	Intraocular Pressure Increased	NA	NA	1	Event Description: THE REPORTER INDICATED THAT THE SURGEON IMPLANTED A 12.6MM VTICMO12.6 IMPLANTABLE COLLAMER LENS, -15.0/+0.5/005 (SPHERE/CYLINDER/AXIS) INTO THE PATIENT'S RIGHT EYE (OD) ON (B)(6) 2021. ON THE SAME DATE IN A SEPARATE SURGERY THE LENS WAS EXPLANTED DUE TO ELEVATED IOP. THE PROBLEM WAS RESOLVED AFTER EXPLANT, NO FURTHER SURGICAL INTERVENTION IS PLANNED. THE CAUSE OF THE EVENT IS R…	Lens Extraction	Resolved
https://www.accessdata.fda.gov/scripts/cdrh/cfdocs/cfMAUDE/Detail.CFM?MDRFOI__ID=12685432&pc=QCB	2023826-2021-04062	2021-09-22 04:00:00	Injury	STAAR SURGICAL COMPANY	2021-10-22 04:00:00	QCB	IMPLANTABLE COLLAMER LENS (ICL)	Inadequacy of Device Shape and/or Size	Intraocular Pressure Increased	NA	NA	1	Event Description: THE REPORTER INDICATED THAT THE SURGEON IMPLANTED A 13.2MM VTICMO13.2 IMPLANTABLE COLLAMER LENS, -12.5/+0.5/092 (SPHERE/CYLINDER/AXIS) INTO THE PATIENT'S LEFT EYE (OS) ON (B)(6) 2021. ON (B)(6) 2021 THE LENS WAS EXPLANTED DUE TO EXCESSIVE VAULT AND ELEVATED IOP. THE CAUSE OF THE EVENT IS REPORTED AS UNKNOWN. REPORTEDLY THERE WAS NO REDUCTION OF IOP UNDER ORAL MEDICATION BY GLAU…	Lens Extraction	Resolved
https://www.accessdata.fda.gov/scripts/cdrh/cfdocs/cfMAUDE/Detail.CFM?MDRFOI__ID=12685468&pc=QCB	2023826-2021-04061	2021-09-22 04:00:00	Injury	STAAR SURGICAL COMPANY	2021-10-22 04:00:00	QCB	IMPLANTABLE COLLAMER LENS (ICL)	Inadequacy of Device Shape and/or Size	Intraocular Pressure Increased	NA	NA	1	Event Description: THE REPORTER INDICATED THAT THE SURGEON IMPLANTED A 13.2MM VTICMO13.2 IMPLANTABLE COLLAMER LENS, -15.0/+0.5/034 (SPHERE/CYLINDER/AXIS) INTO THE PATIENT'S RIGHT EYE (OD) ON (B)(6) 2021. ON (B)(6) 2021 THE LENS WAS EXPLANTED DUE TO EXCESSIVE VAULT AND ELEVATED IOP. THE CAUSE OF THE EVENT IS REPORTED AS UNKNOWN. REPORTEDLY THERE WAS NO REDUCTION OF IOP UNDER ORAL MEDICATION BY GLA…	Lens Extraction	Resolved
https://www.accessdata.fda.gov/scripts/cdrh/cfdocs/cfMAUDE/Detail.CFM?MDRFOI__ID=13014953&pc=QCB	2023826-2021-04810	2018-08-07 04:00:00	Injury	STAAR SURGICAL COMPANY	2021-12-15 05:00:00	QCB	IMPLANTABLE COLLAMER LENS (ICL)	Off-Label Use; Inadequacy of Device Shape and/or Size	Intraocular Pressure Increased	NA	NA	1	Event Description: THE REPORTER INDICATED THE SURGEON IMPLANTED A 13.2MM VTICMO13.2 IMPLANTABLE COLLAMER LENS, -05.00/+5.0/056 (SPHERE/CYLINDER/AXIS), IN THE PATIENTS LEFT EYE (OS) ON (B)(6) 2018. THE LENS WAS EXPLANTED ON (B)(6) 2019 DUE TO EXCESSIVE VAULTING AND ELEVATED INTRAOCULAR PRESSURE (IOP). THE SURGEON DID NOT IMPLANT ANOTHER ICL LENS. THE CAUSE OF THE EVENT WAS DUE TO PATIENT -RELATED …	Lens Extraction	Unknown
https://www.accessdata.fda.gov/scripts/cdrh/cfdocs/cfMAUDE/Detail.CFM?MDRFOI__ID=13054368&pc=QCB	2023826-2021-04738	2021-11-22 05:00:00	Injury	STAAR SURGICAL COMPANY	2021-12-21 05:00:00	QCB	IMPLANTABLE COLLAMER LENS (ICL)	Inadequacy of Device Shape and/or Size	Intraocular Pressure Increased	NA	NA	1	Event Description: THE REPORTER INDICATED THAT A 13.2MM VTICMO 13.2 IMPLANTABLE COLLAMER LENS OF -8.0/1.0/90 (SPHERE/CYLINDER/AXIS) WAS IMPLANTED INTO THE PATIENTS RIGHT EYE (OD) ON (B)(6) 2021. ON (B)(6) 2021 THE LENS WAS EXCHANGED FOR A SHORTER LENGTH LENS DUE TO EXCESSIVE VAULT AND ELEVATED IOP. THE EXCHANGE RESOLVED THE PROBLEM. CAUSE REPORTED AS UNKNOWN.Event Description: THE REPORTER INDICA…	Lens Exchange	Resolved
https://www.accessdata.fda.gov/scripts/cdrh/cfdocs/cfMAUDE/Detail.CFM?MDRFOI__ID=13065424&pc=QCB	2023826-2021-04743	2021-10-17 04:00:00	Injury	STAAR SURGICAL COMPANY	2021-12-22 05:00:00	QCB	IMPLANTABLE COLLAMER LENS (ICL)	Off-Label Use; Inadequacy of Device Shape and/or Size	Intraocular Pressure Increased	NA	NA	1	Event Description: THE REPORTER INDICATED THAT A 12.6MM VTICMO 12.6 IMPLANTABLE COLLAMER LENS OF -14.0/1.5/013 (SPHERE/CYLINDER/AXIS) WAS IMPLANTED INTO THE PATIENTS LEFT EYE (OS) ON (B)(6) 2021. ON (B)(6) 2021 THE LENS WAS EXCHANGED FOR A SHORTER LENGTH LENS DUE TO EXCESSIVE VAULT. THE PROBLEM WAS RESOLVED. CAUSE WAS REPORTED AS UNKNOWN. Manufacturer Narrative: D6: (B)(6) 2024. CLAIM # (B)(4). M…	Lens Exchange	Resolved
https://www.accessdata.fda.gov/scripts/cdrh/cfdocs/cfMAUDE/Detail.CFM?MDRFOI__ID=13115357&pc=QCB	2023826-2021-04768	2021-10-29 04:00:00	Injury	STAAR SURGICAL COMPANY	2021-12-29 05:00:00	QCB	IMPLANTABLE COLLAMER LENS (ICL)	Inadequacy of Device Shape and/or Size	Intraocular Pressure Increased	NA	NA	1	Event Description: THE REPORTER INDICATED THAT A 12.6MM VTICMO 12.6 IMPLANTABLE COLLAMER LENS OF -9.5/1.5/088 (SPHERE/CYLINDER/AXIS WAS IMPLANTED INTO THE PATIENTS RIGHT EYE (OD) ON (B)(6) 2021. ON (B)(6) 2021 THE LENS WAS EXCHANGED FOR A SHORTER LENGTH LENS DUE TO EXCESSIVE VAULT, AND THE PROBLEM WAS RESOLVED. CAUSE REPORTED AS UNKNOWN. Manufacturer Narrative: THIS PRODUCT IS NOT MARKETED IN THE…	Lens Exchange	Resolved
https://www.accessdata.fda.gov/scripts/cdrh/cfdocs/cfMAUDE/Detail.CFM?MDRFOI__ID=13256067&pc=QCB	2023826-2022-00117	2021-10-27 04:00:00	Injury	STAAR SURGICAL COMPANY	2022-01-13 05:00:00	QCB	IMPLANTABLE COLLAMER LENS (ICL)	Off-Label Use; Inadequacy of Device Shape and/or Size	Intraocular Pressure Increased	NA	NA	1	Event Description: THE REPORTER INDICATED THAT A 13.2MM VTICMO 13.2 IMPLANTABLE COLLAMER LENS OF -15.5/3.0/091 (SPHERE/ CYLINDER/ AXIS) WAS IMPLANTED INTO THE PATIENTS RIGHT EYE (OD) ON (B)(6) 2021. ON (B)(6) 2021 THE LENS WAS EXCHANGED FOR A SHORTER LENGTH LENS DUE TO EXCESSIVE VAULT. THE EXCHANGE RESOLVED THE PROBLEM. CAUSE IS REPORTED AS UNKNOWN. Manufacturer Narrative: THIS PRODUCT IS NOT MAR…	Lens Exchange	Resolved
https://www.accessdata.fda.gov/scripts/cdrh/cfdocs/cfMAUDE/Detail.CFM?MDRFOI__ID=13256668&pc=QCB	2023826-2022-00119	2021-11-05 04:00:00	Injury	STAAR SURGICAL COMPANY	2022-01-13 05:00:00	QCB	IMPLANTABLE COLLAMER LENS (ICL)	Inadequacy of Device Shape and/or Size	Intraocular Pressure Increased	NA	NA	1	Event Description: THE REPORTER INDICATED THAT A 13.2MM VTICMO 13.2 IMPLANTABLE COLLAMER LENS OF -13.5/2.0/093 (SPHERE/CYLINDER/AXIS) WAS IMPLANTED INTO THE PATIENTS RIGHT EYE (OD) ON (B)(6) 2021. ON (B)(6) 2021 THE LENS WAS EXCHANGED FOR A SHORTER LENGTH LENS DUE TO EXCESSIVE VAULT. THE EXCHANGE RESOLVED THE PROBLEM. CAUSE IS REPORTED AS UNKNOWN. Manufacturer Narrative: WEIGHT-ETHNICITY:UNK. PMA…	Lens Exchange	Resolved
https://www.accessdata.fda.gov/scripts/cdrh/cfdocs/cfMAUDE/Detail.CFM?MDRFOI__ID=13297269&pc=QCB	2023826-2022-00186	2021-11-02 04:00:00	Injury	STAAR SURGICAL COMPANY	2022-01-19 05:00:00	QCB	IMPLANTABLE COLLAMER LENS (ICL)	Adverse Event Without Identified Device or Use Problem	Intraocular Pressure Increased	NA	NA	1	Event Description: THE REPORTER INDICATED THE SURGEON IMPLANTED A 12.1MM VTICMO12.1 IMPLANTABLE COLLAMER LENS, -18.00/+2.0/091 (SPHERE/CYLINDER/AXIS), IN THE PATIENTS LEFT EYE (OS), ON (B)(6) 2021. THE LENS WAS EXPLANTED ON (B)(6) 2021 DUE TO ELEVATED INTRAOCULAR PRESSURE (IOP). ADDITIONAL SURGERY WAS PERFORMED, WITH THE ADDITION OF NEW PIS BY YAG BUT THE PROBLEM WAS NOT RESOLVED, SO THE LENS WAS…	Lens Exchange	Resolved
https://www.accessdata.fda.gov/scripts/cdrh/cfdocs/cfMAUDE/Detail.CFM?MDRFOI__ID=13297379&pc=QCB	2023826-2022-00185	2021-10-23 04:00:00	Injury	STAAR SURGICAL COMPANY	2022-01-19 05:00:00	QCB	IMPLANTABLE COLLAMER LENS (ICL)	Adverse Event Without Identified Device or Use Problem	Intraocular Pressure Increased	NA	NA	1	Event Description: THE REPORTER INDICATED THE SURGEON IMPLANTED A 12.6MM VTICMO12.6 IMPLANTABLE COLLAMER LENS, -18.00/+3.5/093 (SPHERE/CYLINDER/AXIS), IN THE PATIENTS LEFT EYE (OS), ON (B)(6) 2021. THE LENS WAS EXPLANTED ON (B)(6) 2021 DUE TO ELEVATED INTRAOCULAR PRESSURE (IOP). THE LENS WAS REPLACED WITH A SHORTER LENS BUT THE PROBLEM WAS NOT RESOLVED. THE IOP INCREASED CONTINUOUSLY AFTER OPERAT…	Lens Exchange	Not_Resolved
https://www.accessdata.fda.gov/scripts/cdrh/cfdocs/cfMAUDE/Detail.CFM?MDRFOI__ID=13297459&pc=QCB	2023826-2022-00184	2021-11-02 04:00:00	Injury	STAAR SURGICAL COMPANY	2022-01-19 05:00:00	QCB	IMPLANTABLE COLLAMER LENS (ICL)	Adverse Event Without Identified Device or Use Problem	Intraocular Pressure Increased	NA	NA	1	Event Description: THE REPORTER INDICATED THE SURGEON IMPLANTED A 12.1MM VTICMO12.1 IMPLANTABLE COLLAMER LENS, -17.00/+2.0/090 (SPHERE/CYLINDER/AXIS), IN THE PATIENTS RIGHT EYE (OD), ON (B)(6) 2021. THE LENS WAS EXPLANTED ON (B)(6) 2021 DUE TO ELEVATED INTRAOCULAR PRESSURE (IOP). ADDITIONAL SURGERY WAS PERFORMED ON (B)(6) 2021, WITH THE ADDITION OF NEW PIS BY YAG BUT THE PROBLEM WAS NOT RESOLVED,…	Lens Extraction	Resolved
https://www.accessdata.fda.gov/scripts/cdrh/cfdocs/cfMAUDE/Detail.CFM?MDRFOI__ID=13297565&pc=QCB	2023826-2022-00183	2021-10-31 04:00:00	Injury	STAAR SURGICAL COMPANY	2022-01-19 05:00:00	QCB	IMPLANTABLE COLLAMER LENS (ICL)	Adverse Event Without Identified Device or Use Problem	Intraocular Pressure Increased	NA	NA	1	Event Description: THE REPORTER INDICATED THE SURGEON IMPLANTED A 12.6MM VTICMO12.6 IMPLANTABLE COLLAMER LENS, -17.00/+2.0/090 (SPHERE/CYLINDER/AXIS), IN THE PATIENTS RIGHT EYE (OD), ON (B)(6) 2021. THE LENS WAS EXPLANTED ON (B)(6) 2021 DUE TO ELEVATED INTRAOCULAR PRESSURE (IOP). THE LENS WAS REPLACED WITH A SHORTER LENS BUT THE PROBLEM WAS NOT RESOLVED. THE IOP INCREASED CONTINUOUSLY AFTER OPERA…	Lens Exchange	Not_Resolved
https://www.accessdata.fda.gov/scripts/cdrh/cfdocs/cfMAUDE/Detail.CFM?MDRFOI__ID=13361414&pc=QCB	2023826-2022-00300	2021-11-23 05:00:00	Injury	STAAR SURGICAL COMPANY	2022-01-26 05:00:00	QCB	IMPLANTABLE COLLAMER LENS (ICL)	Inadequacy of Device Shape and/or Size	Intraocular Pressure Increased	NA	NA	1	Event Description: THE REPORTER INDICATED THAT A 12.1 VTICM5 12.1 IMPLANTABLE COLLAMER LENS OF -9.0/6.0/135 (SPHERE/CYLINDER/AXIS) WAS IMPLANTED INTO THE PATIENTS LEFT EYE (OS) ON (B)(6) 2021. ON (B)(6) 2021 THE LENS WAS EXCHANGED FOR A LONGER LENGTH LENS DUE TO LOW VAULT. THE EXCHANGE RESOLVED THE PROBLEM.Event Description: THE REPORTER INDICATED THAT A 12.1 VTICM5 12.1 IMPLANTABLE COLLAMER LENS…	Lens Exchange	Resolved
https://www.accessdata.fda.gov/scripts/cdrh/cfdocs/cfMAUDE/Detail.CFM?MDRFOI__ID=13423349&pc=QCB	2023826-2022-00253	2022-01-03 05:00:00	Injury	STAAR SURGICAL COMPANY	2022-02-02 05:00:00	QCB	IMPLANTABLE COLLAMER LENS (ICL)	Inadequacy of Device Shape and/or Size	Intraocular Pressure Increased	N/A	NA	1	Event Description: THE REPORTER INDICATED THAT THE SURGEON IMPLANTED A 13.2MM VTICM513.2, -11.00/1.5/089 (SPHERE/CYLINDER/AXIS), IMPLANTABLE COLLAMER LENS INTO THE PATIENT'S RIGHT EYE (OD) ON (B)(6) 2022. THE LENS WAS REPLACED WITH A SHORTER LENGTH LENS DUE TO ELEVATED IOP (28MMHG) WITHOUT PUPIL BLOCK AND ANGLE CLOSURE (ASSESSED 03/JAN/2022) EXCESSIVE VAULT ON (B)(6) 2022. THIS RESOLVED THE PROBL…	Lens Exchange	Resolved
https://www.accessdata.fda.gov/scripts/cdrh/cfdocs/cfMAUDE/Detail.CFM?MDRFOI__ID=13481675&pc=QCB	2023826-2022-00320	2021-12-21 05:00:00	Injury	STAAR SURGICAL COMPANY	2022-02-08 05:00:00	QCB	IMPLANTABLE COLLAMER LENS (ICL)	Inadequacy of Device Shape and/or Size	Intraocular Pressure Increased	NA	NA	1	Event Description: THE REPORTER INDICATED THAT A 12.1 VTICM5 12.1 IMPLANTABLE COLLAMER LENS OF -9.50/2.0/89 (SPHERE/CYLINDER/AXIS) WAS IMPLANTED INTO THE PATIENTS LEFT EYE (OS) ON (B)(6)2019. ON (B)(6) 2021 THE LENS WAS EXCHANGED FOR A LONGER LENGTH LENS DUE TO LOW VAULT. THE EXCHANGE RESOLVED THE PROBLEM. Manufacturer Narrative: WEIGHT, ETHNICITY, AND RACE:UNK. THIS PRODUCT IS NOT MARKETED IN TH…	Lens Exchange	Resolved
https://www.accessdata.fda.gov/scripts/cdrh/cfdocs/cfMAUDE/Detail.CFM?MDRFOI__ID=13509882&pc=QCB	2023826-2022-00333	2021-12-11 05:00:00	Injury	STAAR SURGICAL COMPANY	2022-02-10 05:00:00	QCB	IMPLANTABLE COLLAMER LENS (ICL)	Inadequacy of Device Shape and/or Size	Intraocular Pressure Increased	NA	NA	1	Event Description: THE REPORTER INDICATED THAT A 13.2MM VTICMO 13.2 IMPLANTABLE COLLAMER LENS OF -12.50/3.0/106 (SPHERE/CYLINDER/AXIS) WAS IMPLANTED INTO THE PATIENTS RIGHT EYE (OD) ON (B)(6) 2021. ON (B)(6) 2021 THE LENS WAS EXPLANTED AND ON THE SAME DAY DIFFERENT SURGERY A SHORTER LENGTH LENS WAS IMPLANTED DUE TO EXCESSIVE VAULT. THE REPLACEMENT LENS RESOLVED THE PROBLEM. CAUSE IS REPORTED AS U…	Lens Exchange	Resolved
https://www.accessdata.fda.gov/scripts/cdrh/cfdocs/cfMAUDE/Detail.CFM?MDRFOI__ID=13577875&pc=QCB	2023826-2022-00499	2021-11-12 05:00:00	Injury	STAAR SURGICAL COMPANY	2022-02-22 05:00:00	QCB	IMPLANTABLE COLLAMER LENS (ICL)	Inadequacy of Device Shape and/or Size	Intraocular Pressure Increased	N/A	NA	1	Event Description: THE REPORTER INDICATED THAT THE SURGEON IMPLANTED A 13.2MM VTICM5_13.2 -8.00/2.50/092 (SPHERE/CYLINDER/AXIS) IMPLANTABLE COLLAMER LENS INTO THE PATIENT'S RIGHT EYE (OD) ON (B)(6) 2021. THE LENS WAS REPLACED WITH A SHORTER LENGTH LENS DUE TO ELEVATED IOP (22MMHG) WITHOUT PUPIL BLOCK AND ANGLE CLOSURE(ASSESSED ON (B)(6) 2021) AND EXCESSIVE VAULT ON (B)(6) 2022. THIS RESOLVED THE …	Lens Exchange	Resolved
https://www.accessdata.fda.gov/scripts/cdrh/cfdocs/cfMAUDE/Detail.CFM?MDRFOI__ID=13577879&pc=QCB	2023826-2022-00500	2021-11-12 05:00:00	Injury	STAAR SURGICAL COMPANY	2022-02-22 05:00:00	QCB	IMPLANTABLE COLLAMER LENS (ICL)	Inadequacy of Device Shape and/or Size	Intraocular Pressure Increased	N/A	NA	1	Event Description: THE REPORTER INDICATED THAT THE SURGEON IMPLANTED A 13.2MM VTICM5_13.2 -6.00/1.50/090 (SPHERE/CYLINDER/AXIS) IMPLANTABLE COLLAMER LENS INTO THE PATIENT'S LEFT EYE (OS) ON (B)(6) 2021. THE LENS WAS REPLACED WITH A SHORTER LENGTH LENS DUE TO ELEVATED IOP (47MMHG) WITHOUT PUPIL BLOCK AND ANGLE CLOSURE(ASSESSED ON (B)(6) 2021) AND EXCESSIVE VAULT ON (B)(6) 2022. THIS RESOLVED THE P…	Lens Exchange	Resolved
https://www.accessdata.fda.gov/scripts/cdrh/cfdocs/cfMAUDE/Detail.CFM?MDRFOI__ID=13726672&pc=QCB	2023826-2022-00758	2021-11-20 05:00:00	Injury	STAAR SURGICAL COMPANY	2022-03-10 05:00:00	QCB	IMPLANTABLE COLLAMER LENS (ICL)	Inadequacy of Device Shape and/or Size	Intraocular Pressure Increased	NA	NA	1	Event Description: THE REPORTER INDICATED THE SURGEON IMPLANTED A 13.7MM VTICMO13.7 IMPLANTABLE COLLAMER LENS, -11.50/+1.5/110 (SPHERE/CYLINDER/AXIS), IN THE PATIENTS RIGHT EYE (OD), ON (B)(6) 2021. THE LENS WAS EXPLANTED ON (B)(6) 2022 DUE TO EXCESSIVE VAULTING AND ELEVATED INTRAOCULAR PRESSURE (IOP). THE LENS WAS REPLACED WITH A SHORTER LENS AND THE PROBLEM WAS RESOLVED. THE STATUS OF THE EYE I…	Lens Exchange	Resolved
https://www.accessdata.fda.gov/scripts/cdrh/cfdocs/cfMAUDE/Detail.CFM?MDRFOI__ID=13905945&pc=QCB	2023826-2022-00907	2022-02-24 05:00:00	Injury	STAAR SURGICAL COMPANY	2022-03-25 04:00:00	QCB	IMPLANTABLE COLLAMER LENS (ICL)	Inadequacy of Device Shape and/or Size	Intraocular Pressure Increased	NA	NA	1	Event Description: THE REPORTER INDICATED THAT THE SURGEON IMPLANTED A 13.7MM VTICM5_13.6; -6.00/+2.0/86 (SPHERE/CYLINDER/AXIS) IMPLANTABLE COLLAMER LENS INTO THE PATIENT'S RIGHT EYE (OD) ON (B)(6) 2022. THE PATIENT EXPERIENCED EXCESSIVE VAULTING WITH ELEVATED INTRAOCULAR PRESSURE. THE LENS WAS EXPLANTED ON (B)(6) 2022. THE CAUSE OF THE EVENT WAS REPORTED AS UNKNOWN. ATTEMPTS TO OBTAIN ADDITIONAL…	Lens Extraction	Resolved
https://www.accessdata.fda.gov/scripts/cdrh/cfdocs/cfMAUDE/Detail.CFM?MDRFOI__ID=14116520&pc=QCB	2023826-2022-01194	NA	Injury	STAAR SURGICAL COMPANY	2022-04-14 04:00:00	QCB	IMPLANTABLE COLLAMER LENS (ICL)	Inadequacy of Device Shape and/or Size	Intraocular Pressure Increased	NA	NA	1	Event Description: THE REPORTER INDICATED THAT A 13.7MM, VTICM5_13.7, -8.00/+1.0/098 (SPHERE/CYLINDER/AXIS), IMPLANTABLE COLLAMER LENS WAS IMPLANTED INTO THE PATIENTS RIGHT EYE (OD) ON (B)(6) 2021. ON (B)(6) 2022 THE LENS WAS EXPLANTED DUE TO EXCESSIVE VAULT AND ELEVATED INTRAOCULAR PRESSURE. THE EXPLANT RESOLVED THE PROBLEM. IN THE REPORTERS OPINION THE CAUSE OF THE EVENT WAS THE DEVICE AND PATI…	Lens Extraction	Resolved
https://www.accessdata.fda.gov/scripts/cdrh/cfdocs/cfMAUDE/Detail.CFM?MDRFOI__ID=14282382&pc=QCB	2023826-2022-01213	2022-03-01 05:00:00	Injury	STAAR SURGICAL COMPANY	2022-05-04 04:00:00	QCB	IMPLANTABLE COLLAMER LENS (ICL)	Off-Label Use	Intraocular Pressure Increased	NA	NA	1	Event Description: THE REPORTER INDICATED THAT A 12.6MM VTICMO 12.6 IMPLANTABLE COLLAMER LENS OF -11.50/1.5/092 (SPHERE/CYLINDER/AXIS) WAS IMPLANTED INTO THE PATIENTS LEFT EYE (OS) ON (B)(6) 2022. ELEVATED IOP WAS OBSERVED. ON (B)(6) 2022 THE LENS EXPLANTED AND THE PROBLEM WAS RESOLVED. CAUSE REPORTED AS PATIENT RELATED FACTOR. "PATIENT WITH ABNORMAL CILIARY BODY MORPHOLOGY AND NARROWING OF THE A…	Lens Extraction	Resolved
https://www.accessdata.fda.gov/scripts/cdrh/cfdocs/cfMAUDE/Detail.CFM?MDRFOI__ID=14282387&pc=QCB	2023826-2022-01212	2022-03-07 05:00:00	Injury	STAAR SURGICAL COMPANY	2022-05-04 04:00:00	QCB	IMPLANTABLE COLLAMER LENS (ICL)	Off-Label Use	Intraocular Pressure Increased	NA	NA	1	Event Description: THE REPORTER INDICATED THAT A 12.6MM VTICMO 12.6 IMPLANTABLE COLLAMER LENS OF -11.50/1.5/092 (SPHERE/CYLINDER/AXIS) WAS IMPLANTED INTO THE PATIENTS RIGHT EYE (OD) ON (B)(6) 2022. ELEVATED IOP WAS OBSERVED. ON (B)(6) 2022 THE LENS EXPLANTED AND THE PROBLEM WAS RESOLVED. CAUSE REPORTED AS PATIENT RELATED FACTOR. "PATIENT WITH ABNORMAL CILIARY BODY MORPHOLOGY AND NARROWING OF THE …	Lens Extraction	Resolved
https://www.accessdata.fda.gov/scripts/cdrh/cfdocs/cfMAUDE/Detail.CFM?MDRFOI__ID=14403295&pc=QCB	2023826-2022-01524	NA	Injury	STAAR SURGICAL COMPANY	2022-05-14 04:00:00	QCB	IMPLANTABLE COLLAMER LENS (ICL)	Inadequacy of Device Shape and/or Size	Intraocular Pressure Increased	NA	NA	1	Event Description: THE REPORTER INDICATED THAT A 12.6MM TMICL 12.6 IMPLANTABLE COLLAMER LENS OF -12.0/2.0/087 (SPHERE/CYLINDER/AXIS) WAS IMPLANTED INTO THE PATIENT'S RIGHT EYE (OD) ON (B)(6) 2022. EXCESSIVE VAULT AND ELEVATED IOP WAS OBSERVED. ON (B)(6) 2022 THE LENS WAS REMOVED AND ON THE SAME DAY A REPLACEMENT LENS OF SPHERICAL AND SHORTER LENGTH WAS IMPLANTED. THE REPLACEMENT LENS DID NOT RESO…	Lens Exchange	Not_Resolved
https://www.accessdata.fda.gov/scripts/cdrh/cfdocs/cfMAUDE/Detail.CFM?MDRFOI__ID=14403301&pc=QCB	2023826-2022-01525	NA	Injury	STAAR SURGICAL COMPANY	2022-05-14 04:00:00	QCB	IMPLANTABLE COLLAMER LENS (ICL)	Inadequacy of Device Shape and/or Size	Intraocular Pressure Increased	NA	NA	1	Event Description: THE REPORTER INDICATED THAT A 12.6MM TMICL 12.6 IMPLANTABLE COLLAMER LENS OF -12.0/1.5/111(SPHERE/CYLINDER/AXIS) WAS IMPLANTED INTO THE PATIENT'S LEFT EYE (OS) ON (B)(6) 2022. EXCESSIVE VAULT AND ELEVATED IOP WAS OBSERVED. ON (B)(6) 2022 THE LENS WAS REMOVED. A REPLACEMENT LENS WAS LATER IMPLANTED WITH A SPHERICAL MODEL AND SHORTER LENGTH. THE REPLACEMENT LENS DID NOT RESOLVE T…	Lens Exchange	Not_Resolved
https://www.accessdata.fda.gov/scripts/cdrh/cfdocs/cfMAUDE/Detail.CFM?MDRFOI__ID=14632891&pc=QCB	2023826-2022-01661	2022-02-16 05:00:00	Malfunction	STAAR SURGICAL COMPANY	2022-06-08 04:00:00	QCB	IMPLANTABLE COLLAMER LENS (ICL)	Inadequacy of Device Shape and/or Size	Intraocular Pressure Increased	P030016	NA	1	Event Description: THE REPORTER INDICATED THAT A 13.2MM VTICM513.2, -9.0/4.0/090 (SPHERE/CYLINDER/AXIS), IMPLANTABLE COLLAMER LENS WAS IMPLANTED AND REPLACED INTRAOPERATIVELY WITH A SHORTER LENGTH LENS ON (B)(6) 2022 FROM PATIENT'S RIGHT EYE (OD) DUE TO EXCESSIVE VAULT.THIS RESOLVED THE PROBLEM. CAUSE OF THE EVENT IS REPORTED AS DEVICE, LENS WAS NOT PROPERLY SIZED. Manufacturer Narrative: (B)(4).	Lens Exchange	Resolved
https://www.accessdata.fda.gov/scripts/cdrh/cfdocs/cfMAUDE/Detail.CFM?MDRFOI__ID=14687899&pc=QCB	2023826-2022-01855	2022-02-14 05:00:00	Injury	STAAR SURGICAL COMPANY	2022-06-14 04:00:00	QCB	IMPLANTABLE COLLAMER LENS (ICL)	Off-Label Use; Inadequacy of Device Shape and/or Size	Intraocular Pressure Increased	P030016	NA	1	Event Description: THE REPORTER INDICATED THAT THE SURGEON IMPLANTED A 12.6MM VTICMO12.6; -8.5/1.5/079 (SPHERE/CYLINDER/AXIS) IMPLANTABLE COLLAMER LENS INTO THE PATIENT'S LEFT EYE (OS) ON (B)(6) 2022. THE PATIENT EXPERIENCED EXCESSIVE VAULTING AND ELEVATED INTRAOCULAR PRESSURE. LATER ON THE SAME DATE IN A SECOND SURGERY THE LENS WAS EXPLANTED AND NOTED "THE PATIENT WOULDN'T IMPLANTED WITH THE LEN…	Lens Extraction	Resolved
https://www.accessdata.fda.gov/scripts/cdrh/cfdocs/cfMAUDE/Detail.CFM?MDRFOI__ID=14829910&pc=QCB	2023826-2022-01877	2022-01-20 05:00:00	Malfunction	STAAR SURGICAL COMPANY	2022-06-27 04:00:00	QCB	IMPLANTABLE COLLAMER LENS (ICL)	Inadequacy of Device Shape and/or Size	Intraocular Pressure Increased	P030016	NA	1	Event Description: THE REPORTER INDICATED THAT A 12.6MM VTICM512.6, -5.50/1.0/090 (SPHERE/CYLINDER/AXIS), IMPLANTABLE COLLAMER LENS WAS IMPLANTED, REMOVED, AND REPLACED INTRAOPERATIVELY WITH A SHORTER LENGTH LENS ON (B)(6) 2022 FROM PATIENT'S RIGHT EYE (OD) DUE TO EXCESSIVE VAULT. THIS RESOLVED THE PROBLEM. CAUSE OF THE EVENT IS REPORTED AS UNKNOWN. Manufacturer Narrative: WEIGHT: UNK. ETHNICITY:…	Lens Exchange	Resolved
https://www.accessdata.fda.gov/scripts/cdrh/cfdocs/cfMAUDE/Detail.CFM?MDRFOI__ID=14829913&pc=QCB	2023826-2022-01878	2022-01-20 05:00:00	Malfunction	STAAR SURGICAL COMPANY	2022-06-27 04:00:00	QCB	IMPLANTABLE COLLAMER LENS (ICL)	Inadequacy of Device Shape and/or Size	Intraocular Pressure Increased	P030016	NA	1	Event Description: THE REPORTER INDICATED THAT A 12.6MM VTICM512.6, -5.50/1.0/085 (SPHERE/CYLINDER/AXIS), IMPLANTABLE COLLAMER LENS WAS IMPLANTED, REMOVED, AND REPLACED INTRAOPERATIVELY WITH A SHORTER LENGTH LENS ON (B)(6) 2022 FROM PATIENT'S LEFT EYE (OS) DUE TO EXCESSIVE VAULT. THIS RESOLVED THE PROBLEM. CAUSE OF THE EVENT IS REPORTED AS UNKNOWN. Manufacturer Narrative: WEIGHT: UNK. ETHNICITY: …	Lens Exchange	Resolved
https://www.accessdata.fda.gov/scripts/cdrh/cfdocs/cfMAUDE/Detail.CFM?MDRFOI__ID=14983249&pc=QCB	2023826-2022-02206	2022-06-04 04:00:00	Injury	STAAR SURGICAL COMPANY	2022-07-11 04:00:00	QCB	IMPLANTABLE COLLAMER LENS (ICL)	Off-Label Use; Inadequacy of Device Shape and/or Size	Intraocular Pressure Increased	P030016	NA	1	Event Description: THE REPORTER INDICATED THAT THE SURGEON IMPLANTED A 12.6MM VTICMO12.6; -11.5/3.0/091 (SPHERE/CYLINDER/AXIS) IMPLANTABLE COLLAMER LENS INTO THE PATIENT'S RIGHT EYE (OD) ON (B)(6) 2022. THE PATIENT EXPERIENCED EXCESSIVE VAULTING AND ELEVATED IOP WITHOUT PUPIL BLOCK AND ANGLE CLOSURE. ON THE SAME DATE IN A SEPARATE SURGERY THE LENS WAS EXPLANTED. IT WAS NOTED "THE PATIENT IS UNDER…	Lens Extraction	Resolved
https://www.accessdata.fda.gov/scripts/cdrh/cfdocs/cfMAUDE/Detail.CFM?MDRFOI__ID=15042197&pc=QCB	2023826-2022-02165	2022-02-02 05:00:00	Malfunction	STAAR SURGICAL COMPANY	2022-07-18 04:00:00	QCB	IMPLANTABLE COLLAMER LENS (ICL)	Inadequacy of Device Shape and/or Size	Intraocular Pressure Increased	P030016	NA	1	Event Description: THE REPORTER INDICATED THAT A 12.6MM VTICM512.6, -10.5/3.0/077 (SPHERE/CYLINDER/AXIS), IMPLANTABLE COLLAMER LENS WAS IMPLANTED, REMOVED, AND REPLACED INTRAOPERATIVELY WITH A SHORTER LENGTH LENS ON (B)(6) 2022 FROM PATIENT'S LEFT EYE (OS) DUE TO EXCESSIVE VAULT.THIS RESOLVED THE PROBLEM. CAUSE OF THE EVENT IS REPORTED AS UNKNOWN. Manufacturer Narrative: WEIGHT - UNK,_x000D_ ETHN…	Lens Exchange	Resolved
https://www.accessdata.fda.gov/scripts/cdrh/cfdocs/cfMAUDE/Detail.CFM?MDRFOI__ID=15117753&pc=QCB	2023826-2022-02455	2022-05-24 04:00:00	Injury	STAAR SURGICAL COMPANY	2022-07-27 04:00:00	QCB	IMPLANTABLE COLLAMER LENS (ICL)	Inadequacy of Device Shape and/or Size	Intraocular Pressure Increased	P030016	NA	1	Event Description: THE REPORTER INDICATED THE SURGEON IMPLANTED A 13.2MM TMICL13.2 IMPLANTABLE COLLAMER LENS, -12.00/+1.5/129 (SPHERE/CYLINDER/AXIS), IN THE PATIENTS RIGHT EYE (OD) ON (B)(6) 2022. THE LENS WAS EXPLANTED ON (B)(6) 2022 DUE TO EXCESSIVE VAULTING AND ELEVATED INTRAOCULAR PRESSURE (IOP) (STEROID RESPONDER). THE LENS WAS REPLACED WITH A SHORTER LENS AND THE PROBLEM WAS RESOLVED. POST-…	Lens Exchange	Resolved
https://www.accessdata.fda.gov/scripts/cdrh/cfdocs/cfMAUDE/Detail.CFM?MDRFOI__ID=15136362&pc=QCB	2023826-2022-02502	2022-05-26 04:00:00	Injury	STAAR SURGICAL COMPANY	2022-07-29 04:00:00	QCB	IMPLANTABLE COLLAMER LENS (ICL)	Inadequacy of Device Shape and/or Size	Intraocular Pressure Increased	P030016	NA	1	Event Description: THE REPORTER INDICATED THAT A 12.6 MM VTICM5 12.6 IMPLANTABLE COLLAMER LENS OF -5.0/3.0/91 (SPHERE/CYLINDER/AXIS) WAS IMPLANTED INTO THE PATIENT'S LEFT EYE (OS) ON (B)(6) 2022. ON (B)(6) 2022 THE LENS WAS EXPLANTED DUE TO EXCESSIVE VAULT AND THE PROBLEM WAS RESOLVED. CAUSE REPORTED AS HIGH IOP. Manufacturer Narrative: CLAIM # (B)(4). Manufacturer Narrative: DEVICE EVALUATION: H…	Lens Extraction	Resolved
https://www.accessdata.fda.gov/scripts/cdrh/cfdocs/cfMAUDE/Detail.CFM?MDRFOI__ID=15567405&pc=QCB	2023826-2022-03565	2022-02-28 05:00:00	Injury	STAAR SURGICAL COMPANY	2022-10-07 04:00:00	QCB	IMPLANTABLE COLLAMER LENS (ICL)	Off-Label Use; Device Dislodged or Dislocated	Intraocular Pressure Increased	P030016	NA	1	Event Description: THE REPORTER INDICATED THAT A 12.6MM VTICMO12.6 IMPLANTABLE COLLAMER LENS OF -17.0/3.0/093 (SPHERE/CYLINDER/AXIS) WAS IMPLANTED INTO THE PATIENT'S LEFT EYE (OS) ON (B)(6) 2022. ON (B)(6) 2022 THE LENS WAS EXPLANTED DUE TO LENS ROTATION NOT ASSOCIATED TO A LOW VAULT . THE LENS WAS LATER REPLACED WITH A SPHERICAL LENS OF THE SAME LENGTH DIFFERENT POWER AND THE PROBLEM RESOLVED. F…	Lens Exchange + Secondary Operation	Resolved
https://www.accessdata.fda.gov/scripts/cdrh/cfdocs/cfMAUDE/Detail.CFM?MDRFOI__ID=15801805&pc=QCB	2023826-2022-04085	2022-10-13 04:00:00	Injury	STAAR SURGICAL COMPANY	2022-11-15 05:00:00	QCB	IMPLANTABLE COLLAMER LENS (ICL)	Adverse Event Without Identified Device or Use Problem	Intraocular Pressure Increased	P030016	NA	1	Event Description: THE REPORTER INDICATED THE SURGEON IMPLANTED A 12.6MM VTICM5_12.6 IMPLANTABLE COLLAMER LENS, -11.50/+2.0/093 (SPHERE/CYLINDER/AXIS), IN THE PATIENTS LEFT EYE (OS) ON (B)(6) 2022. THE INTRAOCULAR PRESSURE (IOP) WAS REPORTED AS BEING ELEVATED AND COMBIGAN BID AND PRED FORTE BID WERE INITIATED. THE ELEVATED IOP WAS RESOLVED AND WAS MEASURED WITHIN NORMAL RANGE ON (B)(6) 2022. THE …	Lens Retention	Resolved
https://www.accessdata.fda.gov/scripts/cdrh/cfdocs/cfMAUDE/Detail.CFM?MDRFOI__ID=15811021&pc=QCB	2023826-2022-03961	2022-10-07 04:00:00	Injury	STAAR SURGICAL COMPANY	2022-11-16 05:00:00	QCB	IMPLANTABLE COLLAMER LENS (ICL)	Adverse Event Without Identified Device or Use Problem	Intraocular Pressure Increased	P030016	NA	1	Event Description: THE REPORTER INDICATED THAT A 12.6MM VTICMO12.6 IMPLANTABLE COLLAMER LENS OF -18.00/2.5/057(SPHERE/CYLINDER/AXIS) WAS IMPLANTED INTO THE PATIENT'S LEFT EYE (OS) ON (B)(6) 2022. ON (B)(6) 2022, THE LENS WAS EXPLANTED DUE TO ELEVATED IOP WITHOUT PUPIL BLOCK AND ANGLE CLOSURE. CAUSE OF THE EVENT IS THE DEVICE. THE REPORTER STATED THAT THE LENS WAS, "OVERSIZED." THE PROBLEM IS NOT …	Lens Extraction	Not_Resolved
https://www.accessdata.fda.gov/scripts/cdrh/cfdocs/cfMAUDE/Detail.CFM?MDRFOI__ID=15903005&pc=QCB	2023826-2022-04235	2022-07-28 04:00:00	Injury	STAAR SURGICAL COMPANY	2022-12-02 05:00:00	QCB	IMPLANTABLE COLLAMER LENS (ICL)	Off-Label Use; Adverse Event Without Identified Device or Use Problem	Intraocular Pressure Increased	P030016	NA	1	Event Description: THE REPORTER INDICATED THAT A 13.2MM VTICMO13.2 IMPLANTABLE COLLAMER LENS OF -14.0/2.0/076 (SPHERE/CYLINDER/AXIS) WAS IMPLANTED INTO THE PATIENT'S LEFT EYE (OS) ON (B)(6) 2022. ON (B)(6) 2022, THE LENS WAS REMOVED DUE TO ELEVATED IOP. THE PROBLEM WAS RESOLVED. CAUSE OF THE EVENT IS UNKNOWN. REPORTEDLY, "2 MONTHS AFTER THE OPERATION, THE IOP HAS BEEN BETWEEN 26-29 MMHG, THE PATI…	Lens Extraction	Resolved
https://www.accessdata.fda.gov/scripts/cdrh/cfdocs/cfMAUDE/Detail.CFM?MDRFOI__ID=15903054&pc=QCB	2023826-2022-04234	2022-07-28 04:00:00	Injury	STAAR SURGICAL COMPANY	2022-12-02 05:00:00	QCB	IMPLANTABLE COLLAMER LENS (ICL)	Off-Label Use; Adverse Event Without Identified Device or Use Problem	Intraocular Pressure Increased	P030016	NA	1	Event Description: THE REPORTER INDICATED THAT A 13.2MM VTICMO13.2 IMPLANTABLE COLLAMER LENS OF -13.5/1.5/111 (SPHERE/CYLINDER/AXIS) WAS IMPLANTED INTO THE RIGHT EYE (OD) OF A PATIENT WITH PRE-EXISTING PRIMARY OPEN ANGLE OR NARROW ANGLE GLAUCOMA ON (B)(6) 2022. ON (B)(6) 2022, THE LENS WAS REMOVED DUE TO ELEVATED IOP. THE PROBLEM WAS RESOLVED. CAUSE OF THE EVENT IS UNKNOWN. REPORTEDLY, "2 MONTHS …	Lens Extraction	Resolved
https://www.accessdata.fda.gov/scripts/cdrh/cfdocs/cfMAUDE/Detail.CFM?MDRFOI__ID=16000610&pc=QCB	2023826-2022-04626	2022-08-31 04:00:00	Injury	STAAR SURGICAL COMPANY	2022-12-16 05:00:00	QCB	IMPLANTABLE COLLAMER LENS (ICL)	Off-Label Use; Adverse Event Without Identified Device or Use Problem	Intraocular Pressure Increased	P030016	NA	1	Event Description: THE REPORTER INDICATED THAT THE SURGEON IMPLANTED A 13.2MM VTICM5_13.2; -8.50/+2.0/86 (SPHERE/CYLINDER/AXIS) IMPLANTABLE COLLAMER LENS INTO THE PATIENT'S LEFT EYE (OS) ON (B)(6)2021. THE PATIENT EXPERIENCED ELEVATED INTRAOCULAR PRESSURE WITHOUT PUPIL BLOCK AND ANGLE CLOSURE. ON (B)(6) 2022 THE LENS WAS EXPLANTED. THIS RESOLVED THE PROBLEM. Manufacturer Narrative: MEDICAL DEVICE…	Lens Extraction	Resolved
https://www.accessdata.fda.gov/scripts/cdrh/cfdocs/cfMAUDE/Detail.CFM?MDRFOI__ID=16000620&pc=QCB	2023826-2022-04625	2022-08-31 04:00:00	Injury	STAAR SURGICAL COMPANY	2022-12-16 05:00:00	QCB	IMPLANTABLE COLLAMER LENS (ICL)	Off-Label Use; Adverse Event Without Identified Device or Use Problem	Intraocular Pressure Increased	P030016	NA	1	Event Description: THE REPORTER INDICATED THAT THE SURGEON IMPLANTED A 13.2MM VTICM5_13.2; -8.50/+2.0/93 (SPHERE/CYLINDER/AXIS) IMPLANTABLE COLLAMER LENS INTO THE PATIENT'S RIGHT EYE (OD) ON (B)(6) 2021. THE PATIENT EXPERIENCED ELEVATED INTRAOCULAR PRESSURE WITHOUT PUPIL BLOCK AND ANGLE CLOSURE. ON (B)(6) 2022 THE LENS WAS EXPLANTED. THIS RESOLVED THE PROBLEM. Manufacturer Narrative: (B)(4).	Lens Extraction	Resolved
https://www.accessdata.fda.gov/scripts/cdrh/cfdocs/cfMAUDE/Detail.CFM?MDRFOI__ID=16269394&pc=QCB	2023826-2023-00310	2022-10-02 04:00:00	Injury	STAAR SURGICAL COMPANY	2023-01-30 05:00:00	QCB	IMPLANTABLE COLLAMER LENS (ICL)	Adverse Event Without Identified Device or Use Problem	Intraocular Pressure Increased	P030016	NA	1	Event Description: THE REPORTER INDICATED THAT A 13.2MM VTICMO13.2 IMPLANTABLE COLLAMER LENS OF -14.0/2.5/088 (SPHERE/CYLINDER/AXIS) WAS IMPLANTED IN THE PATIENT'S RIGHT EYE (OD) ON (B)(6) 2022. IN A SUBSEQUENT SURGERY LATER THAT DAY, THE LENS WAS EXPLANTED DUE TO ELEVATED IOP. REPORTEDLY, "REMOVE AND NO LONGER IMPLANT." THE PROBLEM WAS RESOLVED. CAUSE OF THE EVENT IS UNKNOWN. Manufacturer Narrat…	Lens Extraction	Resolved
https://www.accessdata.fda.gov/scripts/cdrh/cfdocs/cfMAUDE/Detail.CFM?MDRFOI__ID=16269398&pc=QCB	2023826-2023-00311	2022-10-02 04:00:00	Injury	STAAR SURGICAL COMPANY	2023-01-30 05:00:00	QCB	IMPLANTABLE COLLAMER LENS (ICL)	Adverse Event Without Identified Device or Use Problem	Intraocular Pressure Increased	P030016	NA	1	Event Description: THE REPORTER INDICATED THAT A 13.2MM VTICMO13.2 IMPLANTABLE COLLAMER LENS OF -14.0/2.5/088 (SPHERE/CYLINDER/AXIS) WAS IMPLANTED IN THE PATIENT'S LEFT EYE (OS) ON (B)(6) 2022. IN A SUBSEQUENT SURGERY LATER THAT DAY, THE LENS WAS EXPLANTED DUE TO ELEVATED IOP WITHOUT PUPIL BLOCK AND ANGLE CLOSURE. REPORTEDLY, "REMOVE AND NO LONGER IMPLANT." THE PROBLEM WAS RESOLVED. CAUSE OF THE …	Lens Extraction	Resolved
https://www.accessdata.fda.gov/scripts/cdrh/cfdocs/cfMAUDE/Detail.CFM?MDRFOI__ID=16275247&pc=QCB	2023826-2023-00258	NA	Injury	STAAR SURGICAL COMPANY	2023-01-31 05:00:00	QCB	IMPLANTABLE COLLAMER LENS (ICL)	Off-Label Use; Inadequacy of Device Shape and/or Size	Intraocular Pressure Increased	P030016	NA	1	Event Description: THE REPORTER INDICATED THE SURGEON IMPLANTED A 13.2MM VTICM5_13.2 IMPLANTABLE COLLAMER LENS, -14.00/+2.0/093 (SPHERE/CYLINDER/AXIS), INTO THE PATIENTS LEFT EYE (OS) ON (B)(6) 2022. THE LENS WAS REMOVED ON (B)(6) 2023 DUE TO EXCESSIVE VAULTING AND ELEVATED INTRAOCULAR PRESSURE (IOP). THE LENS WAS REPLACED WITH A SHORTER LENS AND THE PROBLEM WAS RESOLVED. CAUSE OF THE EVENT WAS U…	Lens Exchange	Resolved
https://www.accessdata.fda.gov/scripts/cdrh/cfdocs/cfMAUDE/Detail.CFM?MDRFOI__ID=16275257&pc=QCB	2023826-2023-00257	NA	Injury	STAAR SURGICAL COMPANY	2023-01-31 05:00:00	QCB	IMPLANTABLE COLLAMER LENS (ICL)	Off-Label Use; Inadequacy of Device Shape and/or Size	Intraocular Pressure Increased	P030016	NA	1	Event Description: THE REPORTER INDICATED THE SURGEON IMPLANTED A 13.2MM VTICMO13.2 IMPLANTABLE COLLAMER LENS, -15.50/+2.0/085 (SPHERE/CYLINDER/AXIS), INTO THE PATIENTS RIGHT EYE (OD) ON (B)(6) 2022. THE LENS WAS REMOVED ON (B)(6) 2023 DUE TO EXCESSIVE VAULTING AND ELEVATED INTRAOCULAR PRESSURE (IOP). THE LENS WAS REPLACED WITH A SHORTER LENS AND THE PROBLEM WAS RESOLVED. CAUSE OF THE EVENT WAS U…	Lens Exchange	Resolved
https://www.accessdata.fda.gov/scripts/cdrh/cfdocs/cfMAUDE/Detail.CFM?MDRFOI__ID=16500236&pc=QCB	2023826-2023-00819	2022-11-21 05:00:00	Injury	STAAR SURGICAL COMPANY	2023-03-07 05:00:00	QCB	IMPLANTABLE COLLAMER LENS (ICL)	Inadequacy of Device Shape and/or Size	Intraocular Pressure Increased	P030016	NA	1	Event Description: THE REPORTER INDICATED THAT THE SURGEON IMPLANTED A 13.2MM VTICMO13.2 IMPLANTABLE COLLAMER LENS OF DIOPTER -18.0/+2.0/093 INTO THE PATIENT'S RIGHT EYE (OD) ON (B)(6) 2022. THE LENS WAS EXCHANGED ON (B)(6) 2023 FOR A SHORTER LENGTH LENS DUE TO EXCESSIVE VAULT AND ELEVATED IOP. THIS RESOLVED THE PROBLEM. CAUSE OF EVENT REPORTED AS UNKNOWN. Manufacturer Narrative: CLAIM# (B)(4).	Lens Exchange	Resolved
https://www.accessdata.fda.gov/scripts/cdrh/cfdocs/cfMAUDE/Detail.CFM?MDRFOI__ID=16500270&pc=QCB	2023826-2023-00818	2022-11-17 05:00:00	Injury	STAAR SURGICAL COMPANY	2023-03-07 05:00:00	QCB	IMPLANTABLE COLLAMER LENS (ICL)	Off-Label Use; Inadequacy of Device Shape and/or Size	Intraocular Pressure Increased	P030016	NA	1	Event Description: THE REPORTER INDICATED THAT THE SURGEON IMPLANTED A 12.6MM VTICM5_12.6 IMPLANTABLE COLLAMER LENS OF DIOPTER -7.00/+0.5/100 INTO THE PATIENT'S LEFT EYE (OS) ON (B)(6) 2022. THE LENS WAS EXCHANGED ON (B)(6) 2023 FOR A SHORTER LENGTH LENS DUE TO EXCESSIVE VAULT AND ELEVATED IOP. THIS RESOLVED THE PROBLEM. CAUSE OF EVENT REPORTED AS UNKNOWN. Manufacturer Narrative: DEVICE CODE 1494…	Lens Exchange	Resolved
https://www.accessdata.fda.gov/scripts/cdrh/cfdocs/cfMAUDE/Detail.CFM?MDRFOI__ID=16500271&pc=QCB	2023826-2023-00817	2022-11-17 05:00:00	Injury	STAAR SURGICAL COMPANY	2023-03-07 05:00:00	QCB	IMPLANTABLE COLLAMER LENS (ICL)	Off-Label Use; Inadequacy of Device Shape and/or Size	Intraocular Pressure Increased	P030016	NA	1	Event Description: THE REPORTER INDICATED THAT THE SURGEON IMPLANTED A 12.6MM VTICM5_12.6 IMPLANTABLE COLLAMER LENS OF DIOPTER -6.00/+0.5/045 INTO THE PATIENT'S RIGHT EYE (OD) ON (B)(6) 2022. THE LENS WAS EXCHANGED ON (B)(6) 2023 FOR A SHORTER LENGTH LENS DUE TO EXCESSIVE VAULT AND ELEVATED IOP. THIS RESOLVED THE PROBLEM. CAUSE OF EVENT REPORTED AS UNKNOWN. Manufacturer Narrative: DEVICE CODE 149…	Lens Exchange	Resolved
https://www.accessdata.fda.gov/scripts/cdrh/cfdocs/cfMAUDE/Detail.CFM?MDRFOI__ID=16500966&pc=QCB	2023826-2023-00820	2022-11-21 05:00:00	Injury	STAAR SURGICAL COMPANY	2023-03-08 05:00:00	QCB	IMPLANTABLE COLLAMER LENS (ICL)	Inadequacy of Device Shape and/or Size	Intraocular Pressure Increased	P030016	NA	1	Event Description: THE REPORTER INDICATED THAT THE SURGEON IMPLANTED A 13.2MM VTICMO13.2 IMPLANTABLE COLLAMER LENS OF DIOPTER -18.0/+2.0/094 INTO THE PATIENT'S LEFT EYE (OS) ON (B)(6) 2022. THE LENS WAS EXCHANGED ON (B)(6) 2023 FOR A SHORTER LENGTH LENS DUE TO EXCESSIVE VAULT AND ELEVATED IOP. THIS RESOLVED THE PROBLEM. CAUSE OF EVENT REPORTED AS UNKNOWN. Manufacturer Narrative: CLAIM# (B)(4).	Lens Exchange	Resolved
https://www.accessdata.fda.gov/scripts/cdrh/cfdocs/cfMAUDE/Detail.CFM?MDRFOI__ID=16587673&pc=QCB	2023826-2023-00952	2022-10-25 04:00:00	Injury	STAAR SURGICAL COMPANY	2023-03-21 04:00:00	QCB	IMPLANTABLE COLLAMER LENS (ICL)	Inadequacy of Device Shape and/or Size	Intraocular Pressure Increased	P030016	NA	1	Event Description: THE REPORTER INDICATED THE SURGEON IMPLANTED A 12.6MM VTICMO12.6 IMPLANTABLE COLLAMER LENS, -18.00/+2.0/109 (SPHERE/CYLINDER/AXIS) IN THE PATIENTS LEFT EYE (OS) ON (B)(6) 2022. THE LENS WAS REMOVED ON (B)(6) 2022 DUE TO EXCESSIVE VAULTING AND ELEVATED INTRAOCULAR PRESSURE (IOP). AN ADDITION OF NEW PI WAS PERFORMED BY YAG ON (B)(6) 2022 BUT THE PRESSURE DID NOT GO DOWN. THE PATI…	Lens Extraction + Secondary Operation	Unknown
https://www.accessdata.fda.gov/scripts/cdrh/cfdocs/cfMAUDE/Detail.CFM?MDRFOI__ID=16600700&pc=QCB	2023826-2023-01008	2022-05-28 04:00:00	Injury	STAAR SURGICAL COMPANY	2023-03-23 04:00:00	QCB	IMPLANTABLE COLLAMER LENS (ICL)	Adverse Event Without Identified Device or Use Problem	Intraocular Pressure Increased	P030016	NA	1	Event Description: THE REPORTER INDICATED THAT A 12.6MM VTICM512.6 IMPLANTABLE COLLAMER LENS OF A -13.0/1.5/003 (SPHERE/CYLIDNER/AXIS) WAS IMPLANTED AS A REPLACEMENT INTO THE PATIENT'S LEFT EYE (OS) ON (B)(6) 2023 DUE TO REFRACTIVE SUPRISE. REPORTEDLY, "POSTOPERATIVE DAY 1 IOP AND I/A IS PERFORMED. CURRENTLY, DOCTOR IS TAKING A WAIT-AND-SEE APPROACH." THE CAUSE OF THE EVENT WAS UNKNOWN. THE PROBL…	Lens Retention + Secondary Operation	Resolved
https://www.accessdata.fda.gov/scripts/cdrh/cfdocs/cfMAUDE/Detail.CFM?MDRFOI__ID=16721439&pc=QCB	2023826-2023-01332	2022-12-24 05:00:00	Malfunction	STAAR SURGICAL COMPANY	2023-04-11 04:00:00	QCB	IMPLANTABLE COLLAMER LENS (ICL)	Off-Label Use; Optical Problem	Intraocular Pressure Increased	P030016	NA	1	Event Description: THE REPORTER INDICATED THAT A 12.6MM VTICMO12.6 IMPLANTABLE COLLAMER LENS OF --14.0/1.5/088 (SPHERE/CYLINDER/AXIS) WAS IMPLANTED IN THE PATIENT'S LEFT EYE (OS) ON (B)(6) 2022. THE LENS WAS INTRAOPERATIVELY IMPANTED AND REMOVED DUE TO ELEVATED IOP WITHOUT PUPIL BLOCK AND ANGLE CLOSURE AND SIGNIFICANT REDUCTION OF IRIDO-CORNEAL ANGLES. THE PROBLEM WAS RESOLVED. CAUSE OF THE EVENT…	Lens Extraction	Resolved
https://www.accessdata.fda.gov/scripts/cdrh/cfdocs/cfMAUDE/Detail.CFM?MDRFOI__ID=16792688&pc=QCB	2023826-2023-01434	2023-03-25 04:00:00	Injury	STAAR SURGICAL COMPANY	2023-04-22 04:00:00	QCB	IMPLANTABLE COLLAMER LENS (ICL)	Inadequacy of Device Shape and/or Size; Patient-Device Incompatibility	Intraocular Pressure Increased	P030016	NA	1	Event Description: THE REPORTER INDICATED THAT A 13.2MM VTICMO13.2 IMPLANTABLE COLLAMER LENS OF -11.0/2.5/112 (SPHERE/CYLINDER/AXIS) WAS IMPLANTED INTO THE PATIENT'S LEFT EYE (OS) ON (B)(6) 2023. EXCESSIVE VAULT, ELEVATED IOP WITHOUT PUPIL BLOCK AND ANGLE CLOSURE, AND SIGNIFICANT REDUCTION OF IRIDOCORNEAL ANGLES WERE OBSERVED. THE PROBLEM WAS RESOLVED. CAUSE OF THE EVENT IS REPORTED AS UNKNOWN AN…	Lens Exchange	Not_Resolved
https://www.accessdata.fda.gov/scripts/cdrh/cfdocs/cfMAUDE/Detail.CFM?MDRFOI__ID=16792797&pc=QCB	2023826-2023-01433	2023-03-25 04:00:00	Injury	STAAR SURGICAL COMPANY	2023-04-23 04:00:00	QCB	IMPLANTABLE COLLAMER LENS (ICL)	Inadequacy of Device Shape and/or Size; Patient-Device Incompatibility	Intraocular Pressure Increased	P030016	NA	1	Event Description: THE REPORTER INDICATED THAT A 13.2MM VTICMO13.2 IMPLANTABLE COLLAMER LENS OF -12.0/1.0/147 (SPHERE/CYLINDER/AXIS) WAS IMPLANTED INTO THE PATIENT'S RIGHT EYE (OD) ON (B)(6) 2023. EXCESSIVE VAULT, SIGNIFICANT REDUCTION OF IRIDOCORNEAL ANGLES, AND ANGLE CLOSURE WITH ELEVATED IOP WERE OBSERVED. THE PROBLEM WAS RESOLVED. CAUSE OF THE EVENT IS REPORTED AS UNKNOWN AND PATIENT RELATED …	Lens Exchange	Not_Resolved
https://www.accessdata.fda.gov/scripts/cdrh/cfdocs/cfMAUDE/Detail.CFM?MDRFOI__ID=16917117&pc=QCB	2023826-2023-01760	2021-04-23 04:00:00	Injury	STAAR SURGICAL COMPANY	2023-05-12 04:00:00	QCB	IMPLANTABLE COLLAMER LENS (ICL)	Inadequacy of Device Shape and/or Size	Intraocular Pressure Increased	P030016	NA	1	Event Description: THE REPORTER INDICATED THAT A 12.6MM VTICM5_12.6 IMPLANTABLE COLLAMER LENS -13.00/+1.0/39 (SPHERE/CYLINDER/AXIS) WAS IMPLANTED INTO THE PATIENT'S RIGHT EYE (OD) ON (B)(6) 2021. ON (B)(6) 2021 THE LENS WAS EXCHANGED FOR A SHORTER LENGTH LENS DUE TO EXCESSIVE VAULT AND ELEVATED INTRAOCULAR PRESSURE THE EXCHANGE RESOLVED THE PROBLEM. Manufacturer Narrative: CLAIM# (B)(4).	Lens Extraction	Resolved
https://www.accessdata.fda.gov/scripts/cdrh/cfdocs/cfMAUDE/Detail.CFM?MDRFOI__ID=17216365&pc=QCB	2023826-2023-02549	NA	Injury	STAAR SURGICAL COMPANY	2023-06-28 04:00:00	QCB	IMPLANTABLE COLLAMER LENS (ICL)	Inadequacy of Device Shape and/or Size	Intraocular Pressure Increased	P030016	NA	1	Event Description: THE REPORTER INDICATED THAT THE SURGEON IMPLANTED A 12.6MM VTICM5_12.6, -14.0/1.0/092 (SPHERE/CYLINDER/AXIS), IMPLANTABLE COLLAMER LENS INTO THE PATIENT'S RIGHT EYE (OD). ELEVATED IOP AND EXCESSIVE VAULT WERE OBSERVED. LENS REMAINS IMPLANTED. REPORTEDLY, PATIENT TO BE OBSERVED. ADDITIONAL INFORMATION HAS BEEN REQUESTED BUT NONE HAS BEEN FORTHCOMING. Manufacturer Narrative: CLAI…	Lens Retention	Unknown
https://www.accessdata.fda.gov/scripts/cdrh/cfdocs/cfMAUDE/Detail.CFM?MDRFOI__ID=17216368&pc=QCB	2023826-2023-02550	NA	Injury	STAAR SURGICAL COMPANY	2023-06-28 04:00:00	QCB	IMPLANTABLE COLLAMER LENS (ICL)	Inadequacy of Device Shape and/or Size	Intraocular Pressure Increased	P030016	NA	1	Event Description: THE REPORTER INDICATED THAT THE SURGEON IMPLANTED A 12.6MM VTICM5_12.6, -14.0/1.5/101 (SPHERE/CYLINDER/AXIS), IMPLANTABLE COLLAMER LENS INTO THE PATIENT'S LEFT EYE (OS). ELEVATED IOP AND EXCESSIVE VAULT WERE OBSERVED. LENS REMAINS IMPLANTED. REPORTEDLY, PATIENT TO BE OBSERVED. ADDITIONAL INFORMATION HAS BEEN REQUESTED BUT NONE HAS BEEN FORTHCOMING. Manufacturer Narrative: CLAIM…	Lens Retention	Unknown
https://www.accessdata.fda.gov/scripts/cdrh/cfdocs/cfMAUDE/Detail.CFM?MDRFOI__ID=17253137&pc=QCB	2023826-2023-02657	2023-04-11 04:00:00	Injury	STAAR SURGICAL COMPANY	2023-07-03 04:00:00	QCB	IMPLANTABLE COLLAMER LENS (ICL)	Misfocusing	Intraocular Pressure Increased	P030016	NA	1	Event Description: THE REPORTER INDICATED THAT A 12.6MM VTICM512.6 IMPLANTABLE COLLAMER LENS OF -13.00/1.5/103 (SPHERE/CYLINDER/AXIS) WAS IMPLANTED INTO THE PATIENT'S LEFT EYE (OS). THE LENS WAS REMOVED DUE TO ELEVATED IOP WITHOUT PUPIL BLOCK AND ANGLE CLOSURE. THE PROBLEM WAS RESOLVED. DEVICE WAS MENTIONED AS THE CAUSE OF THE EVENT. REPORTEDLY, "ANTERIOR CATARACT. FIXED BLOWN PUPIL WITH SYNECHAI…	Lens Extraction	Resolved
https://www.accessdata.fda.gov/scripts/cdrh/cfdocs/cfMAUDE/Detail.CFM?MDRFOI__ID=17322467&pc=QCB	2023826-2023-02901	2023-03-14 04:00:00	Injury	STAAR SURGICAL COMPANY	2023-07-13 04:00:00	QCB	IMPLANTABLE COLLAMER LENS (ICL)	Off-Label Use; Inadequacy of Device Shape and/or Size	Intraocular Pressure Increased	P030016	NA	1	Event Description: THE REPORTER INDICATED THAT A 12.6MM VTICMO12.6 IMPLANTABLE COLLAMER LENS OF -11.0/1.5/129 (SPHERE/CYLINDER/AXIS) WAS IMPLANTED INTO THE PATIENT'S RIGHT EYE (OD) ON (B)(6)2023. ON (B)(6)2023 THE LENS WAS EXPLANTED DUE TO EXCESSIVE VAULT AND INTRAOCULAR PRESSURE. THE EXPLANT RESOLVED THE PROBLEM. THE REPORTER STATES THE CAUSE OF THIS EVENT IS UNKNOWN. IT WAS REPORTED THAT THE PA…	Lens Extraction	Resolved
https://www.accessdata.fda.gov/scripts/cdrh/cfdocs/cfMAUDE/Detail.CFM?MDRFOI__ID=17322480&pc=QCB	2023826-2023-02848	2023-03-14 04:00:00	Injury	STAAR SURGICAL COMPANY	2023-07-13 04:00:00	QCB	IMPLANTABLE COLLAMER LENS (ICL)	Off-Label Use; Inadequacy of Device Shape and/or Size	Intraocular Pressure Increased	P030016	NA	1	Event Description: THE REPORTER INDICATED THAT A 12.6MM VTICMO12.6 IMPLANTABLE COLLAMER LENS OF -11.5/1.5/126 (SPHERE/CYLINDER/AXIS) WAS IMPLANTED INTO THE PATIENT'S LEFT EYE (OS) ON (B)(6)2023. ON (B)(6)2023 THE LENS WAS EXPLANTED DUE TO EXCESSIVE VAULT AND INTRAOCULAR PRESSURE. THE EXPLANT RESOLVED THE PROBLEM. THE REPORTER STATES THE CAUSE OF THIS EVENT IS UNKNOWN. IT WAS REPORTED THAT THE PAT…	Lens Extraction	Resolved
https://www.accessdata.fda.gov/scripts/cdrh/cfdocs/cfMAUDE/Detail.CFM?MDRFOI__ID=17465253&pc=QCB	2023826-2023-03310	NA	Injury	STAAR SURGICAL COMPANY	2023-08-04 04:00:00	QCB	IMPLANTABLE COLLAMER LENS (ICL)	Device Dislodged or Dislocated	Intraocular Pressure Increased	P030016	NA	1	Event Description: THE REPORTER INDICATED THAT THE SURGEON IMPLANTED A 12.6MM VTICMO12.6; -16.5/1.5/004 (SPHERE/CYLINDER/AXIS) IMPLANTABLE COLLAMER LENS INTO THE PATIENT'S RIGHT EYE (OD) AS A REPLACEMENT LENS ON (B)(6) 2022. ON (B)(6) 2023 THE LENS WAS EXPLANTED DUE TO LENS ROTATION AND IOP SPIKES. IT WAS INDICATED THERE WILL BE NOT REPLACEMENT LENS. THE PROBLEM IS NOT RESOLVED. Manufacturer Narr…	Lens Extraction	Not_Resolved
https://www.accessdata.fda.gov/scripts/cdrh/cfdocs/cfMAUDE/Detail.CFM?MDRFOI__ID=17465254&pc=QCB	2023826-2023-03311	NA	Injury	STAAR SURGICAL COMPANY	2023-08-04 04:00:00	QCB	IMPLANTABLE COLLAMER LENS (ICL)	Device Dislodged or Dislocated	Intraocular Pressure Increased	P030016	NA	1	Event Description: THE REPORTER INDICATED IMPLANTED A 12.6MM VTICMO12.6; -16.5/1.0/002 (SPHERE / CYLINDER / AXIS) IMPLANTABLE COLLAMER LENS INTO THE PATIENT'S LEFT EYE (OS) ON (B)(6) 2022 AS A REPLACEMENT LENS. THE LENS WAS EXPLANTED ON (B)(6) 2023 DUE TO LENS ROTATION AND IOP SPIKES. IT WAS INDICATED THERE WILL BE NOT REPLACEMENT LENS. THE PROBLEM IS NOT RESOLVED. Manufacturer Narrative: H6 - TY…	Lens Extraction	Not_Resolved
https://www.accessdata.fda.gov/scripts/cdrh/cfdocs/cfMAUDE/Detail.CFM?MDRFOI__ID=17914527&pc=QCB	2023826-2023-04273	2023-05-25 04:00:00	Injury	STAAR SURGICAL COMPANY	2023-10-11 04:00:00	QCB	IMPLANTABLE COLLAMER LENS (ICL)	Adverse Event Without Identified Device or Use Problem	Intraocular Pressure Increased	P030016	NA	1	Event Description: THE REPORTER INDICATED THAT A 13.2MM VTICMO 13.2 IMPLANTABLE COLLAMER LENS OF -8.00/1.0/091 (SPHERE/CYLINDER/AXIS) WAS IMPLANTED INTO THE PATIENTS LEFT EYE (OS) ON (B)(6) 2019. ON (B)(6) 2023 THE LENS WAS EXCHANGED FOR A SHORTER LENGTH LENS DUE TO ELEVATED IOP AND THE PROBLEM WAS RESOLVED. Manufacturer Narrative: INVESTIGATION TYPE 4110: LENS WORK ORDER SEARCH- NO SIMILAR COMPL…	Lens Exchange	Resolved
https://www.accessdata.fda.gov/scripts/cdrh/cfdocs/cfMAUDE/Detail.CFM?MDRFOI__ID=18136876&pc=QCB	2023826-2023-05060	2023-07-08 04:00:00	Injury	STAAR SURGICAL COMPANY	2023-11-14 05:00:00	QCB	IMPLANTABLE COLLAMER LENS (ICL)	Off-Label Use; Adverse Event Without Identified Device or Use Problem	Intraocular Pressure Increased	P030016	NA	1	Event Description: THE REPORTER INDICATED THAT A 12.6MM VTICMO12.6 IMPLANTABLE COLLAMER LENS OF -11.5/0.5/015 (SPHERE/CYLINDER/AXIS) WAS IMPLANTED INTO THE PATIENTS RIGHT EYE (OD) ON (B)(6) 2023. ON (B)(6) 2023 THE LENS WAS EXPLANTED DUE TO ELEVATED INTRAOCULAR PRESSURE. THE EXPLANT RESOLVED THE PROBLEM. IN THE REPORTERS OPINION THE CAUSE OF THE EVENT WAS UNKNOWN. Manufacturer Narrative: H6 - TYP…	Lens Extraction	Resolved
https://www.accessdata.fda.gov/scripts/cdrh/cfdocs/cfMAUDE/Detail.CFM?MDRFOI__ID=18136885&pc=QCB	2023826-2023-05061	2023-07-08 04:00:00	Injury	STAAR SURGICAL COMPANY	2023-11-14 05:00:00	QCB	IMPLANTABLE COLLAMER LENS (ICL)	Off-Label Use; Adverse Event Without Identified Device or Use Problem	Intraocular Pressure Increased	P030016	NA	1	Event Description: THE REPORTER INDICATED THAT A 12.6MM VTICMO12.6 IMPLANTABLE COLLAMER LENS OF -12.5/1.0/170 (SPHERE/CYLINDER/AXIS) WAS IMPLANTED INTO THE PATIENTS LEFT EYE (OS) ON (B)(6) 2023. ON (B)(6) 2023 THE LENS WAS EXPLANTED DUE TO ELEVATED INTRAOCULAR PRESSURE. THE EXPLANT RESOLVED THE PROBLEM. IN THE REPORTERS OPINION THE CAUSE OF THE EVENT WAS UNKNOWN. Manufacturer Narrative: H6 - TYPE…	Lens Extraction	Resolved
https://www.accessdata.fda.gov/scripts/cdrh/cfdocs/cfMAUDE/Detail.CFM?MDRFOI__ID=18223147&pc=QCB	2023826-2023-05376	2023-11-07 05:00:00	Injury	STAAR SURGICAL COMPANY	2023-11-28 05:00:00	QCB	IMPLANTABLE COLLAMER LENS (ICL)	Inadequacy of Device Shape and/or Size	Intraocular Pressure Increased	P030016	NA	1	Event Description: THE REPORTER INDICATED THAT THE SURGEON IMPLANTED A 12.6MM VTICM5_12.6; -5.00/3.5/104 (SPHERE/CYLINDER/AXIS) IMPLANTABLE COLLAMER LENS INTO THE PATIENT'S LEFT EYE (OS) ON (B)(6) 2023. THE PATIENT EXPERIENCED EXCESSIVE VAULTING AND ELEVATED INTRAOCULAR PRESSURE WITHOUT PUPIL BLOCK. ON (B)(6) 2023 THE LENS WAS EXCHANGED WITH A SHORTER LENGTH LENS AND THIS RESOLVED THE PROBLEM. TH…	Lens Exchange	Resolved
https://www.accessdata.fda.gov/scripts/cdrh/cfdocs/cfMAUDE/Detail.CFM?MDRFOI__ID=18258193&pc=QCB	2023826-2023-05318	2023-10-13 04:00:00	Injury	STAAR SURGICAL COMPANY	2023-12-04 05:00:00	QCB	IMPLANTABLE COLLAMER LENS (ICL)	No Apparent Adverse Event	Intraocular Pressure Increased	P030016	NA	1	Event Description: THE REPORTER INDICATED THAT THE SURGEON IMPLANTED A 13.2MM VTICMO 13.2, -7.5/1.0/114 (SPHERE/CYLINDER/AXIS), IMPLANTABLE COLLAMER LENS INTO THE PATIENT'S RIGHT EYE (OD) ON (B)(6)2023. ELEVATED IOP 34MMHG WITHOUT PUPIL BLOCK AND ANGLE CLOSURE WAS OBSERVED. OPHTHALMIC DROPS PRESCRIBED(BROMFENAC SODIUM HYDRATE AND LATANOPROST). NO OTHER SYSTEMS WERE OBSERVED. PROBLEM RESOLVED. Man…	Lens Retention	Resolved
https://www.accessdata.fda.gov/scripts/cdrh/cfdocs/cfMAUDE/Detail.CFM?MDRFOI__ID=18287965&pc=QCB	2023826-2023-05442	NA	Injury	STAAR SURGICAL COMPANY	2023-12-07 05:00:00	QCB	IMPLANTABLE COLLAMER LENS (ICL)	Adverse Event Without Identified Device or Use Problem	Intraocular Pressure Increased	P030016	NA	1	Event Description: THE REPORTER INDICATED THE SURGEON IMPLANTED A TORIC EVO ICL IMPLANTABLE COLLAMER LENS, INTO THE PATIENTS EYE. AT ONE MONTH POST-OP, THE PATIENT HAD PERSISTENT ELEVATED INTRAOCULAR PRESSURE (IOP), WHICH WAS BEING TREATED WITH IOP LOWERING MEDICATIONS. THE PATIENT HAD NO SYMPTOMS OF ANGLE CLOSURE AND NO SIGNS OF INFLAMMATION. THE LENS REMAINED IMPLANTED. ADDITIONAL INFORMATION H…	Lens Retention	Resolved
https://www.accessdata.fda.gov/scripts/cdrh/cfdocs/cfMAUDE/Detail.CFM?MDRFOI__ID=18298068&pc=QCB	2023826-2023-05435	2023-10-05 04:00:00	Injury	STAAR SURGICAL COMPANY	2023-12-09 05:00:00	QCB	IMPLANTABLE COLLAMER LENS (ICL)	Inadequacy of Device Shape and/or Size	Intraocular Pressure Increased	P030016	NA	1	Event Description: THE REPORTER INDICATED THAT A 13.2MM VTICM5 13.2 IMPLANTABLE COLLAMER LENS OF -10.50/2.5/086 (SPHERE/CYLINDER/AXIS) WAS IMPLANTED INTO THE PATIENTS RIGHT EYE (OD) ON (B)(6) 2023. ON (B)(6) 2023 THE LENS WAS EXCHANGED FOR A SHORTER LENGTH LENS DUE TO EXCESSIVE VAULT AND ELEVATED IOP. THE EXCHANGE RESOLVED THE PROBLEM. CAUSE REPORTED AS UNKNOWN. Manufacturer Narrative: CLAIM # (B…	Lens Exchange	Resolved
https://www.accessdata.fda.gov/scripts/cdrh/cfdocs/cfMAUDE/Detail.CFM?MDRFOI__ID=18346344&pc=QCB	2023826-2023-05691	2023-10-11 04:00:00	Injury	STAAR SURGICAL COMPANY	2023-12-18 05:00:00	QCB	IMPLANTABLE COLLAMER LENS (ICL)	Inadequacy of Device Shape and/or Size	Intraocular Pressure Increased	P030016	NA	1	Event Description: THE REPORTER INDICATED THAT THE SURGEON IMPLANTED A 13.2MM VTICMO13.2; -18.00/2.5/105 (SPHERE/CYLINDER/AXIS) IMPLANTABLE COLLAMER LENS INTO THE PATIENT'S RIGHT EYE (OD) ON (B)(6) 2023. THE PATIENT EXPERIENCED EXCESSIVE VAULTING AND ELEVATED INTRAOCULAR PRESSURE. ON (B)(6) 2023 THE LENS WAS EXCHANGED WITH A SHORTER LENGTH LENS AND THE PROBLEM WAS RESOLVED. THE CAUSE OF THE EVENT…	Lens Exchange	Resolved
https://www.accessdata.fda.gov/scripts/cdrh/cfdocs/cfMAUDE/Detail.CFM?MDRFOI__ID=11238020&pc=QCB	2023826-2021-00168	2020-12-18	Malfunction	STAAR SURGICAL COMPANY AG	2021-01-27	QCB	IMPLANTABLE COLLAMER LENS (ICL)	Inadequacy of Device Shape and/or Size	Intraocular Pressure Increased	N/A	NA	1	Event Description: THE REPORTER INDICATED THAT THE SURGEON IMPLANTED A 13.2MM VTICMO13.2, -8.50/0.5/064 (SPHERE/CYLINDER/AXIS), IMPLANTABLE COLLAMER LENS INTO THE PATIENT'S LEFT EYE (OS) IN (B)(6) 2013. REFRACTIVE CHANGE OVERTIME AND LOW VAULT WERE OBSERVED. LENS REMAINS IMPLANTED. CAUSE OF THE EVENT IS REPORTED AS UNKNOWN. ADDITIONAL INFORMATION HAS BEEN REQUESTED BUT NONE HAS BEEN FORTHCOMING. …	Lens Retention	Unknown
https://www.accessdata.fda.gov/scripts/cdrh/cfdocs/cfMAUDE/Detail.CFM?MDRFOI__ID=10537728&pc=QCB	2023826-2020-02067	2020-08-20	Injury	STAAR SURGICAL COMPANY	2020-09-15	QCB	IMPLANTABLE COLLAMER LENS (ICL)	Inadequacy of Device Shape and/or Size	Intraocular Pressure Increased; Appropriate Clinical Signs, Symptoms, Conditions Term / Code Not Available	P030016	NA	1	Event Description: THE REPORTER INDICATED THE SURGEON IMPLANTED A 13.2MM TMICL13.2 IMPLANTABLE COLLAMER LENS, -10.00/+1.5/109 (SPHERE/CYLINDER/AXIS), IN THE PATIENTS RIGHT EYE (OD) ON (B)(6) 2020. THE LENS WAS EXPLANTED ON (B)(6) 2020 DUE TO EXCESSIVE VAULTING, ANGLE CLOSURE, WITH ELEVATED INTRAOCULAR PRESSURE. THE SURGEON ENLARGED/ADDITION OF PERIPHERAL IRIDOTOMY, BY YAG. A SUTURE WAS REQUIRED. …	Lens Exchange + Secondary Operation	Resolved
https://www.accessdata.fda.gov/scripts/cdrh/cfdocs/cfMAUDE/Detail.CFM?MDRFOI__ID=10566551&pc=QCB	2023826-2020-02177	2020-07-18	Injury	STAAR SURGICAL COMPANY	2020-09-22	QCB	IMPLANTABLE COLLAMER LENS (ICL)	Inadequacy of Device Shape and/or Size	Intraocular Pressure Increased; Appropriate Clinical Signs, Symptoms, Conditions Term / Code Not Available	NA#S-P#NA	NA	1	Event Description: THE REPORTER INDICATED THE SURGEON IMPLANTED A 13.7MM VTICMO13.7 IMPLANTABLE COLLAMER LENS, -14.50/+1.0/097 (SPHERE/CYLINDER/AXIS), IN THE PATIENTS LEFT EYE (OS) ON (B)(6) 2020. THE LENS WAS REPORTED AS HAVING A HUGE VAULT AND ANGLE CLOSURE, WITH ELEVATED INTRAOCULAR PRESSURE. THE SURGEON PERFORMED A COLOBOMA ON (B)(6) 2020, WHICH CORRECTED THE SITUATION A LITTLE BIT, BUT ANGLE…	Lens Retention + Secondary Operation	Resolved
https://www.accessdata.fda.gov/scripts/cdrh/cfdocs/cfMAUDE/Detail.CFM?MDRFOI__ID=10566577&pc=QCB	2023826-2020-02176	2020-07-18 04:00:00	Injury	STAAR SURGICAL COMPANY	2020-09-22 04:00:00	QCB	IMPLANTABLE COLLAMER LENS (ICL)	Inadequacy of Device Shape and/or Size	Intraocular Pressure Increased; Appropriate Clinical Signs, Symptoms, Conditions Term / Code Not Available	NA#S-P#NA	NA	1	Event Description: THE REPORTER INDICATED THE SURGEON IMPLANTED A 13.7MM VTICMO13.7 IMPLANTABLE COLLAMER LENS, -14.00/+1.0/091 (SPHERE/CYLINDER/AXIS), IN THE PATIENTS RIGHT EYE (OD) ON (B)(6) 2020. THE LENS WAS REPORTED AS HAVING A HUGE VAULT AND ANGLE CLOSURE, WITH ELEVATED INTRAOCULAR PRESSURE. THE SURGEON PERFORMED A COLOBOMA ON (B)(6) 2020, WHICH CORRECTED THE SITUATION A LITTLE BIT, BUT ANGL…	Lens Exchange + Secondary Operation	Resolved
https://www.accessdata.fda.gov/scripts/cdrh/cfdocs/cfMAUDE/Detail.CFM?MDRFOI__ID=10634500&pc=QCB	2023826-2020-02281	2020-09-10 04:00:00	Injury	STAAR SURGICAL COMPANY	2020-10-06 04:00:00	QCB	IMPLANTABLE COLLAMER LENS (ICL)	Inadequacy of Device Shape and/or Size	Intraocular Pressure Increased; Appropriate Clinical Signs, Symptoms, Conditions Term / Code Not Available	P030016	NA	1	Event Description: THE REPORTER INDICATED THE SURGEON IMPLANTED A 13.2MM TMICL13.2 IMPLANTABLE COLLAMER LENS, -13.00/+2.5/093 (SPHERE/CYLINDER/AXIS), IN THE PATIENTS LEFT EYE (OS). THE LENS WAS EXPLANTED DUE TO EXCESSIVE VAULTING AND INTERMITTENT ANGLE CLOSURE. ADDITIONAL INFORMATION HAS BEEN REQUESTED BUT NONE HAS BEEN FORTHCOMING. IF ADDITIONAL INFORMATION IS RECEIVED, A SUPPLEMENTAL MEDWATCH W…	Lens Exchange + Secondary Operation	Resolved
https://www.accessdata.fda.gov/scripts/cdrh/cfdocs/cfMAUDE/Detail.CFM?MDRFOI__ID=10634519&pc=QCB	2023826-2020-02294	2020-09-12 04:00:00	Injury	STAAR SURGICAL COMPANY	2020-10-06 04:00:00	QCB	IMPLANTABLE COLLAMER LENS (ICL)	Inadequacy of Device Shape and/or Size	Intraocular Pressure Increased; Appropriate Clinical Signs, Symptoms, Conditions Term / Code Not Available	NA#S-P#NA	NA	1	Event Description: THE REPORTER INDICATED THE SURGEON IMPLANTED A 13.2MM VTICMO13.2 IMPLANTABLE COLLAMER LENS, -12.50/+5.0/097 (SPHERE/CYLINDER/AXIS), IN THE PATIENTS RIGHT EYE (OD), ON (B)(6) 2020. THE LENS WAS REPORTED AS HAVING EXCESSIVE VAULTING, ELEVATED INTRAOCULAR PRESSURE (IOP), SIGNIFICANT REDUCTION OF IRIDO-CORNEAL ANGLES AND UNREACTIVE (FIXED) PUPIL. THE IOP WAS CONTROLLED WITH AGGRESS…	Lens Exchange	Resolved
https://www.accessdata.fda.gov/scripts/cdrh/cfdocs/cfMAUDE/Detail.CFM?MDRFOI__ID=10635452&pc=QCB	2023826-2020-02242	2020-08-12 04:00:00	Injury	STAAR SURGICAL COMPANY	2020-10-06 04:00:00	QCB	IMPLANTABLE COLLAMER LENS (ICL)	Inadequacy of Device Shape and/or Size	Intraocular Pressure Increased; Appropriate Clinical Signs, Symptoms, Conditions Term / Code Not Available	N/A	NA	1	Event Description: THE REPORTER INDICATED THAT THE SURGEON IMPLANTED A 13.2MM VTICMO13.2, -17.00/2.0/127 (SPHERE/CYLINDER/AXIS), IMPLANTABLE COLLAMER LENS INTO THE PATIENT'S RIGHT EYE (OD) ON (B)(6) 2020. THE LENS WAS REMOVED AND REPLACED FOR A SHORTER LENGTH LENS ON (B)(6) 2020 DUE TO EXCESSIVE VAULT AND ELEVATED IOP (22MMHG) WITHOUT PUPIL BLOCK AND ANGLE CLOSURE THAT WAS ASSESSED ON (B)(6) 2020…	Lens Exchange	Resolved
https://www.accessdata.fda.gov/scripts/cdrh/cfdocs/cfMAUDE/Detail.CFM?MDRFOI__ID=11099005&pc=QCB	2023826-2020-03218	2020-11-27 05:00:00	Injury	STAAR SURGICAL COMPANY	2020-12-30 05:00:00	QCB	IMPLANTABLE COLLAMER LENS (ICL)	Inadequacy of Device Shape and/or Size	Intraocular Pressure Increased; Appropriate Clinical Signs, Symptoms, Conditions Term / Code Not Available	NA#S-P#NA	NA	1	Event Description: THE REPORTER INDICATED THE SURGEON IMPLANTED A 13.2MM VTICMO13.2 IMPLANTABLE COLLAMER LENS, -14.00/+2.0/085 (SPHERE/CYLINDER/AXIS), IN THE PATIENTS LEFT EYE (OS), ON (B)(6) 2020. THE LENS WAS EXPLANTED ON (B)(6) 2020 DUE TO EXCESSIVE VAULTING, ELEVATED INTRAOCULAR PRESSURE, AND SHALLOW CHAMBER. THERE WAS AQUEOUS MISDIRECTION, WHICH WAS RELIEVED WITH VITREOUS TAPS. THE LENS WAS …	Lens Exchange	Not_Resolved
https://www.accessdata.fda.gov/scripts/cdrh/cfdocs/cfMAUDE/Detail.CFM?MDRFOI__ID=11091484&pc=QCB	2023826-2020-03221	2020-11-18 05:00:00	Injury	STAAR SURGICAL COMPANY	2020-12-29 05:00:00	QCB	IMPLANTABLE COLLAMER LENS (ICL)	Inadequacy of Device Shape and/or Size	Intraocular Pressure Increased; Appropriate Clinical Signs, Symptoms, Conditions Term / Code Not Available	N/A	NA	1	Event Description: THE REPORTER INDICATED THE SURGEON IMPLANTED A 13.2MM VTICM5_13.2 IMPLANTABLE COLLAMER LENS, -03.00/+3.0/062 (SPHERE/CYLINDER/AXIS), IN THE PATIENTS RIGHT EYE (OD), ON (B)(6) 2020. THE LENS WAS EXPLANTED ON (B)(6) 2020 DUE TO EXCESSIVE VAULTING, ANGLE CLOSURE WITH ELEVATED INTRAOCULAR PRESSURE. THE LENS WAS EXCHANGED FOR A SHORTER LENS AND THE PROBLEM WAS RESOLVED. THE CAUSE OF…	Lens Exchange	Resolved
https://www.accessdata.fda.gov/scripts/cdrh/cfdocs/cfMAUDE/Detail.CFM?MDRFOI__ID=11091943&pc=QCB	2023826-2020-03217	2020-11-27 05:00:00	Injury	STAAR SURGICAL COMPANY	2020-12-29 05:00:00	QCB	IMPLANTABLE COLLAMER LENS (ICL)	Inadequacy of Device Shape and/or Size	Intraocular Pressure Increased; Appropriate Clinical Signs, Symptoms, Conditions Term / Code Not Available	NA#S-P#NA	NA	1	Event Description: THE REPORTER INDICATED THE SURGEON IMPLANTED A 13.2MM VTICMO13.2 IMPLANTABLE COLLAMER LENS, -14.00/+2.0/094 (SPHERE/CYLINDER/AXIS), IN THE PATIENTS RIGHT EYE (OD), ON (B)(6) 2020. THE LENS WAS EXPLANTED ON (B)(6) 2020 DUE TO EXCESSIVE VAULTING, ELEVATED INTRAOCULAR PRESSURE, SIGNIFICANT REDUCTION OF IRIDO-CORNEAL ANGLES AND SHALLOW CHAMBER. THERE WAS AQUEOUS MISDIRECTION, WHICH…	Lens Exchange	Not_Resolved
https://www.accessdata.fda.gov/scripts/cdrh/cfdocs/cfMAUDE/Detail.CFM?MDRFOI__ID=11091947&pc=QCB	2023826-2020-03220	2020-12-16 05:00:00	Injury	STAAR SURGICAL COMPANY	2020-12-29 05:00:00	QCB	IMPLANTABLE COLLAMER LENS (ICL)	Inadequacy of Device Shape and/or Size	Intraocular Pressure Increased; Appropriate Clinical Signs, Symptoms, Conditions Term / Code Not Available	NA#S-P#NA	NA	1	Event Description: THE REPORTER INDICATED THE SURGEON IMPLANTED A 12.6MM VTICMO12.6 IMPLANTABLE COLLAMER LENS, -13.50/+2.0/101 (SPHERE/CYLINDER/AXIS), IN THE PATIENTS LEFT EYE (OS), ON (B)(6) 2020. THE LENS WAS REPORTED AS HAVING HIGH VAULTING. THE LENS REMAINED IMPLANTED. THE CAUSE OF THE EVENT WAS DUE TO THE DEVICE. MEDICATION WAS PRESCRIBED, THE CORNEA WAS CLEAR, ICL WAS CENTERED, WITH IRIS PI…	Lens Exchange	Resolved
https://www.accessdata.fda.gov/scripts/cdrh/cfdocs/cfMAUDE/Detail.CFM?MDRFOI__ID=11092035&pc=QCB	2023826-2020-03219	2020-12-16 05:00:00	Injury	STAAR SURGICAL COMPANY	2020-12-29 05:00:00	QCB	IMPLANTABLE COLLAMER LENS (ICL)	Inadequacy of Device Shape and/or Size	Intraocular Pressure Increased; Appropriate Clinical Signs, Symptoms, Conditions Term / Code Not Available	N/A	NA	1	Event Description: THE REPORTER INDICATED THE SURGEON IMPLANTED A 12.6MM VTICMO12.6 IMPLANTABLE COLLAMER LENS, -14.00/+2.0/078 (SPHERE/CYLINDER/AXIS), IN THE PATIENTS RIGHT EYE (OD), ON (B)(6) 2020. THE LENS WAS REPORTED AS HAVING A HIGH VAULT. THE LENS REMAINED IMPLANTED. THE CAUSE OF THE EVENT WAS DUE TO THE DEVICE. MEDICATION WAS PRESCRIBED, CLEAR CORNEA, CENTERED ICL, WITH IRIS PIGMENTS ON LE…	Lens Exchange	Resolved
https://www.accessdata.fda.gov/scripts/cdrh/cfdocs/cfMAUDE/Detail.CFM?MDRFOI__ID=11135881&pc=QCB	2023826-2021-00039	2020-12-02 05:00:00	Injury	STAAR SURGICAL COMPANY	2021-01-07 05:00:00	QCB	IMPLANTABLE COLLAMER LENS (ICL)	Inadequacy of Device Shape and/or Size	Intraocular Pressure Increased; Appropriate Clinical Signs, Symptoms, Conditions Term / Code Not Available	N/A	NA	1	Event Description: THE REPORTER INDICATED THE SURGEON IMPLANTED 13.2MM TMICL13.2 IMPLANTABLE COLLAMER LENS, -14.0/+4.0/093 (SPHERE/CYLINDER/AXIS), INTO THE PATIENTS RIGHT EYE (OD) ON (B)(6) 2020. THE SURGEON REPORTS EXCESSIVE VAULT AND ELEVATED IOP, WHICH RESPONDED TO ENHANCED PIS. REPORTEDLY, THE LENS REMAINS IMPLANTED. Manufacturer Narrative: B5-UPDATED INFO: UNREACTIVE (FIXED) PUPIL AND ADDITI…	Lens Extraction	Resolved
https://www.accessdata.fda.gov/scripts/cdrh/cfdocs/cfMAUDE/Detail.CFM?MDRFOI__ID=11343216&pc=QCB	2023826-2021-00407	2021-01-15	Injury	STAAR SURGICAL COMPANY	2021-02-18	QCB	IMPLANTABLE COLLAMER LENS (ICL)	Adverse Event Without Identified Device or Use Problem	Intraocular Pressure Increased; Appropriate Clinical Signs, Symptoms, Conditions Term / Code Not Available	N/A	NA	1	Event Description: THE REPORTER INDICATED THAT THE SURGEON IMPLANTED A 13.2MM VTICH13.2, -8.50/1.0/092 (SPHERE/CYLINDER/AXIS), IMPLANTABLE COLLAMER LENS INTO THE PATIENT'S LEFT EYE (OS) ON (B)(6) 2021. THE LENS WAS EXPLANTED DUE TO ELEVATED IOP WITHOUT PUPIL BLOCK AND ANGLE CLOSURE, SIGNIFICANT REDUCTION OF IIDO-CORNEAL ANGLES AND AC SHALLOW IN A SECOND SURGERY ON (B)(6) 2021. THIS RESOLVED THE P…	Lens Extraction	Resolved
https://www.accessdata.fda.gov/scripts/cdrh/cfdocs/cfMAUDE/Detail.CFM?MDRFOI__ID=11343218&pc=QCB	2023826-2021-00406	2021-01-15	Injury	STAAR SURGICAL COMPANY	2021-02-18	QCB	IMPLANTABLE COLLAMER LENS (ICL)	Adverse Event Without Identified Device or Use Problem	Intraocular Pressure Increased; Appropriate Clinical Signs, Symptoms, Conditions Term / Code Not Available	N/A	NA	1	Event Description: THE REPORTER INDICATED THAT THE SURGEON IMPLANTED A 13.2MM VTICH13.2, -7.50/2.0/126 (SPHERE/CYLINDER/AXIS), IMPLANTABLE COLLAMER LENS INTO THE PATIENT'S RIGHT EYE (OD) ON (B)(6) 2021. THE LENS WAS EXPLANTED DUE TO ELEVATED IOP WITHOUT PUPIL BLOCK AND ANGLE CLOSURE, SIGNIFICANT REDUCTION OF IIDO-CORNEAL ANGLES AND AC SHALLOW IN A SECOND SURGERY ON (B)(6) 2021. THIS RESOLVED THE …	Lens Extraction	Resolved
https://www.accessdata.fda.gov/scripts/cdrh/cfdocs/cfMAUDE/Detail.CFM?MDRFOI__ID=11366548&pc=QCB	2023826-2021-00478	2021-01-26 05:00:00	Injury	STAAR SURGICAL COMPANY	2021-02-23 05:00:00	QCB	IMPLANTABLE COLLAMER LENS (ICL)	Inadequacy of Device Shape and/or Size	Intraocular Pressure Increased; Appropriate Clinical Signs, Symptoms, Conditions Term / Code Not Available	N/A	NA	1	Event Description: THE REPORTER INDICATED THAT THE SURGEON IMPLANTED A 13.7MM VTICMO13.7 IMPLANTABLE COLLAMER LENS, -18.0/+1.5/079 (SPHERE/CYLINDER/AXIS), INTO THE PATIENT'S LEFT EYE (OS) ON (B)(6) 2021. ON (B)(6) 2021 THE LENS WAS EXCHANGED WITH A SHORTER LENGTH LENS DUE TO EXCESSIVE VAULT, ELEVATED IOP, AND SIGNIFICANT REDUCTION OF IRIDO-CORNEAL ANGLES (ICA). THE PROBLEM WAS RESOLVED. THE CAUSE…	Lens Exchange	Resolved
https://www.accessdata.fda.gov/scripts/cdrh/cfdocs/cfMAUDE/Detail.CFM?MDRFOI__ID=11389451&pc=QCB	2023826-2021-00545	NA	Injury	STAAR SURGICAL COMPANY	2021-02-26	QCB	IMPLANTABLE COLLAMER LENS (ICL)	Inadequacy of Device Shape and/or Size	Intraocular Pressure Increased; Appropriate Clinical Signs, Symptoms, Conditions Term / Code Not Available	NA	NA	1	Event Description: THE REPORTER INDICATED THAT A 13.2MM, VTICM5_13.2, -12.50/1.0/085 (SPHERE/CYLINDER/AXIS), IMPLANTABLE COLLAMER LENS WAS IMPLANTED INTO THE PATIENTS RIGHT EYE (OD) ON (B)(6) 2020. ON (B)(6) 2021 THE LENS WAS EXCHANGED FOR A SHORTER LENGTH LENS DUE TO EXCESSIVE VAULT, ELEVATED IOP, AND SIGNIFICANT REDUCTION OF ICA. THIS EXCHANGE RESOLVED THE PROBLEM. CAUSE OF THE EVENT WAS REPORT…	Lens Exchange	Resolved
https://www.accessdata.fda.gov/scripts/cdrh/cfdocs/cfMAUDE/Detail.CFM?MDRFOI__ID=11478839&pc=QCB	2023826-2021-00639	2020-09-24 04:00:00	Injury	STAAR SURGICAL COMPANY	2021-03-14 05:00:00	QCB	IMPLANTABLE COLLAMER LENS (ICL)	Off-Label Use; Inadequacy of Device Shape and/or Size	Intraocular Pressure Increased; Appropriate Clinical Signs, Symptoms, Conditions Term / Code Not Available	NA	NA	1	Event Description: THE REPORTER INDICATED THE SURGEON IMPLANTED A 12.6MM VTICMO12.6 IMPLANTABLE COLLAMER LENS, -12.00/+1.5/092 (SPHERE/CYLINDER/AXIS), IN THE PATIENTS LEFT EYE (OS), ON (B)(6) 2020. THE LENS WAS EXPLANTED ON (B)(6) 2020 DUE TO EXCESSIVE VAULTING, ELEVATED INTRAOCULAR PRESSURE AND SIGNIFICANT REDUCTION OF IRIDO-CORNEAL ANGLES. THE LENS WAS EXCHANGED FOR A DIFFERENT MODEL BUT SAME L…	Lens Exchange	Resolved
https://www.accessdata.fda.gov/scripts/cdrh/cfdocs/cfMAUDE/Detail.CFM?MDRFOI__ID=11616998&pc=QCB	2023826-2021-00922	2021-03-12 05:00:00	Injury	STAAR SURGICAL COMPANY	2021-04-05 04:00:00	QCB	IMPLANTABLE COLLAMER LENS (ICL)	Off-Label Use; Inadequacy of Device Shape and/or Size	Intraocular Pressure Increased; Appropriate Clinical Signs, Symptoms, Conditions Term / Code Not Available	NA	NA	1	Event Description: THE REPORTER INDICATED THE SURGEON IMPLANTED A 12.6MM VTICMO12.6 IMPLANTABLE COLLAMER LENS, -16.50/+3.5/089 (SPHERE/CYLINDER/AXIS), IN THE PATIENTS RIGHT EYE (OD), ON (B)(6) 2021. THE LENS WAS REPORTED AS EXCESSIVE VAULTING, ELEVATED INTRAOCULAR PRESSURE (IOP), AND SIGNIFICANT REDUCTION OF IRIDO-CORNEAL ANGLES. TOPICAL ANTIHYPERTENSIVE TREATMENT (KRYTANTEK) WAS ADMINISTERED. TH…	Lens Exchange	Resolved
https://www.accessdata.fda.gov/scripts/cdrh/cfdocs/cfMAUDE/Detail.CFM?MDRFOI__ID=11624856&pc=QCB	2023826-2021-00934	2020-12-10 05:00:00	Injury	STAAR SURGICAL COMPANY	2021-04-06 04:00:00	QCB	IMPLANTABLE COLLAMER LENS (ICL)	Inadequacy of Device Shape and/or Size	Intraocular Pressure Increased; Appropriate Clinical Signs, Symptoms, Conditions Term / Code Not Available	NA	NA	1	Event Description: THE REPORTER INDICATED THAT A 12.6MM, VTICM012.6, -17.50/1.5/095 (SPHERE/CYLINDER/AXIS), IMPLANTABLE COLLAMER LENS WAS IMPLANTED INTO THE PATIENTS LEFT EYE (OS) ON (B)(6) 2020. LOW VAULT, ELEVATED IOP, SIGNIFICANT REDUCTION OF IRIDO-CORNEAL ANGLES, AND PIGMENT DISPERSION WAS OBSERVED. ON PATIENTS LAST VISIT DATE (B)(6) 2021 FOR STATUS OF THE EYE (SIGNS/SYMPTOMS) " VISION IS EXC…	Lens Retention	Resolved
https://www.accessdata.fda.gov/scripts/cdrh/cfdocs/cfMAUDE/Detail.CFM?MDRFOI__ID=11648783&pc=QCB	2023826-2021-00923	2021-03-12 05:00:00	Injury	STAAR SURGICAL COMPANY	2021-04-12 04:00:00	QCB	IMPLANTABLE COLLAMER LENS (ICL)	Off-Label Use; Inadequacy of Device Shape and/or Size	Intraocular Pressure Increased; Appropriate Clinical Signs, Symptoms, Conditions Term / Code Not Available	NA	NA	1	Event Description: THE REPORTER INDICATED THE SURGEON IMPLANTED A 12.6MM VTICMO12.6 IMPLANTABLE COLLAMER LENS, -16.00/+3.5/094 (SPHERE/CYLINDER/AXIS), IN THE PATIENTS LEFT EYE (OS), ON (B)(6) 2021. THE LENS WAS REPORTED AS EXCESSIVE VAULTING, ELEVATED INTRAOCULAR PRESSURE (IOP), AND SIGNIFICANT REDUCTION OF IRIDO-CORNEAL ANGLES. TOPICAL ANTIHYPERTENSIVE TREATMENT (KRYTANTEK) WAS ADMINISTERED. THE…	Lens Exchange	Resolved
https://www.accessdata.fda.gov/scripts/cdrh/cfdocs/cfMAUDE/Detail.CFM?MDRFOI__ID=11722521&pc=QCB	2023826-2021-01209	2021-03-10 05:00:00	Injury	STAAR SURGICAL COMPANY	2021-04-26 04:00:00	QCB	IMPLANTABLE COLLAMER LENS (ICL)	Inadequacy of Device Shape and/or Size	Intraocular Pressure Increased; Appropriate Clinical Signs, Symptoms, Conditions Term / Code Not Available	NA	NA	1	Event Description: THE REPORTER INDICATED THAT A 13.2MM, VTICM5_13.2, -12.00/+0.5/164 (SPHERE/CYLINDER/AXIS), IMPLANTABLE COLLAMER LENS WAS IMPLANTED INTO THE PATIENTS RIGHT EYE (OD) ON (B)(6) 2021. ON (B)(6) 2021 THE LENS WAS EXCHANGED FOR A SHORTER LENGTH, -11.50 DIOPTER, SPHERICAL LENS DUE TO EXCESSIVE VAULT, ELEVATED IOP AND UNREACTIVE PUPIL (PUPIL IS REACTIVE TO LIGHT BUT VERY DILATED). FOR …	Lens Exchange	Unknown
https://www.accessdata.fda.gov/scripts/cdrh/cfdocs/cfMAUDE/Detail.CFM?MDRFOI__ID=11780620&pc=QCB	2023826-2021-01371	2021-03-26 04:00:00	Injury	STAAR SURGICAL COMPANY	2021-05-05 04:00:00	QCB	IMPLANTABLE COLLAMER LENS (ICL)	Off-Label Use; Inadequacy of Device Shape and/or Size	Intraocular Pressure Increased; Appropriate Clinical Signs, Symptoms, Conditions Term / Code Not Available	NA	NA	1	Event Description: THE REPORTER INDICATED THE SURGEON IMPLANTED A 13.2MM VTICM5_13.2 IMPLANTABLE COLLAMER LENS, -03.50/+6.0/084 (SPHERE/CYLINDER/AXIS), IN THE PATIENTS LEFT EYE (OS), ON (B)(6) 2021. THE LENS WAS EXPLANTED ON (B)(6) 2021 DUE TO EXCESSIVE VAULTING, ELEVATED INTRAOCULAR PRESSURE (IOP) AND SIGNIFICANT REDUCTION OF IRIDO-CORNEAL ANGLES (THE IRIS WAS TOUCHING THE CORNEA). ANOTHER ICL L…	Lens Extraction	Unknown
https://www.accessdata.fda.gov/scripts/cdrh/cfdocs/cfMAUDE/Detail.CFM?MDRFOI__ID=11780627&pc=QCB	2023826-2021-01370	2021-03-26 04:00:00	Injury	STAAR SURGICAL COMPANY	2021-05-05 04:00:00	QCB	IMPLANTABLE COLLAMER LENS (ICL)	Off-Label Use; Inadequacy of Device Shape and/or Size	Intraocular Pressure Increased; Appropriate Clinical Signs, Symptoms, Conditions Term / Code Not Available	NA	NA	1	Event Description: THE REPORTER INDICATED THE SURGEON IMPLANTED A 13.2MM VTICM5_13.2 IMPLANTABLE COLLAMER LENS, -03.00/+6.0/116 (SPHERE/CYLINDER/AXIS), IN THE PATIENTS RIGHT EYE (OD), ON (B)(6) 2021. THE LENS WAS EXPLANTED ON (B)(6) 2021 DUE TO EXCESSIVE VAULTING, ELEVATED INTRAOCULAR PRESSURE (IOP) AND SIGNIFICANT REDUCTION OF IRIDO-CORNEAL ANGLES (THE IRIS WAS TOUCHING THE CORNEA). ANOTHER ICL …	Lens Extraction	Unknown
https://www.accessdata.fda.gov/scripts/cdrh/cfdocs/cfMAUDE/Detail.CFM?MDRFOI__ID=11796745&pc=QCB	2023826-2021-01390	2021-04-05	Injury	STAAR SURGICAL COMPANY	2021-05-10	QCB	IMPLANTABLE COLLAMER LENS (ICL)	Adverse Event Without Identified Device or Use Problem	Intraocular Pressure Increased; Appropriate Clinical Signs, Symptoms, Conditions Term / Code Not Available	P990013	NA	1	Event Description: IT WAS REPORTED THAT A 13.2MM, TMICL13.2, -16/2/90 (SPHERE/CYLINDER/AXIS), IMPLANTABLE COLLAMER LENS WAS IMPLANTED INTO THE PATIENTS RIGHT EYE (OD) ON (B)(6) 2021. ON (B)(6) 2021 THE LENS WAS EXPLANTED DUE TO ELEVATED IOP AND ANGLE CLOSURE. ADDITIONAL SURGICAL INTERVENTION (AQUEOUS TAP AND ENLARGEMENT OF PI YAG LASER) AND MEDICAL INTERVENTION (IOP LOWERING MEDICATION) WERE PERF…	Lens Extraction + Secondary Operation	Resolved
https://www.accessdata.fda.gov/scripts/cdrh/cfdocs/cfMAUDE/Detail.CFM?MDRFOI__ID=11796748&pc=QCB	2023826-2021-01391	2021-04-05	Injury	STAAR SURGICAL COMPANY	2021-05-10	QCB	IMPLANTABLE COLLAMER LENS (ICL)	Adverse Event Without Identified Device or Use Problem	Intraocular Pressure Increased; Appropriate Clinical Signs, Symptoms, Conditions Term / Code Not Available	P990013	NA	1	Event Description: IT WAS REPORTED THAT A 13.2MM, TMICL13.2, -17.5/3.0/061 (SPHERE/CYLINDER/AXIS), IMPLANTABLE COLLAMER LENS WAS IMPLANTED INTO THE PATIENTS LEFT EYE (OS) ON (B)(6) 2021. ON (B)(6) 2021 THE LENS WAS EXPLANTED DUE TO ELEVATED IOP AND ANGLE CLOSURE. ADDITIONAL SURGICAL INTERVENTION (AQUEOUS TAP AND ENLARGEMENT OF PI YAG LASER) AND MEDICAL INTERVENTION (IOP LOWERING MEDICATION) WERE …	Lens Extraction + Secondary Operation	Resolved
https://www.accessdata.fda.gov/scripts/cdrh/cfdocs/cfMAUDE/Detail.CFM?MDRFOI__ID=11855173&pc=QCB	2023826-2021-01511	2021-04-21	Malfunction	STAAR SURGICAL COMPANY	2021-05-20	QCB	IMPLANTABLE COLLAMER LENS (ICL)	Inadequacy of Device Shape and/or Size	Intraocular Pressure Increased; Appropriate Clinical Signs, Symptoms, Conditions Term / Code Not Available	N/A	NA	1	Event Description: THE REPORTER INDICATED THAT THE SURGEON IMPLANTED A 13.2MM VTICM5_13.2, -11.00/1.5/093 (SPHERE/CYLINDER/AXIS), IMPLANTABLE COLLAMER LENS INTO THE PATIENT'S RIGHT EYE (OD) ON (B)(6) 2021. ELEVATED IOP(24MMHG) WITHOUT PUPIL BLOCK AND ANGLE CLOSURE WERE ASSESSED ON (B)(6) 2021. SIGNIFICANT REDUCTION OF IRIDO-CORNEAL ANGLES AND PIGMENT DISPERSION WERE OBSERVED. LENS REMAINS IMPLANT…	Lens Exchange	Unknown
https://www.accessdata.fda.gov/scripts/cdrh/cfdocs/cfMAUDE/Detail.CFM?MDRFOI__ID=11855239&pc=QCB	2023826-2021-01522	2021-04-14 04:00:00	Injury	STAAR SURGICAL COMPANY	2021-05-20 04:00:00	QCB	IMPLANTABLE COLLAMER LENS (ICL)	Misfocusing; Inadequacy of Device Shape and/or Size	Intraocular Pressure Increased; Appropriate Clinical Signs, Symptoms, Conditions Term / Code Not Available	P030016	NA	1	Event Description: THE REPORTER INDICATED THAT A 13.2MM, TMICL13.2, -15.00/1.0/066 (SPHERE/CYLINDER/AXIS), IMPLANTABLE COLLAMER LENS WAS IMPLANTED INTO THE PATIENT'S RIGHT EYE (OD) ON (B)(6) 2021. ON (B)(6) 2021 THE LENS WAS EXPLANTED DUE TO PUPIL BLOCK WITH ELEVATED IOP(57MMHG), ANGLE CLOSURE WITH ELEVATED IOP(57MMHG), SIGNIFICANT REDUCTION OF IRIDO-CORNEAL ANGLES, TRANSIENT LOSS OF BCVA, EXCESS…	Lens Extraction	Unknown
https://www.accessdata.fda.gov/scripts/cdrh/cfdocs/cfMAUDE/Detail.CFM?MDRFOI__ID=11894540&pc=QCB	2023826-2021-01710	NA	Injury	STAAR SURGICAL COMPANY	2021-05-27 04:00:00	QCB	IMPLANTABLE COLLAMER LENS (ICL)	Inadequacy of Device Shape and/or Size; Adverse Event Without Identified Device or Use Problem; Unintended Movement	Intraocular Pressure Increased; Appropriate Clinical Signs, Symptoms, Conditions Term / Code Not Available	P030016	NA	1	Event Description: THE REPORTER INDICATED THE SURGEON IMPLANTED 12.6MM TMICL12.6 IMPLANTABLE COLLAMER LENS, -12.0/+4.0/088 (SPHERE/CYLINDER/AXIS) INTO THE PATIENTS RIGHT EYE (OD). THE SURGEON REPORTS ELEVATED IOP. REPORTEDLY, INCREASED LASER ENERGY WAS APPLIED AND A 2ND MID PERIPHERAL PI WAS PERFORMED. PROBLEM RESOLVED. THE ELEVATED IOP WAS RELATED TO A NON PATENT SUPER PERIPHERAL PI. Manufacture…	Lens Exchange + Secondary Operation	Unknown
https://www.accessdata.fda.gov/scripts/cdrh/cfdocs/cfMAUDE/Detail.CFM?MDRFOI__ID=11938946&pc=QCB	2023826-2021-01644	2021-02-09	Injury	STAAR SURGICAL COMPANY	2021-06-04	QCB	IMPLANTABLE COLLAMER LENS (ICL)	Inadequacy of Device Shape and/or Size	Intraocular Pressure Increased; Appropriate Clinical Signs, Symptoms, Conditions Term / Code Not Available	N/A	NA	1	Event Description: THE REPORTER INDICATED THAT THE SURGEON IMPLANTED A 13.2MM VTICM5_13.2, -9.00/2.0/084 (SPHERE/CYLINDER/AXIS), IMPLANTABLE COLLAMER LENS INTO THE PATIENT'S RIGHT EYE (OD) ON (B)(6) 2021. THE LENS WAS EXCHANGED WITH A SHORTER LENGTH LENS DUE TO PUPIL BLOCK WITH ELEVATED IOP(75MMHG,ASSESSED ON (B)(6) 2021), SIGNIFICANT REDUCTION OF IRIDO-CORNEAL ANGLES, AND EXCESSIVE VAULT ON (B)(…	Lens Exchange	Resolved
https://www.accessdata.fda.gov/scripts/cdrh/cfdocs/cfMAUDE/Detail.CFM?MDRFOI__ID=11938953&pc=QCB	2023826-2021-01645	2021-02-09	Injury	STAAR SURGICAL COMPANY	2021-06-04	QCB	IMPLANTABLE COLLAMER LENS (ICL)	Inadequacy of Device Shape and/or Size	Intraocular Pressure Increased; Appropriate Clinical Signs, Symptoms, Conditions Term / Code Not Available	N/A	NA	1	Event Description: THE REPORTER INDICATED THAT THE SURGEON IMPLANTED A 13.2MM VTICM5_13.2, -7.00/1.0/084 (SPHERE/CYLINDER/AXIS), IMPLANTABLE COLLAMER LENS INTO THE PATIENT'S LEFT EYE (OS) ON (B)(6) 2021. THE LENS WAS EXCHANGED WITH A SHORTER LENGTH LENS DUE TO PUPIL BLOCK WITH ELEVATED IOP (75MMHG,ASSESSED ON (B)(6) 2021), SIGNIFICANT REDUCTION OF IRIDO-CORNEAL ANGLES, AND EXCESSIVE VAULT ON (B)(…	Lens Exchange	Resolved
https://www.accessdata.fda.gov/scripts/cdrh/cfdocs/cfMAUDE/Detail.CFM?MDRFOI__ID=11966819&pc=QCB	2023826-2021-01819	2021-05-12	Injury	STAAR SURGICAL COMPANY	2021-06-09	QCB	IMPLANTABLE COLLAMER LENS (ICL)	Inadequacy of Device Shape and/or Size	Intraocular Pressure Increased; Appropriate Clinical Signs, Symptoms, Conditions Term / Code Not Available	N/A	NA	1	Event Description: THE REPORTER INDICATED THAT THE SURGEON IMPLANTED A 13.2MM VTICH3.2, -10.00/3.0/014 (SPHERE/CYLINDER/AXIS), IMPLANTABLE COLLAMER LENS INTO THE PATIENT'S LEFT EYE (OS) ON (B)(6)2021. ANGLE CLOSURE WITH ELEVATED IOP(64MMHG ASSESSED ON (B)(6) 2021) AND EXCESSIVE VAULT WERE OBSERVED. ADDITION OF NEW PI, AND YAG PERFORMED ON (B)(6) 2021. LENS REMAINS IMPLANTED. CAUSE OF THE EVENT IS…	Lens Retention + Secondary Operation	Unknown
https://www.accessdata.fda.gov/scripts/cdrh/cfdocs/cfMAUDE/Detail.CFM?MDRFOI__ID=11966836&pc=QCB	2023826-2021-01818	2021-05-12	Injury	STAAR SURGICAL COMPANY	2021-06-09	QCB	IMPLANTABLE COLLAMER LENS (ICL)	Inadequacy of Device Shape and/or Size	Intraocular Pressure Increased; Appropriate Clinical Signs, Symptoms, Conditions Term / Code Not Available	N/A	NA	1	Event Description: THE REPORTER INDICATED THAT THE SURGEON IMPLANTED A 13.2MM VTICH3.2, -10.00/2.0/024 (SPHERE/CYLINDER/AXIS), IMPLANTABLE COLLAMER LENS INTO THE PATIENT'S RIGHT EYE (OD) ON (B)(6) 2021. ANGLE CLOSURE WITH ELEVATED IOP(76MMHG ASSESSED ON (B)(6) 2021) AND EXCESSIVE VAULT WERE OBSERVED. ENLARGEMENT OF PI, ADDITION OF NEW PI, AND YAG PERFORMED ON (B)(6) 2021. LENS REMAINS IMPLANTED. …	Lens Retention + Secondary Operation	Unknown
https://www.accessdata.fda.gov/scripts/cdrh/cfdocs/cfMAUDE/Detail.CFM?MDRFOI__ID=12170834&pc=QCB	2023826-2021-02603	2021-02-25 05:00:00	Injury	STAAR SURGICAL COMPANY	2021-07-14 04:00:00	QCB	IMPLANTABLE COLLAMER LENS (ICL)	Off-Label Use; Inadequacy of Device Shape and/or Size	Intraocular Pressure Increased; Appropriate Clinical Signs, Symptoms, Conditions Term / Code Not Available	NA	NA	1	Event Description: THE REPORTER INDICATED THAT A 13.2MM, VTICMO13.2, -12.5/2.0/095 (SPHERE/CYLINDER/AXIS), IMPLANTABLE COLLAMER LENS WAS IMPLANTED INTO THE PATIENTS RIGHT EYE (OD) ON (B)(6) 2021. ON (B)(6) 2021 THE LENS WAS EXPLANTED DUE TO EXCESSIVE VAULT, ELEVATED IOP AND SIGNIFICANT REDUCTION OF IRIDO-CORNEAL ANGLES. THIS EXPLANT RESOLVED THE PROBLEM. CAUSE OF THIS EVENT WAS UNKNOWN. Manufactu…	Lens Extraction	Resolved
https://www.accessdata.fda.gov/scripts/cdrh/cfdocs/cfMAUDE/Detail.CFM?MDRFOI__ID=12170835&pc=QCB	2023826-2021-02602	2021-02-25 05:00:00	Injury	STAAR SURGICAL COMPANY	2021-07-14 04:00:00	QCB	IMPLANTABLE COLLAMER LENS (ICL)	Off-Label Use; Inadequacy of Device Shape and/or Size	Intraocular Pressure Increased; Appropriate Clinical Signs, Symptoms, Conditions Term / Code Not Available	NA	NA	1	Event Description: THE REPORTER INDICATED THAT A 12.6MM, VTICMO12.6, -10.5/1.0/85 (SPHERE/CYLINDER/AXIS), IMPLANTABLE COLLAMER LENS WAS IMPLANTED INTO THE PATIENTS LEFT EYE (OS) ON (B)(6) 2021. ON (B)(6) 2021 THE LENS WAS EXPLANTED DUE TO EXCESSIVE VAULT, ELEVATED IOP AND SIGNIFICANT REDUCTION OF IRIDO-CORNEAL ANGLES. THIS EXPLANT RESOLVED THE PROBLEM. CAUSE OF THIS EVENT WAS UNKNOWN. Manufacture…	Lens Extraction	Resolved
https://www.accessdata.fda.gov/scripts/cdrh/cfdocs/cfMAUDE/Detail.CFM?MDRFOI__ID=12178448&pc=QCB	2023826-2021-02701	2021-06-11 04:00:00	Injury	STAAR SURGICAL COMPANY	2021-07-15 04:00:00	QCB	IMPLANTABLE COLLAMER LENS	Inadequacy of Device Shape and/or Size	Intraocular Pressure Increased; Appropriate Clinical Signs, Symptoms, Conditions Term / Code Not Available	P030016	NA	1	Event Description: THE REPORTER INDICATED THAT THE SURGEON IMPLANTED A 13.2MM TMICL13.2 IMPLANTABLE COLLAMER LENS -16.0/+1.0/029 (SPHERE/CYLINDER/AXIS) INTO THE PATIENT'S RIGHT (OD) EYE ON (B)(6) 2021. ON (B)(6) 2021 THE LENS WAS EXPLANTED DUE TO EXCESSIVE VAULT, ANGLE CLOSURE, AND ELEVATED IOP. THE CAUSE OF THE EVENT IS REPORTED AS DEVICE: "DEVICE BEING TOO LARGE CAUSED ANTERIOR VAULT, RESULTING…	Lens Exchange	Resolved
https://www.accessdata.fda.gov/scripts/cdrh/cfdocs/cfMAUDE/Detail.CFM?MDRFOI__ID=12214185&pc=QCB	2023826-2021-02636	2021-05-24	Injury	STAAR SURGICAL COMPANY	2021-07-22	QCB	IMPLANTABLE COLLAMER LENS (ICL)	Inadequacy of Device Shape and/or Size	Intraocular Pressure Increased; Appropriate Clinical Signs, Symptoms, Conditions Term / Code Not Available	N/A	NA	1	Event Description: THE REPORTER INDICATED THAT THE SURGEON IMPLANTED A 13.2MM VTICMO13.2, -8.50/1.0/091 (SPHERE/CYLINDER/AXIS), IMPLANTABLE COLLAMER LENS INTO THE PATIENT'S RIGHT EYE (OD) ON (B)(6) 2021. THE LENS WAS EXPLANTED DUE TO ELEVATED IOP(26.7MMHG) WITHOUT PUPIL BLOCK AND ANGLE CLOSURE(ASSESSED ON (B)(6) 2021), SIGNIFICANT REDUCTION OF IRIDO-CORNEAL ANGLES, AND EXCESSIVE VAULT ON (B)(6) 2…	Lens Exchange	Resolved
https://www.accessdata.fda.gov/scripts/cdrh/cfdocs/cfMAUDE/Detail.CFM?MDRFOI__ID=12214348&pc=QCB	2023826-2021-02679	2021-06-24 04:00:00	Injury	STAAR SURGICAL COMPANY	2021-07-22 04:00:00	QCB	IMPLANTABLE COLLAMER LENS (ICL)	Misfocusing; Inadequacy of Device Shape and/or Size	Intraocular Pressure Increased; Appropriate Clinical Signs, Symptoms, Conditions Term / Code Not Available	N/A	NA	1	Event Description: THE REPORTER INDICATED THAT A 13.2MM, VTICM5_13.2, -2.50/3.5/044 (SPHERE/ CYLINDER/AXIS), IMPLANTABLE COLLAMER LENS WAS IMPLANTED INTO THE PATIENT'S LEFT EYE (OS) ON (B)(6) 2021. PUPIL BLOCK WITH ELEVATED IOP (65MMHG) WAS ASSESSED ON (B)(6) 2021. EXCESSIVE VAULT WAS OBSERVED. MEDICATION PRESCRIBED. LENS REMAINS IMPLANTED. CAUSE OF THE EVENT IS REPORTED AS DEVICE AND PATIENT REL…	Lens Retention	Not_Resolved
https://www.accessdata.fda.gov/scripts/cdrh/cfdocs/cfMAUDE/Detail.CFM?MDRFOI__ID=12228684&pc=QCB	2023826-2021-02916	2021-07-16 04:00:00	Injury	STAAR SURGICAL COMPANY	2021-07-27 04:00:00	QCB	IMPLANTABLE COLLAMER LENS (ICL)	Off-Label Use; Inadequacy of Device Shape and/or Size	Intraocular Pressure Increased; Appropriate Clinical Signs, Symptoms, Conditions Term / Code Not Available	NA	NA	1	Event Description: THE REPORTER INDICATED THAT THE SURGEON IMPLANTED A 12.6MM VTICM5_12.6; -13.00/+3.0/084 (SPHERE/CYLINDER/AXIS) IMPLANTABLE COLLAMER LENS INTO THE PATIENT'S LEFT EYE (OS) ON (B)(6) 2021. THE PATIENT EXPERIENCED EXCESSIVE VAULTING; ELEVATED INTRAOCULAR PRESSURE; SIGNIFICANT REDUCTION OF IRIDO-CORNEAL ANGLES AND IT WAS NOTED VISCOELASTIC WAS DRAINED IN A SEPARATE SURGERY ON (B)(6)…	Lens Exchange + Secondary Operation	Resolved
https://www.accessdata.fda.gov/scripts/cdrh/cfdocs/cfMAUDE/Detail.CFM?MDRFOI__ID=12264140&pc=QCB	2023826-2021-03041	2021-05-27 04:00:00	Injury	STAAR SURGICAL COMPANY	2021-08-02 04:00:00	QCB	IMPLANTABLE COLLAMER LENS (ICL)	Inadequacy of Device Shape and/or Size; Patient-Device Incompatibility	Intraocular Pressure Increased; Appropriate Clinical Signs, Symptoms, Conditions Term / Code Not Available	NA	NA	1	Event Description: THE REPORTER INDICATED THAT THE SURGEON IMPLANTED A 13.2MM VTICM5_13.2; -13/+1.5/93 (SPHERE/CYLINDER/AXIS) IMPLANTABLE COLLAMER LENS INTO THE PATIENT'S LEFT EYE (OS) ON (B)(6)-2021. THE SURGEON REPORTS EXCESSIVE VAULTING; ELEVATED INTRAOCULAR PRESSURE; SIGNIFICANT REDUCTION OF IRIDO-CORNEAL ANGLES; AND TOPICAL TREATMENT (PROSTAGLANDIN DROPS) WERE USED. THE SURGEON NOTED A REPLA…	Lens Exchange	Resolved
https://www.accessdata.fda.gov/scripts/cdrh/cfdocs/cfMAUDE/Detail.CFM?MDRFOI__ID=12406884&pc=QCB	2023826-2021-03327	2021-06-16	Injury	STAAR SURGICAL COMPANY	2021-09-01	QCB	IMPLANTABLE COLLAMER LENS (ICL)	Inadequacy of Device Shape and/or Size	Intraocular Pressure Increased; Appropriate Clinical Signs, Symptoms, Conditions Term / Code Not Available	N/A	NA	1	Event Description: THE REPORTER INDICATED THAT THE SURGEON IMPLANTED A 13.2MM VTICMO13.2, -6.50/1.0/095 (SPHERE/ CYLINDER/ AXIS), IMPLANTABLE COLLAMER LENS INTO THE PATIENT'S LEFT EYE (OS) ON (B)(6) 2021. THE LENS WAS REPLACED WITH A SHORTER LENGTH LENS DUE TO ELEVATED IOP (35MMHG) WITHOUT PUPIL BLOCK AND ANGLE CLOSURE (ASSESED ON (B)(6) 2021), SIGNIFICANT REDUCTION OF IRIDO-CORNEAL ANGLES, AND E…	Lens Exchange	Resolved
https://www.accessdata.fda.gov/scripts/cdrh/cfdocs/cfMAUDE/Detail.CFM?MDRFOI__ID=12478337&pc=QCB	2023826-2021-03586	2021-08-13	Injury	STAAR SURGICAL COMPANY	2021-09-15	QCB	IMPLANTABLE COLLAMER LENS (ICL)	Inadequacy of Device Shape and/or Size	Intraocular Pressure Increased; Appropriate Clinical Signs, Symptoms, Conditions Term / Code Not Available	P030016	NA	1	Event Description: THE REPORTER INDICATED THAT A 13.3MM, TMICL13.2, -6.5/2.5/91, IMPLANTABLE COLLAMER LENS WAS IMPLANTED INTOT THE PATIENTS RIGHT EYE (OD) ON (B)(6) 2021. EXCESSIVE VAULT AND ANGLE CLOSURE WITH ELEVATED IOP WAS OBSERVED. IT WAS REPPORTED THAT MEDICAL OR SURGICAL INTERVENTION WAS REQUIRED. AC WASHOUT, VRT TAP AND SUTURE WOUND WAS REPORTED TO BE PERFORMED ON (B)(6) 2021. ON (B)(6) 2…	Lens Exchange	Unknown
https://www.accessdata.fda.gov/scripts/cdrh/cfdocs/cfMAUDE/Detail.CFM?MDRFOI__ID=12502723&pc=QCB	2023826-2021-03578	NA	Injury	STAAR SURGICAL COMPANY	2021-09-20	QCB	IMPLANTABLE COLLAMER LENS (ICL)	Adverse Event Without Identified Device or Use Problem	Intraocular Pressure Increased; Appropriate Clinical Signs, Symptoms, Conditions Term / Code Not Available	NA	NA	1	Event Description: THE REPORTER INDICATED THE SURGEON IMPLANTED A 13.2MM VTICM5_13.2 IMPLANTABLE COLLAMER LENS, -10.00/+2.0/088, INTO THE PATIENTS RIGHT EYE (OD) ON (B)(6) 2021. THE LENS WAS EXPLANTED ON (B)(6) 2021 DUE TO ELEVATED INTRAOCULAR PRESSURE AND SIGNIFICANT REDUCTION OF IRIDO-CORNEAL ANGLES. THE SURGEON DID NOT IMPLANT ANOTHER ICL LENS. POST-OP, AFTER LENS WAS EXPLANTED, PATIENT HAD FI…	Lens Extraction	Unknown
https://www.accessdata.fda.gov/scripts/cdrh/cfdocs/cfMAUDE/Detail.CFM?MDRFOI__ID=12558563&pc=QCB	2023826-2021-03805	NA	Injury	STAAR SURGICAL COMPANY	2021-09-30	QCB	IMPLANTABLE COLLAMER LENS (ICL)	Off-Label Use; Adverse Event Without Identified Device or Use Problem	Intraocular Pressure Increased; Appropriate Clinical Signs, Symptoms, Conditions Term / Code Not Available	NA	NA	1	Event Description: THE REPORTER INDICATED THAT THE SURGEON IMPLANTED A 12.6MM VTICMO12.6 IMPLANTABLE COLLAMER LENS, -9.5/+3.0/086 (SPHERE/CYLINDER/AXIS) INTO THE PATIENT'S RIGHT EYE (OD) ON (B)(6)2021. THE SURGEON REPORTS INTERMITTENT ANGLE CLOSURE WITH INCREASED IOP, PLATEAU IRIS, AND LOW-DOSE PILO ADMINISTRATION. REPORTEDLY THE VISION IS GOOD AND PATIENT DOES NOT WANT TO REMOVE THE LENS; LENS R…	Lens Retention	Unknown
https://www.accessdata.fda.gov/scripts/cdrh/cfdocs/cfMAUDE/Detail.CFM?MDRFOI__ID=12910019&pc=QCB	2023826-2021-04438	2021-11-09 05:00:00	Injury	STAAR SURGICAL COMPANY	2021-12-01 05:00:00	QCB	IMPLANTABLE COLLAMER LENS (ICL)	Inadequacy of Device Shape and/or Size	Intraocular Pressure Increased; Appropriate Clinical Signs, Symptoms, Conditions Term / Code Not Available	NA	NA	1	Event Description: THE REPORTER INDICATED THAT A 13.2MM, VTICM513.2, -12.50/1.50/93 (SPHERE/CYLINDER/AXIS), IMPLANTABLE COLLAMER LENS WAS IMPLANTED INTO THE PATIENTS LEFT EYE (OS) ON (B)(6) 2021. ON (B)(6) 2021 THE LENS WAS EXCHANGED FOR A SHORTER LENGTH LENS DUE TO EXCESSIVE VAULT; ELEVATED IOP WITHOUT PUPIL BLOCK AND ANGLE CLOSURE. THIS EXCHANGE RESOLVED THE PROBLEM. CAUSE OF EVENT WAS REPORTED…	Lens Exchange	Resolved
https://www.accessdata.fda.gov/scripts/cdrh/cfdocs/cfMAUDE/Detail.CFM?MDRFOI__ID=12993610&pc=QCB	2023826-2021-04882	2021-11-15 05:00:00	Injury	STAAR SURGICAL COMPANY	2021-12-14 05:00:00	QCB	IMPLANTABLE COLLAMER LENS (ICL)	Inadequacy of Device Shape and/or Size	Intraocular Pressure Increased; Appropriate Clinical Signs, Symptoms, Conditions Term / Code Not Available	NA	NA	1	Event Description: THE REPORTER INDICATED THAT THE SURGEON IMPLANTED A 13.2MM TMICL13.2; -10.5/2.0/092 (SPHERE/CYLINDER/AXIS) IMPLANTABLE COLLAMER LENS INTO THE PATIENT'S LEFT EYE (OS) ON (B)(6) 2021. ON (B)(6) 2021 THE LENS WAS EXCHANGED WITH A SHORTER LENGTH LENS DUE TO EXCESSIVE VAULTING; PUPIL BLOCK WITH ELEVATED INTRAOCULAR PRESSURE. THIS RESOLVED THE PROBLEM. THE CAUSE OF THE EVENT WAS REPO…	Lens Exchange	Resolved
https://www.accessdata.fda.gov/scripts/cdrh/cfdocs/cfMAUDE/Detail.CFM?MDRFOI__ID=13385990&pc=QCB	2023826-2022-00337	2022-01-03 05:00:00	Injury	STAAR SURGICAL COMPANY	2022-01-28 05:00:00	QCB	IMPLANTABLE COLLAMER LENS (ICL)	Inadequacy of Device Shape and/or Size	Intraocular Pressure Increased; Appropriate Clinical Signs, Symptoms, Conditions Term / Code Not Available	P030016	NA	1	Event Description: THE REPORTER INDICATED THAT THE SURGEON IMPLANTED A 13.2MM TMICL13.2 LENS, -15.0/+1.0/036 (SPHERE/CYLINDER/AXIS) INTO THE PATIENT'S LEFT (OS) EYE ON (B)(6) 2022. ON (B)(6) 2022 THE LENS WAS EXCHANGED WITH A SHORTER LENS DUE TO EXCESSIVE VAULT, ELEVATED IOP, AND NARROW ANGLES. THE PROBLEM IS RESOLVED.Event Description: THE REPORTER INDICATED THAT THE SURGEON IMPLANTED A 13.2MM T…	Lens Exchange	Resolved
https://www.accessdata.fda.gov/scripts/cdrh/cfdocs/cfMAUDE/Detail.CFM?MDRFOI__ID=13385991&pc=QCB	2023826-2022-00339	NA	Injury	STAAR SURGICAL COMPANY	2022-01-28 05:00:00	QCB	IMPLANTABLE COLLAMER LENS (ICL)	Adverse Event Without Identified Device or Use Problem	Intraocular Pressure Increased; Appropriate Clinical Signs, Symptoms, Conditions Term / Code Not Available	NA	NA	1	Event Description: THE REPORTER INDICATED THAT THE SURGEON IMPLANTED A 13.2MM VTICMO13.2 IMPLANTABLE COLLAMER LENS, -17.0/+2.5/113 (SPHERE/CYLINDER/AXIS) INTO THE PATIENT'S RIGHT EYE (OD) ON (B)(6) 2021. ON (B)(6) 2021 THE LENS WAS EXPLANTED DUE TO ELEVATED IOP. REPORTEDLY, "THE PATIENT HAS EYE PRESSURE IN SPITE OF ALL OCULAR TREATMENT." AFTER REMOVAL, THE EYE PRESSURE IS STABLE BUT THE PUPIL IS …	Lens Extraction	Resolved
https://www.accessdata.fda.gov/scripts/cdrh/cfdocs/cfMAUDE/Detail.CFM?MDRFOI__ID=13423368&pc=QCB	2023826-2022-00265	2021-12-21 05:00:00	Injury	STAAR SURGICAL COMPANY	2022-02-02 05:00:00	QCB	IMPLANTABLE COLLAMER LENS (ICL)	Off-Label Use; Inadequacy of Device Shape and/or Size	Intraocular Pressure Increased; Appropriate Clinical Signs, Symptoms, Conditions Term / Code Not Available	N/A	NA	1	Event Description: THE REPORTER INDICATED THAT THE SURGEON IMPLANTED A 13.2MM VTICMO13.2, -11.50/2.5/113 (SPHERE/CYLINDER/AXIS), IMPLANTABLE COLLAMER LENS INTO THE PATIENT'S RIGHT EYE (OD) ON (B)(6) 2021. THE LENS WAS REMOVED ON (B)(6) 2021 DUE TO ELEVATED IOP (21.3MMHG) WITHOUT PUPIL BLOCK AND ANGLE CLOSURE, SIGNIFICANT REDUCTION OF IRIDO-CORNEAL ANGLES, AND EXCESSIVE VAULT. A SHORTER LENGTH LEN…	Lens Exchange	Resolved
https://www.accessdata.fda.gov/scripts/cdrh/cfdocs/cfMAUDE/Detail.CFM?MDRFOI__ID=13518185&pc=QCB	2023826-2022-00479	2022-01-12 05:00:00	Injury	STAAR SURGICAL COMPANY	2022-02-11 05:00:00	QCB	IMPLANTABLE COLLAMER LENS (ICL)	Inadequacy of Device Shape and/or Size	Intraocular Pressure Increased; Appropriate Clinical Signs, Symptoms, Conditions Term / Code Not Available	NA	NA	1	Event Description: THE REPORTER INDICATED THAT THE SURGEON IMPLANTED A 13.2MM VTICM5_13.2; -8.00/+1.0/180 (SPHERE/CYLINDER/AXIS) IMPLANTABLE COLLAMER LENS INTO THE PATIENT'S RIGHT EYE (OD) ON (B)(6) 2022. THE PATIENT EXPERIENCED EXCESSIVE VAULTING; ANGLE CLOSURE WITH ELEVATED INTRAOCULAR PRESSURE AND ON (B)(6) 2022 THE LENS WAS EXPLANTED. THE CAUSE OF THE EVENT WAS REPORTED AS UNKNOWN. Manufactur…	Lens Extraction	Resolved
https://www.accessdata.fda.gov/scripts/cdrh/cfdocs/cfMAUDE/Detail.CFM?MDRFOI__ID=13538841&pc=QCB	2023826-2022-00512	2022-01-27 05:00:00	Malfunction	STAAR SURGICAL COMPANY	2022-02-15 05:00:00	QCB	IMPLANTABLE COLLAMER LENS (ICL)	Inadequacy of Device Shape and/or Size	Intraocular Pressure Increased; Appropriate Clinical Signs, Symptoms, Conditions Term / Code Not Available	NA	NA	1	Event Description: THE REPORTER INDICATED THAT THE SURGEON IMPLANTED A 12.6MM VTICM5_12.6; -6.50/+2.0/057 (SPHERE/CYLINDER/AXIS) IMPLANTABLE COLLAMER LENS INTO THE PATIENT'S LEFT EYE (OS) ON (B)(6) 2021. THE PATIENT EXPERIENCED EXCESSIVE VAULTING; SIGNIFICANT REDUCTION OF IRIDO-CORNEAL ANGLES; ANGLE CLOSURE; ELEVATED IOP; AND ON (B)(6) 2022 THE LENS WAS EXCHANGED WITH A SHORTER LENGTH LENS. THE C…	Lens Exchange	Unknown
https://www.accessdata.fda.gov/scripts/cdrh/cfdocs/cfMAUDE/Detail.CFM?MDRFOI__ID=13552706&pc=QCB	2023826-2022-00437	2021-12-02 05:00:00	Injury	STAAR SURGICAL COMPANY	2022-02-17 05:00:00	QCB	IMPLANTABLE COLLAMER LENS (ICL)	Off-Label Use; Adverse Event Without Identified Device or Use Problem	Intraocular Pressure Increased; Appropriate Clinical Signs, Symptoms, Conditions Term / Code Not Available	NA	NA	1	Event Description: THE REPORTER INDICATED THE SURGEON IMPLANTED A 13.2MM VTICMO13.2 IMPLANTABLE COLLAMER LENS, -11.00/+2.0/105 (SPHERE/CYLINDER/AXIS), IN THE PATIENTS RIGHT EYE (OD), ON (B)(6) 2021. THE LENS WAS EXPLANTED LATER THAT SAME DAY DUE TO ANGLE CLOSURE WITH ELEVATED INTRAOCULAR PRESSURE (IOP) AND THE PROBLEM WAS RESOLVED. THE CAUSE OF THE EVENT WAS UNKNOWN. Manufacturer Narrative: WEIGH…	Lens Extraction	Resolved
https://www.accessdata.fda.gov/scripts/cdrh/cfdocs/cfMAUDE/Detail.CFM?MDRFOI__ID=13581966&pc=QCB	2023826-2022-00593	2021-12-25 05:00:00	Injury	STAAR SURGICAL COMPANY	2022-02-22 05:00:00	QCB	IMPLANTABLE COLLAMER LENS (ICL)	Inadequacy of Device Shape and/or Size	Intraocular Pressure Increased; Appropriate Clinical Signs, Symptoms, Conditions Term / Code Not Available	NA	NA	1	Event Description: THE REPORTER INDICATED THAT THE SURGEON IMPLANTED A 12.6MM VTICMO12.6; -10.5/1.5/089 (SPHERE/CYLINDER/AXIS) IMPLANTABLE COLLAMER LENS INTO THE PATIENT'S RIGHT EYE (OD) ON (B)(6) 2020. ON (B)(6) 2021 THE LENS WAS EXPLANTED DUE TO EXCESSIVE VAULTING; ANGLE CLOSURE AND INTRAOCULAR PRESSURE. THIS RESOLVED THE PROBLEM. THE CAUSE OF THE EVENT WAS REPORTED AS UNKNOWN. Manufacturer Nar…	Lens Extraction	Resolved
https://www.accessdata.fda.gov/scripts/cdrh/cfdocs/cfMAUDE/Detail.CFM?MDRFOI__ID=13588934&pc=QCB	2023826-2022-00598	2021-12-25 05:00:00	Injury	STAAR SURGICAL COMPANY	2022-02-23 05:00:00	QCB	IMPLANTABLE COLLAMER LENS (ICL)	Inadequacy of Device Shape and/or Size	Intraocular Pressure Increased; Appropriate Clinical Signs, Symptoms, Conditions Term / Code Not Available	NA	NA	1	Event Description: THE REPORTER INDICATED THAT THE SURGEON IMPLANTED A 12.6MM VTICMO12.6; -10.5/2.0/081 (SPHERE/CYLINDER/AXIS) IMPLANTABLE COLLAMER LENS INTO THE PATIENT'S LEFT EYE (OS) ON (B)(6) 2021. ON (B)(6) 2021 THE LENS WAS EXPLANTED DUE TO EXCESSIVE VAULTING AND ANGLE CLOSURE WITH ELEVATED INTRAOCULAR PRESSURE. THIS RESOLVED THE PROBLEM. THE CAUSE OF THE EVENT WAS REPORTED AS UNKNOWN. Manu…	Lens Extraction	Resolved
https://www.accessdata.fda.gov/scripts/cdrh/cfdocs/cfMAUDE/Detail.CFM?MDRFOI__ID=13995866&pc=QCB	2023826-2022-00933	2021-12-21 05:00:00	Injury	STAAR SURGICAL COMPANY	2022-04-04 04:00:00	QCB	IMPLANTABLE COLLAMER LENS (ICL)	Inadequacy of Device Shape and/or Size	Intraocular Pressure Increased; Appropriate Clinical Signs, Symptoms, Conditions Term / Code Not Available	N/A	NA	1	Event Description: THE REPORTER INDICATED THAT THE SURGEON IMPLANTED A 13.2MM VTICMO13.2, -12.0/1.0/088 (SPHERE/CYLINDER/AXIS), IMPLANTABLE COLLAMER LENS INTO THE PATIENT'S LEFT EYE (OS) ON (B)(6)2021. THE LENS WAS REPLACED WITH A SHORTER LENGTH LENS DUE TO EXCESSIVE VAULT, ELEVATED IOP (23.3 MMHG) WITHOUT PUPIL BLOCK AND ANGLE CLOSURE, SIGNIFICANT REDUCTION OF IRIDO-CORNEAL ANGLES ON (B)(6) 2021…	Lens Exchange	Resolved
https://www.accessdata.fda.gov/scripts/cdrh/cfdocs/cfMAUDE/Detail.CFM?MDRFOI__ID=14058325&pc=QCB	2023826-2022-01149	NA	Injury	STAAR SURGICAL COMPANY	2022-04-08 04:00:00	QCB	IMPLANTABLE COLLAMER LENS (ICL)	Adverse Event Without Identified Device or Use Problem	Intraocular Pressure Increased; Appropriate Clinical Signs, Symptoms, Conditions Term / Code Not Available	NA	NA	1	Event Description: THE REPORTER INDICATED THAT THE SURGEON IMPLANTED A 13.2MM VTICMO13.2, -10.5/+3.5/080 (SPHERE/CYLINDER/AXIS) IMPLANTABLE COLLAMER LENS INTO THE PATIENT'S LEFT EYE (OS) ON (B)(6) 2021. THE PATIENT EXPERIENCED ELEVATED INTRAOCULAR PRESSURE AND PIGMENT DISPERSION. IT WAS REPORTER THAT INTRAOCULAR PRESSURE WAS TAPER DOWN TO 12MMHG. PER UPDATED INFORMATION INTRAOCULAR PRESSURE IS CO…	Lens Retention	Unknown
https://www.accessdata.fda.gov/scripts/cdrh/cfdocs/cfMAUDE/Detail.CFM?MDRFOI__ID=14161436&pc=QCB	2023826-2022-01083	2022-02-02 05:00:00	Injury	STAAR SURGICAL COMPANY	2022-04-20 04:00:00	QCB	IMPLANTABLE COLLAMER LENS (ICL)	Inadequacy of Device Shape and/or Size	Intraocular Pressure Increased; Appropriate Clinical Signs, Symptoms, Conditions Term / Code Not Available	N/A	NA	1	Event Description: THE REPORTER INDICATED THAT THE SURGEON IMPLANTED A 13.2MM VTICMO13.2, -17.5/2.0/093 (SPHERE/CYLINDER/AXIS), IMPLANTABLE COLLAMER LENS INTO THE PATIENT'S LEFT EYE (OS) ON (B)(6) 2022. THE LENS WAS REPLACED WITH A SHORTER LENGTH LENS DUE TO ELEVATED IOP(331MMHG) WITHOUT PUPIL BLOCK AND ANGLE CLOSURE (ASSESED ON (B)(6) 2022), SIGNIFICANT REDUCTION OF IRIDO-CORNEAL ANGLES, AND EXC…	Lens Exchange	Resolved
https://www.accessdata.fda.gov/scripts/cdrh/cfdocs/cfMAUDE/Detail.CFM?MDRFOI__ID=14439471&pc=QCB	2023826-2022-01368	2022-03-28 04:00:00	Injury	STAAR SURGICAL COMPANY	2022-05-19 04:00:00	QCB	IMPLANTABLE COLLAMER LENS (ICL)	Inadequacy of Device Shape and/or Size	Intraocular Pressure Increased; Appropriate Clinical Signs, Symptoms, Conditions Term / Code Not Available	NA	NA	1	Event Description: THE REPORTER INDICATED THAT A 13.2MM VTICM5_13.2 -9.00/5.0/075 (SPHERE/CYLINDER/AXIS) IMPLANTABLE COLLAMER LENS WAS IMPLANTED INTO THE PATIENT'S LEFT EYE (OS) ON (B)(6) 2021. EXCESSIVE VAULT; ELEVATED IOP AND SIGNIFICANT REDUCTION OF ICA WERE REPORTED. ANTI GLAUCOMA MEDICATIONS ADMINISTERED TO MAINTAIN NORMAL IOP. ENLARGED PUPIL REACTIVE TO LIGHT; IRIS BOWING; PIGMENTS IN ANTER…	Lens Retention	Unknown
https://www.accessdata.fda.gov/scripts/cdrh/cfdocs/cfMAUDE/Detail.CFM?MDRFOI__ID=14697153&pc=QCB	2023826-2022-01766	2022-04-04 04:00:00	Injury	STAAR SURGICAL COMPANY	2022-06-15 04:00:00	QCB	IMPLANTABLE COLLAMER LENS (ICL)	Inadequacy of Device Shape and/or Size	Intraocular Pressure Increased; Appropriate Clinical Signs, Symptoms, Conditions Term / Code Not Available	P030016	NA	1	Event Description: THE REPORTER INDICATED THAT THE SURGEON IMPLANTED A 13.7MM VTICMO13.7, -15.00/3.5/076 (SPHERE/CYLINDER/AXIS), IMPLANTABLE COLLAMER LENS INTO THE PATIENT'S RIGHT EYE (OD) ON (B)(6) 2022. THE LENS WAS EXPLANTED IN A SECOND SURGERY ON (B)(6) 2022 DUE TO EXCESSIVE VAULT AND ANGLE CLOSURE WITH ELEVATED IOP (45MMHG ASSESSED ON (B)(6) 2022). ON (B)(6) 2022 A SHORTER LENGTH LENS WAS IM…	Lens Exchange	Resolved
https://www.accessdata.fda.gov/scripts/cdrh/cfdocs/cfMAUDE/Detail.CFM?MDRFOI__ID=15168658&pc=QCB	2023826-2022-02589	2022-06-01 04:00:00	Injury	STAAR SURGICAL COMPANY	2022-08-04 04:00:00	QCB	IMPLANTABLE COLLAMER LENS (ICL)	Off-Label Use; Adverse Event Without Identified Device or Use Problem	Intraocular Pressure Increased; Appropriate Clinical Signs, Symptoms, Conditions Term / Code Not Available	P030016	NA	1	Event Description: THE REPORTER INDICATED THAT A 13.2MM VTICM5_13.2 IMPLANTABLE COLLAMER LENS OF -12.5/+2.5/74 (SPHERE/CYLINDER/AXIS) WAS IMPLANTED INTO THE PATIENT'S LEFT EYE (OS) ON (B)(6) 2022. ON (B)(6) 2022 THE LENS WAS EXPLANTED DUE TO ANGLE CLOSURE WITH ELEVATED INTRAOCULAR PRESSURE, UNREACTIVE/FIXED PUPIL AND IRIS ATROPHY. IT WAS REPORTED THAT THE EXPLANT DID NOT RESOLVED THE ISSUE. THE R…	Lens Extraction	Not_Resolved
https://www.accessdata.fda.gov/scripts/cdrh/cfdocs/cfMAUDE/Detail.CFM?MDRFOI__ID=15178277&pc=QCB	2023826-2022-02601	NA	Injury	STAAR SURGICAL COMPANY	2022-08-05 04:00:00	QCB	IMPLANTABLE COLLAMER LENS (ICL)	Adverse Event Without Identified Device or Use Problem	Intraocular Pressure Increased; Appropriate Clinical Signs, Symptoms, Conditions Term / Code Not Available	P030016	NA	1	Event Description: THE REPORTER INDICATED THE SURGEON IMPLANTED A 12.6 MM VTICM5_12.6 IMPLANTABLE COLLAMER LENS, -03.50/+2.0/039 (SPHERE/CYLINDER/AXIS), IN THE PATIENTS RIGHT EYE (OD), ON (B)(6) 2019. AT 3 WEEKS POST-OP IOP WAS ELEVATED TO MID 20'S AND PATIENT WAS STARTED ON TRAVATAN EYEDROP. AT 5 WEEKS POST-OP PRESSURE NORMALISED BUT PATIENT HAD OCULAR SURFACE SIDE EFFECTS FROM EYEDROP. PATIENT …	Lens Extraction + Secondary Operation	Unknown
https://www.accessdata.fda.gov/scripts/cdrh/cfdocs/cfMAUDE/Detail.CFM?MDRFOI__ID=15179016&pc=QCB	2023826-2022-02575	2022-04-12 04:00:00	Injury	STAAR SURGICAL COMPANY	2022-08-05 04:00:00	QCB	IMPLANTABLE COLLAMER LENS (ICL)	Inadequacy of Device Shape and/or Size	Intraocular Pressure Increased; Appropriate Clinical Signs, Symptoms, Conditions Term / Code Not Available	P030016	NA	1	Event Description: THE REPORTER INDICATED THAT A 13.2MM VTICMO13.2 -16.0/1.5/110 (SPHERE/CYLINDER/AXIS), IMPLANTABLE COLLAMER LENS WAS IMPLANTED INTO THE PATIENTS RIGHT EYE (OD) ON (B)(6) 2022. ON (B)(6) 2022 THE LENS WAS EXCHANGED FOR A SHORTER LENGTH LENS DUE TO EXCESSIVE VAULT; ANGLE CLOSURE WITH ELEVATED IOP. THE REPLACEMENT LENS RESOLVED THE PROBLEM. Manufacturer Narrative: (B)(4).	Lens Exchange	Resolved
https://www.accessdata.fda.gov/scripts/cdrh/cfdocs/cfMAUDE/Detail.CFM?MDRFOI__ID=15282214&pc=QCB	2023826-2022-02651	2022-07-27 04:00:00	Injury	STAAR SURGICAL COMPANY	2022-08-24 04:00:00	QCB	IMPLANTABLE COLLAMER LENS (ICL)	Inadequacy of Device Shape and/or Size	Intraocular Pressure Increased; Appropriate Clinical Signs, Symptoms, Conditions Term / Code Not Available	P030016	NA	1	Event Description: THE REPORTER INDICATED THAT THE SURGEON IMPLANTED A 13.2 MM VTICMO13.2, -13.5/2.5/091 (SPHERE/CYLINDER/AXIS), IMPLANTABLE COLLAMER LENS INTO THE PATIENT'S RIGHT EYE (OD) ON (B)(6) 2022. THE LENS WAS REPLACED WITH A SHORTER LENGTH LENS DUE TO SIGNIFICANT REDUCTION OF IRIDO-CORNEAL ANGLES, ANGLE CLOSURE WITH ELEVATED IOP(51 MMHG) ASSESSED ON (B)(6) 2022, AND EXCESSIVE VAULT ON (B…	Lens Exchange	Resolved
https://www.accessdata.fda.gov/scripts/cdrh/cfdocs/cfMAUDE/Detail.CFM?MDRFOI__ID=15477821&pc=QCB	2023826-2022-03263	2022-08-20 04:00:00	Malfunction	STAAR SURGICAL COMPANY	2022-09-24 04:00:00	QCB	IMPLANTABLE COLLAMER LENS (ICL)	Off-Label Use; Inadequacy of Device Shape and/or Size	Intraocular Pressure Increased; Appropriate Clinical Signs, Symptoms, Conditions Term / Code Not Available	P030016	NA	1	Event Description: THE REPORTER INDICATED THAT A 12.6MM VTICMO12.6 IMPLANTABLE COLLAMER LENS -8.0/0.5/090 (SPHERE/CYLINDER/AXIS) WAS IMPLANTED INTO THE PATIENT'S LEFT EYE (OS) ON (B)(6) 2022. THE LENS WAS IMPLANTED, REMOVED AND REPLACED WITH A SHORTER LENGTH LENS INRAOPERATIVELY DUE TO EXCESSIVE VAULT AND ANGLE CLOSURE WITH ELEVATED INTRAOCULAR PRESSURE. PROBLEM RESOLVED. CAUSE OF EVENT WAS REPOR…	Lens Exchange	Resolved
https://www.accessdata.fda.gov/scripts/cdrh/cfdocs/cfMAUDE/Detail.CFM?MDRFOI__ID=15506720&pc=QCB	2023826-2022-03359	2022-08-05 04:00:00	Injury	STAAR SURGICAL COMPANY	2022-09-29 04:00:00	QCB	IMPLANTABLE COLLAMER LENS (ICL)	Adverse Event Without Identified Device or Use Problem	Intraocular Pressure Increased; Appropriate Clinical Signs, Symptoms, Conditions Term / Code Not Available	P030016	NA	1	Event Description: THE REPORTER INDICATED THAT A 13.2MM VTICM513.2 IMPLANTABLE COLLAMER LENS OF -4.0/1.0/112 (SPHERE/CYLINDER/AXIS) WAS IMPLANTED INTO THE PATIENT'S LEFT EYE (OS) ON (B)(6) 2022. ON (B)(6) 2022, THE LENS WAS EXCHANGED FOR A SHORTER LENGTH LENS DUE TO: SIGNIFICANT REDUCTION OF IRIDOCORNEAL ANGLES, PUPIL BLOCK WITH ELEVATED IOP, ANGLE CLOSURE WITH ELEVATED IOP, PIGMENT DISPERSION, A…	Lens Exchange	Resolved
https://www.accessdata.fda.gov/scripts/cdrh/cfdocs/cfMAUDE/Detail.CFM?MDRFOI__ID=15630190&pc=QCB	2023826-2022-03698	2021-12-18 05:00:00	Injury	STAAR SURGICAL COMPANY	2022-10-19 04:00:00	QCB	IMPLANTABLE COLLAMER LENS (ICL)	Inadequacy of Device Shape and/or Size	Intraocular Pressure Increased; Appropriate Clinical Signs, Symptoms, Conditions Term / Code Not Available	P030016	NA	1	Event Description: THE REPORTER INDICATED THAT A 12.6MM VTICMO12.6 IMPLANTABLE COLLAMER LENS OF -10.00/4.50/095 (SPHERE/CYLINDER/AXIS) WAS IMPLANTED INTO THE PATIENT'S RIGHT EYE (OD) ON (B)(6)2021. PATIENT EXPERIENCED ANGLE CLOSURE WITH ELEVATED INTRAOCULAR PRESSURE. IN THE REPORTER'S OPINION THE CAUSE OF THE EVENT WAS THE DEVICE, THE REPORTER STATED " THE TICL WAS LARGE IN SIZE". FOR ADDITIONAL …	Unknown	Unknown
https://www.accessdata.fda.gov/scripts/cdrh/cfdocs/cfMAUDE/Detail.CFM?MDRFOI__ID=15659600&pc=QCB	2023826-2022-03713	2022-09-10 04:00:00	Injury	STAAR SURGICAL COMPANY	2022-10-24 04:00:00	QCB	IMPLANTABLE COLLAMER LENS (ICL)	Off-Label Use; Inadequacy of Device Shape and/or Size	Intraocular Pressure Increased; Appropriate Clinical Signs, Symptoms, Conditions Term / Code Not Available	P030016	NA	1	Event Description: THE REPORTER INDICATED THAT THE SURGEON IMPLANTED A 12.1MM VTICMO12.1 IMPLANTABLE COLLAMER LENS OF DIOPTER -16.5/+2.5/091 INTO THE PATIENT'S LEFT EYE (OS) ON (B)(6) 2022. THE LENS WAS EXCHANGED ON (B)(6) 2022 FOR A LENS OF THE SAME LENGTH DUE TO EXCESSIVE VAULT AND SIGNIFICANT REDUCTION OF IRIDO-CORNEAL ANGLES. ELEVATED IOP WITHOUT PUPIL BLOCK/ANGLE CLOSURE WAS ALSO REPORTED. T…	Lens Exchange	Resolved
https://www.accessdata.fda.gov/scripts/cdrh/cfdocs/cfMAUDE/Detail.CFM?MDRFOI__ID=15764262&pc=QCB	2023826-2022-04078	NA	Injury	STAAR SURGICAL COMPANY	2022-11-09 05:00:00	QCB	IMPLANTABLE COLLAMER LENS (ICL)	Inadequacy of Device Shape and/or Size	Intraocular Pressure Increased; Appropriate Clinical Signs, Symptoms, Conditions Term / Code Not Available	P030016	NA	1	Event Description: THE REPORTER INDICATED THAT THE SURGEON IMPLANTED A 13.2MM VTICM5_13.2; -11.50/2.5/089 (SPHERE/CYLINDER/AXIS) IMPLANTABLE COLLAMER LENS INTO THE PATIENT'S LEFT EYE (OS) ON (B)(6)2022. THE SURGEON REPORTS EXCESSIVE VAULTING; ELEVATED INTRAOCULAR PRESSURE WITHOUT PUPIL BLOCK AND ANGLE CLOSURE; PIGMENT DISPERSION; UNREACTIVE FIXED PUPIL; AND ADDITIONALLY NOTED "QUIET EYE; UNREACTI…	Lens Extraction	Resolved
https://www.accessdata.fda.gov/scripts/cdrh/cfdocs/cfMAUDE/Detail.CFM?MDRFOI__ID=15910184&pc=QCB	2023826-2022-04341	NA	Injury	STAAR SURGICAL COMPANY	2022-12-02 05:00:00	QCB	IMPLANTABLE COLLAMER LENS (ICL)	Misfocusing; Inadequacy of Device Shape and/or Size	Intraocular Pressure Increased; Appropriate Clinical Signs, Symptoms, Conditions Term / Code Not Available	P030016	NA	1	Event Description: THE REPORTER INDICATED THE SURGEON IMPLANTED A 13.2MM VTICMO13.2 IMPLANTABLE COLLAMER LENS, -06.50/+5.5/108 (SPHERE/CYLINDER/AXIS), IN THE PATIENTS RIGHT EYE (OD), ON (B)(6) 2022. THE LENS WAS REPORTED AS EXCESSIVE VAULTING, ELEVATED INTRAOCULAR PRESSURE (IOP) AND SIGNIFICANT REDUCTION OF IRIDO-CORNEAL ANGLES. THE PATIENT EXPERIENCED A REFRACTIVE SURPRISE AND THE EYE WAS BURNIN…	Lens Exchange	Resolved
https://www.accessdata.fda.gov/scripts/cdrh/cfdocs/cfMAUDE/Detail.CFM?MDRFOI__ID=15993011&pc=QCB	2023826-2022-04420	2022-11-11 05:00:00	Injury	STAAR SURGICAL COMPANY	2022-12-15 05:00:00	QCB	IMPLANTABLE COLLAMER LENS (ICL)	Inadequacy of Device Shape and/or Size	Intraocular Pressure Increased; Appropriate Clinical Signs, Symptoms, Conditions Term / Code Not Available	P030016	NA	1	Event Description: THE REPORTER INDICATED THAT A 12.6MM VTICM5 12.1 IMPLANTABLE COLLAMER LENS OF -4.00/2.5/001 (SPHERE/CYLINDER/AXIS) WAS IMPLANTED INTO THE PATIENT'S LEFT EYE (OS) ON (B)(6) 2022. ON (B)(6) 2022 THE LENS WAS EXPLANTED DUE TO EXCESSIVE VAULT AND ANGLE CLOSURE WITH ELEVATED IOP. "PATIENT DID NOT WANT TO UNDERGO ANOTHER LENS IMPLANTATION." CAUSE REPORTED AS UNKNOWN. Manufacturer Nar…	Lens Extraction	Unknown
https://www.accessdata.fda.gov/scripts/cdrh/cfdocs/cfMAUDE/Detail.CFM?MDRFOI__ID=15993013&pc=QCB	2023826-2022-04419	2022-11-11 05:00:00	Injury	STAAR SURGICAL COMPANY	2022-12-15 05:00:00	QCB	IMPLANTABLE COLLAMER LENS (ICL)	Inadequacy of Device Shape and/or Size	Intraocular Pressure Increased; Appropriate Clinical Signs, Symptoms, Conditions Term / Code Not Available	P030016	NA	1	Event Description: THE REPORTER INDICATED THAT A 12.6MM VTICM5 12.6 IMPLANTABLE COLLAMER LENS OF -3.00/1.5/004 (SPHERE/CYLINDER/AXIS) WAS IMPLANTED INTO THE PATIENT'S RIGHT EYE (OD) ON (B)(6) 2022. ON (B)(6) 2022 THE LENS WAS EXPLANTED DUE TO EXCESSIVE VAULT AND ANGLE CLOSURE WITH ELEVATED IOP. "PATIENT DID NOT WANT TO UNDERGO ANOTHER LENS IMPLANTATION." CAUSE REPORTED AS UNKNOWN. Manufacturer Na…	Lens Extraction	Unknown
https://www.accessdata.fda.gov/scripts/cdrh/cfdocs/cfMAUDE/Detail.CFM?MDRFOI__ID=16000862&pc=QCB	2023826-2022-04423	NA	Malfunction	STAAR SURGICAL COMPANY	2022-12-16 05:00:00	QCB	IMPLANTABLE COLLAMER LENS (ICL)	No Apparent Adverse Event	Intraocular Pressure Increased; Appropriate Clinical Signs, Symptoms, Conditions Term / Code Not Available	NA	NA	1	Event Description: THE REPORTER INDICATED THAT AN IMPLANTABLE COLLAMER LENS OF UNKNOWN MODEL AND SIZE WAS IMPLANTED INTO THE PATIENT'S RIGHT EYE (OD) ON AN UNKNOWN DATE. ELEVATED IOP AND NARROW ANGLES WERE REPORTED. THE LENS REMAINS IMPLANTED AND THE PATIENT DOES NOT WANT THE LENS TO BE REMOVED. NO FURTHER INFORMATION HAS BEEN PROVIDED. IF ADDITIONAL INFORMATION IS RECEIVED A SUPPLEMENTAL MEDWATC…	Lens Retention	Unknown
https://www.accessdata.fda.gov/scripts/cdrh/cfdocs/cfMAUDE/Detail.CFM?MDRFOI__ID=16000874&pc=QCB	2023826-2022-04424	NA	Injury	STAAR SURGICAL COMPANY	2022-12-16 05:00:00	QCB	IMPLANTABLE COLLAMER LENS (ICL)	No Apparent Adverse Event	Intraocular Pressure Increased; Appropriate Clinical Signs, Symptoms, Conditions Term / Code Not Available	NA	NA	1	Event Description: THE REPORTER INDICATED THAT AN IMPLANTABLE COLLAMER LENS OF UNKNOWN MODEL AND SIZE WAS IMPLANTED INTO THE PATIENT'S LEFT EYE (OS) ON AN UNKNOWN DATE. ELEVATED IOP AND NARROW ANGLES WERE REPORTED. THE LENS REMAINS IMPLANTED AND THE PATIENT DOES NOT WANT THE LENS TO BE REMOVED. NO FURTHER INFORMATION HAS BEEN PROVIDED. IF ADDITIONAL INFORMATION IS RECEIVED A SUPPLEMENTAL MEDWATCH…	Lens Exchange	Resolved
https://www.accessdata.fda.gov/scripts/cdrh/cfdocs/cfMAUDE/Detail.CFM?MDRFOI__ID=16309076&pc=QCB	2023826-2023-00446	2023-01-20 05:00:00	Injury	STAAR SURGICAL COMPANY	2023-02-06 05:00:00	QCB	IMPLANTABLE COLLAMER LENS (ICL)	Adverse Event Without Identified Device or Use Problem	Intraocular Pressure Increased; Appropriate Clinical Signs, Symptoms, Conditions Term / Code Not Available	P030016	NA	1	Event Description: THE REPORTER INDICATED THAT THE SURGEON IMPLANTED A 13.2MM VTICM5_13.2; -7.5/2.0/050 (SPHERE/CYLINDER/AXIS) IMPLANTABLE COLLAMER LENS INTO THE PATIENT'S LEFT EYE (OS) ON (B)(6)2022. THE SURGEON REPORTS PIGMENT DISPERSION AND ELEVATED INTRAOCULAR PRESSURE AND MEDICATION IS BEING USED TO LOWER IOP. LENS REMAINS IMPLANTED. CAUSE OF THE EVENT WAS REPORTED AS UNKNOWN AND THE DEVICE …	Lens Exchange	Unknown
https://www.accessdata.fda.gov/scripts/cdrh/cfdocs/cfMAUDE/Detail.CFM?MDRFOI__ID=16343041&pc=QCB	2023826-2023-00480	2022-11-26 05:00:00	Injury	STAAR SURGICAL COMPANY	2023-02-09 05:00:00	QCB	IMPLANTABLE COLLAMER LENS (ICL)	Off-Label Use; Inadequacy of Device Shape and/or Size; Adverse Event Without Identified Device or Use Problem	Intraocular Pressure Increased; Appropriate Clinical Signs, Symptoms, Conditions Term / Code Not Available	P030016	NA	1	Event Description: THE REPORTER INDICATED THAT THE SURGEON IMPLANTED A 13.2MM VTICM5_13.2; -10.50/+1.5/27 (SPHERE/CYLINDER/AXIS) IMPLANTABLE COLLAMER LENS INTO THE PATIENT'S LEFT EYE (OS) ON (B)(6) 2022. THE PATIENT EXPERIENCED EXCESSIVE VAULTING; ELEVATED INTRAOCULAR PRESSURE; SIGNIFICANT REDUCTION OF IRIDO-CORNEAL ANGLES AND LENS REPOSITIONING WAS PERFORMED BUT THIS DID NOT RESOLVE THE PROBLEM.…	Lens Exchange	Resolved
https://www.accessdata.fda.gov/scripts/cdrh/cfdocs/cfMAUDE/Detail.CFM?MDRFOI__ID=16439865&pc=QCB	2023826-2023-00603	2022-12-03 05:00:00	Injury	STAAR SURGICAL COMPANY	2023-02-24 05:00:00	QCB	IMPLANTABLE COLLAMER LENS (ICL)	Inadequacy of Device Shape and/or Size	Intraocular Pressure Increased; Appropriate Clinical Signs, Symptoms, Conditions Term / Code Not Available	P030016	NA	1	Event Description: THE REPORTER INDICATED THAT A 12.6MM VTICM5 12.6 IMPLANTABLE COLLAMER LENS OF -8.0/2.50/005 (SPHERE/CYLINDER/AXIS) WAS IMPLANTED INTO THE PATIENT'S RIGHT EYE (OD) ON (B)(6) 2022. ON (B)(6) 2023 THE LENS WAS REMOVED AND ON THE SAME DAY DIFFERENT SURGERY A REPLACEMENT LENS OF SHORTER LENGTH WAS IMPLANTED DUE TO EXCESSIVE VAULT; ELEVATED IOP AND UNREACTIVE FIXED PUPIL. THE REPLACE…	Lens Exchange	Resolved
https://www.accessdata.fda.gov/scripts/cdrh/cfdocs/cfMAUDE/Detail.CFM?MDRFOI__ID=16773438&pc=QCB	2023826-2023-01462	2023-04-05 04:00:00	Injury	STAAR SURGICAL COMPANY	2023-04-19 04:00:00	QCB	IMPLANTABLE COLLAMER LENS (ICL)	Adverse Event Without Identified Device or Use Problem	Intraocular Pressure Increased; Appropriate Clinical Signs, Symptoms, Conditions Term / Code Not Available	P030016	NA	1	Event Description: THE REPORTER INDICATED THAT THE SURGEON IMPLANTED A 13.7MM VTICM5_13.7; -8.5/1.0/067 (SPHERE/CYLINDER/AXIS) IMPLANTABLE COLLAMER LENS INTO THE PATIENT'S RIGHT EYE (OD) ON (B)(6)2023. THE SURGEON REPORTS ELEVATED INTRAOCULAR PRESSURE AND PIGMENT DISPERSION. ON (B)(6) 2023 THE LENS WAS EXPLANTED. IT WAS ADDITIONALLY NOTED "REMOVED THE LENS AS THE IOP WENT UP WITH LOT OF PIGMENT D…	Lens Extraction	Resolved
https://www.accessdata.fda.gov/scripts/cdrh/cfdocs/cfMAUDE/Detail.CFM?MDRFOI__ID=16773439&pc=QCB	2023826-2023-01463	2023-04-05 04:00:00	Injury	STAAR SURGICAL COMPANY	2023-04-19 04:00:00	QCB	IMPLANTABLE COLLAMER LENS (ICL)	Adverse Event Without Identified Device or Use Problem	Intraocular Pressure Increased; Appropriate Clinical Signs, Symptoms, Conditions Term / Code Not Available	P030016	NA	1	Event Description: THE REPORTER INDICATED THAT THE SURGEON IMPLANTED A 13.7MM VTICM5_13.7; -9.0/1.0/090 (SPHERE/CYLINDER/AXIS) IMPLANTABLE COLLAMER LENS INTO THE PATIENT'S LEFT EYE (OS) ON (B)(6) 2023. THE SURGEON REPORTS ELEVATED INTRAOCULAR PRESSURE AND PIGMENT DISPERSION. ON (B)(6) 2023 THE LENS WAS EXPLANTED. IT WAS ADDITIONALLY NOTED "REMOVED THE LENS AS THE IOP WENT UP WITH LOT OF PIGMENT D…	Lens Extraction	Resolved
https://www.accessdata.fda.gov/scripts/cdrh/cfdocs/cfMAUDE/Detail.CFM?MDRFOI__ID=16791590&pc=QCB	2023826-2023-01471	2023-01-17 05:00:00	Injury	STAAR SURGICAL COMPANY	2023-04-21 04:00:00	QCB	IMPLANTABLE COLLAMER LENS (ICL)	Inadequacy of Device Shape and/or Size	Intraocular Pressure Increased; Appropriate Clinical Signs, Symptoms, Conditions Term / Code Not Available	P030016	NA	1	Event Description: THE REPORTER INDICATED THAT THE SURGEON IMPLANTED A 13.2MM VTICMO13.2 IMPLANTABLE COLLAMER LENS OF DIOPTER -14.50/+2.5/092 INTO THE PATIENT'S RIGHT EYE (OD) ON (B)(6) 2023. THE LENS WAS EXPLANTED ON (B)(6) 2023 DUE TO EXCESSIVE VAULT AND ANGLE CLOSURE WITH ELEVATED IOP; 30MMHG. ON (B)(6) 2023 A REPLACEMENT LENS TWO SIZES SHORTER IN LENGTH WAS IMPLANTED AND THE PROBLEM WAS RESOL…	Lens Exchange	Resolved
https://www.accessdata.fda.gov/scripts/cdrh/cfdocs/cfMAUDE/Detail.CFM?MDRFOI__ID=16873134&pc=QCB	2023826-2023-01681	2023-05-02 04:00:00	Injury	STAAR SURGICAL COMPANY	2023-05-04 04:00:00	QCB	IMPLANTABLE COLLAMER LENS (ICL)	Adverse Event Without Identified Device or Use Problem	Intraocular Pressure Increased; Appropriate Clinical Signs, Symptoms, Conditions Term / Code Not Available	P030016	NA	1	Event Description: THE REPORTER INDICATED THAT THE SURGEON IMPLANTED A 12.6MM VTICM5_12.6; -13.50/2.5/002 (SPHERE/CYLINDER/AXIS) IMPLANTABLE COLLAMER LENS INTO THE PATIENT'S LEFT EYE (OS) ON (B)(6) 2022. THE SURGEON REPORTS THERE IS ICL DEPOSITS ON THE LENS, BUT NO REFRACTIVE OUTCOMES OR LOSS OF VISION ACUITY OR VISION QUALITY. BUT LENS TRANSPARENCY SEEMS TO BE AFFECTED; THERE IS A RISE IN IOP AN…	Lens Extraction	Resolved
https://www.accessdata.fda.gov/scripts/cdrh/cfdocs/cfMAUDE/Detail.CFM?MDRFOI__ID=16962964&pc=QCB	2023826-2023-01910	2023-03-18 04:00:00	Injury	STAAR SURGICAL COMPANY	2023-05-19 04:00:00	QCB	IMPLANTABLE COLLAMER LENS (ICL)	Inadequacy of Device Shape and/or Size	Intraocular Pressure Increased; Appropriate Clinical Signs, Symptoms, Conditions Term / Code Not Available	P030016	NA	1	Event Description: THE REPORTER INDICATED THAT THE SURGEON IMPLANTED A 13.2MM VTICMO13.2 IMPLANTABLE COLLAMER LENS OF DIOPTER -7.0/+0.5/003 INTO THE PATIENT'S LEFT EYE (OS) ON (B)(6) 2022. THE LENS WAS EXCHANGED ON (B)(6) 2023 FOR A SHORTER LENGTH LENS DUE TO EXCESSIVE VAULT AND SIGNIFICANT REDUCTION OF IRIDO-CORNEAL ANGLES. THIS RESOLVED THE PROBLEM. THE REPORTER DID NOT GIVE A CAUSE FOR THIS EV…	Lens Exchange	Resolved
https://www.accessdata.fda.gov/scripts/cdrh/cfdocs/cfMAUDE/Detail.CFM?MDRFOI__ID=16976342&pc=QCB	2023826-2023-01871	2023-01-30 05:00:00	Injury	STAAR SURGICAL COMPANY	2023-05-22 04:00:00	QCB	IMPLANTABLE COLLAMER LENS (ICL)	Off-Label Use; Inadequacy of Device Shape and/or Size	Intraocular Pressure Increased; Appropriate Clinical Signs, Symptoms, Conditions Term / Code Not Available	P030016	NA	1	Event Description: THE REPORTER INDICATED THE SURGEON IMPLANTED A 13.2MM VTICMO13.2 IMPLANTABLE COLLAMER LENS, -13.50/+1.5/095 (SPHERE/CYLINDER/AXIS), IN THE PATIENTS RIGHT EYE (OD), ON (B)(6) 2022. THE LENS WAS EXPLANTED ON (B)(6) 2023 DUE TO EXCESSIVE VAULTING AND ELEVATED INTRAOCULAR PRESSURE (IOP). THE PATIENT COMPLAINED OF DOUBLE VISION. THE PROBLEM WAS RESOLVED. THE CAUSE OF THE EVENT WAS U…	Lens Extraction	Resolved
https://www.accessdata.fda.gov/scripts/cdrh/cfdocs/cfMAUDE/Detail.CFM?MDRFOI__ID=16988828&pc=QCB	2023826-2023-01872	2023-02-08 05:00:00	Injury	STAAR SURGICAL COMPANY	2023-05-23 04:00:00	QCB	IMPLANTABLE COLLAMER LENS (ICL)	Off-Label Use; Inadequacy of Device Shape and/or Size	Intraocular Pressure Increased; Appropriate Clinical Signs, Symptoms, Conditions Term / Code Not Available	P030016	NA	1	Event Description: THE REPORTER INDICATED THE SURGEON IMPLANTED A 13.2MM VTICMO13.2 IMPLANTABLE COLLAMER LENS, -12.50/+1.0/071 (SPHERE/CYLINDER/AXIS), IN THE PATIENTS LEFT EYE (OS), ON (B)(6)2022. THE LENS WAS EXPLANTED ON (B)(6)2023 DUE TO EXCESSIVE VAULTING AND ELEVATED INTRAOCULAR PRESSURE (IOP). THE PATIENT COMPLAINED OF DOUBLE VISION. THE PROBLEM WAS RESOLVED. THE CAUSE OF THE EVENT WAS UNKN…	Lens Extraction	Resolved
https://www.accessdata.fda.gov/scripts/cdrh/cfdocs/cfMAUDE/Detail.CFM?MDRFOI__ID=17014968&pc=QCB	2023826-2023-02065	NA	Injury	STAAR SURGICAL COMPANY	2023-05-26 04:00:00	QCB	IMPLANTABLE COLLAMER LENS (ICL)	Inadequacy of Device Shape and/or Size	Intraocular Pressure Increased; Appropriate Clinical Signs, Symptoms, Conditions Term / Code Not Available	P030016	NA	1	Event Description: THE REPORTER INDICATED THAT THE SURGEON IMPLANTED A 13.7MM VTICM5_13.7; -11.0/+3.0/072 (SPHERE/CYLINDER/AXIS) IMPLANTABLE COLLAMER LENS INTO THE PATIENT'S RIGHT EYE (OD) ON (B)(6) 2023. THE SURGEON EXPERIENCED EXCESSIVE VAULTING, SIGNIFICANT REDUCTION OF IRIDO-CORNEAL ANGLES, ANGLE CLOSURE WITH ELEVATED INTRAOCULAR PRESSURE. LENS REMAINS IMPLANTED. THE CAUSE OF THE EVENT WAS RE…	Lens Exchange	Resolved
https://www.accessdata.fda.gov/scripts/cdrh/cfdocs/cfMAUDE/Detail.CFM?MDRFOI__ID=17014969&pc=QCB	2023826-2023-02066	NA	Injury	STAAR SURGICAL COMPANY	2023-05-26 04:00:00	QCB	IMPLANTABLE COLLAMER LENS (ICL)	Inadequacy of Device Shape and/or Size	Intraocular Pressure Increased; Appropriate Clinical Signs, Symptoms, Conditions Term / Code Not Available	P030016	NA	1	Event Description: THE REPORTER INDICATED THAT THE SURGEON IMPLANTED A 13.7MM VTICM5_13.7; -11.5/+2.5/101 (SPHERE/CYLINDER/AXIS) IMPLANTABLE COLLAMER LENS INTO THE PATIENT'S LEFT EYE (OS) ON (B)(6) 2023. THE SURGEON EXPERIENCED EXCESSIVE VAULTING, SIGNIFICANT REDUCTION OF IRIDO-CORNEAL ANGLES, ANGLE CLOSURE WITH ELEVATED INTRAOCULAR PRESSURE. LENS REMAINS IMPLANTED. THE CAUSE OF THE EVENT WAS REP…	Lens Exchange	Resolved
https://www.accessdata.fda.gov/scripts/cdrh/cfdocs/cfMAUDE/Detail.CFM?MDRFOI__ID=17091758&pc=QCB	2023826-2023-02289	2023-04-11 04:00:00	Injury	STAAR SURGICAL COMPANY	2023-06-08 04:00:00	QCB	IMPLANTABLE COLLAMER LENS (ICL)	Inadequacy of Device Shape and/or Size	Intraocular Pressure Increased; Appropriate Clinical Signs, Symptoms, Conditions Term / Code Not Available	P030016	NA	1	Event Description: THE REPORTER INDICATED THAT THE SURGEON IMPLANTED A 13.2MM VTICMO13.2 IMPLANTABLE COLLAMER LENS OF DIOPTER -6.0/+0.5/094 INTO THE PATIENT'S RIGHT EYE (OD) ON (B)(6) 2023. IN A SEPARATE SURGERY THAT DAY THE LENS WAS EXCHANGED FOR A SHORTER LENGTH LENS DUE TO EXCESSIVE VAULT. ANGLE CLOSURE WITH ELEVATED IOP AND SIGNIFICANT REDUCTION OF IRIDO-CORNEAL ANGLES WERE ALSO NOTED. THE EX…	Lens Exchange	Resolved
https://www.accessdata.fda.gov/scripts/cdrh/cfdocs/cfMAUDE/Detail.CFM?MDRFOI__ID=17342540&pc=QCB	2023826-2023-02889	2023-06-01 04:00:00	Injury	STAAR SURGICAL COMPANY	2023-07-18 04:00:00	QCB	IMPLANTABLE COLLAMER LENS (ICL)	Inadequacy of Device Shape and/or Size	Intraocular Pressure Increased; Appropriate Clinical Signs, Symptoms, Conditions Term / Code Not Available	P030016	NA	1	Event Description: THE REPORTER INDICATED THE SURGEON IMPLANTED A 12.6MM VTICM5_12.6 IMPLANTABLE COLLAMER LENS, -09.50/+1.0/091 (SPHERE/CYLINDER/AXIS), INTO THE PATIENTS RIGHT EYE (OD) ON (B)(6) 2023. THE LENS WAS REMOVED ON (B)(6) 2023 DUE TO EXCESSIVE VAULTING AND ANGLE CLOSURE WITH ELEVATED INTRAOCULAR PRESSURE (IOP) . THE LENS WAS REPLACED WITH A SHORTER LENS AND THE PROBLEM WAS RESOLVED. POS…	Lens Exchange	Resolved
https://www.accessdata.fda.gov/scripts/cdrh/cfdocs/cfMAUDE/Detail.CFM?MDRFOI__ID=17492163&pc=QCB	2023826-2023-03432	2023-03-27 04:00:00	Injury	STAAR SURGICAL COMPANY	2023-08-09 04:00:00	QCB	IMPLANTABLE COLLAMER LENS (ICL)	Adverse Event Without Identified Device or Use Problem; No Apparent Adverse Event	Intraocular Pressure Increased; Appropriate Clinical Signs, Symptoms, Conditions Term / Code Not Available	P030016	NA	1	Event Description: THE REPORTER INDICATED THAT A 13.7MM, VTICM5_13.7, -8.50/2.5/106 (SPHERE/CYLINDER/AXIS), IMPLANTABLE COLLAMER LENS WAS IMPLANTED INTO THE PATIENT'S EYE. OCULAR HYPER TENSION WAS OBSERVED. LENS REMAINS IMPLANTED. ADDITIONAL INFORMATION HAS BEEN REQUESTED BUT NONE HAS BEEN FORTHCOMING.Event Description: THE REPORTER INDICATED THAT A 13.7MM, VTICM5_13.7, -8.5/2.5/106 (SPHERE/CYLIN…	Lens Exchange	Resolved
https://www.accessdata.fda.gov/scripts/cdrh/cfdocs/cfMAUDE/Detail.CFM?MDRFOI__ID=17502541&pc=QCB	2023826-2023-03460	NA	Injury	STAAR SURGICAL COMPANY	2023-08-10 04:00:00	QCB	IMPLANTABLE COLLAMER LENS (ICL)	Inadequacy of Device Shape and/or Size	Intraocular Pressure Increased; Appropriate Clinical Signs, Symptoms, Conditions Term / Code Not Available	P030016	NA	1	Event Description: THE REPORTER INDICATED THAT THE SURGEON IMPLANTED A 13.2MM VTICM5_13.2; -6.50/+1.0/75 (SPHERE/CYLINDER/AXIS) IMPLANTABLE COLLAMER LENS INTO THE PATIENT'S RIGHT EYE (OD) ON (B)(6) 2023. THE PATIENT EXPERIENCED EXCESSIVE VAULTING, ELEVATED INTRAOCULAR PRESSURE WITHOUT PUPIL BLOCK, SIGNIFICANT REDUCTION OF IDIRO-CORNEAL ANGLES, ADDITIONALLY MEDICAL INTERVENTION OF COMBIGAN AND COS…	Lens Exchange	Resolved
https://www.accessdata.fda.gov/scripts/cdrh/cfdocs/cfMAUDE/Detail.CFM?MDRFOI__ID=17502604&pc=QCB	2023826-2023-03461	NA	Injury	STAAR SURGICAL COMPANY	2023-08-10 04:00:00	QCB	IMPLANTABLE COLLAMER LENS (ICL)	Inadequacy of Device Shape and/or Size	Intraocular Pressure Increased; Appropriate Clinical Signs, Symptoms, Conditions Term / Code Not Available	P030016	NA	1	Event Description: THE REPORTER INDICATED THAT THE SURGEON IMPLANTED A 13.2MM VTICM5_13.2; -7.00/+0.5/93 (SPHERE/CYLINDER/AXIS) IMPLANTABLE COLLAMER LENS INTO THE PATIENT'S LEFT EYE (OS) ON (B)(6) 2023. THE PATIENT EXPERIENCED EXCESSIVE VAULTING, ELEVATED INTRAOCULAR PRESSURE WITHOUT PUPIL BLOCK, SIGNIFICANT REDUCTION OF IDIRO-CORNEAL ANGLES, ADDITIONALLY MEDICAL INTERVENTION OF COMBIGAN AND COSO…	Lens Exchange	Resolved
https://www.accessdata.fda.gov/scripts/cdrh/cfdocs/cfMAUDE/Detail.CFM?MDRFOI__ID=17669068&pc=QCB	2023826-2023-03734	2023-03-27 04:00:00	Injury	STAAR SURGICAL COMPANY	2023-09-01 04:00:00	QCB	IMPLANTABLE COLLAMER LENS (ICL)	Adverse Event Without Identified Device or Use Problem	Intraocular Pressure Increased; Appropriate Clinical Signs, Symptoms, Conditions Term / Code Not Available	P030016	NA	1	Event Description: THE REPORTER INDICATED THAT A 13.7MM, VTICM5_13.7, -8.0/3.0/070 (SPHERE/CYLINDER/AXIS), IMPLANTABLE COLLAMER LENS WAS IMPLANTED INTO THE PATIENT'S LEFT EYE (OS) ON (B)(6) 2023. SIGNIFICANT REDUCTION OF IRIDO-CORNEAL ANGLES AND ELEVATED IOP 21MMHG WITHOUT PUPIL BLOCK AND ANGLE CLOSURE(ASSESSED ON (B)(6) 2023). WERE OBSERVED, THE LENS WAS REMOVED AND EXCHANGED ON (B)(6) 2023 AND …	Lens Exchange	Resolved
https://www.accessdata.fda.gov/scripts/cdrh/cfdocs/cfMAUDE/Detail.CFM?MDRFOI__ID=17913515&pc=QCB	2023826-2023-04272	2023-05-25 04:00:00	Injury	STAAR SURGICAL COMPANY	2023-10-11 04:00:00	QCB	IMPLANTABLE COLLAMER LENS (ICL)	Adverse Event Without Identified Device or Use Problem	Intraocular Pressure Increased; Appropriate Clinical Signs, Symptoms, Conditions Term / Code Not Available	P030016	NA	1	Event Description: THE REPORTER INDICATED THAT A 13.2MM VTICMO 13.2 IMPLANTABLE COLLAMER LENS OF -7.50/1.0/085 (SPHERE/CYLINDER/AXIS) WAS IMPLANTED INTO THE PATIENT'S RIGHT EYE (OD) ON (B)(6) 2019. ON (B)(6) 2023 THE LENS WAS EXCHANGED FOR A SPHERICAL MODEL DUE TO ELEVATED IOP AND SIGNIFICANT REDUCTION OF IRIDO-CORNEAL ANGLES. THE REPLACEMENT LENS RESOLVED THE PROBLEM. Manufacturer Narrative: H6-…	Lens Exchange	Resolved
https://www.accessdata.fda.gov/scripts/cdrh/cfdocs/cfMAUDE/Detail.CFM?MDRFOI__ID=17916405&pc=QCB	2023826-2023-04520	2023-06-27 04:00:00	Injury	STAAR SURGICAL COMPANY	2023-10-11 04:00:00	QCB	IMPLANTABLE COLLAMER LENS (ICL)	Inadequacy of Device Shape and/or Size; Adverse Event Without Identified Device or Use Problem	Intraocular Pressure Increased; Appropriate Clinical Signs, Symptoms, Conditions Term / Code Not Available	P030016	NA	1	Event Description: THE REPORTER INDICATED THAT THE SURGEON IMPLANTED A 12.6MM VTICMO12.6, -15.0/+1.5/072 (SPHERE/CYLINDER/AXIS) IMPLANTABLE COLLAMER LENS INTO THE PATIENT'S LEFT EYE (OS) ON (B)(6) 2023. THE PATIENT EXPERIENCED ANGLE CLOSURE WITH ELEVATED INTRAOCULAR PRESSURE AND ON (B)(6) 2023 AN ADDITION OF NEW PI (YAG) WAS PERFORMED. LENS REMAINS IMPLANTED. A FOLLOW UP WILL BE PERFORMED WAS NOT…	Lens Exchange + Secondary Operation	Not_Resolved
https://www.accessdata.fda.gov/scripts/cdrh/cfdocs/cfMAUDE/Detail.CFM?MDRFOI__ID=17916406&pc=QCB	2023826-2023-04521	2023-06-27 04:00:00	Injury	STAAR SURGICAL COMPANY	2023-10-11 04:00:00	QCB	IMPLANTABLE COLLAMER LENS (ICL)	Adverse Event Without Identified Device or Use Problem	Intraocular Pressure Increased; Appropriate Clinical Signs, Symptoms, Conditions Term / Code Not Available	P030016	NA	1	Event Description: THE REPORTER INDICATED THAT THE SURGEON IMPLANTED A 12.6MM VTICMO12.6, -15.50/+2.5/121 (SPHERE/CYLINDER/AXIS) IMPLANTABLE COLLAMER LENS INTO THE PATIENT'S RIGHT EYE (OD) ON (B)(6)2023. THE PATIENT EXPERIENCED ANGLE CLOSURE WITH ELEVATED INTRAOCULAR PRESSURE AND ON (B)(6) 2023 AN ADDITION OF NEW PI (YAG) WAS PERFORMED. ON (B)(6) 2023 THE LENS WAS EXCHANGED WITH A SHORTER LENGTH …	Lens Exchange + Secondary Operation	Not_Resolved
https://www.accessdata.fda.gov/scripts/cdrh/cfdocs/cfMAUDE/Detail.CFM?MDRFOI__ID=17948893&pc=QCB	2023826-2023-04442	2023-07-10 04:00:00	Injury	STAAR SURGICAL COMPANY	2023-10-17 04:00:00	QCB	IMPLANTABLE COLLAMER LENS (ICL)	Off-Label Use; Inadequacy of Device Shape and/or Size	Intraocular Pressure Increased; Appropriate Clinical Signs, Symptoms, Conditions Term / Code Not Available	N/A	NA	1	Event Description: THE REPORTER INDICATED THAT THE SURGEON IMPLANTED A 12.6MM VTICH12.6, -3.0/3.0/101 (SPHERE/CYLINDER/AXIS), IMPLANTABLE COLLAMER LENS INTO THE PATIENT'S LEFT EYE (OS) ON (B)(6)2022. THE LENS WAS EXPLANTED DUE TO ANGLE CLOSURE WITH ELEVATED IOP(30MMHG)(ASSESED ON (B)(6) 2023), AND EXCESSIVE VAULT ON (B)(6) 2023. THIS RESOLVED THE PROBLEM. CAUSE OF THE EVENT IS REPORTED AS USER ER…	Lens Extraction	Resolved
https://www.accessdata.fda.gov/scripts/cdrh/cfdocs/cfMAUDE/Detail.CFM?MDRFOI__ID=17970807&pc=QCB	2023826-2023-04632	NA	Injury	STAAR SURGICAL COMPANY	2023-10-19 04:00:00	QCB	IMPLANTABLE COLLAMER LENS (ICL)	Adverse Event Without Identified Device or Use Problem	Intraocular Pressure Increased; Appropriate Clinical Signs, Symptoms, Conditions Term / Code Not Available	P030016	NA	1	Event Description: THE REPORTER INDICATED THAT A 12.6MM VTICM5_12.6 IMPLANTABLE COLLAMER LENS OF -10.0/3.5/092 (SPHERE/CYLINDER/AXIS) WAS IMPLANTED INTO THE PATIENT'S LEFT EYE (OS) ON (B)(6) 2023 AS A REPLACEMENT LENS TO ADDRESS EXCESSIVE VAULT, ELEVATED IOP, ANGLE CLOSURE AND PIGMENT DISPERSION. FOR STATUS OF THE EYE (SIGNS/SYMPTOMS) IT WAS REPORTED THAT THE IOP (INTRAOCULAR PRESSURE) IS NORMAL …	Lens Retention	Unknown
https://www.accessdata.fda.gov/scripts/cdrh/cfdocs/cfMAUDE/Detail.CFM?MDRFOI__ID=17998693&pc=QCB	2023826-2023-04775	NA	Injury	STAAR SURGICAL COMPANY	2023-10-24 04:00:00	QCB	IMPLANTABLE COLLAMER LENS (ICL)	Adverse Event Without Identified Device or Use Problem	Intraocular Pressure Increased; Appropriate Clinical Signs, Symptoms, Conditions Term / Code Not Available	P030016	NA	1	Event Description: THE REPORTER INDICATED THAT THE SURGEON IMPLANTED A 12.1MM VTICMO12.1; -15.50/+2.5/129 (SPHERE/CYLINDER/AXIS) IMPLANTABLE COLLAMER LENS INTO THE PATIENT'S RIGHT EYE (OD) ON (B)(6) 2023 AS A REPLACEMENT LENS TO A PRIOR ANGLE CLOSURE WITH ELEVATED INTRAOCULAR PRESSURE. IT WAS REPORTED THAT THE PROBLEM WAS NOT RESOLVED. IT IS IMPLIED THE PREVIOUS PROBLEMS STILL PERSIST. LENS REMAI…	Lens Retention	Unknown
https://www.accessdata.fda.gov/scripts/cdrh/cfdocs/cfMAUDE/Detail.CFM?MDRFOI__ID=17999332&pc=QCB	2023826-2023-04699	2023-09-18 04:00:00	Injury	STAAR SURGICAL COMPANY	2023-10-24 04:00:00	QCB	IMPLANTABLE COLLAMER LENS (ICL)	Inadequacy of Device Shape and/or Size	Intraocular Pressure Increased; Appropriate Clinical Signs, Symptoms, Conditions Term / Code Not Available	P030016	NA	1	Event Description: THE REPORTER INDICATED THE SURGEON IMPLANTED A 12.6MM VTICM5_12.6 IMPLANTABLE COLLAMER LENS, -12.50/+2.0/066 (SPHERE/CYLINDER/AXIS), IN THE PATIENTS LEFT EYE (OS), ON (B)(6) 2023. THE LENS WAS REPORTED AS EXCESSIVE VAULTING, ANGLE CLOSURE WITH ELEVATED INTRAOCULAR PRESSURE AND SIGNIFICANT REDUCTION OF IRIDO-CORNEAL ANGLES. THERE WAS A SMALL TEAR IN THE ICL DURING LOADING. THE L…	Lens Exchange	Resolved
https://www.accessdata.fda.gov/scripts/cdrh/cfdocs/cfMAUDE/Detail.CFM?MDRFOI__ID=18048081&pc=QCB	2023826-2023-04728	2023-08-18 04:00:00	Injury	STAAR SURGICAL COMPANY	2023-11-01 04:00:00	QCB	IMPLANTABLE COLLAMER LENS (ICL)	Inadequacy of Device Shape and/or Size	Intraocular Pressure Increased; Appropriate Clinical Signs, Symptoms, Conditions Term / Code Not Available	P030016	NA	1	Event Description: THE REPORTER INDICATED THAT THE SURGEON IMPLANTED A 13.7MM VTICM5_13.7, -7.0/1.0/130 (SPHERE/CYLINDER/AXIS), IMPLANTABLE COLLAMER LENS INTO THE PATIENT'S RIGHT EYE (OD) ON (B)(6) 2023. THE LENS WAS EXPLANTED ON (B)(6) 2023 DUE TO ELEVATED IOP(69MMHG WITHOUT PUPIL BLOCK AND ANGLE CLOSURE, AND EXCESSIVE VAULT. THIS RESOLVED THE PROBLEM. CAUSE OF THE EVENT IS REPORTED AS OTHER: LE…	Lens Extraction	Resolved
https://www.accessdata.fda.gov/scripts/cdrh/cfdocs/cfMAUDE/Detail.CFM?MDRFOI__ID=18097675&pc=QCB	2023826-2023-05045	2023-10-03 04:00:00	Injury	STAAR SURGICAL COMPANY	2023-11-08 05:00:00	QCB	IMPLANTABLE COLLAMER LENS (ICL)	Adverse Event Without Identified Device or Use Problem	Intraocular Pressure Increased; Appropriate Clinical Signs, Symptoms, Conditions Term / Code Not Available	P030016	NA	1	Event Description: THE REPORTER INDICATED THAT THE SURGEON IMPLANTED A 12.1MM VTICMO12.1; -15.00/+1.5/073 (SPHERE/CYLINDER/AXIS) IMPLANTABLE COLLAMER LENS INTO THE PATIENT'S LEFT EYE (OS) ON (B)(6) 2023. THE PATIENT EXPERIENCED ANGLE CLOSURE WITH ELEVATED INTRAOCULAR PRESSURE, ON (B)(6) 2023 AN ADDITIONAL PI WAS PERFORMED. ON (B)(6) 2023 THE LENS WAS EXPLANTED AND IT WAS NOTED THE PATIENT HAD HIG…	Lens Extraction + Secondary Operation	Not_Resolved
https://www.accessdata.fda.gov/scripts/cdrh/cfdocs/cfMAUDE/Detail.CFM?MDRFOI__ID=18337478&pc=QCB	2023826-2023-05678	NA	Injury	STAAR SURGICAL COMPANY	2023-12-15 05:00:00	QCB	IMPLANTABLE COLLAMER LENS (ICL)	Adverse Event Without Identified Device or Use Problem	Intraocular Pressure Increased; Appropriate Clinical Signs, Symptoms, Conditions Term / Code Not Available	P030016	NA	1	Event Description: THE REPORTER INDICATED THE SURGEON IMPLANTED A 12.6MM VTICM5_12.6 IMPLANTABLE COLLAMER LENS, 10.00/+1.5/069 (SPHERE/CYLINDER/AXIS), INTO THE PATIENTS LEFT EYE (OS). AT ONE MONTH POST-OP, THE PATIENT HAD PERSISTENT ELEVATED INTRAOCULAR PRESSURE (IOP), WHICH WAS BEING TREATED WITH IOP LOWERING MEDICATIONS. THE PATIENT HAD NO SYMPTOMS OF ANGLE CLOSURE AND NO SIGNS OF INFLAMMATION.…	Lens Retention	Resolved
https://www.accessdata.fda.gov/scripts/cdrh/cfdocs/cfMAUDE/Detail.CFM?MDRFOI__ID=10537395&pc=QCB	2023826-2020-02066	2020-08-13 04:00:00	Injury	STAAR SURGICAL COMPANY	2020-09-15 04:00:00	QCB	IMPLANTABLE COLLAMER LENS (ICL)	Inadequacy of Device Shape and/or Size	Intraocular Pressure Increased; Appropriate Clinical Signs, Symptoms, Conditions Term / Code Not Available; No Clinical Signs, Symptoms or Conditions	P030016	NA	1	Event Description: THE REPORTER INDICATED THE SURGEON IMPLANTED A 13.7MM TMICL13.7 IMPLANTABLE COLLAMER LENS, -14.50/+2.5/100 (SPHERE/CYLINDER/AXIS), IN THE PATIENTS RIGHT EYE (OD) ON (B)(6) 2020. THE LENS WAS REPORTED AS BEING TOO LARGE AND WILL BE REMOVED. THE LENS REMAINS IMPLANTED. ADDITIONAL INFORMATION HAS BEEN REQUESTED BUT NONE HAS BEEN FORTHCOMING. IF ADDITIONAL INFORMATION IS RECEIVED, …	Lens Exchange	Resolved
https://www.accessdata.fda.gov/scripts/cdrh/cfdocs/cfMAUDE/Detail.CFM?MDRFOI__ID=11135926&pc=QCB	2023826-2021-00050	2020-09-25 04:00:00	Injury	STAAR SURGICAL COMPANY	2021-01-07 05:00:00	QCB	IMPLANTABLE COLLAMER LENS (ICL)	Inadequacy of Device Shape and/or Size	Intraocular Pressure Increased; Appropriate Clinical Signs, Symptoms, Conditions Term / Code Not Available; No Clinical Signs, Symptoms or Conditions	NA	NA	1	Event Description: THE REPORTER INDICATED THAT THE SURGEON IMPLANTED A 13.7MM VTICMO13.7 IMPLANTABLE COLLAMER LENS, -12.0/+1.5/080 (SPHERE/CYLINDER/AXIS), INTO THE PATIENT'S RIGHT EYE (OD) ON (B)(6)2020. ON THE SAME DATE, IN A SEPARATE SURGERY, THE LENS WAS EXCHANGED WITH A SHORTER LENGTH LENS DUE TO EXCESSIVE VAULT. THE PROBLEM WAS RESOLVED. Manufacturer Narrative: CORRECTED DATA: H10 - CODE 458…	Lens Exchange	Resolved
https://www.accessdata.fda.gov/scripts/cdrh/cfdocs/cfMAUDE/Detail.CFM?MDRFOI__ID=11616797&pc=QCB	2023826-2021-00840	2020-12-31 05:00:00	Injury	STAAR SURGICAL COMPANY	2021-04-05 04:00:00	QCB	IMPLANTABLE COLLAMER LENS (ICL)	Inadequacy of Device Shape and/or Size	Intraocular Pressure Increased; Appropriate Clinical Signs, Symptoms, Conditions Term / Code Not Available; No Clinical Signs, Symptoms or Conditions	P030016	NA	1	Event Description: THE REPORTER INDICATED THE SURGEON IMPLANTED A 13.2MM TMICL13.2 IMPLANTABLE COLLAMER LENS, -06.50/+2.0/092 (SPHERE/CYLINDER/AXIS), IN THE PATIENTS EYE ON (B)(6) 2020. THE LENS WILL BE EXPLANTED AND EXCHANGED DUE TO OVER VAULT. THE LENS REMAINED IMPLANTED. ADDITIONAL INFORMATION HAS BEEN REQUESTED BUT NONE HAS BEEN FORTHCOMING. IF ADDITIONAL INFORMATION IS RECEIVED, A SUPPLEMENT…	Lens Exchange	Resolved
https://www.accessdata.fda.gov/scripts/cdrh/cfdocs/cfMAUDE/Detail.CFM?MDRFOI__ID=12060666&pc=QCB	2023826-2021-01987	2021-04-15 04:00:00	Injury	STAAR SURGICAL COMPANY	2021-06-24 04:00:00	QCB	IMPLANTABLE COLLAMER LENS (ICL)	Inadequacy of Device Shape and/or Size	Intraocular Pressure Increased; Appropriate Clinical Signs, Symptoms, Conditions Term / Code Not Available; No Clinical Signs, Symptoms or Conditions	N/A	NA	1	Event Description: THE REPORTER INDICATED THAT THE SURGEON IMPLANTED A 12.6MM VTICMO12.6, -14.00/1.5/091 (SPHERE/CYLINDER/AXIS), IMPLANTABLE COLLAMER LENS INTO THE PATIENT'S RIGHT EYE (OD) ON (B)(6) 2021. THE LENS WAS EXPLANTED ON (B)(6) 2021 DUE TO EXCESSIVE VAULT. THIS RESOLVED THE PROBLEM. CAUSE OF THE EVENT IS REPORTED AS UNKNOWN. REPORTEDLY, EYE IS QUIET. AC WAS FINE AFTER LENS REMOVAL. PATI…	Lens Extraction	Resolved
https://www.accessdata.fda.gov/scripts/cdrh/cfdocs/cfMAUDE/Detail.CFM?MDRFOI__ID=14161445&pc=QCB	2023826-2022-01085	2022-02-21 05:00:00	Injury	STAAR SURGICAL COMPANY	2022-04-20 04:00:00	QCB	IMPLANTABLE COLLAMER LENS (ICL)	Inadequacy of Device Shape and/or Size	Intraocular Pressure Increased; Appropriate Clinical Signs, Symptoms, Conditions Term / Code Not Available; No Clinical Signs, Symptoms or Conditions	N/A	NA	1	Event Description: THE REPORTER INDICATED THAT THE SURGEON IMPLANTED A 13.2MM VTICMO13.2, -7.0/2.5/067 (SPHERE/CYLINDER/AXIS), IMPLANTABLE COLLAMER LENS INTO THE PATIENT'S LEFT EYE (OS) ON (B)(6) 2022. THE LENS WAS REPLACED WITH A SHORTER LENGTH LENS DUE TO SIGNIFICANT REDUCTION OF IRIDO-CORNEAL ANGLES AND EXCESSIVE VAULT ON (B)(6) 2022. THIS RESOLVED THE PROBLEM. CAUSE OF THE EVENT IS REPORTED A…	Lens Exchange	Resolved
https://www.accessdata.fda.gov/scripts/cdrh/cfdocs/cfMAUDE/Detail.CFM?MDRFOI__ID=14647638&pc=QCB	2023826-2022-01781	2022-05-10 04:00:00	Injury	STAAR SURGICAL COMPANY	2022-06-09 04:00:00	QCB	IMPLANTABLE COLLAMER LENS (ICL)	Inadequacy of Device Shape and/or Size	Intraocular Pressure Increased; Appropriate Clinical Signs, Symptoms, Conditions Term / Code Not Available; No Clinical Signs, Symptoms or Conditions	P030016	NA	1	Event Description: THE REPORTER INDICATED THAT A 13.2MM, TMICL13.2, -16.50/3.0/076 (SPHERE/CYLINDER/AXIS) IMPLANTABLE COLLAMER LENS WAS EXPLANTED DUE TO SIZING ISSUES. ATTEMPTS TO OBTAIN ADDITIONAL INFORMATION HAVE NOT BEEN SUCCESSFUL. IF ADDITIONAL INFORMATION IS RECEIVED A SUPPLEMENTAL MEDWATCH REPORT WILL BE SUBMITTED Manufacturer Narrative: IMPLANT DATE: UNK. EXPLANT DATE: UNK. (B)(4). CLAIM#…	Lens Exchange	Resolved
https://www.accessdata.fda.gov/scripts/cdrh/cfdocs/cfMAUDE/Detail.CFM?MDRFOI__ID=11308771&pc=QCB	2023826-2021-00318	NA	Injury	STAAR SURGICAL COMPANY	2021-02-10 05:00:00	QCB	IMPLANTABLE COLLAMER LENS (ICL)	Misfocusing; Off-Label Use; Inadequacy of Device Shape and/or Size	Intraocular Pressure Increased; Blurred Vision	N/A	NA	1	Event Description: THE REPORTER INDICATED THAT THE SURGEON IMPLANTED A 12.1MM VTICMO12.1, -15.00/2.0/080 (SPHERE/CYLINDER/AXIS), IMPLANTABLE COLLAMER LENS INTO THE PATIENT'S LEFT EYE (OS) ON (B)(6) 2020. AN ADDITIONAL OF NEW PI, YAG AND THE LENS WAS EXCHANGED WITH A FOR A LONGER LENGTH LENS, DUE TO PUPIL BLOCK WITH ELEVATED IOP (32MMHG) AND ANGLE CLOSURE WITH ELEVATED IOP (32MMHG) OBSERVED ON (B)…	Lens Exchange + Secondary Operation	Resolved
https://www.accessdata.fda.gov/scripts/cdrh/cfdocs/cfMAUDE/Detail.CFM?MDRFOI__ID=11787674&pc=QCB	2023826-2021-01388	2021-04-01	Injury	STAAR SURGICAL COMPANY	2021-05-06	QCB	IMPLANTABLE COLLAMER LENS (ICL)	Misfocusing	Intraocular Pressure Increased; Blurred Vision	NA	NA	1	Event Description: THE REPORTER INDICATED THAT A 13.2MM, VTICM5_13.2, -13.00/2.5/080 (SPHERE/CYLINDER/AXIS), IMPLANTABLE COLLAMER LENS WAS IMPLANTED INTO THE PATIENTS LEFT EYE (OS) ON (B)(6) 2020. THE PATIENT EXPERIENCED REFRACTIVE SURPRISE AND ELEVATED IOP. LENS REMAINS IMPLANTED. FOR STATUS OF THE EYE " PATIENT CANNOT READ ANYMORE " WAS REPORTED. FOR ADDITIONAL INFORMATION THE REPORTER REPORTED…	Lens Retention	Resolved
https://www.accessdata.fda.gov/scripts/cdrh/cfdocs/cfMAUDE/Detail.CFM?MDRFOI__ID=14507171&pc=QCB	2023826-2022-01692	2022-04-25 04:00:00	Injury	STAAR SURGICAL COMPANY	2022-05-26 04:00:00	QCB	IMPLANTABLE COLLAMER LENS (ICL)	Device Dislodged or Dislocated	Intraocular Pressure Increased; Blurred Vision	P030016	NA	1	Event Description: THE REPORTER INDICATED THAT A 13.2MM VTICMO13.2 IMPLANTABLE COLLAMER LENS OF -18.00/2.5/114 (SPHERE/CYLINDER/AXIS) WAS IMPLANTED INTO THE PATIENTS LEFT EYE (OS) ON (B)(6) 2022. ONE HAPTIC WAS NOTED TO BE TORN AFTER IMPLANTATION. PATIENT EXPERIENCED ELEVATED INTRAOCULAR PRESSURE, SUBLUXATION AND LESS VISION. MANAGEMENT WAS GIVEN FOR ELEVATED INTRAOCULAR PRESSURE. LENS REMAINS IM…	Lens Exchange	Resolved
https://www.accessdata.fda.gov/scripts/cdrh/cfdocs/cfMAUDE/Detail.CFM?MDRFOI__ID=17962122&pc=QCB	2023826-2023-04570	2023-06-22 04:00:00	Injury	STAAR SURGICAL COMPANY	2023-10-18 04:00:00	QCB	IMPLANTABLE COLLAMER LENS (ICL)	Misfocusing; Off-Label Use; Patient-Device Incompatibility	Intraocular Pressure Increased; Blurred Vision	P030016	NA	1	Event Description: THE REPORTER INDICATED THAT A 12.6MM VTICMO12.6 IMPLANTABLE COLLAMER LENS OF -13.5/6.0/090 (SPHERE/CYLINDER/AXIS) WAS IMPLANTED INTO THE LEFT EYE (OS) OF A PATIENT WITH PRE-EXISTING KERATOCONUS ON (B)(6) 2023. ON (B)(6) 2023, THE LENS WAS REMOVED DUE TO REFRACTIVE SUPRISE. THE PROBLEM WAS NOT RESOLVED. STATUS OF THE EYE IS "STABLE." CAUSE OF THE EVENT IS A PATIENT-RELATED-FACTO…	Lens Extraction	Not_Resolved
https://www.accessdata.fda.gov/scripts/cdrh/cfdocs/cfMAUDE/Detail.CFM?MDRFOI__ID=10875424&pc=QCB	2023826-2020-02715	2020-07-18 04:00:00	Injury	STAAR SUGICAL COMPANY	2020-11-20 05:00:00	QCB	IMPLANTABLE COLLAMER LENS (ICL)	Device Dislodged or Dislocated; Optical Problem	Intraocular Pressure Increased; Blurred Vision; Appropriate Clinical Signs, Symptoms, Conditions Term / Code Not Available	NA	NA	1	Event Description: THE REPORTER INDICATED THAT A12.6MM, VTICMO12.6, -16.0/+1.5/105 (SPHERE/CYLINDER/AXIS), IMPLANTABLE COLLAMER LENS WAS IMPLANTED INTO THE PATIENTS LEFT EYE (OS) ON (B)(6) 2020. ON (B)(6) 2020 THE LENS WAS EXPLANTED DUE TO "TILTED ICL", ELEVATED IOP, PUPIL BLOCK, LENS DISLOCATION/SUBLUXATION AND BLURRED VISION. ADDITION OF NEW PI WAS PERFORMED AND A REPLACEMENT LENS OF SHORTER LE…	Lens Exchange + Secondary Operation	Resolved
https://www.accessdata.fda.gov/scripts/cdrh/cfdocs/cfMAUDE/Detail.CFM?MDRFOI__ID=11070811&pc=QCB	2023826-2020-03177	2020-11-19 05:00:00	Injury	STAAR SURGICAL COMPANY	2020-12-24 05:00:00	QCB	IMPLANTABLE COLLAMER LENS (ICL)	Inadequacy of Device Shape and/or Size; Adverse Event Without Identified Device or Use Problem	Intraocular Pressure Increased; Blurred Vision; Appropriate Clinical Signs, Symptoms, Conditions Term / Code Not Available	P030016	NA	1	Event Description: THE REPORTER INDICATED THAT AN IMPLANTABLE COLLAMER LENS WAS IMPLANTED INTO THE PATIENTS EYE AND THE PATIENT EXPERIENCED HIGH VAULT AND IOP (INTRAOCULAR PRESSURE), UNRESPONSIVE TO MAXIMUM MEDICAL THERAPY. DOCTOR EXPLANTED THE LENS AS HE COULD NOT REDUCE THE IOP ADEQUATELY. ADDITIONAL INFORMATION HAS BEEN REQUESTED BUT NONE HAS BEEN FORTHCOMING. IF ADDITIONAL INFORMATION IS RECE…	Lens Extraction	Resolved
https://www.accessdata.fda.gov/scripts/cdrh/cfdocs/cfMAUDE/Detail.CFM?MDRFOI__ID=11308736&pc=QCB	2023826-2021-00317	NA	Injury	STAAR SURGICAL COMPANY	2021-02-10 05:00:00	QCB	IMPLANTABLE COLLAMER LENS (ICL)	Misfocusing; Off-Label Use; Inadequacy of Device Shape and/or Size; Device Dislodged or Dislocated	Intraocular Pressure Increased; Blurred Vision; Appropriate Clinical Signs, Symptoms, Conditions Term / Code Not Available	N/A	NA	1	Event Description: THE REPORTER INDICATED THAT THE SURGEON IMPLANTED A 12.1MM VTICMO12.1, -13.50/1.5/105 (SPHERE/CYLINDER/AXIS), IMPLANTABLE COLLAMER LENS INTO THE PATIENT'S RIGHT EYE (OD) ON (B)(6) 2020. AN ADDITIONAL OF NEW PI, YAG AND THE LENS WAS EXCHANGED WITH A FOR A LONGER LENGTH LENS, DUE TO PUPIL BLOCK WITH ELEVATED IOP (32MMHG) AND ANGLE CLOSURE WITH ELEVATED IOP ((32MMHG) OBSERVED ON (…	Lens Exchange + Secondary Operation	Resolved
https://www.accessdata.fda.gov/scripts/cdrh/cfdocs/cfMAUDE/Detail.CFM?MDRFOI__ID=11366547&pc=QCB	2023826-2021-00485	2020-12-18	Injury	STAAR SURGICAL COMPANY	2021-02-23	QCB	IMPLANTABLE COLLAMER LENS (ICL)	Inadequacy of Device Shape and/or Size	Intraocular Pressure Increased; Blurred Vision; Appropriate Clinical Signs, Symptoms, Conditions Term / Code Not Available	N/A	NA	1	Event Description: THE REPORTER INDICATED THAT A 12.6MM VTICM5_12.6, -8.5/+1.0/076 (SPHERE/CYLINDER/AXIS) IMPLANTABLE COLLAMER LENS WAS IMPLANTED INTO THE PATIENT'S LEFT EYE (OS) ON (B)(6) 2020. THE SURGEON REPORTS EXCESSIVE VAULT, TRANSIENT LOSS OF BCVA, ELEVATED IOP, SIGNIFICANT REDUCTION OF IRIDO-CORNEAL ANGLES (ICA), PERIPHERAL ANTERIOR SYNECHIA (PAS), AND A "LITTLE" MYDRIASIS. AN ADDITION OF…	Lens Retention + Secondary Operation	Resolved
https://www.accessdata.fda.gov/scripts/cdrh/cfdocs/cfMAUDE/Detail.CFM?MDRFOI__ID=11939022&pc=QCB	2023826-2021-01669	2021-05-11 04:00:00	Injury	STAAR SURGICAL COMPANY	2021-06-04 04:00:00	QCB	IMPLANTABLE COLLAMER LENS (ICL)	Misfocusing; Inadequacy of Device Shape and/or Size	Intraocular Pressure Increased; Blurred Vision; Appropriate Clinical Signs, Symptoms, Conditions Term / Code Not Available	P030016	NA	1	Event Description: THE REPORTER INDICATED THAT THE SURGEON IMPLANTED A 13.2MM TMICL3.2, -16.00/2.0/107 (SPHERE/CYLINDER/AXIS), IMPLANTABLE COLLAMER LENS INTO THE PATIENT'S RIGHT EYE (OD) ON (B)(6) 2021. THE LENS WAS EXPLANTED DUE TO ANGLE CLOSURE WITH ELEVATED IOP(32MMHG, ASSESSED ON (B)(6) 2021) ON (B)(6) 2021. THIS RESOLVED THE PROBLEM.CAUSE OF THE EVENT IS REPORTED AS DEVICE. Manufacturer Narr…	Lens Extraction	Resolved
https://www.accessdata.fda.gov/scripts/cdrh/cfdocs/cfMAUDE/Detail.CFM?MDRFOI__ID=11939023&pc=QCB	2023826-2021-01670	2021-05-11 04:00:00	Injury	STAAR SURGICAL COMPANY	2021-06-04 04:00:00	QCB	IMPLANTABLE COLLAMER LENS (ICL)	Misfocusing; Inadequacy of Device Shape and/or Size	Intraocular Pressure Increased; Blurred Vision; Appropriate Clinical Signs, Symptoms, Conditions Term / Code Not Available	P030016	NA	1	Event Description: THE REPORTER INDICATED THAT THE SURGEON IMPLANTED A 13.2MM TMICL3.2, -16.50/2.0/065 (SPHERE/CYLINDER/AXIS), IMPLANTABLE COLLAMER LENS INTO THE PATIENT'S LEFT EYE (OS) ON (B)(6) 2021. THE LENS WAS EXPLANTED DUE TO PUPIL BLOCK WITH ELEVATED IOP (25MMHG, ASSESSED ON (B)(6) 2021) AND EXCESSIVE VAULT ON (B)(6) 2021. THIS RESOLVED THE PROBLEM.CAUSE OF THE EVENT IS REPORTED AS DEVICE.…	Lens Extraction	Resolved
https://www.accessdata.fda.gov/scripts/cdrh/cfdocs/cfMAUDE/Detail.CFM?MDRFOI__ID=12222320&pc=QCB	2023826-2021-02802	2021-05-29 04:00:00	Injury	STAAR SURGICAL COMPANY	2021-07-23 04:00:00	QCB	IMPLANTABLE COLLAMER LENS (ICL)	Inadequacy of Device Shape and/or Size	Intraocular Pressure Increased; Blurred Vision; Appropriate Clinical Signs, Symptoms, Conditions Term / Code Not Available	N/A	NA	1	Event Description: THE REPORTER INDICATED THAT THE SURGEON IMPLANTED A 13.2MM VTICM5_13.2 IMPLANTABLE COLLAMER LENS, -11.5/+3.5/095 (SPHERE/CYLINDER/AXIS) INTO THE PATIENT'S RIGHT EYE (OD) ON (B)(6) 2021. ON (B)(6) 2021 THE LENS WAS EXPLANTED DUE TO EXCESSIVE VAULT, ELEVATED IOP, AND SECTORAL IRIS ATROPY. THE CAUSE OF THE EVENT IS REPORTED AS DEVICE. REPORTEDLY THE PROBLEM IS NOT RESOLVED THOUGH …	Lens Exchange	Resolved
https://www.accessdata.fda.gov/scripts/cdrh/cfdocs/cfMAUDE/Detail.CFM?MDRFOI__ID=12874494&pc=QCB	2023826-2021-04515	2021-10-05 04:00:00	Injury	STAAR SURGICAL COMPANY	2021-11-25 05:00:00	QCB	IMPLANTABLE COLLAMER LENS (ICL)	Adverse Event Without Identified Device or Use Problem	Intraocular Pressure Increased; Blurred Vision; Appropriate Clinical Signs, Symptoms, Conditions Term / Code Not Available	P030016	NA	1	Event Description: THE REPORTER INDICATED THAT A 12.6MM, TMICL12.6, -14.5/2.5/62, IMPLANTABLE COLLAMER LENS WAS IMPLANTED INTO THE PATIENTS LEFT EYE (OS) ON (B)(6) 2021. ON (B)(6) 2021 THE LENS WAS REMOVED AND LATER REPLACED WITH A SHORTER LENGTH LENS OF DIFFERENT POWER DUE TO ANGLE CLOSURE WITH ELEVATED IOP. IT WAS REPORTED THAT THE PROBLEM RESOLVED. FOR STATUS OF THE EYE "BLURRY VISION" WAS REP…	Lens Exchange	Resolved
https://www.accessdata.fda.gov/scripts/cdrh/cfdocs/cfMAUDE/Detail.CFM?MDRFOI__ID=14061327&pc=QCB	2023826-2022-01130	2022-01-29 05:00:00	Injury	STAAR SURGICAL COMPANY	2022-04-08 04:00:00	QCB	IMPLANTABLE COLLAMER LENS (ICL)	Misfocusing	Intraocular Pressure Increased; Blurred Vision; Appropriate Clinical Signs, Symptoms, Conditions Term / Code Not Available	N/A	NA	1	Event Description: THE REPORTER INDICATED THAT A 12.6MM VTICM5_12.6, -13.0/+2.0/081 (SPHERE/CYLINDER/AXIS) IMPLANTABLE COLLAMER LENS WAS IMPLANTED INTO THE PATIENT'S RIGHT EYE (OD) ON (B)(6) 2021. ON (B)(6) 2022 THE LENS WAS REPOSITIONED DUE TO BLURRED VISION, IRIS SPHINCTER LOSS AT 5 O'CLOCK, HEAVILY PIGMENTS TM, KIV EXPLANT, AND IRREGULAR PUPIL. THE PROBLEM WAS NOT RESOLVED. REPORTEDLY THE LENS…	Lens Repositioning	Not_Resolved
https://www.accessdata.fda.gov/scripts/cdrh/cfdocs/cfMAUDE/Detail.CFM?MDRFOI__ID=15221446&pc=QCB	2023826-2022-02760	2020-12-08 05:00:00	Injury	STAAR SURGICAL COMPANY	2022-08-12 04:00:00	QCB	IMPLANTABLE COLLAMER LENS (ICL)	Misfocusing; Off-Label Use; Inadequacy of Device Shape and/or Size	Intraocular Pressure Increased; Blurred Vision; Appropriate Clinical Signs, Symptoms, Conditions Term / Code Not Available	P030016	NA	1	Event Description: THE REPORTER INDICATED THAT A 12.6MM VTICMO12.6 IMPLANTABLE COLLAMER LENS -10.0/1.0/075 (SPHERE/CYLINDER/AXIS) WAS IMPLANTED INTO THE PATIENT'S RIGHT EYE (OD) ON (B)(6) 2020. ON (B)(6) 2021 THE LENS WAS EXCHANGED FOR SHORTER LENGTH LENS OF DIFFERENT POWER DUE TO EXCESSIVE VAULT, REFRACTIVE SURPRISE, ELEVATED INTRAOCULAR PRESSURE AND SIGNIFICANT REDUCTION OF IRIDO-CORNEAL ANGELS…	Lens Exchange	Resolved
https://www.accessdata.fda.gov/scripts/cdrh/cfdocs/cfMAUDE/Detail.CFM?MDRFOI__ID=15556104&pc=QCB	2023826-2022-03511	2022-03-08 05:00:00	Injury	STAAR SURGICAL COMPANY	2022-10-06 04:00:00	QCB	IMPLANTABLE COLLAMER LENS (ICL)	Misfocusing	Intraocular Pressure Increased; Blurred Vision; Appropriate Clinical Signs, Symptoms, Conditions Term / Code Not Available	P030016	NA	1	Event Description: THE REPORTER INDICATED THAT A 12.6MM VTICMO12.6 IMPLANTABLE COLLAMER LENS OF -12.00/6.0/086 (SPHERE/CYLINDER/AXIS) WAS IMPLANTED INTO THE PATIENT'S LEFT EYE (OS) ON (B)(6) 2022. ON (B)(6) 2022 THE LENS WAS EXPLANTED DUE TO HIGH INTRAOCULAR PRESSURE WITH ANGLE CLOSURE AND CHANGE IN REFRACTION. CLOUDY CORNEA WAS ALSO REPORTED, HOWEVER THE REPORTER STATED, " REGARDING THE SYMPTOMS…	Lens Extraction	Resolved
https://www.accessdata.fda.gov/scripts/cdrh/cfdocs/cfMAUDE/Detail.CFM?MDRFOI__ID=17600761&pc=QCB	2023826-2023-03684	2023-07-07 04:00:00	Malfunction	STAAR SURGICAL COMPANY	2023-08-23 04:00:00	QCB	IMPLANTABLE COLLAMER LENS (ICL)	Misfocusing; Off-Label Use; Inadequacy of Device Shape and/or Size; Optical Problem	Intraocular Pressure Increased; Blurred Vision; Appropriate Clinical Signs, Symptoms, Conditions Term / Code Not Available	P030016	NA	1	Event Description: THE REPORTER INDICATED THAT THE SURGEON IMPLANTED A 12.6MM VTICMO12.6; -3.00/+3.00/126 (SPHERE/CYLINDER/AXIS) IMPLANTABLE COLLAMER LENS INTO THE PATIENT'S RIGHT EYE (OD) ON (B)(6) 2023. THE PATIENT EXPERIENCED EXCESSIVE VAULTING, ELEVATED INTRAOCULAR PRESSURE, SIGNIFICANT REDUCTION OF IRIDO-CORNEAL ANGLES, GLARE/HALOES AND BLURRED VISION. LENS REMAINS IMPLANTED. THE CAUSE OF TH…	Lens Retention	Unknown
https://www.accessdata.fda.gov/scripts/cdrh/cfdocs/cfMAUDE/Detail.CFM?MDRFOI__ID=17608279&pc=QCB	2023826-2023-03689	2023-07-07 04:00:00	Malfunction	STAAR SURGICAL COMPANY	2023-08-23 04:00:00	QCB	IMPLANTABLE COLLAMER LENS (ICL)	Misfocusing; Off-Label Use; Inadequacy of Device Shape and/or Size; Optical Problem	Intraocular Pressure Increased; Blurred Vision; Appropriate Clinical Signs, Symptoms, Conditions Term / Code Not Available	P030016	NA	1	Event Description: THE REPORTER INDICATED THAT THE SURGEON IMPLANTED A 12.6MM VTICMO12.6; -6.00/+5.50/84 (SPHERE/CYLINDER/AXIS) IMPLANTABLE COLLAMER LENS INTO THE PATIENT'S LEFT EYE (OS) ON (B)(6) 2023. THE PATIENT EXPERIENCED EXCESSIVE VAULTING, ELEVATED INTRAOCULAR PRESSURE, SIGNIFICANT REDUCTION OF IRIDO-CORNEAL ANGLES, GLARE/HALOES AND BLURRED VISION. LENS REMAINS IMPLANTED. THE CAUSE OF THE …	Lens Retention	Unknown
https://www.accessdata.fda.gov/scripts/cdrh/cfdocs/cfMAUDE/Detail.CFM?MDRFOI__ID=17701985&pc=QCB	2023826-2023-03775	2021-09-24 04:00:00	Injury	STAAR SURGICAL COMPANY	2023-09-07 04:00:00	QCB	IMPLANTABLE COLLAMER LENS (ICL)	Adverse Event Without Identified Device or Use Problem	Intraocular Pressure Increased; Blurred Vision; Appropriate Clinical Signs, Symptoms, Conditions Term / Code Not Available	P030016	NA	1	Event Description: THE REPORTER INDICATED THAT A 13.2MM VTICMO13.2 IMPLANTABLE COLLAMER LENS OF -5.00/0.5/081 (SPHERE/CYLINDER/AXIS) WAS IMPLANTED INTO THE PATIENT'S RIGHT EYE (OD) ON (B)(6) 2021. THE PATIENT PRESENTED WITH BLURRED VISION, PIGMENT DISPERSION AND ELEVATED IOP IN THE EARLY POST-OP PERIOD. IT WAS REPORTED THAT THE PROBLEM RESOLVED WITH MEDICAL MANAGEMENT. THE REPORTER STATES THAT TH…	Lens Retention	Resolved
https://www.accessdata.fda.gov/scripts/cdrh/cfdocs/cfMAUDE/Detail.CFM?MDRFOI__ID=17705120&pc=QCB	2023826-2023-03951	2021-07-24 04:00:00	Injury	STAAR SURGICAL COMPANY	2023-09-07 04:00:00	QCB	IMPLANTABLE COLLAMER LENS (ICL)	Adverse Event Without Identified Device or Use Problem	Intraocular Pressure Increased; Blurred Vision; Appropriate Clinical Signs, Symptoms, Conditions Term / Code Not Available	P030016	NA	1	Event Description: THE REPORTER INDICATED THAT A 12.6MM VTICM5 12.6 IMPLANTABLE COLLAMER LENS OF -9.5/2.0/093 (SPHERE/CYLINDER/AXIS) WAS IMPLANTED INTO THE PATIENT'S RIGHT EYE (OD) ON (B)(6) 2021. THE PATIENT PRESENTED BLURRED VISION, PIGMENT DISPERSION AND ELEVATED IOP IN THE EARLY POST-OP PERIOD. IT WAS REPORTED THAT THE PROBLEM RESOLVED WITH MEDICAL MANAGEMENT. THE REPORTER STATES THAT THE DIS…	Lens Retention	Resolved
https://www.accessdata.fda.gov/scripts/cdrh/cfdocs/cfMAUDE/Detail.CFM?MDRFOI__ID=17885010&pc=QCB	2023826-2023-04315	2023-08-15 04:00:00	Injury	STAAR SURGICAL COMPANY	2023-10-06 04:00:00	QCB	IMPLANTABLE COLLAMER LENS (ICL)	Misfocusing; Inadequacy of Device Shape and/or Size	Intraocular Pressure Increased; Blurred Vision; Appropriate Clinical Signs, Symptoms, Conditions Term / Code Not Available	P030016	NA	1	Event Description: THE REPORTER INDICATED THE SURGEON IMPLANTED A 13.2MM VTICM5_13.2 IMPLANTABLE COLLAMER LENS, -09.50/+0.5/069 (SPHERE/CYLINDER/AXIS), INTO THE PATIENTS RIGHT EYE (OD) ON (B)(6) 2020. THE LENS HAD A LOW VAULT. THE PATIENT EXPERIENCED ELEVATED INTRAOCULAR PRESSURE (IOP), PIGMENT DISPERSION AND BLURRED VISION. OCT PERFORMED ON (B)(6) 2023 REVEALED RNFL DAMAGE AND TEMPORAL SCOTOMA. …	Lens Retention + Secondary Operation	Not_Resolved
https://www.accessdata.fda.gov/scripts/cdrh/cfdocs/cfMAUDE/Detail.CFM?MDRFOI__ID=18525781&pc=QCB	2023826-2024-00170	2023-12-12 05:00:00	Injury	STAAR SURGICAL COMPANY	2024-01-17 05:00:00	QCB	IMPLANTABLE COLLAMER LENS (ICL)	Misfocusing	Intraocular Pressure Increased; Blurred Vision; Appropriate Clinical Signs, Symptoms, Conditions Term / Code Not Available	P030016	NA	1	Event Description: THE REPORTER INDICATED THAT A 12.6MM, VTICM512.6, -11.50/3.5/090 (SPHERE/CYLINDER/AXIS), IMPLANTABLE COLLAMER LENS WAS IMPLANTED INTO THE PATIENT'S RIGHT EYE (OD) ON (B)(6) 2023. ANTERIOR CHAMBER IRRIGATION/VACUATION OF VISCO/FLUIDS AND ANTERIOR CHAMBER WASH ON (B)(6) 2023. THE LENS WAS EXPLANTED ON (B)(6) 2023 DUE TO ELEVATED IOP(40MMHG) WITHOUT PUPIL BLOCK AND ANGLE CLOSURE(D…	Lens Extraction + Secondary Operation	Not_Resolved
https://www.accessdata.fda.gov/scripts/cdrh/cfdocs/cfMAUDE/Detail.CFM?MDRFOI__ID=8618161&pc=QCB	2023826-2019-00798	2019-04-16 04:00:00	Injury	STAAR SURGICAL COMPANY	2019-05-16 04:00:00	QCB	IMPLANTABLE COLLAMER LENS (ICL)	Misfocusing; Inadequacy of Device Shape and/or Size	Intraocular Pressure Increased; Blurred Vision; No Code Available	P030016	NA	1	Event Description: THE REPORTER INDICATED THE SURGEON IMPLANTED A 12.6MM TMICL12.6 IMPLANTABLE COLLAMER LENS, - 15.5/+2.0/066 (SPHERE/CYLINDER/AXIS), IN THE PATIENT'S LEFT EYE (OS) ON (B)(6) 2019. THE LENS WAS EXPLANTED ON (B)(6) 2019 DUE TO EXCESSIVE VAULTING, ELEVATED INTRAOCULAR PRESSURE (IOP) AND BLURRED VISION. THE LENS WAS EXCHANGED FOR A SHORTER LENS AND THE PROBLEM WAS RESOLVED. THE CAUSE…	Lens Exchange	Resolved
https://www.accessdata.fda.gov/scripts/cdrh/cfdocs/cfMAUDE/Detail.CFM?MDRFOI__ID=9282596&pc=QCB	2023826-2019-02091	2019-10-02 04:00:00	Injury	STAAR SURGICAL COMPANY	2019-11-05 05:00:00	QCB	IMPLANTABLE COLLAMER LENS (ICL)	Inadequacy of Device Shape and/or Size	Intraocular Pressure Increased; Blurred Vision; No Code Available	P030016	NA	1	Event Description: THE REPORTER INDICATED THAT A 13.2MM, TMICL13.2, -13.5/1.0/135 (SPHERE/CYLINDER/AXIS), IMPLANTABLE COLLAMER LENS WAS IMPLANTED INTO THE PATIENTS LEFT EYE (OS) ON (B)(6) 2019. ON (B)(6) 2019 THE LENS WAS EXPLANTED DUE TO EXCESSIVE VAULT, PUPIL BLOCK WITH ELEVATED IOP (INTRAOCULAR PRESSURE) AND BLURRED VISION. A REPLACEMENT LENS OF SHORTER LENGTH WAS LATER IMPLANTED AND THE PROBL…	Lens Exchange	Resolved
https://www.accessdata.fda.gov/scripts/cdrh/cfdocs/cfMAUDE/Detail.CFM?MDRFOI__ID=11558794&pc=QCB	2023826-2021-00700	2021-02-23 05:00:00	Injury	STAAR SURGICAL COMPANY	2021-03-23 04:00:00	QCB	IMPLANTABLE COLLAMER LENS	Misfocusing; Inadequacy of Device Shape and/or Size; Optical Problem	Intraocular Pressure Increased; Blurred Vision; Visual Disturbances; Appropriate Clinical Signs, Symptoms, Conditions Term / Code Not Available	P030016	NA	1	Event Description: THE REPORTER INDICATED THAT THE SURGEON IMPLANTED A 13.2MM TMICL13.2 IMPLANTABLE COLLAMER LENS -15.5/+2.5/091 (SPHERE/CYLINDER/AXIS) INTO THE PATIENT'S LEFT (OS) EYE. THE SURGEON REPORTS IOP CONTROLLED WITH ALPHAGAM, HIGH VAULT, SHALLOW AC, "CRAPPY" VISION AT 20/200. PUPIL IS DILATED AND AR IS +2.75. Manufacturer Narrative: B5-ADDITIONAL INFORMATION: REFRACTIVE SURPRISE, SIGNIF…	Lens Retention	Unknown
https://www.accessdata.fda.gov/scripts/cdrh/cfdocs/cfMAUDE/Detail.CFM?MDRFOI__ID=13664235&pc=QCB	2023826-2022-00658	2022-01-14 05:00:00	Injury	STAAR SURGICAL COMPANY	2022-03-03 05:00:00	QCB	IMPLANTABLE COLLAMER LENS	Misfocusing; Inadequacy of Device Shape and/or Size; Optical Problem	Intraocular Pressure Increased; Blurred Vision; Visual Disturbances; Appropriate Clinical Signs, Symptoms, Conditions Term / Code Not Available; No Clinical Signs, Symptoms or Conditions	P030016	NA	1	Event Description: THE REPORTER INDICATED THAT THE SURGEON IMPLANTED A 13.2MM TMICL13.2 IMPLANTABLE COLLAMER LENS -13.5/+2.5/103 (SPHERE/CYLINDER/AXIS) INTO THE PATIENT'S EYE. THE LENS WAS EXPLANTED AND REPLACED WITH A SHORTER LENS DUE TO EXCESSIVE VAULT. ATTEMPTS TO OBTAIN ADDITIONAL INFORMATION HAVE NOT BEEN SUCCESSFUL. Manufacturer Narrative: B5-ADDITIONAL INFORMATION: THE LENS WAS IMPLANTED I…	Lens Exchange + Secondary Operation	Resolved
https://www.accessdata.fda.gov/scripts/cdrh/cfdocs/cfMAUDE/Detail.CFM?MDRFOI__ID=18060314&pc=QCB	2023826-2023-04944	2023-10-18 04:00:00	Injury	STAAR SURGICAL COMPANY	2023-11-02 04:00:00	QCB	IMPLANTABLE COLLAMER LENS (ICL)	Misfocusing; Inadequacy of Device Shape and/or Size; Device Dislodged or Dislocated; Optical Problem	Intraocular Pressure Increased; Blurred Vision; Visual Disturbances; Discomfort; Appropriate Clinical Signs, Symptoms, Conditions Term / Code Not Available	P030016	NA	1	Event Description: THE REPORTER INDICATED THAT AN IMPLANTABLE COLLAMER LENS OF UNKNOWN MODEL AND SIZE WAS IMPLANTED. DOCTOR REQUESTED CONSULTATION FOR PATIENT WITH ICL ROTATION AND PIGMENT DISPERSION. THE LENS REMAINS IMPLANTED. NO FURTHER INFORMATION HAS BEEN PROVIDED. ATTEMPTS TO OBTAIN ADDITIONAL INFORMATION HAVE NOT BEEN SUCCESSFUL. IF ADDITIONAL INFORMATION IS RECEIVED A SUPPLEMENTAL MEDWATC…	Lens Retention + Secondary Operation	Unknown
https://www.accessdata.fda.gov/scripts/cdrh/cfdocs/cfMAUDE/Detail.CFM?MDRFOI__ID=9112743&pc=QCB	2023826-2019-01626	2019-04-11 04:00:00	Malfunction	STAAR SURGICAL COMPANY	2019-09-24 04:00:00	QCB	IMPLANTABLE COLLAMER LENS (ICL)	Off-Label Use; Inadequacy of Device Shape and/or Size; Device Dislodged or Dislocated; Optical Problem	Intraocular Pressure Increased; Blurred Vision; Visual Disturbances; Halo	N/A	NA	1	Event Description: THE REPORTER INDICATED THAT A 12.1MM, VTICH12.1, -8.00/1.5/90 (SPHERE/CYLINDER/AXIS), IMPLANTABLE COLLAMER LENS WAS IMPLANTED INTO THE PATIENTS RIGHT EYE (OD) ON (B)(6) 2019. THE LENS WAS REMOVED WITHIN THE SAME SURGERY DUE TO EXCESSIVE VAULT, ELEVATED IOP, LENS DISLOCATION/SUBLUXATION, GLARE/HALOES, AND BLURRED VISION. ON (B)(6) 2019 A REPLACEMENT LENS OF SHORTER LENGTH WAS IM…	Lens Exchange	Resolved
https://www.accessdata.fda.gov/scripts/cdrh/cfdocs/cfMAUDE/Detail.CFM?MDRFOI__ID=12140318&pc=QCB	2023826-2021-02397	2021-06-10	Injury	STAAR SURGICAL COMPANY	2021-07-08	QCB	IMPLANTABLE COLLAMER LENS (ICL)	Misfocusing; Inadequacy of Device Shape and/or Size; Optical Problem	Intraocular Pressure Increased; Blurred Vision; Visual Disturbances; Halo	P030016	NA	1	Event Description: THE REPORTER INDICATED THE SURGEON IMPLANTED A 13.2MM TMICL13.2 IMPLANTABLE COLLAMER LENS, -09.50/+1.0/086 (SPHERE/CYLINDER/AXIS), IN THE PATIENTS RIGHT EYE (OD) ON (B)(6) 2021. THE LENS WAS EXPLANTED ON (B)(6) 2021 DUE TO EXCESSIVE VAULTING, ELEVATED INTRAOCULAR PRESSURE (IOP), GLARE/HALOS AND BLURRED VISION. THE LENS WAS EXCHANGED FOR A SHORTER LENS AND THE PROBLEM WAS RESOLV…	Lens Exchange	Resolved
https://www.accessdata.fda.gov/scripts/cdrh/cfdocs/cfMAUDE/Detail.CFM?MDRFOI__ID=11416136&pc=QCB	2023826-2021-00506	2021-02-09 05:00:00	Injury	STAAR SURGICAL COMPANY	2021-03-04 05:00:00	QCB	IMPLANTABLE COLLAMER LENS (ICL)	Misfocusing; Inadequacy of Device Shape and/or Size; Patient-Device Incompatibility; Optical Problem	Intraocular Pressure Increased; Blurred Vision; Visual Disturbances; Halo; Appropriate Clinical Signs, Symptoms, Conditions Term / Code Not Available	P030016	NA	1	Event Description: THE REPORTER INDICATED THAT A 12.6MM, TMICL12.6, -11.50/3.5/105 (SPHERE/CYLINDER/AXIS), IMPLANTABLE COLLAMER LENS WAS IMPLANTED INTO THE PATIENT'S RIGHT EYE (OD) ON (B)(6) 2021. ELEVATED IOP(44MMHG) WITHOUT PUPIL BLOCK AND ANGLE CLOSURE WAS ASSESSED ON (B)(6) 2021. SIGNIFICANT REDUCTION OF IRIDO-CORNEAL ANGELS, GLARE/HALOES, BLURRED VISION, AND EXCESSIVE VAULT WERE OBSERVED, TH…	Lens Exchange	Resolved
https://www.accessdata.fda.gov/scripts/cdrh/cfdocs/cfMAUDE/Detail.CFM?MDRFOI__ID=11938959&pc=QCB	2023825-2021-01652	2021-04-22	Injury	STAAR SURGICAL COMPANY	2021-06-04	QCB	IMPLANTABLE COLLAMER LENS (ICL)	Misfocusing; Inadequacy of Device Shape and/or Size; Optical Problem	Intraocular Pressure Increased; Blurred Vision; Visual Disturbances; Halo; Appropriate Clinical Signs, Symptoms, Conditions Term / Code Not Available	P030016	NA	1	Event Description: THE REPORTER INDICATED THAT A 13.2MM, TMICL13.2, -14.50/3.5/093 (SPHERE/CYLINDER/AXIS), IMPLANTABLE COLLAMER LENS WAS IMPLANTED INTO THE PATIENT'S LEFT EYE (OS) ON (B)(6) 2021. THE LENS WAS EXCHANGED WITH A SHORTER LENGTH LENS DUE TO SIGNIFICANT REDUCTION OF IRIDO-CORNEAL ANGLES, PUPIL BLOCK WITH ELEVATED IOP(50MMHG), ANGLE CLOSURE WITH ELEVATED IOP, PIGMENT DISPERSION, UNREACT…	Lens Exchange	Resolved
https://www.accessdata.fda.gov/scripts/cdrh/cfdocs/cfMAUDE/Detail.CFM?MDRFOI__ID=14809062&pc=QCB	2023826-2022-01953	2022-05-27 04:00:00	Injury	STAAR SURGICAL COMPANY	2022-06-24 04:00:00	QCB	IMPLANTABLE COLLAMER LENS (ICL)	Inadequacy of Device Shape and/or Size	Intraocular Pressure Increased; Blurred Vision; Visual Disturbances; Halo; Appropriate Clinical Signs, Symptoms, Conditions Term / Code Not Available	P030016	NA	1	Event Description: THE REPORTER INDICATED THAT A 13.2MM VTICM5_13.2 IMPLANTABLE COLLAMER LENS OF -11.00/150/66 (SPHERE/CYLINDER/AXIS) WAS IMPLANTED INTO THE PATIENT'S RIGHT EYE (OD) ON (B)(6) 2020. PATIENT HAS EXPERIENCED EXCESSIVE VAULT, ELEVATED INTRAOCULAR PRESSURE, GLARE/HALOES AND BLURRED VISION. FOR PATIENTS CURRENT CONDITION THE REPORTER STATED " IRIS PERIPHERAL ANTERIOR SYNACHIAE WHICH RE…	Lens Exchange	Resolved
https://www.accessdata.fda.gov/scripts/cdrh/cfdocs/cfMAUDE/Detail.CFM?MDRFOI__ID=17060362&pc=QCB	2023826-2023-02031	2023-05-08 04:00:00	Injury	STAAR SURGICAL COMPANY	2023-06-05 04:00:00	QCB	IMPLANTABLE COLLAMER LENS (ICL)	Misfocusing; Optical Problem	Intraocular Pressure Increased; Blurred Vision; Visual Disturbances; Halo; Appropriate Clinical Signs, Symptoms, Conditions Term / Code Not Available	P030016	NA	1	Event Description: THE REPORTER INDICATED THAT THE SURGEON IMPLANTED A 12.6MM VTICM5_12.6, -13.5/1.5/075 (SPHERE/CYLINDER/AXIS), IMPLANTABLE COLLAMER LENS INTO THE PATIENT'S RIGHT EYE (OD) ON (B)(6)2023. LENS WAS EXPLANTED ON (B)(6) 2023 DUE TO TRANSIENT LOSS OF BCVA (ASSESSED ON (B)(6)2023, ELEVATED IOP (50MMHG) WITHOUT PUPIL BLOCK AND ANGLE CLOSURE (ASSESSED ON (B)(6) 2023). PIGMENT DISPERSION.…	Lens Extraction + Secondary Operation	Unknown
https://www.accessdata.fda.gov/scripts/cdrh/cfdocs/cfMAUDE/Detail.CFM?MDRFOI__ID=6393935&pc=QCB	2023826-2015-00168	NA	Injury	STAAR SURGICAL COMPANY	2017-03-09	QCB	IMPLANTABLE COLLAMER LENS (ICL)	Misfocusing; Inadequacy of Device Shape and/or Size; Optical Problem	Intraocular Pressure Increased; Blurred Vision; Visual Disturbances; Halo; No Code Available	NA	NA	1	Event Description: THE REPORTER INDICATED THE SURGEON IMPLANTED A 13.7MM VTICMO13.7, -11.0/+3.5/174 (SPHERE/CYLINDER/AXIS) IMPLANTABLE COLLAMER LENS IN THE PATIENT'S RIGHT EYE (OD) ON (B)(6) 2014. THE LENS HAS AN EXCESSIVE VAULT. THE PATIENT EXPERIENCED LOSS OF BEST-CORRECTED VISUAL ACUITY, SIGNIFICANT REDUCTION OF THE IRIDO-CORNEAL ANGLES (ICA), UNREACTIVE PUPIL (FIXED), ANGLE CLOSURE WITH ELEVA…	Lens Extraction	Unknown
https://www.accessdata.fda.gov/scripts/cdrh/cfdocs/cfMAUDE/Detail.CFM?MDRFOI__ID=9528011&pc=QCB	2023826-2019-02495	2019-12-05 05:00:00	Injury	STAAR SURGICAL COMPANY	2019-12-27 05:00:00	QCB	IMPLANTABLE COLLAMER LENS (ICL)	Misfocusing; Inadequacy of Device Shape and/or Size; Optical Problem	Intraocular Pressure Increased; Blurred Vision; Visual Disturbances; Halo; No Code Available	P030016	NA	1	Event Description: THE REPORTER INDICATED THE SURGEON IMPLANTED A 12.6MM TMICL12.6 IMPLANTABLE COLLAMER LENS, - 6.50/+2.0/068 (SPHERE/CYLINDER/AXIS), IN THE PATIENT'S EYE. THE LENS WAS EXPLANTED ON (B)(6) 2019 DUE TO HIGH INTRAOCULAR PRESSURE (IOP) AND EXCESSIVE VAULTING. THERE WAS NO PATIENT INJURY. THE LENS WAS NOT REPLACED WITH ANOTHER LENS AT THIS TIME. ADDITIONAL INFORMATION HAS BEEN REQUEST…	Lens Extraction + Secondary Operation	Unknown
https://www.accessdata.fda.gov/scripts/cdrh/cfdocs/cfMAUDE/Detail.CFM?MDRFOI__ID=9528024&pc=QCB	2023826-2019-02494	2019-12-04 05:00:00	Injury	STAAR SURGICAL COMPANY	2019-12-27 05:00:00	QCB	IMPLANTABLE COLLAMER LENS (ICL)	Misfocusing; Inadequacy of Device Shape and/or Size; Optical Problem	Intraocular Pressure Increased; Blurred Vision; Visual Disturbances; Halo; No Code Available	P030016	NA	1	Event Description: THE REPORTER INDICATED THE SURGEON IMPLANTED A 12.6MM TMICL12.6 IMPLANTABLE COLLAMER LENS, - 7.00/+3.0/092 (SPHERE/CYLINDER/AXIS), IN THE PATIENT'S EYE ON (B)(6) 2019. THE LENS WAS EXPLANTED ON (B)(6) 2019 DUE TO HIGH INTRAOCULAR PRESSURE (IOP) AND EXCESSIVE VAULTING. THERE WAS NO PATIENT INJURY. THE LENS WAS NOT REPLACED WITH ANOTHER LENS AT THIS TIME. ADDITIONAL INFORMATION H…	Lens Extraction + Secondary Operation	Unknown
https://www.accessdata.fda.gov/scripts/cdrh/cfdocs/cfMAUDE/Detail.CFM?MDRFOI__ID=10140634&pc=QCB	2023826-2020-01200	NA	Injury	STAAR SURGICAL COMPANY	2020-06-10	QCB	IMPLANTABLE COLLAMER LENS (ICL)	Misfocusing; Optical Problem	Intraocular Pressure Increased; Blurred Vision; Visual Disturbances; Halo; No Code Available	NA	NA	1	Event Description: THE REPORTER INDICATED THAT THE SURGEON IMPLANTED A 12.6MM VTICMO12.6 IMPLANTABLE COLLAMER LENS, -15.0/+1.5/099 (SPHERE/CYLINDER/AXIS), INTO THE PATIENT'S RIGHT EYE (OD) ON (B)(6) 2020. THE PATIENT REPORTS ELEVATED IOP WHICH HAS BEEN RESOLVED BUT PAIN PERSISTS. ALSO REPORTED: FIXED MYDRIASIS, NO RESPONSE TO LIGHT STIMULI, LASER IRIDOTOMY, PILOCARPINE ADMINISTRATION, CONTINUOUS …	Lens Retention + Secondary Operation	Unknown
https://www.accessdata.fda.gov/scripts/cdrh/cfdocs/cfMAUDE/Detail.CFM?MDRFOI__ID=14957809&pc=QCB	2023826-2022-02108	2022-03-31 04:00:00	Injury	STAAR SURGICAL COMPANY	2022-07-08 04:00:00	QCB	IMPLANTABLE COLLAMER LENS (ICL)	Adverse Event Without Identified Device or Use Problem	Intraocular Pressure Increased; Discomfort	P030016	NA	1	Event Description: THE REPORTER INDICATED THAT A 12.6MM, VTICM5_12.6, -4.50/+3.0/92 (SPHERE/CYLINDER/AXIS), IMPLANTABLE COLLAMER LENS WAS IMPLANTED INTO THE PATIENTS RIGHT EYE (OD) ON (B)(6) 2022. ON (B)(6) 2022 THE LENS WAS EXPLANTED DUE TO ELEVATED INTRAOCULAR PRESSURE AND DISCOMFORT. THE EXPLANT RESOLVED THE PROBLEM. IN THE REPORTERS OPINION THE CAUSE OF THE EVENT WAS UNKNOWN. Manufacturer Nar…	Lens Extraction	Resolved
https://www.accessdata.fda.gov/scripts/cdrh/cfdocs/cfMAUDE/Detail.CFM?MDRFOI__ID=14958057&pc=QCB	2023826-2022-02109	2022-03-31 04:00:00	Injury	STAAR SURGICAL COMPANY	2022-07-08 04:00:00	QCB	IMPLANTABLE COLLAMER LENS (ICL)	Adverse Event Without Identified Device or Use Problem	Intraocular Pressure Increased; Discomfort	P030016	NA	1	Event Description: THE REPORTER INDICATED THAT A 12.6MM, VTICM5_12.6, -5.0/+4.0/65 (SPHERE/CYLINDER/AXIS), IMPLANTABLE COLLAMER LENS WAS IMPLANTED INTO THE PATIENTS LEFT EYE (OS) ON (B)(6) 2022. ON (B)(6) 2022 THE LENS WAS EXPLANTED DUE TO ELEVATED INTRAOCULAR PRESSURE AND DISCOMFORT. THE EXPLANT RESOLVED THE PROBLEM. IN THE REPORTERS OPINION THE CAUSE OF THE EVENT WAS UNKNOWN. Manufacturer Narra…	Lens Extraction	Resolved
https://www.accessdata.fda.gov/scripts/cdrh/cfdocs/cfMAUDE/Detail.CFM?MDRFOI__ID=8908414&pc=QCB	2023826-2019-01486	2019-06-28 04:00:00	Injury	STAAR SURGICAL COMPANY	2019-08-19 04:00:00	QCB	IMPLANTABLE COLLAMER LENS (ICL)	Inadequacy of Device Shape and/or Size	Intraocular Pressure Increased; Discomfort; No Code Available	NA	NA	1	Event Description: THE REPORTER INDICATED THE SURGEON IMPLANTED A 13.7MM VTICMO13.7 IMPLANTABLE COLLAMER LENS, -17.50/+3.0/106 (SPHERE/CYLINDER/AXIS) IN THE PATIENTS RIGHT EYE (OD) ON (B)(6) 2019. THE REPORTER INDICATED THE LENS HAD EXCESSIVE VAULTING, ANGLE CLOSURE, WITH ELEVATED INTRAOCULAR PRESSURE. THE PATIENT REPORTED DISCOMFORT. THE LENS WILL BE EXPLANTED BUT TO DATE THE LENS REMAINS IMPLAN…	Lens Retention	Unknown
https://www.accessdata.fda.gov/scripts/cdrh/cfdocs/cfMAUDE/Detail.CFM?MDRFOI__ID=8913315&pc=QCB	2023826-2019-01487	2019-06-29 04:00:00	Injury	STAAR SURGICAL COMPANY	2019-08-20 04:00:00	QCB	IMPLANTABLE COLLAMER LENS (ICL)	Off-Label Use; Inadequacy of Device Shape and/or Size	Intraocular Pressure Increased; Discomfort; No Code Available	NA	NA	1	Event Description: THE REPORTER INDICATED THE SURGEON IMPLANTED A 13.7MM VTICMO13.7 IMPLANTABLE COLLAMER LENS, -17.50/+2.5/094 (SPHERE/CYLINDER/AXIS) IN THE PATIENTS LEFT EYE (OS) ON (B)(6) 2019. THE REPORTER INDICATED THE LENS HAD EXCESSIVE VAULTING, ANGLE CLOSURE, WITH ELEVATED INTRAOCULAR PRESSURE. THE PATIENT REPORTED DISCOMFORT. THE LENS WILL BE EXPLANTED BUT TO DATE THE LENS REMAINS IMPLANT…	Lens Retention	Unknown
https://www.accessdata.fda.gov/scripts/cdrh/cfdocs/cfMAUDE/Detail.CFM?MDRFOI__ID=17454729&pc=QCB	2023826-2023-03241	NA	Injury	STAAR SURGICAL COMPANY	2023-08-03 04:00:00	QCB	IMPLANTABLE COLLAMER LENS (ICL)	Inadequacy of Device Shape and/or Size	Intraocular Pressure Increased; Eye Pain	P030016	NA	1	Event Description: THE REPORTER INDICATED THAT A 12.6MM VTICM5_12.6 IMPLANTABLE COLLAMER LENS OF -12.00/1.5/094 (SPHERE/CYLINDER/AXIS) WAS IMPLANTED INTO THE PATIENT'S RIGHT EYE (OD) ON (B)(6) 2023. ON (B)(6) 2023 THE LENS WAS REMOVED DUE TO HIGH VAULT CAUSING PAIN AND HIGH PRESSURE. A REPLACEMENT LENS OF SHORTER LENGTH WAS LATER IMPLANTED ON THE SAME DATE AND THE PROBLEM RESOLVED. Manufacturer N…	Lens Exchange	Resolved
https://www.accessdata.fda.gov/scripts/cdrh/cfdocs/cfMAUDE/Detail.CFM?MDRFOI__ID=18271533&pc=QCB	2023826-2023-05502	2023-08-04 04:00:00	Injury	STAAR SURGICAL COMPANY	2023-12-05 05:00:00	QCB	IMPLANTABLE COLLAMER LENS (ICL)	Adverse Event Without Identified Device or Use Problem	Intraocular Pressure Increased; Eye Pain	P030016	NA	1	Event Description: THE REPORTER INDICATED THAT A 12.1MM VTICM5_12.1 IMPLANTABLE COLLAMER LENS OF -11.5/1.0/179 (SPHERE/CYLINDER/AXIS) WAS IMPLANTED INTO THE PATIENT'S RIGHT EYE (OD) ON (B)(6) 2023. ON (B)(6)2023 THE LENS WAS EXPLANTED DUE TO ELEVATED IOP (INTRAOCULAR PRESSURE) ANS PAIN. THE EXPLANT RESOLVED THE PROBLEM. Manufacturer Narrative: H6 - TYPE OF INVESTIGATION - LENS WORK ORDER SEARCH: …	Lens Extraction	Resolved
https://www.accessdata.fda.gov/scripts/cdrh/cfdocs/cfMAUDE/Detail.CFM?MDRFOI__ID=12278375&pc=QCB	2023826-2021-03031	NA	Injury	STAAR SURGICAL COMPANY	2021-08-04 04:00:00	QCB	IMPLANTABLE COLLAMER LENS (ICL)	Inadequacy of Device Shape and/or Size; Patient-Device Incompatibility; Optical Problem	Intraocular Pressure Increased; Halo	NA	NA	1	Event Description: THE REPORTER INDICATED THE SURGEON IMPLANTED A 13.2MM VTICM5_13.2 IMPLANTABLE COLLAMER LENS, -11.00/+3.0/108 (SPHERE/CYLINDER/AXIS), INTO THE PATIENTS LEFT EYE (OS) ON (B)(6) 2021. THE LENS WAS REPORTED AS EXCESSIVE VAULTING, ELEVATED INTRAOCULAR PRESSURE (IOP) AND HALOS. THE LENS REMAINED IMPLANTED. THE CAUSE OF THE EVENT WAS OTHER - ICL LENS LENGTH CALCULATION ERROR. Manufact…	Lens Exchange	Resolved
https://www.accessdata.fda.gov/scripts/cdrh/cfdocs/cfMAUDE/Detail.CFM?MDRFOI__ID=15469467&pc=QCB	2023826-2022-03140	2022-05-25 04:00:00	Injury	STAAR SURGICAL COMPANY	2022-09-23 04:00:00	QCB	IMPLANTABLE COLLAMER LENS (ICL)	Adverse Event Without Identified Device or Use Problem	Intraocular Pressure Increased; Iritis	P030016	NA	1	Event Description: THE REPORTER INDICATED THAT A 13.2MM TMICL13.2 IMPLANTABLE COLLAMER LENS OF -16.50/1.5/089 (SPHERE/CYLINDER/AXIS) WAS IMPLANTED INTO THE PATIENT'S EYE. THE LENS WAS EXPLANTED DUE TO IRITIS/IOP ELEVATION. LENS WAS NOT REPLACED. Manufacturer Narrative: WEIGHT: UNK. ETHNICITY: UNK. RACE: UNK. (B)(4). Manufacturer Narrative: H3: DEVICE EVALUATION: THE LENS WAS RETURNED IN LIQUID IN…	Lens Extraction	Unknown
https://www.accessdata.fda.gov/scripts/cdrh/cfdocs/cfMAUDE/Detail.CFM?MDRFOI__ID=15474202&pc=QCB	2023826-2022-03244	NA	Injury	STAAR SURGICAL COMPANY	2022-09-23 04:00:00	QCB	IMPLANTABLE COLLAMER LENS (ICL)	Adverse Event Without Identified Device or Use Problem	Intraocular Pressure Increased; Iritis	P030016	NA	1	Event Description: THE REPORTER INDICATED THAT A 13.2MM TMICL13.2 IMPLANTABLE COLLAMER LENS OF --17.0/2.0/090 (SPHERE/CYLINDER/AXIS) WAS IMPLANTED INTO THE PATIENT'S EYE. THE LENS WAS EXPLANTED DUE TO IRITIS/HIGH IOP. Manufacturer Narrative: H3: DEVICE EVALUATION: LENS WAS RETURNED IN LIQUID IN A SEPIMENT CUP. VISUAL INSPECTION FOUND NO VISIBLE DAMAGE TO THE LENS. CLAIM#: (B)(4). Manufacturer Nar…	Lens Extraction	Unknown
https://www.accessdata.fda.gov/scripts/cdrh/cfdocs/cfMAUDE/Detail.CFM?MDRFOI__ID=16479533&pc=QCB	2023826-2023-00722	2023-01-17 05:00:00	Injury	STAAR SURGICAL COMPANY	2023-03-03 05:00:00	QCB	IMPLANTABLE COLLAMER LENS (ICL)	Patient-Device Incompatibility	Intraocular Pressure Increased; Iritis	P030016	NA	1	Event Description: THE REPORTER INDICATED THAT A 13.2MM VTICM513.2 IMPLANTABLE COLLAMER LENS OF -11.5/3.0/093 (SPHERE/CYLINDER/AXIS) WAS IMPLANTED INTO THE EYE OF A PATIENT WITH PRE-EXISTING GLAUCOMA ON (B)(6) 2022. PIGMENT DISPERSION AND IRITIS WERE OBSERVED. CAUSE OF THE EVENT IS BOTH A UNKNOWN AND A PATIENT RELATED FACTOR. REPORTEDLY THE STATUS OF THE EYE IS, "MOSTLY QUIET" AND "TAPERING PREDN…	Lens Extraction + Secondary Operation	Resolved
https://www.accessdata.fda.gov/scripts/cdrh/cfdocs/cfMAUDE/Detail.CFM?MDRFOI__ID=16585378&pc=QCB	2023826-2023-00994	2023-01-17 05:00:00	Injury	STAAR SURGICAL COMPANY	2023-03-21 04:00:00	QCB	IMPLANTABLE COLLAMER LENS (ICL)	Patient-Device Incompatibility	Intraocular Pressure Increased; Iritis	P030016	NA	1	Event Description: THE REPORTER INDICATED THAT A 13.2MM VTICM513.2 IMPLANTABLE COLLAMER LENS OF -10.50/2.5/094 (SPHERE/CYLINDER/AXIS) WAS IMPLANTED INTO THE EYE OF A PATIENT WITH PRE-EXISTING GLAUCOMA ON (B)(6) 2022. PIGMENT DISPERSION AND IRITIS WERE OBSERVED. CAUSE OF THE EVENT IS BOTH A UNKNOWN AND A PATIENT RELATED FACTOR. REPORTEDLY, THE STATUS OF THE EYE IS, "MOSTLY QUIET" AND "TAPERING PRE…	Lens Extraction + Secondary Operation	Resolved
https://www.accessdata.fda.gov/scripts/cdrh/cfdocs/cfMAUDE/Detail.CFM?MDRFOI__ID=10969886&pc=QCB	2023826-2020-02884	2020-11-13 05:00:00	Injury	STAAR SURGICAL COMPANY	2020-12-08 05:00:00	QCB	IMPLANTABLE COLLAMER LENS (ICL)	Inadequacy of Device Shape and/or Size	Intraocular Pressure Increased; Iritis; Pain; Pupillary Block; Appropriate Clinical Signs, Symptoms, Conditions Term / Code Not Available	P030016	NA	1	Event Description: THE REPORTER INDICATED THE SURGEON IMPLANTED A 12.6MM TMICL12.6 IMPLANTABLE COLLAMER LENS, -06.50/+1.0/018 (SPHERE/CYLINDER/AXIS), IN THE PATIENTS RIGHT EYE (OD) ON (B)(6) 2020. THE LENS WAS EXPLANTED ON (B)(6) 2020 DUE TO EXCESSIVE VAULTING, PUPIL BLOCK WITH ELEVATED INTRAOCULAR PRESSURE. THE PATIENT DEVELOPED AQUEOUS MISDIRECTION AND EXPERIENCED PAIN. THE SURGEON ENLARGED THE…	Lens Extraction + Secondary Operation	Resolved
https://www.accessdata.fda.gov/scripts/cdrh/cfdocs/cfMAUDE/Detail.CFM?MDRFOI__ID=11405559&pc=QCB	2023826-2021-00562	2021-02-10 05:00:00	Injury	STAAR SURGICAL COMPANY	2021-03-03 05:00:00	QCB	IMPLANTABLE COLLAMER LENS (ICL)	Device Dislodged or Dislocated	Intraocular Pressure Increased; No Clinical Signs, Symptoms or Conditions	NA#S-P#NA	NA	1	Event Description: THE REPORTER INDICATED THE SURGEON IMPLANTED A 13.2MM VTICM5_13.2 IMPLANTABLE COLLAMER LENS, -13.00/+1.5/092, (SPHERE/CYLINDER/AXIS) INTO THE PATIENTS LEFT EYE (OS) ON (B)(6) 2020. THE LENS WAS REPORTED AS HAVING LENS ROTATION NOT ASSOCIATED TO A LOW VAULT. THE LENS WAS REPOSITIONED ON (B)(6) 2021 AND THE PROBLEM WAS RESOLVED. THE LENS REMAINED IMPLANTED. THE CAUSE OF THE EVENT…	Lens Repositioning	Resolved
https://www.accessdata.fda.gov/scripts/cdrh/cfdocs/cfMAUDE/Detail.CFM?MDRFOI__ID=12241308&pc=QCB	2023826-2021-02895	NA	Injury	STAAR SURGICAL COMPANY	2021-07-28 04:00:00	QCB	IMPLANTABLE COLLAMER LENS (ICL)	Adverse Event Without Identified Device or Use Problem; No Apparent Adverse Event	Intraocular Pressure Increased; No Clinical Signs, Symptoms or Conditions	P030016	NA	1	Event Description: THE REPORTER INDICATED THE SURGEON IMPLANTED AN ICL IMPLANTABLE COLLAMER LENS, INTO THE PATIENTS LEFT EYE (OS). THE SURGEON PLANS TO EXPLANT AND EXCHANGE THE LENS. ADDITIONAL INFORMATION HAS BEEN REQUESTED BUT NONE HAS BEEN FORTHCOMING. Manufacturer Narrative: ADDITIONAL DATA: B5: THE REPORTER INDICATED THE SURGEON IMPLANTED A 13.2MM TMICL13.2 IMPLANTABLE COLLAMER LENS, -12.00/…	Lens Exchange	Resolved
https://www.accessdata.fda.gov/scripts/cdrh/cfdocs/cfMAUDE/Detail.CFM?MDRFOI__ID=12241986&pc=QCB	2023826-2021-02896	NA	Injury	STAAR SURGICAL COMPANY	2021-07-28 04:00:00	QCB	IMPLANTABLE COLLAMER LENS (ICL)	Adverse Event Without Identified Device or Use Problem; No Apparent Adverse Event	Intraocular Pressure Increased; No Clinical Signs, Symptoms or Conditions	P030016	NA	1	Event Description: THE REPORTER INDICATED THE SURGEON IMPLANTED AN ICL IMPLANTABLE COLLAMER LENS, INTO THE PATIENTS RIGHT EYE (OD). THE SURGEON PLANS TO EXPLANT AND EXCHANGE THE LENS. ADDITIONAL INFORMATION HAS BEEN REQUESTED BUT NONE HAS BEEN FORTHCOMING. Manufacturer Narrative: ADDITIONAL DATA: B5: THE REPORTER INDICATED THE SURGEON IMPLANTED A 13.2MM TMICL13.2 IMPLANTABLE COLLAMER LENS, -11.00…	Lens Exchange	Resolved
https://www.accessdata.fda.gov/scripts/cdrh/cfdocs/cfMAUDE/Detail.CFM?MDRFOI__ID=14161442&pc=QCB	2023826-2022-01084	2022-02-15 05:00:00	Injury	STAAR SURGICAL COMPANY	2022-04-20 04:00:00	QCB	IMPLANTABLE COLLAMER LENS (ICL)	Inadequacy of Device Shape and/or Size	Intraocular Pressure Increased; No Clinical Signs, Symptoms or Conditions	N/A	NA	1	Event Description: THE REPORTER INDICATED THAT THE SURGEON IMPLANTED A 12.6MM VTICMO12.6, -17.5/2.0/046 (SPHERE/CYLINDER/AXIS), IMPLANTABLE COLLAMER LENS INTO THE PATIENT'S LEFT EYE (OS) ON (B)(6) 2022. THE LENS WAS REPLACED WITH A LONGER LENGTH LENS DUE TO LOW VAULT ON (B)(6) 2022. THIS RESOLVED THE PROBLEM. CAUSE OF THE EVENT IS REPORTED AS UNKNOWN. Manufacturer Narrative: CLAIM# (B)(4). Manufa…	Lens Exchange	Resolved
https://www.accessdata.fda.gov/scripts/cdrh/cfdocs/cfMAUDE/Detail.CFM?MDRFOI__ID=15227548&pc=QCB	2023826-2022-02765	2022-07-18 04:00:00	Injury	STAAR SURGICAL COMPANY	2022-08-15 04:00:00	QCB	IMPLANTABLE COLLAMER LENS (ICL)	Inadequacy of Device Shape and/or Size; No Apparent Adverse Event	Intraocular Pressure Increased; No Clinical Signs, Symptoms or Conditions	P030016	NA	1	Event Description: THE REPORTER INDICATED THAT THE SURGEON IMPLANTED AN IMPLANTABLE COLLAMER LENS INTO A PATIENT'S EYE IN (B)(6) 2022. THE SURGEON NOW REPORTS A PLANNED LENS EXCHANGE FOR A SHORTER LENGTH LENS. LENS REMAINS IMPLANTED. ATTEMPTS TO OBTAIN ADDITIONAL INFORMATION HAVE NOT BEEN SUCCESSFUL. IF ADDITIONAL INFORMATION IS RECEIVED A SUPPLEMENTAL MEDWATCH REPORT WILL BE SUBMITTED. Manufactu…	Lens Exchange	Resolved
https://www.accessdata.fda.gov/scripts/cdrh/cfdocs/cfMAUDE/Detail.CFM?MDRFOI__ID=15674217&pc=QCB	2023826-2022-03632	2022-09-07 04:00:00	Injury	STAAR SURGICAL COMPANY	2022-10-26 04:00:00	QCB	IMPLANTABLE COLLAMER LENS (ICL)	Adverse Event Without Identified Device or Use Problem	Intraocular Pressure Increased; No Clinical Signs, Symptoms or Conditions	P030016	NA	1	Event Description: THE REPORTER INDICATED THAT A 12.6MM VTICM12.6 IMPLANTABLE COLLAMER LENS OF -18/3.5/91 (SPHERE/CYLINDER/AXIS) WAS IMPLANTED INTO THE PATIENT'S RIGHT EYE (OD) ON (B)(6) 2022. ON (B)(6) 2022, THE LENS WAS EXPLANTED DUE TO PUPIL BLOCK WITH ELEVATED IOP, ANGLE CLOSURE WITH ELEVATED IOP, UNREACTIVE (FIXED) PUPIL, AND IRIS ATROPHY. CAUSE OF THE EVENT IS THE DEVICE. THE REPORTER STATE…	Lens Extraction	Not_Resolved
https://www.accessdata.fda.gov/scripts/cdrh/cfdocs/cfMAUDE/Detail.CFM?MDRFOI__ID=15763937&pc=QCB	2023826-2022-04065	2022-10-07 04:00:00	Injury	STAAR SURGICAL COMPANY	2022-11-09 05:00:00	QCB	IMPLANTABLE COLLAMER LENS (ICL)	Inadequacy of Device Shape and/or Size	Intraocular Pressure Increased; No Clinical Signs, Symptoms or Conditions	P030016	NA	1	Event Description: THE REPORTER INDICATED THAT THE SURGEON IMPLANTED A 13.2MM VTICMO13.2 IMPLANTABLE COLLAMER LENS OF DIOPTER -8.5/+1.5/090 INTO THE PATIENT'S LEFT EYE (OS) ON (B)(6) 2022. THE LENS WAS EXCHANGED ON (B)(6) 2022 FOR A SHORTER LENGTH LENS DUE TO EXCESSIVE VAULT AND ELEVATED IOP. THIS RESOLVED THE PROBLEM. CAUSE REPORTED AS UNKNOWN. Manufacturer Narrative: CLAIM# (B)(4).	Lens Exchange	Resolved
https://www.accessdata.fda.gov/scripts/cdrh/cfdocs/cfMAUDE/Detail.CFM?MDRFOI__ID=8409310&pc=QCB	2023826-2019-00378	2019-02-13 05:00:00	Injury	STAAR SURGICAL COMPANY	2019-03-11 04:00:00	QCB	IMPLANTABLE COLLAMER LENS (ICL)	Inadequacy of Device Shape and/or Size	Intraocular Pressure Increased; No Code Available	P030016	NA	1	Event Description: THE REPORTER INDICATED THAT THE SURGEON IMPLANTED A 13.2MM TMICL13.2 LENS, -16.0/+3.0/104 (SPHERE/CYLINDER/AXIS) INTO THE PATIENT'S RIGHT (OD) EYE ON (B)(6) 2019. ON (B)(6) 2019 THE LENS WAS EXPLANTED DUE TO EXCESSIVE VAULT, PUPIL BLOCK, ELEVATED IOP, AND ANGLE CLOSURE. THE STATUS OF THE EYE IS "GOOD" AFTER EXPLANT. THE CAUSE OF THE EVENT IS REPORTED AS "SIZING." Manufacturer N…	Lens Extraction	Resolved
https://www.accessdata.fda.gov/scripts/cdrh/cfdocs/cfMAUDE/Detail.CFM?MDRFOI__ID=8475395&pc=QCB	2023826-2019-00520	2019-02-20 05:00:00	Injury	STAAR SURGICAL COMPANY	2019-04-02 04:00:00	QCB	IMPLANTABLE COLLAMER LENS	Inadequacy of Device Shape and/or Size	Intraocular Pressure Increased; No Code Available	P030016	NA	1	Event Description: THE REPORTER INDICATED THAT THE SURGEON IMPLANTED A 13.2MM TMICL13.2 IMPLANTABLE COLLAMER LENS, -8.5/+2.5/103 (SPHERE/CYLINDER/AXIS) INTO THE PATIENT'S LEFT EYE (OS) ON (B)(6) 2019. ON (B)(6) 2019 THE LENS WAS EXCHANGED WITH A SHORTER LENS DUE TO EXCESSIVE VAULT, ELEVATED IOP, PUPIL BLOCK, AND ANGLE CLOSURE. IN ADDITION, THE SURGEON PERFORMED ENLARGEMENT OF THE PI. NO ADDITIONA…	Lens Exchange	Resolved
https://www.accessdata.fda.gov/scripts/cdrh/cfdocs/cfMAUDE/Detail.CFM?MDRFOI__ID=8489348&pc=QCB	2023826-2019-00555	2018-09-06 04:00:00	Injury	STAAR SURGICAL COMPANY	2019-04-05 04:00:00	QCB	IMPLANTABLE COLLAMER LENS (ICL)	Inadequacy of Device Shape and/or Size	Intraocular Pressure Increased; No Code Available	NA	NA	1	Event Description: THE REPORTER INDICATED THAT THE SURGEON IMPLANTED A 13.2MM VTICMO13.2 IMPLANTABLE COLLAMER LENS, -13.5/1.0/101 (SPHERE/CYLINDER/AXIS), IN THE PATIENT'S RIGHT EYE (OD) ON (B)(6) 2018. THE LENS WAS EXPLANTED ON (B)(6) 2018 DUE TO EXCESSIVE VAULTING, ELEVATED INTRAOCULAR PRESSURE AND SIGNIFICANT REDUCTION OF IRIDO-CORNEAL ANGLES. THE LENS WAS EXCHANGED FOR A SHORTER LENS AND THE P…	Lens Exchange	Resolved
https://www.accessdata.fda.gov/scripts/cdrh/cfdocs/cfMAUDE/Detail.CFM?MDRFOI__ID=8501145&pc=QCB	2023826-2019-00505	2019-03-12	Injury	STAAR SURGICAL COMPANY	2019-04-10	QCB	IMPLANTABLE COLLAMER LENS (ICL)	Off-Label Use; Device Dislodged or Dislocated	Intraocular Pressure Increased; No Code Available	P030016	NA	1	Event Description: THE REPORTER INDICATED THAT A 13.2MM, TMICL13.2, -10.00/2.0/066 (SPHERE/CYLINDER/AXIS), IMPLANTABLE COLLAMER LENS WAS IMPLANTED INTO THE PATIENT'S LEFT EYE (OS) ON (B)(6) 2019. ELEVATED IOP (35MMHG) WITHOUT PUPIL BLOCK AND ANGEL CLOSURE AND LENS ROTATION NOT ASSOCIATED TO A LOW VAULT WAS OBSERVED, THE LENS WAS REPOSITIONED ON (B)(6) 2019 AND THE PROBLEM WAS RESOLVED. CAUSE OF T…	Lens Repositioning	Resolved
https://www.accessdata.fda.gov/scripts/cdrh/cfdocs/cfMAUDE/Detail.CFM?MDRFOI__ID=8501252&pc=QCB	2023826-2019-00506	2019-03-12	Injury	STAAR SURGICAL COMPANY	2019-04-10	QCB	IMPLANTABLE COLLAMER LENS (ICL)	Device Dislodged or Dislocated	Intraocular Pressure Increased; No Code Available	P030016	NA	1	Event Description: THE REPORTER INDICATED THAT A 13.2MM, TMICL13.2, -13.00/1.0/112 (SPHERE/CYLINDER/AXIS), IMPLANTABLE COLLAMER LENS WAS IMPLANTED INTO THE PATIENT'S RIGHT EYE (OD) ON (B)(6) 2019. ELEVATED IOP (26MMHG) WITHOUT PUPIL BLOCK AND ANGEL CLOSURE AND LENS ROTATION NOT ASSOCIATED TO A LOW VAULT WAS OBSERVED, THE LENS WAS REPOSITIONED ON (B)(6) 2019 AND THE PROBLEM WAS RESOLVED. CAUSE OF …	Lens Repositioning	Resolved
https://www.accessdata.fda.gov/scripts/cdrh/cfdocs/cfMAUDE/Detail.CFM?MDRFOI__ID=8511516&pc=QCB	2023826-2019-00597	2019-03-14	Injury	STAAR SURGICAL COMPANY	2019-04-12	QCB	IMPLANTABLE COLLAMER LENS (ICL)	Inadequacy of Device Shape and/or Size	Intraocular Pressure Increased; No Code Available	P030016	NA	1	Event Description: THE REPORTER INDICATED THE SURGEON IMPLANTED A 13.7MM TMICL13.7 IMPLANTABLE COLLAMER LENS, - 6.0/+4.0/096 (SPHERE/CYLINDER/AXIS), IN THE PATIENT'S RIGHT EYE (OD) ON (B)(6) 2019. THE LENS WAS EXPLANTED ON (B)(6) 2019 DUE TO PUPIL BLOCK, WITH ELEVATED INTRAOCULAR PRESSURE (IOP), ANGLE CLOSURE AND SIGNIFICANT REDUCTION OF IRIDO-CORNEAL ANGLES. PRIOR TO EXPLANT, GAVE THE PATIENT DI…	Lens Extraction	Unknown
https://www.accessdata.fda.gov/scripts/cdrh/cfdocs/cfMAUDE/Detail.CFM?MDRFOI__ID=8519014&pc=QCB	2023826-2019-00610	2019-03-15 04:00:00	Injury	STAAR SURGICAL COMPANY	2019-04-16 04:00:00	QCB	IMPLANTABLE COLLAMER LENS	Inadequacy of Device Shape and/or Size	Intraocular Pressure Increased; No Code Available	P030016	NA	1	Event Description: THE REPORTER INDICATED THAT THE SURGEON IMPLANTED A 13.2MM TMICL13.2 IMPLANTABLE COLLAMER LENS, -8.5/+4.0/078 (SPHERE/CYLINDER/AXIS) INTO THE PATIENT'S RIGHT EYE (OD) ON (B)(6) 2019. ON (B)(6) 2019 THE LENS WAS EXCHANGED WITH A SHORTER LENS DUE TO EXCESSIVE VAULT. IN ADDITION, THE SURGEON PERFORMED ENLARGEMENT OF THE PI. THE PROBLEM WAS RESOLVED. THE SURGEON NOTES "EXCHANGE WIT…	Lens Exchange + Secondary Operation	Resolved
https://www.accessdata.fda.gov/scripts/cdrh/cfdocs/cfMAUDE/Detail.CFM?MDRFOI__ID=8620926&pc=QCB	2023826-2019-00871	2019-03-27 04:00:00	Injury	STAAR SURGICAL COMPANY	2019-05-17 04:00:00	QCB	IMPLANTABLE COLLAMER LENS (ICL)	Adverse Event Without Identified Device or Use Problem; No Apparent Adverse Event	Intraocular Pressure Increased; No Code Available	N/A	NA	1	Event Description: THE REPORTER INDICATED THAT THE SURGEON IMPLANTED A 13.2 MM, VTICM5_13.2, -7.00/1.5/095 (SPHERE/CYLINDER/AXIS), IMPLANTABLE COLLAMER LENS INTO THE PATIENT'S LEFT EYE (OS) ON (B)(6) 2019. ON (B)(6) 2019 THE LENS WAS EXPLANTED DUE TO OBSERVATION OF ELEVATED IOP (INTRAOCULAR PRESSURE) AND SIGNIFICANT REDUCTION OF IRIDO-CORNEAL ANGLES. THIS EXPLANT RESOLVED THE PROBLEM. THE SURGEON…	Lens Extraction	Resolved
https://www.accessdata.fda.gov/scripts/cdrh/cfdocs/cfMAUDE/Detail.CFM?MDRFOI__ID=8621026&pc=QCB	2023826-2019-00872	2019-03-27 04:00:00	Injury	STAAR SURGICAL COMPANY	2019-05-17 04:00:00	QCB	IMPLANTABLE COLLAMER LENS (ICL)	Adverse Event Without Identified Device or Use Problem; No Apparent Adverse Event	Intraocular Pressure Increased; No Code Available	N/A	NA	1	Event Description: THE REPORTER INDICATED THAT THE SURGEON IMPLANTED A 13.2 MM, VTICM5_13.2, -7.50/1.5/089 (SPHERE/CYLINDER/AXIS), IMPLANTABLE COLLAMER LENS INTO THE PATIENT'S RIGHT EYE (OD) ON 27 (B)(6) 2019. ON (B)(6) 2019 THE LENS WAS EXPLANTED DUE TO OBSERVATION OF ELEVATED IOP (INTRAOCULAR PRESSURE) AND SIGNIFICANT REDUCTION OF IRIDO-CORNEAL ANGLES. THIS EXPLANT RESOLVED THE PROBLEM. THE SUR…	Lens Extraction	Resolved
https://www.accessdata.fda.gov/scripts/cdrh/cfdocs/cfMAUDE/Detail.CFM?MDRFOI__ID=8633170&pc=QCB	2023826-2019-00886	2019-04-15 04:00:00	Injury	STAAR SURGICAL COMPANY	2019-05-22 04:00:00	QCB	IMPLANTABLE COLLAMER LENS	Device Dislodged or Dislocated	Intraocular Pressure Increased; No Code Available	N/A	NA	1	Event Description: THE REPORTER STATED THAT THE SURGEON IMPLANTED A 12.1MM VTICMO12.1, -15.0/+1.0/004 (SPHERE/CYLINDER/AXIS) INTO THE PATIENT'S LEFT EYE (OS) ON (B)(6) 2019. ON (B)(6) 2019 THE LENS WAS EXCHANGED WITH A LONGER LENS DUE TO LENS ROTATION, ELEVATED IOP, AND LENS DISLOCATION/SUBLUXATION INFERIORLY. THE CAUSE OF THE EVENT IS REPORTED AS A PATIENT-RELATED FACTOR. THE REPORTER STATES, "L…	Lens Exchange	Unknown
https://www.accessdata.fda.gov/scripts/cdrh/cfdocs/cfMAUDE/Detail.CFM?MDRFOI__ID=8634346&pc=QCB	2023826-2019-00804	2019-04-09 04:00:00	Injury	STAAR SURGICAL COMPANY	2019-05-22 04:00:00	QCB	IMPLANTABLE COLLAMER LENS (ICL)	Inadequacy of Device Shape and/or Size	Intraocular Pressure Increased; No Code Available	NA	NA	1	Event Description: THE REPORTER INDICATED THE SURGEON INSERTED AND REMOVED A 12.6MM VTICM5_12.6 IMPLANTABLE COLLAMER LENS, -13.00/+3.0/177 (SPHERE/CYLINDER/AXIS), FROM THE PATIENTS RIGHT EYE (OD) DURING THE SAME SURGERY. THE LENS WAS REMOVED DUE TO EXCESSIVE VAULTING, PUPIL BLOCK, WITH ELEVATED INTRAOCULAR PRESSURE (IOP), UNREACITVE (FIXED) PUPIL AND IRIS ATROPHY. THE LENS WAS NOT EXCHANGED FOR A…	Lens Extraction	Unknown
https://www.accessdata.fda.gov/scripts/cdrh/cfdocs/cfMAUDE/Detail.CFM?MDRFOI__ID=8652099&pc=QCB	2023826-2019-00933	2019-03-20 04:00:00	Injury	STAAR SURGICAL COMPANY	2019-05-29 04:00:00	QCB	IMPLANTABLE COLLAMER LENS (ICL)	Inadequacy of Device Shape and/or Size	Intraocular Pressure Increased; No Code Available	N/A	NA	1	Event Description: THE REPORTER INDICATED THAT THE SURGEON IMPLANTED A 13.2MM VTICM5_13.2 IMPLANTABLE COLLAMER LENS, -11.0/+1.0/087 (SPHERE/CYLINDER/AXIS) INTO THE PATIENT'S LEFT EYE (OS) ON (B)(6)2019. ON (B)(6) 2019 THE LENS WAS EXCHANGED WITH A SHORTER LENS DUE TO EXCESSIVE VAULT AND ELEVATED IOP. THE PROBLEM WAS RESOLVED. THE CAUSE OF THE EVENT IS REPORTED AS A PATIENT-RELATED FACTOR. Manufac…	Lens Exchange	Resolved
https://www.accessdata.fda.gov/scripts/cdrh/cfdocs/cfMAUDE/Detail.CFM?MDRFOI__ID=8731290&pc=QCB	2023826-2019-01084	2019-05-24 04:00:00	Injury	STAAR SURGICAL COMPANY	2019-06-25 04:00:00	QCB	IMPLANTABLE COLLAMER LENS (ICL)	Inadequacy of Device Shape and/or Size; Device Dislodged or Dislocated	Intraocular Pressure Increased; No Code Available	N/A	NA	1	Event Description: THE REPORTER INDICATED THAT THE SURGEON IMPLANTED A 13.7MM VTICM5_13.7, -9.50/4.0/082 (SPHERE/CYLINDER/AXIS), IMPLANTABLE COLLAMER LENS INTO THE PATIENT'S RIGHT EYE (OD). THE SURGEON OBSERVED EXCESSIVE VAULT THE NEXT DAY FOLLOWING SURGERY, LOSS OF BCVA, SIGNIFICANT REDUCTION OF IRIDO-CORNEAL ANGLES, AND ELEVATED IOP (31 MMHG) WITHOUT PUPIL BLOCK AND ANGLE CLOSURE WERE ASSESSED …	Lens Exchange	Resolved
https://www.accessdata.fda.gov/scripts/cdrh/cfdocs/cfMAUDE/Detail.CFM?MDRFOI__ID=8731314&pc=QCB	2023826-2019-01101	NA	Injury	STAAR SURGICAL COMPANY	2019-06-25 04:00:00	QCB	IMPLANTABLE COLLAMER LENS (ICL)	Misfocusing; Inadequacy of Device Shape and/or Size; Device Dislodged or Dislocated	Intraocular Pressure Increased; No Code Available	N/A	NA	1	Event Description: THE REPORTER INDICATED THAT THE SURGEON IMPLANTED A 13.2MM VTICM5_13.2, -9.00/4.5/081 (SPHERE/CYLINDER/AXIS), IMPLANTABLE COLLAMER LENS INTO THE PATIENT'S LEFT EYE (OS). THE SURGEON OBSERVED EXCESSIVE VAULT THE NEXT DAY FOLLOWING SURGERY, LOSS OF BCVA AND ELEVATED IOP (31 MMHG) WITHOUT PUPIL BLOCK AND ANGLE CLOSURE WERE ASSESSED ON (B)(6) 2019. THE LENS REMAINS IMPLANTED. ADDIT…	Lens Exchange	Resolved
https://www.accessdata.fda.gov/scripts/cdrh/cfdocs/cfMAUDE/Detail.CFM?MDRFOI__ID=8736583&pc=QCB	2023826-2019-01126	2019-05-14 04:00:00	Injury	STAAR SURGICAL COMPANY	2019-06-26 04:00:00	QCB	IMPLANTABLE COLLAMER LENS (ICL)	Inadequacy of Device Shape and/or Size	Intraocular Pressure Increased; No Code Available	NA	NA	1	Event Description: THE REPORTER INDICATED THAT THE SURGEON IMPLANTED A 13.2MM VTICMO13.2 IMPLANTABLE COLLAMER LENS, -13.0/+3.0/083 (SPHERE/CYLINDER/AXIS), INTO THE PATIENT'S LEFT EYE (OS) ON (B)(6) 2019. ON (B)(6) 2019 THE LENS WAS REMOVED DUE TO EXCESSIVE VAULT, PUPIL BLOCK, AND ELEVATED IOP. A SHORTER LENS WAS IMPLANTED AND THE PROBLEM WAS RESOLVED. THE CAUSE OF THE EVENT IS REPORTED AS UNKNOWN…	Lens Exchange	Resolved
https://www.accessdata.fda.gov/scripts/cdrh/cfdocs/cfMAUDE/Detail.CFM?MDRFOI__ID=8809460&pc=QCB	2023826-2019-01259	2019-05-16 04:00:00	Injury	STAAR SURGICAL COMPANY	2019-07-19 04:00:00	QCB	IMPLANTABLE COLLAMER LENS (ICL)	Adverse Event Without Identified Device or Use Problem	Intraocular Pressure Increased; No Code Available	NA	NA	1	Event Description: THE REPORTER INDICATED THE SURGEON IMPLANTED A 13.2 MM VTICMO13.2 IMPLANTABLE COLLAMER LENS, -15.5/+2.5/109 (SPHERE/CYLINDER/AXIS), IN THE PATIENTS RIGHT EYE (OD), ON (B)(6) 2019. THE LENS WAS EXPLANTED ON (B)(6) 2019 DUE TO ELEVATED INTRAOCULAR PRESSURE. ANOTHER LENS WAS NOT IMPLANTED. THE CAUSE OF THE EVENT WAS UNKNOWN. THE PATIENTS CONDITION AT LAST VISIT WAS THE PUPIL WAS B…	Lens Extraction	Unknown
https://www.accessdata.fda.gov/scripts/cdrh/cfdocs/cfMAUDE/Detail.CFM?MDRFOI__ID=8889701&pc=QCB	2023826-2019-01418	2019-07-18 04:00:00	Injury	STAAR SURGICAL COMPANY	2019-08-13 04:00:00	QCB	IMPLANTABLE COLLAMER LENS (ICL)	Inadequacy of Device Shape and/or Size	Intraocular Pressure Increased; No Code Available	P030016	NA	1	Event Description: THE REPORTER INDICATED THAT A 12.6MM, TMICL12.6, -14.00/4.0/118 (SPHERE/CYLINDER/AXIS), IMPLANTABLE COLLAMER LENS WAS IMPLANTED INTO THE PATIENT'S RIGHT EYE (OD) ON (B)(6) 2019. PUPIL BLOCK, ANGLE CLOSURE WITH ELEVATED IOP (40 MMHG), AND EXCESSIVE VAULT WERE OBSERVED. ON (B)(6) 2019 THE LENS WAS REMOVED AND EXCHANGED WITH A SMALLER LENGTH LENS. REPORTER NOTED "VAULT IS STILL GE…	Lens Exchange	Resolved
https://www.accessdata.fda.gov/scripts/cdrh/cfdocs/cfMAUDE/Detail.CFM?MDRFOI__ID=8889704&pc=QCB	2023826-2019-01419	2019-07-18 04:00:00	Injury	STAAR SURGICAL COMPANY	2019-08-13 04:00:00	QCB	IMPLANTABLE COLLAMER LENS (ICL)	Inadequacy of Device Shape and/or Size	Intraocular Pressure Increased; No Code Available	P030016	NA	1	Event Description: THE REPORTER INDICATED THAT A 12.6MM, TMICL12.6, -13.50/4.0/090 (SPHERE/CYLINDER/AXIS), IMPLANTABLE COLLAMER LENS WAS IMPLANTED INTO THE PATIENT'S LEFT EYE (OS) ON (B)(6) 2019. PUPIL BLOCK, ANGLE CLOSURE WITH ELEVATED IOP (50 MMHG), AND EXCESSIVE VAULT WERE OBSERVED. ON (B)(6) 2019 THE LENS WAS REMOVED AND EXCHANGED WITH A SMALLER LENGTH LENS. REPORTER NOTED "VAULT IS STILL GEN…	Lens Exchange	Resolved
https://www.accessdata.fda.gov/scripts/cdrh/cfdocs/cfMAUDE/Detail.CFM?MDRFOI__ID=8894304&pc=QCB	2023826-2019-01441	2019-07-12 04:00:00	Injury	STAAR SURGICAL COMPANY	2019-08-14 04:00:00	QCB	IMPLANTABLE COLLAMER LENS (ICL)	Inadequacy of Device Shape and/or Size	Intraocular Pressure Increased; No Code Available	NA	NA	1	Event Description: THE REPORTER INDICATED THAT THE SURGEON IMPLANTED A 13.2MM VTICM5_13.2 IMPLANTABLE COLLAMER LENS, -9.0/+1.0/089 (SPHERE/CYLINDER/AXIS), INTO THE PATIENT'S LEFT EYE (OS) ON (B)(6) 2019. ON (B)(6) 2019 THE LENS WAS EXPLANTED DUE TO EXCESSIVE VAULT AND ELEVATED IOP. ON (B)(6) 2019 A SHORTER LENS WAS IMPLANTED AND THE PROBLEM IS RESOLVED. Manufacturer Narrative: DEVICE EVALUATION: …	Lens Exchange	Resolved
https://www.accessdata.fda.gov/scripts/cdrh/cfdocs/cfMAUDE/Detail.CFM?MDRFOI__ID=8918840&pc=QCB	2023826-2019-01497	2019-07-16 04:00:00	Injury	STAAR SURGICAL COMPANY	2019-08-21 04:00:00	QCB	IMPLANTABLE COLLAMER LENS (ICL)	Inadequacy of Device Shape and/or Size	Intraocular Pressure Increased; No Code Available	NA	NA	1	Event Description: THE REPORTER INDICATED THE SURGEON IMPLANTED A 13.2MM VTICMO13.2 IMPLANTABLE COLLAMER LENS, -15.0/+2.5/106 (SPHERE/CYLINDER/AXIS), IN THE PATIENTS LEFT EYE (OS) ON (B)(6) 2019. THE LENS WAS EXPLANTED ON (B)(6) 2019 DUE TO EXCESSIVE VAULTING AND ELEVATED INTRAOCULAR PRESSURE (IOP). THE LENS WAS EXCHANGED FOR A SHORTER LENS AND THE PROBLEM WAS RESOLVED. Manufacturer Narrative: DE…	Lens Exchange	Resolved
https://www.accessdata.fda.gov/scripts/cdrh/cfdocs/cfMAUDE/Detail.CFM?MDRFOI__ID=8998364&pc=QCB	2023826-2019-01665	2019-07-01 04:00:00	Injury	STAAR SURGICAL COMPANY	2019-09-11 04:00:00	QCB	IMPLANTABLE COLLAMER LENS (ICL)	Off-Label Use; Adverse Event Without Identified Device or Use Problem	Intraocular Pressure Increased; No Code Available	N/A	NA	1	Event Description: THE REPORTER INDICATED THAT LENS A 12.6MM, VTICM5_12.6, -13.00/+2.00/78 (SPHERE/CYLINDER/AXIS), IMPLANTABLE COLLAMER LENS WAS IMPLANTED INTO THE PATIENTS RIGHT EYE (OD) ON (B)(6) 2019 AS A REPLACEMENT LENS BUT IT DID NOT RESOLVE THE PROBLEM. ON (B)(6) 2019 THE LENS WAS EXPLANTED DUE TO ELEVATED IOP (INTRAOCULAR PRESSURE). IT WAS REPORTED THAT AFTER EXPLANTING THE LENS THE PROBL…	Lens Extraction	Resolved
https://www.accessdata.fda.gov/scripts/cdrh/cfdocs/cfMAUDE/Detail.CFM?MDRFOI__ID=9070787&pc=QCB	2023826-2019-01707	2019-07-28 04:00:00	Injury	STAAR SURGICAL COMPANY	2019-09-16 04:00:00	QCB	IMPLANTABLE COLLAMER LENS (ICL)	Inadequacy of Device Shape and/or Size	Intraocular Pressure Increased; No Code Available	N/A	NA	1	Event Description: THE REPORTER INDICATED THAT THE SURGEON IMPLANTED A 13.2MM VTICMO13.2, -15.00/1.0/091 SPHERE/CYLINDER/AXIS), IMPLANTABLE COLLAMER LENS INTO THE PATIENT'S RIGHT EYE (OD) ON (B)(6) 2019. THE LENS WAS REMOVED AND REPLACED ON (B)(6) 2019 FOR A SHORTER LENGTH LENS DUE TO EXCESSIVE VAULT. THIS RESOLVED THE PROBLEM. Manufacturer Narrative: EVENT DESCRIPTION: INITIAL MDR SHOULD HAVE ST…	Lens Exchange	Resolved
https://www.accessdata.fda.gov/scripts/cdrh/cfdocs/cfMAUDE/Detail.CFM?MDRFOI__ID=9120432&pc=QCB	2023826-2019-01735	2019-08-29 04:00:00	Injury	STAAR SURGICAL COMPANY	2019-09-25 04:00:00	QCB	IMPLANTABLE COLLAMER LENS (ICL)	Adverse Event Without Identified Device or Use Problem	Intraocular Pressure Increased; No Code Available	P030016	NA	1	Event Description: THE REPORTER INDICATED THAT THE SURGEON IMPLANTED A 12.6MM TMICL12.6 LENS, -13.5/+2.5/127 (SPHERE/CYLINDER/AXIS) INTO THE PATIENT'S RIGHT (OD) EYE ON (B)(6) 2019. ON (B)(6) 2019 THE LENS WAS EXPLANTED DUE TO ELEVATED IOP. THE PROBLEM WAS RESOLVED WITH EXPLANT, NO REPLACEMENT LENS IMPLANTED. Manufacturer Narrative: DEVICE EVALUATION: THE LENS WAS RETURNED IN A SPECIMEN CUP. VISU…	Lens Extraction	Resolved
https://www.accessdata.fda.gov/scripts/cdrh/cfdocs/cfMAUDE/Detail.CFM?MDRFOI__ID=9120434&pc=QCB	2023826-2019-01736	2019-08-29 04:00:00	Injury	STAAR SURGICAL COMPANY	2019-09-25 04:00:00	QCB	IMPLANTABLE COLLAMER LENS (ICL)	Adverse Event Without Identified Device or Use Problem	Intraocular Pressure Increased; No Code Available	P030016	NA	1	Event Description: THE REPORTER INDICATED THAT THE SURGEON IMPLANTED A 12.6MM TMICL12.6 LENS, -13.5/+1.5/068 (SPHERE/CYLINDER/AXIS) INTO THE PATIENT'S LEFT (OS) EYE ON (B)(6) 2019. ON (B)(6) 2019 THE LENS WAS EXPLANTED DUE TO ELEVATED IOP. THE PROBLEM WAS RESOLVED WITH EXPLANT, NO REPLACEMENT LENS IMPLANTED. Manufacturer Narrative: DEVICE EVALUATED BY MFR: THE LENS WAS RETURNED IN A SPECIMEN CUP.…	Lens Extraction	Resolved
https://www.accessdata.fda.gov/scripts/cdrh/cfdocs/cfMAUDE/Detail.CFM?MDRFOI__ID=9194673&pc=QCB	2023826-2019-01927	2019-07-30	Injury	STAAR SURGICAL COMPANY	2019-10-15	QCB	IMPLANTABLE COLLAMER LENS (ICL)	Inadequacy of Device Shape and/or Size	Intraocular Pressure Increased; No Code Available	NA	NA	1	Event Description: THE REPORTER INDICATED THE SURGEON IMPLANTED A 13.7MM VTICM5_13.7 IMPLANTABLE COLLAMER LENS, -12.5/+2.5/093 (SPHERE/CYLINDER/AXIS), IN THE PATIENT'S RIGHT EYE (OD), ON (B)(6) 2019. THE LENS WAS EXPLANTED ON (B)(6) 2019 DUE TO EXCESSIVE VAULTING AND ELEVATED INTRAOCULAR PRESSURE (IOP). ANOTHER ICL LENS WAS NOT IMPLANTED. THE LENS WAS DISCARDED. Manufacturer Narrative: WEIGHT: UN…	Lens Extraction	Resolved
https://www.accessdata.fda.gov/scripts/cdrh/cfdocs/cfMAUDE/Detail.CFM?MDRFOI__ID=9202984&pc=QCB	2023826-2019-01911	2019-08-02 04:00:00	Injury	STAAR SURGICAL COMPANY	2019-10-17 04:00:00	QCB	IMPLANTABLE COLLAMER LENS (ICL)	Inadequacy of Device Shape and/or Size	Intraocular Pressure Increased; No Code Available	NA	NA	1	Event Description: THE REPORTER INDICATED THAT THE SURGEON IMPLANTED A12.6MM VTICM5_12.6 IMPLANTABLE COLLAMER LENS, -12.50/5.0/081 (SPHERE/CYLINDER/AXIS), INTO THE PATIENT'S LEFT EYE (OS) ON (B)(6)2019. ON (B)(6) 2019 THE LENS WAS EXPLANTED DUE TO EXCESSIVE VAULT AND ELEVATED IOP WITHOUT PUPIL BLOCK AND ANGLE CLOSURE. THE PROBLEM WAS RESOLVED. THE CAUSE WAS REPORTED AS PATIENT RELATED FACTOR AND …	Lens Extraction	Resolved
https://www.accessdata.fda.gov/scripts/cdrh/cfdocs/cfMAUDE/Detail.CFM?MDRFOI__ID=9216530&pc=QCB	2023826-2019-01987	2019-05-07 04:00:00	Injury	STAAR SURGICAL COMPANY	2019-10-21 04:00:00	QCB	IMPLANTABLE COLLAMER LENS (ICL)	Inadequacy of Device Shape and/or Size	Intraocular Pressure Increased; No Code Available	N/A	NA	1	Event Description: THE REPORTER INDICATED THAT THE SURGEON IMPLANTED A 13.2MM, VTICMO 13.2, -8.5/1.5/069 (SPHERE/CYLINDER/AXIS), IMPLANTABLE COLLAMER LENS INTO THE PATIENT'S LEFT EYE (OS) ON (B)(6) 2019. ON (B)(6) 2019 THE LENS WAS EXCHANGED FOR A SHORTER LENGTH LENS DUE TO EXCESSIVE VAULT, ELEVATED INTRAOCULAR PRESSURE, AND SIGNIFICANT REDUCTION OF IRIDO CORNEAL ANGLES. THIS EXCHANGE RESOLVED TH…	Lens Exchange	Resolved
https://www.accessdata.fda.gov/scripts/cdrh/cfdocs/cfMAUDE/Detail.CFM?MDRFOI__ID=9279655&pc=QCB	2023826-2019-02069	2019-05-09 04:00:00	Injury	STAAR SURGICAL COMPANY	2019-11-05 05:00:00	QCB	IMPLANTABLE COLLAMER LENS (ICL)	Inadequacy of Device Shape and/or Size	Intraocular Pressure Increased; No Code Available	NA	NA	1	Event Description: THE REPORTER INDICATED THAT THE SURGEON IMPLANTED A 13.2 MM VTICMO13.2 IMPLANTABLE COLLAMER LENS, -11.5/+1.0/100 (SPHERE/CYLINDER/AXIS), INTO THE PATIENT'S RIGHT EYE (OD) ON (B)(6) 2019. ON (B)(6) 2019 THE LENS WAS EXCHANGED WITH A SHORTER LENS DUE TO EXCESSIVE VAULT AND ELEVATED IOP. THE PROBLEM WAS RESOLVED. THE CAUSE OF THE EVENT IS REPORTED AS UNKNOWN. Manufacturer Narrativ…	Lens Exchange	Resolved
https://www.accessdata.fda.gov/scripts/cdrh/cfdocs/cfMAUDE/Detail.CFM?MDRFOI__ID=9292244&pc=QCB	2023826-2019-02051	2019-05-20 04:00:00	Injury	STAAR SURGICAL COMPANY	2019-11-07 05:00:00	QCB	IMPLANTABLE COLLAMER LENS (ICL)	Inadequacy of Device Shape and/or Size	Intraocular Pressure Increased; No Code Available	N/A	NA	1	Event Description: THE REPORTER INDICATED THAT A 13.2MM, VTICMO13.2, -10.50/1.0/090 (SPHERE/CYLINDER/AXIS), IMPLANTABLE COLLAMER LENS WAS IMPLANTED INTO THE PATIENT'S RIGHT EYE (OD) ON (B)(6) 2019. SIGNIFICANT REDUCTION OF ENDOTHELIAL CELL COUNT OR SIGNIFICANT ENDOTHELIAL CELL LOSS AND EXCESSIVE VAULT WAS OBSERVED. ELEVATED IOP (38 MMHG) WAS ASSESSED ON (B)(6) 2019. LENS WAS REMOVED AND EXCHANGED…	Lens Exchange	Resolved
https://www.accessdata.fda.gov/scripts/cdrh/cfdocs/cfMAUDE/Detail.CFM?MDRFOI__ID=9299931&pc=QCB	2023826-2019-02078	2019-09-07	Injury	STAAR SURGICAL COMPANY	2019-11-08	QCB	IMPLANTABLE COLLAMER LENS (ICL)	Inadequacy of Device Shape and/or Size	Intraocular Pressure Increased; No Code Available	NA	NA	1	Event Description: THE REPORTER INDICATED THE SURGEON IMPLANTED A 13.2MM VTICM5_13.2 IMPLANTABLE COLLAMER LENS, -12.50/+1.0/051 (SPHERE/CYLINDER/AXIS) IN THE PATIENTS LEFT EYE (OS) ON (B)(6) 2019. THE LENS WAS EXPLANTED ON (B)(6) 2019 DUE TO EXCESSIVE VAULTING AND ELEVATED INTRAOCULAR PRESSURE (IOP). THE LENS WAS DISCARDED BY THE HOSPITAL AND WILL NOT BE RETURNED. Manufacturer Narrative: WEIGHT: …	Lens Extraction	Unknown
https://www.accessdata.fda.gov/scripts/cdrh/cfdocs/cfMAUDE/Detail.CFM?MDRFOI__ID=9306729&pc=QCB	2023826-2019-02050	2019-02-27 05:00:00	Injury	STAAR SURGICAL COMPANY	2019-11-11 05:00:00	QCB	IMPLANTABLE COLLAMER LENS (ICL)	Off-Label Use; Inadequacy of Device Shape and/or Size	Intraocular Pressure Increased; No Code Available	N/A	NA	1	Event Description: THE REPORTER INDICATED THAT THE SURGEON IMPLANTED A 12.6MM, VTICMO12.6, -14.0/1.5/097 (SPHERE/CYLINDER/AXIS), IMPLANTABLE COLLAMER LENS INTO THE PATIENT'S LEFT EYE (OS) ON (B)(6)2019. ON (B)(6) 2019 THE LENS WAS EXCHANGED FOR A SHORTER LENGTH LENS DUE TO OBSERVATION OF EXCESSIVE VAULT, ELEVATED IOP, AND SIGNIFICANT REDUCTION OF IRIDO-CORNEAL ANGLES. THIS EXCHANGE RESOLVED THE P…	Lens Exchange	Resolved
https://www.accessdata.fda.gov/scripts/cdrh/cfdocs/cfMAUDE/Detail.CFM?MDRFOI__ID=9306739&pc=QCB	2023826-2019-02049	2019-02-27 05:00:00	Injury	STAAR SURGICAL COMPANY	2019-11-11 05:00:00	QCB	IMPLANTABLE COLLAMER LENS (ICL)	Inadequacy of Device Shape and/or Size	Intraocular Pressure Increased; No Code Available	N/A	NA	1	Event Description: THE REPORTER INDICATED THAT THE SURGEON IMPLANTED A 12.6MM, VTICMO12.6, -14.5/1.5/090 (SPHERE/CYLINDER/AXIS), IMPLANTABLE COLLAMER LENS INTO THE PATIENT'S RIGHT EYE (OD) ON (B)(6) 2019. ON (B)(6) 2019 THE LENS WAS EXCHANGED FOR A SHORTER LENGTH LENS DUE TO OBSERVATION OF EXCESSIVE VAULT, ELEVATED IOP, AND SIGNIFICANT REDUCTION OF IRIDO-CORNEAL ANGLES. THIS EXCHANGE RESOLVED THE…	Lens Exchange	Resolved
https://www.accessdata.fda.gov/scripts/cdrh/cfdocs/cfMAUDE/Detail.CFM?MDRFOI__ID=9312711&pc=QCB	2023826-2019-02079	2019-03-12 04:00:00	Injury	STAAR SURGICAL COMPANY	2019-11-12 05:00:00	QCB	IMPLANTABLE COLLAMER LENS (ICL)	Inadequacy of Device Shape and/or Size	Intraocular Pressure Increased; No Code Available	NA	NA	1	Event Description: THE REPORTER INDICATED THE SURGEON IMPLANTED A 13.2MM VTICMO13.2 IMPLANTABLE COLLAMER LENS, -7.0/+1.0/094 (SPHERE/CYLINDER/AXIS), IN THE PATIENTS RIGHT EYE (OD), ON (B)(6) 2019. THE LENS WAS EXPLANTED ON (B)(6) 2019 DUE TO EXCESSIVE VAULTING, ELEVATED INTRAOCULAR PRESSURE AND SIGNIFICANT REDUCTION OF IRIDO-CORNEAL ANGLES. THE LENS WAS EXCHANGED FOR A SHORTER LENS AND THE PROBLE…	Lens Exchange	Resolved
https://www.accessdata.fda.gov/scripts/cdrh/cfdocs/cfMAUDE/Detail.CFM?MDRFOI__ID=9312732&pc=QCB	2023826-2019-02080	2019-02-19 05:00:00	Injury	STAAR SURGICAL COMPANY	2019-11-12 05:00:00	QCB	IMPLANTABLE COLLAMER LENS (ICL)	Inadequacy of Device Shape and/or Size	Intraocular Pressure Increased; No Code Available	NA	NA	1	Event Description: THE REPORTER INDICATED THE SURGEON IMPLANTED A 13.2MM VTICMO13.2 IMPLANTABLE COLLAMER LENS, -6.0/+1.0/084 (SPHERE/CYLINDER/AXIS), IN THE PATIENTS LEFT EYE (OS), ON (B)(6) 2019. THE LENS WAS EXPLANTED ON (B)(6) 2019 DUE TO EXCESSIVE VAULTING AND ELEVATED INTRAOCULAR PRESSURE. THE LENS WAS EXCHANGED FOR A SHORTER LENS AND THE PROBLEM WAS RESOLVED. THE CAUSE OF THE EVENT WAS UNKNO…	Lens Exchange	Resolved
https://www.accessdata.fda.gov/scripts/cdrh/cfdocs/cfMAUDE/Detail.CFM?MDRFOI__ID=9317888&pc=QCB	2023826-2019-02129	2019-06-11 04:00:00	Injury	STAAR SURGICAL COMPANY	2019-11-13 05:00:00	QCB	IMPLANTABLE COLLAMER LENS (ICL)	Inadequacy of Device Shape and/or Size; Patient-Device Incompatibility	Intraocular Pressure Increased; No Code Available	NA	NA	1	Event Description: THE REPORTER INDICATED THAT THE SURGEON IMPLANTED A 12.6MM VTICMO12.6 IMPLANTABLE COLLAMER LENS, -14.5/+1.0/086 (SPHERE/CYLINDER/AXIS), INTO THE PATIENT'S LEFT EYE (OS) ON (B)(6) 2019. ON (B)(6) 2019 THE LENS WAS EXCHANGED WITH A SHORTER LENS DUE TO EXCESSIVE VAULT AND ELEVATED IOP. THE PROBLEM WAS RESOLVED. THE CAUSE OF THE EVENT IS REPORTED AS A PATIENT-RELATED FACTOR. Manufa…	Lens Exchange	Resolved
https://www.accessdata.fda.gov/scripts/cdrh/cfdocs/cfMAUDE/Detail.CFM?MDRFOI__ID=9336755&pc=QCB	2023826-2019-02173	2019-10-18	Injury	STAAR SURGICAL COMPANY	2019-11-18	QCB	IMPLANTABLE COLLAMER LENS (ICL)	Inadequacy of Device Shape and/or Size	Intraocular Pressure Increased; No Code Available	P030016	NA	1	Event Description: THE REPORTER INDICATED THAT THE SURGEON IMPLANTED A 12.6MM TMICL12.6 LENS, -10.0/+3.0/175 (SPHERE/CYLINDER/AXIS) INTO THE PATIENT'S LEFT (OS) EYE ON (B)(6) 2019. ON (B)(6) 2019 THE LENS WAS EXPLANTED DUE TO EXCESSIVE VAULT AND ELEVATED IOP. IOP VALUE WENT FROM 45MMHG TO 15MMHG AFTER EXPLANT. Manufacturer Narrative: THE LENS WAS RETURNED DRY IN A CONTACT LENS CONTAINER. THERE WA…	Lens Extraction	Unknown
https://www.accessdata.fda.gov/scripts/cdrh/cfdocs/cfMAUDE/Detail.CFM?MDRFOI__ID=9336761&pc=QCB	2023826-2019-02172	2019-10-18	Injury	STAAR SURGICAL COMPANY	2019-11-18	QCB	IMPLANTABLE COLLAMER LENS (ICL)	Inadequacy of Device Shape and/or Size	Intraocular Pressure Increased; No Code Available	P030016	NA	1	Event Description: THE REPORTER INDICATED THAT THE SURGEON IMPLANTED A 12.6MM TMICL12.6 LENS, -10.0/+3.0/173 (SPHERE/CYLINDER/AXIS) INTO THE PATIENT'S RIGHT (OD) EYE ON (B)(6) 2019. ON (B)(6) 2019 THE LENS WAS EXPLANTED DUE TO EXCESSIVE VAULT AND ELEVATED IOP. IOP VALUE WENT FROM 59MMHG TO 12MMHG AFTER EXPLANT. Manufacturer Narrative: THE LENS WAS RETURNED DRY IN A CONTACT LENS CONTAINER. THERE W…	Lens Extraction	Unknown
https://www.accessdata.fda.gov/scripts/cdrh/cfdocs/cfMAUDE/Detail.CFM?MDRFOI__ID=9335805&pc=QCB	2023826-2019-02149	2019-09-06 04:00:00	Injury	STAAR SURGICAL COMPANY	2019-11-18 05:00:00	QCB	IMPLANTABLE COLLAMER LENS (ICL)	Inadequacy of Device Shape and/or Size	Intraocular Pressure Increased; No Code Available	P030016	NA	1	Event Description: THE REPORTER INDICATED THAT THE SURGEON IMPLANTED A 13.2MM TMICL13.2, -11.00/1.0/085 (SPHERE/CYLINDER/AXIS) , IMPLANTABLE COLLAMER LENS INTO THE PATIENT'S LEFT EYE (OS) ON (B)(6) 2019. THE LENS WAS REMOVED AND REPLACED ON (B)(6) 2019 FOR A SHORTER LENGTH LENS DUE TO EXCESSIVE VAULT AND ELEVATED IOP (23 MMHG) .THIS RESOLVED THE PROBLEM. AN ENLARGEMTNE OF PI AND YAG WAS PERFORME.…	Lens Exchange + Secondary Operation	Resolved
https://www.accessdata.fda.gov/scripts/cdrh/cfdocs/cfMAUDE/Detail.CFM?MDRFOI__ID=9338940&pc=QCB	2023826-2019-02120	2019-10-15 04:00:00	Injury	STAAR SURGICAL COMPANY	2019-11-18 05:00:00	QCB	IMPLANTABLE COLLAMER LENS (ICL)	Inadequacy of Device Shape and/or Size	Intraocular Pressure Increased; No Code Available	N/A	NA	1	Event Description: THE REPORTER INDICATED THE SURGEON IMPLANTED A 13.2MM VTICMO13.2 IMPLANTABLE COLLAMER LENS, -15.00/+4.0/087 (SPHERE/CYLINDER/AXIS) IN THE PATIENTS LEFT EYE (OS) ON (B)(6) 2019. THE LENS WAS EXPLANTED DUE TO EXCESSIVE VAULTING, ELEVATED INTRAOCULAR PRESSURE (IOP) AND NARROW ANGLES. THE CAUSE OF THE EVENT WAS UNKNOWN. ADDITIONAL INFORMATION HAS BEEN REQUESTED BUT NONE HAS BEEN FO…	Lens Exchange	Resolved
https://www.accessdata.fda.gov/scripts/cdrh/cfdocs/cfMAUDE/Detail.CFM?MDRFOI__ID=9338965&pc=QCB	2023826-2019-02119	2019-10-15 04:00:00	Injury	STAAR SURGICAL COMPANY	2019-11-18 05:00:00	QCB	IMPLANTABLE COLLAMER LENS (ICL)	Inadequacy of Device Shape and/or Size	Intraocular Pressure Increased; No Code Available	N/A	NA	1	Event Description: THE REPORTER INDICATED THE SURGEON IMPLANTED A 13.2MM VTICMO13.2 IMPLANTABLE COLLAMER LENS, -16.50/+3.5/102 (SPHERE/CYLINDER/AXIS) IN THE PATIENT'S RIGHT EYE (OD) ON (B)(6) 2019. THE LENS WAS EXPLANTED DUE TO EXCESSIVE VAULTING, ELEVATED INTRAOCULAR PRESSURE (IOP) AND NARROW ANGLES. THE CAUSE OF THE EVENT WAS UNKNOWN. ADDITIONAL INFORMATION HAS BEEN REQUESTED BUT NONE HAS BEEN …	Lens Exchange	Resolved
https://www.accessdata.fda.gov/scripts/cdrh/cfdocs/cfMAUDE/Detail.CFM?MDRFOI__ID=9498077&pc=QCB	2023826-2019-02407	NA	Injury	STAAR SURGICAL COMPANY	2019-12-19	QCB	IMPLANTABLE COLLAMER LENS (ICL)	Inadequacy of Device Shape and/or Size	Intraocular Pressure Increased; No Code Available	NA	NA	1	Event Description: THE REPORTER INDICATED THE SURGEON IMPLANTED A 13.2MM VTICMO13.2 IMPLANTABLE COLLAMER LENS, -1.5/+6.0/084 (SPHERE/CYLINDER/AXIS) IN THE PATIENTS RIGHT EYE (OD) ON (B)(6) 2019. THE LENS WAS EXPLANTED ON (B)(6) 2019 DUE TO EXCESSIVE VAULTING, PUPIL BLOCK WITH ELEVATED INTRAOCULAR PRESSURE, PIGMENT DISPERSION, IRIS ATROPHY, UNREACTIVE (FIXED) PUPIL AND ANGLE CLOSURE. THE CAUSE OF …	Lens Extraction	Unknown
https://www.accessdata.fda.gov/scripts/cdrh/cfdocs/cfMAUDE/Detail.CFM?MDRFOI__ID=9512598&pc=QCB	2023826-2019-02423	2019-11-26 05:00:00	Injury	STAAR SURGICAL COMPANY	2019-12-23 05:00:00	QCB	IMPLANTABLE COLLAMER LENS (ICL)	Inadequacy of Device Shape and/or Size	Intraocular Pressure Increased; No Code Available	P030016	NA	1	Event Description: THE REPORTER INDICATED THAT THE SURGEON IMPLANTED A 13.2MM TMICL13.2 LENS, -15.5/+2.0/070 (SPHERE/CYLINDER/AXIS) INTO THE PATIENT'S RIGHT (OD) EYE ON (B)(6) 2019. ON (B)(6) 2019 THE LENS WAS EXCHANGED WITH A SHORTER LENS DUE TO EXCESSIVE VAULT, PUPIL BLOCK, AND ELEVATED IOP. IMMEDIATE POSTOP RESULTS WERE GOOD FOLLOWING THE EXCHANGE. PRIOR TO EXCHANGE THE SURGEON HAD PERFORMED A…	Lens Exchange + Secondary Operation	Resolved
https://www.accessdata.fda.gov/scripts/cdrh/cfdocs/cfMAUDE/Detail.CFM?MDRFOI__ID=9512611&pc=QCB	2023826-2019-02422	2019-11-26 05:00:00	Injury	STAAR SURGICAL COMPANY	2019-12-23 05:00:00	QCB	IMPLANTABLE COLLAMER LENS (ICL)	Inadequacy of Device Shape and/or Size	Intraocular Pressure Increased; No Code Available	P030016	NA	1	Event Description: THE REPORTER INDICATED THAT THE SURGEON IMPLANTED A 13.2MM TMICL13.2 LENS, -14.5/+1.5/074 (SPHERE/CYLINDER/AXIS) INTO THE PATIENT'S LEFT (OS) EYE ON (B)(6) 2019. ON (B)(6) 2019 THE LENS WAS EXCHANGED WITH A SHORTER LENS DUE TO EXCESSIVE VAULT, PUPIL BLOCK, AND ELEVATED IOP. IMMEDIATE POSTOP RESULTS WERE GOOD FOLLOWING THE EXCHANGE. PRIOR TO EXCHANGE THE SURGEON HAD PERFORMED A …	Lens Exchange + Secondary Operation	Resolved
https://www.accessdata.fda.gov/scripts/cdrh/cfdocs/cfMAUDE/Detail.CFM?MDRFOI__ID=9516563&pc=QCB	2023826-2019-02448	2019-04-10 04:00:00	Injury	STAAR SURGICAL COMPANY	2019-12-24 05:00:00	QCB	IMPLANTABLE COLLAMER LENS (ICL)	Inadequacy of Device Shape and/or Size	Intraocular Pressure Increased; No Code Available	N/A	NA	1	Event Description: THE REPORTER INDICATED THAT THE SURGEON IMPLANTED A 13.2MM VTICMO13.2, -11.50/1.5/094 (SPHERE/CYLINDER/AXIS), IMPLANTABLE COLLAMER LENS INTO THE PATIENT'S RIGHT EYE (OD) ON (B)(6) 2019. SIGNIFICANT REDUCTION OF IRIDO-CORNEAL ANGELS AND EXCESSIVE VAULT WERE OBSERVED. ELEVATED IOP (50MMHG) WAS ASSESSED ON (B)(6) 2019. THE LENS WAS REMOVED AND REPLACED ON (B)(6) 2019 WITH A SHORTE…	Lens Exchange	Resolved
https://www.accessdata.fda.gov/scripts/cdrh/cfdocs/cfMAUDE/Detail.CFM?MDRFOI__ID=9565909&pc=QCB	2023826-2020-00062	2019-12-11 05:00:00	Injury	STAAR SURGICAL COMPANY	2020-01-08 05:00:00	QCB	IMPLANTABLE COLLAMER LENS (ICL)	Inadequacy of Device Shape and/or Size	Intraocular Pressure Increased; No Code Available	P030016	NA	1	Event Description: THE REPORTER INDICATED THAT A 13.2MM, TMICL13.2, -6.50/-1.50/093 (SPHERE/CYLINDER/AXIS), IMPLANTABLE COLLAMER LENS WAS IMPLANTED INTO THE PATIENTS LEFT EYE (OS) ON (B)(6) 2019. ON (B)(6) 2019 THE LENS WAS EXCHANGED FOR A SHORTER LENGTH LENS DUE TO EXCESSIVE VAULT AND PUPIL BLOCK WITH ELEVATED IOP. THIS EXCHANGE RESOLVED THE PROBLEM. Manufacturer Narrative: CORRECTED DATA: B3- D…	Lens Exchange	Resolved
https://www.accessdata.fda.gov/scripts/cdrh/cfdocs/cfMAUDE/Detail.CFM?MDRFOI__ID=9639933&pc=QCB	2023826-2020-00201	2019-07-26 04:00:00	Injury	STAAR SURGICAL COMPANY	2020-01-28 05:00:00	QCB	IMPLANTABLE COLLAMER LENS (ICL)	Inadequacy of Device Shape and/or Size	Intraocular Pressure Increased; No Code Available	NA	NA	1	Event Description: THE REPORTER INDICATED THE SURGEON IMPLANTED A 13.2MM VTICM5_13.2 IMPLANTABLE COLLAMER LENS, - 14.00/+2.0/092 (SPHERE/CYLINDER/AXIS) IN THE PATIENTS RIGHT EYE (OD), ON (B)(6) 2019. THE LENS WAS EXPLANTED ON (B)(6) 2019 DUE TO EXCESSIVE VAULTING. THE LENS WAS EXCHANGED FOR A SHORTER LENS AND THE PROBLEM WAS RESOLVED. THE EYE IS QUIET. THE SURGEON AND PATIENT ARE HAPPY. Manufactu…	Lens Exchange	Resolved
https://www.accessdata.fda.gov/scripts/cdrh/cfdocs/cfMAUDE/Detail.CFM?MDRFOI__ID=9656163&pc=QCB	2023826-2020-00212	2020-01-08 05:00:00	Injury	STAAR SURGICAL COMPANY	2020-02-01 05:00:00	QCB	IMPLANTABLE COLLAMER LENS (ICL)	Inadequacy of Device Shape and/or Size	Intraocular Pressure Increased; No Code Available	P030016	NA	1	Event Description: THE REPORTER INDICATED THE SURGEON IMPLANTED A 13.2MM TMICL13.2 IMPLANTABLE COLLAMER LENS, - 14.00/+2.0/110 (SPHERE/CYLINDER/AXIS), IN THE PATIENTS RIGHT EYE (OD) ON (B)(6) 2020. THE LENS WAS EXPLANTED ON (B)(6) 2020 DUE TO EXCESSIVE VAULTING AND ELEVATED INTRAOCULAR PRESSURE (IOP). THE LENS WAS EXCHANGED FOR A SHORTER LENS AND THE PROBLEM WAS RESOLVED. THE CAUSE OF THE EVENT W…	Lens Exchange	Resolved
https://www.accessdata.fda.gov/scripts/cdrh/cfdocs/cfMAUDE/Detail.CFM?MDRFOI__ID=9689251&pc=QCB	2023826-2020-00250	2020-01-20 05:00:00	Injury	STAAR SURGICAL COMPANY	2020-02-10 05:00:00	QCB	IMPLANTABLE COLLAMER LENS (ICL)	Inadequacy of Device Shape and/or Size	Intraocular Pressure Increased; No Code Available	N/A	NA	1	Event Description: THE REPORTER INDICATED THAT A 13.2MM, VTICM5_13.2, -9.00/1.0/092 (SPHERE/CYLINDER/AXIS), IMPLANTABLE COLLAMER LENS WAS IMPLANTED INTO THE PATIENT'S LEFT EYE (OS) ON (B)(6) 2019. EXCESSIVE VAULT AND ELEVATED IOP (20 MMHG) WITHOUT PUPIL BLOCK AND ANGLE CLOSURE WERE OBSERVED ON (B)(6) 2020. LENS REMAINS IMPLANTED. CAUSE OF THE EVENT IS REPORTED AS UNKNOWN. ADDITIONAL INFORMATION H…	Lens Exchange	Resolved
https://www.accessdata.fda.gov/scripts/cdrh/cfdocs/cfMAUDE/Detail.CFM?MDRFOI__ID=9690171&pc=QCB	2023826-2020-00278	2019-08-09 04:00:00	Injury	STAAR SURGICAL COMPANY	2020-02-10 05:00:00	QCB	IMPLANTABLE COLLAMER LENS (ICL)	Inadequacy of Device Shape and/or Size	Intraocular Pressure Increased; No Code Available	NA	NA	1	Event Description: THE REPORTER INDICATED THAT THE SURGEON IMPLANTED A 13.2MM VTICM5_13.2 IMPLANTABLE COLLAMER LENS, -3.5/+1.5/093 (SPHERE/CYLINDER/AXIS), INTO THE PATIENT'S LEFT EYE (OS) ON (B)(6) 2019. ON (B)(6) 2019 THE LENS WAS REMOVED DUE TO EXCESSIVE VAULT, ELEVATED IOP, AND SIGNIFICANT REDUCTION OF IRIDO-CORNEAL ANGLES (ICA). AN ADDITION OF A PI-YAG WAS ALSO PERFORMED. ON THE SAME DATE IN …	Lens Exchange	Resolved
https://www.accessdata.fda.gov/scripts/cdrh/cfdocs/cfMAUDE/Detail.CFM?MDRFOI__ID=9781511&pc=QCB	2023826-2020-00296	2019-12-04 05:00:00	Injury	STAAR SURGICAL COMPANY	2020-03-03 05:00:00	QCB	IMPLANTABLE COLLAMER LENS (ICL)	Inadequacy of Device Shape and/or Size	Intraocular Pressure Increased; No Code Available	N/A	NA	1	Event Description: THE REPORTER INDICATED THAT THE SURGEON IMPLANTED A 12.1MM VTICM5_12.1, -9.50/1.0/090 (SPHERE/CYLINDER/AXIS), IMPLANTABLE COLLAMER LENS INTO THE PATIENT'S LEFT EYE (OS) ON (B)(6) 2019. EXCESSIVE VAULT AND ELEVATED IOP (28 MMHG) WITHOUT PUPIL BLOCK AND ANGLE CLOSURE WERE OBSERVED ON (B)(6) 2019. THE LENS WAS REMOVED ON (B)(6) 2019. REPORTEDLY, "THERE ARE NO PLANS TO IMPLANT OTHE…	Lens Extraction	Resolved
https://www.accessdata.fda.gov/scripts/cdrh/cfdocs/cfMAUDE/Detail.CFM?MDRFOI__ID=9781512&pc=QCB	2023826-2020-00297	2019-12-04 05:00:00	Injury	STAAR SURGICAL COMPANY	2020-03-03 05:00:00	QCB	IMPLANTABLE COLLAMER LENS (ICL)	Inadequacy of Device Shape and/or Size	Intraocular Pressure Increased; No Code Available	N/A	NA	1	Event Description: THE REPORTER INDICATED THAT THE SURGEON IMPLANTED A 12.1MM VTICM5_12.1, -10.00/1.0/089 (SPHERE/CYLINDER/AXIS), IMPLANTABLE COLLAMER LENS INTO THE PATIENT'S RIGHT EYE (OD) ON (B)(6) 2019. EXCESSIVE VAULT AND ELEVATED IOP (27 MMHG) WITHOUT PUPIL BLOCK AND ANGLE CLOSURE WERE OBSERVED ON (B)(6) 2019. THE LENS WAS REMOVED ON (B)(6) 2019. REPORTEDLY, "THERE ARE NO PLANS TO IMPLANT OT…	Lens Extraction	Resolved
https://www.accessdata.fda.gov/scripts/cdrh/cfdocs/cfMAUDE/Detail.CFM?MDRFOI__ID=9842477&pc=QCB	2023826-2020-00547	2019-01-23 05:00:00	Injury	STAAR SURGICAL COMPANY	2020-03-17 04:00:00	QCB	IMPLANTABLE COLLAMER LENS (ICL)	Inadequacy of Device Shape and/or Size	Intraocular Pressure Increased; No Code Available	N/A	NA	1	Event Description: THE REPORTER INDICATED THAT A 12.6MM, VTICMO12.6, -15.0/3.5/082 (SPHERE/CYLINDER/AXIS), IMPLANTABLE COLLAMER LENS WAS IMPLANTED INTO THE PATIENTS RIGHT EYE (OD) ON (B)(6) 2019. ON (B)(6) 2019 THE LENS WAS EXPLANTED DUE TO EXCESSIVE VAULT AND ANGLE CLOSURE WITH ELEVATED INTRAOCULAR PRESSURE (IOP). THIS RESOLVED THE PROBLEM, PATIENT CURRENT CONDITION IS GOOD. Manufacturer Narrati…	Lens Extraction	Resolved
https://www.accessdata.fda.gov/scripts/cdrh/cfdocs/cfMAUDE/Detail.CFM?MDRFOI__ID=9842582&pc=QCB	2023826-2020-00548	2019-01-23 05:00:00	Injury	STAAR SURGICAL COMPANY	2020-03-17 04:00:00	QCB	IMPLANTABLE COLLAMER LENS (ICL)	Inadequacy of Device Shape and/or Size	Intraocular Pressure Increased; No Code Available	N/A	NA	1	Event Description: THE REPORTER INDICATED THAT A 12.6MM, VTICMO12.6, -16.5/5.5/086 (SPHERE/CYLINDER/AXIS), IMPLANTABLE COLLAMER LENS WAS IMPLANTED INTO THE PATIENTS LEFT EYE (OS) ON (B)(6) 2019. ON (B)(6) 2019 THE LENS WAS EXPLANTED DUE TO EXCESSIVE VAULT AND SIGNIFICANT REDUCTION OF IRIDO-CORNEAL ANGLES. LENS EXPLANT RESOLVED THE PROBLEM, PATIENT CURRENT CONDITION IS GOOD. Manufacturer Narrative…	Lens Extraction	Resolved
https://www.accessdata.fda.gov/scripts/cdrh/cfdocs/cfMAUDE/Detail.CFM?MDRFOI__ID=9842748&pc=QCB	2023826-2020-00505	NA	Injury	STAAR SURGICAL COMPANY	2020-03-17 04:00:00	QCB	IMPLANTABLE COLLAMER LENS (ICL)	Inadequacy of Device Shape and/or Size	Intraocular Pressure Increased; No Code Available	P030016	NA	1	Event Description: THE REPORTER INDICATED THAT THE SURGEON IMPLANTED A 13.2MM TMICL13.2 LENS, -9.5/+1.5/088 (SPHERE/CYLINDER/AXIS) INTO THE PATIENT'S RIGHT (OD) EYE ON (B)(6) 2020. THE SURGEON REPORTS "SIZE SEEMS TO BE BIG, WITH PERSISTENT ELEVATED IOP REFRACTIVE TO MEDICAL TREATMENT." THE SURGEON PLANS TO INCREASE THE SIZE OF THE PI AND WILL DETERMINE IF AN EXCHANGE IS NEEDED. IT IS UNKNOWN AT T…	Unknown	Unknown
https://www.accessdata.fda.gov/scripts/cdrh/cfdocs/cfMAUDE/Detail.CFM?MDRFOI__ID=9842787&pc=QCB	2023826-2020-00506	NA	Injury	STAAR SURGICAL COMPANY	2020-03-17 04:00:00	QCB	IMPLANTABLE COLLAMER LENS (ICL)	Inadequacy of Device Shape and/or Size	Intraocular Pressure Increased; No Code Available	P030016	NA	1	Event Description: THE REPORTER INDICATED THAT THE SURGEON IMPLANTED A 13.2MM TMICL13.2 LENS, -9.5/+2.5/091 (SPHERE/CYLINDER/AXIS) INTO THE PATIENT'S LEFT (OS) EYE ON (B)(6) 2020. THE SURGEON REPORTS "SIZE SEEMS TO BE BIG, WITH PERSISTENT ELEVATED IOP REFRACTIVE TO MEDICAL TREATMENT." THE SURGEON PLANS TO INCREASE THE SIZE OF THE PI AND WILL DETERMINE IF AN EXCHANGE IS NEEDED. IT IS UNKNOWN AT TH…	Unknown	Unknown
https://www.accessdata.fda.gov/scripts/cdrh/cfdocs/cfMAUDE/Detail.CFM?MDRFOI__ID=9891498&pc=QCB	2023826-2020-00597	2020-03-01 05:00:00	Injury	STAAR SURGICAL COMPANY	2020-03-27 04:00:00	QCB	IMPLANTABLE COLLAMER LENS (ICL)	Inadequacy of Device Shape and/or Size	Intraocular Pressure Increased; No Code Available	P030016	NA	1	Event Description: THE REPORTER INDICATED THAT A 12.6MM, TMICL12.6, -13.50/1.5/089 (SPHERE/CYLINDER/AXIS), IMPLANTABLE COLLAMER LENS WAS IMPLANTED INTO THE PATIENT'S RIGHT EYE (OD) ON (B)(6) 2020. PUPIL BLOCK WITH ELEVATED IOP (GREATER THAN 50MMHG) AND ANGLE CLOSURE WITH ELEVATED IOP (GREATER THAN 50MMHG) WERE ASSESSED ON (B)(6) 2020, AND EXCESSIVE VAULT WAS OBSERVED. ADDITION OF NEW PI AND YAG W…	Lens Exchange + Secondary Operation	Resolved
https://www.accessdata.fda.gov/scripts/cdrh/cfdocs/cfMAUDE/Detail.CFM?MDRFOI__ID=9913332&pc=QCB	2023826-2020-00737	2020-01-14	Injury	STAAR SURGICAL COMPANY	2020-04-01	QCB	IMPLANTABLE COLLAMER LENS (ICL)	Adverse Event Without Identified Device or Use Problem	Intraocular Pressure Increased; No Code Available	NA	NA	1	Event Description: THE REPORTER INDICATED THE SURGEON IMPLANTED A 13.2MM VTICMO13.2 IMPLANTABLE COLLAMER LENS, -15.0/+0.5/152 (SPHERE/CYLINDER/AXIS), IN THE PATIENTS RIGHT EYE (OD), ON (B)(6) 2020. THREE DAYS LATER, ANTERIOR CHAMBER IRRIGATION/EVACUATION OF VISCO/FLUIDS WAS PERFORMED AGAIN. THE LENS WAS EXPLANTED ON (B)(6) 2020 DUE TO ELEVATED INTRAOCULAR PRESSURE (IOP). THE SURGEON IS NOT PLANNI…	Lens Extraction	Unknown
https://www.accessdata.fda.gov/scripts/cdrh/cfdocs/cfMAUDE/Detail.CFM?MDRFOI__ID=9953427&pc=QCB	2023826-2020-00872	2019-04-09 04:00:00	Injury	STAAR SURGICAL COMPANY	2020-04-13 04:00:00	QCB	IMPLANTABLE COLLAMER LENS (ICL)	Off-Label Use; Inadequacy of Device Shape and/or Size	Intraocular Pressure Increased; No Code Available	NA	NA	1	Event Description: THE REPORTER INDICATED THAT A 12.6MM, VTICMO12.6, -13.0/2.0/74 (SPHERE/CYLINDER/AXIS), IMPLANTABLE COLLAMER LENS WAS IMPLANTED INTO THE PATIENTS LEFT EYE (OS) ON (B)(6) 2019. ON (B)(6) 2019 THE LENS WAS EXCHANGED FOR A SHORTER LENGTH LENS DUE TO EXCESSIVE VAULT, ELEVATED IOP (INTRAOCULAR PRESSURE) AND SIGNIFICANT REDUCTION OF IRIDO-CORNEAL ANGLES. THIS EXCHANGE RESOLVED THE PRO…	Lens Exchange	Resolved
https://www.accessdata.fda.gov/scripts/cdrh/cfdocs/cfMAUDE/Detail.CFM?MDRFOI__ID=9953577&pc=QCB	2023826-2020-00874	2018-07-18 04:00:00	Injury	STAAR SURGICAL COMPANY	2020-04-13 04:00:00	QCB	IMPLANTABLE COLLAMER LENS (ICL)	Inadequacy of Device Shape and/or Size	Intraocular Pressure Increased; No Code Available	NA	NA	1	Event Description: THE REPORTER INDICATED THAT A 13.2MM, VTICMO13.2, -16.5/3.0/96 (SPHERE/CYLINDER/AXIS), IMPLANTABLE COLLAMER LENS WAS IMPLANTED INTO THE PATIENTS RIGHT EYE (OD) ON (B)(6) 2018. ON (B)(6) 2018 THE LENS WAS EXCHANGED FOR A SHORTER LENGTH LENS DUE TO EXCESSIVE VAULT, ELEVATED IOP (INTRAOCULAR PRESSURE) AND SIGNIFICANT REDUCTION OF IRIDO-CORNEAL ANGLES. THIS EXCHANGE RESOLVED THE PR…	Lens Exchange	Resolved
https://www.accessdata.fda.gov/scripts/cdrh/cfdocs/cfMAUDE/Detail.CFM?MDRFOI__ID=9953691&pc=QCB	2023826-2020-00875	2018-07-18 04:00:00	Injury	STAAR SURGICAL COMPANY	2020-04-13 04:00:00	QCB	IMPLANTABLE COLLAMER LENS (ICL)	Inadequacy of Device Shape and/or Size	Intraocular Pressure Increased; No Code Available	NA	NA	1	Event Description: THE REPORTER INDICATED THAT A 13.2MM, VTICMO13.2, -17.5/3.5/086 (SPHERE/CYLINDER/AXIS), IMPLANTABLE COLLAMER LENS WAS IMPLANTED INTO THE PATIENTS LEFT EYE (OS) ON (B)(60 2018. ON (B)(6) 2018 THE LENS WAS EXCHANGED FOR A SHORTER LENGTH LENS DUE TO EXCESSIVE VAULT, ELEVATED IOP (INTRAOCULAR PRESSURE) AND SIGNIFICANT REDUCTION OF IRIDO-CORNEAL ANGLES. THIS EXCHANGE RESOLVED THE PR…	Lens Exchange	Resolved
https://www.accessdata.fda.gov/scripts/cdrh/cfdocs/cfMAUDE/Detail.CFM?MDRFOI__ID=9953821&pc=QCB	2023826-2020-00882	2019-10-31 04:00:00	Injury	STAAR SURGICAL COMPANY	2020-04-13 04:00:00	QCB	IMPLANTABLE COLLAMER LENS (ICL)	Off-Label Use; Inadequacy of Device Shape and/or Size	Intraocular Pressure Increased; No Code Available	NA	NA	1	Event Description: THE REPORTER INDICATED THAT A 12.6MM, VTICMO12.6, -13.0/2.0/090 (SPHERE/CYLINDER/AXIS), IMPLANTABLE COLLAMER LENS WAS IMPLANTED INTO THE PATIENTS RIGHT EYE (OD) ON (B)(6) 2019. ON (B)(6) 2019 THE LENS WAS EXCHANGED FOR A SHORTER LENGTH LENS DUE TO EXCESSIVE VAULT AND ELEVATED IOP (INTRAOCULAR PRESSURE). THIS EXCHANGE RESOLVED THE PROBLEM. Manufacturer Narrative: H3 - DEVICE EVA…	Lens Exchange	Resolved
https://www.accessdata.fda.gov/scripts/cdrh/cfdocs/cfMAUDE/Detail.CFM?MDRFOI__ID=9957585&pc=QCB	2023826-2020-00847	2020-03-13 04:00:00	Injury	STAAR SURGICAL COMPANY	2020-04-14 04:00:00	QCB	IMPLANTABLE COLLAMER LENS (ICL)	Inadequacy of Device Shape and/or Size	Intraocular Pressure Increased; No Code Available	N/A	NA	1	Event Description: THE REPORTER INDICATED THAT THE SURGEON IMPLANTED A 13.2MM VTICM5_13.2, -3.00/0.5/080 (SPHERE/CYLINDER/AXIS), IMPLANTABLE COLLAMER LENS INTO THE PATIENT'S LEFT EYE (OS) ON (B)(6) 2020. THE LENS WAS REMOVED AND REPLACED ON (B)(6) 2020 FOR A SHORTER LENGTH LENS DUE TO ANGLE CLOSURE WITH ELEVATED IOP (20.5MMHG) BEING OBSERVED ON (B)(6) 2020 AND EXCESSIVE VAULT. THIS RESOLVED THE P…	Lens Exchange	Resolved
https://www.accessdata.fda.gov/scripts/cdrh/cfdocs/cfMAUDE/Detail.CFM?MDRFOI__ID=9957586&pc=QCB	2023826-2020-00846	2020-03-13 04:00:00	Injury	STAAR SURGICAL COMPANY	2020-04-14 04:00:00	QCB	IMPLANTABLE COLLAMER LENS (ICL)	Inadequacy of Device Shape and/or Size	Intraocular Pressure Increased; No Code Available	N/A	NA	1	Event Description: THE REPORTER INDICATED THAT THE SURGEON IMPLANTED A 13.2MM VTICM5_13.2, -3.50/1.0/109 (SPHERE/CYLINDER/AXIS), IMPLANTABLE COLLAMER LENS INTO THE PATIENT'S RIGHT EYE (OD) ON (B)(6) 2020. THE LENS WAS REMOVED AND REPLACED ON (B)(6) 2020 FOR A SHORTER LENGTH LENS DUE TO ANGLE CLOSURE WITH ELEVATED IOP (28.5MMHG) BEING OBSERVED ON (B)(6) 2020 AND EXCESSIVE VAULT. THIS RESOLVED THE …	Lens Exchange	Resolved
https://www.accessdata.fda.gov/scripts/cdrh/cfdocs/cfMAUDE/Detail.CFM?MDRFOI__ID=9960150&pc=QCB	2023826-2020-00856	2019-11-21 05:00:00	Injury	STAAR SURGICAL COMPANY	2020-04-14 04:00:00	QCB	IMPLANTABLE COLLAMER LENS (ICL)	Inadequacy of Device Shape and/or Size	Intraocular Pressure Increased; No Code Available	NA	NA	1	Event Description: THE REPORTER INDICATED THAT THE SURGEON IMPLANTED A 13.2MM VTICMO13.2 IMPLANTABLE COLLAMER LENS, -11.5/+2.0/095 (SPHERE/CYLINDER/AXIS), INTO THE PATIENT'S LEFT EYE (OS) ON (B)(6) 2019. ON (B)(6) 2019 THE LENS WAS EXCHANGED WITH A SHORTER LENS DUE TO EXCESSIVE VAULT AND ELEVATED IOP. THE PROBLEM WAS RESOLVED. THE CAUSE OF THE EVENT IS REPORTED AS UNKNOWN. Manufacturer Narrative:…	Lens Exchange	Resolved
https://www.accessdata.fda.gov/scripts/cdrh/cfdocs/cfMAUDE/Detail.CFM?MDRFOI__ID=9991666&pc=QCB	2023826-2020-00950	2019-10-09 04:00:00	Injury	STAAR SURGICAL COMPANY	2020-04-23 04:00:00	QCB	IMPLANTABLE COLLAMER LENS (ICL)	Inadequacy of Device Shape and/or Size	Intraocular Pressure Increased; No Code Available	NA	NA	1	Event Description: THE REPORTER INDICATED THE SURGEON IMPLANTED A 13.2MM VTICMO13.2 IMPLANTABLE COLLAMER LENS, -13.5/+2.0/070 (SPHERE/CYLINDER/AXIS), IN THE PATIENTS RIGHT EYE (OD), ON (B)(6) 2019. THE LENS WAS EXPLANTED ON (B)(6) 2019 DUE TO EXCESSIVE VAULTING AND ELEVATED INTRAOCULAR PRESSURE (IOP). THE LENS WAS EXCHANGED FOR A SHORTER LENS AND THE PROBLEM WAS RESOLVED. THE CAUSE OF THE EVENT W…	Lens Exchange	Resolved
https://www.accessdata.fda.gov/scripts/cdrh/cfdocs/cfMAUDE/Detail.CFM?MDRFOI__ID=10025642&pc=QCB	2023826-2020-01002	2019-02-27 05:00:00	Injury	STAAR SURGICAL COMPANY	2020-05-05 04:00:00	QCB	IMPLANTABLE COLLAMER LENS (ICL)	Off-Label Use; Adverse Event Without Identified Device or Use Problem	Intraocular Pressure Increased; No Code Available	NA	NA	1	Event Description: THE REPORTER INDICATED THAT THE SURGEON IMPLANTED A 12.1MM VTICMO12.1 IMPLANTABLE COLLAMER LENS, -7.0/+1.5/045 (SPHERE/CYLINDER/AXIS), INTO THE PATIENT'S LEFT EYE (OS) ON (B)(6) 2019. ON (B)(6) 2019 THE LENS WAS EXPLANTED DUE TO ELEVATED IOP. THE CAUSE OF THE EVENT IS REPORTED AS UNKNOWN. THE PROBLEM WAS RESOLVED AFTER EXPLANT. Manufacturer Narrative: H3 - DEVICE EVALUATION: TH…	Lens Extraction	Resolved
https://www.accessdata.fda.gov/scripts/cdrh/cfdocs/cfMAUDE/Detail.CFM?MDRFOI__ID=10032664&pc=QCB	2023826-2020-01022	2020-04-10 04:00:00	Injury	STAAR SURGICAL COMPANY	2020-05-07 04:00:00	QCB	IMPLANTABLE COLLAMER LENS (ICL)	Inadequacy of Device Shape and/or Size	Intraocular Pressure Increased; No Code Available	N/A	NA	1	Event Description: THE REPORTER INDICATED THAT A 13.2MM, VTICH13.2, -3.00/2.5/017 (SPHERE/ CYLINDER/ AXIS), IMPLANTABLE COLLAMER LENS WAS IMPLANTED INTO THE PATIENT'S RIGHT EYE (OD) ON (B)(6) 2020. ANGLE CLOSURE WITH ELEVATED IOP (20 MMHG) ON (B)(6) 2020 AND EXCESSIVE VAULT WERE OBSERVED. ADDITION OF NEW PI AND YAG WAS PERFORMED. THE LENS WAS REMOVED AND EXCHANGED FOR A SHORTER LENGTH LENS AND TH…	Lens Exchange	Resolved
https://www.accessdata.fda.gov/scripts/cdrh/cfdocs/cfMAUDE/Detail.CFM?MDRFOI__ID=10044695&pc=QCB	2023826-2020-01053	2019-11-21 05:00:00	Injury	STAAR SURGICAL COMPANY	2020-05-11 04:00:00	QCB	IMPLANTABLE COLLAMER LENS (ICL)	Inadequacy of Device Shape and/or Size	Intraocular Pressure Increased; No Code Available	NA	NA	1	Event Description: THE REPORTER INDICATED THAT A 13.2MM, VTICMO13.2,-12.5/2.5/092 (SPHERE/CYLINDER/AXIS), IMPLANTABLE COLLAMER LENS WAS IMPLANTED INTO THE PATIENTS RIGHT EYE (OD) ON (B)(6) 2019. ON (B)(6) 2019 THE LENS WAS EXCHANGED FOR A SHORTER LENGTH LENS DUE TO EXCESSIVE VAULT. THIS EXCHANGE RESOLVED THE PROBLEM. Manufacturer Narrative: DEVICE EVALUATION: LENS RETURNED IN A MICRO CENTRIFUGE V…	Lens Exchange	Resolved
https://www.accessdata.fda.gov/scripts/cdrh/cfdocs/cfMAUDE/Detail.CFM?MDRFOI__ID=10044899&pc=QCB	2023826-2020-01054	2019-08-08 04:00:00	Injury	STAAR SURGICAL COMPANY	2020-05-11 04:00:00	QCB	IMPLANTABLE COLLAMER LENS (ICL)	Off-Label Use; Inadequacy of Device Shape and/or Size	Intraocular Pressure Increased; No Code Available	NA	NA	1	Event Description: THE REPORTER INDICATED THAT A 13.2MM, VTICMO13.2,-14.0/1.0/124 (SPHERE/CYLINDER/AXIS), IMPLANTABLE COLLAMER LENS WAS IMPLANTED INTO THE PATIENTS RIGHT EYE (OD) ON (B)(6) 2019. ON (B)(6) 2019 THE LENS WAS EXCHANGED FOR A SHORTER LENGTH LENS DUE TO EXCESSIVE VAULT. THIS EXCHANGE RESOLVED THE PROBLEM. Manufacturer Narrative: CORRECTED DATA: B5 - IT WAS ALSO REPORTED THE PATIENT EX…	Lens Exchange	Resolved
https://www.accessdata.fda.gov/scripts/cdrh/cfdocs/cfMAUDE/Detail.CFM?MDRFOI__ID=10044986&pc=QCB	2023826-2020-01055	2020-01-10 05:00:00	Injury	STAAR SURGICAL COMPANY	2020-05-11 04:00:00	QCB	IMPLANTABLE COLLAMER LENS (ICL)	Inadequacy of Device Shape and/or Size	Intraocular Pressure Increased; No Code Available	NA	NA	1	Event Description: THE REPORTER INDICATED THAT A 13.7MM, VTICMO13.1,-12.0/1.0/125 (SPHERE/CYLINDER/AXIS), IMPLANTABLE COLLAMER LENS WAS IMPLANTED INTO THE PATIENTS RIGHT EYE (OD) ON (B)(6) 2020. ON (B)(6) 2020 THE LENS WAS EXCHANGED FOR A SHORTER LENGTH LENS DUE TO EXCESSIVE VAULT. THIS EXCHANGE RESOLVED THE PROBLEM. Manufacturer Narrative: ADDITIONAL INFORMATION : H3-DEVICE EVALUATION: LENS RETU…	Lens Exchange	Resolved
https://www.accessdata.fda.gov/scripts/cdrh/cfdocs/cfMAUDE/Detail.CFM?MDRFOI__ID=10242445&pc=QCB	2023826-2020-01423	2020-02-27 05:00:00	Injury	STAAR SURGICAL COMPANY	2020-07-07 04:00:00	QCB	IMPLANTABLE COLLAMER LENS (ICL)	Adverse Event Without Identified Device or Use Problem	Intraocular Pressure Increased; No Code Available	NA	NA	1	Event Description: THE REPORTER INDICATED THE SURGEON IMPLANTED A 12.6MM VTICM5_12.6 IMPLANTABLE COLLAMER LENS, -10.50/+1.5/094 (SPHERE/CYLINDER/AXIS), IN THE PATIENT'S RIGHT EYE (OD), ON (B)(6) 2020. THE LENS WAS EXPLANTED ON (B)(6) 2020 DUE TO ELEVATED INTRAOCULAR PRESSURE (IOP). THE SURGEON DID NOT IMPLANT ANOTHER ICL LENS. Manufacturer Narrative: H3: DEVICE EVALUATION: THE LENS WAS RETURNED I…	Lens Extraction	Unknown
https://www.accessdata.fda.gov/scripts/cdrh/cfdocs/cfMAUDE/Detail.CFM?MDRFOI__ID=10392960&pc=QCB	2023826-2020-01672	2020-06-23 04:00:00	Injury	STAAR SURGICAL COMPANY	2020-08-11 04:00:00	QCB	IMPLANTABLE COLLAMER LENS (ICL)	Adverse Event Without Identified Device or Use Problem	Intraocular Pressure Increased; No Code Available	NA	NA	1	Event Description: THE REPORTER INDICATED THE SURGEON IMPLANTED A 12.1MM VTICM5_12.1 IMPLANTABLE COLLAMER LENS, -10.00/+2.5/085 (SPHERE/CYLINDER/AXIS), IN THE PATIENT'S LEFT EYE (OS), ON (B)(6) 2020. THE LENS WAS EXPLANTED ON (B)(6) 2020 DUE TO ELEVATED INTRAOCULAR PRESSURE AND UNREACTIVE (FIXED) PUPIL. THE SURGEON DID NOT IMPLANT ANOTHER ICL LENS. Manufacturer Narrative: H3 - DEVICE EVALUATION: …	Lens Extraction	Unknown
https://www.accessdata.fda.gov/scripts/cdrh/cfdocs/cfMAUDE/Detail.CFM?MDRFOI__ID=10398745&pc=QCB	2023826-2020-01707	2020-07-10 04:00:00	Injury	STAAR SURGICAL COMPANY	2020-08-12 04:00:00	QCB	IMPLANTABLE COLLAMER LENS (ICL)	Inadequacy of Device Shape and/or Size	Intraocular Pressure Increased; No Code Available	P030016	NA	1	Event Description: THE REPORTER INDICATED THE SURGEON IMPLANTED A 13.2MM TMICL13.2 IMPLANTABLE COLLAMER LENS, -15.50/+1.5/091 (SPHERE/CYLINDER/AXIS), IN THE PATIENTS RIGHT EYE (OD) ON (B)(6) 2020. THE LENS WAS EXPLANTED ON (B)(6) 2020 DUE TO LENS WAS TOO LARGE, CAUSING ELEVATED INTRAOCULAR PRESSURE (IOP). THE INCISION WAS ENLARGED TO REMOVE THE LENS AND A SUTURE WAS REQUIRED. ADDITIONAL INFORMATI…	Lens Exchange	Resolved
https://www.accessdata.fda.gov/scripts/cdrh/cfdocs/cfMAUDE/Detail.CFM?MDRFOI__ID=10416135&pc=QCB	2023826-2020-01714	2020-07-02 04:00:00	Injury	STAAR SURGICAL COMPANY	2020-08-17 04:00:00	QCB	IMPLANTABLE COLLAMER LENS (ICL)	Off-Label Use; Inadequacy of Device Shape and/or Size	Intraocular Pressure Increased; No Code Available	NA	NA	1	Event Description: THE REPORTER INDICATED THE SURGEON IMPLANTED A 13.2MM VTICM5_13.2 IMPLANTABLE COLLAMER LENS, -08.00/+1.5/101 (SPHERE/CYLINDER/AXIS), IN THE PATIENTS RIGHT EYE (OD), ON (B)(6) 2020. THE LENS HAD EXCESSIVE VAULTING, WITH ELEVATED INTRAOCULAR PRESSURE, SIGNIFICANT REDUCTION OF IRIDO-CORNEAL ANGLES AND PIGMENT DISPERSION. THE LENS REMAINED IMPLANTED. THE CAUSE OF THE EVENT WAS UNKN…	Lens Exchange	Resolved
https://www.accessdata.fda.gov/scripts/cdrh/cfdocs/cfMAUDE/Detail.CFM?MDRFOI__ID=10417803&pc=QCB	2023826-2020-01752	2019-08-16 04:00:00	Injury	STAAR SURGICAL COMPANY	2020-08-17 04:00:00	QCB	IMPLANTABLE COLLAMER LENS (ICL)	Inadequacy of Device Shape and/or Size	Intraocular Pressure Increased; No Code Available	NA	NA	1	Event Description: THE REPORTER INDICATED THAT A 13.2MM, VTICMO13.2, -4.5/1.0/061 (SPHERE/CYLINDER/AXIS), IMPLANTABLE COLLAMER LENS WAS IMPLANTED INTO THE PATIENTS LEFT EYE (OS) ON (B)(6) 2019. ON (B)(6) 2019 THE LENS WAS EXPLANTED DUE TO EXCESSIVE VAULT AND ELEVATED IOP, IT WAS REPORTED THAT THE PROBLEM RESOLVED AFTER LENS EXPLANT. THE REPORTER STATED " THE BASIC INTRAOCULAR PRESSURE OF THE PATI…	Lens Extraction + Secondary Operation	Resolved
https://www.accessdata.fda.gov/scripts/cdrh/cfdocs/cfMAUDE/Detail.CFM?MDRFOI__ID=10440601&pc=QCB	2023826-2020-01816	2020-07-29	Injury	STAAR SURGICAL COMPANY	2020-08-23	QCB	IMPLANTABLE COLLAMER LENS (ICL)	Inadequacy of Device Shape and/or Size	Intraocular Pressure Increased; No Code Available	NA	NA	1	Event Description: THE REPORTER INDICATED THE SURGEON IMPLANTED A 13.2MM VTICM5_13.2 IMPLANTABLE COLLAMER LENS, -12.50/+1.0/174 (SPHERE/CYLINDER/AXIS), IN THE PATIENTS LEFT EYE (OS), ON (B)(6) 2020. THE LENS WAS REPORTED AS HAVING EXCESSIVE VAULTING, ELEVATED INTRAOCULAR PRESSURE AND SIGNIFICANT REDUCTION OF IRIDO-CORNEAL ANGLES. A COUPLE OF WEEKS LATER, THE VAULT HAD COME DOWN, SO THE SURGEON DE…	Lens Retention	Unknown
https://www.accessdata.fda.gov/scripts/cdrh/cfdocs/cfMAUDE/Detail.CFM?MDRFOI__ID=10445835&pc=QCB	2023826-2020-01815	2020-07-29 04:00:00	Injury	STAAR SURGICAL COMPANY	2020-08-24 04:00:00	QCB	IMPLANTABLE COLLAMER LENS (ICL)	Inadequacy of Device Shape and/or Size	Intraocular Pressure Increased; No Code Available	NA	NA	1	Event Description: THE REPORTER INDICATED THE SURGEON IMPLANTED A 13.2MM VTICM5_13.2 IMPLANTABLE COLLAMER LENS, -13.00/+1.0/010 (SPHERE/CYLINDER/AXIS), IN THE PATIENTS RIGHT EYE (OD), ON (B)(6) 2020. THE LENS WAS EXPLANTED ON (B)(6) 2020 DUE TO EXCESSIVE VAULTING, ELEVATED INTRAOCULAR PRESSURE AND SIGNIFICANT REDUCTION OF IRIDO-CORNEAL ANGLES. THE LENS WAS EXCHANGED FOR A SHORTER LENS. THE CAUSE …	Lens Exchange	Unknown
https://www.accessdata.fda.gov/scripts/cdrh/cfdocs/cfMAUDE/Detail.CFM?MDRFOI__ID=10476011&pc=QCB	2023826-2020-01938	2020-07-15 04:00:00	Injury	STAAR SURGICAL COMPANY	2020-09-01 04:00:00	QCB	IMPLANTABLE COLLAMER LENS (ICL)	Inadequacy of Device Shape and/or Size	Intraocular Pressure Increased; No Code Available	NA	NA	1	Event Description: THE REPORTER INDICATED THE SURGEON IMPLANTED A 13.2MM VTICM5_13.2 IMPLANTABLE COLLAMER LENS, -12.0/+1.00/090 (SPHERE/CYLINDER/AXIS), IN THE PATIENTS LEFT EYE (OS), ON (B)(6) 2020. THE LENS WAS EXPLANTED ON (B)(6) 2020 DUE TO EXCESSIVE VAULTING, ANGLE CLOSURE, WITH ELEVATED INTRAOCULAR PRESSURE (IOP). THE LENS WAS EXCHANGED FOR A SHORTER LENS AND THE PROBLEM WAS RESOLVED. Manufa…	Lens Exchange	Resolved
https://www.accessdata.fda.gov/scripts/cdrh/cfdocs/cfMAUDE/Detail.CFM?MDRFOI__ID=10476114&pc=QCB	2023826-2020-01934	2020-07-02 04:00:00	Injury	STAAR SURGICAL COMPANY	2020-09-01 04:00:00	QCB	IMPLANTABLE COLLAMER LENS (ICL)	Inadequacy of Device Shape and/or Size	Intraocular Pressure Increased; No Code Available	N/A	NA	1	Event Description: THE REPORTER INDICATED THE SURGEON IMPLANTED A 12.6MM VTICM5_12.6 IMPLANTABLE COLLAMER LENS, -11.00/+2.0/090 (SPHERE/CYLINDER/AXIS), IN THE PATIENT'S RIGHT EYE (OD), ON (B)(6) 2020. THE LENS WAS EXPLANTED LATER THAT SAME DAY ON (B)(6) 2020 DUE TO EXCESSIVE VAULTING AND ELEVATED INTRAOCULAR PRESSURE. THE LENS WAS EXCHANGED FOR A SHORTER LENS BUT THE PROBLEM WAS NOT RESOLVED. SEE…	Lens Exchange	Not_Resolved
https://www.accessdata.fda.gov/scripts/cdrh/cfdocs/cfMAUDE/Detail.CFM?MDRFOI__ID=10416144&pc=QCB	2023826-2020-01715	2020-07-02 04:00:00	Injury	STAAR SURGICAL COMPANY	2020-08-17 04:00:00	QCB	IMPLANTABLE COLLAMER LENS (ICL)	Off-Label Use; Inadequacy of Device Shape and/or Size	Intraocular Pressure Increased; No Code Available; Appropriate Clinical Signs, Symptoms, Conditions Term / Code Not Available	NA	NA	1	Event Description: THE REPORTER INDICATED THE SURGEON IMPLANTED A 13.2MM VTICM5_13.2 IMPLANTABLE COLLAMER LENS, -07.00/+1.0/064 (SPHERE/CYLINDER/AXIS), IN THE PATIENTS LEFT EYE (OS), ON (B)(6) 2020. THE LENS HAD EXCESSIVE VAULTING, WITH ELEVATED INTRAOCULAR PRESSURE, SIGNIFICANT REDUCTION OF IRIDO-CORNEAL ANGLES AND PIGMENT DISPERSION. THE LENS REMAINED IMPLANTED. THE CAUSE OF THE EVENT WAS UNKNO…	Lens Exchange	Resolved
https://www.accessdata.fda.gov/scripts/cdrh/cfdocs/cfMAUDE/Detail.CFM?MDRFOI__ID=12957740&pc=QCB	2023826-2021-04643	2021-11-11 05:00:00	Injury	STAAR SURGICAL COMPANY	2021-12-07 05:00:00	QCB	IMPLANTABLE COLLAMER LENS (ICL)	Off-Label Use; Inadequacy of Device Shape and/or Size	Intraocular Pressure Increased; Pain; Appropriate Clinical Signs, Symptoms, Conditions Term / Code Not Available	P030016	NA	1	Event Description: THE REPORTER INDICATED THE SURGEON IMPLANTED A 12.6MM TMICL12.6 IMPLANTABLE COLLAMER LENS, -17.00/+4.0/117 (SPHERE/CYLINDER/AXIS), INTO THE PATIENTS RIGHT EYE (OD) ON (B)(6) 2021. THE LENS WAS EXPLANTED ON (B)(6) 2021 DUE TO EXCESSIVE VAULTING, ANGLE CLOSURE AND ELEVATED IOP. THE ANTERIOR CHAMBER WAS IRRIGATED/ EVACUATED OF VISCO/ FLUIDS AND THE WOUND WAS BURPED, CONFIRMING THE…	Lens Extraction + Secondary Operation	Resolved
https://www.accessdata.fda.gov/scripts/cdrh/cfdocs/cfMAUDE/Detail.CFM?MDRFOI__ID=12965310&pc=QCB	2023826-2021-04644	2021-11-11 05:00:00	Injury	STAAR SURGICAL COMPANY	2021-12-08 05:00:00	QCB	IMPLANTABLE COLLAMER LENS (ICL)	Off-Label Use; Inadequacy of Device Shape and/or Size	Intraocular Pressure Increased; Pain; Appropriate Clinical Signs, Symptoms, Conditions Term / Code Not Available	P030016	NA	1	Event Description: THE REPORTER INDICATED THE SURGEON IMPLANTED A 12.6MM TMICL12.6 IMPLANTABLE COLLAMER LENS, -17.50/+4.0/065 (SPHERE/CYLINDER/AXIS), INTO THE PATIENTS LEFT EYE (OS) ON (B)(6) 2021. THE LENS WAS EXPLANTED ON (B)(6) 2021 DUE TO EXCESSIVE VAULTING, ANGLE CLOSURE AND ELEVATED IOP. THE ANTERIOR CHAMBER WAS IRRIGATED/EVACUATED OF VISCO/ FLUIDS AND THE WOUND WAS BURPED, CONFIRMING THERE…	Lens Extraction + Secondary Operation	Resolved
https://www.accessdata.fda.gov/scripts/cdrh/cfdocs/cfMAUDE/Detail.CFM?MDRFOI__ID=13182702&pc=QCB	2023826-2022-00022	NA	Injury	STAAR SURGICAL COMPANY	2022-01-06 05:00:00	QCB	IMPLANTABLE COLLAMER LENS	Inadequacy of Device Shape and/or Size	Intraocular Pressure Increased; Pain; Appropriate Clinical Signs, Symptoms, Conditions Term / Code Not Available	P030016	NA	1	Event Description: THE REPORTER INDICATED THAT THE SURGEON IMPLANTED A 13.2MM TMICL13.2 IMPLANTABLE COLLAMER LENS -13.5/+3.5/162 (SPHERE/CYLINDER/AXIS) INTO THE PATIENT'S RIGHT (OD) EYE ON (B)(6) 2021. ON (B)(6) 2021 THE LENS WAS EXPLANTED DUE TO EXCESSIVE VAULT, ELEVATED IOP, SHALLOW AC AND ANGLES, PAIN, AND VOMITING. Manufacturer Narrative: H3-DEVICE EVALUATION: THE LENS WAS RETURNED IN LIQUID …	Lens Extraction	Unknown
https://www.accessdata.fda.gov/scripts/cdrh/cfdocs/cfMAUDE/Detail.CFM?MDRFOI__ID=13182711&pc=QCB	2023826-2022-00023	NA	Injury	STAAR SURGICAL COMPANY	2022-01-06 05:00:00	QCB	IMPLANTABLE COLLAMER LENS	Inadequacy of Device Shape and/or Size	Intraocular Pressure Increased; Pain; Appropriate Clinical Signs, Symptoms, Conditions Term / Code Not Available	P030016	NA	1	Event Description: THE REPORTER INDICATED THAT THE SURGEON IMPLANTED A 13.2MM TMICL13.2 IMPLANTABLE COLLAMER LENS -14.0/+3.5/162 (SPHERE/CYLINDER/AXIS) INTO THE PATIENT'S LEFT (OS) EYE ON (B)(6) 2021. ON (B)(6) 2021, THE LENS WAS EXPLANTED DUE TO EXCESSIVE VAULT, ELEVATED IOP, SHALLOW AC AND ANGLES, PAIN, AND VOMITING. Manufacturer Narrative: H3-DEVICE EVALUATION: THE LENS WAS RETURNED IN LIQUID …	Lens Extraction	Unknown
https://www.accessdata.fda.gov/scripts/cdrh/cfdocs/cfMAUDE/Detail.CFM?MDRFOI__ID=17970222&pc=QCB	2023826-2023-04631	NA	Injury	STAAR SURGICAL COMPANY	2023-10-19 04:00:00	QCB	IMPLANTABLE COLLAMER LENS (ICL)	Inadequacy of Device Shape and/or Size	Intraocular Pressure Increased; Pain; Blurred Vision; Appropriate Clinical Signs, Symptoms, Conditions Term / Code Not Available	P030016	NA	1	Event Description: THE REPORTER INDICATED THAT A 13.2MM VTICM5_13.2 IMPLANTABLE COLLAMER LENS OF -10.0/3.5/094 (SPHERE/CYLINDER/AXIS) WAS IMPLANTED INTO THE PATIENT'S LEFT EYE (OS) ON (B)(6) 2023. ON (B)(6) -2023 THE LENS WAS EXPLANTED DUE TO EXCESSIVE VAULT, ELEVATED IOP, ANGLE CLOSURE AND PIGMENT DISPERSION. A REPLACEMENT LENS OF SHORTER LENGTH WAS LATER IMPLANTED AND THE PROBLEM RESOLVED (VAUL…	Lens Exchange	Resolved
https://www.accessdata.fda.gov/scripts/cdrh/cfdocs/cfMAUDE/Detail.CFM?MDRFOI__ID=17378095&pc=QCB	2023826-2023-03101	NA	Injury	STAAR SURGICAL COMPANY	2023-07-24 04:00:00	QCB	IMPLANTABLE COLLAMER LENS (ICL)	Inadequacy of Device Shape and/or Size; No Apparent Adverse Event	Intraocular Pressure Increased; Pain; No Clinical Signs, Symptoms or Conditions	P030016	NA	1	Event Description: THE REPORTER INDICATED THE SURGEON IMPLANTED A 12.6MM VTICM5_12.6 IMPLANTABLE COLLAMER LENS, -12.00/+2.5/085 (SPHERE/CYLINDER/AXIS), INTO THE PATIENTS LEFT EYE (OS). THE LENS REMAINED IMPLANTED. ADDITIONAL INFORMATION HAS BEEN REQUESTED BUT NONE HAS BEEN FORTHCOMING. Manufacturer Narrative: A2: UNK. A3: UNK. A4: UNK. A5: UNK. A6: UNK. B3: UNK. D6A: UNK. D6B: UNK. H6 - WORK ORDE…	Lens Exchange	Resolved
https://www.accessdata.fda.gov/scripts/cdrh/cfdocs/cfMAUDE/Detail.CFM?MDRFOI__ID=8611930&pc=QCB	2023826-2019-00782	2019-03-25 04:00:00	Injury	STAAR SURGICAL COMPANY	2019-05-15 04:00:00	QCB	IMPLANTABLE COLLAMER LENS (ICL)	Inadequacy of Device Shape and/or Size	Intraocular Pressure Increased; Pain; No Code Available	P030016	NA	1	Event Description: THE REPORTER INDICATED THAT A 13.7MM, TMICL13.7, -10.00/2.0/089 (SPHERE/CYLINDER/AXIS), IMPLANTABLE COLLAMER LENS WAS IMPLANTED INTO THE PATIENT'S RIGHT EYE (OD) ON (B)(6) 2019. SHALLOW ANTERIOR CHAMBER AND LOW VAULT WAS OBSERVED. PATIENT HAD ELEVATED IOP AND PAIN. THE LENS WAS REPOSITIONED BUT THE PROBLEM WAS NOT RESOLVED. THE LENS WAS REMOVED AND EXCHANGED FOR A SHORTER LENGT…	Lens Exchange	Resolved
https://www.accessdata.fda.gov/scripts/cdrh/cfdocs/cfMAUDE/Detail.CFM?MDRFOI__ID=9034019&pc=QCB	2023826-2019-01672	2019-07-20 04:00:00	Injury	STAAR SURGICAL COMPANY	2019-09-13 04:00:00	QCB	IMPLANTABLE COLLAMER LENS (ICL)	Adverse Event Without Identified Device or Use Problem	Intraocular Pressure Increased; Pain; No Code Available	P030016	NA	1	Event Description: THE REPORTER INDICATED THAT A 13.2MM, TMICL13.2, -12.50/3.5/067 (SPHERE/CYLINDER/AXIS), IMPLANTABLE COLLAMER LENS WAS IMPLANTED INTO THE PATIENT'S EYE. REPORTEDLY THE "LENS WAS REMOVED DUE TO SEVERE PAIN, LENS WAS WRONG LENGTH. SURGEON REMOVED LENS AND DID NOT IMPLANT ANY OTHER LENS." ADDITIONAL INFORMATION HAS BEEN REQUESTED BUT NONE HAS BEEN FORTHCOMING. IF ADDITIONAL INFORMA…	Lens Extraction	Resolved
https://www.accessdata.fda.gov/scripts/cdrh/cfdocs/cfMAUDE/Detail.CFM?MDRFOI__ID=9034043&pc=QCB	2023826-2019-01671	2019-07-20 04:00:00	Injury	STAAR SURGICAL COMPANY	2019-09-13 04:00:00	QCB	IMPLANTABLE COLLAMER LENS (ICL)	Adverse Event Without Identified Device or Use Problem	Intraocular Pressure Increased; Pain; No Code Available	P030016	NA	1	Event Description: THE REPORTER INDICATED THAT A 13.2MM, TMICL13.2, -13.00/3.5/088 (SPHERE/CYLINDER/AXIS), IMPLANTABLE COLLAMER LENS WAS IMPLANTED INTO THE PATIENT'S EYE. REPORTEDLY THE "LENS WAS REMOVED DUE TO SEVERE PAIN, LENS WAS WRONG LENGTH. SURGEON REMOVED LENS AND DID NOT IMPLANT ANY OTHER LENS." ADDITIONAL INFORMATION HAS BEEN REQUESTED BUT NONE HAS BEEN FORTHCOMING. IF ADDITIONAL INFORMA…	Lens Extraction	Resolved
https://www.accessdata.fda.gov/scripts/cdrh/cfdocs/cfMAUDE/Detail.CFM?MDRFOI__ID=13240884&pc=QCB	2023826-2022-00156	2022-01-05 05:00:00	Injury	STAAR SURGICAL COMPANY	2022-01-12 05:00:00	QCB	IMPLANTABLE COLLAMER LENS (ICL)	Misfocusing	Intraocular Pressure Increased; Pain; Pupillary Block; Blurred Vision; Appropriate Clinical Signs, Symptoms, Conditions Term / Code Not Available	NA	NA	1	Event Description: THE REPORTER INDICATED THAT THE SURGEON IMPLANTED A 12.6MM TMICL_12.6; -10.50/+1.00/088 (SPHERE/CYLINDER/AXIS) IMPLANTABLE COLLAMER LENS INTO THE PATIENT'S LEFT EYE (OS) ON (B)(6) 2021. THE PATIENT EXPERIENCED PUPIL BLOCK WITH ELEVATED INTRAOCULAR PRESSURE; ACUTE ANGLE CLOSURE SECONDARY TO PUPILLARY BLOCK FOLLOWING PHARMACOLOGIC MYDRIASIS; PAIN; DECREASED VISUAL ACUITY; NAUSEA;…	Lens Retention	Resolved
https://www.accessdata.fda.gov/scripts/cdrh/cfdocs/cfMAUDE/Detail.CFM?MDRFOI__ID=17200420&pc=QCB	2023826-2023-02472	2023-05-30 04:00:00	Injury	STAAR SURGICAL COMPANY	2023-06-26 04:00:00	QCB	IMPLANTABLE COLLAMER LENS (ICL)	Adverse Event Without Identified Device or Use Problem	Intraocular Pressure Increased; Pain; Pupillary Block; Discomfort	P030016	NA	1	Event Description: THE REPORTER INDICATED THE SURGEON IMPLANTED A 12.6MM VTICMO12.6 IMPLANTABLE COLLAMER LENS, -10.00/+1.5/074 (SPHERE/CYLINDER/AXIS), IN THE PATIENTS LEFT EYE (OS), ON (B)(6) 2023. THE LENS WAS EXPLANTED ON (B)(6) 2023 DUE TO PATIENT EXPERIENCED PUPIL BLOCK WITH ELEVATED INTRAOCULAR PRESSURE (IOP). THE LENS WAS REPLACED WITH ANOTHER SAME MODEL/LENGTH LENS AND THE PROBLEM WAS RESO…	Lens Exchange	Resolved
https://www.accessdata.fda.gov/scripts/cdrh/cfdocs/cfMAUDE/Detail.CFM?MDRFOI__ID=11478860&pc=QCB	2023826-2021-00635	2021-02-10 05:00:00	Injury	STAAR SURGICAL COMPANY	2021-03-14 05:00:00	QCB	IMPLANTABLE COLLAMER LENS (ICL)	Inadequacy of Device Shape and/or Size	Intraocular Pressure Increased; Pain; Retinal Detachment; Appropriate Clinical Signs, Symptoms, Conditions Term / Code Not Available	NA	NA	1	Event Description: THE REPORTER INDICATED THE SURGEON IMPLANTED A 13.2MM VTICMO13.2 IMPLANTABLE COLLAMER LENS, -18.00/+2.5/088 (SPHERE/CYLINDER/AXIS), IN THE PATIENTS LEFT EYE (OS) ON (B)(6) 2020. THE LENS WAS REPORTED AS BEING TOO BIG, THE CORNERS OF THE ANTERIOR CHAMBER ARE CLOSED, INTRAOCULAR PRESSURE IS ELEVATED, DESPITE REGULAR USE OF ANTIHYPERTENSIVE DRUGS AND THE PATIENT COMPLAINS OF SQUEE…	Lens Retention + Secondary Operation	Unknown
https://www.accessdata.fda.gov/scripts/cdrh/cfdocs/cfMAUDE/Detail.CFM?MDRFOI__ID=11349059&pc=QCB	2023826-2021-00497	2020-12-01	Injury	STAAR SURGICAL COMPANY	2021-02-19	QCB	IMPLANTABLE COLLAMER LENS (ICL)	Inadequacy of Device Shape and/or Size	Intraocular Pressure Increased; Pupillary Block	NA	NA	1	Event Description: THE REPORTER INDICATED THAT A 13.2MM, VTICMO13.2, -17.50/1.0/023 (SPHERE/CYLINDER/AXIS), IMPLANTABLE COLLAMER LENS WAS IMPLANTED INTO THE PATIENTS LEFT EYE (OS) ON (B)(6) 2020. ON (B)(6) 2021 THE LENS WAS EXCHANGED FOR A SHORTER LENGTH LENS DUE TO EXCESSIVE VAULT AND PUPIL BLOCK WITH ELEVATED IOP . THIS EXCHANGE RESOLVED THE PROBLEM. CAUSE OF THE EVENT WAS REPORTER AS "LENGTH I…	Lens Exchange	Resolved
https://www.accessdata.fda.gov/scripts/cdrh/cfdocs/cfMAUDE/Detail.CFM?MDRFOI__ID=11942691&pc=QCB	2023826-2021-01763	2021-05-12 04:00:00	Injury	STAAR SURGICAL COMPANY	2021-06-04 04:00:00	QCB	IMPLANTABLE COLLAMER LENS (ICL)	Inadequacy of Device Shape and/or Size	Intraocular Pressure Increased; Pupillary Block	P030016	NA	1	Event Description: THE REPORTER INDICATED THAT THE SURGEON IMPLANTED A 12.6MM TMICL12.6 LENS, -16.0/+1.0/068 (SPHERE/CYLINDER/AXIS) INTO THE PATIENT'S RIGHT (OD) EYE ON (B)(6) 2021. ON (B)(6) 2021 THE LENS WAS EXPLANTED AND REPLACED WITH A SHORTER LENS DUE TO EXCESSIVE VAULT, PUPIL BLOCK, AND ELEVATED IOP. THE PROBLEM IS RESOLVED. Manufacturer Narrative: B5-ADDITIONAL INFO: "DESPITE ALL CALCULATI…	Lens Exchange	Resolved
https://www.accessdata.fda.gov/scripts/cdrh/cfdocs/cfMAUDE/Detail.CFM?MDRFOI__ID=13057192&pc=QCB	2023826-2021-04911	2021-11-10 05:00:00	Injury	STAAR SURGICAL COMPANY	2021-12-21 05:00:00	QCB	IMPLANTABLE COLLAMER LENS (ICL)	Adverse Event Without Identified Device or Use Problem	Intraocular Pressure Increased; Pupillary Block	NA	NA	1	Event Description: THE REPORTER INDICATED THE SURGEON IMPLANTED A 13.2MM VTICM5_13.2 IMPLANTABLE COLLAMER LENS, -10.00/+1.0/087 (SPHERE/CYLINDER/AXIS) INTO THE PATIENTS LEFT EYE (OS) ON (B)(6) 2021. THE PATIENT EXPERIENCED PUPIL BLOCK WITH ELEVATED INTRAOCULAR PRESSURE (IOP) AND THE LENS REMAINED IMPLANTED. THE CAUSE OF THE EVENT WAS UNKNOWN. THE PATIENT IS SLOWLY RECOVERING AND THE PUPIL IS GETT…	Lens Retention	Resolved
https://www.accessdata.fda.gov/scripts/cdrh/cfdocs/cfMAUDE/Detail.CFM?MDRFOI__ID=14654881&pc=QCB	2023826-2022-01797	2022-05-06 04:00:00	Injury	STAAR SURGICAL COMPANY	2022-06-10 04:00:00	QCB	IMPLANTABLE COLLAMER LENS (ICL)	Inadequacy of Device Shape and/or Size; Adverse Event Without Identified Device or Use Problem	Intraocular Pressure Increased; Pupillary Block	P030016	NA	1	Event Description: THE REPORTER INDICATED THE SURGEON IMPLANTED A 13.2MM VTICMO13.2 IMPLANTABLE COLLAMER LENS, -13.50/+2.0/107 (SPHERE/CYLINDER/AXIS), INTO THE PATIENTS RIGHT EYE (OD) ON (B)(6) 2022. THE LENS WAS EXPLANTED ON (B)(6) 2022 DUE TO HIGH VAULT AND PUPIL BLOCK WITH ELEVATED INTRAOCULAR PRESSURE (IOP). THE LENS WAS REPLACED WITH A SHORTER LENS AND THE PROBLEM WAS RESOLVED. POST-OP THE I…	Lens Exchange	Resolved
https://www.accessdata.fda.gov/scripts/cdrh/cfdocs/cfMAUDE/Detail.CFM?MDRFOI__ID=14760468&pc=QCB	2023826-2022-01928	2022-05-17 04:00:00	Injury	STAAR SURGICAL COMPANY	2022-06-21 04:00:00	QCB	IMPLANTABLE COLLAMER LENS (ICL)	Inadequacy of Device Shape and/or Size	Intraocular Pressure Increased; Pupillary Block	P030016	NA	1	Event Description: THE REPORTER INDICATED THAT THE SURGEON IMPLANTED A 13.7MM VTICM5_13.7; -9.00/+1.00/101 (SPHERE/CYLINDER/AXIS) IMPLANTABLE COLLAMER LENS INTO THE PATIENT'S RIGHT EYE (OD) ON (B)(6) 2022. THE PATIENT EXPERIENCED EXCESSIVE VAULTING AND PUPIL BLOCK WITH ELEVATED INTRAOCULAR PRESSURE. ON (B)(6) 2022 THE LENS WAS EXCHANGED WITH A SHORTER LENGTH LENS. THE CAUSE OF THE EVENT WAS REPOR…	Lens Exchange	Resolved
https://www.accessdata.fda.gov/scripts/cdrh/cfdocs/cfMAUDE/Detail.CFM?MDRFOI__ID=11042998&pc=QCB	2023826-2020-03085	2020-05-19 04:00:00	Injury	STAAR SURGICAL COMPANY	2020-12-19 05:00:00	QCB	IMPLANTABLE COLLAMER LENS (ICL)	Inadequacy of Device Shape and/or Size	Intraocular Pressure Increased; Pupillary Block; Appropriate Clinical Signs, Symptoms, Conditions Term / Code Not Available	NA	NA	1	Event Description: THE REPORTER INDICATED THAT A 13.2MM, VTICMO13.2,-9.5/1,5/109, IMPLANTABLE COLLAMER LENS WAS IMPLANTED INTO THE PATIENTS RIGHT EYE (OD) ON (B)(6) 2020. THE LENS WAS REMOVED WITHIN THE SAME SURGERY DUE TO LOW VAULT AND PUPIL BLOCK WITH ELEVATED IOP 26MMHG (ASSESSED: (B)(6) 2020). ON (B)(6) 2020 A REPLACEMENT LENS OF LONGER LENGTH WAS IMPLANTED AND THE PROBLEM RESOLVED. Manufactu…	Lens Exchange	Resolved
https://www.accessdata.fda.gov/scripts/cdrh/cfdocs/cfMAUDE/Detail.CFM?MDRFOI__ID=11515299&pc=QCB	2023826-2021-00653	2021-02-24	Injury	STAAR SURGICAL COMPANY	2021-03-18	QCB	IMPLANTABLE COLLAMER LENS (ICL)	Inadequacy of Device Shape and/or Size; Improper or Incorrect Procedure or Method	Intraocular Pressure Increased; Pupillary Block; Appropriate Clinical Signs, Symptoms, Conditions Term / Code Not Available	P030016	NA	1	Event Description: THE REPORTER INDICATED THAT THE SURGEON IMPLANTED A 13.7MM TMICL13.7, -16.00/4.0/065 (SPHERE/CYLINDER/AXIS), IMPLANTABLE COLLAMER LENS INTO THE PATIENT'S LEFT EYE (OS) ON (B)(6) 2021. THE LENS WAS EXCHANGED WITH A FOR A SHORTER LENGTH LENS DUE TO PUBIL BLOCK WITH ELEVATED IOP(34MMHG), ANGLE CLOSURE WITH ELEVATED IOP((34MMHG) ASSESSED ON (B)(6) 2021), AND EXCESSIVE VAULT, ON (B)…	Lens Exchange	Resolved
https://www.accessdata.fda.gov/scripts/cdrh/cfdocs/cfMAUDE/Detail.CFM?MDRFOI__ID=11515298&pc=QCB	2023826-2021-00652	2021-02-24 05:00:00	Injury	STAAR SURGICAL COMPANY	2021-03-18 04:00:00	QCB	IMPLANTABLE COLLAMER LENS (ICL)	Inadequacy of Device Shape and/or Size; Improper or Incorrect Procedure or Method	Intraocular Pressure Increased; Pupillary Block; Appropriate Clinical Signs, Symptoms, Conditions Term / Code Not Available	P030016	NA	1	Event Description: THE REPORTER INDICATED THAT THE SURGEON IMPLANTED A 13.7MM TMICL13.7, -16.00/4.0/125 (SPHERE/CYLINDER/AXIS), IMPLANTABLE COLLAMER LENS INTO THE PATIENT'S RIGHT EYE (OD) ON (B)(6) 2021. THE LENS WAS EXCHANGED WITH A FOR A SHORTER LENGTH LENS DUE TO PUBIL BLOCK WITH ELEVATED IOP(39MMHG), ANGLE CLOSURE WITH ELEVATED IOP(39MMHG) ASSESSED ON (B)(6) 2021, AND EXCESSIVE VAULT, ON (B)(…	Lens Exchange	Resolved
https://www.accessdata.fda.gov/scripts/cdrh/cfdocs/cfMAUDE/Detail.CFM?MDRFOI__ID=12270523&pc=QCB	2023826-2021-03056	2021-07-27 04:00:00	Injury	STAAR SURGICAL COMPANY	2021-08-03 04:00:00	QCB	IMPLANTABLE COLLAMER LENS (ICL)	Inadequacy of Device Shape and/or Size	Intraocular Pressure Increased; Pupillary Block; Appropriate Clinical Signs, Symptoms, Conditions Term / Code Not Available	P030016	NA	1	Event Description: THE REPORTER INDICATED THAT THE SURGEON IMPLANTED A 12.6MM TICM12.6; -14.0/1.0/133 (SPHERE/CYLINDER/AXIS) IMPLANTABLE COLLAMER LENS INTO THE PATIENT'S LEFT EYE (OS) ON (B)(6) 2021. ON (B)(6) 2021 THE LENS WAS EXPLANTED DUE TO EXCESSIVE VAULTING; PUPIL BLOCK WITH ELEVATED INTRAOCULAR PRESSURE; UNREACTIVE (FIXED) PUPIL; AND IT WAS INDICATED THAT ENLARGEMENT OF PI (YAG) WAS PERFOR…	Lens Extraction + Secondary Operation	Unknown
https://www.accessdata.fda.gov/scripts/cdrh/cfdocs/cfMAUDE/Detail.CFM?MDRFOI__ID=12686036&pc=QCB	2023826-2021-04108	2021-09-13 04:00:00	Injury	STAAR SURGICAL COMPANY	2021-10-22 04:00:00	QCB	IMPLANTABLE COLLAMER LENS (ICL)	Inadequacy of Device Shape and/or Size	Intraocular Pressure Increased; Pupillary Block; Appropriate Clinical Signs, Symptoms, Conditions Term / Code Not Available	NA	NA	1	Event Description: THE REPORTER INDICATED THAT A 13.2MM, VTICMO13.2, -13.5/1.0/087 (SPHERE/CYLINDER/AXIS), IMPLANTABLE COLLAMER LENS WAS IMPLANTED INTO THE PATIENTS LEFT EYE (OS) ON (B)(6) 2021. ON (B)(6) 2021 THE LENS WAS EXPLANTED DUE TO EXCESSIVE VAULT, PUPIL BLOCK AND ANGLE CLOSURE WITH ELEVATED IOP. PROBLEM RESOLVED. AT A LATER UNKNOWN DATE "SOME IRIS ATROPHY + 3MM PUPIL" WAS REPORTED. CAUSE…	Lens Exchange + Secondary Operation	Resolved
https://www.accessdata.fda.gov/scripts/cdrh/cfdocs/cfMAUDE/Detail.CFM?MDRFOI__ID=13286583&pc=QCB	2023826-2022-00174	2021-12-22 05:00:00	Injury	STAAR SURGICAL COMPANY	2022-01-18 05:00:00	QCB	IMPLANTABLE COLLAMER LENS (ICL)	Off-Label Use; Inadequacy of Device Shape and/or Size	Intraocular Pressure Increased; Pupillary Block; Appropriate Clinical Signs, Symptoms, Conditions Term / Code Not Available	NA	NA	1	Event Description: THE REPORTER INDICATED THAT THE SURGEON IMPLANTED A 13.2MM TMICL13.2; -7.00/+3.50/100 (SPHERE/ CYLINDER/ AXIS) IMPLANTABLE COLLAMER LENS INTO THE PATIENT'S RIGHT EYE (OD) ON (B)(6) 2021. THE PATIENT EXPERIENCED EXCESSIVE VAULTING; SIGNIFICANT REDUCTION OF IRIDO-CORNEAL ANGLES; ANGLE CLOSURE WITH ELEVATED IOP; MEDICATION WAS PRESCRIBED (DIAMOX); ON (B)(6) 2021 THE LENS WAS EXCHA…	Lens Exchange + Secondary Operation	Not_Resolved
https://www.accessdata.fda.gov/scripts/cdrh/cfdocs/cfMAUDE/Detail.CFM?MDRFOI__ID=15936540&pc=QCB	2023826-2022-04499	2022-09-17 04:00:00	Injury	STAAR SURGICAL COMPANY	2022-12-07 05:00:00	QCB	IMPLANTABLE COLLAMER LENS (ICL)	Inadequacy of Device Shape and/or Size	Intraocular Pressure Increased; Pupillary Block; Appropriate Clinical Signs, Symptoms, Conditions Term / Code Not Available	P030016	NA	1	Event Description: THE REPORTER INDICATED THAT THE SURGEON IMPLANTED A 13.2MM VTICM5_13.2; -14.0/1.5/105 (SPHERE/CYLINDER/AXIS) IMPLANTABLE COLLAMER LENS INTO THE PATIENT'S LEFT EYE (OS) ON (B)(6) 2022. THE PATIENT EXPERIENCED EXCESSIVE VAULTING; SIGNIFICANT REDUCTION OF IRIDO-CORNEAL ANGLES; PUPIL BLOCK WITH ELEVATED INTRAOCULAR PRESSURE; FIXED (UNREACTIVE) PUPIL; ENLARGEMENT OF PI - YAG WHICH W…	Lens Exchange + Secondary Operation	Not_Resolved
https://www.accessdata.fda.gov/scripts/cdrh/cfdocs/cfMAUDE/Detail.CFM?MDRFOI__ID=16142929&pc=QCB	2023826-2023-00098	2022-09-29 04:00:00	Injury	STAAR SURGICAL COMPANY	2023-01-11 05:00:00	QCB	IMPLANTABLE COLLAMER LENS (ICL)	Inadequacy of Device Shape and/or Size	Intraocular Pressure Increased; Pupillary Block; Appropriate Clinical Signs, Symptoms, Conditions Term / Code Not Available	P030016	NA	1	Event Description: THE REPORTER INDICATED THE SURGEON IMPLANTED A 12.6MM VTICM5_12.6 IMPLANTABLE COLLAMER LENS, -14.00/+1.0/090 (SPHERE/CYLINDER/AXIS), INTO THE PATIENTS RIGHT EYE (OD) ON (B)(6) 2022. THE LENS WAS REMOVED ON (B)(6) 2022 DUE TO EXCESSIVE VAULTING, ELEVATED INTRAOCULAR PRESSURE (IOP), PUPIL BLOCK, ANGLE CLOSURE, UNREACTIVE (FIXED) PUPIL AND IRIS ATROPHY. AN ADDITIONAL PI WAS PERFOR…	Lens Exchange + Secondary Operation	Not_Resolved
https://www.accessdata.fda.gov/scripts/cdrh/cfdocs/cfMAUDE/Detail.CFM?MDRFOI__ID=14116256&pc=QCB	2023826-2022-01185	2022-03-15 04:00:00	Injury	STAAR SURGICAL COMPANY	2022-04-14 04:00:00	QCB	IMPLANTABLE COLLAMER LENS (ICL)	Inadequacy of Device Shape and/or Size; Adverse Event Without Identified Device or Use Problem	Intraocular Pressure Increased; Pupillary Block; Appropriate Clinical Signs, Symptoms, Conditions Term / Code Not Available; No Clinical Signs, Symptoms or Conditions	NA	NA	1	Event Description: VAULT WAS REPORTER IN THE RIGHT EYE (OD) OF A PATIENT WITH AN IMPLANTABLE COLLAMER LENS. LENS REMAINS IMPLANTED. IF ADDITIONAL INFORMATION IS RECEIVED A SUPPLEMENTAL MEDWATCH REPORT WILL BE SUBMITTED. Manufacturer Narrative: B5: THE REPORTER INDICATED THAT A 13.2MM, TMICL13.2, -11.0/1.0/128 (SPHERE/CYLINDER/AXIS) IMPLANTABLE COLLAMER LENS WAS IMPLANTED INTO THE PATIENTS RIGHT E…	Lens Extraction + Secondary Operation	Unknown
https://www.accessdata.fda.gov/scripts/cdrh/cfdocs/cfMAUDE/Detail.CFM?MDRFOI__ID=14505054&pc=QCB	2023826-2022-01687	2021-02-27 05:00:00	Injury	STAAR SURGICAL COMPANY	2022-05-26 04:00:00	QCB	IMPLANTABLE COLLAMER LENS (ICL)	Misfocusing	Intraocular Pressure Increased; Pupillary Block; Blurred Vision; Appropriate Clinical Signs, Symptoms, Conditions Term / Code Not Available	P030016	NA	1	Event Description: THE REPORTER INDICATED THAT THE SURGEON IMPLANTED A 13.7MM VTICMO13.7; -11.0/1.5/095 (SPHERE/CYLINDER/AXIS) IMPLANTABLE COLLAMER LENS INTO THE PATIENT'S RIGHT EYE (OD) ON (B)(6) 2021. THE PATIENT EXPERIENCED EXCESSIVE VAULTING; REFRACTIVE SURPRISE; SIGNIFICANT REDUCTION OF IRIDO-CORNEAL ANGLES; PUPIL BLOCK; ANGLE CLOSURE; ELEVATED INTRAOCULAR PRESSURE; UNREACTIVE (FIXED) PUPIL;…	Lens Exchange	Resolved
https://www.accessdata.fda.gov/scripts/cdrh/cfdocs/cfMAUDE/Detail.CFM?MDRFOI__ID=14794474&pc=QCB	2023826-2022-01950	2022-01-18 05:00:00	Injury	STAAR SURGICAL COMPANY	2022-06-23 04:00:00	QCB	IMPLANTABLE COLLAMER LENS (ICL)	Misfocusing	Intraocular Pressure Increased; Pupillary Block; Blurred Vision; Appropriate Clinical Signs, Symptoms, Conditions Term / Code Not Available	P030016	NA	1	Event Description: THE REPORTER INDICATED THAT A 13.2MM, VTICMO13.2, -9.5/1.0/071 (SPHERE/CYLINDER/AXIS), IMPLANTABLE COLLAMER LENS WAS IMPLANTED INTO THE PATIENTS RIGHT EYE (OD) ON (B)(6) 2022. ON (B)(6) 2022 THE LENS WAS EXPLANTED DUE TO TRANSIENT LOSS OF BCVA, PUPIL BLOCK WITH ELEVATED INTRAOCULAR PRESSURE, UNREACTIVE (FIXED) PUPIL, AND IRIS ATROPHY AND THE PROBLEM RESOLVED. CAUSE OF EVENT WAS…	Lens Extraction	Resolved
https://www.accessdata.fda.gov/scripts/cdrh/cfdocs/cfMAUDE/Detail.CFM?MDRFOI__ID=14794499&pc=QCB	2023826-2022-01951	2022-01-18 05:00:00	Injury	STAAR SURGICAL COMPANY	2022-06-23 04:00:00	QCB	IMPLANTABLE COLLAMER LENS (ICL)	Misfocusing	Intraocular Pressure Increased; Pupillary Block; Blurred Vision; Appropriate Clinical Signs, Symptoms, Conditions Term / Code Not Available	P030016	NA	1	Event Description: THE REPORTER INDICATED THAT A 13.2MM, VTICMO13.2, -9.5/1.5/095 (SPHERE/CYLINDER/AXIS), IMPLANTABLE COLLAMER LENS WAS IMPLANTED INTO THE PATIENTS LEFT EYE (OS) ON (B)(6) 2022. ON (B)(6) 2022 THE LENS WAS EXPLANTED DUE TO TRANSIENT LOSS OF BCVA, PUPIL BLOCK WITH ELEVATED INTRAOCULAR PRESSURE, UNREACTIVE (FIXED) PUPIL, AND IRIS ATROPHY. IT WAS REPORTED THAT THE PROBLEM DID NOT RES…	Lens Extraction	Not_Resolved
https://www.accessdata.fda.gov/scripts/cdrh/cfdocs/cfMAUDE/Detail.CFM?MDRFOI__ID=18440465&pc=QCB	2023826-2024-00046	2023-09-06 04:00:00	Injury	STAAR SURGICAL COMPANY	2024-01-03 05:00:00	QCB	IMPLANTABLE COLLAMER LENS (ICL)	Misfocusing; Inadequacy of Device Shape and/or Size; Adverse Event Without Identified Device or Use Problem	Intraocular Pressure Increased; Pupillary Block; Blurred Vision; Appropriate Clinical Signs, Symptoms, Conditions Term / Code Not Available	P030016	NA	1	Event Description: THE REPORTER INDICATED THAT A 13.2MM VTICM5 13.2 IMPLANTABLE COLLAMER LENS OF -9.00/1.0/173 (SPHERE/CYLINDER/AXIS) WAS IMPLANTED INTO THE PATIENT'S RIGHT EYE (OD). ON (B)(6) 2023 THE LENS WAS IMPLANTED AND REMOVED INTRA-OP DUE TO EXCESSIVE VAULT; REFRACTIVE SURPRISE; PUPIL BLOCK WITH ELEVATED IOP; AND ANGLE CLOSURE WITH ELEVATED IOP. ON THE SAME DAY DIFFERENT SURGERY A REPLACEM…	Lens Exchange	Not_Resolved
https://www.accessdata.fda.gov/scripts/cdrh/cfdocs/cfMAUDE/Detail.CFM?MDRFOI__ID=12662188&pc=QCB	2023826-2021-04050	2021-09-12	Injury	STAAR SURGICAL COMPANY	2021-10-19	QCB	IMPLANTABLE COLLAMER LENS (ICL)	Off-Label Use; Inadequacy of Device Shape and/or Size	Intraocular Pressure Increased; Pupillary Block; No Clinical Signs, Symptoms or Conditions	NA	NA	1	Event Description: THE REPORTER INDICATED THAT THE SURGEON IMPLANTED A 13.2MM VTICMO13.2; -12.5/2.5/074 (SPHERE/ CYLINDER/ AXIS) IMPLANTABLE COLLAMER LENS INTO THE PATIENT'S LEFT EYE (OS) ON (B)(6) 2021. ON (B)(6) 2021 THE LENS WAS EXCHANGED WITH A SHORTER LENGTH LENS DUE TO EXCESSIVE VAULTING AND PUPIL BLOCK WITH INTRAOCULAR PRESSURE. THIS RESOLVED THE PROBLEM. THE CAUSE OF THE EVENT WAS REPORTE…	Lens Exchange	Resolved
https://www.accessdata.fda.gov/scripts/cdrh/cfdocs/cfMAUDE/Detail.CFM?MDRFOI__ID=10245039&pc=QCB	2023826-2020-01403	2020-05-15 04:00:00	Injury	STAAR SURGICAL COMPANY	2020-07-08 04:00:00	QCB	IMPLANTABLE COLLAMER LENS (ICL)	Inadequacy of Device Shape and/or Size	Intraocular Pressure Increased; Pupillary Block; No Code Available; Appropriate Clinical Signs, Symptoms, Conditions Term / Code Not Available	N/A	NA	1	Event Description: THE REPORTER INDICATED THAT A 13.2MM, VTICMO13.2, -15.50/2.5/100 (SPHERE/CYLINDER/AXIS), IMPLANTABLE COLLAMER LENS WAS IMPLANTED INTO THE PATIENT'S LEFT EYE (OS) ON (B)(6) 2020. PUPIL BLOCK, ANGLE CLOSURE WITH ELEVATED IOP (34 MMHG) WAS OBSERVED ON (B)(6) 2020. SIGNIFICANT REDUCTION OF ENDOTHELIAL CELL COUNT OR SIGNIFICANT ENDOTHELIAL CELL LOSS (ASSESSED ON (B)(6) 2020), SIGNIF…	Lens Extraction + Secondary Operation	Unknown
https://www.accessdata.fda.gov/scripts/cdrh/cfdocs/cfMAUDE/Detail.CFM?MDRFOI__ID=10245040&pc=QCB	2023826-2020-01402	2020-05-15 04:00:00	Injury	STAAR SURGICAL COMPANY	2020-07-08 04:00:00	QCB	IMPLANTABLE COLLAMER LENS (ICL)	Inadequacy of Device Shape and/or Size	Intraocular Pressure Increased; Pupillary Block; No Code Available; Appropriate Clinical Signs, Symptoms, Conditions Term / Code Not Available	N/A	NA	1	Event Description: THE REPORTER INDICATED THAT A 13.2MM, VTICMO13.2, -18.00/3.0/085 (SPHERE/CYLINDER/AXIS), IMPLANTABLE COLLAMER LENS WAS IMPLANTED INTO THE PATIENT'S RIGHT EYE (OD) ON (B)(6) 2020. PUPIL BLOCK, ANGLE CLOSURE WITH ELEVATED IOP (35 MMHG) WAS OBSERVED ON (B)(6) 2020. SIGNIFICANT REDUCTION OF IRIDO-CORNEAL ANGLES, UNREACTIVE (FIXED) PUPIL, AND EXCESSIVE VAULT WAS OBSERVED. ANTERIOR C…	Lens Extraction + Secondary Operation	Unknown
https://www.accessdata.fda.gov/scripts/cdrh/cfdocs/cfMAUDE/Detail.CFM?MDRFOI__ID=10279904&pc=QCB	2023826-2020-01454	2020-06-23 04:00:00	Injury	STAAR SURGICAL COMPANY	2020-07-15 04:00:00	QCB	IMPLANTABLE COLLAMER LENS (ICL)	Inadequacy of Device Shape and/or Size; Adverse Event Without Identified Device or Use Problem	Intraocular Pressure Increased; Pupillary Block; No Code Available; Appropriate Clinical Signs, Symptoms, Conditions Term / Code Not Available	P030016	NA	1	Event Description: THE REPORTER INDICATED THE SURGEON IMPLANTED A 13.2MM TMICL13.2 IMPLANTABLE COLLAMER LENS, -15.00/+1.0/089 (SPHERE/CYLINDER/AXIS), IN THE PATIENTS LEFT EYE (OS). THE LENS WAS EXPLANTED. ADDITIONAL INFORMATION HAS BEEN REQUESTED BUT NONE HAS BEEN FORTHCOMING. IF ADDITIONAL INFORMATION IS RECEIVED, A SUPPLEMENTAL MEDWATCH WILL BE SUBMITTED. Manufacturer Narrative: ADDITIONAL DATA…	Lens Exchange + Secondary Operation	Resolved
https://www.accessdata.fda.gov/scripts/cdrh/cfdocs/cfMAUDE/Detail.CFM?MDRFOI__ID=15990641&pc=QCB	2023826-2022-04529	2022-10-03 04:00:00	Injury	STAAR SURGICAL COMPANY	2022-12-15 05:00:00	QCB	IMPLANTABLE COLLAMER LENS (ICL)	Adverse Event Without Identified Device or Use Problem	Intraocular Pressure Increased; Pupillary Block; Retinal Detachment; Appropriate Clinical Signs, Symptoms, Conditions Term / Code Not Available	P030016	NA	1	Event Description: THE REPORTER INDICATED THE SURGEON IMPLANTED AN EVO ICL IMPLANTABLE COLLAMER LENS. THE SURGEON REPORTED LATE POSTOPERATIVE PUPILLARY BLOCK WITH FIBRIN OCCLUDING THE PUPIL. THE SURGEON PERFORMED A PI, WHICH RESOLVED THE HIGH IOP. CULTURE OF THE OCCLUSION WAS NEGATIVE AND THE PATIENT DID WELL. THE LENS REMAINED IMPLANTED. ADDITIONAL INFORMATION HAS BEEN REQUESTED BUT NONE HAS BEE…	Lens Retention + Secondary Operation	Resolved
https://www.accessdata.fda.gov/scripts/cdrh/cfdocs/cfMAUDE/Detail.CFM?MDRFOI__ID=10956516&pc=QCB	2023826-2020-02851	2020-11-04 05:00:00	Injury	STAAR SURGICAL COMPANY	2020-12-07 05:00:00	QCB	IMPLANTABLE COLLAMER LENS (ICL)	Misfocusing; Inadequacy of Device Shape and/or Size	Intraocular Pressure Increased; Pupillary Block; Visual Disturbances	P030016	NA	1	Event Description: THE REPORTER INDICATED THAT A 13.2MM, TMICL13.2, IMPLANTABLE COLLAMER LENS WAS IMPLANTED INTO THE PATIENTS LEFT EYE (OS) ON (B)(6) 2020. ON (B)(6) 2020 THE LENS WAS EXPLANTED DUE TO EXCESSIVE VAULT, PUPIL BLOCK WITH ELEVATED IOP, AND BLURRED VISION. ON (B)(6) 2020 THE LENS WAS EXCHANGED AND THE PROBLEM RESOLVED. ON (B)(6) 2020 (LAST VISIT) PATIENTS CURRENT CONDITION WAS BCVA 20…	Lens Exchange	Resolved
https://www.accessdata.fda.gov/scripts/cdrh/cfdocs/cfMAUDE/Detail.CFM?MDRFOI__ID=17432754&pc=QCB	2023826-2023-03243	NA	Injury	STAAR SURGICAL COMPANY	2023-08-01 04:00:00	QCB	IMPLANTABLE COLLAMER LENS (ICL)	Optical Problem	Intraocular Pressure Increased; Red Eye(s); Appropriate Clinical Signs, Symptoms, Conditions Term / Code Not Available	P030016	NA	1	Event Description: THE REPORTER INDICATED THAT THE SURGEON IMPLANTED A 12.1MM VTICM5_12.1; -13.50/+2.5/089 (SPHERE/CYLINDER/AXIS) IMPLANTABLE COLLAMER LENS INTO THE PATIENT'S LEFT EYE (OS) ON (B)(6) 2023. THE PATIENT EXPERIENCED ELEVATED INTRAOCULAR PRESSURE, PIGMENT DISPERSION, GLARES, REDNESS, MEDICATION USED AS WELL AS GONIOSCOPY PERFORMED TO OPEN ANGLES. LENS REMAINS IMPLANTED. IF ADDITIONAL …	Lens Retention	Unknown
https://www.accessdata.fda.gov/scripts/cdrh/cfdocs/cfMAUDE/Detail.CFM?MDRFOI__ID=9039904&pc=QCB	2023826-2019-01703	2019-06-15 04:00:00	Injury	STAAR SURGICAL COMPANY	2019-09-13 04:00:00	QCB	IMPLANTABLE COLLAMER LENS (ICL)	Inadequacy of Device Shape and/or Size; Device Dislodged or Dislocated; Optical Problem	Intraocular Pressure Increased; Retinal Detachment; Blurred Vision; No Code Available	N/A	NA	1	Event Description: THE REPORTER INDICATED THAT A 13.2 VTICMO, -18.00/1.0/091 (SPHERE/CYLINDER/AXIS), IMPLANTABLE COLLAMER LENS WAS IMPLANTED INTO THE PATIENTS LEFT EYE (OS) ON (B)(6) 2019. LOW VAULT WITH ROTATION, ELEVATED IOP, REFRACTIVE SURPRISE, AND RETINA DETACHMENT WAS OBSERVED. SURGICAL INTERVENTION (REPOSITIONING, RETINAL REPAIR AND GAS INFUSION) AND MEDICAL INTERVENTION (ANTIBIOTICS, STER…	Lens Retention + Secondary Operation	Unknown
https://www.accessdata.fda.gov/scripts/cdrh/cfdocs/cfMAUDE/Detail.CFM?MDRFOI__ID=12271368&pc=QCB	2023826-2021-03013	2021-02-08 05:00:00	Injury	STAAR SURGICAL COMPANY	2021-08-03 04:00:00	QCB	IMPLANTABLE COLLAMER LENS (ICL)	Adverse Event Without Identified Device or Use Problem	Intraocular Pressure Increased; UGH (Uveitis Glaucoma Hyphema) Syndrome; Appropriate Clinical Signs, Symptoms, Conditions Term / Code Not Available	P030016	NA	1	Event Description: THE REPORTER INDICATED THE SURGEON IMPLANTED A 13.2MM TMICL13.2 IMPLANTABLE COLLAMER LENS, -14.50/+3.0/072 (SPHERE/CYLINDER/AXIS), INTO THE PATIENTS LEFT EYE (OS) ON (B)(6) 2020. THE LENS WAS EXPLANTED ON (B)(6) 2021 DUE TO UGH SYNDROME CAUSED IRIS ATROPHY AND CONTINUOUS PIGMENT IN THE ANTERIOR CHAMBER. REMOVAL WENT WELL WITHOUT COMPLICATIONS. ADDITIONAL INFORMATION HAS BEEN RE…	Lens Extraction + Secondary Operation	Unknown
https://www.accessdata.fda.gov/scripts/cdrh/cfdocs/cfMAUDE/Detail.CFM?MDRFOI__ID=18378904&pc=QCB	2023826-2023-05715	2023-10-11 04:00:00	Injury	STAAR SURGICAL COMPANY	2023-12-21 05:00:00	QCB	IMPLANTABLE COLLAMER LENS (ICL)	Adverse Event Without Identified Device or Use Problem	Intraocular Pressure Increased; Uveitis; Blurred Vision; Appropriate Clinical Signs, Symptoms, Conditions Term / Code Not Available	P030016	NA	1	Event Description: THE REPORTER INDICATED THAT THE SURGEON IMPLANTED A 12.1MM VTICMO12.1, -9.50/1.50/069 (SPHERE/CYLINDER/AXIS) IMPLANTABLE COLLAMER LENS INTO THE PATIENT'S LEFT EYE (OS) ON (B)(6) 2023. ON (B)(6) 2023 THE LENS WAS EXPLANTED DUE TO ELEVATED INTRAOCULAR PRESSURE, PIGMENT DISPERSION, BLURRED VISOIN AND PROLONGED POSTOPERATIVE ANTERIOR UVEITIS. IT WAS REPORTED THAT THE IOP WAS CONTRO…	Lens Extraction	Resolved
https://www.accessdata.fda.gov/scripts/cdrh/cfdocs/cfMAUDE/Detail.CFM?MDRFOI__ID=9112820&pc=QCB	2023826-2019-01627	2019-04-11 04:00:00	Malfunction	STAAR SURGICAL COMPANY	2019-09-24 04:00:00	QCB	IMPLANTABLE COLLAMER LENS (ICL)	Off-Label Use; Inadequacy of Device Shape and/or Size; Device Dislodged or Dislocated; Optical Problem	Intraocular Pressure Increased; Visual Disturbances; Halo	N/A	NA	1	Event Description: THE REPORTER INDICATED THAT A 12.1MM, VTICH12.1, -8.00/1.5/92 (SPHERE/CYLINDER/AXIS), IMPLANTABLE COLLAMER LENS WAS IMPLANTED INTO THE PATIENTS LEFT EYE (OS) ON (B)(6) 2019. THE LENS WAS REMOVED WITHIN THE SAME SURGERY DUE TO EXCESSIVE VAULT, ELEVATED IOP, LENS DISLOCATION/SUBLUXATION AND GLARE/HALOES. ON (B)(6) 2019 A REPLACEMENT LENS OF SHORTER LENGTH WAS IMPLANTED. IT WAS RE…	Lens Exchange	Resolved
https://www.accessdata.fda.gov/scripts/cdrh/cfdocs/cfMAUDE/Detail.CFM?MDRFOI__ID=10980474&pc=QCB	2023826-2020-02945	2019-03-05 05:00:00	Injury	STAAR SURGICAL COMPANY	2020-12-09 05:00:00	QCB	IMPLANTABLE COLLAMER LENS	Misfocusing; Optical Problem	Intraocular Pressure Increased; Visual Disturbances; Halo; Appropriate Clinical Signs, Symptoms, Conditions Term / Code Not Available	N/A	NA	1	Event Description: REDDIT COMPLAINT: THE PATIENT HAD A 12.6MM VTICM5_12.6 IMPLANTABLE LENS, -12.5/+1.5/090 (SPHERE/CYLINDER/AXIS) IMPLANTED INTO HIS LEFT (OS) EYE. THE PATIENT REPORTS HALOS, DOUBLE VISION, LIGHT RINGS, POSTOP PAIN, PRESSURE, AND VOMITING. REPORTEDLY, THE VOMITING WAS POSSIBLY CAUSED BY THE PATIENT TAKING XANAX PRIOR TO SURGERY. POSTOP PAIN AND PRESSURE RELIEVED BY "PUSHING ONTO T…	Lens Retention + Secondary Operation	Unknown
https://www.accessdata.fda.gov/scripts/cdrh/cfdocs/cfMAUDE/Detail.CFM?MDRFOI__ID=10980487&pc=QCB	2023826-2020-02946	NA	Malfunction	STAAR SURGICAL COMPANY	2020-12-09 05:00:00	QCB	IMPLANTABLE COLLAMER LENS	Misfocusing; Optical Problem	Intraocular Pressure Increased; Visual Disturbances; Halo; Appropriate Clinical Signs, Symptoms, Conditions Term / Code Not Available	N/A	NA	1	Event Description: REDDIT COMPLAINT: THE PATIENT HAD A 12.6MM VTICM5_12.6 IMPLANTABLE LENS, -13.0/+2.0/091 (SPHERE/CYLINDER/AXIS) IMPLANTED INTO HIS RIGHT (OD) EYE. THE PATIENT REPORTS HALOS, LIGHT RINGS, AND POSTOP VOMITING. REPORTEDLY, THE VOMITING WAS POSSIBLY CAUSED BY THE PATIENT TAKING XANAX PRIOR TO SURGERY. Manufacturer Narrative: B5-ADDITIONAL INFO: ELEVATED IOP 6HRS POST-OP DUE TO RETAI…	Unknown	Unknown
https://www.accessdata.fda.gov/scripts/cdrh/cfdocs/cfMAUDE/Detail.CFM?MDRFOI__ID=8671674&pc=QCB	2023826-2019-01020	2019-05-07 04:00:00	Injury	STAAR SURGICAL COMPANY	2019-06-05 04:00:00	QCB	IMPLANTABLE COLLAMER LENS	Device Dislodged or Dislocated	Intraocular Pressure Increased; Visual Disturbances; Halo; No Code Available	N/A	NA	1	Event Description: REFERENCE MFR REPORT# 2023826-2019-00886 FOR INITIAL LENS IMPLANT. THE SURGEON EXCHANGED THE INITIAL IMPLANT WITH A 12.6MM VTICMO12.6 IMPLANTABLE COLLAMER LENS, -15.0/+1.0/013 (SPHERE/CYLINDER/AXIS). THE SURGEON REPORTS LENS ROTATION, HALOS, STARBURST, "COMA DOUBLE IMAGE" AND PATIENT IS ON "SYMBIZA+MONOPROST". Manufacturer Narrative: PRODUCT PROBLEM SHOULD BE CORRECTED TO ADVER…	Lens Retention	Unknown
[truncated: 198 more rows]
