# Supplementary material for: Adverse events associated with Implantable Collamer Lens: insights from the FDA MAUDE database
Source: Front Med (Lausanne). 2025 Jul 21;12:1613060. doi: 10.3389/fmed.2025.1613060 (PMC12319018; doi:10.3389/fmed.2025.1613060)
Supplement: Supplementary file 14 [file Table_13.XLSX]

## Sheet: Lens-related issue-1
Web Address	Report Number	Event Date	Event Type	Manufacturer	Date Received	Product Code...36	Brand Name	Device Problem	Patient Problem	PMA/PMN Number	Exemption Number	Number of Events	Event Text	Management	Outcomes
https://www.accessdata.fda.gov/scripts/cdrh/cfdocs/cfMAUDE/Detail.CFM?MDRFOI__ID=12241293&pc=QCB	2023826-2021-02893	2021-06-28	Injury	STAAR SURGICAL COMPANY	2021-07-28	QCB	IMPLANTABLE COLLAMER LENS (ICL)	Adverse Event Without Identified Device or Use Problem	Capsular Bag Tear	P030016	NA	1	Event Description: THE REPORTER INDICATED THE SURGEON WAS PREPARING TO IMPLANT A 12.1MM TMICL12.1 IMPLANTABLE COLLAMER LENS, -13.00/+2.0/076 (SPHERE/CYLINDER/AXIS), INTO THE PATIENTS RIGHT EYE (OD) ON (B)(6) 2021 AND THE LENS CAPSULE WAS NICKED DURING THE PRIMARY INCISION POINT. THE ICL LENS WAS IMPLANTED AND REMAINED IMPLANTED. ADDITIONAL INFORMATION HAS BEEN REQUESTED BUT NONE HAS BEEN FORTHCOM…	Lens Retention	Unknown
https://www.accessdata.fda.gov/scripts/cdrh/cfdocs/cfMAUDE/Detail.CFM?MDRFOI__ID=17292528&pc=QCB	2023826-2023-02649	2023-04-18 04:00:00	Injury	STAAR SURGICAL COMPANY	2023-07-10 04:00:00	QCB	IMPLANTABLE COLLAMER LENS (ICL)	Off-Label Use; Adverse Event Without Identified Device or Use Problem	Capsular Bag Tear	P030016	NA	1	Event Description: THE REPORTER INDICATED THE SURGEON INSERTED AND REMOVED A 12.6MM VTICMO12.6 IMPLANTABLE COLLAMER LENS, -18.00/+1.5/176 (SPHERE/CYLINDER/AXIS), DURING THE SAME SURGERY DUE TO THE ANTERIOR CAPSULE RUPTURED AT THE TIME THE MAIN INCISION WAS MADE. PHACOEMULSIFICATION (CATARACT SURGERY) WAS PERFORMED AND AN IOL WAS IMPLANTED. THE PROBLEM WAS RESOLVED. THE CAUSE OF THE EVENT WAS UNKN…	Lens Extraction + Secondary Operation	Resolved
https://www.accessdata.fda.gov/scripts/cdrh/cfdocs/cfMAUDE/Detail.CFM?MDRFOI__ID=10247584&pc=QCB	2023826-2020-01427	2020-04-09 04:00:00	Injury	STAAR SURGICAL COMPANY	2020-07-08 04:00:00	QCB	IMPLANTABLE COLLAMER LENS (ICL)	Off-Label Use; Adverse Event Without Identified Device or Use Problem	Cataract	NA	NA	1	Event Description: THE REPORTER INDICATED THE SURGEON INSERTED AND REMOVED A 12.6MM VTICM5_12.6 IMPLANTABLE COLLAMER LENS, -13.00/+1.0/073 (SPHERE/CYLINDER/AXIS), WITHIN THE SAME SURGERY DUE TO THE LENS TORE DURING DELIVERY INTO THE PATIENTS LEFT EYE (OS). WHEN THE LENS WAS REMOVED, THE LENS CONTACTED THE CRYSTALLINE LENS AND A MILD ANTERIOR SUBCAPSULAR OPACITY DEVELOPED. THE SURGEON IMPLANTED AN…	Lens Exchange	Resolved
https://www.accessdata.fda.gov/scripts/cdrh/cfdocs/cfMAUDE/Detail.CFM?MDRFOI__ID=11014526&pc=QCB	2023826-2020-02985	2020-04-06 04:00:00	Injury	STAAR SURGICAL COMPANY	2020-12-15 05:00:00	QCB	IMPLANTABLE COLLAMER LENS (ICL)	Off-Label Use; Adverse Event Without Identified Device or Use Problem	Cataract	N/A	NA	1	Event Description: THE REPORTER INDICATED THE SURGEON IMPLANTED A 12.1MM VTICMO12.1 IMPLANTABLE COLLAMER LENS, -08.50/+1.0/095 (SPHERE/CYLINDER/AXIS), IN THE PATIENTS RIGHT EYE (OD), ON (B)(6) 2020. THE LENS WAS EXPLANTED ON (B)(6) 2020 DUE TO LENS OPACITY (ANTERIOR SUBCAPSULAR) WAS OBSERVED. ANOTHER ICL LENS HAS NOT BEEN IMPLANTED. THE CAUSE OF THE EVENT WAS UNKNOWN. Manufacturer Narrative: ADDI…	Lens Extraction	Unknown
https://www.accessdata.fda.gov/scripts/cdrh/cfdocs/cfMAUDE/Detail.CFM?MDRFOI__ID=10990261&pc=QCB	2023826-2020-02963	2020-05-14 04:00:00	Injury	STAAR SURGICAL COMPANY	2020-12-11 05:00:00	QCB	IMPLANTABLE COLLAMER LENS (ICL)	Off-Label Use; Inadequacy of Device Shape and/or Size	Cataract	NA	NA	1	Event Description: THE REPORTER INDICATED THAT A 12.6MM, VTICMO12.6, -15.0/3.5/091 (SPHERE/CYLINDER/AXIS), IMPLANTABLE COLLAMER LENS WAS IMPLANTED INTO THE PATIENTS RIGHT EYE (OD) ON (B)(6) 2020. THE LENS WAS REMOVED WITHIN THE SAME SURGERY DUE TO LOW VAULT AND LENS OPACITY ASC (OBSERVED: (B)(6) 2020). ON (B)(6) 2020 A REPLACEMENT LENS OF LONGER LENGTH WAS IMPLANTED AND THE PROBLEM RESOLVED. Manu…	Lens Exchange	Resolved
https://www.accessdata.fda.gov/scripts/cdrh/cfdocs/cfMAUDE/Detail.CFM?MDRFOI__ID=11894548&pc=QCB	2023826-2021-01709	2021-04-22 04:00:00	Injury	STAAR SURGICAL COMPANY	2021-05-27 04:00:00	QCB	IMPLANTABLE COLLAMER LENS	Adverse Event Without Identified Device or Use Problem	Cataract	P030016	NA	1	Event Description: THE REPORTER STATES A 12.6MM TMICL12.6 IMPLANTABLE COLLAMER LENS -12.0/+1.5/109 (SPHERE/CYLINDER/AXIS) WAS IMPLANTED INTO THE PATIENT'S RIGHT (OD) EYE ON (B)(6) 2021. ON (B)(6) 2021 THE LENS WAS EXPLANTED DUE TO A POSTERIOR SUBCAPSULAR CATARACT. PHACO-EMULSIFICATION (CATARACT SURGERY) AND IOL IMPLANTATION WAS PERFORMED. MODERATE CORNEAL EDEMA AND MODERATE ANTERIOR CHAMBER CELL …	Lens Extraction + Secondary Operation	Resolved
https://www.accessdata.fda.gov/scripts/cdrh/cfdocs/cfMAUDE/Detail.CFM?MDRFOI__ID=11986324&pc=QCB	2023826-2021-01855	2021-04-08 04:00:00	Injury	STAAR SURGICAL COMPANY	2021-06-11 04:00:00	QCB	IMPLANTABLE COLLAMER LENS (ICL)	Off-Label Use; Adverse Event Without Identified Device or Use Problem	Cataract	NA	NA	1	Event Description: THE REPORTER INDICATED THAT THE SURGEON IMPLANTED A 12.1MM VTICMO12.1 IMPLANTABLE COLLAMER LENS, -6.0/+1.5/079 (SPHERE/CYLINDER/AXIS), INTO THE PATIENT'S RIGHT EYE (OD) ON (B)(6)2021. ON (B)(6) 2021 THE LENS WAS EXPLANTED DUE TO LENS OPACITY-ASC. PHACO-EMULSIFICATION AND IOL IMPLANTATION WAS PERFORMED. THE SURGEON REPORTS THIS WAS AN ICL-INDUCED CATARACT. Manufacturer Narrative…	Lens Extraction + Secondary Operation	Resolved
https://www.accessdata.fda.gov/scripts/cdrh/cfdocs/cfMAUDE/Detail.CFM?MDRFOI__ID=12021151&pc=QCB	2023826-2021-01906	2021-02-01	Injury	STAAR SURGICAL COMPANY	2021-06-17	QCB	IMPLANTABLE COLLAMER LENS (ICL)	Off-Label Use; Adverse Event Without Identified Device or Use Problem	Cataract	NA	NA	1	Event Description: THE REPORTER INDICATED THAT A 12.6MM, VTICMO12.6, -9.5/1.0/85 (SPHERE/CYLINDER/AXIS), IMPLANTABLE COLLAMER LENS WAS IMPLANTED INTO THE PATIENTS LEFT EYE (OS) ON (B)(6) 2020. ON (B)(6) 2021 THE LENS WAS EXPLANTED DUE TO LENS OPACITY (ASC). IT WAS REPORTED THAT THIS EXPLANT RESOLVED THE PROBLEM. CAUSE OF EVENT WAS UNKNOWN. Manufacturer Narrative: WEIGHT: UNK. ETHNICITY: UNK. RACE…	Lens Extraction	Resolved
https://www.accessdata.fda.gov/scripts/cdrh/cfdocs/cfMAUDE/Detail.CFM?MDRFOI__ID=12064338&pc=QCB	2023826-2021-02028	2021-05-26	Injury	STAAR SURGICAL COMPANY	2021-06-24	QCB	IMPLANTABLE COLLAMER LENS (ICL)	Adverse Event Without Identified Device or Use Problem	Cataract	P030016	NA	1	Event Description: THE REPORTER STATED THAT A 13.2MM, TMICL13.2, -10.0/1.0/111 (SPHERE/CYLINDER/AXIS) IMPLANTABLE COLLAMER LENS WAS IMPLANTED INTO THE PATIENTS RIGHT EYE (OD) ON (B)(6) 2021. LENS OPACITY WAS OBSERVED. LENS REMAINS IMPLANTED. THE REPORTER STATED THAT PATIENT IS HAPPY WITH VISION AND THE SURGEON IS NOT TREATING IT AT THE TIME. IF ADDITIONAL INFORMATION IS RECEIVED A SUPPLEMENTAL ME…	Lens Retention	Unknown
https://www.accessdata.fda.gov/scripts/cdrh/cfdocs/cfMAUDE/Detail.CFM?MDRFOI__ID=12872840&pc=QCB	2023826-2021-04560	2021-04-11 04:00:00	Injury	STAAR SURGICAL COMPANY	2021-11-24 05:00:00	QCB	IMPLANTABLE COLLAMER LENS (ICL)	Adverse Event Without Identified Device or Use Problem	Cataract	NA	NA	1	Event Description: THE REPORTER INDICATED THAT THE SURGEON IMPLANTED A 13.2MM TMICL13.2; -11.5/1.5/051 (SPHERE/CYLINDER/AXIS) IMPLANTABLE COLLAMER LENS INTO THE PATIENT'S LEFT EYE (OS) ON (B)(6) 2019. ON (B)(6) 2021 THE LENS WAS EXPLANTED DUE TO SUBCAPSULAR CATARACT (ASC) WHICH WAS OBSERVED ON (B)(6) 2021. THIS RESOLVED THE PROBLEM. CAUSE OF THE EVENT WAS REPORTED AS UNKNOWN. Manufacturer Narrati…	Lens Extraction	Resolved
https://www.accessdata.fda.gov/scripts/cdrh/cfdocs/cfMAUDE/Detail.CFM?MDRFOI__ID=12957841&pc=QCB	2023826-2021-04691	2021-11-04 04:00:00	Injury	STAAR SURGICAL COMPANY	2021-12-07 05:00:00	QCB	IMPLANTABLE COLLAMER LENS (ICL)	Adverse Event Without Identified Device or Use Problem	Cataract	NA	NA	1	Event Description: THE REPORTER INDICATED THAT THE SURGEON IMPLANTED A 13.2MM TMICL13.2; -11.00/1.0/129 (SPHERE/CYLINDER/AXIS) IMPLANTABLE COLLAMER LENS INTO THE PATIENT'S RIGHT EYE (OD) ON (B)(6) 2021. THE PATIENT EXPERIENCED ANTERIOR SUBCAPSULAR CATARACT GRADE 1 (ASC). LENS REMAINS IMPLANTED. Manufacturer Narrative: ADDITIONAL INFORMATION: B5 - IT WAS LATER REPORTED THAT THE LENS WAS EXPLANTED …	Lens Extraction	Resolved
https://www.accessdata.fda.gov/scripts/cdrh/cfdocs/cfMAUDE/Detail.CFM?MDRFOI__ID=13082661&pc=QCB	2023826-2021-04920	NA	Injury	STAAR SURGICAL COMPANY	2021-12-23 05:00:00	QCB	IMPLANTABLE COLLAMER LENS (ICL)	Adverse Event Without Identified Device or Use Problem	Cataract	P030016	NA	1	Event Description: THE REPORTER INDICATED THE SURGEON IMPLANTED A 12.1MM TMICL12.1 IMPLANTABLE COLLAMER LENS, -07.00/+1.0/092 (SPHERE/CYLINDER/AXIS), INTO THE PATIENTS LEFT EYE (OS) ON (B)(6) 2021. IT WAS REPORTED AT ONE WEEK POST-OP, A SMALL ANTERIOR CATARACT WAS OBSERVED. THE PATIENT IS 20/15 OU AND SO FAR THE CATARACT IS A NON ISSUE. THE LENS REMAINED IMPLANTED AND THE PATIENT WILL BE MONITORE…	Lens Retention	Unknown
https://www.accessdata.fda.gov/scripts/cdrh/cfdocs/cfMAUDE/Detail.CFM?MDRFOI__ID=14197863&pc=QCB	2023826-2022-01310	2021-07-01 04:00:00	Injury	STAAR SURGICAL COMPANY	2022-04-25 04:00:00	QCB	IMPLANTABLE COLLAMER LENS (ICL)	Off-Label Use; Adverse Event Without Identified Device or Use Problem	Cataract	NA	NA	1	Event Description: THE REPORTER INDICATED THAT THE SURGEON IMPLANTED A 12.0MM TICM12.0; -10.0/1.5/77 (SPHERE/CYLINDER/AXIS) IMPLANTABLE COLLAMER LENS INTO THE PATIENT'S LEFT EYE (OS) ON (B)(6)2013. THE SURGEON REPORTS OPACITY - NS CATARACT WHICH WAS OBSERVED ON (B)(6) 2021. ALSO ON THIS DATE THE LENS WAS EXPLANTED AND REPLACED WITH ANOTHER IOL. THIS RESOLVED THE PROBLEM. THE CAUSE OF THE EVENT WA…	Lens Exchange	Resolved
https://www.accessdata.fda.gov/scripts/cdrh/cfdocs/cfMAUDE/Detail.CFM?MDRFOI__ID=15506297&pc=QCB	2023826-2022-03329	2022-06-28 04:00:00	Injury	STAAR SURGICAL COMPANY	2022-09-29 04:00:00	QCB	IMPLANTABLE COLLAMER LENS (ICL)	Off-Label Use; Inadequacy of Device Shape and/or Size; Adverse Event Without Identified Device or Use Problem	Cataract	P030016	NA	1	Event Description: THE REPORTER INDICATED THE SURGEON IMPLANTED A 12.6MM TMICL12.6 IMPLANTABLE COLLAMER LENS, -10.00/+1.0/016 (SPHERE/CYLINDER/AXIS), IN THE PATIENTS EYE ON (B)(6) 2021. THE LENS WAS EXPLANTED ON (B)(6) 2022 DUE TO A CATARACT DEVELOPED. THE LENS WAS REPLACED WITH AN IOL. ADDITIONAL INFORMATION HAS BEEN REQUESTED BUT NONE HAS BEEN FORTHCOMING. Manufacturer Narrative: H3 - DEVICE EV…	Lens Extraction + Secondary Operation	Resolved
https://www.accessdata.fda.gov/scripts/cdrh/cfdocs/cfMAUDE/Detail.CFM?MDRFOI__ID=15679254&pc=QCB	2023826-2022-03845	2022-08-15 04:00:00	Injury	STAAR SURGICAL COMPANY	2022-10-27 04:00:00	QCB	IMPLANTABLE COLLAMER LENS (ICL)	Adverse Event Without Identified Device or Use Problem	Cataract	P030016	NA	1	Event Description: THE REPORTER INDICATED THAT A 12.6MM TMICL12.6 -12.5/2.5/109 (SPHERE/CYLINDER/AXIS) IMPLANTABLE COLLAMER LENS WAS IMPLANTED INTO THE PATIENTS RIGHT EYE (OD) ON (B)(6) 2020. ON (B)(6) 2022 LENS OPACITY (ASC) WAS OBSERVED. IT WAS REPORTED THAT ON (B)(6) 2022 CATARACT SURGERY (PHACOEMULSIFICATION) WAS PERFORMED AND AN IOL WAS IMPLANTED. PROBLEM RESOLVED. IN THE REPORTER OPINION TH…	Lens Extraction + Secondary Operation	Resolved
https://www.accessdata.fda.gov/scripts/cdrh/cfdocs/cfMAUDE/Detail.CFM?MDRFOI__ID=15679288&pc=QCB	2023826-2022-03846	2022-08-15 04:00:00	Injury	STAAR SURGICAL COMPANY	2022-10-27 04:00:00	QCB	IMPLANTABLE COLLAMER LENS (ICL)	Adverse Event Without Identified Device or Use Problem	Cataract	P030016	NA	1	Event Description: THE REPORTER INDICATED THAT A 12.6MM TMICL12.6 -12.0/3.0/109 (SPHERE/CYLINDER/AXIS) IMPLANTABLE COLLAMER LENS WAS IMPLANTED INTO THE PATIENTS LEFT EYE (OS) ON (B)(6) 2020. ON (B)(6) 2022 LENS OPACITY (ASC) WAS OBSERVED. IT WAS REPORTED THAT ON (B)(6) 2022 CATARACT SURGERY (PHACOEMULSIFICATION) WAS PERFORMED AND AN IOL WAS IMPLANTED. PROBLEM RESOLVED. IN THE REPORTER OPINION THE…	Lens Extraction + Secondary Operation	Resolved
https://www.accessdata.fda.gov/scripts/cdrh/cfdocs/cfMAUDE/Detail.CFM?MDRFOI__ID=16018250&pc=QCB	2023826-2022-04428	2022-11-03 04:00:00	Injury	STAAR SURGICAL COMPANY	2022-12-20 05:00:00	QCB	IMPLANTABLE COLLAMER LENS (ICL)	Inadequacy of Device Shape and/or Size	Cataract	P030016	NA	1	Event Description: THE REPORTER INDICATED THAT A 12.1MM TMICL 12.1 IMPLANTABLE COLLAMER LENS OF -13.5/1.5/105 (SPHERE/CYLINDER/AXIS) WAS IMPLANTED INTO THE PATIENTS RIGHT EYE (OD) ON (B)(6) 2021 . LOW VAULT WITH LENS OPACITY (CATARACT) ASC WAS REPORTED. THE LENS WAS REMOVED ON (B)(6) 2022 AND ON THE SAME DAY BUT DIFFERENT SURGERY A REPLACEMENT LENS OF DIFFERENT MODEL AND LONGER LENGTH WAS IMPLANT…	Lens Exchange	Not_Resolved
https://www.accessdata.fda.gov/scripts/cdrh/cfdocs/cfMAUDE/Detail.CFM?MDRFOI__ID=16345841&pc=QCB	2023826-2023-00483	2022-12-15 05:00:00	Injury	STAAR SURGICAL COMPANY	2023-02-10 05:00:00	QCB	IMPLANTABLE COLLAMER LENS (ICL)	Off-Label Use	Cataract	P030016	NA	1	Event Description: THE REPORTER INDICATED THAT A 13.2MM VTICMO 13.2 IMPLANTABLE COLLAMER LENS OF -18.00/3.0/117 (SPHERE/CYLINDER/AXIS) WAS IMPLANTED INTO THE PATIENTS RIGHT EYE (OD) ON (B)(6) 2022. ON (B)(6) 2022 THE LENS WAS REMOVED DUE TO LENS OPACITY (CATARACT); ANTERIOR SUBCAPSULAR CATARACTS (ASC). PHACOEMULSIFICATION WAS DONE AND THE PROBLEM WAS RESOLVED. CAUSE REPORTED AS DEVICE. "LENS TOUC…	Lens Extraction + Secondary Operation	Resolved
https://www.accessdata.fda.gov/scripts/cdrh/cfdocs/cfMAUDE/Detail.CFM?MDRFOI__ID=16526528&pc=QCB	2023826-2023-00873	2023-01-30 05:00:00	Injury	STAAR SURGICAL COMPANY	2023-03-10 05:00:00	QCB	IMPLANTABLE COLLAMER LENS (ICL)	Off-Label Use; Adverse Event Without Identified Device or Use Problem	Cataract	P030016	NA	1	Event Description: THE REPORTER INDICATED THAT A 12.6MM, VTICMO12.6 -11.0/1.0/110 (SPHERE/CYLINDER/AXIS), IMPLANTABLE COLLAMER LENS WAS IMPLANTED INTO THE PATIENTS LEFT EYE (OS) ON (B)(6) 2023. IT WAS REPORTED THAT LENS OPACITY (ASC) WAS OBSERVED ON THE SAME DATE OF SURGERY, THE LENS WAS IMPLANTED AND REMOVED INTRAOPERATIVELY AND THE PROBLEM RESOLVED. IN THE REPORTER OPINION USER ERROR WAS THE CA…	Lens Extraction	Resolved
https://www.accessdata.fda.gov/scripts/cdrh/cfdocs/cfMAUDE/Detail.CFM?MDRFOI__ID=16541830&pc=QCB	2023826-2023-00855	2023-02-03 05:00:00	Injury	STAAR SURGICAL COMPANY	2023-03-14 04:00:00	QCB	IMPLANTABLE COLLAMER LENS (ICL)	Off-Label Use; Inadequacy of Device Shape and/or Size	Cataract	P030016	NA	1	Event Description: THE REPORTER INDICATED THE SURGEON IMPLANTED A 13.2MM VTICMO13.2 IMPLANTABLE COLLAMER LENS, -11.00/+2.0/088 (SPHERE/CYLINDER/AXIS), IN THE PATIENTS LEFT EYE (OS), ON (B)(6) 2023. THE LENS WAS EXPLANTED ON (B)(6) 2023 DUE TO LOW VAULTING AND AN ANTERIOR SUBCAPSULAR CATARACT (ASC) HAD DEVELOPED. THE PROBLEM WAS RESOLVED. THE CAUSE OF THE EVENT WAS UNKNOWN. Manufacturer Narrative:…	Lens Extraction	Resolved
https://www.accessdata.fda.gov/scripts/cdrh/cfdocs/cfMAUDE/Detail.CFM?MDRFOI__ID=16545625&pc=QCB	2023826-2023-00856	2023-02-03 05:00:00	Injury	STAAR SURGICAL COMPANY	2023-03-15 04:00:00	QCB	IMPLANTABLE COLLAMER LENS (ICL)	Off-Label Use; Inadequacy of Device Shape and/or Size	Cataract	P030016	NA	1	Event Description: THE REPORTER INDICATED THE SURGEON IMPLANTED A 13.2MM VTICMO13.2 IMPLANTABLE COLLAMER LENS, -12.00/+1.5/095 (SPHERE/CYLINDER/AXIS), IN THE PATIENTS RIGHT EYE (OD), ON (B)(6) 2023. THE LENS WAS EXPLANTED ON (B)(6) 2023 DUE TO LOW VAULTING AND AN ANTERIOR SUBCAPSULAR CATARACT (ASC) HAD DEVELOPED. THE PROBLEM WAS RESOLVED. THE CAUSE OF THE EVENT WAS UNKNOWN. Manufacturer Narrative…	Lens Extraction	Resolved
https://www.accessdata.fda.gov/scripts/cdrh/cfdocs/cfMAUDE/Detail.CFM?MDRFOI__ID=16569934&pc=QCB	2023826-2023-00972	2022-09-20 04:00:00	Injury	STAAR SURGICAL COMPANY	2023-03-18 04:00:00	QCB	IMPLANTABLE COLLAMER LENS (ICL)	Off-Label Use; Inadequacy of Device Shape and/or Size	Cataract	P030016	NA	1	Event Description: THE REPORTER INDICATED THAT THE SURGEON IMPLANTED A 12.6MM VTICMO12.6; -9.0/0.5/083 (SPHERE/CYLINDER/AXIS) IMPLANTABLE COLLAMER LENS INTO THE PATIENT'S RIGHT EYE (OD) ON (B)(6) 2021. THE PATIENT EXPERIENCED LOW VAULTING; AND LENS OPACITY (ASC) THAT WAS OBSERVED ON (B)(6) 2022. ON (B)(6) 2022 THE LENS WAS EXPLANTED. ON (B)(6) 2022 A REPLACEMENT LENS OF A DIFFERENT MODEL AND LENG…	Lens Exchange	Resolved
https://www.accessdata.fda.gov/scripts/cdrh/cfdocs/cfMAUDE/Detail.CFM?MDRFOI__ID=16694265&pc=QCB	2023826-2023-01299	2023-01-17 05:00:00	Injury	STAAR SURGICAL COMPANY	2023-04-06 04:00:00	QCB	IMPLANTABLE COLLAMER LENS (ICL)	Adverse Event Without Identified Device or Use Problem	Cataract	P030016	NA	1	Event Description: THE REPORTER INDICATED THAT THE SURGEON IMPLANTED A 13.7MM VTICM5_13.7; -12.0/+1.5/17 (SPHERE/CYLINDER/AXIS) IMPLANTABLE COLLAMER LENS INTO THE PATIENT'S LEFT EYE (OS) ON (B)(6) 2023 AS A REPLACEMENT LENS. IT WAS INDICATED THAT THE PATIENT EXPERIENCED SUBCAPSULAR OPACITY. ON (B)(6) 2023 THE LENS WAS EXPLANTED. THIS RESOLVED THE PROBLEM. THE CAUSE OF THE EVENT WAS REPORTED AS UN…	Lens Extraction	Resolved
https://www.accessdata.fda.gov/scripts/cdrh/cfdocs/cfMAUDE/Detail.CFM?MDRFOI__ID=16770068&pc=QCB	2023826-2023-01385	2023-03-03 05:00:00	Injury	STAAR SURGICAL COMPANY	2023-04-19 04:00:00	QCB	IMPLANTABLE COLLAMER LENS (ICL)	Off-Label Use; Adverse Event Without Identified Device or Use Problem	Cataract	P030016	NA	1	Event Description: THE REPORTER INDICATED THE SURGEON IMPLANTED A 13,2MM VTICMO13.2 IMPLANTABLE COLLAMER LENS, -18.00/+3.5/090 (SPHERE/CYLINDER/AXIS), IN THE PATIENTS RIGHT EYE (OD), ON (B)(6) 2023. THE LENS WAS EXPLANTED ON (B)(6) 2023 DUE TO AN ANTERIOR SUBCAPSULAR OPACITY (CATARACT) WAS OBSERVED ON (B)(6) 2023. THE PROBLEM WAS RESOLVED. THE CAUSE OF THE EVENT WAS UNKNOWN. Manufacturer Narrativ…	Lens Extraction	Resolved
https://www.accessdata.fda.gov/scripts/cdrh/cfdocs/cfMAUDE/Detail.CFM?MDRFOI__ID=16791232&pc=QCB	2023826-2023-01444	2023-02-13 05:00:00	Injury	STAAR SURGICAL COMPANY	2023-04-21 04:00:00	QCB	IMPLANTABLE COLLAMER LENS (ICL)	Off-Label Use; Inadequacy of Device Shape and/or Size	Cataract	P030016	NA	1	Event Description: THE REPORTER INDICATED THAT A 12.6MM, VTICMO12.1 -8.0/2.5/110 (SPHERE/CYLINDER/AXIS), IMPLANTABLE COLLAMER LENS WAS IMPLANTED INTO THE PATIENTS LEFT EYE (OS) ON (B)(6) 2022. LOW VAULT AND LENS OPACITY WAS OBSERVED. ON (B)(6) 2023 THE LENS WAS EXPLANTED AND IT WAS REPORTED THAT THE PROBLEM RESOLVED. CAUSE OF EVENT WAS UNKNOWN. Manufacturer Narrative: H6- DEVICE EVALUATION: LENS …	Lens Extraction	Resolved
https://www.accessdata.fda.gov/scripts/cdrh/cfdocs/cfMAUDE/Detail.CFM?MDRFOI__ID=16791528&pc=QCB	2023826-2023-01445	2023-02-13 05:00:00	Injury	STAAR SURGICAL COMPANY	2023-04-21 04:00:00	QCB	IMPLANTABLE COLLAMER LENS (ICL)	Off-Label Use; Inadequacy of Device Shape and/or Size	Cataract	P030016	NA	1	Event Description: THE REPORTER INDICATED THAT A 12.6MM, VTICMO12.6 -7.0/1.5/076 (SPHERE/CYLINDER/AXIS), IMPLANTABLE COLLAMER LENS WAS IMPLANTED INTO THE PATIENTS RIGHT EYE (OD) ON (B)(6) 2022. LOW VAULT AND LENS OPACITY WAS OBSERVED. ON 13-FEB-2023 THE LENS WAS EXPLANTED AND IT WAS REPORTED THAT THE PROBLEM RESOLVED. CAUSE OF EVENT WAS UNKNOWN. Manufacturer Narrative: H6: DEVICE EVALUATION: LENS…	Lens Extraction	Resolved
https://www.accessdata.fda.gov/scripts/cdrh/cfdocs/cfMAUDE/Detail.CFM?MDRFOI__ID=16989892&pc=QCB	2023826-2023-01992	2023-03-24 04:00:00	Injury	STAAR SURGICAL COMPANY	2023-05-23 04:00:00	QCB	IMPLANTABLE COLLAMER LENS (ICL)	Adverse Event Without Identified Device or Use Problem	Cataract	P030016	NA	1	Event Description: THE REPORTER INDICATED THAT A 12.1MM, VTICM5_12.1 -10.50/1.00/112 (SPHERE/CYLINDER/AXIS), IMPLANTABLE COLLAMER LENS WAS IMPLANTED INTO THE PATIENTS RIGHT EYE (OD) ON (B)(6) 2021. LENS OPACITY (CORTICAL) WAS OBSERVED ON (B)(6) 2021. ON (B)(6) 2023 THE LENS WAS EXPLANTED. IT WAS REPORTED THAT CATARACT SURGERY WAS ALSO PERFORMED. PROBLEM RESOLVED. CAUSE OF EVENT WAS UNKNOWN. Manuf…	Lens Extraction + Secondary Operation	Resolved
https://www.accessdata.fda.gov/scripts/cdrh/cfdocs/cfMAUDE/Detail.CFM?MDRFOI__ID=17226939&pc=QCB	2023826-2023-02566	2023-01-02 05:00:00	Injury	STAAR SURGICAL COMPANY	2023-06-29 04:00:00	QCB	IMPLANTABLE COLLAMER LENS (ICL)	Inadequacy of Device Shape and/or Size	Cataract	P030016	NA	1	Event Description: THE REPORTER INDICATED THAT A 12.6MM VTICM5_12.6 IMPLANTABLE COLLAMER LENS OF -12.50/2.0/052 (SPHERE / CYLINDER / AXIS) WAS IMPLANTED INTO THE PATIENT'S LEFT EYE (OS) ON (B)(6) 2022. ON (B)(6) 2023 THE LENS WAS EXPLANTED DUE TO LOW VAULT AND LENS OPACITY (OBSERVED: ON (B)(6) 2023) AND THE PROBLEM RESOLVED. IT WAS REPORTED THAT AN IOL WAS IMPLANTED AND PATIENT IS HAPPY. IN THE R…	Lens Extraction + Secondary Operation	Resolved
https://www.accessdata.fda.gov/scripts/cdrh/cfdocs/cfMAUDE/Detail.CFM?MDRFOI__ID=17263291&pc=QCB	2023826-2023-02664	2023-04-09 04:00:00	Injury	STAAR SURGICAL COMPANY	2023-07-05 04:00:00	QCB	IMPLANTABLE COLLAMER LENS (ICL)	Misfocusing	Cataract	P030016	NA	1	Event Description: THE REPORTER INDICATED THAT A 12.6MM VTICMO12.6 IMPLANTABLE COLLAMER LENS OF -12.0/2.5/092 (SPHERE/CYLINDER/AXIS) WAS IMPLANTED INTO THE PATIENT'S RIGHT EYE (OD) ON (B)(6) 2022. ON (B)(6) 2023, ASC LENS OPACITY WAS OBSERVED AND THE LENS WAS REMOVED. THE PROBLEM WAS RESOLVED. THE CAUSE OF THE EVENT IS UNKNOWN. Manufacturer Narrative: H6: WORK ORDER SEARCH: NO SIMILAR COMPLAINTS …	Lens Extraction	Resolved
https://www.accessdata.fda.gov/scripts/cdrh/cfdocs/cfMAUDE/Detail.CFM?MDRFOI__ID=17308923&pc=QCB	2023826-2023-02762	NA	Injury	STAAR SURGICAL COMPANY	2023-07-12 04:00:00	QCB	IMPLANTABLE COLLAMER LENS (ICL)	Misfocusing	Cataract	P030016	NA	1	Event Description: THE REPORTER INDICATED THAT A 12.6MM VTICM512.6 IMPLANTABLE COLLAMER LENS OF -13.0/0.5/97 (SPHERE/CYLINDER/AXIS) WAS IMPLANTED INTO THE PATIENT'S LEFT EYE (OS) ON (B)(6) 2022. ON (B)(6) 2023, THE LENS WAS REMOVED DUE TO LENS OPACITY, ASC THAT WAS OBSERVED IN (B)(6) 2023. CAUSE OF THE EVENT IS UNKNOWN. REPORTEDLY, "SURGEON TOLD: LENS OPACITY WAS NOT PRODUCT RELATED." THE PROBLEM…	Lens Extraction + Secondary Operation	Resolved
https://www.accessdata.fda.gov/scripts/cdrh/cfdocs/cfMAUDE/Detail.CFM?MDRFOI__ID=17342578&pc=QCB	2023826-2023-02887	2023-04-08 04:00:00	Injury	STAAR SURGICAL COMPANY	2023-07-18 04:00:00	QCB	IMPLANTABLE COLLAMER LENS (ICL)	Off-Label Use; Adverse Event Without Identified Device or Use Problem	Cataract	P030016	NA	1	Event Description: THE REPORTER INDICATED THE SURGEON IMPLANTED A 12.6MM VTICMO12.6 IMPLANTABLE COLLAMER LENS, -16.00/+1.0/019 (SPHERE/CYLINDER/AXIS), IN THE PATIENTS LEFT EYE (OS), ON (B)(6) 2023. THE LENS WAS EXPLANTED ON (B)(6) 2023 DUE TO AN ANTERIOR SUBCAPSULAR (ASC) OPACITY (CATARACT) WAS NOTED ON (B)(6) 2023. THE PROBLEM WAS RESOLVED. THE CAUSE OF THE EVENT WAS UNKNOWN. Manufacturer Narrat…	Lens Extraction	Resolved
https://www.accessdata.fda.gov/scripts/cdrh/cfdocs/cfMAUDE/Detail.CFM?MDRFOI__ID=17595282&pc=QCB	2023826-2023-03530	NA	Injury	STAAR SURGICAL COMPANY	2023-08-22 04:00:00	QCB	IMPLANTABLE COLLAMER LENS (ICL)	Adverse Event Without Identified Device or Use Problem	Cataract	P030016	NA	1	Event Description: THE REPORTER INDICATED THAT CATARACTS WAS OBSERVED IN PATIENT. LENS WAS IMPLANTED IN 2021. ADDITIONAL INFORMATION HAS BEEN REQUESTED BUT NONE HAS BEEN FORTHCOMING.Event Description: THE REPORTER INDICATED THAT A 13.2MM, TMICL13.2, -11.0/1.0/075 (SPHERE/CYLINDER/AXIS), IMPLANTABLE COLLAMER LENS WAS IMPLANTED INTO THE PATIENT'S RIGHT EYE (OD). LENS OPACITY (CATARACT) ASC WAS OBSE…	Lens Retention	Unknown
https://www.accessdata.fda.gov/scripts/cdrh/cfdocs/cfMAUDE/Detail.CFM?MDRFOI__ID=18007848&pc=QCB	2023826-2023-04808	NA	Injury	STAAR SURGICAL COMPANY	2023-10-25 04:00:00	QCB	IMPLANTABLE COLLAMER LENS (ICL)	Adverse Event Without Identified Device or Use Problem	Cataract	P030016	NA	1	Event Description: THE REPORTER INDICATED THAT THE SURGEON IMPLANTED A 13.2MM VTICM5_13.2; -10.50/+2.50/111 (SPHERE/CYLINDER/AXIS) IMPLANTABLE COLLAMER LENS INTO THE PATIENT'S RIGHT EYE (OD) ON (B)(6) 2023. THE PATIENT EXPERIENCED LENS OPACITY (CORTICAL) ASSESSED ON (B)(6) 2023. ON (B)(6) 2023 THE LENS WAS EXPLANTED AND REPLACED WITH A CATARACT LENS. THE PROBLEM WAS RESOLVED. THE CAUSE OF THE EVE…	Lens Extraction + Secondary Operation	Resolved
https://www.accessdata.fda.gov/scripts/cdrh/cfdocs/cfMAUDE/Detail.CFM?MDRFOI__ID=18268802&pc=QCB	2023826-2023-05293	NA	Injury	STAAR SURGICAL COMPANY	2023-12-05 05:00:00	QCB	IMPLANTABLE COLLAMER LENS (ICL)	Adverse Event Without Identified Device or Use Problem	Cataract	P030016	NA	1	Event Description: THE REPORTER INDICATED THE SURGEON IMPLANTED A 12.6MM VTICM5_12.6 IMPLANTABLE COLLAMER LENS, -10.50/+1.0/131 (SPHERE/CYLINDER/AXIS), INTO THE PATIENTS EYE. THE LENS WAS EXPLANTED DUE TO THE DEVELOPMENT OF AN ANTERIOR CHAMBER CATARACT. ADDITIONAL INFORMATION HAS BEEN REQUESTED BUT NONE HAS BEEN FORTHCOMING. Manufacturer Narrative: H6 - WORK ORDER SEARCH: NO SIMILAR COMPLAINT WAS…	Lens Extraction	Unknown
https://www.accessdata.fda.gov/scripts/cdrh/cfdocs/cfMAUDE/Detail.CFM?MDRFOI__ID=18419826&pc=QCB	2023826-2023-05835	2023-12-08 05:00:00	Injury	STAAR SURGICAL COMPANY	2023-12-29 05:00:00	QCB	IMPLANTABLE COLLAMER LENS (ICL)	Adverse Event Without Identified Device or Use Problem	Cataract	P030016	NA	1	Event Description: THE REPORTER INDICATED THAT A 12.1MM VTICMO12.1 IMPLANTABLE COLLAMER LENS OF -0.00/2.5/086 (SPHERE/CYLINDER/AXIS) WAS IMPLANTED INTO THE PATIENT'S RIGHT EYE (OD) ON (B)(6) 2017. ON (B)(6)2023 THE LENS WAS EXPLANTED DUE TO LENS OPACITY. PROBLEM RESOLVED. IT WAS REPORTED THAT CATARACT SURGERY AND IOL IMPLANTATION WAS PERFORMED AND THE PATIENT IS HAPPY. Manufacturer Narrative: H6 …	Lens Extraction + Secondary Operation	Resolved
https://www.accessdata.fda.gov/scripts/cdrh/cfdocs/cfMAUDE/Detail.CFM?MDRFOI__ID=9960156&pc=QCB	2023826-2020-00852	2020-11-19 05:00:00	Injury	STAAR SURGICAL COMPANY	2020-04-14 04:00:00	QCB	IMPLANTABLE COLLAMER LENS (ICL)	Adverse Event Without Identified Device or Use Problem	Cataract; Appropriate Clinical Signs, Symptoms, Conditions Term / Code Not Available	P030016	NA	1	Event Description: THE REPORTER INDICATED THAT THE SURGEON IMPLANTED AN IMPLANTABLE COLLAMER LENS (ICL) INTO THE PATIENT'S LEFT (OS) EYE. REPORTEDLY, THE PATIENT DEVELOPED PSC CATARACTS ON (B)(6) 2019 THAT APPEARED TO RESOLVE BY (B)(6) 2019. THE CATARACT REAPPEARED IN (B)(6) 2019. Manufacturer Narrative: ADDITIONAL INFORMATION: H6 TYPE OF INVESTIGATION- ANALYSIS OF PRODUCTION RECORDS (B)(4): DEVI…	Lens Extraction + Secondary Operation	Resolved
https://www.accessdata.fda.gov/scripts/cdrh/cfdocs/cfMAUDE/Detail.CFM?MDRFOI__ID=12437079&pc=QCB	2023826-2021-03475	2021-06-30 04:00:00	Injury	STAAR SURGICAL COMPANY	2021-09-07 04:00:00	QCB	IMPLANTABLE COLLAMER LENS (ICL)	Misfocusing; Adverse Event Without Identified Device or Use Problem	Cataract; Blurred Vision	P030016	NA	1	Event Description: THE REPORTER INDICATED THE SURGEON IMPLANTED A 13.2MM VTICM5_13.2 IMPLANTABLE COLLAMER LENS, -11.00/+1.0/044 (SPHERE/CYLINDER/AXIS), INTO THE PATIENTS EYE AND THE PATIENT DEVELOPED A CATARACT. THE LENS REMAINED IMPLANTED. ADDITIONAL INFORMATION HAS BEEN REQUESTED BUT NONE HAS BEEN FORTHCOMING. Manufacturer Narrative: B5: THE LENS WAS IMPLANTED INTO THE PATIENTS LEFT EYE (OS) ON…	Lens Extraction + Secondary Operation	Resolved
https://www.accessdata.fda.gov/scripts/cdrh/cfdocs/cfMAUDE/Detail.CFM?MDRFOI__ID=12840495&pc=QCB	2023826-2021-04372	2021-06-30 04:00:00	Injury	STAAR SURGICAL COMPANY	2021-11-18 05:00:00	QCB	IMPLANTABLE COLLAMER LENS (ICL)	Misfocusing; Inadequacy of Device Shape and/or Size	Cataract; Blurred Vision	N/A	NA	1	Event Description: THE REPORTER INDICATED THAT THE SURGEON IMPLANTED A 13.2MM VTICM5_13.2 IMPLANTABLE COLLAMER LENS, -11.0/+1.0/103 (SPHERE/CYLINDER/AXIS) INTO THE PATIENT'S RIGHT EYE (OD) ON (B)(6)2021. ON (B)(6) 2021 THE LENS WAS EXPLANTED DUE TO LOW VAULT, LENS OPACITY-ASC, AND VISION LOSS.THE CAUSE OF THE EVENT IS REPORTED AS DEVICE: "SIZE ERROR, OCOS CALCULATION." REPORTEDLY, THE PROBLEM WAS…	Lens Extraction	Not_Resolved
https://www.accessdata.fda.gov/scripts/cdrh/cfdocs/cfMAUDE/Detail.CFM?MDRFOI__ID=13146115&pc=QCB	2023826-2021-04373	2021-06-30 04:00:00	Injury	STAAR SURGICAL COMPANY	2022-01-03 05:00:00	QCB	IMPLANTABLE COLLAMER LENS (ICL)	Misfocusing; Inadequacy of Device Shape and/or Size	Cataract; Blurred Vision	N/A	NA	1	Event Description: THE REPORTER INDICATED THAT THE SURGEON IMPLANTED A 13.2MM VTICM5_13.2 IMPLANTABLE COLLAMER LENS, -12.5/+1.5/077 (SPHERE/CYLINDER/AXIS) INTO THE PATIENT'S LEFT EYE (OS) ON (B)(6) 2021. ON (B)(6) 2021 THE LENS WAS EXPLANTED DUE TO LOW VAULT, LENS OPACITY-ASC, AND VISION LOSS. THE CAUSE OF THE EVENT IS REPORTED AS DEVICE: "SIZE ERROR, OCOS CALCULATION." REPORTEDLY, THE PROBLEM WA…	Lens Extraction	Not_Resolved
https://www.accessdata.fda.gov/scripts/cdrh/cfdocs/cfMAUDE/Detail.CFM?MDRFOI__ID=15578068&pc=QCB	2023826-2022-03617	2022-09-26 04:00:00	Injury	STAAR SURGICAL COMPANY	2022-10-11 04:00:00	QCB	IMPLANTABLE COLLAMER LENS (ICL)	Misfocusing	Cataract; Blurred Vision	P030016	NA	1	Event Description: THE REPORTER INDICATED THAT THE SURGEON IMPLANTED A 13.7MM VTICM5_13.7; -3.0/1.50/064 (SPHERE/CYLINDER/AXIS) IMPLANTABLE COLLAMER LENS INTO THE PATIENT'S LEFT EYE (OS) ON (B)(6) 2022. THE PATIENT EXPERIENCED REFRACTIVE SURPRISE. ON (B)(6) 2022 THE LENS WAS EXPLANTED AND IT INDICATED THE PATIENT WILL BE MEASURED AGAIN IN A FEW MONTHS; THE INITIAL REFRACTIVE MUST BE RE-DETERMINED…	Lens Extraction + Secondary Operation	Resolved
https://www.accessdata.fda.gov/scripts/cdrh/cfdocs/cfMAUDE/Detail.CFM?MDRFOI__ID=16018251&pc=QCB	2023826-2022-04429	2022-11-03 04:00:00	Injury	STAAR SURGICAL COMPANY	2022-12-20 05:00:00	QCB	IMPLANTABLE COLLAMER LENS (ICL)	Misfocusing; Inadequacy of Device Shape and/or Size	Cataract; Blurred Vision	P030016	NA	1	Event Description: THE REPORTER INDICATED THAT A 12.1MM TMICL 12.1 IMPLANTABLE COLLAMER LENS OF -17.0/2.5/070 (SPHERE/CYLINDER/AXIS) WAS IMPLANTED INTO THE PATIENTS LEFT EYE (OS) ON (B)(6) 2021. LOW VAULT; PERMANENT LOSS OF BCVA AND LENS OPACITY (CATARACT) ASC WAS REPORTED. ON (B)(6) 2022 THE LENS WAS EXCHANGED FOR A LONGER LENGTH LENS AND THE PROBLEM WAS NOT RESOLVED. CAUSE REPORTED AS DEVICE; U…	Lens Exchange	Not_Resolved
https://www.accessdata.fda.gov/scripts/cdrh/cfdocs/cfMAUDE/Detail.CFM?MDRFOI__ID=17547301&pc=QCB	2023826-2023-03523	2023-03-22 04:00:00	Injury	STAAR SURGICAL COMPANY	2023-08-14 04:00:00	QCB	IMPLANTABLE COLLAMER LENS (ICL)	Misfocusing	Cataract; Blurred Vision	P030016	NA	1	Event Description: THE REPORTER INDICATED THAT A 12.1MM TMICL12.1 IMPLANTABLE COLLAMER LENS OF -12.5/1.0/051 9SPHERE/CYLINDER/AXIS) WAS IMPLANTED INTO THE PATIENT'S LEFT EYE (OS) ON (B)(6) 2023. ON (B)(6) 2023 THE LENS WAS EXPLANTED DUE TO REFRACTIVE SURPRISE AND LENS OPACITY. IT WAS REPORTED THAT REFRACTIVE TREATMENT AND PHACO-EMULSIFICATION WITH IOL IMPLANTATION WAS PERFORMED AND THE PROBLEM RE…	Lens Extraction + Secondary Operation	Resolved
https://www.accessdata.fda.gov/scripts/cdrh/cfdocs/cfMAUDE/Detail.CFM?MDRFOI__ID=17741313&pc=QCB	2023826-2023-04041	NA	Injury	STAAR SURGICAL COMPANY	2023-09-13 04:00:00	QCB	IMPLANTABLE COLLAMER LENS (ICL)	Misfocusing; Unintended Movement	Cataract; Blurred Vision	P030016	NA	1	Event Description: THE REPORTER INDICATED THAT THE SURGEON IMPLANTED A 12.6MM VTICM5_12.6, -2.00/+0.50/153 (SPHERE/CYLINDER/AXIS) IMPLANTABLE COLLAMER LENS INTO THE PATIENT'S LEFT EYE (OS) ON (B)(6) 2023. THE LENS WAS IMPLANTED UPSIDE DOWN AND THE PATIENT HAD BLURRY VISION. ON (B)(6) 2023 THE LENS WAS EXPLANTED AND REPOSITIONED AND IMPLANTED THE CORRECT WAY. THE CAUSE OF THE EVENT WAS REPORTED AS…	Lens Repositioning	Not_Resolved
https://www.accessdata.fda.gov/scripts/cdrh/cfdocs/cfMAUDE/Detail.CFM?MDRFOI__ID=16019193&pc=QCB	2023826-2022-04657	2022-11-16 05:00:00	Malfunction	STAAR SURGICAL COMPANY	2022-12-20 05:00:00	QCB	IMPLANTABLE COLLAMER LENS (ICL)	Inadequacy of Device Shape and/or Size; Device Dislodged or Dislocated	Cataract; Blurred Vision; Appropriate Clinical Signs, Symptoms, Conditions Term / Code Not Available	P030016	NA	1	Event Description: THE REPORTER INDICATED THAT A 12.6MM VTICMO 12.6 IMPLANTABLE COLLAMER LENS OF -17.0/2.5/086 (SPHERE/CYLINDER/AXIS) WAS IMPLANTED INTO THE PATIENTS LEFT EYE (OS) ON (B)(6) 2022 AS AN EXCHANGE LENS. IT IS REPORTED THAT "THE ICL HAS LOW VAULT WITH SIGNIFICANT INFERIOR DECENTRATION AND CCW ROTATION. DESPITE REPLACING ICL WITH ONE STEP LARGER SIZED ICL THE VAULT REMAINS SHALLOW AND …	Lens Retention	Unknown
https://www.accessdata.fda.gov/scripts/cdrh/cfdocs/cfMAUDE/Detail.CFM?MDRFOI__ID=16688954&pc=QCB	2023826-2023-01202	2022-12-19 05:00:00	Injury	STAAR SURGICAL COMPANY	2023-04-06 04:00:00	QCB	IMPLANTABLE COLLAMER LENS (ICL)	Adverse Event Without Identified Device or Use Problem	Cataract; Blurred Vision; Appropriate Clinical Signs, Symptoms, Conditions Term / Code Not Available	P030016	NA	1	Event Description: THE REPORTER INDICATED THAT A 13.2MM, VTICM5_13.2, -11.5/2.5/84(SPHERE/CYLINDER/AXIS), IMPLANTABLE COLLAMER LENS WAS IMPLANTED INTO THE PATIENTS LEFT EYE (OS) ON (B)(6) 2022. ON (B)(6) 2022 THE LENS WAS EXPLANTED DUE TO LENS OPACITY (ASSESSED: (B)(6) 2022), PIGMENT DISPERSION, UNREACTIVE (FIXED) PUPIL AND BLURRED VISION AND THE PROBLEM RESOLVED. THE REPORTER STATED THAT ON (B)(…	Lens Extraction	Resolved
https://www.accessdata.fda.gov/scripts/cdrh/cfdocs/cfMAUDE/Detail.CFM?MDRFOI__ID=16678146&pc=QCB	2023826-2023-01164	2023-02-22 05:00:00	Injury	STAAR SURGICAL COMPANY	2023-04-04 04:00:00	QCB	IMPLANTABLE COLLAMER LENS (ICL)	Misfocusing; Inadequacy of Device Shape and/or Size	Cataract; Blurred Vision; Discomfort; Appropriate Clinical Signs, Symptoms, Conditions Term / Code Not Available	P030016	NA	1	Event Description: THE REPORTER INDICATED THE SURGEON IMPLANTED AN ICL IMPLANTABLE COLLAMER LENS, INTO THE PATIENTS RIGHT EYE (OD) ON (B)(6) 2023. A CATARACT WAS OBSERVED AND THE PATIENT COMPLAINED OF DISCOMFORT, BLURRED VISION AND DIFFICULTY READING VA. THE LENS REMAINED IMPLANTED BUT THE PLAN WAS TO REMOVE THE LENS. ADDITIONAL INFORMATION HAS BEEN REQUESTED BUT NONE HAS BEEN FORTHCOMING. Manufa…	Lens Extraction	Unknown
https://www.accessdata.fda.gov/scripts/cdrh/cfdocs/cfMAUDE/Detail.CFM?MDRFOI__ID=16692052&pc=QCB	2023826-2023-01165	2023-02-22 05:00:00	Injury	STAAR SURGICAL COMPANY	2023-04-06 04:00:00	QCB	IMPLANTABLE COLLAMER LENS (ICL)	Misfocusing; Inadequacy of Device Shape and/or Size	Cataract; Blurred Vision; Discomfort; Appropriate Clinical Signs, Symptoms, Conditions Term / Code Not Available	P030016	NA	1	Event Description: THE REPORTER INDICATED THE SURGEON IMPLANTED AN ICL IMPLANTABLE COLLAMER LENS, INTO THE PATIENTS LEFT EYE (OS) ON (B)(6) 2023. A CATARACT WAS OBSERVED AND THE PATIENT COMPLAINED OF DISCOMFORT, BLURRED VISION AND DIFFICULTY READING VA. THE LENS REMAINED IMPLANTED BUT THE PLAN WAS TO REMOVE THE LENS. ADDITIONAL INFORMATION HAS BEEN REQUESTED BUT NONE HAS BEEN FORTHCOMING. Manufac…	Lens Extraction	Unknown
https://www.accessdata.fda.gov/scripts/cdrh/cfdocs/cfMAUDE/Detail.CFM?MDRFOI__ID=17610615&pc=QCB	2023826-2023-03705	NA	Injury	STAAR SURGICAL COMPANY	2023-08-24 04:00:00	QCB	IMPLANTABLE COLLAMER LENS (ICL)	Misfocusing; Adverse Event Without Identified Device or Use Problem	Cataract; Blurred Vision; No Clinical Signs, Symptoms or Conditions	P030016	NA	1	Event Description: THE REPORTER INDICATED THAT A 13.2MM, TMICL13.2, -11.0/1.0/075 (SPHERE/CYLINDER/AXIS), IMPLANTABLE COLLAMER LENS WAS IMPLANTED INTO THE PATIENT'S LEFT EYE (OS). LENS OPACITY (CATARACT) ASC WAS OBSERVED ON (B)(6) 2023. LENS REMAINS IMPLANTED. REPORTEDLY, PATIENT IS TRAILING A SCL FOR THE REFRACTIVE SHIFT AND WILL REFER CATARACT SURGERY FOR NOW. Manufacturer Narrative: CORRECTED …	Lens Retention	Unknown
https://www.accessdata.fda.gov/scripts/cdrh/cfdocs/cfMAUDE/Detail.CFM?MDRFOI__ID=8611928&pc=QCB	2023826-2019-00824	2019-02-27 05:00:00	Injury	STAAR SURGICAL COMPANY	2019-05-15 04:00:00	QCB	IMPLANTABLE COLLAMER LENS (ICL)	Misfocusing; Off-Label Use	Cataract; Blurred Vision; No Code Available	P030016	NA	1	Event Description: THE REPORTER INDICATED THAT A 13.2MM, TMICL13.2, -5.50/2.5/160 (SPHERE/CYLINDER/AXIS), IMPLANTABLE COLLAMER LENS WAS IMPLANTED INTO THE PATIENT'S RIGHT EYE (OD) ON (B)(6) 2019. LOSS OF BCVA, LENS OPACITY (ASC), SIGNIFICANT REDUCTION OF ENDOTHELIAL CELL COUNT OR SIGNIFICANT ENDOTHELIAL CELL LOSS, AND BLURRED VISION WAS OBSERVED. THE LENS WAS REMOVED ON (B)(6) 2019. PHACOEMULSIFI…	Lens Extraction + Secondary Operation	Resolved
https://www.accessdata.fda.gov/scripts/cdrh/cfdocs/cfMAUDE/Detail.CFM?MDRFOI__ID=8611958&pc=QCB	2023826-2019-00791	2019-02-24 05:00:00	Injury	STAAR SURGICAL COMPANY	2019-05-15 04:00:00	QCB	IMPLANTABLE COLLAMER LENS (ICL)	Misfocusing	Cataract; Blurred Vision; No Code Available	N/A	NA	1	Event Description: THE REPORTER INDICATED THAT THE SURGEON IMPLANTED A 12.6MM VTICM5_12.6, -4.50/0.5/150 (SPHERE/CYLINDER/AXIS) , IMPLANTABLE COLLAMER LENS INTO THE PATIENT'S LEFT EYE (OS) ON (B)(6) 2019. LOSS OF BCVA, BLURRED VISION, AND REFRACTIVE CHANGE OVERTIME WAS OBSERVED. THE LENS WAS REMOVED ON (B)(6) 2019. CAUSE OF THE EVENT IS REPORTED AS UNKNOWN. PHACOEMULSIFICATION (CATARACT SURGERY) …	Lens Extraction + Secondary Operation	Unknown
https://www.accessdata.fda.gov/scripts/cdrh/cfdocs/cfMAUDE/Detail.CFM?MDRFOI__ID=9936253&pc=QCB	2023826-2020-00745	2020-03-12 04:00:00	Injury	STAAR SURGICAL COMPANY	2020-04-08 04:00:00	QCB	IMPLANTABLE COLLAMER LENS (ICL)	Misfocusing	Cataract; Blurred Vision; No Code Available	P030016	NA	1	Event Description: THE REPORTER INDICATED THAT THE SURGEON IMPLANTED A 12.6MM TMICL12.6 LENS, -8.0/+2.5/087 (SPHERE/CYLINDER/AXIS) INTO THE PATIENT'S RIGHT (OD) EYE ON (B)(6) 2019. ON (B)(6) 2020 THE LENS WAS EXPLANTED DUE TO LENS OPACITY PSC CORTICAL. TRANSIENT LOSS OF BCVA IS ALSO REPORTED. REPORTEDLY, THE PATIENT DEVELOPED PSC CATARACTS ON (B)(6) 2019 THAT APPEARED TO RESOLVE BY (B)(6) 2019. T…	Lens Extraction + Secondary Operation	Resolved
https://www.accessdata.fda.gov/scripts/cdrh/cfdocs/cfMAUDE/Detail.CFM?MDRFOI__ID=10476134&pc=QCB	2023826-2020-01935	2020-07-10 04:00:00	Injury	STAAR SURGICAL COMPANY	2020-09-01 04:00:00	QCB	IMPLANTABLE COLLAMER LENS (ICL)	Misfocusing; Adverse Event Without Identified Device or Use Problem	Cataract; Blurred Vision; No Code Available	NA	NA	1	Event Description: THE REPORTER INDICATED THE SURGEON IMPLANTED A 12.1MM VTICM5_12.1 IMPLANTABLE COLLAMER LENS, -11.00/+2.0/086 (SPHERE/CYLINDER/AXIS), IN THE PATIENT'S RIGHT EYE (OD), ON (B)(6) 2020. THE LENS WAS EXPLANTED ON (B)(6) 2020 DUE TO THE DEVELOPMENT OF AN ANTERIOR SUBCAPSULAR OPACITY AND BLURRED VISION. CATARACT SURGERY WAS PERFORMED AND AN IOL WAS IMPLANTED. SEE MFR REPORT # 2023826-…	Lens Extraction + Secondary Operation	Unknown
https://www.accessdata.fda.gov/scripts/cdrh/cfdocs/cfMAUDE/Detail.CFM?MDRFOI__ID=16904423&pc=QCB	2023826-2023-01686	2022-07-12 04:00:00	Injury	STAAR SURGICAL COMPANY	2023-05-10 04:00:00	QCB	IMPLANTABLE COLLAMER LENS (ICL)	Misfocusing; Off-Label Use; Optical Problem	Cataract; Blurred Vision; Visual Disturbances; Halo; Appropriate Clinical Signs, Symptoms, Conditions Term / Code Not Available	P030016	NA	1	Event Description: THE REPORTER INDICATED THE SURGEON IMPLANTED A 12.6MM VTICM5_12.6 IMPLANTABLE COLLAMER LENS, -10.50/+1.5/088 (SPHERE/CYLINDER/AXIS), INTO THE PATIENTS LEFT EYE (OS) ON (B)(6) 2022. THE LENS WAS REMOVED ON (B)(6) 2023 DUE TO LENS OPACITY (CATARACT, ANTERIOR SUBCAPSULAR) WAS OBSERVED ON (B)(6) 2022. THERE WAS PIGMENT DISPERSION AND THE PATIENT COMPLAINED OF BLURRED VISION AND GLA…	Lens Extraction	Resolved
https://www.accessdata.fda.gov/scripts/cdrh/cfdocs/cfMAUDE/Detail.CFM?MDRFOI__ID=10706991&pc=QCB	2023826-2020-02407	2020-09-15	Injury	STAAR SURGICAL COMPANY	2020-10-20	QCB	IMPLANTABLE COLLAMER LENS (ICL)	Adverse Event Without Identified Device or Use Problem	Cataract; Capsular Bag Tear	P030016	NA	1	Event Description: THE REPORTER INDICATED THE SURGEON INSERTED AND REMOVED A 13.2MM TMICL13.2 IMPLANTABLE COLLAMER LENS, -13.00/+3.5/094 (SPHERE/CYLINDER/AXIS), DURING THE SAME SURGERY, DUE TO AN ANTERIOR SUBCAPSULAR OPACITY AND A CAPSULAR TEAR HAD OCCURRED. CATARACT SURGERY WAS PERFORMED AND AN IOL LENS WAS IMPLANTED IN THE CILIARY SULCUS. THE REPORTER INDICATED THE CAUSE OF THE EVENT WAS DUE TO…	Lens Extraction + Secondary Operation	Unknown
https://www.accessdata.fda.gov/scripts/cdrh/cfdocs/cfMAUDE/Detail.CFM?MDRFOI__ID=8970000&pc=QCB	2023826-2019-01541	2019-07-31 04:00:00	Injury	STAAR SURGICAL COMPANY	2019-09-06 04:00:00	QCB	IMPLANTABLE COLLAMER LENS (ICL)	Off-Label Use; Inadequacy of Device Shape and/or Size; Improper or Incorrect Procedure or Method	Cataract; Corneal Edema; Intraocular Pressure Increased; No Code Available	N/A	NA	1	Event Description: THE REPORTER INDICATED THAT A 12.6MM, VTICMO12.6, -12.50/3.0/093 (SPHERE/CYLINDER/AXIS), IMPLANTABLE COLLAMER LENS WAS IMPLANTED INTO THE PATIENT'S RIGHT EYE (OD) ON (B)(6) 2019. ANGLE CLOSURE WITH ELEVATED IOP (26 MMHG) AND LOW VAULT WERE ASSESSED ON (B)(6) 2019. EYE STATUS ON (B)(6) 2019, "AC QUIET WITH MINIMAL CORNEAL EDEMA. NEAR VA J8." LENS REMAINS IMPLANTED. Manufacturer …	Lens Exchange	Resolved
https://www.accessdata.fda.gov/scripts/cdrh/cfdocs/cfMAUDE/Detail.CFM?MDRFOI__ID=9874226&pc=QCB	2023826-2020-00634	2020-02-21 05:00:00	Injury	STAAR SURGICAL COMPANY	2020-03-24 04:00:00	QCB	IMPLANTABLE COLLAMER LENS (ICL)	Misfocusing; Adverse Event Without Identified Device or Use Problem	Cataract; Inflammation; Intraocular Pressure Increased; Blurred Vision; No Code Available	N/A	NA	1	Event Description: THE REPORTER INDICATED THAT A 13.2MM, VTICM5_13.2, -11.50/+2.0/95 (SPHERE/CYLINDER/AXIS) IMPLANTABLE COLLAMER LENS WAS IMPLANTED INTO THE PATIENTS LEFT EYE (OS) ON (B)(6) 2020. PIGMENT DISPERSION, UNREACTIVE (FIXED) PUPIL, BLURRED VISION, IRIS ATROPHY, LENS OPACITY ASC AND PUPIL BLOCK WERE OBSERVED. SECONDARY SURGICAL INTERVENTION (YAG AND ANTERIOR CHAMBER IRRIGATION) AND MEDIC…	Lens Retention + Secondary Operation	Unknown
https://www.accessdata.fda.gov/scripts/cdrh/cfdocs/cfMAUDE/Detail.CFM?MDRFOI__ID=9107370&pc=QCB	2023826-2019-01751	2019-05-30 04:00:00	Injury	STAAR SURGICAL COMPANY	2019-09-23 04:00:00	QCB	IMPLANTABLE COLLAMER LENS (ICL)	Adverse Event Without Identified Device or Use Problem; Unintended Movement	Cataract; Inflammation; Intraocular Pressure Increased; Pain; Visual Disturbances; No Code Available	NA	NA	1	Event Description: THE REPORTER INDICATED THE SURGEON IMPLANTED A 12.1MM VTICMO12.1 IMPLANTABLE COLLAMER LENS -18.00/+1.0/177 (SPHERE/CYLINDER/AXIS) IN THE PATIENTS RIGHT EYE (OD) ON (B)(6) 2019. A COUPLE OF HOURS AFTER THE INITIAL SURGERY, THE PATIENT EXPERIENCED PAIN AND A NEGATIVE EFFECT ON HER VISION. A CATARACT HAD DEVELOPED. THE LENS WILL BE EXPLANTED BUT TO DATE REMAINS IMPLANTED. ADDITION…	Lens Retention	Unknown
https://www.accessdata.fda.gov/scripts/cdrh/cfdocs/cfMAUDE/Detail.CFM?MDRFOI__ID=16261376&pc=QCB	2023826-2023-00326	2022-12-15 05:00:00	Injury	STAAR SURGICAL COMPANY	2023-01-28 05:00:00	QCB	IMPLANTABLE COLLAMER LENS (ICL)	Misfocusing; Improper or Incorrect Procedure or Method	Cataract; Intraocular Pressure Increased; Blurred Vision; Appropriate Clinical Signs, Symptoms, Conditions Term / Code Not Available	P030016	NA	1	Event Description: THE REPORTER (PATIENT CURRENT OBSERVING DOCTOR) STATES THAT A SURGEON AT A DIFFERENT CLINIC IMPLANTED A 13.7MM VTICMO 3.7 IMPLANTABLE COLLAMER LENS OF -7.00/0.5/085 (SPHERE/CYLINDER/AXIS) WAS IMPLANTED INTO THE PATIENTS RIGHT EYE (OD) ON (B)(6) 2022. THE CURRENT OBSERVING DOCTOR SAW PATIENT FOR THE FIRST TIME ON (B)(6) 2022, WHERE HE UNFORTUNATELY BECAME AWARE OF SEVERAL MEDICA…	Unknown	Unknown
https://www.accessdata.fda.gov/scripts/cdrh/cfdocs/cfMAUDE/Detail.CFM?MDRFOI__ID=10538715&pc=QCB	2023826-2020-02049	2020-07-08	Injury	STAAR SURGICAL COMPANY	2020-09-15	QCB	IMPLANTABLE COLLAMER LENS (ICL)	Off-Label Use; Optical Problem	Cataract; Intraocular Pressure Increased; Nausea; Pupillary Block; Blurred Vision; Vomiting; Halo; Appropriate Clinical Signs, Symptoms, Conditions Term / Code Not Available	N/A	NA	1	Event Description: THE REPORTER INDICATED THAT THE SURGEON IMPLANTED A 13.2MM VTICMO13.2 IMPLANTABLE COLLAMER LENS, -17.50/1.50/080 (SPHERE/CYLINDER/AXIS) INTO THE PATIENT'S RIGHT EYE (OD) ON (B)(6)2020. ON (B)(6) 2020 THE SURGEON ASSESSED AN ELEVATED IOP OF 22MMHG. THIS WAS CONTROLLED WITHIN THE FIRST 24 HOURS WITH MEDICATION. ALSO REPORTED IS PIGMENT DISPERSION, UNREACTIVE (FIXED) PUPIL, DILATE…	Lens Retention	Resolved
https://www.accessdata.fda.gov/scripts/cdrh/cfdocs/cfMAUDE/Detail.CFM?MDRFOI__ID=8807833&pc=QCB	2023826-2019-01275	2019-04-18 04:00:00	Injury	STAAR SURGICAL COMPANY	2019-07-19 04:00:00	QCB	IMPLANTABLE COLLAMER LENS (ICL)	Adverse Event Without Identified Device or Use Problem	Cataract; Intraocular Pressure Increased; No Code Available	N/A	NA	1	Event Description: THE REPORTER INDICATED THAT A 13.2 MM, VTICMO13.2, -11.00/1.0/155 (SPHERE/CYLINDER/AXIS), IMPLANTABLE COLLAMER LENS WAS IMPLANTED INTO THE PATIENTS RIGHT EYE (OD) ON (B)(6) 2019. THE DAY AFTER OPERATION THE EYE HAD UNDERGONE MYDRIASIS, WHICH WAS IMPOSSIBLE TO NARROW. ON (B)(6) 2019 THE LENS WAS EXPLANTED. THE SURGEON STATED " THE EVENT WAS DUE TO AN UNKNOWN PROBLEM. I CAN ONLY …	Lens Extraction	Unknown
https://www.accessdata.fda.gov/scripts/cdrh/cfdocs/cfMAUDE/Detail.CFM?MDRFOI__ID=15620830&pc=QCB	2023826-2022-03493	2022-08-30 04:00:00	Injury	STAAR SURGICAL COMPANY	2022-10-18 04:00:00	QCB	IMPLANTABLE COLLAMER LENS (ICL)	Adverse Event Without Identified Device or Use Problem	Cataract; Intraocular Pressure Increased; Pupillary Block; Appropriate Clinical Signs, Symptoms, Conditions Term / Code Not Available	P030016	NA	1	Event Description: THE REPORTER INDICATED THE SURGEON IMPLANTED A 13.2MM VTICM5_13.2 IMPLANTABLE COLLAMER LENS, -12.00/+1.0/084, INTO THE PATIENTS RIGHT EYE (OD) ON (B)(6) 2022. THE LENS WAS REMOVED ON (B)(6) 2022 DUE TO PUPIL BLOCK WITH ELEVATED INTRAOCULAR PRESSURE (IOP) AND THE DEVELOPMENT OF AN ANTERIOR SUBCAPSULAR (ASC) CATARACT. PHACO-EMULSIFICATION (CATARACT SURGERY) WAS PERFORMED AND AN I…	Lens Extraction + Secondary Operation	Resolved
https://www.accessdata.fda.gov/scripts/cdrh/cfdocs/cfMAUDE/Detail.CFM?MDRFOI__ID=11366584&pc=QCB	2023826-2021-00480	2021-01-21 05:00:00	Injury	STAAR SURGICAL COMPANY	2021-02-23 05:00:00	QCB	IMPLANTABLE COLLAMER LENS (ICL)	Inadequacy of Device Shape and/or Size	Cataract; No Clinical Signs, Symptoms or Conditions	N/A	NA	1	Event Description: THE REPORTER INDICATED THE SURGEON IMPLANTED A 12.6MM VTICM5_12.6 IMPLANTABLE COLLAMER LENS, -11.5/+0.5/010 (SPHERE/CYLINDER/AXIS) INTO THE PATIENT'S RIGHT EYE (OD) ON (B)(6) 2019. ON (B)(6) 2021 THE LENS WAS EXPLANTED DUE TO LOW VAULT. Manufacturer Narrative: B5-ADDITIONAL INFORMATION: REPORTEDLY, LENS OPACITY ASC WAS REPORTED; OBSERVED ON (B)(6) 2021, AFTER LENS WAS EXPLANTED…	Lens Extraction	Unknown
https://www.accessdata.fda.gov/scripts/cdrh/cfdocs/cfMAUDE/Detail.CFM?MDRFOI__ID=11368673&pc=QCB	2023826-2021-00463	2020-12-15 05:00:00	Injury	STAAR SURGICAL COMPANY	2021-02-23 05:00:00	QCB	IMPLANTABLE COLLAMER LENS (ICL)	Inadequacy of Device Shape and/or Size; Device Dislodged or Dislocated	Cataract; No Clinical Signs, Symptoms or Conditions	NA#S-P#NA	NA	1	Event Description: THE REPORTER INDICATED THE SURGEON IMPLANTED A 13.2MM VTICM5_13.2 IMPLANTABLE COLLAMER LENS -11.50/+2.5/179 (SPHERE/CYLINDER/AXIS), INTO THE PATIENTS LEFT EYE (OS) ON (B)(6) 2020. THE LENS WAS REPORTED AS HAVING ROTATED. THE LENS WAS REPOSITIONED ON (B)(6) 2020 BUT THE PROBLEM WAS NOT RESOLVED. THE ICL WAS TOO SMALL. THE LENS REMAINED IMPLANTED. Manufacturer Narrative: B5: THE …	Lens Extraction + Secondary Operation	Unknown
https://www.accessdata.fda.gov/scripts/cdrh/cfdocs/cfMAUDE/Detail.CFM?MDRFOI__ID=12021862&pc=QCB	2023826-2021-02006	2020-08-06 04:00:00	Death	STAAR SURGICAL COMPANY	2021-06-17 04:00:00	QCB	IMPLANTABLE COLLAMER LENS	Contamination; Adverse Event Without Identified Device or Use Problem	Cataract; No Clinical Signs, Symptoms or Conditions	N/A	NA	1	Event Description: THE REPORTER INDICATED THE SURGEON IMPLANTED A 13.2MM VTICM5_13.2 IMPLANTABLE COLLAMER LENS, -9.5/+6.0/108 (SPHERE/CYLINDER/AXIS) INTO THE PATIENT'S RIGHT (OD) EYE ON (B)(6) 2020. ON (B)(6) 2020 THE LENS WAS EXCHANGED WITH AN ALTERNATE LENS DUE TO LENS OPACITY-CORTICAL. THE CAUSE OF THE EVENT IS REPORTED AS UNKNOWN. THE SURGEON STATES THAT THE LENS HAS A DEPOSIT ON ITS SURFACE.…	Lens Exchange	Unknown
https://www.accessdata.fda.gov/scripts/cdrh/cfdocs/cfMAUDE/Detail.CFM?MDRFOI__ID=15465183&pc=QCB	2023826-2022-03166	2022-08-23 04:00:00	Injury	STAAR SURGICAL COMPANY	2022-09-22 04:00:00	QCB	IMPLANTABLE COLLAMER LENS (ICL)	Off-Label Use; Adverse Event Without Identified Device or Use Problem; Unintended Movement	Cataract; No Clinical Signs, Symptoms or Conditions	P030016	NA	1	Event Description: THE REPORTER INDICATED THE SURGEON INSERTED AND REMOVED A 13.2MM VTICM5_13.2 IMPLANTABLE COLLAMER LENS, -09.50/+3.0/093 (SPHERE/CYLINDER/AXIS), WITHIN THE SAME SURGERY DUE TO THE LENS FLIPPED IN THE EYE. THE BACKUP LENS WAS IMPLANTED. ADDITIONAL INFORMATION HAS BEEN REQUESTED BUT NONE HAS BEEN FORTHCOMING. Manufacturer Narrative: ADDITIONAL DATA: H6: HEALTH IMPACT: ADDITIONAL S…	Lens Extraction + Secondary Operation	Resolved
https://www.accessdata.fda.gov/scripts/cdrh/cfdocs/cfMAUDE/Detail.CFM?MDRFOI__ID=16766105&pc=QCB	2023826-2023-01343	NA	Injury	STAAR SURGICAL COMPANY	2023-04-18 04:00:00	QCB	IMPLANTABLE COLLAMER LENS (ICL)	Misfocusing	Cataract; No Clinical Signs, Symptoms or Conditions	P030016	NA	1	Event Description: THE REPORTER INDICATED THAT A 13.2MM VTICMO13.2 IMPLANTABLE COLLAMER LENS OF -15.0/2.0/090 (SPHERE/CYLINDER/AXIS) WAS IMPLANTED AS A REPLACEMENT LENS INTO THE PATIENT'S LEFT EYE (OS) ON (B)(6) 2023. REPORTEDLY, "PAT STILL WITH LENS OPACITY SUPRISINGLY, BUT BETTER VAULT." Manufacturer Narrative: CORRECTED DATA: B1: SHOULD BE CORRECTED TO ADVERSE EVENT. B2: OTHER SERIOUS OR IMPOR…	Unknown	Unknown
https://www.accessdata.fda.gov/scripts/cdrh/cfdocs/cfMAUDE/Detail.CFM?MDRFOI__ID=17986861&pc=QCB	2023826-2023-04603	NA	Injury	STAAR SURGICAL COMPANY	2023-10-23 04:00:00	QCB	IMPLANTABLE COLLAMER LENS (ICL)	Adverse Event Without Identified Device or Use Problem	Cataract; No Clinical Signs, Symptoms or Conditions	P030016	NA	1	Event Description: THE REPORTER INDICATED THAT A 13.2MM, VTICM5_13.2, -12.5/2.0/087 (SPHERE/CYLINDER/AXIS), IMPLANTABLE COLLAMER LENS WAS IMPLANTED INTO THE PATIENT'S RIGHT EYE (OD) ON (B)(6) 2023. MILD LENS OPACITY (ASC) WAS OBSERVED. LENS REMAINS IMPLANTED. REPORTEDLY, PATIENT IS VERY HAPPY. ADDITIONAL INFORMATION HAS BEEN REQUESTED BUT NONE HAS BEEN FORTHCOMING. Manufacturer Narrative: H6 - WO…	Lens Retention	Resolved
https://www.accessdata.fda.gov/scripts/cdrh/cfdocs/cfMAUDE/Detail.CFM?MDRFOI__ID=17986877&pc=QCB	2023826-2023-04604	NA	Injury	STAAR SURGICAL COMPANY	2023-10-23 04:00:00	QCB	IMPLANTABLE COLLAMER LENS (ICL)	Adverse Event Without Identified Device or Use Problem	Cataract; No Clinical Signs, Symptoms or Conditions	P030016	NA	1	Event Description: THE REPORTER INDICATED THAT A 13.2MM, VTICM5_13.2, -11.5/1.5/112 (SPHERE/CYLINDER/AXIS), IMPLANTABLE COLLAMER LENS WAS IMPLANTED INTO THE PATIENT'S LEFT EYE (OS) ON (B)(6) 2023. MILD LENS OPACITY (ASC) WAS OBSERVED. LENS REMAINS IMPLANTED. REPORTEDLY, PATIENT IS VERY HAPPY. ADDITIONAL INFORMATION HAS BEEN REQUESTED BUT NONE HAS BEEN FORTHCOMING. Manufacturer Narrative: CLAIM# (…	Lens Retention	Resolved
https://www.accessdata.fda.gov/scripts/cdrh/cfdocs/cfMAUDE/Detail.CFM?MDRFOI__ID=8307838&pc=QCB	2023826-2019-00213	2018-10-20 04:00:00	Injury	STAAR SURGICAL COMPANY	2019-02-05 05:00:00	QCB	IMPLANTABLE COLLAMER LENS (ICL)	Adverse Event Without Identified Device or Use Problem	Cataract; No Code Available	N/A	NA	1	Event Description: THE REPORTER INDICATED THE SURGEON IMPLANTED AN 12.6MM VTICMO12.6 IMPLANTABLE COLLAMER LENS, -16.5/+1.5/094 (SPHERE/CYLINDER/AXIS) INTO THE PATIENT'S LEFT EYE (OS) ON (B)(6) 2018. ON (B)(6) 2018 THE LENS WAS EXPLANTED AND PHACO-EMULSIFICATION (CATARACT SURGERY) AND IOL IMPLANTATION WAS PERFORMED, THE SURGEON NOTING LENS OPACITY CORTICAL. REPORTEDLY, THE PROBLEM IS RESOLVED. THE…	Lens Extraction + Secondary Operation	Resolved
https://www.accessdata.fda.gov/scripts/cdrh/cfdocs/cfMAUDE/Detail.CFM?MDRFOI__ID=8426297&pc=QCB	2023826-2019-00417	2018-11-16 05:00:00	Injury	STAAR SURGICAL COMPANY	2019-03-15 04:00:00	QCB	IMPLANTABLE COLLAMER LENS (ICL)	Off-Label Use	Cataract; No Code Available	N/A	NA	1	Event Description: THE REPORT STATED "BEFORE THE SURGERY, DOCTORS HAD OBSERVED CATARACTS. AND THE DOCTOR HAD FULL COMMUNICATION WITH THE PATIENT". A VTICMO13.2, -8.5/1.0/081 (SPHERE/CYLINDER/AXIS), IMPLANTABLE COLLAMER LENS WAS IMPLANTED INTO THE PATIENTS RIGHT EYE (OD) ON (B)(6) 2018 AND LATER REMOVED ON THE SAME DAY. LENS OPACITY (CORTICAL, DATE: (B)(6) 2018) WAS REPORTED. IN THE REPORTERS OPIN…	Lens Extraction	Unknown
https://www.accessdata.fda.gov/scripts/cdrh/cfdocs/cfMAUDE/Detail.CFM?MDRFOI__ID=8601622&pc=QCB	2023826-2019-00811	2018-02-28 05:00:00	Injury	STAAR SURGICAL COMPANY	2019-05-10 04:00:00	QCB	IMPLANTABLE COLLAMER LENS (ICL)	Off-Label Use; Inadequacy of Device Shape and/or Size	Cataract; No Code Available	N/A	NA	1	Event Description: THE REPORTER INDICATED THAT A 12.6MM, VTICMO12.6,-10.50/1.0/096 (SPHERE/CYLINDER/AXIS) , IMPLANTABLE COLLAMER LENS WAS IMPLANTED INTO THE PATIENT'S LEFT EYE (OS) ON (B)(6) 2018. ON (B)(6) 2018 THE LENS WAS EXCHANGED FOR A LONGER LENGTH LENS DUE TO OBSERVATION OF LOW VAULT. THIS EXCHANGE RESOLVED THE PROBLEM. Manufacturer Narrative: (B)(4). Manufacturer Narrative: OTHER RELEVANT…	Lens Exchange	Resolved
https://www.accessdata.fda.gov/scripts/cdrh/cfdocs/cfMAUDE/Detail.CFM?MDRFOI__ID=8932863&pc=QCB	2023826-2019-01545	NA	Injury	STAAR SURGICAL COMPANY	2019-08-26 04:00:00	QCB	IMPLANTABLE COLLAMER LENS (ICL)	Adverse Event Without Identified Device or Use Problem	Cataract; No Code Available	P030016	NA	1	Event Description: THE REPORTER INDICATED THE SURGEON IMPLANTED A 13.2MM TMICL13.2 IMPLANTABLE COLLAMER LENS, - 14.00/+2.5/069 (SPHERE/CYLINDER/AXIS), IN THE PATIENT'S RIGHT EYE (OD). THE LENS WAS EXPLANTED ON (B)(6) 2019 DUE TO A CATARACT HAD DEVELOPED. THE PATIENT HAD A LASIK PROCEDURE AFTER THE ICL SURGERY. THE LENS WAS DISCARDED. ADDITIONAL INFORMATION HAS BEEN REQUESTED BUT NONE HAS BEEN FOR…	Lens Extraction + Secondary Operation	Resolved
https://www.accessdata.fda.gov/scripts/cdrh/cfdocs/cfMAUDE/Detail.CFM?MDRFOI__ID=10011427&pc=QCB	2023826-2020-00996	2020-01-30 05:00:00	Injury	STAAR SURGICAL COMPANY	2020-04-29 04:00:00	QCB	IMPLANTABLE COLLAMER LENS (ICL)	Inadequacy of Device Shape and/or Size; Device Dislodged or Dislocated	Cataract; No Code Available	NA	NA	1	Event Description: THE REPORTER INDICATED THAT A 12.6MM, VTICMO12.6, -17.00/2.0/071 (SPHERE/CYLINDER/AXIS), IMPLANTABLE COLLAMER LENS WAS IMPLANTED INTO THE PATIENTS LEFT EYE (OS) ON (B)(6) 2019. ON (B)(6) 2020 THE LENS WAS EXPLANTED DUE TO LOW VAULT. A REPLACEMENT LENS WAS LATER IMPLANTED AND THE PROBLEM RESOLVED, PATIENT IS IN VERY GOOD CONDITION. THE REPORTER STATED THAT LENS OPACITY ASC WAS N…	Lens Exchange	Resolved
https://www.accessdata.fda.gov/scripts/cdrh/cfdocs/cfMAUDE/Detail.CFM?MDRFOI__ID=10285662&pc=QCB	2023826-2020-01480	NA	Injury	STAAR SURGICAL COMPANY	2020-07-16	QCB	IMPLANTABLE COLLAMER LENS	Misfocusing	Cataract; No Code Available	N/A	NA	1	Event Description: THE REPORTER INDICATED THE SURGEON IMPLANTED A 13.2MM VTICM5_13.2 IMPLANTABLE COLLAMER LENS, -8.0/+1.0/038 (SPHERE/CYLINDER/AXIS) INTO THE PATIENT'S RIGHT (OD) EYE ON (B)(6) 2020. REPORTEDLY, THE PATIENT WAS OPERATED ON WITHOUT COMPLICATIONS. AT THE END OF THE SURGERY THE DOCTOR NOTICED AN OPACIFICATION IN THE CENTER OF THE LENS CORTEX BUT WASN'T SURE IF IT WAS THERE PREVIOUSLY…	Lens Extraction + Secondary Operation	Unknown
https://www.accessdata.fda.gov/scripts/cdrh/cfdocs/cfMAUDE/Detail.CFM?MDRFOI__ID=10337903&pc=QCB	2023826-2020-01604	2020-06-27 04:00:00	Injury	STAAR SURGICAL COMPANY	2020-07-29 04:00:00	QCB	IMPLANTABLE COLLAMER LENS (ICL)	Adverse Event Without Identified Device or Use Problem	Cataract; No Code Available	NA	NA	1	Event Description: THE REPORTER INDICATED THAT A 13.2MM, VTICM5_13.2, -9.00/2.00/95 (SPHERE/ CYLINDER/ AXIS), IMPLANTABLE COLLAMER LENS WAS IMPLANTED INTO THE PATIENTS RIGHT EYE (OD) ON (B)(6) 2020. IT WAS REPORTED THAT THE LENS WAS REMOVED WITHIN THE SAME SURGERY AND PHACO-EMULSIFICATION AND IOL IMPLANTATION WAS PERFORMED ON THE SAME DAY DUE TO LENS OPACITY (ASC). THE REPORTER STATED THAT THE OP…	Lens Extraction + Secondary Operation	Unknown
https://www.accessdata.fda.gov/scripts/cdrh/cfdocs/cfMAUDE/Detail.CFM?MDRFOI__ID=10429096&pc=QCB	2023826-2020-01830	2019-05-15	Injury	STAAR SURGICAL COMPANY	2020-08-19	QCB	IMPLANTABLE COLLAMER LENS	Adverse Event Without Identified Device or Use Problem	Cataract; No Code Available	N/A	NA	1	Event Description: THE REPORTER INDICATED THE SURGEON IMPLANTED A 13.2MM VTICM5_13.2 IMPLANTABLE COLLAMER LENS, -10.0/+1.0/084 (SPHERE/CYLINDER/AXIS) INTO THE PATIENT'S LEFT (OS) EYE ON (B)(6) 2017. ON (B)(6) 2019 THE LENS WAS EXPLANTED DUE TO LENS OPACITY ASC. CATARACT SURGERY WAS PERFORMED AND THE PROBLEM WAS RESOLVED. THE CAUSE OF THE EVENT IS REPORTED AS UNKNOWN. Manufacturer Narrative: THIS …	Lens Extraction + Secondary Operation	Resolved
https://www.accessdata.fda.gov/scripts/cdrh/cfdocs/cfMAUDE/Detail.CFM?MDRFOI__ID=10429117&pc=QCB	2023826-2020-01846	2019-05-15	Injury	STAAR SURGICAL COMPANY	2020-08-19	QCB	IMPLANTABLE COLLAMER LENS	Adverse Event Without Identified Device or Use Problem	Cataract; No Code Available	N/A	NA	1	Event Description: THE REPORTER INDICATED THE SURGEON IMPLANTED A 13.2MM VTICM5_13.2 IMPLANTABLE COLLAMER LENS, -10.0/+1.0/104 (SPHERE/CYLINDER/AXIS) INTO THE PATIENT'S RIGHT (OD) EYE ON (B)(6) 2017. ON (B)(6) 2019 THE LENS WAS EXPLANTED DUE TO LENS OPACITY ASC. PHACO-EMULSIFICATION (CATARACT SURGERY) AND IOL IMPLANTATION WAS PERFORMED AND THE PROBLEM WAS RESOLVED. THE CAUSE OF THE EVENT IS REPOR…	Lens Extraction + Secondary Operation	Resolved
https://www.accessdata.fda.gov/scripts/cdrh/cfdocs/cfMAUDE/Detail.CFM?MDRFOI__ID=9742235&pc=QCB	2023826-2020-00373	NA	Injury	STAAR SURGICAL COMPANY	2020-02-21 05:00:00	QCB	IMPLANTABLE COLLAMER LENS (ICL)	Device Dislodged or Dislocated	Cataract; No Known Impact Or Consequence To Patient	N/A	NA	1	Event Description: TICL LENS ROTATION WAS REPORTED. EMAIL STATES "WE HAVE A PATIENT THAT HAS HAD HIS ICL ROTATE AND WE'LL NEED TO REPOSITION." IF ADDITIONAL INFORMATION IS RECEIVED A SUPPLEMENTAL MEDWATCH REPORT WILL BE SUBMITTED. Manufacturer Narrative: A1: 231999120 TK. B5- THE REPORTER INDICATED THAT A 12.6MM, VTICMO12.6, -15.5/2.5/111 (SPHERE/CULINDER/AXIS), IMPLANTABLE COLLAMER LENS WAS IMPL…	Lens Retention	Unknown
https://www.accessdata.fda.gov/scripts/cdrh/cfdocs/cfMAUDE/Detail.CFM?MDRFOI__ID=9689304&pc=QCB	2023826-2020-00184	2020-01-16 05:00:00	Injury	STAAR SURGICAL COMPANY	2020-02-10 05:00:00	QCB	IMPLANTABLE COLLAMER LENS (ICL)	Inadequacy of Device Shape and/or Size	Cataract; No Known Impact Or Consequence To Patient; No Code Available	P030016	NA	1	Event Description: THE REPORTER INDICATED THAT A 13.2MM, TMICL13.2, -7.50/1.5/086 (SPHERE/CYLINDER/AXIS), IMPLANTABLE COLLAMER LENS WAS IMPLANTED INTO THE PATIENT'S RIGHT EYE (OD) ON (B)(6) 2019. LOW VAULT WAS OBSERVED. LENS REMAINS IMPLANTED. CAUSE OF THE EVENT IS REPORTED AS UNKNOWN. REPORTEDLY, LENS EXCHANGE TO OCCUR. Manufacturer Narrative: CORRECTED DATA: B4- "16-JAN-2020" SHOULD BE CORRECTE…	Lens Extraction	Unknown
https://www.accessdata.fda.gov/scripts/cdrh/cfdocs/cfMAUDE/Detail.CFM?MDRFOI__ID=17844162&pc=QCB	2023826-2023-04346	NA	Injury	STAAR SURGICAL COMPANY	2023-09-29 04:00:00	QCB	IMPLANTABLE COLLAMER LENS (ICL)	Device Dislodged or Dislocated; Optical Problem	Cataract; Visual Disturbances; Halo; Appropriate Clinical Signs, Symptoms, Conditions Term / Code Not Available	N/A	NA	1	Event Description: THE REPORTER INDICATED THAT A 12.6MM, TMICL12.6, -12.5/2.5/097 (SPHERE/CYLINDER/AXIS), IMPLANTABLE COLLAMER LENS WAS IMPLANTED INTO THE PATIENT'S RIGHT EYE (OD) ON (B)(6) 2022. LENS REPOSITIONING ON (B)(6) 2022 WAS PERFORMED DUE TO ROTATION AND DISPHOTOPSIA ISSUES BUT DID NOT RESOLVE THE PROBLEM. THE LENS WAS EXCHANGED FOR A LONGER LENGTH SIMILAR POWER LENS (SPHERE/CYLINDER/AXI…	Lens Exchange	Resolved
https://www.accessdata.fda.gov/scripts/cdrh/cfdocs/cfMAUDE/Detail.CFM?MDRFOI__ID=17844244&pc=QCB	2023826-2023-04347	NA	Injury	STAAR SURGICAL COMPANY	2023-09-29 04:00:00	QCB	IMPLANTABLE COLLAMER LENS (ICL)	Device Dislodged or Dislocated; Optical Problem	Cataract; Visual Disturbances; Halo; Appropriate Clinical Signs, Symptoms, Conditions Term / Code Not Available	N/A	NA	1	Event Description: THE REPORTER INDICATED THAT A 12.6MM, TMICL12.6, -12.5/2.5/092 (SPHERE/CYLINDER/AXIS), IMPLANTABLE COLLAMER LENS WAS IMPLANTED INTO THE PATIENT'S LEFT EYE (OS) ON (B)(6) 2022. LENS WAS EXCHANGED WITH LONGER LENGTH SIMILAR POWER LENS(SPHERE/CYLINDER/AXIS) DUE TO DISPHOTOPSIA ISSUES ON (B)(6) 2023. PROBLEM RESOLVED. Manufacturer Narrative: ADDITIONAL INFORMATION: A2 - (B)(6)1983,…	Lens Exchange	Resolved
https://www.accessdata.fda.gov/scripts/cdrh/cfdocs/cfMAUDE/Detail.CFM?MDRFOI__ID=8941309&pc=QCB	2023826-2019-01571	2019-07-31 04:00:00	Injury	STAAR SURGICAL COMPANY	2019-08-28 04:00:00	QCB	IMPLANTABLE COLLAMER LENS (ICL)	Optical Problem	Cataract; Visual Disturbances; Halo; No Code Available	P030016	NA	1	Event Description: THE REPORTER INDICATED THAT THE SURGEON IMPLANTED A 13.2MM TMICL13.2 LENS, -13.0/+3.0/092 (SPHERE/CYLINDER/AXIS) INTO THE PATIENT'S LEFT (OS) EYE ON (B)(6) 2019. ON (B)(6) 2019 CATARACT SURGERY WAS PERFORMED DUE TO LENS OPACITY-CORTICAL, GLARE/HALOS, POOR VISION, AND CORTICAL CHANGES. THE SURGEON STATES, "VISION POOR WITH GLARE/HALOS, SOME DOUBLE." Manufacturer Narrative: "IT W…	Lens Extraction + Secondary Operation	Resolved
https://www.accessdata.fda.gov/scripts/cdrh/cfdocs/cfMAUDE/Detail.CFM?MDRFOI__ID=10171666&pc=QCB	2023826-2020-01273	2020-05-22 04:00:00	Injury	STAAR SURGICAL COMPANY	2020-06-18 04:00:00	QCB	IMPLANTABLE COLLAMER LENS (ICL)	Inadequacy of Device Shape and/or Size; Device Dislodged or Dislocated	Cataract; Visual Disturbances; No Code Available	N/A	NA	1	Event Description: THE REPORTER INDICATED THAT THE SURGEON IMPLANTED A 12.1MM VTICMO12.1 IMPLANTABLE COLLAMER LENS, -7.0/+4.5/091 (SPHERE/CYLINDER/AXIS) INTO THE PATIENT'S LEFT EYE (OS) ON (B)(6) 2018. ON (B)(6) 2020 THE SURGEON ASSESSED LENS OPACITY ASC. ALSO REPORTED IS LOW VAULT AND LENS ROTATION. REPORTEDLY, THE LENS REMAINS IMPLANTED. THE CAUSE OF THE EVENT IS REPORTED AS UNKNOWN. Manufactur…	Lens Exchange	Not_Resolved
https://www.accessdata.fda.gov/scripts/cdrh/cfdocs/cfMAUDE/Detail.CFM?MDRFOI__ID=10171670&pc=QCB	2023826-2020-01272	2020-05-22 04:00:00	Injury	STAAR SURGICAL COMPANY	2020-06-18 04:00:00	QCB	IMPLANTABLE COLLAMER LENS (ICL)	Inadequacy of Device Shape and/or Size; Device Dislodged or Dislocated	Cataract; Visual Disturbances; No Code Available	N/A	NA	1	Event Description: THE REPORTER INDICATED THAT THE SURGEON IMPLANTED A 12.1MM VTICMO12.1 IMPLANTABLE COLLAMER LENS, -8.5/+4.5/110 (SPHERE/CYLINDER/AXIS) INTO THE PATIENT'S RIGHT EYE (OD) ON (B)(6) 2018. ON (B)(6) 2020 THE SURGEON ASSESSED LENS OPACITY ASC. ALSO REPORTED IS LOW VAULT AND LENS ROTATION. ON (B)(6) 2018 THE LENS WAS REPOSITIONED WHICH DID NOT RESOLVE THE PROBLEM. REPORTEDLY, THE LENS…	Lens Exchange	Resolved
https://www.accessdata.fda.gov/scripts/cdrh/cfdocs/cfMAUDE/Detail.CFM?MDRFOI__ID=6522593&pc=MTA	2023826-2017-00710	2017-03-20	Injury	STAAR SURGICAL COMPANY	2017-04-26	MTA	IMPLANTABLE COLLAMER LENS (ICL)	Inadequacy of Device Shape and/or Size	Cataract	N/A	NA	1	Event Description: THE REPORTER INDICATED THAT THE SURGEON IMPLANTED A 12.6MM VTICM5_12.6, DIOPTER -11.0/1.0/091 IMPLANTABLE COLLAMER LENS (ICL), INTO THE PATIENT'S RIGHT EYE (OD) ON (B)(6) 2017. THE PATIENT BEGAN TO EXPERIENCE LOW VAULT AND LENS OPACITY. TO DATE, THE LENS REMAINS IMPLANTED. Manufacturer Narrative: THIS PRODUCT IS MANUFACTURED BUT NOT MARKETED IN THE U.S. (B)(6). WORK ORDER SEARC…	Lens Retention	Unknown
https://www.accessdata.fda.gov/scripts/cdrh/cfdocs/cfMAUDE/Detail.CFM?MDRFOI__ID=6534124&pc=MTA	2023826-2017-00711	2017-03-20	Injury	STAAR SURGICAL COMPANY	2017-05-01	MTA	IMPLANTABLE COLLAMER LENS (ICL)	Inadequacy of Device Shape and/or Size	Cataract	N/A	NA	1	Event Description: THE REPORTER INDICATED THAT THE SURGEON IMPLANTED A 12.6MM VTICM5_12.6, DIOPTER -10.0/2.0/093 IMPLANTABLE COLLAMER LENS (ICL), INTO THE PATIENT'S LEFT EYE (OS) ON (B)(6) 2017. THE PATIENT BEGAN TO EXPERIENCE LOW VAULT AND LENS OPACITY. TO DATE, THE LENS REMAINS IMPLANTED. Manufacturer Narrative: THIS PRODUCT IS MANUFACTURED BUT NOT MARKETED IN THE U.S. CONCLUSION CODE: OFF-LABE…	Lens Retention	Unknown
https://www.accessdata.fda.gov/scripts/cdrh/cfdocs/cfMAUDE/Detail.CFM?MDRFOI__ID=5873717&pc=MTA	2023826-2016-01069	2015-07-12	Injury	STAAR SURGICAL COMPANY AG	2016-08-12	MTA	ICL (IMPLANTABLE COLLAMER LENS)	Adverse Event Without Identified Device or Use Problem; Appropriate Term/Code Not Available	Cataract, Induced; Blurred Vision; Halo; No Code Available	NA	NA	1	Event Description: THE REPORTER INDICATED THE SURGEON IMPLANTED A 12.0MM TICM120V4 IMPLANTABLE COLLAMER LENS, -15.50/+1.50/172 DIOPTER, IN THE PATIENT'S RIGHT EYE (OD) ON (B)(6) 2004. THE LENS WAS EXPLANTED ON (B)(6) 2016 DUE TO LENS OPACITY (ANTERIOR/POSTERIOR SUBCAPSULAR AND NUCLEAR), WHICH WAS NOTED ON (B)(6) 2015. THE PATIENT EXPERIENCED BLURRED VISION, GLARE AND HALOS. CATARACT SURGERY WAS P…	Lens Extraction + Secondary Operation	Unknown
https://www.accessdata.fda.gov/scripts/cdrh/cfdocs/cfMAUDE/Detail.CFM?MDRFOI__ID=5873711&pc=MTA	2023826-2016-01070	2004-05-19	Injury	STAAR SURGICAL COMPANY AG	2016-08-12	MTA	ICL (IMPLANTABLE COLLAMER LENS)	Device Operates Differently Than Expected; Appropriate Term/Code Not Available	Cataract, Induced; Blurred Vision; Halo; No Code Available	NA	NA	1	Event Description: THE REPORTER INDICATED THE SURGEON IMPLANTED A 12.0MM TICM120V4 IMPLANTABLE COLLAMER LENS, -14.50/+3.75/167 DIOPTER, IN THE PATIENT'S LEFT EYE (OS) ON (B)(6) 2004. THE LENS WAS EXPLANTED ON (B)(6) 2016 DUE TO LENS OPACITY (POSTERIOR SUBCAPSULAR AND NUCLEAR), WHICH WAS NOTED ON (B)(6) 2015. THE PATIENT EXPERIENCED BLURRED VISION, GLARE AND HALOS. CATARACT SURGERY WAS PERFORMED A…	Lens Extraction + Secondary Operation	Unknown
https://www.accessdata.fda.gov/scripts/cdrh/cfdocs/cfMAUDE/Detail.CFM?MDRFOI__ID=6955552&pc=MTA	2023826-2017-01577	2017-04-13	Injury	STAAR SURGICAL COMPANY	2017-10-17	MTA	IMPLANTABLE COLLAMER LENS	Activation Failure	Cataract, Induced; Blurred Vision; No Code Available	NA	NA	1	Event Description: THE REPORTER INDICATED THAT AFTER THE SURGEON IMPLANTED A 13.2MM VTICMO13.2 IMPLANTABLE COLLAMER LENS, DIOPTER -10.5/+2.0/097 INTO THE PATIENT'S LEFT EYE (OS), THE LENS WOULD NOT PROPERLY UNFOLD. THE SURGEON STATES THAT, "AFTER ALL POSSIBLE MANEUVERS" THE LENS DIDN'T UNFOLD PROPERLY AND THE LENS WAS EXPLANTED. DURING EXPLANT THE LENS WAS SCRATCHED. THIS OCCURRED ON (B)(6) 2017.…	Lens Extraction + Secondary Operation	Resolved
https://www.accessdata.fda.gov/scripts/cdrh/cfdocs/cfMAUDE/Detail.CFM?MDRFOI__ID=6176008&pc=MTA	2023826-2016-01763	2014-09-17	Injury	STAAR SURGICAL COMPANY AG	2016-12-15	MTA	ICL (IMPLANTABLE COLLAMER LENS)	Adverse Event Without Identified Device or Use Problem	Cataract, Induced; Blurred Vision; No Code Available	NA	NA	1	Event Description: THE REPORTER INDICATED THE SURGEON IMPLANTED A 12.5MM TICM125V4 IMPLANTABLE COLLAMER LENS, -14.0/+1.50/042 DIOPTER, IN THE PATIENT'S RIGHT EYE (OD) ON (B)(6) 2014. THE LENS WAS EXPLANTED ON (B)(6) 2016 DUE TO LENS OPACITY (ANTERIOR SUBCAPSULAR), WHICH WAS NOTED ON (B)(6) 2014. THE PATIENT EXPERIENCED BLURRED VISION AND CLOUDY VISUAL ACUITY. CATARACT SURGERY WAS PERFORMED AND AN…	Lens Extraction + Secondary Operation	Resolved
https://www.accessdata.fda.gov/scripts/cdrh/cfdocs/cfMAUDE/Detail.CFM?MDRFOI__ID=6608173&pc=MTA	2023826-2017-00900	2017-03-20	Injury	STAAR SURGICAL COMPANY	2017-06-02	MTA	ICL (IMPLANTABLE COLLAMER LENS)	Inadequacy of Device Shape and/or Size	Cataract, Induced; Intraocular Pressure Increased; No Code Available	N/A	NA	1	Event Description: THE REPORTER INDICATED THAT THE SURGEON IMPLANTED A 13.2MM VTICMO13.2 IMPLANTABLE COLLAMER LENS, -16.5/+1.0/043 DIOPTER, IN THE PATIENT'S LEFT EYE (OS) ON (B)(6) 2017. THE PATIENT EXPERIENCED EXCESSIVE VAULTING, ELEVATED IOP, SIGNIFICANT REDUCTION OF IRIDO-CORNEAL ANGLES, UNREACTIVE PUPIL (FIXED), ANGLE CLOSURE, AND IRIS ATROPHY. ON (B)(6) 2017 THE PATIENT ALSO EXPERIENCED LENS…	Lens Exchange	Resolved
https://www.accessdata.fda.gov/scripts/cdrh/cfdocs/cfMAUDE/Detail.CFM?MDRFOI__ID=6684194&pc=MTA	2023826-2017-01086	2016-10-15	Injury	STAAR SURGICAL COMPANY	2017-07-03	MTA	ICL (IMPLANTABLE COLLAMER LENS)	Device Operates Differently Than Expected	Cataract, Induced; No Code Available	N/A	NA	1	Event Description: THE REPORTER INDICATED THAT THE SURGEON IMPLANTED A 13.2MM VTICMO13.2 IMPLANTABLE COLLAMER LENS, -9.0/+1.0/93 DIOPTER, IN THE PATIENT'S RIGHT EYE (OD) ON (B)(6) 2016. ACCORDING TO THE DR. THAT BECAUSE THE SURGERY OPERATING TIME WAS TOO LONG, THE SUSPENSORY LIGAMENT NEAR THE LENS CAPSULE MEMBRANE DOT LIGHT LENS OPACITY. THE LENS WAS EXPLANTED IN THE SAME SURGERY, AND THE PHACO-E…	Lens Extraction + Secondary Operation	Unknown
https://www.accessdata.fda.gov/scripts/cdrh/cfdocs/cfMAUDE/Detail.CFM?MDRFOI__ID=5711853&pc=MTA	2023826-2016-00720	2016-05-08	Injury	STAAR SURGICAL COMPANY	2016-06-09	MTA	ICL (IMPLANTABLE COLLAMER LENS)	Device Operates Differently Than Expected; Appropriate Term/Code Not Available	Cataract, Induced; No Code Available	N/A	NA	1	Event Description: THE REPORTER INDICATED THAT THE SURGEON IMPLANTED A 12.6MM VICMO12.6 IMPLANTABLE COLLAMER LENS, -12.00/+0.5/151 DIOPTER, IN THE PATIENT'S LEFT EYE (OS) ON (B)(6) 2016. THE PATIENT EXPERIENCED LENS OPACITY (ANTERIOR SUBCAPSULAR OPACITY - ASCO) ON (B)(6) 2016 AND UNREACTIVE PUPIL (FIXED). THE LENS REMAINS IMPLANTED. Manufacturer Narrative: ADDITIONAL INFORMATION: WORK ORDER SEARC…	Lens Retention	Unknown
https://www.accessdata.fda.gov/scripts/cdrh/cfdocs/cfMAUDE/Detail.CFM?MDRFOI__ID=16474967&pc=MTA	2023826-2023-00725	2022-07-20	Injury	STAAR SURGICAL COMPANY	2023-03-02	MTA	IMPLANTABLE COLLAMER LENS (ICL)	Misfocusing; Adverse Event Without Identified Device or Use Problem	Cataract; Blurred Vision	P030016	NA	1	Event Description: THE REPORTER INDICATED THAT A 12.6MM VTICM512.6 IMPLANTABLE COLLAMER LENS OF A -4.0/1.0/99 (SPHERE/CYLINDER/AXIS) WAS IMPLANTED AS A REPLACEMENT FOR A PATIENT'S RIGHT EYE (OD) ON (B)(6) 2022. THIS WAS DUE TO A EXCESSIVE VAULT AND SIGNIFICANT REDUCTION OF IRIDOCORNEAL ANGLES. THE PROBLEM WAS RESOLVED. REPORTEDLY, "LENS OPACITY (MYDRIASIS WAS NOT MAXIMAL AT THE TIME OF ICL REMOVA…	Lens Retention	Unknown
https://www.accessdata.fda.gov/scripts/cdrh/cfdocs/cfMAUDE/Detail.CFM?MDRFOI__ID=6721163&pc=MTA	2023826-2017-01196	2017-06-07	Injury	STAAR SURGICAL COMPANY	2017-07-18	MTA	IMPLANTABLE COLLAMER LENS (ICL)	Device Dislodged or Dislocated	Cataract; Blurred Vision; No Code Available	NA	NA	1	Event Description: THE REPORTER INDICATED THAT THE SURGEON IMPLANTED A 13.2MM VTICMO13.2 IMPLANTABLE COLLAMER LENS, -16.5/4.5/087 DIOPTER, IN THE PATIENT'S LEFT EYE (OS) ON (B)(6) 2017. THE LENS WAS EXPLANTED ON (B)(6) 2017 DUE TO LENS ROTATION NOT ASSOCIATED WITH LOW VAULT, BLURRED VISION, AND LENS REPOSITIONING. LENS WAS "REMOVED AND CATARACT PROCEDURE HAVE BEEN DONE DUE TO CHANGES ON NATURAL L…	Lens Extraction + Secondary Operation	Unknown
https://www.accessdata.fda.gov/scripts/cdrh/cfdocs/cfMAUDE/Detail.CFM?MDRFOI__ID=6874039&pc=MTA	2023826-2017-01447	2015-08-25	Injury	STAAR SURGICAL COMPANY	2017-09-18	MTA	IMPLANTABLE COLLAMER LENS (ICL)	Device Dislodged or Dislocated; Adverse Event Without Identified Device or Use Problem	Cataract; Blurred Vision; No Code Available	N/A	NA	1	Event Description: THE REPORTER INDICATED THAT THE SURGEON IMPLANT A 13.2 MM VTICMO13.2, -7.0/+4.5/107 DIOPTER, IMPLANTABLE COLLAMER LENS IN THE PATIENT'S RIGHT EYE (OD) ON (B)(6) 2014. ON (B)(6) 2015, THE LENS WAS EXPLANTED DUE TO POST TRAUMATIC DISLOCATION IN A/C AND TRAUMATIC CATARACT DUE TO FIREWORKS MUCH LATER THAN THE IMPLANTATION. IT HAD NO CONNECTION TO THE SURGERY. Manufacturer Narrative…	Lens Extraction + Secondary Operation	Unknown
https://www.accessdata.fda.gov/scripts/cdrh/cfdocs/cfMAUDE/Detail.CFM?MDRFOI__ID=6681259&pc=MTA	2023826-2017-01089	2016-08-08	Injury	STAAR SURGICAL COMPANY AG	2017-06-30	MTA	ICL (IMPLANTABLE COLLAMER LENS)	Device Operates Differently Than Expected	Cataract; Blurred Vision; No Code Available	NA	NA	1	Event Description: THE REPORTER INDICATED THAT THE SURGEON IMPLANTED A 13.2 MM VTICMO13.2 IMPLANTABLE COLLAMER LENS, -2.0/+1.5/40 DIOPTER IN THE PATIENT'S RIGHT EYE (OD) ON (B)(6) 2016. THE LENS WAS EXPLANTED ON (B)(6) 2016 DUE TO REFRACTIVE SURPRISE AND THE DEVELOPMENT OF A CATARACT. A REPOSITIONING OF THE LENS, ENLARGEMENT OF THE INCISION (IN ORDER TO PERFORM CATARACT SURGERY), PHACO-EMULSIFICA…	Lens Extraction + Secondary Operation	Unknown
https://www.accessdata.fda.gov/scripts/cdrh/cfdocs/cfMAUDE/Detail.CFM?MDRFOI__ID=5762131&pc=MTA	2023826-2016-00817	2016-02-09	Injury	STAAR SURGICAL COMPANY	2016-06-30	MTA	ICL (IMPLANTABLE COLLAMER LENS)	Device Operates Differently Than Expected; Appropriate Term/Code Not Available	Cataract; Blurred Vision; No Code Available	N/A	NA	1	Event Description: THE REPORTER INDICATED THAT THE SURGEON IMPLANTED A 12.6MM VTICMO 12.6 IMPLANTABLE COLLAMER LENS, -11.00/ +6.0/100 DIOPTER IN TO THE PATIENT'S RIGHT EYE (OD) ON (B)(6) 2016. THE LENS WAS EXPLANTED ON (B)(6) 2016 DUE TO LENS OPACITY (CORTICAL) BLURRED VISION, THE CATARACT WAS REMOVED, AND A TORIC IOL WAS IMPLANTED. THE PATIENT'S POST-OP BEST CORRECTED VISUAL ACUITY WAS 20/20._x0…	Lens Extraction + Secondary Operation	Unknown
https://www.accessdata.fda.gov/scripts/cdrh/cfdocs/cfMAUDE/Detail.CFM?MDRFOI__ID=4513549&pc=MTA	2023826-2015-00149	2014-11-06	Injury	STAAR SURGICAL COMPANY AG	2015-02-12	MTA	VISIAN ICL (IMPLANTABLE COLLAMER LENS)	Inadequacy of Device Shape and/or Size; Appropriate Term/Code Not Available	Cataract; Blurred Vision; No Code Available	NA	NA	1	Event Description: THE REPORTER INDICATED THE SURGEON IMPLANTED A 12.6MM VTICMO12.6 IMPLANTABLE COLLAMER LENS IN THE PATIENT'S RIGHT EYE (OD) ON (B)(6) 2013. ON (B)(6) 2014 LOW VAULT AND LENS OPACITY WAS OBSERVED AND THE PATIENT EXPERIENCED BLURRED VISON. THE LENS WAS EXCHANGED FOR A LONGER LENGTH WHICH RESOLVED THE VAULTING ISSUE, HOWEVER, THE CATARACT PROGRESED. THE SECOND LENS WAS REMOVED, THE…	Lens Extraction + Secondary Operation	Unknown
https://www.accessdata.fda.gov/scripts/cdrh/cfdocs/cfMAUDE/Detail.CFM?MDRFOI__ID=6247963&pc=MTA	2023826-2017-00071	2011-07-02	Injury	STAAR SURGICAL COMPANY AG	2017-01-12	MTA	ICL (IMPLANTABLE COLLAMER LENS)	Inadequacy of Device Shape and/or Size	Cataract; Blurred Vision; Visual Disturbances; Halo; No Code Available	N/A	NA	1	Event Description: THE REPORTER INDICATED THAT THE SURGEON IMPLANTED A 12.0MM TICM120V4 IMPLANTABLE COLLAMER LENS, -16.00/+1.50/094 DIOPTER, IN THE PATIENT'S LEFT EYE. THE LENS WAS EXPLANTED DUE TO LOW VAULTING, REFRACTIVE SURPRISE, LENS OPACITY, SIGNIFICANT REDUCTION OF ENDOTHELIAL CELL COUNTING OR SIGNIFICANT ENDOTHELIAL CELL LOSS, GLARE/HALOES, AND BLURRED VISION. THE PATIENT UNDERWENT PHACO-E…	Lens Extraction + Secondary Operation	Resolved
https://www.accessdata.fda.gov/scripts/cdrh/cfdocs/cfMAUDE/Detail.CFM?MDRFOI__ID=6129538&pc=MTA	2023826-2016-01682	2016-03-03	Injury	STAAR SURGICAL COMPANY AG	2016-11-28	MTA	ICL (IMPLANTABLE COLLAMER LENS)	Inadequacy of Device Shape and/or Size; Device Operates Differently Than Expected	Cataract; Blurred Vision; Visual Impairment; Visual Disturbances; No Code Available	NA	NA	1	Event Description: THE REPORTER INDICATED THE SURGEON IMPLANTED A 12.6MM VTICMO12.6 IMPLANTABLE COLLAMER LENS, 12.5/+2.00/03 DIOPTER, IN THE PATIENT'S LEFT EYE (OS) ON (B)(6) 2014. THE LENS WAS EXPLANTED ON (B)(6) 2016 DUE TO LENS ROTATION (NOT ASSOCIATED WITH LOW VAULTING), LENS OPACITY, LENS DISLOCATION/SUBLUXATION, REFRACTIVE CHANGE OVER TIME AND BLURRED VISION. THE LENS WAS EXCHANGED FOR A LO…	Lens Exchange	Resolved
https://www.accessdata.fda.gov/scripts/cdrh/cfdocs/cfMAUDE/Detail.CFM?MDRFOI__ID=5694861&pc=MTA	2023826-2016-00799	2016-04-14	Injury	STAAR SURGICAL COMPANY	2016-06-02	MTA	ICL (IMPLANTABLE COLLAMER LENS)	Device Operates Differently Than Expected; Appropriate Term/Code Not Available	Cataract; Cataract, Induced; Blurred Vision; Loss of Vision	N/A	NA	1	Event Description: THE REPORTER INDICATED THAT THE SURGEON IMPLANTED A 12.6MM VTICMO12.6 IMPLANTABLE COLLAMER LENS, -10.5/+1.0/085 DIOPTER, IN THE PATIENT'S LEFT EYE (OS) ON (B)(6) 2016. THE PATIENT EXPERIENCED ASC (ANTERIOR SUBCAPSULAR CATARACT) ON (B)(6) 2016 AND SUBSEQUENTLY LOST BCVA (BEST-CORRECTED VISUAL ACUITY). THE LENS REMAINS IMPLANTED. Manufacturer Narrative: (B)(4). NO SIMILAR COMPLAI…	Lens Retention	Unknown
https://www.accessdata.fda.gov/scripts/cdrh/cfdocs/cfMAUDE/Detail.CFM?MDRFOI__ID=5572298&pc=MTA	2023826-2016-00432	2015-04-13	Injury	STAAR SURGICAL COMPANY	2016-04-12	MTA	ICL (IMPLANTABLE COLLAMER LENS)	Device Operates Differently Than Expected; Appropriate Term/Code Not Available	Cataract; Cataract, Induced; Blurred Vision; Visual Impairment	NA	NA	1	Event Description: THE REPORTER INDICATED THE SURGEON IMPLANTED A 13.2MM VTICMO13.2 IMPLANTABLE COLLAMER LENS, -18.0/+4.0/X010 DIOPTER, IN THE PATIENT'S LEFT EYE (OS) ON (B)(6) 2014. THE REPORTER INDICATED THERE WAS LENS OPACITY (CORTICAL), NOTED ON (B)(6) 2015, AND THE PATIENT EXPERIENCED LOSS OF BCVA. THE LENS REMAINS IMPLANTED. THE PATIENT'S POST-OP BEST-CORRECTED VISUAL ACUITY WAS 20/200._x00…	Lens Retention	Unknown
https://www.accessdata.fda.gov/scripts/cdrh/cfdocs/cfMAUDE/Detail.CFM?MDRFOI__ID=5378618&pc=MTA	2023826-2015-01669	2014-11-21	Injury	STAAR SURGICAL COMPANY AG	2016-01-19	MTA	ICL (IMPLANTABLE COLLAMER LENS)	Device Operates Differently Than Expected; Appropriate Term/Code Not Available	Cataract; Cataract, Induced; No Code Available	NA	NA	1	Event Description: THE REPORTER INDICATED THE SURGEON IMPLANTED A 11.5MM TICM115V4 IMPLANTABLE COLLAMER LENS, -17.0/+3.0/087 DIOPTER, IN THE PATIENT'S LEFT EYE (OS) ON (B)(6) 2011. THE LENS WAS EXPLANTED ON (B)(6) 2015 DUE TO LENS OPACITY (ANTERIOR SUBCAPSULAR). THE LENS WAS EXCHANGED FOR A LONGER LENS AND THE PROBLEM WAS RESOLVED. Manufacturer Narrative: ADDITIONAL INFORMATION: THE PATIENT'S POS…	Lens Exchange	Resolved
https://www.accessdata.fda.gov/scripts/cdrh/cfdocs/cfMAUDE/Detail.CFM?MDRFOI__ID=5671142&pc=MTA	2023826-2016-00741	2015-12-21	Injury	STAAR SURGICAL COMPANY AG	2016-05-23	MTA	ICL (IMPLANTABLE COLLAMER LENS)	Device Operates Differently Than Expected; Appropriate Term/Code Not Available	Cataract; Cataract, Induced; No Code Available	NA	NA	1	Event Description: THE REPORTER INDICATED THE SURGEON IMPLANTED A 13.2MM VTICM13.2 IMPLANTABLE COLLAMER LENS, -12.0/+0.5./X160 DIOPTER, IN THE PATIENT'S LEFT EYE (OS) ON (B)(6) 2012. THE LENS WAS EXPLANTED ON (B)(6) 2016 DUE TO LENS OPACITY (CORTICAL), NOTED ON (B)(6) 2015. THE PATIENT HAD CATARACT SURGERY AND AN INTRAOCULAR LENS WAS IMPLANTED. Manufacturer Narrative: PRODUCT EVALUATION FOUND LEN…	Lens Extraction + Secondary Operation	Unknown
https://www.accessdata.fda.gov/scripts/cdrh/cfdocs/cfMAUDE/Detail.CFM?MDRFOI__ID=5814335&pc=MTA	2023826-2016-00916	2016-04-18	Injury	STAAR SURGICAL COMPANY AG	2016-07-21	MTA	ICL (IMPLANTABLE COLLAMER LENS)	Inadequacy of Device Shape and/or Size; Appropriate Term/Code Not Available	Cataract; Cataract, Induced; No Code Available	NA	NA	1	Event Description: THE REPORTER INDICATED THE SURGEON IMPLANTED A 12.6MM VTICM12.6 IMPLANTABLE COLLAMER LENS, -18.0/+3.5/092 DIOPTER, IN THE PATIENT'S RIGHT EYE (OD) ON (B)(6) 2011. THE LENS WAS EXPLANTED ON (B)(6) 2016 DUE TO LOW VAULTING AND LENS OPACITY (ANTERIOR SUBCAPSULAR)/PERIPHERAL TOUCH. THE LENS WAS EXCHANGED FOR A LONGER LENS AND THE PROBLEM WAS RESOLVED. THE PATIENT'S POST-OP BEST-COR…	Lens Exchange	Resolved
https://www.accessdata.fda.gov/scripts/cdrh/cfdocs/cfMAUDE/Detail.CFM?MDRFOI__ID=7987375&pc=MTA	2023826-2018-01533	2018-08-08	Injury	STAAR SURGICAL COMPANY	2018-10-19	MTA	IMPLANTABLE COLLAMER LENS (ICL)	Inadequacy of Device Shape and/or Size	Cataract; Corneal Edema; Blurred Vision; Halo; No Code Available	NA	NA	1	Event Description: THE REPORTER INDICATED THE SURGEON IMPLANTED A 12.6MM VTICMO12.6 IMPLANTABLE COLLAMER LENS, -5.50/+1.5/060 (SPHERE/CYLINDER/AXIS) IN THE PATIENT'S LEFT EYE (OS), THE LAST WEEK OF (B)(6) 2018. THE REPORTER INDICATED THE PATIENT HAD A FIXED DILATED PUPIL POST-OP, SEVERE CORNEAL EDEMA, WHICH HAS BEEN PERSISTENT UNTIL NOW AND AN ANTERIOR SUBCAPSULAR CATARACT. THE PATIENT EXPERIENCE…	Lens Extraction + Secondary Operation	Resolved
https://www.accessdata.fda.gov/scripts/cdrh/cfdocs/cfMAUDE/Detail.CFM?MDRFOI__ID=6220084&pc=MTA	2023826-2017-00009	2016-03-17	Injury	STAAR SURGICAL COMPANY AG	2017-01-03	MTA	ICL (IMPLANTABLE COLLAMER LENS)	Inadequacy of Device Shape and/or Size	Cataract; Glaucoma; No Code Available	N/A	NA	1	Event Description: THE REPORTER INDICATED THAT THE SURGEON IMPLANTED A 12.5MM TICM125V4 IMPLANTABLE COLLAMER LENS, -14.50/+2.5/087 DIOPTER, IN THE PATIENT'S RIGHT EYE ON (B)(6) 2013. THE LENS WAS EXPLANTED ON (B)(6) 2016 DUE TO LOW VAULTING AND LENS OPACITY. THE LENS WAS EXCHANGED FOR A LONGER LENS AND PROBLEM WAS RESOLVED. Manufacturer Narrative: ADDITIONAL DESCRIPTION: PATIENT'S POST-OP UNCORRE…	Lens Exchange	Resolved
https://www.accessdata.fda.gov/scripts/cdrh/cfdocs/cfMAUDE/Detail.CFM?MDRFOI__ID=4937371&pc=MTA	2023826-2015-00893	2015-03-23	Injury	STAAR SURGICAL COMPANY AG	2015-07-23	MTA	ICL (IMPLANTABLE COLLAMER LENS)	Inadequacy of Device Shape and/or Size	Cataract; Halo; No Code Available	NA	NA	1	Event Description: THE REPORTER INDICATED THE SURGEON IMPLANTED A 12.5MM TICM125V4 IMPLANTABLE COLLAMER LENS IN THE PATIENT'S LEFT EYE (OS) ON (B)(6) 2014. THE LENS WAS EXPLANTED ON (B)(6) 2015 DUE TO LOW VAULTING AND LENS OPACITY, WHICH WAS FIRST NOTED ON (B)(6) 2015. THE REPORTER INDICATED IT WAS AN ANTERIOR SUBCAPSULAR OPACITY. THE PATIENT EXPERIENCED ELEVATED INTRAOCULAR PRESSURE, PIGMENT DIS…	Lens Exchange	Resolved
https://www.accessdata.fda.gov/scripts/cdrh/cfdocs/cfMAUDE/Detail.CFM?MDRFOI__ID=5926670&pc=MTA	2023826-2016-00374	2015-12-17	Injury	STAAR SURGICAL COMPANY	2016-09-02	MTA	ICL (IMPLANTABLE COLLAMER LENS)	Inadequacy of Device Shape and/or Size; Appropriate Term/Code Not Available	Cataract; Intraocular Pressure, Delayed, Uncontrolled; Intraocular Pressure Increased; Blurred Vision; Visual Disturbances; Halo; No Code Available	N/A	NA	1	Event Description: THE REPORTER INDICATED THAT THE SURGEON IMPLANTED A 13.2MM VTICMO13.2 IMPLANTABLE COLLAMER LENS, -13.0/+0.5/088 DIOPTER, IN THE PATIENT'S RIGHT EYE (OD). THE REPORTER INDICATED AT FOLLOW-UP VISITS, THE LENS HAPTIC WAS FOLDED AND THE PUPIL WAS OVALISED. THE LENS WAS TILTED ON ONE SIDE AND WAS RE-POSITIONED. THE LENS REMAINS IMPLANTED._x000D_ Manufacturer Narrative: DEVICE EVALUA…	Lens Repositioning	Unknown
https://www.accessdata.fda.gov/scripts/cdrh/cfdocs/cfMAUDE/Detail.CFM?MDRFOI__ID=7794667&pc=MTA	2023826-2018-01196	2018-05-16	Injury	STAAR SURGICAL COMPANY	2018-08-17	MTA	IMPLANTABLE COLLAMER LENS (ICL)	Adverse Event Without Identified Device or Use Problem; No Apparent Adverse Event	Cataract; No Code Available	NA	NA	1	Event Description: THE REPORTER INDICATED THE SURGEON IMPLANTED A 12.6MM VTICMO12.6 IMPLANTABLE COLLAMER LENS, -15.0/+2.5/084 (SPHERE/CYLINDER/AXIS), IN THE PATIENT'S RIGHT EYE (OD) ON (B)(6) 2018. THE LENS WAS EXPLANTED ON (B)(6) 2018 DUE TO LENS TEAR/BREAK DURING INJECTION INTO THE EYE. ANOTHER LENS WAS IMPLANTED AND THE PROBLEM WAS RESOLVED. ADDITIONAL INFORMATION HAS BEEN REQUESTED BUT NONE H…	Lens Extraction + Secondary Operation	Resolved
https://www.accessdata.fda.gov/scripts/cdrh/cfdocs/cfMAUDE/Detail.CFM?MDRFOI__ID=7300934&pc=MTA	2023826-2018-00292	2015-10-28	Injury	STAAR SURGICAL COMPANY	2018-02-27	MTA	IMPLANTABLE COLLAMER LENS	Device Operates Differently Than Expected	Cataract; No Code Available	N/A	NA	1	Event Description: THE REPORTER STATED THAT THE SURGEON IMPLANTED A 12.6 MM VTICMO12.6, -11.0/+1.0/150 (SPHERE/CYLINDER/AXIS) INTO THE PATIENT'S RIGHT EYE (OD) ON (B)(6) 2013. ON (B)(6) 2017 THE LENS WAS EXPLANTED. THE SURGEON REPORTS LENS OPACITY NS. REPORTEDLY, PHACO-EMULSIFICATION (CATARACT SURGERY) AND IOL IMPLANTATION WAS PERFORMED. THE SURGEON STATES "CATARACT SURGERY PERFORMED. ICL REMOVED…	Lens Extraction + Secondary Operation	Resolved
https://www.accessdata.fda.gov/scripts/cdrh/cfdocs/cfMAUDE/Detail.CFM?MDRFOI__ID=6721184&pc=MTA	2023826-2017-01190	2016-09-12	Injury	STAAR SURGICAL COMPANY	2017-07-18	MTA	ICL (IMPLANTABLE COLLAMER LENS)	Device Operates Differently Than Expected	Cataract; No Code Available	NA	NA	1	Event Description: THE REPORTER INDICATED THAT THE SURGEON IMPLANTED A 13.7 MM VTICM5_13.7 IMPLANTABLE COLLAMER LENS, -10.5/+4/87 DIOPTER, INTO THE PATIENT'S RIGHT EYE (OD) ON (B)(6) 2016. THE PATIENT EXPERIENCED LENS OPACITY (POSTERIOR SUBCAPSULAR CATARACT). ON (B)(6) 2017 THE LENS WAS EXPLANTED FOR PHACO-EMULSIFICATION AND IOL IMPLANTATION. THE PROBLEM WAS RESOLVED. ON (B)(6) 2017, THE PATIENT'…	Lens Extraction + Secondary Operation	Resolved
https://www.accessdata.fda.gov/scripts/cdrh/cfdocs/cfMAUDE/Detail.CFM?MDRFOI__ID=6805946&pc=MTA	2023826-2017-01283	2016-07-25	Injury	STAAR SURGICAL COMPANY	2017-08-18	MTA	IMPLANTABLE COLLAMER LENS (ICL)	Device Operates Differently Than Expected; Adverse Event Without Identified Device or Use Problem	Cataract; No Code Available	N/A	NA	1	Event Description: THE REPORTER INDICATED THAT THE SURGEON IMPLANTED A 12.1MM VTICMO12.1 IMPLANTABLE COLLAMER LENS, -8.0/+2.0/073 DIOPTER, IN THE PATIENT'S LEFT EYE (OS) ON (B)(6) 2016. THE LENS WAS EXPLANTED ON THE SAME DAY DUE TO LENS OPACITY (ASCO). PHACO- EMULSIFACTION WAS PERFORMED AND AN IOL WAS IMPLANTED. THE PATIENT'S BEST CORRECTED VISUAL ACUITY (BCVA) WAS FOUND TO BE 20/20. Manufacturer…	Lens Extraction + Secondary Operation	Resolved
https://www.accessdata.fda.gov/scripts/cdrh/cfdocs/cfMAUDE/Detail.CFM?MDRFOI__ID=6077381&pc=MTA	2023826-2016-01531	2016-04-02	Injury	STAAR SURGICAL COMPANY	2016-11-03	MTA	ICL (IMPLANTABLE COLLAMER LENS)	Inadequacy of Device Shape and/or Size	Cataract; No Code Available	NA	NA	1	Event Description: THE REPORTER INDICATED THE SURGEON IMPLANTED A 12.5MM TICM125V4 IMPLANTABLE COLLAMER LENS - -18.5/+2.0/90 DIOPTER, IN THE PATIENT'S LEFT EYE (OS) ON (B)(6) 2008. THE LENS WAS EXPLANTED ON (B)(6) 2016 DUE TO LOW VAULT AND CATARACT. THE LENS WAS EXCHANGED FOR A LONGER LENS AND THE PROBLEM WAS RESOLVED. THE PATIENT'S POST-OP BEST CORRECTED VISUAL ACUITY WAS 20/15._x000D_ Manufactu…	Lens Exchange	Resolved
https://www.accessdata.fda.gov/scripts/cdrh/cfdocs/cfMAUDE/Detail.CFM?MDRFOI__ID=6074345&pc=MTA	2023826-2016-00912	2016-04-13	Injury	STAAR SURGICAL COMPANY	2016-11-02	MTA	ICL (IMPLANTABLE COLLAMER LENS)	Inadequacy of Device Shape and/or Size	Cataract; No Code Available	NA	NA	1	Event Description: THE REPORTER INDICATED THE SURGEON IMPLANTED A 11.5MM TICM115V4 IMPLANTABLE COLLAMER LENS, -22.50/+3.0/095 DIOPTER, IN THE PATIENT'S RIGHT EYE ON (B)(6) 2016. THE LENS WAS EXPLANTED ON (B)(6) 2016 DUE TO LOW VAULTING AND LENS OPACITY (ANTERIOR SUBCAPSULAR OPACITY)._x000D_ Manufacturer Narrative: PRODUCT EVALUATION FOUND THAT THE LENS WAS RETURNED DRY IN THE LENS CASE/VIAL WITH …	Lens Extraction	Unknown
https://www.accessdata.fda.gov/scripts/cdrh/cfdocs/cfMAUDE/Detail.CFM?MDRFOI__ID=6566884&pc=MTA	2023826-2017-00810	2016-08-16	Injury	STAAR SURGICAL COMPANY	2017-05-15	MTA	ICL (IMPLANTABLE COLLAMER LENS)	Inadequacy of Device Shape and/or Size	Cataract; No Code Available	NA	NA	1	Event Description: THE REPORTER INDICATED THAT THE SURGEON IMPLANTED A 12.6MM VTICMO12.6 IMPLANTABLE COLLAMER LENS, -12.5/+2.0/82 DIOPTER, IN THE PATIENT'S LEFT EYE (OS) ON (B)(6) 2016. THE SURGEON NOTICED LOW VAULTING AND LENS OPACITY (ASCO) EARLY POSTOPERATIVELY. THE LENS WAS EXCHANGED FOR A LONGER LENS OF A DIFFERENT MODEL AND DIOPTER AND THE PROBLEM WAS RESOLVED. ON (B)(6) 2016, PATIENT'S POS…	Lens Exchange	Resolved
https://www.accessdata.fda.gov/scripts/cdrh/cfdocs/cfMAUDE/Detail.CFM?MDRFOI__ID=6590465&pc=MTA	2023826-2017-00825	2016-08-16	Injury	STAAR SURGICAL COMPANY	2017-05-25	MTA	ICL (IMPLANTABLE COLLAMER LENS)	Inadequacy of Device Shape and/or Size	Cataract; No Code Available	N/A	NA	1	Event Description: THE REPORTER INDICATED THAT THE SURGEON IMPLANTED A 12.6MM VTICMO12.6 IMPLANTABLE COLLAMER LENS, -12.0/+1.5/88 DIOPTER, INTO THE PATIENT'S RIGHT EYE (OD) ON (B)(6) 2016. THE PATIENT EXPERIENCED LOW VAULT AND LENS OPACITY (ASCO). THE LENS WAS EXPLANTED ON (B)(6) 2016 AND WAS EXCHANGED WITH A LONGER LENS WITH A DIFFERENT MODEL AND DIOPTER, AND THE PROBLEM WAS RESOLVED. Manufactur…	Lens Exchange	Resolved
https://www.accessdata.fda.gov/scripts/cdrh/cfdocs/cfMAUDE/Detail.CFM?MDRFOI__ID=6059292&pc=MTA	2023826-2016-01530	2016-04-02	Injury	STAAR SURGICAL COMPANY	2016-10-26	MTA	ICL (IMPLANTABLE COLLAMER LENS)	Inadequacy of Device Shape and/or Size; Device Dislodged or Dislocated	Cataract; No Code Available	NA	NA	1	Event Description: THE REPORTER INDICATED THE SURGEON IMPLANTED A 12.5MM TICM125V4 IMPLANTABLE COLLAMER LENS - -18.5/+1.5/78 DIOPTER, IN THE PATIENT'S RIGHT EYE (OD) ON (B)(6) 2008. THE LENS WAS EXPLANTED ON (B)(6) 2016 DUE TO LOW VAULT, LENS ROTATION AND CATARACT. THE LENS WAS EXCHANGED FOR A LONGER LENS AND THE PROBLEM WAS RESOLVED. THE PATIENT'S POST-OP BEST CORRECTED VISUAL ACUITY WAS 20/13._…	Lens Exchange	Resolved
https://www.accessdata.fda.gov/scripts/cdrh/cfdocs/cfMAUDE/Detail.CFM?MDRFOI__ID=6850306&pc=MTA	2023826-2017-01413	2017-05-23	Injury	STAAR SURGICAL COMPANY	2017-09-07	MTA	IMPLANTABLE COLLAMER LENS (ICL)	Insufficient Information	Cataract; No Code Available	NA	NA	1	Event Description: THE REPORTER INDICATED THE SURGEON IMPLANTED A 12.6MM VTICMO12.6 IMPLANTABLE COLLAMER LENS, -16.5/+1.5/107 DIOPTER, IN THE PATIENT'S LEFT EYE (OS) ON (B)(6) 2017. THE LENS WAS EXPLANTED ON (B)(6) 2017 DUE TO LENS OPACITY (ANTERIOR SUBCAPSULAR), WHICH WAS OBSERVED ON (B)(6) 2017. POST CATARACT OPERATION PATIENT IS HAPPY WITH THE VISION. Manufacturer Narrative: DEVICE EVALUATION:…	Lens Extraction + Secondary Operation	Resolved
https://www.accessdata.fda.gov/scripts/cdrh/cfdocs/cfMAUDE/Detail.CFM?MDRFOI__ID=4704662&pc=MTA	2023826-2015-00424	2015-03-16	Injury	STAAR SURGICAL COMPANY	2015-04-17	MTA	ICL (IMPLANTABLE COLLAMER LENS)	Inadequacy of Device Shape and/or Size; Appropriate Term/Code Not Available	Cataract; Uveitis; Discomfort; No Code Available	NA	NA	1	Event Description: THE REPORTER INDICATED THE SURGEON IMPLANTED A 13.7MM VTICMO13.7 IMPLANTABLE COLLAMER LENS IN THE PATIENT'S RIGHT EYE (OD) ON (B)(6) 2015. THE LENS WAS EXPLANTED ON (B)(6) 2015 DUE TO EXCESSIVE VAULTING AND SIGNIFICANT REDUCTION OF IRIDO-CORNEAL ANGLES. DURING EXPLANTATION, ANTERIOR SUBCAPSULAR OPACITIES SUDDENLY DEVELOPED. THE PATIENT EXPERIENCED DISCOMFORT, LIGHT SENSITIVITY …	Lens Extraction	Resolved
https://www.accessdata.fda.gov/scripts/cdrh/cfdocs/cfMAUDE/Detail.CFM?MDRFOI__ID=4704665&pc=MTA	2023826-2015-00425	2015-03-16	Injury	STAAR SURGICAL COMPANY	2015-04-17	MTA	ICL (IMPLANTABLE COLLAMER LENS)	Inadequacy of Device Shape and/or Size; Appropriate Term/Code Not Available	Cataract; Uveitis; Halo; Discomfort; No Code Available	NA	NA	1	Event Description: THE REPORTER INDICATED THE SURGEON IMPLANTED A 13.7MM VTICMO13.7 IMPLANTABLE COLLAMER LENS IN THE PATIENT'S LEFT EYE (OS) ON (B)(6) 2015. THE LENS WAS EXPLANTED ON (B)(6) 2015 DUE TO EXCESSIVE VAULTING AND SIGNIFICANT REDUCTION OF IRIDO-CORNEAL ANGLES. DURING EXPLANTATION, ANTERIOR SUBCAPSULAR OPACITIES SUDDENLY DEVELOPED. THE PATIENT EXPERIENCED PIGMENT DISPERSION, GLARE/HALOS…	Lens Extraction	Resolved
