# Supplementary material for: Adverse events associated with Implantable Collamer Lens: insights from the FDA MAUDE database
Source: Front Med (Lausanne). 2025 Jul 21;12:1613060. doi: 10.3389/fmed.2025.1613060 (PMC12319018; doi:10.3389/fmed.2025.1613060)
Supplement: Supplementary file 15 [file Table_14.XLSX]

## Sheet: Vision Issue-1
Web Address	Report Number	Event Date	Event Type	Manufacturer	Date Received	Product Code...35	Brand Name	Device Problem	Patient Problem	PMA/PMN Number	Exemption Number	Number of Events	Event Text	Management	Outcomes
https://www.accessdata.fda.gov/scripts/cdrh/cfdocs/cfMAUDE/Detail.CFM?MDRFOI__ID=8372525&pc=QCB	2023826-2019-00315	2019-01-31 05:00:00	Malfunction	STAAR SURGICAL COMPANY	2019-02-26 05:00:00	QCB	IMPLANTABLE COLLAMER LENS	Misfocusing; Off-Label Use	Blurred Vision	N/A	NA	1	Event Description: THE REPORTER STATED THAT THE SURGEON IMPLANTED A 13.2MM VTICM5_13.2 IMPLANTABLE COLLAMER LENS, -5.0/+2.5/146 (SPHERE/CYLINDER/AXIS) INTO THE PATIENT'S LEFT EYE (OS) ON (B)(6) 2018. THE SURGEON REPORTS REFRACTIVE SURPRISE. REPORTEDLY, LENS REMAINS IMPLANTED. THE CAUSE OF THE EVENT IS REPORTED AS UNKNOWN. Manufacturer Narrative: LENS WORK ORDER SEARCH: NO SIMILAR COMPLAINT TYPE E…	Lens Retention	Unknown
https://www.accessdata.fda.gov/scripts/cdrh/cfdocs/cfMAUDE/Detail.CFM?MDRFOI__ID=8498014&pc=QCB	2023826-2019-00583	NA	Malfunction	STAAR SURGICAL COMPANY	2019-04-09	QCB	IMPLANTABLE COLLAMER LENS (ICL)	Misfocusing; Inadequacy of Device Shape and/or Size	Blurred Vision	N/A	NA	1	Event Description: THE REPORTER INDICATED THE SURGEON IMPLANTED A 13.2MM VTICM5_13.2 IMPLANTABLE COLLAMER LENS, -12.5/+1.0/084 (SPHERE/CYLINDER/AXIS) INTO THE PATIENT'S LEFT EYE (OS) ON (B)(6) 2019. THE SURGEON REPORTS THE VAULT IS A "BIT HIGH" AND THAT THE PATIENT COMPLAINS OF BLURRED VISION IN SLIGHTLY DIM LIGHTING "LIKE A LAYER OF OIL COVERED ON YOUR GLASSES." LENS REMAINS IMPLANTED. Manufactu…	Lens Retention	Unknown
https://www.accessdata.fda.gov/scripts/cdrh/cfdocs/cfMAUDE/Detail.CFM?MDRFOI__ID=8511547&pc=QCB	2023826-2019-00600	2019-03-04	Malfunction	STAAR SURGICAL COMPANY	2019-04-12	QCB	IMPLANTABLE COLLAMER LENS (ICL)	Misfocusing; Device Dislodged or Dislocated	Blurred Vision	NA	NA	1	Event Description: THE REPORTER INDICATED THE SURGEON IMPLANTED A 13.2MM VTICMO13.2 IMPLANTABLE COLLAMER LENS, -11.0/+4.0/090 (SPHERE/CYLINDER/AXIS), IN THE PATIENTS RIGHT EYE (OD), ON (B)(6) 2019. THE REPORTER INDICATED THERE WAS LENS ROTATION NOT ASSOCIATED TO A LOW VAULT AND THE PATIENT EXPERIENCED A REFRACTIVE SURPRISE. THE LENS REMAINS IMPLANTED. Manufacturer Narrative: THIS PRODUCT IS MANUF…	Lens Retention	Unknown
https://www.accessdata.fda.gov/scripts/cdrh/cfdocs/cfMAUDE/Detail.CFM?MDRFOI__ID=8511615&pc=QCB	2023826-2019-00601	2019-03-04	Malfunction	STAAR SURGICAL COMPANY	2019-04-12	QCB	IMPLANTABLE COLLAMER LENS (ICL)	Misfocusing; Device Dislodged or Dislocated	Blurred Vision	NA	NA	1	Event Description: THE REPORTER INDICATED THE SURGEON IMPLANTED A 13.2MM VTICMO13.2 IMPLANTABLE COLLAMER LENS, -10.0/+4.0/092 (SPHERE/CYLINDER/AXIS), IN THE PATIENTS LEFT EYE (OS), ON (B)(6) 2019. THE REPORTER INDICATED THERE WAS LENS ROTATION NOT ASSOCIATED TO A LOW VAULT AND THE PATIENT EXPERIENCED A REFRACTIVE SURPRISE. THE LENS REMAINS IMPLANTED. Manufacturer Narrative: THIS PRODUCT IS MANUFA…	Lens Retention	Unknown
https://www.accessdata.fda.gov/scripts/cdrh/cfdocs/cfMAUDE/Detail.CFM?MDRFOI__ID=8519002&pc=QCB	2023826-2019-00613	NA	Malfunction	STAAR SURGICAL COMPANY	2019-04-16 04:00:00	QCB	IMPLANTABLE COLLAMER LENS (ICL)	Misfocusing	Blurred Vision	N/A	NA	1	Event Description: THE REPORTER INDICATED THE SURGEON IMPLANTED A 13.2MM VTICM5_13.2 IMPLANTABLE COLLAMER LENS, -11.5/+1.0/104 (SPHERE/CYLINDER/AXIS) INTO THE PATIENT'S RIGHT EYE (OD). THE SURGEON REPORTS AN UNEXPECTED RESIDUAL REFRACTION OF -1.25 CYL POSTOPERATIVELY. LENS REMAINS IMPLANTED. ATTEMPTS TO OBTAIN ADDITIONAL INFORMATION HAVE NOT BEEN SUCCESSFUL. Manufacturer Narrative: IMPLANT DATE: …	Lens Retention	Unknown
https://www.accessdata.fda.gov/scripts/cdrh/cfdocs/cfMAUDE/Detail.CFM?MDRFOI__ID=8524100&pc=QCB	2023826-2019-00619	2018-09-05	Malfunction	STAAR SURGICAL COMPANY	2019-04-17	QCB	IMPLANTABLE COLLAMER LENS (ICL)	Misfocusing	Blurred Vision	N/A	NA	1	Event Description: THE REPORTER INDICATED THAT A 13.2MM,VTICM5_13.2, -11.0/5.0/086 (SPHERE/CYLINDER/AXIS), IMPLANTABLE COLLAMER LENS WAS IMPLANTED INTO THE PATIENTS LEFT EYE (OS) ON (B)(6) 2018 AND REFRACTIVE SURPRISE HAS BEEN OBSERVED. THE REPORTER STATED THAT THE LENS REMIANS IMPLANTED WITH POOR VA (VISUAL ACUITY). PATIENT BCVA 1.0 WITH OVER CORRECTION +0.75-1.25X63. IF ADDITIONAL INFORMATION I…	Lens Retention	Unknown
https://www.accessdata.fda.gov/scripts/cdrh/cfdocs/cfMAUDE/Detail.CFM?MDRFOI__ID=8611967&pc=QCB	2023826-2019-00675	2019-04-03	Malfunction	STAAR SURGICAL COMPANY	2019-05-15	QCB	IMPLANTABLE COLLAMER LENS (ICL)	Misfocusing	Blurred Vision	N/A	NA	1	Event Description: THE REPORTER INDICATED THAT A 13.2MM, VTICM5_13.2, -12.50/2.0/090 (SPHERE/CYLINDER/AXIS), IMPLANTABLE COLLAMER LENS WAS IMPLANTED INTO THE PATIENT'S RIGHT EYE (OD) ON (B)(6) 2019. REFRACTIVE SURPRISE WAS OBSERVED, THE LENS REMAINS IMPLANTED. THE DOCTOR STATES "THE PATIENT IS HAPPY." ADDITIONAL INFORMATION HAS BEEN REQUESTED BUT NONE HAS BEEN FORTHCOMING. IF ADDITIONAL INFORMATI…	Lens Retention	Resolved
https://www.accessdata.fda.gov/scripts/cdrh/cfdocs/cfMAUDE/Detail.CFM?MDRFOI__ID=8692892&pc=QCB	2023826-2019-01070	2017-10-19	Malfunction	STAAR SURGICAL COMPANY	2019-06-12	QCB	IMPLANTABLE COLLAMER LENS	Misfocusing	Blurred Vision	N/A	NA	1	Event Description: THE REPORTER STATED THAT THE SURGEON IMPLANTED A 12.6MM VTICM5_12.6, -3.0/+0.5/077 (SPHERE/CYLINDER/AXIS) INTO THE PATIENT'S LEFT EYE (OS) ON (B)(6) 2017. THE SURGEON REPORTS REFRACTIVE SURPRISE. REPORTEDLY, LENS REMAINS IMPLANTED. Manufacturer Narrative: THIS PRODUCT IS MANUFACTURED IN THE U.S. BUT NOT MARKETED IN THE U.S. LENS WORK ORDER SEARCH: NO SIMILAR COMPLAINT TYPE EVEN…	Lens Retention	Unknown
https://www.accessdata.fda.gov/scripts/cdrh/cfdocs/cfMAUDE/Detail.CFM?MDRFOI__ID=8708611&pc=QCB	2023826-2019-01090	2019-02-05 05:00:00	Injury	STAAR SURGICAL COMPANY	2019-06-18 04:00:00	QCB	IMPLANTABLE COLLAMER LENS (ICL)	Misfocusing; Inadequacy of Device Shape and/or Size	Blurred Vision	N/A	NA	1	Event Description: THE REPORTER INDICATED THAT A 12.1MM, VTICM5_12.1MM, -1.00/1.0/032 (SPHERE/CYLINDER/AXIS), IMPLANTABLE COLLAMER LENS WAS IMPLANTED INTO THE PATIENTS RIGHT EYE (OD) ON (B)(6) 2019. LOW VAULT AND REFRACTIVE SURPRISE WAS OBSERVED. THE REPORTER STATED " THE PATIENT HAD A SMALL REFRACTIVE ERROR ON THE RIGHT EYE PRE-OP, BUT IT HAS BEEN WORSE AFTER ICL IMPLANT ". ADDITIONAL INFORMATIO…	Lens Retention	Unknown
https://www.accessdata.fda.gov/scripts/cdrh/cfdocs/cfMAUDE/Detail.CFM?MDRFOI__ID=8708784&pc=QCB	2023826-2019-01091	2019-01-15 05:00:00	Injury	STAAR SURGICAL COMPANY	2019-06-18 04:00:00	QCB	IMPLANTABLE COLLAMER LENS (ICL)	Misfocusing; Inadequacy of Device Shape and/or Size; Device Dislodged or Dislocated	Blurred Vision	N/A	NA	1	Event Description: THE REPORTER INDICATED THAT A 12.1MM, VTICM5_12.1MM, -2.00/2.0/159 (SPHERE/CYLINDER/AXIS), IMPLANTABLE COLLAMER LENS WAS IMPLANTED INTO THE PATIENTS LEFT EYE (OS) ON (B)(6) 2019. LOW VAULT WITH ROTATION AND REFRACTIVE SURPRISE WAS OBSERVED. ADDITIONAL INFORMATION HAS BEEN REQUESTED BUT NONE HAS BEEN FORTHCOMING. IF ADDITIONAL INFORMATION IS RECEIVED A SUPPLEMENTAL MEDWATCH REPO…	Unknown	Unknown
https://www.accessdata.fda.gov/scripts/cdrh/cfdocs/cfMAUDE/Detail.CFM?MDRFOI__ID=8773867&pc=QCB	2023826-2019-01187	2019-03-22 04:00:00	Malfunction	STAAR SURGICAL COMPANY	2019-07-09 04:00:00	QCB	IMPLANTABLE COLLAMER LENS (ICL)	Misfocusing; Off-Label Use	Blurred Vision	N/A	NA	1	Event Description: THE REPORTER INDICATED THAT A 13.2MM, VTICMO13.2, -15.5/1.0/144 (SPHERE/CYLINDER/AXIS), IMPLANTABLE COLLAMER LENS WAS IMPLANTED INTO THE PATIENTS RIGHT EYE (OD) IN (B)(6) 2019 AND REFRACTIVE SURPRISE WAS OBSERVED. PATIENT IS UNHAPPY WITH NEAR VISION, AWAITING ICL EXCHANGE FOR HYPEROPIC SURPRISE. ADDITIONAL INFORMATION HAS BEEN REQUESTED FOR THIS CASE. IF ADDITIONAL INFORMATION …	Lens Retention	Unknown
https://www.accessdata.fda.gov/scripts/cdrh/cfdocs/cfMAUDE/Detail.CFM?MDRFOI__ID=8795444&pc=QCB	2023826-2019-01242	2019-05-20	Malfunction	STAAR SURGICAL COMPANY	2019-07-16	QCB	IMPLANTABLE COLLAMER LENS (ICL)	Misfocusing	Blurred Vision	NA	NA	1	Event Description: THE REPORTER INDICATED THAT THE SURGEON IMPLANTED A 12.6MM VTICMO12.6 IMPLANTABLE COLLAMER LENS, -17.0/+2.0/080 (SPHERE/CYLINDER/AXIS), INTO THE PATIENT'S LEFT EYE (OS) ON (B)(6) 2019. THE SURGEON REPORTS REFRACTIVE SURPRISE AND BLURRED VISION. REPORTEDLY, THE LENS REMAINS IMPLANTED. Manufacturer Narrative: THIS PRODUCT IS MANUFACTURED IN THE U.S. BUT NOT MARKETED IN THE U.S. N…	Lens Retention	Unknown
https://www.accessdata.fda.gov/scripts/cdrh/cfdocs/cfMAUDE/Detail.CFM?MDRFOI__ID=8798875&pc=QCB	2023826-2019-01267	2019-06-17	Malfunction	STAAR SURGICAL COMPANY	2019-07-17	QCB	IMPLANTABLE COLLAMER LENS (ICL)	Misfocusing	Blurred Vision	N/A	NA	1	Event Description: THE REPORTER INDICATED THAT A 13.2MM, VTICM5_13.2, -0.50/6.0/098 (SPHERE/CYLINDER/AXIS), IMPLANTABLE COLLAMER LENS WAS IMPLANTED INTO THE PATIENTS RIGHT EYE (OD) AND REFRACTIVE SURPRISE WAS OBSERVED. LENS REMAINS IMPLANTED. ADDITIONAL INFORMATION HAS BEEN REQUESTED BUT NONE HAS BEEN FORTHCOMING. IF ADDITIONAL INFORMATION IS RECEIVED A SUPPLEMENTAL MEDWATCH REPORT WILL BE SUBMIT…	Lens Retention	Unknown
https://www.accessdata.fda.gov/scripts/cdrh/cfdocs/cfMAUDE/Detail.CFM?MDRFOI__ID=8798976&pc=QCB	2023826-2019-01266	2019-06-17	Malfunction	STAAR SURGICAL COMPANY	2019-07-17	QCB	IMPLANTABLE COLLAMER LENS (ICL)	Misfocusing	Blurred Vision	N/A	NA	1	Event Description: THE REPORTER INDICATED THAT A 13.2MM, VTICM5_13.2, -0.50/6.0/076 (SPHERE/CYLINDER/AXIS), IMPLANTABLE COLLAMER LENS WAS IMPLANTED INTO THE PATIENTS LEFT EYE (OS) AND REFRACTIVE SURPRISE WAS OBSERVED. LENS REMAINS IMPLANTED. ADDITIONAL INFORMATION HAS BEEN REQUESTED BUT NONE HAS BEEN FORTHCOMING. IF ADDITIONAL INFORMATION IS RECEIVED A SUPPLEMENTAL MEDWATCH REPORT WILL BE SUBMITT…	Lens Retention	Unknown
https://www.accessdata.fda.gov/scripts/cdrh/cfdocs/cfMAUDE/Detail.CFM?MDRFOI__ID=8813862&pc=QCB	2023826-2019-01290	2019-05-04	Malfunction	STAAR SURGICAL COMPANY	2019-07-22	QCB	IMPLANTABLE COLLAMER LENS (ICL)	Misfocusing	Blurred Vision	NA	NA	1	Event Description: THE REPORTER INDICATED THAT THE SURGEON IMPLANTED A 13.2MM VTICMO13.2 IMPLANTABLE COLLAMER LENS, -17.5/+1.5/020 (SPHERE/CYLINDER/AXIS), INTO THE PATIENT'S LEFT EYE (OS) ON (B)(6) 2018. THE SURGEON REPORTS REFRACTIVE SURPRISE. THE CAUSE OF THE EVENT IS REPORTED AS UNKNOWN. REPORTEDLY, THE LENS REMAINS IMPLANTED. Manufacturer Narrative: THIS PRODUCT IS MANUFACTURED IN THE U.S. BU…	Lens Retention	Unknown
https://www.accessdata.fda.gov/scripts/cdrh/cfdocs/cfMAUDE/Detail.CFM?MDRFOI__ID=8813865&pc=QCB	2023826-2019-01289	2019-05-04	Malfunction	STAAR SURGICAL COMPANY	2019-07-22	QCB	IMPLANTABLE COLLAMER LENS (ICL)	Misfocusing	Blurred Vision	NA	NA	1	Event Description: THE REPORTER INDICATED THAT THE SURGEON IMPLANTED A 13.2MM VTICMO13.2 IMPLANTABLE COLLAMER LENS, -18.0/+2.0/139 (SPHERE/CYLINDER/AXIS), INTO THE PATIENT'S RIGHT EYE (OD) ON (B)(6) 2018. THE SURGEON REPORTS REFRACTIVE SURPRISE. THE CAUSE OF THE EVENT IS REPORTED AS UNKNOWN. REPORTEDLY, THE LENS REMAINS IMPLANTED. Manufacturer Narrative: THIS PRODUCT IS MANUFACTURED IN THE U.S. B…	Lens Retention	Unknown
https://www.accessdata.fda.gov/scripts/cdrh/cfdocs/cfMAUDE/Detail.CFM?MDRFOI__ID=8852208&pc=QCB	2023826-2019-01323	NA	Malfunction	STAAR SURGICAL COMPANY	2019-08-01	QCB	IMPLANTABLE COLLAMER LENS (ICL)	Misfocusing	Blurred Vision	NA	NA	1	Event Description: THE REPORTER INDICATED THE SURGEON IMPLANTED A 13.2MM VTICMO13.2 IMPLANTABLE COLLAMER LENS, -15.00/+2.5/141 (SPHERE/CYLINDER/AXIS) IN THE PATIENT'S RIGHT EYE (OD). THE REPORTER INDICATED THE PATIENT EXPERIENCED A REFRACTIVE SURPRISE AND THE LENS REMAINS IMPLANTED. THE CAUSE OF THE EVENT WAS UNKNOWN. ADDITIONAL INFORMATION HAS BEEN REQUESTED BUT NONE HAS BEEN FORTHCOMING. IF ADD…	Lens Retention	Unknown
https://www.accessdata.fda.gov/scripts/cdrh/cfdocs/cfMAUDE/Detail.CFM?MDRFOI__ID=8852214&pc=QCB	2023826-2019-01324	NA	Malfunction	STAAR SURGICAL COMPANY	2019-08-01	QCB	IMPLANTABLE COLLAMER LENS (ICL)	Misfocusing	Blurred Vision	NA	NA	1	Event Description: THE REPORTER INDICATED THE SURGEON IMPLANTED A 13.2MM VTICMO13.2 IMPLANTABLE COLLAMER LENS, -18.00/+3.5/079 (SPHERE/CYLINDER/AXIS) IN THE PATIENT'S LEFT EYE (OS). THE REPORTER INDICATED THE PATIENT EXPERIENCED A REFRACTIVE SURPRISE AND THE LENS REMAINS IMPLANTED. THE CAUSE OF THE EVENT WAS UNKNOWN. ADDITIONAL INFORMATION HAS BEEN REQUESTED BUT NONE HAS BEEN FORTHCOMING. IF ADDI…	Lens Retention	Unknown
https://www.accessdata.fda.gov/scripts/cdrh/cfdocs/cfMAUDE/Detail.CFM?MDRFOI__ID=8871962&pc=QCB	2023826-2019-01395	2019-05-25 04:00:00	Injury	STAAR SURGICAL COMPANY	2019-08-07 04:00:00	QCB	IMPLANTABLE COLLAMER LENS (ICL)	Misfocusing	Blurred Vision	NA	NA	1	Event Description: THE REPORTER INDICATED THE SURGEON IMPLANTED A 13.2MM VTICM5_13.2 IMPLANTABLE COLLAMER LENS, -13.0/+2.0/090 (SPHERE/CYLINDER/AXIS), IN THE PATIENTS RIGHT EYE (OD), ON (B)(6) 2019. THE PATIENT EXPERIENCED A REFRACTIVE SURPRISE AND THE LENS REMAINS IMPLANTED. THE REPORTER INDICATED THE CAUSE OF THE EVENT WAS UNKNOWN. Manufacturer Narrative: B5: THE LENS WAS EXPLANTED ON (B)(6) 20…	Lens Exchange	Resolved
https://www.accessdata.fda.gov/scripts/cdrh/cfdocs/cfMAUDE/Detail.CFM?MDRFOI__ID=8894318&pc=QCB	2023826-2019-01433	NA	Injury	STAAR SURGICAL COMPANY	2019-08-14	QCB	IMPLANTABLE COLLAMER LENS (ICL)	Misfocusing	Blurred Vision	NA	NA	1	Event Description: THE REPORTER INDICATED THAT THE SURGEON IMPLANTED A 12.6MM VTICMO12.6 IMPLANTABLE COLLAMER LENS, -17.5/+3.0/111 (SPHERE/CYLINDER/AXIS), INTO THE PATIENT'S LEFT EYE (OS). THE SURGEON REPORTS REFRACTIVE SURPRISE. LOSS OF BCVA IS ALSO REPORTED, HOWEVER THE PRE-OP BCVA IS LISTED AS "?" AND POST-OP IS "20/25 GLASSES." THE CAUSE OF THE EVENT IS REPORTED AS UNKNOWN. REPORTEDLY, THE LE…	Lens Retention	Unknown
https://www.accessdata.fda.gov/scripts/cdrh/cfdocs/cfMAUDE/Detail.CFM?MDRFOI__ID=8966498&pc=QCB	2023826-2019-01648	2019-07-31 04:00:00	Malfunction	STAAR SURGICAL COMPANY	2019-09-05 04:00:00	QCB	IMPLANTABLE COLLAMER LENS	Misfocusing; Off-Label Use	Blurred Vision	N/A	NA	1	Event Description: THE REPORTER STATED THAT THE SURGEON IMPLANTED A 13.2MM VTICM5_13.2, -0.5/+6.0/092 (SPHERE/CYLINDER/AXIS) INTO THE PATIENT'S LEFT EYE (OS) ON (B)(6) 2019. THE SURGEON REPORTS REFRACTIVE SURPRISE AND THAT UCVA HAS WORSENED FROM THE 1ST WEEK OF SURGERY. REPORTEDLY, LENS REMAINS IMPLANTED. Manufacturer Narrative: METHOD CODE 4110: NO ADDITIONAL SIMILAR COMPLAINT TYPE EVENT(S) WITH…	Lens Retention	Unknown
https://www.accessdata.fda.gov/scripts/cdrh/cfdocs/cfMAUDE/Detail.CFM?MDRFOI__ID=9088369&pc=QCB	2023826-2019-01670	2019-07-03	Malfunction	STAAR SURGICAL COMPANY	2019-09-19	QCB	IMPLANTABLE COLLAMER LENS (ICL)	Misfocusing	Blurred Vision	N/A	NA	1	Event Description: THE REPORTER INDICATED THAT A 12.1MM, VTICM5_12.1, -9.50/3.5/079 (SPHERE/CYLINDER/AXIS), IMPLANTABLE COLLAMER LENS WAS IMPLANTED INTO THE PATIENT'S RIGHT EYE (OD) ON (B)(6) 2019. REFRACTIVE SURPRISE WAS OBSERVED, THE LENS REMAINS IMPLANTED. ADDITIONAL INFORMATION HAS BEEN REQUESTED BUT NONE HAS BEEN FORTHCOMING. IF ADDITIONAL INFORMATION IS RECEIVED A SUPPLEMENTAL MEDWATCH REPO…	Lens Retention	Unknown
https://www.accessdata.fda.gov/scripts/cdrh/cfdocs/cfMAUDE/Detail.CFM?MDRFOI__ID=9136940&pc=QCB	2023826-2019-01809	2019-08-30	Malfunction	STAAR SURGICAL COMPANY	2019-09-30	QCB	IMPLANTABLE COLLAMER LENS	Misfocusing	Blurred Vision	N/A	NA	1	Event Description: THE REPORTER STATED THAT THE SURGEON IMPLANTED A 13.2MM VTICM5_13.2, -3.5/+6.0/118 (SPHERE/CYLINDER/AXIS) INTO THE PATIENT'S RIGHT EYE (OD) ON (B)(6) 2019. THE SURGEON REPORTS REFRACTIVE SURPRISE. REPORTEDLY, THE LENS REMAINS IMPLANTED AND NO SURGICAL INTERVENTION WILL BE PERFORMED AS "PATIENT IS HAPPY." THE CAUSE OF THE EVENT IS REPORTED AS UNKNOWN. Manufacturer Narrative: WEI…	Lens Retention	Unknown
https://www.accessdata.fda.gov/scripts/cdrh/cfdocs/cfMAUDE/Detail.CFM?MDRFOI__ID=9148352&pc=QCB	2023826-2019-01853	NA	Malfunction	STAAR SURGICAL COMPANY	2019-10-02	QCB	IMPLANTABLE COLLAMER LENS (ICL)	Misfocusing	Blurred Vision	N/A	NA	1	Event Description: THE REPORTER INDICATED THAT A PATIENT WITH POST LASIK ECTASIA WHO HE CROSS LINKED AND IMPLANTED 13.7MM, VTICMO13.7, -2.00/4.0/160 (SPHERE/CYLINDER/AXIS), IMPLANTABLE COLLAMER LENS INTO THE RIGHT EYE (OD) HAD AN EXCELLENT OUTCOME, BUT OVER THE PAST 2 YEARS HIS CORNEAL SHAPE HAS CHANGED SLIGHTLY AND HAS BECOME MORE MYOPIC. PATIENT HAS NO CATARACT AND HIS CORNEAL ENDOTHELIAL CELL …	Lens Retention	Unknown
https://www.accessdata.fda.gov/scripts/cdrh/cfdocs/cfMAUDE/Detail.CFM?MDRFOI__ID=9454032&pc=QCB	2023826-2019-02344	2019-09-30 04:00:00	Malfunction	STAAR SURGICAL COMPANY	2019-12-11 05:00:00	QCB	IMPLANTABLE COLLAMER LENS (ICL)	Misfocusing	Blurred Vision	N/A	NA	1	Event Description: THE REPORTER INDICATED THAT THE SURGEON IMPLANTED A 12.6MM, VTICM5_12.6, -8.50/0.5/101 (SPHERE/CYLINDER/AXIS) IMPLANTABLE COLLAMER LENS INTO THE PATIENTS RIGHT EYE (OD) ON (B)(6) 2019. IT WAS REPORTED THAT THE PATIENT EXPERIENCED REFRACTIVE SURPRISE. LENS REMAINS IMPLANTED. IF ADDITIONAL INFORMATION IS RECEIVED A SUPPLEMENTAL MEDWATCH REPORT WILL BE SUBMITTED. Manufacturer Narr…	Lens Retention	Unknown
https://www.accessdata.fda.gov/scripts/cdrh/cfdocs/cfMAUDE/Detail.CFM?MDRFOI__ID=9469760&pc=QCB	2023826-2019-02383	NA	Malfunction	STAAR SURGICAL COMPANY	2019-12-13	QCB	IMPLANTABLE COLLAMER LENS (ICL)	Misfocusing	Blurred Vision	NA	NA	1	Event Description: THE REPORTER INDICATED THE SURGEON IMPLANTED A 12.6MM VTICMO12.6 IMPLANTABLE COLLAMER LENS, -15.00/+1.5/065 (SPHERE/CYLINDER/AXIS) IN THE PATIENTS LEFT EYE (OS) ON (B)(6) 2019. THE REPORTER INDICATED THE PATIENT EXPERIENCED A REFRACTIVE SURPRISE. THE LENS REMAINS IMPLANTED. ADDITIONAL INFORMATION HAS BEEN REQUESTED BUT NONE HAS BEEN FORTHCOMING. IF ADDITIONAL INFORMATION IS REC…	Lens Retention	Unknown
https://www.accessdata.fda.gov/scripts/cdrh/cfdocs/cfMAUDE/Detail.CFM?MDRFOI__ID=9476270&pc=QCB	2023826-2019-02391	2019-11-05 05:00:00	Malfunction	STAAR SURGICAL COMPANY	2019-12-16 05:00:00	QCB	IMPLANTABLE COLLAMER LENS (ICL)	Misfocusing	Blurred Vision	NA	NA	1	Event Description: THE REPORTER INDICATED THAT THE SURGEON IMPLANTED A 13.2MM VTICMO13.2 IMPLANTABLE COLLAMER LENS, -2.5/+3.5/104 (SPHERE/CYLINDER/AXIS), INTO THE PATIENT'S RIGHT EYE (OD) ON (B)(6)2019. THE SURGEON REPORTS REFRACTIVE SURPRISE. REPORTEDLY, THE LENS REMAINS IMPLANTED. Manufacturer Narrative: ADDITIONAL INFORMATION: B5 - POSTOPERATIVE REPORT INDICATED PATIENT'S IOP IS STABLE AND REP…	Lens Retention	Unknown
https://www.accessdata.fda.gov/scripts/cdrh/cfdocs/cfMAUDE/Detail.CFM?MDRFOI__ID=9476271&pc=QCB	2023826-2019-02390	2019-11-05 05:00:00	Malfunction	STAAR SURGICAL COMPANY	2019-12-16 05:00:00	QCB	IMPLANTABLE COLLAMER LENS (ICL)	Misfocusing	Blurred Vision	NA	NA	1	Event Description: THE REPORTER INDICATED THAT THE SURGEON IMPLANTED A 13.2MM VTICMO13.2 IMPLANTABLE COLLAMER LENS, -2.5/+4.5/079 (SPHERE/CYLINDER/AXIS), INTO THE PATIENT'S LEFT EYE (OS) ON (B)(6)2019. THE SURGEON REPORTS REFRACTIVE SURPRISE. REPORTEDLY, THE LENS REMAINS IMPLANTED. Manufacturer Narrative: ADDITIONAL INFORMATION: B5 - POSTOPERATIVE REPORT STATED PATIENT'S IOP IS STABLE AND REPORTS…	Lens Retention	Unknown
https://www.accessdata.fda.gov/scripts/cdrh/cfdocs/cfMAUDE/Detail.CFM?MDRFOI__ID=9476283&pc=QCB	2023826-2019-02389	2017-01-21 05:00:00	Malfunction	STAAR SURGICAL COMPANY	2019-12-16 05:00:00	QCB	IMPLANTABLE COLLAMER LENS (ICL)	Misfocusing	Blurred Vision	NA	NA	1	Event Description: THE REPORTER INDICATED THAT THE SURGEON IMPLANTED A 12.1MM VTICMO12.1 IMPLANTABLE COLLAMER LENS, -13.5/+2.0/104 (SPHERE/CYLINDER/AXIS), INTO THE PATIENT'S RIGHT EYE (OD). THE SURGEON REPORTS "HYPEROPIC SHIFT 2D." Manufacturer Narrative: B5-ADDITIONAL INFORMATION: THE REPORTER STATES THE "PATIENT HAS REFRACTIVE CHANGES 'SIGNIFICANT' OVER TIME AFTER 3 YEARS OF ICL IMPLANTATION." …	Lens Retention	Unknown
https://www.accessdata.fda.gov/scripts/cdrh/cfdocs/cfMAUDE/Detail.CFM?MDRFOI__ID=9491791&pc=QCB	2023826-2019-02421	2020-06-16 04:00:00	Malfunction	STAAR SURGICAL COMPANY	2019-12-18 05:00:00	QCB	IMPLANTABLE COLLAMER LENS (ICL)	Misfocusing	Blurred Vision	N/A	NA	1	Event Description: THE REPORTER INDICATED THAT A 13.2MM, VTICM5_13.2, -9.50/3.0/071 (SPHERE/CYLINDER/AXIS) IMPLANTABLE COLLAMER LENS WAS IMPLANTED INTO THE PATIENTS RIGHT EYE (OD) AND THE PATIENT EXPERIENCED REFRACTIVE SURPRISE. ADDITIONAL INFORMATION HAS BEEN REQUESTED BUT NONE HAS BEEN FORTHCOMING. IF ADDITIONAL INFORMATION IS RECEIVED A SUPPLEMENTAL MEDWATCH REPORT WILL BE SUBMITTED. Manufactu…	Lens Retention	Unknown
https://www.accessdata.fda.gov/scripts/cdrh/cfdocs/cfMAUDE/Detail.CFM?MDRFOI__ID=9516576&pc=QCB	2023826-2019-02450	2019-12-02	Malfunction	STAAR SURGICAL COMPANY	2019-12-24	QCB	IMPLANTABLE COLLAMER LENS (ICL)	Misfocusing	Blurred Vision	N/A	NA	1	Event Description: THE REPORTER INDICATED THAT A 13.2MM, VTICM5_13.2, -4.00/6.0/156 (SPHERE/CYLINDER/AXIS), IMPLANTABLE COLLAMER LENS WAS IMPLANTED INTO THE PATIENT'S RIGHT EYE (OD) ON (B)(6) 2019. REFRACTIVE SURPRISE WAS OBSERVED, THE LENS REMAINS IMPLANTED. CAUSE OF THE EVENT IS REPORTED AS UNKNOWN. ADDITIONAL INFORMATION HAS BEEN REQUESTED BUT NONE HAS BEEN FORTHCOMING. IF ADDITIONAL INFORMATI…	Lens Retention	Unknown
https://www.accessdata.fda.gov/scripts/cdrh/cfdocs/cfMAUDE/Detail.CFM?MDRFOI__ID=9536347&pc=QCB	2023826-2019-02508	NA	Malfunction	STAAR SURGICAL COMPANY	2019-12-31	QCB	IMPLANTABLE COLLAMER LENS (ICL)	Misfocusing; Inadequacy of Device Shape and/or Size	Blurred Vision	NA	NA	1	Event Description: THE REPORTER INDICATED THE SURGEON IMPLANTED A 13.2MM VTICM5_13.2 IMPLANTABLE COLLAMER LENS, -9.50/+6.0/025 (SPHERE/CYLINDER/AXIS), IN THE PATIENTS LEFT EYE (OS) ON (B)(6) 2019. THE LENS WAS REPORTED AS HAVING EXCESSIVE VAULTING AND THE PATIENT EXPERIENCED A REFRACTIVE SURPRISE. THE LENS REMAINS IMPLANTED. THE CAUSE OF THE EVENT WAS UNKNOWN. Manufacturer Narrative: THIS PRODUCT…	Lens Retention	Unknown
https://www.accessdata.fda.gov/scripts/cdrh/cfdocs/cfMAUDE/Detail.CFM?MDRFOI__ID=9588359&pc=QCB	2023826-2020-00120	2019-11-04	Malfunction	STAAR SURGICAL COMPANY	2020-01-14	QCB	IMPLANTABLE COLLAMER LENS (ICL)	Misfocusing	Blurred Vision	NA	NA	1	Event Description: THE REPORTER INDICATED THAT A 13.2MM, VTICMO13.2, -14.50/5.00/95 (SPHERE/CYLINDER/AXIS), IMPLANTABLE COLLAMER LENS WAS IMPLANTED INTO THE PATIENTS RIGHT EYE (OD) ON (B)(6) 2019. ON (B)(6) 2019 REFRACTIVE SURPRISE WAS NOTED. LENS REMAINS IMPLANTED, PATIENTS CURRENT CONDITION IS GOOD, BCVA 20/20. IF ADDITIONAL INFORMATION IS RECEIVED A SUPPLEMENTAL MEDWATCH REPORT WILL BE SUBMITT…	Lens Retention	Unknown
https://www.accessdata.fda.gov/scripts/cdrh/cfdocs/cfMAUDE/Detail.CFM?MDRFOI__ID=9614033&pc=QCB	2023826-2020-00138	2019-07-16	Malfunction	STAAR SURGICAL COMPANY	2020-01-21	QCB	IMPLANTABLE COLLAMER LENS (ICL)	Misfocusing; Patient-Device Incompatibility; Device Dislodged or Dislocated	Blurred Vision	NA	NA	1	Event Description: THE REPORTER INDICATED THE SURGEON IMPLANTED A 13.7MM VTICM5_13.7 IMPLANTABLE COLLAMER LENS, -2.5/+6.0/080 (SPHERE/CYLINDER/AXIS), IN THE PATIENT'S RIGHT EYE (OD) ON (B)(6) 2018. THE LENS WAS REPORTED AS HAVING ROTATION NOT ASSOCIATED TO A LOW VAULT AND THE PATIENT EXPERIENCED A REFRACTIVE SURPRISE. AT POST-OP VISIT ON (B)(6) 2020, THE REFRACTION WAS STABLE. THE PATIENT WAS PRE…	Lens Retention	Unknown
https://www.accessdata.fda.gov/scripts/cdrh/cfdocs/cfMAUDE/Detail.CFM?MDRFOI__ID=9614063&pc=QCB	2023826-2020-00139	2019-07-16	Malfunction	STAAR SURGICAL COMPANY	2020-01-21	QCB	IMPLANTABLE COLLAMER LENS (ICL)	Misfocusing; Patient-Device Incompatibility; Device Dislodged or Dislocated	Blurred Vision	NA	NA	1	Event Description: THE REPORTER INDICATED THE SURGEON IMPLANTED A 13.2MM VTICM5_13.2 IMPLANTABLE COLLAMER LENS, -1.5/+6.0/074 (SPHERE/CYLINDER/AXIS), IN THE PATIENT'S LEFT EYE (OS) ON (B)(6) 2019. THE LENS WAS REPORTED AS HAVING ROTATION NOT ASSOCIATED TO A LOW VAULT AND THE PATIENT EXPERIENCED A REFRACTIVE SURPRISE. AT POST-OP VISIT ON (B)(6) 2020, THE REFRACTION WAS STABLE. THE PATIENT WAS PRES…	Lens Retention	Unknown
https://www.accessdata.fda.gov/scripts/cdrh/cfdocs/cfMAUDE/Detail.CFM?MDRFOI__ID=9689160&pc=QCB	2023826-2020-00282	2018-02-09	Malfunction	STAAR SURGICAL COMPANY	2020-02-10	QCB	IMPLANTABLE COLLAMER LENS (ICL)	Misfocusing	Blurred Vision	N/A	NA	1	Event Description: THE REPORTER INDICATED THAT A 12.6MM, VTICM5_12.6, -5.00/2.0/115 (SPHERE/CYLINDER/AXIS), IMPLANTABLE COLLAMER LENS WAS IMPLANTED INTO THE PATIENT'S RIGHT EYE (OD) ON (B)(6) 2018. REFRACTIVE SURPRISE WAS OBSERVED, THE LENS REMAINS IMPLANTED. REPORTEDLY, PATIENT "ENDED UP WITH SMALL MINUS ON ONE EYE AND SMALL PLUS ON OTHER EYE. WE WILL CHANGE RIGHT LENS AND HOPE THAT THE BALANCE …	Lens Retention	Unknown
https://www.accessdata.fda.gov/scripts/cdrh/cfdocs/cfMAUDE/Detail.CFM?MDRFOI__ID=9706694&pc=QCB	2023826-2020-00306	2020-01-13	Malfunction	STAAR SURGICAL COMPANY	2020-02-13	QCB	IMPLANTABLE COLLAMER LENS (ICL)	Misfocusing; Inadequacy of Device Shape and/or Size	Blurred Vision	N/A	NA	1	Event Description: THE REPORTER INDICATED THAT THE SURGEON IMPLANTED A 12.6MM VTICM5_12.6, -5.00/2.0/084 (SPHERE/CYLINDER/AXIS) , IMPLANTABLE COLLAMER LENS INTO THE PATIENT'S LEFT EYE (OS) ON (B)(6) 2020. "VERY LOW VAULT AND REFRACTIVE SURPRISE" WERE OBSERVED. LENS REMAINS IMPLANTED. ADDITIONAL INFORMATION HAS BEEN REQUESTED BUT NONE HAS BEEN FORTHCOMING. IF ADDITIONAL INFORMATION IS RECEIVED A S…	Lens Retention	Unknown
https://www.accessdata.fda.gov/scripts/cdrh/cfdocs/cfMAUDE/Detail.CFM?MDRFOI__ID=9706704&pc=QCB	2023826-2020-00305	2020-01-13	Malfunction	STAAR SURGICAL COMPANY	2020-02-13	QCB	IMPLANTABLE COLLAMER LENS (ICL)	Misfocusing; Inadequacy of Device Shape and/or Size	Blurred Vision	N/A	NA	1	Event Description: THE REPORTER INDICATED THAT THE SURGEON IMPLANTED A 12.6MM VTICM5_12.6, -5.50/2.5/087 (SPHERE/CYLINDER/AXIS) , IMPLANTABLE COLLAMER LENS INTO THE PATIENT'S RIGHT EYE (OD) ON (B)(6) 2020. "VERY LOW VAULT AND REFRACTIVE SURPRISE" WERE OBSERVED. LENS REMAINS IMPLANTED. ADDITIONAL INFORMATION HAS BEEN REQUESTED BUT NONE HAS BEEN FORTHCOMING. IF ADDITIONAL INFORMATION IS RECEIVED A …	Lens Retention	Unknown
https://www.accessdata.fda.gov/scripts/cdrh/cfdocs/cfMAUDE/Detail.CFM?MDRFOI__ID=9721915&pc=QCB	2023826-2020-00308	2020-01-22	Malfunction	STAAR SURGICAL COMPANY	2020-02-18	QCB	IMPLANTABLE COLLAMER LENS	Misfocusing	Blurred Vision	N/A	NA	1	Event Description: THE REPORTER STATED THAT THE SURGEON IMPLANTED A 12.6MM VTICM5_12.6, -10.5/+4.0/092 (SPHERE/CYLINDER/AXIS) INTO THE PATIENT'S RIGHT EYE (OD) ON (B)(6) 2020. THE SURGEON REPORTS REFRACTIVE SURPRISE. REPORTEDLY, LENS REMAINS IMPLANTED. Manufacturer Narrative: THIS PRODUCT IS MANUFACTURED IN THE U.S. BUT NOT MARKETED IN THE U.S. NO SIMILAR COMPLAINT TYPE EVENTS REPORTED FOR UNITS …	Lens Retention	Unknown
https://www.accessdata.fda.gov/scripts/cdrh/cfdocs/cfMAUDE/Detail.CFM?MDRFOI__ID=9721913&pc=QCB	2023826-2020-00309	2020-01-22 05:00:00	Injury	STAAR SURGICAL COMPANY	2020-02-18 05:00:00	QCB	IMPLANTABLE COLLAMER LENS	Misfocusing; Appropriate Term/Code Not Available	Blurred Vision	N/A	NA	1	Event Description: THE REPORTER STATED THAT THE SURGEON IMPLANTED A 12.6MM VTICM5_12.6, -11.5/+4.0/090 (SPHERE/CYLINDER/AXIS) INTO THE PATIENT'S LEFT EYE (OS) ON (B)(6) 2020. THE SURGEON REPORTS REFRACTIVE SURPRISE. REPORTEDLY, LENS REMAINS IMPLANTED. Manufacturer Narrative: ADDITIONAL INFORMATION:: B1- ADVERSE EVENT. B2- REQUIRES INTERVENTION TO PREVENT PERMANENT IMPAIRMENT/DAMAGE . B5-THE REPOR…	Lens Exchange	Resolved
https://www.accessdata.fda.gov/scripts/cdrh/cfdocs/cfMAUDE/Detail.CFM?MDRFOI__ID=9759568&pc=QCB	2023826-2020-00325	2019-07-05 04:00:00	Malfunction	STAAR SURGICAL COMPANY	2020-02-26 05:00:00	QCB	IMPLANTABLE COLLAMER LENS (ICL)	Misfocusing	Blurred Vision	NA	NA	1	Event Description: THE REPORTER INDICATED THE SURGEON IMPLANTED A 13.7MM VTICMO13.7 IMPLANTABLE COLLAMER LENS, -17.00/+6.0/180 (SPHERE/CYLINDER/AXIS), IN THE PATIENTS RIGHT EYE (OD). THE PATIENT EXPERIENCED A REFRACTIVE SURPRISE AND THE LENS REMAINS IMPLANTED. ADDITIONAL INFORMATION HAS BEEN REQUESTED BUT NONE HAS BEEN FORTHCOMING. IF ADDITIONAL INFORMATION IS RECEIVED, A SUPPLEMENTAL MEDWATCH WI…	Lens Retention	Unknown
https://www.accessdata.fda.gov/scripts/cdrh/cfdocs/cfMAUDE/Detail.CFM?MDRFOI__ID=9850132&pc=QCB	2023826-2020-00571	2020-02-19 05:00:00	Injury	STAAR SURGICAL COMPANY	2020-03-18 04:00:00	QCB	IMPLANTABLE COLLAMER LENS (ICL)	Misfocusing; Adverse Event Without Identified Device or Use Problem	Blurred Vision	NA	NA	1	Event Description: THE REPORTER INDICATED THE SURGEON IMPLANTED A 13.2MM VTICM5_13.2 IMPLANTABLE COLLAMER LENS, -11.0/+4.0/073 (SPHERE/CYLINDER/AXIS), IN THE PATIENTS RIGHT EYE (OD). THE PATIENT EXPERIENCED A REFRACTIVE SURPRISE AND REMAINS IMPLANTED. THE CAUSE OF THE EVENT WAS UNKNOWN. ADDITIONAL INFORMATION HAS BEEN REQUESTED BUT NONE HAS BEEN FORTHCOMING. IF ADDITIONAL INFORMATION IS RECEIVED,…	Lens Exchange	Resolved
https://www.accessdata.fda.gov/scripts/cdrh/cfdocs/cfMAUDE/Detail.CFM?MDRFOI__ID=9960153&pc=QCB	2023826-2020-00853	NA	Malfunction	STAAR SURGICAL COMPANY	2020-04-14	QCB	IMPLANTABLE COLLAMER LENS	Misfocusing; Device Dislodged or Dislocated	Blurred Vision	N/A	NA	1	Event Description: THE REPORTER STATED THAT THE SURGEON IMPLANTED A 13.2MM VTICM5_13.2, -12.5/+3.5/104 (SPHERE/CYLINDER/AXIS) INTO THE PATIENT'S RIGHT EYE (OD) ON (B)(6) 2019. THE SURGEON REPORTS REFRACTIVE SURPRISE AND POSSIBLE LENS ROTATION. REPORTEDLY, LENS REMAINS IMPLANTED. ATTEMPTS TO OBTAIN ADDITIONAL INFORMATION HAVE NOT BEEN SUCCESSFUL. Manufacturer Narrative: THIS PRODUCT IS MANUFACTURE…	Lens Retention	Unknown
https://www.accessdata.fda.gov/scripts/cdrh/cfdocs/cfMAUDE/Detail.CFM?MDRFOI__ID=9960163&pc=QCB	2023826-2020-00854	NA	Malfunction	STAAR SURGICAL COMPANY	2020-04-14	QCB	IMPLANTABLE COLLAMER LENS	Misfocusing; Device Dislodged or Dislocated	Blurred Vision	N/A	NA	1	Event Description: THE REPORTER STATED THAT THE SURGEON IMPLANTED A 13.2MM VTICM5_13.2, -12.0/+3.0/094 (SPHERE/CYLINDER/AXIS) INTO THE PATIENT'S LEFT EYE (OS) ON (B)(6) 2019. THE SURGEON REPORTS REFRACTIVE SURPRISE AND POSSIBLE LENS ROTATION. REPORTEDLY, LENS REMAINS IMPLANTED. ATTEMPTS TO OBTAIN ADDITIONAL INFORMATION HAVE NOT BEEN SUCCESSFUL. Manufacturer Narrative: THIS PRODUCT IS MANUFACTURED…	Lens Retention	Unknown
https://www.accessdata.fda.gov/scripts/cdrh/cfdocs/cfMAUDE/Detail.CFM?MDRFOI__ID=10025646&pc=QCB	2023826-2020-01007	2020-04-06	Malfunction	STAAR SURGICAL COMPANY	2020-05-05	QCB	IMPLANTABLE COLLAMER LENS	Misfocusing	Blurred Vision	N/A	NA	1	Event Description: THE REPORTER STATED THAT THE SURGEON IMPLANTED A 12.6MM VTICM5_12.6, -10.0/+2.5/088 (SPHERE/CYLINDER/AXIS) INTO THE PATIENT'S LEFT EYE (OS) ON (B)(6) 2020. THE SURGEON REPORTS REFRACTIVE SURPRISE. REPORTEDLY, LENS REMAINS IMPLANTED. Manufacturer Narrative: THIS PRODUCT IS MANUFACTURED IN THE U.S. BUT NOT MARKETED IN THE U.S. NO SIMILAR COMPLAINT TYPE EVENTS REPORTED FOR UNITS W…	Lens Retention	Unknown
https://www.accessdata.fda.gov/scripts/cdrh/cfdocs/cfMAUDE/Detail.CFM?MDRFOI__ID=10025656&pc=QCB	2023826-2020-01006	2020-04-06	Malfunction	STAAR SURGICAL COMPANY	2020-05-05	QCB	IMPLANTABLE COLLAMER LENS	Misfocusing	Blurred Vision	N/A	NA	1	Event Description: THE REPORTER STATED THAT THE SURGEON IMPLANTED A 12.6MM VTICM5_12.6, -10.0/+2.5/093 (SPHERE/CYLINDER/AXIS) INTO THE PATIENT'S RIGHT EYE (OD) ON (B)(6) 2020. THE SURGEON REPORTS REFRACTIVE SURPRISE. REPORTEDLY, LENS REMAINS IMPLANTED. Manufacturer Narrative: THIS PRODUCT IS MANUFACTURED IN THE U.S. BUT NOT MARKETED IN THE U.S. NO SIMILAR COMPLAINT TYPE EVENTS REPORTED FOR UNITS …	Lens Retention	Unknown
https://www.accessdata.fda.gov/scripts/cdrh/cfdocs/cfMAUDE/Detail.CFM?MDRFOI__ID=10130964&pc=QCB	2023826-2020-01217	2020-03-27 04:00:00	Malfunction	STAAR SURGICAL COMPANY	2020-06-08 04:00:00	QCB	IMPLANTABLE COLLAMER LENS (ICL)	Misfocusing	Blurred Vision	NA	NA	1	Event Description: THE REPORTER INDICATED THAT A 12.1MM, VTICMO12.1, -1700/3.50/89 (SPHERE/CYLINDER/AXIS), IMPLANTABLE COLLAMER LENS, WAS IMPLANTED INTO THE PATIENTS LEFT EYE (OS) ON (B)(6) 2020. THE PATIENT EXPERIENCED REFRACTIVE SURPRISE, LENS REMAINS IMPLANTED. IF ADDITIONAL INFORMATION IS RECEIVED A SUPPLEMENTAL MEDWATCH REPORT WILL BE SUBMITTED. Manufacturer Narrative: THE REPORTER STATED HI…	Lens Retention	Unknown
https://www.accessdata.fda.gov/scripts/cdrh/cfdocs/cfMAUDE/Detail.CFM?MDRFOI__ID=10131012&pc=QCB	2023826-2020-01218	2020-03-27 04:00:00	Injury	STAAR SURGICAL COMPANY	2020-06-08 04:00:00	QCB	IMPLANTABLE COLLAMER LENS (ICL)	Misfocusing	Blurred Vision	NA	NA	1	Event Description: THE REPORTER INDICATED THAT A 12.1MM, VTICMO12.1, -18.00/3.00/77 (SPHERE/CYLINDER/AXIS), IMPLANTABLE COLLAMER LENS, WAS IMPLANTED INTO THE PATIENTS RIGHT EYE (OD) ON (B)(6) 2020. THE PATIENT EXPERIENCED REFRACTIVE SURPRISE, LENS REMAINS IMPLANTED. IF ADDITIONAL INFORMATION IS RECEIVED A SUPPLEMENTAL MEDWATCH REPORT WILL BE SUBMITTED. Manufacturer Narrative: THE REPORTER STATED …	Lens Retention	Unknown
https://www.accessdata.fda.gov/scripts/cdrh/cfdocs/cfMAUDE/Detail.CFM?MDRFOI__ID=10162715&pc=QCB	2023826-2020-01294	2020-01-21 05:00:00	Injury	STAAR SURGICAL COMPANY	2020-06-17 04:00:00	QCB	IMPLANTABLE COLLAMER LENS (ICL)	Misfocusing; No Apparent Adverse Event	Blurred Vision	NA	NA	1	Event Description: THE REPORTER REPORTED REFRACTIVE CHANGE OVERTIME IN THE LEFT EYE (OS). ADDITIONAL INFORMATION HAS BEEN REQUESTED BUT NONE HAS BEEN FORTHCOMING. IF ADDITIONAL INFORMATION IS RECEIVED A SUPPLEMENTAL MEDWATCH REPORT WILL BE SUBMITTED. Manufacturer Narrative: ADDITIONAL INFORMATION: H3- DEVICE EVALUATION: LENS WAS RETURNED IN A MICRO CENTRIFUGE VIAL WITH MOISTURE AND RESIDUE ON THE…	Lens Exchange	Resolved
https://www.accessdata.fda.gov/scripts/cdrh/cfdocs/cfMAUDE/Detail.CFM?MDRFOI__ID=10222177&pc=QCB	2023826-2020-01420	2020-06-08	Malfunction	STAAR SURGICAL COMPANY	2020-07-01	QCB	IMPLANTABLE COLLAMER LENS	Misfocusing; Improper or Incorrect Procedure or Method	Blurred Vision	N/A	NA	1	Event Description: THE REPORTER STATED THAT THE SURGEON IMPLANTED A 13.2MM VTICM5_13.2, -14.0/+5.0/109 (SPHERE/CYLINDER/AXIS) INTO THE PATIENT'S RIGHT EYE (OD) ON (B)(6) 2019. THE SURGEON REPORTS REFRACTIVE SURPRISE. REPORTEDLY, LENS REMAINS IMPLANTED. THE CAUSE OF THE EVENT IS REPORTED AS USER ERROR. Manufacturer Narrative: THIS PRODUCT IS MANUFACTURED IN THE U.S. BUT NOT MARKETED IN THE U.S. (B…	Lens Retention	Unknown
https://www.accessdata.fda.gov/scripts/cdrh/cfdocs/cfMAUDE/Detail.CFM?MDRFOI__ID=10222170&pc=QCB	2023826-2020-01418	2020-06-05 04:00:00	Malfunction	STAAR SURGICAL COMPANY	2020-07-01 04:00:00	QCB	IMPLANTABLE COLLAMER LENS	Misfocusing	Blurred Vision	N/A	NA	1	Event Description: THE REPORTER STATED THAT THE SURGEON IMPLANTED A 13.2MM VTICM5_13.2, -10.5/+1.5/091 (SPHERE/CYLINDER/AXIS) INTO THE PATIENT'S RIGHT EYE (OD) ON (B)(6) 2020. THE SURGEON REPORTS REFRACTIVE SURPRISE. REPORTEDLY, LENS REMAINS IMPLANTED. Manufacturer Narrative: ADDITIONAL INFORMATION: B5- "THE PROBLEM WAS RESOLVED." SHOULD BE ADDED TO PREVIOUS MDR CLAIM# (B)(4). Manufacturer Narrat…	Lens Retention	Resolved
https://www.accessdata.fda.gov/scripts/cdrh/cfdocs/cfMAUDE/Detail.CFM?MDRFOI__ID=10254180&pc=QCB	2023826-2020-01444	2020-03-05 05:00:00	Malfunction	STAAR SURGICAL COMPANY	2020-07-09 04:00:00	QCB	IMPLANTABLE COLLAMER LENS (ICL)	Misfocusing	Blurred Vision	P030016	NA	1	Event Description: THE REPORTER INDICATED THAT THE SURGEON IMPLANTED A 12.6MM TMICL12.6 LENS, -12.5/+4.0/090 (SPHERE/CYLINDER/AXIS) INTO THE PATIENT'S RIGHT (OD) EYE ON (B)(6) 2020. THE SURGEON REPORTS REFRACTIVE SURPRISE. REPORTEDLY, THE LENS REMAINS IMPLANTED. THE CAUSE OF THE EVENT IS REPORTED AS UNKNOWN. Manufacturer Narrative: CORRECTED DATA: B1- CORRECTED TO PRODUCT PROBLEM-MALFUNCTION. H1-…	Lens Retention	Unknown
https://www.accessdata.fda.gov/scripts/cdrh/cfdocs/cfMAUDE/Detail.CFM?MDRFOI__ID=10332955&pc=QCB	2023826-2020-01568	NA	Injury	STAAR SURGICAL COMPANY	2020-07-28 04:00:00	QCB	IMPLANTABLE COLLAMER LENS (ICL)	Misfocusing	Blurred Vision	N/A	NA	1	Event Description: THE REPORTER INDICATED THAT A 12.1MM, VTICM5_12.1, -12.50/2.5/089 (SPHERE/CYLINDER/AXIS), IMPLANTABLE COLLAMER LENS WAS IMPLANTED INTO THE PATIENT'S RIGHT EYE (OD) ON (B)(6) 2020. REFRACTIVE SURPRISE WAS OBSERVED, THE LENS REMAINS IMPLANTED. ADDITIONAL INFORMATION HAS BEEN REQUESTED BUT NONE HAS BEEN FORTHCOMING. IF ADDITIONAL INFORMATION IS RECEIVED A SUPPLEMENTAL MEDWATCH REP…	Lens Repositioning	Not_Resolved
https://www.accessdata.fda.gov/scripts/cdrh/cfdocs/cfMAUDE/Detail.CFM?MDRFOI__ID=10356745&pc=QCB	2023826-2020-01608	2020-01-19 05:00:00	Injury	STAAR SURGICAL COMPANY	2020-08-03 04:00:00	QCB	IMPLANTABLE COLLAMER LENS (ICL)	Misfocusing; Device Dislodged or Dislocated	Blurred Vision	NA	NA	1	Event Description: THE REPORTER INDICATED THE SURGEON IMPLANTED A 13.2MM VTICM5_13.2 IMPLANTABLE COLLAMER LENS, -04.00/+4.0/065 (SPHERE/CYLINDER/AXIS), IN THE PATIENTS LEFT EYE (OS), ON (B)(6) 2020. THE PATIENT EXPERIENCED A REFRACTIVE SURPRISE AND BLURRED VISION. THE LENS REMAINED IMPLANTED. THE CAUSE OF THE EVENT WAS UNKNOWN. Manufacturer Narrative: B5: THE REPORTER INDICATED A 20 DEGREE MISALI…	Lens Retention	Unknown
https://www.accessdata.fda.gov/scripts/cdrh/cfdocs/cfMAUDE/Detail.CFM?MDRFOI__ID=10403862&pc=QCB	2023826-2020-01730	2020-07-15	Malfunction	STAAR SURGICAL COMPANY	2020-08-13	QCB	IMPLANTABLE COLLAMER LENS	Misfocusing	Blurred Vision	N/A	NA	1	Event Description: THE REPORTER STATED THAT THE SURGEON IMPLANTED A 12.6MM VTICM5_12.6, -13.0/+4.5/099 (SPHERE/CYLINDER/AXIS) INTO THE PATIENT'S RIGHT EYE (OD) ON (B)(6) 2020. THE SURGEON REPORTS REFRACTIVE SURPRISE. REPORTEDLY, LENS REMAINS IMPLANTED. Manufacturer Narrative: WEIGHT, ETHNICITY, RACE: UNK. PMA/510K: THIS PRODUCT IS MANUFACTURED IN THE U.S. BUT NOT MARKETED IN THE U.S. LENS WORK OR…	Lens Retention	Unknown
https://www.accessdata.fda.gov/scripts/cdrh/cfdocs/cfMAUDE/Detail.CFM?MDRFOI__ID=10508720&pc=QCB	2023826-2020-02061	2020-07-23	Malfunction	STAAR SURGICAL COMPANY	2020-09-09	QCB	IMPLANTABLE COLLAMER LENS (ICL)	Misfocusing	Blurred Vision	NA#S-P#NA	NA	1	Event Description: THE REPORTER INDICATED THAT A 13.2MM, VTICM5_13.2, -12.50/2.00/94 (SPHERE/CYLINDER/AXIS), IMPLANTABLE COLLAMER LENS WAS IMPLANTED INTO THE PATIENTS RIGHT EYE (OD) ON (B)(6) 2020. THE PATIENT EXPERIENCED REFRACTIVE SURPRISE, LENS REMAINS IMPLANTED. IF ADDITIONAL INFORMATION IS RECEIVED A SUPPLEMENTAL MEDWATCH REPORT WILL BE SUBMITTED. Manufacturer Narrative: WEIGHT: UNK. ETHNICI…	Lens Retention	Unknown
https://www.accessdata.fda.gov/scripts/cdrh/cfdocs/cfMAUDE/Detail.CFM?MDRFOI__ID=10508814&pc=QCB	2023826-2020-02063	2020-07-23	Malfunction	STAAR SURGICAL COMPANY	2020-09-09	QCB	IMPLANTABLE COLLAMER LENS (ICL)	Misfocusing	Blurred Vision	NA#S-P#NA	NA	1	Event Description: THE REPORTER INDICATED THAT A 13.2MM, VTICM5_13.2, -11.50/2.00/61 (SPHERE/CYLINDER/AXIS), IMPLANTABLE COLLAMER LENS WAS IMPLANTED INTO THE PATIENTS LEFT EYE (OS) ON (B)(6) 2020. THE PATIENT EXPERIENCED REFRACTIVE SURPRISE, LENS REMAINS IMPLANTED. IF ADDITIONAL INFORMATION IS RECEIVED A SUPPLEMENTAL MEDWATCH REPORT WILL BE SUBMITTED. Manufacturer Narrative: THIS PRODUCT IS NOT M…	Lens Retention	Unknown
https://www.accessdata.fda.gov/scripts/cdrh/cfdocs/cfMAUDE/Detail.CFM?MDRFOI__ID=10508931&pc=QCB	2023826-2020-02065	2018-03-06	Injury	STAAR SURGICAL COMPANY	2020-09-09	QCB	IMPLANTABLE COLLAMER LENS (ICL)	Misfocusing	Blurred Vision	NA#S-P#NA	NA	1	Event Description: THE REPORTER INDICATED THAT A 13.7MM, VTICM5_13.7, -12.50/4.5/135 (SPHERE/CYLINDER/AXIS), IMPLANTABLE COLLAMER LENS WAS IMPLANTED INTO THE PATIENTS RIGHT EYE (OD) ON (B)(6) 2018. ON (B)(6) 2018 THE LENS WAS REPOSITIONED DUE TO REFRACTIVE SURPRISE. IT WAS REPORTED THAT THE PROBLEM RESOLVED, PATIENT IS HAPPY. USER ERROR WAS REPORTED TO BE THE CAUSE OF THIS EVENT. Manufacturer Nar…	Lens Repositioning	Resolved
https://www.accessdata.fda.gov/scripts/cdrh/cfdocs/cfMAUDE/Detail.CFM?MDRFOI__ID=10524412&pc=QCB	2023826-2020-02039	2020-08-03 04:00:00	Injury	STAAR SURGICAL COMPANY	2020-09-11 04:00:00	QCB	IMPLANTABLE COLLAMER LENS (ICL)	Misfocusing; No Apparent Adverse Event	Blurred Vision	N/A#S-P#N/A	NA	1	Event Description: THE REPORTER INDICATED THAT A 12.6MM, VTICMO12.6, -15.5/2.5/098 (SPHERE/CYLINDER/AXIS), IMPLANTABLE COLLAMER LENS WAS IMPLANTED INTO THE PATIENT'S RIGHT EYE (OD) ON (B)(6) 2017. REFRACTIVE CHANGE OVER TIME WAS REPORTED. THE LENS REMAINS IMPLANTED. Manufacturer Narrative: H3 - DEVICE EVALUATION: LENS WAS RETURNED IN A MICRO-CENTRIFUGE VIAL WITH MOISTURE ON THE LENS. VISUAL INSPE…	Lens Exchange	Resolved
https://www.accessdata.fda.gov/scripts/cdrh/cfdocs/cfMAUDE/Detail.CFM?MDRFOI__ID=10551357&pc=QCB	2023826-2020-02122	2020-08-10 04:00:00	Injury	STAAR SURGICAL COMPANY	2020-09-17 04:00:00	QCB	IMPLANTABLE COLLAMER LENS	Misfocusing; Device Dislodged or Dislocated	Blurred Vision	N/A	NA	1	Event Description: THE REPORTER STATED THAT THE SURGEON IMPLANTED A 12.6MM VTICM5_12.6, -12.5/+3.0/086 (SPHERE/CYLINDER/AXIS) INTO THE PATIENT'S RIGHT EYE (OD) ON (B)(6) 2020. THE SURGEON REPORTS LENS ROTATION AND REFRACTIVE SURPRISE. ON (B)(6) 2020 THE LENS WAS REPOSITIONED WHICH DID NOT RESOLVE THE PROBLEM. THE SURGEON STATES THE LENS WAS REPOSITIONED 3 TIMES AND THE LENS ROTATED AT THE SAME AN…	Lens Exchange	Resolved
https://www.accessdata.fda.gov/scripts/cdrh/cfdocs/cfMAUDE/Detail.CFM?MDRFOI__ID=10556954&pc=QCB	2023826-2020-02154	2020-07-17 04:00:00	Malfunction	STAAR SURGICAL COMPANY	2020-09-18 04:00:00	QCB	IMPLANTABLE COLLAMER LENS (ICL)	Misfocusing	Blurred Vision	NA	NA	1	Event Description: THE REPORTER INDICATED THAT A 13.2MM, VTICM5_13.2, -11.50/1.50/73 (SPHERE/CYLINDER/AXIS), IMPLANTABLE COLLAMER LENS WAS IMPLANTED INTO THE PATIENTS LEFT EYE (OS) ON (B)(6) 2020. REFRACTIVE SURPRISE WAS OBSERVED. LENS REMAINS IMPLANTED, NO FURTHER INTERVENTION HAS BEEN PERFORMED, VISION REMAINS THE SAME. IF ADDITIONAL INFORMATION IS RECEIVED A SUPPLEMENTAL MEDWATCH REPORT WILL B…	Lens Retention	Unknown
https://www.accessdata.fda.gov/scripts/cdrh/cfdocs/cfMAUDE/Detail.CFM?MDRFOI__ID=10560526&pc=QCB	2023826-2020-02112	2020-08-26	Injury	STAAR SURGICAL COMPANY	2020-09-21	QCB	IMPLANTABLE COLLAMER LENS (ICL)	Unintended Movement	Blurred Vision	P030016	NA	1	Event Description: THE REPORTER INDICATED THAT THE SURGEON IMPLANTED UPSIDE DOWN A 12.6MM TMICL12.6, -10.50/1.5/078 (SPHERE/CYLINDER/AXIS), IMPLANTABLE COLLAMER LENS, INTO THE PATIENT'S LEFT EYE (OS) ON (B)(6) 2020. THERE WAS PATIENT CONTACT (LENS TOUCHED THE EYE) WITH NO PATIENT INJURY. BLURRED VISION WAS OBSERVED AND LENS WAS REPOSITIONED ON (B)(6) 2020, THIS DID NOT RESOLVE THE PROBLEM. THE LE…	Lens Exchange	Resolved
https://www.accessdata.fda.gov/scripts/cdrh/cfdocs/cfMAUDE/Detail.CFM?MDRFOI__ID=10600979&pc=QCB	2023826-2020-02232	2020-06-22 04:00:00	Malfunction	STAAR SURGICAL COMPANY	2020-09-29 04:00:00	QCB	IMPLANTABLE COLLAMER LENS (ICL)	Misfocusing; Device Dislodged or Dislocated	Blurred Vision	N/A	NA	1	Event Description: THE REPORTER INDICATED THAT A 12.6MM, VTICM5_12.6, -13.50/1.5/021 (SPHERE/CYLINDER/AXIS), IMPLANTABLE COLLAMER LENS WAS IMPLANTED INTO THE PATIENT'S RIGHT EYE (OD) ON (B)(6) 2020. REFRACTIVE SURPRISE WAS OBSERVED, THE LENS REMAINS IMPLANTED. REPORTEDLY, SURGEON "NOT YET DECIDED WHETHER TO TRY ROTATION, REPLACEMENT, OR LASER CORRECTION." ADDITIONAL INFORMATION HAS BEEN REQUESTED…	Lens Retention	Unknown
https://www.accessdata.fda.gov/scripts/cdrh/cfdocs/cfMAUDE/Detail.CFM?MDRFOI__ID=10635460&pc=QCB	2023826-2020-02247	2020-09-15 04:00:00	Malfunction	STAAR SURGICAL COMPANY	2020-10-06 04:00:00	QCB	IMPLANTABLE COLLAMER LENS (ICL)	Misfocusing	Blurred Vision	N/A	NA	1	Event Description: THE REPORTER INDICATED THAT A 13.2MM, VTICMO_13.2, -17.50/2.5/090 (SPHERE/CYLINDER/AXIS), IMPLANTABLE COLLAMER LENS WAS IMPLANTED INTO THE PATIENT'S LEFT EYE (OS) ON (B)(6) 2020. REFRACTIVE SURPRISE WAS OBSERVED, THE LENS REMAINS IMPLANTED. PER REPORTER ON (B)(6) 2020, SURGEON "HAS GIVEN PATIENT CONTACT LENSES TO CORRECT THE TINY RESIDUAL. PATIENT CONTINUES TO BE UNDER OBSERVAT…	Lens Retention	Unknown
https://www.accessdata.fda.gov/scripts/cdrh/cfdocs/cfMAUDE/Detail.CFM?MDRFOI__ID=10635463&pc=QCB	2023826-2020-02246	2020-09-15 04:00:00	Malfunction	STAAR SURGICAL COMPANY	2020-10-06 04:00:00	QCB	IMPLANTABLE COLLAMER LENS (ICL)	Misfocusing	Blurred Vision	N/A	NA	1	Event Description: THE REPORTER INDICATED THAT A 13.2MM, VTICMO_13.2, -17.50/2.5/094 (SPHERE/CYLINDER/AXIS), IMPLANTABLE COLLAMER LENS WAS IMPLANTED INTO THE PATIENT'S RIGHT EYE (OD) ON (B)(6) 2020. REFRACTIVE SURPRISE WAS OBSERVED, THE LENS REMAINS IMPLANTED. PER REPORTER ON (B)(6) 2020, SURGEON "HAS GIVEN PATIENT CONTACT LENSES TO CORRECT THE TINY RESIDUAL. "PATIENT CONTINUES TO BE UNDER OBSERV…	Lens Retention	Unknown
https://www.accessdata.fda.gov/scripts/cdrh/cfdocs/cfMAUDE/Detail.CFM?MDRFOI__ID=10659329&pc=QCB	2023826-2020-02317	2020-06-11 04:00:00	Injury	STAAR SURGICAL COMPANY	2020-10-09 04:00:00	QCB	IMPLANTABLE COLLAMER LENS (ICL)	Misfocusing	Blurred Vision	N/A	NA	1	Event Description: THE REPORTER INDICATED THE SURGEON IMPLANTED A 12.6MM VTICMO12.6 IMPLANTABLE COLLAMER LENS, -15.0/+3.0/095 (SPHERE/CYLINDER/AXIS) INTO THE PATIENT'S LEFT EYE (OS) ON (B)(6) 2020. ON (B)(6) 2020 THE LENS WAS EXCHANGED WITH A SAME SIZE, DIFFERENT MODEL LENS DUE TO REFRACTIVE SURPRISE. THE PROBLEM IS RESOLVED. Manufacturer Narrative: H3-DEVICE EVALUATION: THE LENS WAS RETURNED WIT…	Lens Exchange	Resolved
https://www.accessdata.fda.gov/scripts/cdrh/cfdocs/cfMAUDE/Detail.CFM?MDRFOI__ID=10659337&pc=QCB	2023826-2020-02313	2020-07-28 04:00:00	Injury	STAAR SURGICAL COMPANY	2020-10-09 04:00:00	QCB	IMPLANTABLE COLLAMER LENS	Misfocusing; Patient-Device Incompatibility	Blurred Vision	N/A	NA	1	Event Description: THE REPORTER STATED THAT THE SURGEON IMPLANTED A 13.7MM VTICM5_13.7, -11.5/+3.5/097 (SPHERE/CYLINDER/AXIS) INTO THE PATIENT'S RIGHT EYE (OD) ON (B)(6) 2020. ON (B)(6) 2020 THE LENS WAS EXCHANGED WITH A SAME SIZE, DIFFERENT SPHERE/CYLINDER/AXIS LENS DUE TO REFRACTIVE SURPRISE. THE PROBLEM IS RESOLVED. THE CAUSE OF THE EVENT IS REPORTED AS A PATIENT-RELATED FACTOR. Manufacturer N…	Lens Exchange	Resolved
https://www.accessdata.fda.gov/scripts/cdrh/cfdocs/cfMAUDE/Detail.CFM?MDRFOI__ID=10659339&pc=QCB	2023826-2020-02310	2020-08-17 04:00:00	Injury	STAAR SURGICAL COMPANY	2020-10-09 04:00:00	QCB	IMPLANTABLE COLLAMER LENS	Misfocusing	Blurred Vision	N/A	NA	1	Event Description: THE REPORTER STATED THAT THE SURGEON IMPLANTED A 12.6MM VTICM5_12.6, -12.5/+2.0/074 (SPHERE/CYLINDER/AXIS) INTO THE PATIENT'S LEFT EYE (OS) ON (B)(6) 2020. THE SURGEON REPORTS RESIDUAL ASTIGMATISM, AND BLURRY VISION. THE LENS WAS REPOSITIONED, AND THE PROBLEM WAS RESOLVED. Manufacturer Narrative: CLAIM#: (B)(4). Manufacturer Narrative: ADDITIONAL INFORMATION: B5: THE REPORTER I…	Lens Repositioning	Resolved
https://www.accessdata.fda.gov/scripts/cdrh/cfdocs/cfMAUDE/Detail.CFM?MDRFOI__ID=10678723&pc=QCB	2023826-2020-02357	2020-09-16 04:00:00	Injury	STAAR SURGICAL COMPANY	2020-10-14 04:00:00	QCB	IMPLANTABLE COLLAMER LENS (ICL)	Misfocusing; Adverse Event Without Identified Device or Use Problem	Blurred Vision	P030016	NA	1	Event Description: THE REPORTER INDICATED THAT A 13.2MM, TMICL13.2, -7.00/2.0/111 (SPHERE/CYLINDER/AXIS), IMPLANTABLE COLLAMER LENS WAS IMPLANTED INTO THE PATIENT'S LEFT EYE (OS) ON (B)(6) 2020. BLURRED VISION AND POSSIBLE REFRACTIVE SURPRISE WAS OBSERVED. REPORTEDLY, "A WHITE FIBROUS MEMBRANE ADHERENT TO POSTERIOR ICL." LENS REMAINS IMPLANTED. ADDITIONAL INFORMATION HAS BEEN REQUESTED BUT NONE H…	Lens Extraction	Unknown
https://www.accessdata.fda.gov/scripts/cdrh/cfdocs/cfMAUDE/Detail.CFM?MDRFOI__ID=10687742&pc=QCB	2023826-2020-02382	2020-09-01 04:00:00	Injury	STAAR SURGICAL COMPANY	2020-10-15 04:00:00	QCB	IMPLANTABLE COLLAMER LENS	Misfocusing	Blurred Vision	N/A	NA	1	Event Description: THE REPORTER STATED THAT THE SURGEON IMPLANTED A 13.2MM VTICM5_13.2, -11.5/+6.0/175 (SPHERE/CYLINDER/AXIS) INTO THE PATIENT'S RIGHT EYE (OD) ON (B)(6) 2020. THE SURGEON REPORTS REFRACTIVE SURPRISE. REPORTEDLY, LENS REMAINS IMPLANTED. THE CAUSE OF THE EVENT IS REPORTED AS UNKNOWN. Manufacturer Narrative: ADDITIONAL INFORMATION: B5 - IT WAS LATER REPORTED THAT ON (B)(6) 2021 THE …	Lens Extraction	Unknown
https://www.accessdata.fda.gov/scripts/cdrh/cfdocs/cfMAUDE/Detail.CFM?MDRFOI__ID=10749959&pc=QCB	2023826-2020-02527	NA	Malfunction	STAAR SURGICAL COMPANY	2020-10-28	QCB	IMPLANTABLE COLLAMER LENS (ICL)	Misfocusing; Device Dislodged or Dislocated	Blurred Vision	N/A	NA	1	Event Description: THE REPORTER INDICATED THAT A 12.6MM, VTICMO12.6, -15.0/+5.0/090 (SPHERE/CYLINDER/AXIS), IMPLANTABLE COLLAMER LENS WAS IMPLANTED INTO THE PATIENT'S LEFT EYE (OS) ON (B)(6) 2020. THE SURGEON REPORTS REFRACTIVE SURPRISE AND LENS ROTATION. REPORTEDLY, THE LENS REMAINS IMPLANTED. Manufacturer Narrative: WEIGHT , ETHNICITY, RACE-UNK. DATE OF EVENT-UNK. PMA/510(K): THIS PRODUCT IS MA…	Lens Retention	Unknown
https://www.accessdata.fda.gov/scripts/cdrh/cfdocs/cfMAUDE/Detail.CFM?MDRFOI__ID=10749979&pc=QCB	2023826-2020-02528	2020-09-14 04:00:00	Malfunction	STAAR SURGICAL COMPANY	2020-10-28 04:00:00	QCB	IMPLANTABLE COLLAMER LENS	Misfocusing; Device Dislodged or Dislocated	Blurred Vision	N/A	NA	1	Event Description: THE REPORTER STATED THAT THE SURGEON IMPLANTED A 12.6MM VTICM5_12.6, -8.5/+4.0/088 (SPHERE/CYLINDER/AXIS) INTO THE PATIENT'S LEFT EYE (OS) ON (B)(6) 2020. THE SURGEON REPORTS REFRACTIVE SURPRISE AND LENS ROTATION. REPORTEDLY, LENS REMAINS IMPLANTED. THE CAUSE OF THE EVENT IS REPORTED AS UNKNOWN. Manufacturer Narrative: B5 - THE REPORTER STATED THAT THE SURGEON IMPLANTED A 12.6M…	Lens Repositioning	Resolved
https://www.accessdata.fda.gov/scripts/cdrh/cfdocs/cfMAUDE/Detail.CFM?MDRFOI__ID=11098630&pc=QCB	2023826-2020-03245	2020-08-05 04:00:00	Injury	STAAR SURGICAL COMPANY	2020-12-30 05:00:00	QCB	IMPLANTABLE COLLAMER LENS (ICL)	Misfocusing; Off-Label Use	Blurred Vision	N/A	NA	1	Event Description: THE REPORTER INDICATED THE SURGEON IMPLANTED A 12.6MM VTICM5_12.6 IMPLANTABLE COLLAMER LENS, -10.5/+3.5/093 (SPHERE/CYLINDER/AXIS) INTO THE PATIENT'S RIGHT EYE (OD) ON (B)(6) 2020. ON (B)(6) 2020, THE LENS WAS EXCHANGED WITH A SAME SIZE, DIFFERENT SPHERE/CYLINDER/AXIS LENS DUE TO REFRACTIVE SURPRISE. THE PROBLEM IS RESOLVED. Manufacturer Narrative: ADDITIONAL INFORMATION: H3- D…	Lens Exchange	Resolved
https://www.accessdata.fda.gov/scripts/cdrh/cfdocs/cfMAUDE/Detail.CFM?MDRFOI__ID=11065615&pc=QCB	2023826-2020-03110	2020-11-26	Malfunction	STAAR SURGICAL COMPANY	2020-12-23	QCB	IMPLANTABLE COLLAMER LENS (ICL)	Misfocusing	Blurred Vision	N/A	NA	1	Event Description: THE REPORTER INDICATED THAT A 13.2MM, VTICMO13.2, -5.50/6.0/003 (SPHERE/CYLINDER/AXIS), IMPLANTABLE COLLAMER LENS WAS IMPLANTED INTO THE PATIENT'S LEFT EYE (OS) ON (B)(6) 2020. REFRACTIVE SURPRISE WAS OBSERVED, THE LENS REMAINS IMPLANTED. ADDITIONAL INFORMATION HAS BEEN REQUESTED BUT NONE HAS BEEN FORTHCOMING. IF ADDITIONAL INFORMATION IS RECEIVED A SUPPLEMENTAL MEDWATCH REPORT…	Lens Retention	Unknown
https://www.accessdata.fda.gov/scripts/cdrh/cfdocs/cfMAUDE/Detail.CFM?MDRFOI__ID=11024114&pc=QCB	2023826-2020-03041	NA	Malfunction	STAAR SURGICAL COMPANY	2020-12-16 05:00:00	QCB	IMPLANTABLE COLLAMER LENS	Misfocusing; Off-Label Use; Device Dislodged or Dislocated	Blurred Vision	N/A	NA	1	Event Description: THE REPORTER STATED THAT THE SURGEON IMPLANTED A 12.1MM VTICM5_12.1, -6.5/+2.5/095 (SPHERE/CYLINDER/AXIS) INTO THE PATIENT'S LEFT EYE (OS) ON (B)(6) 2020. THE SURGEON REPORTS RESIDUAL ERROR AND LENS ROTATION. Manufacturer Narrative: CLAIM# (B)(4). Manufacturer Narrative: CORRECTED DATA: B5 - "-6.5/+2.5/095" FOR IMPLANTED LENS SPHERE/CYLINDER/AXIS SHOULD BE CORRECTED TO "-8.50/2…	Lens Retention	Unknown
https://www.accessdata.fda.gov/scripts/cdrh/cfdocs/cfMAUDE/Detail.CFM?MDRFOI__ID=11024133&pc=QCB	2023826-2020-03040	NA	Malfunction	STAAR SURGICAL COMPANY	2020-12-16 05:00:00	QCB	IMPLANTABLE COLLAMER LENS	Misfocusing; Off-Label Use; Device Dislodged or Dislocated	Blurred Vision	N/A	NA	1	Event Description: THE REPORTER STATED THAT THE SURGEON IMPLANTED A 12.1MM VTICM5_12.1, -6.0/+2.5/065 (SPHERE/CYLINDER/AXIS) INTO THE PATIENT'S RIGHT EYE (OD) ON (B)(6) 2020. THE SURGEON REPORTS RESIDUAL ERROR AND LENS ROTATION. Manufacturer Narrative: CLAIM# (B)(4). Manufacturer Narrative: BIRTH YEAR: (B)(6). DATE OF EVENT- UNK. PMA/510(K): THIS PRODUCT IS MANUFACTURED IN THE U.S. BUT NOT MARKET…	Lens Retention	Unknown
https://www.accessdata.fda.gov/scripts/cdrh/cfdocs/cfMAUDE/Detail.CFM?MDRFOI__ID=11024129&pc=QCB	2023826-2020-03049	2020-06-29	Injury	STAAR SURGICAL COMPANY	2020-12-16	QCB	IMPLANTABLE COLLAMER LENS	Misfocusing; Improper or Incorrect Procedure or Method	Blurred Vision	N/A	NA	1	Event Description: THE REPORTER STATED THAT THE SURGEON IMPLANTED A 13.2MM VTICM5_13.2, -8.5/+3.0/103 (SPHERE/CYLINDER/AXIS) INTO THE PATIENT'S RIGHT EYE (OD) ON (B)(6) 2020. THE SURGEON REPORTS POSTOP UCVA OF 20/50. ON (B)(6) 2020 THE LENS WAS EXCHANGED WITH A DIFFERENT MODEL, SPHERE, AND AXIS LENS AND THE PROBLEM WAS RESOLVED. THE CAUSE OF THE EVENT IS REPORTED AS USER ERROR, THE WRONG POWER LE…	Lens Exchange	Resolved
https://www.accessdata.fda.gov/scripts/cdrh/cfdocs/cfMAUDE/Detail.CFM?MDRFOI__ID=11010445&pc=QCB	2023826-2020-02979	2020-11-03 05:00:00	Malfunction	STAAR SURGICAL COMPANY	2020-12-15 05:00:00	QCB	IMPLANTABLE COLLAMER LENS (ICL)	Misfocusing	Blurred Vision	NA	NA	1	Event Description: THE REPORTER INDICATED THAT A 13.2MM, VTICM5_13.2, -5.50/0.5/030 (SPHERE/CYLINDER/AXIS), IMPLANTABLE COLLAMER LENS WAS IMPLANTED INTO THE PATIENTS LEFT EYE (OS) ON (B)(6) 2020. THE PATIENT EXPERIENCED REFRACTIVE SURPRISE. THE LENS REMAINS IMPLANTED, THE REPORTER STATED "THE DOCTOR DECIDED TO WAIT 3 MONTHS FOR THE PATIENT TO GET USED TO THE CONDITION. THEN A DECISION IS MADE ABO…	Lens Retention	Resolved
https://www.accessdata.fda.gov/scripts/cdrh/cfdocs/cfMAUDE/Detail.CFM?MDRFOI__ID=11012259&pc=QCB	2023826-2020-03019	2020-11-10 05:00:00	Injury	STAAR SURGICAL COMPANY	2020-12-15 05:00:00	QCB	IMPLANTABLE COLLAMER LENS (ICL)	Misfocusing; Device Dislodged or Dislocated	Blurred Vision	N/A	NA	1	Event Description: THE REPORTER INDICATED THAT A 12.1MM, VTICM5_12.1, -7.50/6.0/089 (SPHERE/CYLINDER/AXIS), IMPLANTABLE COLLAMER LENS WAS IMPLANTED INTO THE PATIENT'S RIGHT EYE (OD) ON (B)(6) 2020. LENS ROTATION NOT ASSOCIATED TO A LOW VAULT AND REFRACTIVE SURPRISE WAS OBSERVED. THE LENS REMAINS IMPLANTED. CAUSE OF THE EVENT IS REPORTED AS UNKNOWN. PER REPORTER ON (B)(6) 2020, "PATIENT IN ACCIDEN…	Lens Repositioning	Resolved
https://www.accessdata.fda.gov/scripts/cdrh/cfdocs/cfMAUDE/Detail.CFM?MDRFOI__ID=11012186&pc=QCB	2023826-2020-03008	2020-11-20	Injury	STAAR SURGICAL COMPANY	2020-12-15	QCB	IMPLANTABLE COLLAMER LENS (ICL)	Misfocusing	Blurred Vision	N/A	NA	1	Event Description: THE REPORTER INDICATED THAT THE SURGEON IMPLANTED A 13.2MM VTICMO13.2, -15.50/2.0/155 (SPHERE/CYLINDER/AXIS), IMPLANTABLE COLLAMER LENS INTO THE PATIENT'S RIGHT EYE (OD) ON (B)(6) 2020. THE LENS WAS REMOVED AND REPLACED ON (B)(6) 2020 FOR A SHORTER LENGTH LENS DUE TO REFRACTIVE SURPRISE. THIS RESOLVED THE PROBLEM. CAUSE OF THE EVENT IS REPORTED AS UNKNOWN. Manufacturer Narrativ…	Lens Exchange	Resolved
https://www.accessdata.fda.gov/scripts/cdrh/cfdocs/cfMAUDE/Detail.CFM?MDRFOI__ID=10984844&pc=QCB	2023826-2020-02879	2018-10-24 04:00:00	Injury	STAAR SURGICAL COMPANY	2020-12-10 05:00:00	QCB	IMPLANTABLE COLLAMER LENS (ICL)	Misfocusing; Inadequacy of Device Shape and/or Size	Blurred Vision	N/A	NA	1	Event Description: THE REPORTER INDICATED THAT THE SURGEON IMPLANTED A 12.6MM VTICM5_12.6, -4.50/1.0/159 (SPHERE/CYLINDER/AXIS), IMPLANTABLE COLLAMER LENS INTO THE PATIENT'S RIGHT EYE (OD) ON (B)(6) 2018. LOW VAULT WAS OBSERVED AND REFRACTIVE CHANGE OVERTIME WAS ASSESSED ON (B)(6) 2018 AND (B)(6) 2020. CAUSE OF THE EVENT IS REPORTED AS UNKNOWN.THE LENS REMAINS IMPLANTED. ADDITIONAL INFORMATION HA…	Lens Exchange	Resolved
https://www.accessdata.fda.gov/scripts/cdrh/cfdocs/cfMAUDE/Detail.CFM?MDRFOI__ID=10980485&pc=QCB	2023826-2020-02934	2020-07-13 04:00:00	Injury	STAAR SURGICAL COMPANY	2020-12-09 05:00:00	QCB	IMPLANTABLE COLLAMER LENS (ICL)	Misfocusing; Improper or Incorrect Procedure or Method	Blurred Vision	N/A	NA	1	Event Description: THE REPORTER INDICATED THE SURGEON IMPLANTED A 13.2MM VTICMO13.2 IMPLANTABLE COLLAMER LENS, -10.0/+1.5/020 (SPHERE/CYLINDER/AXIS) INTO THE PATIENT'S RIGHT EYE (OD) ON (B)(6) 2020. ON (B)(6) 2020, THE LENS WAS EXCHANGED WITH A SAME LENGTH AND MODEL, DIFFERENT SPHERE AND AXIS LENS DUE TO REFRACTIVE SURPRISE. THE PROBLEM IS RESOLVED. THE CAUSE OF THE EVENT IS REPORTED AS USER ERRO…	Lens Exchange	Resolved
https://www.accessdata.fda.gov/scripts/cdrh/cfdocs/cfMAUDE/Detail.CFM?MDRFOI__ID=10980505&pc=QCB	2023826-2020-02920	2020-03-09 04:00:00	Injury	STAAR SURGICAL COMPANY	2020-12-09 05:00:00	QCB	IMPLANTABLE COLLAMER LENS (ICL)	Misfocusing; Device Dislodged or Dislocated	Blurred Vision	N/A	NA	1	Event Description: THE REPORTER INDICATED THAT A 12.6MM, VTICM5_12.6, -1.0/+2.5/096 (SPHERE/CYLINDER/AXIS), IMPLANTABLE COLLAMER LENS WAS IMPLANTED INTO THE PATIENT'S RIGHT EYE (OD) ON (B)(6) 2020. ON (B)(6) 2020 THE LENS WASEXPLANTED AND REPLACED WITH A LONGER LENGTH LENS DUE TO BLURRED VISION. THIS EXCHANGE RESOLVED THE PROBLEM. Manufacturer Narrative: B5-CLAIM IS FOR LEFT (OS) AND NOT RIGHT (O…	Lens Exchange	Resolved
https://www.accessdata.fda.gov/scripts/cdrh/cfdocs/cfMAUDE/Detail.CFM?MDRFOI__ID=10980516&pc=QCB	2023826-2020-02910	2020-10-26 04:00:00	Injury	STAAR SURGICAL COMPANY	2020-12-09 05:00:00	QCB	IMPLANTABLE COLLAMER LENS	Misfocusing	Blurred Vision	N/A	NA	1	Event Description: THE REPORTER STATED THAT THE SURGEON IMPLANTED A 12.6MM VTICM5_12.6, -13.0/+1.0/091 (SPHERE/CYLINDER/AXIS) INTO THE PATIENT'S RIGHT EYE (OD) ON (B)(6) 2020. THE SURGEON REPORTS THE LENS WAS IMPLANTED UPSIDE DOWN, LEADING TO REFRACTIVE SURPRISE. REPORTEDLY, THE LENS WAS EXCHANGED. Manufacturer Narrative: B5 - "REPORTEDLY OD EYE WAS DONE." REPLACES "REPORTEDLY, THE LENS WAS EXCHA…	Lens Exchange	Unknown
https://www.accessdata.fda.gov/scripts/cdrh/cfdocs/cfMAUDE/Detail.CFM?MDRFOI__ID=10980478&pc=QCB	2023826-2020-02911	2020-10-26	Malfunction	STAAR SURGICAL COMPANY	2020-12-09	QCB	IMPLANTABLE COLLAMER LENS	Misfocusing	Blurred Vision	N/A	NA	1	Event Description: THE REPORTER STATED THAT THE SURGEON IMPLANTED A 12.6MM VTICM5_12.6, -14.0/+2.0/093 (SPHERE/CYLINDER/AXIS) INTO THE PATIENT'S LEFT EYE (OS) ON (B)(6) 2020. THE SURGEON REPORTS THE LENS WAS IMPLANTED UPSIDE DOWN, LEADING TO REFRACTIVE SURPRISE. Manufacturer Narrative: THIS PRODUCT IS MANUFACTURED IN THE U.S. BUT NOT MARKETED IN THE U.S. LENS WORK ORDER SEARCH-NO SIMILAR COMPLAIN…	Lens Exchange	Unknown
https://www.accessdata.fda.gov/scripts/cdrh/cfdocs/cfMAUDE/Detail.CFM?MDRFOI__ID=10942061&pc=QCB	2023826-2020-02845	2020-11-03 05:00:00	Malfunction	STAAR SURGICAL COMPANY	2020-12-03 05:00:00	QCB	IMPLANTABLE COLLAMER LENS (ICL)	Misfocusing; Off-Label Use	Blurred Vision	NA	NA	1	Event Description: THE REPORTER INDICATED THAT A 13.2MM, VTICM5_13.2, -2.0/+5.0/101 (SPHERE/CYLINDER/AXIS), IMPLANTABLE COLLAMER LENS WAS IMPLANTED INTO THE PATIENTS LEFT EYE (OS) (B)(6) 2020. REFRACTIVE SURPRISE WAS OBSERVED. IT WAS REPORTED THAT REFRACTIVE TREATMENT WAS PERFORMED. LENS REMAINS IMPLANTED. IF ADDITIONAL INFORMATION IS RECEIVED A SUPPLEMENTAL MEDWATCH REPORT WILL BE SUBMITTED. Man…	Lens Retention	Unknown
https://www.accessdata.fda.gov/scripts/cdrh/cfdocs/cfMAUDE/Detail.CFM?MDRFOI__ID=10942069&pc=QCB	2023826-2020-02846	2020-10-13 04:00:00	Injury	STAAR SURGICAL COMPANY	2020-12-03 05:00:00	QCB	IMPLANTABLE COLLAMER LENS (ICL)	Misfocusing; Inadequacy of Device Shape and/or Size; Device Dislodged or Dislocated	Blurred Vision	NA	NA	1	Event Description: THE REPORTER INDICATED THAT A 13.2MM, VTICMO 13.2, -14.0/+2.00/119. (SPHERE/CYLINDER/AXIS), IMPLANTABLE COLLAMER LENS WAS IMPLANTED INTO THE PATIENTS LEFT EYE (OS) ON (B)(6) 2020. ON (B)(6) 2020 THE LENS WAS EXPLANTED DUE TO EXCESSIVE VAULT AND REFRACTIVE SURPRISE. LENS TILTED WAS LISTED AS CAUSE OF EVENT, THE REPORTER STATED " OBSERVED DURING SURGERY AND THIS TILT CAN ALSO EXP…	Lens Extraction	Unknown
https://www.accessdata.fda.gov/scripts/cdrh/cfdocs/cfMAUDE/Detail.CFM?MDRFOI__ID=10942215&pc=QCB	2023826-2020-02847	2020-10-13 04:00:00	Injury	STAAR SURGICAL COMPANY	2020-12-03 05:00:00	QCB	IMPLANTABLE COLLAMER LENS (ICL)	Misfocusing; Inadequacy of Device Shape and/or Size; Device Dislodged or Dislocated	Blurred Vision	NA	NA	1	Event Description: THE REPORTER INDICATED THAT A 13.2MM, VTICM5_13.2, -15.50/+3.0/060. (SPHERE/CYLINDER/AXIS),IMPLANTABLE COLLAMER LENS WAS IMPLANTED INTO THE PATIENTS RIGHT EYE (OD) ON (B)(6) 2020. ON (B)(6) 2020 THE LENS WAS EXPLANTED DUE TO EXCESSIVE VAULT AND REFRACTIVE SURPRISE. LENS TILTED WAS LISTED AS CAUSE OF EVENT, THE REPORTER STATED " OBSERVED DURING SURGERY AND THIS TILT CAN ALSO EXP…	Lens Extraction	Unknown
https://www.accessdata.fda.gov/scripts/cdrh/cfdocs/cfMAUDE/Detail.CFM?MDRFOI__ID=10937922&pc=QCB	2023826-2020-02787	2020-09-30	Injury	STAAR SURGICAL COMPANY	2020-12-03	QCB	IMPLANTABLE COLLAMER LENS (ICL)	Misfocusing	Blurred Vision	P030016	NA	1	Event Description: THE REPORTER INDICATED THAT A 13.2MM, TMICL13.2, -5.50/2.5/161 (SPHERE/CYLINDER/AXIS), IMPLANTABLE COLLAMER LENS WAS IMPLANTED INTO THE PATIENT'S RIGHT EYE (OD) ON (B)(6) 2020. ON (B)(6) 2020 THE LENS WAS REMOVED AND REPLACED WITH A SHORTER LENGTH LENS DUE TO REFRACTIVE SURPRISE, GLARE/HALOES, AND BLURRED VISION. THIS RESOLVED THE PROBLEM. CAUSE OF THE EVENT IS REPORTED AS USER…	Lens Exchange	Resolved
https://www.accessdata.fda.gov/scripts/cdrh/cfdocs/cfMAUDE/Detail.CFM?MDRFOI__ID=10930495&pc=QCB	2023826-2020-02836	2020-08-27 04:00:00	Injury	STAAR SURGICAL COMPANY	2020-12-01 05:00:00	QCB	IMPLANTABLE COLLAMER LENS (ICL)	Misfocusing	Blurred Vision	N/A	NA	1	Event Description: THE REPORTER INDICATED THE SURGEON IMPLANTED A 12.1MM VTICM5_12.1 IMPLANTABLE COLLAMER LENS, -12.5/+1.5/107 (SPHERE/CYLINDER/AXIS) INTO THE PATIENT'S RIGHT EYE (OD) ON (B)(6) 2020. ON (B)(6) 2020 THE LENS WAS EXCHANGED WITH A SAME SIZE AND MODEL, SIMILAR SPHERE/CYLINDER/AXIS LENS DUE TO REFRACTIVE SURPRISE. THE PROBLEM IS RESOLVED. THE CAUSE OF THE EVENT IS REPORTED AS UNKNOWN.…	Lens Exchange	Resolved
https://www.accessdata.fda.gov/scripts/cdrh/cfdocs/cfMAUDE/Detail.CFM?MDRFOI__ID=10899949&pc=QCB	2023826-2020-02740	2020-09-08 04:00:00	Injury	STAAR SURGICAL COMPANY	2020-11-25 05:00:00	QCB	IMPLANTABLE COLLAMER LENS (ICL)	Misfocusing	Blurred Vision	P030016	NA	1	Event Description: THE REPORTER INDICATED THE SURGEON IMPLANTED A 12.6MM TMICL12.6 IMPLANTABLE COLLAMER LENS, -07.00/+2.0/112 (SPHERE/CYLINDER/AXIS), IN THE PATIENTS LEFT EYE (OS) ON (B)(6) 2020. THE LENS WAS EXPLANTED ON (B)(6) 2020 DUE TO PATIENT EXPERIENCED POOR VISUAL ACUITY. THE SURGEON DID NOT IMPLANT ANOTHER ICL LENS. ADDITIONAL INFORMATION HAS BEEN REQUESTED BUT NONE HAS BEEN FORTHCOMING.…	Lens Extraction	Unknown
https://www.accessdata.fda.gov/scripts/cdrh/cfdocs/cfMAUDE/Detail.CFM?MDRFOI__ID=10899956&pc=QCB	2023826-2020-02741	2020-09-08 04:00:00	Injury	STAAR SURGICAL COMPANY	2020-11-25 05:00:00	QCB	IMPLANTABLE COLLAMER LENS (ICL)	Misfocusing	Blurred Vision	P030016	NA	1	Event Description: THE REPORTER INDICATED THE SURGEON IMPLANTED A 12.6MM TMICL12.6 IMPLANTABLE COLLAMER LENS, -09.50/+4.0/171 (SPHERE/CYLINDER/AXIS), IN THE PATIENTS RIGHT EYE (OD) ON (B)(6) 2020. THE LENS WAS EXPLANTED ON (B)(6) 2020 DUE TO PATIENT EXPERIENCED POOR VISUAL ACUITY. THE SURGEON DID NOT IMPLANT ANOTHER ICL LENS. ADDITIONAL INFORMATION HAS BEEN REQUESTED BUT NONE HAS BEEN FORTHCOMING…	Lens Extraction	Unknown
https://www.accessdata.fda.gov/scripts/cdrh/cfdocs/cfMAUDE/Detail.CFM?MDRFOI__ID=10905489&pc=QCB	2023826-2020-02738	NA	Malfunction	STAAR SURGICAL COMPANY	2020-11-25 05:00:00	QCB	IMPLANTABLE COLLAMER LENS (ICL)	Misfocusing; Inadequacy of Device Shape and/or Size	Blurred Vision	N/A	NA	1	Event Description: THE REPORTER INDICATED THAT REFRACTIVE SURPRISE HAS BEEN OBSERVED IN PATIENT. ADDITIONAL INFORMATION HAS BEEN REQUESTED BUT NONE HAS BEEN FORTHCOMING. IF ADDITIONAL INFORMATION IS RECEIVED A SUPPLEMENTAL MEDWATCH REPORT WILL BE SUBMITTED. Manufacturer Narrative: ADDITIONAL INFORMATION: B5 - THE REPORTER INDICATED THAT A 13.2MM, VTICMO13.2, -16.00/0.5/122 (SPHERE/CYLINDER/AXIS),…	Lens Retention	Unknown
https://www.accessdata.fda.gov/scripts/cdrh/cfdocs/cfMAUDE/Detail.CFM?MDRFOI__ID=10905491&pc=QCB	2023826-2020-02726	2020-09-21 04:00:00	Injury	STAAR SURGICAL COMPANY	2020-11-25 05:00:00	QCB	IMPLANTABLE COLLAMER LENS (ICL)	Misfocusing	Blurred Vision	N/A	NA	1	Event Description: THE REPORTER INDICATED THAT A 12.6MM, VTICM5_12.6, -14.00/2.0/075 (SPHERE/CYLINDER/AXIS), IMPLANTABLE COLLAMER LENS WAS IMPLANTED INTO THE PATIENT'S LEFT EYE (OS) ON (B)(6) 2020. ON (B)(6) 2020 THE LENS WAS EXCHANGED WITH A SAME SIZE, SIMILARE (SPHERE/CYLINDER/AXIS) LENS DUE TO REFRACTIVE SURPRISE. THE PROBLEM WAS RESOLVED. CAUSE OF THE EVENT IS REPORTED AS UNKNOWN. Manufacture…	Lens Exchange	Resolved
https://www.accessdata.fda.gov/scripts/cdrh/cfdocs/cfMAUDE/Detail.CFM?MDRFOI__ID=10905564&pc=QCB	2023826-2020-02725	2020-09-21 04:00:00	Injury	STAAR SURGICAL COMPANY	2020-11-25 05:00:00	QCB	IMPLANTABLE COLLAMER LENS (ICL)	Misfocusing	Blurred Vision	N/A	NA	1	Event Description: THE REPORTER INDICATED THAT A 12.6MM, VTICM5_12.6, -13.50/1.5/104 (SPHERE/CYLINDER/AXIS), IMPLANTABLE COLLAMER LENS WAS IMPLANTED INTO THE PATIENT'S RIGHT EYE (OD) ON (B)(6) 2020. ON (B)(6) 2020 THE LENS WAS EXCHANGED WITH A SAME SIZE , SIMILARE (SPHERE/CYLINDER/AXIS) LENS DUE TO REFRACTIVE SURPRISE. THE PROBLEM WAS RESOLVED. CAUSE OF THE EVENT IS REPORTED AS UNKNOWN. Manufactu…	Lens Exchange	Resolved
https://www.accessdata.fda.gov/scripts/cdrh/cfdocs/cfMAUDE/Detail.CFM?MDRFOI__ID=10851802&pc=QCB	2023826-2020-02723	2020-09-16 04:00:00	Injury	STAAR SURGICAL COMPANY	2020-11-17 05:00:00	QCB	IMPLANTABLE COLLAMER LENS (ICL)	Misfocusing	Blurred Vision	N/A	NA	1	Event Description: THE REPORTER INDICATED THAT A 12.6MM, VTICMO12.6, -7.50/4.0/001 (SPHERE/CYLINDER/AXIS), IMPLANTABLE COLLAMER LENS WAS IMPLANTED INTO THE PATIENT'S LEFT EYE (OS) ON (B)(6) 2020. REFRACTIVE SURPRISE WAS OBSERVED. THE LENS WAS EXCHANGED FOR SAME LENGTH LENS ON (B)(6) 2020 RESOLVED THE PROBLEM. CAUSE OF THE EVENT IS REPORTED AS USER ERROR, "SURGEON FORGOT TO ENTER THE NEGATIVE SIGN…	Lens Exchange	Resolved
https://www.accessdata.fda.gov/scripts/cdrh/cfdocs/cfMAUDE/Detail.CFM?MDRFOI__ID=10852506&pc=QCB	2023826-2020-02673	2020-04-09 04:00:00	Injury	STAAR SURGICAL COMPANY	2020-11-17 05:00:00	QCB	IMPLANTABLE COLLAMER LENS (ICL)	Misfocusing; Inadequacy of Device Shape and/or Size	Blurred Vision	NA#S-P#NA	NA	1	Event Description: THE REPORTER INDICATED THE SURGEON IMPLANTED A 13.2MM VTICMO13.2 IMPLANTABLE COLLAMER LENS, -07.00/+1.0/096 (SPHERE/CYLINDER/AXIS), IN THE PATIENTS LEFT EYE (OS), ON (B)(6) 2020. THE LENS WAS EXPLANTED ON (B)(6) 2020 DUE TO LOW VAULTING AND BLURRED VISION. THE LENS WAS EXCHANGED FOR A LONGER LENS AND THE PROBLEM WAS RESOLVED. THE CAUSE OF THE EVENT WAS UNKNOWN. Manufacturer Nar…	Lens Exchange	Resolved
https://www.accessdata.fda.gov/scripts/cdrh/cfdocs/cfMAUDE/Detail.CFM?MDRFOI__ID=10856344&pc=QCB	2023826-2020-02700	2020-07-14 04:00:00	Injury	STAAR SURGICAL COMPANY	2020-11-17 05:00:00	QCB	IMPLANTABLE COLLAMER LENS (ICL)	Misfocusing	Blurred Vision	N/A	NA	1	Event Description: THE REPORTER INDICATED THE SURGEON IMPLANTED A 12.6MM VTICMO12.6 IMPLANTABLE COLLAMER LENS, -9.0/+3.0/097 (SPHERE/CYLINDER/AXIS) INTO THE PATIENT'S RIGHT EYE (OD) ON (B)(6) 2020. ON (B)(6)2020, THE LENS WAS EXCHANGED WITH A SAME SIZE, DIFFERENT MODEL LENS DUE TO REFRACTIVE SURPRISE. THE PROBLEM IS RESOLVED. THE CAUSE OF THE EVENT IS REPORTED AS UNKNOWN. Manufacturer Narrative: …	Lens Exchange	Resolved
https://www.accessdata.fda.gov/scripts/cdrh/cfdocs/cfMAUDE/Detail.CFM?MDRFOI__ID=10851799&pc=QCB	2023826-2020-02664	2020-10-13	Malfunction	STAAR SURGICAL COMPANY	2020-11-17	QCB	IMPLANTABLE COLLAMER LENS (ICL)	Misfocusing	Blurred Vision	N/A	NA	1	Event Description: THE REPORTER INDICATED THAT A 12.6MM, VTICM5_12.6, -14.00/1.5/089 (SPHERE/CYLINDER/AXIS), IMPLANTABLE COLLAMER LENS WAS IMPLANTED INTO THE PATIENT'S LEFT EYE (OS) ON (B)(6) 2019. REFRACTIVE SURPRISE OVERTIME WAS OBSERVED, THE LENS REMAINS IMPLANTED. CAUSE OF THE EVENT IS REPORTED AS UNKNOWN. PER REPORTER ON (B)(6) 2020, SURGEON "HAS DECIDED TO MONITOR AND ON HOLD FOR THE LENS E…	Lens Retention	Unknown
https://www.accessdata.fda.gov/scripts/cdrh/cfdocs/cfMAUDE/Detail.CFM?MDRFOI__ID=10851807&pc=QCB	2023826-2020-02724	2020-10-21	Malfunction	STAAR SURGICAL COMPANY	2020-11-17	QCB	IMPLANTABLE COLLAMER LENS (ICL)	Misfocusing	Blurred Vision	P030016	NA	1	Event Description: THE REPORTER INDICATED THAT A 13.7MM, TMICL13.7 -16.00/3.5/034 (SPHERE/CYLINDER/AXIS), IMPLANTABLE COLLAMER LENS WAS IMPLANTED INTO THE PATIENT'S LEFT EYE (OS) ON (B)(6) 2020. REFRACTIVE SURPRISE WAS OBSERVED, THE LENS REMAINS IMPLANTED. REPORTEDLY, "CONSIDERING ROTATION IF NEXT EXAM REVEALS ROTATION OFF AXIS." ADDITIONAL INFORMATION HAS BEEN REQUESTED BUT NONE HAS BEEN FORTHCO…	Lens Retention	Unknown
https://www.accessdata.fda.gov/scripts/cdrh/cfdocs/cfMAUDE/Detail.CFM?MDRFOI__ID=10823677&pc=QCB	2023826-2020-02598	2020-10-16 04:00:00	Injury	STAAR SURGICAL COMPANY	2020-11-11 05:00:00	QCB	IMPLANTABLE COLLAMER LENS (ICL)	Misfocusing	Blurred Vision	N/A	NA	1	Event Description: THE REPORTER INDICATED THAT A 13.2MM, VTICM5_13.2, -7.00/3.0/083 (SPHERE/CYLINDER/AXIS), IMPLANTABLE COLLAMER LENS WAS IMPLANTED INTO THE PATIENT'S LEFT EYE (OS) ON (B)(6) 2020. REFRACTIVE SURPRISE WAS OBSERVED, THE LENS REMAINS IMPLANTED. CAUSE OF THE EVENT IS REPORTED AS UNKNOWN. ADDITIONAL INFORMATION HAS BEEN REQUESTED BUT NONE HAS BEEN FORTHCOMING. IF ADDITIONAL INFORMATIO…	Lens Exchange	Not_Resolved
https://www.accessdata.fda.gov/scripts/cdrh/cfdocs/cfMAUDE/Detail.CFM?MDRFOI__ID=10824095&pc=QCB	2023826-2020-02661	2020-08-05 04:00:00	Injury	STAAR SURGICAL COMPANY	2020-11-11 05:00:00	QCB	IMPLANTABLE COLLAMER LENS (ICL)	Misfocusing; Off-Label Use	Blurred Vision	NA	NA	1	Event Description: THE REPORTER INDICATED THAT A 12.6MM, VTICMO12.6, -16.5/2.0/082 (SPHERE/CYLINDER/AXIS), IMPLANTABLE COLLAMER LENS WAS IMPLANTED INTO THE PATIENTS RIGHT EYE (OD) ON (B)(6) 2020. ON (B)(6) 2020 THE LENS WAS EXCHANGED FOR A DIFFERENT DIOPTER LENS DUE TO REFRACTIVE SURPRISE. THIS EXCHANGE RESOLVED THE PROBLEM. Manufacturer Narrative: H3 - DEVICE EVALUATION: LENS WAS RETURNED IN A M…	Lens Exchange	Resolved
https://www.accessdata.fda.gov/scripts/cdrh/cfdocs/cfMAUDE/Detail.CFM?MDRFOI__ID=10795929&pc=QCB	2023826-2020-02572	2020-08-27 04:00:00	Injury	STAAR SURGICAL COMPANY	2020-11-05 05:00:00	QCB	IMPLANTABLE COLLAMER LENS (ICL)	Misfocusing; Device Dislodged or Dislocated	Blurred Vision	NA#S-P#NA	NA	1	Event Description: THE REPORTER INDICATED THE SURGEON IMPLANTED A 12.6MM VTICM5_12.6 IMPLANTABLE COLLAMER LENS, -13.00/+6.0/105 (SPHERE/CYLINDER/AXIS), IN THE PATIENTS RIGHT EYE (OD). THE LENS WAS REPORTED AS LENS ROTATION NOT ASSOCIATED TO A LOW VAULT. THE PATIENT EXPERIENCED A REFRACTIVE SURPRISE, LOSS OF BCVA, BLURRED VISION AND REFRACTIVE CHANGE OVERTIME. THE LENS REMAINED IMPLANTED. THE CAUS…	Lens Exchange	Resolved
https://www.accessdata.fda.gov/scripts/cdrh/cfdocs/cfMAUDE/Detail.CFM?MDRFOI__ID=11122217&pc=QCB	2023826-2021-00072	2020-12-07 05:00:00	Injury	STAAR SURGICAL COMPANY	2021-01-06 05:00:00	QCB	IMPLANTABLE COLLAMER LENS (ICL)	Misfocusing; Inadequacy of Device Shape and/or Size	Blurred Vision	N/A	NA	1	Event Description: THE REPORTER INDICATED THAT A 12.6MM, VTICM5_12.6, -10.00/1.0/082 (SPHERE/CYLINDER/AXIS), IMPLANTABLE COLLAMER LENS WAS IMPLANTED INTO THE PATIENTS LEFT EYE (OS) ON (B)(6) 2020. ON (B)(6) 2020 THE LENS WAS EXCHANGED FOR A LONGER LENGTH LENS DUE TO LOW VAULT WITH ROTATION AND REFRACTIVE SURPRISE THIS EXCHANGE RESOLVED THE PROBLEM. Manufacturer Narrative: H3- DEVICE EVALUATION: L…	Lens Exchange	Resolved
https://www.accessdata.fda.gov/scripts/cdrh/cfdocs/cfMAUDE/Detail.CFM?MDRFOI__ID=11129308&pc=QCB	2023826-2021-00078	2020-11-19	Injury	STAAR SURGICAL COMPANY	2021-01-07	QCB	IMPLANTABLE COLLAMER LENS (ICL)	Misfocusing; Device Dislodged or Dislocated	Blurred Vision	NA	NA	1	Event Description: THE REPORTER INDICATED THAT A 13.2MM, VTICM5_13.2, -3.0/1.5/172 (SPHERE/CYLINDER/AXIS), IMPLANTABLE COLLAMER LENS WAS IMPLANTED INTO THE PATIENTS RIGHT EYE (OD) ON (B)(6) 2020. LENS ROTATION NOT ASSOCIATED TO A LOW VAULT ,REFRACTIVE SURPRISE AND BLURRED VISION WAS OBSERVED. ON (B)(6) 2020 LENS REPOSITIONING WAS PERFORMED BUT IT DID NOT RESOLVE THE PROBLEM. ADDITIONAL INFORMATIO…	Lens Repositioning	Not_Resolved
https://www.accessdata.fda.gov/scripts/cdrh/cfdocs/cfMAUDE/Detail.CFM?MDRFOI__ID=11159195&pc=QCB	2023826-2021-00128	2020-12-22 05:00:00	Injury	STAAR SURGICAL COMPANY	2021-01-13 05:00:00	QCB	IMPLANTABLE COLLAMER LENS	Misfocusing; Improper or Incorrect Procedure or Method	Blurred Vision	N/A	NA	1	Event Description: THE REPORTER STATED THAT THE SURGEON IMPLANTED A 13.2MM VTICM5_13.2, -5.5/+1.0/074 (SPHERE/CYLINDER/AXIS) INTO THE PATIENT'S RIGHT EYE (OD) ON (B)(6) 2020. THE SURGEON REPORTS REFRACTIVE SURPRISE. REPORTEDLY, LENS REMAINS IMPLANTED. THE CAUSE OF THE EVENT IS REPORTED AS USER ERROR: THE WRONG CALCULATED LENS WAS IMPLANTED. Manufacturer Narrative: B1-UPDATED. B5-UPDATED INFORMATI…	Lens Exchange	Resolved
https://www.accessdata.fda.gov/scripts/cdrh/cfdocs/cfMAUDE/Detail.CFM?MDRFOI__ID=11159208&pc=QCB	2023826-2021-00121	2020-10-23 04:00:00	Injury	STAAR SURGICAL COMPANY	2021-01-13 05:00:00	QCB	IMPLANTABLE COLLAMER LENS (ICL)	Misfocusing	Blurred Vision	N/A	NA	1	Event Description: THE REPORTER INDICATED THE SURGEON IMPLANTED A 12.6MM VTICMO12.6 IMPLANTABLE COLLAMER LENS, -16.5/+4.0/101 (SPHERE/CYLINDER/AXIS) INTO THE PATIENT'S RIGHT EYE (OD) ON (B)(6) 2020. ON (B)(6) 2020 THE LENS WAS EXCHANGED WITH A LONGER LENS DUE TO REFRACTIVE SURPRISE. THE PROBLEM IS RESOLVED. THE CAUSE OF THE EVENT IS REPORTED AS UNKNOWN. Manufacturer Narrative: ADDITIONAL INFORMAT…	Lens Exchange	Resolved
https://www.accessdata.fda.gov/scripts/cdrh/cfdocs/cfMAUDE/Detail.CFM?MDRFOI__ID=11159253&pc=QCB	2023826-2021-00123	2020-11-26 05:00:00	Injury	STAAR SURGICAL COMPANY	2021-01-13 05:00:00	QCB	IMPLANTABLE COLLAMER LENS (ICL)	Misfocusing; Patient-Device Incompatibility	Blurred Vision	N/A	NA	1	Event Description: THE REPORTER INDICATED THE SURGEON IMPLANTED A 12.6MM VTICM5_12.6 IMPLANTABLE COLLAMER LENS, -11.0/+6.0/079 (SPHERE/CYLINDER/AXIS) INTO THE PATIENT'S LEFT EYE (OS) ON (B)(6) 2020. ON (B)(6) 2020 THE LENS WAS RESPOSITIONED DUE TO REFRACTIVE SURPRISE WHICH DID NOT RESOLVE THE PROBLEM. ON (B)(6) 2020 THE LENS WAS REMOVED AND REPLACED WITH A SAME SIZE DIFFERENT AXIS LENS DUE TO REF…	Lens Exchange	Not_Resolved
https://www.accessdata.fda.gov/scripts/cdrh/cfdocs/cfMAUDE/Detail.CFM?MDRFOI__ID=11159266&pc=QCB	2023826-2021-00124	NA	Malfunction	STAAR SURGICAL COMPANY	2021-01-13 05:00:00	QCB	IMPLANTABLE COLLAMER LENS (ICL)	Misfocusing	Blurred Vision	N/A	NA	1	Event Description: THE REPORTER INDICATED THE SURGEON IMPLANTED A 12.6MM VTICM5_12.6 IMPLANTABLE COLLAMER LENS, -11.0/+6.0/092 (SPHERE/CYLINDER/AXIS) INTO THE PATIENT'S LEFT EYE (OS) ON (B)(6) 2020. THE SURGEON REPORTS REFRACTIVE SURPRISE. REPORTEDLY, THE LENS REMAINS IMPLANTED. Manufacturer Narrative: ADDITIONAL INFORMATION: H3-DEVICE EVALUATION: LENS RETURNED IN A MICRO-CENTRIFUGE VIAL; DRY WIT…	Lens Retention	Unknown
https://www.accessdata.fda.gov/scripts/cdrh/cfdocs/cfMAUDE/Detail.CFM?MDRFOI__ID=11161084&pc=QCB	2023826-2021-00130	2020-11-20 05:00:00	Injury	STAAR SURGICAL COMPANY	2021-01-13 05:00:00	QCB	IMPLANTABLE COLLAMER LENS (ICL)	Inadequacy of Device Shape and/or Size	Blurred Vision	NA	NA	1	Event Description: THE REPORTER INDICATED THAT A 12.6MM, VTICM5_12.6, -5.50/1.0/090(SPHERE/CYLINDER/AXIS), IMPLANTABLE COLLAMER LENS WAS IMPLANTED INTO THE PATIENTS RIGHT EYE (OD) ON (B)(6) 2017. LOW VAULT AND REFRACTIVE CHANGE OVERTIME WAS OBSERVED. LENS REMAINS IMPLANTED. ADDITIONAL INFORMATION HAS BEEN REQUESTED BUT NONE HAS BEEN FORTHCOMING. IF ADDITIONAL INFORMATION IS RECEIVED A SUPPLEMENTA…	Lens Exchange	Resolved
https://www.accessdata.fda.gov/scripts/cdrh/cfdocs/cfMAUDE/Detail.CFM?MDRFOI__ID=11161342&pc=QCB	2023826-2021-00131	2020-11-20 05:00:00	Injury	STAAR SURGICAL COMPANY	2021-01-13 05:00:00	QCB	IMPLANTABLE COLLAMER LENS (ICL)	Inadequacy of Device Shape and/or Size	Blurred Vision	NA	NA	1	Event Description: THE REPORTER INDICATED THAT A 12.6MM, VTICM5_12.6, -5.00/1.0/090(SPHERE/CYLINDER/AXIS), IMPLANTABLE COLLAMER LENS WAS IMPLANTED INTO THE PATIENTS LEFT EYE (OS) ON (B)(6) 2017. LOW VAULT AND REFRACTIVE CHANGE OVERTIME WAS OBSERVED. LENS REMAINS IMPLANTED. ADDITIONAL INFORMATION HAS BEEN REQUESTED BUT NONE HAS BEEN FORTHCOMING. IF ADDITIONAL INFORMATION IS RECEIVED A SUPPLEMENTAL…	Lens Retention	Unknown
https://www.accessdata.fda.gov/scripts/cdrh/cfdocs/cfMAUDE/Detail.CFM?MDRFOI__ID=11168375&pc=QCB	2023826-2021-00142	2017-01-17 05:00:00	Malfunction	STAAR SURGICAL COMPANY	2021-01-13 05:00:00	QCB	IMPLANTABLE COLLAMER LENS (ICL)	Misfocusing; Off-Label Use; Device Dislodged or Dislocated	Blurred Vision	NA#S-P#NA	NA	1	Event Description: THE REPORTER INDICATED THE SURGEON IMPLANTED A 12.6MM VTICMO12.6 IMPLANTABLE COLLAMER LENS, -07.00/+3.0/152 (SPHERE/CYLINDER/AXIS), IN THE PATIENTS RIGHT EYE (OD) ON (B)(6) 2017. THE REPORTER INDICATED THE PATIENT EXPERIENCED A REFRACTIVE SURPRISE AND BLURRED VISION. THE LENS REMAINED IMPLANTED. THE CAUSE OF THE EVENT WAS UNKNOWN. ADDITIONAL INFORMATION HAS BEEN REQUESTED BUT N…	Lens Retention	Unknown
https://www.accessdata.fda.gov/scripts/cdrh/cfdocs/cfMAUDE/Detail.CFM?MDRFOI__ID=11196998&pc=QCB	2023826-2021-00180	2020-11-16 05:00:00	Injury	STAAR SURGICAL COMPANY	2021-01-19 05:00:00	QCB	IMPLANTABLE COLLAMER LENS (ICL)	Misfocusing; Off-Label Use; Inadequacy of Device Shape and/or Size	Blurred Vision	N/A	NA	1	Event Description: THE REPORTER INDICATED THE SURGEON IMPLANTED A 12.6MM VTICM5_12.6 IMPLANTABLE COLLAMER LENS, -8.0/+1.0/091 (SPHERE/CYLINDER/AXIS) INTO THE PATIENT'S LEFT EYE (OS) ON (B)(6) 2020. ON (B)(6) 2020, THE LENS WAS EXCHANGED WITH A SHORTER LENS DUE TO EXCESSIVE VAULT AND REFRACTIVE SURPRISE. THE PROBLEM IS RESOLVED. Manufacturer Narrative: ADDITIONAL INFORMATION: H3-DEVICE EVALUATION:…	Lens Exchange	Resolved
https://www.accessdata.fda.gov/scripts/cdrh/cfdocs/cfMAUDE/Detail.CFM?MDRFOI__ID=11197000&pc=QCB	2023826-2021-00179	2020-11-16 05:00:00	Injury	STAAR SURGICAL COMPANY	2021-01-19 05:00:00	QCB	IMPLANTABLE COLLAMER LENS (ICL)	Misfocusing; Inadequacy of Device Shape and/or Size	Blurred Vision	N/A	NA	1	Event Description: THE REPORTER INDICATED THE SURGEON IMPLANTED A 12.6MM VTICM5_12.6 IMPLANTABLE COLLAMER LENS, -8.0/+2.5/082 (SPHERE/CYLINDER/AXIS) INTO THE PATIENT'S RIGHT EYE (OD) ON (B)(6) 2020. ON (B)(6) 2020, THE LENS WAS EXCHANGED WITH A SHORTER LENS DUE TO EXCESSIVE VAULT AND REFRACTIVE SURPRISE. THE PROBLEM IS RESOLVED. Manufacturer Narrative: ADDITIONAL INFORMATION: H3-DEVICE EVALUATION…	Lens Exchange	Resolved
https://www.accessdata.fda.gov/scripts/cdrh/cfdocs/cfMAUDE/Detail.CFM?MDRFOI__ID=11231160&pc=QCB	2023826-2021-00208	2020-11-10 05:00:00	Injury	STAAR SURGICAL COMPANY	2021-01-26 05:00:00	QCB	IMPLANTABLE COLLAMER LENS (ICL)	Inadequacy of Device Shape and/or Size	Blurred Vision	NA#S-P#NA	NA	1	Event Description: THE REPORTER INDICATED THE SURGEON IMPLANTED A 13.7MM VTICM5_13.7 IMPLANTABLE COLLAMER LENS, -05.50/+4.5/096 (SPHERE/CYLINDER/AXIS), IN THE PATIENTS LEFT EYE (OS), ON (B)(6) 2020. THE LENS WAS EXPLANTED ON (B)(6) 2021 DUE TO EXCESSIVE VAULTING AND BLURRED VISION. THE LENS WAS EXCHANGED FOR A SHORTER LENS AND THE PROBLEM WAS RESOLVED. THE CAUSE OF THE EVENT WAS DUE TO USER ERROR…	Lens Exchange	Resolved
https://www.accessdata.fda.gov/scripts/cdrh/cfdocs/cfMAUDE/Detail.CFM?MDRFOI__ID=11238059&pc=QCB	2023826-2021-00174	2020-12-07 05:00:00	Injury	STAAR SURGICAL COMPANY	2021-01-27 05:00:00	QCB	IMPLANTABLE COLLAMER LENS (ICL)	Misfocusing	Blurred Vision	N/A	NA	1	Event Description: THE REPORTER INDICATED THAT A 13.7MM, VTICM5_13.7, -13.00/2.0/096 (SPHERE/CYLINDER/AXIS), IMPLANTABLE COLLAMER LENS WAS IMPLANTED INTO THE PATIENT'S RIGHT EYE (OD) ON (B)(6) 2019. REFRACTIVE SURPRISE WAS OBSERVED, THE LENS REMAINS IMPLANTED. CAUSE OF THE EVENT IS REPORTED AS UNKNOWN. ADDITIONAL INFORMATION HAS BEEN REQUESTED BUT NONE HAS BEEN FORTHCOMING. IF ADDITIONAL INFORMAT…	Lens Repositioning	Resolved
https://www.accessdata.fda.gov/scripts/cdrh/cfdocs/cfMAUDE/Detail.CFM?MDRFOI__ID=11238071&pc=QCB	2023826-2021-00166	2020-03-11 04:00:00	Malfunction	STAAR SURGICAL COMPANY	2021-01-27 05:00:00	QCB	IMPLANTABLE COLLAMER LENS (ICL)	Misfocusing	Blurred Vision	N/A	NA	1	Event Description: THE REPORTER INDICATED THAT A 13.2MM, VTICM5_13.2, -6.00/2.0/166 (SPHERE/CYLINDER/AXIS), IMPLANTABLE COLLAMER LENS WAS IMPLANTED INTO THE PATIENT'S RIGHT EYE (OD) ON (B)(6) 2020. REFRACTIVE SURPRISE WAS OBSERVED AND THE LENS REMAINS IMPLANTED. CAUSE OF THE EVENT IS REPORTED AS UNKNOWN. ADDITIONAL INFORMATION HAS BEEN REQUESTED BUT NONE HAS BEEN FORTHCOMING. IF ADDITIONAL INFORM…	Lens Retention	Unknown
https://www.accessdata.fda.gov/scripts/cdrh/cfdocs/cfMAUDE/Detail.CFM?MDRFOI__ID=11239144&pc=QCB	2023826-2021-00215	NA	Malfunction	STAAR SURGICAL COMPANY	2021-01-27 05:00:00	QCB	IMPLANTABLE COLLAMER LENS	Misfocusing; Off-Label Use	Blurred Vision	N/A	NA	1	Event Description: THE REPORTER STATED THAT THE SURGEON IMPLANTED A 13.2MM VTICM5_13.2, -13.5/+3.5/093 (SPHERE/CYLINDER/AXIS) INTO THE PATIENT'S LEFT EYE (OS). THE SURGEON REPORTS REFRACTIVE SURPRISE. REPORTEDLY, LENS REMAINS IMPLANTED. Manufacturer Narrative: B5-ADDITIONAL INFORMATION: THE REPORTER STATES THAT THE PATIENT ISN'T COMING IN FOR A FOLLOW-UP. THE PATIENT IS HAPPY WITH THEIR VISION. C…	Lens Retention	Resolved
https://www.accessdata.fda.gov/scripts/cdrh/cfdocs/cfMAUDE/Detail.CFM?MDRFOI__ID=11239149&pc=QCB	2023826-2021-00214	NA	Malfunction	STAAR SURGICAL COMPANY	2021-01-27 05:00:00	QCB	IMPLANTABLE COLLAMER LENS	Misfocusing; Off-Label Use	Blurred Vision	N/A	NA	1	Event Description: THE REPORTER STATED THAT THE SURGEON IMPLANTED A 13.2MM VTICM5_13.2, -12.5/+3.5/094 (SPHERE/CYLINDER/AXIS) INTO THE PATIENT'S RIGHT EYE (OD). THE SURGEON REPORTS REFRACTIVE SURPRISE. REPORTEDLY, LENS REMAINS IMPLANTED. Manufacturer Narrative: B5-ADDITIONAL INFORMATION: ACCORDING TO THE REPORTER, THE PATIENT ISN'T COMING IN FOR A FOLLOW-UP. THE PATIENT IS HAPPY WITH THEIR VISION…	Lens Retention	Resolved
https://www.accessdata.fda.gov/scripts/cdrh/cfdocs/cfMAUDE/Detail.CFM?MDRFOI__ID=11273779&pc=QCB	2023826-2021-00228	2020-11-11	Malfunction	STAAR SURGICAL COMPANY	2021-02-03	QCB	IMPLANTABLE COLLAMER LENS (ICL)	Misfocusing	Blurred Vision	N/A	NA	1	Event Description: THE REPORTER INDICATED THAT A 13.2MM, VTICM5_13.2, -13.50/1.5/061 (SPHERE/CYLINDER/AXIS), IMPLANTABLE COLLAMER LENS WAS IMPLANTED INTO THE PATIENT'S LEFT EYE (OS) ON (B)(6) 2020. REFRACTIVE SURPRISE WAS OBSERVED, THE LENS REMAINS IMPLANTED. REPORTEDLY, ROTATION SUSPECT. CAUSE OF THE EVENT IS REPORTED AS UNKNOWN. ADDITIONAL INFORMATION HAS BEEN REQUESTED BUT NONE HAS BEEN FORTHC…	Lens Retention	Unknown
https://www.accessdata.fda.gov/scripts/cdrh/cfdocs/cfMAUDE/Detail.CFM?MDRFOI__ID=11277279&pc=QCB	2023826-2021-00298	NA	Injury	STAAR SURGICAL COMPANY	2021-02-04 05:00:00	QCB	IMPLANTABLE COLLAMER LENS (ICL)	Misfocusing	Blurred Vision	NA	NA	1	Event Description: THE REPORTER INDICATED THAT A 12.6MM, VTICM5_12.6, -9.50/4.0/73, IMPLANTABLE COLLAMER LENS WAS IMPLANTED INTO THE PATIENTS LEFT EYE (OS) ON (B)(6) 2020. ON (B)(6) 2020 THE LENS WAS EXCHANGED FOR A DIFFERENT DIOPTER LENS DUE TO REFRACTIVE SURPRISE. THIS EXCHANGE RESOLVED THE PROBLEM. " WOUND STABLE, ICL ON AXIS, EYE COMFORTABLE PER PT. AC CLEAR" WAS REPORTED FOR STATUS OF THE EY…	Lens Exchange	Resolved
https://www.accessdata.fda.gov/scripts/cdrh/cfdocs/cfMAUDE/Detail.CFM?MDRFOI__ID=11280319&pc=QCB	2023826-2021-00252	2021-01-08 05:00:00	Injury	STAAR SURGICAL COMPANY	2021-02-04 05:00:00	QCB	IMPLANTABLE COLLAMER LENS (ICL)	Off-Label Use; Inadequacy of Device Shape and/or Size; Device Dislodged or Dislocated	Blurred Vision	NA#S-P#NA	NA	1	Event Description: THE REPORTER INDICATED THE SURGEON IMPLANTED A 12.6MM VTICM5_12.6 IMPLANTABLE COLLAMER LENS, -14.00/+1.0/107 (SPHERE/CYLINDER/AXIS), IN THE PATIENTS RIGHTT EYE (OD), ON (B)(6) 2020. THE LENS WAS REPORTED AS HAVING LOW VAULTING, WITH LENS ROTATION AND BLURRED VISION. THE LENS REMAINED IMPLANTED. THE CAUSE OF THE EVENT WAS DO TO THE LENS ROTATION. ADDITIONAL INFORMATION HAS BEEN …	Lens Exchange	Resolved
https://www.accessdata.fda.gov/scripts/cdrh/cfdocs/cfMAUDE/Detail.CFM?MDRFOI__ID=11299007&pc=QCB	2023826-2021-00349	2020-07-31 04:00:00	Injury	STAAR SURGICAL COMPANY	2021-02-08 05:00:00	QCB	IMPLANTABLE COLLAMER LENS (ICL)	Misfocusing; Improper or Incorrect Procedure or Method	Blurred Vision	N/A	NA	1	Event Description: THE REPORTER INDICATED THE SURGEON IMPLANTED A 12.1MM VTICM5_12.1 IMPLANTABLE COLLAMER LENS, -14.0/+1.0/095 (SPHERE/CYLINDER/AXIS) INTO THE PATIENT'S RIGHT EYE (OD) ON (B)(6) 2020. ON (B)(6) 2020 THE LENS WAS EXCHANGED WITH A SAME LENGTH DIFFERENT MODEL LENS DUE TO REFRACTIVE SURPRISE. THE PROBLEM IS RESOLVED. THE CAUSE OF THE EVENT IS REPORTED AS USER ERROR: THE SURGEON SWAPPE…	Lens Exchange	Resolved
https://www.accessdata.fda.gov/scripts/cdrh/cfdocs/cfMAUDE/Detail.CFM?MDRFOI__ID=11310525&pc=QCB	2023826-2021-00253	2020-11-30 05:00:00	Injury	STAAR SURGICAL COMPANY	2021-02-10 05:00:00	QCB	IMPLANTABLE COLLAMER LENS (ICL)	Misfocusing	Blurred Vision	N/A	NA	1	Event Description: THE REPORTER INDICATED THE SURGEON IMPLANTED A 12.6MM VTICMO12.6 IMPLANTABLE COLLAMER LENS, -09.00/+1.5/176 (SPHERE/CYLINDER/AXIS), IN THE PATIENTS LEFT EYE (OS), ON (B)(6) 2019. THE LENS WAS EXPLANTED ON (B)(6) 2020 DUE TO PATIENT COMPLAINED OF BLURRED VISION, THE PATIENT IS AMBLYOPIA AND FELT UNSATISFACTION ABOUT FAR. THE PROBLEM WAS RESOLVED. THE SURGEON DOES NOT PLAN TO IMP…	Lens Extraction	Resolved
https://www.accessdata.fda.gov/scripts/cdrh/cfdocs/cfMAUDE/Detail.CFM?MDRFOI__ID=11342672&pc=QCB	2023826-2021-00436	2020-12-31 05:00:00	Injury	STAAR SURGICAL COMPANY	2021-02-18 05:00:00	QCB	IMPLANTABLE COLLAMER LENS (ICL)	Misfocusing; Off-Label Use	Blurred Vision	NA	NA	1	Event Description: THE REPORTER INDICATED THAT A 12.1MM, VTICMO12.1, -7.0/1.0/95 (SPHERE/CYLINDER/AXIS), IMPLANTABLE COLLAMER LENS WAS IMPLANTED INTO THE PATIENTS RIGHT EYE (OD) ON (B)(6) 2020. ON (B)(6) 2020 THE LENS WAS EXPLANTED DUE TO REFRACTIVE SURPRISE. THIS EXPLANT RESOLVED THE PROBLEM, THE REPORTER STATED " THE PATIENT HAS RECOVERED HIS PREOPERATIVE VISION AND NO DECISION HAS BEEN MADE TO…	Lens Extraction	Resolved
https://www.accessdata.fda.gov/scripts/cdrh/cfdocs/cfMAUDE/Detail.CFM?MDRFOI__ID=11352786&pc=QCB	2023826-2021-00493	2019-09-05 04:00:00	Injury	STAAR SURGICAL COMPANY	2021-02-19 05:00:00	QCB	IMPLANTABLE COLLAMER LENS (ICL)	Misfocusing; Off-Label Use	Blurred Vision	NA	NA	1	Event Description: THE REPORTER INDICATED THAT A 13.2MM, VTICMO13.2, -14.0/1.0/081 (SPHERE/CYLINDER/AXIS), IMPLANTABLE COLLAMER LENS WAS IMPLANTED INTO THE PATIENTS LEFT EYE (OS) ON (B)(6) 2019. ON (B)(6) 2019 THE LENS WAS EXCHANGED FOR A DIFFERENT DIOPTER LENS DUE TO REFRACTIVE SURPRISE. THIS EXCHANGE RESOLVED THE PROBLEM. CAUSE OF EVENT WAS REPORTED AS UNKNOWN. Manufacturer Narrative: H3 - DEVI…	Lens Exchange	Resolved
https://www.accessdata.fda.gov/scripts/cdrh/cfdocs/cfMAUDE/Detail.CFM?MDRFOI__ID=11358972&pc=QCB	2023826-2021-00498	2021-01-16	Malfunction	STAAR SURGICAL COMPANY	2021-02-22	QCB	IMPLANTABLE COLLAMER LENS (ICL)	Misfocusing	Blurred Vision	N/A	NA	1	Event Description: THE REPORTER INDICATED THAT A 12.6MM, VTICMO12.6, -15.00/5.0/077 (SPHERE/CYLINDER/AXIS), IMPLANTABLE COLLAMER LENS WAS IMPLANTED INTO THE PATIENT'S LEFT EYE (OS) ON (B)(6) 2021. REFRACTIVE SURPRISE AND BLURRED VISION WAS OBSERVED, THE LENS REMAINS IMPLANTED. ADDITIONAL INFORMATION HAS BEEN REQUESTED BUT NONE HAS BEEN FORTHCOMING. IF ADDITIONAL INFORMATION IS RECEIVED A SUPPLEME…	Lens Retention	Unknown
https://www.accessdata.fda.gov/scripts/cdrh/cfdocs/cfMAUDE/Detail.CFM?MDRFOI__ID=11366596&pc=QCB	2023826-2021-00486	NA	Malfunction	STAAR SURGICAL COMPANY	2021-02-23	QCB	IMPLANTABLE COLLAMER LENS (ICL)	Misfocusing	Blurred Vision	N/A	NA	1	Event Description: THE REPORTER INDICATED THAT A 12.6MM VTICMO12.6, -11.0/+1.0/079 (SPHERE/CYLINDER/AXIS), IMPLANTABLE COLLAMER LENS WAS IMPLANTED INTO THE PATIENT'S LEFT EYE (OS) ON (B)(6) 2020. THE SURGEON REPORTSBLURRED VISION. REPORTEDLY, THE LENS REMAINS IMPLANTED. Manufacturer Narrative: PMA/510(K): THIS PRODUCT IS MANUFACTURED IN THE U.S. BUT NOT MARKETED IN THE U.S. LENS WORK ORDER SEARCH…	Lens Retention	Unknown
https://www.accessdata.fda.gov/scripts/cdrh/cfdocs/cfMAUDE/Detail.CFM?MDRFOI__ID=11366580&pc=QCB	2023826-2021-00482	2021-01-08 05:00:00	Injury	STAAR SURGICAL COMPANY	2021-02-23 05:00:00	QCB	IMPLANTABLE COLLAMER LENS (ICL)	Misfocusing	Blurred Vision	N/A	NA	1	Event Description: THE REPORTER INDICATED THE SURGEON IMPLANTED A 12.1MM VTICM5_12.1 IMPLANTABLE COLLAMER LENS, -7.5/+1.0/089 (SPHERE/CYLINDER/AXIS) INTO THE PATIENT'S LEFT EYE (OS) ON (B)(6) 2021. ON (B)(6) 2021 THE LENS WAS EXCHANGED WITH A SAME LENGTH DIFFERENT SPHERE/CYLINDER/AXIS LENS DUE TO REFRACTIVE SURPRISE. THE PROBLEM IS RESOLVED. THE CAUSE OF THE EVENT IS REPORTED AS UNKNOWN. Manufact…	Lens Exchange	Resolved
https://www.accessdata.fda.gov/scripts/cdrh/cfdocs/cfMAUDE/Detail.CFM?MDRFOI__ID=11372200&pc=QCB	2023826-2021-00441	2020-02-02	Malfunction	STAAR SURGICAL COMPANY	2021-02-24	QCB	IMPLANTABLE COLLAMER LENS (ICL)	Misfocusing; Improper or Incorrect Procedure or Method	Blurred Vision	N/A	NA	1	Event Description: THE REPORTER INDICATED THAT A 13.2MM, VTICMO13.2, -15.00/1.0/081 (SPHERE/CYLINDER/AXIS), IMPLANTABLE COLLAMER LENS WAS IMPLANTED INTO THE PATIENT'S LEFT EYE (OS) ON (B)(6) 2020. REFRACTIVE SURPRISE WAS OBSERVED, THE LENS REMAINS IMPLANTED. CAUSE OF THE EVENT IS REPORTED AS USER ERROR. "USED WRONG REFRACTION FOR THE CALCULATION." .REPORTEDLY, EXCHANGE IS PLANNED. ADDITIONAL INFO…	Lens Retention	Unknown
https://www.accessdata.fda.gov/scripts/cdrh/cfdocs/cfMAUDE/Detail.CFM?MDRFOI__ID=11400355&pc=QCB	2023826-2021-00526	2020-12-12	Malfunction	STAAR SURGICAL COMPANY	2021-03-02	QCB	IMPLANTABLE COLLAMER LENS (ICL)	Misfocusing; Off-Label Use	Blurred Vision	N/A	NA	1	Event Description: THE REPORTER INDICATED THAT A 12.6MM VTICMO12.6, -11.5/+1.0/018 (SPHERE/CYLINDER/AXIS) IMPLANTABLE COLLAMER LENS WAS IMPLANTED INTO THE PATIENT'S LEFT EYE (OS) ON (B)(6) 2020. THE SURGEON REPORTS REFRACTIVE SURPRISE. REPORTEDLY, THE LENS REMAINS IMPLANTED. Manufacturer Narrative: THIS PRODUCT IS MANUFACTURED IN THE U.S. BUT NOT MARKETED IN THE U.S. (B)(4).	Lens Retention	Unknown
https://www.accessdata.fda.gov/scripts/cdrh/cfdocs/cfMAUDE/Detail.CFM?MDRFOI__ID=11400354&pc=QCB	2023826-2021-00527	2020-11-01 04:00:00	Injury	STAAR SURGICAL COMPANY	2021-03-02 05:00:00	QCB	IMPLANTABLE COLLAMER LENS (ICL)	Misfocusing; Off-Label Use	Blurred Vision	N/A	NA	1	Event Description: THE REPORTER INDICATED THE SURGEON IMPLANTED A 12.6MM VTICMO12.6 IMPLANTABLE COLLAMER LENS, -12.0/+2.0/115 (SPHERE/CYLINDER/AXIS) INTO THE PATIENT'S RIGHT EYE (OD) ON (B)(6) 2020. ON (B)(6) 2021, THE LENS WAS EXCHANGED WITH A SAME LENGTH, DIFFERENT SPHERE/CYLINDER/AXIS LENS DUE TO REFRACTIVE SURPRISE. THE PROBLEM IS RESOLVED. THE CAUSE OF THE EVENT IS REPORTED AS UNKNOWN. Manuf…	Lens Exchange	Resolved
https://www.accessdata.fda.gov/scripts/cdrh/cfdocs/cfMAUDE/Detail.CFM?MDRFOI__ID=11423056&pc=QCB	2023826-2021-00573	2020-09-03 04:00:00	Injury	STAAR SURGICAL COMPANY	2021-03-05 05:00:00	QCB	IMPLANTABLE COLLAMER LENS (ICL)	Misfocusing	Blurred Vision	NA	NA	1	Event Description: THE REPORTER INDICATED THAT A 13.2MM, VTICM5_13.2, -14.00/2.0/031 (SPHERE/CYLINDER/AXIS), IMPLANTABLE COLLAMER LENS WAS IMPLANTED INTO THE PATIENTS RIGHT EYE (OD) ON (B)(6) 2020. REFRACTIVE SURPRISE WAS OBSERVED, LENS REMAINS IMPLANTED. "NORMAL" WAS REPORTED FOR STATUS OF THE EYE (SIGNS/SYMPTOMS) ADDITIONAL INFORMATION HAS BEEN REQUESTED BUT NONE HAS BEEN FORTHCOMING. IF ADDITI…	Lens Exchange	Resolved
https://www.accessdata.fda.gov/scripts/cdrh/cfdocs/cfMAUDE/Detail.CFM?MDRFOI__ID=11453117&pc=QCB	2023826-2021-00601	2020-03-22 04:00:00	Injury	STAAR SURGICAL COMPANY	2021-03-10 05:00:00	QCB	IMPLANTABLE COLLAMER LENS (ICL)	Off-Label Use; Device Dislodged or Dislocated	Blurred Vision	N/A	NA	1	Event Description: THE REPORTER INDICATED THAT A 12.1MM, VTICMO12.1, -13.00/1.5/093 (SPHERE/CYLINDER/AXIS), IMPLANTABLE COLLAMER LENS WAS IMPLANTED INTO THE PATIENT'S LEFT EYE (OS) ON (B)(6) 2020. LENS ROTATION NOT ASSOCIATED TO A LOW VAULT WAS OBSERVED. ON (B)(6) 2020 THE LENS WAS EXCHANGED FOR A SAME LENGTH LENS, THIS RESOLVED THE PROBLEM. CAUSE OF THE EVENT IS REPORTED AS UNKNOWN. REPORTEDLY, …	Lens Exchange	Resolved
https://www.accessdata.fda.gov/scripts/cdrh/cfdocs/cfMAUDE/Detail.CFM?MDRFOI__ID=11467987&pc=QCB	2023826-2021-00632	2021-02-23 05:00:00	Injury	STAAR SURGICAL COMPANY	2021-03-11 05:00:00	QCB	IMPLANTABLE COLLAMER LENS (ICL)	No Apparent Adverse Event	Blurred Vision	NA	NA	1	Event Description: THE REPORTER INDICATED THAT A 13.2MM, VTICMO13.2, -14.50/1.5/092 (SPHERE/CYLINDER/AXIS), IMPLANTABLE COLLAMER LENS WAS IMPLANTED INTO THE PATIENTS LEFT EYE (OS) AS A REPLACEMENT LENS DUE TO ELEVATED IOP WITHOUT PUPIL BLOCK AND ANGLE CLOSURE. "BLURRINESS" WAS REPORTER FOR STATUS OF THE EYE (SIGNS/SYMPTOMS). ADDITIONAL INFORMATION HAS BEEN REQUESTED BUT NONE HAS BEEN FORTHCOMING.…	Lens Repositioning	Resolved
https://www.accessdata.fda.gov/scripts/cdrh/cfdocs/cfMAUDE/Detail.CFM?MDRFOI__ID=11507463&pc=QCB	2023826-2021-00677	2021-02-12 05:00:00	Injury	STAAR SURGICAL COMPANY	2021-03-17 04:00:00	QCB	IMPLANTABLE COLLAMER LENS (ICL)	Misfocusing; Off-Label Use	Blurred Vision	N/A	NA	1	Event Description: THE REPORTER INDICATED THE SURGEON IMPLANTED A 12.6MM VTICM5_12.6 IMPLANTABLE COLLAMER LENS, -11.5/+1.5/092 (SPHERE/CYLINDER/AXIS) INTO THE PATIENT'S LEFT EYE (OS) ON (B)(6) 2020. ON (B)(6)2021 THE LENS WAS EXCHANGED WITH A SAME LENGTH DIFFERENT SPHERE/AXIS LENS DUE TO REFRACTIVE SURPRISE. THE PROBLEM IS RESOLVED. THE CAUSE OF THE EVENT IS REPORTED AS UNKNOWN. Manufacturer Narr…	Lens Retention	Resolved
https://www.accessdata.fda.gov/scripts/cdrh/cfdocs/cfMAUDE/Detail.CFM?MDRFOI__ID=11507471&pc=QCB	2023826-2021-00675	2021-02-12 05:00:00	Injury	STAAR SURGICAL COMPANY	2021-03-17 04:00:00	QCB	IMPLANTABLE COLLAMER LENS (ICL)	Misfocusing; Off-Label Use	Blurred Vision	N/A	NA	1	Event Description: THE REPORTER INDICATED THE SURGEON IMPLANTED A 12.6MM VTICMO12.6 IMPLANTABLE COLLAMER LENS, -15.0/+2.0/090 (SPHERE/CYLINDER/AXIS) INTO THE PATIENT'S RIGHT EYE (OD) ON (B)(6) 2020. ON (B)(6) 2021 THE LENS WAS EXCHANGED WITH A SAME SIZE DIFFERENT SPHERE/CYLINDER/AXIS LENS DUE TO REFRACTIVE SURPRISE. THE PROBLEM IS RESOLVED. THE CAUSE OF THE EVENT IS REPORTED AS UNKNOWN: INITIALLY…	Lens Exchange	Resolved
https://www.accessdata.fda.gov/scripts/cdrh/cfdocs/cfMAUDE/Detail.CFM?MDRFOI__ID=11507474&pc=QCB	2023826-2021-00662	2021-01-14 05:00:00	Injury	STAAR SURGICAL COMPANY	2021-03-17 04:00:00	QCB	IMPLANTABLE COLLAMER LENS	Misfocusing; Off-Label Use; Device Dislodged or Dislocated	Blurred Vision	N/A	NA	1	Event Description: THE REPORTER STATED THAT THE SURGEON IMPLANTED A 13.2MM VTICM5_13.2, -9.5/+6.0/076 (SPHERE/CYLINDER/AXIS) INTO THE PATIENT'S LEFT EYE (OS). THE SURGEON REPORTS REFRACTIVE SURPRISE AND LENS ROTATION. REPORTEDLY, LENS REMAINS IMPLANTED. Manufacturer Narrative: ADDITIONAL INFORMATION: B1-ADVERSE EVENT. B2-REQUIRED INTERVENTION TO PREVENT PERMANENT IMPAIRMENT/DAMAGE (DEVICES) B5- T…	Lens Exchange	Resolved
https://www.accessdata.fda.gov/scripts/cdrh/cfdocs/cfMAUDE/Detail.CFM?MDRFOI__ID=11507487&pc=QCB	2023826-2021-00676	2021-02-12 05:00:00	Injury	STAAR SURGICAL COMPANY	2021-03-17 04:00:00	QCB	IMPLANTABLE COLLAMER LENS (ICL)	Misfocusing; Off-Label Use	Blurred Vision	N/A	NA	1	Event Description: THE REPORTER INDICATED THE SURGEON IMPLANTED A 12.6MM VTICM5_12.6 IMPLANTABLE COLLAMER LENS, -11.5/+1.5/090 (SPHERE/CYLINDER/AXIS) INTO THE PATIENT'S RIGHT EYE (OD) ON (B)(6) 2020. ON (B)(6) 2021 THE LENS WAS EXCHANGED WITH A SAME LENGTH DIFFERENT SPHERE LENS DUE TO REFRACTIVE SURPRISE. THE PROBLEM IS RESOLVED. THE CAUSE OF THE EVENT IS REPORTED AS UNKNOWN. Manufacturer Narrati…	Lens Exchange	Resolved
https://www.accessdata.fda.gov/scripts/cdrh/cfdocs/cfMAUDE/Detail.CFM?MDRFOI__ID=11515292&pc=QCB	2023826-2021-00586	2020-10-21 04:00:00	Injury	STAAR SURGICAL COMPANY	2021-03-18 04:00:00	QCB	IMPLANTABLE COLLAMER LENS (ICL)	Misfocusing	Blurred Vision	N/A	NA	1	Event Description: THE REPORTER INDICATED THAT A 13.2MM, VTICM5_13.2, -9.00/1.0/002 (SPHERE/CYLINDER/AXIS), IMPLANTABLE COLLAMER LENS WAS IMPLANTED INTO THE PATIENT'S RIGHT EYE (OD) ON (B)(6) 2019. REFRACTIVE SURPRISE WAS OBSERVED (B)(6) 2021, THE LENS REMAINS IMPLANTED. ADDITIONAL INFORMATION HAS BEEN REQUESTED BUT NONE HAS BEEN FORTHCOMING. IF ADDITIONAL INFORMATION IS RECEIVED A SUPPLEMENTAL M…	Lens Retention	Resolved
https://www.accessdata.fda.gov/scripts/cdrh/cfdocs/cfMAUDE/Detail.CFM?MDRFOI__ID=11558783&pc=QCB	2023826-2021-00723	2021-01-06 05:00:00	Injury	STAAR SURGICAL COMPANY	2021-03-23 04:00:00	QCB	IMPLANTABLE COLLAMER LENS	Misfocusing; Device Dislodged or Dislocated	Blurred Vision	N/A	NA	1	Event Description: THE REPORTER STATED THAT THE SURGEON IMPLANTED A TORIC IMPLANTABLE COLLAMER LENS INTO THE PATIENT'S LEFT EYE (OS). THE SURGEON REPORTS REFRACTIVE SURPRISE 2 MONTHS POSTOPERATIVELY. ATTEMPTS TO OBTAIN ADDITIONAL INFORMATION HAVE NOT BEEN SUCCESSFUL. Manufacturer Narrative: B1-UPDATED. B5-UPDATED: ON (B)(6) 2021 THE LENS WS REPOSITIONED. THERE IS RESIDUAL REFRACTION AND THE LENS …	Lens Repositioning	Not_Resolved
https://www.accessdata.fda.gov/scripts/cdrh/cfdocs/cfMAUDE/Detail.CFM?MDRFOI__ID=11563257&pc=QCB	2023826-2021-00763	2020-10-21 04:00:00	Injury	STAAR SURGICAL COMPANY	2021-03-24 04:00:00	QCB	IMPLANTABLE COLLAMER LENS (ICL)	Misfocusing	Blurred Vision	N/A	NA	1	Event Description: THE REPORTER INDICATED THAT A 13.2MM, VTICMO 13.2, -04.50/1.0/081 (SPHERE/CYLINDER/AXIS), IMPLANTABLE COLLAMER LENS WAS IMPLANTED INTO THE PATIENT'S LEFT EYE (OS) ON (B)(6) 2020. THE LENS WAS REMOVED AND EXCHANGED FOR A SAME LENGTH, LENS WITH A -11.50/2.0/090 (SPHERE/CYLINDER/AXIS) POWER ON (B)(6) 2020 TO RESOLVE THE PROBLEM. CAUSE OF THE EVENT IS REPORTED AS UNKNOWN. Manufactu…	Lens Exchange	Resolved
https://www.accessdata.fda.gov/scripts/cdrh/cfdocs/cfMAUDE/Detail.CFM?MDRFOI__ID=11563279&pc=QCB	2023826-2021-00753	2021-02-16 05:00:00	Injury	STAAR SURGICAL COMPANY	2021-03-24 04:00:00	QCB	IMPLANTABLE COLLAMER LENS (ICL)	Misfocusing	Blurred Vision	N/A	NA	1	Event Description: THE REPORTER INDICATED THAT A 13.2MM, VTICH13.2, -8.00/2.0/054 (SPHERE/CYLINDER/AXIS), IMPLANTABLE COLLAMER LENS WAS IMPLANTED INTO THE PATIENT'S RIGHT EYE (OD) ON (B)(6) 2020. ON (B)(6) 2021 THE LENS WAS EXCHANGED WITH A SAME SIZE , HIGHER POWER (10.00/2.0/050(SPHERE/CYLINDER/AXIS)) LENS DUE TO REFRACTIVE SURPRISE. THE PROBLEM WAS RESOLVED. REPORTEDLY, "STILL LETTLE EDEMA OF T…	Lens Exchange	Resolved
https://www.accessdata.fda.gov/scripts/cdrh/cfdocs/cfMAUDE/Detail.CFM?MDRFOI__ID=11620609&pc=QCB	2023826-2021-00880	NA	Malfunction	STAAR SURGICAL COMPANY	2021-04-06 04:00:00	QCB	IMPLANTABLE COLLAMER LENS (ICL)	Misfocusing; Off-Label Use	Blurred Vision	N/A	NA	1	Event Description: THE REPORTER INDICATED THAT A 12.6MM, VTICMO12.6, -3.0/+4.5/178 (SPHERE/CYLINDER/AXIS), IMPLANTABLE COLLAMER LENS WAS IMPLANTED INTO THE PATIENT'S RIGHT EYE (OD) ON (B)(6) 2020. REFRACTIVE SUPRISE, RESIDUAL ASTIGMATISM, AND BLURRED VISION WAS REPORTED. THE LENS REMAINS IMPLANTED. THE CAUSE IS REPORTED AS DEVICE: PREOPERATIVE AND POSTOPERATIVE COURSE WAS SMOOTH WITHOUT ANY COMPL…	Lens Retention	Unknown
https://www.accessdata.fda.gov/scripts/cdrh/cfdocs/cfMAUDE/Detail.CFM?MDRFOI__ID=11632409&pc=QCB	2023826-2021-00940	2021-02-16 05:00:00	Malfunction	STAAR SURGICAL COMPANY	2021-04-08 04:00:00	QCB	IMPLANTABLE COLLAMER LENS (ICL)	Inadequacy of Device Shape and/or Size	Blurred Vision	NA	NA	1	Event Description: THE REPORTER INDICATED THAT AN IMPLANTABLE COLLAMER LENS WAS IMPLANTED INTO THE PATIENTS LEFT EYE (OS) IN 2012. ZERO VAULTING AND REFRACTIVE CHANGE OVERTIME WAS REPORTED. LENS REMAINS IMPLANTED. ADDITIONAL INFORMATION HAS BEEN REQUESTED BUT NONE HAS BEEN FORTHCOMING. IF ADDITIONAL INFORMATION IS RECEIVED A SUPPLEMENTAL MEDWATCH REPORT WILL BE SUBMITTED. Manufacturer Narrative: …	Lens Retention	Unknown
https://www.accessdata.fda.gov/scripts/cdrh/cfdocs/cfMAUDE/Detail.CFM?MDRFOI__ID=11654115&pc=QCB	2023826-2021-00960	2021-03-11 05:00:00	Injury	STAAR SURGICAL COMPANY	2021-04-12 04:00:00	QCB	IMPLANTABLE COLLAMER LENS (ICL)	Misfocusing; Inadequacy of Device Shape and/or Size	Blurred Vision	N/A	NA	1	Event Description: THE REPORTER INDICATED THAT A 13.2MM VTICMO13.2, -13.5/+1.5/130 (SPHERE/CYLINDER/AXIS), IMPLANTABLE COLLAMER LENS WAS IMPLANTED INTO THE PATIENTS RIGHT EYE (OD) ON (B)(6) 2015. LOW VAULT AND REFRACTIVE CHANGE OVER TIME WAS REPORTED. REPORTEDLY, THE LENS REMAINS IMPLANTED. Manufacturer Narrative: ADDITIONAL INFORMATION: B5 - IT WAS LATER REPORTED THAT ON (B)(6) 2021 THE LENS WAS…	Lens Exchange	Resolved
https://www.accessdata.fda.gov/scripts/cdrh/cfdocs/cfMAUDE/Detail.CFM?MDRFOI__ID=11676163&pc=QCB	2023826-2021-01056	NA	Injury	STAAR SURGICAL COMPANY	2021-04-15	QCB	IMPLANTABLE COLLAMER LENS (ICL)	Misfocusing; Inadequacy of Device Shape and/or Size; Device Dislodged or Dislocated	Blurred Vision	NA	NA	1	Event Description: THE REPORTER INDICATED THAT A 13.2MM, VTICM5_13.2, -13.00/4.0/79 (SPHERE/CYLINDER/AXIS), IMPLANTABLE COLLAMER LENS WAS IMPLANTED INTO THE PATIENTS LEFT EYE (OS) ON (B)(6) 2021. THE LENS WAS IMPLANTED AS A REPLACEMENT LENS TO CORRECT REFRACTIVE SURPRISE AND LOW VAULT WITH ROTATION BUT THE PROBLEM DID NOT RESOLVE. ON (B)(6) 2021 THE LENS WAS REPOSITIONED, IT WAS REPORTED THAT AFT…	Lens Repositioning	Resolved
https://www.accessdata.fda.gov/scripts/cdrh/cfdocs/cfMAUDE/Detail.CFM?MDRFOI__ID=11676122&pc=QCB	2023826-2021-01055	2020-11-28 05:00:00	Injury	STAAR SURGICAL COMPANY	2021-04-15 04:00:00	QCB	IMPLANTABLE COLLAMER LENS (ICL)	Misfocusing; Inadequacy of Device Shape and/or Size; Device Dislodged or Dislocated	Blurred Vision	NA	NA	1	Event Description: THE REPORTER INDICATED THAT A 12.6MM, VTICM5_12.6, -13.00/4.0/80 (SPHERE/CYLINDER/AXIS), IMPLANTABLE COLLAMER LENS WAS IMPLANTED INTO THE PATIENTS LEFT EYE (OS) ON (B)(6) 2020. REFRACTIVE SURPRISE AND LOW VAULT WITH ROTATION WAS OBSERVED. LENS REPOSITIOING WAS PERFORMED BUT THE PROBLEM DID NOT RESOLVE. ON (B)(6) 2021 THE LENS WAS EXCHANGED FOR A SAME DIOPTER, LONGER LENGTH LENS…	Lens Exchange	Not_Resolved
https://www.accessdata.fda.gov/scripts/cdrh/cfdocs/cfMAUDE/Detail.CFM?MDRFOI__ID=11697123&pc=QCB	2023826-2021-01081	NA	Injury	STAAR SURGICAL COMPANY	2021-04-20 04:00:00	QCB	IMPLANTABLE COLLAMER LENS	Misfocusing	Blurred Vision	N/A	NA	1	Event Description: THE REPORTER STATED THAT THE SURGEON IMPLANTED A 13.7MM VTICM5_13.7, -8.5/+5.5/095 (SPHERE/CYLINDER/AXIS) INTO THE PATIENT'S EYE. THE SURGEON REPORTS REFRACTIVE SURPRISE. REPORTEDLY, LENS REMAINS IMPLANTED. Manufacturer Narrative: B1-UPDATED. B5-UPDATED INFO: THE REPORTER STATES THE "DOCTOR SOLVED THIS CASE ROTATING THE LENS." H6-HEALTH IMPACT CODE UPDATED. INVESTIGATION CODE C…	Lens Repositioning	Resolved
https://www.accessdata.fda.gov/scripts/cdrh/cfdocs/cfMAUDE/Detail.CFM?MDRFOI__ID=11714600&pc=QCB	2023826-2021-01131	2020-11-03 05:00:00	Injury	STAAR SURGICAL COMPANY	2021-04-23 04:00:00	QCB	IMPLANTABLE COLLAMER LENS (ICL)	Misfocusing; Off-Label Use	Blurred Vision	NA	NA	1	Event Description: THE REPORTER INDICATED THAT A 12.6MM, VTICMO12.6, -7.50/2.0/079 9SPHERE/CYLINDER/AXIS), IMPLANTABLE COLLAMER LENS WAS IMPLANTED INTO THE PATIENTS LEFT EYE (OS) ON (B)(6) 2020. ON (B)(6) 2020 THE LENS WAS EXCHANGED FOR A DIFFERENT DIOPTER LENS DUE TO REFRACTIVE SURPRISE AND BLURRED VISION. THIS EXCHANGE RESOLVED THE PROBLEM. IN THE REPORTERS OPINION THE CAUSE OF THIS EVENT WAS U…	Lens Exchange	Resolved
https://www.accessdata.fda.gov/scripts/cdrh/cfdocs/cfMAUDE/Detail.CFM?MDRFOI__ID=11721900&pc=QCB	2023826-2021-01017	2019-05-25	Injury	STAAR SURGICAL COMPANY	2021-04-25	QCB	IMPLANTABLE COLLAMER LENS (ICL)	Device Dislodged or Dislocated	Blurred Vision	N/A	NA	1	Event Description: THE REPORTER INDICATED THAT A 13.2MM, VTICMO13.2, -14.50/3.0/074 (SPHERE/CYLINDER/AXIS), IMPLANTABLE COLLAMER LENS WAS IMPLANTED INTO THE PATIENT'S LEFT EYE (OS) ON (B)(6) 2019. LENS ROTATION NOT ASSOCIATED TO A LOW VAULT WAS OBSERVED. REPORTEDLY, BLURRED VISION AND CHANGE IN THE ASTIGMATISM AXIS WAS OBSERVED. ON (B)(6) 2019 THE LENS WAS EXCHANGED FOR A SAME LENGTH LENS AND , T…	Lens Exchange	Resolved
https://www.accessdata.fda.gov/scripts/cdrh/cfdocs/cfMAUDE/Detail.CFM?MDRFOI__ID=11721910&pc=QCB	2023826-2021-01026	2018-07-29	Injury	STAAR SURGICAL COMPANY	2021-04-25	QCB	IMPLANTABLE COLLAMER LENS (ICL)	Device Dislodged or Dislocated	Blurred Vision	N/A	NA	1	Event Description: THE REPORTER INDICATED THAT A 12.6MM, VTICMO12.6, -18.00/2.0/083 (SPHERE/CYLINDER/AXIS), IMPLANTABLE COLLAMER LENS WAS IMPLANTED INTO THE PATIENT'S LEFT EYE (OS) ON (B)(6) 2018. LENS ROTATION NOT ASSOCIATED TO A LOW VAULT WAS OBSERVED. LENS ROTATED CLOCKWISE 90 DEGREES AFTER SURGERY. BLURRED VISION AND CHANGE IN THE ASTIGMATISM AXIS WERE OBSERVED. ON (B)(6) 2018 THE LENS WAS RE…	Lens Exchange	Resolved
https://www.accessdata.fda.gov/scripts/cdrh/cfdocs/cfMAUDE/Detail.CFM?MDRFOI__ID=11721911&pc=QCB	2023826-2021-01027	2018-07-29	Injury	STAAR SURGICAL COMPANY	2021-04-25	QCB	IMPLANTABLE COLLAMER LENS (ICL)	Device Dislodged or Dislocated	Blurred Vision	N/A	NA	1	Event Description: THE REPORTER INDICATED THAT A 12.6MM, VTICMO12.6, -18.00/3.0/104 (SPHERE/CYLINDER/AXIS), IMPLANTABLE COLLAMER LENS WAS IMPLANTED INTO THE PATIENT'S RIGHT EYE (OD) ON (B)(6) 2018. LENS ROTATION NOT ASSOCIATED TO A LOW VAULT WAS OBSERVED. LENS ROTATED CLOCKWISE 90 DEGREES AFTER SURGERY. BLURRED VISION AND CHANGE IN THE ASTIGMATISM AXIS WERE OBSERVED. ON (B)(6) 2018 THE LENS WAS R…	Lens Exchange	Resolved
https://www.accessdata.fda.gov/scripts/cdrh/cfdocs/cfMAUDE/Detail.CFM?MDRFOI__ID=11721923&pc=QCB	2023826-2021-01045	2021-03-23	Malfunction	STAAR SURGICAL COMPANY	2021-04-25	QCB	IMPLANTABLE COLLAMER LENS (ICL)	Misfocusing	Blurred Vision	N/A	NA	1	Event Description: THE REPORTER INDICATED THAT A 12.6MM, VTICM5_12.6, -11.50/0.5/148 (SPHERE/CYLINDER/AXIS), IMPLANTABLE COLLAMER LENS WAS IMPLANTED INTO THE PATIENT'S RIGHT EYE (OD) ON (B)(6) 2021. REFRACTIVE SURPRISE WAS OBSERVED, THE LENS REMAINS IMPLANTED. CAUSE OF THE EVENT IS REPORTED AS UNKNOWN. ADDITIONAL INFORMATION HAS BEEN REQUESTED BUT NONE HAS BEEN FORTHCOMING. IF ADDITIONAL INFORMAT…	Lens Retention	Unknown
https://www.accessdata.fda.gov/scripts/cdrh/cfdocs/cfMAUDE/Detail.CFM?MDRFOI__ID=11721928&pc=QCB	2023826-2021-01046	2021-03-23	Malfunction	STAAR SURGICAL COMPANY	2021-04-25	QCB	IMPLANTABLE COLLAMER LENS (ICL)	Misfocusing	Blurred Vision	N/A	NA	1	Event Description: THE REPORTER INDICATED THAT A 12.6MM, VTICM5_12.6, -11.50/0.5/176 (SPHERE/CYLINDER/AXIS), IMPLANTABLE COLLAMER LENS WAS IMPLANTED INTO THE PATIENT'S LEFT EYE (OS) ON (B)(6) 2021. REFRACTIVE SURPRISE WAS OBSERVED, THE LENS REMAINS IMPLANTED. CAUSE OF THE EVENT IS REPORTED AS UNKNOWN. ADDITIONAL INFORMATION HAS BEEN REQUESTED BUT NONE HAS BEEN FORTHCOMING. IF ADDITIONAL INFORMATI…	Lens Retention	Unknown
https://www.accessdata.fda.gov/scripts/cdrh/cfdocs/cfMAUDE/Detail.CFM?MDRFOI__ID=11721885&pc=QCB	2023826-2021-01004	2020-08-11 04:00:00	Injury	STAAR SURGICAL COMPANY	2021-04-25 04:00:00	QCB	IMPLANTABLE COLLAMER LENS (ICL)	Misfocusing	Blurred Vision	N/A	NA	1	Event Description: THE REPORTER INDICATED THAT A 13.2MM, VTICMO13.2, -11.50/1.0/084 (SPHERE/CYLINDER/AXIS), IMPLANTABLE COLLAMER LENS WAS IMPLANTED INTO THE PATIENT'S RIGHT EYE (OD) ON (B)(6) 2020. ON (B)(6) 2020 THE LENS WAS EXCHANGED WITH A SAME SIZE , HIGHER POWER (SPHERE/CYLINDER/AXIS) LENS DUE TO REFRACTIVE SURPRISE. THE PROBLEM WAS RESOLVED. Manufacturer Narrative: ADDITIONAL INFORMATION: H…	Lens Exchange	Resolved
https://www.accessdata.fda.gov/scripts/cdrh/cfdocs/cfMAUDE/Detail.CFM?MDRFOI__ID=11721890&pc=QCB	2023826-2021-01008	2021-03-24 04:00:00	Malfunction	STAAR SURGICAL COMPANY	2021-04-25 04:00:00	QCB	IMPLANTABLE COLLAMER LENS (ICL)	Misfocusing	Blurred Vision	N/A	NA	1	Event Description: THE REPORTER INDICATED THAT THE SURGEON IMPLANTED A 13.2MM VTICMO13.2, -10.50/6.0/123 (SPHERE/CYLINDER/AXIS), IMPLANTABLE COLLAMER LENS INTO THE PATIENT'S RIGHT EYE (OD) ON (B)(6) 2018. REPORTEDLY, "PATIENT IS NOT HAPPY WITH VISION." LENS REMAINS IMPLANTED. ADDITIONAL INFORMATION HAS BEEN REQUESTED BUT NONE HAS BEEN FORTHCOMING. IF ADDITIONAL INFORMATION IS RECEIVED A SUPPLEMEN…	Lens Retention	Unknown
https://www.accessdata.fda.gov/scripts/cdrh/cfdocs/cfMAUDE/Detail.CFM?MDRFOI__ID=11721908&pc=QCB	2023826-2021-01024	2018-05-28 04:00:00	Injury	STAAR SURGICAL COMPANY	2021-04-25 04:00:00	QCB	IMPLANTABLE COLLAMER LENS (ICL)	Misfocusing; Adverse Event Without Identified Device or Use Problem	Blurred Vision	N/A	NA	1	Event Description: THE REPORTER INDICATED THAT THE SURGEON IMPLANTED A 12.6MM VTICMO12.6, -12.00/2.0/096 (SPHERE/CYLINDER/AXIS), IMPLANTABLE COLLAMER LENS INTO THE PATIENT'S RIGHT EYE (OD) IN (B)(6) 2017. LEN OPACITY (NS) WAS OBSERVED ON (B)(6) 2018. REFRACTIVE SURPRISE WAS OBSEVERED. ON (B)(6) 2018 THE LENS WAS EXCHANGED WITH A SAME SIZE, DIFFERENT POWER (SPHERE/CYLINDER/AXIS) LENS. THIS RESOLVE…	Lens Exchange	Resolved
https://www.accessdata.fda.gov/scripts/cdrh/cfdocs/cfMAUDE/Detail.CFM?MDRFOI__ID=11721919&pc=QCB	2023826-2021-01033	2020-07-17 04:00:00	Injury	STAAR SURGICAL COMPANY	2021-04-25 04:00:00	QCB	IMPLANTABLE COLLAMER LENS (ICL)	Misfocusing	Blurred Vision	N/A	NA	1	Event Description: THE REPORTER INDICATED THAT A 12.6MM, VTICM5_12.6, -7.00/1.5/119 (SPHERE/CYLINDER/AXIS), IMPLANTABLE COLLAMER LENS WAS IMPLANTED INTO THE PATIENT'S LEFT EYE (OS) ON (B)(6) 2020. ON (B)(6) 2020 THE LENS WAS EXCHANGED WITH A SAME SIZE, DIFFERENT POWER (SPHERE/CYLINDER/AXIS) LENS DUE TO REFRACTIVE SURPRISE. THE PROBLEM WAS RESOLVED. CAUSE OF THE EVENT IS REPORTED AS UNKNOWN. REPOR…	Lens Exchange	Resolved
https://www.accessdata.fda.gov/scripts/cdrh/cfdocs/cfMAUDE/Detail.CFM?MDRFOI__ID=11729939&pc=QCB	2023826-2021-01238	2020-08-20 04:00:00	Injury	STAAR SURGICAL COMPANY	2021-04-26 04:00:00	QCB	IMPLANTABLE COLLAMER LENS (ICL)	Misfocusing	Blurred Vision	NA	NA	1	Event Description: THE REPORTER INDICATED THAT A 12.6MM, VTICMO12.6, -13.0/1.0/114 (SPHERE/CYLINDER/AXIS), IMPLANTABLE COLLAMER LENS WAS IMPLANTED INTO THE PATIENTS RIGHT EYE (OD) ON (B)(6) 2020. ON (B)(6) 2020 THE LENS WAS EXCHANGED FOR A DIFFERENT DIOPTER LENS DUE TO REFRACTIVE SURPRISE AND BLURRED VISION. THIS EXCHANGE RESOLVED THE PROBLEM. CAUSE OF THE EVENT WAS REPORTER AS UNKNOWN. Manufactu…	Lens Exchange	Resolved
https://www.accessdata.fda.gov/scripts/cdrh/cfdocs/cfMAUDE/Detail.CFM?MDRFOI__ID=11734843&pc=QCB	2023826-2021-01180	2020-09-25 04:00:00	Injury	STAAR SURGICAL COMPANY	2021-04-27 04:00:00	QCB	IMPLANTABLE COLLAMER LENS (ICL)	Misfocusing	Blurred Vision	N/A	NA	1	Event Description: THE REPORTER INDICATED THE SURGEON IMPLANTED A 12.6MM VTICM5_12.6 IMPLANTABLE COLLAMER LENS, -8.5/+5.0/085 (SPHERE/CYLINDER/AXIS) INTO THE PATIENT'S RIGHT EYE (OD) ON (B)(6) 2020. ON (B)(6) 2020, THE LENS WAS REPOSITIONED DUE TO REFRACTIVE SURPRISE. REPORTEDLY, THE LENS REMAINS IMPLANTED. Manufacturer Narrative: B5: LOW VAULT WAS ALSO OBSERVED. THE LENS WAS EXCHANGED FOR LONGER…	Lens Exchange	Resolved
https://www.accessdata.fda.gov/scripts/cdrh/cfdocs/cfMAUDE/Detail.CFM?MDRFOI__ID=11734852&pc=QCB	2023826-2021-01179	2018-01-01 05:00:00	Malfunction	STAAR SURGICAL COMPANY	2021-04-27 04:00:00	QCB	IMPLANTABLE COLLAMER LENS	Misfocusing; Device Dislodged or Dislocated	Blurred Vision	N/A	NA	1	Event Description: THE REPORTER STATED THAT THE SURGEON IMPLANTED A TORIC IMPLANTABLE COLLAMER LENS INTO THE PATIENT'S LEFT EYE (OS). THE SURGEON REPORTS RESIDUAL ASTIGMATISM AND LENS ROTATION. ATTEMPTS TO OBTAIN ADDITIONAL INFORMATION HAVE NOT BEEN SUCCESSFUL. Manufacturer Narrative: B5- ADDITIONAL INFO: A 12.5MM TICM12.5, -7.5/+2.0/164 (SPHERE/CYLINDER/AXIS) LENS WAS IMPLANTED INTO THE PATIENT'…	Lens Retention	Unknown
https://www.accessdata.fda.gov/scripts/cdrh/cfdocs/cfMAUDE/Detail.CFM?MDRFOI__ID=11750600&pc=QCB	2023826-2021-01297	2019-02-21	Injury	STAAR SURGICAL COMPANY	2021-04-29	QCB	IMPLANTABLE COLLAMER LENS (ICL)	Device Dislodged or Dislocated	Blurred Vision	NA	NA	1	Event Description: THE REPORTER INDICATED THE SURGEON IMPLANTED A 12.6MM VTICMO12.6 IMPLANTABLE COLLAMER LENS, -05.50/+1.0/007 (SPHERE/CYLINDER/AXIS), IN THE PATIENTS LEFT EYE (OS), ON (B)(6) 2018. THE LENS WAS EXPLANTED ON (B)(6) 2019 DUE TO LENS ROTATION NOT ASSOCIATED TO A LOW VAULT AND THE PATIENT COMPLAINED OF BLURRED VISION. THE LENS WAS REPOSITIONED . THE LENS WAS EXCHANGED FOR ANOTHER SAM…	Lens Exchange	Resolved
https://www.accessdata.fda.gov/scripts/cdrh/cfdocs/cfMAUDE/Detail.CFM?MDRFOI__ID=11750604&pc=QCB	2023826-2021-01298	2019-01-14	Injury	STAAR SURGICAL COMPANY	2021-04-29	QCB	IMPLANTABLE COLLAMER LENS (ICL)	Device Dislodged or Dislocated	Blurred Vision	NA	NA	1	Event Description: THE REPORTER INDICATED THE SURGEON IMPLANTED A 12.6MM VTICMO12.6 IMPLANTABLE COLLAMER LENS, -11.50/+1.0/115 (SPHERE/CYLINDER/AXIS), IN THE PATIENTS RIGHT EYE (OD), ON (B)(6) 2018. THE LENS WAS EXPLANTED ON (B)(6) 2019 DUE TO LENS ROTATION NOT ASSOCIATED TO A LOW VAULT AND THE PATIENT COMPLAINED OF BLURRED VISION. THE LENS WAS REPOSITIONED. THE LENS WAS EXCHANGED FOR ANOTHER SAM…	Lens Exchange	Resolved
https://www.accessdata.fda.gov/scripts/cdrh/cfdocs/cfMAUDE/Detail.CFM?MDRFOI__ID=11751162&pc=QCB	2023826-2021-01282	2018-04-22	Injury	STAAR SURGICAL COMPANY	2021-04-30	QCB	IMPLANTABLE COLLAMER LENS (ICL)	Misfocusing; Off-Label Use	Blurred Vision	NA	NA	1	Event Description: THE REPORTER INDICATED THAT A 12.6MM, VTICMO12.6, -6.0/2.5/087 (SPHERE/CYLINDER/AXIS), IMPLANTABLE COLLAMER LENS WAS IMPLANTED INTO THE PATIENTS LEFT EYE (OS) ON (B)(6) 2017. ON (B)(6) 2019 THE LENS WAS EXCHANGED FOR A DIFFERENT DIOPTER LENS DUE TO REFRACTIVE SURPRISE. THIS EXCHANGE RESOLVED THE PROBLEM. CAUSE OF EVENT WAS REPORTER AS UNKNOWN. Manufacturer Narrative: WEIGHT: UN…	Lens Exchange	Resolved
https://www.accessdata.fda.gov/scripts/cdrh/cfdocs/cfMAUDE/Detail.CFM?MDRFOI__ID=11779017&pc=QCB	2023826-2021-01329	2021-04-15 04:00:00	Injury	STAAR SURGICAL COMPANY	2021-05-05 04:00:00	QCB	IMPLANTABLE COLLAMER LENS (ICL)	Misfocusing; Device Dislodged or Dislocated	Blurred Vision	N/A	NA	1	Event Description: THE REPORTER INDICATED THAT A 13.2MM, VTICM5_13.2, -8.50/2.5/097 (SPHERE/CYLINDER/AXIS), IMPLANTABLE COLLAMER LENS WAS IMPLANTED INTO THE PATIENT'S RIGHT EYE (OD) ON (B)(6) 2021. REFRACTIVE SURPRISE WAS OBSERVED, THE LENS REMAINS IMPLANTED. ADDITIONAL INFORMATION HAS BEEN REQUESTED BUT NONE HAS BEEN FORTHCOMING. IF ADDITIONAL INFORMATION IS RECEIVED A SUPPLEMENTAL MEDWATCH REPO…	Lens Exchange	Resolved
https://www.accessdata.fda.gov/scripts/cdrh/cfdocs/cfMAUDE/Detail.CFM?MDRFOI__ID=11779026&pc=QCB	2023826-2021-01330	2021-04-15 04:00:00	Injury	STAAR SURGICAL COMPANY	2021-05-05 04:00:00	QCB	IMPLANTABLE COLLAMER LENS (ICL)	Misfocusing; Device Dislodged or Dislocated	Blurred Vision	N/A	NA	1	Event Description: THE REPORTER INDICATED THAT A 13.2MM, VTICM5_13.2, -8.00/2.5/091 (SPHERE/CYLINDER/AXIS), IMPLANTABLE COLLAMER LENS WAS IMPLANTED INTO THE PATIENT'S LEFT EYE (OS) ON (B)(6) 2021. LENS ROTATION NOT ASSOCIATED TO A LOW VAULT AND REFRACTIVE SURPRISE WAS OBSERVED, THE LENS REMAINS IMPLANTED. ADDITIONAL INFORMATION HAS BEEN REQUESTED BUT NONE HAS BEEN FORTHCOMING. IF ADDITIONAL INFOR…	Lens Exchange	Resolved
https://www.accessdata.fda.gov/scripts/cdrh/cfdocs/cfMAUDE/Detail.CFM?MDRFOI__ID=11787301&pc=QCB	2023826-2021-01387	2021-04-01	Injury	STAAR SURGICAL COMPANY	2021-05-06	QCB	IMPLANTABLE COLLAMER LENS (ICL)	Misfocusing	Blurred Vision	NA	NA	1	Event Description: THE REPORTER INDICATED THAT A 13.2MM, VTICM5_13.2, -11.00/0.5/063 (SPHERE/CYLINDER/AXIS), IMPLANTABLE COLLAMER LENS WAS IMPLANTED INTO THE PATIENTS RIGHT EYE (OD) ON (B)(6) 2020. THE PATIENT EXPERIENCED REFRACTIVE SURPRISE. LENS REMAINS IMPLANTED. SECONDARY INTERVENTION/ ADDITIONAL TREATMENT HAS NOT BEEN PERFORMED OR DECIDED UPON. FOR STATUS OF THE EYE " PATIENT CANNOT READ ANY…	Lens Retention	Unknown
https://www.accessdata.fda.gov/scripts/cdrh/cfdocs/cfMAUDE/Detail.CFM?MDRFOI__ID=11781988&pc=QCB	2023826-2021-01384	2021-03-22 04:00:00	Injury	STAAR SURGICAL COMPANY	2021-05-06 04:00:00	QCB	IMPLANTABLE COLLAMER LENS (ICL)	Misfocusing; Adverse Event Without Identified Device or Use Problem	Blurred Vision	NA	NA	1	Event Description: THE REPORTER INDICATED THAT A 13.2MM, VTICMO13.2, -18.0/4.0/155 (SPHERE/CYLINDER/AXIS), IMPLANTABLE COLLAMER LENS WAS IMPLANTD INTO THE PATIENTS RIGHT EYE (OD) ON (B)(6) 2020. "SIGNIFICANT REFRACTIVE SURPRISE AFTER RE ICL IMPLANTATION" WAS REPORTED. LENS REMAINS IMPLANTED. IF ADDITIONAL INFORMATION IS RECEIVED A SUPPLEMENTAL MEDWATCH REPORT WILL BE SUBMITTED. Manufacturer Narra…	Lens Exchange	Unknown
https://www.accessdata.fda.gov/scripts/cdrh/cfdocs/cfMAUDE/Detail.CFM?MDRFOI__ID=11788224&pc=QCB	2023826-2021-01349	2021-01-28 05:00:00	Injury	STAAR SURGICAL COMPANY	2021-05-06 04:00:00	QCB	IMPLANTABLE COLLAMER LENS (ICL)	Misfocusing; Off-Label Use	Blurred Vision	N/A	NA	1	Event Description: THE REPORTER INDICATED THE SURGEON IMPLANTED A 12.1MM VTICM5_12.1 IMPLANTABLE COLLAMER LENS, -4.0/+1.0/168 (SPHERE/CYLINDER/AXIS) INTO THE PATIENT'S RIGHT EYE (OD) ON (B)(6) -2020. ON (B)(6) -2021 THE LENS WAS EXCHANGED WITH A LONGER LENGTH LENS DUE TO REFRACTIVE SURPRISE. THE PROBLEM IS RESOLVED. THE CAUSE OF THE EVENT IS REPORTED AS UNKNOWN. Manufacturer Narrative: H3-DEVICE …	Lens Exchange	Resolved
https://www.accessdata.fda.gov/scripts/cdrh/cfdocs/cfMAUDE/Detail.CFM?MDRFOI__ID=11788229&pc=QCB	2023826-2021-01348	2021-03-04 05:00:00	Injury	STAAR SURGICAL COMPANY	2021-05-06 04:00:00	QCB	IMPLANTABLE COLLAMER LENS (ICL)	Misfocusing	Blurred Vision	N/A	NA	1	Event Description: THE REPORTER INDICATED THE SURGEON IMPLANTED A 12.1MM VTICMO12.1 IMPLANTABLE COLLAMER LENS, -15.0/+1.0/178 (SPHERE/CYLINDER/AXIS) INTO THE PATIENT'S LEFT EYE (OS) ON (B)(6) 2020. ON (B)(6) 2021 THE LENS WAS EXCHANGED WITH A SAME SIZE DIFFERENT MODEL LENS DUE TO REFRACTIVE SURPRISE. THE PROBLEM IS RESOLVED. THE CAUSE OF THE EVENT IS REPORTED AS UNKNOWN. Manufacturer Narrative: H…	Lens Exchange	Resolved
https://www.accessdata.fda.gov/scripts/cdrh/cfdocs/cfMAUDE/Detail.CFM?MDRFOI__ID=11820908&pc=QCB	2023826-2021-01406	2018-07-26	Injury	STAAR SURGICAL COMPANY	2021-05-13	QCB	IMPLANTABLE COLLAMER LENS (ICL)	Misfocusing	Blurred Vision	N/A	NA	1	Event Description: THE REPORTER INDICATED THAT A 12.6MM, VTICMO12.6, -16.50/1.0/097 (SPHERE/CYLINDER/AXIS), IMPLANTABLE COLLAMER LENS WAS IMPLANTED INTO THE PATIENT'S RIGHT EYE (OD) ON (B)(6) 2018. ON (B)(6) 2018, THE LENS WAS EXCHANGED WITH A SAME SIZE, DIFFERENT POWER (SPHERE/CYLINDER/AXIS) LENS DUE TO REFRACTIVE SURPRISE. THE PROBLEM WAS RESOLVED. CAUSE OF THE EVENT IS REPORTED AS UNKNOWN. Man…	Lens Exchange	Resolved
https://www.accessdata.fda.gov/scripts/cdrh/cfdocs/cfMAUDE/Detail.CFM?MDRFOI__ID=11820910&pc=QCB	2023826-2021-01407	2018-07-26	Injury	STAAR SURGICAL COMPANY	2021-05-13	QCB	IMPLANTABLE COLLAMER LENS (ICL)	Misfocusing; Off-Label Use	Blurred Vision	N/A	NA	1	Event Description: THE REPORTER INDICATED THAT A 12.6MM, VTICMO12.6, -14.50/2.0/069 (SPHERE/CYLINDER/AXIS), IMPLANTABLE COLLAMER LENS WAS IMPLANTED INTO THE PATIENT'S LEFT EYE (OS) ON (B)(6) 2018. ON (B)(6) 2018, THE LENS WAS EXCHANGED WITH A SAME SIZE , DIFFERENT POWER (SPHERE/CYLINDER/AXIS) LENS DUE TO REFRACTIVE SURPRISE. THE PROBLEM WAS RESOLVED. CAUSE OF THE EVENT IS REPORTED AS UNKNOWN. Man…	Lens Exchange	Resolved
https://www.accessdata.fda.gov/scripts/cdrh/cfdocs/cfMAUDE/Detail.CFM?MDRFOI__ID=11823183&pc=QCB	2023826-2021-01480	NA	Malfunction	STAAR SURGICAL COMPANY	2021-05-13	QCB	IMPLANTABLE COLLAMER LENS	Misfocusing; Device Dislodged or Dislocated	Blurred Vision	N/A	NA	1	Event Description: THE REPORTER STATED THAT THE SURGEON IMPLANTED A TORIC IMPLANTABLE COLLAMER LENS -13.0/+1.0/173 (SPHERE/CYLINDER/AXIS) INTO THE PATIENT'S LEFT EYE (OS). THE SURGEON REPORTS RESIDUAL ASTIGMATISM AND LENS ROTATION. ATTEMPTS TO OBTAIN ADDITIONAL INFORMATION HAVE NOT BEEN SUCCESSFUL. Manufacturer Narrative: PMA/510(K): THIS PRODUCT IS MANUFACTURED IN THE U.S. BUT NOT MARKETED IN TH…	Unknown	Unknown
https://www.accessdata.fda.gov/scripts/cdrh/cfdocs/cfMAUDE/Detail.CFM?MDRFOI__ID=11823341&pc=QCB	2023826-2021-01455	2020-07-25 04:00:00	Injury	STAAR SURGICAL COMPANY	2021-05-13 04:00:00	QCB	IMPLANTABLE COLLAMER LENS (ICL)	Misfocusing	Blurred Vision	N/A	NA	1	Event Description: THE REPORTER INDICATED THE SURGEON IMPLANTED A 12.6MM VTICMO12.6 IMPLANTABLE COLLAMER LENS, -5.0/+0.5/067 (SPHERE/CYLINDER/AXIS) INTO THE PATIENT'S RIGHT EYE (OD) ON (B)(6) 2020. ON (B)(6)2020, THE LENS WAS EXCHANGED WITH A SAME LENGTH DIFFERENT AXIS LENS DUE TO REFRACTIVE SURPRISE. THE PROBLEM IS RESOLVED. THE CAUSE OF THE EVENT IS REPORTED AS UNKNOWN. Manufacturer Narrative: …	Lens Exchange	Resolved
https://www.accessdata.fda.gov/scripts/cdrh/cfdocs/cfMAUDE/Detail.CFM?MDRFOI__ID=11823528&pc=QCB	2023826-2021-01440	2021-03-19 04:00:00	Injury	STAAR SURGICAL COMPANY	2021-05-13 04:00:00	QCB	IMPLANTABLE COLLAMER LENS (ICL)	Misfocusing; Inadequacy of Device Shape and/or Size	Blurred Vision	NA	NA	1	Event Description: THE REPORTER INDICATED THAT A 13.2MM, VTICMO13.2, -8.00/3.00/79 (SPHERE/CYLINDER/AXIS), IMPLANTABLE COLLAMER LENS, WAS IMPLANTED INTO THE PATIENTS LEFT EYE (OS) ON (B)(6) 2021. LOW VAULT AND REFRACTIVE SURPRISE WAS OBSERVED, LENS REMAINS IMPLANTED. CAUSE OF EVENT WA REPORTED TO BE UNKNOWN, THE REPORTER STATED "IN DR. OPINION MUST HAVE A MISTAKE ABOUT ASTIGMATISM. THE MANIFEST R…	Lens Exchange	Resolved
https://www.accessdata.fda.gov/scripts/cdrh/cfdocs/cfMAUDE/Detail.CFM?MDRFOI__ID=11823603&pc=QCB	2023826-2021-01441	2020-10-05 04:00:00	Injury	STAAR SURGICAL COMPANY	2021-05-13 04:00:00	QCB	IMPLANTABLE COLLAMER LENS (ICL)	Misfocusing; Inadequacy of Device Shape and/or Size; Device Dislodged or Dislocated	Blurred Vision	P990013	NA	1	Event Description: IT WAS REPORTED THAT A 12.6 MM, TMICL12.6, -9.00/3.00/067(SPHERE/CYLINDER/AXIS), IMPLANTABLE COLLAMER LENS WAS IMPLANTED INTO THE PATIENTS LEFT EYE (OS) ON (B)(6) 2019. ON (B)(6) 2020 LENS REPOSITIONING WAS PERFORMED DUE TO LENS ROTATION (TORIC ICL CONTINUED TO ROTATE) AND BLURRED VISION. ON (B)(6) 2021 THE LENS WAS EXCHANGED FOR A LONGER LENGTH LENS AND THE PROBLEM RESOLVED. M…	Lens Exchange	Resolved
https://www.accessdata.fda.gov/scripts/cdrh/cfdocs/cfMAUDE/Detail.CFM?MDRFOI__ID=11829659&pc=QCB	2023826-2021-01538	2021-02-08 05:00:00	Injury	STAAR SURGICAL COMPANY	2021-05-15 04:00:00	QCB	IMPLANTABLE COLLAMER LENS (ICL)	No Apparent Adverse Event	Blurred Vision	NA	NA	1	Event Description: THE REPORTER INDICATED THAT A 13.2MM, VTICMO13.2, -15.5/2.5/093 (SPHERE/CYLINDER/AXIS), IMPLANTABLE COLLAMER LENS WAS IMPLANTED INTO THE PATIENTS RIGHT EYE (OD) AS A REPLACEMENT LENS DUE TO ELEVATED IOP WITHOUT PUPIL BLOCK AND ANGLE CLOSURE. PER UPDATED INFORMATION PATIENT HAS LEFT OVER RX OF -0.25 -0.50X026. PUPIL IS REACTING IOP 23MMHG. IF ADDITIONAL INFORMATION IS RECEIVED A…	Unknown	Resolved
https://www.accessdata.fda.gov/scripts/cdrh/cfdocs/cfMAUDE/Detail.CFM?MDRFOI__ID=11839592&pc=QCB	2023826-2021-01558	NA	Malfunction	STAAR SURGICAL COMPANY	2021-05-18	QCB	IMPLANTABLE COLLAMER LENS (ICL)	Misfocusing	Blurred Vision	NA	NA	1	Event Description: THE REPORTER INDICATED THAT A VTICM5_12.6MM, -4.50/+4/71 (SPHERE/CYLINDER/AXIS), IMPLANTABLE COLLAMER LENS WAS IMPLANTED INTO THE PATIENTS LEFT EYE (OS) ON (B)(6) 2021 AND THE PATIENT EXPERIENCED REFRACTIVE SURPRISE. LENS REMAINS IMPLANTED. IF ADDITIONAL INFORMATION IS RECEIVED A SUPPLEMENTAL MEDWATCH REPORT WILL BE SUBMITTED. Manufacturer Narrative: (EXPIRATION DATE): UNK, NO …	Lens Retention	Unknown
https://www.accessdata.fda.gov/scripts/cdrh/cfdocs/cfMAUDE/Detail.CFM?MDRFOI__ID=11839593&pc=QCB	2023826-2021-01557	NA	Malfunction	STAAR SURGICAL COMPANY	2021-05-18	QCB	IMPLANTABLE COLLAMER LENS (ICL)	Misfocusing	Blurred Vision	NA	NA	1	Event Description: THE REPORTER INDICATED THAT A VTICM5_12.6MM, -4.50/+4.5/103 (SPHERE/CYLINDER/AXIS), IMPLANTABLE COLLAMER LENS WAS IMPLANTED INTO THE PATIENTS RIGHT EYE (OD) ON (B)(6) 2021 AND THE PATIENT EXPERIENCED REFRACTIVE SURPRISE. LENS REMAINS IMPLANTED. IF ADDITIONAL INFORMATION IS RECEIVED A SUPPLEMENTAL MEDWATCH REPORT WILL BE SUBMITTED. Manufacturer Narrative: (EXPIRATION DATE): UNK,…	Lens Retention	Unknown
https://www.accessdata.fda.gov/scripts/cdrh/cfdocs/cfMAUDE/Detail.CFM?MDRFOI__ID=11855234&pc=QCB	2023826-2021-01516	2020-08-30 04:00:00	Injury	STAAR SURGICAL COMPANY	2021-05-20 04:00:00	QCB	IMPLANTABLE COLLAMER LENS (ICL)	Misfocusing	Blurred Vision	N/A	NA	1	Event Description: THE REPORTER INDICATED THAT A 12.6MM, VTICMO12.6, -8.50/1.0/082 (SPHERE/CYLINDER/AXIS), IMPLANTABLE COLLAMER LENS WAS IMPLANTED INTO THE PATIENT'S RIGHT EYE (OD) ON (B)(6) 2020. ON (B)(6) 2020 THE LENS WAS EXCHANGED WITH A SAME SIZE , HIGHER POWER (SPHERE/CYLINDER/AXIS) LENS DUE TO REFRACTIVE SURPRISE. THE PROBLEM WAS RESOLVED. CAUSE OF THE EVENT IS REPORTED AS UNKNOWN. Manufac…	Lens Exchange	Resolved
https://www.accessdata.fda.gov/scripts/cdrh/cfdocs/cfMAUDE/Detail.CFM?MDRFOI__ID=11886266&pc=QCB	2023826-2021-01614	2021-04-14 04:00:00	Injury	STAAR SURGICAL COMPANY	2021-05-26 04:00:00	QCB	IMPLANTABLE COLLAMER LENS (ICL)	Misfocusing	Blurred Vision	P030016	NA	1	Event Description: THE REPORTER INDICATED THE SURGEON IMPLANTED A 12.6MM TMICL12.6 IMPLANTABLE COLLAMER LENS, -10.50/+2.5/087 (SPHERE/CYLINDER/AXIS), IN THE PATIENTS RIGHT EYE (OD) ON (B)(6) 2021. THE LENS WILL BE EXPLANTED ON (B)(6) 2021. DUE TO PATIENT EXPERIENCED A REFRACTIVE SURPRISE AND BLURRED VISION. THE LENS WAS EXCHANGED FOR ANOTHER SAME MODEL/LENGTH BUT DIFFERENT DIOPTER LENS AND THE PR…	Lens Exchange	Resolved
https://www.accessdata.fda.gov/scripts/cdrh/cfdocs/cfMAUDE/Detail.CFM?MDRFOI__ID=11891207&pc=QCB	2023826-2021-01699	2021-01-20 05:00:00	Injury	STAAR SURGICAL COMPANY	2021-05-26 04:00:00	QCB	IMPLANTABLE COLLAMER LENS (ICL)	Misfocusing	Blurred Vision	NA	NA	1	Event Description: THE REPORTER INDICATED THAT A 12.6MM ,VTICMO12.6, -10.0/2.0/087 (SPHERE/CYLINDER/AXIS), IMPLANTABLE COLLAMER LENS WAS IMPLANTED INTO THE PATIENTS RIGHT EYE (OD) ON (B)(6) 2020. ON (B)(6) 2021 THE LENS WAS EXCHANGED FOR A DIFFERENT DIOPTER LENS DUE TO REFRACTIVE SURPRISE. THIS EXCHANGED RESOLVED THE PROBLEM. CAUSE OF EVENT WAS REPORTED TO BE UNKNOWN. Manufacturer Narrative: H3: …	Lens Exchange	Resolved
https://www.accessdata.fda.gov/scripts/cdrh/cfdocs/cfMAUDE/Detail.CFM?MDRFOI__ID=11891209&pc=QCB	2023826-2021-01698	2021-01-20 05:00:00	Injury	STAAR SURGICAL COMPANY	2021-05-26 04:00:00	QCB	IMPLANTABLE COLLAMER LENS (ICL)	Misfocusing	Blurred Vision	NA	NA	1	Event Description: THE REPORTER INDICATED THAT A 12.6MM ,VTICMO12.6, -9.5/1.5/87 (SPHERE/CYLINDER/AXIS), IMPLANTABLE COLLAMER LENS WAS IMPLANTED INTO THE PATIENTS LEFT EYE (OS) ON (B)(6) 2020. ON (B)(6) 2021 THE LENS WAS EXCHANGED FOR A DIFFERENT DIOPTER LENS DUE TO REFRACTIVE SURPRISE. THIS EXCHANGED RESOLVED THE PROBLEM. CAUSE OF EVENT WAS REPORTED TO BE UNKNOWN. Manufacturer Narrative: DEVICE …	Lens Exchange	Resolved
https://www.accessdata.fda.gov/scripts/cdrh/cfdocs/cfMAUDE/Detail.CFM?MDRFOI__ID=11899111&pc=QCB	2023826-2021-01682	2020-07-13 04:00:00	Injury	STAAR SURGICAL COMPANY	2021-05-27 04:00:00	QCB	IMPLANTABLE COLLAMER LENS (ICL)	Misfocusing	Blurred Vision	NA	NA	1	Event Description: THE REPORTER INDICATED THAT A 12.6MM ,VTICMO12.6, -15.5/2.5/091 (SPHERE/CYLINDER/AXIS), IMPLANTABLE COLLAMER LENS WAS IMPLANTED INTO THE PATIENTS RIGHT EYE (OD) ON (B)(6) 2020. ON (B)(6) 2021 THE LENS WAS EXCHANGED FOR A DIFFERENT DIOPTER LENS DUE TO REFRACTIVE SURPRISE. THIS EXCHANGED RESOLVED THE PROBLEM. CAUSE OF EVENT WAS REPORTED TO BE UNKNOWN. Manufacturer Narrative: H3- …	Lens Exchange	Resolved
https://www.accessdata.fda.gov/scripts/cdrh/cfdocs/cfMAUDE/Detail.CFM?MDRFOI__ID=11904673&pc=QCB	2023826-2021-01689	2020-12-14 05:00:00	Injury	STAAR SURGICAL COMPANY	2021-05-28 04:00:00	QCB	IMPLANTABLE COLLAMER LENS (ICL)	Misfocusing	Blurred Vision	NA	NA	1	Event Description: THE REPORTER INDICATED THAT A 13.2MM ,VTICMO13.2, -7.0/2.0/94 (SPHERE/CYLINDER/AXIS), IMPLANTABLE COLLAMER LENS WAS IMPLANTED INTO THE PATIENTS RIGHT EYE (OD) ON (B)(6) 2020. ON (B)(6) 2020 THE LENS WAS EXCHANGED FOR A DIFFERENT DIOPTER LENS DUE TO REFRACTIVE SURPRISE. THIS EXCHANGED RESOLVED THE PROBLEM. CAUSE OF EVENT WAS REPORTED TO BE UNKNOWN. Manufacturer Narrative: DEVICE…	Lens Exchange	Resolved
https://www.accessdata.fda.gov/scripts/cdrh/cfdocs/cfMAUDE/Detail.CFM?MDRFOI__ID=11904725&pc=QCB	2023826-2021-01690	2020-11-23 05:00:00	Injury	STAAR SURGICAL COMPANY	2021-05-28 04:00:00	QCB	IMPLANTABLE COLLAMER LENS (ICL)	Misfocusing	Blurred Vision	NA	NA	1	Event Description: THE REPORTER INDICATED THAT A 12.6MM, VTICMO12.6, -7.0/1.0/94 (SPHERE/CYLINDER/AXIS), IMPLANTABLE COLLAMER LENS WAS IMPLANTED INTO THE PATIENTS LEFT EYE (OS) ON (B)(6) 2020. ON (B)(6) 2020 THE LENS WAS EXCHANGED FOR A DIFFERENT DIOPTER LENS DUE TO REFRACTIVE SURPRISE. THIS EXCHANGE RESOLVED THE PROBLEM. CAUSE WAS REPORTER TO BE UNKNOWN. Manufacturer Narrative: DEVICE EVALUATION…	Lens Exchange	Resolved
https://www.accessdata.fda.gov/scripts/cdrh/cfdocs/cfMAUDE/Detail.CFM?MDRFOI__ID=11938949&pc=QCB	2023826-2021-01648	2021-05-10	Injury	STAAR SURGICAL COMPANY	2021-06-04	QCB	IMPLANTABLE COLLAMER LENS (ICL)	Misfocusing	Blurred Vision	N/A	NA	1	Event Description: THE REPORTER INDICATED THAT A 13.2MM, VTICMO13.2, -15.50/5.0/166 (SPHERE/CYLINDER/AXIS), IMPLANTABLE COLLAMER LENS WAS IMPLANTED INTO THE PATIENT'S RIGHT EYE (OD). REFRACTIVE SURPRISE WAS OBSERVED, THE LENS WAS REPOSITIONED ON (B)(6) 2021 AND THIS DID NOT RESOLVE THE PROBLEM. LENS REMAINS IMPLANTED. CAUSE OF THE EVENT IS REPORTED AS UNKNOWN. ADDITIONAL INFORMATION HAS BEEN REQU…	Lens Retention	Unknown
https://www.accessdata.fda.gov/scripts/cdrh/cfdocs/cfMAUDE/Detail.CFM?MDRFOI__ID=11938956&pc=QCB	2023826-2021-01649	2021-05-10	Malfunction	STAAR SURGICAL COMPANY	2021-06-04	QCB	IMPLANTABLE COLLAMER LENS (ICL)	Misfocusing	Blurred Vision	N/A	NA	1	Event Description: THE REPORTER INDICATED THAT A 13.2MM, VTICMO13.2, -12.50/4.0/009 (SPHERE/CYLINDER/AXIS), IMPLANTABLE COLLAMER LENS WAS IMPLANTED INTO THE PATIENT'S LEFT EYE (OS). REFRACTIVE SURPRISE WAS OBSERVED. LENS REMAINS IMPLANTED. CAUSE OF THE EVENT IS REPORTED AS UNKNOWN. ADDITIONAL INFORMATION HAS BEEN REQUESTED BUT NONE HAS BEEN FORTHCOMING. IF ADDITIONAL INFORMATION IS RECEIVED A SUP…	Lens Retention	Unknown
https://www.accessdata.fda.gov/scripts/cdrh/cfdocs/cfMAUDE/Detail.CFM?MDRFOI__ID=11939030&pc=QCB	2023826-2021-01673	2021-05-10	Injury	STAAR SURGICAL COMPANY	2021-06-04	QCB	IMPLANTABLE COLLAMER LENS (ICL)	Misfocusing	Blurred Vision	P030016	NA	1	Event Description: THE REPORTER INDICATED THAT A 12.6MM, TMICL12.6, -11.00/2.0/071 (SPHERE/CYLINDER/AXIS), IMPLANTABLE COLLAMER LENS WAS IMPLANTED INTO THE PATIENT'S LEFT EYE (OS) ON (B)(6) 2021. ON (B)(6) 2021 THE LENS WAS EXCHANGED WITH A SAME SIZE , SIMILARE (SPHERE/CYLINDER/AXIS) LENS DUE TO REFRACTIVE SURPRISE. THE PROBLEM WAS RESOLVED. Manufacturer Narrative: NO SIMILAR COMPLAINT TYPE EVENT…	Lens Exchange	Resolved
https://www.accessdata.fda.gov/scripts/cdrh/cfdocs/cfMAUDE/Detail.CFM?MDRFOI__ID=11938963&pc=QCB	2023826-2021-01658	2020-11-10 05:00:00	Injury	STAAR SURGICAL COMPANY	2021-06-04 04:00:00	QCB	IMPLANTABLE COLLAMER LENS (ICL)	Misfocusing; Off-Label Use; Inadequacy of Device Shape and/or Size	Blurred Vision	N/A	NA	1	Event Description: THE REPORTER INDICATED THAT THE SURGEON IMPLANTED A 12.1MM VTICMO12.1, -9.00/2.0/086 (SPHERE/CYLINDER/AXIS), IMPLANTABLE COLLAMER LENS INTO THE PATIENT'S RIGHT EYE (OD) ON (B)(6) 2020. THE LENS WAS REPLACED WITH A LONGER LENGTH LENS DUE TO REFRACTIVE SURPRISE AND LOW VAULT ON (B)(6) 2021. THIS RESOLVED THE PROBLEM. CAUSE OF THE EVENT IS REPORTED AS UNKNOWN. Manufacturer Narrati…	Lens Exchange	Resolved
https://www.accessdata.fda.gov/scripts/cdrh/cfdocs/cfMAUDE/Detail.CFM?MDRFOI__ID=11938964&pc=QCB	2023826-2021-01657	2021-01-09 05:00:00	Injury	STAAR SURGICAL COMPANY	2021-06-04 04:00:00	QCB	IMPLANTABLE COLLAMER LENS (ICL)	Misfocusing	Blurred Vision	N/A	NA	1	Event Description: THE REPORTER INDICATED THAT A 13.2MM, VTICMO13.2, -5.00/0.05/106 (SPHERE/CYLINDER/AXIS), IMPLANTABLE COLLAMER LENS WAS IMPLANTED INTO THE PATIENT'S RIGHT EYE (OD) ON (B)(6) 2020. ON (B)(6) 2021 THE LENS WAS EXCHANGED WITH A SAME SIZE , SIMILARE (SPHERE/CYLINDER/AXIS) LENS DUE TO REFRACTIVE SURPRISE. THE PROBLEM WAS RESOLVED. CAUSE OF THE EVENT IS REPORTED AS UNKNOWN. Manufactur…	Lens Exchange	Resolved
https://www.accessdata.fda.gov/scripts/cdrh/cfdocs/cfMAUDE/Detail.CFM?MDRFOI__ID=11942673&pc=QCB	2023826-2021-01780	2020-05-11 04:00:00	Injury	STAAR SURGICAL COMPANY	2021-06-04 04:00:00	QCB	IMPLANTABLE COLLAMER LENS (ICL)	Misfocusing	Blurred Vision	N/A	NA	1	Event Description: THE REPORTER INDICATED THE SURGEON IMPLANTED A 12.6MM VTICMO12.6 IMPLANTABLE COLLAMER LENS, -7.0/+1.5/093 (SPHERE/CYLINDER/AXIS) INTO THE PATIENT'S RIGHT EYE (OD) ON (B)(6) 2018. ON (B)(6) 2020, THE LENS WAS EXCHANGED WITH A SAME LENGTH, DIFFERENT SPHERE/CYLINDER/AXIS LENS DUE TO REFRACTIVE SURPRISE. THE PROBLEM IS RESOLVED. THE CAUSE OF THE EVENT IS REPORTED AS UNKNOWN. Manufa…	Lens Exchange	Resolved
https://www.accessdata.fda.gov/scripts/cdrh/cfdocs/cfMAUDE/Detail.CFM?MDRFOI__ID=11942675&pc=QCB	2023826-2021-01778	2021-01-26 05:00:00	Injury	STAAR SURGICAL COMPANY	2021-06-04 04:00:00	QCB	IMPLANTABLE COLLAMER LENS (ICL)	Misfocusing	Blurred Vision	N/A	NA	1	Event Description: THE REPORTER INDICATED THE SURGEON IMPLANTED A 12.6MM VTICMO12.6 IMPLANTABLE COLLAMER LENS, -8.0/+1.0/104 (SPHERE/CYLINDER/AXIS) INTO THE PATIENT'S LEFT EYE (OS) ON (B)(6) 2021. ON (B)(6) 2021 THE LENS WAS EXCHANGED WITH A SAME LENGTH, DIFFERENT SPHERE/AXIS LENS DUE TO REFRACTIVE SURPRISE. THE PROBLEM IS RESOLVED. THE CAUSE OF THE EVENT IS REPORTED AS UNKNOWN. Manufacturer Narr…	Lens Exchange	Resolved
https://www.accessdata.fda.gov/scripts/cdrh/cfdocs/cfMAUDE/Detail.CFM?MDRFOI__ID=11942687&pc=QCB	2023826-2021-01772	2020-11-20 05:00:00	Injury	STAAR SURGICAL COMPANY	2021-06-04 04:00:00	QCB	IMPLANTABLE COLLAMER LENS (ICL)	Misfocusing	Blurred Vision	N/A	NA	1	Event Description: THE REPORTER INDICATED THE SURGEON IMPLANTED A 13.2MM VTICMO13.2 IMPLANTABLE COLLAMER LENS, -15.5/+2.5/087 (SPHERE/CYLINDER/AXIS) INTO THE PATIENT'S LEFT EYE (OS) ON (B)(6) 2020. ON (B)(6) 2020 THE LENS WAS EXCHANGED WITH A SHORTER LENS DUE TO REFRACTIVE SURPRISE. THE PROBLEM IS RESOLVED. THE CAUSE OF THE EVENT IS REPORTED AS UNKNOWN. Manufacturer Narrative: H3-DEVICE EVALUATIO…	Lens Exchange	Resolved
https://www.accessdata.fda.gov/scripts/cdrh/cfdocs/cfMAUDE/Detail.CFM?MDRFOI__ID=11966802&pc=QCB	2023826-2021-01813	2021-05-12 04:00:00	Injury	STAAR SURGICAL COMPANY	2021-06-09 04:00:00	QCB	IMPLANTABLE COLLAMER LENS (ICL)	Misfocusing	Blurred Vision	N/A	NA	1	Event Description: THE REPORTER INDICATED THAT A 12.6MM, VTICM5_12.6, -4.50/1.5/098 (SPHERE/CYLINDER/AXIS), IMPLANTABLE COLLAMER LENS WAS IMPLANTED INTO THE PATIENT'S LEFT EYE (OS) ON (B)(6) 2020 . REFRACTIVE SURPRISE WAS OBSERVED. REFRACTIVE TREATMENT BY CORNEAL T-CUT WAS PERFORMED. THE LENS REMAINS IMPLANTED. PER THE REPORTER ON (B)(6) 2021, AN EXCHANGE IS PLANNED AND WILL UPDATE WHEN EXCHANGE …	Lens Retention	Unknown
https://www.accessdata.fda.gov/scripts/cdrh/cfdocs/cfMAUDE/Detail.CFM?MDRFOI__ID=11986307&pc=QCB	2023826-2021-01875	2021-05-21 04:00:00	Malfunction	STAAR SURGICAL COMPANY	2021-06-11 04:00:00	QCB	IMPLANTABLE COLLAMER LENS (ICL)	Misfocusing	Blurred Vision	N/A	NA	1	Event Description: THE REPORTER INDICATED THAT THE SURGEON IMPLANTED A 13.2MM VTICM5_13.2 IMPLANTABLE COLLAMER LENS, -4.0/+2.0/067 (SPHERE/CYLINDER/AXIS) INTO THE PATIENT'S LEFT EYE (OS) ON (B)(6) 2021. THE SURGEON REPORTS BLURRED NIGHT VISION DUE TO LARGE PUPIL SIZE. REPORTEDLY, THE LENS REMAINS IMPLANTED. Manufacturer Narrative: CLAIM# (B)(4). Manufacturer Narrative: PMA/510(K): THIS PRODUCT IS…	Lens Retention	Unknown
https://www.accessdata.fda.gov/scripts/cdrh/cfdocs/cfMAUDE/Detail.CFM?MDRFOI__ID=12005350&pc=QCB	2023826-2021-01939	NA	Malfunction	STAAR SURGICAL COMPANY	2021-06-15	QCB	IMPLANTABLE COLLAMER LENS (ICL)	Misfocusing	Blurred Vision	NA	NA	1	Event Description: THE REPORTER INDICATED THE SURGEON IMPLANTED A 13.2MM VTICMO13.2 IMPLANTABLE COLLAMER LENS, -14.00/+4.5/080 (SPHERE/CYLINDER/AXIS), INTO THE PATIENTS RIGHT EYE (OD) ON (B)(6) 2015. THE PATIENT WAS REPORTED AS COMPLAINING OF BLURRED VISION. THE LENS REMAINED IMPLANTED. ADDITIONAL INFORMATION HAS BEEN REQUESTED BUT NONE HAS BEEN FORTHCOMING. Manufacturer Narrative: THIS PRODUCT I…	Lens Retention	Unknown
https://www.accessdata.fda.gov/scripts/cdrh/cfdocs/cfMAUDE/Detail.CFM?MDRFOI__ID=12005489&pc=QCB	2023826-2021-01940	NA	Malfunction	STAAR SURGICAL COMPANY	2021-06-15	QCB	IMPLANTABLE COLLAMER LENS (ICL)	Misfocusing	Blurred Vision	NA	NA	1	Event Description: THE REPORTER INDICATED THE SURGEON IMPLANTED A 13.2MM VTICMO13.2 IMPLANTABLE COLLAMER LENS, -11.00/+4.5/099 (SPHERE/CYLINDER/AXIS), INTO THE PATIENTS LEFT EYE (OS) ON (B)(6) 2015. THE PATIENT WAS REPORTED AS COMPLAINING OF BLURRED VISION. THE LENS REMAINED IMPLANTED. ADDITIONAL INFORMATION HAS BEEN REQUESTED BUT NONE HAS BEEN FORTHCOMING. Manufacturer Narrative: THIS PRODUCT IS…	Lens Retention	Unknown
https://www.accessdata.fda.gov/scripts/cdrh/cfdocs/cfMAUDE/Detail.CFM?MDRFOI__ID=12009118&pc=QCB	2023826-2021-01896	2021-04-08 04:00:00	Injury	STAAR SURGICAL COMPANY	2021-06-16 04:00:00	QCB	IMPLANTABLE COLLAMER LENS (ICL)	Misfocusing	Blurred Vision	N/A	NA	1	Event Description: THE REPORTER INDICATED THAT A 13.2MM, VTICM5_13.2, -7.5/.05/058 (SPHERE/CYLINDER/AXIS), IMPLANTABLE COLLAMER LENS WAS IMPLANTED INTO THE PATIENT'S RIGHT EYE (OD) ON (B)(6) 2021. REFRACTIVE SURPRISE WAS OBSERVED, THE LENS WAS REPOSITIONED ON (B)(6) 2021, BUT DID NOT RESOLVE THE PROBLEM. LENS REMAINS IMPLANTED. CAUSE OF THE EVENT IS REPORTED AS UNKNOWN. PER THE REPORTER ON (B)(6)…	Lens Exchange	Resolved
https://www.accessdata.fda.gov/scripts/cdrh/cfdocs/cfMAUDE/Detail.CFM?MDRFOI__ID=12021861&pc=QCB	2023826-2021-02001	2021-03-08 05:00:00	Injury	STAAR SURGICAL COMPANY	2021-06-17 04:00:00	QCB	IMPLANTABLE COLLAMER LENS (ICL)	Misfocusing; Inadequacy of Device Shape and/or Size	Blurred Vision	N/A	NA	1	Event Description: THE REPORTER INDICATED THE SURGEON IMPLANTED A 12.1MM VTICM5_12.1 IMPLANTABLE COLLAMER LENS, -8.0/+1.0/176 (SPHERE/CYLINDER/AXIS) INTO THE PATIENT'S RIGHT EYE (OD) ON (B)(6) 2021. ON (B)(6)2021 THE LENS WAS EXPLANTED AND THEN REPLACED WITH A LONGER LENS DUE TO LOW VAULT AND REFRACTIVE SURPRISE. THE PROBLEM WAS RESOLVED. THE CAUSE OF THE EVENT IS REPORTED AS UNKNOWN. Manufacture…	Lens Exchange	Resolved
https://www.accessdata.fda.gov/scripts/cdrh/cfdocs/cfMAUDE/Detail.CFM?MDRFOI__ID=12029743&pc=QCB	2023826-2021-01916	2021-05-17 04:00:00	Injury	STAAR SURGICAL COMPANY	2021-06-19 04:00:00	QCB	IMPLANTABLE COLLAMER LENS (ICL)	Inadequacy of Device Shape and/or Size	Blurred Vision	NA	NA	1	Event Description: THE REPORTER INDICATED THAT A 12.6MM, VTICM5_12.6, -5.0/1.0/16 (SPHERE/CYLINDER/AXIS), IMPLANTABLE COLLAMER LENS WAS IMPLANTED INTO THE PATIENTS RIGHT EYE (OD) ON (B)(6) 2020. LOW VAULT AND REFRACTIVE CHANGE OVERTIME WAS OBSERVED. LENS REMAINS IMPLANTED. IF ADDITIONAL INFORMATION IS RECEIVED A SUPPLEMENTAL MEDWATCH REPORT WILL BE SUBMITTED. Manufacturer Narrative: B5-THE REPORT…	Lens Exchange	Resolved
https://www.accessdata.fda.gov/scripts/cdrh/cfdocs/cfMAUDE/Detail.CFM?MDRFOI__ID=12060456&pc=QCB	2023826-2021-01953	2021-04-13 04:00:00	Injury	STAAR SURGICAL COMPANY	2021-06-24 04:00:00	QCB	IMPLANTABLE COLLAMER LENS (ICL)	Misfocusing	Blurred Vision	N/A	NA	1	Event Description: THE REPORTER INDICATED THAT A 13.2MM, VTICMO13.2, -15.00/2.0/113 (SPHERE/CYLINDER/AXIS), IMPLANTABLE COLLAMER LENS WAS IMPLANTED INTO THE PATIENT'S RIGHT EYE (OD) ON (B)(6) 2021. ON (B)(6) 2021 THE LENS WAS EXCHANGED WITH A SAME SIZE , SIMILARE (SPHERE/CYLINDER/AXIS) LENS DUE TO REFRACTIVE SURPRISE. THE PROBLEM WAS RESOLVED. CAUSE OF THE EVENT IS REPORTED AS UNKNOWN. Manufactur…	Lens Exchange	Resolved
https://www.accessdata.fda.gov/scripts/cdrh/cfdocs/cfMAUDE/Detail.CFM?MDRFOI__ID=12060470&pc=QCB	2023826-2021-01954	2021-04-13 04:00:00	Injury	STAAR SURGICAL COMPANY	2021-06-24 04:00:00	QCB	IMPLANTABLE COLLAMER LENS (ICL)	Misfocusing	Blurred Vision	N/A	NA	1	Event Description: THE REPORTER INDICATED THAT A 13.2MM, VTICMO13.2, -13.5/1.0/085 (SPHERE/CYLINDER/AXIS), IMPLANTABLE COLLAMER LENS WAS IMPLANTED INTO THE PATIENT'S LEFT EYE (OS) ON (B)(6) 2021. ON (B)(6) 2021 THE LENS WAS EXCHANGED WITH A SAME SIZE , SIMILARE (SPHERE/CYLINDER/AXIS) LENS DUE TO REFRACTIVE SURPRISE. THE PROBLEM WAS RESOLVED. CAUSE OF THE EVENT IS REPORTED AS UNKNOWN. Manufacturer…	Lens Exchange	Resolved
https://www.accessdata.fda.gov/scripts/cdrh/cfdocs/cfMAUDE/Detail.CFM?MDRFOI__ID=12060480&pc=QCB	2023826-2021-01966	NA	Malfunction	STAAR SURGICAL COMPANY	2021-06-24 04:00:00	QCB	IMPLANTABLE COLLAMER LENS (ICL)	Misfocusing	Blurred Vision	N/A	NA	1	Event Description: THE REPORTER INDICATED THAT A 13.2MM, VTICM5_13.2, -12.00/2.5/097 (SPHERE/CYLINDER/AXIS), IMPLANTABLE COLLAMER LENS WAS IMPLANTED INTO THE PATIENT'S LEFT EYE (OS) ON (B)(6) 2021. REFRACTIVE SURPRISE WAS OBSERVED, THE LENS REMAINS IMPLANTED. ADDITIONAL INFORMATION HAS BEEN REQUESTED BUT NONE HAS BEEN FORTHCOMING. IF ADDITIONAL INFORMATION IS RECEIVED A SUPPLEMENTAL MEDWATCH REPO…	Lens Retention	Unknown
https://www.accessdata.fda.gov/scripts/cdrh/cfdocs/cfMAUDE/Detail.CFM?MDRFOI__ID=12060483&pc=QCB	2023826-2021-01967	2020-11-30 05:00:00	Injury	STAAR SURGICAL COMPANY	2021-06-24 04:00:00	QCB	IMPLANTABLE COLLAMER LENS (ICL)	Misfocusing	Blurred Vision	N/A	NA	1	Event Description: THE REPORTER INDICATED THAT A 12.6MM, VTICM5_12.6, -5.00/1.0/072 (SPHERE/CYLINDER/AXIS), IMPLANTABLE COLLAMER LENS WAS IMPLANTED INTO THE PATIENT'S RIGHT EYE (OD) ON (B)(6) 2020. ON (B)(6) 2021 THE LENS WAS REPLACED WITH A SAME SIZE, SIMILARE (SPHERE/CYLINDER/AXIS) LENS DUE TO REFRACTIVE SURPRISE. THE PROBLEM WAS RESOLVED. Manufacturer Narrative: ADDITIONAL INFORMATION: H3 - DE…	Lens Exchange	Resolved
https://www.accessdata.fda.gov/scripts/cdrh/cfdocs/cfMAUDE/Detail.CFM?MDRFOI__ID=12064274&pc=QCB	2023826-2021-02062	2021-05-27 04:00:00	Injury	STAAR SURGICAL COMPANY	2021-06-24 04:00:00	QCB	IMPLANTABLE COLLAMER LENS (ICL)	Misfocusing; Inadequacy of Device Shape and/or Size; Device Dislodged or Dislocated	Blurred Vision	NA	NA	1	Event Description: THE REPORTER INDICATED THE SURGEON IMPLANTED A 12.6MM VTICM5_12.6 IMPLANTABLE COLLAMER LENS, -12.50/+5.5/100 (SPHERE/CYLINDER/AXIS), IN THE PATIENTS RIGHT EYE (OD), ON (B)(6) 2021. THE LENS WAS REPORTED AS HAVING LOW VAULTING, WITH LENS ROTATION. THE PATIENT COMPLAINED OF BLURRED VISION. THE LENS REMAINED IMPLANTED. ADDITIONAL INFORMATION HAS BEEN REQUESTED BUT NONE HAS BEEN FO…	Lens Exchange	Resolved
https://www.accessdata.fda.gov/scripts/cdrh/cfdocs/cfMAUDE/Detail.CFM?MDRFOI__ID=12072254&pc=QCB	2023826-2021-02088	2020-11-11 05:00:00	Injury	STAAR SURGICAL COMPANY	2021-06-25 04:00:00	QCB	IMPLANTABLE COLLAMER LENS (ICL)	Misfocusing	Blurred Vision	N/A	NA	1	Event Description: THE REPORTER INDICATED THE SURGEON IMPLANTED A 13.2MM VTICMO13.2 IMPLANTABLE COLLAMER LENS, -11.0/+1.5/081 (SPHERE/CYLINDER/AXIS) INTO THE PATIENT'S LEFT EYE (OS) ON (B)(6) 2020. ON (B)(6) 2020 THE LENS WAS EXCHANGED WITH A SAME LENGTH, DIFFERENT SPHERE/CYLINDER/AXIS LENS DUE TO REFRACTIVE SURPRISE. THE PROBLEM IS RESOLVED. THE CAUSE OF THE EVENT IS REPORTED AS UNKNOWN. Manufac…	Lens Exchange	Resolved
https://www.accessdata.fda.gov/scripts/cdrh/cfdocs/cfMAUDE/Detail.CFM?MDRFOI__ID=12072262&pc=QCB	2023826-2021-02075	2021-05-07 04:00:00	Malfunction	STAAR SURGICAL COMPANY	2021-06-25 04:00:00	QCB	IMPLANTABLE COLLAMER LENS	Misfocusing	Blurred Vision	N/A	NA	1	Event Description: THE REPORTER STATED THAT THE SURGEON IMPLANTED A 13.2MM VTICM5_13.2, -7.5/+3.0/049 (SPHERE/CYLINDER/AXIS) INTO THE PATIENT'S LEFT EYE (OS). THE SURGEON REPORTS REFRACTIVE SURPRISE. REPORTEDLY, LENS REMAINS IMPLANTED. THE SURGEON STATES, "THE LENS IS WELL ALIGNED IN PLACE AND THE EYE IS QUITE AND STABLE BUT THE SURPRISE REFRACTION IS UNEXPLAINABLE TO US." Manufacturer Narrative:…	Lens Retention	Unknown
https://www.accessdata.fda.gov/scripts/cdrh/cfdocs/cfMAUDE/Detail.CFM?MDRFOI__ID=12072269&pc=QCB	2023826-2021-02097	2021-04-09 04:00:00	Injury	STAAR SURGICAL COMPANY	2021-06-25 04:00:00	QCB	IMPLANTABLE COLLAMER LENS (ICL)	Misfocusing; Off-Label Use	Blurred Vision	N/A	NA	1	Event Description: THE REPORTER INDICATED THE SURGEON IMPLANTED A 12.1MM VTICM5_12.1 IMPLANTABLE COLLAMER LENS, -13.0/+1.0/091 (SPHERE/CYLINDER/AXIS) INTO THE PATIENT'S RIGHT EYE (OD) ON (B)(6) 2021. ON (B)(6) 2021 THE LENS WAS EXCHANGED WITH A SAME LENGTH DIFFERENT MODEL LENS DUE TO REFRACTIVE SURPRISE. PER EMAIL, "ALL IS WELL WITH THE PATIENT." THE CAUSE OF THE EVENT IS REPORTED AS A PATIENT-RE…	Lens Exchange	Resolved
https://www.accessdata.fda.gov/scripts/cdrh/cfdocs/cfMAUDE/Detail.CFM?MDRFOI__ID=12072274&pc=QCB	2023826-2021-02072	2021-05-13 04:00:00	Injury	STAAR SURGICAL COMPANY	2021-06-25 04:00:00	QCB	IMPLANTABLE COLLAMER LENS (ICL)	Misfocusing	Blurred Vision	N/A	NA	1	Event Description: THE REPORTER INDICATED THAT A 12.6MM, VTICMO12.6, -9.5/+1.0/170 (SPHERE/CYLINDER/AXIS), IMPLANTABLE COLLAMER LENS WAS IMPLANTED INTO THE PATIENTS LEFT EYE (OS) ON (B)(6) 2020. REFRACTIVE SURPRISE WAS REPORTED. REPORTEDLY, THE LENS REMAINS IMPLANTED. THE CAUSE OF THE EVENT IS REPORTED AS UNKNOWN. Manufacturer Narrative: B4: IN FOLLOW-UP 1 ENTERED IN ERROR. SHOULD BE BLANK AND DA…	Lens Exchange	Resolved
https://www.accessdata.fda.gov/scripts/cdrh/cfdocs/cfMAUDE/Detail.CFM?MDRFOI__ID=12102507&pc=QCB	2023826-2021-02132	NA	Malfunction	STAAR SURGICAL COMPANY	2021-07-01 04:00:00	QCB	IMPLANTABLE COLLAMER LENS (ICL)	Misfocusing; Device Dislodged or Dislocated	Blurred Vision	N/A	NA	1	Event Description: THE REPORTER INDICATED THAT A 12.6MM, VTICM5_12.6, -13.50/4.0/093 (SPHERE/CYLINDER/AXIS), IMPLANTABLE COLLAMER LENS WAS IMPLANTED INTO THE PATIENT'S RIGHT EYE (OS). LENS ROTATION NOT ASSOCIATED TO A LOW VAULT AND REFRACTIVE CHANGE OVERTIME WERE OBSERVED. LENS REMAINS IMPLANTED. CAUSE OF THE EVENT IS REPORTED AS UNKNOWN. ADDITIONAL INFORMATION HAS BEEN REQUESTED BUT NONE HAS BEE…	Lens Retention	Unknown
https://www.accessdata.fda.gov/scripts/cdrh/cfdocs/cfMAUDE/Detail.CFM?MDRFOI__ID=12102535&pc=QCB	2023826-2021-02131	NA	Injury	STAAR SURGICAL COMPANY	2021-07-01 04:00:00	QCB	IMPLANTABLE COLLAMER LENS (ICL)	Misfocusing; Off-Label Use; Inadequacy of Device Shape and/or Size; Device Dislodged or Dislocated	Blurred Vision	N/A	NA	1	Event Description: THE REPORTER INDICATED THAT A 12.6MM, VTICMO12.6, -15.50/4.0/092 (SPHERE/CYLINDER/AXIS), IMPLANTABLE COLLAMER LENS WAS IMPLANTED INTO THE PATIENT'S RIGHT EYE (OD) (B)(6) 2019. LENS ROTATION NOT ASSOCIATED TO A LOW VAULT AND REFRACTIVE CHANGE OVERTIME WERE OBSERVED. LENS REMAINS IMPLANTED. CAUSE OF THE EVENT IS REPORTED AS DEVICE, "CHANGED POSITION AND NOW OFF AXIS AND POOR UNAI…	Lens Exchange	Resolved
https://www.accessdata.fda.gov/scripts/cdrh/cfdocs/cfMAUDE/Detail.CFM?MDRFOI__ID=12102798&pc=QCB	2023826-2021-02145	2021-06-03 04:00:00	Injury	STAAR SURGICAL COMPANY	2021-07-01 04:00:00	QCB	IMPLANTABLE COLLAMER LENS (ICL)	Misfocusing	Blurred Vision	N/A	NA	1	Event Description: HE REPORTER INDICATED THAT A 13.2MM, VTICM5_13.2, -2.50/6.0/089 (SPHERE/CYLINDER/AXIS), IMPLANTABLE COLLAMER LENS WAS IMPLANTED INTO THE PATIENT'S RIGHT EYE (OD). REFRACTIVE SURPRISE WAS OBSERVED, THE LENS WAS REPOSITIONED ON (B)(6) 2021 BUT THIS DID NOT RESOLVE THE PROBLEM. LENS REMAINS IMPLANTED. ADDITIONAL INFORMATION HAS BEEN REQUESTED BUT NONE HAS BEEN FORTHCOMING. IF ADDI…	Lens Repositioning	Not_Resolved
https://www.accessdata.fda.gov/scripts/cdrh/cfdocs/cfMAUDE/Detail.CFM?MDRFOI__ID=12112717&pc=QCB	2023826-2021-02226	NA	Malfunction	STAAR SURGICAL COMPANY	2021-07-02 04:00:00	QCB	IMPLANTABLE COLLAMER LENS (ICL)	Misfocusing	Blurred Vision	NA	NA	1	Event Description: THE REPORTER INDICATED THAT A 13.2MM, VTICM5_13.2, -7.00/1.0/90, IMPLANTABLE COLLAMER LENS WAS IMPLANTED INTO THE PATIENTS RIGHT EYE (OD) ON (B)(6) 2021. REFRACTIVE SURPRISE AFTER IMPLANT WAS OBSERVED. " THE PATIENT HAS GOT AN HYPEROPIA AND STILL SMOOTH LOSS OF UCVA. LENS REMAINS IMPLANTED. Manufacturer Narrative: B5- LENS REMAINS IMPLANTED. IT WAS REPORTED THAT THE PATEINT IS …	Lens Retention	Resolved
https://www.accessdata.fda.gov/scripts/cdrh/cfdocs/cfMAUDE/Detail.CFM?MDRFOI__ID=12112726&pc=QCB	2023826-2021-02225	NA	Malfunction	STAAR SURGICAL COMPANY	2021-07-02 04:00:00	QCB	IMPLANTABLE COLLAMER LENS (ICL)	Misfocusing	Blurred Vision	NA	NA	1	Event Description: THE REPORTER INDICATED THAT A 13.2MM, VTICM5_13.2, -11.50/1.0/86, IMPLANTABLE COLLAMER LENS WAS IMPLANTED INTO THE PATIENTS LEFT EYE (OS) ON (B)(6) 2021. REFRACTIVE SURPRISE AFTER IMPLANT WAS OBSERVED. " THE PATIENT HAS GOT AN HYPEROPIA AND STILL SMOOTH LOSS OF UCVA. LENS REMAINS IMPLANTED. Manufacturer Narrative: B5- LENS REMAINS IMPLANTED. IT WAS REPORTED THAT THE PATIENT IS …	Lens Retention	Resolved
https://www.accessdata.fda.gov/scripts/cdrh/cfdocs/cfMAUDE/Detail.CFM?MDRFOI__ID=12147536&pc=QCB	2023826-2021-02268	2021-05-24	Malfunction	STAAR SURGICAL COMPANY	2021-07-09	QCB	IMPLANTABLE COLLAMER LENS (ICL)	Misfocusing	Blurred Vision	N/A	NA	1	Event Description: THE REPORTER INDICATED THAT A 13.2MM, VTICM5_13.2, -11/2.0/094 (SPHERE/CYLINDER/AXIS), IMPLANTABLE COLLAMER LENS WAS IMPLANTED INTO THE PATIENT'S RIGHT EYE (OD) ON (B)(6) 2021. REFRACTIVE SURPRISE WAS OBSERVED, THE LENS REMAINS IMPLANTED. REPORTEDLY, "PENTACAM HAS NOT BEEN PERFORMED YET." ADDITIONAL INFORMATION HAS BEEN REQUESTED BUT NONE HAS BEEN FORTHCOMING. IF ADDITIONAL INF…	Lens Retention	Unknown
https://www.accessdata.fda.gov/scripts/cdrh/cfdocs/cfMAUDE/Detail.CFM?MDRFOI__ID=12147853&pc=QCB	2023826-2021-02481	2021-06-05 04:00:00	Injury	STAAR SURGICAL COMPANY	2021-07-09 04:00:00	QCB	IMPLANTABLE COLLAMER LENS (ICL)	Misfocusing	Blurred Vision	NA	NA	1	Event Description: THE REPORTER INDICATED THAT A 12.6MM, VTICM5_12.6, -11.00/4.00/092, IMPLANTABLE COLLAMER LENS WAS IMLPLANTED INTO THE PATIENTS RIGHT EYE (OD) ON (B)(6) 2021. REFRACTIVE SURPRISE WAS NOTED, LENS REMAINS IMPLANTED. . IF ADDITIONAL INFORMATION IS RECEIVED A SUPPLEMENTAL MEDWATCH REPORT WILL BE SUBMITTED. Manufacturer Narrative: B1: ADVERSE EVENT; B2: REQUIRES INTERVENTION TO PREVE…	Lens Exchange + Secondary Operation	Resolved
https://www.accessdata.fda.gov/scripts/cdrh/cfdocs/cfMAUDE/Detail.CFM?MDRFOI__ID=12147855&pc=QCB	2023826-2021-02497	2021-04-13 04:00:00	Injury	STAAR SURGICAL COMPANY	2021-07-09 04:00:00	QCB	IMPLANTABLE COLLAMER LENS (ICL)	Misfocusing	Blurred Vision	NA	NA	1	Event Description: THE REPORTER INDICATED THAT A 13.2MM, VTICMO13.2, -15.0/2.0/100, IMPLANTABLE COLLAMER LENS WAS IMPLANTED INTO THE PATIENTS RIGHT EYE (OD) ON (B)(6) 2020. ON (B)(6) 2021 THE LENS WAS EXCHANGED FOR A DIFFERENT DIOPTER LENS DUE TO REFRACTIVE SURPRISE. THIS EXCHANGE RESOLVED THE PROBLEM. Manufacturer Narrative: ADDITIONAL INFORMATION: H10: IT WAS LATER CLARIFIED THAT THIS CLAIM WAS…	Lens Exchange	Resolved
https://www.accessdata.fda.gov/scripts/cdrh/cfdocs/cfMAUDE/Detail.CFM?MDRFOI__ID=12148279&pc=QCB	2023826-2021-02476	2020-10-15	Injury	STAAR SURGICAL COMPANY	2021-07-11	QCB	IMPLANTABLE COLLAMER LENS (ICL)	Misfocusing; Inadequacy of Device Shape and/or Size	Blurred Vision	N/A	NA	1	Event Description: THE REPORTER INDICATED THAT A 13.2MM VTICM5_13.2, -13.5/+6.0/167 (SPHERE/CYLINDER/AXIS) IMPLANTABLE COLLAMER LENS WAS IMPLANTED INTO THE PATIENT'S RIGHT EYE (OD) ON (B)(6) 2020. ON (B)(6) 2020 THE LENS WAS EXCHANGED WITH A SHORTER LENS DUE TO EXCESSIVE VAULT AND POOR NEAR VISION. THE PROBLEM WAS RESOLVED. Manufacturer Narrative: PT INFO: UNK. PMA/510(K): THIS PRODUCT IS MANUFAC…	Lens Exchange	Resolved
https://www.accessdata.fda.gov/scripts/cdrh/cfdocs/cfMAUDE/Detail.CFM?MDRFOI__ID=12148267&pc=QCB	2023826-2021-02470	2021-06-02 04:00:00	Injury	STAAR SURGICAL COMPANY	2021-07-11 04:00:00	QCB	IMPLANTABLE COLLAMER LENS (ICL)	Misfocusing; Device Dislodged or Dislocated	Blurred Vision	NA	NA	1	Event Description: THE REPORTER INDICATED THAT THE SURGEON IMPLANTED A 13.2MM VTICMO13.2 IMPLANTABLE COLLAMER LENS, -14.0/+6.0/084 (SPHERE/CYLINDER/AXIS), INTO THE PATIENT'S LEFT EYE (OS) ON (B)(6) 2021. THE SURGEON REPORTS LENS ROTATION AND REFRACTIVE SURPRISE. REPORTEDLY AN ADDITIONAL SUTURE WAS ADDED AND ON (B)(6) 2021 THE LENS WAS REPOSITIONED WHICH DID NOT RESOLVE THE PROBLEM. THE CAUSE OF T…	Lens Repositioning	Resolved
https://www.accessdata.fda.gov/scripts/cdrh/cfdocs/cfMAUDE/Detail.CFM?MDRFOI__ID=12148274&pc=QCB	2023826-2021-02471	2021-05-29 04:00:00	Injury	STAAR SURGICAL COMPANY	2021-07-11 04:00:00	QCB	IMPLANTABLE COLLAMER LENS (ICL)	Misfocusing	Blurred Vision	N/A	NA	1	Event Description: THE REPORTER INDICATED THE SURGEON IMPLANTED A 12.6MM VTICMO12.6 IMPLANTABLE COLLAMER LENS, -8.5/+1.0/001 (SPHERE/CYLINDER/AXIS) INTO THE PATIENT'S LEFT EYE (OS) ON (B)(6) 2021. ON (B)(6) 2021 THE LENS WAS EXCHANGED WITH A SAME LENGTH, DIFFERENT SPHERE/AXIS LENS DUE TO REFRACTIVE SURPRISE. THE PROBLEM IS RESOLVED. THE CAUSE OF THE EVENT IS REPORTED AS UNKNOWN. Manufacturer Narr…	Lens Exchange	Resolved
https://www.accessdata.fda.gov/scripts/cdrh/cfdocs/cfMAUDE/Detail.CFM?MDRFOI__ID=12160678&pc=QCB	2023826-2021-02556	2021-06-24 04:00:00	Injury	STAAR SURGICAL COMPANY	2021-07-13 04:00:00	QCB	IMPLANTABLE COLLAMER LENS (ICL)	Misfocusing; Off-Label Use	Blurred Vision	NA	NA	1	Event Description: THE REPORTER INDICATED THAT A 13.2MM VTICMO13.2; -10.0/4.0/090 (SPHERE/CYLINDER/AXIS) IMPLANTABLE COLLAMER LENS WAS IMPLANTED INTO THE PATIENT'S RIGHT EYE (OD) ON (B)(6) 2021. THE PATIENT EXPERIENCED REFRACTIVE SURPRISE. ON (B)(6) 2021 THE LENS WAS EXCHANGED WITH A SAME LENGTH AND MODEL LENS BUT DIFFERENT SPHERE/AXIS AND THIS RESOLVED THE PROBLEM. THE CAUSE OF THE EVENT WAS REP…	Lens Exchange	Resolved
https://www.accessdata.fda.gov/scripts/cdrh/cfdocs/cfMAUDE/Detail.CFM?MDRFOI__ID=12167123&pc=QCB	2023826-2021-02530	NA	Injury	STAAR SURGICAL COMPANY	2021-07-14 04:00:00	QCB	IMPLANTABLE COLLAMER LENS (ICL)	Misfocusing; Inadequacy of Device Shape and/or Size; Patient-Device Incompatibility	Blurred Vision	N/A	NA	1	Event Description: THE REPORTER INDICATED THAT A 12.6MM, VTICM5_12.6, IMPLANTABLE COLLAMER LENS WAS IMPLANTED INTO THE PATIENT'S RIGHT EYE (OD) ON (B)(6) 2021. REFRACTIVE SURPRISE WAS OBSERVED, THE LENS REMAINS IMPLANTED. ADDITIONAL INFORMATION HAS BEEN REQUESTED BUT NONE HAS BEEN FORTHCOMING. IF ADDITIONAL INFORMATION IS RECEIVED A SUPPLEMENTAL MEDWATCH REPORT WILL BE SUBMITTED. Manufacturer Nar…	Lens Exchange	Resolved
https://www.accessdata.fda.gov/scripts/cdrh/cfdocs/cfMAUDE/Detail.CFM?MDRFOI__ID=12167124&pc=QCB	2023826-2021-02531	NA	Injury	STAAR SURGICAL COMPANY	2021-07-14 04:00:00	QCB	IMPLANTABLE COLLAMER LENS (ICL)	Misfocusing; Inadequacy of Device Shape and/or Size; Patient-Device Incompatibility	Blurred Vision	N/A	NA	1	Event Description: THE REPORTER INDICATED THAT A 12.6MM, VTICM0 12.6, IMPLANTABLE COLLAMER LENS WAS IMPLANTED INTO THE PATIENT'S LEFT EYE (OS) ON (B)(6) 2021. REFRACTIVE SURPRISE WAS OBSERVED, THE LENS REMAINS IMPLANTED. ADDITIONAL INFORMATION HAS BEEN REQUESTED BUT NONE HAS BEEN FORTHCOMING. IF ADDITIONAL INFORMATION IS RECEIVED A SUPPLEMENTAL MEDWATCH REPORT WILL BE SUBMITTED. Manufacturer Narr…	Lens Exchange	Resolved
https://www.accessdata.fda.gov/scripts/cdrh/cfdocs/cfMAUDE/Detail.CFM?MDRFOI__ID=12208007&pc=QCB	2023826-2021-02760	2021-05-04 04:00:00	Injury	STAAR SURGICAL COMPANY	2021-07-21 04:00:00	QCB	IMPLANTABLE COLLAMER LENS (ICL)	Misfocusing	Blurred Vision	NA	NA	1	Event Description: THE REPORTER INDICATED THAT A 12.1MM, VICMO12.1, -14.5/2.0/162, IMPLANTABLE COLLAMER LENS WAS IMPLANTED INTO THE PATIENTS RIGHT EYE (OD) ON (B)(6) 2021. ON (B)(6) 2021 THE LENS WAS EXCHANGED FOR A DIFFERENT AXIS LENS. THIS EXCHANGE RESOLVED THE PROBLEM. CAUSE OF EVENT WAS UNKNOWN, THE REPORTER STATED " THE SURGEON INPUT THE WRONG ASTIGMATISM AXIS IN OCOS SYSTEM". Manufacturer N…	Lens Exchange	Resolved
https://www.accessdata.fda.gov/scripts/cdrh/cfdocs/cfMAUDE/Detail.CFM?MDRFOI__ID=12211083&pc=QCB	2023826-2021-02758	2021-03-05 05:00:00	Injury	STAAR SURGICAL COMPANY	2021-07-22 04:00:00	QCB	IMPLANTABLE COLLAMER LENS (ICL)	Misfocusing	Blurred Vision	NA	NA	1	Event Description: THE REPORTER INDICATED THAT A 12.6MM, VTICMO12.6, -12.0/1.0/89, IMPLANTABLE COLLAMER LENS WAS IMPLANTED INTO THE PATIENTS LEFT EYE (OS) ON (B)(6) 2021. ON (B)(6) 2021 THE LENS WAS EXCHANGED FOR A DIFFERENT DIOPTER LENS. THIS EXCHANGE RESOLVED THE PROBLEM. CAUSE OF EVENT WAS UNKNOWN. Manufacturer Narrative: DEVICE EVALUATION: LENS RETURNED IN A MICRO-CENTRIFUGE VIAL WITH MOISTUR…	Lens Exchange	Resolved
https://www.accessdata.fda.gov/scripts/cdrh/cfdocs/cfMAUDE/Detail.CFM?MDRFOI__ID=12214331&pc=QCB	2023826-2021-02694	2021-05-14 04:00:00	Injury	STAAR SURGICAL COMPANY	2021-07-22 04:00:00	QCB	IMPLANTABLE COLLAMER LENS (ICL)	Misfocusing	Blurred Vision	N/A	NA	1	Event Description: THE REPORTER INDICATED THAT A 12.6MM, VTICM5_12.6, -5.50/1.0/090 (SPHERE/CYLINDER/AXIS), IMPLANTABLE COLLAMER LENS WAS IMPLANTED INTO THE PATIENT'S RIGHT EYE (OD) ON (B)(6) 2021. ON (B)(6) 2021 THE LENS WAS REPLACED WITH A SAME SIZE , SIMILARE (SPHERE/CYLINDER/AXIS) LENS DUE TO REFRACTIVE SURPRISE. THE PROBLEM WAS RESOLVED. CAUSE OF THE EVENT IS REPORTED AS UNKNOWN. Manufacture…	Lens Exchange	Resolved
https://www.accessdata.fda.gov/scripts/cdrh/cfdocs/cfMAUDE/Detail.CFM?MDRFOI__ID=12214338&pc=QCB	2023826-2021-02696	2021-06-11 04:00:00	Injury	STAAR SURGICAL COMPANY	2021-07-22 04:00:00	QCB	IMPLANTABLE COLLAMER LENS (ICL)	Misfocusing	Blurred Vision	N/A	NA	1	Event Description: THE REPORTER INDICATED THAT A 13.2MM, VTICM5_13.2, -14.50/3.50/175 (SPHERE/CYLINDER/AXIS), IMPLANTABLE COLLAMER LENS WAS IMPLANTED INTO THE PATIENT'S LEFT EYE (OS) ON (B)(6) 2019. REFRACTIVE SURPRISE WAS OBSERVED, THE LENS REMAINS IMPLANTED. ADDITIONAL INFORMATION HAS BEEN REQUESTED BUT NONE HAS BEEN FORTHCOMING. IF ADDITIONAL INFORMATION IS RECEIVED A SUPPLEMENTAL MEDWATCH REP…	Lens Extraction + Secondary Operation	Resolved
https://www.accessdata.fda.gov/scripts/cdrh/cfdocs/cfMAUDE/Detail.CFM?MDRFOI__ID=12214343&pc=QCB	2023826-2021-02695	2021-06-11 04:00:00	Injury	STAAR SURGICAL COMPANY	2021-07-22 04:00:00	QCB	IMPLANTABLE COLLAMER LENS (ICL)	Misfocusing	Blurred Vision	N/A	NA	1	Event Description: THE REPORTER INDICATED THAT A 13.2MM, VTICM5_13.2, -13.00/3.00/034 (SPHERE/CYLINDER/AXIS), IMPLANTABLE COLLAMER LENS WAS IMPLANTED INTO THE PATIENT'S RIGHT EYE (OD) ON (B)(6) 2019. REFRACTIVE SURPRISE WAS OBSERVED, THE LENS REMAINS IMPLANTED. ADDITIONAL INFORMATION HAS BEEN REQUESTED BUT NONE HAS BEEN FORTHCOMING. IF ADDITIONAL INFORMATION IS RECEIVED A SUPPLEMENTAL MEDWATCH RE…	Lens Extraction + Secondary Operation	Resolved
https://www.accessdata.fda.gov/scripts/cdrh/cfdocs/cfMAUDE/Detail.CFM?MDRFOI__ID=12222277&pc=QCB	2023826-2021-02815	2021-06-29	Malfunction	STAAR SURGICAL COMPANY	2021-07-23	QCB	IMPLANTABLE COLLAMER LENS (ICL)	Misfocusing	Blurred Vision	N/A	NA	1	Event Description: THE REPORTER INDICATED THE SURGEON IMPLANTED A 12.6MM VTICM5_12.6 IMPLANTABLE COLLAMER LENS, -9.5/+1.0/117 (SPHERE/CYLINDER/AXIS) INTO THE PATIENT'S RIGHT EYE (OD) ON (B)(6) 2021. THE SURGEON REPORTS REFRACTIVE SURPRISE. Manufacturer Narrative: PMA/510(K): THIS PRODUCT IS MANUFACTURED IN THE U.S. BUT NOT MARKETED IN THE U.S. (B)(4).	Unknown	Unknown
https://www.accessdata.fda.gov/scripts/cdrh/cfdocs/cfMAUDE/Detail.CFM?MDRFOI__ID=12222317&pc=QCB	2023826-2021-02805	NA	Malfunction	STAAR SURGICAL COMPANY	2021-07-23	QCB	IMPLANTABLE COLLAMER LENS	Misfocusing; Device Dislodged or Dislocated	Blurred Vision	N/A	NA	1	Event Description: THE REPORTER STATED THAT THE SURGEON IMPLANTED A TORIC IMPLANTABLE COLLAMER LENS -14.5/+2.0/064 (SPHERE/CYLINDER/AXIS) INTO THE PATIENT'S LEFT EYE (OS). THE SURGEON REPORTS A SMALL REFRACTIVE ERROR AND LENS ROTATION. ATTEMPTS TO OBTAIN ADDITIONAL INFORMATION HAVE NOT BEEN SUCCESSFUL. Manufacturer Narrative: THIS PRODUCT IS MANUFACTURED IN THE U.S. BUT NOT MARKETED IN THE U.S. (…	Unknown	Unknown
https://www.accessdata.fda.gov/scripts/cdrh/cfdocs/cfMAUDE/Detail.CFM?MDRFOI__ID=12255959&pc=QCB	2023826-2021-02976	2021-05-28	Injury	STAAR SURGICAL COMPANY	2021-07-30	QCB	IMPLANTABLE COLLAMER LENS (ICL)	Misfocusing	Blurred Vision	NA	NA	1	Event Description: THE REPORTER INDICATED THE SURGEON IMPLANTED A 12.6MM VTICMO12.6 IMPLANTABLE COLLAMER LENS, -07.50/+1.0/015 (SPHERE/CYLINDER/AXIS), IN THE PATIENTS RIGHT EYE (OD), ON (B)(6) 2021. THE LENS WAS EXPLANTED ON (B)(6) 2021 DUE TO THE PATIENT EXPERIENCED BLURRED VISION. THE SURGEON DID NOT IMPLANT ANOTHER ICL LENS. THE CAUSE OF THE EVENT WAS DUE TO PATIENT RELATED FACTOR BUT THE DEVI…	Lens Extraction	Unknown
https://www.accessdata.fda.gov/scripts/cdrh/cfdocs/cfMAUDE/Detail.CFM?MDRFOI__ID=12257216&pc=QCB	2023826-2021-02971	2021-06-29	Malfunction	STAAR SURGICAL COMPANY	2021-07-31	QCB	IMPLANTABLE COLLAMER LENS (ICL)	Misfocusing	Blurred Vision	N/A	NA	1	Event Description: THE REPORTER INDICATED THAT A 13.2MM VTICMO13.2, -17.5/+1.0/015 (SPHERE/CYLINDER/AXIS) IMPLANTABLE COLLAMER LENS WAS IMPLANTED INTO THE PATIENT'S LEFT EYE (OS) ON (B)(6) 2021. REFRACTIVE SUPRISE IS REPORTED. THE LENS REMAINS IMPLANTED. THE CAUSE IS REPORTED AS UNKNOWN. Manufacturer Narrative: PT INFO: UNK. PMA/510(K): THIS PRODUCT IS MANUFACTURED IN THE U.S. BUT NOT MARKETED IN…	Lens Retention	Unknown
https://www.accessdata.fda.gov/scripts/cdrh/cfdocs/cfMAUDE/Detail.CFM?MDRFOI__ID=12257224&pc=QCB	2023826-2021-02964	NA	Malfunction	STAAR SURGICAL COMPANY	2021-07-31	QCB	IMPLANTABLE COLLAMER LENS (ICL)	Misfocusing; Device Dislodged or Dislocated	Blurred Vision	N/A	NA	1	Event Description: THE REPORTER INDICATED THE SURGEON IMPLANTED A 13.2MM VTICM5_13.2 IMPLANTABLE COLLAMER LENS, -4.0/+5.0/092 (SPHERE/CYLINDER/AXIS) INTO THE PATIENT'S LEFT EYE (OS). THE SURGEON REPORTS REFRACTIVE SURPRISE AND LENS ROTATION. ATTEMPTS TO OBTAIN ADDITIONAL INFORMATION HAVE NOT BEEN SUCCESSFUL. Manufacturer Narrative: PT INFO: UNK. DATE OF EVENT-UNK IMPLANT DATE-UNK PMA/510(K): THIS…	Unknown	Unknown
https://www.accessdata.fda.gov/scripts/cdrh/cfdocs/cfMAUDE/Detail.CFM?MDRFOI__ID=12257227&pc=QCB	2023826-2021-02970	2021-06-29	Malfunction	STAAR SURGICAL COMPANY	2021-07-31	QCB	IMPLANTABLE COLLAMER LENS (ICL)	Misfocusing	Blurred Vision	N/A	NA	1	Event Description: THE REPORTER INDICATED THAT A 13.2MM VTICMO13.2, -16.5/+0.5/178 (SPHERE/CYLINDER/AXIS) IMPLANTABLE COLLAMER LENS WAS IMPLANTED INTO THE PATIENT'S RIGHT EYE (OD) ON (B)(6) 2021. REFRACTIVE SUPRISE IS REPORTED. THE LENS REMAINS IMPLANTED. THE CAUSE IS REPORTED AS UNKNOWN. Manufacturer Narrative: PT INFO: UNK. PMA/510(K): THIS PRODUCT IS MANUFACTURED IN THE U.S. BUT NOT MARKETED I…	Lens Retention	Unknown
https://www.accessdata.fda.gov/scripts/cdrh/cfdocs/cfMAUDE/Detail.CFM?MDRFOI__ID=12263420&pc=QCB	2023826-2021-02555	2021-07-09 04:00:00	Malfunction	STAAR SURGICAL COMPANY	2021-08-02 04:00:00	QCB	IMPLANTABLE COLLAMER LENS (ICL)	Misfocusing	Blurred Vision	NA	NA	1	Event Description: THE REPORTER INDICATED THAT THE SURGEON IMPLANTED A 12.6MM VTICM5_12.6; -12.00/+2.50/73 (SPHERE/CYLINDER/AXIS) IMPLANTABLE COLLAMER LENS INTO THE PATIENT'S LEFT EYE (OS) ON (B)(6) 2021. THE SURGEON REPORTS REFRACTIVE SURPRISE. THE CAUSE OF THE EVENT WAS REPORTED AS UNKNOWN. LENS REMAINS IMPLANTED. ATTEMPTS TO OBTAIN ADDITIONAL INFORMATION HAVE NOT BEEN SUCCESSFUL. Manufacturer …	Lens Retention	Resolved
https://www.accessdata.fda.gov/scripts/cdrh/cfdocs/cfMAUDE/Detail.CFM?MDRFOI__ID=12278288&pc=QCB	2023826-2021-03053	2021-07-15 04:00:00	Malfunction	STAAR SURGICAL COMPANY	2021-08-04 04:00:00	QCB	IMPLANTABLE COLLAMER LENS (ICL)	Misfocusing	Blurred Vision	N/A	NA	1	Event Description: THE REPORTER INDICATED THAT A 13.2MM VTICMO13.2, -4.0/+4.0/140 (SPHERE/CYLINDER/AXIS) IMPLANTABLE COLLAMER LENS WAS IMPLANTED INTO THE PATIENT'S LEFT EYE (OS) ON (B)(6) 2014. MANIFEST REFRACTION IS REPORTED. THE LENS REMAINS IMPLANTED. Manufacturer Narrative: B5-ADDITIONAL AND CORRECTED INFORMATION: THE LENS WAS IMPLANTED ON (B)(6) 2014. REPORTEDLY, "THE RESULT WAS OK AND THE P…	Lens Retention	Unknown
https://www.accessdata.fda.gov/scripts/cdrh/cfdocs/cfMAUDE/Detail.CFM?MDRFOI__ID=12281699&pc=QCB	2023826-2021-03066	2021-06-07 04:00:00	Malfunction	STAAR SURGICAL COMPANY	2021-08-05 04:00:00	QCB	IMPLANTABLE COLLAMER LENS (ICL)	Misfocusing; No Apparent Adverse Event	Blurred Vision	N/A	NA	1	Event Description: THE REPORTER INDICATED THAT THE SURGEON IMPLANTED AN IMPLANTABLE COLLAMER LENS INTO THE PATIENT'S RIGHT EYE (OD). REFRACTIVE SURPRISE WAS OBSERVED. THE LENS WAS REPOSITIONED, BUT DID NOT RESOLVE THE PROBLEM. THE LENS REMAINS IMPLANTED. ADDITIONAL INFORMATION HAS BEEN REQUESTED BUT NONE HAS BEEN FORTHCOMING. IF ADDITIONAL INFORMATION IS RECEIVED A SUPPLEMENTAL MEDWATCH REPORT WI…	Lens Retention	Unknown
https://www.accessdata.fda.gov/scripts/cdrh/cfdocs/cfMAUDE/Detail.CFM?MDRFOI__ID=12281714&pc=QCB	2023826-2021-03067	2021-06-14 04:00:00	Injury	STAAR SURGICAL COMPANY	2021-08-05 04:00:00	QCB	IMPLANTABLE COLLAMER LENS (ICL)	Misfocusing	Blurred Vision	N/A	NA	1	Event Description: THE REPORTER INDICATED THAT THE SURGEON IMPLANTED AN IMPLANTABLE COLLAMER LENS INTO THE PATIENT'S LEFT EYE (OS). REFRACTIVE SURPRISE WAS OBSERVED. THE LENS WAS REPOSITIONED, BUT DID NOT RESOLVE THE PROBLEM. THE LENS REMAINS IMPLANTED. ADDITIONAL INFORMATION HAS BEEN REQUESTED BUT NONE HAS BEEN FORTHCOMING. IF ADDITIONAL INFORMATION IS RECEIVED A SUPPLEMENTAL MEDWATCH REPORT WIL…	Lens Retention	Unknown
https://www.accessdata.fda.gov/scripts/cdrh/cfdocs/cfMAUDE/Detail.CFM?MDRFOI__ID=12321646&pc=QCB	2023826-2021-03148	2021-05-19 04:00:00	Injury	STAAR SURGICAL COMPANY	2021-08-13 04:00:00	QCB	IMPLANTABLE COLLAMER LENS (ICL)	Misfocusing	Blurred Vision	NA	NA	1	Event Description: THE REPORTER INDICATED THAT A 12.6MM, VTICM5_12.6, -3.50/1.0/171, IMPLANTABLE COLLAMER LENS WAS IMPLANTED INTO THE PATIENTS LEFT EYE (OS) ON (B)(6) 2021. ON (B)(6) 2021 THE LENS WAS EXCHANGED FOR A DIFFERENT MODEL LENS DUE TO REFRACTIVE SURPRISE AND THE PROBLEM RESOLVED. CAUSE OF EVENT WAS UNKNOWN. Manufacturer Narrative: ADDITIONAL INFORMATION: H3-DEVICE EVALUATION: LENS RETUR…	Lens Exchange	Resolved
https://www.accessdata.fda.gov/scripts/cdrh/cfdocs/cfMAUDE/Detail.CFM?MDRFOI__ID=12326006&pc=QCB	2023826-2021-03182	NA	Injury	STAAR SURGICAL COMPANY	2021-08-16	QCB	IMPLANTABLE COLLAMER LENS (ICL)	Misfocusing; Device Dislodged or Dislocated	Blurred Vision	NA	NA	1	Event Description: THE REPORTER INDICATED THAT THE SURGEON IMPLANTED A 13.2MM VTICM5_13.2MM; -1.0/+6.0/098 (SPHERE/CYLINDER/AXIS) IMPLANTABLE COLLAMER LENS INTO THE PATIENT'S RIGHT EYE (OD) ON (B)(6)2021. THE PATIENT EXPERIENCED REFRACTIVE SURPRISE; LENS ROTATION WHICH THE SURGEON PERFORMED REPOSITIONING ON (B)(6) 2021 WHICH DID IMPROVE VISION AND REFRACTIVE BUT AGAIN THE VISION HAS BLURRED AND L…	Lens Retention	Unknown
https://www.accessdata.fda.gov/scripts/cdrh/cfdocs/cfMAUDE/Detail.CFM?MDRFOI__ID=12378554&pc=QCB	2023826-2021-03370	2020-11-27 05:00:00	Injury	STAAR SURGICAL COMPANY	2021-08-27 04:00:00	QCB	IMPLANTABLE COLLAMER LENS (ICL)	Misfocusing; Inadequacy of Device Shape and/or Size	Blurred Vision	N/A	NA	1	Event Description: THE REPORTER INDICATED THAT A 13.2MM VTICMO13.2, -10.5/+0.5/025 (SPHERE/CYLINDER/AXIS) IMPLANTABLE COLLAMER LENS WAS IMPLANTED INTO THE PATIENT'S LEFT EYE (OS) ON (B)(6) 2020. REFRACTIVE SUPRISE AND EXCESSIVE VAULT ARE REPORTED. THE LENS REMAINS IMPLANTED. THE CAUSE IS REPORTED AS UNKNOWN. Manufacturer Narrative: B5 - THE REPORTER INDICATED THAT A 13.2MM VTICMO13.2 -10.5/+0.5/0…	Lens Exchange	Resolved
https://www.accessdata.fda.gov/scripts/cdrh/cfdocs/cfMAUDE/Detail.CFM?MDRFOI__ID=12378674&pc=QCB	2023826-2021-03369	2020-11-27 05:00:00	Injury	STAAR SURGICAL COMPANY	2021-08-27 04:00:00	QCB	IMPLANTABLE COLLAMER LENS (ICL)	Misfocusing; Inadequacy of Device Shape and/or Size	Blurred Vision	N/A	NA	1	Event Description: THE REPORTER INDICATED THAT A 13.2MM VTICMO13.2, -9.0/+0.5/172 (SPHERE/CYLINDER/AXIS) IMPLANTABLE COLLAMER LENS WAS IMPLANTED INTO THE PATIENT'S RIGHT EYE (OD) ON (B)(6) 2020. REFRACTIVE SUPRISE AND EXCESSIVE VAULT ARE REPORTED. THE LENS REMAINS IMPLANTED. THE CAUSE IS REPORTED AS UNKNOWN. Manufacturer Narrative: B5: THE REPORTER INDICATED THAT A 13.2MM VTICMO13.2 -9.0/+0.5/172…	Lens Exchange	Resolved
https://www.accessdata.fda.gov/scripts/cdrh/cfdocs/cfMAUDE/Detail.CFM?MDRFOI__ID=12426115&pc=QCB	2023826-2021-03452	NA	Injury	STAAR SURGICAL COMPANY	2021-09-03	QCB	IMPLANTABLE COLLAMER LENS (ICL)	Misfocusing; Device Dislodged or Dislocated	Blurred Vision	N/A	NA	1	Event Description: THE REPORTER INDICATED THE SURGEON IMPLANTED A 12.6MM VTICM5_12.6 IMPLANTABLE COLLAMER LENS, -13.5/+3.5/092 (SPHERE/CYLINDER/AXIS) INTO THE PATIENT'S RIGHT EYE (OD) ON (B)(6) 2021. ON (B)(6) 2021, THE LENS WAS "REDIALED" DUE TO LENS ROTATION AND REFRACTIVE SURPRISE. REPORTEDLY, THE LENS ROTATED AGAIN. Manufacturer Narrative: WEIGHT, ETHNICITY, RACE: UNK. DATE OF EVENT: UNK. PMA…	Lens Retention	Unknown
https://www.accessdata.fda.gov/scripts/cdrh/cfdocs/cfMAUDE/Detail.CFM?MDRFOI__ID=12443369&pc=QCB	2023826-2021-03537	2021-08-03	Injury	STAAR SURGICAL COMPANY	2021-09-08	QCB	IMPLANTABLE COLLAMER LENS (ICL)	Misfocusing	Blurred Vision	NA	NA	1	Event Description: THE REPORTER INDICATED THAT A 12.1MM, VTICMO12.1, -11.0/1.5/090 (SPHERE/CYLINDER/AXIS), IMPLANTABLE COLLAMER LENS WAS IMPLANTED INTO THE PATIENTS LEFT EYE (OS) ON (B)(6) 2021.ON (B)(6) 2021 THE LENS WAS EXCHANGED FOR A DIFFERENT DIOPTER LENS DUE TO REFRACTIVE CHANGE OVERTIME. THIS EXCHANGE RESOLVED THE PROBLEM. CAUSE OF EVENT WAS UNKNOWN. Manufacturer Narrative: PT INFO: UNK. R…	Lens Exchange	Resolved
https://www.accessdata.fda.gov/scripts/cdrh/cfdocs/cfMAUDE/Detail.CFM?MDRFOI__ID=12457493&pc=QCB	2023826-2021-03557	2021-06-09 04:00:00	Injury	STAAR SURGICAL COMPANY	2021-09-10 04:00:00	QCB	IMPLANTABLE COLLAMER LENS (ICL)	Misfocusing	Blurred Vision	N/A	NA	1	Event Description: THE REPORTER INDICATED THE SURGEON IMPLANTED A 13.7MM VTICM5_13.7 IMPLANTABLE COLLAMER LENS, -13.0/+6.0/044 (SPHERE/CYLINDER/AXIS) INTO THE PATIENT'S LEFT EYE (OS) ON (B)(6) 2021. ON (B)(6) 2021 THE LENS WAS EXPLANTED DUE TO REFRACTIVE SURPRISE. AT A LATER DATE A SAME SIZE DIFFERENT SPHERE/AXIS LENS WAS IMPLANTED AND THE PROBLEM IS RESOLVED. THE CAUSE OF THE EVENT IS REPORTED A…	Lens Exchange	Resolved
https://www.accessdata.fda.gov/scripts/cdrh/cfdocs/cfMAUDE/Detail.CFM?MDRFOI__ID=12457494&pc=QCB	2023826-2021-03558	2021-07-04 04:00:00	Injury	STAAR SURGICAL COMPANY	2021-09-10 04:00:00	QCB	IMPLANTABLE COLLAMER LENS	Misfocusing; Device Dislodged or Dislocated	Blurred Vision	N/A	NA	1	Event Description: THE REPORTER STATED THAT THE SURGEON IMPLANTED A 12.6MM VTICMO12.6, -12.0/+2.0/059 (SPHERE/CYLINDER/AXIS) INTO THE PATIENT'S RIGHT EYE (OD) ON (B)(6) 2021. ON (B)(6) 2021 THE LENS WAS EXCHANGED WITH A LONGER DIFFERENT MODEL LENS DUE TO LENS ROTATION AND LOSS OF BCVA. THE PROBLEM WAS RESOLVED. THE REPORTER STATES, "THERE WERE BIG DIFFERENCES IN WTW MEASUREMENT BY OPD, IOL MASTER…	Lens Exchange	Resolved
https://www.accessdata.fda.gov/scripts/cdrh/cfdocs/cfMAUDE/Detail.CFM?MDRFOI__ID=12479353&pc=QCB	2023826-2021-03598	NA	Malfunction	STAAR SURGICAL COMPANY	2021-09-16	QCB	IMPLANTABLE COLLAMER LENS (ICL)	Device Dislodged or Dislocated	Blurred Vision	NA	NA	1	Event Description: THE REPORTER INDICATED THAT A 13.2MM, VTICMO13.2, -16.5/2/95 (SPHERE/CYLINDER/AXIS), IMPLANTABLE COLLAMER LENS WAS IMPLANTED AS REPLACEMENT LENS DUE TO LENS ROTATION NOT ASSOCIATED TO A LOW VAULT BUT IT DID NOT RESOLVE THE PROBLEM. THE LENS ROTATED AND THE PATIENTS VISION AT EARLY POSTOPERATIVE EXAMINATION WAS ONLY 20/40. THE REPORTER STATED "THE DOCTOR DECIDED TO CONTINUE THE …	Lens Retention	Unknown
https://www.accessdata.fda.gov/scripts/cdrh/cfdocs/cfMAUDE/Detail.CFM?MDRFOI__ID=12479078&pc=QCB	2023826-2021-03590	2021-07-17 04:00:00	Injury	STAAR SURGICAL COMPANY	2021-09-16 04:00:00	QCB	IMPLANTABLE COLLAMER LENS (ICL)	Misfocusing	Blurred Vision	NA	NA	1	Event Description: THE REPORTER INDICATED THAT A 12.1MM, VTICM512.1, -8.00/2.50/89 (SPHERE/CYLINDER/AXIS), IMPLANTABLE COLLAMER LENS WAS IMPLANTED INTO THE PATIENTS LEFT EYE (OS) ON (B)(6) 2021. ON (B)(6) 2021 THE LENS WAS EXCHANGED FOR A DIFFERENT DIOPTER LENS DUE TO REFRACTIVE SURPRISE. THIS EXCHANGE RESOLVED THE PROBLEM. CAUSE OF EVENT WAS UNKNOWN. Manufacturer Narrative: H3: DEVICE EVALUATION…	Lens Exchange	Resolved
https://www.accessdata.fda.gov/scripts/cdrh/cfdocs/cfMAUDE/Detail.CFM?MDRFOI__ID=12479327&pc=QCB	2023826-2021-03657	2021-04-21 04:00:00	Injury	STAAR SURGICAL COMPANY	2021-09-16 04:00:00	QCB	IMPLANTABLE COLLAMER LENS (ICL)	Device Dislodged or Dislocated	Blurred Vision	NA	NA	1	Event Description: THE REPORTER INDICATED THAT A 13.2MM, VTICMO13.2, -16.5/2.0/87 (SPHERE/CYLINDER/AXIS), IMPLANTABLE COLLAMER LENS WAS IMPLANTED INTO THE PATIENT LEFT EYE (OS) ON (B)(6) 2021. THE LENS WAS LATER REPOSITIONED DUE TO LENS ROTATION NOT ASSOCIATED TO A LOW VAULT BUT IT DID NOT RESOLVED THE PROBLEM. ON (B)(6) 2021 THE LENS WAS EXCHANGED FOR A SAME LENGTH LENS BUT THE PROBLEM DID NOT R…	Lens Exchange	Not_Resolved
https://www.accessdata.fda.gov/scripts/cdrh/cfdocs/cfMAUDE/Detail.CFM?MDRFOI__ID=12492856&pc=QCB	2023826-2021-03651	2021-08-13 04:00:00	Injury	STAAR SURGICAL COMPANY	2021-09-17 04:00:00	QCB	IMPLANTABLE COLLAMER LENS (ICL)	Misfocusing; Inadequacy of Device Shape and/or Size	Blurred Vision	NA	NA	1	Event Description: THE REPORTER INDICATED THAT THE SURGEON IMPLANTED A 13.2MM VTICMO13.2 IMPLANTABLE COLLAMER LENS, -10.0/+1.0/090 (SPHERE/CYLINDER/AXIS) INTO THE PATIENT'S LEFT EYE (OS) ON (B)(6) 2021. ON (B)(6) 2021 THE LENS WAS EXCHANGED WITH A SHORTER LENS DUE TO EXCESSIVE VAULT AND REFRACTIVE SURPRISE. THE PROBLEM WAS RESOLVED. THE CAUSE OF THE EVENT IS REPORTED AS UNKNOWN. Manufacturer Narr…	Lens Exchange	Resolved
https://www.accessdata.fda.gov/scripts/cdrh/cfdocs/cfMAUDE/Detail.CFM?MDRFOI__ID=12524398&pc=QCB	2023826-2021-03718	2021-07-06 04:00:00	Injury	STAAR SURGICAL COMPANY	2021-09-24 04:00:00	QCB	IMPLANTABLE COLLAMER LENS (ICL)	Misfocusing; Inadequacy of Device Shape and/or Size	Blurred Vision	NA	NA	1	Event Description: THE REPORTER INDICATED THAT A 12.6MM, VTICMO12.6,-11.5/1.0/68, IMPLANTABLE COLLAMER LENS WAS IMPLANTED INTO THE PATIENTS RIGHT EYE (OD) ON (B)(6) 2021. ON (B)(6) 2021 THE LENS WAS EXPLANTED DUE TO LOW VAULT AND REFRACTIVE SURPRISE. ON (B)(6) 2021 A REPLACEMENT LENS OF LONGER LENGTH AND DIFFERENT DIOPTER WAS IMPLANTED AND THE PROBLEM RESOLVED. CAUSE OF EVENT UNKNOWN. Manufacture…	Lens Exchange	Resolved
https://www.accessdata.fda.gov/scripts/cdrh/cfdocs/cfMAUDE/Detail.CFM?MDRFOI__ID=12537688&pc=QCB	2023826-2021-03697	2021-07-12 04:00:00	Injury	STAAR SURGICAL COMPANY	2021-09-27 04:00:00	QCB	IMPLANTABLE COLLAMER LENS (ICL)	Misfocusing; Device Dislodged or Dislocated	Blurred Vision	P030016	NA	1	Event Description: THE REPORTER INDICATED THE SURGEON IMPLANTED A 12.6MM TMICL12.6 IMPLANTABLE COLLAMER LENS, -09.00/+1.5/069 (SPHERE/CYLINDER/AXIS), INTO THE PATIENTS LEFT EYE (OS) ON (B)(6) 2020. THE LENS WAS REPORTED AS HAVING LENS ROTATION NOT ASSOCIATED TO A LOW VAULT. THE PATIENT COMPLAINED OF BLURRED VISION. THE LENS WAS REPOSITIONED ON (B)(6) 2021 BUT THE PROBLEM WAS NOT RESOLVED. THE PLA…	Lens Exchange	Resolved
https://www.accessdata.fda.gov/scripts/cdrh/cfdocs/cfMAUDE/Detail.CFM?MDRFOI__ID=12550693&pc=QCB	2023826-2021-03794	2021-07-22	Injury	STAAR SURGICAL COMPANY	2021-09-29	QCB	IMPLANTABLE COLLAMER LENS (ICL)	Misfocusing; Device Dislodged or Dislocated	Blurred Vision	NA	NA	1	Event Description: THE REPORTER INDICATED THAT A 12.6MM, VTICMO12.6, -7.50/5.0/02 (SPHERE/CYLINDER/AXIS), IMPLANTABLE COLLAMER LENS WAS IMPLANTED INTO THE PATIENTS LEFT EYE (OS) ON (B)(6) 2021. PATIENT EXPERIENCED REFRACTIVE SURPRISE. THE LENS WAS REPOSITIONED ON (B)(6) 2021 DUE TO A MINOR ROTATION. IT WAS REPORTED THAT THE REPOSITIONING DID NOT RESOLVE THE PROBLEM. THE LENS WAS REMOVED AND ON (B…	Lens Exchange	Resolved
https://www.accessdata.fda.gov/scripts/cdrh/cfdocs/cfMAUDE/Detail.CFM?MDRFOI__ID=12558537&pc=QCB	2023826-2021-03808	2020-10-23	Injury	STAAR SURGICAL COMPANY	2021-09-30	QCB	IMPLANTABLE COLLAMER LENS (ICL)	Misfocusing; Inadequacy of Device Shape and/or Size; Patient-Device Incompatibility	Blurred Vision	N/A	NA	1	Event Description: THE REPORTER INDICATED THE SURGEON IMPLANTED A 12.6MM VTICM5_12.6 IMPLANTABLE COLLAMER LENS, -10.0/+1.0/076 (SPHERE/CYLINDER/AXIS) INTO THE PATIENT'S LEFT EYE (OS) ON (B)(6) 2020. ON (B)(6) 2021 THE LENS WAS EXCHANGED WITH A LONGER LENS DUE TO LOW VAULT AND BLURRED VISION. THE PROBLEM WAS RESOLVED. THE CAUSE OF THE EVENT IS REPORTED AS A PATIENT-RELATED FACTOR, "MAY BE CAUSE OF…	Lens Exchange	Resolved
https://www.accessdata.fda.gov/scripts/cdrh/cfdocs/cfMAUDE/Detail.CFM?MDRFOI__ID=12599770&pc=QCB	2023826-2021-03908	2021-09-09 04:00:00	Injury	STAAR SURGICAL COMPANY	2021-10-08 04:00:00	QCB	IMPLANTABLE COLLAMER LENS	Misfocusing	Blurred Vision	N/A	NA	1	Event Description: THE REPORTER STATED THAT THE SURGEON IMPLANTED A 13.2MM VTICM5_13.2, -10.5/+2.0/020 (SPHERE/CYLINDER/AXIS) INTO THE PATIENT'S LEFT EYE (OS) ON (B)(6) 2021. THE SURGEON REPORTS REFRACTIVE SURPRISE. REPORTEDLY, LENS REMAINS IMPLANTED. THE CAUSE OF THE EVENT IS REPORTED AS UNKNOWN. THE SURGEON STATES, "PATIENT IS UNHAPPY POST OPERATIVELY AS HE ACCEPTS +1/-1.75@145. WITH THIS CORRE…	Lens Repositioning	Resolved
https://www.accessdata.fda.gov/scripts/cdrh/cfdocs/cfMAUDE/Detail.CFM?MDRFOI__ID=12643335&pc=QCB	2023826-2021-04012	2021-09-07 04:00:00	Injury	STAAR SURGICAL COMPANY	2021-10-15 04:00:00	QCB	IMPLANTABLE COLLAMER LENS (ICL)	Adverse Event Without Identified Device or Use Problem	Blurred Vision	NA	NA	1	Event Description: THE REPORTER INDICATED THAT A 13.2MM, VTICMO13.2, -15.5/2.0/112, IMPLANTABLE COLLAMER LENS WAS IMPLANTED INTO THE PATIENTS LEFT EYE (OS) ON (B)(6) 2021. ON (B)(6) 2021 THE LENS WAS EXPLANTED DUE TO LENS TEAR/BREAK DURING INJECTION/DELIVERY INTO THE EYE. IT WAS REPORTED THAT IT WAS UNKNOWN WHEN THE DAMAGE OCCUR AND THAT THE DAMAGE WAS NOTED WHEN WITHDRAWING THE LENS. LOSS OF BCV…	Lens Extraction	Unknown
https://www.accessdata.fda.gov/scripts/cdrh/cfdocs/cfMAUDE/Detail.CFM?MDRFOI__ID=12643795&pc=QCB	2023826-2021-04018	2021-09-15 04:00:00	Injury	STAAR SURGICAL COMPANY	2021-10-16 04:00:00	QCB	IMPLANTABLE COLLAMER LENS (ICL)	Misfocusing	Blurred Vision	NA	NA	1	Event Description: THE REPORTER INDICATED THAT A 13.2MM, VTICMO13.2, -11.00/+3.0/083, IMPLANTABLE COLLAMER LENS WAS IMPLANTED INTO THE PATIENTS LEFT EYE (OS) ON 03 SEP 2021. REFRACTIVE SURPRISE WAS NOTED, LENS REMAINS IMPLANTED. " PATIENT IS ACCEPTING +1/-2.5@12 AND IMPROVING TO 6/5" WAS REPORTED FOR STATUS OF THE EYE (SIGNS/SYMPTOMS). CAUSE OF EVENT WAS UNKNOWN. IF ADDITIONAL INFORMATION IS RECE…	Lens Repositioning	Resolved
https://www.accessdata.fda.gov/scripts/cdrh/cfdocs/cfMAUDE/Detail.CFM?MDRFOI__ID=12678194&pc=QCB	2023826-2021-04106	2021-05-26 04:00:00	Injury	STAAR SURGICAL COMPANY	2021-10-21 04:00:00	QCB	IMPLANTABLE COLLAMER LENS (ICL)	Misfocusing; Device Dislodged or Dislocated	Blurred Vision	NA	NA	1	Event Description: THE REPORTER INDICATED THAT A 13.2MM, VTICMO13.2, -14.5/3.0/122, IMPLANTABLE COLLAMER LENS WAS IMPLANTED INTO THE PATIENTS RIGHT EYE (OD) ON (B)(6) 2021. REFRACTIVE SURPRISE WAS NOTED, LENS REMAINS IMPLANTED. CAUSE OF EVENT WAS UNKNOWN. IF ADDITIONAL INFORMATION IS RECEIVED A SUPPLEMENTAL MEDWATCH REPORT WILL BE SUBMITTED. Manufacturer Narrative: B1 - CORRECTED TO ADVERSE EVENT…	Lens Exchange	Resolved
https://www.accessdata.fda.gov/scripts/cdrh/cfdocs/cfMAUDE/Detail.CFM?MDRFOI__ID=12724193&pc=QCB	2023826-2021-04156	NA	Injury	STAAR SURGICAL COMPANY	2021-10-29	QCB	IMPLANTABLE COLLAMER LENS (ICL)	Misfocusing; Device Dislodged or Dislocated	Blurred Vision	N/A	NA	1	Event Description: THE REPORTER INDICATED THAT A 12.6MM VTICM5_12.6, -7.5/+2.5/087 (SPHERE/CYLINDER/AXIS) IMPLANTABLE COLLAMER LENS WAS IMPLANTED INTO THE PATIENT'S RIGHT EYE (OD) ON (B)(6) 2021. ON (B)(6) 2021 THE LENS WAS REPOSITIONED DUE TO LENS ROTATION AND REFRACTIVE SURPRISE. THE PROBLEM WAS NOT RESOLVED AND THE LENS ROTATED AGAIN. REPORTEDLY, "THE PATIENT COMPLAINED OF REDUCTION OF VISION.…	Lens Repositioning	Not_Resolved
https://www.accessdata.fda.gov/scripts/cdrh/cfdocs/cfMAUDE/Detail.CFM?MDRFOI__ID=12725216&pc=QCB	2023826-2021-04179	2021-09-06	Injury	STAAR SURGICAL COMPANY	2021-10-30	QCB	IMPLANTABLE COLLAMER LENS (ICL)	Misfocusing	Blurred Vision	NA	NA	1	Event Description: THE REPORTER INDICATED THAT A 13.2MM, VTICM5_13.2, -8.50/2.50/018, IMPLANTABLE COLLAMER LENS WAS IMPLANTED INTO THE PATIENTS LEFT EYE (OS) ON (B)(6) 2021. PER UPDATED INFORMATION AN EXCHANGED WAS CARRIED OUT ON (B)(6) 2021. THE REPORTER STATED THAT THE SURGEON HAS CONFIRMED THAT THE PATIENT IS NOW DOING WELL. CAUSE OF EVENT WAS UNKNOWN. Manufacturer Narrative: PMA/510K: THIS PR…	Lens Exchange	Resolved
https://www.accessdata.fda.gov/scripts/cdrh/cfdocs/cfMAUDE/Detail.CFM?MDRFOI__ID=12725051&pc=QCB	2023826-2021-04168	2021-03-13 05:00:00	Injury	STAAR SURGICAL COMPANY	2021-10-30 04:00:00	QCB	IMPLANTABLE COLLAMER LENS (ICL)	Misfocusing	Blurred Vision	NA	NA	1	Event Description: THE REPORTER INDICATED THAT A 13.2MM, VTICMO13.2, -13.0/1.0/102, IMPLANTABLE COLLAMER LENS WAS IMPLANTED INTO THE PATIENTS RIGHT EYE (OD) ON (B)(6) 2021. ON (B)(6) 2021 THE LENS WAS EXCHANGED FOR A DIFFERENT POWER LENS DUE TO REFRACTIVE SURPRISE. THIS EXCHANGE RESOLVED THE PROBLEM. CAUSE OF EVENT WAS UNKNOWN. Manufacturer Narrative: H3- DEVICE EVALUATION: THE PRODUCT WAS RETURN…	Lens Exchange	Resolved
https://www.accessdata.fda.gov/scripts/cdrh/cfdocs/cfMAUDE/Detail.CFM?MDRFOI__ID=12725068&pc=QCB	2023826-2021-04167	2021-07-13 04:00:00	Injury	STAAR SURGICAL COMPANY	2021-10-30 04:00:00	QCB	IMPLANTABLE COLLAMER LENS (ICL)	Misfocusing	Blurred Vision	NA	NA	1	Event Description: THE REPORTER INDICATED THAT A 12.6MM, VTICMO12.6, -8.5/1.5/172, IMPLANTABLE COLLAMER LENS WAS IMPLANTED INTO THE PATIENTS LEFT EYE (OS) ON (B)(6) 2021. ON (B)(6) 2021 THE LENS WAS EXCHANGED FOR A DIFFERENT POWER LENS DUE TO REFRACTIVE SURPRISE. THIS EXCHANGE RESOLVED THE PROBLEM. CAUSE OF EVENT WAS USER ERROR, THE REPORTER STATED "THE DOCTOR DID NOT ENTER WHEN CALCULATING THE C…	Lens Exchange	Resolved
https://www.accessdata.fda.gov/scripts/cdrh/cfdocs/cfMAUDE/Detail.CFM?MDRFOI__ID=12749569&pc=QCB	2023826-2021-04228	2021-09-24 04:00:00	Injury	STAAR SURGICAL COMPANY	2021-11-03 04:00:00	QCB	IMPLANTABLE COLLAMER LENS (ICL)	Misfocusing	Blurred Vision	NA	NA	1	Event Description: THE REPORTER INDICATED THAT A 12.6MM, VTICM5_12.6, -7.5/1.5/101, IMPLANTABLE COLLAMER LENS WAS IMPLANTED INTO THE PATIENTS LEFT EYE (OS) ON (B)(6) 2021. ON (B)(6) 2021 THE LENS WAS EXCHANGED FOR A DIFFERENT POWER LENS DUE TO REFRACTIVE SURPRISE. THIS EXCHANGE RESOLVED THE PROBLEM. CAUSE OF EVENT WAS UNKNOWN. Manufacturer Narrative: H3- DEVICE EVALUATION: THE LENS WAS RETURNED D…	Lens Exchange	Resolved
https://www.accessdata.fda.gov/scripts/cdrh/cfdocs/cfMAUDE/Detail.CFM?MDRFOI__ID=12755752&pc=QCB	2023826-2021-04209	2021-08-24 04:00:00	Malfunction	STAAR SURGICAL COMPANY	2021-11-06 04:00:00	QCB	IMPLANTABLE COLLAMER LENS	Misfocusing	Blurred Vision	N/A	NA	1	Event Description: THE REPORTER STATED THAT THE SURGEON IMPLANTED A 12.6MM VTICM5_12.6, -3.5/+0.5/116 (SPHERE/CYLINDER/AXIS) INTO THE PATIENT'S LEFT EYE (OS) ON (B)(6) 2021. THE SURGEON REPORTS REFRACTIVE SURPRISE. REPORTEDLY, LENS REMAINS IMPLANTED. Manufacturer Narrative: H6: INVESTIGATION CODE 3331: DEVICE HISTORY RECORD (DHR) REVIEW-BASED ON THE RESULTS OF THE INVESTIGATION, ALL RELEASED DEVI…	Lens Retention	Unknown
https://www.accessdata.fda.gov/scripts/cdrh/cfdocs/cfMAUDE/Detail.CFM?MDRFOI__ID=12755753&pc=QCB	2023826-2021-04208	2021-08-24 04:00:00	Malfunction	STAAR SURGICAL COMPANY	2021-11-06 04:00:00	QCB	IMPLANTABLE COLLAMER LENS	Misfocusing	Blurred Vision	N/A	NA	1	Event Description: THE REPORTER STATED THAT THE SURGEON IMPLANTED A 12.6MM VTICM5_12.6, -2.5/+0.5/083 (SPHERE/CYLINDER/AXIS) INTO THE PATIENT'S RIGHT EYE (OD) ON (B)(6) 2021. THE SURGEON REPORTS REFRACTIVE SURPRISE. REPORTEDLY, LENS REMAINS IMPLANTED. THE CAUSE OF THE EVENT IS REPORTED AS UNKNOWN. THE SURGEON STATES, "THE REFRACTION WAS REMINDED UNCORRECTED (OR WORSE) AT 1D POST-OPE AND THE PATIE…	Lens Retention	Resolved
https://www.accessdata.fda.gov/scripts/cdrh/cfdocs/cfMAUDE/Detail.CFM?MDRFOI__ID=12763784&pc=QCB	2023826-2021-04231	2021-10-06 04:00:00	Malfunction	STAAR SURGICAL COMPANY	2021-11-07 04:00:00	QCB	IMPLANTABLE COLLAMER LENS (ICL)	Misfocusing; Device Dislodged or Dislocated	Blurred Vision	NA	NA	1	Event Description: THE REPORTER INDICATED THAT A 12.6MM, VTICM5_12.6, -11.5/3.0/095 (SPHERE/CYLINDER/AXIS), IMPLANTABLE COLLAMER LENS WAS IMPLANTED INTO THE PATIENTS RIGHT EYE (OD) ON (B)(6) 2021. LENS ROTATION NOT ASSOCIATED TO A LOW VAULT AND REFRACTIVE SURPRISE WAS OBSERVED. LENS REMAINS IMPLANTED. CAUSE OF EVENT WAS UNKNOWN. Manufacturer Narrative: WEIGHT, ETHNICITY, RACE: UNK. DATE OF EVENT:…	Lens Retention	Unknown
https://www.accessdata.fda.gov/scripts/cdrh/cfdocs/cfMAUDE/Detail.CFM?MDRFOI__ID=12807798&pc=QCB	2023826-2021-04263	2021-08-17 04:00:00	Injury	STAAR SURGICAL COMPANY	2021-11-12 05:00:00	QCB	IMPLANTABLE COLLAMER LENS (ICL)	Misfocusing; Off-Label Use	Blurred Vision	N/A	NA	1	Event Description: THE REPORTER INDICATED THE SURGEON IMPLANTED A 12.6MM VTICMO12.6 IMPLANTABLE COLLAMER LENS, -9.5/+1.5/174 (SPHERE/ CYLINDER/ AXIS) INTO THE PATIENT'S LEFT EYE (OS) ON (B)(6) 2021. ON (B)(6) 2021 THE LENS WAS EXCHANGED WITH A SAME LENGTH DIFFERENT MODEL LENS DUE TO REFRACTIVE SURPRISE. THE PROBLEM IS RESOLVED. THE CAUSE OF THE EVENT IS REPORTED AS UNKNOWN. Manufacturer Narrative…	Lens Exchange	Resolved
https://www.accessdata.fda.gov/scripts/cdrh/cfdocs/cfMAUDE/Detail.CFM?MDRFOI__ID=12808809&pc=QCB	2023826-2021-04333	2021-10-12 04:00:00	Injury	STAAR SURGICAL COMPANY	2021-11-15 05:00:00	QCB	IMPLANTABLE COLLAMER LENS (ICL)	Misfocusing	Blurred Vision	NA	NA	1	Event Description: THE REPORTER INDICATED THAT A 12.6MM, VTICMO12.6, -15.0/+0.5/138, IMPLANTABLE COLLAMER LENS WAS IMPLANTED INTO THE PATIENTS LEFT EYE (OS) ON (B)(6) 2020. REFRACTIVE SURPRISE WAS OBSERVED, LENS REMAINS IMPLANTED. CAUSE OF EVENT IS UNKNOWN. IF ADDITIONAL INFORMATION IS RECEIVED A SUPPLEMENTAL MEDWATCH REPORT WILL BE SUBMITTED. Manufacturer Narrative: B5- PER UPDATED INFORMATION O…	Lens Exchange	Resolved
https://www.accessdata.fda.gov/scripts/cdrh/cfdocs/cfMAUDE/Detail.CFM?MDRFOI__ID=12849444&pc=QCB	2023826-2021-04442	2021-09-10 04:00:00	Injury	STAAR SURGICAL COMPANY	2021-11-19 05:00:00	QCB	IMPLANTABLE COLLAMER LENS (ICL)	Misfocusing	Blurred Vision	NA	NA	1	Event Description: THE REPORTER INDICATED THAT A 13.2MM, VTICM5_13.2, -11.50/+1.50/97, IMPLANTABLE COLLAMER LENS WAS IMPLANTED INTO THE PATIENTS RIGHT EYE (OD) ON (B)(6) 2021. ON (B)(6) 2021 THE LENS WAS EXCHANGED FOR A SHORTER LENGTH AND DIFFERENT POWER LENS DUE TO REFRACTIVE SURPRISE. THIS EXCHANGE RESOLVED THE PROBLEM. CAUSE OF EVENT WAS UNKNOWN. Manufacturer Narrative: THIS PRODUCT IS NOT MAR…	Lens Exchange	Resolved
https://www.accessdata.fda.gov/scripts/cdrh/cfdocs/cfMAUDE/Detail.CFM?MDRFOI__ID=12872781&pc=QCB	2023826-2021-04487	2021-08-30 04:00:00	Injury	STAAR SURGICAL COMPANY	2021-11-24 05:00:00	QCB	IMPLANTABLE COLLAMER LENS (ICL)	Misfocusing; Off-Label Use; Inadequacy of Device Shape and/or Size; Device Dislodged or Dislocated	Blurred Vision	NA	NA	1	Event Description: THE REPORTER INDICATED THE SURGEON IMPLANTED A 12.1MM VTICM5_12.1 IMPLANTABLE COLLAMER LENS, -07.00/+2.5/105 (SPHERE/CYLINDER/AXIS), IN THE PATIENTS RIGHT EYE (OD) ON (B)(6) 2021. THE LENS WAS EXPLANTED ON (B)(6) 2021 DUE TO LOW VAULTING, LENS ROTATION AND BLURRED VISION. THE LENS WAS REPOSITIONED BUT THE PROBLEM WAS NOT RESOLVED AND THE LENS WAS REMOVED. THE LENS WAS REPLACED …	Lens Exchange	Resolved
https://www.accessdata.fda.gov/scripts/cdrh/cfdocs/cfMAUDE/Detail.CFM?MDRFOI__ID=12872828&pc=QCB	2023826-2021-04488	2021-08-30 04:00:00	Injury	STAAR SURGICAL COMPANY	2021-11-24 05:00:00	QCB	IMPLANTABLE COLLAMER LENS (ICL)	Misfocusing; Off-Label Use; Inadequacy of Device Shape and/or Size; Device Dislodged or Dislocated	Blurred Vision	NA	NA	1	Event Description: THE REPORTER INDICATED THE SURGEON IMPLANTED A 12.1MM VTICM5_12.1 IMPLANTABLE COLLAMER LENS, -07.50/+4.0/079 (SPHERE/ CYLINDER/ AXIS), IN THE PATIENTS LEFT EYE (OS) ON (B)(6) 2021. THE LENS WAS EXPLANTED ON (B)(6) 2021 DUE TO LOW VAULTING, LENS ROTATION AND BLURRED VISION. THE LENS WAS REPOSITIONED BUT THE PROBLEM WAS NOT RESOLVED AND THE LENS WAS REMOVED. THE LENS WAS REPLACED…	Lens Exchange	Resolved
https://www.accessdata.fda.gov/scripts/cdrh/cfdocs/cfMAUDE/Detail.CFM?MDRFOI__ID=12879840&pc=QCB	2023826-2021-04526	2021-03-03 05:00:00	Injury	STAAR SURGICAL COMPANY	2021-11-27 05:00:00	QCB	IMPLANTABLE COLLAMER LENS (ICL)	Device Dislodged or Dislocated	Blurred Vision	NA	NA	1	Event Description: THE REPORTER INDICATED THAT A 12.1MM, VTICMO12.1, -16.5/5.0/100, IMPLANTABLE COLLAMER LENS WAS IMPLANTED INTO THE PATIENTS RIGHT EYE (OD) ON (B)(6) 2021. ON (B)(6) 2021 THE LENS WAS EXCHANGED FOR A LONGER LENGTH LENS DUE TO LENS ROTATION NOT ASSOCIATED TO A LOW VAULT AND BLURRED VISION. THIS EXCHANGE RESOLVED THE PROBLEM. CAUSE OF EVENT WAS UNKNOWN. Manufacturer Narrative: H3- …	Lens Exchange	Resolved
https://www.accessdata.fda.gov/scripts/cdrh/cfdocs/cfMAUDE/Detail.CFM?MDRFOI__ID=12911285&pc=QCB	2023826-2021-04623	2021-09-25 04:00:00	Injury	STAAR SURGICAL COMPANY	2021-12-01 05:00:00	QCB	IMPLANTABLE COLLAMER LENS (ICL)	Misfocusing	Blurred Vision	NA	NA	1	Event Description: THE REPORTER INDICATED THAT THE SURGEON IMPLANTED A 12.6MM VTICMO12.6; -10.0/3.5/079 (SPHERE/CYLINDER/AXIS) IMPLANTABLE COLLAMER LENS INTO THE PATIENT'S RIGHT EYE (OD) ON (B)(6) 2021. ON (B)(6) 2021 THE LENS WAS EXCHANGED WITH A LONGER LENGTH SIMILAR POWER DIFFERENT CYLINDER/AXIS LENS DUE TO REFRACTIVE SURPRISE AND REFRACTIVE CHANGE OVER TIME. THIS RESOLVED THE PROBLEM. THE CAU…	Lens Exchange	Resolved
https://www.accessdata.fda.gov/scripts/cdrh/cfdocs/cfMAUDE/Detail.CFM?MDRFOI__ID=12973012&pc=QCB	2023826-2021-04653	2021-03-05 05:00:00	Injury	STAAR SURGICAL COMPANY	2021-12-09 05:00:00	QCB	IMPLANTABLE COLLAMER LENS (ICL)	Misfocusing; Device Dislodged or Dislocated	Blurred Vision	NA	NA	1	Event Description: THE REPORTER INDICATED THE SURGEON IMPLANTED A 12.1MM VTICMO12.1 IMPLANTABLE COLLAMER LENS, -15.50/+5.5/092 (SPHERE/CYLINDER/AXIS), IN THE PATIENTS LEFT EYE (OS), ON (B)(6) 2021. THE LENS WAS EXPLANTED ON (B)(6) 2021 DUE TO LENS ROTATION NOT ASSOCIATED TO A LOW VAULT AND BLURRED VISION. THE LENS WAS REPOSITIONED ON (B)(6) 2021 BUT THE PROBLEM WAS NOT RESOLVED SO THE LENS WAS EX…	Lens Exchange	Resolved
https://www.accessdata.fda.gov/scripts/cdrh/cfdocs/cfMAUDE/Detail.CFM?MDRFOI__ID=12973346&pc=QCB	2023826-2021-04707	2021-06-18 04:00:00	Injury	STAAR SURGICAL COMPANY	2021-12-09 05:00:00	QCB	IMPLANTABLE COLLAMER LENS (ICL)	Misfocusing	Blurred Vision	N/A	NA	1	Event Description: THE REPORTER INDICATED THE SURGEON IMPLANTED A 12.1MM VTICM5_12.1 IMPLANTABLE COLLAMER LENS, -7.5/+1.5/000 (SPHERE/CYLINDER/AXIS) INTO THE PATIENT'S RIGHT EYE (OD) ON (B)(6) 2021. ON (B)(6) 2021 THE LENS WAS EXCHANGED WITH A SAME SIZE, DIFFERENT SPHERE/AXIS LENS DUE TO REFRACTIVE SURPRISE. THE PROBLEM IS RESOLVED. Manufacturer Narrative: WEIGHT, ETHNICITY, RACE: UNK PMA/510(K):…	Lens Exchange	Resolved
https://www.accessdata.fda.gov/scripts/cdrh/cfdocs/cfMAUDE/Detail.CFM?MDRFOI__ID=12973347&pc=QCB	2023826-2021-04711	2020-10-30 04:00:00	Injury	STAAR SURGICAL COMPANY	2021-12-09 05:00:00	QCB	IMPLANTABLE COLLAMER LENS	Misfocusing	Blurred Vision	N/A	NA	1	Event Description: THE REPORTER STATED THAT THE SURGEON IMPLANTED A 12.6MM VTICM5_12.6, -12.0/+2.5/090 (SPHERE/CYLINDER/AXIS) INTO THE PATIENT'S LEFT EYE (OS) ON (B)(6) 2020. THE SURGEON REPORTS REFRACTIVE SURPRISE. REPORTEDLY, LENS REMAINS IMPLANTED. Manufacturer Narrative: B5-REPORTEDLY THE SURGEON REPOSITIONED THE LENS AND AS OF (B)(6) 2021 THE UCVA IS 20/20. CLAIM# (B)(4). Manufacturer Narrat…	Lens Repositioning	Resolved
https://www.accessdata.fda.gov/scripts/cdrh/cfdocs/cfMAUDE/Detail.CFM?MDRFOI__ID=12973353&pc=QCB	2023826-2021-04697	2020-03-10 04:00:00	Injury	STAAR SURGICAL COMPANY	2021-12-09 05:00:00	QCB	IMPLANTABLE COLLAMER LENS (ICL)	Misfocusing	Blurred Vision	N/A	NA	1	Event Description: THE REPORTER INDICATED THE SURGEON IMPLANTED A 12.6MM VTICM5_12.6 IMPLANTABLE COLLAMER LENS, -9.5/+2.5/093 (SPHERE/CYLINDER/AXIS) INTO THE PATIENT'S RIGHT EYE (OD) ON (B)(6) 2020. ON (B)(6)2020 THE LENS WAS EXCHANGED WITH A SAME SIZE, DIFFERENT SPHERE/CYLINDER/AXIS LENS DUE TO REFRACTIVE SURPRISE. THE PROBLEM IS RESOLVED. THE CAUSE OF THE EVENT IS REPORTED AS UNKNOWN. Manufactu…	Lens Exchange	Resolved
https://www.accessdata.fda.gov/scripts/cdrh/cfdocs/cfMAUDE/Detail.CFM?MDRFOI__ID=13023235&pc=QCB	2023826-2021-04887	2021-11-04 04:00:00	Injury	STAAR SURGICAL COMPANY	2021-12-16 05:00:00	QCB	IMPLANTABLE COLLAMER LENS (ICL)	Misfocusing; Inadequacy of Device Shape and/or Size	Blurred Vision	N/A	NA	1	Event Description: THE REPORTER INDICATED THAT A 13.7MM VTICM5_13.7, -12.0/+0.5/119 (SPHERE/CYLINDER/AXIS) IMPLANTABLE COLLAMER LENS WAS IMPLANTED INTO THE PATIENT'S LEFT EYE (OS) ON (B)(6) 2021. ON (B)(6) 2021 THE LENS WAS EXCHANGED WITH A SHORTER LENS DUE TO EXCESSIVE VAULT AND BLURRED VISION. THE PROBLEM WAS RESOLVED. THE CAUSE OF THE EVENT IS REPORTED AS UNKNOWN. Manufacturer Narrative: THIS …	Lens Exchange	Resolved
https://www.accessdata.fda.gov/scripts/cdrh/cfdocs/cfMAUDE/Detail.CFM?MDRFOI__ID=13040123&pc=QCB	2023826-2021-04906	2021-08-19 04:00:00	Injury	STAAR SURGICAL COMPANY	2021-12-18 05:00:00	QCB	IMPLANTABLE COLLAMER LENS (ICL)	Misfocusing	Blurred Vision	NA	NA	1	Event Description: THE REPORTER INDICATED THAT THE SURGEON IMPLANTED A 13.2MM VTICMO13.2; -8.5/3.0/95 (SPHERE/ CYLINDER/ AXIS) IMPLANTABLE COLLAMER LENS INTO THE PATIENT'S LEFT EYE (OS) ON (B)(6) 2021. THE PATIENT EXPERIENCED REFRACTIVE SURPRISE AND IT WAS INDICATED THAT THE 13.2MM LENS CAUSED A OVERCORRECTION; WHICH MADE IT DIFFICULT TO READ UP CLOSE FOR THE PATIENT. ON (B)(6) 2021 THE LENS WAS …	Lens Exchange	Not_Resolved
https://www.accessdata.fda.gov/scripts/cdrh/cfdocs/cfMAUDE/Detail.CFM?MDRFOI__ID=13082112&pc=QCB	2023826-2021-04987	2021-12-07 05:00:00	Malfunction	STAAR SURGICAL COMPANY	2021-12-23 05:00:00	QCB	IMPLANTABLE COLLAMER LENS (ICL)	Misfocusing; Inadequacy of Device Shape and/or Size	Blurred Vision	NA	NA	1	Event Description: THE REPORTER INDICATED THAT THE SURGEON IMPLANTED A 13.2MM VTICM5_13.2; -5.5/5.0/90 (SPHERE/CYLINDER/AXIS) IMPLANTABLE COLLAMER LENS INTO THE PATIENT'S LEFT EYE (OS) ON (B)(6) 2021. THE PATIENT EXPERIENCED EXCESSIVE VAULTING AND REFRACTIVE SURPRISE. THE CAUSE OF THE EVENT WAS REPORTED AS UNKNOWN. LENS REMAINS IMPLANTED. Manufacturer Narrative: PMA/510(K): THIS PRODUCT IS MANUFA…	Lens Retention	Resolved
https://www.accessdata.fda.gov/scripts/cdrh/cfdocs/cfMAUDE/Detail.CFM?MDRFOI__ID=13082432&pc=QCB	2023826-2021-04962	2021-11-10 05:00:00	Injury	STAAR SURGICAL COMPANY	2021-12-23 05:00:00	QCB	IMPLANTABLE COLLAMER LENS (ICL)	Misfocusing; Off-Label Use	Blurred Vision	N/A	NA	1	Event Description: THE REPORTER INDICATED THE SURGEON IMPLANTED A 12.1MM VTICMO12.1 IMPLANTABLE COLLAMER LENS, -12.0/+2.0/046 (SPHERE/CYLINDER/AXIS) INTO THE PATIENT'S RIGHT EYE (OD) ON (B)(6) 2021. ON (B)(6) 2021, THE LENS WAS EXCHANGED WITH A SAME LENGTH, DIFFERENT SPHERE/AXIS LENS DUE TO REFRACTIVE SURPRISE. REPORTEDLY THE REPLACEMENT LENS WAS IMPLANTED VERTICALLY. THE PROBLEM IS RESOLVED. THE…	Lens Exchange	Resolved
https://www.accessdata.fda.gov/scripts/cdrh/cfdocs/cfMAUDE/Detail.CFM?MDRFOI__ID=13082443&pc=QCB	2023826-2021-04968	2021-07-08 04:00:00	Injury	STAAR SURGICAL COMPANY	2021-12-23 05:00:00	QCB	IMPLANTABLE COLLAMER LENS (ICL)	Misfocusing; Patient-Device Incompatibility	Blurred Vision	N/A	NA	1	Event Description: THE REPORTER INDICATED THE SURGEON IMPLANTED A 13.2MM VTICM5_13.2 IMPLANTABLE COLLAMER LENS, -13.0/+3.5/076 (SPHERE/CYLINDER/AXIS) INTO THE PATIENT'S LEFT EYE (OS) ON (B)(6) 2021. ON (B)(6)2021 THE LENS WAS REPOSITIONED DUE TO REFRACTIVE SURPRISE. ON (B)(6) 2021 THE LENS WAS EXCHANGED WITH A SAME SIZE, DIFFERENT AXIS LENS AND THE PROBLEM IS RESOLVED. THE CAUSE OF THE EVENT IS R…	Lens Exchange	Resolved
https://www.accessdata.fda.gov/scripts/cdrh/cfdocs/cfMAUDE/Detail.CFM?MDRFOI__ID=13090705&pc=QCB	2023826-2021-04997	2021-10-28 04:00:00	Injury	STAAR SURGICAL COMPANY	2021-12-27 05:00:00	QCB	IMPLANTABLE COLLAMER LENS (ICL)	Misfocusing	Blurred Vision	NA	NA	1	Event Description: THE REPORTER INDICATED THAT THE SURGEON IMPLANTED A 12.6MM VTICMO12.6; -10.5/3.5/088 (SPHERE/CYLINDER/AXIS) IMPLANTABLE COLLAMER LENS INTO THE PATIENT'S LEFT EYE (OS) ON (B)(6) 2021. THE PATIENT EXPERIENCED REFRACTIVE SURPRISE. ON (B)(6) 2021 THE LENS WAS EXCHANGED WITH A SAME LENGTH BUT DIFFERENT POWER LENS AND THIS RESOLVED THE PROBLEM. THE CAUSE OF THE EVENT WAS REPORTED AS …	Lens Exchange	Resolved
https://www.accessdata.fda.gov/scripts/cdrh/cfdocs/cfMAUDE/Detail.CFM?MDRFOI__ID=13115042&pc=QCB	2023826-2021-05018	2020-12-22 05:00:00	Injury	STAAR SURGICAL COMPANY	2021-12-29 05:00:00	QCB	IMPLANTABLE COLLAMER LENS (ICL)	Misfocusing; Off-Label Use	Blurred Vision	NA	NA	1	Event Description: THE REPORTER INDICATED THAT THE SURGEON IMPLANTED A 12.6MM VTICMO12.6; -6.5/1.0/87 (SPHERE/CYLINDER/AXIS) IMPLANTABLE COLLAMER LENS INTO THE PATIENT'S RIGHT EYE (OD) ON (B)(6) 2020. ON (B)(6) 2020 THE LENS WAS EXCHANGED WITH A SAME MODEL BUT DIFFERENT LENGTH/POWER LENS DUE TO REFRACTIVE SURPRISE. THIS RESOLVED THE PROBLEM. THE CAUSE OF THE EVENT WAS REPORTED AS UNKNOWN. Manufac…	Lens Exchange	Resolved
https://www.accessdata.fda.gov/scripts/cdrh/cfdocs/cfMAUDE/Detail.CFM?MDRFOI__ID=13115047&pc=QCB	2023826-2021-05021	2021-09-24 04:00:00	Injury	STAAR SURGICAL COMPANY	2021-12-29 05:00:00	QCB	IMPLANTABLE COLLAMER LENS (ICL)	Misfocusing	Blurred Vision	NA	NA	1	Event Description: THE REPORTER INDICATED THAT THE SURGEON IMPLANTED A 12.6MM VTICM5_12.6; -10.50/+0.50/94 (SPHERE/CYLINDER/AXIS) IMPLANTABLE COLLAMER LENS INTO THE PATIENT'S RIGHT EYE (OD) ON (B)(6) 2021. THE PATIENT EXPERIENCED REFRACTIVE SURPRISE. ON (B)(6) 2021 THE LENS WAS EXCHANGED WITH A SAME LENGTH LENS BUT DIFFERENT POWER AND THIS RESOLVED THE PROBLEM. Manufacturer Narrative: H3- DEVICE …	Lens Exchange	Resolved
https://www.accessdata.fda.gov/scripts/cdrh/cfdocs/cfMAUDE/Detail.CFM?MDRFOI__ID=13122738&pc=QCB	2023826-2021-05007	2021-08-11 04:00:00	Injury	STAAR SURGICAL COMPANY	2021-12-30 05:00:00	QCB	IMPLANTABLE COLLAMER LENS (ICL)	Misfocusing	Blurred Vision	N/A	NA	1	Event Description: THE REPORTER INDICATED THE SURGEON IMPLANTED A 12.6MM VTICM5_12.6 IMPLANTABLE COLLAMER LENS, -5.0/+2.0/005 (SPHERE/CYLINDER/AXIS) INTO THE PATIENT'S LEFT EYE (OS) ON (B)(6) 2021. ON (B)(6) 2021 THE LENS WAS EXCHANGED WITH A SAME SIZE, DIFFERENT SPHERE/CYLINDER/AXIS LENS DUE TO REFRACTIVE SURPRISE. THE PROBLEM IS RESOLVED. Manufacturer Narrative: THIS PRODUCT IS MANUFACTURED IN …	Lens Exchange	Resolved
https://www.accessdata.fda.gov/scripts/cdrh/cfdocs/cfMAUDE/Detail.CFM?MDRFOI__ID=13144019&pc=QCB	2023826-2022-00016	2021-12-07 05:00:00	Injury	STAAR SURGICAL COMPANY	2022-01-03 05:00:00	QCB	IMPLANTABLE COLLAMER LENS (ICL)	Misfocusing; Adverse Event Without Identified Device or Use Problem	Blurred Vision	NA	NA	1	Event Description: THE REPORTER INDICATED THAT THE SURGEON IMPLANTED A 13.2MM VTICM5_13.2; -10.50/6.0/074 (SPHERE/CYLINDER/AXIS) IMPLANTABLE COLLAMER LENS INTO THE PATIENT'S EYE. THE PATIENT EXPERIENCED REFRACTIVE SURPRISE. LENS REMAINS IMPLANTED. ATTEMPTS TO OBTAIN ADDITIONAL INFORMATION HAVE NOT BEEN SUCCESSFUL. IF ADDITIONAL INFORMATION IS RECEIVED A SUPPLEMENTAL MEDWATCH REPORT WILL BE SUBMIT…	Lens Repositioning	Resolved
https://www.accessdata.fda.gov/scripts/cdrh/cfdocs/cfMAUDE/Detail.CFM?MDRFOI__ID=13182567&pc=QCB	2023826-2022-00026	NA	Malfunction	STAAR SURGICAL COMPANY	2022-01-06 05:00:00	QCB	IMPLANTABLE COLLAMER LENS (ICL)	Misfocusing	Blurred Vision	N/A	NA	1	Event Description: THE REPORTER INDICATED THAT A 12.6MM VTICMO12.6, -11.5/+3.5/113 (SPHERE/CYLINDER/AXIS) IMPLANTABLE COLLAMER LENS WAS IMPLANTED INTO THE PATIENT'S RIGHT EYE (OD) ON (B)(6) 2021. BLURRED VISION IN THE IMMEDIATE POST-OPERATIVE CONTROL IS REPORTED. REPORTEDLY THE LENS REMAINS IMPLANTED. Manufacturer Narrative: B5- ADDITIONAL INFORMATION: PER THE REPORTER BLURRED VISION IMMEDIATELY …	Lens Retention	Unknown
https://www.accessdata.fda.gov/scripts/cdrh/cfdocs/cfMAUDE/Detail.CFM?MDRFOI__ID=13233320&pc=QCB	2023826-2022-00154	2021-07-02 04:00:00	Injury	STAAR SURGICAL COMPANY	2022-01-11 05:00:00	QCB	IMPLANTABLE COLLAMER LENS (ICL)	Misfocusing	Blurred Vision	NA	NA	1	Event Description: THE REPORTER INDICATED THAT THE SURGEON IMPLANTED A 12.6MM VTICMO12.6; -17.5/1.0/070 (SPHERE/CYLINDER/AXIS) IMPLANTABLE COLLAMER LENS INTO THE PATIENT'S RIGHT EYE (OD) ON (B)(6) 2021. THE PATIENT EXPERIENCED REFRACTIVE SURPRISE. THEN ON (B)(6) 2021 THE LENS WAS EXCHANGED WITH A SAME MODEL/LENGTH BUT DIFFERENT POWER LENS AND THIS RESOLVED THE PROBLEM. THE CAUSE OF THE EVENT WAS …	Lens Exchange	Resolved
https://www.accessdata.fda.gov/scripts/cdrh/cfdocs/cfMAUDE/Detail.CFM?MDRFOI__ID=13233423&pc=QCB	2023826-2022-00153	2021-08-22 04:00:00	Injury	STAAR SURGICAL COMPANY	2022-01-11 05:00:00	QCB	IMPLANTABLE COLLAMER LENS (ICL)	Misfocusing; Inadequacy of Device Shape and/or Size	Blurred Vision	NA	NA	1	Event Description: THE REPORTER INDICATED THAT THE SURGEON IMPLANTED A 12.6MM VTICMO12.6; -12.00/4.0/092 (SPHERE/CYLINDER/AXIS) IMPLANTABLE COLLAMER LENS INTO THE PATIENT'S RIGHT EYE (OD) ON (B)(6)2021. THE PATIENT EXPERIENCED LOW VAULTING AND REFRACTIVE SURPRISE. ON (B)(6) 2021 THE LENS WAS EXPLANTED AND LATER ON THE SAME DATE REPLACED WITH A LONGER LENGTH LENS. THIS RESOLVED THE PROBLEM. THE CA…	Lens Exchange	Resolved
https://www.accessdata.fda.gov/scripts/cdrh/cfdocs/cfMAUDE/Detail.CFM?MDRFOI__ID=13256317&pc=QCB	2023826-2022-00140	2021-11-06 04:00:00	Malfunction	STAAR SURGICAL COMPANY	2022-01-13 05:00:00	QCB	IMPLANTABLE COLLAMER LENS	Misfocusing	Blurred Vision	N/A	NA	1	Event Description: THE REPORTER STATED THAT THE SURGEON IMPLANTED A 12.6MM VTICM5_12.6, -2.0/+3.0/093 (SPHERE/CYLINDER/AXIS) INTO THE PATIENT'S RIGHT EYE (OD) ON (B)(6) 2021. THE SURGEON REPORTS REFRACTIVE SURPRISE AND BLURRED VISION. REPORTEDLY, THE LENS REMAINS IMPLANTED. Manufacturer Narrative: WEIGHT, RACE, ETHNICITY: UNK. PMA/510(K): THIS PRODUCT IS MANUFACTURED IN THE U.S. BUT NOT MARKETED …	Lens Retention	Unknown
https://www.accessdata.fda.gov/scripts/cdrh/cfdocs/cfMAUDE/Detail.CFM?MDRFOI__ID=13256345&pc=QCB	2023826-2022-00139	2022-01-08 05:00:00	Injury	STAAR SURGICAL COMPANY	2022-01-13 05:00:00	QCB	IMPLANTABLE COLLAMER LENS (ICL)	Misfocusing; Device Dislodged or Dislocated	Blurred Vision	N/A	NA	1	Event Description: THE REPORTER INDICATED THAT AN IMPLANTABLE COLLAMER LENS WAS IMPLANTED INTO THE PATIENT'S EYE. THE SURGEON REPORTS AXIAL MISALIGNMENT. IT WAS "CORRECTED" AND THE LENS ROTATED AGAIN. Manufacturer Narrative: H3: DEVICE EVALUATION - LENS WAS RETURNED IN MICROCENTRIFUGE VIAL IN LIQUID. VISUAL INSPECTION FOUND NO VISIBLE DAMAGE TO THE LENS. DIMENSIONAL INSPECTION FOUND THE LENS TO B…	Lens Exchange	Resolved
https://www.accessdata.fda.gov/scripts/cdrh/cfdocs/cfMAUDE/Detail.CFM?MDRFOI__ID=13256368&pc=QCB	2023826-2022-00152	2021-12-20 05:00:00	Injury	STAAR SURGICAL COMPANY	2022-01-13 05:00:00	QCB	IMPLANTABLE COLLAMER LENS (ICL)	Misfocusing	Blurred Vision	N/A	NA	1	Event Description: THE REPORTER INDICATED THAT A 13.2MM VTICMO13.2, -7.0/+4.0/092 (SPHERE/CYLINDER/AXIS) IMPLANTABLE COLLAMER LENS WAS IMPLANTED INTO THE PATIENT'S RIGHT EYE (OD) ON (B)(6) 2021. REFRACTIVE SUPRISE IS REPORTED. THE LENS REMAINS IMPLANTED. Manufacturer Narrative: B5-UPDATED INFORMATION: ON (B)(6) 2022 THE LENS WAS EXPLANTED AND THEN REPLACED WITH A DIFFERENT SPHERE/CYLINDER LENS. T…	Lens Exchange	Resolved
https://www.accessdata.fda.gov/scripts/cdrh/cfdocs/cfMAUDE/Detail.CFM?MDRFOI__ID=13286530&pc=QCB	2023826-2022-00179	2021-12-17 05:00:00	Injury	STAAR SURGICAL COMPANY	2022-01-18 05:00:00	QCB	IMPLANTABLE COLLAMER LENS (ICL)	Misfocusing	Blurred Vision	P030016	NA	1	Event Description: THE REPORTER INDICATED THE SURGEON IMPLANTED A 13.2MM TMICL13.2 IMPLANTABLE COLLAMER LENS, -14.00/+1.0/074 (SPHERE/CYLINDER/AXIS), IN THE PATIENTS RIGHT EYE (OD) ON (B)(6) 2021. THE LENS WAS EXPLANTED ON (B)(6) 2021 DUE TO PATIENT EXPERIENCED A REFRACTIVE SURPRISE (VA WAS 20/400) AND BLURRED VISION. THE LENS WAS REPLACED WITH ANOTHER SAME MODEL/LENGTH BUT DIFFERENT DIOPTER LENS…	Lens Exchange	Resolved
https://www.accessdata.fda.gov/scripts/cdrh/cfdocs/cfMAUDE/Detail.CFM?MDRFOI__ID=13286581&pc=QCB	2023826-2022-00194	2021-07-15 04:00:00	Injury	STAAR SURGICAL COMPANY	2022-01-18 05:00:00	QCB	IMPLANTABLE COLLAMER LENS (ICL)	Misfocusing; Device Dislodged or Dislocated	Blurred Vision	NA	NA	1	Event Description: THE REPORTER INDICATED THAT THE SURGEON IMPLANTED A 12.6MM VTICMO12.6; -18.0/4.0/91 (SPHERE/CYLINDER/AXIS) IMPLANTABLE COLLAMER LENS INTO THE PATIENT'S RIGHT EYE (OD) ON (B)(6) 2021. IT WAS REPORTED THE LENS HAD ROTATED 30 DEGREES COUNTER CLOCKWISE AND THE PATIENT COMPLAINED OF BLURRY VISION. ON (B)(6) 2021 THE LENS WAS EXCHANGED WITH A SAME MODEL/LENGTH LENS AND DIFFERENT AXIS…	Lens Exchange	Resolved
https://www.accessdata.fda.gov/scripts/cdrh/cfdocs/cfMAUDE/Detail.CFM?MDRFOI__ID=13296036&pc=QCB	2023826-2022-00241	2021-10-25 04:00:00	Injury	STAAR SURGICAL COMPANY	2022-01-19 05:00:00	QCB	IMPLANTABLE COLLAMER LENS (ICL)	Misfocusing	Blurred Vision	NA	NA	1	Event Description: THE REPORTER INDICATED THAT THE SURGEON IMPLANTED A 13.2MM VTICMO13.2; -8.00/+1.5/111 (SPHERE/CYLINDER/AXIS) IMPLANTABLE COLLAMER LENS INTO THE PATIENT'S RIGHT EYE (OD) ON (B)(6) 2021. THE PATIENT EXPERIENCED BLURRED VISION AND WAS DISSATISFIED WITH THE QUALITY OF VISION. ON (B)(6) 2021 THE LENS WAS EXPLANTED. ON (B)(6) 2021 A REPLACEMENT LENS OF THE SAME MODEL/LENGTH BUT DIFFE…	Lens Exchange	Resolved
https://www.accessdata.fda.gov/scripts/cdrh/cfdocs/cfMAUDE/Detail.CFM?MDRFOI__ID=13389436&pc=QCB	2023826-2022-00356	2020-09-15 04:00:00	Injury	STAAR SURGICAL COMPANY	2022-01-28 05:00:00	QCB	IMPLANTABLE COLLAMER LENS (ICL)	Misfocusing	Blurred Vision	NA	NA	1	Event Description: THE REPORTER INDICATED THAT THE SURGEON IMPLANTED A 12.6MM VTICMO12.6; -9.0/1.5/2 (SPHERE/CYLINDER/AXIS) IMPLANTABLE COLLAMER LENS INTO THE PATIENT'S LEFT EYE (OS) ON (B)(6)2020. THE PATIENT EXPERIENCED REFRACTIVE SURPRISE. ON (B)(6) 2021, THE LENS WAS EXCHANGED WITH A SAME MODEL/LENGTH BUT DIFFERENT POWER LENS. THIS RESOLVED THE PROBLEM. THE CAUSE OF THE EVENT WAS REPORTED AS …	Lens Exchange	Resolved
https://www.accessdata.fda.gov/scripts/cdrh/cfdocs/cfMAUDE/Detail.CFM?MDRFOI__ID=13389437&pc=QCB	2023826-2022-00355	2020-09-15 04:00:00	Injury	STAAR SURGICAL COMPANY	2022-01-28 05:00:00	QCB	IMPLANTABLE COLLAMER LENS (ICL)	Misfocusing; Off-Label Use	Blurred Vision	NA	NA	1	Event Description: THE REPORTER INDICATED THAT THE SURGEON IMPLANTED A 12.6MM VTICMO12.6; -9.5/1.5/092 (SPHERE/CYLINDER/AXIS) IMPLANTABLE COLLAMER LENS INTO THE PATIENT'S RIGHT EYE (OD) ON (B)(6) 2020. THE PATIENT EXPERIENCED REFRACTIVE SURPRISE. ON (B)(6) 2021 THE LENS WAS EXCHANGED WITH A SAME LENGTH/MODEL BUT DIFFERENT POWER LENS AND THIS RESOLVED THE PROBLEM. THE CAUSE OF THE EVENT WAS REPORT…	Lens Exchange	Resolved
https://www.accessdata.fda.gov/scripts/cdrh/cfdocs/cfMAUDE/Detail.CFM?MDRFOI__ID=13459226&pc=QCB	2023826-2022-00393	2022-01-05 05:00:00	Injury	STAAR SURGICAL COMPANY	2022-02-04 05:00:00	QCB	IMPLANTABLE COLLAMER LENS	Misfocusing	Blurred Vision	N/A	NA	1	Event Description: THE REPORTER STATED THAT THE SURGEON IMPLANTED A 12.6MM VTICMO12.6, -14.5/+5.0/086 (SPHERE/CYLINDER/AXIS) INTO THE PATIENT'S LEFT EYE (OS) ON (B)(6) 2021. THE SURGEON REPORTS REFRACTIVE SURPRISE. REPORTEDLY, LENS REMAINS IMPLANTED. Manufacturer Narrative: B5 - "THE SURGEON REPOSITIONED THE LENS TWO DAYS LATER." SHOULD BE ADDED TO THE INITIAL MDR. H1- CORRECTED TO SERIOUS INJURY…	Lens Retention	Unknown
https://www.accessdata.fda.gov/scripts/cdrh/cfdocs/cfMAUDE/Detail.CFM?MDRFOI__ID=13488089&pc=QCB	2023826-2022-00426	NA	Malfunction	STAAR SURGICAL COMPANY	2022-02-08 05:00:00	QCB	IMPLANTABLE COLLAMER LENS (ICL)	Misfocusing	Blurred Vision	NA	NA	1	Event Description: THE REPORTER INDICATED THAT THE SURGEON IMPLANTED A 13.2MM VTICMO13.2; -4.00/-3.00/88 (SPHERE/CYLINDER/AXIS) IMPLANTABLE COLLAMER LENS INTO THE PATIENT'S LEFT EYE (OS) ON (B)(6) 2021. THE PATIENT EXPERIENCED REFRACTIVE SURPRISE. IT WAS REPORTED A LENS EXCHANGED IS PLANNED TO RESOLVE THE ISSUE. LENS REMAINS IMPLANTED. CAUSE OF THE EVENT WAS REPORTED AS UNKNOWN. IF ADDITIONAL INF…	Lens Retention	Unknown
https://www.accessdata.fda.gov/scripts/cdrh/cfdocs/cfMAUDE/Detail.CFM?MDRFOI__ID=13542049&pc=QCB	2023826-2022-00439	2021-12-13 05:00:00	Injury	STAAR SURGICAL COMPANY	2022-02-16 05:00:00	QCB	IMPLANTABLE COLLAMER LENS (ICL)	Misfocusing	Blurred Vision	N/A	NA	1	Event Description: THE REPORTER INDICATED THAT A 12.1MM, VTICMO 12.1, -17.50/1.0/061 (SPHERE/CYLINDER/AXIS), IMPLANTABLE COLLAMER LENS WAS IMPLANTED INTO THE PATIENT'S LEFT EYE (OS) ON (B)(6) 2021. ON (B)(6) 2021 THE LENS WAS REPLACED WITH A SAME SIZE SPHERICAL LENS LENS DUE TO REFRACTIVE SURPRISE. THE PROBLEM WAS RESOLVED. CAUSE OF THE EVENT IS REPORTED AS UNKNOWN. Manufacturer Narrative: H3- DE…	Lens Exchange	Resolved
https://www.accessdata.fda.gov/scripts/cdrh/cfdocs/cfMAUDE/Detail.CFM?MDRFOI__ID=13588892&pc=QCB	2023826-2022-00599	2017-06-06 04:00:00	Injury	STAAR SURGICAL COMPANY	2022-02-23 05:00:00	QCB	IMPLANTABLE COLLAMER LENS (ICL)	Misfocusing; Off-Label Use	Blurred Vision	P030016	NA	1	Event Description: THE REPORTER INDICATED THAT THE SURGEON IMPLANTED A 12.6MM VTICMO12.6; -13.0/2.0/092 (SPHERE/CYLINDER/AXIS) IMPLANTABLE COLLAMER LENS INTO THE PATIENT'S LEFT EYE (OS) ON (B)(6) 2017. THE PATIENT EXPERIENCED REFRACTIVE SURPRISE AND NOTED "OVER CORRECTION +1.75/0.25/45-0.7. IN A SEPARATE SURGERY THAT SAME DAY, THE LENS WAS EXCHANGED WITH A SAME LENGTH LENS BUT DIFFERENT POWER. TH…	Lens Exchange	Resolved
https://www.accessdata.fda.gov/scripts/cdrh/cfdocs/cfMAUDE/Detail.CFM?MDRFOI__ID=13608356&pc=QCB	2023826-2022-00618	2021-07-28 04:00:00	Malfunction	STAAR SURGICAL COMPANY	2022-02-26 05:00:00	QCB	IMPLANTABLE COLLAMER LENS (ICL)	Misfocusing; Device Dislodged or Dislocated	Blurred Vision	NA	NA	1	Event Description: THE REPORTER INDICATED THAT THE SURGEON IMPLANTED A 13.2MM VTICM5_13.2; -9.5/2.0/89 (SPHERE/CYLINDER/AXIS) IMPLANTABLE COLLAMER LENS INTO THE PATIENT'S RIGHT EYE (OD) ON (B)(6) 2021. IT WAS INDICATED THAT THE PATIENT HAS REFRACTIVE SURPRISE AND THERE ARE "NO ISSUES. VAULT WAS NOT RECORDED ON MOST RECENT VISION; BUT AT A PREVIOUS VISIT IT WAS 3+ ICL THICKNESS; VECTOR ANALYSIS WA…	Lens Retention	Unknown
https://www.accessdata.fda.gov/scripts/cdrh/cfdocs/cfMAUDE/Detail.CFM?MDRFOI__ID=13608364&pc=QCB	2023826-2022-00619	2021-07-28 04:00:00	Malfunction	STAAR SURGICAL COMPANY	2022-02-26 05:00:00	QCB	IMPLANTABLE COLLAMER LENS (ICL)	Misfocusing; Device Dislodged or Dislocated	Blurred Vision	NA	NA	1	Event Description: THE REPORTER INDICATED THAT THE SURGEON IMPLANTED A 12.6MM VTICM5_12.6; -11.5/2.0/91 (SPHERE/CYLINDER/AXIS) IMPLANTABLE COLLAMER LENS INTO THE PATIENT'S LEFT EYE (OS) ON (B)(6) 2021. IT WAS INDICATED THAT THE PATIENT HAS REFRACTIVE SURPRISE AND THERE ARE "NO ISSUES. VAULT WAS NOT RECORDED ON MOST RECENT VISION; BUT AT A PREVIOUS VISIT IT WAS 3+ ICL THICKNESS; VECTOR ANALYSIS WA…	Lens Retention	Unknown
https://www.accessdata.fda.gov/scripts/cdrh/cfdocs/cfMAUDE/Detail.CFM?MDRFOI__ID=13712176&pc=QCB	2023826-2022-00760	2021-11-22 05:00:00	Malfunction	STAAR SURGICAL COMPANY	2022-03-09 05:00:00	QCB	IMPLANTABLE COLLAMER LENS (ICL)	Misfocusing	Blurred Vision	NA	NA	1	Event Description: THE REPORTER INDICATED THAT THE SURGEON IMPLANTED A 12.6MM VTICM5_12.6; -6.5/+4.0/146 (SPHERE/CYLINDER/AXIS) IMPLANTABLE COLLAMER LENS INTO THE PATIENT'S RIGHT EYE (OD) ON (B)(6) 2021. THE PATIENT EXPERIENCED REFRACTIVE SURPRISE. THE LENS REMAINS IMPLANTED. THE CAUSE OF THE EVENT WAS REPORTED AS UNKNOWN. ATTEMPTS TO OBTAIN ADDITIONAL INFORMATION HAVE NOT BEEN SUCCESSFUL. IF ADD…	Lens Retention	Unknown
https://www.accessdata.fda.gov/scripts/cdrh/cfdocs/cfMAUDE/Detail.CFM?MDRFOI__ID=13725581&pc=QCB	2023826-2022-00772	2022-02-16 05:00:00	Injury	STAAR SURGICAL COMPANY	2022-03-10 05:00:00	QCB	IMPLANTABLE COLLAMER LENS (ICL)	Misfocusing; Off-Label Use; Device Dislodged or Dislocated	Blurred Vision	NA	NA	1	Event Description: THE REPORTER INDICATED THAT THE SURGEON IMPLANTED A 13.2MM VTICH13.2; 5.50/3.0/55 (SPHERE/CYLINDER/AXIS) IMPLANTABLE COLLAMER LENS INTO THE PATIENT'S RIGHT EYE (OD) ON (B)(6) 2021. THE PATIENT EXPERIENCED LENS ROTATION AND LOSS OF VISUAL ACUITY WHICH THE SURGEON REPOSITIONED THE LENS ON (B)(6) 2022; BUT THIS DID NOT RESOLVE THE PROBLEM. THEN ON (B)(6) 2022 THE LENS WAS EXCHANGE…	Lens Exchange	Resolved
https://www.accessdata.fda.gov/scripts/cdrh/cfdocs/cfMAUDE/Detail.CFM?MDRFOI__ID=13831254&pc=QCB	2023826-2022-00882	NA	Injury	STAAR SURGICAL COMPANY	2022-03-20 04:00:00	QCB	IMPLANTABLE COLLAMER LENS (ICL)	Device Dislodged or Dislocated	Blurred Vision	NA	NA	1	Event Description: THE REPORTER INDICATED THAT A 12.6MM VTICM5_12.6 IMPLANTABLE COLLAMER LENS, -5.00/1.5/92 (SPHERE/CYLINDER/AXIS), WAS IMPLANTED INTO THE PATIENTS RIGHT EYE (OD) ON (B)(6) 2022 AS A REPLACEMENT LENS TO CORRECT REFRACTIVE SURPRISE BUT IT DID NOT RESOLVE THE PROBLEM, UNAIDED VA RE 6/9+1 WAS REPORTED. LENS ROTATION WAS OBSERVED AT 20 DAYS POST-OP. IT WAS REPORTED THAT LENS REPOSITIO…	Lens Retention	Unknown
https://www.accessdata.fda.gov/scripts/cdrh/cfdocs/cfMAUDE/Detail.CFM?MDRFOI__ID=13872480&pc=QCB	2023826-2022-00903	2021-08-05 04:00:00	Injury	STAAR SURGICAL COMPANY	2022-03-24 04:00:00	QCB	IMPLANTABLE COLLAMER LENS (ICL)	Misfocusing	Blurred Vision	NA	NA	1	Event Description: THE REPORTER INDICATED THAT A 13.2MM VTICMO 13.2 IMPLANTABLE COLLAMER LENS OF -9.5/2.0/088 (SPHERE/CYLINDER/AXIS) WAS IMPLANTED INTO THE PATIENT'S LEFT EYE (OS) ON (B)(6) 2021. ON (B)(6) 2021 THE LENS WAS EXCHANGED FOR A SAME MODEL/SIZE BUT DIFFERENT POWER -10.5/2.0/90 (SPHERE/CYLINDER/AXIS) LENS DUE TO REFRACTIVE SURPRISE. THE EXCHANGE RESOLVED THE PROBLEM. CAUSE IS REPORTED A…	Lens Exchange	Resolved
https://www.accessdata.fda.gov/scripts/cdrh/cfdocs/cfMAUDE/Detail.CFM?MDRFOI__ID=13878813&pc=QCB	2023826-2022-00943	2022-02-07 05:00:00	Injury	STAAR SURGICAL COMPANY	2022-03-24 04:00:00	QCB	IMPLANTABLE COLLAMER LENS (ICL)	Misfocusing	Blurred Vision	NA	NA	1	Event Description: THE REPORTER INDICATED THAT THE SURGEON IMPLANTED A 12.6MM VTICM5_12.6; -8.50/+3.50/77 (SPHERE/ CYLINDER/ AXIS) IMPLANTABLE COLLAMER LENS INTO THE PATIENT'S RIGHT EYE (OD) ON (B)(4) 2022. THE PATIENT EXPERIENCED BLURRED VISION. THEN ON (B)(6) 2022 THE LENS WAS EXPLANTED AND IT WAS NOTED "THERE IS NO PLAN TO IMPLANT OTHER LENS". THIS RESOLVED THE PROBLEM. THE CAUSE OF THE EVENT …	Lens Extraction	Resolved
https://www.accessdata.fda.gov/scripts/cdrh/cfdocs/cfMAUDE/Detail.CFM?MDRFOI__ID=13911552&pc=QCB	2023826-2022-00964	2022-02-25 05:00:00	Malfunction	STAAR SURGICAL COMPANY	2022-03-25 04:00:00	QCB	IMPLANTABLE COLLAMER LENS (ICL)	Misfocusing	Blurred Vision	N/A	NA	1	Event Description: THE REPORTER INDICATED THAT A 13.7MM VTICMO13.7 -7.0/+0.5/051 (SPHERE/CYLINDER/AXIS) IMPLANTABLE COLLAMER LENS WAS IMPLANTED INTO THE PATIENT'S LEFT EYE (OS) ON (B)(6) 2021. REFRACTIVE SUPRISE IS REPORTED. THE LENS REMAINS IMPLANTED. THE CAUSE IS REPORTED AS UNKNOWN. Manufacturer Narrative: H3 - DEVICE EVALUATION: THE LENS WAS RETURNED WITH MOISTURE IN A MICROCENTRIFUGE VIAL. V…	Lens Retention	Unknown
https://www.accessdata.fda.gov/scripts/cdrh/cfdocs/cfMAUDE/Detail.CFM?MDRFOI__ID=13911603&pc=QCB	2023826-2022-00963	2022-02-25 05:00:00	Injury	STAAR SURGICAL COMPANY	2022-03-25 04:00:00	QCB	IMPLANTABLE COLLAMER LENS (ICL)	Misfocusing	Blurred Vision	N/A	NA	1	Event Description: THE REPORTER INDICATED THAT A 13.7MM VTICMO13.7, -6.0/+1.5/004 (SPHERE/CYLINDER/AXIS) IMPLANTABLE COLLAMER LENS WAS IMPLANTED INTO THE PATIENT'S RIGHT EYE (OD) ON (B)(6) 2021. REFRACTIVE SUPRISE IS REPORTED. THE LENS REMAINS IMPLANTED. THE CAUSE IS REPORTED AS UNKNOWN. Manufacturer Narrative: B5 - "ON (B)(6) 2022 THE LENS WAS REPLACED WITH A DIFFERENT MODEL/SAME LENGTH LENS. TH…	Lens Exchange	Resolved
https://www.accessdata.fda.gov/scripts/cdrh/cfdocs/cfMAUDE/Detail.CFM?MDRFOI__ID=13911619&pc=QCB	2023826-2022-00965	2022-01-27 05:00:00	Injury	STAAR SURGICAL COMPANY	2022-03-25 04:00:00	QCB	IMPLANTABLE COLLAMER LENS (ICL)	Misfocusing	Blurred Vision	N/A	NA	1	Event Description: THE REPORTER INDICATED THE SURGEON IMPLANTED A 12.6MM VTICMO12.6 IMPLANTABLE COLLAMER LENS -15.5/+2.5/083 (SPHERE/CYLINDER/AXIS) INTO THE PATIENT'S LEFT EYE (OS) ON (B)(6) 2021. ON (B)(6) 2022 THE LENS WAS EXCHANGED WITH A SAME LENGTH DIFFERENT SPHERE/CYLINDER/AXIS LENS DUE TO REFRACTIVE SURPRISE. THE PROBLEM IS RESOLVED. THE CAUSE OF THE EVENT IS REPORTED AS UNKNOWN. Manufactu…	Lens Exchange	Resolved
https://www.accessdata.fda.gov/scripts/cdrh/cfdocs/cfMAUDE/Detail.CFM?MDRFOI__ID=13932582&pc=QCB	2023826-2022-00948	2021-10-08 04:00:00	Injury	STAAR SURGICAL COMPANY	2022-03-28 04:00:00	QCB	IMPLANTABLE COLLAMER LENS (ICL)	Misfocusing; Off-Label Use	Blurred Vision	NA	NA	1	Event Description: THE REPORTER INDICATED THAT A 12.6MM VTICMO 12.6 IMPLANTABLE COLLAMER LENS OF -16.0/5.0/012 (SPHERE/CYLINDER/AXIS) WAS IMPLANTED INTO THE PATIENT'S LEFT EYE (OS) ON (B)(6) 2021. ON (B)(6)2021 THE LENS WAS REMOVED DUE TO REFRACTIVE SURPRISE. REPORTER STATES " IN THE FIRST POSTOPERATIVE DAY FOLLOWING PHAKIC LENS EXPLANTATION CORNEA AND CRYSTALLINE WERE CLEAR. IT IS EXPECTED THAT …	Lens Extraction	Unknown
https://www.accessdata.fda.gov/scripts/cdrh/cfdocs/cfMAUDE/Detail.CFM?MDRFOI__ID=13997876&pc=QCB	2023826-2022-00836	2021-08-07 04:00:00	Injury	STAAR SURGICAL COMPANY	2022-04-04 04:00:00	QCB	IMPLANTABLE COLLAMER LENS (ICL)	Misfocusing	Blurred Vision	NA	NA	1	Event Description: THE REPORTER INDICATED THAT A 12.6MM VTICM5_12.6 IMPLANTABLE COLLAMER LENS OF -10.00/2.5/095 (SPHERE/CYLINDER/AXIS) WAS IMPLANTED INTO THE PATIENTS LEFT EYE (OS) ON (B)(6) 2021. ON (B)(6) 2021 THE LENS WAS EXCHANGED FOR A SAME SIZE DIFFERENT SPHERE/AXIS LENS DUE TO REFRACTIVE SURPRISE. SEE MFR. REP#2023826-2022-00838 FOR EXCHANGE LENS. Manufacturer Narrative: H3 - DEVICE EVALUA…	Lens Exchange	Unknown
https://www.accessdata.fda.gov/scripts/cdrh/cfdocs/cfMAUDE/Detail.CFM?MDRFOI__ID=13998048&pc=QCB	2023826-2022-00838	NA	Malfunction	STAAR SURGICAL COMPANY	2022-04-04 04:00:00	QCB	IMPLANTABLE COLLAMER LENS (ICL)	Misfocusing	Blurred Vision	NA	NA	1	Event Description: THE REPORTER INDICATED THAT A 12.6MM VTICM5_12.6 IMPLANTABLE COLLAMER LENS OF -11.00/2.5/094 (SPHERE/CYLINDER/AXIS) WAS IMPLANTED INTO THE PATIENTS LEFT EYE (OS) ON (B)(6) 2021 AS A REPLACEMENT LENS. THIS DID NOT RESOLVE REFRACTIVE SURPRISE AND IS UNDER FURTHER OBSERVATION. LENS REMAINS IMPLANTED. Manufacturer Narrative: WEIGHT-RACE: UNK. DATE OF EVENT: UNK. PMA/510(K): THIS PR…	Lens Retention	Unknown
https://www.accessdata.fda.gov/scripts/cdrh/cfdocs/cfMAUDE/Detail.CFM?MDRFOI__ID=14006177&pc=QCB	2023826-2022-01047	NA	Injury	STAAR SURGICAL COMPANY	2022-04-04 04:00:00	QCB	IMPLANTABLE COLLAMER LENS (ICL)	Misfocusing; Device Dislodged or Dislocated	Blurred Vision	NA	NA	1	Event Description: THE REPORTER INDICATED THAT A 13.2MM, VTICMO13.2, -12.50/2.5/060 (SPHERE/CYLINDER/AXIS) IMPLANTABLE COLLAMER LENS WAS IMPLANTED INTO THE PATIENTS LEFT EYE (OS) ON (B)(6) 2022. ON (B)(6) 2022 LENS REPOSITIONING WAS PERFORMED DUE TO REFRACTIVE SURPRISE AND ROTATION. IT WAS REPORTED THAT AT 1-DAY POST-REPOSITIONING THE PATIENT WAS FINE AND FELT BETTER. Manufacturer Narrative: THIS…	Lens Repositioning	Resolved
https://www.accessdata.fda.gov/scripts/cdrh/cfdocs/cfMAUDE/Detail.CFM?MDRFOI__ID=14061348&pc=QCB	2023826-2022-01129	2021-12-02 05:00:00	Injury	STAAR SURGICAL COMPANY	2022-04-08 04:00:00	QCB	IMPLANTABLE COLLAMER LENS (ICL)	Misfocusing; Off-Label Use	Blurred Vision	N/A	NA	1	Event Description: THE REPORTER INDICATED THE SURGEON IMPLANTED A 12.6MM VTICM5_12.6 IMPLANTABLE COLLAMER LENS, -9.5/+1.0/078 (SPHERE/CYLINDER/AXIS) INTO THE PATIENT'S LEFT EYE (OS) ON (B)(6) 2021. ON (B)(6) 2022 THE LENS WAS EXCHANGED WITH A SHORTER LENS DUE TO REFRACTIVE SURPRISE. THE PROBLEM IS RESOLVED. THE CAUSE OF THE EVENT IS REPORTED AS UNKNOWN. Manufacturer Narrative: WEIGHT, ETHNICITY, …	Lens Exchange	Resolved
https://www.accessdata.fda.gov/scripts/cdrh/cfdocs/cfMAUDE/Detail.CFM?MDRFOI__ID=14061353&pc=QCB	2023826-2022-01135	2022-03-10 05:00:00	Injury	STAAR SURGICAL COMPANY	2022-04-08 04:00:00	QCB	IMPLANTABLE COLLAMER LENS (ICL)	Misfocusing; Device Dislodged or Dislocated	Blurred Vision	N/A	NA	1	Event Description: THE REPORTER INDICATED THAT A 12.1MM VTICMO12.1 -14.5/+2.0/074 (SPHERE/CYLINDER/AXIS) IMPLANTABLE COLLAMER LENS WAS IMPLANTED INTO THE PATIENT'S LEFT EYE (OS) ON (B)(6) 2021. REFRACTIVE SUPRISE, BLURRED VISION, AND LENS ROTATION ARE REPORTED. THE LENS REMAINS IMPLANTED. THE CAUSE IS REPORTED AS UNKNOWN. Manufacturer Narrative: B5-ADDITIONAL INFORMATION: THE LENS WAS REPOSITIONE…	Lens Exchange	Resolved
https://www.accessdata.fda.gov/scripts/cdrh/cfdocs/cfMAUDE/Detail.CFM?MDRFOI__ID=14138859&pc=QCB	2023826-2022-01232	2021-07-16 04:00:00	Injury	STAAR SURGICAL COMPANY	2022-04-18 04:00:00	QCB	IMPLANTABLE COLLAMER LENS (ICL)	Misfocusing	Blurred Vision	NA	NA	1	Event Description: THE REPORTER INDICATED THAT A 12.6MM VTICMO12.6 -12.0/6.0/105 (SPHERE/CYLINDER/AXIS) IMPLANTABLE COLLAMER LENS WAS IMPLANTED INTO THE PATIENT'S RIGHT EYE (OD) ON (B)(6) 2021. ON (B)(6) 2021 THE LENS WAS EXCHANGED WITH A NEW MODEL LENS OF DIFFERENT POWER DUE TO REFRACTIVE SURPRISE. THE EXCHANGE RESOLVED THE PROBLEM. CAUSE IS REPORTED AS UNKNOWN. Manufacturer Narrative: PATIENT I…	Lens Exchange	Resolved
https://www.accessdata.fda.gov/scripts/cdrh/cfdocs/cfMAUDE/Detail.CFM?MDRFOI__ID=14145816&pc=QCB	2023826-2022-01204	2022-03-11 05:00:00	Injury	STAAR SURGICAL COMPANY	2022-04-19 04:00:00	QCB	IMPLANTABLE COLLAMER LENS (ICL)	Misfocusing; Device Dislodged or Dislocated	Blurred Vision	NA	NA	1	Event Description: THE REPORTER INDICATED THAT THE SURGEON IMPLANTED A 13.7MM VTICMO13.7 IMPLANTABLE COLLAMER LENS -12.5/+4.5/098 (SPHERE/CYLINDER/AXIS) INTO THE PATIENT'S RIGHT EYE (OD) ON (B)(6)2022. ON (B)(6) 2022 THE LENS WAS REPOSITIONED, THE SURGEON REPORTING LENS ROTATION, REFRACTIVE SURPRISE, AND DROP OF UCVA. REPORTEDLY THE LENS REMAINS IMPLANTED. THE CAUSE OF THE EVENT IS REPORTED AS DE…	Lens Repositioning	Not_Resolved
https://www.accessdata.fda.gov/scripts/cdrh/cfdocs/cfMAUDE/Detail.CFM?MDRFOI__ID=14164530&pc=QCB	2023826-2022-01271	2022-03-09 05:00:00	Injury	STAAR SURGICAL COMPANY	2022-04-20 04:00:00	QCB	IMPLANTABLE COLLAMER LENS (ICL)	Misfocusing; Device Dislodged or Dislocated	Blurred Vision	NA	NA	1	Event Description: THE REPORTER INDICATED THAT A 12.6MM, TMICL12.6, -13.50/4.0/090 (SPHERE/CYLINDER/AXIS) IMPLANTABLE COLLAMER LENS WAS IMPLANTED INTO THE PATIENTS RIGHT EYE (OD) ON (B)(6) 2021. LENS ROTATION NOT ASSOCIATED TO A LOW VAULT AND REFRACTIVE CHANGE OVERTIME WAS OBSERVED. ON (B)(6) 2022 LASIK ENHANCEMENT WAS PERFORMED. ON (B)(6) 2022 THE LENS ROTATED AGAIN, IT WAS REPORTED THAT LENS RE…	Lens Exchange	Unknown
https://www.accessdata.fda.gov/scripts/cdrh/cfdocs/cfMAUDE/Detail.CFM?MDRFOI__ID=14190875&pc=QCB	2023826-2022-01295	2021-12-03 05:00:00	Injury	STAAR SURGICAL COMPANY	2022-04-22 04:00:00	QCB	IMPLANTABLE COLLAMER LENS (ICL)	Misfocusing	Blurred Vision	N/A	NA	1	Event Description: THE REPORTER INDICATED THE SURGEON IMPLANTED A 13.2MM VTICMO13.2 IMPLANTABLE COLLAMER LENS -9.5/+2.5/093 (SPHERE/CYLINDER/AXIS) INTO THE PATIENT'S LEFT EYE (OS) ON (B)(6) 2021. ON (B)(6) 2022 THE LENS WAS EXCHANGED WITH A SAME LENGTH DIFFERENT AXIS LENS DUE TO REFRACTIVE SURPRISE. THE PROBLEM IS RESOLVED. THE CAUSE OF THE EVENT IS REPORTED AS UNKNOWN. Manufacturer Narrative: AD…	Lens Exchange	Resolved
https://www.accessdata.fda.gov/scripts/cdrh/cfdocs/cfMAUDE/Detail.CFM?MDRFOI__ID=14190880&pc=QCB	2023826-2022-01291	2021-09-29 04:00:00	Injury	STAAR SURGICAL COMPANY	2022-04-22 04:00:00	QCB	IMPLANTABLE COLLAMER LENS	Misfocusing; Device Dislodged or Dislocated	Blurred Vision	P030016	NA	1	Event Description: THE REPORTER INDICATED THAT A 13.7MM TMICL13.7 IMPLANTABLE COLLAMER LENS WAS IMPLANTED INTO THE PATIENT'S LEFT (OS) IN (B)(6) 2021. THE SURGEON REPORTS BLURRED VISION AND LENS ROTATION. REPORTEDLY THE LENS WAS REPOSITIONED AND IT ROTATED AGAIN. ATTEMPTS TO OBTAIN ADDITIONAL INFORMATION HAVE NOT BEEN SUCCESSFUL. Manufacturer Narrative: PATIENT IDENTIFIER: UNKNOWN, WEIGHT: UNKNOW…	Lens Retention + Secondary Operation	Resolved
https://www.accessdata.fda.gov/scripts/cdrh/cfdocs/cfMAUDE/Detail.CFM?MDRFOI__ID=14197862&pc=QCB	2023826-2022-01309	2022-02-10 05:00:00	Injury	STAAR SURGICAL COMPANY	2022-04-25 04:00:00	QCB	IMPLANTABLE COLLAMER LENS (ICL)	Misfocusing; Device Dislodged or Dislocated	Blurred Vision	P030016	NA	1	Event Description: THE REPORTER INDICATED THAT THE SURGEON IMPLANTED A 12.6MM TMICL12.6; -12.0/4.0/093 (SPHERE/CYLINDER/AXIS) IMPLANTABLE COLLAMER LENS INTO THE PATIENT'S RIGHT EYE (OD) ON (B)(6) 2021 THE PATIENT EXPERIENCED LENS ROTATION NOT ASSOCIATED WITH LOW VAULT AND BLURRED VISION. ON (B)(6) 2022 THE LENS WAS EXPLANTED AND LATER ON THE SAME DATE A REPLACEMENT LENS OF LONGER LENGTH WAS IMPLA…	Lens Exchange	Resolved
https://www.accessdata.fda.gov/scripts/cdrh/cfdocs/cfMAUDE/Detail.CFM?MDRFOI__ID=14274820&pc=QCB	2023826-2022-01393	2022-03-07 05:00:00	Malfunction	STAAR SURGICAL COMPANY	2022-05-04 04:00:00	QCB	IMPLANTABLE COLLAMER LENS (ICL)	Misfocusing; Inadequacy of Device Shape and/or Size	Blurred Vision	NA	NA	1	Event Description: THE REPORTER INDICATED THAT A 12.6MM VTICMO12.6 IMPLANTABLE COLLAMER LENS OF -11.5/+1.0/177 (SPHERE/CYLINDER/AXIS) WAS IMPLANTED INTO THE PATIENT'S LEFT EYE (OS) ON (B)(6) 2022. EXCESSIVE VAULT AND REFRACTIVE SURPRISE WAS OBSERVED, LENS REMAINS IMPLANTED. DEVICE AND PATIENT-RELATED FACTOR WAS REPORTED AS CAUSE OF EVENT. IF ADDITIONAL INFORMATION IS RECEIVED A SUPPLEMENTAL MEDWA…	Lens Retention	Unknown
https://www.accessdata.fda.gov/scripts/cdrh/cfdocs/cfMAUDE/Detail.CFM?MDRFOI__ID=14274990&pc=QCB	2023826-2022-01392	2022-03-07 05:00:00	Malfunction	STAAR SURGICAL COMPANY	2022-05-04 04:00:00	QCB	IMPLANTABLE COLLAMER LENS (ICL)	Misfocusing; Inadequacy of Device Shape and/or Size	Blurred Vision	NA	NA	1	Event Description: THE REPORTER INDICATED THAT A 12.6MM VTICMO12.6 IMPLANTABLE COLLAMER LENS OF -15.5/+1.5/157 (SPHERE/CYLINDER/AXIS) WAS IMPLANTED INTO THE PATIENT'S RIGHT EYE (OD) ON (B)(6) 2022. EXCESSIVE VAULT AND REFRACTIVE SURPRISE WAS OBSERVED, LENS REMAINS IMPLANTED. DEVICE AND PATIENT-RELATED FACTOR WAS REPORTED AS CAUSE OF EVENT. THE REPORTER STATED "REGARDING THE REFRACTIVE ERROR, HER …	Lens Retention	Unknown
https://www.accessdata.fda.gov/scripts/cdrh/cfdocs/cfMAUDE/Detail.CFM?MDRFOI__ID=14288001&pc=QCB	2023826-2022-01302	2022-03-05 05:00:00	Injury	STAAR SURGICAL COMPANY	2022-05-05 04:00:00	QCB	IMPLANTABLE COLLAMER LENS (ICL)	Misfocusing; Device Dislodged or Dislocated	Blurred Vision	NA	NA	1	Event Description: THE REPORTER INDICATED THE SURGEON IMPLANTED A 12.6MM VTICM5_12.6 IMPLANTABLE COLLAMER LENS, -05.50/+1.5/096 (SPHERE/CYLINDER/AXIS), IN THE PATIENTS RIGHT EYE (OD), ON (B)(6) 2022. THE LENS WAS EXPLANTED ON (B)(6) 2022 DUE TO THE LENS ROTATED. THE PATIENT EXPERIENCED BLURRED VISION. THE LENS WAS REPOSITIONED ON (B)(6) 2022 BUT THE PROBLEM WAS NOT RESOLVED. THE LENS WAS REPLACED…	Lens Exchange	Resolved
https://www.accessdata.fda.gov/scripts/cdrh/cfdocs/cfMAUDE/Detail.CFM?MDRFOI__ID=14311898&pc=QCB	2023826-2022-01242	2022-01-04 05:00:00	Injury	STAAR SURGICAL COMPANY	2022-05-06 04:00:00	QCB	IMPLANTABLE COLLAMER LENS (ICL)	Misfocusing	Blurred Vision	NA	NA	1	Event Description: THE REPORTER INDICATED THAT A 12.1MM VTICMO12.1 -17.5/2.0/071 (SPHERE/CYLINDER/AXIS) IMPLANTABLE COLLAMER LENS WAS IMPLANTED INTO THE PATIENT'S RIGHT EYE (OD) ON (B)(6) 2021. ON (B)(6) 2022 THE LENS WAS EXCHANGED WITH A NEW MODEL LENS OF DIFFERENT DIOPTER DUE TO REFRACTIVE SURPRISE. THE EXCHANGE RESOLVED THE PROBLEM. CAUSE IS REPORTED AS UNKNOWN. Manufacturer Narrative: PT INFO…	Lens Exchange	Resolved
https://www.accessdata.fda.gov/scripts/cdrh/cfdocs/cfMAUDE/Detail.CFM?MDRFOI__ID=14342556&pc=QCB	2023826-2022-01475	2022-03-03 05:00:00	Injury	STAAR SURGICAL COMPANY	2022-05-09 04:00:00	QCB	IMPLANTABLE COLLAMER LENS (ICL)	Misfocusing; Inadequacy of Device Shape and/or Size	Blurred Vision	P030016	NA	1	Event Description: THE REPORTER INDICATED THAT THE SURGEON IMPLANTED A 12.6MM VTICM5_12.6; -3.5/+1.0/075 (SPHERE/CYLINDER/AXIS) IMPLANTABLE COLLAMER LENS INTO THE PATIENT'S LEFT EYE (OS) ON (B)(6) 2018. THE PATIENT NOW HAS LOW VAULTING AND REFRACTIVE CHANGE OVER TIME. LENS REMAINS IMPLANTED. THE CAUSE OF THE EVENT WAS REPORTED AS UNKNOWN. Manufacturer Narrative: DEVICE EVALUATION: LENS WAS RETURN…	Lens Exchange	Not_Resolved
https://www.accessdata.fda.gov/scripts/cdrh/cfdocs/cfMAUDE/Detail.CFM?MDRFOI__ID=14342603&pc=QCB	2023826-2022-01474	2022-03-03 05:00:00	Injury	STAAR SURGICAL COMPANY	2022-05-09 04:00:00	QCB	IMPLANTABLE COLLAMER LENS (ICL)	Misfocusing; Inadequacy of Device Shape and/or Size	Blurred Vision	P030016	NA	1	Event Description: THE REPORTER INDICATED THAT THE SURGEON IMPLANTED A 12.6MM VTICM5_12.6; -3.50/+1.0/098 (SPHERE/CYLINDER/AXIS) IMPLANTABLE COLLAMER LENS INTO THE PATIENT'S RIGHT EYE (OD) ON (B)(6) 2018. THE PATIENT NOW HAS LOW VAULTING AND REFRACTIVE CHANGE OVER TIME. LENS REMAINS IMPLANTED. THE CAUSE OF THE EVENT WAS REPORTED AS UNKNOWN. Manufacturer Narrative: H3 - DEVICE EVALUATION: LENS WAS…	Lens Exchange	Not_Resolved
https://www.accessdata.fda.gov/scripts/cdrh/cfdocs/cfMAUDE/Detail.CFM?MDRFOI__ID=14439265&pc=QCB	2023826-2022-01369	2021-09-10 04:00:00	Injury	STAAR SURGICAL COMPANY	2022-05-19 04:00:00	QCB	IMPLANTABLE COLLAMER LENS (ICL)	Misfocusing	Blurred Vision	NA	NA	1	Event Description: THE REPORTER INDICATED THAT A 12.6MM VTICM5_12.6 -6.50/1.0/092 (SPHERE/CYLINDER/AXIS) IMPLANTABLE COLLAMER LENS WAS IMPLANTED INTO THE PATIENT'S RIGHT EYE (OD) ON (B)(6) 2021. ON (B)(6) 2022 THE LENS WAS EXCHANGED WITH A LENS OF DIFFERENT DIOPTER DUE TO REFRACTIVE SURPRISE. THE EXCHANGE RESOLVED THE PROBLEM. CAUSE IS REPORTED AS UNKNOWN. Manufacturer Narrative: THIS PRODUCT IS …	Lens Exchange	Resolved
https://www.accessdata.fda.gov/scripts/cdrh/cfdocs/cfMAUDE/Detail.CFM?MDRFOI__ID=14440972&pc=QCB	2023826-2022-01603	2022-01-19 05:00:00	Injury	STAAR SURGICAL COMPANY	2022-05-19 04:00:00	QCB	IMPLANTABLE COLLAMER LENS (ICL)	Misfocusing; Off-Label Use	Blurred Vision	P030016	NA	1	Event Description: BS THE REPORTER INDICATED THAT A 12.6MM VTICMO 12.6 IMPLANTABLE COLLAMER LENS OF -8.0/1.5/091 (SPHERE/CYLINDER/AXIS) WAS IMPLANTED INTO THE PATIENTS LEFT EYE (OS) ON 31-DEC-2021. ON 26-MAR-2022 THE LENS WAS EXCHANGED FOR A SHORTER LENGTH LENS DUE TO EXCESSIVE VAULT AND REFRACTIVE SURPRISE. THE EXCHANGE RESOLVED THE PROBLEM. CAUSE REPORTED AS UNKNOWN. Manufacturer Narrative: H3:…	Lens Exchange	Resolved
https://www.accessdata.fda.gov/scripts/cdrh/cfdocs/cfMAUDE/Detail.CFM?MDRFOI__ID=14466440&pc=QCB	2023826-2022-01379	2022-04-19 04:00:00	Injury	STAAR SURGICAL COMPANY	2022-05-21 04:00:00	QCB	IMPLANTABLE COLLAMER LENS (ICL)	Misfocusing	Blurred Vision	P030016	NA	1	Event Description: THE REPORTER INDICATED THAT A 13.7MM VTICM5_13.7 -8.50/1.5/089 (SPHERE/CYLINDER/AXIS) IMPLANTABLE COLLAMER LENS WAS IMPLANTED INTO THE PATIENT'S RIGHT EYE (OD) ON (B)(6) 2021. REFRACTIVE SURPRISE WAS OBSERVED. LENS REMAINS IMPLANTED. CAUSE IS REPORTED AS UNKNOWN. Manufacturer Narrative: B5: THE REPORTER INDICATED THAT A 13.7MM VTICM5_13.7 -8.50/1.5/089 (SPHERE/CYLINDER/AXIS) IM…	Lens Exchange	Resolved
https://www.accessdata.fda.gov/scripts/cdrh/cfdocs/cfMAUDE/Detail.CFM?MDRFOI__ID=14493479&pc=QCB	2023826-2022-01685	NA	Malfunction	STAAR SURGICAL COMPANY	2022-05-25 04:00:00	QCB	IMPLANTABLE COLLAMER LENS (ICL)	Misfocusing	Blurred Vision	P030016	NA	1	Event Description: THE REPORTER INDICATED THAT THE SURGEON IMPLANTED A 12.6MM VTICM5_12.6; -2.00/4.5/112 (SPHERE/CYLINDER/AXIS) IMPLANTABLE COLLAMER LENS INTO THE PATIENT'S RIGHT EYE (OD). THE SURGEON REPORTS REFRACTIVE SURPRISE. LENS REMAINS IMPLANTED. ATTEMPTS TO OBTAIN ADDITIONAL INFORMATION HAVE NOT BEEN SUCCESSFUL. IF ADDITIONAL INFORMATION IS RECEIVED A SUPPLEMENTAL MEDWATCH REPORT WILL BE …	Lens Retention	Unknown
https://www.accessdata.fda.gov/scripts/cdrh/cfdocs/cfMAUDE/Detail.CFM?MDRFOI__ID=14493491&pc=QCB	2023826-2022-01686	NA	Malfunction	STAAR SURGICAL COMPANY	2022-05-25 04:00:00	QCB	IMPLANTABLE COLLAMER LENS (ICL)	Misfocusing	Blurred Vision	P030016	NA	1	Event Description: THE REPORTER INDICATED THAT THE SURGEON IMPLANTED A 12.6MM VTICM5_12.6; -1.50/4.00/68 (SPHERE/CYLINDER/AXIS) IMPLANTABLE COLLAMER LENS INTO THE PATIENT'S LEFT EYE (OS) ON (B)(6) 2022. THE SURGEON REPORTS REFRACTIVE SURPRISE. LENS REMAINS IMPLANTED. CAUSE OF THE EVENT WAS REPORTED AS OTHER. ATTEMPTS TO OBTAIN ADDITIONAL INFORMATION HAVE NOT BEEN SUCCESSFUL. IF ADDITIONAL INFORMA…	Lens Retention	Unknown
https://www.accessdata.fda.gov/scripts/cdrh/cfdocs/cfMAUDE/Detail.CFM?MDRFOI__ID=14523289&pc=QCB	2023826-2022-01699	NA	Malfunction	STAAR SURGICAL COMPANY	2022-05-27 04:00:00	QCB	IMPLANTABLE COLLAMER LENS (ICL)	Misfocusing	Blurred Vision	P030016	NA	1	Event Description: THE REPORTER INDICATED THAT A 12.6MM, TMICL12.6, -15.0/2.0/098 (SPHERE/CYLINDER/AXIS) IMPLANTABLE COLLAMER LENS WAS IMPLANTED INTO THE PATIENTS RIGHT EYE (OD) ON (B)(6) 2022 AS A REPLACEMENT LENS TO ADDRESS EXCESSIVE VAULT AND BLURRED VISION. IT WAS REPORTED THAT BLURRY VISION WAS STILL PRESENT AFTER IMPLANTATION OF THIS REPLACEMENT LENS. THE REPORTER STATED, "WILL CONTINUE TO …	Lens Retention	Unknown
https://www.accessdata.fda.gov/scripts/cdrh/cfdocs/cfMAUDE/Detail.CFM?MDRFOI__ID=14570417&pc=QCB	2023826-2022-01761	2021-08-05 04:00:00	Injury	STAAR SURGICAL COMPANY	2022-06-01 04:00:00	QCB	IMPLANTABLE COLLAMER LENS (ICL)	Misfocusing	Blurred Vision	P030016	NA	1	Event Description: THE REPORTER INDICATED THAT THE SURGEON IMPLANTED A 12.6MM VTICMO12.6; -11.0/1.5/113 (SPHERE/CYLINDER/AXIS) IMPLANTABLE COLLAMER LENS INTO THE PATIENT'S RIGHT EYE (OD) ON (B)(6) 2021. THE PATIENT EXPERIENCED REFRACTIVE SURPRISE AND ON (B)(6) 2022; THE SURGEON EXCHANGED THE LENS WITH A SAME LENGTH/MODEL BUT DIFFERENT POWER LENS AND THIS RESOLVED THE PROBLEM. IT WAS NOTED "DUE TO…	Lens Exchange	Resolved
https://www.accessdata.fda.gov/scripts/cdrh/cfdocs/cfMAUDE/Detail.CFM?MDRFOI__ID=14605631&pc=QCB	2023826-2022-01800	2021-11-26 05:00:00	Injury	STAAR SURGICAL COMPANY	2022-06-06 04:00:00	QCB	IMPLANTABLE COLLAMER LENS (ICL)	Misfocusing	Blurred Vision	P030016	NA	1	Event Description: THE REPORTER INDICATED THAT THE SURGEON IMPLANTED A 12.6MM VTICM5_12.6; -1.00/+2.50/55 (SPHERE/CYLINDER/AXIS) IMPLANTABLE COLLAMER LENS INTO THE PATIENT'S RIGHT EYE (OD) ON (B)(6) 2021. THE PATIENT EXPERIENCED REFRACTIVE SURPRISE. ON (B)(6) 2021 THE LENS WAS EXPLANTED AND THIS RESOLVED THE PROBLEM. THE CAUSE OF THE EVENT WAS REPORTED AS THE DEVICE AND NOTED "APPEARANCE IS THAT …	Lens Extraction	Resolved
https://www.accessdata.fda.gov/scripts/cdrh/cfdocs/cfMAUDE/Detail.CFM?MDRFOI__ID=14650054&pc=QCB	2023826-2022-01838	2021-05-09 04:00:00	Injury	STAAR SURGICAL COMPANY	2022-06-09 04:00:00	QCB	IMPLANTABLE COLLAMER LENS (ICL)	Misfocusing	Blurred Vision	P030016	NA	1	Event Description: THE REPORTER INDICATED THAT THE SURGEON IMPLANTED A 13.2MM VTICMO13.2; -3.0/1.0/94 (SPHERE/CYLINDER/AXIS) IMPLANTABLE COLLAMER LENS INTO THE PATIENT'S LEFT EYE (OS) ON (B)(6) 2021. THE PATIENT EXPERIENCED REFRACTIVE SURPRISE. ON (B)(6) 2022 THE LENS WAS EXCHANGED WITH A SAME MODEL/LENGTH LENS BUT DIFFERENT POWER. THIS RESOLVED THE PROBLEM. THE CAUSE OF THE EVENT WAS REPORTED AS…	Lens Exchange	Resolved
https://www.accessdata.fda.gov/scripts/cdrh/cfdocs/cfMAUDE/Detail.CFM?MDRFOI__ID=14650083&pc=QCB	2023826-2022-01837	NA	Malfunction	STAAR SURGICAL COMPANY	2022-06-09 04:00:00	QCB	IMPLANTABLE COLLAMER LENS (ICL)	Misfocusing	Blurred Vision	P030016	NA	1	Event Description: THE REPORTER INDICATED THAT THE SURGEON IMPLANTED A 13.2MM VTICMO13.2; -14.50/+5.0/127 (SPHERE/CYLINDER/AXIS) IMPLANTABLE COLLAMER LENS INTO THE PATIENT'S RIGHT EYE (OD) ON (B)(6) 2022. THE PATIENT EXPERIENCED REFRACTIVE SURPRISE. LENS REMAINS IMPLANTED. ATTEMPTS TO OBTAIN ADDITIONAL INFORMATION HAVE NOT BEEN SUCCESSFUL. IF ADDITIONAL INFORMATION IS RECEIVED A SUPPLEMENTAL MEDW…	Lens Retention	Unknown
https://www.accessdata.fda.gov/scripts/cdrh/cfdocs/cfMAUDE/Detail.CFM?MDRFOI__ID=14706977&pc=QCB	2023826-2022-01750	2004-03-25 05:00:00	Malfunction	STAAR SURGICAL COMPANY	2022-06-15 04:00:00	QCB	IMPLANTABLE COLLAMER LENS (ICL)	Misfocusing	Blurred Vision	NA	NA	1	Event Description: THE REPORTER INDICATED THAT A 12.5MM TICM12.5 -13.0/1.2/064 IMPLANTABLE COLLAMER LENS WAS IMPLANTED INTO THE PATIENT'S RIGHT EYE (OD) ON (B)(6) 2004. REFRACTIVE CHANGE OVERTIME WAS REPORTED. THE LENS REMAINS IMPLANTED. CAUSE IS REPORTED AS UNKNOWN. Manufacturer Narrative: AGE OR DATE OF BIRTH, WEIGHT-RACE:UNK. DATE OF EVENT: UNK CLAIM#: (B)(4).	Lens Retention	Unknown
https://www.accessdata.fda.gov/scripts/cdrh/cfdocs/cfMAUDE/Detail.CFM?MDRFOI__ID=14707086&pc=QCB	2023826-2022-01888	2022-05-17 04:00:00	Injury	STAAR SURGICAL COMPANY	2022-06-15 04:00:00	QCB	IMPLANTABLE COLLAMER LENS (ICL)	Misfocusing	Blurred Vision	P030016	NA	1	Event Description: THE REPORTER INDICATED THAT THE SURGEON IMPLANTED A 13.2MM VTICM5_13.2; -5.50/+5.50/070 (SPHERE/CYLINDER/AXIS) IMPLANTABLE COLLAMER LENS INTO THE PATIENT'S RIGHT EYE (OD) ON (B)(6) 2022. THE PATIENT HAS REFRACTIVE SURPRISE. LENS REMAINS IMPLANTED. THE CAUSE OF THE EVENT WAS REPORTED AS UNKNOWN. ATTEMPTS TO OBTAIN ADDITIONAL INFORMATION HAVE NOT BEEN SUCCESSFUL. IF ADDITIONAL IN…	Lens Repositioning	Resolved
https://www.accessdata.fda.gov/scripts/cdrh/cfdocs/cfMAUDE/Detail.CFM?MDRFOI__ID=14707407&pc=QCB	2023826-2022-01863	2021-12-02 05:00:00	Malfunction	STAAR SURGICAL COMPANY	2022-06-15 04:00:00	QCB	IMPLANTABLE COLLAMER LENS (ICL)	Inadequacy of Device Shape and/or Size; Device Dislodged or Dislocated	Blurred Vision	P030016	NA	1	Event Description: THE REPORTER INDICATED THAT A 13.2MM VTICMO13.2 IMPLANTABLE COLLAMER LENS OF -15.0/1.0/091 (SPHERE/CYLINDER/AXIS) WAS IMPLANTED INTO THE PATIENT'S LEFT EYE (OS) ON (B)(6) 2021. LOW VAULT WITH ROTATION WAS OBSERVED, LENS REMAINS IMPLANTED. IN THE REPORTERS OPINION THE CAUSE OF EVENT WAS THE DEVICE. FOR CAUSE DETAILS THE REPORTER STATED " THE TORIC LENS IS CONTINUOUSLY ROTATING W…	Lens Retention	Unknown
https://www.accessdata.fda.gov/scripts/cdrh/cfdocs/cfMAUDE/Detail.CFM?MDRFOI__ID=14862313&pc=QCB	2023826-2022-02092	2022-04-21 04:00:00	Injury	STAAR SURGICAL COMPANY	2022-06-29 04:00:00	QCB	IMPLANTABLE COLLAMER LENS (ICL)	Misfocusing	Blurred Vision	P030016	NA	1	Event Description: THE REPORTER INDICATED THAT THE SURGEON IMPLANTED A 13.2MM VTICMO13.2; -15.5/2.5/170 (SPHERE/CYLINDER/AXIS) IMPLANTABLE COLLAMER LENS INTO THE PATIENT'S LEFT EYE (OS) ON (B)(6) 2021. THE PATIENT EXPERIENCED REFRACTIVE SURPRISE. ON (B)(6) 2022 THE LENS WAS EXCHANGED WITH A SAME LENGTH/MODEL BUT DIFFERENT POWER LENS AND THIS RESOLVED THE PROBLEM. THE CAUSE OF THE EVENT WAS REPORT…	Lens Exchange	Resolved
https://www.accessdata.fda.gov/scripts/cdrh/cfdocs/cfMAUDE/Detail.CFM?MDRFOI__ID=14862676&pc=QCB	2023826-2022-01908	2022-04-27 04:00:00	Injury	STAAR SURGICAL COMPANY	2022-06-29 04:00:00	QCB	IMPLANTABLE COLLAMER LENS (ICL)	Misfocusing; Unintended Movement	Blurred Vision	P030016	NA	1	Event Description: THE REPORTER INDICATED THAT A 13.2MM TMICL13.2 -5.5/1.0/066 (SPHERE/CYLINDER/AXIS) IMPLANTABLE COLLAMER LENS WAS IMPLANTED UPSIDE DOWN INTO THE PATIENT'S RIGHT EYE (OD) ON (B)(6) 2022. REFRACTIVE SURPRISE WAS REPORTED. ON (B)(6) 2022 THE LENS WAS EXPLANTED. ON THE SAME DAY IN A SEPARATE SURGERY A BACKUP LENS OF DIFFERENT AXIS WAS IMPLANTED. THE EXCHANGE RESOLVED THE PROBLEM. CA…	Lens Exchange	Not_Resolved
https://www.accessdata.fda.gov/scripts/cdrh/cfdocs/cfMAUDE/Detail.CFM?MDRFOI__ID=14885725&pc=QCB	2023826-2022-02095	NA	Malfunction	STAAR SURGICAL COMPANY	2022-07-01 04:00:00	QCB	IMPLANTABLE COLLAMER LENS (ICL)	Misfocusing; Device Dislodged or Dislocated	Blurred Vision	P030016	NA	1	Event Description: THE REPORTER INDICATED THAT A 12.6MM VTICM5_12.6 IMPLANTABLE COLLAMER LENS OF -8.5/1.0/54 (SPHERE/CYLINDER/AXIS) WAS IMPLANTED INTO THE PATIENT'S LEFT EYE (OS) ON (B)(6) 2022. THE PATIENT EXPERIENCED LENS ROTATION AND REFRACTIVE SURPRISE, LENS REMAINS IMPLANTED. IF ADDITIONAL INFORMATION IS RECEIVED A SUPPLEMENTAL MEDWATCH REPORT WILL BE SUBMITTED. Manufacturer Narrative: ADDIT…	Lens Exchange	Resolved
https://www.accessdata.fda.gov/scripts/cdrh/cfdocs/cfMAUDE/Detail.CFM?MDRFOI__ID=15010429&pc=QCB	2023826-2022-02233	2020-08-18 04:00:00	Injury	STAAR SURGICAL COMPANY	2022-07-14 04:00:00	QCB	IMPLANTABLE COLLAMER LENS (ICL)	Misfocusing	Blurred Vision	P030016	NA	1	Event Description: THE REPORTER INDICATED THAT A 13.2MM VTICMO13.2 IMPLANTABLE COLLAMER LENS OF -6.5/0.5/080 (SPHERE/CYLINDER/AXIS) WAS IMPLANTED INTO THE PATIENT'S LEFT EYE (OS) ON (B)(6) 2020. ON (B)(6) 2020 THE LENS WAS EXCHANGED FOR A DIFFERENT POWER LENS DUE TO REFRACTIVE SURPRISE. THE EXCHANGE RESOLVED THE PROBLEM. CAUSE OF EVENT WAS UNKNOWN. Manufacturer Narrative: H3: DEVICE EVALUATION: T…	Lens Exchange	Resolved
https://www.accessdata.fda.gov/scripts/cdrh/cfdocs/cfMAUDE/Detail.CFM?MDRFOI__ID=15017540&pc=QCB	2023826-2022-02026	NA	Malfunction	STAAR SURGICAL COMPANY	2022-07-14 04:00:00	QCB	IMPLANTABLE COLLAMER LENS (ICL)	Misfocusing	Blurred Vision	NA	NA	1	Event Description: THE REPORTER INDICATED THAT A 12.0MM TICM12.0 -15.0/2.0/122 IMPLANTABLE COLLAMER LENS WAS IMPLANTED INTO THE PATIENT'S RIGHT EYE (OD) ON (B)(6) 2008. REFRACTIVE CHANGE OVERTIME AND PROGRESSION OF MYOPIA WAS REPORTED. THE LENS REMAINS IMPLANTED. Manufacturer Narrative: (B)(4).	Lens Retention	Unknown
https://www.accessdata.fda.gov/scripts/cdrh/cfdocs/cfMAUDE/Detail.CFM?MDRFOI__ID=15022376&pc=QCB	2023826-2022-02270	2021-12-01 05:00:00	Injury	STAAR SURGICAL COMPANY	2022-07-14 04:00:00	QCB	IMPLANTABLE COLLAMER LENS (ICL)	Misfocusing	Blurred Vision	P030016	NA	1	Event Description: THE REPORTER INDICATED THAT A 13.7 VTICMO 13.7 IMPLANTABLE COLLAMER LENS OF -10.0/1.0/093 (SPHERE/CYLINDER/AXIS) WAS IMPLANTED INTO THE PATIENT'S LEFT EYE (OS) ON (B)(6) 2021. REFRACTIVE SURPRISE WAS OBSERVED. ON (B)(6) 2021 THE LENS WAS EXCHANGED FOR A SAME MODEL AND SIZE BUT DIFFERENT POWER. THE EXCHANGE LENS RESOLVED THE PROBLEM. CAUSE REPORTED AS UNKNOWN. Manufacturer Narra…	Lens Exchange	Resolved
https://www.accessdata.fda.gov/scripts/cdrh/cfdocs/cfMAUDE/Detail.CFM?MDRFOI__ID=15097257&pc=QCB	2023826-2022-02279	NA	Injury	STAAR SURGICAL COMPANY	2022-07-25 04:00:00	QCB	IMPLANTABLE COLLAMER LENS (ICL)	Misfocusing	Blurred Vision	P030016	NA	1	Event Description: THE REPORTER INDICATED THAT A 12.6MM TMICL 12.6 IMPLANTABLE COLLAMER LENS OF -12.5/3.5/082 (SPHERE/CYLINDER/AXIS) WAS IMPLANTED INTO THE PATIENTS LEFT EYE (OS) ON (B)(6) 2021. THE INITIAL LENS WAS EXPLANTED AND A REPLACEMENT LENS OF SAME MODEL/SIZE AND DIFFERENT POWER WAS IMPLANTED DUE TO REFRACTIVE SURPRISE. THE CAUSE IS REPORTED AS DEVICE "MISMARKED LENS RESULTED IN REFRACTIV…	Lens Exchange	Unknown
https://www.accessdata.fda.gov/scripts/cdrh/cfdocs/cfMAUDE/Detail.CFM?MDRFOI__ID=15102877&pc=QCB	2023826-2022-02436	2021-12-29 05:00:00	Injury	STAAR SURGICAL COMPANY	2022-07-26 04:00:00	QCB	IMPLANTABLE COLLAMER LENS (ICL)	Misfocusing; Inadequacy of Device Shape and/or Size	Blurred Vision	P030016	NA	1	Event Description: THE REPORTER INDICATED THAT A 13.2MM VTICMO13.2 -17.0/1.5/119 (SPHERE/CYLINDER/AXIS) IMPLANTABLE COLLAMER LENS WAS IMPLANTED INTO THE PATIENT'S RIGHT EYE (OD) ON (B)(6) 2021. ON (B)(6) 2022 THE LENS WAS EXCHANGED FOR A SHORTER LENGTH AND DIFFERENT POWER LENS DUE TO EXCESSIVE VAULT AND REFRACTIVE SURPRISE. THE EXCHANGE RESOLVED THE PROBLEM. CAUSE OF EVENT REPORTED AS UNKNOWN. Ma…	Lens Exchange	Resolved
https://www.accessdata.fda.gov/scripts/cdrh/cfdocs/cfMAUDE/Detail.CFM?MDRFOI__ID=15103623&pc=QCB	2023826-2022-02448	2022-02-25 05:00:00	Injury	STAAR SURGICAL COMPANY	2022-07-26 04:00:00	QCB	IMPLANTABLE COLLAMER LENS (ICL)	Misfocusing; Off-Label Use; Inadequacy of Device Shape and/or Size	Blurred Vision	P030016	NA	1	Event Description: THE REPORTER INDICATED THAT A 12.6MM VTICMO12.6 -10.5/1.0/080 (SPHERE/CYLINDER/AXIS) IMPLANTABLE COLLAMER LENS WAS IMPLANTED INTO THE PATIENT'S RIGHT EYE (OD) ON (B)(6) 2019. ON (B)(6) 2022 THE LENS WAS EXCHANGED FOR A LONGER LENGTH AND DIFFERENT POWER LENS DUE TO LOW VAULT AND REFRACTIVE CHANGE OVERTIME. THE EXCHANGE RESOLVED THE PROBLEM. CAUSE OF EVENT REPORTED AS UNKNOWN. Ma…	Lens Exchange	Resolved
https://www.accessdata.fda.gov/scripts/cdrh/cfdocs/cfMAUDE/Detail.CFM?MDRFOI__ID=15118601&pc=QCB	2023826-2022-02443	2022-06-28 04:00:00	Injury	STAAR SURGICAL COMPANY	2022-07-28 04:00:00	QCB	IMPLANTABLE COLLAMER LENS (ICL)	Misfocusing	Blurred Vision	P030016	NA	1	Event Description: THE REPORTER INDICATED THAT A 13.2M VTICM5_13.2 IMPLANTABLE COLLAMER LENS OF -8.0/+1.0/087 (SPHERE/CYLINDER/AXIS) WAS IMPLANTED INTO THE PATIENT'S RIGHT EYE (OD) ON (B)(6) 2022 . THE PATIENT EXPERIENCED REFRACTIVE SURPRISE, LENS REMAINS IMPLANTED. IN THE REPORTERS OPINION THE CASUSE OF THE EVENT WAS USER ERROR. FOR CAUSE DETAILS THE REPORTER STATED " SUMM UP OF MANY FACTORES: E…	Lens Exchange	Resolved
https://www.accessdata.fda.gov/scripts/cdrh/cfdocs/cfMAUDE/Detail.CFM?MDRFOI__ID=15118602&pc=QCB	2023826-2022-02445	2022-02-09 05:00:00	Injury	STAAR SURGICAL COMPANY	2022-07-28 04:00:00	QCB	IMPLANTABLE COLLAMER LENS (ICL)	Misfocusing	Blurred Vision	P030016	NA	1	Event Description: THE REPORTER INDICATED THAT A 12.6M VTICMO12.6 IMPLANTABLE COLLAMER LENS OF -8.0/1.5/093 (SPHERE/CYLINDER/AXIS) WAS IMPLANTED INTO THE PATIENT'S LEFT EYE (OS) ON (B)(6) 2022. ON (B)(6) 2022 THE LENS WAS EXCHANGED FOR A DIFFERENT CYLINDER AND AXIS LENS DUE TO REFRACTIVE SURPRISE. THE EXCHANGE RESOLVED THE PROBLEM. CAUSE OF EVENT WAS REPORTED AS UNKNOWN. Manufacturer Narrative: D…	Lens Exchange	Resolved
https://www.accessdata.fda.gov/scripts/cdrh/cfdocs/cfMAUDE/Detail.CFM?MDRFOI__ID=15118603&pc=QCB	2023826-2022-02444	2022-02-09 05:00:00	Injury	STAAR SURGICAL COMPANY	2022-07-28 04:00:00	QCB	IMPLANTABLE COLLAMER LENS (ICL)	Misfocusing	Blurred Vision	P030016	NA	1	Event Description: THE REPORTER INDICATED THAT A 12.6M VTICMO12.6 IMPLANTABLE COLLAMER LENS OF -9.5/1.0/077 (SPHERE/CYLINDER/AXIS) WAS IMPLANTED INTO THE PATIENT'S RIGHT EYE (OD) ON (B)(6) 2022. ON (B)(6) 2022 THE LENS WAS EXCHANGED FOR A DIFFERENT CYLINDER AND AXIS LENS DUE TO REFRACTIVE SURPRISE. THE EXCHANGE RESOLVED THE PROBLEM. CAUSE OF EVENT WAS REPORTED AS UNKNOWN. Manufacturer Narrative: …	Lens Exchange	Resolved
https://www.accessdata.fda.gov/scripts/cdrh/cfdocs/cfMAUDE/Detail.CFM?MDRFOI__ID=15153360&pc=QCB	2023826-2022-02581	2022-06-13 04:00:00	Injury	STAAR SURGICAL COMPANY	2022-08-02 04:00:00	QCB	IMPLANTABLE COLLAMER LENS (ICL)	Misfocusing	Blurred Vision	P030016	NA	1	Event Description: THE REPORTER INDICATED THAT A 12.1MM VTICM5_12.1 IMPLANTABLE COLLAMER LENS OF -11.50/2.0/101 (SPHERE/CYLINDER/AXIS) WAS IMPLANTED INTO THE PATIENT'S RIGHT EYE (OD) ON (B)(6) 2022. ON (B)(6) 2022 THE LENS WAS EXCHANGED FOR A DIFFERENT POWER LENS OF LONGER LENGTH DUE TO REFRACTIVE SURPRISE. THE EXCHANGE RESOLVED THE PROBLEM. CAUSE IS REPORTED AS UNKNOWN. Manufacturer Narrative: H…	Lens Exchange	Resolved
https://www.accessdata.fda.gov/scripts/cdrh/cfdocs/cfMAUDE/Detail.CFM?MDRFOI__ID=15180105&pc=QCB	2023826-2022-02630	2021-02-28 05:00:00	Injury	STAAR SURGICAL COMPANY	2022-08-05 04:00:00	QCB	IMPLANTABLE COLLAMER LENS (ICL)	Misfocusing; Off-Label Use	Blurred Vision	P030016	NA	1	Event Description: THE REPORTER INDICATED THAT THE SURGEON IMPLANTED A 12.1MM VTICMO 12.1 IMPLANTABLE COLLAMER LENS OF -10.50/2.5/98 (SPHERE/CYLINDER/AXIS) INTO THE PATIENTS LEFT EYE (OS) ON (B)(6) 2021. ON (B)(6) 2022 THE LENS WAS REMOVED AND ON THE SAME DAY A DIFFERENT SURGERY A REPLACEMENT LENS OF THE SAME MODEL; SIZE LENS BUT DIFFERENT POWER LENS WAS IMPLANTED DUE TO REFRACTIVE SURPRISE. THE …	Lens Exchange	Resolved
https://www.accessdata.fda.gov/scripts/cdrh/cfdocs/cfMAUDE/Detail.CFM?MDRFOI__ID=15180107&pc=QCB	2023826-2022-02629	2021-02-28 05:00:00	Injury	STAAR SURGICAL COMPANY	2022-08-05 04:00:00	QCB	IMPLANTABLE COLLAMER LENS (ICL)	Misfocusing; Off-Label Use	Blurred Vision	P030016	NA	1	Event Description: THE REPORTER INDICATED THAT THE SURGEON IMPLANTED A 12.1MM VTICMO 12.1 IMPLANTABLE COLLAMER LENS OF -11.0/1.5/88 (SPHERE/CYLINDER/AXIS) INTO THE PATIENTS RIGHT EYE (OD) ON (B)(6)2021. ON (B)(6) 2022 THE LENS WAS REMOVED AND ON THE SAME DAY A DIFFERENT SURGERY A REPLACEMENT LENS OF THE SAME MODEL; SIZE LENS BUT DIFFERENT POWER LENS WAS IMPLANTED DUE TO REFRACTIVE SURPRISE. THE R…	Lens Exchange	Resolved
https://www.accessdata.fda.gov/scripts/cdrh/cfdocs/cfMAUDE/Detail.CFM?MDRFOI__ID=15204034&pc=QCB	2023826-2022-02701	2022-07-08 04:00:00	Injury	STAAR SURGICAL COMPANY	2022-08-10 04:00:00	QCB	IMPLANTABLE COLLAMER LENS (ICL)	Device Dislodged or Dislocated	Blurred Vision	P030016	NA	1	Event Description: THE REPORTER INDICATED THAT A 12.6MM, VTICM5_12.6, -9.00/4.00/086 (SPHERE/CYLINDER/AXIS) IMPLANTABLE COLLAMER LENS WAS IMPLANTED INTO THE PATIENTS RIGHT EYE (OD) ON (B)(6) 2022. LENS ROTATION NOT ASSOCIATED TO A LOW VAULT AND UNDESIRABLE REFRACTIVE OUTCOME WAS REPORTER, LENS REMAINS IMPLANTED. CAUSE OF EVENT WAS REPORTED AS UNKNOWN. IF ADDITIONAL INFORMATION IS RECEIVED A SUPPL…	Lens Repositioning	Resolved
https://www.accessdata.fda.gov/scripts/cdrh/cfdocs/cfMAUDE/Detail.CFM?MDRFOI__ID=15204622&pc=QCB	2023826-2022-02627	2022-05-06 04:00:00	Injury	STAAR SURGICAL COMPANY	2022-08-10 04:00:00	QCB	IMPLANTABLE COLLAMER LENS (ICL)	Misfocusing	Blurred Vision	P030016	NA	1	Event Description: THE REPORTER INDICATED THAT THE SURGEON IMPLANTED A 13.7MM VTICM5_13.7; -8.00/2.50/081 (SPHERE/CYLINDER/AXIS) IMPLANTABLE COLLAMER LENS INTO THE PATIENT'S LEFT EYE (OS) ON (B)(6) 2022; AS A REPLACEMENT LENS TO A PREVIOUS LOW VAULT WITH ROTATION ISSUE. THE PATIENT NOW HAS REFRACTIVE SURPRISE; AND REFRACTIVE CHANGE OVER TIME. THE LENS REMAINS IMPLANTED. THE CAUSE OF THE EVENT WAS…	Lens Extraction	Unknown
https://www.accessdata.fda.gov/scripts/cdrh/cfdocs/cfMAUDE/Detail.CFM?MDRFOI__ID=15217420&pc=QCB	2023826-2022-02695	2022-07-12 04:00:00	Injury	STAAR SURGICAL COMPANY	2022-08-12 04:00:00	QCB	IMPLANTABLE COLLAMER LENS (ICL)	Misfocusing	Blurred Vision	P030016	NA	1	Event Description: THE REPORTER INDICATED THAT A 12.6MM VTICM5_12.6 IMPLANTABLE COLLAMER LENS OF -11.5/+2.0/134 (SPHERE/CYLINDER/AXIS) WAS IMPLANTED INTO THE PATIENT'S LEFT EYE (OS) ON (B)(6) 2022. ON _x000D_ (B)(6) 2022 THE LENS WAS EXCHANGED FOR DIFFERENT POWER LENS DUE TO THE DOCTOR SELECTING THE WRONG LENS POWER. THE EXCHANGE RESOLVED THE PROBLEM. IT WAS REPORTED THAT THE CAUSE OF THE EVENT W…	Lens Exchange	Resolved
https://www.accessdata.fda.gov/scripts/cdrh/cfdocs/cfMAUDE/Detail.CFM?MDRFOI__ID=15227610&pc=QCB	2023826-2022-02783	2022-06-27 04:00:00	Injury	STAAR SURGICAL COMPANY	2022-08-15 04:00:00	QCB	IMPLANTABLE COLLAMER LENS (ICL)	Misfocusing	Blurred Vision	P030016	NA	1	Event Description: THE REPORTER INDICATED THAT THE SURGEON IMPLANTED A 12.6MM VTICM5_12.6; -11.5/3.86 (SPHERE/CYLINDER/AXIS) IMPLANTABLE COLLAMER LENS INTO THE PATIENT'S LEFT EYE (OS) ON_x000D_ (B)(6) 2022. THE PATIENT EXPERIENCED REFRACTIVE SURPRISE. ON (B)(6) 2022 THE LENS WAS EXCHANGED WITH A SAME LENGTH BUT DIFFERENT POWER LENS AND THIS RESOLVED THE PROBLEM. THE CAUSE OF THE EVENT WAS REPORTE…	Lens Exchange	Resolved
https://www.accessdata.fda.gov/scripts/cdrh/cfdocs/cfMAUDE/Detail.CFM?MDRFOI__ID=15276388&pc=QCB	2023826-2022-02826	2021-11-25 05:00:00	Injury	STAAR SURGICAL COMPANY	2022-08-23 04:00:00	QCB	IMPLANTABLE COLLAMER LENS (ICL)	Misfocusing	Blurred Vision	P030016	NA	1	Event Description: THE REPORTER INDICATED THAT A 12.6MM VTICMO12.6 IMPLANTABLE COLLAMER LENS OF -11.5/2.0/93 (SPHERE/CYLINDER/AXIS) WAS IMPLANTED IN THE PATIENT'S RIGHT EYE (OD) ON (B)(6) 2021. ON (B)(6) 2022, THE LENS WAS EXCHANGED FOR A SAME MODEL, SAME SIZE LENS DUE TO REFRACTIVE SURPRISE. THE PROBLEM WAS RESOLVED. CAUSE OF THE EVENT IS UNKNOWN. Manufacturer Narrative: CORRECTED DATA: D4. MODE…	Lens Exchange	Resolved
https://www.accessdata.fda.gov/scripts/cdrh/cfdocs/cfMAUDE/Detail.CFM?MDRFOI__ID=15299051&pc=QCB	2023826-2022-02919	2022-07-08 04:00:00	Injury	STAAR SURGICAL COMPANY	2022-08-25 04:00:00	QCB	IMPLANTABLE COLLAMER LENS (ICL)	Misfocusing; Off-Label Use	Blurred Vision	P030016	NA	1	Event Description: THE REPORTER INDICATED THAT THE SURGEON IMPLANTED A 12.1MM VTICMO12.1; -7.5/1.5/168 (SPHERE/CYLINDER/AXIS) IMPLANTABLE COLLAMER LENS INTO THE PATIENT'S LEFT EYE (OS) ON (B)(6) 2022. THE PATIENT EXPERIENCED REFRACTIVE SURPRISE. ON (B)(6) 2022 THE LENS WAS EXCHANGED WITH A SAME LENGTH BUT DIFFERENT POWER LENS AND THIS RESOLVED THE PROBLEM. THE CAUSE OF THE EVENT WAS REPORTED AS U…	Lens Exchange	Resolved
https://www.accessdata.fda.gov/scripts/cdrh/cfdocs/cfMAUDE/Detail.CFM?MDRFOI__ID=15299255&pc=QCB	2023826-2022-02530	2022-05-09 04:00:00	Injury	STAAR SURGICAL COMPANY	2022-08-25 04:00:00	QCB	IMPLANTABLE COLLAMER LENS (ICL)	Inadequacy of Device Shape and/or Size; Device Dislodged or Dislocated	Blurred Vision	P030016	NA	1	Event Description: THE REPORTER INDICATED THAT A 12.6MM VTICM5 12.6 IMPLANTABLE COLLAMER LENS OF -11.0/2.5/071 (SPHERE/CYLINDER/AXIS) WAS IMPLANTED INTO THE PATIENT'S LEFT EYE (OS) ON (B)(6) 2022. ON (B)(6) 2022 THE LENS WAS EXCHANGED FOR A LONGER LENGTH LENS DUE TO LOW VAULT WITH LENS ROTATION AND BLURRED VISION. THE REPLACEMENT LENS RESOLVED THE PROBLEM. CAUSE REPORTED AS UNKNOWN. Manufacturer …	Lens Exchange	Resolved
https://www.accessdata.fda.gov/scripts/cdrh/cfdocs/cfMAUDE/Detail.CFM?MDRFOI__ID=15299617&pc=QCB	2023826-2022-02925	2022-05-16 04:00:00	Injury	STAAR SURGICAL COMPANY	2022-08-26 04:00:00	QCB	IMPLANTABLE COLLAMER LENS (ICL)	Inadequacy of Device Shape and/or Size	Blurred Vision	P030016	NA	1	Event Description: THE REPORTER INDICATED THAT A 13.2MM VTICM013.2 IMPLANTABLE COLLAMER LENS OF -9.50/1.0/161 (SPHERE/CYLINDER/AXIS) WAS IMPLANTED INTO THE PATIENT'S RIGHT EYE (OD) ON (B)(6) 2022. ON (B)(6) 2022 THE LENS WAS EXPLANTED DUE TO EXCESSIVE VAULT . A REPLACEMENT LENS OF SAME LENGTH, DIFFERENT MODEL AND POWER WAS LATER IMPLANTED AND THE PROBLEM RESOLVED. CAUSE WAS REPORTED AS UNKNOWN. T…	Lens Exchange	Resolved
https://www.accessdata.fda.gov/scripts/cdrh/cfdocs/cfMAUDE/Detail.CFM?MDRFOI__ID=15299656&pc=QCB	2023826-2022-02927	2022-06-18 04:00:00	Injury	STAAR SURGICAL COMPANY	2022-08-26 04:00:00	QCB	IMPLANTABLE COLLAMER LENS (ICL)	Off-Label Use; Device Dislodged or Dislocated	Blurred Vision	P030016	NA	1	Event Description: THE REPORTER INDICATED THAT A 12.6MM VTICMO12.6 IMPLANTABLE COLLAMER LENS OF -10.5/2.0/076 (SPHERE/CYLINDER/AXIS) WAS IMPLANTED INTO THE PATIENT'S LEFT EYE (OS) ON (B)(6) 2022. ON (B)(6) 2022 THE LENS WAS EXCHANGED FOR A SAME LENGTH LENS THAT WAS IMPLANTED VERTICALLY AND THE PROBLEM RESOLVED. CAUSE OF EVENT WAS UNKNOWN. Manufacturer Narrative: H3: DEVICE EVALUATION - LENS WAS R…	Lens Exchange	Resolved
https://www.accessdata.fda.gov/scripts/cdrh/cfdocs/cfMAUDE/Detail.CFM?MDRFOI__ID=15325099&pc=QCB	2023826-2022-02977	2022-08-09 04:00:00	Injury	STAAR SURGICAL COMPANY	2022-08-30 04:00:00	QCB	IMPLANTABLE COLLAMER LENS (ICL)	Misfocusing	Blurred Vision	P030016	NA	1	Event Description: THE REPORTER INDICATED THAT THE SURGEON IMPLANTED A 12.6MM VTICMO12.6; -17.0/1.5/065 (SPHERE/CYLINDER/AXIS) IMPLANTABLE COLLAMER LENS INTO THE PATIENT'S LEFT EYE (OS) ON _x000D_ (B)(6) 2022. THE PATIENT EXPERIENCED REFRACTIVE SURPRISE. ON (B)(6) 2022 THE LENS WAS EXCHANGED WITH A SAME LENGTH BUT DIFFERENT POWER LENS AND IMPLANTED VERTICALLY. THIS RESOLVED THE PROBLEM. THE CAUSE…	Lens Exchange	Resolved
https://www.accessdata.fda.gov/scripts/cdrh/cfdocs/cfMAUDE/Detail.CFM?MDRFOI__ID=15325103&pc=QCB	2023826-2022-02976	2022-08-01 04:00:00	Injury	STAAR SURGICAL COMPANY	2022-08-30 04:00:00	QCB	IMPLANTABLE COLLAMER LENS (ICL)	Misfocusing	Blurred Vision	P030016	NA	1	Event Description: THE REPORTER INDICATED THAT THE SURGEON IMPLANTED A 12.6MM VTICMO12.6; -17.0/2.0/091 (SPHERE/CYLINDER/AXIS) IMPLANTABLE COLLAMER LENS INTO THE PATIENT'S RIGHT EYE (OD) ON (B)(6) 2022. THE PATIENT EXPERIENCED REFRACTIVE SURPRISE. ON (B)(6) 2022 THE LENS WAS EXCHANGED WITH A SAME LENGTH BUT DIFFERENT POWER LENS AND THIS RESOLVED THE PROBLEM. THE CAUSE OF THE EVENT WAS REPORTED AS…	Lens Exchange	Resolved
https://www.accessdata.fda.gov/scripts/cdrh/cfdocs/cfMAUDE/Detail.CFM?MDRFOI__ID=15342016&pc=QCB	2023826-2022-02969	NA	Injury	STAAR SURGICAL COMPANY	2022-09-01 04:00:00	QCB	IMPLANTABLE COLLAMER LENS (ICL)	Misfocusing	Blurred Vision	P030016	NA	1	Event Description: THE REPORTER INDICATED THAT A 13.2MM VTICM13.2 IMPLANTABLE COLLAMER LENS OF -10.50/0.5/117 (SPHERE/CYLINDER/AXIS) WAS IMPLANTED IN THE PATIENT'S LEFT EYE (OS) ON (B)(6) 2014. ON (B)(6) 2022, REFRACTIVE CHANGE OVER TIME WITH LOW VAULT WAS RECORDED. A LENS EXHANGE IS PLANNED. LENS REMAINS IMPLANTED. Manufacturer Narrative: B1 - CORRECTED TO PRODUCT PROBLEM (E.G. DEFECTS/MALFUNCTI…	Lens Exchange	Resolved
https://www.accessdata.fda.gov/scripts/cdrh/cfdocs/cfMAUDE/Detail.CFM?MDRFOI__ID=15342195&pc=QCB	2023826-2022-02970	NA	Injury	STAAR SURGICAL COMPANY	2022-09-01 04:00:00	QCB	IMPLANTABLE COLLAMER LENS (ICL)	Misfocusing	Blurred Vision	P030016	NA	1	Event Description: THE REPORTER INDICATED THAT A 13.2MM VTICM13.2 IMPLANTABLE COLLAMER LENS OF -11.5/1.0/82 (SPHERE/CYLINDER/AXIS) WAS IMPLANTED INTO THE PATIENT'S RIGHT EYE (OD) ON (B)(6) 2014. ON (B)(6) 2022, REFRACTIVE CHANGE OVER TIME WITH LOW VAULT WAS RECORDED. A LENS EXHANGE IS PLANNED. LENS REMAINS IMPLANTED. Manufacturer Narrative: WEIGHT, ETHNICITY, RACE: UNK. WORK ORDER SEARCH: NO SIMI…	Lens Exchange	Resolved
https://www.accessdata.fda.gov/scripts/cdrh/cfdocs/cfMAUDE/Detail.CFM?MDRFOI__ID=15385938&pc=QCB	2023826-2022-03048	2022-07-30 04:00:00	Injury	STAAR SURGICAL COMPANY	2022-09-08 04:00:00	QCB	IMPLANTABLE COLLAMER LENS (ICL)	Misfocusing	Blurred Vision	P030016	NA	1	Event Description: THE REPORTER INDICATED THAT THE SURGEON IMPLANTED A 13.2MM VTICM5_13.2; -12.00/5.0/099 (SPHERE/CYLINDER/AXIS) IMPLANTABLE COLLAMER LENS INTO THE PATIENT'S LEFT EYE (OS) ON (B)(6) 2022. THE PATIENT EXPERIENCED REFRACTIVE SURPRISE. LENS REMAINS IMPLANTED. THE CAUSE OF THE EVENT WAS REPORTED AS UNKNOWN. Manufacturer Narrative: EXPIRATION DATE: 02-28-2025. (B)(4). Manufacturer Narr…	Lens Extraction	Unknown
https://www.accessdata.fda.gov/scripts/cdrh/cfdocs/cfMAUDE/Detail.CFM?MDRFOI__ID=15407358&pc=QCB	2023826-2022-03069	2022-08-19 04:00:00	Injury	STAAR SURGICAL COMPANY	2022-09-12 04:00:00	QCB	IMPLANTABLE COLLAMER LENS (ICL)	Misfocusing; Off-Label Use	Blurred Vision	P030016	NA	1	Event Description: THE REPORTER INDICATED THAT THE SURGEON IMPLANTED A 13.2MM VTICMO13.2; -1.5/1.5/086 (SPHERE/CYLINDER/AXIS) IMPLANTABLE COLLAMER LENS INTO THE PATIENT'S LEFT EYE (OS) ON (B)(6) 2022. THE PATIENT EXPERIENCED REFRACTIVE SURPRISE. ON (B)(6) 2022 THE LENS WAS EXPLANTED; ON THIS SAME DATE A REPLACEMENT LENS OF THE SAME LENGTH BUT DIFFERENT POWER WAS IMPLANTED AND THE PROBLEM WAS RESO…	Lens Exchange	Resolved
https://www.accessdata.fda.gov/scripts/cdrh/cfdocs/cfMAUDE/Detail.CFM?MDRFOI__ID=15423219&pc=QCB	2023826-2022-03072	2022-02-15 05:00:00	Injury	STAAR SURGICAL COMPANY	2022-09-14 04:00:00	QCB	IMPLANTABLE COLLAMER LENS (ICL)	Misfocusing; Device Dislodged or Dislocated	Blurred Vision	P030016	NA	1	Event Description: THE REPORTER INDICATED THAT A 12.6MM VTICMO 12.6 IMPLANTABLE COLLAMER LENS OF -11.0/4.0/58 (SPHERE/CYLINDER/AXIS) WAS IMPLANTED INTO THE PATIENTS LEFT EYE (OS) ON (B)(6) 2022. LENS ROTATION WAS OBSERVED AND BLURRED VISION.. THE VAULT WAS GOOD BUT THE LENS ROTATED OFF AXIS AND AFFECTED THE REFRACTION. THE LENS WAS REPOSITIONED AND THIS DID NOT RESOLVE THE PROBLEM. ON (B)(6) 2022…	Lens Exchange	Resolved
https://www.accessdata.fda.gov/scripts/cdrh/cfdocs/cfMAUDE/Detail.CFM?MDRFOI__ID=15423220&pc=QCB	2023826-2022-03071	2022-02-15 05:00:00	Injury	STAAR SURGICAL COMPANY	2022-09-14 04:00:00	QCB	IMPLANTABLE COLLAMER LENS (ICL)	Misfocusing; Device Dislodged or Dislocated	Blurred Vision	P030016	NA	1	Event Description: THE REPORTER INDICATED THAT A 12.6MM VTICMO 12.6 IMPLANTABLE COLLAMER LENS OF -14.5/4.5/102 (SPHERE/CYLINDER/AXIS) WAS IMPLANTED INTO THE PATIENTS RIGHT EYE (OD) ON (B)(6) 2022. LENS ROTATION WAS OBSERVED AND BLURRED VISION. THE VAULT WAS GOOD BUT THE LENS ROTATED OFF AXIS AND AFFECTED THE REFRACTION. THE LENS WAS REPOSITIONED AND THIS DID NOT RESOLVE THE PROBLEM. ON (B)(6) 202…	Lens Exchange	Resolved
https://www.accessdata.fda.gov/scripts/cdrh/cfdocs/cfMAUDE/Detail.CFM?MDRFOI__ID=15423292&pc=QCB	2023826-2022-03053	2022-07-31 04:00:00	Injury	STAAR SURGICAL COMPANY	2022-09-14 04:00:00	QCB	IMPLANTABLE COLLAMER LENS (ICL)	Misfocusing	Blurred Vision	P030016	NA	1	Event Description: THE REPORTER INDICATED THAT A 12.1MM VTICMO12.1 IMPLANTABLE COLLAMER LENS OF -14.0/1.5/92 (SPHERE/CYLINDER/AXIS) WAS IMPLANTED IN THE PATIENT'S RIGHT EYE (OD) ON (B)(6) 2021. ON (B)(6) 2022, THE LENS WAS REMOVED AND IN A SUBSEQUENT SURGERY LATER THAT DAY, A LONGER LENGTH LENS WAS IMPLANTED DUE TO REFRACTIVE SURPRISE AND REFRACTIVE CHANGE OVER TIME. THE PROBLEM WAS RESOLVED. REP…	Lens Exchange	Resolved
https://www.accessdata.fda.gov/scripts/cdrh/cfdocs/cfMAUDE/Detail.CFM?MDRFOI__ID=15423498&pc=QCB	2023826-2022-03054	2022-07-31 04:00:00	Injury	STAAR SURGICAL COMPANY	2022-09-14 04:00:00	QCB	IMPLANTABLE COLLAMER LENS (ICL)	Misfocusing	Blurred Vision	P030016	NA	1	Event Description: THE REPORTER INDICATED THAT A 12.1MM VTICMO12.1 IMPLANTABLE COLLAMER LENS OF -14.0/1.5/86 (SPHERE/CYLINDER/AXIS) WAS IMPLANTED IN THE PATIENT'S LEFT EYE (OS) ON (B)(6) 2021. ON_x000D_ (B)(6) 2022, THE LENS WAS REMOVED AND IN A SUBSEQUENT SURGERY LATER THAT DAY, A LONGER LENGTH LENS WAS IMPLANTED DUE TO REFRACTIVE SURPRISE AND REFRACTIVE CHANGE OVER TIME. THE PROBLEM WAS RESOLVE…	Lens Exchange	Resolved
https://www.accessdata.fda.gov/scripts/cdrh/cfdocs/cfMAUDE/Detail.CFM?MDRFOI__ID=15441785&pc=QCB	2023826-2022-03151	2022-07-30 04:00:00	Injury	STAAR SURGICAL COMPANY	2022-09-16 04:00:00	QCB	IMPLANTABLE COLLAMER LENS (ICL)	Misfocusing; Off-Label Use	Blurred Vision	P030016	NA	1	Event Description: THE REPORTER INDICATED THAT A 12.6MM VTICMO12.6 IMPLANTABLE COLLAMER LENS OF -15.5/2.0/006 (SPHERE/CYLINDER/AXIS) WAS IMPLANTED INTO THE PATIENT'S LEFT EYE (OS) ON (B)(6) 2022. ON (B)(6) 2022 THE LENS WAS EXPLANTED DUE TO REFRACTIVE SURPRISE. A REPLACEMENT LENS OF DIFFERENT POWER WAS LATER IMPLANTED AND THE PROBLEM RESOLVED. CAUSE OF EVENT WAS USER ERROR. Manufacturer Narrative…	Lens Exchange	Resolved
https://www.accessdata.fda.gov/scripts/cdrh/cfdocs/cfMAUDE/Detail.CFM?MDRFOI__ID=15459789&pc=QCB	2023826-2022-03239	2022-04-16 04:00:00	Injury	STAAR SURGICAL COMPANY	2022-09-20 04:00:00	QCB	IMPLANTABLE COLLAMER LENS (ICL)	Misfocusing	Blurred Vision	P030016	NA	1	Event Description: THE REPORTER INDICATED THAT THE SURGEON IMPLANTED A 12.6MM VTICM5_12.6; -13.50/+3.0/114 (SPHERE/CYLINDER/AXIS) IMPLANTABLE COLLAMER LENS INTO THE PATIENT'S RIGHT EYE (OD) ON (B)(6) 2022. THE PATIENT EXPERIENCED REFRACTIVE SURPRISE. LENS REMAINS IMPLANTED. Manufacturer Narrative: TYPE OF INVESTIGATION: 4110 - LENS WORK ORDER SEARCH: NO SIMILAR COMPLAINT TYPE EVENTS REPORTED FOR …	Lens Exchange	Unknown
https://www.accessdata.fda.gov/scripts/cdrh/cfdocs/cfMAUDE/Detail.CFM?MDRFOI__ID=15498967&pc=QCB	2023826-2022-03371	2022-01-26 05:00:00	Injury	STAAR SURGICAL COMPANY	2022-09-28 04:00:00	QCB	IMPLANTABLE COLLAMER LENS (ICL)	Misfocusing; Off-Label Use	Blurred Vision	P030016	NA	1	Event Description: THE REPORTER INDICATED THAT THE SURGEON IMPLANTED A 12.1MM VTICM5_12.1; -13.0/1.5/180 (SPHERE/CYLINDER/AXIS) IMPLANTABLE COLLAMER LENS INTO THE PATIENT'S LEFT EYE (OS) ON (B)(6) 2021. THE PATIENT EXPERIENCED REFRACTIVE SURPRISE. ON (B)(6) 2022 THE LENS WAS EXCHANGED WITH A SAME LENGTH BUT DIFFERENT POWER LENS AND THE PROBLEM WAS RESOLVED. THE CAUSE OF THE EVENT WAS REPORTED AS …	Lens Exchange	Resolved
https://www.accessdata.fda.gov/scripts/cdrh/cfdocs/cfMAUDE/Detail.CFM?MDRFOI__ID=15498988&pc=QCB	2023826-2022-03369	2022-08-09 04:00:00	Malfunction	STAAR SURGICAL COMPANY	2022-09-28 04:00:00	QCB	IMPLANTABLE COLLAMER LENS (ICL)	Misfocusing	Blurred Vision	P030016	NA	1	Event Description: THE REPORTER INDICATED THAT THE SURGEON IMPLANTED A 13.2MM VTICM5_13.2; -2.50/+2.5/179 (SPHERE/CYLINDER/AXIS) IMPLANTABLE COLLAMER LENS INTO THE PATIENT'S RIGHT EYE (OD) ON (B)(6) 2022. THE PATIENT HAS REFRACTIVE SURPRISE. LENS REMAINS IMPLANTED. THE CAUSE OF THE EVENT WAS REPORTED AS UNKNOWN. Manufacturer Narrative: (B)(4). CLAIM# (B)(4).	Lens Retention	Unknown
https://www.accessdata.fda.gov/scripts/cdrh/cfdocs/cfMAUDE/Detail.CFM?MDRFOI__ID=15499015&pc=QCB	2023826-2022-03370	2022-08-09 04:00:00	Malfunction	STAAR SURGICAL COMPANY	2022-09-28 04:00:00	QCB	IMPLANTABLE COLLAMER LENS (ICL)	Misfocusing	Blurred Vision	P030016	NA	1	Event Description: THE REPORTER INDICATED THAT THE SURGEON IMPLANTED A 13.2MM VTICM5_13.2; -4.00/+4.0/174 (SPHERE/CYLINDER/AXIS) IMPLANTABLE COLLAMER LENS INTO THE PATIENT'S LEFT EYE (OS) ON (B)(6)2022. THE PATIENT EXPERIENCED REFRACTIVE SURPRISE. LENS REMAINS IMPLANTED. THE CAUSE OF THE EVENT WAS REPORTED AS UNKNOWN. Manufacturer Narrative: (B)(4).	Lens Retention	Unknown
https://www.accessdata.fda.gov/scripts/cdrh/cfdocs/cfMAUDE/Detail.CFM?MDRFOI__ID=15508658&pc=QCB	2023826-2022-03344	2022-08-02 04:00:00	Injury	STAAR SURGICAL COMPANY	2022-09-29 04:00:00	QCB	IMPLANTABLE COLLAMER LENS (ICL)	Misfocusing; Off-Label Use	Blurred Vision	P030016	NA	1	Event Description: THE REPORTER INDICATED THAT A 13.2MM VTICMO13.2 IMPLANTABLE COLLAMER LENS OF -5.5/3.0/094 (SPHERE/CYLINDER/AXIS) WAS IMPLANTED INTO THE PATIENT'S RIGHT EYE (OD) ON (B)(6) 2022. ON (B)(6) 2022 THE LENS WAS EXCHANGED FOR A DIFFERENT POWER LENS DUE TO REFRACTIVE SURPRISE. THE EXCHANGE RESOLVED THE PROBLEM. CAUSE OF EVENT WAS USER ERROR. Manufacturer Narrative: (B)(4). CLAIM# (B)(4…	Lens Exchange	Resolved
https://www.accessdata.fda.gov/scripts/cdrh/cfdocs/cfMAUDE/Detail.CFM?MDRFOI__ID=15524739&pc=QCB	2023826-2022-03366	2022-09-01 04:00:00	Injury	STAAR SURGICAL COMPANY	2022-10-01 04:00:00	QCB	IMPLANTABLE COLLAMER LENS (ICL)	Misfocusing	Blurred Vision	P030016	NA	1	Event Description: THE REPORTER INDICATED THAT A 13.7MM VTICMO13.7 IMPLANTABLE COLLAMER LENS OF -15.0/5.0/59 (SPHERE/CYLINDER/AXIS) WAS IMPLANTED IN THE PATIENT'S LEFT EYE (OS) ON (B)(6) 2022. REFRACTIVE SURPRISE WAS OBSERVED. REPORTEDLY, "THE DOCTOR PROBABLY DID NOT POSITION LENS CORRECTLY." CAUSE OF THE EVENT WAS USER ERROR. Manufacturer Narrative: CLAIM# (B)(4). Manufacturer Narrative: B5 - LE…	Lens Extraction	Resolved
https://www.accessdata.fda.gov/scripts/cdrh/cfdocs/cfMAUDE/Detail.CFM?MDRFOI__ID=15534242&pc=QCB	2023826-2022-03428	2022-04-23 04:00:00	Injury	STAAR SURGICAL COMPANY	2022-10-03 04:00:00	QCB	IMPLANTABLE COLLAMER LENS (ICL)	Misfocusing	Blurred Vision	P030016	NA	1	Event Description: THE REPORTER INDICATED THAT A 12.6MM VTICMO13.2 IMPLANTABLE COLLAMER LENS OF -12.0/2.0/089 (SPHERE/CYLINDER/AXIS) WAS IMPLANTED IN THE PATIENT'S RIGHT EYE (OD) ON (B)(6) 2022. ON (B)(6) 2022 THE LENS WAS REPOSITIONED, BUT WAS NOT RESOLVED. ON (B)(6) 2022, THE LENS WAS EXCHANGED FOR A LARGER LENGTH LENS DUE TO LENS ROTATION NOT ASSOCIATED TO LOW VAULT. THE PROBLEM WAS RESOLVED. …	Lens Exchange	Resolved
https://www.accessdata.fda.gov/scripts/cdrh/cfdocs/cfMAUDE/Detail.CFM?MDRFOI__ID=15534408&pc=QCB	2023826-2022-03427	2022-05-31 04:00:00	Injury	STAAR SURGICAL COMPANY	2022-10-03 04:00:00	QCB	IMPLANTABLE COLLAMER LENS (ICL)	Misfocusing	Blurred Vision	P030016	NA	1	Event Description: THE REPORTER INDICATED THAT A 13.2MM VTICMO13.2 IMPLANTABLE COLLAMER LENS OF -11.5/2.0/084 (SPHERE/CYLINDER/AXIS) WAS IMPLANTED IN THE PATIENT'S LEFT EYE (OS) ON (B)(6) 2022. ON (B)(6) 2022, THE LENS WAS REPOSITION AND WAS NOT RESOLVED. ON (B)(6) 2022, THE LENS WAS EXCHANGED FOR A SPHERICAL MODEL, SAME SIZE LENS DUE TO LENS ROTATION NOT ASSOCIATED TO LOW VAULT. THE PROBLEM WAS …	Lens Exchange	Resolved
https://www.accessdata.fda.gov/scripts/cdrh/cfdocs/cfMAUDE/Detail.CFM?MDRFOI__ID=15557486&pc=QCB	2023826-2022-03452	2022-05-06 04:00:00	Injury	STAAR SURGICAL COMPANY	2022-10-06 04:00:00	QCB	IMPLANTABLE COLLAMER LENS (ICL)	Misfocusing	Blurred Vision	NA	NA	1	Event Description: THE REPORTER INDICATED THAT THE SURGEON OBSERVED REFRACTIVE CHANGE OVER TIME IN THE PATIENT'S LEFT EYE (OS). Manufacturer Narrative: WEIGHT, ETHNICITY, RACE:UNK CLAIM# (B)(4). Manufacturer Narrative: B1: PRODUCT PROBLEM. B2: ENTRY SHOULD BE LEFT BLANK . CLAIM# (B)(4). Manufacturer Narrative: B5: THE REPORTER INDICATED THAT THE SURGEON IMPLANTED A 12.6MM VTICM512.6 IMPLANTABLE C…	Lens Extraction	Unknown
https://www.accessdata.fda.gov/scripts/cdrh/cfdocs/cfMAUDE/Detail.CFM?MDRFOI__ID=15609430&pc=QCB	2023826-2022-03642	2022-07-01 04:00:00	Injury	STAAR SURGICAL COMPANY	2022-10-14 04:00:00	QCB	IMPLANTABLE COLLAMER LENS (ICL)	Misfocusing	Blurred Vision	P030016	NA	1	Event Description: THE REPORTER INDICATED THAT A 12.6MM VTICMO 12.6 IMPLANTABLE COLLAMER LENS OF -18.0/6.0/80 (SPHERE/CYLINDER/AXIS) WAS IMPLANTED INTO THE PATIENT'S LEFT EYE (OS) ON (B)(6) 2022. ON (B)(6) 2022 THE LENS WAS EXCHANGED FOR A SAME MODEL; SIZE LENS BUT DIFFERENT POWER DUE TO REFRACTIVE SURPRISE. THE REPLACEMENT LENS RESOLVED THE PROBLEM. CAUSE REPORTED AS UNKNOWN. "THE FIRST TIME, AN…	Lens Exchange	Resolved
https://www.accessdata.fda.gov/scripts/cdrh/cfdocs/cfMAUDE/Detail.CFM?MDRFOI__ID=15629399&pc=QCB	2023826-2022-03705	2022-09-21 04:00:00	Malfunction	STAAR SURGICAL COMPANY	2022-10-18 04:00:00	QCB	IMPLANTABLE COLLAMER LENS (ICL)	Misfocusing	Blurred Vision	P030016	NA	1	Event Description: THE REPORTER INDICATED THAT THE SURGEON IMPLANTED A 12.6MM VTICM5_12.6; -11.5/+3.0/83 (SPHERE/CYLINDER/AXIS) IMPLANTABLE COLLAMER LENS INTO THE PATIENT'S LEFT EYE (OS) ON (B)(6) 2022. THE PATIENT EXPERIENCED REFRACTIVE SURPRISE. LENS REMAINS IMPLANTED. Manufacturer Narrative: (B)(4). CLAIM# (B)(4). Manufacturer Narrative: H1: CORRECTED TO - MALFUNCTION IN THE INITIAL MDR. CLAIM…	Lens Retention	Unknown
https://www.accessdata.fda.gov/scripts/cdrh/cfdocs/cfMAUDE/Detail.CFM?MDRFOI__ID=15650328&pc=QCB	2023826-2022-03704	2022-09-08 04:00:00	Malfunction	STAAR SURGICAL COMPANY	2022-10-21 04:00:00	QCB	IMPLANTABLE COLLAMER LENS (ICL)	Misfocusing	Blurred Vision	P030016	NA	1	Event Description: THE REPORTER INDICATED THAT A 13.2MM VTICM5_13.2 IMPLANTABLE COLLAMER LENS OF -12.00/+2.5/85 (SPHERE/CYLINDER/AXIS) WAS IMPLANTED INTO THE PATIENT'S LEFT EYE (OS) ON (B)(6) 2022. THE PATIENT EXPERIENCED REFRACTIVE SURPRISE, LENS REMAINS IMPLANTED. IF ADDITIONAL INFORMATION IS RECEIVED A SUPPLEMENTAL MEDWATCH REPORT WILL BE SUBMITTED. Manufacturer Narrative: D4 - CORRECTED TO : …	Lens Retention	Unknown
https://www.accessdata.fda.gov/scripts/cdrh/cfdocs/cfMAUDE/Detail.CFM?MDRFOI__ID=15651860&pc=QCB	2023826-2022-03636	NA	Injury	STAAR SURGICAL COMPANY	2022-10-21 04:00:00	QCB	IMPLANTABLE COLLAMER LENS (ICL)	Misfocusing	Blurred Vision	NA	NA	1	Event Description: THE REPORTER INDICATED THAT A 13.2MM VTICM513.2 IMPLANTABLE COLLAMER LENS OF -6.50/1.0/103 (SPHERE/CYLINDER/AXIS) WAS IMPLANTED INTO THE PATIENT'S RIGHT EYE (OD) ON (B)(6) 2021. ON (B)(6) 2022, THE LENS WAS REPLACED DUE TO REFRACTIVE SURPRISE. THE PROBLEM WAS NOT RESOLVED. CAUSE IS REPORTED AS UNKNOWN. Manufacturer Narrative: H3: PRODUCT EVALUATION: LENS WAS RETURNED IN LIQUID …	Lens Exchange	Not_Resolved
https://www.accessdata.fda.gov/scripts/cdrh/cfdocs/cfMAUDE/Detail.CFM?MDRFOI__ID=15697248&pc=QCB	2023826-2022-03860	2022-02-08 05:00:00	Malfunction	STAAR SURGICAL COMPANY	2022-10-29 04:00:00	QCB	IMPLANTABLE COLLAMER LENS (ICL)	Misfocusing	Blurred Vision	P030016	NA	1	Event Description: THE REPORTER INDICATED THAT A 12.6MM VTICMO 2.6 IMPLANTABLE COLLAMER LENS OF -12.50/2.5/104 (SPHERE/CYLINDER/AXIS) WAS IMPLANTED INTO THE PATIENTS RIGHT EYE (OD) ON (B)(6) 2022. A MEDICAL CONSULT IS BEING PROVIDED TO GIVE GUIDANCE ON HOW TO CORRECT THE PATIENT'S VISION. NO FURTHER INFORMATION HAS BEEN PROVIDED. ATTEMPTS TO OBTAIN ADDITIONAL INFORMATION HAVE NOT BEEN SUCCESSFUL.…	Unknown	Unknown
https://www.accessdata.fda.gov/scripts/cdrh/cfdocs/cfMAUDE/Detail.CFM?MDRFOI__ID=15727569&pc=QCB	2023826-2022-03976	2022-10-31 04:00:00	Injury	STAAR SURGICAL COMPANY	2022-11-04 04:00:00	QCB	IMPLANTABLE COLLAMER LENS (ICL)	Misfocusing; Off-Label Use; Inadequacy of Device Shape and/or Size	Blurred Vision	P030016	NA	1	Event Description: THE REPORTER INDICATED THAT THE SURGEON IMPLANTED A 13.2MM VTICMO_13.2; -6.50/2.0/085 (SPHERE/CYLINDER/AXIS) IMPLANTABLE COLLAMER LENS INTO THE PATIENT'S LEFT EYE (OS) ON (B)(6)2022. THE PATIENT EXPERIENCED EXCESSIVE VAULTING AND BLURRED VISION. ON (B)(6) 2022 THE LENS WAS EXPLANTED. THE CAUSE OF THE EVENT WAS REPORTED AS UNKNOWN. . Manufacturer Narrative: B5 - THE LENS WAS REP…	Lens Exchange	Resolved
https://www.accessdata.fda.gov/scripts/cdrh/cfdocs/cfMAUDE/Detail.CFM?MDRFOI__ID=15728310&pc=QCB	2023826-2022-03975	2022-10-31 04:00:00	Injury	STAAR SURGICAL COMPANY	2022-11-04 04:00:00	QCB	IMPLANTABLE COLLAMER LENS (ICL)	Misfocusing; Off-Label Use; Inadequacy of Device Shape and/or Size	Blurred Vision	P030016	NA	1	Event Description: THE REPORTER INDICATED THAT THE SURGEON IMPLANTED A 13.2MM VTICM5_13.2; -7.50/2.0/103 (SPHERE/CYLINDER/AXIS) IMPLANTABLE COLLAMER LENS INTO THE PATIENT'S RIGHT EYE (OD) ON (B)(6) 2022. THE PATIENT EXPERIENCED EXCESSIVE VAULTING AND BLURRED VISION. ON (B)(6) 2022 THE LENS WAS EXPLANTED. THE CAUSE OF THE EVENT WAS REPORTED AS UNKNOWN. Manufacturer Narrative: B5 - THE LENS WAS REP…	Lens Exchange	Resolved
https://www.accessdata.fda.gov/scripts/cdrh/cfdocs/cfMAUDE/Detail.CFM?MDRFOI__ID=15782580&pc=QCB	2023826-2022-03959	2022-07-21 04:00:00	Malfunction	STAAR SURGICAL COMPANY	2022-11-11 05:00:00	QCB	IMPLANTABLE COLLAMER LENS (ICL)	Misfocusing; Patient-Device Incompatibility	Blurred Vision	P030016	NA	1	Event Description: THE REPORTER INDICATED THAT A 12.6MM VTICM512.6 IMPLANTABLE COLLAMER LENS OF -1.00/4.0/179 (SPHERE/CYLINDER/AXIS) WAS IMPLANTED IN THE PATIENT'S LEFT EYE (OS) ON (B)(6) 2022. REFRACTIVE SURPRISE WAS OBSERVED. CAUSE IS REPORTED AS "USER ERROR." REPORTEDLY, "AWAITING ADVICE FROM MEDICAL AFFERS". Manufacturer Narrative: PATIENT WEIGHT, ETHNICITY, AND RACE: UNK. PATIENT RELATED FAC…	Lens Retention	Not_Resolved
https://www.accessdata.fda.gov/scripts/cdrh/cfdocs/cfMAUDE/Detail.CFM?MDRFOI__ID=15842667&pc=QCB	2023826-2022-04287	2022-08-27 04:00:00	Injury	STAAR SURGICAL COMPANY	2022-11-22 05:00:00	QCB	IMPLANTABLE COLLAMER LENS (ICL)	Misfocusing	Blurred Vision	P030016	NA	1	Event Description: THE REPORTER INDICATED THAT A 12.6MM VTICM5_12.6 IMPLANTABLE COLLAMER LENS OF -7.00/1.50/85 (SPHERE/CYLINDER/AXIS) WAS IMPLANTED INTO THE PATIENT'S RIGHT EYE (OD) ON (B)(6) 2022. ON _x000D_ (B)(6) 2022 THE LENS WAS EXCHANGED FOR A DIFFERENT POWER LENS DUE TO REFRACTIVE SURPRISE. THE EXCHANGE RESOLVED THE PROBLEM. CAUSE IS REPORTED AS UNKNOWN. Manufacturer Narrative: ADDITIONAL …	Lens Exchange	Resolved
https://www.accessdata.fda.gov/scripts/cdrh/cfdocs/cfMAUDE/Detail.CFM?MDRFOI__ID=15843892&pc=QCB	2023826-2022-04289	2022-09-13 04:00:00	Injury	STAAR SURGICAL COMPANY	2022-11-22 05:00:00	QCB	IMPLANTABLE COLLAMER LENS (ICL)	Misfocusing; Inadequacy of Device Shape and/or Size	Blurred Vision	P030016	NA	1	Event Description: THE REPORTER INDICATED THAT A 13.2MM VTICMO13.2 IMPLANTABLE COLLAMER LENS OF -6.5/1.0/113 (SPHERE/CYLINDER/AXIS) WAS IMPLANTED INTO THE PATIENT'S RIGHT EYE (OD) ON (B)(6) 2022. THE PATIENT EXPERIENCED EXCESSIVE VAULT AND REFRACTIVE SURPRISE, LENS REMAINS IMPLANTED. ADDITIONAL INFORMATION HAS BEEN REQUESTED BUT NONE HAS BEEN FORTHCOMING. IF ADDITIONAL INFORMATION IS RECEIVED A S…	Lens Exchange	Resolved
https://www.accessdata.fda.gov/scripts/cdrh/cfdocs/cfMAUDE/Detail.CFM?MDRFOI__ID=15850084&pc=QCB	2023826-2022-04265	2022-01-12 05:00:00	Injury	STAAR SURGICAL COMPANY	2022-11-23 05:00:00	QCB	IMPLANTABLE COLLAMER LENS (ICL)	Misfocusing; Inadequacy of Device Shape and/or Size; Device Dislodged or Dislocated; Adverse Event Without Identified Device or Use Problem	Blurred Vision	P030016	NA	1	Event Description: THE REPORTER INDICATED THAT A 13.2MM VTICM5 13.2 IMPLANTABLE COLLAMER LENS OF -12.0/3.5/093 (SPHERE/CYLINDER/AXIS) WAS IMPLANTED INTO THE PATIENT'S RIGHT EYE (OD) ON (B)(6) 2022. LOW VAULT WITH ROTATION AND REFRACTIVE SURPRISE WAS OBSERVED. ON (B)(6) 2022 THE LENS WAS REPOSITIONED BUT THIS DID NOT RESOLVE THE PROBLEM. THE LENS REMAINS IMPLANTED. IF ADDITIONAL INFORMATION IS REC…	Lens Exchange	Resolved
https://www.accessdata.fda.gov/scripts/cdrh/cfdocs/cfMAUDE/Detail.CFM?MDRFOI__ID=15850228&pc=QCB	2023826-2022-04267	2022-10-21 04:00:00	Malfunction	STAAR SURGICAL COMPANY	2022-11-23 05:00:00	QCB	IMPLANTABLE COLLAMER LENS (ICL)	Misfocusing	Blurred Vision	P030016	NA	1	Event Description: THE REPORTER INDICATED THAT A 13.2MM VTICM5 13.2 IMPLANTABLE COLLAMER LENS OF -7.50/0.50/80 (SPHERE/CYLINDER/AXIS) WAS IMPLANTED INTO THE PATIENTS LEFT EYE (OS) ON (B)(6) 2022. REFRACTIVE SURPRISE WAS OBSERVED. THE LENS REMAINS IMPLANTED. NO FURTHER INFORMATION HAS BEEN PROVIDED. ATTEMPTS TO OBTAIN ADDITIONAL INFORMATION HAVE NOT BEEN SUCCESSFUL. IF ADDITIONAL INFORMATION IS RE…	Lens Retention	Resolved
https://www.accessdata.fda.gov/scripts/cdrh/cfdocs/cfMAUDE/Detail.CFM?MDRFOI__ID=15854790&pc=QCB	2023826-2022-04293	NA	Injury	STAAR SURGICAL COMPANY	2022-11-23 05:00:00	QCB	IMPLANTABLE COLLAMER LENS (ICL)	Misfocusing; Adverse Event Without Identified Device or Use Problem	Blurred Vision	P030016	NA	1	Event Description: THE REPORTER INDICATED THAT A 12.6MM VTICM5_12.6 IMPLANTABLE COLLAMER LENS OF -12.00/+3.00/003 (SPHERE/CYLINDER/AXIS) WAS IMPLANTED INTO THE PATIENT'S LEFT EYE (OS) ON (B)(6) 2022. THE PATIENT EXPERIENCED REFRACTIVE SURPRISE, LENS REMAINS IMPLANTED. IF ADDITIONAL INFORMATION IS RECEIVED A SUPPLEMENTAL MEDWATCH REPORT WILL BE SUBMITTED. Manufacturer Narrative: ADDITIONAL DATA: B…	Lens Extraction	Unknown
https://www.accessdata.fda.gov/scripts/cdrh/cfdocs/cfMAUDE/Detail.CFM?MDRFOI__ID=15874950&pc=QCB	2023826-2022-04304	2021-01-26 05:00:00	Injury	STAAR SURGICAL COMPANY	2022-11-28 05:00:00	QCB	IMPLANTABLE COLLAMER LENS (ICL)	Misfocusing; Device Dislodged or Dislocated	Blurred Vision	P030016	NA	1	Event Description: THE REPORTER INDICATED THAT THE SURGEON IMPLANTED A 13.2MM VTICM5_13.2; -8.5/1.5/95 (SPHERE/CYLINDER/AXIS) IMPLANTABLE COLLAMER LENS INTO THE PATIENT'S RIGHT EYE (OD) ON (B)(6) 2021. THE PATIENT EXPERIENCED REFRACTIVE CHANGE OVER TIME. LENS REMAINS IMPLANTED. THE CAUSE OF THE EVENT WAS REPORTED AS UNKNOWN. IF ADDITIONAL INFORMATION IS RECEIVED A SUPPLEMENTAL MEDWATCH REPORT WIL…	Lens Exchange	Resolved
https://www.accessdata.fda.gov/scripts/cdrh/cfdocs/cfMAUDE/Detail.CFM?MDRFOI__ID=15875543&pc=QCB	2023826-2022-04305	2021-01-26 05:00:00	Malfunction	STAAR SURGICAL COMPANY	2022-11-29 05:00:00	QCB	IMPLANTABLE COLLAMER LENS (ICL)	Misfocusing	Blurred Vision	P030016	NA	1	Event Description: THE REPORTER INDICATED THAT THE SURGEON IMPLANTED A 13.2MM VTICM5_13.2; -7.5/1.5/93 (SPHERE/CYLINDER/AXIS) IMPLANTABLE COLLAMER LENS INTO THE PATIENT'S LEFT EYE (OS) ON (B)(6)2021 . THE PATIENT EXPERIENCED REFRACTIVE CHANGE OVER TIME. LENS REMAINS IMPLANTED. THE CAUSE OF THE EVENT WAS REPORTED AS UNKNOWN. IF ADDITIONAL INFORMATION IS RECEIVED A SUPPLEMENTAL MEDWATCH REPORT WILL…	Lens Retention	Unknown
https://www.accessdata.fda.gov/scripts/cdrh/cfdocs/cfMAUDE/Detail.CFM?MDRFOI__ID=15891930&pc=QCB	2023826-2022-04367	2022-04-12 04:00:00	Injury	STAAR SURGICAL COMPANY	2022-12-01 05:00:00	QCB	IMPLANTABLE COLLAMER LENS (ICL)	Misfocusing	Blurred Vision	P030016	NA	1	Event Description: THE REPORTER INDICATED THAT A 13.2MM VTICMO13.2 IMPLANTABLE COLLAMER LENS OF -4.50/0.5/111 (SPHERE/CYLINDER/AXIS) WAS IMPLANTED INTO THE PATIENT'S RIGHT EYE (OD) ON (B)(6) 2022. THE PATIENT EXPERIENCED REFRACTIVE CHANGE OVERTIME, LENS REMAINS IMPLANTED. IN THE REPORTERS OPINION THE CAUSE OF THIS EVENT IS UNKNOWN. IF ADDITIONAL INFORMATION IS RECEIVED A SUPPLEMENTAL MEDWATCH REP…	Lens Exchange	Resolved
https://www.accessdata.fda.gov/scripts/cdrh/cfdocs/cfMAUDE/Detail.CFM?MDRFOI__ID=15912687&pc=QCB	2023826-2022-04282	2022-11-02 04:00:00	Malfunction	STAAR SURGICAL COMPANY	2022-12-04 05:00:00	QCB	IMPLANTABLE COLLAMER LENS (ICL)	Misfocusing	Blurred Vision	P030016	NA	1	Event Description: THE REPORTER INDICATED THAT A 12.1MM VTICM5 12.1 IMPLANTABLE COLLAMER LENS OF -9.00/1.0/069 (SPHERE/CYLINDER/AXIS) WAS IMPLANTED INTO THE PATIENTS LEFT EYE (OS) ON (B)(6) 2022. REFRACTIVE SURPRISE WAS OBSERVED. THE LENS REMAINS IMPLANTED. NO FURTHER INFORMATION HAS BEEN PROVIDED. ATTEMPTS TO OBTAIN ADDITIONAL INFORMATION HAVE NOT BEEN SUCCESSFUL. IF ADDITIONAL INFORMATION IS RE…	Lens Retention	Unknown
https://www.accessdata.fda.gov/scripts/cdrh/cfdocs/cfMAUDE/Detail.CFM?MDRFOI__ID=15975198&pc=QCB	2023826-2022-04416	NA	Malfunction	STAAR SURGICAL COMPANY	2022-12-14 05:00:00	QCB	IMPLANTABLE COLLAMER LENS (ICL)	Misfocusing	Blurred Vision	P030016	NA	1	Event Description: THE REPORTER INDICATED THAT A 12.6MM VTICM5 12.6 IMPLANTABLE COLLAMER LENS OF -11.0/5.0/091 (SPHERE/CYLINDER/AXIS) WAS IMPLANTED INTO THE PATIENTS RIGHT EYE (OD) ON (B)(6) 2022. REFRACTIVE SURPRISE AND BLURRED VISION WAS OBSERVED. THE LENS REMAINS IMPLANTED. NO FURTHER INFORMATION HAS BEEN PROVIDED. ATTEMPTS TO OBTAIN ADDITIONAL INFORMATION HAVE NOT BEEN SUCCESSFUL. IF ADDITION…	Lens Retention	Unknown
https://www.accessdata.fda.gov/scripts/cdrh/cfdocs/cfMAUDE/Detail.CFM?MDRFOI__ID=15975200&pc=QCB	2023826-2022-04414	2022-11-14 05:00:00	Injury	STAAR SURGICAL COMPANY	2022-12-14 05:00:00	QCB	IMPLANTABLE COLLAMER LENS (ICL)	Misfocusing	Blurred Vision	P030016	NA	1	Event Description: THE REPORTER INDICATED THAT A 12.6MM VTICM5 12.6 IMPLANTABLE COLLAMER LENS OF -14.00/4.5/84 (SPHERE/CYLINDER/AXIS) WAS IMPLANTED INTO THE PATIENTS LEFT EYE (OS) ON (B)(6) 2022. REFRACTIVE SURPRISE WAS OBSERVED. THE LENS REMAINS IMPLANTED. NO FURTHER INFORMATION HAS BEEN PROVIDED. ATTEMPTS TO OBTAIN ADDITIONAL INFORMATION HAVE NOT BEEN SUCCESSFUL. IF ADDITIONAL INFORMATION IS RE…	Lens Retention	Unknown
https://www.accessdata.fda.gov/scripts/cdrh/cfdocs/cfMAUDE/Detail.CFM?MDRFOI__ID=15990827&pc=QCB	2023826-2022-04591	2022-07-06 04:00:00	Injury	STAAR SURGICAL COMPANY	2022-12-15 05:00:00	QCB	IMPLANTABLE COLLAMER LENS (ICL)	Device Dislodged or Dislocated	Blurred Vision	P030016	NA	1	Event Description: THE REPORTER INDICATED THAT A 12.6MM VTICMO12.6 IMPLANTABLE COLLAMER LENS OF -18.00/2.5/093 (SPHERE/CYLINDER/AXIS) WAS IMPLANTED INTO THE PATIENT'S LEFT EYE (OS) ON (B)(6) 2022. ON (B)(6)2022 LENS REPOSITIONING WAS PERFORMED DUE TO LENS ROTATION NOT ASSOCIATED TO A LOW VAULT BUT IT DID NOT RESOLVE THE PROBLEM SO THE LENS WAS EXPLANTED. A SPHERICAL LENS OF LONGER LENGTH WAS LATE…	Lens Exchange	Resolved
https://www.accessdata.fda.gov/scripts/cdrh/cfdocs/cfMAUDE/Detail.CFM?MDRFOI__ID=15991920&pc=QCB	2023826-2022-04417	NA	Malfunction	STAAR SURGICAL COMPANY	2022-12-15 05:00:00	QCB	IMPLANTABLE COLLAMER LENS (ICL)	Misfocusing	Blurred Vision	P030016	NA	1	Event Description: THE REPORTER INDICATED THAT A 12.6MM VTICM5 12.6 IMPLANTABLE COLLAMER LENS OF -8.0/4.5/082 (SPHERE/CYLINDER/AXIS) WAS IMPLANTED INTO THE PATIENTS LEFT EYE (OS) ON (B)(6) 2022. REFRACTIVE SURPRISE AND BLURRED VISION WAS OBSERVED. THE LENS REMAINS IMPLANTED. NO FURTHER INFORMATION HAS BEEN PROVIDED. ATTEMPTS TO OBTAIN ADDITIONAL INFORMATION HAVE NOT BEEN SUCCESSFUL. IF ADDITIONAL…	Lens Retention	Unknown
https://www.accessdata.fda.gov/scripts/cdrh/cfdocs/cfMAUDE/Detail.CFM?MDRFOI__ID=16000596&pc=QCB	2023826-2022-04599	2022-11-17 05:00:00	Injury	STAAR SURGICAL COMPANY	2022-12-16 05:00:00	QCB	IMPLANTABLE COLLAMER LENS (ICL)	Misfocusing	Blurred Vision	P030016	NA	1	Event Description: THE REPORTER INDICATED THAT A 13.7MM VTICM5_13.7 -10.5/3.0/038 IMPLANTABLE COLLAMER LENS WAS IMPLANTED INTO THE PATIENT'S LEFT EYE (OS) ON (B)(6) 2022. ON (B)(6) 2022 THE LENS WAS EXPLANTED DUE TO REFRACTIVE SURPRISE. CAUSE OF EVENT WAS UNKNOWN. SEE MFR # 2023826-2022-02093 FOR CLAIM AGAINST THE INITIAL LENS. Manufacturer Narrative: H3: DEVICE EVALUATION - LENS WAS RETURNED IN …	Lens Extraction	Unknown
https://www.accessdata.fda.gov/scripts/cdrh/cfdocs/cfMAUDE/Detail.CFM?MDRFOI__ID=16019046&pc=QCB	2023826-2022-04708	2022-05-17 04:00:00	Injury	STAAR SURGICAL COMPANY	2022-12-20 05:00:00	QCB	IMPLANTABLE COLLAMER LENS (ICL)	Misfocusing	Blurred Vision	P030016	NA	1	Event Description: THE REPORTER INDICATED THAT THE SURGEON IMPLANTED A 13.2MM VTICM5_13.2; -11.5/+1.0/94 (SPHERE/CYLINDER/AXIS) IMPLANTABLE COLLAMER LENS INTO THE PATIENT'S RIGHT EYE (OD) ON(B)(6)2022. THE PATIENT EXPERIENCED REFRACTIVE SURPRISE. LENS REMAINS IMPLANTED. THE CAUSE OF THE EVENT WAS REPORTED AS "USER ERROR" AND NOTED "THERE IS A SUBJECTIVE OVERCORRECTION IN LENS POWER". Manufacturer…	Lens Exchange	Resolved
https://www.accessdata.fda.gov/scripts/cdrh/cfdocs/cfMAUDE/Detail.CFM?MDRFOI__ID=16024296&pc=QCB	2023826-2022-04693	2020-11-26 05:00:00	Malfunction	STAAR SURGICAL COMPANY	2022-12-21 05:00:00	QCB	IMPLANTABLE COLLAMER LENS (ICL)	Misfocusing; Adverse Event Without Identified Device or Use Problem	Blurred Vision	P030016	NA	1	Event Description: THE REPORTER INDICATED THAT A 13.2MM VTICMO13.2 IMPLANTABLE COLLAMER LENS OF -6.0/1.5/083 (SPHERE/CYLINDER/AXIS) WAS IMPLANTED INTO THE PATIENT'S RIGHT EYE (OD) ON (B)(6)2022. THE LENS WAS INTRAOPERATIVELY IMPLANTED, REMOVED, AND REPLACED WITH THE REPLACEMENT LENS DUE TO A LENS TEAR/BREAK DURING INJECTION DELIVERY INTO THE EYE AND REFRACTIVE SURPRISE. THE PROBLEM WAS RESOLVED. …	Lens Exchange	Resolved
https://www.accessdata.fda.gov/scripts/cdrh/cfdocs/cfMAUDE/Detail.CFM?MDRFOI__ID=16030437&pc=QCB	2023826-2022-04435	2020-10-06 04:00:00	Injury	STAAR SURGICAL COMPANY	2022-12-21 05:00:00	QCB	IMPLANTABLE COLLAMER LENS (ICL)	Misfocusing; Off-Label Use; Inadequacy of Device Shape and/or Size	Blurred Vision	P030016	NA	1	Event Description: THE REPORTER INDICATED THAT A 12.6MM VTICMO12.6 IMPLANTABLE COLLAMER LENS -7.5/1.5/173 (SPHERE/CYLINDER/AXIS) WAS IMPLANTED INTO THE PATIENT'S LEFT EYE (OS) ON (B)(6) 2020. ON (B)(6)2020 THE LENS WAS EXCHANGED FOR A SPHERICAL LENS OF SHORTER LENGTH AND DIFFERENT POWER DUE TO EXCESSIVE VAULT AND REFRACTIVE SURPRISE. THIS EXCHANGE RESOLVED THE PROBLEM. CAUSE OF EVENT WAS UNKNOWN.…	Lens Exchange	Resolved
https://www.accessdata.fda.gov/scripts/cdrh/cfdocs/cfMAUDE/Detail.CFM?MDRFOI__ID=16030860&pc=QCB	2023826-2022-04694	2021-07-07 04:00:00	Injury	STAAR SURGICAL COMPANY	2022-12-21 05:00:00	QCB	IMPLANTABLE COLLAMER LENS (ICL)	Misfocusing	Blurred Vision	P030016	NA	1	Event Description: THE REPORTER INDICATED THAT A 12.6MM VTICMO12.6 IMPLANTABLE COLLAMER LENS OF -6.0/3.5/095 (SPHERE/CYLINDER/AXIS) WAS IMPLANTED IN THE PATIENT'S RIGHT EYE (OD) ON (B)(6) 2020. ON (B)(6) 2021, THE LENS WAS EXCHANGED FOR A SAME MODEL, SAME SIZE LENS DUE TO REFRACTIVE SURPRISE. THE PROBLEM WAS RESOLVED. CAUSE IS REPORTER AS, OTHER. Manufacturer Narrative: B5: THE CAUSE OF THE EVENT…	Lens Exchange	Resolved
https://www.accessdata.fda.gov/scripts/cdrh/cfdocs/cfMAUDE/Detail.CFM?MDRFOI__ID=16030861&pc=QCB	2023826-2022-04695	2021-02-16 05:00:00	Injury	STAAR SURGICAL COMPANY	2022-12-21 05:00:00	QCB	IMPLANTABLE COLLAMER LENS (ICL)	Misfocusing	Blurred Vision	P030016	NA	1	Event Description: THE REPORTER INDICATED THAT A 12.6MM VTICMO12.6 IMPLANTABLE COLLAMER LENS OF -15.0/2.5/081 (SPHERE/CYLINDER/AXIS) WAS IMPLANTED IN THE PATIENT'S LEFT EYE (OS) ON (B)(6) 2020. ON (B)(6) 2021, THE LENS WAS EXCHANGED FOR A SAME MODEL, SAME SIZE LENS DUE TO REFRACTIVE SURPRISE. THE PROBLEM WAS RESOLVED. CAUSE OF THE EVENT WAS REPORTED AS OTHER. Manufacturer Narrative: B5: THE CAUSE…	Lens Exchange	Resolved
https://www.accessdata.fda.gov/scripts/cdrh/cfdocs/cfMAUDE/Detail.CFM?MDRFOI__ID=16034661&pc=QCB	2023826-2022-04644	2021-12-04 05:00:00	Injury	STAAR SURGICAL COMPANY	2022-12-22 05:00:00	QCB	IMPLANTABLE COLLAMER LENS (ICL)	Misfocusing	Blurred Vision	P030016	NA	1	Event Description: THE REPORTER INDICATED THAT A 12.6MM VTICMO12.6 IMPLANTABLE COLLAMER LENS OF -10.5/1.5/72 (SPHERE/CYLINDER/AXIS) WAS IMPLANTED INTO THE PATIENT'S LEFT EYE (OS) ON (B)(6) 2021. ON (B)(6) 2022 THE LENS WAS EXCHANGED FOR A DIFFERENT POWER LENS DUE TO REFRACTIVE SURPRISE. THE EXCHANGE RESOLVED THE PROBLEM. CAUSE OF EVENT WAS UNKNOWN. Manufacturer Narrative: ADDITIONAL INFORMATION: …	Lens Exchange	Resolved
https://www.accessdata.fda.gov/scripts/cdrh/cfdocs/cfMAUDE/Detail.CFM?MDRFOI__ID=16057495&pc=QCB	2023826-2022-04733	2022-01-11 05:00:00	Injury	STAAR SURGICAL COMPANY	2022-12-27 05:00:00	QCB	IMPLANTABLE COLLAMER LENS (ICL)	Misfocusing	Blurred Vision	P030016	NA	1	Event Description: THE REPORTER INDICATED THAT A 12.6MM VTICMO12.6 IMPLANTABLE COLLAMER LENS OF -15.0/1.0/70 (SPHERE/CYLINDER/AXIS) WAS IMPLANTED IN THE PATIENT'S LEFT EYE (OS) ON (B)(6) 2021. ON (B)(6) 2022, THE LENS WAS EXCHANGED FOR A SAME MODEL, SAME SIZE LENS DUE TO REFRACTIVE SURPRISE. THE PROBLEM WAS RESOLVED. CAUSE OF THE EVENT IS UNKNOWN. Manufacturer Narrative: H3: DEVICE EVALUATION - L…	Lens Exchange	Resolved
https://www.accessdata.fda.gov/scripts/cdrh/cfdocs/cfMAUDE/Detail.CFM?MDRFOI__ID=16064724&pc=QCB	2023826-2022-04691	2021-02-04 05:00:00	Injury	STAAR SURGICAL COMPANY	2022-12-28 05:00:00	QCB	IMPLANTABLE COLLAMER LENS (ICL)	Misfocusing	Blurred Vision	P030016	NA	1	Event Description: THE REPORTER INDICATED THE SURGEON IMPLANTED A 12.6MM VTICMO12.6 IMPLANTABLE COLLAMER LENS, -04.00/+1.0/092 (SPHERE/CYLINDER/AXIS), IN THE PATIENTS RIGHT EYE (OD), ON (B)(6) 2020. THE LENS WAS EXPLANTED ON (B)(6) 2021 DUE TO PATIENT EXPERIENCED BLURRED VISION. THE LENS WAS REPLACED WITH ANOTHER SAME MODEL/LENGTH BUT DIFFERENT DIOPTER LENS AND THE PROBLEM WAS RESOLVED. THE CAUSE…	Lens Exchange	Resolved
https://www.accessdata.fda.gov/scripts/cdrh/cfdocs/cfMAUDE/Detail.CFM?MDRFOI__ID=16075117&pc=QCB	2023826-2022-04773	NA	Malfunction	STAAR SURGICAL COMPANY	2022-12-29 05:00:00	QCB	IMPLANTABLE COLLAMER LENS (ICL)	Misfocusing; Device Dislodged or Dislocated	Blurred Vision	P030016	NA	1	Event Description: THE REPORTER INDICATED THAT THE SURGEON IMPLANTED A 12.6MM VTICM5_12.6; -9.00/1.0/099 (SPHERE/CYLINDER/AXIS) IMPLANTABLE COLLAMER LENS INTO THE PATIENT'S RIGHT EYE (OD). THE SURGEON REPORTS LENS ROTATION AND REFRACTIVE SURPRISE. LENS REMAINS IMPLANTED. ATTEMPTS TO OBTAIN ADDITIONAL INFORMATION HAVE NOT BEEN SUCCESSFUL. IF ADDITIONAL INFORMATION IS RECEIVED A SUPPLEMENTAL MEDWAT…	Lens Retention	Unknown
https://www.accessdata.fda.gov/scripts/cdrh/cfdocs/cfMAUDE/Detail.CFM?MDRFOI__ID=16075678&pc=QCB	2023826-2022-04747	2022-05-20 04:00:00	Injury	STAAR SURGICAL COMPANY	2022-12-29 05:00:00	QCB	IMPLANTABLE COLLAMER LENS (ICL)	Misfocusing; Off-Label Use; Inadequacy of Device Shape and/or Size	Blurred Vision	NA	NA	1	Event Description: THE REPORTER INDICATED THAT A 12.1MM VTICM512.1 IMPLANTABLE COLLAMER LENS WITH A -6.0/1.0/089 (SPHERE/CYLINDER/AXIS), WAS IMPLANTED AS A REPLACEMENT INTO THE LEFT EYE (OS) OF A PATIENT WITH PRE-EXISTING PROGRESSIVE MYOPIA ON (B)(6) 2022. REPORTEDLY, "LENS TOO BIG. SURGEON PREFERENCE CHANGE." THE PROBLEM WAS NOT RESOLVED. THE REPORTER INDICATED THAT THE DEVICE FAILED TO PERFORM …	Lens Extraction	Resolved
https://www.accessdata.fda.gov/scripts/cdrh/cfdocs/cfMAUDE/Detail.CFM?MDRFOI__ID=16075681&pc=QCB	2023826-2022-04746	2022-01-26 05:00:00	Injury	STAAR SURGICAL COMPANY	2022-12-29 05:00:00	QCB	IMPLANTABLE COLLAMER LENS (ICL)	Misfocusing; Off-Label Use; Inadequacy of Device Shape and/or Size	Blurred Vision	NA	NA	1	Event Description: THE REPORTER INDICATED THAT A 12.6MM VTICM512.6 IMPLANTABLE COLLAMER LENS WITH A -6.0/1.0/107 (SPHERE/CYLINDER/AXIS), WAS IMPLANTED INTO THE LEFT EYE (OS) OF A PATIENT WITH PRE-EXISTING PROGRESSIVE MYOPIA ON (B)(6) 2022. ON (B)(6) 2022, THE LENS WAS EXCHANGED FOR A SMALLER LENGTH LENS. REPORTEDLY, "LENS TOO BIG. SURGEON PREFERENCE CHANGE." THE PROBLEM WAS NOT RESOLVED. THE REPO…	Lens Exchange	Not_Resolved
https://www.accessdata.fda.gov/scripts/cdrh/cfdocs/cfMAUDE/Detail.CFM?MDRFOI__ID=16077729&pc=QCB	2023826-2022-04792	2022-04-23 04:00:00	Injury	STAAR SURGICAL COMPANY	2022-12-30 05:00:00	QCB	IMPLANTABLE COLLAMER LENS (ICL)	Misfocusing; Off-Label Use	Blurred Vision	P030016	NA	1	Event Description: THE REPORTER INDICATED THAT A 12.6MM VTICMO12.6 -6.5/1.5/11 (SPHERE/CYLINDER/AXIS) IMPLANTABLE COLLAMER LENS WAS IMPLANTED INTO THE PATIENT'S RIGHT EYE (OD) ON (B)(6) 2022. ON (B)(6) 2022 THE LENS WAS EXPLANTED DUE TO REFRACTIVE SURPRISE. A LENS OF DIFFERENT POWER WAS LATER IMPLANTED AND THE PROBLEM RESOLVED. CAUSE OF EVENT WAS REPORTED AS UNKNOWN. Manufacturer Narrative: ADDIT…	Lens Exchange	Resolved
https://www.accessdata.fda.gov/scripts/cdrh/cfdocs/cfMAUDE/Detail.CFM?MDRFOI__ID=16099355&pc=QCB	2023826-2023-00083	2022-10-22 04:00:00	Injury	STAAR SURGICAL COMPANY	2023-01-04 05:00:00	QCB	IMPLANTABLE COLLAMER LENS (ICL)	Misfocusing	Blurred Vision	P030016	NA	1	Event Description: THE REPORTER INDICATED THAT THE SURGEON IMPLANTED A 13.2MM VTICMO13.2; -13/1.5/173 (SPHERE/CYLINDER/AXIS) IMPLANTABLE COLLAMER LENS INTO THE PATIENT'S RIGHT EYE (OD) ON (B)(6) 2022. THE PATIENT EXPERIENCED REFRACTIVE SURPRISE. ON (B)(6) 2022 THE LENS WAS EXPLANTED AND LATER ON THIS SAME DATE IN A SEPARATE SURGERY A REPLACEMENT LENS OF THE SAME LENGTH BUT DIFFERENT POWER WAS IMP…	Lens Exchange	Resolved
https://www.accessdata.fda.gov/scripts/cdrh/cfdocs/cfMAUDE/Detail.CFM?MDRFOI__ID=16112609&pc=QCB	2023826-2023-00079	NA	Malfunction	STAAR SURGICAL COMPANY	2023-01-06 05:00:00	QCB	IMPLANTABLE COLLAMER LENS (ICL)	Misfocusing	Blurred Vision	P030016	NA	1	Event Description: THE REPORTER INDICATED THAT A 13.7MM VTICM5_13.7 IMPLANTABLE COLLAMER LENS OF -0.50/6.00/134 (SPHERE/CYLINDER/AXIS) WAS IMPLANTED INTO THE PATIENT'S RIGHT EYE (OD) ON (B)(6)2022. REFRACTIVE SURPRISE WAS REPORTED, LENS REMAINS IMPLANTED. THE REPORTER STATED THAT THE EYE IS QUIET. IT WAS REPORTED THAT VISION IS 20/60 UNDILATED WITH A VAULT OF 660 AND 20/30 DILATED WITH A VAULT OF…	Lens Retention	Unknown
https://www.accessdata.fda.gov/scripts/cdrh/cfdocs/cfMAUDE/Detail.CFM?MDRFOI__ID=16113739&pc=QCB	2023826-2023-00081	2022-10-19 04:00:00	Injury	STAAR SURGICAL COMPANY	2023-01-06 05:00:00	QCB	IMPLANTABLE COLLAMER LENS (ICL)	Misfocusing	Blurred Vision	P030016	NA	1	Event Description: THE REPORTER INDICATED THAT A 12.6MM VTICMO12.6 IMPLANTABLE COLLAMER LENS OF -11.0/2.0/167 (SPHERE/CYLINDER/AXIS) WAS IMPLANTED INTO THE PATIENT'S LEFT EYE (OS) ON (B)(6) 2022. ON (B)(6) 2022 THE LENS WAS EXCHANGED FOR A DIFFERENT POWER LENS DUE TO REFRACTIVE SURPRISE. THE EXCHANGE RESOLVED THE PROBLEM. Manufacturer Narrative: NO SIMILAR COMPLAINT TYPE EVENTS REPORTED FOR UNITS…	Lens Exchange	Resolved
https://www.accessdata.fda.gov/scripts/cdrh/cfdocs/cfMAUDE/Detail.CFM?MDRFOI__ID=16117774&pc=QCB	2023826-2023-00054	2022-12-07 05:00:00	Injury	STAAR SURGICAL COMPANY	2023-01-06 05:00:00	QCB	IMPLANTABLE COLLAMER LENS (ICL)	Misfocusing; Improper or Incorrect Procedure or Method	Blurred Vision	P030016	NA	1	Event Description: THE REPORTER INDICATED THAT A 13.2MM VTICM513.2 IMPLANTABLE COLLAMER LENS OF -8.5/2.0/130 (SPHERE/CYLINDER/AXIS) WAS IMPLANTED IN THE PATIENT'S LEFT EYE (OS) ON (B)(6) 2022. REFRACTIVE CHANGE OVERTIME WAS OBSERVED. CAUSE OF THE EVENT WAS USER ERROR. REPORTEDLY, "SURGEON USED WRONG DATAS FOR CALCULATION IN OCOS, DATA FOR OD USED FOR OS. Manufacturer Narrative: CORRECTED DATA: B1…	Lens Exchange	Unknown
https://www.accessdata.fda.gov/scripts/cdrh/cfdocs/cfMAUDE/Detail.CFM?MDRFOI__ID=16117832&pc=QCB	2023826-2023-00053	2022-12-07 05:00:00	Injury	STAAR SURGICAL COMPANY	2023-01-06 05:00:00	QCB	IMPLANTABLE COLLAMER LENS (ICL)	Misfocusing; Off-Label Use	Blurred Vision	P030016	NA	1	Event Description: THE REPORTER INDICATED THAT A 13.2MM VTICM513.2 IMPLANTABLE COLLAMER LENS OF -8.5/2.5/78 (SPHERE/CYLINDER/AXIS) WAS IMPLANTED IN THE PATIENT'S RIGHT EYE (OD) ON (B)(6) 2022. REFRACTIVE CHANGE OVERTIME WAS OBSERVED. CAUSE OF THE EVENT WAS USER ERROR. REPORTEDLY, "SURGEON USED WRONG DATAS FOR CALCULATION IN OCOS, DATA FOR OS USED FOR OD. Manufacturer Narrative: B1: ADVERSE EVENT …	Lens Exchange	Unknown
https://www.accessdata.fda.gov/scripts/cdrh/cfdocs/cfMAUDE/Detail.CFM?MDRFOI__ID=16141698&pc=QCB	2023826-2023-00120	2022-10-04 04:00:00	Injury	STAAR SURGICAL COMPANY	2023-01-11 05:00:00	QCB	IMPLANTABLE COLLAMER LENS (ICL)	Misfocusing; Inadequacy of Device Shape and/or Size; Adverse Event Without Identified Device or Use Problem	Blurred Vision	P030016	NA	1	Event Description: IT WAS REPORTED THAT A 13.2MM, VTICM513.2, -7.50/3.0/085 (SPHERE/CYLINDER/AXIS), IMPLANTABLE COLLAMER LENS WAS IMPLANTED INTO THE PATIENTS RIGHT EYE (OD) ON (B)(6) 2022. THE PATIENT EXPERIENCED EXCESSIVE VAULT AND REFRACTIVE SURPRISE. LENS REMAINS IMPLANTED. CAUSE OF EVENT WAS UNKNOWN. IF ADDITIONAL INFORMATION IS RECEIVED A SUPPLEMENTAL MEDWATCH REPORT WILL BE SUBMITTED. Manuf…	Lens Exchange	Resolved
https://www.accessdata.fda.gov/scripts/cdrh/cfdocs/cfMAUDE/Detail.CFM?MDRFOI__ID=16142821&pc=QCB	2023826-2023-00123	2022-10-04 04:00:00	Injury	STAAR SURGICAL COMPANY	2023-01-11 05:00:00	QCB	IMPLANTABLE COLLAMER LENS (ICL)	Misfocusing	Blurred Vision	P030016	NA	1	Event Description: THE REPORTER INDICATED THAT A 13.2MM VTICM5 13.2 IMPLANTABLE COLLAMER LENS OF -3.50/1.0/89 (SPHERE/CYLINDER/AXIS) WAS IMPLANTED INTO THE PATIENT'S LEFT EYE (OS) ON (B)(6) 2022. REFRACTIVE SURPRISE WAS OBSERVED. ON (B)(6) 2022 THE LENS WAS REMOVED AND ON THE SAME DAY DIFFERENT SURGERY SIZE BUT A DIFFERENT MODEL AND POWER LENS WAS IMPLANTED. THE REPLACEMENT LENS RESOLVED THE PROB…	Lens Exchange	Resolved
https://www.accessdata.fda.gov/scripts/cdrh/cfdocs/cfMAUDE/Detail.CFM?MDRFOI__ID=16142822&pc=QCB	2023826-2023-00124	2022-09-04 04:00:00	Injury	STAAR SURGICAL COMPANY	2023-01-11 05:00:00	QCB	IMPLANTABLE COLLAMER LENS (ICL)	Misfocusing	Blurred Vision	P030016	NA	1	Event Description: THE REPORTER INDICATED THAT A 12.1MM VTICM5 12.1 IMPLANTABLE COLLAMER LENS OF -10.0/1.50/90 (SPHERE/CYLINDER/AXIS) WAS IMPLANTED INTO THE PATIENT'S LEFT EYE (OS) ON (B)(6) 2022. REFRACTIVE SURPRISE WAS OBSERVED. ON (B)(6) 2022 THE LENS WAS REMOVED. ON A LATER DATE A REPLACEMENT LENS OF LONGER LENGTH AND DIFFERENT POWER WAS IMPLANTED AND THE PROBLEM WAS RESOLVED. CAUSE REPORTED …	Lens Exchange	Resolved
https://www.accessdata.fda.gov/scripts/cdrh/cfdocs/cfMAUDE/Detail.CFM?MDRFOI__ID=16153694&pc=QCB	2023826-2023-00107	NA	Injury	STAAR SURGICAL COMPANY	2023-01-12 05:00:00	QCB	IMPLANTABLE COLLAMER LENS (ICL)	Misfocusing	Blurred Vision	P030016	NA	1	Event Description: THE REPORTER INDICATED THAT A 13.2MM VTICM513.2 IMPLANTABLE COLLAMER LENS OF -3.0/2.0/024 (SPHERE/CYLINDER/AXIS) WAS IMPLANTED IN THE PATIENT'S RIGHT EYE (OD) ON (B)(6)2022. REFRACTIVE SURPRISE WAS OBSERVED. CAUSE OF THE EVENT WAS USER UNKNOWN. LENS REMAINS IMPLANTED. Manufacturer Narrative: ADDITIONAL INFORMATION: B5: THE REPORTER INDICATED THAT A 13.2MM VTICM513.2 IMPLANTABLE…	Lens Repositioning	Resolved
https://www.accessdata.fda.gov/scripts/cdrh/cfdocs/cfMAUDE/Detail.CFM?MDRFOI__ID=16154820&pc=QCB	2023826-2023-00130	2022-07-04 04:00:00	Injury	STAAR SURGICAL COMPANY	2023-01-12 05:00:00	QCB	IMPLANTABLE COLLAMER LENS (ICL)	Misfocusing	Blurred Vision	P030016	NA	1	Event Description: THE REPORTER INDICATED THAT A 12.1MM VTICM5 12.1 IMPLANTABLE COLLAMER LENS OF -10.50/2.00/091 (SPHERE/CYLINDER/AXIS) WAS IMPLANTED INTO THE PATIENT'S LEFT EYE (OS) ON (B)(6) 2022. REFRACTIVE SURPRISE WAS OBSERVED. ON (B)(6) 2022 THE LENS WAS EXCHANGED FOR A SAME MODEL AND SIZE BUT DIFFERENT DIOPTER LENS. THE REPLACEMENT LENS RESOLVED THE PROBLEM. CAUSE REPORTED AS USER ERROR. D…	Lens Exchange	Resolved
https://www.accessdata.fda.gov/scripts/cdrh/cfdocs/cfMAUDE/Detail.CFM?MDRFOI__ID=16189407&pc=QCB	2023826-2023-00173	2022-10-20 04:00:00	Malfunction	STAAR SURGICAL COMPANY	2023-01-17 05:00:00	QCB	IMPLANTABLE COLLAMER LENS (ICL)	Misfocusing	Blurred Vision	P030016	NA	1	Event Description: THE REPORTER INDICATED THAT THE SURGEON IMPLANTED A 13.2MM VTICM5_13.2; -7.50/+3.50/97 (SPHERE/CYLINDER/AXIS) IMPLANTABLE COLLAMER LENS INTO THE PATIENT'S RIGHT EYE (OD) ON (B)(6)2022. THE PATIENT EXPERIENCED REFRACTIVE SURPRISE. IT WAS ADDITIONALLY NOTED THAT CALCULATION IS BEING DONE IN PLAN TO REPOSITION THE LENS. LENS REMAINS IMPLANTED. THE PROBLEM IS REPORTED AS NOT RESOLV…	Lens Retention	Not_Resolved
https://www.accessdata.fda.gov/scripts/cdrh/cfdocs/cfMAUDE/Detail.CFM?MDRFOI__ID=16189410&pc=QCB	2023826-2023-00199	2022-10-20 04:00:00	Malfunction	STAAR SURGICAL COMPANY	2023-01-17 05:00:00	QCB	IMPLANTABLE COLLAMER LENS (ICL)	Misfocusing	Blurred Vision	P030016	NA	1	Event Description: THE REPORTER INDICATED THAT THE SURGEON IMPLANTED A 12.6MM VTICM5_12.6; -9.00/3.50/64 (SPHERE/CYLINDER/AXIS) IMPLANTABLE COLLAMER LENS INTO THE LEFT RIGHT EYE (OS) ON (B)(6) 2022. THE PATIENT EXPERIENCED REFRACTIVE SURPRISE. IT WAS ADDITIONALLY NOTED THAT CALCULATION IS BEING DONE IN PLAN TO REPOSITION THE LENS. LENS REMAINS IMPLANTED. THE PROBLEM IS REPORTED AS NOT RESOLVED. M…	Lens Retention	Not_Resolved
https://www.accessdata.fda.gov/scripts/cdrh/cfdocs/cfMAUDE/Detail.CFM?MDRFOI__ID=16199991&pc=QCB	2023826-2023-00202	2022-12-15 05:00:00	Malfunction	STAAR SURGICAL COMPANY	2023-01-18 05:00:00	QCB	IMPLANTABLE COLLAMER LENS (ICL)	Misfocusing	Blurred Vision	P030016	NA	1	Event Description: THE REPORTER INDICATED THAT A 13.2MM VTICM5_13.2 IMPLANTABLE COLLAMER LENS OF -4.50/1.5/117 (SPHERE/CYLINDER/AXIS) WAS IMPLANTED INTO THE PATIENT'S RIGHT EYE (OD) ON (B)(6) 2022. THE PATIENT EXPERIENCED REFRACTIVE SURPRISE, LENS REMAINS IMPLANTED. IF ADDITIONAL INFORMATION IS RECEIVED A SUPPLEMENTAL MEDWATCH REPORT WILL BE SUBMITTED. Manufacturer Narrative: H6 - HEALTH EFFECT -…	Lens Retention	Unknown
https://www.accessdata.fda.gov/scripts/cdrh/cfdocs/cfMAUDE/Detail.CFM?MDRFOI__ID=16199992&pc=QCB	2023826-2023-00203	2022-12-14 05:00:00	Injury	STAAR SURGICAL COMPANY	2023-01-18 05:00:00	QCB	IMPLANTABLE COLLAMER LENS (ICL)	Misfocusing	Blurred Vision	P030016	NA	1	Event Description: THE REPORTER INDICATED THAT A 13.7MM VTICM13.7 IMPLANTABLE COLLAMER LENS OF -13.50/4.00/85 (SPHERE/CYLINDER/AXIS) WAS IMPLANTED INTO THE PATIENT'S LEFT EYE (OS) ON (B)(6) 2022. THE PATIENT EXPERIENCED REFRACTIVE CHANGE OVERTIME. PER UPDATED INFORMATION THE LENS WAS ROTATED ON (B)(6) 2022 AND THE PATIENT NOW HAS 1.2 VA. IT WAS REPORTED THAT THE PROBLEM WAS RESOLVED AFTER THE LEN…	Lens Repositioning	Resolved
https://www.accessdata.fda.gov/scripts/cdrh/cfdocs/cfMAUDE/Detail.CFM?MDRFOI__ID=16210693&pc=QCB	2023826-2023-00244	2022-11-25 05:00:00	Malfunction	STAAR SURGICAL COMPANY	2023-01-19 05:00:00	QCB	IMPLANTABLE COLLAMER LENS (ICL)	Misfocusing; Off-Label Use	Blurred Vision	P030016	NA	1	Event Description: THE REPORTER INDICATED THAT THE SURGEON IMPLANTED A 12.6MM VTICM5_12.6; -1/+1/083 (SPHERE/CYLINDER/AXIS) IMPLANTABLE COLLAMER LENS INTO THE PATIENT'S LEFT EYE (OS) ON (B)(6) 2022. THE SURGEON REPORTS THE PATIENT HAS REFRACTIVE SURPRISE. IT WAS ADDITIONALLY NOTED "UDVA IS NOT SUFFICIENT DUE TO RESIDUAL MYOPIA AND ASTIGMATISM. WE SHOULD REPLACE THE ICL". LENS REMAINS IMPLANTED. T…	Lens Retention	Not_Resolved
https://www.accessdata.fda.gov/scripts/cdrh/cfdocs/cfMAUDE/Detail.CFM?MDRFOI__ID=16214291&pc=QCB	2023826-2023-00204	2022-12-13 05:00:00	Injury	STAAR SURGICAL COMPANY	2023-01-20 05:00:00	QCB	IMPLANTABLE COLLAMER LENS (ICL)	Misfocusing; Adverse Event Without Identified Device or Use Problem	Blurred Vision	P030016	NA	1	Event Description: THE REPORTER INDICATED THAT A 13.7MM, VTICM5_13.7, -1.50/2.0/174 (SPHERE/CYLINDER/AXIS), IMPLANTABLE COLLAMER LENS WAS IMPLANTED INTO THE PATIENTS LEFT EYE (OS) ON(B)(6)2022. REFRACTIVE SURPRISE WAS OBSERVED, LENS REMAINS IMPLANTED. CAUSE OF EVENT WAS UNKNOWN. IF ADDITIONAL INFORMATION IS RECEIVED A SUPPLEMENTAL MEDWATCH REPORT WILL BE SUBMITTED. Manufacturer Narrative: ADDITIO…	Lens Exchange	Resolved
https://www.accessdata.fda.gov/scripts/cdrh/cfdocs/cfMAUDE/Detail.CFM?MDRFOI__ID=16219689&pc=QCB	2023826-2023-00251	2022-12-15 05:00:00	Malfunction	STAAR SURGICAL COMPANY	2023-01-20 05:00:00	QCB	IMPLANTABLE COLLAMER LENS (ICL)	Misfocusing	Blurred Vision	P030016	NA	1	Event Description: THE REPORTER INDICATED THAT A 12.6MM VTICM5 12.6 IMPLANTABLE COLLAMER LENS OF -10.00/2.5/112 (SPHERE/CYLINDER/AXIS) WAS IMPLANTED INTO THE PATIENTS RIGHT EYE (OD) ON (B)(6) 2022. REFRACTIVE SURPRISE WAS OBSERVED.THE LENS REMAINS IMPLANTED. CAUSE REPORTED AS OTHER. DEVICE DID NOT FAULT O PERFORM AS INTENDED. "THERE WAS A MISUNDERSTANDING ABOUT ALIGNMENT." IF ADDITIONAL INFORMATI…	Lens Retention	Unknown
https://www.accessdata.fda.gov/scripts/cdrh/cfdocs/cfMAUDE/Detail.CFM?MDRFOI__ID=16248972&pc=QCB	2023826-2023-00337	2022-08-31 04:00:00	Injury	STAAR SURGICAL COMPANY	2023-01-26 05:00:00	QCB	IMPLANTABLE COLLAMER LENS (ICL)	Misfocusing	Blurred Vision	P030016	NA	1	Event Description: THE REPORTER INDICATED THAT A 12.6MM VTICM5_12.6 IMPLANTABLE COLLAMER LENS OF -8.0/2.0/093 (SPHERE/CYLINDER/AXIS) WAS IMPLANTED INTO THE PATIENT'S RIGHT EYE (OD) ON (B)(6) 2022. ON (B)(6) 2022 THE LENS WAS EXCHANGED FOR A DIFFERENT POWER LENS DUE TO REFRACTIVE SURPRISE. THE EXCHANGE DID NOT RESOLVED THE PROBLEM. CAUSE IS REPORTED AS UNKNOWN. Manufacturer Narrative: DEVICE EVALU…	Lens Exchange	Not_Resolved
https://www.accessdata.fda.gov/scripts/cdrh/cfdocs/cfMAUDE/Detail.CFM?MDRFOI__ID=16249317&pc=QCB	2023826-2023-00338	NA	Malfunction	STAAR SURGICAL COMPANY	2023-01-26 05:00:00	QCB	IMPLANTABLE COLLAMER LENS (ICL)	Misfocusing	Blurred Vision	P030016	NA	1	Event Description: THE REPORTER INDICATED THAT A 12.6MM VTICM5_12.6 IMPLANTABLE COLLAMER LENS OF -8.5/3.0/095 (SPHERE/CYLINDER/AXIS) WAS IMPLANTED INTO THE PATIENT'S RIGHT EYE (OD) ON (B)(6) 2022 AS A REPLACEMENT LENS TO ADDRESS REFRACTIVE SURPRISE BUT IT DID NOT RESOLVED THE PROBLEM. ADDITIONAL INFORMATION HAS BEEN REQUESTED BUT NONE HAS BEEN FORTHCOMING. IF ADDITIONAL INFORMATION IS RECEIVED A …	Lens Retention	Unknown
https://www.accessdata.fda.gov/scripts/cdrh/cfdocs/cfMAUDE/Detail.CFM?MDRFOI__ID=16297884&pc=QCB	2023826-2023-00435	NA	Injury	STAAR SURGICAL COMPANY	2023-02-03 05:00:00	QCB	IMPLANTABLE COLLAMER LENS (ICL)	Inadequacy of Device Shape and/or Size; Device Dislodged or Dislocated	Blurred Vision	P030016	NA	1	Event Description: THE REPORTER INDICATED THAT A 12.1MM, VTICMO12.1, -2.50/5.5/159 (SPHERE/CYLINDER/AXIS), IMPLANTABLE COLLAMER LENS WAS IMPLANTED INTO THE PATIENTS RIGHT EYE (OD) ON (B)(6) 2022. THE LENS WAS EXPLANTED DUE TO LOW VAULT WITH ROTATION AND BAD VISION. ON (B)(6) 2023 A REPLACEMENT LENS OF LONGER LENGTH WAS IMPLANTED. IT WAS REPORTED THAT THE PROBLEM RESOLVED. Manufacturer Narrative: …	Lens Exchange	Resolved
https://www.accessdata.fda.gov/scripts/cdrh/cfdocs/cfMAUDE/Detail.CFM?MDRFOI__ID=16300819&pc=QCB	2023826-2023-00440	2022-12-19 05:00:00	Injury	STAAR SURGICAL COMPANY	2023-02-04 05:00:00	QCB	IMPLANTABLE COLLAMER LENS (ICL)	Misfocusing	Blurred Vision	P030016	NA	1	Event Description: THE REPORTER INDICATED THAT THE SURGEON IMPLANTED A 12.6MM VTICMO12.6; -13.00/1.50/133 (SPHERE/CYLINDER/AXIS) IMPLANTABLE COLLAMER LENS INTO THE PATIENT'S RIGHT EYE (OD) ON (B)(6) 2022. THE PATIENT EXPERIENCED REFRACTIVE CHANGE OVER TIME. ON (B)(6) 2022 THE LENS WAS EXCHANGED WITH A SAME LENGTH LENS BUT DIFFERENT POWER. THIS RESOLVED THE PROBLEM. THE CAUSE OF THE EVENT WAS REPO…	Lens Exchange	Resolved
https://www.accessdata.fda.gov/scripts/cdrh/cfdocs/cfMAUDE/Detail.CFM?MDRFOI__ID=16301296&pc=QCB	2023826-2023-00442	2021-10-27 04:00:00	Malfunction	STAAR SURGICAL COMPANY	2023-02-04 05:00:00	QCB	IMPLANTABLE COLLAMER LENS (ICL)	Misfocusing; Device Dislodged or Dislocated	Blurred Vision	P030016	NA	1	Event Description: THE REPORTER INDICATED THAT A 13.2MM, VTICMO13.2, -14.50/2.0/094 (SPHERE/CYLINDER/AXIS) IMPLANTABLE COLLAMER LENS WAS IMPLANTED INTO THE PATIENTS LEFT EYE (OS) ON (B)(6)2021. LENS ROTATION NOT ASSOCIATED TO A LOW VAULT AND REFRACTIVE SURPRISE WAS OBSERVED, LENS REMAINS IMPLANTED. CAUSE OF EVENT WAS UNKNOWN. ADDITIONAL INFORMATION HAS BEEN REQUESTED BUT NONE HAS BEEN FORTHCOMING…	Lens Retention	Unknown
https://www.accessdata.fda.gov/scripts/cdrh/cfdocs/cfMAUDE/Detail.CFM?MDRFOI__ID=16328105&pc=QCB	2023826-2023-00380	2022-04-26 04:00:00	Injury	STAAR SURGICAL COMPANY	2023-02-08 05:00:00	QCB	IMPLANTABLE COLLAMER LENS (ICL)	Misfocusing	Blurred Vision	P030016	NA	1	Event Description: THE REPORTER INDICATED THAT A 12.1MM VTICMO12.1 IMPLANTABLE COLLAMER LENS OF -15.0/3.0/074 (SPHERE/CYLINDER/AXIS) WAS IMPLANTED INTO THE PATIENT'S LEFT EYE (OS) ON (B)(6) 2021. ON (B)(6)2022, THE LENS WAS EXCHANGED FOR A LONGER LENGTH LENS, IMPLANTED VERTICALLY DUE TO REFRACTIVE SURPRISE. THE PROBLEM WAS RESOLVED. CAUSE OF THE EVENT IS UNKNOWN. Manufacturer Narrative: WORK ORDE…	Lens Exchange	Resolved
https://www.accessdata.fda.gov/scripts/cdrh/cfdocs/cfMAUDE/Detail.CFM?MDRFOI__ID=16343807&pc=QCB	2023826-2023-00390	2023-01-06 05:00:00	Malfunction	STAAR SURGICAL COMPANY	2023-02-09 05:00:00	QCB	IMPLANTABLE COLLAMER LENS (ICL)	Misfocusing	Blurred Vision	P030016	NA	1	Event Description: THE REPORTER INDICATED THAT A 12.6MM VTICM5 12.6 IMPLANTABLE COLLAMER LENS OF -10.00/4.5/089 (SPHERE/CYLINDER/AXIS) WAS IMPLANTED INTO THE PATIENTS LEFT EYE (OS) ON (B)(6) 2022. REFRACTIVE SURPRISE WAS OBSERVED. THE LENS REMAINS IMPLANTED. ATTEMPTS TO OBTAIN ADDITIONAL INFORMATION HAVE NOT BEEN SUCCESSFUL. IF ADDITIONAL INFORMATION IS RECEIVED A SUPPLEMENTAL MEDWATCH REPORT WIL…	Lens Retention	Unknown
https://www.accessdata.fda.gov/scripts/cdrh/cfdocs/cfMAUDE/Detail.CFM?MDRFOI__ID=16343985&pc=QCB	2023826-2023-00391	2023-01-04 05:00:00	Malfunction	STAAR SURGICAL COMPANY	2023-02-09 05:00:00	QCB	IMPLANTABLE COLLAMER LENS (ICL)	Misfocusing; Inadequacy of Device Shape and/or Size	Blurred Vision	P030016	NA	1	Event Description: THE REPORTER INDICATED THAT A 12.6MM VTICM 12.6 IMPLANTABLE COLLAMER LENS OF -10.50/1.50/058 (SPHERE/CYLINDER/AXIS) WAS IMPLANTED INTO THE PATIENTS RIGHT EYE (OD) ON (B)(6) 2012. LOW VAULT WITH REFRACTIVE SURPRISE WAS OBSERVED. THE LENS REMAINS IMPLANTED. NO FURTHER INFORMATION HAS BEEN PROVIDED. ATTEMPTS TO OBTAIN ADDITIONAL INFORMATION HAVE NOT BEEN SUCCESSFUL. IF ADDITIONAL …	Lens Retention	Unknown
https://www.accessdata.fda.gov/scripts/cdrh/cfdocs/cfMAUDE/Detail.CFM?MDRFOI__ID=16344319&pc=QCB	2023826-2023-00402	2022-08-15 04:00:00	Injury	STAAR SURGICAL COMPANY	2023-02-09 05:00:00	QCB	IMPLANTABLE COLLAMER LENS (ICL)	Misfocusing; Off-Label Use	Blurred Vision	P030016	NA	1	Event Description: THE REPORTER INDICATED THAT A 13.2MM VTICM513.2 IMPLANTABLE COLLAMER LENS OF -4.5/2.0/83 (SPHERE/CYLINDER/AXIS) WAS IMPLANTED INTO THE PATIENT'S LEFT EYE (OS) ON (B)(6) 2022. ON (B)(6) 2022, THE LENS WAS EXCHANGED FOR A REPLACEMENT LENS DUE TO REFRACTIVE SURPRISE AND THE PROBLEM WAS RESOLVED. Manufacturer Narrative: H3 - DEVICE EVALUATION: THE LENS WAS RETURNED DRY WITH RESIDUE…	Lens Exchange	Resolved
https://www.accessdata.fda.gov/scripts/cdrh/cfdocs/cfMAUDE/Detail.CFM?MDRFOI__ID=16359096&pc=QCB	2023826-2023-00487	2023-01-13 05:00:00	Injury	STAAR SURGICAL COMPANY	2023-02-10 05:00:00	QCB	IMPLANTABLE COLLAMER LENS (ICL)	Misfocusing	Blurred Vision	P030016	NA	1	Event Description: THE REPORTER INDICATED THAT A 13.2MMVTICM5 13.2 IMPLANTABLE COLLAMER LENS OF -9.5/2.5/87(SPHERE/CYLINDER/AXIS) WAS IMPLANTED INTO THE PATIENTS RIGHT EYE (OD)ON (B)(6) 2022. REFRACTIVE SURPRISE WAS OBSERVED. THE LENS REMAINS IMPLANTED. ATTEMPTS TO OBTAIN ADDITIONAL INFORMATION HAVE NOT BEEN SUCCESSFUL. IF ADDITIONAL INFORMATION IS RECEIVED A SUPPLEMENTAL MEDWATCH REPORT WILL BE …	Lens Exchange	Resolved
https://www.accessdata.fda.gov/scripts/cdrh/cfdocs/cfMAUDE/Detail.CFM?MDRFOI__ID=16376165&pc=QCB	2023826-2023-00563	2022-12-13 05:00:00	Injury	STAAR SURGICAL COMPANY	2023-02-14 05:00:00	QCB	IMPLANTABLE COLLAMER LENS (ICL)	Misfocusing; Inadequacy of Device Shape and/or Size	Blurred Vision	P030016	NA	1	Event Description: THE REPORTER INDICATED THAT THE SURGEON IMPLANTED A 12.6MM VTICMO12.6; -10.5/1.0/069 (SPHERE/CYLINDER/AXIS) IMPLANTABLE COLLAMER LENS INTO THE PATIENT'S LEFT EYE (OS) ON (B)(6) 2022. THE SURGEON REPORTS LOW VAULTING AND REFRACTIVE SURPRISE. ON (B)(6) 2022 THE LENS WAS EXCHANGED WITH A LONGER LENGTH LENS DIFFERENT POWER; THIS RESOLVED THE PROBLEM. THE CAUSE OF THE EVENT WAS REPO…	Lens Exchange	Resolved
https://www.accessdata.fda.gov/scripts/cdrh/cfdocs/cfMAUDE/Detail.CFM?MDRFOI__ID=16385392&pc=QCB	2023826-2023-00561	2023-01-04 05:00:00	Injury	STAAR SURGICAL COMPANY	2023-02-16 05:00:00	QCB	IMPLANTABLE COLLAMER LENS (ICL)	Misfocusing; Off-Label Use; Inadequacy of Device Shape and/or Size	Blurred Vision	NA	NA	1	Event Description: THE REPORTER INDICATED THAT A 12.6MM VTICMO12.6 IMPLANTABLE COLLAMER LENS OF -12.5/1.5/087 (SPHERE/CYLINDER/AXIS) WAS IMPLANTED INTO THE PATIENT'S LEFT EYE (OS) ON (B)(6) 2023. ON (B)(6) 2023 THE LENS WAS EXCHANGED FOR A LONGER LENGTH LENS OF DIFFERENT POWER DUE TO LOW VAULT AND REFRACTIVE SURPRISE. THE EXCHANGE RESOLVED THE PROBLEM. CAUSE OF EVENT WAS UNKNOWN. Manufacturer Nar…	Lens Exchange	Resolved
https://www.accessdata.fda.gov/scripts/cdrh/cfdocs/cfMAUDE/Detail.CFM?MDRFOI__ID=16390126&pc=QCB	2023826-2023-00591	2022-09-30 04:00:00	Injury	STAAR SURGICAL COMPANY	2023-02-16 05:00:00	QCB	IMPLANTABLE COLLAMER LENS (ICL)	Misfocusing	Blurred Vision	P030016	NA	1	Event Description: THE REPORTER INDICATED THAT A 12.6MM VTICMO 12.6 IMPLANTABLE COLLAMER LENS OF -15.0/2.0/089 (SPHERE/CYLINDER/AXIS) WAS IMPLANTED INTO THE PATIENTS LEFT EYE (OS) ON (B)(6) 2022. ON (B)(6) 2022 THE LENS WAS EXCHANGED FOR A SHORTER LENGTH LENS DUE TO EXCESSIVE VAULT AND REFRACTIVE SURPRISE. THE EXCHANGE RESOLVED THE PROBLEM. Manufacturer Narrative: INVESTIGATION TYPE 4110: LENS WO…	Lens Exchange	Resolved
https://www.accessdata.fda.gov/scripts/cdrh/cfdocs/cfMAUDE/Detail.CFM?MDRFOI__ID=16390268&pc=QCB	2023826-2023-00592	2022-09-30 04:00:00	Injury	STAAR SURGICAL COMPANY	2023-02-16 05:00:00	QCB	IMPLANTABLE COLLAMER LENS (ICL)	Misfocusing	Blurred Vision	P030016	NA	1	Event Description: THE REPORTER INDICATED THAT A 12.6MM VTICMO 12.6 IMPLANTABLE COLLAMER LENS OF -12.5/2.0/094 (SPHERE/CYLINDER/AXIS) WAS IMPLANTED INTO THE PATIENTS RIGHT EYE (OD) ON (B)(6) 2022. ON (B)(6) 2022 THE LENS WAS EXCHANGED FOR A SHORTER LENGTH LENS DUE TO EXCESSIVE VAULT AND REFRACTIVE SURPRISE. THE EXCHANGE RESOLVED THE PROBLEM. Manufacturer Narrative: H3 - DEVICE EVALUATION: THE LEN…	Lens Exchange	Resolved
https://www.accessdata.fda.gov/scripts/cdrh/cfdocs/cfMAUDE/Detail.CFM?MDRFOI__ID=16406313&pc=QCB	2023826-2023-00599	2022-10-28 04:00:00	Injury	STAAR SURGICAL COMPANY	2023-02-20 05:00:00	QCB	IMPLANTABLE COLLAMER LENS (ICL)	Misfocusing	Blurred Vision	P030016	NA	1	Event Description: THE REPORTER INDICATED THAT A 13.7MM VTICM5 13.7 IMPLANTABLE COLLAMER LENS OF -13.0/1.5/153 (SPHERE/CYLINDER/AXIS) WAS IMPLANTED INTO THE PATIENT'S RIGHT EYE (OD) ON (B)(6) 2020 AS AND EXCHANGE LENS TO RESOLVE LOW VAULT. TRANSIENT LOSS OF BCVA WAS OBSERVED. LENS REMAINS IMPLANTED. "A LASIK TOUCH UP IS PLANNED. SEE MDR # (B)(4) FOR INITIAL LENS. Manufacturer Narrative: B5: CORRE…	Lens Retention + Secondary Operation	Resolved
https://www.accessdata.fda.gov/scripts/cdrh/cfdocs/cfMAUDE/Detail.CFM?MDRFOI__ID=16411082&pc=QCB	2023826-2023-00569	NA	Malfunction	STAAR SURGICAL COMPANY	2023-02-21 05:00:00	QCB	IMPLANTABLE COLLAMER LENS (ICL)	Misfocusing	Blurred Vision	P030016	NA	1	Event Description: THE REPORTER INDICATED THE SURGEON IMPLANTED A 13.2MM TMICL13.2 IMPLANTABLE COLLAMER LENS, -13.50/+2.5/160 (SPHERE/CYLINDER/AXIS), IN THE PATIENTS LEFT EYE (OS) ON (B)(6)2022. POST-OP THE PATIENTS VA WAS BLURRY AND THE LENS REMAINED IMPLANTED. THIS WAS THE REPLACEMENT LENS FOR MFR. REPORT # 2023826-2023-00568. THE PATIENT HAD INTACS IMPLANTED AND WAS USING ARTIFICIAL TEARS. THE…	Lens Retention	Unknown
https://www.accessdata.fda.gov/scripts/cdrh/cfdocs/cfMAUDE/Detail.CFM?MDRFOI__ID=16411155&pc=QCB	2023826-2023-00567	NA	Malfunction	STAAR SURGICAL COMPANY	2023-02-21 05:00:00	QCB	IMPLANTABLE COLLAMER LENS (ICL)	Misfocusing	Blurred Vision	P030016	NA	1	Event Description: THE REPORTER INDICATED THE SURGEON IMPLANTED A 13.2MM TMICL13.2 IMPLANTABLE COLLAMER LENS, -11.50/+3.5/100 (SPHERE/CYLINDER/AXIS), IN THE PATIENTS RIGHT EYE (OD) ON (B)(6)2022. POST-OP THE PATIENTS VA WAS BLURRY. THE LENS REMAINED IMPLANTED. THIS WAS THE REPLACEMENT LENS FOR MFR. REPORT # 2023826-2023-00566. THE PATIENT HAD INTACS IMPLANTED AND WAS USING ARTIFICIAL TEARS. Manuf…	Lens Retention	Unknown
https://www.accessdata.fda.gov/scripts/cdrh/cfdocs/cfMAUDE/Detail.CFM?MDRFOI__ID=16417982&pc=QCB	2023826-2023-00608	2023-01-07 05:00:00	Injury	STAAR SURGICAL COMPANY	2023-02-22 05:00:00	QCB	IMPLANTABLE COLLAMER LENS (ICL)	Misfocusing; Off-Label Use	Blurred Vision	P030016	NA	1	Event Description: THE REPORTER INDICATED THAT A 12.6MM VTICMO 12.6 IMPLANTABLE COLLAMER LENS OF -9.0/1.0/064 (SPHERE/CYLINDER/AXIS) WAS IMPLANTED INTO THE PATIENT'S LEFT EYE (OS) ON (B)(6) 2022. REFRACTIVE SURPRISE WAS OBSERVED. ON (B)(6) 2023 THE LENS WAS EXCHANGED FOR A SAME MODEL AND SIZE BUT DIFFERENT POWER LENS. THE REPLACEMENT LENS RESOLVED THE PROBLEM. Manufacturer Narrative: DEVICE CODE …	Lens Exchange	Resolved
https://www.accessdata.fda.gov/scripts/cdrh/cfdocs/cfMAUDE/Detail.CFM?MDRFOI__ID=16425177&pc=QCB	2023826-2023-00620	NA	Malfunction	STAAR SURGICAL COMPANY	2023-02-23 05:00:00	QCB	IMPLANTABLE COLLAMER LENS (ICL)	Misfocusing	Blurred Vision	P030016	NA	1	Event Description: THE REPORTER INDICATED THAT A 13.2MM VTICH 13.2 IMPLANTABLE COLLAMER LENS OF -3.50/2.5/034 (SPHERE/CYLINDER/AXIS) WAS IMPLANTED INTO THE PATIENT'S EYE. VERY HIGH RESIDUAL ASTIGMATISM WAS PRESENT. A BAROMETRY DEVICE WAS USED WHICH SHOWED THAT THERE WAS NO INTERNAL CYLINDER POWER. ATTEMPTS TO OBTAIN ADDITIONAL INFORMATION HAVE NOT BEEN SUCCESSFUL. IF ADDITIONAL INFORMATION IS REC…	Unknown	Unknown
https://www.accessdata.fda.gov/scripts/cdrh/cfdocs/cfMAUDE/Detail.CFM?MDRFOI__ID=16433883&pc=QCB	2023826-2023-00693	2022-05-23 04:00:00	Malfunction	STAAR SURGICAL COMPANY	2023-02-24 05:00:00	QCB	IMPLANTABLE COLLAMER LENS (ICL)	Misfocusing; Device Dislodged or Dislocated	Blurred Vision	P030016	NA	1	Event Description: THE REPORTER INDICATED THAT A 13.2MM VTICM5_13.2 IMPLANTABLE COLLAMER LENS OF -11.50/6.0/008 (SPHERE/CYLINDER/AXIS) WAS IMPLANTED INTO THE PATIENT'S RIGHT EYE (OD) ON (B)(6) 2022. LENS ROTATION NOT ASSOCIATED TO A LOW VAULT AND REFRACTIVE SURPRISE WAS OBSERVED, LENS REMAINS IMPLANTED. IN THE REPORTER OPINION THE CAUSE OF THIS EVENT IS THE DEVICE. IF ADDITIONAL INFORMATION IS RE…	Lens Retention	Unknown
https://www.accessdata.fda.gov/scripts/cdrh/cfdocs/cfMAUDE/Detail.CFM?MDRFOI__ID=16433993&pc=QCB	2023826-2023-00694	2022-05-23 04:00:00	Malfunction	STAAR SURGICAL COMPANY	2023-02-24 05:00:00	QCB	IMPLANTABLE COLLAMER LENS (ICL)	Misfocusing; Device Dislodged or Dislocated	Blurred Vision	P030016	NA	1	Event Description: THE REPORTER INDICATED THAT A 13.2MM VTICM5_13.2 IMPLANTABLE COLLAMER LENS OF -10.50/5.0/165 (SPHERE/CYLINDER/AXIS) WAS IMPLANTED INTO THE PATIENT'S LEFT EYE (OS) ON (B)(6) 2022. LENS ROTATION NOT ASSOCIATED TO A LOW VAULT AND REFRACTIVE SURPRISE WAS OBSERVED, LENS REMAINS IMPLANTED. IN THE REPORTER OPINION THE CAUSE OF THIS EVENT IS THE DEVICE. IF ADDITIONAL INFORMATION IS REC…	Lens Retention	Unknown
https://www.accessdata.fda.gov/scripts/cdrh/cfdocs/cfMAUDE/Detail.CFM?MDRFOI__ID=16471700&pc=QCB	2023826-2023-00724	2021-12-27 05:00:00	Malfunction	STAAR SURGICAL COMPANY	2023-03-02 05:00:00	QCB	IMPLANTABLE COLLAMER LENS (ICL)	Misfocusing; Inadequacy of Device Shape and/or Size; Device Dislodged or Dislocated	Blurred Vision	P030016	NA	1	Event Description: THE REPORTER INDICATED THAT A 12.6MM VTICM512.6 IMPLANTABLE COLLAMER LENS OF -4.0/4.0/58 (SPHERE/CYLINDER/AXIS) WAS IMPLANTED INTO THE PATIENT'S LEFT EYE (OS) ON (B)(6) 2021. LOW VAULT WITH ROTATION AND REFRACTIVE SUPRISE WERE OBSERVED. Manufacturer Narrative: ADDITIONAL INFORMATION: B5: PATIENT IS FINE WITH THE RESULT. CLAIM# (B)(4). Manufacturer Narrative: WORK ORDER SEARCH F…	Unknown	Unknown
https://www.accessdata.fda.gov/scripts/cdrh/cfdocs/cfMAUDE/Detail.CFM?MDRFOI__ID=16471706&pc=QCB	2023826-2023-00723	2021-12-27 05:00:00	Injury	STAAR SURGICAL COMPANY	2023-03-02 05:00:00	QCB	IMPLANTABLE COLLAMER LENS (ICL)	Misfocusing; Inadequacy of Device Shape and/or Size; Device Dislodged or Dislocated	Blurred Vision	P030016	NA	1	Event Description: THE REPORTER INDICATED THAT A 12.6MM VTICM512.6 IMPLANTABLE COLLAMER LENS OF -5.5/3.5/93 (SPHERE/CYLINDER/AXIS) WAS IMPLANTED INTO THE PATIENT'S RIGHT EYE (OD) ON (B)(6) 2021. LOW VAULT WITH ROTATION AND REFRACTIVE SURPRISE WERE OBSERVED. Manufacturer Narrative: WEIGHT, ETHNICITY, RACE: UNK. WORK ORDER SEARCH FOUND NO SIMILAR COMPLAINTS. CLAIM# (B)(4). Manufacturer Narrative: D…	Lens Exchange	Not_Resolved
https://www.accessdata.fda.gov/scripts/cdrh/cfdocs/cfMAUDE/Detail.CFM?MDRFOI__ID=16492175&pc=QCB	2023826-2023-00779	2022-05-28 04:00:00	Injury	STAAR SURGICAL COMPANY	2023-03-06 05:00:00	QCB	IMPLANTABLE COLLAMER LENS (ICL)	Misfocusing	Blurred Vision	P030016	NA	1	Event Description: THE REPORTER INDICATED THAT A 12.6MM VTICM512.6 IMPLANTABLE COLLAMER LENS OF A -11.5/2.5/170 (SPHERE/CYLIDNER/AXIS) WAS IMPLANTED INTO THE PATIENT'S RIGHT EYE (OD) ON (B)(6) 2022. THE LENS WAS REMOVED ON (B)(6) 2023, AND IN A SUBSEQUENT SURGERY LATER THAT DAY, WAS REPLACED DUE TO REFRACTIVE SURPRISE. THE PROBLEM WAS RESOLVED. THE CAUSE OF THE EVENT IS UNKNOWN. REPORTEDLY, "NO P…	Lens Exchange	Resolved
https://www.accessdata.fda.gov/scripts/cdrh/cfdocs/cfMAUDE/Detail.CFM?MDRFOI__ID=16492446&pc=QCB	2023826-2023-00780	2022-05-28 04:00:00	Injury	STAAR SURGICAL COMPANY	2023-03-06 05:00:00	QCB	IMPLANTABLE COLLAMER LENS (ICL)	Misfocusing	Blurred Vision	P030016	NA	1	Event Description: THE REPORTER INDICATED THAT A 12.6MM VTICM512.6 IMPLANTABLE COLLAMER LENS OF A -13.50/2.5/178 (SPHERE/CYLIDNER/AXIS) WAS IMPLANTED INTO THE PATIENT'S LEFT EYE (OS) ON (B)(6)2022. ON (B)(6) 2023, THE LENS WAS EXCHANGED FOR A REPLACEMENT LENS DUE TO REFRACTIVE SURPRISE. THE PROBLEM WAS RESOLVED. THE CAUSE OF THE EVENT IS UNKNOWN. REPORTEDLY, "POSTOPERATIVE DAY 1 IOP IS HIGH AND I…	Lens Exchange	Resolved
https://www.accessdata.fda.gov/scripts/cdrh/cfdocs/cfMAUDE/Detail.CFM?MDRFOI__ID=16492703&pc=QCB	2023826-2023-00781	2022-09-24 04:00:00	Injury	STAAR SURGICAL COMPANY	2023-03-06 05:00:00	QCB	IMPLANTABLE COLLAMER LENS (ICL)	Misfocusing	Blurred Vision	P030016	NA	1	Event Description: THE REPORTER INDICATED THAT A 12.6MM VTICMO12.6 IMPLANTABLE COLLAMER LENS OF A -16.5/2.0/179 (SPHERE/CYLIDNER/AXIS) WAS IMPLANTED INTO THE PATIENT'S LEFT EYE (OS) ON (B)(6) 2022. ON (B)(6) 2023, THE LENS WAS REMOVED AND REPLACED DUE TO REFRACTIVE SURPRISE. THE PROBLEM WAS RESOLVED. THE CAUSE OF THE EVENT IS UNKNOWN. REPORTEDLY STATUS OF THE EYE IS, "STABLE." Manufacturer Narrat…	Lens Exchange	Resolved
https://www.accessdata.fda.gov/scripts/cdrh/cfdocs/cfMAUDE/Detail.CFM?MDRFOI__ID=16507974&pc=QCB	2023826-2023-00835	2023-01-19 05:00:00	Injury	STAAR SURGICAL COMPANY	2023-03-08 05:00:00	QCB	IMPLANTABLE COLLAMER LENS (ICL)	Misfocusing	Blurred Vision	P030016	NA	1	Event Description: THE REPORTER INDICATED THAT THE SURGEON IMPLANTED A 12.6MM VTICM5_12.6; -7.50/1.50/29 (SPHERE/CYLINDER/AXIS) IMPLANTABLE COLLAMER LENS INTO THE PATIENT'S LEFT EYE (OS) ON (B)(6) 2023. THE SURGEON REPORTS THERE WAS A REFRACTIVE ERROR DUE TO WRONG LENS CALCULATION; AXIS 117 INSTEAD OF 177 WAS USED. ON (B)(6) 2023 THE LENS WAS EXPLANTED. ON THIS SAME DATE IN A SEPARATE SURGERY A R…	Lens Exchange	Resolved
https://www.accessdata.fda.gov/scripts/cdrh/cfdocs/cfMAUDE/Detail.CFM?MDRFOI__ID=16508352&pc=QCB	2023826-2023-00788	2022-12-23 05:00:00	Injury	STAAR SURGICAL COMPANY	2023-03-08 05:00:00	QCB	IMPLANTABLE COLLAMER LENS (ICL)	Misfocusing	Blurred Vision	P030016	NA	1	Event Description: THE REPORTER INDICATED THAT A 12.6MM VTICM512.6 IMPLANTABLE COLLAMER LENS OF -4.5/3/85 (SPHERE/CYLINDER/AXIS) WAS IMPLANTED INTO THE PATIENT'S LEFT EYE (OS) ON (B)(6) 2021. ON (B)(6) 2022, REFRACTIVE SURPRISE WAS OBSERVED. CAUSE OF THE EVENT IS UNKNOWN. LENS REMAINS IMPLANTED. Manufacturer Narrative: B5: LENS WAS EXPLANTED ON (B)(6) 2023 DUE TO PATIENT DISSATISFACTION/STORE AND…	Lens Extraction	Resolved
https://www.accessdata.fda.gov/scripts/cdrh/cfdocs/cfMAUDE/Detail.CFM?MDRFOI__ID=16519835&pc=QCB	2023826-2023-00813	2023-12-27 05:00:00	Injury	STAAR SURGICAL COMPANY	2023-03-10 05:00:00	QCB	IMPLANTABLE COLLAMER LENS (ICL)	Misfocusing; Inadequacy of Device Shape and/or Size	Blurred Vision	P030016	NA	1	Event Description: THE REPORTER INDICATED THAT A 13.2MM VTICMO13.2 -8.50/2.5/111 (SPHERE/CYLINDER/AXIS) IMPLANTABLE COLLAMER LENS WAS IMPLANTED INTO THE PATIENTS RIGHT EYE (OD) ON (B)(6) 2022. THE PATIENT EXPERIENCED EXCESSIVE VAULT AND REFRACTIVE SURPRISE, LENS REMAINS IMPLANTED. IF ADDITIONAL INFORMATION IS RECEIVED A SUPPLEMENTAL MEDWATCH REPORT WILL BE SUBMITTED. Manufacturer Narrative: TYPE …	Lens Exchange	Resolved
https://www.accessdata.fda.gov/scripts/cdrh/cfdocs/cfMAUDE/Detail.CFM?MDRFOI__ID=16521994&pc=QCB	2023826-2023-00789	2022-09-16 04:00:00	Malfunction	STAAR SURGICAL COMPANY	2023-03-10 05:00:00	QCB	IMPLANTABLE COLLAMER LENS (ICL)	Misfocusing; Off-Label Use; Inadequacy of Device Shape and/or Size	Blurred Vision	P030016	NA	1	Event Description: THE REPORTER INDICATED THAT A 12.1MM VTICMO12.1 IMPLANTABLE COLLAMER LENS OF -13.5/1.5/073 (SPHERE/CYLINDER/AXIS) WAS IMPLANTED INTO THE PATIENT'S LEFT EYE (OS) ON (B)(6) 2022. LOW VAULT WITHOUT ROTATION AND ON (B)(6) 2022, REFRACTIVE SUPRISE WAS OBSERVED. CAUSE OF THE EVENT IS UNKNOWN. THE LENS REMAINS IMPLANTED. THE PROBLEM IS NOT RESOLVED. Manufacturer Narrative: PATIENT INF…	Lens Retention	Not_Resolved
https://www.accessdata.fda.gov/scripts/cdrh/cfdocs/cfMAUDE/Detail.CFM?MDRFOI__ID=16538767&pc=QCB	2023826-2023-00792	2023-01-02 05:00:00	Injury	STAAR SURGICAL COMPANY	2023-03-14 04:00:00	QCB	IMPLANTABLE COLLAMER LENS (ICL)	Misfocusing; Off-Label Use	Blurred Vision	P030016	NA	1	Event Description: THE REPORTER INDICATED THAT A 12.6MM VTICMO12.6 IMPLANTABLE COLLAMER LENS OF -9.0/1.0/090 (SPHERE/CYLINDER/AXIS) WAS IMPLANTED INTO THE PATIENT'S LEFT EYE (OS) ON (B)(6) 2022. ON (B)(6)2023, THE LENS WAS EXCHANGED FOR A SAME SIZE LENS DUE TO REFRACTIVE SURPRISE. THE PROBLEM WAS RESOLVED. CAUSE OF THE EVENT IS UNKNOWN. Manufacturer Narrative: OFF-LABEL - ACD < 3.0 AGE > 45. CLAI…	Lens Exchange	Resolved
https://www.accessdata.fda.gov/scripts/cdrh/cfdocs/cfMAUDE/Detail.CFM?MDRFOI__ID=16549892&pc=QCB	2023826-2023-00905	NA	Malfunction	STAAR SURGICAL COMPANY	2023-03-15 04:00:00	QCB	IMPLANTABLE COLLAMER LENS (ICL)	Misfocusing; Device Dislodged or Dislocated	Blurred Vision	P030016	NA	1	Event Description: THE REPORTER INDICATED THAT A 12.6MM VTICMO12.6 IMPLANTABLE COLLAMER LENS OF -11.5/4.5/082 (SPHERE/CYLINDER/AXIS) WAS IMPLANTED INTO THE PATIENT'S LEFT EYE (OS) ON (B)(6) 2022. LENS ROTATION NOT ASSOCIATED TO LOW VAULT AND REFRACTIVE SURPRISE WERE OBSERVED. THE PROBLEM WAS NOT RESOLVED. CAUSE OF THE EVENT IS UNKNOWN. REPORTEDLY, "GOOD HOWEVER ICL IN @ 158 POST OPERATIVELY AND W…	Unknown	Unknown
https://www.accessdata.fda.gov/scripts/cdrh/cfdocs/cfMAUDE/Detail.CFM?MDRFOI__ID=16567677&pc=QCB	2023826-2023-00940	2023-02-07 05:00:00	Malfunction	STAAR SURGICAL COMPANY	2023-03-17 04:00:00	QCB	IMPLANTABLE COLLAMER LENS (ICL)	Misfocusing; Inadequacy of Device Shape and/or Size	Blurred Vision	P030016	NA	1	Event Description: THE REPORTER INDICATED THE SURGEON IMPLANTED A 13.2MM VTICMO13.2 IMPLANTABLE COLLAMER LENS, -16.50/+3.5/093 (SPHERE/CYLINDER/AXIS), INTO THE PATIENTS LEFT EYE (OS) ON (B)(6) 2023. THE LENS WAS REPORTED AS EXCESSIVE VAULTING AND THE PATIENT COMPLAINED OF BLURRY VISION. THE LENS REMAINED IMPLANTED. THE CAUSE OF THE EVENT WAS UNKNOWN. ADDITIONAL INFORMATION HAS BEEN REQUESTED BUT …	Lens Retention	Not_Resolved
https://www.accessdata.fda.gov/scripts/cdrh/cfdocs/cfMAUDE/Detail.CFM?MDRFOI__ID=16584143&pc=QCB	2023826-2023-00987	NA	Injury	STAAR SURGICAL COMPANY	2023-03-21 04:00:00	QCB	IMPLANTABLE COLLAMER LENS (ICL)	Misfocusing; Device Dislodged or Dislocated	Blurred Vision	P030016	NA	1	Event Description: THE REPORTER INDICATED THAT THE SURGEON IMPLANTED A 13.2MM VTICM5_13.2; -9.5/+0.5/48 (SPHERE/CYLINDER/AXIS) IMPLANTABLE COLLAMER LENS INTO THE PATIENT'S LEFT EYE (OS) ON (B)(6)2021. THE PATIENT EXPERIENCED LENS ROTATION AND REFRACTIVE SURPRISE. LENS REMAINS IMPLANTED. THE CAUSE OF THE EVENT WAS REPORTED AS UNKNOWN. Manufacturer Narrative: TYPE OF INVESTIGATION: 4110 - LENS WORK…	Lens Exchange	Resolved
https://www.accessdata.fda.gov/scripts/cdrh/cfdocs/cfMAUDE/Detail.CFM?MDRFOI__ID=16584242&pc=QCB	2023826-2023-00986	NA	Injury	STAAR SURGICAL COMPANY	2023-03-21 04:00:00	QCB	IMPLANTABLE COLLAMER LENS (ICL)	Misfocusing; Device Dislodged or Dislocated	Blurred Vision	P030016	NA	1	Event Description: THE REPORTER INDICATED THAT THE SURGEON IMPLANTED A 13.2MM VTICM5_13.2; -10.0/+0.5/68 (SPHERE/CYLINDER/AXIS) IMPLANTABLE COLLAMER LENS INTO THE PATIENT'S RIGHT EYE (OD) ON (B)(6) 2021. THE PATIENT EXPERIENCED LENS ROTATION AND REFRACTIVE SURPRISE. LENS REMAINS IMPLANTED. THE CAUSE OF THE EVENT WAS REPORTED AS UNKNOWN. Manufacturer Narrative: B5 - LENS REPLACED ON (B)(6) 2023 WI…	Lens Exchange	Resolved
https://www.accessdata.fda.gov/scripts/cdrh/cfdocs/cfMAUDE/Detail.CFM?MDRFOI__ID=16606958&pc=QCB	2023826-2023-01003	NA	Injury	STAAR SURGICAL COMPANY	2023-03-23 04:00:00	QCB	IMPLANTABLE COLLAMER LENS (ICL)	Misfocusing	Blurred Vision	P030016	NA	1	Event Description: THE REPORTER INDICATED THAT A 12.6MM VTICM512.6 IMPLANTABLE COLLAMER LENS OF -6.5/3.5/016 (SPHERE/CYLINDER/AXIS) WAS IMPLANTED INTO THE PATIENT'S EYE ON (B)(6) 2022. ON (B)(6) 2023, THE LENS WAS REMOVED DUE TO DOUBLE VISION. Manufacturer Narrative: CORRECTED DATA: D6A: SHOULD BE CORRECTED TO 07-NOV-2022. D9: RETURN DATE: 15-APR-2023 G2: SHOULD BE OMITTED FOR CORRECTION. ADDITIO…	Lens Extraction	Unknown
https://www.accessdata.fda.gov/scripts/cdrh/cfdocs/cfMAUDE/Detail.CFM?MDRFOI__ID=16610082&pc=QCB	2023826-2023-00980	2023-01-19 05:00:00	Injury	STAAR SURGICAL COMPANY	2023-03-24 04:00:00	QCB	IMPLANTABLE COLLAMER LENS (ICL)	Misfocusing; Inadequacy of Device Shape and/or Size	Blurred Vision	P030016	NA	1	Event Description: THE REPORTER INDICATED THAT A 13.7MM VTICM5_13.7 IMPLANTABLE COLLAMER LENS OF -11.0/1.0/094 (SPHERE/CYLINDER/AXIS) WAS IMPLANTED INTO THE PATIENT'S RIGHT EYE (OD) ON (B)(6) 2020. LOW VAULT AND REFRACTIVE CHANGE OVERTIME WAS OBSERVED, LENS REMAINS IMPLANTED. UNKNOWN WAS REPORTED AS CAUSE OF EVENT. IF ADDITIONAL INFORMATION IS RECEIVED A SUPPLEMENTAL MEDWATCH REPORT WILL BE SUBMI…	Lens Exchange	Resolved
https://www.accessdata.fda.gov/scripts/cdrh/cfdocs/cfMAUDE/Detail.CFM?MDRFOI__ID=16610212&pc=QCB	2023826-2023-00981	2023-01-19 05:00:00	Injury	STAAR SURGICAL COMPANY	2023-03-24 04:00:00	QCB	IMPLANTABLE COLLAMER LENS (ICL)	Misfocusing; Inadequacy of Device Shape and/or Size	Blurred Vision	P030016	NA	1	Event Description: THE REPORTER INDICATED THAT A 13.7MM VTICM5_13.7 IMPLANTABLE COLLAMER LENS OF -9.50/1.0/065 (SPHERE/CYLINDER/AXIS) WAS IMPLANTED INTO THE PATIENT'S LEFT EYE (OS) ON (B)(6)2020. LOW VAULT AND REFRACTIVE CHANGE OVERTIME WAS OBSERVED, LENS REMAINS IMPLANTED. UNKNOWN WAS REPORTED AS CAUSE OF EVENT. IF ADDITIONAL INFORMATION IS RECEIVED A SUPPLEMENTAL MEDWATCH REPORT WILL BE SUBMITT…	Lens Exchange	Resolved
https://www.accessdata.fda.gov/scripts/cdrh/cfdocs/cfMAUDE/Detail.CFM?MDRFOI__ID=16633210&pc=QCB	2023826-2023-01010	NA	Malfunction	STAAR SURGICAL COMPANY	2023-03-28 04:00:00	QCB	IMPLANTABLE COLLAMER LENS (ICL)	Misfocusing	Blurred Vision	P030016	NA	1	Event Description: THE REPORTER INDICATED THAT A 12.6MM VTICM512.6 IMPLANTABLE COLLAMER LENS OF -9.0/3.0/061 (SPHERE/CYLINDER/AXIS) WAS IMPLANTED INTO THE PATIENT'S LEFT EYE (OS) ON (B)(6) 2023. ON (B)(6) 2023, REFRACTIVE SURPRISE WAS OBSERVED. LENS REMAINS IMPLANTED. REPORTEDLY, "SO FAR PATIENT NOT COME FOR FOLLOW UP AND MORE INVESTIGATION." Manufacturer Narrative: WORK ORDER SEARCH FOUND NO SIM…	Lens Retention	Unknown
https://www.accessdata.fda.gov/scripts/cdrh/cfdocs/cfMAUDE/Detail.CFM?MDRFOI__ID=16633211&pc=QCB	2023826-2023-01009	NA	Malfunction	STAAR SURGICAL COMPANY	2023-03-28 04:00:00	QCB	IMPLANTABLE COLLAMER LENS (ICL)	Misfocusing	Blurred Vision	P030016	NA	1	Event Description: THE REPORTER INDICATED THAT A 12.6MM VTICMO12.6 IMPLANTABLE COLLAMER LENS OF -12.5/4.0/093 (SPHERE/CYLINDER/AXIS) WAS IMPLANTED INTO THE PATIENT'S RIGHT EYE (OD) ON (B)(6) 2023. ON (B)(6) 2023, REFRACTIVE SURPRISE WAS OBSERVED. LENS REMAINS IMPLANTED. REPORTEDLY, "SO FAR PATIENT NOT COME FOR FOLLOW UP AND MORE INVESTIGATION." Manufacturer Narrative: WORK ORDER SEARCH FOUND NO S…	Lens Retention	Unknown
https://www.accessdata.fda.gov/scripts/cdrh/cfdocs/cfMAUDE/Detail.CFM?MDRFOI__ID=16640306&pc=QCB	2023826-2023-01122	NA	Injury	STAAR SURGICAL COMPANY	2023-03-29 04:00:00	QCB	IMPLANTABLE COLLAMER LENS (ICL)	Misfocusing; Optical Problem	Blurred Vision	P030016	NA	1	Event Description: THE REPORTER INDICATED THAT THE SURGEON IMPLANTED A 13.2MM VTICM5_13.2; -6.0/+3.0/002 (SPHERE,CYLINDER,AXIS) IMPLANTABLE COLLAMER LENS INTO THE PATIENT'S RIGHT EYE (OD) ON (B)(6) 2022. THE SURGEON REPORTS THE PATIENT EXPERIENCED GLARE/HALOES. ON (B)(6) 2023 THE LENS WAS EXPLANTED. THIS RESOLVED THE PROBLEM. IT WAS ADDITIONALLY NOTED "PATIENT IS HAPPY". THE CAUSE OF THE EVENT WA…	Lens Extraction	Resolved
https://www.accessdata.fda.gov/scripts/cdrh/cfdocs/cfMAUDE/Detail.CFM?MDRFOI__ID=16649748&pc=QCB	2023826-2023-01078	2023-02-21 05:00:00	Injury	STAAR SURGICAL COMPANY	2023-03-30 04:00:00	QCB	IMPLANTABLE COLLAMER LENS (ICL)	Misfocusing	Blurred Vision	P030016	NA	1	Event Description: THE REPORTER INDICATED THE SURGEON IMPLANTED A 12.1MM VTICMO12.1 IMPLANTABLE COLLAMER LENS, -12.00/+1.5/013 (SPHERE/CYLINDER/AXIS), IN THE PATIENTS LEFT EYE (OS), ON (B)(6) 2023. THE LENS WAS EXPLANTED ON (B)(6) 2023 DUE TO THE PATIENT COMPLAINED OF BLURRED VISION. THE LENS WAS REPLACED WITH ANOTHER SAME MODEL/LENGTH BUT DIFFERENT DIOPTER LENS AND THE PROBLEM WAS RESOLVED. THE …	Lens Exchange	Resolved
https://www.accessdata.fda.gov/scripts/cdrh/cfdocs/cfMAUDE/Detail.CFM?MDRFOI__ID=16668634&pc=QCB	2023826-2023-01193	2023-02-14 05:00:00	Injury	STAAR SURGICAL COMPANY	2023-04-03 04:00:00	QCB	IMPLANTABLE COLLAMER LENS (ICL)	Misfocusing; Off-Label Use; Adverse Event Without Identified Device or Use Problem	Blurred Vision	P030016	NA	1	Event Description: THE REPORTER INDICATED THAT THE SURGEON IMPLANTED A TICM12.0; -13.5/+3.5/90 (SPHERE/CYLINDER/AXIS) IMPLANTABLE COLLAMER LENS INTO THE PATIENT'S LEFT EYE (OS) ON (B)(6) 2013. THE SURGEON NOTES THE PATIENT HAS REFRACTIVE CHANGE OVER TIME WHICH WAS ASSESSED ON (B)(6) 2023. LENS REMAINS IMPLANTED. THE CAUSE OF THE EVEN WAS REPORTED AS UNKNOWN. THE PROBLEM IS NOT RESOLVED. IF ADDITI…	Lens Exchange	Resolved
https://www.accessdata.fda.gov/scripts/cdrh/cfdocs/cfMAUDE/Detail.CFM?MDRFOI__ID=16670694&pc=QCB	2023826-2023-01198	NA	Malfunction	STAAR SURGICAL COMPANY	2023-04-03 04:00:00	QCB	IMPLANTABLE COLLAMER LENS (ICL)	Misfocusing	Blurred Vision	P030016	NA	1	Event Description: THE REPORTER INDICATED THAT A 13.2MM VTICM5_13.2 -7.00/1.0/012 (SPHERE/CYLINDER/AXIS) IMPLANTABLE COLLAMER LENS WAS IMPLANTED INTO THE PATIENTS EYE. A PLANNED LENS REMOVAL IS REPORTED DUE TO POSTOPERATIVE REFRACTION (INTENDED PLANO), LENS REMAINS IMPLANTED. ATTEMPTS TO OBTAIN ADDITIONAL INFORMATION HAVE NOT BEEN SUCCESSFUL. IF ADDITIONAL INFORMATION IS RECEIVED A SUPPLEMENTAL M…	Lens Retention	Unknown
https://www.accessdata.fda.gov/scripts/cdrh/cfdocs/cfMAUDE/Detail.CFM?MDRFOI__ID=16678777&pc=QCB	2023826-2023-01181	2023-03-02 05:00:00	Injury	STAAR SURGICAL COMPANY	2023-04-04 04:00:00	QCB	IMPLANTABLE COLLAMER LENS (ICL)	Misfocusing	Blurred Vision	P030016	NA	1	Event Description: THE REPORTER INDICATED THAT A 13.2MM VTICM513.2 IMPLANTABLE COLLAMER LENS OF -8.5/1.5/099 (SPHERE/CYLINDER/AXIS) WAS IMPLANTED IN THE PATIENT'S LEFT EYE (OS) ON (B)(6) 2022. REFRACTIVE CHANGE WAS OBSERVED. CAUSE OF THE EVENT IS UNKNOWN. Manufacturer Narrative: PATIENT INFORMATION:UNK. WORK ORDER SEARCH FOUND NO SIMILAR COMPLAINTS. CLAIM# (B)(4). Manufacturer Narrative: ADDITION…	Lens Retention	Not_Resolved
https://www.accessdata.fda.gov/scripts/cdrh/cfdocs/cfMAUDE/Detail.CFM?MDRFOI__ID=16678779&pc=QCB	2023826-2023-01184	2023-02-13 05:00:00	Injury	STAAR SURGICAL COMPANY	2023-04-04 04:00:00	QCB	IMPLANTABLE COLLAMER LENS (ICL)	Misfocusing	Blurred Vision	P030016	NA	1	Event Description: THE REPORTER INDICATED THAT A 12.6MM VTICM512.6 IMPLANTABLE COLLAMER LENS OF A -6.0/1.0/76 (SPHERE/CYLINDER/AXIS) WAS IMPLANTED INTO THE PATIENT'S LEFT EYE (OS) ON 08-FEB-2023. ON 17-FEB-2023, THE LENS WAS REMOVED DUE TO REFRACTIVE SURPRISE. THE PROBLEM WAS RESOLVED. Manufacturer Narrative: PATIENT INFORMATION:UNK. WORK ORDER SEARCH FOUND NO SIMILAR COMPLAINTS. CLAIM# (B)(4). M…	Lens Extraction	Resolved
https://www.accessdata.fda.gov/scripts/cdrh/cfdocs/cfMAUDE/Detail.CFM?MDRFOI__ID=16678780&pc=QCB	2023826-2023-01180	2023-03-02 05:00:00	Injury	STAAR SURGICAL COMPANY	2023-04-04 04:00:00	QCB	IMPLANTABLE COLLAMER LENS (ICL)	Misfocusing	Blurred Vision	P030016	NA	1	Event Description: THE REPORTER INDICATED THAT A 13.2MM VTICM513.2 IMPLANTABLE COLLAMER LENS OF -8.5/1.0/098 (SPHERE/CYLINDER/AXIS) WAS IMPLANTED IN THE PATIENT'S RIGHT EYE (OD) ON (B)(6) 2022. REFRACTIVE CHANGE WAS OBSERVED. CAUSE OF THE EVENT IS UNKNOWN. Manufacturer Narrative: CORRECTED DATA: B5- THE REPORTER INDICATED THAT THE SURGEON IMPLANTED A 13.2MM VTICM5_13.2 IMPLANTABLE COLLAMER LENS O…	Lens Retention	Not_Resolved
https://www.accessdata.fda.gov/scripts/cdrh/cfdocs/cfMAUDE/Detail.CFM?MDRFOI__ID=16678782&pc=QCB	2023826-2023-01182	2022-09-30 04:00:00	Injury	STAAR SURGICAL COMPANY	2023-04-04 04:00:00	QCB	IMPLANTABLE COLLAMER LENS (ICL)	Misfocusing; Device Dislodged or Dislocated	Blurred Vision	P030016	NA	1	Event Description: THE REPORTER INDICATED THAT A 12.6MM VTICMO12.6 IMPLANTABLE COLLAMER LENS OF -9.5/2.0/088 (SPHERE/CYLINDER/AXIS) WAS IMPLANTED INTO THE PATIENT'S RIGHT EYE (OD) ON (B)(6) 2022. ON (B)(6) 2022 THE LENS WAS REPOSITIONED DUE TO LENS ROTATION, WHICH DID NOT RESOLVED THE PROBLEM. ON (B)(6) 2022, THE LENS WAS REPLACED FOR A SAME SIZE LENS DUE TO LENS ROTATION NOT ASSOCIATED TO LOW VA…	Lens Exchange	Not_Resolved
https://www.accessdata.fda.gov/scripts/cdrh/cfdocs/cfMAUDE/Detail.CFM?MDRFOI__ID=16678785&pc=QCB	2023826-2023-01177	NA	Injury	STAAR SURGICAL COMPANY	2023-04-04 04:00:00	QCB	IMPLANTABLE COLLAMER LENS (ICL)	Misfocusing	Blurred Vision	P030016	NA	1	Event Description: THE REPORTER INDICATED THAT A 13.2MM VTICM513.2 IMPLANTABLE COLLAMER LENS OF -10.50/0.5/140 (SPHERE,CYLINDER,AXIS) WAS IMPLANTED INTO THE PATIENT'S LEFT EYE (OS) ON (B)(6) 2022. ON (B)(6) 2022, THE LENS WAS EXCHANGED FOR A SPHERIC MODEL LENS DUE TO REFRACTIVE SURPRISE. THE PROBLEM WAS RESOLVED. Manufacturer Narrative: (B)(4).	Lens Exchange	Resolved
https://www.accessdata.fda.gov/scripts/cdrh/cfdocs/cfMAUDE/Detail.CFM?MDRFOI__ID=16678786&pc=QCB	2023826-2023-01183	2022-09-30 04:00:00	Malfunction	STAAR SURGICAL COMPANY	2023-04-04 04:00:00	QCB	IMPLANTABLE COLLAMER LENS (ICL)	Misfocusing	Blurred Vision	P030016	NA	1	Event Description: THE REPORTER INDICATED THAT A 12.6MM VTICMO12.6 IMPLANTABLE COLLAMER LENS OF -9.5/2.0/098 (SPHERE/CYLINDER/AXIS) WAS IMPLANTED AS A REPLACEMENT INTO THE PATIENT'S RIGHT EYE (OD) ON (B)(6) 2022. THE EXCHANGE WAS DUE TO LENS ROTATION NOT ASSOCIATED TO LOW VAULT AND REFRACTIVE SURPRISE. THE PROBLEM WAS NOT RESOLVED. CAUSE OF THE EVENT IS UNKNOWN. REPORTEDLY, "AFTER IMPLANTATION OF…	Lens Exchange	Not_Resolved
https://www.accessdata.fda.gov/scripts/cdrh/cfdocs/cfMAUDE/Detail.CFM?MDRFOI__ID=16728332&pc=QCB	2023826-2023-01362	2021-07-28 04:00:00	Injury	STAAR SURGICAL COMPANY	2023-04-12 04:00:00	QCB	IMPLANTABLE COLLAMER LENS (ICL)	Misfocusing; Device Dislodged or Dislocated	Blurred Vision	P030016	NA	1	Event Description: THE REPORTER INDICATED THAT THE SURGEON IMPLANTED A 12.6MM VTICMO12.6; -9.5/2.5/92 (SPHERE/CYLINDER/AXIS) IMPLANTABLE COLLAMER LENS INTO THE PATIENT'S RIGHT EYE (OD) ON (B)(6)2021. THE SURGEON REPORTS LENS ROTATION; REFRACTIVE SURPRISE. ON (B)(6) 2021 THE LENS WAS REPOSITIONED BUT THIS DID NOT RESOLVE THE PROBLEM. THEN ON (B)(6) 2022 THE LENS WAS EXCHANGED WITH A LONGER LENGTH …	Lens Exchange	Resolved
https://www.accessdata.fda.gov/scripts/cdrh/cfdocs/cfMAUDE/Detail.CFM?MDRFOI__ID=16773435&pc=QCB	2023826-2023-01464	2022-03-21 04:00:00	Injury	STAAR SURGICAL COMPANY	2023-04-19 04:00:00	QCB	IMPLANTABLE COLLAMER LENS (ICL)	Misfocusing	Blurred Vision	P030016	NA	1	Event Description: THE REPORTER INDICATED THAT THE SURGEON IMPLANTED A 13.7MM VTICM5_13.7; -10.5/+0.50/78 (SPHERE/CYLINDER/AXIS) IMPLANTABLE COLLAMER LENS INTO THE PATIENT'S LEFT EYE (OS) ON (B)(6)2023. THE PATIENT EXPERIENCED REFRACTIVE SURPRISE. LENS REMAINS IMPLANTED. THE CAUSE OF THE EVENT WAS REPORTED AS UNKNOWN. Manufacturer Narrative: ADDITIONAL INFORMATION: B5: LENS EXCHANGED ON (B)(6) 20…	Lens Exchange	Resolved
https://www.accessdata.fda.gov/scripts/cdrh/cfdocs/cfMAUDE/Detail.CFM?MDRFOI__ID=16791810&pc=QCB	2023826-2023-01446	2023-03-16 04:00:00	Malfunction	STAAR SURGICAL COMPANY	2023-04-21 04:00:00	QCB	IMPLANTABLE COLLAMER LENS (ICL)	Misfocusing	Blurred Vision	P030016	NA	1	Event Description: THE REPORTER INDICATED THAT A 12.1MM VTICM5_12.1 IMPLANTABLE COLLAMER LENS OF -6.00/1.5/159 (SPHERE/CYLINDER/AXIS) WAS IMPLANTED INTO THE PATIENT'S RIGHT EYE (OD) ON (B)(6) 2023. THE PATIENT EXPERIENCED REFRACTIVE SURPRISE, LENS REMAINS IMPLANTED. THE CAUSE OF EVENT WAS UNKNOWN. IF ADDITIONAL INFORMATION IS RECEIVED A SUPPLEMENTAL MEDWATCH REPORT WILL BE SUBMITTED. Manufacturer…	Lens Retention	Resolved
https://www.accessdata.fda.gov/scripts/cdrh/cfdocs/cfMAUDE/Detail.CFM?MDRFOI__ID=16791940&pc=QCB	2023826-2023-01447	2023-03-16 04:00:00	Injury	STAAR SURGICAL COMPANY	2023-04-21 04:00:00	QCB	IMPLANTABLE COLLAMER LENS (ICL)	Misfocusing	Blurred Vision	P030016	NA	1	Event Description: THE REPORTER INDICATED THAT A 12.1MM VTICM5_12.1 IMPLANTABLE COLLAMER LENS OF -4.00/1.0/29 (SPHERE/CYLINDER/AXIS) WAS IMPLANTED INTO THE PATIENT'S LEFT EYE (OS) ON (B)(6) 2023. THE PATIENT EXPERIENCED REFRACTIVE SURPRISE, LENS REMAINS IMPLANTED. THE CAUSE OF EVENT WAS UNKNOWN. IF ADDITIONAL INFORMATION IS RECEIVED A SUPPLEMENTAL MEDWATCH REPORT WILL BE SUBMITTED. Manufacturer N…	Lens Extraction	Unknown
https://www.accessdata.fda.gov/scripts/cdrh/cfdocs/cfMAUDE/Detail.CFM?MDRFOI__ID=16792761&pc=QCB	2023826-2023-01428	2022-04-27 04:00:00	Injury	STAAR SURGICAL COMPANY	2023-04-22 04:00:00	QCB	IMPLANTABLE COLLAMER LENS (ICL)	Misfocusing	Blurred Vision	P030016	NA	1	Event Description: THE REPORTER INDICATED THAT A 12.1MM VTICMO12.1 IMPLANTABLE COLLAMER LENS OF -9.5/2.5/075 (SPHERE/CYLINDER/AXIS) WAS IMPLANTED INTO THE PATIENT'S LEFT EYE (OS) ON (B)(6) 2022. ON (B)(6)2023, THE LENS WAS EXCHANGED DUE TO REFRACTIVE SURPRISE. THE PROBLEM WAS RESOLVED. CAUSE OF THE EVENT IS UNKNOWN. Manufacturer Narrative: UNK WORK ORDER SEARCH: NO SIMILAR COMPLAINTS WITHIN ASSOC…	Lens Exchange	Resolved
https://www.accessdata.fda.gov/scripts/cdrh/cfdocs/cfMAUDE/Detail.CFM?MDRFOI__ID=16811280&pc=QCB	2023826-2023-01517	2022-12-27 05:00:00	Injury	STAAR SURGICAL COMPANY	2023-04-25 04:00:00	QCB	IMPLANTABLE COLLAMER LENS (ICL)	Misfocusing	Blurred Vision	P030016	NA	1	Event Description: THE REPORTER INDICATED THAT A 12.1MM VTICMO12.1 IMPLANTABLE COLLAMER LENS OF -2.5/1.0/087 (SPHERE/CYLINDER/AXIS) WAS IMPLANTED INTO THE PATIENT'S LEFT EYE (OS) ON (B)(6) 2022. ON (B)(6) 2023 THE LENS WAS EXCHANGED FOR A DIFFERENT POWER LENS DUE TO REFRACTIVE SURPRISE. THE EXCHANGE RESOLVED THE PROBLEM. CAUSE OF EVENT WAS UNKNOWN. Manufacturer Narrative: H3: DEVICE EVALUATION: L…	Lens Exchange	Resolved
https://www.accessdata.fda.gov/scripts/cdrh/cfdocs/cfMAUDE/Detail.CFM?MDRFOI__ID=16811756&pc=QCB	2023826-2023-01558	2023-02-01 05:00:00	Injury	STAAR SURGICAL COMPANY	2023-04-25 04:00:00	QCB	IMPLANTABLE COLLAMER LENS (ICL)	Misfocusing; Adverse Event Without Identified Device or Use Problem	Blurred Vision	P030016	NA	1	Event Description: THE REPORTER INDICATED THAT THE SURGEON IMPLANTED A 13.2MM VTICMO13.2; -11.00/+4.0/95 (SPHERE/CYLINDER/AXIS) IMPLANTABLE COLLAMER LENS INTO THE PATIENT'S RIGHT EYE (OD) ON (B)(6) 2022. THE PATIENT EXPERIENCED REFRACTIVE SURPRISE. LENS REMAINS IMPLANTED. ATTEMPTS TO OBTAIN ADDITIONAL INFORMATION HAVE NOT BEEN SUCCESSFUL. IF ADDITIONAL INFORMATION IS RECEIVED A SUPPLEMENTAL MEDWA…	Lens Exchange	Resolved
https://www.accessdata.fda.gov/scripts/cdrh/cfdocs/cfMAUDE/Detail.CFM?MDRFOI__ID=16828371&pc=QCB	2023826-2023-01531	2022-11-28 05:00:00	Injury	STAAR SURGICAL COMPANY	2023-04-27 04:00:00	QCB	IMPLANTABLE COLLAMER LENS (ICL)	Misfocusing	Blurred Vision	P030016	NA	1	Event Description: THE REPORTER INDICATED THAT A 13.2MM VTICMO13.2 IMPLANTABLE COLLAMER LENS OF -7.5/1.5/167 (SPHERE/CYLINDER/AXIS) WAS IMPLANTED INTO THE PATIENT'S RIGHT EYE (OD) ON (B)(6) 2022. ON (B)(6) 2022 THE LENS WAS EXCHANGED FOR A DIFFERENT POWER LENS DUE TO REFRACTIVE SURPRISE. THE EXCHANGE RESOLVED THE PROBLEM. CAUSE OF EVENT WAS UNKNOWN. Manufacturer Narrative: H6 - TYPE OF INVESTIGAT…	Lens Exchange	Resolved
https://www.accessdata.fda.gov/scripts/cdrh/cfdocs/cfMAUDE/Detail.CFM?MDRFOI__ID=16839441&pc=QCB	2023826-2023-01568	2023-03-01 05:00:00	Injury	STAAR SURGICAL COMPANY	2023-04-28 04:00:00	QCB	IMPLANTABLE COLLAMER LENS (ICL)	Misfocusing; Device Dislodged or Dislocated	Blurred Vision	P030016	NA	1	Event Description: THE REPORTER INDICATED THAT THE SURGEON IMPLANTED A 12.6MM VTICMO12.6; -15.50/+3.0/068 (SPHERE/CYLINDER/AXIS) IMPLANTABLE COLLAMER LENS INTO THE PATIENT'S RIGHT EYE (OD) ON (B)(6) 2023. THE PATIENT EXPERIENCED LENS ROTATION NOT ASSOCIATED WITH LOW VAULTING; BLURRY VISION. ON (B)(6) 2023 THE LENS WAS EXCHANGED WITH A LONGER LENGTH LENS AND THIS RESOLVED THE PROBLEM. THE CAUSE OF…	Lens Exchange	Resolved
https://www.accessdata.fda.gov/scripts/cdrh/cfdocs/cfMAUDE/Detail.CFM?MDRFOI__ID=16839442&pc=QCB	2023826-2023-01569	2023-03-01 05:00:00	Injury	STAAR SURGICAL COMPANY	2023-04-28 04:00:00	QCB	IMPLANTABLE COLLAMER LENS (ICL)	Misfocusing; Device Dislodged or Dislocated	Blurred Vision	P030016	NA	1	Event Description: THE REPORTER INDICATED THAT THE SURGEON IMPLANTED A 12.6MM VTICM5_12.6; -13.00/+4.0/113 (SPHERE/CYLINDER/AXIS) IMPLANTABLE COLLAMER LENS INTO THE PATIENT'S LEFT EYE (OS) ON (B)(6) 2023. THE PATIENT EXPERIENCED LENS ROTATION NOT ASSOCIATED WITH LOW VAULTING; BLURRY VISION. IT WAS NOTED THAT AFTER IMPLANT; THE PATIENT WENT TO THE EXAM ROOM TO BE EVALUATED AND THE SURGEON NOTICED …	Lens Exchange	Resolved
https://www.accessdata.fda.gov/scripts/cdrh/cfdocs/cfMAUDE/Detail.CFM?MDRFOI__ID=16850168&pc=QCB	2023826-2023-01598	2023-04-10 04:00:00	Injury	STAAR SURGICAL COMPANY	2023-05-01 04:00:00	QCB	IMPLANTABLE COLLAMER LENS (ICL)	Misfocusing	Blurred Vision	P030016	NA	1	Event Description: THE REPORTER INDICATED THAT THE SURGEON IMPLANTED A 12.6MM VTICMO12.6; -16.5/1.5/091 (SPHERE/CYLINDER/AXIS) IMPLANTABLE COLLAMER LENS INTO THE PATIENT'S LEFT EYE (OS) ON (B)(6) 2023. THE LENS HAD TORE DURING INJECTION/DELIVERY INTO THE EYE. ON THIS SAME DATE IN A SEPARATE SURGERY THE LENS WAS EXPLANTED WITH NO PATIENT INJURY. IT WAS ADDITIONALLY NOTED "AFTER SURGERY THE PATIENT…	Lens Extraction	Not_Resolved
https://www.accessdata.fda.gov/scripts/cdrh/cfdocs/cfMAUDE/Detail.CFM?MDRFOI__ID=16864790&pc=QCB	2023826-2023-01663	2023-03-06 05:00:00	Malfunction	STAAR SURGICAL COMPANY	2023-05-03 04:00:00	QCB	IMPLANTABLE COLLAMER LENS (ICL)	Misfocusing	Blurred Vision	P030016	NA	1	Event Description: THE REPORTER INDICATED THAT THE SURGEON IMPLANTED A 13.7MM VTICM5_13.7; -14.00/4.0/098 (SPHERE/CYLINDER/AXIS) IMPLANTABLE COLLAMER LENS INTO THE PATIENT'S RIGHT EYE (OD) ON (B)(6) 2023. THE SURGEON REPORTS THERE IS REFRACTIVE SURPRISE AND BLURRY VISION. LENS REMAINS IMPLANTED. THE PROBLEM IS NOT RESOLVED. THE CAUSE OF THE EVENT WAS REPORTED AS UNKNOWN. ATTEMPTS TO OBTAIN ADDITI…	Lens Retention	Not_Resolved
https://www.accessdata.fda.gov/scripts/cdrh/cfdocs/cfMAUDE/Detail.CFM?MDRFOI__ID=16888245&pc=QCB	2023826-2023-01638	2023-04-07 04:00:00	Malfunction	STAAR SURGICAL COMPANY	2023-05-08 04:00:00	QCB	IMPLANTABLE COLLAMER LENS (ICL)	Misfocusing	Blurred Vision	P030016	NA	1	Event Description: THE REPORTER INDICATED THAT A 12.1MM VTICMO12.1 IMPLANTABLE COLLAMER LENS OF A -15.0/3.0/90 (SPHERE/CYLINDER/AXIS) WAS IMPLANTED AS A REPLACEMENT INTO THE PATIENT'S LEFT EYE (OD) ON (B)(6) 2023, DUE TO THE INITIAL LENS TEAR/BREAK DURING INJECTION/DELIVERY INTO THE EYE. BLURRED VISON AND MILD CORNEAL EDEMA WAS OBERSRVED. THE STATUS OF THE EYE REPORTED, "MILD CORNEA EDEMA." Manuf…	Unknown	Unknown
https://www.accessdata.fda.gov/scripts/cdrh/cfdocs/cfMAUDE/Detail.CFM?MDRFOI__ID=16890526&pc=QCB	2023826-2023-01746	2023-04-01 04:00:00	Malfunction	STAAR SURGICAL COMPANY	2023-05-08 04:00:00	QCB	IMPLANTABLE COLLAMER LENS (ICL)	Device Dislodged or Dislocated	Blurred Vision	P030016	NA	1	Event Description: THE REPORTER INDICATED THAT A 13.2MM, VTICM013.2, -15.50/1.5/069 (SPHERE/CYLINDER/AXIS) IMPLANTABLE COLLAMER LENS WAS IMPLANTED INTO THE PATIENT'S LEFT EYE (OS) ON (B)(6) 2023 AS A REPLACEMENT LENS TO CORRECT LENS ROTATION NOT ASSOCIATED TO A LOW VAULT. THIS REPLACEMENT LENS DID NOT RESOLVE THE PROBLEM, " LENS HAS ROTATED/ INDUCED ASTIGMATISM" WAS REPORTED. LENS REMAINS IMPLANT…	Lens Retention	Unknown
https://www.accessdata.fda.gov/scripts/cdrh/cfdocs/cfMAUDE/Detail.CFM?MDRFOI__ID=16892246&pc=QCB	2023826-2023-01747	2023-03-07 05:00:00	Injury	STAAR SURGICAL COMPANY	2023-05-08 04:00:00	QCB	IMPLANTABLE COLLAMER LENS (ICL)	Misfocusing	Blurred Vision	P030016	NA	1	Event Description: THE REPORTER INDICATED THAT A 12.6MM VTICMO12.6 IMPLANTABLE COLLAMER LENS OF -4.5/1.0/068 (SPHERE/CYLINDER/AXIS) WAS IMPLANTED INTO THE PATIENT'S LEFT EYE (OS) ON (B)(6) 2022. ON (B)(6) 2023 THE LENS WAS EXCHANGED FOR A DIFFERENT POWER LENS DUE TO REFRACTIVE SURPRISE. THE EXCHANGE RESOLVED THE PROBLEM. CAUSE OF EVENT WAS UNKNOWN. Manufacturer Narrative: H6 - TYPE OF INVESTIGATI…	Lens Exchange	Resolved
https://www.accessdata.fda.gov/scripts/cdrh/cfdocs/cfMAUDE/Detail.CFM?MDRFOI__ID=16894692&pc=QCB	2023826-2023-01556	NA	Injury	STAAR SURGICAL COMPANY	2023-05-09 04:00:00	QCB	IMPLANTABLE COLLAMER LENS (ICL)	Misfocusing	Blurred Vision	P030016	NA	1	Event Description: THE REPORTER INDICATED THAT REFRACTIVE SURPRISE WAS OBSERVED. ADDITIONAL INFORMATION HAS BEEN REQUESTED BUT NONE HAS BEEN FORTHCOMING. Manufacturer Narrative: B5 - THE REPORTER INDICATED THAT A 12.6MM VTICM12.6 -3.0/2.0/083 (SPHERE/CYLINDER/AXIS) WAS IMPLANTED ON (B)(6) 2023 INTO THE PATIENT'S RIGHT EYE (OD). LENS ROTATION NOT ASSOCIATED TO LOW VAULT WAS OBSERVED. LENS WAS REPO…	Lens Repositioning	Resolved
https://www.accessdata.fda.gov/scripts/cdrh/cfdocs/cfMAUDE/Detail.CFM?MDRFOI__ID=16894694&pc=QCB	2023826-2023-01555	2023-04-04 04:00:00	Injury	STAAR SURGICAL COMPANY	2023-05-09 04:00:00	QCB	IMPLANTABLE COLLAMER LENS (ICL)	Misfocusing	Blurred Vision	P030016	NA	1	Event Description: THE REPORTER INDICATED THAT THE SURGEON IMPLANTED A 13.2MM VTICM5_13.2, -8.0/1.5/159 (SPHERE/CYLINDER/AXIS), IMPLANTABLE COLLAMER LENS INTO THE PATIENT'S LEFT EYE (OS) IN (B)(6) 2022. REFRACTIVE SURPRISE WAS OBSERVED. LENS REMAINS IMPLANTED. CAUSE OF THE EVENT IS REPORTED AS UNKNOWN. ADDITIONAL INFORMATION HAS BEEN REQUESTED BUT NONE HAS BEEN FORTHCOMING. Manufacturer Narrative…	Lens Exchange	Resolved
https://www.accessdata.fda.gov/scripts/cdrh/cfdocs/cfMAUDE/Detail.CFM?MDRFOI__ID=16894700&pc=QCB	2023826-2023-01554	2023-04-04 04:00:00	Injury	STAAR SURGICAL COMPANY	2023-05-09 04:00:00	QCB	IMPLANTABLE COLLAMER LENS (ICL)	Misfocusing	Blurred Vision	P030016	NA	1	Event Description: THE REPORTER INDICATED THAT THE SURGEON IMPLANTED A 13.2MM VTICM5_13.2, -8.0/1.5/041 (SPHERE/CYLINDER/AXIS), IMPLANTABLE COLLAMER LENS INTO THE PATIENT'S RIGHT EYE (OD) IN (B)(6) 2022. REFRACTIVE SURPRISE WAS OBSERVED. LENS REMAINS IMPLANTED. CAUSE OF THE EVENT IS REPORTED AS UNKNOWN. ADDITIONAL INFORMATION HAS BEEN REQUESTED BUT NONE HAS BEEN FORTHCOMING. Manufacturer Narrativ…	Lens Exchange	Resolved
https://www.accessdata.fda.gov/scripts/cdrh/cfdocs/cfMAUDE/Detail.CFM?MDRFOI__ID=16897246&pc=QCB	2023826-2023-01750	2022-11-17 05:00:00	Injury	STAAR SURGICAL COMPANY	2023-05-09 04:00:00	QCB	IMPLANTABLE COLLAMER LENS (ICL)	Misfocusing; Off-Label Use; Inadequacy of Device Shape and/or Size	Blurred Vision	P030016	NA	1	Event Description: THE REPORTER INDICATED THAT A 12.1MM VTICMO12.1 -9.5/1.0/019 (SPHERE/CYLINDER/AXIS) IMPLANTABLE COLLAMER LENS WAS IMPLANTED INTO THE PATIENT'S LEFT EYE (OS) ON (B)(6) 2018. ON (B)(6) 2023 THE LENS WAS EXCHANGED FOR A LONGER LENGTH AND DIFFERENT POWER LENS DUE TO LOW VAULT AND REFRACTIVE SURPRISE. THIS EXCHANGE RESOLVED THE PROBLEM. CAUSE OF EVENT WAS REPORTED AS UNKNOWN. Manufa…	Lens Exchange	Resolved
https://www.accessdata.fda.gov/scripts/cdrh/cfdocs/cfMAUDE/Detail.CFM?MDRFOI__ID=16908166&pc=QCB	2023826-2023-01776	2023-03-17 04:00:00	Injury	STAAR SURGICAL COMPANY	2023-05-10 04:00:00	QCB	IMPLANTABLE COLLAMER LENS (ICL)	Misfocusing; Inadequacy of Device Shape and/or Size	Blurred Vision	P030016	NA	1	Event Description: THE REPORTER INDICATED THE SURGEON IMPLANTED A 13.2MM VTICMO13.2 IMPLANTABLE COLLAMER LENS, -17.50/+1.0/048 (SPHERE/CYLINDER/AXIS), INTO THE PATIENTS LEFT EYE (OS) ON (B)(6) 2023. THE LENS WAS REPORTED AS LOW VAULTING AND THE PATIENT EXPERIENCED BLURRED VISION AND A REFRACTIVE SURPRISE. THE LENS VAULT WAS LOW AND SAT TOO HIGH IN THE SULCUS CAUSING A "SMUDGE" IN VISION. THE LENS…	Lens Exchange	Resolved
https://www.accessdata.fda.gov/scripts/cdrh/cfdocs/cfMAUDE/Detail.CFM?MDRFOI__ID=16920640&pc=QCB	2023826-2023-01802	2023-03-27 04:00:00	Malfunction	STAAR SURGICAL COMPANY	2023-05-12 04:00:00	QCB	IMPLANTABLE COLLAMER LENS (ICL)	Misfocusing	Blurred Vision	P030016	NA	1	Event Description: THE REPORTER INDICATED THAT A 13.2MM VTICM5_13.2 IMPLANTABLE COLLAMER LENS OF -9.50/0.5/106 (SPHERE/CYLINDER/AXIS) WAS IMPLANTED INTO THE PATIENT'S RIGHT EYE (OD) ON (B)(6) 2023. THE PATIENT EXPERIENCED REFRACTIVE SURPRISE, LENS REMAINS IMPLANTED. CAUSE OF EVENT WAS UNKNOWN. ADDITIONAL INFORMATION HAS BEEN REQUESTED BUT NONE HAS BEEN FORTHCOMING. IF ADDITIONAL INFORMATION IS RE…	Lens Retention	Unknown
https://www.accessdata.fda.gov/scripts/cdrh/cfdocs/cfMAUDE/Detail.CFM?MDRFOI__ID=16920684&pc=QCB	2023826-2023-01801	2023-03-27 04:00:00	Malfunction	STAAR SURGICAL COMPANY	2023-05-12 04:00:00	QCB	IMPLANTABLE COLLAMER LENS (ICL)	Misfocusing	Blurred Vision	P030016	NA	1	Event Description: THE REPORTER INDICATED THAT A 13.2MM VTICM5_13.2 IMPLANTABLE COLLAMER LENS OF -7.50/0.5/090 (SPHERE/CYLINDER/AXIS) WAS IMPLANTED INTO THE PATIENT'S LEFT EYE (OS) ON (B)(6) 2023. THE PATIENT EXPERIENCED REFRACTIVE SURPRISE, LENS REMAINS IMPLANTED. CAUSE OF EVENT WAS UNKNOWN. ADDITIONAL INFORMATION HAS BEEN REQUESTED BUT NONE HAS BEEN FORTHCOMING. IF ADDITIONAL INFORMATION IS REC…	Lens Retention	Unknown
https://www.accessdata.fda.gov/scripts/cdrh/cfdocs/cfMAUDE/Detail.CFM?MDRFOI__ID=16922176&pc=QCB	2023826-2023-01781	2023-04-21 04:00:00	Malfunction	STAAR SURGICAL COMPANY	2023-05-12 04:00:00	QCB	IMPLANTABLE COLLAMER LENS (ICL)	Misfocusing	Blurred Vision	P030016	NA	1	Event Description: THE REPORTER INDICATED THE SURGEON IMPLANTED A 13.2MM VTICMO13.2 IMPLANTABLE COLLAMER LENS, -17.50/+4.0/088 (SPHERE/CYLINDER/AXIS), INTO THE PATIENTS LEFT EYE (OS) ON (B)(6) 2023. THE LENS HAD A 1 + CELL AND THE PATIENT COMPLAINED OF BLURRED VISION. THE LENS REMAINED IMPLANTED. THIS WAS THE REPLACEMENT LENS FOR MFR. REPORT # 2023826-2023-01687. Manufacturer Narrative: B5: THE P…	Lens Retention	Unknown
https://www.accessdata.fda.gov/scripts/cdrh/cfdocs/cfMAUDE/Detail.CFM?MDRFOI__ID=16934647&pc=QCB	2023826-2023-01876	2023-02-16 05:00:00	Injury	STAAR SURGICAL COMPANY	2023-05-15 04:00:00	QCB	IMPLANTABLE COLLAMER LENS (ICL)	Misfocusing	Blurred Vision	P030016	NA	1	Event Description: THE REPORTER INDICATED THAT THE SURGEON IMPLANTED A 13.2MM VTICM5_13.2; -8.50/+1.0/142 (SPHERE/CYLINDER/AXIS) IMPLANTABLE COLLAMER LENS INTO THE PATIENT'S RIGHT EYE (OD) ON (B)(6)2022. THE PATIENT EXPERIENCED REFRACTIVE SURPRISE. LENS REMAINS IMPLANTED. IF ADDITIONAL INFORMATION IS RECEIVED A SUPPLEMENTAL MEDWATCH REPORT WILL BE SUBMITTED. Manufacturer Narrative: H6 - TYPE OF I…	Lens Exchange	Resolved
https://www.accessdata.fda.gov/scripts/cdrh/cfdocs/cfMAUDE/Detail.CFM?MDRFOI__ID=16962318&pc=QCB	2023826-2023-01924	2023-04-18 04:00:00	Injury	STAAR SURGICAL COMPANY	2023-05-19 04:00:00	QCB	IMPLANTABLE COLLAMER LENS (ICL)	Misfocusing; Inadequacy of Device Shape and/or Size	Blurred Vision	P030016	NA	1	Event Description: THE REPORTER INDICATED THAT A 13.2MM VTICMO13.2 -5.5/1.0/075 (SPHERE/CYLINDER/AXIS) IMPLANTABLE COLLAMER LENS WAS IMPLANTED INTO THE PATIENT'S LEFT EYE (OS) ON (B)(6) 2023. ON (B)(6) 2023 THE LENS WAS EXCHANGED FOR A SHORTER LENGTH AND DIFFERENT POWER LENS DUE TO EXCESSIVE VAULT AND REFRACTIVE SURPRISE. THE EXCHANGE RESOLVED THE PROBLEM. CAUSE OF EVENT REPORTED AS UNKNOWN. Manu…	Lens Exchange	Resolved
https://www.accessdata.fda.gov/scripts/cdrh/cfdocs/cfMAUDE/Detail.CFM?MDRFOI__ID=16991212&pc=QCB	2023826-2023-01771	NA	Injury	STAAR SURGICAL COMPANY	2023-05-24 04:00:00	QCB	IMPLANTABLE COLLAMER LENS (ICL)	Misfocusing; Adverse Event Without Identified Device or Use Problem	Blurred Vision	P030016	NA	1	Event Description: THE REPORTER INDICATED THAT A 13.2MM, VTICMO 13.2, -14.5/2.5/055 (SPHERE/CYLINDER/AXIS), IMPLANTABLE COLLAMER LENS WAS IMPLANTED INTO THE PATIENT'S LEFT EYE (OS) ON (B)(6) 2022. REFRACTIVE SURPRISE WAS OBSERVED, THE LENS REMAINS IMPLANTED. ADDITIONAL INFORMATION HAS BEEN REQUESTED BUT NONE HAS BEEN FORTHCOMING. Manufacturer Narrative: CLAIM# (B)(4). Manufacturer Narrative: ADDI…	Lens Exchange	Resolved
https://www.accessdata.fda.gov/scripts/cdrh/cfdocs/cfMAUDE/Detail.CFM?MDRFOI__ID=16994612&pc=QCB	2023826-2023-01993	2020-04-24 04:00:00	Injury	STAAR SURGICAL COMPANY	2023-05-24 04:00:00	QCB	IMPLANTABLE COLLAMER LENS (ICL)	Misfocusing	Blurred Vision	P030016	NA	1	Event Description: THE REPORTER INDICATED THAT A 12.6MM VTICMO12.6 IMPLANTABLE COLLAMER LENS OF -8.0/2.0/096 (SPHERE/CYLINDER/AXIS) WAS IMPLANTED INTO THE PATIENT'S LEFT EYE (OS) ON (B)(6)2020. ON (B)(6)2021 THE LENS WAS EXCHANGED FOR A DIFFERENT POWER LENS DUE TO REFRACTIVE SURPRISE. THE EXCHANGE RESOLVED THE PROBLEM. CAUSE OF EVENT WAS UNKNOWN. Manufacturer Narrative: H6 - TYPE OF INVESTIGATION…	Lens Exchange	Resolved
https://www.accessdata.fda.gov/scripts/cdrh/cfdocs/cfMAUDE/Detail.CFM?MDRFOI__ID=16998681&pc=QCB	2023826-2023-01998	NA	Injury	STAAR SURGICAL COMPANY	2023-05-24 04:00:00	QCB	IMPLANTABLE COLLAMER LENS (ICL)	Inadequacy of Device Shape and/or Size	Blurred Vision	P030016	NA	1	Event Description: THE REPORTER INDICATED THAT A 12.6MM VTICM512.6 IMPLANTABLE COLLAMER LENS OF -7.00/3.0/178 (SPHERE/CYLINDER/AXIS) WAS IMPLANTED INTO THE PATIENT'S LEFT EYE (OS) ON (B)(6) 2023. ON (B)(6) 2023 THE LENS WAS EXCHANGED FOR A SAME LENGTH,DIFFERENT MODEL AND POWER LENS DUE TO EXCESSIVE VAULT. IT WAS REPORTED THAT ASTIGMATISM WAS TREATED WITH RELAXING INISION. PROBLEM RESOLVED. THE RE…	Lens Exchange	Resolved
https://www.accessdata.fda.gov/scripts/cdrh/cfdocs/cfMAUDE/Detail.CFM?MDRFOI__ID=17007679&pc=QCB	2023826-2023-02045	NA	Malfunction	STAAR SURGICAL COMPANY	2023-05-25 04:00:00	QCB	IMPLANTABLE COLLAMER LENS (ICL)	Misfocusing	Blurred Vision	P030016	NA	1	Event Description: THE REPORTER INDICATED THAT THE SURGEON IMPLANTED A 13.7MM VTICMO13.7 IMPLANTABLE COLLAMER LENS, -14.5/1.5/066 (SPHERE/CYLINDER/AXIS), INTO SON'S LEFT EYE (OS) ON (B)(6) 2023 FOR CORRECTION OF -12 DIOPTERS OF MYOPIA AND -2 DIOPTERS OF ASTIGMATISM. THE REPORTER STATES " AFTER THE SECOND POST-OPERATIVE VISIT MY SON COMPLAINS OF BLURRY VISION AND THE SURGEON REALIZES THAT THE 2 DI…	Lens Retention	Unknown
https://www.accessdata.fda.gov/scripts/cdrh/cfdocs/cfMAUDE/Detail.CFM?MDRFOI__ID=17039566&pc=QCB	2023826-2023-01885	2022-09-11 04:00:00	Injury	STAAR SURGICAL COMPANY	2023-06-01 04:00:00	QCB	IMPLANTABLE COLLAMER LENS (ICL)	Misfocusing; Off-Label Use; Device Dislodged or Dislocated; Optical Problem	Blurred Vision	P030016	NA	1	Event Description: THE REPORTER INDICATED THAT THE SURGEON IMPLANTED A 12.1MM VTICMO12.1, -16.00/4.5/002 (SPHERE/CYLINDER/AXIS), IMPLANTABLE COLLAMER LENS INTO THE PATIENT'S RIGHT EYE (OD) ON (B)(6)2022. LENS ROTATION NOT ASSOCIATED TO A LOW VAULT AND REFRACTIVE CHANGE OVERTIME WAS OBSERVED. ON (B)(6)2023 THE LENS WAS EXCHANGED FOR A DIFFERENT POWER LENS, THIS RESOLVED THE PROBLEM. CAUSE OF THE E…	Lens Exchange	Resolved
https://www.accessdata.fda.gov/scripts/cdrh/cfdocs/cfMAUDE/Detail.CFM?MDRFOI__ID=17039571&pc=QCB	2023826-2023-01888	2023-03-09 05:00:00	Injury	STAAR SURGICAL COMPANY	2023-06-01 04:00:00	QCB	IMPLANTABLE COLLAMER LENS (ICL)	Misfocusing	Blurred Vision	P030016	NA	1	Event Description: THE REPORTER INDICATED THAT A 12.6MM, VTICM5_12.6, -9.5/3.0/022 (SPHERE/CYLINDER/AXIS), IMPLANTABLE COLLAMER LENS WAS IMPLANTED INTO THE PATIENT'S EYE. REFRACTION WAS OBSERVED. LENS REMAINS IMPLANTED. ADDITIONAL INFORMATION HAS BEEN REQUESTED BUT NONE HAS BEEN FORTHCOMING. Manufacturer Narrative: A1 - A6: UNK. B3: UNK. D2 - PRODUCT CODE: UNK (ESUBMITTER SOFTWARE DOES NOT ALLOW …	Lens Exchange	Resolved
https://www.accessdata.fda.gov/scripts/cdrh/cfdocs/cfMAUDE/Detail.CFM?MDRFOI__ID=17039736&pc=QCB	2023826-2023-02153	2023-04-25 04:00:00	Malfunction	STAAR SURGICAL COMPANY	2023-06-01 04:00:00	QCB	IMPLANTABLE COLLAMER LENS (ICL)	Misfocusing	Blurred Vision	P030016	NA	1	Event Description: THE REPORTER INDICATED THAT THE SURGEON IMPLANTED A 13.2MM VTICM5_13.2; -6.00/+1.0/174 (SPHERE/CYLINDER/AXIS) IMPLANTABLE COLLAMER LENS INTO THE PATIENT'S RIGHT EYE (OD). THE PATIENT EXPERIENCED REFRACTIVE SURPRISE. LENS REMAINS IMPLANTED. THE CAUSE OF THE EVENT WAS REPORTED AS UNKNOWN. Manufacturer Narrative: H6 - TYPE OF INVESTIGATION: 4110 - LENS WORK ORDER SEARCH: NO SIMILA…	Lens Retention	Unknown
https://www.accessdata.fda.gov/scripts/cdrh/cfdocs/cfMAUDE/Detail.CFM?MDRFOI__ID=17054422&pc=QCB	2023826-2023-02173	2023-05-09 04:00:00	Injury	STAAR SURGICAL COMPANY	2023-06-02 04:00:00	QCB	IMPLANTABLE COLLAMER LENS (ICL)	Misfocusing	Blurred Vision	P030016	NA	1	Event Description: THE REPORTER INDICATED THAT THE SURGEON IMPLANTED A 13.7MM VTICMO13.7; -10.0/2.0/090 (SPHERE/CYLINDER/AXIS) IMPLANTABLE COLLAMER LENS INTO THE PATIENT'S LEFT EYE (OS) ON (B)(6) 2023. THE PATIENT EXPERIENCED REFRACTIVE SURPRISE. ON (B)(6) 2023 THE LENS WAS EXPLANTED. ON THIS SAME DATE A REPLACEMENT LENS OF THE SAME LENGTH, MODEL, AND POWER WAS IMPLANTED BUT THIS DID NOT RESOLVE …	Lens Exchange	Not_Resolved
https://www.accessdata.fda.gov/scripts/cdrh/cfdocs/cfMAUDE/Detail.CFM?MDRFOI__ID=17061058&pc=QCB	2023826-2023-02039	2023-01-11 05:00:00	Injury	STAAR SURGICAL COMPANY	2023-06-05 04:00:00	QCB	IMPLANTABLE COLLAMER LENS (ICL)	Misfocusing	Blurred Vision	P030016	NA	1	Event Description: THE REPORTER INDICATED THAT THE SURGEON IMPLANTED A 12.1MM VTICM5_12.1, -5.0/1.0/079 (SPHERE/CYLINDER/AXIS), IMPLANTABLE COLLAMER LENS INTO THE PATIENT'S RIGHT EYE (OD) ON (B)(6) 2023. THE LENS WAS REPLACED WITH A SAME LENGTH DIFFERENT POWER LENS DUE TO REFRACTIVE SURPRISE ON (B)(6) 2023. THIS RESOLVED THE PROBLEM. Manufacturer Narrative: H3: DEVICE EVALUATION - LENS WAS RETURN…	Lens Exchange	Resolved
https://www.accessdata.fda.gov/scripts/cdrh/cfdocs/cfMAUDE/Detail.CFM?MDRFOI__ID=17062290&pc=QCB	2023826-2023-02038	2023-02-10 05:00:00	Injury	STAAR SURGICAL COMPANY	2023-06-05 04:00:00	QCB	IMPLANTABLE COLLAMER LENS (ICL)	Misfocusing	Blurred Vision	P030016	NA	1	Event Description: THE REPORTER INDICATED THAT THE SURGEON IMPLANTED A 12.6MM VTICM5_12.6, -9.5/1.0/090 (SPHERE/CYLINDER/AXIS), IMPLANTABLE COLLAMER LENS INTO THE PATIENT'S RIGHT EYE (OD) ON (B)(6)2023. THE LENS WAS REPLACED WITH A DIFFERENT POWER LENS DUE TO REFRACTIVE SURPRISE ON (B)(6) 2023. THIS RESOLVED THE PROBLEM. Manufacturer Narrative: H3: DEVICE EVALUATION - LENS WAS RETURNED IN MICROCE…	Lens Exchange	Resolved
https://www.accessdata.fda.gov/scripts/cdrh/cfdocs/cfMAUDE/Detail.CFM?MDRFOI__ID=17066749&pc=QCB	2023826-2023-02221	2023-03-06 05:00:00	Injury	STAAR SURGICAL COMPANY	2023-06-05 04:00:00	QCB	IMPLANTABLE COLLAMER LENS (ICL)	Misfocusing; Off-Label Use	Blurred Vision	P030016	NA	1	Event Description: THE REPORTER INDICATED THAT A 12.6MM VTICMO12.6 IMPLANTABLE COLLAMER LENS OF -8.5/1.0/091 (SPHERE/CYLINDER/AXIS) WAS IMPLANTED INTO THE PATIENT'S LEFT EYE (OS) ON (B)(6) 2023. ON (B)(6) 2023 THE LENS WAS EXCHANGED FOR A DIFFERENT POWER LENS DUE TO REFRACTIVE SURPRISE. THE EXCHANGE RESOLVED THE PROBLEM. CAUSE OF EVENT WAS UNKNOWN. Manufacturer Narrative: DEVICE EVALUATION: H3 - …	Lens Exchange	Resolved
https://www.accessdata.fda.gov/scripts/cdrh/cfdocs/cfMAUDE/Detail.CFM?MDRFOI__ID=17076192&pc=QCB	2023826-2023-02226	2023-05-14 04:00:00	Injury	STAAR SURGICAL COMPANY	2023-06-06 04:00:00	QCB	IMPLANTABLE COLLAMER LENS (ICL)	Misfocusing	Blurred Vision	P030016	NA	1	Event Description: THE REPORTER INDICATED THAT A 12.6MM VTICM512.6 IMPLANTABLE COLLAMER LENS OF A -7.00/1.0/070 (SPHERE/CYLIDNER/AXIS) WAS IMPLANTED INTO THE PATIENT'S LEFT EYE (OS) ON (B)(6)2023. REFRACTIVE SUPRISE WAS OBSERVED. CAUSE OF THE EVENT WAS: DEVICE, A PATIENT RELATED FACTOR, AND UNKNOWN. THE DEVICE DID NOT FAIL AS INTENDED. REPORTEDLY, "NO PROBLEM WITH THE PROCEDURE AND TEST DATA, BUT…	Lens Exchange	Resolved
https://www.accessdata.fda.gov/scripts/cdrh/cfdocs/cfMAUDE/Detail.CFM?MDRFOI__ID=17084116&pc=QCB	2023826-2023-02230	2022-11-16 05:00:00	Malfunction	STAAR SURGICAL COMPANY	2023-06-07 04:00:00	QCB	IMPLANTABLE COLLAMER LENS (ICL)	Misfocusing; Patient-Device Incompatibility	Blurred Vision	P030016	NA	1	Event Description: THE REPORTER INDICATED THAT A 13.2MM VTICM513.2 IMPLANTABLE COLLAMER LENS OF -.05/6/140 (SPHERE/CYLINDER/AXIS) WAS IMPLANTED INTO THE PATIENT'S LEFT EYE (OS) ON (B)(6) 2022. ON 18-MAY-2023, REFRACTIVE SUPRISE WAS OBSERVED. CAUSE OF THE EVENT WAS REPORTED AS BOTH THE DEVICE AND A PATIENT RELATED FACTOR. REPORTEDLY, "LENS WAS NOT AVAILABLE. HAD TO WAIT FOR STAAR TO MANUFACTURE (N…	Unknown	Not_Resolved
https://www.accessdata.fda.gov/scripts/cdrh/cfdocs/cfMAUDE/Detail.CFM?MDRFOI__ID=17089408&pc=QCB	2023826-2023-02232	2023-03-03 05:00:00	Injury	STAAR SURGICAL COMPANY	2023-06-08 04:00:00	QCB	IMPLANTABLE COLLAMER LENS (ICL)	Misfocusing	Blurred Vision	P030016	NA	1	Event Description: THE REPORTER INDICATED THAT A 13.2MM VTICMO13.2 IMPLANTABLE COLLAMER LENS OF -12.0/4.5/177 (SPHERE/CYLINDER/AXIS) WAS IMPLANTED INTO THE PATIENT'S LEFT EYE (OS) ON (B)(6) 2023. ON (B)(6) 2023, THE LENS WAS EXCHANGED FOR A SAME SIZE LENS, IMPLANTED VERTICALLY DUE TO REFRACTIVE SURPRISE. THE PROBLEM WAS RESOLVED. REPORTEDLY, "BOTH LENS ARE PLACED VERTICALLY." CAUSE OF THE EVENT I…	Lens Exchange	Resolved
https://www.accessdata.fda.gov/scripts/cdrh/cfdocs/cfMAUDE/Detail.CFM?MDRFOI__ID=17093105&pc=QCB	2023826-2023-02236	2023-04-15 04:00:00	Injury	STAAR SURGICAL COMPANY	2023-06-08 04:00:00	QCB	IMPLANTABLE COLLAMER LENS (ICL)	Misfocusing; Off-Label Use	Blurred Vision	P030016	NA	1	Event Description: THE REPORTER INDICATED THAT A 12.6MM VTICMO12.6 IMPLANTABLE COLLAMER LENS OF -14.0/1.0/035 (SPHERE/CYLINDER/AXIS) WAS IMPLANTED INTO THE PATIENT'S LEFT EYE (OS) ON (B)(6) 2023. ON (B)(6)2023, THE LENS WAS EXCHANGED FOR A REPLACEMENT LENS DUE TO BLURRED VISION. REPORTEDLY, "THE PATIENT WAS NOT SATISFIED WITH THE POSTOPERATIVE VISUAL QUALITY, AND THE CLINICIAN FOUND THAT THE PATI…	Lens Exchange	Resolved
https://www.accessdata.fda.gov/scripts/cdrh/cfdocs/cfMAUDE/Detail.CFM?MDRFOI__ID=17102366&pc=QCB	2023826-2023-02186	2023-02-27 05:00:00	Injury	STAAR SURGICAL COMPANY	2023-06-11 04:00:00	QCB	IMPLANTABLE COLLAMER LENS (ICL)	Misfocusing	Blurred Vision	P030016	NA	1	Event Description: THE REPORTER INDICATED THE SURGEON IMPLANTED A 12.6MM VTICM5_12.6 IMPLANTABLE COLLAMER LENS, -06.00/+1.5/093 (SPHERE/CYLINDER/AXIS), INTO THE PATIENTS LEFT EYE (OS) ON (B)(6) 2022. THE PATIENT EXPERIENCED A REFRACTIVE SURPRISE AND BLURRED VISION. THE LENS REMAINED IMPLANTED. ADDITIONAL INFORMATION HAS BEEN REQUESTED BUT NONE HAS BEEN FORTHCOMING. Manufacturer Narrative: B5: THE…	Lens Exchange	Resolved
https://www.accessdata.fda.gov/scripts/cdrh/cfdocs/cfMAUDE/Detail.CFM?MDRFOI__ID=17105578&pc=QCB	2023826-2023-02268	2023-05-13 04:00:00	Malfunction	STAAR SURGICAL COMPANY	2023-06-12 04:00:00	QCB	IMPLANTABLE COLLAMER LENS (ICL)	Misfocusing	Blurred Vision	P030016	NA	1	Event Description: THE REPORTER INDICATED THAT A 12.6MM VTICM5_12.6 IMPLANTABLE COLLAMER LENS OF -09.50/4.0/088 (SPHERE/CYLINDER/AXIS) WAS IMPLANTED INTO THE PATIENT'S RIGHT EYE (OD) ON 24-FEB-2023. THE PATIENT EXPERIENCED REFRACTIVE SURPRISE, LENS REMAINS IMPLANTED. IF ADDITIONAL INFORMATION IS RECEIVED A SUPPLEMENTAL MEDWATCH REPORT WILL BE SUBMITTED. Manufacturer Narrative: H6 - TYPE OF INVEST…	Lens Retention	Unknown
https://www.accessdata.fda.gov/scripts/cdrh/cfdocs/cfMAUDE/Detail.CFM?MDRFOI__ID=17105579&pc=QCB	2023826-2023-02269	2023-05-13 04:00:00	Malfunction	STAAR SURGICAL COMPANY	2023-06-12 04:00:00	QCB	IMPLANTABLE COLLAMER LENS (ICL)	Misfocusing	Blurred Vision	P030016	NA	1	Event Description: THE REPORTER INDICATED THAT A 12.6MM VTICM5_12.6 IMPLANTABLE COLLAMER LENS OF -8.50/3.5/080 (SPHERE/CYLINDER/AXIS) WAS IMPLANTED INTO THE PATIENT'S LEFT EYE (OS) ON (B)(6) 2023. THE PATIENT EXPERIENCED REFRACTIVE SURPRISE, LENS REMAINS IMPLANTED. IF ADDITIONAL INFORMATION IS RECEIVED A SUPPLEMENTAL MEDWATCH REPORT WILL BE SUBMITTED. Manufacturer Narrative: H6 - TYPE OF INVESTIG…	Lens Retention	Unknown
https://www.accessdata.fda.gov/scripts/cdrh/cfdocs/cfMAUDE/Detail.CFM?MDRFOI__ID=17119691&pc=QCB	2023826-2023-02163	2023-01-04 05:00:00	Injury	STAAR SURGICAL COMPANY	2023-06-13 04:00:00	QCB	IMPLANTABLE COLLAMER LENS (ICL)	Misfocusing	Blurred Vision	P030016	NA	1	Event Description: THE REPORTER INDICATED THAT A 12.6MM, VTICM0 12.6, -9.0/1.5/090 (SPHERE/CYLINDER/AXIS), IMPLANTABLE COLLAMER LENS WAS IMPLANTED INTO THE PATIENT'S LEFT EYE (OS) ON (B)(6) 2023. ON (B)(6) 2023 THE LENS WAS REPLACED WITH A SAME SIZE , SIMILARE (SPHERE/CYLINDER/AXIS) LENS DUE TO REFRACTIVE SURPRISE. THE PROBLEM WAS RESOLVED. CAUSE OF THE EVENT IS REPORTED AS UNKNOWN. Manufacturer …	Lens Exchange	Resolved
https://www.accessdata.fda.gov/scripts/cdrh/cfdocs/cfMAUDE/Detail.CFM?MDRFOI__ID=17140261&pc=QCB	2023826-2023-02405	2019-08-27 04:00:00	Malfunction	STAAR SURGICAL COMPANY	2023-06-15 04:00:00	QCB	IMPLANTABLE COLLAMER LENS (ICL)	Misfocusing	Blurred Vision	P030016	NA	1	Event Description: THE REPORTER INDICATED THAT THE SURGEON IMPLANTED A 13.2MM VTICM5_13.2; -09.00/+20/90 (SPHERE/CYLINDER/AXIS) IMPLANTABLE COLLAMER LENS INTO THE PATIENT'S LEFT EYE (OS) ON (B)(6)2019. THE PATIENT NOW HAS REFRACTIVE SURPRISE. LEN REMAINS IMPLANTED. IF ADDITIONAL INFORMATION IS RECEIVED A SUPPLEMENTAL MEDWATCH REPORT WILL BE SUBMITTED. Manufacturer Narrative: H6 - TYPE OF INVESTIG…	Lens Retention	Unknown
https://www.accessdata.fda.gov/scripts/cdrh/cfdocs/cfMAUDE/Detail.CFM?MDRFOI__ID=17159843&pc=QCB	2023826-2023-02439	2023-04-25 04:00:00	Injury	STAAR SURGICAL COMPANY	2023-06-19 04:00:00	QCB	IMPLANTABLE COLLAMER LENS (ICL)	Misfocusing	Blurred Vision	P030016	NA	1	Event Description: THE REPORTER INDICATED THAT THE SURGEON IMPLANTED A 13.2MM VTICM5_13.2; -10.0/+2.5/76 (SPHERE/CYLINDER/AXIS) IMPLANTABLE COLLAMER LENS INTO THE PATIENT'S RIGHT EYE (OD) ON (B)(6) 2023. THE PATIENT EXPERIENCED REFRACTIVE SURPRISE. LENS REMAINS IMPLANTED. Manufacturer Narrative: ADDITIONAL INFORMATION: B5: THE REPORTER INDICATED THAT THE SURGEON IMPLANTED A 13.2MM VTICM5_13.2; -1…	Lens Exchange	Not_Resolved
https://www.accessdata.fda.gov/scripts/cdrh/cfdocs/cfMAUDE/Detail.CFM?MDRFOI__ID=17185665&pc=QCB	2023826-2023-02524	2022-09-09 04:00:00	Injury	STAAR SURGICAL COMPANY	2023-06-22 04:00:00	QCB	IMPLANTABLE COLLAMER LENS (ICL)	Misfocusing	Blurred Vision	P030016	NA	1	Event Description: THE REPORTER INDICATED THAT THE SURGEON IMPLANTED A 12.6MM VTICMO12.6; -9.0/2.5/089 (SPHERE/CYLINDER/AXIS) IMPLANTABLE COLLAMER LENS INTO THE PATIENT'S LEFT EYE (OS) ON (B)(6) 2021. THE PATIENT EXPERIENCED REFRACTIVE SURPRISE WHICH WAS NOTED ON (B)(6) 2022. ON (B)(6) 2023 THE LENS WAS EXCHANGED WITH A SAME LENGTH/MODEL LENS BUT DIFFERENT POWER LENS. THIS RESOLVED THE PROBLEM. T…	Lens Exchange	Resolved
https://www.accessdata.fda.gov/scripts/cdrh/cfdocs/cfMAUDE/Detail.CFM?MDRFOI__ID=17210598&pc=QCB	2023826-2023-02570	2023-04-21 04:00:00	Injury	STAAR SURGICAL COMPANY	2023-06-27 04:00:00	QCB	IMPLANTABLE COLLAMER LENS (ICL)	Misfocusing	Blurred Vision	P030016	NA	1	Event Description: THE REPORTER INDICATED THAT THE SURGEON IMPLANTED A 13.2MM VTICM5_13.2; -13.0/3.0/7 (SPHERE/CYLINDER/AXIS) IMPLANTABLE COLLAMER LENS INTO THE PATIENT'S LEFT EYE (OS) ON (B)(6) 2023. THE PATIENT EXPERIENCED REFRACTIVE SURPRISE. ON (B)(6) 2023 THE LENS WAS EXCHANGED WITH A SAME LENGTH BUT DIFFERENT MODEL AND POWER LENS AND THIS RESOLVED THE PROBLEM. THE CAUSE OF THE EVENT WAS REP…	Lens Exchange	Resolved
https://www.accessdata.fda.gov/scripts/cdrh/cfdocs/cfMAUDE/Detail.CFM?MDRFOI__ID=17216367&pc=QCB	2023826-2023-02428	2023-02-17 05:00:00	Injury	STAAR SURGICAL COMPANY	2023-06-28 04:00:00	QCB	IMPLANTABLE COLLAMER LENS (ICL)	Misfocusing	Blurred Vision	P030016	NA	1	Event Description: THE REPORTER INDICATED THAT A 12.6MM, VTICM5_12.6, -12.0/1.0/078 (SPHERE/CYLINDER/AXIS), IMPLANTABLE COLLAMER LENS WAS IMPLANTED INTO THE PATIENT'S RIGHT EYE (OD) ON (B)(6)2023. REFRACTIVE SURPRISE WAS OBSERVED. LASER TOUCH UP WAS PERFORMED ON (B)(6)2023. PROBLEM RESOLVED. CAUSE OF THE EVENT IS REPORTED AS UNKNOWN. REPORTEDLY, PATIENT IS FINE AND ALL IS FINE. Manufacturer Narra…	Lens Retention + Secondary Operation	Resolved
https://www.accessdata.fda.gov/scripts/cdrh/cfdocs/cfMAUDE/Detail.CFM?MDRFOI__ID=17217896&pc=QCB	2023826-2023-02504	2022-12-09 05:00:00	Injury	STAAR SURGICAL COMPANY	2023-06-28 04:00:00	QCB	IMPLANTABLE COLLAMER LENS (ICL)	Misfocusing; Off-Label Use	Blurred Vision	P030016	NA	1	Event Description: THE REPORTER INDICATED THAT A 12.6MM VTICM512.6 IMPLANTABLE COLLAMER LENS OF A -5.0/1.0/82 (SPHERE/CYLIDNER/AXIS) WAS IMPLANTED INTO THE PATIENT'S RIGHT EYE (OD) ON (B)(6) 2022. ON (B)(6) 2023, THE LENS WAS REMOVED AND REPLACED DUE TO REFRACTIVE SURPRISE. THE PROBLEM WAS RESOLVED. THE CAUSE OF THE EVENT IS UNKNOWN. REPORTEDLY "DARE TO CORRECT LOW MONOVISION." Manufacturer Narra…	Lens Exchange	Resolved
https://www.accessdata.fda.gov/scripts/cdrh/cfdocs/cfMAUDE/Detail.CFM?MDRFOI__ID=17222268&pc=QCB	2023826-2023-02601	2021-03-01 05:00:00	Injury	STAAR SURGICAL COMPANY	2023-06-28 04:00:00	QCB	IMPLANTABLE COLLAMER LENS (ICL)	Misfocusing	Blurred Vision	P030016	NA	1	Event Description: THE REPORTER INDICATED THAT A 13.2MM VTICM513.2 IMPLANTABLE COLLAMER LENS OF -10.5/3/009 (SPHERE/CYLINDER/AXIS) WAS IMPLANTED IN THE PATIENT'S RIGHT EYE (OD) ON (B)(6) 2021. REFRACTIVE SURPRISE WAS OBSERVED. CAUSE OF THE EVENT IS UNKNOWN. REFRACTIVE TREATMENT WAS PERFORMED AND THE PROBLEM WAS RESOLVED. REPORTEDLY, "ALL IS GOOD PATIENT IS HAPPY," AND "THE RESIDUAL RX: +1.25/-1.2…	Lens Retention + Secondary Operation	Resolved
https://www.accessdata.fda.gov/scripts/cdrh/cfdocs/cfMAUDE/Detail.CFM?MDRFOI__ID=17253208&pc=QCB	2023826-2023-02693	2023-03-03 05:00:00	Injury	STAAR SURGICAL COMPANY	2023-07-03 04:00:00	QCB	IMPLANTABLE COLLAMER LENS (ICL)	Misfocusing; Inadequacy of Device Shape and/or Size	Blurred Vision	P030016	NA	1	Event Description: THE REPORTER INDICATED THAT A 12.6MM VTICMO12.6 IMPLANTABLE COLLAMER LENS OF -9.5/2.5/074 (SPHERE/CYLINDER/AXIS) WAS IMPLANTED INTO THE PATIENT'S RIGHT EYE (OD) ON (B)(6) 2023. ON (B)(6) 2023 THE LENS WAS EXCHANGED FOR A DIFFERENT LENGTH AND POWER LENS DUE TO EXCESSIVE VAULT AND REFRACTIVE SURPRISE. THE EXCHANGE RESOLVED THE PROBLEM. CAUSE OF EVENT WAS UNKNOWN. Manufacturer Nar…	Lens Exchange	Resolved
https://www.accessdata.fda.gov/scripts/cdrh/cfdocs/cfMAUDE/Detail.CFM?MDRFOI__ID=17261853&pc=QCB	2023826-2023-02737	2022-08-19 04:00:00	Injury	STAAR SURGICAL COMPANY	2023-07-05 04:00:00	QCB	IMPLANTABLE COLLAMER LENS (ICL)	Misfocusing	Blurred Vision	P030016	NA	1	Event Description: THE REPORTER INDICATED THAT THE SURGEON IMPLANTED A 12.1MM VTICMO12.1; -10.0/1.5/091 (SPHERE/CYLINDER/AXIS) IMPLANTABLE COLLAMER LENS INTO THE PATIENT'S LEFT EYE (OS) ON (B)(6) 2022. THE PATIENT EXPERIENCED REFRACTIVE SURPRISE. THE LENS WAS EXPLANTED ON (B)(6) 2022. ON (B)(6) 2023 A REPLACEMENT LENS OF THE SAME LENGTH BUT DIFFERENT POWER WAS IMPLANTED AND THIS RESOLVED THE PROB…	Lens Exchange	Resolved
https://www.accessdata.fda.gov/scripts/cdrh/cfdocs/cfMAUDE/Detail.CFM?MDRFOI__ID=17273273&pc=QCB	2023826-2023-02722	NA	Injury	STAAR SURGICAL COMPANY	2023-07-06 04:00:00	QCB	IMPLANTABLE COLLAMER LENS (ICL)	Misfocusing	Blurred Vision	P030016	NA	1	Event Description: THE REPORTER INDICATED THAT THE SURGEON IMPLANTED A 13.2MM VTICM5_13.2; -8.5/+4.5/88 (SPHERE/CYLINDER/AXIS) IMPLANTABLE COLLAMER LENS INTO THE PATIENT'S LEFT EYE (OS) ON (B)(6) 2022. THE PATIENT EXPERIENCED REFRACTIVE SURPRISE. ON (B)(6) 2023 THE SURGEON PERFORMED PRK SURGERY ON THE PATIENT. LENS REMAINS IMPLANTED. THE PROBLEM WAS REPORTED AS NOT RESOLVED. Manufacturer Narrativ…	Lens Retention + Secondary Operation	Not_Resolved
https://www.accessdata.fda.gov/scripts/cdrh/cfdocs/cfMAUDE/Detail.CFM?MDRFOI__ID=17278996&pc=QCB	2023826-2023-02610	2023-03-20 04:00:00	Injury	STAAR SURGICAL COMPANY	2023-07-07 04:00:00	QCB	IMPLANTABLE COLLAMER LENS (ICL)	Misfocusing	Blurred Vision	P030016	NA	1	Event Description: THE REPORTER INDICATED THAT A 12.6MM, VTICM0_12.6, -10.0/2.5/088 (SPHERE/CYLINDER/AXIS), IMPLANTABLE COLLAMER LENS WAS IMPLANTED INTO THE PATIENT'S RIGHT EYE (OD) ON (B)(6) 2022. ON (B)(6) 2023 THE LENS WAS REPLACED WITH A SAME SIZE , DIFFERENT POWER (SPHERE/CYLINDER/AXIS) LENS DUE TO REFRACTIVE SURPRISE. THE PROBLEM WAS RESOLVED. CAUSE OF THE EVENT IS REPORTED AS UNKNOWN. Manu…	Lens Exchange	Resolved
https://www.accessdata.fda.gov/scripts/cdrh/cfdocs/cfMAUDE/Detail.CFM?MDRFOI__ID=17283187&pc=QCB	2023826-2023-02724	2023-01-03 05:00:00	Injury	STAAR SURGICAL COMPANY	2023-07-07 04:00:00	QCB	IMPLANTABLE COLLAMER LENS (ICL)	Misfocusing; Off-Label Use	Blurred Vision	P030016	NA	1	Event Description: THE REPORTER INDICATED THAT THE SURGEON IMPLANTED A 12.6MM VTICMO12.6; -13.5/2.0/086 (SPHERE/CYLINDER/AXIS) IMPLANTABLE COLLAMER LENS INTO THE PATIENT'S RIGHT EYE (OD) ON (B)(6) 2022. THE PATIENT EXPERIENCED REFRACTIVE SURPRISE. ON (B)(6) 2023 THE LENS WAS EXCHANGED WITH A SAME LENGTH BUT DIFFERENT POWER LENS AND THIS RESOLVED THE PROBLEM. THE CAUSE OF THE EVENT WAS REPORTED AS…	Lens Exchange	Resolved
https://www.accessdata.fda.gov/scripts/cdrh/cfdocs/cfMAUDE/Detail.CFM?MDRFOI__ID=17283882&pc=QCB	2023826-2023-02676	NA	Malfunction	STAAR SURGICAL COMPANY	2023-07-07 04:00:00	QCB	IMPLANTABLE COLLAMER LENS (ICL)	Misfocusing	Blurred Vision	P030016	NA	1	Event Description: THE REPORTER INDICATED THAT A 12.6MM VTICM512.6 IMPLANTABLE COLLAMER LENS OF -5.00/2.0/092(SPHERE/CYLINDER/AXIS) WAS IMPLANTED AS A REPLACEMENT INTO THE PATIENT'S RIGHT EYE (OD) ON (B)(6) 2023. THE PROBLEM WAS NOT RESOLVED. REPORTEDLY, "DATA STATUS IS FINE. THE PATIENT IS UNDER OBSERVATION BECAUSE OF LACK OF VISUAL ACUITY". Manufacturer Narrative: A4-A6:UNK. H6: WORK ORDER SEAR…	Unknown	Not_Resolved
https://www.accessdata.fda.gov/scripts/cdrh/cfdocs/cfMAUDE/Detail.CFM?MDRFOI__ID=17283884&pc=QCB	2023826-2023-02675	2023-03-09 05:00:00	Injury	STAAR SURGICAL COMPANY	2023-07-07 04:00:00	QCB	IMPLANTABLE COLLAMER LENS (ICL)	Misfocusing	Blurred Vision	P030016	NA	1	Event Description: THE REPORTER INDICATED THAT A 12.6MM VTICM512.6 IMPLANTABLE COLLAMER LENS OF -4.5/1.5/93 (SPHERE/CYLINDER/AXIS) WAS IMPLANTED INTO THE PATIENT'S RIGHT EYE (OD) ON (B)(6) 2023. ON (B)(6) 2023, THE LENS WAS REMOVED AND A REPLACEMENT LENS WAS LATER IMPLANTED. THE PROBLEM WAS NOT RESOLVED. REPORTEDLY, "DATA STATUS IS FINE. THE PATIENT IS UNDER OBSERVATION BECAUSE OF LACK OF VISUAL …	Lens Exchange	Not_Resolved
https://www.accessdata.fda.gov/scripts/cdrh/cfdocs/cfMAUDE/Detail.CFM?MDRFOI__ID=17297503&pc=QCB	2023826-2023-02785	2023-03-07 05:00:00	Injury	STAAR SURGICAL COMPANY	2023-07-11 04:00:00	QCB	IMPLANTABLE COLLAMER LENS (ICL)	Misfocusing; Inadequacy of Device Shape and/or Size	Blurred Vision	P030016	NA	1	Event Description: THE REPORTER INDICATED THAT THE SURGEON IMPLANTED A 13.2MM VTICM5_13.2, -6.0/2.5/088 (SPHERE/CYLINDER/AXIS), IMPLANTABLE COLLAMER LENS INTO THE PATIENT'S RIGHT EYE (OD) ON (B)(6)2023. THE LENS WAS REPLACED WITH A DIFFERENT POWER, SHORTER LENGTH LENS DUE TO REFRACTIVE SURPRISE AND EXCESSIVE VAULT ON (B)(6) 2023. THIS RESOLVED THE PROBLEM. CAUSE OF THE EVENT IS REPORTED AS UNKNOW…	Lens Exchange	Resolved
https://www.accessdata.fda.gov/scripts/cdrh/cfdocs/cfMAUDE/Detail.CFM?MDRFOI__ID=17297504&pc=QCB	2023826-2023-02786	2023-03-07 05:00:00	Injury	STAAR SURGICAL COMPANY	2023-07-11 04:00:00	QCB	IMPLANTABLE COLLAMER LENS (ICL)	Misfocusing; Inadequacy of Device Shape and/or Size	Blurred Vision	P030016	NA	1	Event Description: THE REPORTER INDICATED THAT THE SURGEON IMPLANTED A 13.2MM VTICM5_13.2, -6.0/2.5/087 (SPHERE/CYLINDER/AXIS), IMPLANTABLE COLLAMER LENS INTO THE PATIENT'S LEFT EYE (OS) ON (B)(6) 2023. THE LENS WAS REPLACED WITH A DIFFERENT POWER, SHORTER LENGTH LENS DUE TO REFRACTIVE SURPRISE AND EXCESSIVE VAULT ON (B)(6) 2023. THIS RESOLVED THE PROBLEM. CAUSE OF THE EVENT IS REPORTED AS UNKNOW…	Lens Exchange	Resolved
https://www.accessdata.fda.gov/scripts/cdrh/cfdocs/cfMAUDE/Detail.CFM?MDRFOI__ID=17313215&pc=QCB	2023826-2023-02878	2023-02-02 05:00:00	Injury	STAAR SURGICAL COMPANY	2023-07-12 04:00:00	QCB	IMPLANTABLE COLLAMER LENS (ICL)	Misfocusing; Inadequacy of Device Shape and/or Size	Blurred Vision	P030016	NA	1	Event Description: THE REPORTER INDICATED THAT THE SURGEON IMPLANTED A 13.2MM VTICM5_13.2; -3.50/2.5/95 (SPHERE/CYLINDER/AXIS) IMPLANTABLE COLLAMER LENS INTO THE PATIENT'S RIGHT EYE (OD) ON (B)(6) 2023. THE PATIENT EXPERIENCED LOW VAULTING AND REFRACTIVE SURPRISE. ON (B)(6) 2023 THE LENS WAS EXPLANTED AND ON THIS SAME DATE A REPLACEMENT LENS OF A LONGER LENGTH AND DIFFERENT POWER WAS IMPLANTED AN…	Lens Exchange	Resolved
https://www.accessdata.fda.gov/scripts/cdrh/cfdocs/cfMAUDE/Detail.CFM?MDRFOI__ID=17322358&pc=QCB	2023826-2023-02846	2023-06-07 04:00:00	Malfunction	STAAR SURGICAL COMPANY	2023-07-13 04:00:00	QCB	IMPLANTABLE COLLAMER LENS (ICL)	Misfocusing; Inadequacy of Device Shape and/or Size	Blurred Vision	P030016	NA	1	Event Description: THE REPORTER INDICATED THAT A 12.6MM VTICM5_12.6 IMPLANTABLE COLLAMER LENS OF -14.00/2.0/163 (SPHERE/CYLINDER/AXIS) WAS IMPLANTED INTO THE PATIENTS RIGHT EYE (OD) ON (B)(6) 2023. THE PATIENT EXPERIENCED EXCESSIVE VAULT AND RESIDUAL MANIFEST REFRACTION. THE REPORTER STATES THE CAUSE OF THIS EVENT IS UNKNOWN. THE REPORTER ALSO STATES IT IS UNKNOWN IF THE DEVICE FAILED TO PERFORM …	Unknown	Unknown
https://www.accessdata.fda.gov/scripts/cdrh/cfdocs/cfMAUDE/Detail.CFM?MDRFOI__ID=17322375&pc=QCB	2023826-2023-02847	2023-06-07 04:00:00	Malfunction	STAAR SURGICAL COMPANY	2023-07-13 04:00:00	QCB	IMPLANTABLE COLLAMER LENS (ICL)	Misfocusing; Inadequacy of Device Shape and/or Size	Blurred Vision	P030016	NA	1	Event Description: THE REPORTER INDICATED THAT A 12.6MM VTICM5_12.6 IMPLANTABLE COLLAMER LENS OF -12.00/1.0/032 (SPHERE/CYLINDER/AXIS) WAS IMPLANTED INTO THE PATIENTS LEFT EYE (OS) ON \(B)(6) 2023. THE PATIENT EXPERIENCED EXCESSIVE VAULT AND RESIDUAL MANIFEST REFRACTION. THE REPORTER STATES THE CAUSE OF THIS EVENT IS UNKNOWN. THE REPORTER ALSO STATES IT IS UNKNOWN IF THE DEVICE FAILED TO PERFORM …	Unknown	Unknown
https://www.accessdata.fda.gov/scripts/cdrh/cfdocs/cfMAUDE/Detail.CFM?MDRFOI__ID=17330143&pc=QCB	2023826-2023-02929	2023-05-13 04:00:00	Injury	STAAR SURGICAL COMPANY	2023-07-14 04:00:00	QCB	IMPLANTABLE COLLAMER LENS (ICL)	Misfocusing; Inadequacy of Device Shape and/or Size	Blurred Vision	P030016	NA	1	Event Description: THE REPORTER INDICATED THAT THE SURGEON IMPLANTED A 13.2MM VTICMO13.2; -12.5/2.5/087 (SPHERE/CYLINDER/AXIS) IMPLANTABLE COLLAMER LENS INTO THE PATIENT'S LEFT EYE (OS) ON (B)(6) 2023. THE PATIENT EXPERIENCED EXCESSIVE VAULTING AND REFRACTIVE SURPRISE. ON (B)(6) 2023 THE LENS WAS EXCHANGED WITH A SAME LENGTH BUT DIFFERENT POWER LENS AND IMPLANTED VERTICALLY. THIS RESOLVED THE PRO…	Lens Exchange	Resolved
https://www.accessdata.fda.gov/scripts/cdrh/cfdocs/cfMAUDE/Detail.CFM?MDRFOI__ID=17330144&pc=QCB	2023826-2023-02927	2023-06-30 04:00:00	Injury	STAAR SURGICAL COMPANY	2023-07-14 04:00:00	QCB	IMPLANTABLE COLLAMER LENS (ICL)	Misfocusing	Blurred Vision	P030016	NA	1	Event Description: THE REPORTER INDICATED THAT THE SURGEON IMPLANTED A 13.2MM VTICMO13.2; -9.0/2.5/095 (SPHERE/CYLINDER/AXIS) IMPLANTABLE COLLAMER LENS INTO THE PATIENT'S LEFT EYE (OS) ON (B)(6) 2023. THE PATIENT EXPERIENCED REFRACTIVE SURPRISE. ON (B)(6) 2023 THE LENS WAS EXCHANGED WITH A SAME LENGTH BUT DIFFERENT POWER LENS. THIS RESOLVED THE PROBLEM. THE CAUSE OF THE EVENT WAS REPORTED AS UNKN…	Lens Exchange	Resolved
https://www.accessdata.fda.gov/scripts/cdrh/cfdocs/cfMAUDE/Detail.CFM?MDRFOI__ID=17338891&pc=QCB	2023826-2023-02980	NA	Malfunction	STAAR SURGICAL COMPANY	2023-07-17 04:00:00	QCB	IMPLANTABLE COLLAMER LENS (ICL)	Misfocusing; Off-Label Use	Blurred Vision	P030016	NA	1	Event Description: THE REPORTER INDICATED THAT THE SURGEON IMPLANTED A 12.6MM VTICMO12.6; -7.50/6.0/138 (SPHERE/CYLINDER/AXIS) IMPLANTABLE COLLAMER LENS INTO THE PATIENT'S RIGHT EYE (OD) IN 2016. THE SURGEON REPORTS THE ICL AXIS IS AT 5 DEGREES BUT REFRACTIVE IS +2.50-6.25@157 AND INDICATED THE PATIENT HAS ASTIGMATISM. POSSIBLE LENS ROTATION PLANNED. LENS REMAINS IMPLANTED. Manufacturer Narrative…	Lens Retention	Unknown
https://www.accessdata.fda.gov/scripts/cdrh/cfdocs/cfMAUDE/Detail.CFM?MDRFOI__ID=17380973&pc=QCB	2023826-2023-03138	NA	Malfunction	STAAR SURGICAL COMPANY	2023-07-24 04:00:00	QCB	IMPLANTABLE COLLAMER LENS (ICL)	Misfocusing	Blurred Vision	P030016	NA	1	Event Description: THE REPORTER INDICATED THAT A 13.2MM VTICM5_13.2 IMPLANTABLE COLLAMER LENS OF -2.00/3.5/162 (SPHERE/CYLINDER/AXIS) WAS IMPLANTED INTO THE PATIENT'S LEFT EYE (OS) ON (B)(6) 2023. THE PATIENT EXPERIENCED REFRACTIVE SURPRISE, LENS REMAINS IMPLANTED. IF ADDITIONAL INFORMATION IS RECEIVED A SUPPLEMENTAL MEDWATCH REPORT WILL BE SUBMITTED. Manufacturer Narrative: B5- THE REPORTER INDI…	Lens Retention	Not_Resolved
https://www.accessdata.fda.gov/scripts/cdrh/cfdocs/cfMAUDE/Detail.CFM?MDRFOI__ID=17383221&pc=QCB	2023826-2023-03139	NA	Injury	STAAR SURGICAL COMPANY	2023-07-24 04:00:00	QCB	IMPLANTABLE COLLAMER LENS (ICL)	Misfocusing	Blurred Vision	P030016	NA	1	Event Description: THE REPORTER INDICATED THAT A 13.2MM VTICMO13.2 IMPLANTABLE COLLAMER LENS OF -8.50/3.5/114 (SPHERE/CYLINDER/AXIS) WAS IMPLANTED INTO THE PATIENT'S RIGHT EYE (OD) ON (B)(6) 2023. THE PATIENT EXPERIENCED REFRACTIVE SURPRISE. IT WAS REPORTED THAT ON (B)(6) 2023 LENS REPOSITIONING WAS PERFORMED BUT IT DID NOT RESOLVE THE PROBLEM. LENS REMAINS IMPLANTED. THE CAUSE OF THE EVENT IS UN…	Lens Retention	Unknown
https://www.accessdata.fda.gov/scripts/cdrh/cfdocs/cfMAUDE/Detail.CFM?MDRFOI__ID=17385329&pc=QCB	2023826-2023-03154	2023-06-28 04:00:00	Injury	STAAR SURGICAL COMPANY	2023-07-24 04:00:00	QCB	IMPLANTABLE COLLAMER LENS (ICL)	Misfocusing; Device Dislodged or Dislocated	Blurred Vision	P030016	NA	1	Event Description: THE REPORTER INDICATED THAT THE SURGEON IMPLANTED A 13.2MM VTICM5_13.2; -6.50/+5.0/58 (SPHERE / CYLINDER / AXIS) IMPLANTABLE COLLAMER LENS INTO THE PATIENT'S RIGHT EYE (OD) ON (B)(6) 2023. THE PATIENT EXPERIENCED LENS ROTATION NOT ASSOCIATED TO LOW VAULTING AND REFRACTIVE SURPRISE. ON (B)(6) 2023 THE LENS WAS REPOSITIONED BUT THIS DID NOT RESOLVE THE PROBLEM. THE CAUSE OF THE E…	Lens Exchange	Resolved
https://www.accessdata.fda.gov/scripts/cdrh/cfdocs/cfMAUDE/Detail.CFM?MDRFOI__ID=17391261&pc=QCB	2023826-2023-03039	NA	Malfunction	STAAR SURGICAL COMPANY	2023-07-25 04:00:00	QCB	IMPLANTABLE COLLAMER LENS (ICL)	Misfocusing	Blurred Vision	P030016	NA	1	Event Description: THE REPORTER INDICATED THAT AN IMPLANTABLE COLLAMER LENS WAS IMPLANTED INTO THE PATIENT'S EYE. REFRACTIVE SURPRISE WAS OBSERVED. LENS REMAINS IMPLANTED. ADDITIONAL INFORMATION HAS BEEN REQUESTED BUT NONE HAS BEEN FORTHCOMING. Manufacturer Narrative: ADDITIONAL INFORMATION: A2 - (B)(6) 2023; A3 - M; B3 - 10-MAY-2023. B5 - REPORTED AS: THE REPORTER INDICATED THAT AN IMPLANTABLE C…	Lens Retention + Secondary Operation	Resolved
https://www.accessdata.fda.gov/scripts/cdrh/cfdocs/cfMAUDE/Detail.CFM?MDRFOI__ID=17417150&pc=QCB	2023826-2023-03133	2023-06-26 04:00:00	Injury	STAAR SURGICAL COMPANY	2023-07-28 04:00:00	QCB	IMPLANTABLE COLLAMER LENS (ICL)	Misfocusing	Blurred Vision	P030016	NA	1	Event Description: THE REPORTER INDICATED THAT A 12.6MM VTICMO12.6 IMPLANTABLE COLLAMER LENS OF -17.0/3.0/002 (SPHERE/CYLINDER/AXIS) WAS IMPLANTED INTO THE PATIENT'S LEFT EYE (OS) ON (B)(6) 2023. ON (B)(6) 2023, THE LENS WAS REMOVED AND LATER REPLACED A SAME LENGTH SIZE LENS DUE TO REFRACTIVE SURPRISE. THE PROBLEM WAS NOT RESOLVED. CAUSE OF THE EVENT WAS UNKNOWN. REPORTEDLY, "THE PATIENT WENT TO …	Lens Exchange	Resolved
https://www.accessdata.fda.gov/scripts/cdrh/cfdocs/cfMAUDE/Detail.CFM?MDRFOI__ID=17417153&pc=QCB	2023826-2023-03132	2023-06-22 04:00:00	Injury	STAAR SURGICAL COMPANY	2023-07-28 04:00:00	QCB	IMPLANTABLE COLLAMER LENS (ICL)	Misfocusing	Blurred Vision	P030016	NA	1	Event Description: THE REPORTER INDICATED THAT A 12.6MM VTICMO12.6 IMPLANTABLE COLLAMER LENS OF -16.0/2.5/176 (SPHERE/CYLINDER/AXIS) WAS IMPLANTED INTO THE PATIENT'S RIGHT EYE (OD) ON (B)(6) 2023. ON (B)(6) 2023, THE LENS WAS REMOVED AND LATER REPLACED A SAME LENGTH SIZE LENS DUE TO REFRACTIVE SURPRISE. THE PROBLEM WAS RESOLVED. CAUSE OF THE EVENT WAS UNKNOWN. REPORTEDLY, "THE PATIENT WENT TO THE…	Lens Exchange	Resolved
https://www.accessdata.fda.gov/scripts/cdrh/cfdocs/cfMAUDE/Detail.CFM?MDRFOI__ID=17440469&pc=QCB	2023826-2023-03207	2023-07-04 04:00:00	Malfunction	STAAR SURGICAL COMPANY	2023-08-02 04:00:00	QCB	IMPLANTABLE COLLAMER LENS (ICL)	Misfocusing	Blurred Vision	P030016	NA	1	Event Description: THE REPORTER INDICATED THAT A 12.6MM VTICM512.6 IMPLANTABLE COLLAMER LENS OF -8.00/1.00/82 (SPHERE/CYLINDER/AXIS) WAS IMPLANTED INTO THE PATIENT'S RIGHT EYE (OD) ON (B)(6) 2023. REFRACTIVE SUPRISE HAS BEEN OBSERVED. REPORTEDLY, "PATIENT UNDERWENT SURGERY ON (B)(6) 2023, THE NEXT DAY SHE HAD VA 0.4. IN THE REVISION OF (B)(6) 2023, SHE STILL HAD VA 0.4 WITH RESIDUAL REFRACTION OF…	Lens Retention	Not_Resolved
https://www.accessdata.fda.gov/scripts/cdrh/cfdocs/cfMAUDE/Detail.CFM?MDRFOI__ID=17446725&pc=QCB	2023826-2023-03291	2023-06-22 04:00:00	Injury	STAAR SURGICAL COMPANY	2023-08-02 04:00:00	QCB	IMPLANTABLE COLLAMER LENS (ICL)	Misfocusing	Blurred Vision	P030016	NA	1	Event Description: THE REPORTER INDICATED THAT THE SURGEON IMPLANTED A 12.6MM VTICM5_12.6; -5.50/1.0/113 (SPHERE/CYLINDER/AXIS) IMPLANTABLE COLLAMER LENS INTO THE PATIENT'S RIGHT EYE (OD) ON (B)(6) 2023. THE PATIENT EXPERIENCED REFRACTIVE SURPRISE WHICH WAS NOTED ON (B)(6) 2023. LENS REMAINS IMPLANTED. IF ADDITIONAL INFORMATION IS RECEIVED A SUPPLEMENTAL MEDWATCH REPORT WILL BE SUBMITTED. Manufac…	Lens Exchange	Resolved
https://www.accessdata.fda.gov/scripts/cdrh/cfdocs/cfMAUDE/Detail.CFM?MDRFOI__ID=17447261&pc=QCB	2023826-2023-03213	2023-05-12 04:00:00	Injury	STAAR SURGICAL COMPANY	2023-08-02 04:00:00	QCB	IMPLANTABLE COLLAMER LENS (ICL)	Misfocusing	Blurred Vision	P030016	NA	1	Event Description: THE REPORTER INDICATED THAT A 12.6MM VTICMO12.6 IMPLANTABLE COLLAMER LENS OF -5.0/0.5/010 (SPHERE/CYLINDER/AXIS) WAS IMPLANTED INTO THE PATIENT'S LEFT EYE (OS) ON (B)(6) 2023. ON (B)(6) 2023, THE LENS WAS EXCHANGED FOR A SAME SIZE LENS DUE TO REFRACTIVE SURPRISE. THE PROBLEM WAS RESOLVED. REPORTEDLY, "BOTH TIMES IN HORIZONTAL POSITION." CAUSE OF THE EVENT IS UNKNOWN. Manufactur…	Lens Exchange	Resolved
https://www.accessdata.fda.gov/scripts/cdrh/cfdocs/cfMAUDE/Detail.CFM?MDRFOI__ID=17476696&pc=QCB	2023826-2023-03334	2023-07-17 04:00:00	Injury	STAAR SURGICAL COMPANY	2023-08-07 04:00:00	QCB	IMPLANTABLE COLLAMER LENS (ICL)	Misfocusing	Blurred Vision	P030016	NA	1	Event Description: THE REPORTER INDICATED THAT THE SURGEON IMPLANTED A 13.2MM VTICM5_13.; -2.50/+6.0/068 (SPHERE/CYLINDER/AXIS) IMPLANTABLE COLLAMER LENS INTO THE PATIENT'S LEFT EYE (OS) ON (B)(6) 2023. THE PATIENT EXPERIENCED REFRACTIVE SURPRISE. THE LENS REMAINS IMPLANTED. THE CAUSE OF THE EVENT WAS REPORTED AS UNKNOWN. IF ADDITIONAL INFORMATION IS RECEIVED A SUPPLEMENTAL MEDWATCH REPORT WILL B…	Lens Extraction	Resolved
https://www.accessdata.fda.gov/scripts/cdrh/cfdocs/cfMAUDE/Detail.CFM?MDRFOI__ID=17477169&pc=QCB	2023826-2023-03333	2023-07-17 04:00:00	Injury	STAAR SURGICAL COMPANY	2023-08-07 04:00:00	QCB	IMPLANTABLE COLLAMER LENS (ICL)	Misfocusing	Blurred Vision	P030016	NA	1	Event Description: THE REPORTER INDICATED THAT THE SURGEON IMPLANTED A 13.2MM VTICM5_13.2; -0.50/+2.0/143 (SPHERE/CYLINDER/AXIS) IMPLANTABLE COLLAMER LENS INTO THE PATIENT'S RIGHT EYE (OD) ON (B)(6) 2023. THE PATIENT EXPERIENCED REFRACTIVE SURPRISE. THE LENS REMAINS IMPLANTED. IF ADDITIONAL INFORMATION IS RECEIVED A SUPPLEMENTAL MEDWATCH REPORT WILL BE SUBMITTED. Manufacturer Narrative: H6 - TYPE…	Lens Extraction	Resolved
https://www.accessdata.fda.gov/scripts/cdrh/cfdocs/cfMAUDE/Detail.CFM?MDRFOI__ID=17483721&pc=QCB	2023826-2023-03348	2023-06-09 04:00:00	Injury	STAAR SURGICAL COMPANY	2023-08-08 04:00:00	QCB	IMPLANTABLE COLLAMER LENS (ICL)	Misfocusing	Blurred Vision	P030016	NA	1	Event Description: THE REPORTER INDICATED THAT A 12.6MM VTICM5 12.6 IMPLANTABLE COLLAMER LENS OF -12.0/2.0/089 (SPHERE/CYLINDER/AXIS) WAS IMPLANTED INTO THE PATIENT'S RIGHT EYE (OD) ON (B)(6) 2023. REFRACTIVE SURPRISE WAS OBSERVED. ON (B)(6) 2023 THE LENS WAS EXCHANGED FOR A SAME MODEL AND SIZE LENS WITH DIFFERENT POWER AND THE PROBLEM WAS RESOLVED. CAUSE REPORTED AS UNKNOWN. Manufacturer Narrati…	Lens Exchange	Resolved
https://www.accessdata.fda.gov/scripts/cdrh/cfdocs/cfMAUDE/Detail.CFM?MDRFOI__ID=17484473&pc=QCB	2023826-2023-03355	NA	Injury	STAAR SURGICAL COMPANY	2023-08-08 04:00:00	QCB	IMPLANTABLE COLLAMER LENS (ICL)	Misfocusing; Inadequacy of Device Shape and/or Size	Blurred Vision	P030016	NA	1	Event Description: THE REPORTER INDICATED THAT A 12.6MM VTICM5_12.6 IMPLANTABLE COLLAMER LENS OF -14.00/2.5/072 (SPHERE/CYLINDER/AXIS) WAS IMPLANTED INTO THE PATIENT'S LEFT EYE (OS) ON (B)(6) 2023. PATIENTS VISION AFTER SURGERY WAS 20/50 +1 WITH VAULT AROUND 1000. AFTER 2 WEEKS WITH NO VISUAL IMPROVEMENT, THE LENS WAS EXCHANGED FOR A SHORTER LENGTH LENS OF DIFFERENT POWER. IF ADDITIONAL INFORMATI…	Lens Exchange	Resolved
[truncated: 1,219 more rows]
